# Supplementary material for: Identification of New Differentially Methylated Genes That Have Potential Functional Consequences in Prostate Cancer
Source: PubMed Central journal article supplement (PMC3485209; doi:10.1371/journal.pone.0048455), 2012-10-31

Figure S5.

**A**

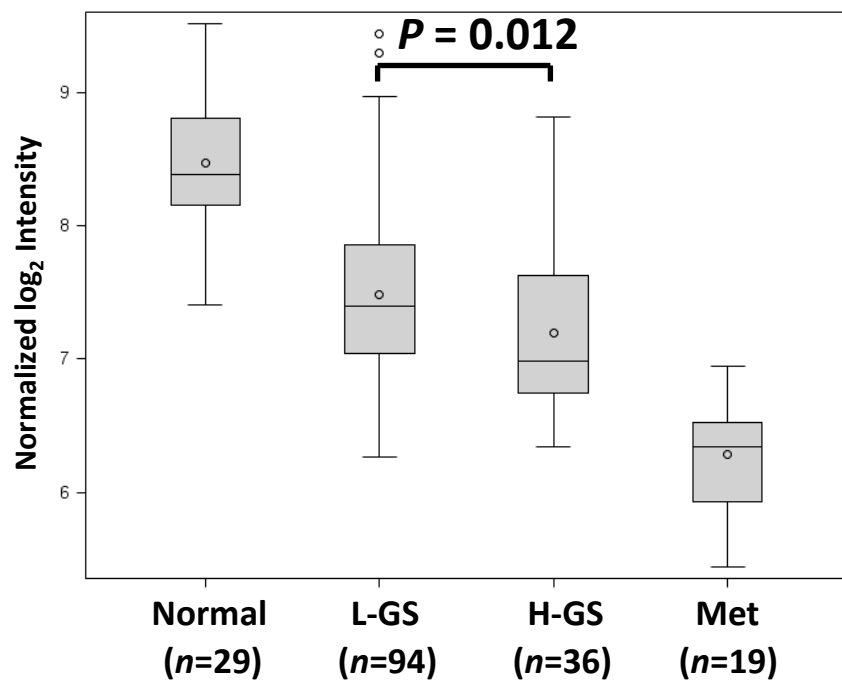

**B**

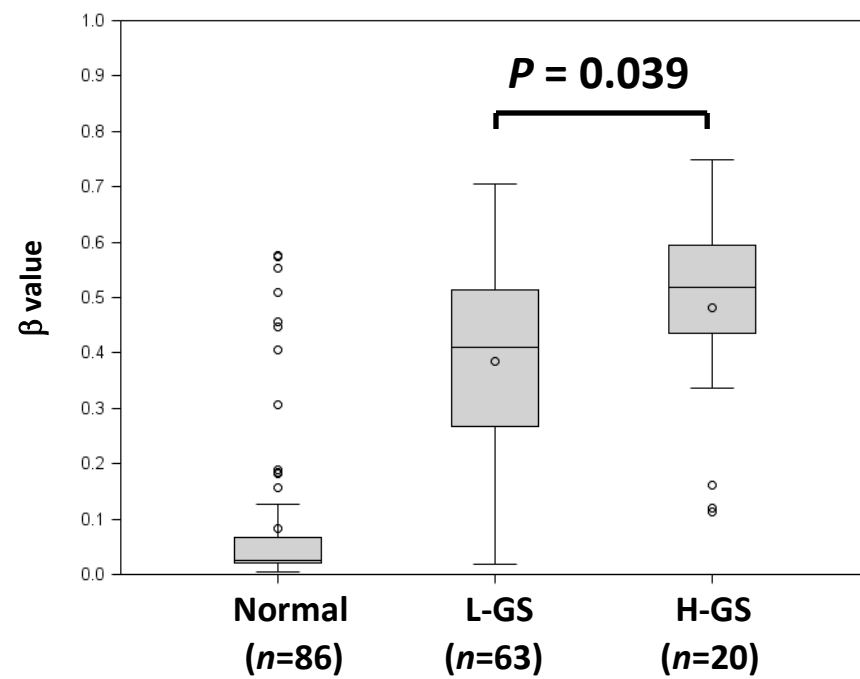

Supplement: pone.0048455.s005.pdf [file pone.0048455.s005.pdf]
