# Supplementary material for: Identification of New Differentially Methylated Genes That Have Potential Functional Consequences in Prostate Cancer
Source: PubMed Central journal article supplement (PMC3485209; doi:10.1371/journal.pone.0048455), 2012-10-31
Supplement: pone.0048455.s008.pdf [file pone.0048455.s008.pdf]

Table S1. Primer sequences for bisulfite sequencing assay.

| Reaction     | Forward primer          | Reverse primer           | Size of amplicone | Size of sequence reading | Total number of sequenced CpG sites |
|--------------|-------------------------|--------------------------|-------------------|--------------------------|-------------------------------------|
| <i>AOX1</i>  | AGTTTTTGGTAAAGAGTTTAGGA | ACCCCTAATAAACAAAAATACTTT | 567 bp            | 400 bp                   | 36                                  |
| <i>SPON2</i> | AGGTTTATGAATTTGGGTTTAT  | CCTACCCAAAACCTAAAAAAT    | 455 bp            | 400 bp                   | 27                                  |

All primer are 5' →3' oriented.
