# Supplementary material for: Identification of New Differentially Methylated Genes That Have Potential Functional Consequences in Prostate Cancer
Source: PubMed Central journal article supplement (PMC3485209; doi:10.1371/journal.pone.0048455), 2012-10-31
Supplement: pone.0048455.s009.pdf [file pone.0048455.s009.pdf]

Table S2. Clinicopathological information of tissue samples.

A. Information of the HM450 profiling samples.

|                   | PCa       | Normal   |
|-------------------|-----------|----------|
| Number of samples | 19        | 4        |
| Age (mean±S.D)    | 65.8±4.5  | 68.5±4.4 |
| Gleason score     |           |          |
| 6                 | 3 (15.8)  | -        |
| 3+4               | 5 (26.3)  | -        |
| 4+3               | 3 (15.8)  | -        |
| 9                 | 3 (15.8)  | -        |
| 10                | 1 (5.3)   | -        |
| n.a.              | 4 (21.1)  | -        |
| BCR               |           |          |
| Yes               | 10 (52.6) | -        |
| No                | 7 (36.8)  | -        |
| n.a               | 2 (10.5)  | -        |
| TNM               |           |          |
| T2a               | 1 (5.3)   | -        |
| T2b               | 5 (26.3)  | -        |
| T2c               | 1 (5.3)   | -        |
| T3a               | 4 (21.1)  | -        |
| T3b               | 4 (21.1)  | -        |
| Tx                | 2 (10.5)  | -        |
| n.a.              | 2 (10.5)  | -        |

Value in parentheses indicates the percentage of cases presenting the group.

n.a.: not available.

BCR: biochemical recurrence

B. Information of the bisulfite sequencing samples.

|                   | PCa       | Normal    |
|-------------------|-----------|-----------|
| Number of samples | 56        | 55        |
| Age (mean±S.D)    | 59.8±6.3  | 59.7±6.5  |
| Race              |           |           |
| European American | 49 (87.5) | 47 (85.5) |
| African American  | 4 (7.1)   | 4 (7.3)   |
| Other             | -         | 1 (1.8)   |
| n.a.              | 3 (5.4)   | 3 (5.5)   |
| Gleason score     |           |           |
| 5                 | 1 (1.8)   | -         |
| 6                 | 9 (16.1)  | -         |
| 3+4               | 18 (32.1) | -         |
| 4+3               | 7 (12.5)  | -         |
| 8                 | 5 (8.9)   | -         |
| 9                 | 14 (25.0) | -         |
| 10                | 1 (1.8)   | -         |
| n.a.              | 1 (1.8)   | -         |
| TNM               |           |           |
| T2                | 5 (8.9)   | -         |
| T3a               | 22 (39.3) | -         |
| T3b               | 22 (39.3) | -         |
| n.a.              | 7 (12.5)  | -         |
| N0                | 36 (64.3) | -         |
| N1                | 13 (23.2) | -         |
| n.a.              | 7 (12.5)  | -         |

Value in parentheses indicates the percentage of cases presenting the group.

n.a.: not available.
