# Supplementary material for: Identification of New Differentially Methylated Genes That Have Potential Functional Consequences in Prostate Cancer
Source: PubMed Central journal article supplement (PMC3485209; doi:10.1371/journal.pone.0048455), 2012-10-31
Supplement: pone.0048455.s010.pdf [file pone.0048455.s010.pdf]

Table S3. List of DMCs from HM450 data.

| Taeget_ID  | chr | locus       | FDR $P$  | $\Delta\beta^*$ | $\Delta\beta^*$ of paired samples | HM27 <sup>#</sup> _FDR $P$ | HM27 <sup>#</sup> _ $\Delta\beta^*$ | SNP locus | Gene Symbol      | Genomic region |
|------------|-----|-------------|----------|-----------------|-----------------------------------|----------------------------|-------------------------------------|-----------|------------------|----------------|
| cg12539796 | 5   | 7,850,203   | 4.82E-43 | 0.697           | 0.704                             |                            |                                     |           | <i>C5orf49</i>   | Body           |
| cg14117138 | 19  | 46,800,085  | 1.11E-62 | 0.650           | 0.650                             |                            |                                     |           | <i>HIF3A</i>     | TSS1500        |
| cg03596016 | 1   | 246,952,362 | 4.41E-71 | 0.635           | 0.611                             |                            |                                     |           | <i>LOC149134</i> | TSS1500        |
| cg17355294 | 19  | 51,416,098  | 4.84E-32 | 0.614           | 0.621                             |                            |                                     |           |                  |                |
| cg26388816 | 12  | 570,155     | 6.49E-38 | 0.612           | 0.577                             |                            |                                     |           | <i>B4GALNT3</i>  | Body           |
| cg16596604 | 16  | 21,294,947  | 2.22E-38 | 0.605           | 0.602                             |                            |                                     |           | <i>CRYM</i>      | 5'UTR          |
| cg22473620 | 19  | 46,379,929  | 9.64E-63 | 0.603           | 0.583                             |                            |                                     |           |                  |                |
| cg00817367 | 12  | 52,401,214  | 5.25E-77 | 0.603           | 0.586                             |                            |                                     |           | <i>GRASP</i>     | Body           |
| cg11863717 | 10  | 73,725,041  | 7.77E-16 | 0.598           | 0.615                             |                            |                                     |           | <i>CHST3</i>     | 5'UTR          |
| cg22260952 | 12  | 104,852,446 | 2.1E-36  | 0.597           | 0.565                             |                            |                                     |           | <i>CHST11</i>    | Body           |
| cg24033558 | 15  | 45,479,755  | 1.06E-46 | 0.596           | 0.565                             |                            |                                     |           | <i>SHF</i>       | Body           |
| cg26786980 | 3   | 25,469,872  | 2.72E-43 | 0.596           | 0.601                             |                            |                                     |           | <i>RARB</i>      | 5'UTR          |
| cg01030534 | 7   | 143,579,698 | 2.64E-72 | 0.594           | 0.597                             |                            |                                     |           | <i>FAM115A</i>   | 5'UTR          |
| cg08901662 | 2   | 131,595,321 | 1.12E-59 | 0.590           | 0.542                             |                            |                                     |           |                  |                |
| cg04223671 | 1   | 201,509,316 | 3.32E-10 | 0.590           | 0.512                             |                            |                                     |           |                  |                |
| cg03514404 | 7   | 143,579,665 | 8.21E-45 | 0.588           | 0.571                             |                            |                                     |           | <i>FAM115A</i>   | 5'UTR          |
| cg18525352 | 12  | 106,533,867 | 1.28E-52 | 0.585           | 0.573                             |                            |                                     |           | <i>NUAK1</i>     | TSS200         |
| cg23855505 | 12  | 104,852,439 | 1.19E-65 | 0.585           | 0.556                             |                            |                                     |           | <i>CHST11</i>    | Body           |
| cg10069493 | 10  | 45,914,688  | 4.86E-22 | 0.584           | 0.540                             |                            |                                     |           | <i>ALOX5</i>     | Body           |
| cg00675569 | 10  | 45,914,840  | 1.91E-30 | 0.578           | 0.566                             |                            |                                     |           | <i>ALOX5</i>     | Body           |
| cg13506653 | 4   | 54,965,863  | 5.48E-06 | 0.578           | 0.633                             |                            |                                     |           | <i>GSX2</i>      | TSS1500        |
| cg05415131 | 11  | 58,940,866  | 5.79E-74 | 0.578           | 0.575                             |                            |                                     |           | <i>DTX4</i>      | Body           |
| cg20601919 | 2   | 219,646,831 | 0.001593 | 0.577           | 0.407                             |                            |                                     |           | <i>CYP27A1</i>   | 5'UTR          |
| cg18856388 | 5   | 1,875,886   | 3.42E-17 | 0.576           | 0.538                             |                            |                                     |           |                  |                |
| cg04497116 | 6   | 1,625,574   | 1.37E-13 | 0.575           | 0.546                             |                            |                                     |           | <i>GMDS</i>      | Body           |
| cg05618150 | Y   | 7,140,718   | 9.57E-24 | 0.575           | 0.569                             |                            |                                     |           | <i>PRKY</i>      | TSS1500        |
| cg23241781 | 14  | 70,653,964  | 1.76E-41 | 0.574           | 0.578                             |                            |                                     |           | <i>SLC8A3</i>    | 5'UTR          |
| cg24396624 | 3   | 25,469,860  | 3.55E-58 | 0.573           | 0.565                             |                            |                                     |           | <i>RARB</i>      | 5'UTR          |
| cg20883831 | 7   | 150,652,948 | 3.61E-22 | 0.572           | 0.564                             |                            |                                     |           | <i>KCNH2</i>     | TSS200         |
| cg25737323 | 2   | 29,338,100  | 1.13E-06 | 0.572           | 0.440                             |                            |                                     |           | <i>CLIP4</i>     | TSS1500        |
| cg05064925 | X   | 107,681,469 | 3.3E-46  | 0.572           | 0.566                             |                            |                                     |           | <i>COL4A6</i>    | 1stExon        |

|            |    |             |          |       |       |          |       |  |                 |         |
|------------|----|-------------|----------|-------|-------|----------|-------|--|-----------------|---------|
| cg05306745 | 17 | 76,921,845  | 2.67E-35 | 0.571 | 0.539 |          |       |  | <i>TIMP2</i>    | TSS1500 |
| cg03225210 | 7  | 143,579,951 | 3.57E-46 | 0.569 | 0.580 |          |       |  | <i>FAM115A</i>  | 5'UTR   |
| cg09296001 | 7  | 127,672,564 | 2.6E-115 | 0.569 | 0.561 |          |       |  | <i>SND1</i>     | Body    |
| cg01710865 | 1  | 48,937,404  | 1.8E-07  | 0.568 | 0.440 |          |       |  | <i>SPATA6</i>   | Body    |
| cg19897330 | 5  | 180,018,201 | 6.51E-25 | 0.568 | 0.575 |          |       |  | <i>SCGB3A1</i>  | Body    |
| cg13132370 | 17 | 46,830,260  | 1.98E-60 | 0.567 | 0.573 |          |       |  |                 |         |
| cg14931854 | 6  | 42,738,967  | 3.69E-19 | 0.567 | 0.533 |          |       |  |                 |         |
| cg27151711 | X  | 47,441,773  | 0.000218 | 0.566 | 0.526 |          |       |  | <i>SYN1</i>     | Body    |
| cg11450947 | X  | 106,750,342 | 1.54E-09 | 0.562 | 0.598 |          |       |  |                 |         |
| cg26537639 | 16 | 88,717,374  | 1.79E-51 | 0.561 | 0.539 | 2.82E-33 | 0.357 |  | <i>CYBA</i>     | 1stExon |
| cg12507655 | 7  | 100,465,051 | 1.18E-50 | 0.561 | 0.549 |          |       |  | <i>TRIP6</i>    | 1stExon |
| cg05270634 | 17 | 41,177,445  | 1.48E-34 | 0.560 | 0.538 | 4.72E-28 | 0.379 |  | <i>RND2</i>     | 1stExon |
| cg21914941 | 7  | 158,261,145 | 6.34E-26 | 0.559 | 0.565 |          |       |  | <i>PTPRN2</i>   | Body    |
| cg24208826 | 12 | 54,389,891  | 3.96E-07 | 0.558 | 0.482 |          |       |  |                 |         |
| cg15236541 | X  | 73,642,618  | 1.29E-30 | 0.557 | 0.515 |          |       |  | <i>SLC16A2</i>  | Body    |
| cg24452181 | 19 | 48,984,318  | 1.35E-28 | 0.554 | 0.572 |          |       |  | <i>CYTH2</i>    | 3'UTR   |
| cg16277128 | 1  | 146,556,479 | 4.3E-09  | 0.554 | 0.524 |          |       |  |                 |         |
| cg04194674 | 17 | 36,715,953  | 7.75E-10 | 0.553 | 0.461 |          |       |  | <i>SRCIN1</i>   | Body    |
| cg27493151 | 19 | 38,701,994  | 3.11E-12 | 0.553 | 0.607 |          |       |  | <i>DPF1</i>     | 3'UTR   |
| cg03787864 | 16 | 88,717,134  | 1.36E-08 | 0.552 | 0.489 |          |       |  | <i>CYBA</i>     | Body    |
| cg14904662 | 8  | 41,655,673  | 1E-14    | 0.552 | 0.481 |          |       |  | <i>ANK1</i>     | TSS1500 |
| cg05769889 | 12 | 89,744,701  | 1.4E-15  | 0.550 | 0.493 |          |       |  | <i>DUSP6</i>    | Body    |
| cg14936968 | 3  | 57,198,533  | 7E-114   | 0.550 | 0.527 |          |       |  | <i>IL17RD</i>   | Body    |
| cg08843517 | 16 | 88,717,464  | 8.38E-52 | 0.548 | 0.532 |          |       |  | <i>CYBA</i>     | TSS200  |
| cg06484514 | 21 | 46,824,278  | 1E-23    | 0.547 | 0.475 |          |       |  | <i>COL18A1</i>  | TSS1500 |
| cg18582992 | 15 | 45,479,642  | 4.6E-71  | 0.547 | 0.552 |          |       |  | <i>SHF</i>      | Body    |
| cg05127821 | 10 | 94,822,908  | 5.39E-31 | 0.545 | 0.525 |          |       |  | <i>CYP26C1</i>  | Body    |
| cg24180402 | 17 | 43,221,464  | 2.95E-08 | 0.542 | 0.426 |          |       |  | <i>ACBD4</i>    | 3'UTR   |
| cg11716106 | 19 | 46,380,134  | 3.08E-82 | 0.542 | 0.524 |          |       |  |                 |         |
| cg18222083 | 17 | 41,364,007  | 1.97E-13 | 0.542 | 0.557 |          |       |  | <i>TMEM106A</i> | 5'UTR   |
| cg04879832 | 16 | 88,717,456  | 1.03E-92 | 0.540 | 0.521 |          |       |  | <i>CYBA</i>     | 1stExon |
| cg09329826 | X  | 153,094,594 | 4.81E-29 | 0.538 | 0.487 |          |       |  | <i>PDZD4</i>    | Body    |
| cg15931205 | 6  | 29,894,820  | 2.85E-08 | 0.538 | 0.544 |          |       |  | <i>HCG4P6</i>   | TSS1500 |
| cg22237200 | 17 | 7,555,298   | 7.56E-25 | 0.538 | 0.514 |          |       |  | <i>ATP1B2</i>   | Body    |

|            |    |             |          |       |       |  |  |  |                     |         |
|------------|----|-------------|----------|-------|-------|--|--|--|---------------------|---------|
| cg07302069 | 7  | 27,196,286  | 1.44E-05 | 0.538 | 0.547 |  |  |  | <i>HOXA7</i>        | 5'UTR   |
| cg01934626 | 5  | 180,018,562 | 7.2E-117 | 0.538 | 0.534 |  |  |  | <i>SCGB3A1</i>      | TSS200  |
| cg02245020 | 7  | 143,580,147 | 4.05E-38 | 0.538 | 0.537 |  |  |  | <i>FAM115A</i>      | 5'UTR   |
| cg06248767 | 8  | 56,852,290  | 2.45E-26 | 0.537 | 0.517 |  |  |  | <i>LYN</i>          | 5'UTR   |
| cg17498803 | 8  | 61,822,428  | 4.56E-17 | 0.536 | 0.539 |  |  |  |                     |         |
| cg20678442 | 1  | 244,893,503 | 7.17E-06 | 0.536 | 0.482 |  |  |  |                     |         |
| cg24922143 | 15 | 35,014,270  | 1.93E-59 | 0.536 | 0.505 |  |  |  |                     |         |
| cg13257636 | 2  | 29,338,109  | 3.77E-08 | 0.535 | 0.413 |  |  |  | <i>CLIP4</i>        | TSS200  |
| cg23428985 | 2  | 29,338,113  | 1.87E-06 | 0.534 | 0.408 |  |  |  | <i>CLIP4</i>        | TSS200  |
| cg02027945 | 11 | 20,618,230  | 8.04E-05 | 0.534 | 0.480 |  |  |  |                     |         |
| cg12222949 | 1  | 184,005,360 | 4.3E-24  | 0.533 | 0.458 |  |  |  | <i>GLT25D2</i>      | Body    |
| cg00650640 | X  | 13,587,678  | 7.55E-18 | 0.532 | 0.564 |  |  |  | <i>EGFL6</i>        | TSS200  |
| cg22771999 | X  | 64,888,437  | 1.5E-36  | 0.532 | 0.519 |  |  |  | <i>MSN</i>          | Body    |
| cg24940138 | 17 | 41,363,741  | 1.65E-18 | 0.532 | 0.481 |  |  |  | <i>TMEM106A</i>     | TSS200  |
| cg23697546 | 12 | 54,424,085  | 1.47E-06 | 0.531 | 0.434 |  |  |  | <i>HOXC4</i>        | 5'UTR   |
| cg19156875 | 17 | 43,974,446  | 1.51E-31 | 0.531 | 0.496 |  |  |  | <i>MAPT</i>         | 5'UTR   |
| cg24275475 | X  | 107,681,397 | 1.22E-29 | 0.531 | 0.494 |  |  |  | <i>COL4A6</i>       | Body    |
| cg16755500 | 17 | 27,918,338  | 2.7E-71  | 0.531 | 0.528 |  |  |  |                     |         |
| cg21523564 | 15 | 75,251,491  | 1.15E-11 | 0.531 | 0.478 |  |  |  |                     |         |
| cg22524657 | 1  | 47,999,163  | 0.000392 | 0.530 | 0.494 |  |  |  |                     |         |
| cg03069204 | 7  | 75,535,491  | 9.34E-27 | 0.530 | 0.541 |  |  |  |                     |         |
| cg16876647 | 2  | 43,451,842  | 1.12E-05 | 0.530 | 0.485 |  |  |  | <i>ZFP36L2</i>      | Body    |
| cg09489281 | 5  | 43,604,149  | 0.001989 | 0.528 | 0.274 |  |  |  | <i>NNT</i>          | 5'UTR   |
| cg10162691 | 17 | 41,177,409  | 4.33E-20 | 0.528 | 0.493 |  |  |  | <i>RND2</i>         | 1stExon |
| cg07519235 | 16 | 19,894,978  | 6.56E-34 | 0.528 | 0.497 |  |  |  | <i>GPRC5B</i>       | 5'UTR   |
| cg17397631 | 4  | 779,880     | 1.6E-102 | 0.527 | 0.525 |  |  |  | <i>CPLX1</i>        | 3'UTR   |
| cg25363807 | 1  | 44,703,923  | 1.61E-37 | 0.526 | 0.513 |  |  |  | <i>ERI3</i>         | Body    |
| cg25726664 | 7  | 42,277,807  | 2.42E-14 | 0.526 | 0.471 |  |  |  | <i>GLI3</i>         | TSS1500 |
| cg05923595 | 1  | 33,547,713  | 1.91E-44 | 0.526 | 0.506 |  |  |  | <i>ADC</i>          | 5'UTR   |
| cg23255835 | 2  | 29,338,121  | 4.45E-07 | 0.526 | 0.406 |  |  |  | <i>CLIP4</i>        | TSS200  |
| cg06282270 | 11 | 61,062,910  | 6.88E-06 | 0.525 | 0.398 |  |  |  | <i>VWCE</i>         | TSS200  |
| cg20771240 | 11 | 133,906,693 | 6.5E-84  | 0.525 | 0.524 |  |  |  | <i>LOC100128239</i> | Body    |
| cg18423852 | 7  | 150,653,001 | 1.22E-23 | 0.524 | 0.479 |  |  |  | <i>KCNH2</i>        | TSS200  |
| cg08243728 | 19 | 45,905,890  | 4.37E-55 | 0.524 | 0.515 |  |  |  | <i>PPP1R13L</i>     | 5'UTR   |

|            |    |             |          |       |       |          |       |  |                 |         |
|------------|----|-------------|----------|-------|-------|----------|-------|--|-----------------|---------|
| cg22859061 | 5  | 180,018,503 | 2.1E-131 | 0.524 | 0.518 |          |       |  | <i>SCGB3A1</i>  | TSS200  |
| cg23179456 | 14 | 24,803,873  | 0.000836 | 0.524 | 0.557 |          |       |  | <i>ADCY4</i>    | TSS200  |
| cg09827752 | 1  | 2,461,823   | 2.85E-39 | 0.524 | 0.512 |          |       |  | <i>HES5</i>     | TSS200  |
| cg25170591 | 10 | 103,881,062 | 7.8E-26  | 0.523 | 0.524 |          |       |  | <i>LDB1</i>     | TSS1500 |
| cg22747076 | 12 | 54,447,873  | 6.78E-09 | 0.523 | 0.501 |          |       |  | <i>HOXC4</i>    | 1stExon |
| cg13555354 | 14 | 24,458,014  | 1.88E-26 | 0.522 | 0.516 |          |       |  | <i>DHRS4L2</i>  | TSS200  |
| cg00002719 | 1  | 169,396,706 | 2.91E-06 | 0.522 | 0.476 |          |       |  | <i>C1orf114</i> | TSS200  |
| cg19505129 | X  | 56,258,695  | 1.05E-10 | 0.522 | 0.476 |          |       |  | <i>KLF8</i>     | TSS200  |
| cg16786640 | 4  | 3,485,263   | 1.07E-12 | 0.521 | 0.484 |          |       |  | <i>DOK7</i>     | Body    |
| cg13875120 | 2  | 201,450,743 | 0.002612 | 0.520 | 0.494 |          |       |  | <i>AOX1</i>     | 1stExon |
| cg03900851 | 8  | 67,351,768  | 1.01E-05 | 0.520 | 0.533 |          |       |  | <i>ADHFE1</i>   | Body    |
| cg00800229 | 14 | 22,004,993  | 1.33E-32 | 0.520 | 0.501 |          |       |  | <i>SALL2</i>    | 1stExon |
| cg06331595 | 7  | 141,211,956 | 1.1E-69  | 0.519 | 0.517 |          |       |  |                 |         |
| cg20527270 | 8  | 49,468,688  | 1.18E-14 | 0.519 | 0.490 |          |       |  |                 |         |
| cg01089498 | 4  | 11,428,985  | 4.48E-62 | 0.519 | 0.508 |          |       |  | <i>HS3ST1</i>   | 5'UTR   |
| cg08350814 | 2  | 191,045,309 | 1.13E-07 | 0.519 | 0.449 |          |       |  | <i>C2orf88</i>  | TSS1500 |
| cg00100121 | 1  | 169,396,635 | 0.000593 | 0.518 | 0.483 |          |       |  | <i>C1orf114</i> | 1stExon |
| cg07330230 | 3  | 125,899,925 | 8.24E-07 | 0.518 | 0.453 |          |       |  | <i>ALDH1L1</i>  | TSS1500 |
| cg08300419 | 11 | 47,208,959  | 1.2E-129 | 0.518 | 0.519 |          |       |  | <i>PACSIN3</i>  | TSS1500 |
| cg22221554 | X  | 129,245,238 | 8.8E-09  | 0.517 | 0.412 |          |       |  | <i>ELF4</i>     | TSS1500 |
| cg21623671 | 5  | 150,536,851 | 6.35E-20 | 0.517 | 0.443 | 1.33E-30 | 0.289 |  | <i>ANXA6</i>    | 5'UTR   |
| cg09060908 | 1  | 223,743,126 | 6.81E-47 | 0.517 | 0.508 |          |       |  | <i>CAPN8</i>    | Body    |
| cg09908110 | 11 | 63,828,713  | 1.75E-26 | 0.517 | 0.517 |          |       |  | <i>MACROD1</i>  | Body    |
| cg03065447 | 8  | 49,292,486  | 0.000133 | 0.517 | 0.458 |          |       |  |                 |         |
| cg11644815 | 17 | 4,891,687   | 4.26E-12 | 0.516 | 0.409 |          |       |  | <i>INCA1</i>    | 3'UTR   |
| cg06733794 | 10 | 123,922,970 | 8.73E-44 | 0.515 | 0.500 |          |       |  | <i>TACC2</i>    | Body    |
| cg01451391 | 17 | 53,343,561  | 6.99E-21 | 0.513 | 0.492 |          |       |  | <i>HLF</i>      | Body    |
| cg04262428 | 11 | 70,673,256  | 5.08E-36 | 0.513 | 0.487 |          |       |  | <i>SHANK2</i>   | Body    |
| cg22352818 | 2  | 97,193,289  | 2.37E-68 | 0.512 | 0.488 |          |       |  |                 |         |
| cg07902749 | 2  | 37,813,553  | 7.3E-17  | 0.512 | 0.536 |          |       |  |                 |         |
| cg26676468 | 5  | 112,539,223 | 1.74E-09 | 0.512 | 0.485 |          |       |  | <i>MCC</i>      | Body    |
| cg01643123 | 12 | 63,207,179  | 6.82E-13 | 0.511 | 0.498 |          |       |  | <i>PPM1H</i>    | Body    |
| cg09994356 | 20 | 42,875,779  | 8.51E-06 | 0.511 | 0.361 |          |       |  | <i>GDAP1L1</i>  | TSS200  |
| cg15680720 | 2  | 171,568,412 | 0.011376 | 0.509 | 0.351 |          |       |  |                 |         |

|            |    |             |          |       |       |          |       |  |                |         |
|------------|----|-------------|----------|-------|-------|----------|-------|--|----------------|---------|
| cg24651977 | 4  | 37,978,758  | 4.58E-49 | 0.509 | 0.500 |          |       |  | <i>TBC1D1</i>  | Body    |
| cg19310908 | 19 | 46,800,064  | 1.37E-35 | 0.509 | 0.509 |          |       |  | <i>HIF3A</i>   | TSS1500 |
| cg09696939 | 10 | 60,272,079  | 1.19E-06 | 0.509 | 0.406 |          |       |  | <i>BICC1</i>   | TSS1500 |
| cg24331301 | 10 | 73,156,377  | 9.79E-45 | 0.509 | 0.479 |          |       |  | <i>CDH23</i>   | TSS1500 |
| cg04034767 | 12 | 52,400,907  | 2.16E-09 | 0.508 | 0.462 | 1.35E-25 | 0.331 |  | <i>GRASP</i>   | 1stExon |
| cg23108709 | 2  | 219,847,136 | 2.47E-71 | 0.508 | 0.510 |          |       |  | <i>FEV</i>     | Body    |
| cg00857907 | 2  | 202,896,898 | 9.05E-16 | 0.507 | 0.498 |          |       |  |                |         |
| cg24046411 | 16 | 88,717,646  | 6.02E-32 | 0.505 | 0.475 |          |       |  | <i>CYBA</i>    | TSS200  |
| cg00971050 | 17 | 40,573,764  | 2.18E-92 | 0.505 | 0.512 |          |       |  | <i>PTRF</i>    | Body    |
| cg18991611 | 8  | 49,468,828  | 1.17E-05 | 0.504 | 0.484 |          |       |  |                |         |
| cg21330423 | 6  | 29,975,068  | 1.44E-08 | 0.504 | 0.496 |          |       |  | <i>HLA-J</i>   | Body    |
| cg24830730 | 7  | 150,653,195 | 1.07E-36 | 0.504 | 0.499 |          |       |  | <i>KCNH2</i>   | Body    |
| cg15313226 | 2  | 191,045,668 | 4.75E-09 | 0.503 | 0.434 |          |       |  | <i>C2orf88</i> | 5'UTR   |
| cg00970396 | 16 | 9,107,199   | 3.2E-48  | 0.503 | 0.493 |          |       |  |                |         |
| cg22774088 | 19 | 2,253,398   | 1.56E-31 | 0.502 | 0.478 |          |       |  | <i>JSRP1</i>   | Body    |
| cg23013309 | 12 | 65,218,841  | 1.01E-34 | 0.502 | 0.471 |          |       |  |                |         |
| cg23367107 | 12 | 115,136,287 | 1.9E-21  | 0.502 | 0.495 |          |       |  |                |         |
| cg06457357 | X  | 56,259,243  | 2.55E-21 | 0.502 | 0.458 | 8.15E-24 | 0.284 |  | <i>KLF8</i>    | 5'UTR   |
| cg00349607 | 1  | 39,546,688  | 3.59E-06 | 0.501 | 0.377 |          |       |  | <i>MACF1</i>   | TSS1500 |
| cg06966660 | 10 | 123,923,066 | 3.84E-19 | 0.501 | 0.502 |          |       |  | <i>TACC2</i>   | Body    |
| cg07198194 | 10 | 3,109,053   | 1.81E-30 | 0.500 | 0.503 |          |       |  | <i>PFKP</i>    | TSS1500 |
| cg14619259 | 5  | 141,705,539 | 1.06E-17 | 0.500 | 0.409 |          |       |  | <i>SPRY4</i>   | TSS1500 |
| cg23095615 | 6  | 146,136,563 | 9.34E-08 | 0.500 | 0.373 |          |       |  | <i>FBXO30</i>  | TSS1500 |
| cg04294888 | 22 | 28,839,249  | 1.32E-11 | 0.500 | 0.431 |          |       |  | <i>TTC28</i>   | Body    |
| cg25274503 | 7  | 116,140,128 | 1.76E-24 | 0.500 | 0.493 |          |       |  | <i>CAV2</i>    | Body    |
| cg21899596 | 4  | 57,522,493  | 2.76E-18 | 0.500 | 0.503 |          |       |  | <i>HOPX</i>    | 1stExon |
| cg24605338 | X  | 17,395,856  | 5.53E-78 | 0.499 | 0.496 |          |       |  | <i>NHS</i>     | Body    |
| cg27062326 | X  | 117,629,163 | 5.69E-20 | 0.499 | 0.507 |          |       |  | <i>DOCK11</i>  | TSS1500 |
| cg22074576 | 11 | 3,181,726   | 2.44E-21 | 0.499 | 0.460 |          |       |  | <i>OSBPL5</i>  | 5'UTR   |
| cg00054525 | 16 | 88,717,587  | 7.35E-37 | 0.499 | 0.484 |          |       |  | <i>CYBA</i>    | TSS200  |
| cg01272707 | 6  | 26,172,185  | 0.001258 | 0.499 | 0.567 |          |       |  |                |         |
| cg11022432 | 3  | 125,899,878 | 1.51E-63 | 0.499 | 0.460 |          |       |  | <i>ALDH1L1</i> | TSS1500 |
| cg18844382 | 14 | 23,834,977  | 4.07E-42 | 0.498 | 0.458 |          |       |  | <i>EFS</i>     | TSS200  |
| cg20118643 | 15 | 60,690,852  | 4.52E-51 | 0.498 | 0.460 |          |       |  | <i>ANXA2</i>   | TSS1500 |

|            |    |             |          |       |       |  |  |  |                  |         |
|------------|----|-------------|----------|-------|-------|--|--|--|------------------|---------|
| cg05304177 | 3  | 134,083,080 | 1.3E-23  | 0.498 | 0.528 |  |  |  | <i>AMOTL2</i>    | Body    |
| cg02242344 | 2  | 85,640,943  | 8.35E-13 | 0.498 | 0.450 |  |  |  |                  |         |
| cg02268650 | X  | 68,348,465  | 3.89E-08 | 0.497 | 0.552 |  |  |  |                  |         |
| cg22796860 | 11 | 63,828,346  | 3.39E-75 | 0.497 | 0.510 |  |  |  | <i>MACROD1</i>   | Body    |
| cg17755964 | 1  | 2,461,834   | 1.52E-37 | 0.496 | 0.477 |  |  |  | <i>HES5</i>      | TSS200  |
| cg02590401 | 19 | 48,984,071  | 2.89E-34 | 0.496 | 0.500 |  |  |  | <i>CYTH2</i>     | 3'UTR   |
| cg08535928 | 1  | 246,952,495 | 8.2E-156 | 0.496 | 0.474 |  |  |  | <i>LOC149134</i> | TSS1500 |
| cg01837657 | 15 | 90,039,822  | 5.18E-26 | 0.496 | 0.504 |  |  |  | <i>RHCG</i>      | TSS200  |
| cg04528060 | 4  | 57,371,868  | 3.21E-07 | 0.495 | 0.513 |  |  |  | <i>ARL9</i>      | 5'UTR   |
| cg21883802 | 14 | 92,413,706  | 1.11E-09 | 0.495 | 0.511 |  |  |  | <i>FBLN5</i>     | 5'UTR   |
| cg18516619 | 17 | 78,806,891  | 5.92E-26 | 0.495 | 0.489 |  |  |  | <i>RPTOR</i>     | Body    |
| cg04382470 | 17 | 43,974,975  | 2.67E-46 | 0.495 | 0.460 |  |  |  | <i>MAPT</i>      | 5'UTR   |
| cg16332610 | 15 | 74,658,547  | 9.95E-18 | 0.494 | 0.454 |  |  |  | <i>CYP11A1</i>   | 1stExon |
| cg20430847 | 1  | 2,461,820   | 1.09E-22 | 0.494 | 0.474 |  |  |  | <i>HES5</i>      | TSS200  |
| cg05269938 | 20 | 62,461,294  | 8.7E-37  | 0.494 | 0.504 |  |  |  |                  |         |
| cg08193650 | 2  | 43,451,868  | 5.16E-08 | 0.493 | 0.478 |  |  |  | <i>ZFP36L2</i>   | Body    |
| cg19548479 | 17 | 41,363,737  | 1.19E-18 | 0.493 | 0.468 |  |  |  | <i>TMEM106A</i>  | TSS200  |
| cg09195491 | X  | 56,258,900  | 8.29E-13 | 0.493 | 0.440 |  |  |  | <i>KLF8</i>      | 5'UTR   |
| cg19033654 | 6  | 30,711,138  | 5.31E-24 | 0.492 | 0.489 |  |  |  | <i>IER3</i>      | 3'UTR   |
| cg20172627 | 2  | 25,439,110  | 5.91E-11 | 0.492 | 0.541 |  |  |  |                  |         |
| cg08825929 | 3  | 193,776,240 | 4.37E-08 | 0.492 | 0.434 |  |  |  |                  |         |
| cg23674344 | 17 | 48,503,163  | 8.1E-44  | 0.492 | 0.446 |  |  |  | <i>ACSF2</i>     | TSS1500 |
| cg21013866 | 14 | 23,834,985  | 6.06E-48 | 0.492 | 0.456 |  |  |  | <i>EFS</i>       | TSS200  |
| cg13365334 | X  | 153,598,742 | 3.18E-33 | 0.492 | 0.436 |  |  |  | <i>FLNA</i>      | Body    |
| cg10246531 | 16 | 88,717,628  | 4.01E-41 | 0.491 | 0.475 |  |  |  | <i>CYBA</i>      | TSS200  |
| cg13546240 | 19 | 46,379,991  | 3.46E-23 | 0.491 | 0.478 |  |  |  |                  |         |
| cg14950169 | 12 | 54,145,841  | 1.02E-36 | 0.491 | 0.475 |  |  |  |                  |         |
| cg25858132 | 17 | 1,808,671   | 8.73E-25 | 0.491 | 0.427 |  |  |  |                  |         |
| cg17231999 | 4  | 41,882,564  | 6.81E-05 | 0.490 | 0.456 |  |  |  |                  |         |
| cg11318054 | 7  | 157,361,692 | 1.85E-30 | 0.490 | 0.481 |  |  |  | <i>PTPRN2</i>    | Body    |
| cg05693611 | 6  | 150,263,722 | 4.16E-10 | 0.490 | 0.498 |  |  |  | <i>ULBP2</i>     | Body    |
| cg09974990 | 16 | 67,204,447  | 2.76E-05 | 0.490 | 0.534 |  |  |  |                  |         |
| cg12106728 | 12 | 115,136,258 | 1.66E-13 | 0.490 | 0.486 |  |  |  |                  |         |
| cg03764259 | 7  | 127,176,905 | 5.6E-05  | 0.490 | 0.451 |  |  |  |                  |         |

|            |    |             |          |       |       |          |       |     |                    |         |
|------------|----|-------------|----------|-------|-------|----------|-------|-----|--------------------|---------|
| cg14018731 | 9  | 98,784,336  | 1.47E-05 | 0.490 | 0.316 |          |       |     | <i>NCRNA00092</i>  | TSS1500 |
| cg15083233 | 9  | 112,810,402 | 4.52E-25 | 0.489 | 0.468 | 1.37E-17 | 0.197 |     | <i>PALM2-AKAP2</i> | Body    |
| cg08062049 | 2  | 121,427,380 | 3.85E-09 | 0.489 | 0.458 |          |       |     |                    |         |
| cg22078451 | 5  | 58,335,681  | 6.89E-22 | 0.489 | 0.425 |          |       |     | <i>PDE4D</i>       | Body    |
| cg00409000 | X  | 17,395,816  | 5.99E-09 | 0.489 | 0.516 |          |       |     | <i>NHS</i>         | Body    |
| cg08360726 | 19 | 40,871,823  | 0.000772 | 0.488 | 0.515 |          |       |     | <i>PLD3</i>        | 5'UTR   |
| cg00677574 | 17 | 43,221,327  | 1.9E-35  | 0.488 | 0.449 |          |       |     | <i>ACBD4</i>       | 3'UTR   |
| cg06817490 | 17 | 55,888,548  | 2.99E-25 | 0.488 | 0.505 |          |       |     |                    |         |
| cg00389463 | 19 | 10,397,620  | 6.2E-14  | 0.488 | 0.526 |          |       |     | <i>ICAM4</i>       | TSS200  |
| cg03306374 | 16 | 23,847,325  | 1.02E-11 | 0.488 | 0.471 |          |       |     | <i>PRKCB</i>       | 1stExon |
| cg01364755 | 10 | 1,370,694   | 7.89E-12 | 0.488 | 0.439 |          |       |     | <i>ADARB2</i>      | Body    |
| cg04194494 | 10 | 45,914,450  | 1.17E-17 | 0.487 | 0.443 |          |       |     | <i>ALOX5</i>       | Body    |
| cg09038676 | 11 | 67,351,608  | 2.68E-30 | 0.487 | 0.476 | 3E-29    | 0.283 |     | <i>GSTP1</i>       | Body    |
| cg22590258 | 17 | 61,615,739  | 1.1E-68  | 0.486 | 0.460 |          |       | Yes | <i>KCNH6</i>       | Body    |
| cg06464594 | 18 | 59,560,191  | 1.37E-09 | 0.486 | 0.387 |          |       |     | <i>RNF152</i>      | 1stExon |
| cg02423318 | 7  | 65,509,125  | 0.001965 | 0.486 | 0.433 |          |       |     |                    |         |
| cg16647921 | 4  | 41,867,533  | 2.15E-05 | 0.486 | 0.481 |          |       |     |                    |         |
| cg24029517 | 4  | 11,429,531  | 5.62E-68 | 0.486 | 0.502 |          |       |     | <i>HS3ST1</i>      | 5'UTR   |
| cg19023309 | X  | 106,750,168 | 3.51E-31 | 0.486 | 0.503 |          |       |     |                    |         |
| cg04715503 | 16 | 3,062,795   | 4.28E-15 | 0.486 | 0.485 |          |       |     | <i>CLDN9</i>       | 1stExon |
| cg14993276 | 19 | 10,397,642  | 5.52E-27 | 0.486 | 0.502 |          |       |     | <i>ICAM4</i>       | TSS200  |
| cg17629929 | 5  | 1,875,548   | 9.72E-24 | 0.485 | 0.452 |          |       |     |                    |         |
| cg13123964 | 8  | 38,323,238  | 9.04E-11 | 0.485 | 0.471 |          |       |     | <i>FGFR1</i>       | 5'UTR   |
| cg00264441 | 11 | 57,250,469  | 2.15E-41 | 0.485 | 0.480 |          |       |     |                    |         |
| cg27422872 | 22 | 28,839,137  | 3.18E-12 | 0.485 | 0.426 |          |       |     | <i>TTC28</i>       | Body    |
| cg21981270 | 10 | 45,914,525  | 1.27E-16 | 0.485 | 0.440 |          |       |     | <i>ALOX5</i>       | Body    |
| cg17172980 | 3  | 196,755,973 | 2.8E-15  | 0.485 | 0.438 |          |       |     | <i>MF12</i>        | Body    |
| cg08848774 | 17 | 43,047,733  | 0.000525 | 0.484 | 0.371 |          |       |     |                    |         |
| cg21526205 | 1  | 76,540,574  | 1.78E-20 | 0.484 | 0.459 |          |       |     | <i>ST6GALNAC3</i>  | Body    |
| cg12628196 | 7  | 127,672,458 | 9.2E-193 | 0.484 | 0.485 |          |       |     | <i>SND1</i>        | Body    |
| cg06333058 | 2  | 29,338,077  | 2.26E-07 | 0.484 | 0.365 |          |       |     | <i>CLIP4</i>       | TSS1500 |
| cg19513834 | 2  | 105,470,561 | 4.8E-06  | 0.484 | 0.472 |          |       |     | <i>POU3F3</i>      | TSS1500 |
| cg12799885 | 10 | 74,020,976  | 2E-08    | 0.483 | 0.490 |          |       |     |                    |         |
| cg08781325 | 2  | 26,521,777  | 1.07E-24 | 0.483 | 0.480 |          |       |     |                    |         |

|            |    |             |          |       |       |          |       |     |                 |         |
|------------|----|-------------|----------|-------|-------|----------|-------|-----|-----------------|---------|
| cg01336390 | 6  | 29,895,059  | 9.85E-13 | 0.483 | 0.466 |          |       |     |                 |         |
| cg14151783 | 20 | 44,098,409  | 3.53E-07 | 0.483 | 0.351 |          |       |     | <i>WFDC2</i>    | 1stExon |
| cg06679087 | 10 | 99,473,206  | 8.78E-13 | 0.483 | 0.409 |          |       |     | <i>MARVELD1</i> | TSS1500 |
| cg16831085 | 10 | 45,914,645  | 1.37E-33 | 0.482 | 0.448 |          |       |     | <i>ALOX5</i>    | Body    |
| cg21249376 | 9  | 27,528,432  | 3.03E-84 | 0.482 | 0.462 |          |       |     | <i>MOBKL2B</i>  | 5'UTR   |
| cg23997405 | 14 | 101,033,689 | 8.18E-15 | 0.482 | 0.463 |          |       |     | <i>BEGAIN</i>   | Body    |
| cg06641285 | 17 | 76,921,829  | 3.4E-15  | 0.482 | 0.479 |          |       |     | <i>TIMP2</i>    | TSS1500 |
| cg16771578 | 3  | 125,899,895 | 1.85E-26 | 0.482 | 0.433 |          |       |     | <i>ALDH1L1</i>  | TSS1500 |
| cg14820199 | 4  | 11,429,415  | 6.13E-26 | 0.482 | 0.502 |          |       |     | <i>HS3ST1</i>   | 5'UTR   |
| cg08478709 | 3  | 193,776,092 | 3.54E-27 | 0.481 | 0.469 |          |       |     |                 |         |
| cg20801007 | 11 | 830,320     | 6.76E-06 | 0.481 | 0.528 |          |       |     | <i>EFCAB4A</i>  | Body    |
| cg22671410 | 6  | 29,895,031  | 2.55E-05 | 0.481 | 0.400 |          |       |     |                 |         |
| cg03604011 | 5  | 400,201     | 9.16E-06 | 0.481 | 0.427 |          |       |     | <i>AHRR</i>     | Body    |
| cg05098590 | 10 | 111,767,379 | 4.45E-05 | 0.480 | 0.370 |          |       |     | <i>ADD3</i>     | 5'UTR   |
| cg10292154 | 16 | 27,461,445  | 9.66E-20 | 0.480 | 0.476 |          |       |     | <i>IL21R</i>    | 3'UTR   |
| cg06385187 | 20 | 44,098,287  | 7.35E-05 | 0.480 | 0.317 |          |       |     | <i>WFDC2</i>    | TSS200  |
| cg02131967 | 17 | 61,554,106  | 2.05E-30 | 0.480 | 0.444 | 3.73E-25 | 0.274 |     | <i>ACE</i>      | TSS1500 |
| cg25032595 | 13 | 96,204,978  | 1.18E-19 | 0.480 | 0.471 |          |       |     | <i>CLDN10</i>   | 5'UTR   |
| cg04978107 | 14 | 24,458,000  | 4.3E-105 | 0.480 | 0.475 |          |       |     | <i>DHRS4L2</i>  | TSS200  |
| cg00604840 | 5  | 154,230,173 | 1.61E-34 | 0.479 | 0.454 |          |       |     | <i>C5orf4</i>   | 5'UTR   |
| cg09486902 | 12 | 65,219,478  | 5.5E-99  | 0.479 | 0.470 |          |       |     |                 |         |
| cg21229570 | 12 | 115,124,768 | 9.19E-10 | 0.479 | 0.440 |          |       |     |                 |         |
| cg04920951 | 11 | 67,351,271  | 1.04E-23 | 0.479 | 0.493 | 3.61E-28 | 0.309 |     | <i>GSTP1</i>    | 1stExon |
| cg19859290 | 11 | 20,618,399  | 6.1E-06  | 0.479 | 0.324 |          |       |     |                 |         |
| cg02534163 | 8  | 120,650,994 | 0.000167 | 0.479 | 0.462 |          |       |     | <i>ENPP2</i>    | 1stExon |
| cg05971966 | 5  | 40,681,137  | 9.3E-26  | 0.479 | 0.493 |          |       |     | <i>PTGER4</i>   | Body    |
| cg21770622 | 11 | 46,383,066  | 5.73E-48 | 0.478 | 0.489 |          |       |     | <i>DGKZ</i>     | Body    |
| cg20899354 | 3  | 25,469,392  | 7.08E-17 | 0.478 | 0.448 |          |       |     | <i>RARB</i>     | TSS1500 |
| cg15026277 | 17 | 41,363,789  | 1.5E-12  | 0.478 | 0.455 |          |       |     | <i>TMEM106A</i> | TSS200  |
| cg00402172 | 16 | 68,118,754  | 1.91E-94 | 0.477 | 0.461 |          |       |     | <i>NFATC3</i>   | TSS1500 |
| cg24691910 | 12 | 115,132,460 | 8.47E-14 | 0.477 | 0.484 |          |       | Yes |                 |         |
| cg07671805 | 5  | 74,907,694  | 2.88E-21 | 0.477 | 0.420 |          |       |     |                 |         |
| cg01740766 | 6  | 44,528,958  | 9.48E-33 | 0.477 | 0.414 |          |       |     |                 |         |
| cg05559795 | X  | 56,258,812  | 1.84E-08 | 0.476 | 0.400 |          |       |     | <i>KLF8</i>     | TSS200  |



|            |    |             |          |       |       |          |       |     |                 |         |
|------------|----|-------------|----------|-------|-------|----------|-------|-----|-----------------|---------|
| cg22262168 | 9  | 27,528,999  | 2.03E-17 | 0.476 | 0.434 | 3.36E-34 | 0.373 |     | <i>MOBK2B</i>   | 5'UTR   |
| cg25386707 | 10 | 131,748,428 | 2.03E-22 | 0.476 | 0.489 |          |       |     | <i>EBF3</i>     | Body    |
| cg03942855 | 1  | 110,210,925 | 5.59E-38 | 0.476 | 0.424 |          |       |     | <i>GSTM2</i>    | Body    |
| cg06766427 | 17 | 12,877,546  | 2.5E-06  | 0.476 | 0.319 |          |       |     | <i>RICH2</i>    | Body    |
| cg18188717 | 5  | 154,230,223 | 1.57E-27 | 0.475 | 0.464 |          |       |     | <i>C5orf4</i>   | TSS200  |
| cg25214789 | 5  | 7,850,070   | 6.75E-13 | 0.475 | 0.476 |          |       |     | <i>C5orf49</i>  | Body    |
| cg05385513 | 2  | 56,150,478  | 3.59E-22 | 0.475 | 0.449 |          |       |     | <i>EFEMP1</i>   | TSS200  |
| cg17643864 | 8  | 56,852,148  | 3.34E-46 | 0.475 | 0.461 |          |       |     | <i>LYN</i>      | 5'UTR   |
| cg03457729 | 15 | 89,953,295  | 7.85E-34 | 0.474 | 0.464 |          |       |     |                 |         |
| cg05133205 | 6  | 32,121,249  | 1.06E-26 | 0.474 | 0.495 |          |       |     | <i>PPT2</i>     | TSS200  |
| cg00040312 | 12 | 54,424,679  | 6.42E-08 | 0.474 | 0.415 |          |       |     | <i>HOXC4</i>    | 5'UTR   |
| cg13782615 | 11 | 4,079,556   | 1.86E-21 | 0.474 | 0.478 |          |       |     | <i>STIM1</i>    | Body    |
| cg13670316 | 9  | 78,507,533  | 5.42E-19 | 0.474 | 0.472 |          |       |     | <i>PCSK5</i>    | Body    |
| cg01532436 | 19 | 48,983,942  | 7.56E-20 | 0.474 | 0.482 |          |       |     | <i>CYTH2</i>    | 3'UTR   |
| cg09248054 | 1  | 969,257     | 6.45E-08 | 0.474 | 0.503 |          |       |     | <i>AGRN</i>     | Body    |
| cg11348442 | 2  | 220,117,784 | 1.84E-35 | 0.473 | 0.494 |          |       |     | <i>TUBA4B</i>   | TSS200  |
| cg25307318 | 10 | 123,923,081 | 1.9E-30  | 0.473 | 0.439 |          |       |     | <i>TACC2</i>    | Body    |
| cg10593416 | X  | 106,750,120 | 4.04E-25 | 0.473 | 0.454 |          |       |     |                 |         |
| cg11332236 | 15 | 90,039,818  | 6.6E-21  | 0.473 | 0.490 |          |       |     | <i>RHCG</i>     | TSS200  |
| cg22212414 | 21 | 34,775,032  | 0.010507 | 0.472 | 0.293 |          |       |     | <i>IFNGR2</i>   | TSS200  |
| cg07188523 | 6  | 44,528,793  | 7.38E-30 | 0.472 | 0.453 |          |       |     |                 |         |
| cg06361405 | 10 | 104,434,010 | 6.52E-31 | 0.472 | 0.456 |          |       |     | <i>ARL3</i>     | 3'UTR   |
| cg11916729 | 5  | 180,018,564 | 7.1E-109 | 0.472 | 0.469 |          |       |     | <i>SCGB3A1</i>  | TSS200  |
| cg07153010 | 22 | 21,312,388  | 9.36E-14 | 0.472 | 0.371 |          |       |     |                 |         |
| cg12564567 | 11 | 116,371,188 | 6.32E-11 | 0.472 | 0.451 |          |       |     |                 |         |
| cg11424456 | 17 | 1,131,878   | 7.72E-17 | 0.472 | 0.446 |          |       |     |                 |         |
| cg00397479 | 6  | 31,831,510  | 3.53E-47 | 0.472 | 0.447 |          |       |     | <i>NEU1</i>     | TSS1500 |
| cg14621217 | 17 | 80,944,134  | 4.8E-26  | 0.471 | 0.422 |          |       |     | <i>B3GNTL1</i>  | Body    |
| cg11280661 | 3  | 61,549,475  | 6.02E-47 | 0.471 | 0.451 |          |       | Yes | <i>PTPRG</i>    | Body    |
| cg06998282 | 8  | 120,651,398 | 1.66E-15 | 0.471 | 0.466 |          |       |     | <i>ENPP2</i>    | TSS1500 |
| cg10706230 | 1  | 25,944,514  | 6.5E-13  | 0.471 | 0.433 |          |       |     | <i>MAN1C1</i>   | 1stExon |
| cg20449590 | 1  | 146,551,201 | 2.25E-20 | 0.471 | 0.483 |          |       |     |                 |         |
| cg10747118 | 3  | 184,243,718 | 0.001302 | 0.470 | 0.312 |          |       |     |                 |         |
| cg07635623 | 6  | 2,841,875   | 1E-08    | 0.470 | 0.400 |          |       |     | <i>SERPINB1</i> | 5'UTR   |

|            |    |             |          |       |       |          |       |     |                 |         |
|------------|----|-------------|----------|-------|-------|----------|-------|-----|-----------------|---------|
| cg24008544 | 17 | 41,363,899  | 6.59E-30 | 0.470 | 0.446 |          |       |     | <i>TMEM106A</i> | 5'UTR   |
| cg16493531 | 6  | 30,711,802  | 4.81E-15 | 0.470 | 0.512 |          |       |     | <i>FLOT1</i>    | TSS1500 |
| cg01940855 | 12 | 104,852,355 | 4.32E-37 | 0.470 | 0.426 |          |       |     | <i>CHST11</i>   | Body    |
| cg09691340 | 17 | 42,402,882  | 2.09E-05 | 0.470 | 0.432 |          |       |     | <i>SLC25A39</i> | TSS1500 |
| cg14564616 | 5  | 1,876,337   | 2.33E-12 | 0.470 | 0.406 |          |       |     |                 |         |
| cg03610137 | X  | 56,259,040  | 1.62E-11 | 0.470 | 0.446 |          |       |     | <i>KLF8</i>     | 5'UTR   |
| cg22502206 | 15 | 60,690,826  | 8.52E-43 | 0.470 | 0.430 |          |       |     | <i>ANXA2</i>    | TSS1500 |
| cg03103218 | 11 | 63,828,672  | 5.88E-31 | 0.470 | 0.453 |          |       |     | <i>MACROD1</i>  | Body    |
| cg19617897 | 15 | 71,818,628  | 7.51E-14 | 0.469 | 0.485 |          |       |     | <i>THSD4</i>    | Body    |
| cg02373152 | 6  | 52,227,767  | 3E-22    | 0.469 | 0.443 |          |       |     | <i>PAQR8</i>    | 5'UTR   |
| cg21211480 | 17 | 41,363,774  | 2.33E-15 | 0.468 | 0.436 |          |       |     | <i>TMEM106A</i> | TSS200  |
| cg26375284 | 6  | 29,855,401  | 3.84E-07 | 0.468 | 0.435 |          |       | Yes | <i>HLA-H</i>    | Body    |
| cg11146691 | 12 | 47,219,737  | 1.92E-13 | 0.468 | 0.438 |          |       |     | <i>SLC38A4</i>  | 1stExon |
| cg08066035 | 19 | 16,999,614  | 5.68E-05 | 0.468 | 0.493 |          |       |     | <i>F2RL3</i>    | TSS1500 |
| cg03576469 | 19 | 46,917,061  | 7.15E-23 | 0.468 | 0.434 |          |       |     | <i>CCDC8</i>    | TSS200  |
| cg26452868 | 10 | 57,387,715  | 7.56E-07 | 0.468 | 0.525 |          |       |     |                 |         |
| cg11610350 | 3  | 64,253,705  | 1.73E-55 | 0.468 | 0.471 |          |       |     |                 |         |
| cg05829338 | X  | 106,750,612 | 1.24E-18 | 0.468 | 0.474 |          |       |     |                 |         |
| cg08812897 | X  | 20,286,243  | 2.7E-101 | 0.467 | 0.452 |          |       |     | <i>RPS6KA3</i>  | TSS1500 |
| cg26124016 | 3  | 25,469,402  | 6.81E-25 | 0.467 | 0.434 | 1.61E-27 | 0.331 |     | <i>RARB</i>     | TSS1500 |
| cg25587069 | 5  | 151,066,484 | 5E-115   | 0.467 | 0.454 |          |       |     | <i>SPARC</i>    | 1stExon |
| cg03004714 | 18 | 59,560,365  | 1.57E-06 | 0.467 | 0.361 |          |       |     | <i>RNF152</i>   | TSS200  |
| cg05154698 | 1  | 26,202,441  | 9.59E-05 | 0.467 | 0.339 |          |       |     |                 |         |
| cg21244846 | 9  | 27,529,339  | 0.000239 | 0.466 | 0.321 |          |       |     | <i>MOBKL2B</i>  | 5'UTR   |
| cg03125427 | 16 | 88,717,482  | 5.7E-05  | 0.466 | 0.493 |          |       |     | <i>CYBA</i>     | TSS200  |
| cg15657686 | 4  | 37,978,666  | 2.72E-42 | 0.466 | 0.445 |          |       |     | <i>TBC1D1</i>   | Body    |
| cg27519622 | 16 | 3,079,877   | 7.49E-49 | 0.466 | 0.471 |          |       |     | <i>CCDC64B</i>  | Body    |
| cg12162377 | 2  | 232,261,007 | 4.26E-16 | 0.466 | 0.461 |          |       |     | <i>B3GNT7</i>   | Body    |
| cg00498024 | 19 | 41,934,170  | 5.52E-16 | 0.466 | 0.499 |          |       |     | <i>B3GNT8</i>   | 5'UTR   |
| cg27232866 | 1  | 43,251,073  | 2.89E-15 | 0.466 | 0.434 |          |       |     |                 |         |
| cg08177833 | 16 | 88,717,537  | 1.9E-35  | 0.466 | 0.477 |          |       |     | <i>CYBA</i>     | TSS200  |
| cg00672333 | 17 | 36,728,456  | 1.06E-24 | 0.466 | 0.420 |          |       |     | <i>SRCIN1</i>   | Body    |
| cg05063999 | 3  | 64,253,605  | 2.37E-36 | 0.466 | 0.463 |          |       |     |                 |         |
| cg08104202 | 1  | 169,396,712 | 1.29E-08 | 0.466 | 0.431 |          |       |     | <i>C1orf114</i> | TSS200  |

|            |    |             |          |       |       |          |       |  |                  |         |
|------------|----|-------------|----------|-------|-------|----------|-------|--|------------------|---------|
| cg07589773 | 7  | 50,343,883  | 2.72E-43 | 0.465 | 0.477 |          |       |  | <i>IKZF1</i>     | TSS1500 |
| cg10155432 | 7  | 1,293,933   | 6.74E-52 | 0.465 | 0.455 |          |       |  |                  |         |
| cg27071152 | 7  | 39,649,443  | 8.37E-06 | 0.465 | 0.411 |          |       |  | <i>LOC646999</i> | Body    |
| cg18638914 | 4  | 779,568     | 6.57E-37 | 0.465 | 0.443 |          |       |  | <i>CPLX1</i>     | 3'UTR   |
| cg12080909 | 17 | 27,917,982  | 1.31E-42 | 0.465 | 0.461 |          |       |  | <i>GIT1</i>      | TSS1500 |
| cg02383154 | 17 | 53,343,283  | 6.09E-69 | 0.465 | 0.437 |          |       |  | <i>HLF</i>       | Body    |
| cg01367393 | 15 | 89,438,731  | 2.5E-10  | 0.464 | 0.437 |          |       |  | <i>HAPLN3</i>    | 5'UTR   |
| cg07937925 | 17 | 15,820,699  | 3.58E-19 | 0.464 | 0.404 |          |       |  |                  |         |
| cg04986616 | 11 | 63,537,378  | 1.21E-30 | 0.464 | 0.440 |          |       |  | <i>C11orf95</i>  | TSS1500 |
| cg22878441 | 3  | 159,756,648 | 1.7E-17  | 0.464 | 0.487 |          |       |  |                  |         |
| cg05744675 | 16 | 88,717,723  | 1.42E-23 | 0.464 | 0.457 |          |       |  | <i>CYBA</i>      | TSS1500 |
| cg13181974 | 15 | 37,389,489  | 0.000529 | 0.464 | 0.583 |          |       |  | <i>MEIS2</i>     | Body    |
| cg25943872 | X  | 73,642,385  | 9.69E-17 | 0.463 | 0.404 |          |       |  | <i>SLC16A2</i>   | Body    |
| cg23818870 | 1  | 169,396,785 | 4.4E-14  | 0.463 | 0.442 |          |       |  | <i>C1orf114</i>  | TSS200  |
| cg11026555 | 12 | 124,247,223 | 5.82E-05 | 0.463 | 0.246 |          |       |  | <i>DNAH10</i>    | Body    |
| cg00113675 | 6  | 29,855,347  | 1.21E-24 | 0.463 | 0.426 |          |       |  | <i>HLA-H</i>     | TSS200  |
| cg16836311 | 1  | 25,944,712  | 2.08E-30 | 0.463 | 0.425 |          |       |  | <i>MAN1C1</i>    | 1stExon |
| cg17195771 | 9  | 71,789,541  | 3.53E-43 | 0.463 | 0.445 |          |       |  | <i>TJP2</i>      | Body    |
| cg13390867 | 9  | 86,717,438  | 2.97E-13 | 0.463 | 0.453 |          |       |  |                  |         |
| cg15071854 | 1  | 45,792,688  | 0.000168 | 0.463 | 0.462 |          |       |  | <i>HPDL</i>      | 1stExon |
| cg25548414 | X  | 130,192,160 | 0.000131 | 0.463 | 0.427 |          |       |  | <i>FLJ30058</i>  | TSS200  |
| cg22538054 | 12 | 95,941,988  | 8.63E-11 | 0.462 | 0.399 |          |       |  | <i>USP44</i>     | 5'UTR   |
| cg14287235 | 14 | 24,804,339  | 3.91E-10 | 0.462 | 0.485 |          |       |  | <i>ADCY4</i>     | TSS1500 |
| cg14142965 | 12 | 104,609,432 | 2.59E-12 | 0.462 | 0.439 |          |       |  | <i>TXNRD1</i>    | TSS200  |
| cg09094393 | 6  | 146,136,749 | 9.12E-08 | 0.462 | 0.397 |          |       |  | <i>FBXO30</i>    | TSS1500 |
| cg13387113 | 17 | 74,696,737  | 2.66E-32 | 0.462 | 0.430 |          |       |  | <i>MXRA7</i>     | Body    |
| cg22806907 | 17 | 40,826,212  | 7.35E-12 | 0.462 | 0.453 |          |       |  | <i>PLEKHH3</i>   | Body    |
| cg17633020 | 5  | 58,335,180  | 2.03E-53 | 0.462 | 0.435 |          |       |  | <i>PDE4D</i>     | Body    |
| cg21919857 | 5  | 180,018,102 | 9.44E-11 | 0.462 | 0.424 |          |       |  | <i>SCGB3A1</i>   | Body    |
| cg00400221 | 8  | 38,323,291  | 4.02E-10 | 0.462 | 0.446 |          |       |  | <i>FGFR1</i>     | 5'UTR   |
| cg26654286 | 17 | 38,465,510  | 2.96E-14 | 0.462 | 0.467 |          |       |  | <i>RARA</i>      | 5'UTR   |
| cg08348496 | 15 | 89,438,671  | 8.59E-05 | 0.462 | 0.439 | 4.68E-21 | 0.279 |  | <i>HAPLN3</i>    | 5'UTR   |
| cg11444704 | 5  | 159,738,916 | 4.66E-10 | 0.462 | 0.456 |          |       |  | <i>CCNJL</i>     | Body    |
| cg04156293 | 7  | 100,488,942 | 4.28E-07 | 0.462 | 0.507 |          |       |  | <i>ACHE</i>      | Body    |

|            |    |             |          |       |       |          |       |  |                  |         |
|------------|----|-------------|----------|-------|-------|----------|-------|--|------------------|---------|
| cg24117274 | 1  | 21,945,805  | 5.89E-31 | 0.462 | 0.421 |          |       |  | <i>RAP1GAP</i>   | Body    |
| cg16955726 | X  | 134,125,259 | 7.37E-08 | 0.462 | 0.457 |          |       |  | <i>LOC644538</i> | 1stExon |
| cg22027897 | 17 | 60,885,856  | 2.15E-26 | 0.462 | 0.400 |          |       |  | <i>MARCH10</i>   | TSS200  |
| cg19241327 | 7  | 157,484,559 | 4.1E-70  | 0.462 | 0.469 |          |       |  | <i>PTPRN2</i>    | Body    |
| cg25714826 | 16 | 85,784,062  | 3.36E-18 | 0.461 | 0.374 |          |       |  | <i>C16orf74</i>  | 5'UTR   |
| cg11606461 | 5  | 112,629,604 | 0.000305 | 0.461 | 0.368 |          |       |  | <i>MCC</i>       | Body    |
| cg24808280 | 1  | 169,396,868 | 8.72E-31 | 0.461 | 0.441 |          |       |  | <i>C1orf114</i>  | TSS200  |
| cg01514828 | 17 | 36,715,074  | 2.83E-10 | 0.461 | 0.385 |          |       |  | <i>SRCIN1</i>    | Body    |
| cg09777525 | 17 | 74,965,708  | 3.03E-06 | 0.461 | 0.310 |          |       |  |                  |         |
| cg23083315 | 11 | 35,639,656  | 0.000283 | 0.461 | 0.368 |          |       |  | <i>FJX1</i>      | TSS200  |
| cg11739675 | 12 | 104,852,151 | 6.85E-12 | 0.461 | 0.400 |          |       |  | <i>CHST11</i>    | Body    |
| cg12070159 | 8  | 54,789,325  | 2.45E-24 | 0.461 | 0.439 |          |       |  | <i>RGS20</i>     | Body    |
| cg08498787 | 11 | 57,250,780  | 5.33E-33 | 0.461 | 0.458 |          |       |  |                  |         |
| cg25247183 | 22 | 38,073,049  | 6.25E-08 | 0.461 | 0.463 |          |       |  | <i>LGALS1</i>    | Body    |
| cg06839900 | 1  | 2,461,900   | 4.93E-74 | 0.461 | 0.444 |          |       |  | <i>HES5</i>      | TSS1500 |
| cg20399616 | 12 | 25,055,967  | 0.00074  | 0.461 | 0.438 |          |       |  | <i>BCAT1</i>     | Body    |
| cg18572413 | 2  | 233,741,639 | 5.85E-29 | 0.460 | 0.396 |          |       |  |                  |         |
| cg11009590 | 6  | 149,082,648 | 1.57E-26 | 0.460 | 0.393 |          |       |  | <i>UST</i>       | Body    |
| cg22758700 | 7  | 99,156,126  | 8.5E-05  | 0.460 | 0.334 |          |       |  | <i>ZNF655</i>    | TSS1500 |
| cg08047907 | 1  | 169,396,858 | 1.01E-18 | 0.460 | 0.441 | 3.89E-24 | 0.247 |  | <i>C1orf114</i>  | TSS200  |
| cg20384898 | 6  | 1,625,111   | 5.02E-21 | 0.460 | 0.444 |          |       |  | <i>GMDS</i>      | Body    |
| cg08763705 | 5  | 139,525,657 | 0.00035  | 0.460 | 0.364 |          |       |  |                  |         |
| cg16556145 | 13 | 96,205,184  | 1.14E-35 | 0.460 | 0.446 |          |       |  | <i>CLDN10</i>    | 1stExon |
| cg04178787 | 2  | 123,418,787 | 3.43E-37 | 0.460 | 0.453 |          |       |  |                  |         |
| cg05019905 | 6  | 29,894,831  | 9.13E-11 | 0.460 | 0.450 |          |       |  | <i>HCG4P6</i>    | TSS1500 |
| cg17395064 | 12 | 104,609,476 | 1.02E-11 | 0.460 | 0.437 |          |       |  | <i>TXNRD1</i>    | TSS200  |
| cg25464921 | 1  | 169,429,698 | 7.58E-11 | 0.460 | 0.457 |          |       |  |                  |         |
| cg07980518 | 18 | 59,560,394  | 1.36E-10 | 0.460 | 0.361 | 1.43E-22 | 0.201 |  | <i>RNF152</i>    | TSS200  |
| cg23146663 | 5  | 151,066,662 | 8.76E-27 | 0.460 | 0.452 |          |       |  | <i>SPARC</i>     | TSS200  |
| cg00073010 | 17 | 17,627,194  | 9.99E-35 | 0.459 | 0.462 |          |       |  | <i>RAI1</i>      | 5'UTR   |
| cg04203238 | 4  | 16,085,702  | 1.5E-37  | 0.459 | 0.449 |          |       |  | <i>PROM1</i>     | TSS200  |
| cg04573276 | 11 | 35,639,632  | 2.12E-09 | 0.459 | 0.374 |          |       |  | <i>FJX1</i>      | TSS200  |
| cg21026663 | 6  | 26,189,234  | 8.22E-05 | 0.458 | 0.444 | 1.46E-19 | 0.243 |  | <i>HIST1H4D</i>  | 1stExon |
| cg01834022 | 4  | 5,710,411   | 1.52E-05 | 0.458 | 0.360 |          |       |  | <i>EVC2</i>      | 5'UTR   |

|            |    |             |          |       |       |          |       |     |                 |         |
|------------|----|-------------|----------|-------|-------|----------|-------|-----|-----------------|---------|
| cg08640923 | 2  | 220,117,945 | 4.33E-08 | 0.458 | 0.486 |          |       |     | <i>TUBA4B</i>   | TSS200  |
| cg18960629 | 17 | 36,585,452  | 2.33E-35 | 0.458 | 0.451 |          |       |     |                 |         |
| cg12178578 | 1  | 45,792,714  | 2.98E-05 | 0.458 | 0.442 |          |       |     | <i>HPDL</i>     | 1stExon |
| cg16215203 | 14 | 24,803,917  | 3.34E-05 | 0.458 | 0.468 |          |       |     | <i>ADCY4</i>    | TSS200  |
| cg07434284 | 4  | 779,691     | 2.36E-26 | 0.458 | 0.438 |          |       |     | <i>CPLX1</i>    | 3'UTR   |
| cg02499249 | 3  | 25,469,720  | 1.49E-41 | 0.458 | 0.444 | 8.17E-28 | 0.271 |     | <i>RARB</i>     | TSS200  |
| cg03217795 | 16 | 23,847,556  | 5.49E-18 | 0.458 | 0.402 |          |       |     | <i>PRKCB</i>    | 1stExon |
| cg00480331 | 3  | 187,455,371 | 1.3E-12  | 0.457 | 0.446 |          |       |     | <i>BCL6</i>     | 5'UTR   |
| cg00157477 | 6  | 29,855,473  | 1.66E-25 | 0.457 | 0.432 |          |       |     | <i>HLA-H</i>    | Body    |
| cg16999254 | 10 | 86,016,931  | 4.19E-08 | 0.457 | 0.387 |          |       |     | <i>RGR</i>      | Body    |
| cg16317273 | 5  | 38,258,028  | 1.69E-06 | 0.457 | 0.411 |          |       |     | <i>EGFLAM</i>   | TSS1500 |
| cg03317517 | 19 | 20,188,803  | 7.38E-12 | 0.456 | 0.357 |          |       |     | <i>ZNF90</i>    | 1stExon |
| cg15356923 | 3  | 68,981,011  | 1.32E-11 | 0.456 | 0.447 |          |       |     | <i>FAM19A4</i>  | 5'UTR   |
| cg03959186 | 2  | 9,893,528   | 1.94E-19 | 0.456 | 0.412 |          |       | Yes |                 |         |
| cg14711997 | 7  | 150,652,864 | 6.87E-26 | 0.456 | 0.453 |          |       |     | <i>KCNH2</i>    | 5'UTR   |
| cg19790294 | 16 | 88,717,755  | 5.95E-38 | 0.456 | 0.440 | 3.96E-41 | 0.296 |     | <i>CYBA</i>     | TSS1500 |
| cg26371731 | 1  | 156,390,240 | 4.64E-10 | 0.455 | 0.509 |          |       |     | <i>MIR9-1</i>   | TSS200  |
| cg06532037 | 2  | 191,045,430 | 0.000202 | 0.455 | 0.439 |          |       |     | <i>C2orf88</i>  | 5'UTR   |
| cg18257814 | 2  | 55,646,430  | 4.94E-05 | 0.455 | 0.278 |          |       |     | <i>CCDC88A</i>  | 5'UTR   |
| cg16419441 | 8  | 105,478,683 | 1.5E-33  | 0.455 | 0.460 |          |       |     | <i>DPYS</i>     | Body    |
| cg10187879 | 6  | 32,223,208  | 2.31E-16 | 0.455 | 0.453 |          |       |     |                 |         |
| cg05613116 | 2  | 27,958,722  | 2.36E-22 | 0.455 | 0.385 |          |       |     |                 |         |
| cg11660826 | 6  | 150,286,508 | 3.22E-25 | 0.455 | 0.424 |          |       |     | <i>ULBP1</i>    | Body    |
| cg25561140 | 12 | 120,799,725 | 3.28E-39 | 0.455 | 0.446 |          |       |     | <i>MSI1</i>     | Body    |
| cg05947181 | X  | 50,557,283  | 9.76E-06 | 0.455 | 0.510 |          |       |     | <i>SHROOM4</i>  | TSS1500 |
| cg20060685 | 12 | 106,533,898 | 2.56E-41 | 0.455 | 0.454 |          |       |     | <i>NUAK1</i>    | TSS200  |
| cg22003435 | 2  | 191,045,885 | 1.46E-13 | 0.455 | 0.380 |          |       |     | <i>C2orf88</i>  | 5'UTR   |
| cg27299406 | 2  | 43,020,013  | 1.27E-08 | 0.455 | 0.309 |          |       |     | <i>HAAO</i>     | TSS1500 |
| cg06206801 | 18 | 24,131,379  | 7.83E-28 | 0.454 | 0.422 |          |       |     | <i>KCTD1</i>    | 5'UTR   |
| cg18331855 | 17 | 1,131,781   | 8.71E-13 | 0.454 | 0.436 |          |       |     |                 |         |
| cg01708411 | 12 | 57,631,839  | 4.01E-11 | 0.454 | 0.431 |          |       |     | <i>NDUFA4L2</i> | 5'UTR   |
| cg25258879 | X  | 49,022,996  | 8.2E-10  | 0.454 | 0.391 |          |       |     | <i>MAGIX</i>    | 3'UTR   |
| cg00179217 | 6  | 31,831,340  | 6.13E-41 | 0.454 | 0.432 |          |       |     | <i>SLC44A4</i>  | 3'UTR   |
| cg03344031 | 19 | 50,706,387  | 5.4E-05  | 0.454 | 0.290 |          |       |     | <i>MYH14</i>    | TSS1500 |

|            |    |             |          |       |       |          |       |     |  |                 |         |
|------------|----|-------------|----------|-------|-------|----------|-------|-----|--|-----------------|---------|
| cg25556905 | 14 | 24,803,925  | 0.000194 | 0.454 | 0.473 |          |       |     |  | <i>ADCY4</i>    | TSS200  |
| cg02386420 | 17 | 78,806,870  | 7.38E-20 | 0.454 | 0.450 |          |       |     |  | <i>RPTOR</i>    | Body    |
| cg09087503 | 7  | 127,672,473 | 4.4E-117 | 0.454 | 0.458 |          |       |     |  | <i>SND1</i>     | Body    |
| cg10224600 | 17 | 43,975,063  | 1.72E-24 | 0.454 | 0.454 |          |       |     |  | <i>MAPT</i>     | 5'UTR   |
| cg10262387 | 6  | 29,855,435  | 6.22E-17 | 0.453 | 0.424 |          |       |     |  | <i>HLA-H</i>    | Body    |
| cg05562381 | 17 | 8,230,350   | 2.31E-07 | 0.453 | 0.381 |          |       |     |  |                 |         |
| cg10626816 | 1  | 39,025,249  | 1.13E-06 | 0.453 | 0.430 |          |       |     |  |                 |         |
| cg23780110 | 2  | 26,045,244  | 1.87E-23 | 0.453 | 0.445 |          |       |     |  | <i>ASXL2</i>    | Body    |
| cg26071526 | 10 | 123,923,273 | 1.32E-39 | 0.453 | 0.447 |          |       |     |  | <i>TACC2</i>    | Body    |
| cg12479047 | 3  | 25,469,573  | 5.3E-21  | 0.453 | 0.421 |          |       |     |  | <i>RARB</i>     | TSS1500 |
| cg19846667 | 14 | 22,191,856  | 3.23E-38 | 0.453 | 0.457 |          |       |     |  |                 |         |
| cg06428055 | X  | 129,243,872 | 9.54E-17 | 0.453 | 0.447 | 1.56E-31 | 0.339 |     |  | <i>ELF4</i>     | 5'UTR   |
| cg25311637 | 1  | 146,556,000 | 3.58E-10 | 0.453 | 0.391 |          |       | Yes |  |                 |         |
| cg11448068 | 2  | 191,045,026 | 4.14E-44 | 0.453 | 0.445 |          |       |     |  | <i>C2orf88</i>  | TSS1500 |
| cg13727849 | 17 | 72,210,343  | 1.25E-26 | 0.453 | 0.435 |          |       |     |  | <i>MGC16275</i> | TSS1500 |
| cg06405186 | 11 | 61,283,968  | 3.14E-43 | 0.453 | 0.438 |          |       |     |  | <i>SYT7</i>     | 3'UTR   |
| cg15472092 | 7  | 150,653,079 | 1.48E-14 | 0.452 | 0.423 |          |       |     |  | <i>KCNH2</i>    | TSS200  |
| cg08513472 | 6  | 1,625,238   | 8.41E-63 | 0.452 | 0.433 |          |       |     |  | <i>GMDS</i>     | Body    |
| cg06301550 | 20 | 37,230,484  | 5.32E-31 | 0.452 | 0.449 |          |       |     |  | <i>C20orf95</i> | TSS200  |
| cg00778807 | 1  | 43,524,347  | 2.3E-14  | 0.452 | 0.466 |          |       |     |  |                 |         |
| cg09953499 | 19 | 51,416,202  | 1.57E-21 | 0.452 | 0.411 |          |       |     |  |                 |         |
| cg24519393 | 1  | 38,470,540  | 2.83E-40 | 0.452 | 0.400 |          |       |     |  | <i>FHL3</i>     | 5'UTR   |
| cg05402599 | 2  | 219,846,796 | 4.54E-41 | 0.452 | 0.447 |          |       |     |  | <i>FEV</i>      | Body    |
| cg22750044 | X  | 73,642,662  | 1.88E-21 | 0.452 | 0.401 |          |       |     |  | <i>SLC16A2</i>  | Body    |
| cg24492202 | 4  | 2,802,612   | 2.28E-29 | 0.452 | 0.429 |          |       |     |  | <i>SH3BP2</i>   | 5'UTR   |
| cg08979352 | 4  | 99,580,530  | 1.52E-05 | 0.452 | 0.488 |          |       |     |  | <i>TSPAN5</i>   | TSS1500 |
| cg15467646 | 1  | 22,141,014  | 1.48E-61 | 0.452 | 0.426 |          |       |     |  | <i>LDLRAD2</i>  | Body    |
| cg10002178 | 14 | 94,254,726  | 0.013876 | 0.451 | 0.197 |          |       |     |  | <i>PRIMA1</i>   | 5'UTR   |
| cg16818740 | 20 | 4,803,300   | 8.21E-45 | 0.451 | 0.415 |          |       |     |  | <i>RASSF2</i>   | 5'UTR   |
| cg10286969 | 16 | 2,765,843   | 1.18E-17 | 0.451 | 0.452 |          |       |     |  | <i>PRSS27</i>   | Body    |
| cg04704531 | 12 | 54,409,491  | 2.79E-05 | 0.451 | 0.434 |          |       |     |  | <i>HOXC4</i>    | TSS1500 |
| cg07564962 | 5  | 139,076,670 | 2.82E-53 | 0.451 | 0.449 |          |       |     |  |                 |         |
| cg11199810 | 1  | 150,123,146 | 0.00021  | 0.451 | 0.313 |          |       |     |  | <i>PLEKHO1</i>  | Body    |
| cg15266705 | 12 | 115,136,096 | 7.32E-14 | 0.451 | 0.441 |          |       |     |  |                 |         |

|            |    |             |          |       |       |  |  |  |                     |         |
|------------|----|-------------|----------|-------|-------|--|--|--|---------------------|---------|
| cg13150171 | 1  | 41,326,892  | 4.03E-18 | 0.451 | 0.453 |  |  |  | <i>CITED4</i>       | 3'UTR   |
| cg07906520 | 20 | 37,435,716  | 6.31E-11 | 0.451 | 0.423 |  |  |  | <i>PPP1R16B</i>     | 5'UTR   |
| cg09841842 | 14 | 51,974,848  | 2.37E-31 | 0.451 | 0.464 |  |  |  | <i>FRMD6</i>        | 5'UTR   |
| cg06769296 | 11 | 133,906,761 | 1.9E-46  | 0.450 | 0.434 |  |  |  | <i>LOC100128239</i> | Body    |
| cg25191041 | 21 | 44,782,470  | 9.28E-47 | 0.450 | 0.432 |  |  |  |                     |         |
| cg00722320 | 15 | 79,502,065  | 5.17E-06 | 0.450 | 0.463 |  |  |  | <i>MIR184</i>       | TSS200  |
| cg08879559 | 5  | 151,066,486 | 2.09E-15 | 0.450 | 0.404 |  |  |  | <i>SPARC</i>        | 1stExon |
| cg10940462 | 11 | 64,479,015  | 1.95E-06 | 0.450 | 0.430 |  |  |  | <i>NRXN2</i>        | Body    |
| cg17278864 | 17 | 12,877,321  | 1.98E-05 | 0.450 | 0.261 |  |  |  | <i>RICH2</i>        | Body    |
| cg07139301 | 3  | 170,746,207 | 2.22E-08 | 0.450 | 0.410 |  |  |  | <i>SLC2A2</i>       | TSS1500 |
| cg09490603 | 15 | 74,658,166  | 1.46E-52 | 0.450 | 0.449 |  |  |  | <i>CYP11A1</i>      | 1stExon |
| cg06654691 | 17 | 40,825,980  | 2.5E-109 | 0.450 | 0.435 |  |  |  | <i>PLEKHH3</i>      | Body    |
| cg21799346 | 11 | 2,905,372   | 2.52E-06 | 0.450 | 0.370 |  |  |  | <i>CDKN1C</i>       | Body    |
| cg16725050 | 2  | 220,117,771 | 4.63E-25 | 0.450 | 0.470 |  |  |  | <i>TUBA4B</i>       | TSS200  |
| cg11566244 | 11 | 67,351,786  | 4.39E-28 | 0.450 | 0.445 |  |  |  | <i>GSTP1</i>        | Body    |
| cg07795766 | 22 | 45,608,516  | 2.85E-08 | 0.450 | 0.413 |  |  |  | <i>C22orf9</i>      | Body    |
| cg22829182 | X  | 56,258,808  | 7.28E-08 | 0.450 | 0.392 |  |  |  | <i>KLF8</i>         | TSS200  |
| cg08163199 | 6  | 29,974,858  | 8.32E-11 | 0.449 | 0.455 |  |  |  | <i>HLA-J</i>        | Body    |
| cg14000361 | 6  | 10,882,336  | 4.36E-05 | 0.449 | 0.439 |  |  |  | <i>GCM2</i>         | TSS1500 |
| cg02053896 | X  | 70,151,117  | 6.65E-21 | 0.449 | 0.429 |  |  |  | <i>SLC7A3</i>       | TSS200  |
| cg26751972 | 6  | 29,692,000  | 7.01E-10 | 0.449 | 0.395 |  |  |  | <i>HLA-F</i>        | Body    |
| cg06540859 | X  | 46,434,696  | 1.92E-13 | 0.449 | 0.322 |  |  |  | <i>CHST7</i>        | 1stExon |
| cg14832998 | 7  | 157,530,956 | 2.09E-18 | 0.449 | 0.452 |  |  |  | <i>PTPRN2</i>       | Body    |
| cg13717446 | 17 | 62,777,761  | 6.4E-05  | 0.449 | 0.353 |  |  |  | <i>LOC146880</i>    | Body    |
| cg16107322 | 7  | 141,211,627 | 8.77E-77 | 0.449 | 0.430 |  |  |  |                     |         |
| cg17861863 | 10 | 1,454,387   | 0.000807 | 0.448 | 0.210 |  |  |  | <i>ADARB2</i>       | Body    |
| cg22399133 | 2  | 208,989,248 | 1.17E-05 | 0.448 | 0.427 |  |  |  | <i>CRYGD</i>        | 1stExon |
| cg18878992 | 17 | 43,974,344  | 6.91E-06 | 0.448 | 0.397 |  |  |  | <i>MAPT</i>         | 5'UTR   |
| cg00601450 | 5  | 74,908,170  | 5.03E-15 | 0.447 | 0.377 |  |  |  |                     |         |
| cg27209395 | 6  | 26,172,397  | 2.38E-07 | 0.447 | 0.488 |  |  |  |                     |         |
| cg04285033 | 21 | 46,143,498  | 6.6E-06  | 0.447 | 0.545 |  |  |  |                     |         |
| cg18698788 | 15 | 89,952,499  | 6.57E-08 | 0.447 | 0.395 |  |  |  |                     |         |
| cg09659004 | 6  | 29,975,078  | 7.08E-08 | 0.447 | 0.435 |  |  |  | <i>HLA-J</i>        | Body    |
| cg15707833 | 8  | 131,455,276 | 1.86E-06 | 0.447 | 0.289 |  |  |  |                     |         |

|            |    |             |          |       |       |  |  |     |                 |         |
|------------|----|-------------|----------|-------|-------|--|--|-----|-----------------|---------|
| cg03892356 | 12 | 54,420,837  | 4.15E-10 | 0.447 | 0.341 |  |  |     | <i>HOXC4</i>    | 5'UTR   |
| cg10592478 | 12 | 53,612,641  | 2.55E-24 | 0.447 | 0.461 |  |  |     | <i>RARG</i>     | Body    |
| cg10168635 | 2  | 191,044,980 | 1.65E-29 | 0.447 | 0.427 |  |  |     | <i>C2orf88</i>  | TSS1500 |
| cg24816460 | 6  | 4,775,203   | 0.000183 | 0.447 | 0.351 |  |  |     | <i>CDYL</i>     | TSS1500 |
| cg27280004 | 19 | 2,489,065   | 2.68E-24 | 0.447 | 0.447 |  |  |     |                 |         |
| cg20893717 | 7  | 100,318,190 | 0.005109 | 0.446 | 0.277 |  |  |     | <i>EPO</i>      | TSS1500 |
| cg18563413 | 19 | 51,843,854  | 5.87E-79 | 0.446 | 0.425 |  |  |     | <i>VSIG10L</i>  | Body    |
| cg03276785 | 7  | 54,956,202  | 6.14E-17 | 0.446 | 0.449 |  |  |     |                 |         |
| cg02090762 | 17 | 79,503,859  | 1.71E-05 | 0.446 | 0.418 |  |  |     | <i>FSCN2</i>    | Body    |
| cg00227578 | 5  | 34,657,676  | 1.01E-18 | 0.446 | 0.380 |  |  |     | <i>RAI14</i>    | 5'UTR   |
| cg09064304 | 4  | 141,419,169 | 1.4E-05  | 0.446 | 0.433 |  |  |     |                 |         |
| cg12451631 | 10 | 43,698,141  | 1.61E-18 | 0.446 | 0.448 |  |  |     | <i>RASGEF1A</i> | Body    |
| cg16998150 | 1  | 169,396,834 | 9.84E-33 | 0.446 | 0.431 |  |  |     | <i>C1orf114</i> | TSS200  |
| cg19439123 | 17 | 17,687,621  | 4.46E-09 | 0.446 | 0.402 |  |  |     | <i>RAI1</i>     | 5'UTR   |
| cg09920557 | 17 | 61,553,938  | 2.35E-15 | 0.445 | 0.400 |  |  |     | <i>ACE</i>      | TSS1500 |
| cg18108818 | 7  | 102,574,475 | 6.41E-27 | 0.445 | 0.445 |  |  |     | <i>FBXL13</i>   | Body    |
| cg20676696 | 1  | 110,210,444 | 9E-24    | 0.445 | 0.385 |  |  |     | <i>GSTM2</i>    | TSS200  |
| cg03628719 | 15 | 89,438,964  | 9.8E-31  | 0.445 | 0.423 |  |  |     | <i>HAPLN3</i>   | TSS200  |
| cg02532096 | 11 | 111,411,289 | 6.33E-14 | 0.444 | 0.453 |  |  |     | <i>LAYN</i>     | 5'UTR   |
| cg13975336 | 16 | 67,204,216  | 3.07E-06 | 0.444 | 0.488 |  |  |     |                 |         |
| cg11859529 | X  | 70,150,922  | 6.82E-06 | 0.444 | 0.417 |  |  |     | <i>SLC7A3</i>   | 1stExon |
| cg20842253 | 2  | 27,529,788  | 1.56E-30 | 0.444 | 0.396 |  |  |     | <i>TRIM54</i>   | 3'UTR   |
| cg02586610 | 3  | 122,745,092 | 2.61E-12 | 0.443 | 0.416 |  |  |     | <i>SEMA5B</i>   | 5'UTR   |
| cg13531315 | 19 | 41,354,553  | 2.04E-20 | 0.443 | 0.411 |  |  | Yes | <i>CYP2A6</i>   | Body    |
| cg02636041 | 10 | 43,698,008  | 1.52E-10 | 0.443 | 0.452 |  |  |     | <i>RASGEF1A</i> | Body    |
| cg06632027 | 4  | 90,757,378  | 4.97E-13 | 0.443 | 0.368 |  |  |     | <i>SNCA</i>     | 5'UTR   |
| cg16437908 | 2  | 85,640,810  | 2.69E-16 | 0.443 | 0.421 |  |  |     |                 |         |
| cg03936721 | 17 | 42,386,419  | 1.46E-21 | 0.443 | 0.424 |  |  |     | <i>RUNDC3A</i>  | Body    |
| cg08161922 | 12 | 2,163,608   | 0.008228 | 0.443 | 0.333 |  |  |     | <i>CACNA1C</i>  | Body    |
| cg14433074 | 6  | 30,711,090  | 1.42E-20 | 0.443 | 0.408 |  |  |     | <i>IER3</i>     | 3'UTR   |
| cg12513880 | 12 | 115,136,298 | 4.79E-32 | 0.443 | 0.433 |  |  |     |                 |         |
| cg12763668 | 1  | 19,687,257  | 3.62E-22 | 0.443 | 0.445 |  |  |     | <i>CAPZB</i>    | Body    |
| cg21026830 | 14 | 60,973,517  | 5.79E-05 | 0.443 | 0.472 |  |  |     |                 |         |
| cg21868134 | 1  | 45,792,660  | 0.000172 | 0.443 | 0.452 |  |  |     | <i>HPDL</i>     | 1stExon |



|            |    |             |          |       |       |          |       |  |          |         |
|------------|----|-------------|----------|-------|-------|----------|-------|--|----------|---------|
| cg26792821 | 5  | 113,390,882 | 1.04E-33 | 0.443 | 0.433 |          |       |  |          |         |
| cg16318112 | 1  | 969,254     | 1.15E-07 | 0.442 | 0.475 |          |       |  | AGRN     | Body    |
| cg23356769 | X  | 129,245,245 | 2.17E-14 | 0.442 | 0.384 |          |       |  | ELF4     | TSS1500 |
| cg05309989 | 14 | 50,527,872  | 1.28E-29 | 0.442 | 0.431 |          |       |  |          |         |
| cg13885357 | 12 | 53,184,041  | 0.000146 | 0.442 | 0.543 |          |       |  | KRT3     | Body    |
| cg07249274 | 5  | 112,629,565 | 5.67E-05 | 0.442 | 0.352 |          |       |  | MCC      | Body    |
| cg10575376 | 12 | 124,246,446 | 0.000648 | 0.442 | 0.201 |          |       |  | DNAH10   | TSS1500 |
| cg15140902 | 6  | 21,667,815  | 1.91E-25 | 0.442 | 0.413 |          |       |  | FLJ22536 | Body    |
| cg22097768 | 17 | 61,615,913  | 1.43E-54 | 0.442 | 0.428 |          |       |  | KCNH6    | Body    |
| cg14709691 | 1  | 46,632,871  | 2.12E-23 | 0.442 | 0.452 |          |       |  |          |         |
| cg16482474 | 7  | 151,107,637 | 2.13E-07 | 0.442 | 0.433 |          |       |  | WDR86    | TSS1500 |
| cg14862207 | 17 | 36,715,798  | 0.000317 | 0.442 | 0.411 |          |       |  | SRCIN1   | Body    |
| cg09337254 | 2  | 85,640,762  | 2.71E-14 | 0.442 | 0.384 |          |       |  |          |         |
| cg05452524 | 17 | 53,343,029  | 0.001418 | 0.441 | 0.430 |          |       |  | HLF      | Body    |
| cg09300114 | 17 | 73,084,329  | 2.9E-36  | 0.441 | 0.430 | 7.38E-37 | 0.274 |  | SLC16A5  | 5'UTR   |
| cg10742957 | 19 | 39,466,716  | 8.86E-17 | 0.441 | 0.458 |          |       |  | FBXO17   | TSS1500 |
| cg06805513 | X  | 73,641,955  | 0.001516 | 0.441 | 0.188 |          |       |  | SLC16A2  | Body    |
| cg00742920 | 13 | 27,050,512  | 9.98E-18 | 0.441 | 0.452 |          |       |  |          |         |
| cg07016276 | 6  | 29,692,009  | 6.81E-09 | 0.441 | 0.420 |          |       |  | HLA-F    | Body    |
| cg08022244 | 7  | 157,361,759 | 4.32E-25 | 0.441 | 0.429 |          |       |  | PTPRN2   | Body    |
| cg14371731 | 10 | 81,003,175  | 7.88E-05 | 0.441 | 0.408 |          |       |  | ZMIZ1    | Body    |
| cg09556515 | 16 | 85,470,485  | 3.47E-39 | 0.441 | 0.418 |          |       |  |          |         |
| cg03995122 | 6  | 29,894,642  | 7.71E-08 | 0.441 | 0.426 |          |       |  | HCG4P6   | TSS1500 |
| cg01037637 | 18 | 59,560,289  | 9.15E-13 | 0.441 | 0.357 |          |       |  | RNF152   | 1stExon |
| cg13605398 | 17 | 7,826,366   | 0.006105 | 0.441 | 0.415 |          |       |  | KCNAB3   | 3'UTR   |
| cg26937868 | 1  | 26,202,601  | 1.93E-32 | 0.441 | 0.393 |          |       |  |          |         |
| cg13208318 | 7  | 54,956,274  | 6.25E-17 | 0.441 | 0.401 |          |       |  |          |         |
| cg24974704 | 8  | 144,577,238 | 4.59E-22 | 0.441 | 0.417 |          |       |  | ZC3H3    | Body    |
| cg16100120 | 2  | 56,150,475  | 1.25E-10 | 0.440 | 0.401 |          |       |  | EFEMP1   | TSS200  |
| cg13516209 | 6  | 29,855,302  | 1.64E-30 | 0.440 | 0.432 |          |       |  | HLA-H    | TSS200  |
| cg07147449 | 12 | 115,136,072 | 1.61E-15 | 0.440 | 0.429 |          |       |  |          |         |
| cg15613420 | 5  | 134,735,637 | 1.08E-09 | 0.440 | 0.432 |          |       |  | H2AFY    | TSS1500 |
| cg15627710 | 1  | 154,972,140 | 1.2E-07  | 0.440 | 0.434 |          |       |  |          |         |
| cg02467990 | 7  | 49,813,102  | 0.001571 | 0.440 | 0.533 |          |       |  | VWC2     | TSS200  |

|            |    |             |          |       |       |          |       |     |                 |         |
|------------|----|-------------|----------|-------|-------|----------|-------|-----|-----------------|---------|
| cg08879910 | 6  | 29,974,319  | 2.3E-09  | 0.440 | 0.435 |          |       |     | <i>HLA-J</i>    | Body    |
| cg13261825 | 10 | 98,939,742  | 4.45E-23 | 0.440 | 0.413 |          |       |     | <i>SLIT1</i>    | Body    |
| cg06947913 | 12 | 50,297,793  | 0.000508 | 0.440 | 0.260 |          |       |     | <i>FAIM2</i>    | TSS200  |
| cg20098471 | 11 | 13,032,613  | 2.25E-06 | 0.440 | 0.366 |          |       |     | <i>RASSF10</i>  | Body    |
| cg15407528 | 6  | 30,418,985  | 1.7E-07  | 0.439 | 0.509 |          |       |     |                 |         |
| cg01552275 | 7  | 2,654,530   | 3.99E-09 | 0.439 | 0.365 |          |       | Yes |                 |         |
| cg11930554 | 4  | 74,809,912  | 0.000186 | 0.439 | 0.392 |          |       |     |                 |         |
| cg23235241 | 16 | 25,704,505  | 1.83E-11 | 0.439 | 0.452 |          |       |     | <i>HS3ST4</i>   | Body    |
| cg10594090 | 19 | 46,800,198  | 1.41E-07 | 0.439 | 0.397 |          |       |     | <i>HIF3A</i>    | TSS200  |
| cg16585972 | 14 | 23,835,212  | 4.06E-41 | 0.439 | 0.403 |          |       |     | <i>EFS</i>      | TSS1500 |
| cg26704078 | 18 | 24,131,115  | 2.25E-25 | 0.439 | 0.412 |          |       |     | <i>KCTD1</i>    | 5'UTR   |
| cg02072495 | 15 | 60,689,285  | 4.01E-15 | 0.439 | 0.334 |          |       |     | <i>ANXA2</i>    | 5'UTR   |
| cg04170192 | 6  | 30,418,941  | 3.43E-11 | 0.439 | 0.464 |          |       |     |                 |         |
| cg16260298 | 7  | 116,140,342 | 2.27E-20 | 0.439 | 0.422 |          |       |     | <i>CAV2</i>     | Body    |
| cg16232979 | 19 | 16,187,631  | 0.009162 | 0.438 | 0.415 | 2.61E-25 | 0.287 |     | <i>TPM4</i>     | Body    |
| cg23511432 | 5  | 137,610,255 | 0.002463 | 0.438 | 0.393 |          |       |     | <i>GFRA3</i>    | TSS200  |
| cg20003494 | 4  | 90,757,398  | 3.11E-06 | 0.438 | 0.362 |          |       |     | <i>SNCA</i>     | 5'UTR   |
| cg21098557 | 5  | 43,191,993  | 3.99E-14 | 0.438 | 0.340 |          |       |     | <i>MGC42105</i> | TSS1500 |
| cg14134732 | 16 | 3,079,894   | 2.73E-25 | 0.438 | 0.431 |          |       |     | <i>CCDC64B</i>  | Body    |
| cg02879662 | 19 | 46,800,467  | 1.05E-08 | 0.438 | 0.422 | 4.52E-31 | 0.315 |     | <i>HIF3A</i>    | Body    |
| cg11871960 | 14 | 97,058,777  | 5E-05    | 0.438 | 0.404 |          |       |     |                 |         |
| cg11246563 | 6  | 29,855,406  | 4.56E-29 | 0.438 | 0.389 |          |       |     | <i>HLA-H</i>    | Body    |
| cg18652900 | 19 | 15,580,445  | 1.46E-22 | 0.438 | 0.433 |          |       |     | <i>PGLYRP2</i>  | Body    |
| cg06363129 | 7  | 16,505,602  | 3.88E-22 | 0.438 | 0.447 | 2.99E-10 | 0.173 |     | <i>SOSTDC1</i>  | TSS200  |
| cg14482902 | 17 | 36,714,803  | 8.1E-07  | 0.437 | 0.280 |          |       |     | <i>SRCIN1</i>   | Body    |
| cg24779587 | 11 | 47,209,163  | 3.67E-29 | 0.437 | 0.424 |          |       |     | <i>PACSIN3</i>  | TSS1500 |
| cg26870192 | 6  | 137,242,062 | 7.85E-07 | 0.437 | 0.514 |          |       |     | <i>SLC35D3</i>  | TSS1500 |
| cg04791822 | X  | 47,441,573  | 6.1E-08  | 0.437 | 0.423 |          |       |     | <i>SYN1</i>     | Body    |
| cg06655100 | X  | 56,259,373  | 1.04E-16 | 0.437 | 0.437 | 5.47E-21 | 0.212 |     | <i>KLF8</i>     | 5'UTR   |
| cg17329164 | 6  | 32,121,259  | 4.15E-22 | 0.437 | 0.447 | 1.15E-28 | 0.300 |     | <i>PPT2</i>     | TSS200  |
| cg04505435 | 11 | 70,672,511  | 4.95E-27 | 0.437 | 0.418 |          |       |     | <i>SHANK2</i>   | Body    |
| cg09910635 | 7  | 97,361,026  | 8.04E-19 | 0.437 | 0.406 |          |       |     | <i>TAC1</i>     | TSS1500 |
| cg19537719 | 8  | 41,583,498  | 2.11E-12 | 0.437 | 0.412 |          |       |     | <i>ANK1</i>     | Body    |
| cg27084746 | 6  | 31,831,532  | 4.07E-35 | 0.437 | 0.408 |          |       |     | <i>NEU1</i>     | TSS1500 |

|            |    |             |          |       |       |  |  |  |                |         |
|------------|----|-------------|----------|-------|-------|--|--|--|----------------|---------|
| cg15621260 | 11 | 27,015,813  | 1.56E-10 | 0.437 | 0.432 |  |  |  | <i>FIBIN</i>   | 5'UTR   |
| cg13940444 | 12 | 53,617,382  | 1.8E-22  | 0.436 | 0.428 |  |  |  | <i>RARG</i>    | Body    |
| cg14594187 | 9  | 124,498,961 | 4.32E-35 | 0.436 | 0.436 |  |  |  | <i>DAB2IP</i>  | Body    |
| cg06969287 | 22 | 28,838,631  | 7.73E-22 | 0.436 | 0.418 |  |  |  | <i>TTC28</i>   | Body    |
| cg26591930 | 11 | 70,672,986  | 2.74E-11 | 0.436 | 0.389 |  |  |  | <i>SHANK2</i>  | Body    |
| cg19254906 | 1  | 43,251,253  | 3.09E-06 | 0.436 | 0.435 |  |  |  |                |         |
| cg14928057 | 17 | 4,891,542   | 7.45E-06 | 0.436 | 0.340 |  |  |  | <i>INCA1</i>   | 3'UTR   |
| cg07347092 | 12 | 124,246,927 | 0.000672 | 0.436 | 0.189 |  |  |  | <i>DNAH10</i>  | TSS200  |
| cg07116010 | 9  | 35,646,325  | 1.27E-06 | 0.436 | 0.342 |  |  |  |                |         |
| cg19003815 | 3  | 25,469,914  | 4.1E-32  | 0.435 | 0.423 |  |  |  | <i>RARB</i>    | 5'UTR   |
| cg24725574 | 6  | 29,974,717  | 8.06E-08 | 0.435 | 0.431 |  |  |  | <i>HLA-J</i>   | Body    |
| cg07326438 | 11 | 57,194,562  | 0.000979 | 0.435 | 0.371 |  |  |  | <i>SLC43A3</i> | 5'UTR   |
| cg06928838 | 11 | 67,351,490  | 2.31E-43 | 0.435 | 0.421 |  |  |  | <i>GSTP1</i>   | Body    |
| cg14283569 | 19 | 51,416,213  | 7.59E-37 | 0.435 | 0.418 |  |  |  |                |         |
| cg21601837 | 3  | 125,900,065 | 4.92E-36 | 0.435 | 0.404 |  |  |  | <i>ALDH1L1</i> | TSS1500 |
| cg24716879 | 1  | 235,105,872 | 1.27E-19 | 0.435 | 0.369 |  |  |  |                |         |
| cg08244085 | 12 | 63,025,730  | 1.22E-08 | 0.435 | 0.351 |  |  |  |                |         |
| cg26625629 | 2  | 21,022,877  | 0.000752 | 0.435 | 0.395 |  |  |  | <i>C2orf43</i> | TSS200  |
| cg07484673 | 7  | 99,155,878  | 7.8E-05  | 0.435 | 0.302 |  |  |  | <i>ZNF655</i>  | TSS200  |
| cg08042316 | 7  | 139,930,256 | 0.004902 | 0.435 | 0.319 |  |  |  |                |         |
| cg08101303 | 7  | 96,652,222  | 2.62E-08 | 0.435 | 0.439 |  |  |  | <i>DLX5</i>    | Body    |
| cg09065876 | 17 | 45,949,756  | 1.28E-09 | 0.435 | 0.358 |  |  |  |                |         |
| cg25480336 | 20 | 50,720,908  | 4.89E-08 | 0.435 | 0.449 |  |  |  | <i>ZFP64</i>   | Body    |
| cg01146875 | 3  | 170,746,172 | 2.9E-21  | 0.434 | 0.411 |  |  |  | <i>SLC2A2</i>  | TSS1500 |
| cg11560280 | 12 | 54,089,497  | 3.32E-06 | 0.434 | 0.420 |  |  |  |                |         |
| cg07724670 | 20 | 45,440,228  | 3.82E-24 | 0.434 | 0.405 |  |  |  |                |         |
| cg21908235 | 1  | 146,551,744 | 7.39E-46 | 0.434 | 0.435 |  |  |  |                |         |
| cg14130039 | 6  | 32,121,225  | 2.49E-13 | 0.434 | 0.457 |  |  |  | <i>PPT2</i>    | TSS200  |
| cg05467676 | 3  | 72,226,965  | 9.59E-19 | 0.434 | 0.433 |  |  |  |                |         |
| cg06102403 | 20 | 30,458,708  | 7.38E-06 | 0.434 | 0.332 |  |  |  | <i>TTLL9</i>   | 5'UTR   |
| cg08862890 | 5  | 169,064,451 | 3.18E-06 | 0.434 | 0.396 |  |  |  | <i>DOCK2</i>   | Body    |
| cg18726691 | 15 | 90,039,613  | 2.32E-08 | 0.434 | 0.449 |  |  |  | <i>RHCG</i>    | 1stExon |
| cg01897797 | 14 | 22,005,140  | 1.37E-14 | 0.434 | 0.417 |  |  |  | <i>SALL2</i>   | 5'UTR   |
| cg22235821 | 3  | 140,796,104 | 9.03E-07 | 0.434 | 0.436 |  |  |  | <i>SPSB4</i>   | Body    |

|            |    |             |          |       |       |          |       |     |                  |         |
|------------|----|-------------|----------|-------|-------|----------|-------|-----|------------------|---------|
| cg02460251 | 5  | 176,107,427 | 7.91E-05 | 0.433 | 0.399 |          |       |     |                  |         |
| cg09856068 | 5  | 170,878,246 | 0.007331 | 0.433 | 0.545 |          |       |     | <i>FGF18</i>     | Body    |
| cg18077971 | 2  | 223,164,867 | 3.7E-08  | 0.433 | 0.465 |          |       |     | <i>PAX3</i>      | TSS1500 |
| cg20104456 | 19 | 51,568,523  | 5.61E-18 | 0.433 | 0.432 |          |       |     | <i>KLK13</i>     | TSS200  |
| cg20424164 | 12 | 65,220,294  | 1.63E-23 | 0.433 | 0.384 |          |       | Yes |                  |         |
| cg05196026 | X  | 137,793,096 | 7.93E-07 | 0.433 | 0.372 |          |       |     | <i>FGF13</i>     | Body    |
| cg18437209 | 11 | 35,105,199  | 1.61E-27 | 0.433 | 0.417 |          |       |     |                  |         |
| cg08476890 | X  | 138,774,601 | 2.46E-15 | 0.433 | 0.390 |          |       |     | <i>MCF2</i>      | 5'UTR   |
| cg18347010 | 17 | 55,888,532  | 3.93E-35 | 0.433 | 0.428 |          |       |     |                  |         |
| cg04765848 | 1  | 53,527,576  | 1.14E-24 | 0.433 | 0.385 |          |       |     | <i>PODN</i>      | TSS1500 |
| cg06359703 | 1  | 41,847,297  | 0.000275 | 0.432 | 0.233 |          |       |     |                  |         |
| cg00174573 | 12 | 125,172,635 | 6.26E-30 | 0.432 | 0.408 |          |       |     |                  |         |
| cg14991984 | 1  | 99,470,129  | 1.2E-05  | 0.432 | 0.500 |          |       |     | <i>LPPR5</i>     | 1stExon |
| cg17588266 | 15 | 74,658,330  | 6.02E-27 | 0.432 | 0.421 |          |       |     | <i>CYP11A1</i>   | 1stExon |
| cg17511968 | 2  | 219,721,165 | 1.07E-22 | 0.432 | 0.400 |          |       |     |                  |         |
| cg24027937 | 19 | 709,809     | 9.38E-39 | 0.432 | 0.394 |          |       |     | <i>PALM</i>      | Body    |
| cg00815013 | X  | 107,681,737 | 2.84E-22 | 0.432 | 0.447 |          |       |     | <i>COL4A5</i>    | TSS1500 |
| cg13958426 | 1  | 169,396,637 | 2.13E-05 | 0.432 | 0.419 | 1.22E-15 | 0.201 |     | <i>C1orf114</i>  | 1stExon |
| cg26029345 | 8  | 22,960,820  | 0.009442 | 0.432 | 0.308 |          |       |     | <i>TNFRSF10C</i> | Body    |
| cg00279790 | 1  | 46,914,033  | 5.01E-20 | 0.431 | 0.393 |          |       |     |                  |         |
| cg11988831 | 20 | 4,803,490   | 9.71E-12 | 0.431 | 0.365 |          |       |     | <i>RASSF2</i>    | 5'UTR   |
| cg23008871 | 17 | 45,949,743  | 1.38E-08 | 0.431 | 0.364 |          |       |     |                  |         |
| cg27507687 | 3  | 48,632,484  | 0.02201  | 0.431 | 0.442 |          |       |     | <i>COL7A1</i>    | Body    |
| cg08377924 | 17 | 41,363,628  | 7.43E-13 | 0.431 | 0.390 |          |       |     | <i>NBR1</i>      | 3'UTR   |
| cg20818417 | 1  | 76,082,690  | 2.21E-06 | 0.431 | 0.379 |          |       |     |                  |         |
| cg10959711 | 1  | 153,509,096 | 4.7E-28  | 0.431 | 0.399 |          |       |     | <i>S100A6</i>    | TSS1500 |
| cg19320816 | 6  | 26,087,776  | 0.002615 | 0.431 | 0.402 |          |       |     | <i>HFE</i>       | Body    |
| cg22125968 | 13 | 43,566,472  | 0.000129 | 0.431 | 0.426 |          |       |     | <i>EPSTI1</i>    | TSS200  |
| cg10024583 | 17 | 45,772,800  | 5.67E-30 | 0.431 | 0.418 |          |       |     | <i>TBKBP1</i>    | 1stExon |
| cg15579650 | X  | 101,906,119 | 0.022849 | 0.431 | 0.471 |          |       |     | <i>GPRASP1</i>   | TSS200  |
| cg09907758 | 11 | 63,537,459  | 5.51E-32 | 0.430 | 0.423 |          |       |     | <i>C11orf95</i>  | TSS1500 |
| cg15323528 | 10 | 73,156,427  | 6.71E-17 | 0.430 | 0.405 |          |       |     | <i>CDH23</i>     | TSS1500 |
| cg00987031 | 5  | 140,893,101 | 7.5E-20  | 0.430 | 0.350 |          |       |     |                  |         |
| cg10840277 | 8  | 124,829,410 | 1.03E-23 | 0.430 | 0.453 |          |       |     |                  |         |

|            |    |             |          |       |       |          |       |  |                |         |
|------------|----|-------------|----------|-------|-------|----------|-------|--|----------------|---------|
| cg23208176 | 5  | 1,876,168   | 3.5E-11  | 0.430 | 0.397 |          |       |  |                |         |
| cg18242030 | 5  | 58,335,271  | 5.16E-12 | 0.430 | 0.375 |          |       |  | <i>PDE4D</i>   | Body    |
| cg03679305 | 1  | 9,129,487   | 8.29E-15 | 0.430 | 0.406 | 2.51E-23 | 0.175 |  | <i>SLC2A5</i>  | Body    |
| cg01579535 | 12 | 54,447,292  | 1.76E-14 | 0.430 | 0.392 |          |       |  | <i>HOXC4</i>   | 5'UTR   |
| cg16371082 | 3  | 134,083,158 | 1.9E-32  | 0.430 | 0.460 |          |       |  | <i>AMOTL2</i>  | Body    |
| cg00930615 | 15 | 60,690,667  | 8.68E-17 | 0.430 | 0.374 |          |       |  | <i>ANXA2</i>   | TSS1500 |
| cg01663018 | 15 | 53,097,777  | 0.003508 | 0.429 | 0.357 |          |       |  |                |         |
| cg09287459 | X  | 39,548,787  | 7.78E-06 | 0.429 | 0.345 |          |       |  |                |         |
| cg24818939 | X  | 101,906,109 | 0.022063 | 0.429 | 0.481 |          |       |  | <i>GPRASP1</i> | TSS200  |
| cg04880618 | 17 | 74,706,567  | 0.001609 | 0.429 | 0.324 |          |       |  | <i>MXRA7</i>   | Body    |
| cg03949008 | X  | 2,846,196   | 1.49E-35 | 0.429 | 0.399 |          |       |  | <i>ARSD</i>    | Body    |
| cg14206172 | 19 | 39,466,757  | 4.16E-29 | 0.429 | 0.431 |          |       |  | <i>FBXO17</i>  | TSS1500 |
| cg01738650 | 6  | 32,223,076  | 1.35E-08 | 0.429 | 0.395 |          |       |  |                |         |
| cg18337963 | 11 | 46,383,209  | 2.25E-30 | 0.429 | 0.422 |          |       |  | <i>DGKZ</i>    | 1stExon |
| cg00224083 | 4  | 139,773,135 | 5.17E-19 | 0.429 | 0.402 |          |       |  |                |         |
| cg10147666 | 2  | 219,646,481 | 0.000841 | 0.429 | 0.293 |          |       |  | <i>CYP27A1</i> | 5'UTR   |
| cg06525551 | X  | 137,792,939 | 6.31E-09 | 0.429 | 0.324 |          |       |  | <i>FGF13</i>   | Body    |
| cg06968912 | 17 | 40,573,643  | 7.81E-23 | 0.429 | 0.420 |          |       |  | <i>PTRF</i>    | Body    |
| cg10692693 | 7  | 101,688,648 | 1.5E-36  | 0.429 | 0.417 |          |       |  | <i>CUX1</i>    | Body    |
| cg11267955 | 5  | 101,632,327 | 2.72E-06 | 0.429 | 0.444 |          |       |  | <i>SLCO4C1</i> | TSS200  |
| cg26360792 | 2  | 43,019,997  | 1.67E-07 | 0.429 | 0.263 |          |       |  | <i>HAAO</i>    | TSS1500 |
| cg18856652 | 2  | 43,864,913  | 3.41E-13 | 0.429 | 0.381 |          |       |  | <i>PLEKHH2</i> | 5'UTR   |
| cg07219542 | 1  | 110,210,770 | 4.4E-12  | 0.429 | 0.368 |          |       |  | <i>GSTM2</i>   | 1stExon |
| cg21041775 | 12 | 54,425,418  | 3.63E-20 | 0.429 | 0.383 |          |       |  | <i>HOXC4</i>   | 5'UTR   |
| cg25181710 | 2  | 26,045,287  | 6.47E-32 | 0.429 | 0.417 |          |       |  | <i>ASXL2</i>   | Body    |
| cg18709349 | 19 | 46,999,274  | 9.31E-06 | 0.429 | 0.442 |          |       |  | <i>PNMAL2</i>  | TSS200  |
| cg03126946 | 12 | 2,944,310   | 0.002066 | 0.428 | 0.233 |          |       |  | <i>NRIP2</i>   | TSS200  |
| cg19852958 | 4  | 13,545,760  | 3.54E-05 | 0.428 | 0.491 |          |       |  | <i>NKX3-2</i>  | 1stExon |
| cg02711647 | 2  | 45,237,689  | 0.000205 | 0.428 | 0.301 |          |       |  | <i>SIX2</i>    | TSS1500 |
| cg02156680 | 8  | 120,651,317 | 3.57E-12 | 0.428 | 0.431 |          |       |  | <i>ENPP2</i>   | TSS1500 |
| cg14792081 | 1  | 65,468,460  | 0.000622 | 0.428 | 0.319 |          |       |  |                |         |
| cg18486102 | 12 | 50,297,777  | 0.003652 | 0.428 | 0.244 |          |       |  | <i>FAIM2</i>   | TSS200  |
| cg15267232 | 10 | 8,097,689   | 4.65E-40 | 0.428 | 0.396 |          |       |  | <i>GATA3</i>   | Body    |
| cg16927871 | 3  | 25,469,991  | 2.81E-32 | 0.428 | 0.410 |          |       |  | <i>RARB</i>    | 5'UTR   |

|            |    |             |          |       |       |          |       |  |                  |         |
|------------|----|-------------|----------|-------|-------|----------|-------|--|------------------|---------|
| cg09350274 | 5  | 137,610,396 | 0.001948 | 0.428 | 0.358 | 7.02E-12 | 0.184 |  | <i>GFRA3</i>     | TSS200  |
| cg17393917 | 12 | 106,533,840 | 5.75E-25 | 0.428 | 0.412 |          |       |  | <i>NUAK1</i>     | TSS200  |
| cg11664500 | 6  | 133,562,479 | 1.88E-06 | 0.427 | 0.516 |          |       |  | <i>EYA4</i>      | TSS200  |
| cg09780231 | 17 | 873,452     | 7.64E-24 | 0.427 | 0.398 |          |       |  | <i>NXN</i>       | Body    |
| cg09695033 | 2  | 29,337,988  | 5.62E-08 | 0.427 | 0.310 |          |       |  | <i>CLIP4</i>     | TSS1500 |
| cg22187722 | 7  | 29,185,965  | 1.78E-09 | 0.427 | 0.384 |          |       |  | <i>CPVL</i>      | 5'UTR   |
| cg18267506 | 1  | 48,937,445  | 4.88E-07 | 0.427 | 0.313 |          |       |  | <i>SPATA6</i>    | Body    |
| cg01893212 | 7  | 49,813,088  | 0.015338 | 0.427 | 0.505 |          |       |  | <i>VWC2</i>      | TSS200  |
| cg00236832 | 17 | 38,465,489  | 8.03E-11 | 0.427 | 0.440 | 9.78E-28 | 0.288 |  | <i>RARA</i>      | 5'UTR   |
| cg12708994 | 6  | 116,691,460 | 1.17E-32 | 0.427 | 0.387 |          |       |  | <i>DSE</i>       | TSS1500 |
| cg19561297 | 7  | 102,553,457 | 3.65E-44 | 0.427 | 0.404 |          |       |  | <i>LRRC17</i>    | 5'UTR   |
| cg06223162 | 1  | 101,003,688 | 1.54E-26 | 0.427 | 0.395 |          |       |  | <i>GPR88</i>     | TSS200  |
| cg01610165 | 5  | 124,071,029 | 8.91E-05 | 0.427 | 0.356 |          |       |  | <i>ZNF608</i>    | Body    |
| cg26477549 | 12 | 106,642,937 | 7.67E-12 | 0.427 | 0.414 |          |       |  | <i>CKAP4</i>     | TSS1500 |
| cg21634602 | 5  | 112,073,570 | 0.00055  | 0.427 | 0.242 | 1.89E-13 | 0.220 |  | <i>APC</i>       | 1stExon |
| cg13631572 | 14 | 24,803,903  | 0.00014  | 0.426 | 0.457 |          |       |  | <i>ADCY4</i>     | TSS200  |
| cg12814550 | X  | 119,134,684 | 2.99E-05 | 0.426 | 0.328 |          |       |  |                  |         |
| cg12026563 | 19 | 18,415,804  | 1.06E-18 | 0.426 | 0.421 |          |       |  |                  |         |
| cg23824801 | 12 | 54,653,403  | 5.73E-47 | 0.426 | 0.430 |          |       |  | <i>CBX5</i>      | TSS200  |
| cg04669574 | 12 | 50,297,945  | 0.000401 | 0.426 | 0.244 |          |       |  | <i>FAIM2</i>     | TSS1500 |
| cg08518631 | 10 | 102,905,681 | 4.61E-08 | 0.426 | 0.443 |          |       |  |                  |         |
| cg04945541 | 17 | 43,299,826  | 1.66E-24 | 0.426 | 0.388 | 1.2E-34  | 0.232 |  | <i>FMNL1</i>     | Body    |
| cg13000649 | 17 | 17,626,790  | 6.35E-27 | 0.426 | 0.410 |          |       |  | <i>RAI1</i>      | 5'UTR   |
| cg21347053 | 6  | 1,624,978   | 9.7E-19  | 0.426 | 0.405 |          |       |  | <i>GMDS</i>      | Body    |
| cg01536987 | 13 | 43,566,492  | 8.94E-05 | 0.426 | 0.406 |          |       |  | <i>EPSTI1</i>    | TSS200  |
| cg24852548 | 4  | 57,522,632  | 2.94E-10 | 0.426 | 0.439 |          |       |  | <i>HOPX</i>      | 1stExon |
| cg09235583 | 6  | 30,711,141  | 3.43E-20 | 0.426 | 0.401 |          |       |  | <i>IER3</i>      | 3'UTR   |
| cg24480859 | 1  | 9,129,791   | 8.91E-21 | 0.426 | 0.391 | 1.19E-25 | 0.242 |  | <i>SLC2A5</i>    | 5'UTR   |
| cg23200020 | 19 | 35,068,555  | 4.05E-17 | 0.426 | 0.394 |          |       |  | <i>LOC643719</i> | Body    |
| cg11417025 | 7  | 16,505,589  | 3.03E-21 | 0.426 | 0.399 |          |       |  | <i>SOSTDC1</i>   | TSS200  |
| cg25209842 | 10 | 103,536,342 | 2.19E-09 | 0.426 | 0.392 |          |       |  | <i>FGF8</i>      | TSS1500 |
| cg16794576 | 6  | 29,974,971  | 3.04E-11 | 0.426 | 0.421 |          |       |  | <i>HLA-J</i>     | Body    |
| cg13356133 | 17 | 12,877,772  | 4.3E-06  | 0.426 | 0.261 |          |       |  | <i>RICH2</i>     | Body    |
| cg02773050 | X  | 134,654,287 | 9.47E-09 | 0.425 | 0.335 |          |       |  | <i>DDX26B</i>    | TSS1500 |

|            |    |             |          |       |       |          |       |  |                 |         |
|------------|----|-------------|----------|-------|-------|----------|-------|--|-----------------|---------|
| cg25916282 | 2  | 177,023,760 | 0.001255 | 0.425 | 0.433 |          |       |  |                 |         |
| cg05497345 | 2  | 96,990,914  | 5.96E-08 | 0.425 | 0.453 |          |       |  | <i>ITPRIPL1</i> | TSS1500 |
| cg14861089 | 10 | 102,895,043 | 9.72E-07 | 0.425 | 0.399 |          |       |  | <i>TLX1</i>     | Body    |
| cg07186138 | 22 | 39,410,396  | 1.07E-15 | 0.425 | 0.391 | 7.7E-36  | 0.301 |  | <i>APOBEC3C</i> | Body    |
| cg07838272 | 7  | 116,164,670 | 1.02E-09 | 0.425 | 0.338 |          |       |  | <i>CAV1</i>     | TSS200  |
| cg17723653 | 10 | 75,407,823  | 1.13E-12 | 0.425 | 0.355 |          |       |  | <i>SYNPO2L</i>  | Body    |
| cg20569203 | 12 | 120,799,911 | 1.33E-18 | 0.425 | 0.419 |          |       |  | <i>MSI1</i>     | Body    |
| cg00590761 | 1  | 55,008,319  | 6.54E-16 | 0.425 | 0.378 |          |       |  |                 |         |
| cg14855334 | 15 | 74,658,553  | 1.53E-14 | 0.425 | 0.400 |          |       |  | <i>CYP11A1</i>  | Body    |
| cg12727795 | 5  | 149,535,695 | 4.58E-33 | 0.425 | 0.432 | 2.61E-24 | 0.323 |  | <i>PDGFRB</i>   | TSS1500 |
| cg12239742 | X  | 18,116,923  | 2.28E-14 | 0.425 | 0.381 |          |       |  |                 |         |
| cg06654549 | 5  | 1,875,058   | 1.51E-18 | 0.425 | 0.419 |          |       |  |                 |         |
| cg13857811 | X  | 70,151,209  | 2.52E-10 | 0.425 | 0.412 |          |       |  | <i>SLC7A3</i>   | TSS1500 |
| cg25813864 | 17 | 38,334,176  | 3.51E-05 | 0.425 | 0.346 |          |       |  | <i>RAPGEFL1</i> | TSS200  |
| cg05910443 | 7  | 101,688,675 | 2.22E-34 | 0.425 | 0.407 |          |       |  | <i>CUX1</i>     | Body    |
| cg11570367 | 13 | 114,896,683 | 0.000238 | 0.425 | 0.380 |          |       |  | <i>RASA3</i>    | Body    |
| cg25950739 | X  | 101,907,254 | 8.05E-09 | 0.425 | 0.440 |          |       |  | <i>GPRASP1</i>  | 5'UTR   |
| cg04931383 | 4  | 37,978,731  | 4.65E-47 | 0.425 | 0.405 |          |       |  | <i>TBC1D1</i>   | Body    |
| cg12436377 | 5  | 87,440,296  | 0.003198 | 0.424 | 0.535 |          |       |  |                 |         |
| cg03834574 | X  | 56,259,094  | 6.43E-10 | 0.424 | 0.412 |          |       |  | <i>KLF8</i>     | 5'UTR   |
| cg14449180 | 6  | 29,894,619  | 4.72E-08 | 0.424 | 0.420 |          |       |  | <i>HCG4P6</i>   | TSS1500 |
| cg00691999 | 4  | 55,094,011  | 0.001894 | 0.424 | 0.464 |          |       |  | <i>PDGFRA</i>   | TSS1500 |
| cg19068385 | X  | 47,483,024  | 0.010199 | 0.424 | 0.119 |          |       |  |                 |         |
| cg11751645 | 11 | 56,947,754  | 0.000104 | 0.424 | 0.369 |          |       |  | <i>LRR55</i>    | TSS1500 |
| cg06088324 | 16 | 19,895,321  | 1.81E-05 | 0.424 | 0.451 |          |       |  | <i>GPRC5B</i>   | 5'UTR   |
| cg19447962 | 17 | 17,628,656  | 1.74E-27 | 0.424 | 0.432 |          |       |  | <i>RAI1</i>     | 5'UTR   |
| cg02501155 | 16 | 79,263,473  | 4.97E-18 | 0.424 | 0.366 |          |       |  |                 |         |
| cg18260397 | 5  | 154,230,438 | 5.35E-31 | 0.424 | 0.422 |          |       |  | <i>C5orf4</i>   | TSS1500 |
| cg22753340 | 6  | 31,831,489  | 4.7E-16  | 0.424 | 0.416 |          |       |  | <i>NEU1</i>     | TSS1500 |
| cg20431135 | 17 | 19,290,762  | 1.49E-32 | 0.424 | 0.423 |          |       |  | <i>MFAP4</i>    | TSS1500 |
| cg01765758 | X  | 106,750,146 | 8.82E-12 | 0.424 | 0.427 |          |       |  |                 |         |
| cg16642281 | 4  | 109,034,555 | 3.72E-12 | 0.424 | 0.440 |          |       |  | <i>LEF1</i>     | Body    |
| cg02032778 | 7  | 29,186,228  | 1.29E-06 | 0.424 | 0.379 |          |       |  | <i>CPVL</i>     | TSS200  |
| cg01185682 | 17 | 53,343,553  | 6.99E-10 | 0.424 | 0.402 |          |       |  | <i>HLF</i>      | Body    |

|            |    |             |          |       |       |          |       |     |                  |         |
|------------|----|-------------|----------|-------|-------|----------|-------|-----|------------------|---------|
| cg19259179 | 7  | 54,956,252  | 5.54E-25 | 0.424 | 0.430 |          |       |     |                  |         |
| cg15176829 | 1  | 246,952,215 | 1.57E-31 | 0.424 | 0.371 |          |       |     | <i>LOC149134</i> | TSS1500 |
| cg25318809 | 6  | 29,974,863  | 1.02E-11 | 0.424 | 0.434 |          |       |     | <i>HLA-J</i>     | Body    |
| cg27397850 | 7  | 27,281,941  | 3.52E-12 | 0.424 | 0.339 |          |       |     | <i>EVX1</i>      | TSS1500 |
| cg07969619 | 12 | 115,136,279 | 1.15E-21 | 0.423 | 0.406 |          |       |     |                  |         |
| cg09193347 | 15 | 79,381,867  | 8.5E-15  | 0.423 | 0.414 |          |       |     | <i>RASGRF1</i>   | Body    |
| cg01698298 | 11 | 61,062,964  | 1.16E-12 | 0.423 | 0.345 |          |       |     | <i>VWCE</i>      | TSS200  |
| cg14544666 | 5  | 179,634,789 | 7.29E-09 | 0.423 | 0.464 |          |       |     | <i>RASGEF1C</i>  | 5'UTR   |
| cg13488570 | 1  | 2,222,253   | 5.37E-10 | 0.423 | 0.408 |          |       | Yes | <i>SKI</i>       | Body    |
| cg02823783 | 12 | 124,246,919 | 0.000834 | 0.423 | 0.188 |          |       |     | <i>DNAH10</i>    | TSS200  |
| cg04705659 | 1  | 204,329,107 | 6.63E-12 | 0.423 | 0.424 |          |       |     | <i>PLEKHA6</i>   | TSS200  |
| cg04937416 | 7  | 157,479,272 | 5.62E-10 | 0.423 | 0.459 |          |       |     | <i>PTPRN2</i>    | Body    |
| cg21549195 | 19 | 52,452,368  | 3.44E-05 | 0.423 | 0.461 |          |       |     |                  |         |
| cg18376288 | 1  | 8,181,555   | 1.3E-14  | 0.423 | 0.399 |          |       |     |                  |         |
| cg00763725 | X  | 154,842,689 | 6.64E-06 | 0.423 | 0.385 |          |       |     | <i>TMLHE</i>     | TSS200  |
| cg19954537 | 2  | 97,204,401  | 0.000225 | 0.423 | 0.433 |          |       |     | <i>ARID5A</i>    | Body    |
| cg15632826 | 6  | 31,831,740  | 1.83E-55 | 0.423 | 0.402 |          |       |     | <i>NEU1</i>      | TSS1500 |
| cg09729613 | 2  | 201,450,601 | 4.74E-07 | 0.423 | 0.371 |          |       |     | <i>AOX1</i>      | TSS200  |
| cg03667968 | 5  | 112,073,438 | 0.013784 | 0.423 | 0.237 |          |       |     | <i>APC</i>       | TSS200  |
| cg11228682 | 6  | 16,320,530  | 0.000487 | 0.422 | 0.516 |          |       |     | <i>ATXN1</i>     | Body    |
| cg10541755 | 3  | 170,625,872 | 8.86E-07 | 0.422 | 0.264 | 3.96E-41 | 0.351 |     | <i>EIF5A2</i>    | 5'UTR   |
| cg16629469 | 6  | 108,440,603 | 0.003131 | 0.422 | 0.429 |          |       |     |                  |         |
| cg06234063 | 12 | 65,219,392  | 5.32E-40 | 0.422 | 0.411 |          |       | Yes |                  |         |
| cg20557104 | 19 | 41,934,313  | 3.08E-23 | 0.422 | 0.445 | 2.29E-33 | 0.304 |     | <i>B3GNT8</i>    | 5'UTR   |
| cg08580254 | 17 | 38,478,807  | 9.2E-25  | 0.422 | 0.385 |          |       |     | <i>RARA</i>      | 5'UTR   |
| cg22116670 | 5  | 151,066,730 | 6.45E-20 | 0.422 | 0.430 |          |       |     | <i>SPARC</i>     | TSS1500 |
| cg25923609 | 5  | 3,607,092   | 7.67E-14 | 0.422 | 0.425 |          |       |     |                  |         |
| cg11617147 | 7  | 105,517,689 | 1.53E-05 | 0.422 | 0.236 |          |       |     | <i>ATXN7L1</i>   | TSS1500 |
| cg20693607 | 3  | 184,319,566 | 1.82E-05 | 0.422 | 0.317 |          |       |     |                  |         |
| cg05124021 | 7  | 157,487,066 | 3.65E-21 | 0.422 | 0.403 |          |       |     | <i>PTPRN2</i>    | Body    |
| cg21707172 | 6  | 155,537,944 | 2.04E-17 | 0.421 | 0.423 |          |       |     | <i>TIAM2</i>     | Body    |
| cg19423014 | 18 | 59,560,091  | 3.83E-12 | 0.421 | 0.347 | 9.33E-25 | 0.282 |     | <i>RNF152</i>    | 1stExon |
| cg18442524 | 5  | 137,610,372 | 0.001977 | 0.421 | 0.347 |          |       |     | <i>GFRA3</i>     | TSS200  |
| cg24980893 | 7  | 116,164,709 | 0.001185 | 0.421 | 0.347 |          |       |     | <i>CAV1</i>      | TSS200  |



|            |    |             |          |       |       |  |  |  |                 |         |
|------------|----|-------------|----------|-------|-------|--|--|--|-----------------|---------|
| cg11856897 | 1  | 47,998,999  | 6.2E-39  | 0.421 | 0.408 |  |  |  |                 |         |
| cg21422700 | 1  | 201,229,247 | 1.35E-34 | 0.421 | 0.404 |  |  |  |                 |         |
| cg26412532 | 10 | 103,881,068 | 2.71E-29 | 0.420 | 0.425 |  |  |  | <i>LDB1</i>     | TSS1500 |
| cg04380340 | 2  | 201,450,506 | 3.97E-06 | 0.420 | 0.373 |  |  |  | <i>AOX1</i>     | TSS1500 |
| cg03120555 | 7  | 630,473     | 1.32E-12 | 0.420 | 0.377 |  |  |  | <i>PRKAR1B</i>  | Body    |
| cg22871668 | 6  | 133,562,492 | 3.56E-05 | 0.420 | 0.526 |  |  |  | <i>EYA4</i>     | TSS200  |
| cg17851725 | 2  | 121,269,372 | 5.61E-32 | 0.420 | 0.390 |  |  |  |                 |         |
| cg01996714 | 20 | 3,220,839   | 3.96E-40 | 0.420 | 0.378 |  |  |  |                 |         |
| cg27636310 | 1  | 46,632,696  | 4.57E-08 | 0.420 | 0.454 |  |  |  |                 |         |
| cg14557510 | 2  | 122,042,345 | 1.19E-24 | 0.420 | 0.404 |  |  |  | <i>TFCP2L1</i>  | Body    |
| cg04109822 | 20 | 50,158,057  | 1.22E-07 | 0.420 | 0.412 |  |  |  | <i>NFATC2</i>   | Body    |
| cg19764345 | 3  | 57,198,797  | 1E-07    | 0.420 | 0.306 |  |  |  | <i>IL17RD</i>   | Body    |
| cg12448161 | 3  | 48,632,723  | 4.64E-08 | 0.420 | 0.399 |  |  |  | <i>COL7A1</i>   | TSS200  |
| cg22773555 | 11 | 830,233     | 3.17E-06 | 0.420 | 0.474 |  |  |  | <i>EFCAB4A</i>  | Body    |
| cg11400774 | 1  | 156,051,324 | 0.047686 | 0.420 | 0.213 |  |  |  | <i>MEX3A</i>    | Body    |
| cg25272143 | 11 | 62,211,990  | 1.48E-16 | 0.420 | 0.417 |  |  |  | <i>AHNAK</i>    | Body    |
| cg09641578 | 15 | 40,734,696  | 8.8E-34  | 0.420 | 0.404 |  |  |  | <i>BAHD1</i>    | 5'UTR   |
| cg02231729 | 15 | 89,438,611  | 0.001689 | 0.420 | 0.420 |  |  |  | <i>HAPLN3</i>   | 5'UTR   |
| cg15219228 | 6  | 35,479,628  | 0.002315 | 0.420 | 0.465 |  |  |  | <i>TULP1</i>    | Body    |
| cg23069167 | 3  | 61,550,379  | 5.86E-30 | 0.420 | 0.421 |  |  |  | <i>PTPRG</i>    | Body    |
| cg13490422 | 12 | 50,377,731  | 3.13E-36 | 0.420 | 0.406 |  |  |  |                 |         |
| cg13204538 | X  | 119,445,300 | 3.74E-14 | 0.420 | 0.384 |  |  |  | <i>FAM70A</i>   | 1stExon |
| cg03078363 | 12 | 54,408,664  | 1.31E-10 | 0.420 | 0.410 |  |  |  |                 |         |
| cg07696699 | 4  | 17,783,502  | 3.31E-07 | 0.420 | 0.443 |  |  |  | <i>FAM184B</i>  | TSS1500 |
| cg07816687 | 16 | 67,197,186  | 4.17E-05 | 0.419 | 0.501 |  |  |  | <i>HSF4</i>     | TSS200  |
| cg11097717 | 2  | 191,045,635 | 5.23E-18 | 0.419 | 0.379 |  |  |  | <i>C2orf88</i>  | 5'UTR   |
| cg02916102 | 15 | 74,658,244  | 5.99E-21 | 0.419 | 0.377 |  |  |  | <i>CYP11A1</i>  | 1stExon |
| cg26871372 | 4  | 41,867,517  | 0.000264 | 0.419 | 0.467 |  |  |  |                 |         |
| cg01025836 | 20 | 37,230,326  | 1.38E-19 | 0.419 | 0.418 |  |  |  | <i>C20orf95</i> | TSS1500 |
| cg11213690 | 7  | 149,112,402 | 3.06E-28 | 0.419 | 0.444 |  |  |  |                 |         |
| cg14133945 | 11 | 60,809,985  | 0.000978 | 0.419 | 0.284 |  |  |  |                 |         |
| cg01676962 | 8  | 91,997,001  | 9.28E-13 | 0.419 | 0.368 |  |  |  |                 |         |
| cg21537736 | X  | 149,534,089 | 3.82E-06 | 0.419 | 0.446 |  |  |  |                 |         |
| cg16162970 | 14 | 105,779,952 | 2.56E-27 | 0.419 | 0.420 |  |  |  | <i>PACS2</i>    | TSS1500 |

|            |    |             |          |       |       |          |       |     |                 |         |
|------------|----|-------------|----------|-------|-------|----------|-------|-----|-----------------|---------|
| cg20622056 | X  | 70,151,134  | 6.04E-23 | 0.419 | 0.394 | 6.41E-13 | 0.239 |     | <i>SLC7A3</i>   | TSS200  |
| cg01635086 | 17 | 42,386,326  | 8.17E-06 | 0.419 | 0.434 |          |       |     | <i>RUNDC3A</i>  | Body    |
| cg06744545 | 2  | 27,958,421  | 6.07E-05 | 0.419 | 0.326 |          |       |     |                 |         |
| cg18759209 | 20 | 55,842,071  | 1.43E-31 | 0.419 | 0.370 |          |       |     | <i>BMP7</i>     | TSS1500 |
| cg13722431 | 6  | 2,903,533   | 3.4E-14  | 0.419 | 0.380 |          |       |     | <i>SERPINB9</i> | 1stExon |
| cg20101352 | 7  | 29,186,234  | 1.25E-05 | 0.418 | 0.373 |          |       |     | <i>CPVL</i>     | TSS200  |
| cg14032025 | 20 | 50,721,129  | 1.22E-10 | 0.418 | 0.433 |          |       |     | <i>ZFP64</i>    | Body    |
| cg13934406 | 6  | 32,120,878  | 7.65E-10 | 0.418 | 0.439 |          |       |     | <i>PPT2</i>     | TSS1500 |
| cg00409917 | 6  | 29,894,679  | 7.55E-08 | 0.418 | 0.415 |          |       |     | <i>HCG4P6</i>   | TSS1500 |
| cg01614237 | 4  | 6,660,771   | 3.69E-07 | 0.418 | 0.429 |          |       |     |                 |         |
| cg15275625 | 3  | 13,343,118  | 1.58E-25 | 0.418 | 0.431 |          |       |     |                 |         |
| cg23624008 | 1  | 70,035,479  | 3.51E-05 | 0.418 | 0.404 |          |       |     |                 |         |
| cg13247663 | 8  | 59,058,254  | 8.75E-48 | 0.418 | 0.404 |          |       |     | <i>FAM110B</i>  | 5'UTR   |
| cg04557452 | 11 | 62,691,251  | 1.52E-09 | 0.418 | 0.386 |          |       |     |                 |         |
| cg01853276 | 2  | 24,162,441  | 0.000199 | 0.418 | 0.444 |          |       |     | <i>UBXN2A</i>   | TSS1500 |
| cg25020459 | 21 | 47,402,144  | 4.07E-07 | 0.418 | 0.404 | 1.62E-19 | 0.257 |     | <i>COL6A1</i>   | Body    |
| cg02896361 | X  | 47,441,581  | 0.002048 | 0.418 | 0.413 |          |       |     | <i>SYN1</i>     | Body    |
| cg22855900 | 5  | 72,529,662  | 3.66E-08 | 0.418 | 0.391 |          |       |     |                 |         |
| cg04889072 | 3  | 193,776,187 | 2.2E-16  | 0.418 | 0.376 |          |       |     |                 |         |
| cg08320659 | 6  | 26,088,202  | 9.69E-05 | 0.418 | 0.387 |          |       |     | <i>HFE</i>      | Body    |
| cg02534363 | 3  | 47,050,950  | 6.54E-08 | 0.418 | 0.355 |          |       |     | <i>NBEAL2</i>   | 3'UTR   |
| cg06711837 | X  | 137,792,814 | 3.46E-14 | 0.417 | 0.317 |          |       |     | <i>FGF13</i>    | Body    |
| cg01518607 | 6  | 27,235,891  | 0.000347 | 0.417 | 0.518 |          |       |     |                 |         |
| cg03159396 | 6  | 50,808,813  | 1.72E-06 | 0.417 | 0.441 |          |       |     | <i>TFAP2B</i>   | Body    |
| cg07777008 | 11 | 27,015,808  | 4.13E-13 | 0.417 | 0.424 |          |       |     | <i>FIBIN</i>    | 5'UTR   |
| cg23083672 | X  | 13,587,603  | 1.72E-17 | 0.417 | 0.418 | 2.18E-18 | 0.263 |     | <i>EGFL6</i>    | TSS200  |
| cg22902400 | 22 | 39,473,197  | 8.5E-13  | 0.417 | 0.408 |          |       |     | <i>APOBEC3G</i> | 5'UTR   |
| cg10119075 | 10 | 7,709,738   | 1.28E-21 | 0.417 | 0.400 |          |       |     | <i>ITIH5</i>    | TSS1500 |
| cg22222281 | 12 | 6,308,758   | 1.52E-19 | 0.417 | 0.383 |          |       |     | <i>CD9</i>      | TSS1500 |
| cg12153794 | 12 | 115,131,549 | 1.65E-09 | 0.417 | 0.441 |          |       | Yes |                 |         |
| cg26107890 | 3  | 124,860,686 | 3.59E-07 | 0.417 | 0.419 |          |       |     | <i>SLC12A8</i>  | Body    |
| cg08396863 | 2  | 220,117,599 | 7.77E-25 | 0.417 | 0.417 |          |       |     | <i>TUBA4B</i>   | TSS1500 |
| cg16515238 | X  | 119,444,909 | 0.002807 | 0.417 | 0.288 |          |       |     | <i>FAM70A</i>   | Body    |
| cg22598028 | 3  | 44,626,492  | 1.12E-06 | 0.417 | 0.264 | 2.86E-11 | 0.211 |     | <i>ZNF660</i>   | 5'UTR   |

|            |    |             |          |       |       |          |       |  |          |         |
|------------|----|-------------|----------|-------|-------|----------|-------|--|----------|---------|
| cg14095438 | 8  | 49,468,684  | 1.42E-11 | 0.417 | 0.366 |          |       |  |          |         |
| cg17239057 | 1  | 224,363,575 | 1.18E-20 | 0.417 | 0.411 |          |       |  |          |         |
| cg03774468 | 3  | 140,950,104 | 5.3E-05  | 0.417 | 0.371 |          |       |  | ACPL2    | TSS1500 |
| cg01821058 | 16 | 55,512,870  | 4.07E-06 | 0.416 | 0.378 |          |       |  | MMP2     | TSS1500 |
| cg06443533 | 1  | 1,182,424   | 0.001561 | 0.416 | 0.423 |          |       |  | FAM132A  | TSS1500 |
| cg14553740 | 9  | 18,976,715  | 4.35E-16 | 0.416 | 0.363 |          |       |  | FAM154A  | Body    |
| cg01340542 | 1  | 65,468,273  | 2.42E-11 | 0.416 | 0.320 |          |       |  |          |         |
| cg01655356 | 11 | 70,672,841  | 1.67E-33 | 0.416 | 0.400 |          |       |  | SHANK2   | Body    |
| cg04448487 | 20 | 42,875,777  | 4.25E-08 | 0.416 | 0.273 | 5.32E-26 | 0.319 |  | GDAP1L1  | TSS200  |
| cg16562730 | 16 | 71,560,187  | 1.05E-15 | 0.416 | 0.376 |          |       |  | CHST4    | 1stExon |
| cg14318199 | X  | 12,974,511  | 4.4E-07  | 0.416 | 0.403 |          |       |  |          |         |
| cg23130010 | 6  | 29,855,462  | 2.73E-21 | 0.416 | 0.356 |          |       |  | HLA-H    | Body    |
| cg03049782 | 17 | 41,363,891  | 3.28E-22 | 0.416 | 0.390 |          |       |  | TMEM106A | TSS200  |
| cg07091016 | 1  | 36,174,005  | 2.96E-07 | 0.416 | 0.299 |          |       |  |          |         |
| cg22761670 | 17 | 74,268,201  | 0.003564 | 0.416 | 0.474 |          |       |  |          |         |
| cg12627583 | 2  | 201,450,731 | 7.19E-05 | 0.416 | 0.365 | 8.96E-25 | 0.304 |  | AOX1     | 1stExon |
| cg18881873 | 20 | 52,276,947  | 4.17E-11 | 0.416 | 0.429 |          |       |  |          |         |
| cg08266417 | 2  | 201,450,575 | 7.5E-05  | 0.416 | 0.367 |          |       |  | AOX1     | TSS200  |
| cg12277627 | X  | 129,245,225 | 3.25E-06 | 0.416 | 0.324 |          |       |  | ELF4     | TSS1500 |
| cg07402729 | 11 | 61,062,902  | 5.91E-13 | 0.416 | 0.353 |          |       |  | VWCE     | TSS200  |
| cg11122493 | 17 | 74,706,551  | 0.003325 | 0.415 | 0.315 |          |       |  | MXRA7    | Body    |
| cg08918274 | 10 | 17,270,300  | 5.78E-09 | 0.415 | 0.412 |          |       |  | VIM      | 5'UTR   |
| cg20785674 | 1  | 150,123,490 | 9.94E-22 | 0.415 | 0.384 |          |       |  | PLEKHO1  | Body    |
| cg07602744 | 7  | 157,484,164 | 5.74E-18 | 0.415 | 0.406 |          |       |  | PTPRN2   | Body    |
| cg00507008 | 12 | 115,131,421 | 6.22E-07 | 0.415 | 0.447 |          |       |  |          |         |
| cg21932800 | X  | 135,056,858 | 1.47E-14 | 0.415 | 0.347 | 8.87E-31 | 0.209 |  | MMGT1    | TSS1500 |
| cg01335367 | 12 | 110,172,208 | 9.92E-27 | 0.415 | 0.404 |          |       |  | MGC14436 | Body    |
| cg18363192 | 6  | 31,831,434  | 1.87E-15 | 0.415 | 0.399 |          |       |  | NEU1     | TSS1500 |
| cg08096786 | 16 | 57,571,099  | 6.16E-06 | 0.415 | 0.368 |          |       |  | CCDC102A | TSS1500 |
| cg14488317 | 11 | 3,181,446   | 1.32E-37 | 0.415 | 0.406 |          |       |  | OSBPL5   | 5'UTR   |
| cg01373189 | 13 | 33,002,820  | 8.64E-16 | 0.415 | 0.392 |          |       |  | N4BP2L1  | TSS1500 |
| cg06092265 | 12 | 65,219,655  | 4.76E-74 | 0.415 | 0.409 |          |       |  |          |         |
| cg04920358 | 8  | 49,468,800  | 1.11E-05 | 0.415 | 0.398 |          |       |  |          |         |
| cg05542338 | 4  | 5,710,407   | 0.000111 | 0.415 | 0.330 |          |       |  | EVC2     | 5'UTR   |

|            |    |             |          |       |       |          |       |  |                 |         |
|------------|----|-------------|----------|-------|-------|----------|-------|--|-----------------|---------|
| cg03340649 | 3  | 44,626,453  | 4.5E-11  | 0.415 | 0.297 |          |       |  | <i>ZNF660</i>   | TSS200  |
| cg02264990 | 12 | 54,447,243  | 3.06E-27 | 0.415 | 0.407 |          |       |  | <i>HOXC4</i>    | 5'UTR   |
| cg17246140 | 2  | 43,020,264  | 1.87E-54 | 0.415 | 0.392 |          |       |  | <i>HAAO</i>     | TSS1500 |
| cg23740882 | 20 | 44,098,387  | 2.98E-06 | 0.415 | 0.282 |          |       |  | <i>WFDC2</i>    | TSS200  |
| cg24144083 | 3  | 36,805,814  | 1.98E-08 | 0.414 | 0.415 |          |       |  |                 |         |
| cg10513702 | 1  | 200,003,800 | 3.9E-08  | 0.414 | 0.400 |          |       |  | <i>NR5A2</i>    | Body    |
| cg17397592 | 2  | 237,416,338 | 1.98E-08 | 0.414 | 0.380 |          |       |  | <i>IQCA1</i>    | TSS1500 |
| cg01908462 | 4  | 184,718,215 | 1.94E-08 | 0.414 | 0.395 |          |       |  |                 |         |
| cg18531004 | 3  | 128,564,980 | 1.46E-08 | 0.414 | 0.364 |          |       |  |                 |         |
| cg05452406 | 6  | 10,881,891  | 8.78E-23 | 0.414 | 0.393 |          |       |  | <i>GCM2</i>     | Body    |
| cg10510586 | X  | 68,348,597  | 1.91E-06 | 0.414 | 0.469 |          |       |  |                 |         |
| cg20162652 | 12 | 66,629,018  | 9.61E-17 | 0.414 | 0.406 |          |       |  | <i>IRAK3</i>    | Body    |
| cg03475285 | 8  | 54,789,207  | 5.74E-27 | 0.414 | 0.417 |          |       |  | <i>RGS20</i>    | Body    |
| cg22369786 | 13 | 80,911,626  | 5.26E-06 | 0.414 | 0.406 |          |       |  | <i>SPRY2</i>    | Body    |
| cg14088357 | 19 | 46,800,338  | 1.74E-35 | 0.414 | 0.407 |          |       |  | <i>HIF3A</i>    | TSS1500 |
| cg11543592 | 12 | 115,124,067 | 3.85E-17 | 0.413 | 0.391 |          |       |  |                 |         |
| cg06334134 | 7  | 142,986,693 | 1.47E-23 | 0.413 | 0.365 |          |       |  | <i>CASP2</i>    | Body    |
| cg23839159 | 1  | 43,281,794  | 2.08E-22 | 0.413 | 0.407 |          |       |  | <i>CCDC23</i>   | Body    |
| cg10030843 | 12 | 115,303,226 | 1.1E-24  | 0.413 | 0.397 |          |       |  |                 |         |
| cg00755063 | 19 | 13,275,288  | 5.06E-17 | 0.413 | 0.327 |          |       |  |                 |         |
| cg14914046 | 6  | 32,223,098  | 2.43E-10 | 0.413 | 0.385 |          |       |  |                 |         |
| cg13420364 | 1  | 234,857,659 | 2.91E-25 | 0.413 | 0.395 |          |       |  |                 |         |
| cg24645214 | 8  | 54,789,978  | 3.61E-15 | 0.413 | 0.404 |          |       |  | <i>RGS20</i>    | Body    |
| cg26149167 | 19 | 16,187,889  | 0.002439 | 0.413 | 0.390 |          |       |  | <i>TPM4</i>     | Body    |
| cg12317414 | 10 | 75,407,991  | 1.23E-28 | 0.413 | 0.394 |          |       |  | <i>SYNPO2L</i>  | Body    |
| cg11638117 | X  | 139,587,335 | 0.001649 | 0.413 | 0.531 |          |       |  | <i>SOX3</i>     | TSS200  |
| cg13625875 | 4  | 54,959,419  | 2.4E-15  | 0.413 | 0.377 |          |       |  |                 |         |
| cg08730348 | 16 | 31,214,307  | 3.2E-13  | 0.412 | 0.289 |          |       |  | <i>PYCARD</i>   | TSS200  |
| cg03304815 | 3  | 134,083,139 | 3.98E-30 | 0.412 | 0.430 |          |       |  | <i>AMOTL2</i>   | Body    |
| cg03376794 | 16 | 25,704,507  | 6.59E-10 | 0.412 | 0.423 |          |       |  | <i>HS3ST4</i>   | Body    |
| cg18060199 | 1  | 94,146,495  | 1.98E-14 | 0.412 | 0.373 | 4.61E-27 | 0.211 |  | <i>BCAR3</i>    | 5'UTR   |
| cg18542056 | 19 | 51,523,205  | 8.51E-17 | 0.412 | 0.414 |          |       |  | <i>KLK10</i>    | 5'UTR   |
| cg13221363 | 2  | 12,859,103  | 5.95E-06 | 0.412 | 0.478 |          |       |  | <i>TRIB2</i>    | Body    |
| cg05168015 | 5  | 171,880,461 | 9.52E-23 | 0.412 | 0.411 |          |       |  | <i>SH3PXD2B</i> | Body    |

|            |    |             |          |       |       |          |       |  |                   |         |
|------------|----|-------------|----------|-------|-------|----------|-------|--|-------------------|---------|
| cg25801701 | 4  | 54,959,548  | 2.3E-12  | 0.412 | 0.432 |          |       |  |                   |         |
| cg20927242 | 6  | 29,692,011  | 8.11E-11 | 0.412 | 0.400 |          |       |  | <i>HLA-F</i>      | Body    |
| cg18132916 | 6  | 79,620,363  | 1.07E-07 | 0.412 | 0.433 |          |       |  |                   |         |
| cg12911763 | 11 | 125,133,335 | 1.09E-17 | 0.412 | 0.405 |          |       |  | <i>PKNOX2</i>     | 5'UTR   |
| cg07961015 | 5  | 1,876,215   | 8.1E-15  | 0.412 | 0.401 |          |       |  |                   |         |
| cg24302235 | 3  | 170,746,073 | 1.22E-09 | 0.412 | 0.381 |          |       |  | <i>SLC2A2</i>     | TSS1500 |
| cg26250609 | 11 | 67,351,273  | 1.32E-70 | 0.412 | 0.416 |          |       |  | <i>GSTP1</i>      | 1stExon |
| cg13804182 | 6  | 30,711,796  | 8.04E-09 | 0.412 | 0.430 |          |       |  | <i>FLOT1</i>      | TSS1500 |
| cg21606115 | 7  | 157,361,752 | 1.47E-25 | 0.412 | 0.399 |          |       |  | <i>PTPRN2</i>     | Body    |
| cg26621770 | 12 | 115,131,447 | 6.59E-09 | 0.412 | 0.420 |          |       |  |                   |         |
| cg12177793 | 14 | 24,837,892  | 0.000236 | 0.411 | 0.395 |          |       |  | <i>NFATC4</i>     | Body    |
| cg14518209 | 5  | 151,066,268 | 7.52E-19 | 0.411 | 0.454 |          |       |  | <i>SPARC</i>      | 5'UTR   |
| cg14553243 | 2  | 219,646,657 | 0.000597 | 0.411 | 0.293 |          |       |  | <i>CYP27A1</i>    | 5'UTR   |
| cg19113375 | 9  | 98,784,351  | 2.94E-09 | 0.411 | 0.299 |          |       |  | <i>NCRNA00092</i> | TSS1500 |
| cg00059652 | 17 | 67,605,498  | 4.2E-20  | 0.411 | 0.378 |          |       |  |                   |         |
| cg03079733 | 21 | 43,183,466  | 7.15E-21 | 0.411 | 0.401 |          |       |  | <i>RIPK4</i>      | Body    |
| cg20556517 | 19 | 18,540,330  | 1.31E-07 | 0.411 | 0.273 |          |       |  | <i>SSBP4</i>      | Body    |
| cg05915293 | 16 | 2,041,512   | 9.76E-09 | 0.411 | 0.416 |          |       |  | <i>SYNGR3</i>     | Body    |
| cg06537680 | 16 | 67,204,316  | 5.48E-05 | 0.411 | 0.452 |          |       |  |                   |         |
| cg00734904 | 17 | 55,888,454  | 5.76E-40 | 0.411 | 0.398 |          |       |  |                   |         |
| cg20092531 | 18 | 54,789,058  | 9.64E-05 | 0.411 | 0.334 |          |       |  |                   |         |
| cg00330929 | 19 | 2,282,010   | 4.27E-07 | 0.411 | 0.343 |          |       |  | <i>C19orf35</i>   | 5'UTR   |
| cg23272399 | 1  | 53,068,579  | 1.27E-08 | 0.411 | 0.318 |          |       |  | <i>GPX7</i>       | Body    |
| cg26205652 | 12 | 48,591,994  | 8.3E-05  | 0.410 | 0.416 |          |       |  |                   |         |
| cg19640166 | 10 | 106,088,711 | 0.000513 | 0.410 | 0.446 |          |       |  | <i>ITPRIP</i>     | 5'UTR   |
| cg07836831 | 1  | 2,460,865   | 1.37E-15 | 0.410 | 0.428 |          |       |  | <i>HES5</i>       | 3'UTR   |
| cg08924430 | 4  | 106,067,052 | 1.03E-10 | 0.410 | 0.299 | 2.84E-38 | 0.275 |  | <i>TET2</i>       | TSS1500 |
| cg16523424 | X  | 47,441,779  | 3.3E-05  | 0.410 | 0.408 | 3.27E-18 | 0.108 |  | <i>SYN1</i>       | Body    |
| cg04743654 | 3  | 50,378,292  | 1.26E-07 | 0.410 | 0.392 |          |       |  | <i>RASSF1</i>     | 5'UTR   |
| cg06632214 | 11 | 314,074     | 0.000161 | 0.410 | 0.228 |          |       |  | <i>IFITM1</i>     | 1stExon |
| cg12053769 | 1  | 2,461,413   | 3.03E-27 | 0.410 | 0.403 |          |       |  | <i>HES5</i>       | Body    |
| cg03191045 | 20 | 36,040,903  | 0.000177 | 0.410 | 0.498 |          |       |  |                   |         |
| cg21604803 | 19 | 50,194,662  | 7.88E-05 | 0.409 | 0.306 | 2.03E-10 | 0.214 |  | <i>CPT1C</i>      | 5'UTR   |
| cg08946731 | 7  | 32,981,826  | 2.88E-06 | 0.409 | 0.201 |          |       |  | <i>RP9P</i>       | Body    |

|            |    |             |          |       |       |          |       |  |                 |         |
|------------|----|-------------|----------|-------|-------|----------|-------|--|-----------------|---------|
| cg02865822 | 11 | 46,383,141  | 5E-32    | 0.409 | 0.395 |          |       |  | <i>DGKZ</i>     | Body    |
| cg20229534 | 6  | 10,882,250  | 0.000337 | 0.409 | 0.441 |          |       |  | <i>GCM2</i>     | TSS200  |
| cg11682697 | 1  | 56,992,372  | 9.01E-22 | 0.409 | 0.410 |          |       |  | <i>PPAP2B</i>   | Body    |
| cg13570656 | 15 | 75,019,196  | 7.68E-16 | 0.409 | 0.390 |          |       |  | <i>CYP1A1</i>   | TSS1500 |
| cg04109898 | 6  | 29,943,455  | 3.86E-07 | 0.409 | 0.396 |          |       |  | <i>HCG9</i>     | Body    |
| cg14502484 | 5  | 1,446,208   | 2.07E-26 | 0.409 | 0.372 |          |       |  | <i>SLC6A3</i>   | TSS1500 |
| cg23489273 | 6  | 29,910,292  | 8.59E-51 | 0.409 | 0.376 |          |       |  | <i>HLA-A</i>    | TSS200  |
| cg26955987 | 12 | 3,862,457   | 0.013211 | 0.409 | 0.290 |          |       |  | <i>EFCAB4B</i>  | TSS200  |
| cg18108623 | 17 | 33,701,321  | 2.95E-14 | 0.409 | 0.417 | 5.26E-28 | 0.254 |  | <i>SLFN11</i>   | TSS1500 |
| cg03085312 | 17 | 38,465,281  | 7.11E-32 | 0.409 | 0.398 | 2.75E-38 | 0.266 |  | <i>RARA</i>     | TSS200  |
| cg09720701 | 12 | 54,447,283  | 9.21E-10 | 0.409 | 0.346 |          |       |  | <i>HOXC4</i>    | 5'UTR   |
| cg00758229 | 3  | 25,469,148  | 2.62E-11 | 0.409 | 0.359 |          |       |  | <i>RARB</i>     | TSS1500 |
| cg15052447 | 17 | 74,696,872  | 5.18E-07 | 0.409 | 0.448 |          |       |  | <i>MXRA7</i>    | Body    |
| cg26386409 | 12 | 63,025,771  | 0.000205 | 0.409 | 0.332 |          |       |  |                 |         |
| cg06100756 | 17 | 43,221,575  | 2.31E-23 | 0.408 | 0.356 |          |       |  |                 |         |
| cg14432143 | 6  | 29,975,061  | 8.54E-09 | 0.408 | 0.384 |          |       |  | <i>HLA-J</i>    | Body    |
| cg09172548 | 12 | 3,862,221   | 0.025701 | 0.408 | 0.290 |          |       |  | <i>EFCAB4B</i>  | 1stExon |
| cg19414967 | 8  | 49,468,296  | 5.41E-25 | 0.408 | 0.414 |          |       |  |                 |         |
| cg21327343 | X  | 56,258,579  | 1.2E-08  | 0.408 | 0.344 |          |       |  | <i>KLF8</i>     | TSS1500 |
| cg03679544 | 6  | 155,537,972 | 1.45E-11 | 0.408 | 0.405 |          |       |  | <i>TIAM2</i>    | Body    |
| cg27021986 | 15 | 41,805,273  | 2.72E-20 | 0.408 | 0.431 |          |       |  | <i>LTK</i>      | Body    |
| cg18450254 | 3  | 64,200,005  | 2.65E-15 | 0.408 | 0.397 |          |       |  | <i>PRICKLE2</i> | 5'UTR   |
| cg26260038 | 4  | 16,085,716  | 1.52E-32 | 0.408 | 0.394 |          |       |  | <i>PROM1</i>    | TSS200  |
| cg22272840 | 8  | 10,586,882  | 5.4E-11  | 0.408 | 0.398 |          |       |  | <i>SOX7</i>     | Body    |
| cg14210694 | 2  | 191,045,632 | 2.79E-14 | 0.408 | 0.364 |          |       |  | <i>C2orf88</i>  | 5'UTR   |
| cg00260634 | 2  | 219,847,233 | 2.04E-30 | 0.408 | 0.423 |          |       |  | <i>FEV</i>      | Body    |
| cg19423622 | 7  | 158,362,729 | 1.02E-36 | 0.408 | 0.413 |          |       |  | <i>PTPRN2</i>   | Body    |
| cg18094781 | 3  | 25,469,430  | 6.09E-34 | 0.408 | 0.386 |          |       |  | <i>RARB</i>     | TSS1500 |
| cg09025501 | 16 | 88,717,472  | 1.87E-12 | 0.408 | 0.394 |          |       |  | <i>CYBA</i>     | TSS200  |
| cg18403673 | 11 | 63,828,569  | 1.8E-26  | 0.408 | 0.411 |          |       |  | <i>MACROD1</i>  | Body    |
| cg14547067 | 11 | 46,317,154  | 0.000544 | 0.408 | 0.328 |          |       |  | <i>CREB3L1</i>  | Body    |
| cg26668837 | 11 | 8,615,356   | 7.92E-13 | 0.408 | 0.375 |          |       |  | <i>STK33</i>    | 1stExon |
| cg09549813 | 16 | 4,587,862   | 5.5E-39  | 0.407 | 0.419 |          |       |  | <i>C16orf5</i>  | 5'UTR   |
| cg09275704 | 16 | 54,317,042  | 1.47E-18 | 0.407 | 0.373 |          |       |  |                 |         |

|             |    |             |          |       |       |          |       |  |                   |         |
|-------------|----|-------------|----------|-------|-------|----------|-------|--|-------------------|---------|
| cg06404175  | 20 | 3,052,692   | 0.000991 | 0.407 | 0.349 |          |       |  | <i>OXT</i>        | Body    |
| cg14250833  | 6  | 10,882,240  | 0.003205 | 0.407 | 0.474 |          |       |  | <i>GCM2</i>       | TSS200  |
| cg01814945  | 6  | 29,974,723  | 2.1E-08  | 0.407 | 0.407 |          |       |  | <i>HLA-J</i>      | Body    |
| cg01622437  | 12 | 115,136,246 | 7.79E-26 | 0.407 | 0.391 |          |       |  |                   |         |
| cg08412913  | 16 | 85,429,522  | 2.37E-13 | 0.407 | 0.327 |          |       |  |                   |         |
| cg19714985  | 10 | 77,043,608  | 2.57E-10 | 0.407 | 0.433 |          |       |  |                   |         |
| cg251110734 | 5  | 149,535,650 | 4.04E-42 | 0.407 | 0.374 |          |       |  | <i>PDGFRB</i>     | TSS1500 |
| cg25614853  | X  | 149,534,258 | 8.38E-10 | 0.407 | 0.346 |          |       |  |                   |         |
| cg18241962  | 17 | 75,385,432  | 7.96E-16 | 0.407 | 0.396 |          |       |  | <i>SEPT9</i>      | 5'UTR   |
| cg18322546  | 14 | 77,422,738  | 8.39E-10 | 0.407 | 0.351 |          |       |  |                   |         |
| cg23180938  | 5  | 115,152,485 | 0.000889 | 0.407 | 0.231 |          |       |  | <i>CDO1</i>       | TSS200  |
| cg18690729  | 10 | 128,250,156 | 9.9E-05  | 0.407 | 0.357 |          |       |  |                   |         |
| cg17235702  | 7  | 54,956,419  | 1.84E-08 | 0.406 | 0.379 |          |       |  |                   |         |
| cg15336765  | 12 | 50,355,307  | 1.36E-11 | 0.406 | 0.348 |          |       |  | <i>AQP5</i>       | 1stExon |
| cg12077963  | 17 | 4,079,306   | 1.39E-16 | 0.406 | 0.381 |          |       |  | <i>ANKFY1</i>     | Body    |
| cg15804105  | 6  | 26,172,302  | 0.000374 | 0.406 | 0.478 |          |       |  |                   |         |
| cg00980978  | 20 | 44,098,724  | 4.9E-06  | 0.406 | 0.285 | 2.39E-18 | 0.208 |  | <i>WFDC2</i>      | Body    |
| cg03796321  | 15 | 86,162,442  | 2.59E-09 | 0.406 | 0.385 |          |       |  | <i>AKAP13</i>     | Body    |
| cg06426416  | 4  | 5,710,403   | 1.16E-05 | 0.406 | 0.291 |          |       |  | <i>EVC2</i>       | 5'UTR   |
| cg09017619  | 7  | 27,196,320  | 0.000002 | 0.406 | 0.404 |          |       |  | <i>HOXA7</i>      | TSS200  |
| cg04890459  | 16 | 67,204,681  | 2.61E-05 | 0.406 | 0.424 |          |       |  |                   |         |
| cg25200152  | 1  | 147,790,458 | 2.5E-08  | 0.406 | 0.360 |          |       |  |                   |         |
| cg27538686  | 1  | 76,540,641  | 2.66E-12 | 0.406 | 0.335 |          |       |  | <i>ST6GALNAC3</i> | Body    |
| cg03867465  | 4  | 183,062,301 | 1.19E-16 | 0.406 | 0.376 |          |       |  | <i>MGC45800</i>   | Body    |
| cg01414687  | 1  | 31,846,873  | 0.006862 | 0.406 | 0.216 |          |       |  | <i>FABP3</i>      | TSS1500 |
| cg09535960  | 8  | 23,193,704  | 1.18E-19 | 0.406 | 0.386 |          |       |  | <i>LOXL2</i>      | Body    |
| cg15255584  | X  | 8,698,502   | 0.000828 | 0.406 | 0.291 |          |       |  | <i>KAL1</i>       | Body    |
| cg08548396  | 6  | 30,095,549  | 6.52E-05 | 0.406 | 0.413 |          |       |  |                   |         |
| cg19653212  | 6  | 42,145,954  | 1.54E-05 | 0.406 | 0.466 |          |       |  | <i>GUCA1A</i>     | Body    |
| cg08750951  | 4  | 89,378,894  | 0.002084 | 0.406 | 0.222 |          |       |  | <i>HERC5</i>      | Body    |
| cg14724419  | 11 | 111,178,990 | 2.73E-07 | 0.406 | 0.420 |          |       |  | <i>C11orf93</i>   | Body    |
| cg26066597  | 14 | 21,540,022  | 1.32E-19 | 0.406 | 0.337 |          |       |  | <i>FLJ10357</i>   | Body    |
| cg23166865  | 1  | 63,539,729  | 6.81E-08 | 0.406 | 0.376 |          |       |  |                   |         |
| cg25378916  | 5  | 1,875,013   | 1.88E-13 | 0.406 | 0.409 |          |       |  |                   |         |

|            |    |             |          |       |       |          |       |  |                 |         |
|------------|----|-------------|----------|-------|-------|----------|-------|--|-----------------|---------|
| cg04507515 | 11 | 74,178,268  | 0.000593 | 0.405 | 0.305 |          |       |  | <i>KCNE3</i>    | 5'UTR   |
| cg13999188 | 2  | 175,548,310 | 1.54E-06 | 0.405 | 0.288 |          |       |  | <i>WIPF1</i>    | TSS1500 |
| cg22455450 | 19 | 53,038,972  | 4.57E-10 | 0.405 | 0.385 |          |       |  | <i>ZNF808</i>   | 5'UTR   |
| cg21334513 | 6  | 30,095,248  | 1.13E-18 | 0.405 | 0.422 |          |       |  |                 |         |
| cg05372113 | 19 | 41,595,975  | 3.87E-24 | 0.405 | 0.386 |          |       |  | <i>CYP2A13</i>  | Body    |
| cg23609985 | 1  | 119,870,339 | 1.18E-13 | 0.405 | 0.339 |          |       |  |                 |         |
| cg09183124 | 1  | 173,092,323 | 1.28E-28 | 0.405 | 0.377 |          |       |  |                 |         |
| cg13283765 | 2  | 200,853,063 | 6.86E-13 | 0.405 | 0.435 |          |       |  |                 |         |
| cg26119367 | 2  | 17,699,620  | 0.000371 | 0.405 | 0.444 |          |       |  | <i>RAD51AP2</i> | 1stExon |
| cg23350336 | 10 | 70,321,554  | 4.12E-10 | 0.405 | 0.388 |          |       |  | <i>TET1</i>     | 5'UTR   |
| cg16364121 | 17 | 35,291,924  | 1.34E-05 | 0.405 | 0.440 |          |       |  |                 |         |
| cg02051239 | 2  | 74,375,507  | 1.06E-26 | 0.405 | 0.349 |          |       |  | <i>BOLA3</i>    | TSS1500 |
| cg26319579 | 6  | 35,466,014  | 1.12E-18 | 0.405 | 0.416 |          |       |  | <i>TULP1</i>    | 3'UTR   |
| cg04804377 | 2  | 17,699,746  | 0.02217  | 0.405 | 0.425 |          |       |  | <i>RAD51AP2</i> | TSS200  |
| cg14287112 | 6  | 133,562,485 | 4.86E-06 | 0.405 | 0.489 |          |       |  | <i>EYA4</i>     | TSS200  |
| cg16670497 | 1  | 110,210,913 | 8.46E-16 | 0.405 | 0.364 | 3.06E-12 | 0.226 |  | <i>GSTM2</i>    | Body    |
| cg00310940 | 1  | 9,129,648   | 5.66E-31 | 0.405 | 0.361 |          |       |  | <i>SLC2A5</i>   | 5'UTR   |
| cg23880581 | 15 | 78,912,387  | 4.97E-18 | 0.405 | 0.345 |          |       |  | <i>CHRNA3</i>   | Body    |
| cg26010734 | 19 | 15,344,046  | 6E-07    | 0.404 | 0.379 |          |       |  | <i>EPHX3</i>    | TSS200  |
| cg02054792 | 2  | 106,014,950 | 3.27E-05 | 0.404 | 0.455 |          |       |  | <i>FHL2</i>     | 5'UTR   |
| cg00506343 | 12 | 54,421,033  | 1.86E-11 | 0.404 | 0.330 |          |       |  | <i>HOXC4</i>    | 5'UTR   |
| cg01392772 | 17 | 53,342,740  | 1.45E-05 | 0.404 | 0.389 |          |       |  | <i>HLF</i>      | 5'UTR   |
| cg20145692 | 1  | 40,781,289  | 3.72E-06 | 0.404 | 0.381 |          |       |  | <i>COL9A2</i>   | Body    |
| cg00447833 | 8  | 30,243,260  | 6.43E-10 | 0.404 | 0.319 |          |       |  | <i>RPMS</i>     | Body    |
| cg09143713 | 20 | 9,141,615   | 1.96E-09 | 0.404 | 0.391 |          |       |  | <i>PLCB4</i>    | 5'UTR   |
| cg26206183 | 14 | 24,457,993  | 1.68E-21 | 0.404 | 0.411 |          |       |  | <i>DHRS4L2</i>  | TSS200  |
| cg12265829 | 14 | 24,804,022  | 7.58E-12 | 0.404 | 0.420 | 1.74E-19 | 0.287 |  | <i>ADCY4</i>    | TSS200  |
| cg07561894 | 19 | 18,540,208  | 8.81E-07 | 0.404 | 0.257 |          |       |  | <i>SSBP4</i>    | Body    |
| cg06899186 | 7  | 148,394,994 | 2.89E-05 | 0.404 | 0.261 |          |       |  | <i>CUL1</i>     | TSS1500 |
| cg26105015 | 3  | 122,745,099 | 2.03E-20 | 0.404 | 0.388 |          |       |  | <i>SEMA5B</i>   | 5'UTR   |
| cg08790676 | 17 | 15,686,438  | 7.88E-05 | 0.404 | 0.369 |          |       |  |                 |         |
| cg26272220 | 12 | 81,471,884  | 6.01E-05 | 0.404 | 0.379 |          |       |  | <i>ACSS3</i>    | 1stExon |
| cg02303897 | 12 | 53,268,136  | 0.014879 | 0.404 | 0.315 |          |       |  |                 |         |
| cg25568066 | 5  | 126,205,045 | 1.16E-34 | 0.404 | 0.403 |          |       |  | <i>MARCH3</i>   | 3'UTR   |



|            |    |             |          |       |       |          |       |     |                |         |
|------------|----|-------------|----------|-------|-------|----------|-------|-----|----------------|---------|
| cg05661282 | 19 | 58,220,370  | 9.31E-08 | 0.404 | 0.344 |          |       |     | <i>ZNF154</i>  | 5'UTR   |
| cg26670562 | 4  | 86,954,105  | 8.17E-24 | 0.403 | 0.380 |          |       |     | <i>MAPK10</i>  | Body    |
| cg01005439 | 16 | 67,204,010  | 1.4E-06  | 0.403 | 0.438 |          |       |     |                |         |
| cg04367486 | 3  | 112,051,991 | 0.004363 | 0.403 | 0.483 |          |       |     | <i>CD200</i>   | 1stExon |
| cg25720815 | 6  | 29,974,692  | 6.07E-08 | 0.403 | 0.406 |          |       |     | <i>HLA-J</i>   | Body    |
| cg08668790 | 19 | 58,220,662  | 2.07E-12 | 0.403 | 0.363 | 2.25E-21 | 0.287 |     | <i>ZNF154</i>  | TSS200  |
| cg03030717 | 12 | 65,218,069  | 0.012416 | 0.403 | 0.105 |          |       |     |                |         |
| cg17537073 | 13 | 24,902,500  | 0.004885 | 0.403 | 0.369 |          |       |     |                |         |
| cg27608999 | 10 | 45,914,276  | 1.89E-12 | 0.403 | 0.370 |          |       |     | <i>ALOX5</i>   | Body    |
| cg01240056 | 7  | 1,263,927   | 2.32E-09 | 0.403 | 0.416 |          |       |     |                |         |
| cg05471296 | 7  | 27,196,302  | 6.73E-10 | 0.403 | 0.419 |          |       |     | <i>HOXA7</i>   | TSS200  |
| cg15732502 | 10 | 93,647,300  | 4.66E-05 | 0.403 | 0.337 |          |       |     |                |         |
| cg26655340 | 5  | 154,230,141 | 1.89E-30 | 0.403 | 0.385 |          |       |     | <i>C5orf4</i>  | 5'UTR   |
| cg02215070 | 7  | 134,144,055 | 0.002207 | 0.403 | 0.256 |          |       |     | <i>AKR1B1</i>  | TSS200  |
| cg06905453 | 19 | 14,089,284  | 8.87E-15 | 0.403 | 0.375 |          |       |     | <i>RFX1</i>    | Body    |
| cg11155687 | 12 | 63,025,589  | 4.23E-09 | 0.403 | 0.312 |          |       |     |                |         |
| cg05687686 | 2  | 180,726,697 | 9.12E-08 | 0.403 | 0.284 |          |       |     | <i>MIR1258</i> | TSS1500 |
| cg26803268 | 10 | 18,549,536  | 8.4E-10  | 0.403 | 0.433 |          |       |     | <i>CACNB2</i>  | Body    |
| cg14639847 | 12 | 54,389,982  | 0.001172 | 0.403 | 0.312 |          |       |     |                |         |
| cg12457529 | 7  | 99,155,892  | 0.000536 | 0.403 | 0.283 |          |       |     | <i>ZNF655</i>  | TSS200  |
| cg07251099 | 3  | 112,052,405 | 5.63E-05 | 0.403 | 0.500 |          |       |     | <i>CD200</i>   | Body    |
| cg03678039 | 17 | 74,525,066  | 1.01E-17 | 0.403 | 0.390 |          |       | Yes | <i>CYGB</i>    | Body    |
| cg07285673 | 2  | 29,337,984  | 2.39E-07 | 0.403 | 0.284 |          |       |     | <i>CLIP4</i>   | TSS1500 |
| cg10096645 | 18 | 24,130,851  | 1.08E-26 | 0.403 | 0.377 |          |       |     | <i>KCTD1</i>   | 5'UTR   |
| cg03118626 | 19 | 51,523,252  | 4.59E-19 | 0.403 | 0.397 |          |       |     | <i>KLK10</i>   | 5'UTR   |
| cg04012931 | 6  | 30,711,164  | 1.94E-19 | 0.403 | 0.403 |          |       |     | <i>IER3</i>    | 3'UTR   |
| cg13102585 | 17 | 42,386,208  | 1.92E-32 | 0.403 | 0.379 | 1.59E-29 | 0.256 |     | <i>RUNDC3A</i> | 1stExon |
| cg25593560 | 19 | 16,187,364  | 0.000631 | 0.402 | 0.390 |          |       |     | <i>TPM4</i>    | Body    |
| cg19263700 | 6  | 32,223,236  | 2.72E-13 | 0.402 | 0.377 |          |       |     |                |         |
| cg27449131 | 6  | 30,712,027  | 0.003601 | 0.402 | 0.413 |          |       |     | <i>IER3</i>    | Body    |
| cg05286653 | 19 | 46,800,602  | 7.15E-21 | 0.402 | 0.384 |          |       |     | <i>HIF3A</i>   | Body    |
| cg14038391 | 10 | 102,900,130 | 9.94E-07 | 0.402 | 0.347 |          |       |     |                |         |
| cg08857063 | 6  | 50,808,667  | 4.59E-15 | 0.402 | 0.410 |          |       |     | <i>TFAP2B</i>  | Body    |
| cg23398076 | 2  | 66,664,960  | 0.001111 | 0.402 | 0.467 |          |       |     | <i>MEIS1</i>   | Body    |

|            |    |             |          |       |       |          |       |  |                |         |
|------------|----|-------------|----------|-------|-------|----------|-------|--|----------------|---------|
| cg26733301 | 20 | 61,585,924  | 2.51E-18 | 0.402 | 0.380 |          |       |  | <i>SLC17A9</i> | Body    |
| cg04600466 | 5  | 139,076,830 | 4.58E-36 | 0.402 | 0.389 |          |       |  |                |         |
| cg07846311 | 4  | 57,371,927  | 4.54E-07 | 0.402 | 0.415 |          |       |  | <i>ARL9</i>    | 5'UTR   |
| cg01116067 | 1  | 2,461,838   | 4.41E-10 | 0.402 | 0.371 |          |       |  | <i>HES5</i>    | TSS200  |
| cg16680677 | 10 | 80,008,481  | 8.1E-11  | 0.402 | 0.341 |          |       |  |                |         |
| cg17911788 | 17 | 44,343,683  | 3.33E-09 | 0.402 | 0.338 |          |       |  |                |         |
| cg27447477 | 12 | 111,023,252 | 6.77E-18 | 0.402 | 0.387 |          |       |  |                |         |
| cg08421126 | 2  | 43,019,854  | 2.02E-07 | 0.402 | 0.246 |          |       |  | <i>HAAO</i>    | TSS200  |
| cg08693490 | 12 | 116,757,896 | 2.77E-15 | 0.402 | 0.398 |          |       |  |                |         |
| cg21386647 | 3  | 9,289,893   | 3.26E-07 | 0.402 | 0.269 |          |       |  | <i>SRGAP3</i>  | Body    |
| cg16133088 | 12 | 3,862,428   | 0.019573 | 0.402 | 0.275 |          |       |  | <i>EFCAB4B</i> | TSS200  |
| cg00890485 | 14 | 70,653,919  | 9.71E-11 | 0.402 | 0.380 |          |       |  | <i>SLC8A3</i>  | 5'UTR   |
| cg09704415 | 1  | 48,937,250  | 4E-24    | 0.402 | 0.345 | 8.46E-33 | 0.274 |  | <i>SPATA6</i>  | Body    |
| cg06463958 | 6  | 166,582,393 | 0.02384  | 0.402 | 0.250 |          |       |  | <i>T</i>       | TSS1500 |
| cg23244790 | 5  | 140,811,102 | 3.46E-17 | 0.402 | 0.369 |          |       |  | <i>PCDHGA4</i> | Body    |
| cg25542878 | 4  | 6,474,782   | 1.14E-05 | 0.402 | 0.302 |          |       |  | <i>PPP2R2C</i> | TSS1500 |
| cg26332488 | 1  | 2,230,640   | 1.91E-25 | 0.402 | 0.396 |          |       |  | <i>SKI</i>     | Body    |
| cg26121931 | 6  | 29,895,204  | 1.45E-09 | 0.402 | 0.387 |          |       |  |                |         |
| cg00084338 | 6  | 170,595,920 | 3.48E-11 | 0.402 | 0.389 |          |       |  | <i>DLL1</i>    | Body    |
| cg20786074 | 2  | 56,150,255  | 1.16E-26 | 0.402 | 0.393 | 1.2E-27  | 0.282 |  | <i>EFEMP1</i>  | 1stExon |
| cg19166302 | 3  | 122,296,613 | 6.65E-10 | 0.401 | 0.397 |          |       |  | <i>PARP15</i>  | 1stExon |
| cg10400707 | 1  | 160,369,840 | 7.21E-12 | 0.401 | 0.360 |          |       |  | <i>VANGL2</i>  | TSS1500 |
| cg24530250 | 11 | 71,955,599  | 1.14E-05 | 0.401 | 0.373 |          |       |  | <i>PHOX2A</i>  | TSS1500 |
| cg17469978 | 7  | 116,164,704 | 3.26E-06 | 0.401 | 0.321 | 9.54E-26 | 0.236 |  | <i>CAV1</i>    | TSS200  |
| cg19736608 | 4  | 47,840,050  | 3.4E-06  | 0.401 | 0.357 |          |       |  | <i>CORIN</i>   | 5'UTR   |
| cg03336086 | 5  | 79,331,047  | 1.27E-11 | 0.401 | 0.341 |          |       |  | <i>THBS4</i>   | 1stExon |
| cg07664553 | 4  | 57,372,597  | 1.21E-22 | 0.401 | 0.409 |          |       |  | <i>ARL9</i>    | 5'UTR   |
| cg01446950 | 2  | 222,435,351 | 0.00027  | 0.401 | 0.286 |          |       |  | <i>EPHA4</i>   | Body    |
| cg04987053 | 16 | 5,038,078   | 0.000202 | 0.401 | 0.470 |          |       |  | <i>SEC14L5</i> | Body    |
| cg11027354 | 5  | 10,761,677  | 0.015703 | 0.401 | 0.210 |          |       |  | <i>DAP</i>     | TSS1500 |
| cg13928417 | 9  | 124,498,782 | 4.11E-32 | 0.401 | 0.383 |          |       |  | <i>DAB2IP</i>  | Body    |
| cg17265994 | 11 | 2,905,024   | 3.97E-12 | 0.401 | 0.328 |          |       |  | <i>CDKN1C</i>  | 3'UTR   |
| cg13248778 | 7  | 128,337,725 | 0.00544  | 0.401 | 0.345 |          |       |  |                |         |
| cg20687242 | 12 | 54,653,427  | 4.61E-10 | 0.401 | 0.376 |          |       |  | <i>CBX5</i>    | TSS200  |

|            |    |             |          |       |       |          |       |  |                |         |
|------------|----|-------------|----------|-------|-------|----------|-------|--|----------------|---------|
| cg20365336 | 6  | 16,986,186  | 3.27E-15 | 0.401 | 0.361 |          |       |  |                |         |
| cg14173147 | 9  | 27,528,300  | 1.37E-22 | 0.401 | 0.381 |          |       |  | <i>MOBKL2B</i> | 5'UTR   |
| cg07398614 | 3  | 128,564,918 | 0.000356 | 0.401 | 0.358 |          |       |  |                |         |
| cg12548341 | 10 | 104,420,963 | 3.08E-22 | 0.401 | 0.390 |          |       |  |                |         |
| cg27498387 | 8  | 41,655,789  | 2.51E-31 | 0.401 | 0.383 |          |       |  | <i>ANK1</i>    | TSS1500 |
| cg00420348 | 11 | 830,190     | 7.04E-08 | 0.401 | 0.423 |          |       |  | <i>EFCAB4A</i> | Body    |
| cg01016662 | 1  | 110,673,082 | 0.00131  | 0.401 | 0.339 |          |       |  |                |         |
| cg24251193 | 1  | 156,676,542 | 4.84E-07 | 0.400 | 0.377 |          |       |  | <i>CRABP2</i>  | TSS1500 |
| cg22844232 | 3  | 193,776,047 | 7.46E-13 | 0.400 | 0.374 |          |       |  |                |         |
| cg03405260 | 17 | 77,786,344  | 1.61E-16 | 0.400 | 0.393 |          |       |  |                |         |
| cg25228995 | 5  | 139,260,468 | 1.43E-25 | 0.400 | 0.352 |          |       |  | <i>NRG2</i>    | Body    |
| cg03789645 | 7  | 148,394,842 | 5.24E-16 | 0.400 | 0.367 |          |       |  | <i>CUL1</i>    | TSS1500 |
| cg27486427 | 3  | 25,469,919  | 3.02E-32 | 0.400 | 0.390 | 1.81E-26 | 0.258 |  | <i>RARB</i>    | 5'UTR   |
| cg19266578 | 20 | 62,711,729  | 5.02E-13 | 0.400 | 0.410 |          |       |  | <i>RGS19</i>   | TSS1500 |
| cg23477967 | 2  | 188,419,087 | 5.47E-07 | 0.400 | 0.438 | 1.38E-14 | 0.234 |  | <i>TFPI</i>    | 1stExon |
| cg16498913 | 5  | 1,851,563   | 3.71E-13 | 0.400 | 0.401 |          |       |  |                |         |
| cg23369529 | 1  | 68,149,989  | 2.05E-17 | 0.400 | 0.334 |          |       |  | <i>GADD45A</i> | TSS1500 |
| cg05972871 | 12 | 3,862,444   | 0.018095 | 0.400 | 0.275 |          |       |  | <i>EFCAB4B</i> | TSS200  |
| cg06786153 | 15 | 78,327,011  | 1.62E-08 | 0.400 | 0.350 |          |       |  | <i>TBC1D2B</i> | Body    |
| cg20577019 | 1  | 150,123,077 | 0.001663 | 0.400 | 0.255 |          |       |  | <i>PLEKHO1</i> | Body    |
| cg23155911 | 5  | 126,205,009 | 3E-36    | 0.400 | 0.387 |          |       |  | <i>MARCH3</i>  | 3'UTR   |
| cg12574408 | 7  | 25,219,543  | 1.17E-05 | 0.400 | 0.303 |          |       |  | <i>C7orf31</i> | 5'UTR   |
| cg26310256 | X  | 13,588,301  | 5.29E-18 | 0.400 | 0.421 |          |       |  | <i>EGFL6</i>   | Body    |
| cg10708955 | 17 | 8,056,950   | 1.27E-27 | 0.399 | 0.388 |          |       |  | <i>PER1</i>    | TSS1500 |
| cg00751021 | 2  | 206,474,068 | 2.18E-22 | 0.399 | 0.400 |          |       |  | <i>PARD3B</i>  | Body    |
| cg21527621 | 1  | 55,013,419  | 1.99E-11 | 0.399 | 0.386 |          |       |  | <i>ACOT11</i>  | TSS1500 |
| cg09651145 | 5  | 148,651,144 | 3.03E-09 | 0.399 | 0.346 |          |       |  | <i>AFAP1L1</i> | TSS1500 |
| cg14081667 | 21 | 44,782,497  | 3.68E-40 | 0.399 | 0.397 |          |       |  |                |         |
| cg21602557 | 8  | 119,122,878 | 0.000101 | 0.399 | 0.297 |          |       |  | <i>EXT1</i>    | 1stExon |
| cg05422029 | 6  | 27,235,843  | 2.23E-05 | 0.399 | 0.483 |          |       |  |                |         |
| cg07311845 | X  | 154,842,736 | 4.13E-09 | 0.399 | 0.319 | 5.72E-19 | 0.240 |  | <i>TMLHE</i>   | TSS200  |
| cg21203569 | 11 | 47,279,365  | 8.46E-16 | 0.399 | 0.378 |          |       |  | <i>NR1H3</i>   | TSS200  |
| cg05885936 | 2  | 132,088,912 | 2.1E-09  | 0.399 | 0.437 |          |       |  |                |         |
| cg03172947 | 20 | 44,035,850  | 1.92E-14 | 0.399 | 0.374 |          |       |  | <i>DBNDD2</i>  | 5'UTR   |

|            |    |             |          |       |       |          |       |  |                   |         |
|------------|----|-------------|----------|-------|-------|----------|-------|--|-------------------|---------|
| cg05102394 | 4  | 148,402,899 | 9.68E-20 | 0.399 | 0.358 |          |       |  | <i>EDNRA</i>      | Body    |
| cg06563300 | 12 | 100,750,811 | 1.06E-07 | 0.399 | 0.403 | 3.09E-17 | 0.291 |  | <i>SLC17A8</i>    | TSS200  |
| cg10938374 | 6  | 30,712,058  | 0.00601  | 0.399 | 0.423 |          |       |  | <i>IER3</i>       | Body    |
| cg06154084 | 10 | 102,792,249 | 2.26E-05 | 0.398 | 0.427 |          |       |  | <i>PDZD7</i>      | TSS1500 |
| cg16570157 | 11 | 829,783     | 0.014512 | 0.398 | 0.427 |          |       |  | <i>EFCAB4A</i>    | Body    |
| cg02667022 | 5  | 147,162,223 | 1.21E-09 | 0.398 | 0.361 |          |       |  | <i>JAKMIP2</i>    | 5'UTR   |
| cg03481274 | 3  | 25,469,708  | 5.27E-35 | 0.398 | 0.380 |          |       |  | <i>RARB</i>       | TSS200  |
| cg13417862 | 17 | 855,238     | 1.46E-41 | 0.398 | 0.385 |          |       |  | <i>NXN</i>        | Body    |
| cg16964025 | 7  | 157,482,215 | 1.71E-27 | 0.398 | 0.409 |          |       |  | <i>PTPRN2</i>     | Body    |
| cg12098872 | 19 | 47,742,726  | 1.55E-08 | 0.398 | 0.370 |          |       |  |                   |         |
| cg05573767 | 6  | 167,171,394 | 6.15E-07 | 0.398 | 0.393 |          |       |  | <i>RPS6KA2</i>    | Body    |
| cg18296036 | 7  | 150,653,115 | 8.73E-24 | 0.398 | 0.378 |          |       |  | <i>KCNH2</i>      | Body    |
| cg06747432 | 19 | 46,916,741  | 1.91E-05 | 0.398 | 0.477 |          |       |  | <i>CCDC8</i>      | 1stExon |
| cg05852143 | 12 | 5,540,116   | 2.07E-07 | 0.398 | 0.453 |          |       |  | <i>NTF3</i>       | TSS1500 |
| cg14907769 | 8  | 49,468,941  | 2.15E-19 | 0.398 | 0.391 |          |       |  |                   |         |
| cg03810476 | X  | 17,392,798  | 9.68E-29 | 0.398 | 0.358 |          |       |  | <i>NHS</i>        | TSS1500 |
| cg04299389 | 20 | 25,129,296  | 4.1E-14  | 0.398 | 0.347 |          |       |  | <i>LOC284798</i>  | Body    |
| cg25006194 | 12 | 94,288,553  | 3.65E-19 | 0.398 | 0.388 |          |       |  |                   |         |
| cg03711016 | 16 | 12,997,684  | 2.4E-09  | 0.398 | 0.399 |          |       |  | <i>SHISA9</i>     | Body    |
| cg05781504 | 5  | 145,713,607 | 1.15E-07 | 0.398 | 0.353 |          |       |  |                   |         |
| cg06105694 | 17 | 36,585,340  | 1.9E-36  | 0.398 | 0.384 |          |       |  |                   |         |
| cg19788741 | 5  | 101,632,310 | 3.06E-10 | 0.397 | 0.379 |          |       |  | <i>SLCO4C1</i>    | TSS200  |
| cg21674704 | 8  | 131,455,249 | 4.02E-06 | 0.397 | 0.221 |          |       |  |                   |         |
| cg03340119 | 1  | 246,952,508 | 2.01E-53 | 0.397 | 0.361 |          |       |  | <i>LOC149134</i>  | TSS1500 |
| cg17160382 | 6  | 121,758,980 | 0.002313 | 0.397 | 0.444 |          |       |  | <i>GJA1</i>       | 5'UTR   |
| cg23079252 | 6  | 30,095,199  | 1.25E-27 | 0.397 | 0.396 |          |       |  |                   |         |
| cg16079958 | 5  | 71,404,742  | 5.35E-10 | 0.397 | 0.336 |          |       |  | <i>MAP1B</i>      | Body    |
| cg17568996 | 22 | 42,828,125  | 5.55E-27 | 0.397 | 0.357 | 1.16E-28 | 0.296 |  | <i>NFAM1</i>      | Body    |
| cg07429623 | 1  | 205,326,201 | 1.14E-26 | 0.397 | 0.396 |          |       |  | <i>KLHDC8A</i>    | TSS200  |
| cg15846886 | 17 | 79,790,116  | 1.24E-30 | 0.397 | 0.385 |          |       |  | <i>FAM195B</i>    | 5'UTR   |
| cg15726260 | 6  | 29,974,900  | 2.05E-10 | 0.397 | 0.391 |          |       |  | <i>HLA-J</i>      | Body    |
| cg02783887 | 2  | 660,856     | 5.76E-20 | 0.397 | 0.390 |          |       |  |                   |         |
| cg08253296 | 5  | 74,907,592  | 5.64E-19 | 0.397 | 0.343 |          |       |  |                   |         |
| cg25272065 | 1  | 77,334,678  | 9.56E-09 | 0.397 | 0.341 |          |       |  | <i>ST6GALNAC5</i> | Body    |

|            |    |             |          |       |       |  |  |  |                 |         |
|------------|----|-------------|----------|-------|-------|--|--|--|-----------------|---------|
| cg06244497 | 19 | 39,466,575  | 1.5E-08  | 0.397 | 0.432 |  |  |  | <i>FBXO17</i>   | TSS200  |
| cg22674613 | 6  | 44,310,331  | 4.11E-07 | 0.397 | 0.417 |  |  |  | <i>SPATS1</i>   | TSS200  |
| cg13114305 | X  | 100,446,736 | 6.54E-10 | 0.397 | 0.401 |  |  |  |                 |         |
| cg03257575 | 1  | 46,951,318  | 0.001676 | 0.397 | 0.344 |  |  |  |                 |         |
| cg25896644 | 11 | 116,371,487 | 0.005215 | 0.397 | 0.375 |  |  |  |                 |         |
| cg27663938 | 12 | 103,696,381 | 7.39E-08 | 0.397 | 0.327 |  |  |  | <i>C12orf42</i> | Body    |
| cg22935450 | 17 | 38,465,393  | 1.33E-32 | 0.396 | 0.381 |  |  |  | <i>RARA</i>     | TSS200  |
| cg15866977 | 17 | 79,919,578  | 0.005869 | 0.396 | 0.420 |  |  |  | <i>NOTUM</i>    | TSS1500 |
| cg05165378 | 7  | 99,155,739  | 6.98E-05 | 0.396 | 0.281 |  |  |  | <i>ZNF655</i>   | TSS1500 |
| cg03336334 | 15 | 29,407,987  | 5.75E-08 | 0.396 | 0.362 |  |  |  | <i>APBA2</i>    | Body    |
| cg23689428 | 2  | 121,223,964 | 1.88E-07 | 0.396 | 0.306 |  |  |  | <i>LOC84931</i> | TSS200  |
| cg23938220 | 5  | 112,073,538 | 0.001635 | 0.396 | 0.232 |  |  |  | <i>APC</i>      | TSS200  |
| cg16909408 | 3  | 134,125,688 | 0.000181 | 0.396 | 0.374 |  |  |  |                 |         |
| cg08818610 | 6  | 24,910,720  | 2.41E-07 | 0.396 | 0.439 |  |  |  | <i>FAM65B</i>   | 5'UTR   |
| cg13601435 | 9  | 120,507,431 | 1E-09    | 0.396 | 0.370 |  |  |  |                 |         |
| cg17949969 | 4  | 8,073,790   | 0.003359 | 0.396 | 0.379 |  |  |  | <i>ABLIM2</i>   | Body    |
| cg14736058 | 4  | 16,085,606  | 2.12E-66 | 0.396 | 0.386 |  |  |  | <i>PROM1</i>    | TSS200  |
| cg20834178 | 4  | 6,944,071   | 2.87E-10 | 0.396 | 0.410 |  |  |  | <i>TBC1D14</i>  | Body    |
| cg13319975 | 6  | 146,136,371 | 0.000146 | 0.396 | 0.276 |  |  |  | <i>FBXO30</i>   | TSS1500 |
| cg26530485 | 1  | 23,496,304  | 3.33E-22 | 0.396 | 0.399 |  |  |  | <i>LUZP1</i>    | TSS1500 |
| cg07182669 | 6  | 2,903,535   | 3.77E-18 | 0.396 | 0.352 |  |  |  | <i>SERPINB9</i> | 1stExon |
| cg08384314 | 6  | 30,711,680  | 2.18E-20 | 0.396 | 0.398 |  |  |  | <i>IER3</i>     | 3'UTR   |
| cg07067982 | 11 | 57,194,370  | 1.23E-09 | 0.396 | 0.392 |  |  |  | <i>SLC43A3</i>  | 5'UTR   |
| cg17696194 | 11 | 58,941,051  | 1.04E-25 | 0.396 | 0.384 |  |  |  | <i>DTX4</i>     | Body    |
| cg18846883 | 12 | 3,451,308   | 3.34E-23 | 0.396 | 0.389 |  |  |  |                 |         |
| cg26764250 | 8  | 104,090,700 | 3.16E-07 | 0.396 | 0.448 |  |  |  |                 |         |
| cg21723903 | 12 | 3,862,575   | 7.52E-05 | 0.395 | 0.357 |  |  |  | <i>EFCAB4B</i>  | TSS1500 |
| cg11452354 | 6  | 44,187,052  | 0.003913 | 0.395 | 0.280 |  |  |  | <i>SLC29A1</i>  | TSS200  |
| cg06631944 | 7  | 158,365,160 | 6.05E-26 | 0.395 | 0.394 |  |  |  | <i>PTPRN2</i>   | Body    |
| cg24441440 | 10 | 120,429,062 | 1.25E-07 | 0.395 | 0.298 |  |  |  |                 |         |
| cg11712835 | 1  | 201,509,152 | 6.09E-11 | 0.395 | 0.334 |  |  |  |                 |         |
| cg00687252 | 6  | 30,712,060  | 1E-05    | 0.395 | 0.397 |  |  |  | <i>IER3</i>     | Body    |
| cg20248458 | 2  | 21,022,587  | 0.000356 | 0.395 | 0.321 |  |  |  | <i>C2orf43</i>  | 5'UTR   |
| cg17379325 | 17 | 7,555,411   | 3.49E-26 | 0.395 | 0.384 |  |  |  | <i>ATP1B2</i>   | Body    |

|            |    |             |          |       |       |          |       |  |                   |         |
|------------|----|-------------|----------|-------|-------|----------|-------|--|-------------------|---------|
| cg22831607 | 10 | 99,531,797  | 0.030052 | 0.395 | 0.264 |          |       |  | <i>SFRP5</i>      | TSS200  |
| cg15553598 | 5  | 175,792,973 | 0.001361 | 0.395 | 0.483 |          |       |  | <i>ARL10</i>      | Body    |
| cg09024126 | 4  | 16,085,603  | 2.34E-53 | 0.395 | 0.393 |          |       |  | <i>PROM1</i>      | TSS200  |
| cg25456068 | 17 | 77,800,718  | 1.86E-16 | 0.395 | 0.421 |          |       |  |                   |         |
| cg16703956 | 5  | 1,446,217   | 3.91E-24 | 0.395 | 0.379 |          |       |  | <i>SLC6A3</i>     | TSS1500 |
| cg19167683 | 11 | 57,194,495  | 6.98E-05 | 0.395 | 0.356 |          |       |  | <i>SLC43A3</i>    | 5'UTR   |
| cg20115266 | 19 | 51,416,517  | 3.72E-14 | 0.395 | 0.403 |          |       |  |                   |         |
| cg07475973 | 22 | 42,306,951  | 4.18E-06 | 0.395 | 0.337 |          |       |  |                   |         |
| cg02970836 | 16 | 3,237,991   | 7.63E-05 | 0.395 | 0.411 |          |       |  |                   |         |
| cg23502772 | 5  | 43,191,975  | 1.44E-12 | 0.395 | 0.296 | 7.48E-35 | 0.242 |  | <i>MGC42105</i>   | TSS1500 |
| cg14281592 | 9  | 129,884,313 | 2.79E-29 | 0.395 | 0.385 |          |       |  | <i>ANGPTL2</i>    | 5'UTR   |
| cg01913970 | 1  | 45,308,593  | 0.000185 | 0.395 | 0.319 |          |       |  | <i>PTCH2</i>      | 1stExon |
| cg16663419 | 8  | 145,033,566 | 1.28E-10 | 0.395 | 0.355 |          |       |  | <i>PLEC1</i>      | Body    |
| cg23555120 | 12 | 106,533,863 | 2.94E-31 | 0.395 | 0.386 | 8.4E-31  | 0.276 |  | <i>NUAK1</i>      | TSS200  |
| cg25721451 | 2  | 66,662,764  | 0.000402 | 0.395 | 0.440 |          |       |  | <i>MEIS1</i>      | 5'UTR   |
| cg17689799 | 2  | 27,529,540  | 2.4E-31  | 0.395 | 0.364 |          |       |  | <i>TRIM54</i>     | 3'UTR   |
| cg22846914 | X  | 25,041,258  | 0.003521 | 0.395 | 0.365 |          |       |  |                   |         |
| cg01582438 | 20 | 62,461,159  | 2.8E-16  | 0.395 | 0.425 |          |       |  |                   |         |
| cg15232539 | 8  | 19,459,672  | 1.02E-06 | 0.395 | 0.290 |          |       |  | <i>CSGALNACT1</i> | 1stExon |
| cg13000082 | 2  | 201,450,527 | 0.000781 | 0.395 | 0.351 |          |       |  | <i>AOX1</i>       | TSS1500 |
| cg05312305 | 7  | 99,156,387  | 0.018961 | 0.395 | 0.327 |          |       |  | <i>ZNF655</i>     | 1stExon |
| cg03668718 | 17 | 33,701,350  | 8.06E-08 | 0.395 | 0.435 |          |       |  | <i>SLFN11</i>     | TSS1500 |
| cg17052266 | 7  | 29,186,183  | 0.000695 | 0.395 | 0.354 |          |       |  | <i>CPVL</i>       | TSS200  |
| cg03397307 | 12 | 3,862,423   | 0.016869 | 0.394 | 0.272 |          |       |  | <i>EFCAB4B</i>    | TSS200  |
| cg12725760 | 1  | 192,873,912 | 7.16E-29 | 0.394 | 0.400 |          |       |  |                   |         |
| cg21654383 | 2  | 85,641,076  | 0.002187 | 0.394 | 0.410 |          |       |  |                   |         |
| cg11624479 | 11 | 9,285,586   | 7.15E-11 | 0.394 | 0.321 |          |       |  | <i>DENND5A</i>    | Body    |
| cg12630147 | 10 | 70,321,574  | 3.76E-14 | 0.394 | 0.367 |          |       |  | <i>TET1</i>       | 5'UTR   |
| cg15338327 | 10 | 101,280,209 | 1.29E-14 | 0.394 | 0.406 |          |       |  |                   |         |
| cg02724472 | 7  | 102,553,293 | 2.21E-25 | 0.394 | 0.366 | 9.23E-14 | 0.233 |  | <i>LRRC17</i>     | TSS200  |
| cg15958289 | 11 | 126,188,994 | 6.08E-33 | 0.394 | 0.381 |          |       |  | <i>DCPS</i>       | Body    |
| cg16001422 | 8  | 145,022,842 | 4.99E-18 | 0.394 | 0.344 |          |       |  | <i>PLEC1</i>      | Body    |
| cg24938632 | 17 | 46,830,125  | 1E-123   | 0.394 | 0.385 |          |       |  |                   |         |
| cg17485454 | 4  | 87,281,281  | 2.6E-07  | 0.394 | 0.384 |          |       |  | <i>MAPK10</i>     | 5'UTR   |

|            |    |             |          |       |       |          |       |  |                     |         |
|------------|----|-------------|----------|-------|-------|----------|-------|--|---------------------|---------|
| cg20787173 | 6  | 133,562,475 | 1.22E-09 | 0.394 | 0.444 |          |       |  | <i>EYA4</i>         | TSS200  |
| cg03310939 | 7  | 101,688,730 | 1.84E-25 | 0.394 | 0.369 |          |       |  | <i>CUX1</i>         | Body    |
| cg14686113 | 4  | 54,965,829  | 2.32E-09 | 0.394 | 0.435 |          |       |  | <i>GSX2</i>         | TSS1500 |
| cg01985390 | 2  | 27,529,981  | 1.13E-17 | 0.394 | 0.366 |          |       |  | <i>TRIM54</i>       | 3'UTR   |
| cg19769982 | 21 | 26,934,197  | 0.000571 | 0.394 | 0.327 |          |       |  | <i>MIR155HG</i>     | TSS1500 |
| cg26730416 | 11 | 4,233,502   | 9.78E-08 | 0.394 | 0.406 |          |       |  |                     |         |
| cg01832036 | 17 | 48,050,274  | 2.17E-23 | 0.394 | 0.397 |          |       |  | <i>DLX4</i>         | Body    |
| cg24643706 | 6  | 28,603,779  | 0.00014  | 0.394 | 0.366 |          |       |  |                     |         |
| cg10874556 | X  | 100,446,569 | 1.06E-22 | 0.394 | 0.386 |          |       |  |                     |         |
| cg25124406 | 12 | 89,744,662  | 6.39E-10 | 0.394 | 0.338 |          |       |  | <i>DUSP6</i>        | Body    |
| cg00759699 | 19 | 12,991,918  | 0.00091  | 0.393 | 0.193 |          |       |  | <i>DNASE2</i>       | Body    |
| cg08325845 | 6  | 29,974,886  | 1.62E-11 | 0.393 | 0.402 |          |       |  | <i>HLA-J</i>        | Body    |
| cg09723979 | 11 | 19,736,248  | 1.32E-09 | 0.393 | 0.388 |          |       |  | <i>LOC100126784</i> | TSS200  |
| cg26701408 | 10 | 102,906,057 | 9.94E-14 | 0.393 | 0.418 |          |       |  |                     |         |
| cg14370314 | 14 | 23,834,891  | 0.000295 | 0.393 | 0.390 |          |       |  | <i>EFS</i>          | TSS200  |
| cg25707722 | 12 | 63,025,490  | 9.92E-09 | 0.393 | 0.310 |          |       |  |                     |         |
| cg01561916 | 2  | 43,020,169  | 1.82E-12 | 0.393 | 0.280 | 5.76E-19 | 0.315 |  | <i>HAAO</i>         | TSS1500 |
| cg17101165 | 12 | 115,136,226 | 2.5E-11  | 0.393 | 0.383 |          |       |  |                     |         |
| cg07455757 | 16 | 54,968,985  | 0.000536 | 0.393 | 0.461 |          |       |  |                     |         |
| cg01271455 | 7  | 157,362,062 | 1.24E-17 | 0.393 | 0.397 |          |       |  | <i>PTPRN2</i>       | Body    |
| cg03750144 | 2  | 131,595,152 | 1.53E-19 | 0.393 | 0.336 |          |       |  |                     |         |
| cg09629657 | 5  | 179,220,795 | 3.52E-26 | 0.393 | 0.395 |          |       |  | <i>LTC4S</i>        | TSS200  |
| cg25223095 | 3  | 16,927,003  | 1.17E-07 | 0.393 | 0.259 |          |       |  | <i>PLCL2</i>        | Body    |
| cg08305551 | 19 | 12,978,611  | 0.000381 | 0.393 | 0.374 |          |       |  | <i>MAST1</i>        | Body    |
| cg23230584 | 7  | 95,025,740  | 4.35E-12 | 0.393 | 0.330 |          |       |  | <i>PON3</i>         | TSS200  |
| cg26718878 | 7  | 96,647,882  | 3.7E-09  | 0.393 | 0.385 |          |       |  |                     |         |
| cg03826594 | 12 | 54,812,085  | 8.09E-08 | 0.393 | 0.402 |          |       |  | <i>ITGA5</i>        | Body    |
| cg04324758 | 19 | 16,436,671  | 7.1E-68  | 0.393 | 0.389 |          |       |  | <i>KLF2</i>         | Body    |
| cg08857201 | 15 | 56,536,865  | 1.28E-07 | 0.393 | 0.255 |          |       |  | <i>RFX7</i>         | TSS1500 |
| cg20286956 | 1  | 39,547,918  | 1.05E-15 | 0.393 | 0.386 |          |       |  | <i>MACF1</i>        | 5'UTR   |
| cg18882819 | 13 | 43,566,496  | 8.22E-05 | 0.393 | 0.374 |          |       |  | <i>EPSTI1</i>       | TSS200  |
| cg06197769 | 12 | 12,868,983  | 2.4E-09  | 0.392 | 0.371 |          |       |  | <i>CDKN1B</i>       | TSS1500 |
| cg12691004 | 2  | 88,352,949  | 7.61E-14 | 0.392 | 0.421 |          |       |  | <i>KRCC1</i>        | 5'UTR   |
| cg24846199 | 7  | 1,283,915   | 3.28E-08 | 0.392 | 0.350 |          |       |  |                     |         |

|            |    |             |          |       |       |          |       |  |                     |         |
|------------|----|-------------|----------|-------|-------|----------|-------|--|---------------------|---------|
| cg26348018 | X  | 129,087,487 | 4.93E-12 | 0.392 | 0.380 |          |       |  |                     |         |
| cg04207084 | 7  | 157,477,846 | 2.7E-57  | 0.392 | 0.378 |          |       |  | <i>PTPRN2</i>       | Body    |
| cg22562494 | 17 | 41,607,896  | 3.53E-33 | 0.392 | 0.373 |          |       |  | <i>ETV4</i>         | Body    |
| cg00455424 | 1  | 65,468,815  | 0.002732 | 0.392 | 0.252 |          |       |  |                     |         |
| cg03146625 | 12 | 54,448,729  | 2.89E-14 | 0.392 | 0.377 |          |       |  | <i>HOXC4</i>        | Body    |
| cg15846316 | 4  | 57,371,719  | 4.26E-07 | 0.392 | 0.413 |          |       |  | <i>ARL9</i>         | 5'UTR   |
| cg16600991 | 12 | 54,389,477  | 0.021003 | 0.392 | 0.327 |          |       |  |                     |         |
| cg18161327 | 13 | 100,627,703 | 3.1E-06  | 0.392 | 0.426 |          |       |  |                     |         |
| cg24604013 | 13 | 112,721,325 | 1.37E-15 | 0.392 | 0.381 |          |       |  | <i>SOX1</i>         | TSS1500 |
| cg02058870 | 14 | 72,053,146  | 3.57E-16 | 0.392 | 0.382 |          |       |  | <i>SIPA1L1</i>      | 5'UTR   |
| cg27292588 | 1  | 45,285,892  | 5.97E-06 | 0.392 | 0.399 |          |       |  | <i>PTCH2</i>        | 3'UTR   |
| cg00840403 | 16 | 71,560,205  | 1.4E-11  | 0.392 | 0.386 | 3.12E-21 | 0.208 |  | <i>CHST4</i>        | 1stExon |
| cg07657192 | 6  | 29,894,986  | 1.49E-05 | 0.392 | 0.351 |          |       |  |                     |         |
| cg20303028 | 2  | 74,607,507  | 7.1E-12  | 0.392 | 0.401 |          |       |  | <i>DCTN1</i>        | TSS200  |
| cg03930313 | 17 | 36,621,405  | 1.8E-16  | 0.392 | 0.395 |          |       |  | <i>ARHGAP23</i>     | Body    |
| cg09636214 | 14 | 73,712,491  | 5.89E-10 | 0.392 | 0.393 |          |       |  | <i>PAPLN</i>        | Body    |
| cg13648318 | 9  | 124,991,408 | 5.34E-05 | 0.392 | 0.274 |          |       |  | <i>LHX6</i>         | TSS1500 |
| cg14672994 | 17 | 48,503,057  | 6.27E-34 | 0.392 | 0.368 | 3.99E-33 | 0.294 |  | <i>ACSF2</i>        | TSS1500 |
| cg22830113 | 2  | 127,783,168 | 0.003385 | 0.392 | 0.260 |          |       |  |                     |         |
| cg02227919 | 2  | 171,569,132 | 5.78E-08 | 0.392 | 0.360 |          |       |  | <i>LOC440925</i>    | Body    |
| cg19595750 | 12 | 133,065,939 | 0.000896 | 0.392 | 0.325 |          |       |  | <i>FBRSL1</i>       | TSS1500 |
| cg18959554 | 6  | 44,310,345  | 2.9E-15  | 0.392 | 0.409 |          |       |  | <i>SPATS1</i>       | TSS200  |
| cg01946042 | 1  | 21,754,570  | 3.33E-09 | 0.392 | 0.327 |          |       |  |                     |         |
| cg00557360 | 20 | 37,230,386  | 7.07E-45 | 0.392 | 0.396 |          |       |  | <i>C20orf95</i>     | TSS200  |
| cg12109838 | 4  | 103,996,978 | 4.66E-08 | 0.392 | 0.341 |          |       |  | <i>NHEDC2</i>       | 5'UTR   |
| cg22817993 | 1  | 1,950,415   | 5.92E-14 | 0.391 | 0.353 |          |       |  | <i>GABRD</i>        | TSS1500 |
| cg06560887 | 11 | 33,890,371  | 0.000133 | 0.391 | 0.373 |          |       |  | <i>LMO2</i>         | Body    |
| cg00462570 | 9  | 98,784,441  | 1.23E-19 | 0.391 | 0.334 |          |       |  | <i>NCRNA00092</i>   | TSS1500 |
| cg20399509 | 21 | 47,717,575  | 1.58E-12 | 0.391 | 0.380 |          |       |  | <i>C21orf57</i>     | 3'UTR   |
| cg24565274 | 11 | 19,736,253  | 3.76E-07 | 0.391 | 0.392 |          |       |  | <i>LOC100126784</i> | TSS200  |
| cg08663159 | 4  | 101,111,872 | 1.77E-07 | 0.391 | 0.370 |          |       |  | <i>DDIT4L</i>       | TSS1500 |
| cg26210445 | 2  | 162,273,326 | 0.015671 | 0.391 | 0.402 |          |       |  | <i>TBR1</i>         | 1stExon |
| cg13300480 | 1  | 64,485,696  | 2.38E-16 | 0.391 | 0.376 |          |       |  | <i>ROR1</i>         | Body    |
| cg09792204 | 15 | 28,342,183  | 2.76E-08 | 0.391 | 0.364 |          |       |  | <i>OCA2</i>         | 5'UTR   |



|            |    |             |          |       |       |          |       |  |                     |         |
|------------|----|-------------|----------|-------|-------|----------|-------|--|---------------------|---------|
| cg15788639 | 6  | 29,974,251  | 9.39E-08 | 0.391 | 0.386 |          |       |  | <i>HLA-J</i>        | Body    |
| cg08481002 | 11 | 78,131,601  | 2.24E-10 | 0.391 | 0.383 |          |       |  |                     |         |
| cg21790626 | 19 | 58,220,494  | 4.34E-06 | 0.391 | 0.334 | 2.94E-21 | 0.328 |  | <i>ZNF154</i>       | 5'UTR   |
| cg04153838 | 12 | 115,132,015 | 8.69E-09 | 0.391 | 0.415 |          |       |  |                     |         |
| cg14262681 | 20 | 21,084,420  | 0.031861 | 0.391 | 0.499 |          |       |  |                     |         |
| cg06767766 | 10 | 70,321,383  | 2.95E-05 | 0.391 | 0.218 |          |       |  | <i>TET1</i>         | 5'UTR   |
| cg16970232 | 5  | 112,073,433 | 0.001542 | 0.391 | 0.205 | 5.25E-10 | 0.259 |  | <i>APC</i>          | TSS200  |
| cg14361409 | 14 | 104,584,098 | 4.35E-23 | 0.390 | 0.345 |          |       |  |                     |         |
| cg03354508 | 6  | 147,769,498 | 4.74E-05 | 0.390 | 0.471 |          |       |  |                     |         |
| cg13133835 | 12 | 125,239,803 | 3.5E-25  | 0.390 | 0.403 |          |       |  |                     |         |
| cg19053239 | 2  | 149,645,394 | 3.71E-05 | 0.390 | 0.399 |          |       |  | <i>KIF5C</i>        | Body    |
| cg04434593 | 11 | 67,139,546  | 3.17E-06 | 0.390 | 0.503 |          |       |  | <i>LOC100130987</i> | Body    |
| cg08457178 | 6  | 30,711,636  | 1.02E-20 | 0.390 | 0.392 |          |       |  | <i>IER3</i>         | 3'UTR   |
| cg25859972 | 3  | 64,670,515  | 9.44E-09 | 0.390 | 0.301 |          |       |  | <i>ADAMTS9</i>      | Body    |
| cg23746347 | 22 | 43,058,692  | 1.92E-05 | 0.390 | 0.234 |          |       |  |                     |         |
| cg02156380 | 1  | 180,882,591 | 9.16E-35 | 0.390 | 0.389 |          |       |  | <i>KIAA1614</i>     | Body    |
| cg00099393 | 7  | 157,361,621 | 4.47E-29 | 0.390 | 0.378 |          |       |  | <i>PTPRN2</i>       | Body    |
| cg22761431 | 17 | 7,609,416   | 1.3E-18  | 0.390 | 0.344 |          |       |  | <i>EFNB3</i>        | Body    |
| cg02384967 | 5  | 159,738,801 | 6.35E-09 | 0.390 | 0.326 |          |       |  | <i>CCNJL</i>        | Body    |
| cg00522883 | 11 | 57,194,120  | 1.54E-24 | 0.390 | 0.397 |          |       |  | <i>SLC43A3</i>      | 5'UTR   |
| cg15229124 | 3  | 139,258,912 | 7.47E-07 | 0.390 | 0.357 |          |       |  | <i>RBP1</i>         | TSS1500 |
| cg03388786 | 8  | 56,852,253  | 1.93E-36 | 0.390 | 0.399 |          |       |  | <i>LYN</i>          | 5'UTR   |
| cg07745373 | 11 | 58,941,415  | 4.62E-22 | 0.389 | 0.376 |          |       |  | <i>DTX4</i>         | Body    |
| cg12549300 | 13 | 113,594,776 | 1.09E-25 | 0.389 | 0.361 |          |       |  |                     |         |
| cg05911704 | X  | 129,304,869 | 3.31E-08 | 0.389 | 0.276 |          |       |  | <i>RAB33A</i>       | TSS1500 |
| cg12763828 | 1  | 9,129,646   | 2.5E-25  | 0.389 | 0.354 |          |       |  | <i>SLC2A5</i>       | 5'UTR   |
| cg00347904 | 6  | 35,182,508  | 8.99E-08 | 0.389 | 0.375 | 2.82E-14 | 0.232 |  | <i>SCUBE3</i>       | Body    |
| cg14192401 | 2  | 233,368,543 | 8.15E-25 | 0.389 | 0.346 |          |       |  |                     |         |
| cg14603620 | 17 | 38,334,166  | 1.4E-06  | 0.389 | 0.330 |          |       |  | <i>RAPGEFL1</i>     | TSS200  |
| cg23258881 | 1  | 150,123,037 | 0.006021 | 0.389 | 0.253 |          |       |  | <i>PLEKHO1</i>      | Body    |
| cg03205103 | 5  | 38,257,541  | 6.02E-10 | 0.389 | 0.380 |          |       |  | <i>EGFLAM</i>       | TSS1500 |
| cg05209518 | 2  | 227,288,518 | 5.14E-08 | 0.389 | 0.390 |          |       |  |                     |         |
| cg18513062 | 17 | 763,049     | 7.22E-14 | 0.389 | 0.352 |          |       |  | <i>NXN</i>          | Body    |
| cg09789590 | 19 | 46,800,479  | 2.11E-11 | 0.389 | 0.385 |          |       |  | <i>HIF3A</i>        | Body    |

|            |    |             |          |       |       |          |       |  |                |         |
|------------|----|-------------|----------|-------|-------|----------|-------|--|----------------|---------|
| cg06039161 | 11 | 70,672,835  | 1.42E-28 | 0.389 | 0.363 |          |       |  | <i>SHANK2</i>  | Body    |
| cg02709432 | 8  | 120,651,236 | 4.96E-08 | 0.389 | 0.442 |          |       |  | <i>ENPP2</i>   | TSS200  |
| cg24098326 | 10 | 123,923,050 | 7.13E-28 | 0.389 | 0.380 |          |       |  | <i>TACC2</i>   | Body    |
| cg04510153 | 1  | 162,660,951 | 5.51E-29 | 0.389 | 0.372 |          |       |  | <i>DDR2</i>    | 5'UTR   |
| cg24035164 | 10 | 93,646,991  | 1.08E-07 | 0.389 | 0.344 |          |       |  |                |         |
| cg04452959 | 8  | 120,651,190 | 1.48E-05 | 0.389 | 0.396 |          |       |  | <i>ENPP2</i>   | TSS200  |
| cg04804877 | 12 | 3,862,225   | 0.03327  | 0.389 | 0.266 |          |       |  | <i>EFCAB4B</i> | 1stExon |
| cg12435415 | 3  | 186,490,344 | 5.98E-06 | 0.389 | 0.420 |          |       |  |                |         |
| cg08378442 | 2  | 220,117,704 | 4.03E-10 | 0.389 | 0.393 |          |       |  | <i>TUBA4B</i>  | TSS1500 |
| cg10648670 | 2  | 25,439,375  | 0.005199 | 0.389 | 0.299 |          |       |  |                |         |
| cg18674980 | 8  | 86,350,581  | 1.08E-09 | 0.389 | 0.363 | 5.39E-20 | 0.214 |  | <i>CA3</i>     | TSS1500 |
| cg10365984 | 6  | 91,004,430  | 1.25E-06 | 0.389 | 0.332 |          |       |  | <i>BACH2</i>   | 5'UTR   |
| cg12737160 | X  | 107,681,482 | 4.58E-05 | 0.389 | 0.365 |          |       |  | <i>COL4A6</i>  | 1stExon |
| cg12232308 | 6  | 30,711,580  | 6.18E-36 | 0.389 | 0.385 |          |       |  | <i>IER3</i>    | 3'UTR   |
| cg01499815 | 6  | 29,895,074  | 4.5E-10  | 0.389 | 0.371 |          |       |  |                |         |
| cg21951457 | 10 | 123,923,450 | 4.5E-32  | 0.389 | 0.378 |          |       |  | <i>TACC2</i>   | Body    |
| cg09109520 | 16 | 57,673,258  | 4.91E-25 | 0.389 | 0.367 |          |       |  | <i>GPR56</i>   | 5'UTR   |
| cg23660154 | 1  | 110,626,540 | 5.25E-05 | 0.389 | 0.366 |          |       |  |                |         |
| cg03367519 | 5  | 58,334,910  | 2.4E-20  | 0.389 | 0.388 |          |       |  | <i>PDE4D</i>   | Body    |
| cg17648080 | 17 | 2,141,841   | 8.67E-11 | 0.389 | 0.386 |          |       |  | <i>SMG6</i>    | Body    |
| cg27651229 | 4  | 780,336     | 3.39E-31 | 0.389 | 0.377 |          |       |  | <i>CPLX1</i>   | Body    |
| cg07417745 | 2  | 228,582,488 | 2.69E-06 | 0.389 | 0.263 |          |       |  | <i>SLC19A3</i> | 5'UTR   |
| cg14258341 | 1  | 46,914,023  | 3.54E-12 | 0.389 | 0.370 |          |       |  |                |         |
| cg06444282 | 1  | 20,669,975  | 0.000164 | 0.389 | 0.355 |          |       |  | <i>VWA5B1</i>  | Body    |
| cg21918559 | X  | 36,976,052  | 1.04E-12 | 0.389 | 0.320 |          |       |  |                |         |
| cg02486904 | 1  | 47,999,051  | 9.23E-26 | 0.388 | 0.364 |          |       |  |                |         |
| cg24886257 | 19 | 52,452,447  | 0.002939 | 0.388 | 0.397 |          |       |  |                |         |
| cg18607529 | 7  | 50,343,869  | 6.46E-08 | 0.388 | 0.378 |          |       |  | <i>IKZF1</i>   | TSS1500 |
| cg22659676 | 5  | 139,525,919 | 1.91E-40 | 0.388 | 0.377 |          |       |  |                |         |
| cg02029926 | 4  | 74,734,874  | 7.23E-05 | 0.388 | 0.291 | 5.95E-31 | 0.263 |  | <i>CXCL1</i>   | TSS1500 |
| cg00552704 | 6  | 32,121,420  | 4.92E-13 | 0.388 | 0.372 |          |       |  | <i>PPT2</i>    | TSS1500 |
| cg23026024 | 6  | 29,974,512  | 7.94E-12 | 0.388 | 0.396 |          |       |  | <i>HLA-J</i>   | Body    |
| cg27260772 | 6  | 50,791,202  | 0.000593 | 0.388 | 0.459 |          |       |  | <i>TFAP2B</i>  | Body    |
| cg16127594 | 1  | 95,393,115  | 0.006654 | 0.388 | 0.171 |          |       |  | <i>CNN3</i>    | TSS1500 |

|            |    |             |          |       |       |          |       |     |                 |         |  |
|------------|----|-------------|----------|-------|-------|----------|-------|-----|-----------------|---------|--|
| cg14207654 | 1  | 43,533,913  | 0.013287 | 0.388 | 0.169 |          |       |     |                 |         |  |
| cg08879470 | 11 | 76,859,056  | 0.000604 | 0.388 | 0.340 |          |       | Yes | <i>MYO7A</i>    | Body    |  |
| cg04175027 | 2  | 123,418,722 | 3.06E-28 | 0.388 | 0.386 |          |       |     |                 |         |  |
| cg13434638 | 15 | 68,723,690  | 6.67E-07 | 0.388 | 0.378 |          |       |     | <i>ITGA11</i>   | Body    |  |
| cg00113096 | 2  | 134,119,805 | 4.71E-15 | 0.388 | 0.347 |          |       |     | <i>NCKAP5</i>   | Body    |  |
| cg22623223 | 7  | 157,484,045 | 8.65E-05 | 0.388 | 0.354 |          |       |     | <i>PTPRN2</i>   | Body    |  |
| cg06970510 | 12 | 52,401,448  | 5.54E-10 | 0.388 | 0.383 |          |       |     | <i>GRASP</i>    | Body    |  |
| cg07220448 | 7  | 16,505,592  | 8.26E-12 | 0.388 | 0.366 |          |       |     | <i>SOSTDC1</i>  | TSS200  |  |
| cg15310857 | 3  | 64,253,534  | 5.07E-17 | 0.388 | 0.384 |          |       |     |                 |         |  |
| cg13117164 | 4  | 54,960,232  | 5.53E-19 | 0.388 | 0.384 |          |       |     |                 |         |  |
| cg19583819 | 5  | 139,283,051 | 3.73E-20 | 0.388 | 0.373 |          |       |     | <i>NRG2</i>     | Body    |  |
| cg13539545 | 14 | 60,973,823  | 4.89E-05 | 0.388 | 0.326 |          |       |     |                 |         |  |
| cg14382750 | 9  | 100,264,941 | 8.17E-11 | 0.388 | 0.345 |          |       |     | <i>TMOD1</i>    | 5'UTR   |  |
| cg23363832 | 3  | 139,258,939 | 1.64E-07 | 0.388 | 0.371 |          |       |     | <i>RBP1</i>     | TSS1500 |  |
| cg25713185 | 2  | 228,582,486 | 3.21E-05 | 0.388 | 0.258 | 4.79E-32 | 0.264 |     | <i>SLC19A3</i>  | 5'UTR   |  |
| cg09025324 | 6  | 116,691,685 | 7.17E-08 | 0.388 | 0.293 | 2.77E-23 | 0.239 |     | <i>DSE</i>      | TSS1500 |  |
| cg14337655 | 19 | 2,282,207   | 0.002368 | 0.388 | 0.322 |          |       |     | <i>C19orf35</i> | TSS200  |  |
| cg13421439 | 18 | 21,199,515  | 3.49E-05 | 0.388 | 0.386 |          |       |     | <i>ANKRD29</i>  | Body    |  |
| cg15923947 | 1  | 2,461,929   | 2.6E-124 | 0.388 | 0.375 |          |       |     | <i>HES5</i>     | TSS1500 |  |
| cg14029629 | X  | 49,023,064  | 8.61E-10 | 0.388 | 0.332 |          |       |     | <i>MAGIX</i>    | 3'UTR   |  |
| cg21306329 | 17 | 73,083,876  | 0.00343  | 0.387 | 0.199 |          |       |     | <i>SLC16A5</i>  | TSS200  |  |
| cg10320061 | X  | 153,094,967 | 2.97E-10 | 0.387 | 0.347 |          |       |     | <i>PDZD4</i>    | Body    |  |
| cg22324567 | 8  | 25,899,434  | 5.01E-16 | 0.387 | 0.370 |          |       |     | <i>EBF2</i>     | Body    |  |
| cg24666993 | 6  | 29,974,991  | 1.16E-10 | 0.387 | 0.379 |          |       |     | <i>HLA-J</i>    | Body    |  |
| cg06480736 | 5  | 101,632,321 | 1.27E-07 | 0.387 | 0.382 |          |       |     | <i>SLCO4C1</i>  | TSS200  |  |
| cg06861841 | 11 | 62,212,114  | 1.06E-12 | 0.387 | 0.372 |          |       |     | <i>AHNAK</i>    | Body    |  |
| cg04098270 | 15 | 72,489,686  | 1.45E-19 | 0.387 | 0.318 |          |       |     | <i>GRAMD2</i>   | Body    |  |
| cg23808946 | 2  | 45,169,548  | 8.13E-07 | 0.387 | 0.316 |          |       |     | <i>SIX3</i>     | 1stExon |  |
| cg23782734 | 10 | 3,109,041   | 2.29E-11 | 0.387 | 0.397 |          |       |     | <i>PFKP</i>     | TSS1500 |  |
| cg20442697 | 7  | 102,553,432 | 1.38E-31 | 0.387 | 0.356 | 1.84E-23 | 0.275 | Yes | <i>LRRC17</i>   | 5'UTR   |  |
| cg15677957 | 18 | 47,088,780  | 3.11E-08 | 0.387 | 0.368 |          |       |     | <i>LIPG</i>     | Body    |  |
| cg17403609 | 5  | 180,075,862 | 1.36E-20 | 0.387 | 0.387 |          |       |     | <i>FLT4</i>     | Body    |  |
| cg12084388 | 3  | 42,056,663  | 3.13E-24 | 0.387 | 0.332 |          |       |     |                 |         |  |
| cg04579966 | 13 | 24,846,221  | 0.026037 | 0.387 | 0.099 |          |       |     | <i>SPATA13</i>  | Body    |  |

|            |    |             |          |       |       |          |       |     |                  |         |
|------------|----|-------------|----------|-------|-------|----------|-------|-----|------------------|---------|
| cg00368636 | 7  | 64,734,674  | 3.06E-09 | 0.387 | 0.441 |          |       |     |                  |         |
| cg21747330 | X  | 122,319,602 | 3.54E-26 | 0.387 | 0.384 |          |       |     | <i>GRIA3</i>     | Body    |
| cg13011388 | 14 | 23,834,909  | 1.45E-10 | 0.387 | 0.370 |          |       |     | <i>EFS</i>       | TSS200  |
| cg26747885 | 17 | 76,355,701  | 1.02E-05 | 0.387 | 0.365 |          |       |     | <i>SOCS3</i>     | 5'UTR   |
| cg14202850 | 17 | 43,974,869  | 7E-22    | 0.387 | 0.360 |          |       |     | <i>MAPT</i>      | 5'UTR   |
| cg19010054 | 19 | 51,416,010  | 1.17E-18 | 0.387 | 0.378 |          |       |     |                  |         |
| cg13853894 | 10 | 34,393,934  | 1.05E-15 | 0.387 | 0.342 |          |       |     |                  |         |
| cg10397527 | 6  | 32,977,217  | 4.26E-06 | 0.386 | 0.385 |          |       |     | <i>HLA-DOA</i>   | Body    |
| cg12749863 | 21 | 26,934,576  | 0.004289 | 0.386 | 0.339 |          |       |     | <i>MIR155HG</i>  | Body    |
| cg07207490 | 11 | 118,492,463 | 1.91E-19 | 0.386 | 0.383 |          |       |     | <i>PHLDB1</i>    | Body    |
| cg02564134 | 3  | 125,899,754 | 4.33E-06 | 0.386 | 0.338 |          |       |     | <i>ALDH1L1</i>   | TSS1500 |
| cg14485185 | 11 | 118,051,260 | 8.7E-22  | 0.386 | 0.379 |          |       |     |                  |         |
| cg17205324 | 14 | 23,835,595  | 1.22E-23 | 0.386 | 0.382 |          |       |     | <i>EFS</i>       | TSS1500 |
| cg15244049 | 6  | 10,883,376  | 3.64E-10 | 0.386 | 0.416 |          |       |     | <i>GCM2</i>      | TSS1500 |
| cg24158259 | 11 | 58,984,544  | 3.16E-05 | 0.386 | 0.341 |          |       | Yes |                  |         |
| cg22700691 | 10 | 21,814,388  | 0.038524 | 0.386 | 0.326 |          |       |     | <i>C10orf140</i> | 5'UTR   |
| cg14329059 | 11 | 58,940,964  | 1.94E-32 | 0.386 | 0.391 |          |       |     | <i>DTX4</i>      | Body    |
| cg19214916 | X  | 73,642,734  | 2.31E-29 | 0.386 | 0.357 |          |       |     | <i>SLC16A2</i>   | Body    |
| cg14654886 | 4  | 5,710,319   | 0.001653 | 0.386 | 0.338 |          |       |     | <i>EVC2</i>      | 5'UTR   |
| cg02822259 | 17 | 61,615,504  | 1.8E-29  | 0.386 | 0.345 |          |       |     | <i>KCNH6</i>     | Body    |
| cg15129506 | 2  | 27,958,712  | 7.54E-17 | 0.386 | 0.301 |          |       |     |                  |         |
| cg11873482 | 7  | 97,361,244  | 2.83E-05 | 0.386 | 0.354 |          |       |     | <i>TAC1</i>      | TSS200  |
| cg24512400 | 19 | 51,522,561  | 0.000433 | 0.386 | 0.376 | 6.43E-28 | 0.283 |     | <i>KLK10</i>     | 5'UTR   |
| cg18009321 | 20 | 25,129,457  | 1.4E-08  | 0.386 | 0.370 |          |       |     | <i>LOC284798</i> | TSS1500 |
| cg24680586 | 10 | 105,036,727 | 0.000547 | 0.386 | 0.379 |          |       |     | <i>INA</i>       | TSS200  |
| cg07161429 | 12 | 105,114,162 | 8.45E-06 | 0.386 | 0.332 |          |       |     | <i>CHST11</i>    | Body    |
| cg10558887 | 13 | 36,919,409  | 0.016614 | 0.386 | 0.470 |          |       |     | <i>SPG20</i>     | 5'UTR   |
| cg27219841 | 16 | 3,079,423   | 2.83E-22 | 0.386 | 0.392 |          |       |     | <i>CCDC64B</i>   | Body    |
| cg08542865 | 6  | 2,842,248   | 1.41E-06 | 0.386 | 0.367 |          |       |     | <i>SERPINB1</i>  | TSS200  |
| cg12506775 | 10 | 5,734,571   | 4.21E-09 | 0.386 | 0.346 |          |       |     | <i>C10orf18</i>  | 5'UTR   |
| cg14568259 | 9  | 127,421,654 | 0.002754 | 0.386 | 0.209 |          |       |     | <i>NR6A1</i>     | Body    |
| cg19807257 | 1  | 46,951,354  | 0.001974 | 0.386 | 0.345 |          |       |     |                  |         |
| cg03296797 | 16 | 84,870,066  | 2.17E-29 | 0.386 | 0.384 |          |       |     | <i>CRISPLD2</i>  | 5'UTR   |
| cg25799986 | 20 | 44,098,281  | 5E-08    | 0.386 | 0.284 | 1.04E-27 | 0.224 |     | <i>WFDC2</i>     | TSS200  |

|            |    |             |          |       |       |          |       |  |                  |         |
|------------|----|-------------|----------|-------|-------|----------|-------|--|------------------|---------|
| cg06088745 | 16 | 54,317,413  | 0.000941 | 0.386 | 0.400 |          |       |  | <i>IRX3</i>      | 3'UTR   |
| cg02201914 | 4  | 85,299,913  | 1.82E-12 | 0.386 | 0.381 |          |       |  |                  |         |
| cg06150195 | 16 | 11,275,874  | 1.47E-09 | 0.385 | 0.415 |          |       |  | <i>CLEC16A</i>   | 3'UTR   |
| cg12433395 | 12 | 106,533,667 | 1.37E-13 | 0.385 | 0.336 |          |       |  | <i>NUAK1</i>     | 5'UTR   |
| cg19403029 | 8  | 10,587,055  | 2.6E-15  | 0.385 | 0.359 |          |       |  | <i>SOX7</i>      | Body    |
| cg17020562 | 18 | 59,560,495  | 7.56E-14 | 0.385 | 0.327 |          |       |  | <i>RNF152</i>    | TSS200  |
| cg14315558 | 21 | 26,934,682  | 0.007972 | 0.385 | 0.357 |          |       |  | <i>MIR155HG</i>  | Body    |
| cg19670286 | 5  | 137,610,127 | 0.000382 | 0.385 | 0.359 |          |       |  | <i>GFRA3</i>     | 1stExon |
| cg18009325 | X  | 47,441,605  | 0.000779 | 0.385 | 0.390 |          |       |  | <i>SYN1</i>      | Body    |
| cg22035501 | 5  | 112,073,398 | 0.015669 | 0.385 | 0.200 |          |       |  | <i>APC</i>       | TSS200  |
| cg02886589 | 2  | 39,892,450  | 0.000703 | 0.385 | 0.410 |          |       |  | <i>TMEM178</i>   | TSS1500 |
| cg10614809 | 7  | 51,539,190  | 9.12E-31 | 0.385 | 0.379 |          |       |  |                  |         |
| cg16859884 | 19 | 5,829,172   | 1.79E-07 | 0.385 | 0.261 |          |       |  |                  |         |
| cg21116447 | 6  | 31,831,803  | 1.58E-10 | 0.385 | 0.367 |          |       |  | <i>NEU1</i>      | TSS1500 |
| cg09866102 | 16 | 31,214,134  | 0.029351 | 0.385 | 0.181 |          |       |  | <i>PYCARD</i>    | 5'UTR   |
| cg23618344 | 12 | 54,423,428  | 2.02E-09 | 0.385 | 0.356 |          |       |  | <i>HOXC4</i>     | 5'UTR   |
| cg01163842 | 14 | 95,235,125  | 0.000492 | 0.385 | 0.428 |          |       |  | <i>GSC</i>       | Body    |
| cg13455410 | 9  | 79,631,906  | 1.69E-05 | 0.385 | 0.357 |          |       |  |                  |         |
| cg14781281 | 6  | 29,974,868  | 4.82E-10 | 0.385 | 0.393 |          |       |  | <i>HLA-J</i>     | Body    |
| cg11670211 | 11 | 89,224,288  | 5.19E-11 | 0.385 | 0.443 | 2.27E-15 | 0.186 |  | <i>NOX4</i>      | 5'UTR   |
| cg16561266 | 17 | 62,777,777  | 9.32E-05 | 0.385 | 0.296 |          |       |  | <i>LOC146880</i> | Body    |
| cg16517523 | 19 | 42,927,074  | 7.26E-22 | 0.385 | 0.367 |          |       |  | <i>LIPE</i>      | Body    |
| cg09425247 | 10 | 52,178,225  | 0.000332 | 0.385 | 0.415 |          |       |  | <i>SGMS1</i>     | 5'UTR   |
| cg14175690 | 1  | 119,527,638 | 2.55E-09 | 0.384 | 0.328 |          |       |  | <i>TBX15</i>     | 5'UTR   |
| cg12763824 | X  | 153,094,947 | 6.27E-07 | 0.384 | 0.315 |          |       |  | <i>PDZD4</i>     | Body    |
| cg14616251 | 1  | 24,648,696  | 1.42E-05 | 0.384 | 0.419 |          |       |  | <i>GRHL3</i>     | TSS1500 |
| cg08772752 | 3  | 48,632,672  | 0.000318 | 0.384 | 0.414 |          |       |  | <i>COL7A1</i>    | TSS200  |
| cg09500443 | 5  | 180,018,465 | 1.3E-52  | 0.384 | 0.385 |          |       |  | <i>SCGB3A1</i>   | 5'UTR   |
| cg00842351 | 9  | 71,789,653  | 4.19E-11 | 0.384 | 0.360 | 1.79E-10 | 0.219 |  | <i>TJP2</i>      | Body    |
| cg05743713 | 11 | 66,885,240  | 4.6E-07  | 0.384 | 0.399 |          |       |  | <i>KDM2A</i>     | TSS1500 |
| cg15998779 | 3  | 159,756,690 | 9.2E-15  | 0.384 | 0.399 |          |       |  |                  |         |
| cg26233374 | 5  | 43,603,643  | 0.000181 | 0.384 | 0.245 |          |       |  | <i>NNT</i>       | 5'UTR   |
| cg25459558 | 6  | 33,161,290  | 0.00032  | 0.384 | 0.341 |          |       |  | <i>COL11A2</i>   | TSS1500 |
| cg16337138 | X  | 36,976,075  | 1.91E-08 | 0.384 | 0.391 |          |       |  |                  |         |

|            |    |             |          |       |       |          |       |     |                 |         |
|------------|----|-------------|----------|-------|-------|----------|-------|-----|-----------------|---------|
| cg22058855 | 6  | 27,064,968  | 0.001928 | 0.384 | 0.332 |          |       |     |                 |         |
| cg16807089 | 7  | 143,582,499 | 6.87E-14 | 0.384 | 0.407 |          |       |     | <i>FAM115A</i>  | 5'UTR   |
| cg06060135 | 5  | 3,596,704   | 0.00023  | 0.384 | 0.431 |          |       |     | <i>IRX1</i>     | Body    |
| cg24428325 | 6  | 44,529,081  | 8.12E-07 | 0.384 | 0.323 |          |       |     |                 |         |
| cg15574705 | 1  | 58,715,744  | 0.000143 | 0.384 | 0.389 |          |       | Yes | <i>DAB1</i>     | 5'UTR   |
| cg14470792 | 4  | 183,168,158 | 0.002761 | 0.384 | 0.235 |          |       |     |                 |         |
| cg04542030 | 2  | 74,375,469  | 7.65E-21 | 0.384 | 0.316 |          |       |     | <i>BOLA3</i>    | TSS1500 |
| cg10446179 | 6  | 121,758,653 | 2.31E-05 | 0.384 | 0.433 |          |       |     | <i>GJA1</i>     | 5'UTR   |
| cg22340072 | 8  | 61,822,740  | 1.66E-05 | 0.384 | 0.384 |          |       |     |                 |         |
| cg09806262 | 10 | 45,914,949  | 1.01E-06 | 0.384 | 0.377 |          |       |     | <i>ALOX5</i>    | Body    |
| cg20216854 | X  | 19,817,872  | 2.51E-05 | 0.384 | 0.386 |          |       |     | <i>SH3KBP1</i>  | Body    |
| cg13273396 | 12 | 81,471,867  | 5.74E-07 | 0.383 | 0.343 |          |       |     | <i>ACSS3</i>    | 1stExon |
| cg26987597 | 6  | 1,391,207   | 0.001902 | 0.383 | 0.366 |          |       |     | <i>FOXF2</i>    | 1stExon |
| cg04281464 | 14 | 70,014,873  | 0.000595 | 0.383 | 0.344 |          |       |     |                 |         |
| cg27395066 | 17 | 43,221,220  | 8.23E-23 | 0.383 | 0.364 |          |       |     | <i>ACBD4</i>    | 3'UTR   |
| cg00329697 | 1  | 45,286,062  | 1.08E-13 | 0.383 | 0.410 |          |       |     | <i>PTCH2</i>    | 3'UTR   |
| cg01235820 | 20 | 642,782     | 4.05E-05 | 0.383 | 0.335 |          |       |     | <i>SCRT2</i>    | 3'UTR   |
| cg07478468 | 1  | 85,464,000  | 3.87E-11 | 0.383 | 0.375 |          |       |     | <i>MCOLN2</i>   | TSS1500 |
| cg18552861 | 2  | 20,865,845  | 0.000178 | 0.383 | 0.360 |          |       |     | <i>GDF7</i>     | TSS1500 |
| cg12594800 | X  | 129,243,426 | 5.01E-11 | 0.383 | 0.362 |          |       |     | <i>ELF4</i>     | 5'UTR   |
| cg17121747 | 4  | 683,060     | 2.37E-22 | 0.383 | 0.381 |          |       |     | <i>MFSD7</i>    | TSS200  |
| cg04784699 | 1  | 119,870,478 | 3.05E-26 | 0.383 | 0.352 |          |       |     |                 |         |
| cg04407470 | 6  | 108,489,977 | 4.35E-06 | 0.383 | 0.376 |          |       |     | <i>NR2E1</i>    | Body    |
| cg12689285 | 20 | 42,875,765  | 1.21E-19 | 0.383 | 0.304 |          |       |     | <i>GDAP1L1</i>  | TSS200  |
| cg20988073 | 3  | 125,900,093 | 1.8E-15  | 0.383 | 0.337 |          |       |     | <i>ALDH1L1</i>  | TSS1500 |
| cg11989330 | 1  | 65,468,827  | 0.00026  | 0.383 | 0.255 |          |       |     |                 |         |
| cg18085998 | 1  | 33,938,224  | 0.018041 | 0.383 | 0.363 |          |       |     | <i>ZSCAN20</i>  | TSS200  |
| cg13212283 | 12 | 57,632,120  | 6.26E-33 | 0.383 | 0.353 |          |       |     | <i>NDUFA4L2</i> | 5'UTR   |
| cg23138678 | 14 | 75,894,283  | 0.037915 | 0.383 | 0.178 |          |       |     | <i>JDP2</i>     | TSS1500 |
| cg26067203 | 1  | 1,935,289   | 0.000344 | 0.383 | 0.421 |          |       |     | <i>KIAA1751</i> | TSS200  |
| cg03356734 | 20 | 37,230,413  | 1.69E-47 | 0.383 | 0.374 |          |       |     | <i>C20orf95</i> | TSS200  |
| cg20311501 | 5  | 112,073,502 | 0.000326 | 0.383 | 0.206 | 3.48E-10 | 0.184 |     | <i>APC</i>      | TSS200  |
| cg13379827 | 1  | 65,468,782  | 0.002489 | 0.383 | 0.244 |          |       |     |                 |         |
| cg12506930 | 19 | 58,220,718  | 3.16E-09 | 0.383 | 0.330 |          |       |     | <i>ZNF154</i>   | TSS200  |

|            |    |             |          |       |       |          |       |  |                  |         |
|------------|----|-------------|----------|-------|-------|----------|-------|--|------------------|---------|
| cg11849086 | 17 | 62,776,530  | 0.00052  | 0.382 | 0.301 |          |       |  | <i>LOC146880</i> | Body    |
| cg16898833 | 6  | 26,189,333  | 0.002172 | 0.382 | 0.373 |          |       |  | <i>HIST1H4D</i>  | TSS200  |
| cg24578679 | 15 | 74,658,573  | 1.33E-05 | 0.382 | 0.359 |          |       |  | <i>CYP11A1</i>   | Body    |
| cg16361890 | 5  | 179,220,545 | 1.31E-22 | 0.382 | 0.356 | 2.97E-30 | 0.210 |  | <i>LTC4S</i>     | TSS1500 |
| cg19696083 | 12 | 54,438,419  | 5.32E-11 | 0.382 | 0.301 |          |       |  | <i>HOXC4</i>     | 5'UTR   |
| cg06186698 | 3  | 138,666,118 | 0.00526  | 0.382 | 0.280 |          |       |  | <i>C3orf72</i>   | 5'UTR   |
| cg22984571 | 3  | 186,490,656 | 1.31E-07 | 0.382 | 0.377 |          |       |  |                  |         |
| cg23305408 | 1  | 32,169,701  | 2.69E-11 | 0.382 | 0.342 |          |       |  | <i>COL16A1</i>   | 1stExon |
| cg21159128 | 1  | 54,693,933  | 2.06E-55 | 0.382 | 0.383 |          |       |  | <i>SSBP3</i>     | Body    |
| cg01799653 | 5  | 10,563,501  | 6.72E-31 | 0.382 | 0.351 |          |       |  | <i>ANKRD33B</i>  | TSS1500 |
| cg23041295 | 5  | 15,502,456  | 2.18E-17 | 0.382 | 0.384 |          |       |  | <i>FBXL7</i>     | Body    |
| cg12138678 | 13 | 43,566,618  | 5.98E-06 | 0.382 | 0.372 |          |       |  | <i>EPSTI1</i>    | TSS1500 |
| cg00218447 | 12 | 54,428,171  | 3.84E-07 | 0.382 | 0.335 |          |       |  | <i>HOXC4</i>     | 5'UTR   |
| cg17649385 | 8  | 91,997,985  | 1.01E-07 | 0.382 | 0.348 |          |       |  |                  |         |
| cg15654259 | 1  | 116,371,187 | 2.33E-05 | 0.382 | 0.351 |          |       |  |                  |         |
| cg00932276 | X  | 13,587,976  | 1.72E-05 | 0.382 | 0.408 | 7.85E-24 | 0.304 |  | <i>EGFL6</i>     | 5'UTR   |
| cg03683587 | X  | 50,557,066  | 0.031434 | 0.382 | 0.408 |          |       |  | <i>SHROOM4</i>   | TSS200  |
| cg12092201 | 2  | 43,451,775  | 3.46E-06 | 0.382 | 0.357 |          |       |  | <i>ZFP36L2</i>   | Body    |
| cg06085985 | 11 | 830,527     | 8.17E-09 | 0.382 | 0.404 |          |       |  | <i>EFCAB4A</i>   | Body    |
| cg26348514 | 20 | 44,098,358  | 3.78E-06 | 0.382 | 0.251 |          |       |  | <i>WFDC2</i>     | TSS200  |
| cg04849842 | 8  | 140,714,610 | 4.91E-08 | 0.382 | 0.396 |          |       |  | <i>KCNK9</i>     | Body    |
| cg14110111 | 9  | 4,297,626   | 9.14E-05 | 0.381 | 0.273 |          |       |  | <i>GLIS3</i>     | 5'UTR   |
| cg11906781 | 2  | 28,183,394  | 1.6E-29  | 0.381 | 0.372 |          |       |  | <i>BRE</i>       | Body    |
| cg27014380 | 3  | 133,393,454 | 0.000003 | 0.381 | 0.401 |          |       |  |                  |         |
| cg27434509 | 4  | 5,710,337   | 0.000182 | 0.381 | 0.312 |          |       |  | <i>EVC2</i>      | 5'UTR   |
| cg23738624 | 7  | 142,553,157 | 0.007915 | 0.381 | 0.322 |          |       |  | <i>EPHB6</i>     | 5'UTR   |
| cg16510657 | X  | 100,333,950 | 6.65E-06 | 0.381 | 0.345 | 3.01E-15 | 0.228 |  | <i>TMEM35</i>    | 1stExon |
| cg05933736 | 13 | 109,248,331 | 4.16E-06 | 0.381 | 0.282 |          |       |  | <i>MYO16</i>     | TSS200  |
| cg25764899 | 1  | 47,697,948  | 1.18E-06 | 0.381 | 0.387 |          |       |  |                  |         |
| cg14597214 | 8  | 38,585,937  | 1.1E-18  | 0.381 | 0.382 |          |       |  | <i>TACC1</i>     | 1stExon |
| cg25810484 | 12 | 54,089,486  | 2.5E-06  | 0.381 | 0.357 |          |       |  |                  |         |
| cg10062049 | 7  | 116,140,267 | 1.28E-09 | 0.381 | 0.339 |          |       |  | <i>CAV2</i>      | Body    |
| cg23941434 | 5  | 147,162,161 | 7.29E-05 | 0.381 | 0.331 |          |       |  | <i>JAKMIP2</i>   | 5'UTR   |
| cg08844698 | 16 | 85,185,607  | 1.2E-28  | 0.381 | 0.345 |          |       |  |                  |         |

|            |    |             |          |       |       |          |       |  |                 |         |
|------------|----|-------------|----------|-------|-------|----------|-------|--|-----------------|---------|
| cg08193579 | 3  | 169,529,701 | 6.8E-05  | 0.381 | 0.233 |          |       |  | <i>LRR34</i>    | Body    |
| cg05736236 | 2  | 222,435,214 | 2.24E-16 | 0.381 | 0.329 |          |       |  | <i>EPHA4</i>    | Body    |
| cg06909469 | 2  | 96,990,800  | 4.83E-20 | 0.381 | 0.374 |          |       |  | <i>ITPRIPL1</i> | TSS1500 |
| cg27282900 | 6  | 30,095,258  | 3.98E-14 | 0.381 | 0.397 |          |       |  |                 |         |
| cg17419626 | 12 | 53,268,268  | 1.46E-09 | 0.381 | 0.300 |          |       |  |                 |         |
| cg00466108 | 1  | 65,731,689  | 0.000286 | 0.381 | 0.304 |          |       |  | <i>DNAJC6</i>   | Body    |
| cg27432826 | 1  | 110,672,769 | 4.93E-17 | 0.381 | 0.364 |          |       |  |                 |         |
| cg10219157 | 4  | 2,395,549   | 6.09E-07 | 0.381 | 0.253 |          |       |  | <i>ZFYVE28</i>  | Body    |
| cg22444124 | 1  | 226,867,960 | 7.18E-06 | 0.381 | 0.400 |          |       |  | <i>ITPKB</i>    | Body    |
| cg07489502 | 5  | 140,811,642 | 0.000115 | 0.381 | 0.351 |          |       |  | <i>PCDHGA4</i>  | Body    |
| cg11940285 | 3  | 129,693,385 | 1.63E-11 | 0.381 | 0.381 |          |       |  | <i>TRH</i>      | 5'UTR   |
| cg23132268 | 5  | 147,162,169 | 6.01E-06 | 0.380 | 0.325 |          |       |  | <i>JAKMIP2</i>  | 5'UTR   |
| cg05326023 | 6  | 30,418,908  | 2.09E-09 | 0.380 | 0.380 |          |       |  |                 |         |
| cg26573704 | 5  | 33,892,223  | 0.000243 | 0.380 | 0.345 |          |       |  | <i>ADAMTS12</i> | TSS200  |
| cg15777964 | 21 | 44,847,606  | 0.002623 | 0.380 | 0.320 |          |       |  | <i>SIK1</i>     | TSS1500 |
| cg14777768 | 3  | 170,746,265 | 6.2E-11  | 0.380 | 0.335 |          |       |  | <i>SLC2A2</i>   | TSS1500 |
| cg15835232 | 17 | 53,343,075  | 3.17E-10 | 0.380 | 0.369 |          |       |  | <i>HLF</i>      | Body    |
| cg16277214 | 3  | 32,434,339  | 1.38E-06 | 0.380 | 0.309 |          |       |  | <i>CMTM7</i>    | Body    |
| cg11335133 | 1  | 90,309,559  | 2.99E-05 | 0.380 | 0.297 |          |       |  | <i>LRR8D</i>    | 5'UTR   |
| cg14826711 | 1  | 169,396,909 | 4.27E-16 | 0.380 | 0.353 |          |       |  | <i>C1orf114</i> | TSS1500 |
| cg09333221 | 7  | 30,804,200  | 3.31E-25 | 0.380 | 0.388 |          |       |  |                 |         |
| cg27015057 | 5  | 141,703,946 | 0.001899 | 0.380 | 0.390 |          |       |  | <i>SPRY4</i>    | 5'UTR   |
| cg00778995 | 2  | 105,470,558 | 0.000904 | 0.380 | 0.354 |          |       |  | <i>POU3F3</i>   | TSS1500 |
| cg25524962 | 13 | 20,735,819  | 1.66E-06 | 0.380 | 0.376 |          |       |  | <i>GJA3</i>     | TSS1500 |
| cg00338801 | 1  | 70,035,208  | 9.86E-05 | 0.380 | 0.401 |          |       |  |                 |         |
| cg04394267 | 3  | 55,523,950  | 0.018576 | 0.380 | 0.208 |          |       |  |                 |         |
| cg15444597 | 10 | 103,881,107 | 2.12E-28 | 0.380 | 0.386 |          |       |  | <i>LDB1</i>     | TSS1500 |
| cg03698393 | 15 | 89,438,795  | 1.15E-10 | 0.380 | 0.329 | 8.87E-26 | 0.204 |  | <i>HAPLN3</i>   | TSS200  |
| cg19005168 | 13 | 27,092,836  | 1.07E-23 | 0.380 | 0.369 |          |       |  |                 |         |
| cg00142266 | 15 | 77,789,307  | 0.003211 | 0.380 | 0.349 |          |       |  |                 |         |
| cg18156204 | 17 | 71,948,613  | 9.51E-12 | 0.380 | 0.351 |          |       |  |                 |         |
| cg02124446 | 16 | 85,783,537  | 7.22E-20 | 0.380 | 0.332 |          |       |  | <i>C16orf74</i> | 5'UTR   |
| cg15523958 | 2  | 43,864,929  | 1.63E-08 | 0.380 | 0.304 |          |       |  | <i>PLEKHH2</i>  | 5'UTR   |
| cg07557560 | 5  | 134,914,642 | 3.35E-18 | 0.380 | 0.322 |          |       |  | <i>CXCL14</i>   | 5'UTR   |



|            |    |             |          |       |       |          |       |  |              |         |
|------------|----|-------------|----------|-------|-------|----------|-------|--|--------------|---------|
| cg17407511 | X  | 38,080,364  | 1.41E-09 | 0.380 | 0.336 |          |       |  | SRPX         | TSS200  |
| cg02288341 | 5  | 137,610,226 | 0.002799 | 0.380 | 0.303 |          |       |  | GFRA3        | 1stExon |
| cg13933043 | 7  | 130,696,871 | 9.72E-14 | 0.380 | 0.421 |          |       |  | FLJ43663     | Body    |
| cg24543696 | 11 | 12,031,046  | 0.000112 | 0.380 | 0.300 |          |       |  | DKK3         | TSS1500 |
| cg04026379 | X  | 47,483,043  | 0.026266 | 0.380 | 0.107 |          |       |  |              |         |
| cg03220455 | 17 | 74,582,984  | 1.84E-19 | 0.380 | 0.344 |          |       |  | ST6GALNAC2   | TSS1500 |
| cg08985979 | 4  | 183,062,576 | 1.26E-12 | 0.380 | 0.302 |          |       |  | MGC45800     | Body    |
| cg17810176 | 19 | 36,035,831  | 0.002219 | 0.380 | 0.171 |          |       |  | GAPDHS       | Body    |
| cg09548780 | 2  | 218,770,270 | 3.06E-27 | 0.379 | 0.382 |          |       |  | TNS1         | 5'UTR   |
| cg15949044 | 5  | 140,864,549 | 4.85E-08 | 0.379 | 0.381 |          |       |  | PCDHGA4      | Body    |
| cg24034005 | 14 | 97,059,192  | 1.26E-06 | 0.379 | 0.367 |          |       |  |              |         |
| cg09089242 | 11 | 33,892,236  | 8.88E-19 | 0.379 | 0.330 |          |       |  | LMO2         | TSS1500 |
| cg01379240 | 3  | 138,666,144 | 0.004433 | 0.379 | 0.299 |          |       |  | C3orf72      | 5'UTR   |
| cg18673954 | 10 | 105,036,611 | 2.88E-05 | 0.379 | 0.433 |          |       |  | INA          | TSS1500 |
| cg27506442 | 13 | 30,948,716  | 3.94E-16 | 0.379 | 0.372 |          |       |  | LOC100188949 | TSS1500 |
| cg22796507 | 1  | 47,882,739  | 2.48E-06 | 0.379 | 0.361 |          |       |  | FOXE3        | 1stExon |
| cg19585556 | 7  | 18,535,332  | 1.05E-05 | 0.379 | 0.354 |          |       |  | HDAC9        | TSS1500 |
| cg11720950 | 6  | 32,223,114  | 4.36E-12 | 0.379 | 0.382 |          |       |  |              |         |
| cg14574728 | 9  | 110,187,656 | 1.43E-10 | 0.379 | 0.367 |          |       |  |              |         |
| cg08772003 | 10 | 104,629,869 | 1.02E-14 | 0.379 | 0.297 |          |       |  | AS3MT        | Body    |
| cg00685014 | 11 | 62,212,195  | 3.55E-14 | 0.379 | 0.386 |          |       |  | AHNAK        | Body    |
| cg07330114 | 3  | 11,624,023  | 3.71E-07 | 0.379 | 0.317 |          |       |  | VGLL4        | Body    |
| cg20300175 | 17 | 27,918,316  | 2.4E-55  | 0.379 | 0.374 |          |       |  |              |         |
| cg08195538 | X  | 67,914,130  | 0.000529 | 0.379 | 0.359 |          |       |  | STARD8       | 5'UTR   |
| cg07114310 | 7  | 51,538,921  | 1.27E-11 | 0.379 | 0.332 |          |       |  |              |         |
| cg15410675 | 4  | 154,144,800 | 2E-05    | 0.379 | 0.421 |          |       |  | TRIM2        | Body    |
| cg23605961 | 7  | 751,331     | 6.8E-25  | 0.379 | 0.390 |          |       |  | PRKAR1B      | 5'UTR   |
| cg12002882 | 20 | 62,461,365  | 4.1E-21  | 0.379 | 0.343 |          |       |  |              |         |
| cg20895877 | 14 | 94,254,586  | 2.1E-09  | 0.379 | 0.275 | 9.07E-21 | 0.285 |  | PRIMA1       | 5'UTR   |
| cg11183365 | 6  | 27,064,769  | 4.62E-06 | 0.379 | 0.322 |          |       |  |              |         |
| cg23912429 | 10 | 17,270,431  | 2.27E-08 | 0.379 | 0.438 |          |       |  | VIM          | 5'UTR   |
| cg19943330 | 14 | 24,505,554  | 1.58E-40 | 0.379 | 0.375 |          |       |  | DHRS4L1      | TSS200  |
| cg21990316 | 6  | 29,894,836  | 4.94E-11 | 0.379 | 0.349 |          |       |  | HCG4P6       | TSS1500 |
| cg26567423 | 12 | 54,500,619  | 1.63E-06 | 0.379 | 0.418 |          |       |  | FLJ12825     | Body    |

|            |    |             |          |       |       |          |       |  |                  |         |
|------------|----|-------------|----------|-------|-------|----------|-------|--|------------------|---------|
| cg05998089 | 6  | 29,975,141  | 3.94E-14 | 0.379 | 0.367 |          |       |  | <i>HLA-J</i>     | Body    |
| cg22081371 | 1  | 177,827,903 | 0.000937 | 0.379 | 0.241 |          |       |  |                  |         |
| cg05952494 | 12 | 4,378,316   | 6.88E-06 | 0.379 | 0.372 |          |       |  |                  |         |
| cg23072161 | 1  | 16,489,115  | 4.87E-09 | 0.379 | 0.318 |          |       |  |                  |         |
| cg06530563 | 12 | 115,132,889 | 9.19E-10 | 0.379 | 0.395 |          |       |  |                  |         |
| cg12178980 | 10 | 11,206,870  | 3.43E-06 | 0.379 | 0.210 |          |       |  | <i>CUGBP2</i>    | TSS200  |
| cg07627119 | 15 | 89,906,172  | 0.000306 | 0.378 | 0.363 |          |       |  |                  |         |
| cg24167314 | 12 | 103,311,500 | 0.000713 | 0.378 | 0.195 |          |       |  | <i>PAH</i>       | TSS200  |
| cg10257049 | 5  | 154,230,308 | 3.79E-29 | 0.378 | 0.368 | 7.06E-26 | 0.241 |  | <i>C5orf4</i>    | TSS200  |
| cg16674860 | 10 | 100,206,094 | 5.45E-05 | 0.378 | 0.319 |          |       |  | <i>HPS1</i>      | 5'UTR   |
| cg01779765 | 14 | 62,583,795  | 0.001714 | 0.378 | 0.393 |          |       |  | <i>FLJ43390</i>  | TSS1500 |
| cg18401367 | 5  | 176,107,201 | 0.00141  | 0.378 | 0.427 |          |       |  |                  |         |
| cg11010528 | 6  | 29,894,813  | 5.41E-11 | 0.378 | 0.368 |          |       |  | <i>HCG4P6</i>    | TSS1500 |
| cg01959730 | 1  | 119,548,825 | 1.3E-05  | 0.378 | 0.380 |          |       |  |                  |         |
| cg10588135 | 17 | 59,329,903  | 2.75E-21 | 0.378 | 0.365 |          |       |  | <i>BCAS3</i>     | Body    |
| cg05835105 | 4  | 111,543,401 | 0.000303 | 0.378 | 0.433 |          |       |  | <i>PITX2</i>     | Body    |
| cg24435571 | 10 | 104,436,140 | 1.1E-20  | 0.378 | 0.358 |          |       |  | <i>ARL3</i>      | 3'UTR   |
| cg11482719 | 4  | 57,372,411  | 1.06E-12 | 0.378 | 0.351 |          |       |  | <i>ARL9</i>      | 5'UTR   |
| cg08107689 | 15 | 29,033,901  | 2.63E-07 | 0.378 | 0.377 |          |       |  |                  |         |
| cg09236284 | 7  | 97,361,114  | 1.92E-05 | 0.378 | 0.327 |          |       |  | <i>TAC1</i>      | TSS200  |
| cg11640756 | 6  | 143,247,810 | 0.000526 | 0.378 | 0.226 |          |       |  | <i>HIVEP2</i>    | 5'UTR   |
| cg07104209 | 7  | 27,281,872  | 1.32E-09 | 0.378 | 0.308 |          |       |  | <i>EVX1</i>      | TSS1500 |
| cg18031596 | 8  | 108,510,292 | 1.76E-13 | 0.378 | 0.390 |          |       |  | <i>ANGPT1</i>    | TSS200  |
| cg17080163 | 2  | 123,418,757 | 1.27E-27 | 0.378 | 0.379 |          |       |  |                  |         |
| cg23483840 | 6  | 29,974,844  | 1.66E-14 | 0.378 | 0.389 |          |       |  | <i>HLA-J</i>     | Body    |
| cg11380530 | 12 | 54,389,179  | 0.006401 | 0.378 | 0.363 |          |       |  |                  |         |
| cg21251385 | 20 | 52,277,050  | 4.77E-09 | 0.378 | 0.388 |          |       |  |                  |         |
| cg02900356 | 16 | 31,214,494  | 4.65E-24 | 0.378 | 0.315 |          |       |  | <i>PYCARD</i>    | TSS1500 |
| cg24864241 | 1  | 204,329,158 | 1.58E-33 | 0.378 | 0.371 |          |       |  | <i>PLEKHA6</i>   | TSS200  |
| cg14301024 | 2  | 114,048,932 | 3.27E-09 | 0.378 | 0.356 |          |       |  | <i>LOC440839</i> | Body    |
| cg11809014 | 17 | 39,067,081  | 2.04E-16 | 0.378 | 0.383 |          |       |  |                  |         |
| cg21448423 | 1  | 55,013,956  | 1.83E-19 | 0.377 | 0.364 | 6.01E-14 | 0.169 |  | <i>ACOT11</i>    | 1stExon |
| cg12615766 | 8  | 59,058,273  | 1.41E-37 | 0.377 | 0.370 |          |       |  | <i>FAM110B</i>   | 5'UTR   |
| cg21737039 | 4  | 8,271,391   | 8.22E-09 | 0.377 | 0.336 |          |       |  | <i>HTRA3</i>     | TSS200  |

|            |    |             |          |       |       |          |       |  |     |                  |         |
|------------|----|-------------|----------|-------|-------|----------|-------|--|-----|------------------|---------|
| cg26268701 | 6  | 29,894,737  | 0.012228 | 0.377 | 0.494 |          |       |  |     | <i>HCG4P6</i>    | TSS1500 |
| cg02535674 | 20 | 52,226,352  | 0.00778  | 0.377 | 0.291 |          |       |  |     |                  |         |
| cg14115936 | 7  | 73,002,496  | 1.52E-09 | 0.377 | 0.347 |          |       |  |     |                  |         |
| cg08450752 | 15 | 73,611,451  | 3.97E-08 | 0.377 | 0.363 |          |       |  |     |                  |         |
| cg24161793 | 2  | 96,990,762  | 1.93E-21 | 0.377 | 0.355 |          |       |  |     | <i>ITPRIPL1</i>  | TSS1500 |
| cg10765212 | 2  | 190,044,638 | 1.78E-18 | 0.377 | 0.353 |          |       |  |     | <i>COL5A2</i>    | TSS200  |
| cg21215929 | 5  | 14,873,039  | 3.68E-06 | 0.377 | 0.263 |          |       |  |     | <i>ANKH</i>      | TSS1500 |
| cg23685759 | 10 | 98,945,131  | 2.05E-13 | 0.377 | 0.300 |          |       |  |     | <i>SLIT1</i>     | Body    |
| cg16217794 | 12 | 100,579,233 | 5.33E-23 | 0.377 | 0.370 |          |       |  |     |                  |         |
| cg17032602 | 2  | 129,076,392 | 5.31E-18 | 0.377 | 0.326 |          |       |  |     | <i>HS6ST1</i>    | TSS1500 |
| cg04781339 | 21 | 44,781,686  | 2.32E-07 | 0.377 | 0.341 |          |       |  |     |                  |         |
| cg26786795 | 14 | 20,344,394  | 5.27E-35 | 0.377 | 0.350 |          |       |  | Yes | <i>OR4K2</i>     | TSS200  |
| cg09495977 | 4  | 8,271,507   | 2.54E-06 | 0.377 | 0.259 | 1.18E-21 | 0.216 |  |     | <i>HTRA3</i>     | 5'UTR   |
| cg12211867 | 1  | 108,023,441 | 7.12E-13 | 0.377 | 0.332 |          |       |  |     | <i>NTNG1</i>     | Body    |
| cg05152874 | X  | 50,557,122  | 0.02514  | 0.377 | 0.460 |          |       |  |     | <i>SHROOM4</i>   | TSS200  |
| cg14020762 | 7  | 100,465,657 | 5.87E-24 | 0.377 | 0.382 |          |       |  |     | <i>TRIP6</i>     | Body    |
| cg19667811 | 10 | 30,405,328  | 1.03E-17 | 0.377 | 0.361 |          |       |  |     |                  |         |
| cg02852959 | 12 | 2,944,436   | 1.29E-07 | 0.377 | 0.258 |          |       |  |     | <i>NRIP2</i>     | TSS1500 |
| cg17410236 | 14 | 85,996,495  | 1.93E-05 | 0.377 | 0.331 | 8.64E-19 | 0.253 |  |     | <i>FLRT2</i>     | 1stExon |
| cg06148118 | 11 | 33,892,246  | 1.13E-08 | 0.377 | 0.303 |          |       |  |     | <i>LMO2</i>      | TSS1500 |
| cg03143849 | 11 | 2,904,951   | 5.53E-42 | 0.377 | 0.346 | 1.51E-15 | 0.259 |  |     | <i>CDKN1C</i>    | 3'UTR   |
| cg17777432 | 5  | 172,068,999 | 4.25E-12 | 0.377 | 0.319 |          |       |  |     | <i>NEURL1B</i>   | Body    |
| cg09115984 | 16 | 31,214,426  | 9.82E-18 | 0.377 | 0.297 |          |       |  |     | <i>PYCARD</i>    | TSS200  |
| cg26115228 | 2  | 85,116,113  | 1.67E-23 | 0.377 | 0.385 |          |       |  |     |                  |         |
| cg01720033 | 17 | 62,777,744  | 6.64E-07 | 0.377 | 0.310 |          |       |  |     | <i>LOC146880</i> | Body    |
| cg21225170 | 5  | 137,610,391 | 0.003    | 0.377 | 0.296 |          |       |  |     | <i>GFRA3</i>     | TSS200  |
| cg13634736 | 11 | 3,181,575   | 7.21E-21 | 0.376 | 0.332 |          |       |  |     | <i>OSBPL5</i>    | 5'UTR   |
| cg21304453 | 20 | 3,218,794   | 7.95E-37 | 0.376 | 0.358 |          |       |  |     | <i>SLC4A11</i>   | TSS1500 |
| cg19729649 | 17 | 79,919,727  | 5.5E-15  | 0.376 | 0.368 |          |       |  |     | <i>NOTUM</i>     | TSS1500 |
| cg22549041 | 15 | 75,019,251  | 2.84E-19 | 0.376 | 0.371 |          |       |  |     | <i>CYP1A1</i>    | TSS1500 |
| cg13331354 | 19 | 18,539,841  | 6.99E-06 | 0.376 | 0.260 |          |       |  |     | <i>SSBP4</i>     | Body    |
| cg08332908 | 17 | 38,465,326  | 3.39E-31 | 0.376 | 0.370 |          |       |  |     | <i>RARA</i>      | TSS200  |
| cg00506168 | 21 | 45,148,460  | 0.004016 | 0.376 | 0.254 |          |       |  |     | <i>PDXK</i>      | Body    |
| cg26416887 | 12 | 111,618,925 | 2.23E-10 | 0.376 | 0.307 |          |       |  |     | <i>CUX2</i>      | Body    |

|            |    |             |          |       |       |  |  |  |                   |         |
|------------|----|-------------|----------|-------|-------|--|--|--|-------------------|---------|
| cg18547371 | 19 | 18,539,843  | 7.19E-06 | 0.376 | 0.275 |  |  |  | <i>SSBP4</i>      | Body    |
| cg10373003 | 17 | 18,057,079  | 0.000576 | 0.376 | 0.277 |  |  |  | <i>MYO15A</i>     | Body    |
| cg19414598 | 22 | 38,965,745  | 2.81E-09 | 0.376 | 0.375 |  |  |  | <i>DMC1</i>       | 5'UTR   |
| cg22007861 | 19 | 2,282,439   | 2.71E-20 | 0.376 | 0.374 |  |  |  | <i>C19orf35</i>   | TSS1500 |
| cg01268824 | 19 | 58,220,818  | 5.82E-07 | 0.376 | 0.353 |  |  |  | <i>ZNF154</i>     | TSS1500 |
| cg06908244 | 14 | 100,126,358 | 5.66E-05 | 0.376 | 0.379 |  |  |  | <i>HHIPL1</i>     | Body    |
| cg26469991 | X  | 51,139,481  | 2.54E-06 | 0.376 | 0.353 |  |  |  |                   |         |
| cg15423357 | 2  | 25,149,977  | 6.26E-08 | 0.376 | 0.423 |  |  |  |                   |         |
| cg26315984 | 1  | 173,176,501 | 4.07E-14 | 0.376 | 0.374 |  |  |  | <i>TNFSF4</i>     | TSS200  |
| cg03420881 | 2  | 130,763,516 | 2.39E-12 | 0.376 | 0.405 |  |  |  |                   |         |
| cg12368612 | 12 | 115,135,999 | 4.72E-19 | 0.376 | 0.361 |  |  |  |                   |         |
| cg25908973 | 15 | 45,670,865  | 3.59E-06 | 0.376 | 0.388 |  |  |  | <i>LOC145663</i>  | TSS200  |
| cg14903097 | 2  | 21,023,042  | 0.001081 | 0.376 | 0.344 |  |  |  | <i>C2orf43</i>    | TSS1500 |
| cg02320862 | 17 | 75,370,284  | 3.22E-17 | 0.376 | 0.307 |  |  |  | <i>SEPT9</i>      | 5'UTR   |
| cg09668344 | 11 | 77,122,506  | 8.45E-24 | 0.376 | 0.364 |  |  |  | <i>PAK1</i>       | 5'UTR   |
| cg03476673 | 16 | 84,870,203  | 4.01E-27 | 0.376 | 0.361 |  |  |  | <i>CRISPLD2</i>   | 5'UTR   |
| cg26777760 | X  | 132,092,564 | 0.033648 | 0.376 | 0.236 |  |  |  | <i>HS6ST2</i>     | Body    |
| cg20902783 | 14 | 21,494,071  | 4.08E-20 | 0.376 | 0.355 |  |  |  | <i>NDRG2</i>      | TSS1500 |
| cg21890726 | 15 | 68,260,574  | 0.023121 | 0.376 | 0.052 |  |  |  |                   |         |
| cg18005828 | 10 | 120,031,911 | 1.33E-09 | 0.376 | 0.318 |  |  |  |                   |         |
| cg16288089 | 7  | 97,361,408  | 9.07E-05 | 0.376 | 0.366 |  |  |  | <i>TAC1</i>       | 5'UTR   |
| cg00744866 | 3  | 33,701,209  | 1.68E-06 | 0.376 | 0.269 |  |  |  | <i>CLASP2</i>     | Body    |
| cg18435532 | 19 | 36,024,802  | 6.47E-07 | 0.376 | 0.336 |  |  |  | <i>GAPDHS</i>     | Body    |
| cg21773872 | 7  | 30,722,320  | 0.002715 | 0.376 | 0.523 |  |  |  | <i>CRHR2</i>      | TSS200  |
| cg18914211 | 6  | 29,795,815  | 4.25E-06 | 0.375 | 0.392 |  |  |  | <i>HLA-G</i>      | Body    |
| cg23497020 | 12 | 50,616,562  | 3.25E-17 | 0.375 | 0.361 |  |  |  | <i>LIMA1</i>      | Body    |
| cg20337996 | 12 | 124,780,809 | 1.79E-15 | 0.375 | 0.288 |  |  |  | <i>FAM101A</i>    | 5'UTR   |
| cg02590710 | X  | 56,258,440  | 4.08E-16 | 0.375 | 0.354 |  |  |  | <i>KLF8</i>       | TSS1500 |
| cg18653350 | 13 | 24,007,836  | 0.006922 | 0.375 | 0.274 |  |  |  | <i>SACS</i>       | 5'UTR   |
| cg09793609 | X  | 119,445,399 | 4.4E-15  | 0.375 | 0.343 |  |  |  | <i>FAM70A</i>     | TSS200  |
| cg01072076 | 5  | 1,930,801   | 0.014078 | 0.375 | 0.493 |  |  |  |                   |         |
| cg05347878 | 9  | 98,784,231  | 0.002839 | 0.375 | 0.273 |  |  |  | <i>NCRNA00092</i> | TSS200  |
| cg21963535 | 20 | 44,098,285  | 1.26E-05 | 0.375 | 0.260 |  |  |  | <i>WFDC2</i>      | TSS200  |
| cg19349369 | 6  | 2,842,146   | 8.99E-06 | 0.375 | 0.374 |  |  |  | <i>SERPINB1</i>   | TSS200  |

|            |    |             |          |       |       |          |       |  |                  |         |
|------------|----|-------------|----------|-------|-------|----------|-------|--|------------------|---------|
| cg23720384 | 21 | 23,747,055  | 9.43E-15 | 0.375 | 0.323 |          |       |  |                  |         |
| cg16937769 | 12 | 54,409,485  | 7.57E-06 | 0.375 | 0.372 |          |       |  | <i>HOXC4</i>     | TSS1500 |
| cg24647015 | 11 | 114,191,367 | 1.73E-14 | 0.375 | 0.358 |          |       |  |                  |         |
| cg09421111 | 16 | 57,673,122  | 2.5E-07  | 0.375 | 0.403 |          |       |  | <i>GPR56</i>     | 5'UTR   |
| cg20950465 | 1  | 53,068,181  | 9.28E-05 | 0.375 | 0.171 |          |       |  | <i>GPX7</i>      | 1stExon |
| cg10101773 | 14 | 75,894,136  | 7.68E-20 | 0.375 | 0.323 |          |       |  | <i>JDP2</i>      | TSS1500 |
| cg17034390 | 6  | 30,095,326  | 3.11E-13 | 0.375 | 0.356 |          |       |  |                  |         |
| cg03515663 | 7  | 157,478,510 | 5.53E-30 | 0.375 | 0.363 |          |       |  | <i>PTPRN2</i>    | Body    |
| cg05475524 | 11 | 66,326,798  | 6.27E-18 | 0.375 | 0.378 |          |       |  | <i>ACTN3</i>     | Body    |
| cg14772439 | 6  | 29,911,104  | 0.016157 | 0.375 | 0.175 |          |       |  | <i>HLA-A</i>     | Body    |
| cg22940848 | 1  | 2,222,486   | 1.14E-11 | 0.375 | 0.379 |          |       |  | <i>SKI</i>       | Body    |
| cg19356191 | 1  | 116,371,337 | 0.000724 | 0.375 | 0.378 |          |       |  |                  |         |
| cg05770238 | 1  | 26,686,587  | 1.08E-09 | 0.375 | 0.409 |          |       |  |                  |         |
| cg00613284 | 8  | 67,419,936  | 1.86E-25 | 0.375 | 0.383 |          |       |  | <i>C8orf46</i>   | Body    |
| cg12031863 | 16 | 4,587,854   | 3.42E-24 | 0.375 | 0.351 |          |       |  | <i>C16orf5</i>   | 5'UTR   |
| cg15673034 | 18 | 3,499,093   | 0.011084 | 0.375 | 0.257 |          |       |  | <i>DLGAP1</i>    | 3'UTR   |
| cg15375469 | 7  | 29,186,231  | 2.38E-05 | 0.375 | 0.343 |          |       |  | <i>CPVL</i>      | TSS200  |
| cg24879335 | 3  | 133,465,180 | 0.000136 | 0.375 | 0.276 |          |       |  | <i>TF</i>        | 5'UTR   |
| cg14121282 | 9  | 137,268,074 | 1.4E-24  | 0.375 | 0.365 |          |       |  | <i>RXRA</i>      | Body    |
| cg07541559 | 11 | 34,288,225  | 1.77E-26 | 0.374 | 0.353 |          |       |  | <i>ABTB2</i>     | Body    |
| cg24431872 | 4  | 11,429,036  | 2.6E-31  | 0.374 | 0.375 |          |       |  | <i>HS3ST1</i>    | 5'UTR   |
| cg03917666 | 10 | 3,977,608   | 2.95E-23 | 0.374 | 0.360 |          |       |  |                  |         |
| cg21286782 | 1  | 113,265,602 | 2.75E-59 | 0.374 | 0.368 |          |       |  | <i>FAM19A3</i>   | Body    |
| cg27496526 | 15 | 41,805,530  | 1.34E-10 | 0.374 | 0.358 |          |       |  | <i>LTK</i>       | Body    |
| cg01889574 | 11 | 44,590,889  | 1.03E-05 | 0.374 | 0.388 |          |       |  | <i>CD82</i>      | 5'UTR   |
| cg03051777 | 12 | 115,131,789 | 5.21E-10 | 0.374 | 0.425 |          |       |  |                  |         |
| cg08613144 | 2  | 133,428,836 | 1.96E-06 | 0.374 | 0.404 |          |       |  | <i>LYPD1</i>     | 1stExon |
| cg09180171 | 1  | 22,677,913  | 1.2E-05  | 0.374 | 0.336 |          |       |  |                  |         |
| cg05721365 | 17 | 62,777,693  | 0.00038  | 0.374 | 0.281 |          |       |  | <i>LOC146880</i> | Body    |
| cg18502142 | 7  | 96,622,709  | 4.91E-11 | 0.374 | 0.364 |          |       |  | <i>DLX6AS</i>    | Body    |
| cg05864326 | 2  | 177,030,150 | 0.003484 | 0.374 | 0.269 |          |       |  | <i>HOXD3</i>     | 5'UTR   |
| cg25974901 | 1  | 20,396,750  | 9.28E-47 | 0.374 | 0.388 |          |       |  | <i>PLA2G5</i>    | 1stExon |
| cg21079345 | 7  | 134,144,036 | 0.000325 | 0.374 | 0.227 |          |       |  | <i>AKR1B1</i>    | TSS200  |
| cg18056600 | 17 | 4,642,047   | 4.47E-10 | 0.374 | 0.225 | 3.89E-17 | 0.213 |  | <i>ZMYND15</i>   | TSS1500 |

|            |    |             |          |       |       |          |       |  |                   |         |
|------------|----|-------------|----------|-------|-------|----------|-------|--|-------------------|---------|
| cg22635676 | 2  | 241,975,971 | 4.57E-10 | 0.374 | 0.357 |          |       |  | <i>SNED1</i>      | Body    |
| cg25831075 | 3  | 164,915,196 | 0.001698 | 0.374 | 0.240 |          |       |  | <i>SLITRK3</i>    | TSS1500 |
| cg18383538 | 6  | 28,557,823  | 6.27E-08 | 0.374 | 0.389 |          |       |  |                   |         |
| cg20415170 | 5  | 95,298,066  | 0.024825 | 0.374 | 0.237 |          |       |  | <i>ELL2</i>       | TSS1500 |
| cg21554552 | 3  | 50,378,425  | 7.62E-13 | 0.374 | 0.378 | 7.8E-11  | 0.165 |  | <i>RASSF1</i>     | TSS200  |
| cg15717183 | 3  | 181,438,122 | 1.4E-20  | 0.374 | 0.372 |          |       |  | <i>SOX20T</i>     | Body    |
| cg21042456 | 7  | 1,270,558   | 2.91E-06 | 0.374 | 0.354 |          |       |  |                   |         |
| cg04909938 | 4  | 6,676,273   | 8.01E-09 | 0.374 | 0.379 |          |       |  | <i>LOC93622</i>   | Body    |
| cg00158308 | 13 | 97,646,341  | 7.53E-05 | 0.374 | 0.368 | 1.85E-24 | 0.252 |  | <i>OXGR1</i>      | 5'UTR   |
| cg17932631 | 2  | 96,990,861  | 9.83E-16 | 0.374 | 0.323 |          |       |  | <i>ITPRIPL1</i>   | TSS1500 |
| cg06488957 | 17 | 17,628,152  | 1.23E-66 | 0.374 | 0.388 |          |       |  | <i>RAI1</i>       | 5'UTR   |
| cg16695890 | 19 | 15,580,310  | 2.31E-13 | 0.374 | 0.362 |          |       |  | <i>PGLYRP2</i>    | Body    |
| cg22869726 | 21 | 34,398,265  | 3.29E-09 | 0.374 | 0.391 |          |       |  | <i>OLIG2</i>      | 1stExon |
| cg11044163 | 7  | 29,186,153  | 0.00587  | 0.374 | 0.367 | 2.22E-10 | 0.163 |  | <i>CPVL</i>       | TSS200  |
| cg07904073 | 10 | 74,017,122  | 7.82E-17 | 0.374 | 0.379 |          |       |  |                   |         |
| cg05476483 | 11 | 76,750,693  | 4.76E-17 | 0.374 | 0.367 |          |       |  | <i>B3GNT6</i>     | Body    |
| cg21686812 | 6  | 168,078,911 | 1.21E-07 | 0.374 | 0.297 |          |       |  |                   |         |
| cg00808305 | 1  | 7,434,171   | 2.5E-06  | 0.374 | 0.312 |          |       |  | <i>CAMTA1</i>     | Body    |
| cg03248158 | 4  | 122,632,918 | 7.1E-06  | 0.374 | 0.346 |          |       |  |                   |         |
| cg03126561 | 11 | 12,434,050  | 9.76E-17 | 0.373 | 0.360 |          |       |  | <i>PARVA</i>      | Body    |
| cg10087036 | 16 | 19,130,461  | 2.05E-12 | 0.373 | 0.369 |          |       |  | <i>ITPRIPL2</i>   | 1stExon |
| cg15575433 | 7  | 100,488,705 | 5.76E-05 | 0.373 | 0.396 |          |       |  | <i>UFSP1</i>      | TSS1500 |
| cg17231524 | X  | 134,556,505 | 6.41E-18 | 0.373 | 0.319 | 2.07E-32 | 0.333 |  | <i>NCRNA00086</i> | Body    |
| cg27117792 | 12 | 102,330,180 | 1.21E-11 | 0.373 | 0.386 |          |       |  |                   |         |
| cg10249375 | 1  | 63,795,934  | 0.004754 | 0.373 | 0.388 |          |       |  |                   |         |
| cg05986933 | 2  | 43,020,457  | 8.25E-15 | 0.373 | 0.333 |          |       |  | <i>HAAO</i>       | TSS1500 |
| cg18344652 | 1  | 95,393,096  | 0.009585 | 0.373 | 0.149 |          |       |  | <i>CNN3</i>       | TSS1500 |
| cg25054907 | 17 | 61,553,954  | 2.31E-22 | 0.373 | 0.325 |          |       |  | <i>ACE</i>        | TSS1500 |
| cg10790698 | 19 | 18,539,756  | 0.000243 | 0.373 | 0.241 |          |       |  | <i>SSBP4</i>      | Body    |
| cg11178148 | 11 | 116,371,781 | 1.38E-16 | 0.373 | 0.359 |          |       |  |                   |         |
| cg15963417 | 12 | 103,311,300 | 0.000816 | 0.373 | 0.182 | 5.87E-14 | 0.210 |  | <i>PAH</i>        | 5'UTR   |
| cg22389730 | 1  | 161,697,241 | 0.00542  | 0.373 | 0.363 |          |       |  | <i>FCRLB</i>      | Body    |
| cg22122174 | 6  | 44,187,055  | 0.004182 | 0.373 | 0.279 |          |       |  | <i>SLC29A1</i>    | TSS200  |
| cg06025456 | 6  | 32,120,863  | 1.58E-07 | 0.373 | 0.365 |          |       |  | <i>PPT2</i>       | TSS1500 |

|            |    |             |          |       |       |  |  |  |                  |         |
|------------|----|-------------|----------|-------|-------|--|--|--|------------------|---------|
| cg04153784 | 7  | 127,672,235 | 8.74E-05 | 0.373 | 0.256 |  |  |  | <i>SND1</i>      | Body    |
| cg09944213 | 16 | 5,037,570   | 1.32E-07 | 0.373 | 0.375 |  |  |  | <i>SEC14L5</i>   | Body    |
| cg11828180 | 1  | 41,848,985  | 8.91E-05 | 0.373 | 0.285 |  |  |  |                  |         |
| cg13546935 | 2  | 29,033,780  | 0.010708 | 0.373 | 0.199 |  |  |  | <i>SPDYA</i>     | 5'UTR   |
| cg26870725 | 19 | 12,978,805  | 2.1E-08  | 0.373 | 0.329 |  |  |  | <i>MAST1</i>     | Body    |
| cg12630714 | 4  | 54,975,894  | 1.96E-15 | 0.373 | 0.372 |  |  |  |                  |         |
| cg27326642 | 6  | 26,189,001  | 0.016693 | 0.373 | 0.336 |  |  |  | <i>HIST1H4D</i>  | 1stExon |
| cg17227967 | 20 | 9,496,556   | 9.1E-07  | 0.373 | 0.322 |  |  |  | <i>C20orf103</i> | Body    |
| cg07858113 | 6  | 30,711,561  | 4.07E-22 | 0.373 | 0.371 |  |  |  | <i>IER3</i>      | 3'UTR   |
| cg01250960 | 16 | 85,783,863  | 1.91E-19 | 0.373 | 0.324 |  |  |  | <i>C16orf74</i>  | 5'UTR   |
| cg06922635 | 4  | 57,371,607  | 9.04E-06 | 0.373 | 0.370 |  |  |  | <i>ARL9</i>      | 5'UTR   |
| cg02896496 | X  | 54,385,394  | 4.35E-13 | 0.373 | 0.366 |  |  |  | <i>WNK3</i>      | TSS1500 |
| cg08787251 | 7  | 27,281,964  | 5.71E-14 | 0.372 | 0.300 |  |  |  | <i>EVX1</i>      | TSS200  |
| cg10916998 | 6  | 30,711,832  | 0.000424 | 0.372 | 0.362 |  |  |  | <i>FLOT1</i>     | TSS1500 |
| cg17696629 | 8  | 94,713,190  | 0.000442 | 0.372 | 0.292 |  |  |  | <i>FAM92A1</i>   | Body    |
| cg03428864 | 3  | 25,469,925  | 1.7E-25  | 0.372 | 0.365 |  |  |  | <i>RARB</i>      | 5'UTR   |
| cg03923561 | 12 | 54,447,220  | 2.76E-14 | 0.372 | 0.370 |  |  |  | <i>HOXC4</i>     | 5'UTR   |
| cg12768523 | 4  | 169,737,224 | 1.82E-17 | 0.372 | 0.347 |  |  |  | <i>PALLD</i>     | Body    |
| cg05393297 | 12 | 53,359,155  | 1.48E-28 | 0.372 | 0.386 |  |  |  |                  |         |
| cg12420900 | 10 | 123,922,863 | 3.49E-15 | 0.372 | 0.361 |  |  |  | <i>TACC2</i>     | TSS1500 |
| cg17001034 | 1  | 55,008,516  | 4.49E-16 | 0.372 | 0.304 |  |  |  |                  |         |
| cg23489434 | 12 | 54,500,175  | 9.16E-12 | 0.372 | 0.282 |  |  |  | <i>FLJ12825</i>  | Body    |
| cg26061177 | 3  | 64,670,562  | 2.85E-06 | 0.372 | 0.290 |  |  |  | <i>ADAMTS9</i>   | Body    |
| cg17029019 | 17 | 1,959,124   | 0.000593 | 0.372 | 0.268 |  |  |  | <i>HIC1</i>      | TSS1500 |
| cg26213453 | 15 | 89,455,860  | 1.81E-06 | 0.372 | 0.327 |  |  |  | <i>MFG8</i>      | Body    |
| cg09308026 | 16 | 30,041,884  | 5.74E-06 | 0.372 | 0.395 |  |  |  | <i>FAM57B</i>    | 5'UTR   |
| cg02099543 | 22 | 45,899,186  | 0.000371 | 0.372 | 0.330 |  |  |  | <i>FBLN1</i>     | Body    |
| cg24346905 | 1  | 108,023,249 | 1.36E-10 | 0.372 | 0.333 |  |  |  | <i>NTNG1</i>     | Body    |
| cg26638444 | 5  | 150,400,180 | 6.38E-05 | 0.372 | 0.211 |  |  |  | <i>GPX3</i>      | 5'UTR   |
| cg15835396 | 7  | 128,809,228 | 0.000154 | 0.372 | 0.350 |  |  |  |                  |         |
| cg26158897 | 15 | 53,083,135  | 1.01E-12 | 0.372 | 0.338 |  |  |  | <i>ONECUT1</i>   | TSS1500 |
| cg24569637 | 2  | 201,450,560 | 0.00582  | 0.372 | 0.359 |  |  |  | <i>AOX1</i>      | TSS200  |
| cg20383155 | 6  | 31,831,428  | 8.68E-09 | 0.372 | 0.339 |  |  |  | <i>NEU1</i>      | TSS1500 |
| cg05192452 | 5  | 71,852,759  | 0.003254 | 0.372 | 0.251 |  |  |  |                  |         |

|            |    |             |          |       |       |          |       |  |                     |         |
|------------|----|-------------|----------|-------|-------|----------|-------|--|---------------------|---------|
| cg06126713 | 7  | 16,505,617  | 7E-07    | 0.372 | 0.374 |          |       |  | <i>SOSTDC1</i>      | TSS200  |
| cg25123632 | 6  | 29,975,154  | 2.19E-14 | 0.372 | 0.356 |          |       |  | <i>HLA-J</i>        | Body    |
| cg20293594 | 7  | 27,196,296  | 2.69E-05 | 0.372 | 0.333 |          |       |  | <i>HOXA7</i>        | TSS200  |
| cg21111256 | 19 | 41,386,507  | 1.29E-14 | 0.372 | 0.325 |          |       |  | <i>CYP2A7</i>       | Body    |
| cg09644722 | 17 | 60,885,519  | 2.04E-11 | 0.372 | 0.335 | 2.85E-27 | 0.262 |  | <i>MARCH10</i>      | 5'UTR   |
| cg09784335 | 4  | 41,875,193  | 1.76E-08 | 0.372 | 0.380 |          |       |  |                     |         |
| cg00515457 | 19 | 35,396,203  | 7.09E-06 | 0.372 | 0.343 |          |       |  |                     |         |
| cg21362478 | 9  | 78,507,352  | 0.000245 | 0.372 | 0.365 |          |       |  | <i>PCSK5</i>        | Body    |
| cg13129612 | 14 | 24,505,547  | 3.96E-23 | 0.372 | 0.364 |          |       |  | <i>DHRS4L1</i>      | TSS200  |
| cg20743134 | 3  | 69,061,356  | 6.47E-17 | 0.371 | 0.363 |          |       |  | <i>C3orf64</i>      | 5'UTR   |
| cg07068756 | 4  | 41,258,910  | 7.14E-06 | 0.371 | 0.362 |          |       |  | <i>UCHL1</i>        | 1stExon |
| cg25456593 | 11 | 70,672,858  | 1.19E-39 | 0.371 | 0.354 |          |       |  | <i>SHANK2</i>       | Body    |
| cg23882862 | 11 | 111,169,795 | 0.00047  | 0.371 | 0.393 |          |       |  | <i>C11orf92</i>     | 5'UTR   |
| cg25023596 | 12 | 118,627,943 | 1.13E-21 | 0.371 | 0.379 |          |       |  | <i>TAOK3</i>        | Body    |
| cg19759135 | 5  | 179,221,059 | 1.09E-72 | 0.371 | 0.360 |          |       |  | <i>LTC4S</i>        | 1stExon |
| cg22282405 | 6  | 50,810,682  | 3.97E-10 | 0.371 | 0.380 |          |       |  | <i>TFAP2B</i>       | Body    |
| cg05635169 | 5  | 113,589,213 | 8.22E-30 | 0.371 | 0.336 |          |       |  |                     |         |
| cg17670641 | X  | 49,023,115  | 1.49E-08 | 0.371 | 0.303 |          |       |  | <i>MAGIX</i>        | 3'UTR   |
| cg05068206 | 6  | 30,095,195  | 9.44E-18 | 0.371 | 0.356 |          |       |  |                     |         |
| cg17693420 | 7  | 99,157,059  | 0.012905 | 0.371 | 0.302 |          |       |  | <i>ZNF655</i>       | 5'UTR   |
| cg00474080 | 6  | 30,923,243  | 0.000687 | 0.371 | 0.427 |          |       |  |                     |         |
| cg10715272 | 1  | 39,981,410  | 7E-21    | 0.371 | 0.390 |          |       |  | <i>BMP8A</i>        | Body    |
| cg03432338 | 1  | 231,176,985 | 0.008191 | 0.371 | 0.328 |          |       |  | <i>FAM89A</i>       | TSS1500 |
| cg21858255 | 12 | 104,609,609 | 2.93E-05 | 0.371 | 0.368 |          |       |  | <i>TXNRD1</i>       | 1stExon |
| cg08276645 | 2  | 241,459,502 | 4.02E-19 | 0.371 | 0.351 |          |       |  | <i>ANKMY1</i>       | Body    |
| cg00922748 | 12 | 2,944,322   | 0.00098  | 0.371 | 0.218 |          |       |  | <i>NRIP2</i>        | TSS200  |
| cg26022183 | 1  | 156,215,655 | 0.016491 | 0.371 | 0.293 |          |       |  | <i>PAQR6</i>        | 5'UTR   |
| cg27633530 | 7  | 50,344,294  | 9.35E-12 | 0.371 | 0.369 |          |       |  | <i>IKZF1</i>        | TSS200  |
| cg14588642 | 11 | 67,139,423  | 1.66E-23 | 0.371 | 0.395 |          |       |  | <i>LOC100130987</i> | Body    |
| cg18177414 | 7  | 149,389,929 | 0.006937 | 0.371 | 0.414 |          |       |  |                     |         |
| cg02228815 | 15 | 31,685,131  | 1.46E-39 | 0.371 | 0.338 |          |       |  |                     |         |
| cg09448677 | 11 | 70,672,740  | 2.62E-37 | 0.371 | 0.362 |          |       |  | <i>SHANK2</i>       | Body    |
| cg17841765 | 1  | 22,560,699  | 2.63E-11 | 0.371 | 0.374 |          |       |  |                     |         |
| cg14118515 | 2  | 176,948,728 | 0.038547 | 0.371 | 0.394 |          |       |  | <i>EVX2</i>         | TSS200  |



|            |    |             |          |       |       |  |  |  |                  |         |
|------------|----|-------------|----------|-------|-------|--|--|--|------------------|---------|
| cg14820415 | 2  | 6,121,680   | 3.11E-05 | 0.371 | 0.340 |  |  |  | <i>LOC400940</i> | TSS1500 |
| cg16867584 | 19 | 49,200,180  | 1.54E-06 | 0.371 | 0.388 |  |  |  | <i>FUT2</i>      | 5'UTR   |
| cg24182521 | 20 | 44,541,013  | 7.64E-10 | 0.371 | 0.354 |  |  |  | <i>PLTP</i>      | TSS1500 |
| cg14135025 | 5  | 55,776,721  | 0.020974 | 0.370 | 0.106 |  |  |  |                  |         |
| cg19214408 | 10 | 111,981,687 | 1.2E-08  | 0.370 | 0.350 |  |  |  | <i>MXI1</i>      | Body    |
| cg03207574 | 10 | 25,241,260  | 0.000445 | 0.370 | 0.385 |  |  |  | <i>PRTFDC1</i>   | Body    |
| cg10572943 | 21 | 34,775,045  | 0.004329 | 0.370 | 0.215 |  |  |  | <i>IFNGR2</i>    | TSS200  |
| cg19887700 | 12 | 115,136,200 | 2.63E-17 | 0.370 | 0.351 |  |  |  |                  |         |
| cg23511118 | 3  | 67,840,535  | 1.29E-09 | 0.370 | 0.406 |  |  |  |                  |         |
| cg10696085 | 12 | 50,444,522  | 3.11E-10 | 0.370 | 0.372 |  |  |  |                  |         |
| cg19186145 | 2  | 45,169,562  | 1.68E-06 | 0.370 | 0.350 |  |  |  | <i>SIX3</i>      | 1stExon |
| cg10992014 | 6  | 121,758,817 | 2.8E-07  | 0.370 | 0.374 |  |  |  | <i>GJA1</i>      | 5'UTR   |
| cg01559356 | 19 | 2,282,568   | 4.75E-13 | 0.370 | 0.354 |  |  |  | <i>C19orf35</i>  | TSS1500 |
| cg19981568 | 14 | 60,977,300  | 5.73E-05 | 0.370 | 0.333 |  |  |  | <i>SIX6</i>      | Body    |
| cg01292793 | 7  | 73,002,385  | 2.03E-17 | 0.370 | 0.325 |  |  |  |                  |         |
| cg17255450 | 4  | 5,710,372   | 0.000424 | 0.370 | 0.299 |  |  |  | <i>EVC2</i>      | 5'UTR   |
| cg27616227 | 8  | 108,510,314 | 1.53E-11 | 0.370 | 0.371 |  |  |  | <i>ANGPT1</i>    | TSS200  |
| cg26145959 | 6  | 44,310,257  | 3.3E-13  | 0.370 | 0.373 |  |  |  | <i>SPATS1</i>    | TSS200  |
| cg18740893 | 3  | 136,538,934 | 0.012114 | 0.370 | 0.193 |  |  |  | <i>TMEM22</i>    | 5'UTR   |
| cg23152641 | 7  | 127,809,009 | 1.77E-05 | 0.370 | 0.359 |  |  |  |                  |         |
| cg11942956 | 6  | 133,562,470 | 0.000006 | 0.370 | 0.426 |  |  |  | <i>EYA4</i>      | TSS200  |
| cg03568858 | 7  | 100,465,221 | 7.56E-27 | 0.370 | 0.347 |  |  |  | <i>TRIP6</i>     | 1stExon |
| cg20157753 | 2  | 113,594,343 | 2.32E-09 | 0.370 | 0.402 |  |  |  | <i>IL1B</i>      | 1stExon |
| cg18049167 | 6  | 32,121,261  | 3.39E-10 | 0.370 | 0.357 |  |  |  | <i>PPT2</i>      | TSS200  |
| cg19820372 | 11 | 111,411,216 | 4.61E-12 | 0.370 | 0.298 |  |  |  | <i>LAYN</i>      | TSS200  |
| cg02077027 | X  | 19,817,931  | 0.001363 | 0.370 | 0.360 |  |  |  | <i>SH3KBP1</i>   | Body    |
| cg17727989 | 9  | 27,529,519  | 0.000871 | 0.370 | 0.167 |  |  |  | <i>MOBKL2B</i>   | 5'UTR   |
| cg23194719 | 10 | 52,177,823  | 7.76E-07 | 0.370 | 0.378 |  |  |  | <i>SGMS1</i>     | 5'UTR   |
| cg20840795 | 12 | 120,242,394 | 1.86E-21 | 0.370 | 0.362 |  |  |  | <i>CIT</i>       | Body    |
| cg25104124 | 10 | 74,021,022  | 4.91E-08 | 0.370 | 0.349 |  |  |  |                  |         |
| cg21982950 | 5  | 1,876,200   | 8.51E-21 | 0.370 | 0.361 |  |  |  |                  |         |
| cg21879102 | 12 | 120,241,409 | 9.36E-19 | 0.370 | 0.356 |  |  |  | <i>CIT</i>       | Body    |
| cg10848272 | 14 | 70,653,719  | 3.05E-44 | 0.370 | 0.360 |  |  |  | <i>SLC8A3</i>    | 5'UTR   |
| cg14753356 | 6  | 30,720,108  | 1.72E-11 | 0.370 | 0.276 |  |  |  |                  |         |

|            |    |             |          |       |       |  |  |  |                |         |
|------------|----|-------------|----------|-------|-------|--|--|--|----------------|---------|
| cg26968962 | 16 | 87,418,097  | 8.15E-12 | 0.370 | 0.316 |  |  |  | <i>FBXO31</i>  | TSS1500 |
| cg13273147 | X  | 153,192,582 | 0.000358 | 0.370 | 0.326 |  |  |  | <i>ARHGAP4</i> | TSS1500 |
| cg09881545 | 3  | 5,137,630   | 2.46E-15 | 0.370 | 0.375 |  |  |  |                |         |
| cg07569918 | 1  | 212,002,970 | 5.09E-37 | 0.370 | 0.362 |  |  |  | <i>LPGAT1</i>  | 5'UTR   |
| cg07641160 | 6  | 117,086,850 | 0.007392 | 0.370 | 0.277 |  |  |  | <i>FAM162B</i> | 1stExon |
| cg02245794 | 8  | 38,585,881  | 2.15E-08 | 0.369 | 0.337 |  |  |  | <i>TACC1</i>   | 1stExon |
| cg02337836 | 1  | 110,210,641 | 5.18E-09 | 0.369 | 0.365 |  |  |  | <i>GSTM2</i>   | TSS200  |
| cg06217769 | 17 | 2,126,306   | 3.82E-15 | 0.369 | 0.359 |  |  |  | <i>SMG6</i>    | Body    |
| cg24954684 | 12 | 122,907,641 | 2.11E-19 | 0.369 | 0.318 |  |  |  | <i>CLIP1</i>   | TSS1500 |
| cg26647332 | 10 | 31,073,467  | 0.000452 | 0.369 | 0.217 |  |  |  |                |         |
| cg06635952 | 2  | 70,025,869  | 2.08E-23 | 0.369 | 0.359 |  |  |  | <i>ANXA4</i>   | Body    |
| cg25203962 | 3  | 170,746,291 | 4.51E-11 | 0.369 | 0.349 |  |  |  |                |         |
| cg17812788 | 17 | 40,333,009  | 0.001546 | 0.369 | 0.278 |  |  |  | <i>KCNH4</i>   | 1stExon |
| cg13997668 | 10 | 73,847,532  | 2.44E-06 | 0.369 | 0.377 |  |  |  | <i>SPOCK2</i>  | Body    |
| cg08217285 | 17 | 27,917,879  | 1.2E-19  | 0.369 | 0.360 |  |  |  | <i>GIT1</i>    | TSS1500 |
| cg09092054 | 22 | 19,511,987  | 0.005047 | 0.369 | 0.392 |  |  |  | <i>CLDN5</i>   | 1stExon |
| cg11641791 | 17 | 38,821,429  | 0.004402 | 0.369 | 0.347 |  |  |  | <i>KRT222</i>  | TSS200  |
| cg27533119 | 7  | 124,404,472 | 1.01E-09 | 0.369 | 0.286 |  |  |  | <i>GPR37</i>   | 1stExon |
| cg22498143 | 19 | 40,993,991  | 2.56E-05 | 0.369 | 0.290 |  |  |  | <i>SPTBN4</i>  | Body    |
| cg10976772 | 1  | 6,390,595   | 4.58E-15 | 0.369 | 0.349 |  |  |  | <i>ACOT7</i>   | Body    |
| cg08952506 | 2  | 201,450,610 | 7.39E-08 | 0.369 | 0.325 |  |  |  | <i>AOX1</i>    | TSS200  |
| cg02006615 | 7  | 157,485,230 | 9.22E-21 | 0.369 | 0.361 |  |  |  | <i>PTPRN2</i>  | Body    |
| cg04305621 | 17 | 73,084,263  | 1.49E-44 | 0.369 | 0.356 |  |  |  | <i>SLC16A5</i> | 5'UTR   |
| cg22795891 | 2  | 192,543,908 | 0.001087 | 0.369 | 0.216 |  |  |  | <i>OBFC2A</i>  | Body    |
| cg11207763 | 11 | 69,517,471  | 1.41E-10 | 0.369 | 0.394 |  |  |  | <i>FGF19</i>   | Body    |
| cg00082219 | 2  | 219,846,299 | 1.01E-58 | 0.369 | 0.371 |  |  |  | <i>FEV</i>     | 3'UTR   |
| cg00017062 | 15 | 70,669,548  | 6.55E-11 | 0.369 | 0.363 |  |  |  |                |         |
| cg07121644 | 11 | 46,383,031  | 1.64E-38 | 0.369 | 0.359 |  |  |  | <i>DGKZ</i>    | Body    |
| cg14270292 | 6  | 133,562,494 | 3.13E-06 | 0.369 | 0.446 |  |  |  | <i>EYA4</i>    | 5'UTR   |
| cg26480862 | 22 | 28,839,667  | 1.54E-09 | 0.369 | 0.323 |  |  |  | <i>TTC28</i>   | Body    |
| cg20752903 | 17 | 60,885,671  | 0.000344 | 0.369 | 0.321 |  |  |  | <i>MARCH10</i> | 5'UTR   |
| cg10824705 | 2  | 149,645,724 | 4.19E-10 | 0.369 | 0.380 |  |  |  | <i>KIF5C</i>   | Body    |
| cg14957718 | 3  | 50,243,260  | 1.2E-22  | 0.369 | 0.337 |  |  |  | <i>SLC38A3</i> | 5'UTR   |
| cg15012484 | 6  | 3,232,246   | 0.021714 | 0.369 | 0.213 |  |  |  |                |         |

|            |    |             |          |       |       |         |       |  |                  |         |
|------------|----|-------------|----------|-------|-------|---------|-------|--|------------------|---------|
| cg05783185 | 8  | 119,121,281 | 3.25E-08 | 0.369 | 0.415 |         |       |  | <i>EXT1</i>      | Body    |
| cg09428251 | 8  | 68,658,408  | 6.82E-10 | 0.369 | 0.372 |         |       |  | <i>CPA6</i>      | 1stExon |
| cg10758286 | 1  | 15,481,367  | 2.61E-20 | 0.369 | 0.301 |         |       |  | <i>TMEM51</i>    | 5'UTR   |
| cg01528052 | 6  | 30,095,728  | 5.89E-06 | 0.368 | 0.469 |         |       |  |                  |         |
| cg25003777 | 6  | 2,841,626   | 3.94E-08 | 0.368 | 0.309 |         |       |  | <i>SERPINB1</i>  | 5'UTR   |
| cg01176363 | 20 | 62,369,445  | 0.005713 | 0.368 | 0.371 |         |       |  | <i>LIME1</i>     | Body    |
| cg00063471 | 15 | 51,385,970  | 0.001067 | 0.368 | 0.411 |         |       |  | <i>TNFAIP8L3</i> | Body    |
| cg00730887 | 4  | 160,149,604 | 2.4E-25  | 0.368 | 0.354 |         |       |  |                  |         |
| cg15198729 | X  | 100,446,496 | 6.94E-12 | 0.368 | 0.361 |         |       |  |                  |         |
| cg04006323 | 4  | 185,937,730 | 0.000001 | 0.368 | 0.362 |         |       |  |                  |         |
| cg18573327 | 12 | 115,123,875 | 4.59E-15 | 0.368 | 0.320 |         |       |  |                  |         |
| cg17180237 | 1  | 119,545,275 | 2.89E-11 | 0.368 | 0.311 |         |       |  |                  |         |
| cg02259324 | 15 | 78,111,196  | 0.000217 | 0.368 | 0.308 |         |       |  |                  |         |
| cg01814191 | 12 | 89,744,524  | 1.05E-15 | 0.368 | 0.332 |         |       |  | <i>DUSP6</i>     | Body    |
| cg21950525 | 7  | 99,155,767  | 0.002224 | 0.368 | 0.281 |         |       |  | <i>ZNF655</i>    | TSS1500 |
| cg07486895 | 18 | 59,560,433  | 7.2E-10  | 0.368 | 0.288 |         |       |  | <i>RNF152</i>    | TSS200  |
| cg18617005 | 5  | 140,787,504 | 0.007575 | 0.368 | 0.489 |         |       |  | <i>PCDHGA4</i>   | Body    |
| cg13372456 | 5  | 153,569,246 | 0.031645 | 0.368 | 0.169 |         |       |  | <i>GALNT10</i>   | TSS1500 |
| cg01244877 | X  | 153,598,902 | 4.13E-07 | 0.368 | 0.217 |         |       |  | <i>FLNA</i>      | Body    |
| cg01985965 | 1  | 2,461,278   | 3.83E-14 | 0.368 | 0.350 |         |       |  | <i>HES5</i>      | Body    |
| cg07817783 | 5  | 10,761,669  | 0.011518 | 0.368 | 0.171 | 1.6E-11 | 0.116 |  | <i>DAP</i>       | TSS1500 |
| cg20583316 | 7  | 100,770,476 | 1.01E-05 | 0.368 | 0.372 |         |       |  | <i>SERPINE1</i>  | 5'UTR   |
| cg01240444 | 12 | 124,247,047 | 0.001125 | 0.368 | 0.130 |         |       |  | <i>DNAH10</i>    | 1stExon |
| cg06132028 | 6  | 133,562,466 | 2.23E-07 | 0.368 | 0.426 |         |       |  | <i>EYA4</i>      | TSS200  |
| cg24500959 | 10 | 99,474,813  | 2.12E-14 | 0.368 | 0.316 |         |       |  | <i>MARVELD1</i>  | Body    |
| cg09155145 | 5  | 1,875,188   | 2.19E-17 | 0.368 | 0.356 |         |       |  |                  |         |
| cg09971314 | 6  | 28,415,023  | 4.45E-05 | 0.368 | 0.310 |         |       |  |                  |         |
| cg21730858 | 6  | 138,806,320 | 6.4E-11  | 0.368 | 0.293 |         |       |  | <i>NHSL1</i>     | Body    |
| cg14657277 | 2  | 123,419,093 | 6.39E-35 | 0.368 | 0.370 |         |       |  |                  |         |
| cg06616051 | X  | 153,094,332 | 6.19E-26 | 0.368 | 0.362 |         |       |  | <i>PDZD4</i>     | Body    |
| cg12200124 | 5  | 179,220,820 | 1.42E-38 | 0.368 | 0.360 |         |       |  | <i>LTC4S</i>     | TSS200  |
| cg06732395 | 5  | 180,018,722 | 3.75E-33 | 0.368 | 0.351 |         |       |  | <i>SCGB3A1</i>   | TSS1500 |
| cg11537946 | 4  | 139,773,369 | 1.14E-08 | 0.368 | 0.339 |         |       |  |                  |         |
| cg14913111 | 1  | 45,792,733  | 0.000143 | 0.368 | 0.347 |         |       |  | <i>HPDL</i>      | 1stExon |

|            |    |             |          |       |       |          |       |     |                 |         |
|------------|----|-------------|----------|-------|-------|----------|-------|-----|-----------------|---------|
| cg25423416 | 22 | 46,934,860  | 1.07E-13 | 0.367 | 0.335 |          |       |     |                 |         |
| cg18233416 | 5  | 141,705,411 | 0.005671 | 0.367 | 0.213 |          |       |     | <i>SPRY4</i>    | TSS1500 |
| cg06918474 | 5  | 126,205,081 | 1.46E-24 | 0.367 | 0.361 |          |       |     | <i>MARCH3</i>   | 3'UTR   |
| cg26683398 | 5  | 179,220,589 | 2.45E-33 | 0.367 | 0.350 |          |       |     | <i>LTC4S</i>    | TSS1500 |
| cg09363735 | 6  | 50,808,699  | 5.83E-11 | 0.367 | 0.391 |          |       |     | <i>TFAP2B</i>   | Body    |
| cg27188703 | 12 | 50,297,581  | 1.12E-07 | 0.367 | 0.259 | 1.27E-21 | 0.245 |     | <i>FAIM2</i>    | 1stExon |
| cg07935264 | 2  | 113,594,375 | 9.2E-12  | 0.367 | 0.348 | 3.82E-24 | 0.172 |     | <i>IL1B</i>     | TSS200  |
| cg01462545 | 4  | 42,401,242  | 5.81E-05 | 0.367 | 0.362 |          |       |     | <i>SHISA3</i>   | Body    |
| cg08848711 | X  | 118,827,659 | 0.006697 | 0.367 | 0.231 |          |       |     | <i>SEPT6</i>    | TSS1500 |
| cg14599729 | 17 | 15,686,294  | 0.005775 | 0.367 | 0.243 |          |       |     |                 |         |
| cg15125338 | 17 | 44,899,394  | 1.09E-16 | 0.367 | 0.358 |          |       |     |                 |         |
| cg15817960 | 12 | 54,409,599  | 2.88E-06 | 0.367 | 0.296 |          |       |     | <i>HOXC4</i>    | TSS1500 |
| cg12403148 | X  | 154,842,718 | 5.9E-07  | 0.367 | 0.310 |          |       |     | <i>TMLHE</i>    | TSS200  |
| cg22653140 | 10 | 81,214,225  | 1.56E-09 | 0.367 | 0.356 |          |       |     |                 |         |
| cg00076195 | 5  | 140,892,677 | 1.03E-08 | 0.367 | 0.260 |          |       |     |                 |         |
| cg06080793 | 6  | 1,625,457   | 1.42E-26 | 0.367 | 0.338 |          |       |     | <i>GMDS</i>     | Body    |
| cg06710082 | 6  | 29,943,408  | 5.28E-08 | 0.367 | 0.359 |          |       |     | <i>HCG9</i>     | Body    |
| cg13077262 | 6  | 44,310,350  | 3.2E-31  | 0.367 | 0.354 |          |       |     | <i>SPATS1</i>   | TSS200  |
| cg24304789 | 2  | 43,451,423  | 0.000742 | 0.367 | 0.309 |          |       |     | <i>ZFP36L2</i>  | 3'UTR   |
| cg16993043 | 1  | 200,008,026 | 1.56E-16 | 0.367 | 0.385 |          |       |     | <i>NR5A2</i>    | Body    |
| cg07400877 | 20 | 45,440,085  | 6.94E-07 | 0.367 | 0.319 |          |       |     |                 |         |
| cg00397324 | 21 | 42,798,594  | 0.005198 | 0.367 | 0.378 |          |       |     | <i>MX1</i>      | 5'UTR   |
| cg24784416 | 4  | 169,525,923 | 0.001146 | 0.367 | 0.267 |          |       | Yes | <i>PALLD</i>    | Body    |
| cg07243941 | 4  | 47,840,162  | 0.005843 | 0.367 | 0.356 |          |       |     | <i>CORIN</i>    | TSS200  |
| cg15119221 | 17 | 19,290,755  | 1.55E-30 | 0.367 | 0.368 |          |       |     | <i>MFAP4</i>    | TSS1500 |
| cg02231066 | 3  | 52,567,130  | 0.045014 | 0.367 | 0.143 |          |       |     | <i>NT5DC2</i>   | Body    |
| cg01470551 | 13 | 95,620,874  | 1.53E-06 | 0.367 | 0.352 |          |       |     |                 |         |
| cg16409339 | 1  | 146,556,239 | 1.6E-08  | 0.367 | 0.348 |          |       |     |                 |         |
| cg18697991 | 3  | 64,823,081  | 1.75E-22 | 0.367 | 0.354 |          |       |     | <i>MIR548A2</i> | Body    |
| cg20059012 | 12 | 53,613,154  | 2.26E-06 | 0.367 | 0.386 |          |       |     | <i>RARG</i>     | Body    |
| cg25153755 | X  | 47,433,716  | 0.000466 | 0.367 | 0.372 |          |       |     | <i>SYN1</i>     | Body    |
| cg18945842 | 22 | 42,306,589  | 0.017512 | 0.367 | 0.334 |          |       |     |                 |         |
| cg20686234 | 17 | 26,699,485  | 0.000943 | 0.367 | 0.242 |          |       |     | <i>SARM1</i>    | 1stExon |
| cg25594119 | 18 | 11,947,571  | 0.00012  | 0.367 | 0.345 |          |       |     |                 |         |

|            |    |             |          |       |       |  |  |  |                 |         |
|------------|----|-------------|----------|-------|-------|--|--|--|-----------------|---------|
| cg06916239 | 2  | 223,162,881 | 0.000574 | 0.367 | 0.370 |  |  |  | <i>PAX3</i>     | Body    |
| cg09662584 | 6  | 44,310,445  | 4.53E-25 | 0.367 | 0.388 |  |  |  | <i>SPATS1</i>   | 1stExon |
| cg08141615 | 12 | 110,172,214 | 9.42E-14 | 0.367 | 0.345 |  |  |  | <i>MGC14436</i> | Body    |
| cg22178238 | 7  | 158,362,809 | 8.78E-13 | 0.367 | 0.367 |  |  |  | <i>PTPRN2</i>   | Body    |
| cg10641714 | 5  | 43,193,681  | 1.09E-09 | 0.367 | 0.314 |  |  |  | <i>MGC42105</i> | 5'UTR   |
| cg23460843 | 2  | 127,644,075 | 0.023915 | 0.367 | 0.429 |  |  |  |                 |         |
| cg15366353 | 6  | 116,691,382 | 7.98E-24 | 0.367 | 0.317 |  |  |  | <i>DSE</i>      | TSS1500 |
| cg00714725 | 10 | 94,825,576  | 8.87E-05 | 0.367 | 0.212 |  |  |  | <i>CYP26C1</i>  | Body    |
| cg06844968 | 18 | 24,131,604  | 2.11E-28 | 0.367 | 0.335 |  |  |  | <i>KCTD1</i>    | 5'UTR   |
| cg08500417 | 7  | 102,574,445 | 3.78E-20 | 0.367 | 0.366 |  |  |  | <i>FBXL13</i>   | Body    |
| cg17733616 | 17 | 73,083,887  | 0.012063 | 0.367 | 0.162 |  |  |  | <i>SLC16A5</i>  | TSS200  |
| cg24516106 | 2  | 72,079,413  | 2.3E-23  | 0.366 | 0.351 |  |  |  |                 |         |
| cg06428620 | 5  | 140,864,276 | 6.68E-06 | 0.366 | 0.353 |  |  |  | <i>PCDHGA4</i>  | Body    |
| cg06718073 | 7  | 142,495,582 | 6.01E-10 | 0.366 | 0.337 |  |  |  |                 |         |
| cg08789022 | 2  | 27,484,942  | 1.31E-09 | 0.366 | 0.379 |  |  |  | <i>SLC30A3</i>  | Body    |
| cg01972979 | X  | 133,680,446 | 3.29E-08 | 0.366 | 0.352 |  |  |  | <i>MGC16121</i> | Body    |
| cg03367264 | 10 | 13,392,131  | 0.003939 | 0.366 | 0.252 |  |  |  |                 |         |
| cg14174055 | 2  | 97,203,640  | 1.07E-15 | 0.366 | 0.299 |  |  |  | <i>ARID5A</i>   | Body    |
| cg07778819 | 17 | 43,862,927  | 4.25E-06 | 0.366 | 0.260 |  |  |  | <i>CRHR1</i>    | Body    |
| cg12296772 | 8  | 17,271,067  | 0.004338 | 0.366 | 0.261 |  |  |  | <i>MTMR7</i>    | TSS200  |
| cg09354556 | 3  | 47,051,341  | 9.4E-11  | 0.366 | 0.324 |  |  |  |                 |         |
| cg18653451 | 19 | 46,917,018  | 1.08E-47 | 0.366 | 0.363 |  |  |  | <i>CCDC8</i>    | TSS200  |
| cg04234680 | 14 | 51,562,550  | 0.008662 | 0.366 | 0.240 |  |  |  | <i>TRIM9</i>    | TSS200  |
| cg25489866 | 15 | 59,729,553  | 0.005754 | 0.366 | 0.421 |  |  |  | <i>FAM81A</i>   | TSS1500 |
| cg02449166 | 10 | 131,748,481 | 1.62E-13 | 0.366 | 0.337 |  |  |  | <i>EBF3</i>     | Body    |
| cg15572489 | 7  | 157,481,091 | 3.11E-12 | 0.366 | 0.352 |  |  |  | <i>PTPRN2</i>   | Body    |
| cg05911774 | X  | 99,899,345  | 5.6E-19  | 0.366 | 0.364 |  |  |  | <i>SRPX2</i>    | 1stExon |
| cg21121496 | 19 | 55,592,930  | 1.15E-05 | 0.366 | 0.350 |  |  |  | <i>EPS8L1</i>   | Body    |
| cg07345934 | 1  | 31,845,943  | 0.000197 | 0.366 | 0.286 |  |  |  | <i>FABP3</i>    | TSS200  |
| cg22964842 | 10 | 102,495,141 | 0.000109 | 0.366 | 0.327 |  |  |  |                 |         |
| cg11134334 | 13 | 94,822,726  | 1.53E-30 | 0.366 | 0.346 |  |  |  | <i>GPC6</i>     | Body    |
| cg14024937 | 6  | 14,441,721  | 6.02E-22 | 0.366 | 0.365 |  |  |  |                 |         |
| cg13868604 | 20 | 42,875,931  | 5.8E-06  | 0.366 | 0.305 |  |  |  | <i>GDAP1L1</i>  | 5'UTR   |
| cg08018585 | 13 | 46,425,866  | 0.007712 | 0.366 | 0.341 |  |  |  | <i>SIAH3</i>    | TSS200  |

|            |    |             |          |       |       |          |       |     |                 |         |
|------------|----|-------------|----------|-------|-------|----------|-------|-----|-----------------|---------|
| cg01203385 | 2  | 21,022,844  | 0.00058  | 0.366 | 0.331 |          |       |     | <i>C2orf43</i>  | TSS200  |
| cg14239655 | 12 | 46,005,115  | 1.63E-13 | 0.366 | 0.341 |          |       |     |                 |         |
| cg04658021 | 17 | 8,056,967   | 3.04E-27 | 0.366 | 0.350 |          |       |     | <i>PER1</i>     | TSS1500 |
| cg16052975 | 17 | 15,821,016  | 3.95E-13 | 0.366 | 0.330 |          |       |     |                 |         |
| cg16399136 | 1  | 151,104,003 | 0.000153 | 0.366 | 0.374 |          |       |     |                 |         |
| cg04121938 | 1  | 201,509,415 | 2.84E-23 | 0.366 | 0.371 |          |       |     |                 |         |
| cg06291314 | 17 | 2,325,086   | 4E-17    | 0.366 | 0.365 |          |       |     | <i>METT10D</i>  | Body    |
| cg05070518 | 17 | 7,555,322   | 2.78E-13 | 0.366 | 0.320 |          |       |     | <i>ATP1B2</i>   | Body    |
| cg07621385 | 3  | 123,535,716 | 2.15E-22 | 0.366 | 0.350 |          |       |     | <i>MYLK</i>     | 5'UTR   |
| cg13916459 | 12 | 85,673,221  | 0.000261 | 0.366 | 0.393 |          |       |     | <i>ALX1</i>     | TSS1500 |
| cg14995036 | 1  | 94,146,705  | 1.86E-06 | 0.365 | 0.360 |          |       |     | <i>BCAR3</i>    | 5'UTR   |
| cg17933722 | 1  | 116,711,077 | 0.000746 | 0.365 | 0.322 |          |       |     |                 |         |
| cg24331598 | 10 | 101,280,256 | 2.71E-12 | 0.365 | 0.367 |          |       |     |                 |         |
| cg04177426 | X  | 150,863,969 | 0.010374 | 0.365 | 0.286 |          |       |     |                 |         |
| cg17124829 | 2  | 171,568,791 | 0.003776 | 0.365 | 0.269 |          |       |     |                 |         |
| cg05341781 | 1  | 164,723,567 | 4.17E-26 | 0.365 | 0.353 |          |       |     | <i>PBX1</i>     | Body    |
| cg07868599 | 16 | 3,079,708   | 3.26E-39 | 0.365 | 0.372 |          |       |     | <i>CCDC64B</i>  | Body    |
| cg24448259 | 7  | 29,186,110  | 0.000185 | 0.365 | 0.326 | 4.58E-15 | 0.192 |     | <i>CPVL</i>     | 5'UTR   |
| cg16692973 | X  | 119,445,209 | 7.04E-05 | 0.365 | 0.339 |          |       |     | <i>FAM70A</i>   | 1stExon |
| cg25387565 | 6  | 31,830,527  | 0.023132 | 0.365 | 0.331 |          |       |     | <i>NEU1</i>     | 1stExon |
| cg11857704 | 2  | 3,750,952   | 6.9E-05  | 0.365 | 0.393 |          |       |     |                 |         |
| cg11631271 | 19 | 38,700,487  | 0.002387 | 0.365 | 0.492 |          |       |     |                 |         |
| cg07097417 | 1  | 212,002,770 | 1.14E-25 | 0.365 | 0.358 |          |       |     | <i>LPGAT1</i>   | 5'UTR   |
| cg20078466 | 7  | 50,344,331  | 7.29E-06 | 0.365 | 0.374 |          |       |     | <i>IKZF1</i>    | TSS200  |
| cg12315302 | 6  | 26,189,340  | 0.003102 | 0.365 | 0.334 |          |       | Yes | <i>HIST1H4D</i> | TSS200  |
| cg09858022 | 17 | 38,465,333  | 5.32E-31 | 0.365 | 0.365 |          |       |     | <i>RARA</i>     | TSS200  |
| cg14499577 | 8  | 1,414,612   | 0.000158 | 0.365 | 0.429 |          |       |     |                 |         |
| cg06980169 | 12 | 111,127,139 | 5.42E-07 | 0.365 | 0.274 |          |       |     | <i>HVCN1</i>    | TSS200  |
| cg03156893 | 16 | 23,847,675  | 5.7E-14  | 0.365 | 0.355 |          |       |     | <i>PRKCB</i>    | Body    |
| cg02680314 | 16 | 3,097,387   | 4.06E-10 | 0.365 | 0.358 |          |       |     | <i>MMP25</i>    | Body    |
| cg23288298 | 2  | 43,451,559  | 3.75E-05 | 0.365 | 0.314 |          |       |     | <i>ZFP36L2</i>  | Body    |
| cg12929487 | 4  | 41,869,175  | 6.57E-08 | 0.365 | 0.333 |          |       |     |                 |         |
| cg00684125 | 7  | 21,209,165  | 1.93E-19 | 0.365 | 0.307 |          |       |     |                 |         |
| cg14024788 | 5  | 1,875,611   | 3.56E-09 | 0.365 | 0.374 |          |       |     |                 |         |

|            |    |             |          |       |       |          |       |  |                 |         |
|------------|----|-------------|----------|-------|-------|----------|-------|--|-----------------|---------|
| cg10266490 | 1  | 55,013,709  | 2.56E-23 | 0.365 | 0.372 | 8.45E-20 | 0.240 |  | <i>ACOT11</i>   | TSS200  |
| cg15156975 | 17 | 43,449,055  | 0.0014   | 0.365 | 0.341 |          |       |  |                 |         |
| cg27125645 | 12 | 124,246,434 | 0.000147 | 0.365 | 0.161 |          |       |  | <i>DNAH10</i>   | TSS1500 |
| cg00793186 | 5  | 139,283,100 | 7.09E-25 | 0.365 | 0.341 |          |       |  | <i>NRG2</i>     | Body    |
| cg25339566 | 1  | 67,218,165  | 6.12E-08 | 0.365 | 0.339 |          |       |  | <i>TCTEX1D1</i> | 5'UTR   |
| cg03348397 | 8  | 54,789,648  | 1.44E-18 | 0.365 | 0.342 |          |       |  | <i>RGS20</i>    | Body    |
| cg05126289 | 1  | 156,995,411 | 6.36E-20 | 0.365 | 0.342 |          |       |  | <i>ARHGEF11</i> | Body    |
| cg13409449 | 10 | 8,097,354   | 7.91E-06 | 0.365 | 0.341 |          |       |  | <i>GATA3</i>    | 5'UTR   |
| cg20800956 | 1  | 171,811,477 | 0.030927 | 0.365 | 0.165 |          |       |  | <i>DNM3</i>     | Body    |
| cg23101464 | 8  | 144,640,755 | 0.000412 | 0.365 | 0.261 |          |       |  | <i>GSDMD</i>    | 5'UTR   |
| cg14632485 | 11 | 113,216,820 | 2.55E-12 | 0.365 | 0.321 |          |       |  | <i>TTC12</i>    | Body    |
| cg10474350 | 7  | 27,196,555  | 7.62E-06 | 0.365 | 0.387 |          |       |  | <i>HOXA7</i>    | TSS1500 |
| cg26459372 | 7  | 45,613,676  | 1.47E-14 | 0.365 | 0.358 |          |       |  | <i>ADCY1</i>    | TSS1500 |
| cg07663732 | 19 | 41,882,741  | 5.56E-17 | 0.365 | 0.356 |          |       |  | <i>TMEM91</i>   | 1stExon |
| cg20293650 | 6  | 16,180,549  | 7.02E-13 | 0.365 | 0.329 |          |       |  |                 |         |
| cg23560546 | 2  | 159,652,019 | 5.4E-18  | 0.365 | 0.362 |          |       |  | <i>DAPL1</i>    | Body    |
| cg26051755 | 2  | 97,198,107  | 1.27E-08 | 0.365 | 0.329 |          |       |  |                 |         |
| cg04060356 | 20 | 52,226,170  | 9.66E-05 | 0.364 | 0.295 |          |       |  |                 |         |
| cg26009486 | 14 | 24,838,008  | 5.17E-20 | 0.364 | 0.337 |          |       |  | <i>NFATC4</i>   | Body    |
| cg25552843 | 10 | 106,088,702 | 0.001037 | 0.364 | 0.415 |          |       |  | <i>ITPRIP</i>   | 5'UTR   |
| cg07871590 | 7  | 127,671,193 | 0.016994 | 0.364 | 0.248 |          |       |  | <i>LRRC4</i>    | TSS200  |
| cg11036833 | 5  | 115,152,494 | 0.00052  | 0.364 | 0.198 |          |       |  | <i>CDO1</i>     | TSS200  |
| cg11613015 | 5  | 112,073,406 | 0.021411 | 0.364 | 0.185 |          |       |  | <i>APC</i>      | TSS200  |
| cg22675937 | 17 | 59,481,571  | 3.52E-19 | 0.364 | 0.372 |          |       |  | <i>TBX2</i>     | Body    |
| cg15590989 | 4  | 183,062,460 | 1.14E-08 | 0.364 | 0.289 |          |       |  | <i>MGC45800</i> | Body    |
| cg09983326 | 2  | 43,451,308  | 7.77E-06 | 0.364 | 0.321 |          |       |  | <i>ZFP36L2</i>  | 3'UTR   |
| cg04540383 | 3  | 50,378,611  | 2.49E-07 | 0.364 | 0.359 |          |       |  | <i>RASSF1</i>   | TSS1500 |
| cg18395917 | 11 | 76,033,367  | 1.06E-35 | 0.364 | 0.359 |          |       |  |                 |         |
| cg24340926 | X  | 129,305,036 | 8.94E-05 | 0.364 | 0.223 | 4.34E-38 | 0.304 |  | <i>RAB33A</i>   | TSS1500 |
| cg26450149 | 7  | 47,375,903  | 7.62E-45 | 0.364 | 0.365 |          |       |  | <i>TNS3</i>     | Body    |
| cg02094273 | 11 | 86,636,018  | 1.44E-19 | 0.364 | 0.363 |          |       |  |                 |         |
| cg24641993 | 5  | 150,537,046 | 0.003099 | 0.364 | 0.160 |          |       |  | <i>ANXA6</i>    | 5'UTR   |
| cg18347921 | 6  | 29,975,366  | 1.07E-19 | 0.364 | 0.363 |          |       |  | <i>HLA-J</i>    | Body    |
| cg19437285 | 5  | 148,650,972 | 1.41E-30 | 0.364 | 0.358 |          |       |  | <i>AFAP1L1</i>  | TSS1500 |

|            |    |             |          |       |       |          |       |  |                  |         |
|------------|----|-------------|----------|-------|-------|----------|-------|--|------------------|---------|
| cg01492330 | 12 | 53,184,005  | 8.77E-05 | 0.364 | 0.398 |          |       |  | <i>KRT3</i>      | Body    |
| cg09003023 | 6  | 29,974,253  | 1.55E-09 | 0.364 | 0.350 |          |       |  | <i>HLA-J</i>     | Body    |
| cg13656752 | 5  | 171,538,334 | 1.11E-09 | 0.364 | 0.351 |          |       |  | <i>STK10</i>     | Body    |
| cg20640433 | 6  | 129,204,206 | 2.32E-05 | 0.364 | 0.337 | 5.35E-18 | 0.267 |  | <i>LAMA2</i>     | TSS200  |
| cg18591496 | 19 | 41,595,977  | 9.87E-19 | 0.364 | 0.355 |          |       |  | <i>CYP2A13</i>   | Body    |
| cg18393747 | 13 | 96,205,295  | 3.94E-05 | 0.364 | 0.385 |          |       |  | <i>CLDN10</i>    | Body    |
| cg01642521 | 11 | 20,618,250  | 0.00347  | 0.364 | 0.329 |          |       |  |                  |         |
| cg11659501 | 12 | 81,471,678  | 3.21E-07 | 0.364 | 0.328 |          |       |  | <i>ACSS3</i>     | TSS200  |
| cg08233811 | 6  | 21,667,333  | 5.64E-13 | 0.364 | 0.335 |          |       |  | <i>FLJ22536</i>  | Body    |
| cg16329197 | 12 | 53,359,506  | 2.75E-10 | 0.364 | 0.338 |          |       |  |                  |         |
| cg05375728 | 1  | 58,715,539  | 0.000746 | 0.364 | 0.334 |          |       |  | <i>DAB1</i>      | 5'UTR   |
| cg12589143 | 6  | 29,894,341  | 3.2E-07  | 0.364 | 0.374 |          |       |  | <i>HCG4P6</i>    | TSS1500 |
| cg00659931 | 15 | 102,010,125 | 4.55E-23 | 0.364 | 0.362 |          |       |  | <i>PCSK6</i>     | Body    |
| cg13102294 | 6  | 32,121,393  | 9.95E-26 | 0.364 | 0.338 |          |       |  | <i>PPT2</i>      | TSS1500 |
| cg01611017 | 14 | 95,780,344  | 2.3E-17  | 0.364 | 0.375 |          |       |  | <i>CLMN</i>      | Body    |
| cg05906166 | 19 | 16,437,057  | 1.61E-17 | 0.364 | 0.352 |          |       |  | <i>KLF2</i>      | Body    |
| cg13759905 | 2  | 233,741,920 | 1.35E-20 | 0.364 | 0.307 |          |       |  |                  |         |
| cg00645339 | 15 | 45,670,875  | 7.42E-08 | 0.364 | 0.370 |          |       |  | <i>LOC145663</i> | TSS200  |
| cg13213923 | 17 | 60,885,491  | 0.000336 | 0.364 | 0.356 |          |       |  | <i>MARCH10</i>   | 5'UTR   |
| cg13038685 | 14 | 77,504,478  | 3.35E-22 | 0.364 | 0.385 |          |       |  |                  |         |
| cg12902896 | 3  | 37,987,838  | 4.35E-24 | 0.364 | 0.322 |          |       |  | <i>CTDSPL</i>    | Body    |
| cg00944193 | 13 | 36,044,860  | 0.002071 | 0.363 | 0.468 |          |       |  | <i>NBEA</i>      | Body    |
| cg12175729 | 8  | 140,715,540 | 7.97E-07 | 0.363 | 0.387 |          |       |  | <i>KCNK9</i>     | TSS1500 |
| cg27448110 | 7  | 157,484,647 | 6.71E-39 | 0.363 | 0.363 |          |       |  | <i>PTPRN2</i>    | Body    |
| cg05312353 | 6  | 17,102,678  | 0.000113 | 0.363 | 0.244 |          |       |  |                  |         |
| cg26107476 | 1  | 202,054,898 | 1.08E-16 | 0.363 | 0.358 |          |       |  |                  |         |
| cg23217512 | 15 | 70,877,866  | 1.44E-08 | 0.363 | 0.299 |          |       |  |                  |         |
| cg21195256 | 14 | 29,244,278  | 0.011876 | 0.363 | 0.263 |          |       |  | <i>C14orf23</i>  | Body    |
| cg08118140 | 1  | 56,397,447  | 4.07E-49 | 0.363 | 0.331 |          |       |  |                  |         |
| cg07227926 | 12 | 104,609,526 | 1.64E-12 | 0.363 | 0.344 |          |       |  | <i>TXNRD1</i>    | TSS200  |
| cg24563094 | 2  | 26,395,458  | 0.007372 | 0.363 | 0.294 |          |       |  | <i>FAM59B</i>    | TSS1500 |
| cg02348751 | 4  | 183,064,035 | 5.57E-08 | 0.363 | 0.361 |          |       |  | <i>MGC45800</i>  | Body    |
| cg17990771 | 6  | 32,223,226  | 3.31E-05 | 0.363 | 0.383 |          |       |  |                  |         |
| cg14383422 | 2  | 201,450,962 | 4.42E-05 | 0.363 | 0.306 |          |       |  | <i>AOX1</i>      | Body    |



|            |    |             |          |       |       |          |       |  |                 |         |
|------------|----|-------------|----------|-------|-------|----------|-------|--|-----------------|---------|
| cg15417365 | 17 | 56,609,082  | 4.62E-08 | 0.363 | 0.256 |          |       |  | <i>SEPT4</i>    | Body    |
| cg09065413 | 1  | 45,285,821  | 1.62E-05 | 0.363 | 0.419 |          |       |  | <i>PTCH2</i>    | 3'UTR   |
| cg15062377 | 1  | 200,004,205 | 3.05E-17 | 0.363 | 0.352 |          |       |  | <i>NR5A2</i>    | Body    |
| cg11076306 | 4  | 41,430,667  | 2.36E-10 | 0.363 | 0.357 |          |       |  | <i>LIMCH1</i>   | Body    |
| cg20289949 | 2  | 43,019,614  | 7.41E-07 | 0.363 | 0.214 |          |       |  | <i>HAAO</i>     | 1stExon |
| cg04787024 | 2  | 99,553,442  | 0.000157 | 0.363 | 0.391 |          |       |  | <i>C2orf55</i>  | TSS1500 |
| cg18437710 | 19 | 51,522,894  | 4.67E-11 | 0.363 | 0.374 |          |       |  | <i>KLK10</i>    | 5'UTR   |
| cg25025879 | 12 | 53,359,317  | 5.13E-17 | 0.363 | 0.344 |          |       |  |                 |         |
| cg22621867 | 3  | 51,990,301  | 0.000206 | 0.363 | 0.397 |          |       |  | <i>GPR62</i>    | 1stExon |
| cg25677261 | 15 | 102,009,856 | 1.37E-32 | 0.363 | 0.361 |          |       |  | <i>PCSK6</i>    | Body    |
| cg18818075 | 6  | 44,528,865  | 8.95E-10 | 0.363 | 0.279 |          |       |  |                 |         |
| cg24679890 | 19 | 17,246,356  | 3.49E-11 | 0.363 | 0.394 |          |       |  | <i>MYO9B</i>    | Body    |
| cg11028201 | 4  | 41,867,562  | 0.000179 | 0.363 | 0.363 |          |       |  |                 |         |
| cg08285646 | 16 | 69,432,500  | 8.22E-24 | 0.363 | 0.327 |          |       |  |                 |         |
| cg06720425 | 3  | 25,469,694  | 1.27E-19 | 0.363 | 0.325 |          |       |  | <i>RARB</i>     | TSS200  |
| cg16049283 | 1  | 6,419,606   | 6.84E-25 | 0.363 | 0.363 |          |       |  | <i>ACOT7</i>    | Body    |
| cg27494383 | 15 | 41,805,868  | 6.68E-07 | 0.363 | 0.392 | 6.33E-09 | 0.151 |  | <i>LTK</i>      | 1stExon |
| cg07627556 | 11 | 115,530,590 | 4.94E-07 | 0.363 | 0.325 |          |       |  |                 |         |
| cg15436123 | 4  | 3,390,332   | 5.17E-12 | 0.363 | 0.406 |          |       |  | <i>RGS12</i>    | Body    |
| cg22773661 | 4  | 48,492,225  | 0.006489 | 0.363 | 0.335 |          |       |  | <i>ZAR1</i>     | TSS200  |
| cg02058408 | 17 | 20,687,681  | 3.05E-05 | 0.362 | 0.313 |          |       |  |                 |         |
| cg09242181 | 11 | 46,940,517  | 4.05E-10 | 0.362 | 0.362 |          |       |  | <i>LRP4</i>     | TSS1500 |
| cg00371702 | 3  | 25,469,125  | 1.53E-14 | 0.362 | 0.314 |          |       |  | <i>RARB</i>     | TSS1500 |
| cg01059100 | 16 | 31,214,607  | 6.76E-25 | 0.362 | 0.313 |          |       |  | <i>PYCARD</i>   | TSS1500 |
| cg23376821 | 6  | 45,391,365  | 0.001884 | 0.362 | 0.371 |          |       |  | <i>RUNX2</i>    | Body    |
| cg24192569 | 7  | 4,184,151   | 4.96E-23 | 0.362 | 0.386 |          |       |  | <i>SDK1</i>     | Body    |
| cg15717448 | 5  | 171,234,429 | 3.87E-08 | 0.362 | 0.332 |          |       |  |                 |         |
| cg13714344 | 12 | 6,938,635   | 1.07E-08 | 0.362 | 0.357 |          |       |  | <i>LEPREL2</i>  | Body    |
| cg08687386 | 6  | 30,711,206  | 2.26E-29 | 0.362 | 0.331 |          |       |  | <i>IER3</i>     | 3'UTR   |
| cg01758418 | X  | 70,151,160  | 2.21E-08 | 0.362 | 0.343 |          |       |  | <i>SLC7A3</i>   | TSS1500 |
| cg23024158 | 10 | 78,011,952  | 2.69E-16 | 0.362 | 0.295 |          |       |  | <i>C10orf11</i> | Body    |
| cg14511739 | 5  | 112,073,373 | 0.021305 | 0.362 | 0.170 |          |       |  | <i>APC</i>      | TSS200  |
| cg02614217 | 4  | 122,632,774 | 2.7E-08  | 0.362 | 0.352 |          |       |  |                 |         |
| cg08167706 | 7  | 134,144,106 | 5.04E-08 | 0.362 | 0.244 |          |       |  | <i>AKR1B1</i>   | TSS1500 |

|            |    |             |          |       |       |          |       |     |                 |         |
|------------|----|-------------|----------|-------|-------|----------|-------|-----|-----------------|---------|
| cg10445911 | 1  | 154,971,922 | 0.00291  | 0.362 | 0.365 |          |       |     |                 |         |
| cg23426945 | 10 | 77,190,054  | 1.09E-10 | 0.362 | 0.342 |          |       |     |                 |         |
| cg26459819 | 11 | 111,169,457 | 3.83E-22 | 0.362 | 0.362 |          |       |     | <i>C11orf93</i> | TSS1500 |
| cg09611490 | 2  | 97,193,080  | 2.46E-30 | 0.362 | 0.347 |          |       |     |                 |         |
| cg09107344 | 12 | 53,612,734  | 6.56E-17 | 0.362 | 0.384 |          |       |     | <i>RARG</i>     | Body    |
| cg21472506 | 2  | 63,283,967  | 1.86E-06 | 0.362 | 0.357 |          |       |     | <i>OTX1</i>     | 3'UTR   |
| cg00246451 | 1  | 155,949,012 | 5.93E-10 | 0.362 | 0.356 |          |       |     | <i>ARHGEF2</i>  | TSS1500 |
| cg12134633 | 15 | 32,934,004  | 2.08E-09 | 0.362 | 0.275 |          |       |     | <i>SCG5</i>     | 5'UTR   |
| cg26195583 | 4  | 41,869,348  | 6.58E-09 | 0.362 | 0.344 |          |       |     |                 |         |
| cg23016080 | 15 | 44,486,450  | 4.95E-06 | 0.362 | 0.313 |          |       |     | <i>FRMD5</i>    | Body    |
| cg08076018 | 9  | 129,885,080 | 4.56E-07 | 0.362 | 0.315 |          |       |     | <i>ANGPTL2</i>  | TSS200  |
| cg06760830 | 1  | 47,079,672  | 2.78E-09 | 0.362 | 0.399 |          |       |     | <i>MOBK12C</i>  | Body    |
| cg22489153 | 12 | 115,136,175 | 5.06E-12 | 0.362 | 0.331 |          |       |     |                 |         |
| cg02273392 | 7  | 100,770,414 | 4.59E-09 | 0.362 | 0.358 | 9.11E-29 | 0.201 |     | <i>SERPINE1</i> | 5'UTR   |
| cg04772683 | 19 | 51,522,641  | 0.006691 | 0.362 | 0.376 |          |       |     | <i>KLK10</i>    | 5'UTR   |
| cg04134279 | 8  | 496,327     | 5.05E-11 | 0.362 | 0.283 |          |       |     | <i>C8orf42</i>  | TSS1500 |
| cg06599914 | 11 | 32,915,903  | 1.7E-05  | 0.362 | 0.425 |          |       |     | <i>QSER1</i>    | 5'UTR   |
| cg13084536 | 5  | 139,076,824 | 7.68E-18 | 0.362 | 0.336 |          |       |     |                 |         |
| cg25620356 | 7  | 18,535,407  | 2.84E-05 | 0.362 | 0.319 |          |       |     | <i>HDAC9</i>    | TSS1500 |
| cg08516516 | 5  | 115,152,492 | 0.001624 | 0.362 | 0.192 |          |       |     | <i>CDO1</i>     | TSS200  |
| cg25054754 | 4  | 169,754,328 | 8.85E-06 | 0.362 | 0.402 |          |       |     | <i>PALLD</i>    | 5'UTR   |
| cg21903079 | 14 | 24,457,915  | 4.7E-25  | 0.362 | 0.331 |          |       |     | <i>DHRS4L2</i>  | TSS200  |
| cg19896129 | 1  | 63,156,450  | 2.38E-18 | 0.362 | 0.340 |          |       |     |                 |         |
| cg07035145 | 14 | 51,410,689  | 0.000128 | 0.362 | 0.374 |          |       |     | <i>PYGL</i>     | Body    |
| cg03186486 | 3  | 68,980,947  | 2.93E-06 | 0.362 | 0.345 |          |       |     | <i>FAM19A4</i>  | 5'UTR   |
| cg00655913 | 1  | 228,633,920 | 1.19E-07 | 0.362 | 0.391 |          |       |     |                 |         |
| cg12976581 | 6  | 29,975,032  | 6.47E-10 | 0.362 | 0.347 |          |       |     | <i>HLA-J</i>    | Body    |
| cg10763594 | 2  | 218,258,333 | 1.72E-11 | 0.361 | 0.325 |          |       | Yes | <i>DIRC3</i>    | Body    |
| cg22819422 | 10 | 3,108,507   | 2.6E-37  | 0.361 | 0.362 |          |       |     | <i>PFKP</i>     | TSS1500 |
| cg08481075 | 6  | 33,161,328  | 0.001253 | 0.361 | 0.311 |          |       |     | <i>COL11A2</i>  | TSS1500 |
| cg26973714 | 12 | 104,609,524 | 1.42E-13 | 0.361 | 0.326 |          |       |     | <i>TXNRD1</i>   | TSS200  |
| cg04719903 | 1  | 1,181,956   | 1.04E-26 | 0.361 | 0.321 |          |       |     | <i>FAM132A</i>  | 1stExon |
| cg20066782 | 7  | 102,574,504 | 3.58E-18 | 0.361 | 0.354 |          |       |     | <i>FBXL13</i>   | Body    |
| cg07100000 | 5  | 170,877,840 | 3.69E-18 | 0.361 | 0.344 |          |       |     | <i>FGF18</i>    | Body    |

|            |    |             |          |       |       |          |       |  |                 |         |
|------------|----|-------------|----------|-------|-------|----------|-------|--|-----------------|---------|
| cg12126857 | 1  | 35,384,669  | 0.001505 | 0.361 | 0.353 |          |       |  |                 |         |
| cg18738581 | 3  | 9,944,183   | 6.59E-11 | 0.361 | 0.358 |          |       |  | <i>IL17RE</i>   | TSS200  |
| cg07978472 | 4  | 122,686,493 | 3.85E-06 | 0.361 | 0.252 |          |       |  | <i>TMEM155</i>  | TSS200  |
| cg10935662 | 3  | 72,307,754  | 1.19E-15 | 0.361 | 0.341 |          |       |  |                 |         |
| cg18082515 | 10 | 95,197,126  | 7.5E-16  | 0.361 | 0.350 |          |       |  | <i>MYOF</i>     | Body    |
| cg11840125 | 14 | 23,834,860  | 0.004478 | 0.361 | 0.391 |          |       |  | <i>EFS</i>      | TSS200  |
| cg23196756 | 10 | 72,165,580  | 1.24E-14 | 0.361 | 0.353 |          |       |  | <i>EIF4EBP2</i> | Body    |
| cg18995088 | 5  | 134,914,734 | 2.2E-06  | 0.361 | 0.334 | 6.94E-12 | 0.177 |  | <i>CXCL14</i>   | 5'UTR   |
| cg03131732 | 11 | 46,317,475  | 3.32E-10 | 0.361 | 0.275 |          |       |  | <i>CREB3L1</i>  | Body    |
| cg11296826 | 1  | 40,236,125  | 7.15E-23 | 0.361 | 0.370 |          |       |  | <i>BMP8B</i>    | Body    |
| cg13826247 | 12 | 54,424,203  | 3.69E-12 | 0.361 | 0.289 |          |       |  | <i>HOXC4</i>    | 5'UTR   |
| cg01680010 | 7  | 96,647,117  | 4.47E-08 | 0.361 | 0.373 |          |       |  |                 |         |
| cg04276005 | 1  | 180,895,868 | 4.34E-31 | 0.361 | 0.355 |          |       |  | <i>KIAA1614</i> | Body    |
| cg21535657 | 12 | 11,806,362  | 1.82E-17 | 0.361 | 0.348 |          |       |  | <i>ETV6</i>     | Body    |
| cg25588389 | 7  | 2,654,420   | 6.11E-06 | 0.361 | 0.274 |          |       |  |                 |         |
| cg13837913 | 6  | 26,189,410  | 0.026618 | 0.361 | 0.327 |          |       |  | <i>HIST1H4D</i> | TSS200  |
| cg08598483 | 6  | 29,975,145  | 1.69E-15 | 0.361 | 0.358 |          |       |  | <i>HLA-J</i>    | Body    |
| cg21081729 | 5  | 112,539,140 | 2.04E-07 | 0.361 | 0.334 |          |       |  | <i>MCC</i>      | Body    |
| cg01356950 | 2  | 175,546,714 | 7.16E-08 | 0.361 | 0.255 |          |       |  | <i>WIPF1</i>    | 5'UTR   |
| cg09469554 | 13 | 96,204,917  | 0.013381 | 0.361 | 0.410 |          |       |  | <i>CLDN10</i>   | TSS200  |
| cg09168808 | 12 | 115,124,584 | 9.59E-19 | 0.361 | 0.324 |          |       |  |                 |         |
| cg26069562 | 6  | 29,691,981  | 3.38E-06 | 0.361 | 0.267 |          |       |  | <i>HLA-F</i>    | Body    |
| cg25267808 | 11 | 95,779,454  | 5.01E-14 | 0.360 | 0.363 |          |       |  | <i>MAML2</i>    | Body    |
| cg11608150 | 5  | 135,415,948 | 1.78E-05 | 0.360 | 0.316 |          |       |  |                 |         |
| cg10215401 | 8  | 131,058,332 | 1.39E-20 | 0.360 | 0.356 |          |       |  |                 |         |
| cg23258678 | 1  | 200,004,095 | 2.09E-10 | 0.360 | 0.353 |          |       |  | <i>NR5A2</i>    | Body    |
| cg03070989 | 19 | 34,311,482  | 0.000139 | 0.360 | 0.358 |          |       |  |                 |         |
| cg16355305 | 12 | 65,220,152  | 2.46E-17 | 0.360 | 0.313 |          |       |  |                 |         |
| cg24394631 | 17 | 43,863,000  | 6.87E-07 | 0.360 | 0.303 |          |       |  | <i>CRHR1</i>    | Body    |
| cg04791080 | 15 | 68,771,946  | 3.3E-23  | 0.360 | 0.356 |          |       |  |                 |         |
| cg17511472 | 4  | 3,485,326   | 7.7E-15  | 0.360 | 0.312 |          |       |  | <i>DOK7</i>     | Body    |
| cg10356613 | 17 | 35,294,491  | 0.001362 | 0.360 | 0.395 |          |       |  | <i>LHX1</i>     | TSS200  |
| cg05313153 | 8  | 119,122,430 | 2.76E-15 | 0.360 | 0.379 |          |       |  | <i>EXT1</i>     | 1stExon |
| cg11299991 | 3  | 157,154,687 | 3.26E-13 | 0.360 | 0.355 |          |       |  | <i>PTX3</i>     | 5'UTR   |

|            |    |             |          |       |       |          |       |     |                  |         |
|------------|----|-------------|----------|-------|-------|----------|-------|-----|------------------|---------|
| cg26895804 | 8  | 145,917,243 | 1.65E-20 | 0.360 | 0.368 |          |       |     |                  |         |
| cg26015416 | 1  | 108,023,482 | 1.71E-13 | 0.360 | 0.303 |          |       |     | <i>NTNG1</i>     | 3'UTR   |
| cg14687145 | 2  | 29,234,537  | 3.13E-05 | 0.360 | 0.376 |          |       |     | <i>FAM179A</i>   | Body    |
| cg06616710 | 10 | 99,473,224  | 3.4E-08  | 0.360 | 0.317 |          |       |     | <i>MARVELD1</i>  | TSS1500 |
| cg00011994 | 6  | 30,711,904  | 3.26E-09 | 0.360 | 0.359 |          |       |     | <i>FLOT1</i>     | TSS1500 |
| cg27038634 | 8  | 49,468,341  | 1.26E-20 | 0.360 | 0.369 |          |       |     |                  |         |
| cg18004701 | 7  | 157,481,628 | 1.38E-10 | 0.360 | 0.358 |          |       |     | <i>PTPRN2</i>    | Body    |
| cg19067730 | 20 | 44,518,824  | 3.15E-11 | 0.360 | 0.259 | 6.73E-10 | 0.153 |     | <i>CTSA</i>      | TSS1500 |
| cg19267596 | 19 | 15,334,821  | 3.37E-06 | 0.360 | 0.240 |          |       |     |                  |         |
| cg06945523 | 14 | 36,974,800  | 0.002296 | 0.360 | 0.415 |          |       |     | <i>SFTA3</i>     | Body    |
| cg09408571 | 1  | 101,003,634 | 2.25E-30 | 0.360 | 0.376 |          |       |     | <i>GPR88</i>     | TSS200  |
| cg11024449 | X  | 70,150,787  | 0.031688 | 0.360 | 0.397 |          |       |     | <i>SLC7A3</i>    | 5'UTR   |
| cg10625365 | 1  | 168,196,658 | 2.21E-16 | 0.360 | 0.348 |          |       | Yes | <i>SFT2D2</i>    | Body    |
| cg07146104 | 1  | 16,489,048  | 3.76E-13 | 0.360 | 0.338 |          |       |     |                  |         |
| cg24922129 | 11 | 129,242,530 | 6.78E-09 | 0.360 | 0.349 |          |       |     |                  |         |
| cg10553890 | 11 | 83,074,588  | 2.94E-08 | 0.360 | 0.379 |          |       |     |                  |         |
| cg10304637 | 6  | 6,003,220   | 0.002158 | 0.360 | 0.343 |          |       |     | <i>NRN1</i>      | Body    |
| cg18111443 | 19 | 20,349,275  | 0.042045 | 0.360 | 0.193 |          |       |     |                  |         |
| cg02550961 | 15 | 45,406,866  | 0.000158 | 0.360 | 0.353 |          |       |     | <i>DUOXA2</i>    | 1stExon |
| cg06785746 | 17 | 44,896,166  | 1.45E-06 | 0.360 | 0.389 |          |       |     | <i>WNT3</i>      | TSS200  |
| cg23183906 | 19 | 16,187,089  | 0.00221  | 0.360 | 0.341 |          |       |     | <i>TPM4</i>      | Body    |
| cg08364561 | 11 | 31,846,844  | 9.05E-05 | 0.360 | 0.388 |          |       |     |                  |         |
| cg26666133 | 12 | 90,101,389  | 0.000467 | 0.360 | 0.392 |          |       |     | <i>LOC338758</i> | TSS1500 |
| cg13039251 | 5  | 32,018,601  | 3.1E-20  | 0.360 | 0.332 |          |       |     | <i>PDZD2</i>     | Body    |
| cg06832339 | 7  | 23,842,119  | 1.47E-19 | 0.360 | 0.320 |          |       |     | <i>STK31</i>     | Body    |
| cg19545232 | 14 | 70,654,247  | 7.79E-08 | 0.359 | 0.266 |          |       |     | <i>SLC8A3</i>    | 5'UTR   |
| cg16414149 | 7  | 1,294,013   | 8.41E-18 | 0.359 | 0.362 |          |       |     |                  |         |
| cg09480054 | 2  | 43,020,129  | 7.4E-07  | 0.359 | 0.204 |          |       |     | <i>HAAO</i>      | TSS1500 |
| cg06077978 | X  | 48,690,457  | 0.00033  | 0.359 | 0.451 |          |       |     | <i>PCSK1N</i>    | Body    |
| cg25349820 | 22 | 25,346,354  | 4.7E-08  | 0.359 | 0.385 |          |       |     |                  |         |
| cg08268798 | 20 | 42,955,472  | 0.00128  | 0.359 | 0.347 |          |       |     |                  |         |
| cg15763670 | 10 | 73,473,235  | 7.68E-15 | 0.359 | 0.343 |          |       |     | <i>C10orf105</i> | 3'UTR   |
| cg01146320 | 11 | 120,080,945 | 1.7E-11  | 0.359 | 0.332 |          |       |     | <i>OAF</i>       | TSS1500 |
| cg17330251 | 7  | 94,953,956  | 4.51E-13 | 0.359 | 0.317 |          |       |     | <i>PON1</i>      | TSS200  |

|            |    |             |          |       |       |         |       |  |                |         |
|------------|----|-------------|----------|-------|-------|---------|-------|--|----------------|---------|
| cg03053374 | 17 | 38,465,422  | 1.23E-18 | 0.359 | 0.360 |         |       |  | <i>RARA</i>    | TSS200  |
| cg06460983 | 10 | 91,092,340  | 8.22E-06 | 0.359 | 0.298 |         |       |  | <i>IFIT3</i>   | Body    |
| cg23837109 | 10 | 75,670,435  | 4.88E-27 | 0.359 | 0.334 |         |       |  | <i>PLAU</i>    | TSS1500 |
| cg21741562 | 3  | 87,138,387  | 4.19E-05 | 0.359 | 0.318 |         |       |  |                |         |
| cg10721782 | 15 | 90,039,809  | 4.35E-13 | 0.359 | 0.364 |         |       |  | <i>RHCG</i>    | TSS200  |
| cg27510182 | 1  | 58,715,553  | 0.001803 | 0.359 | 0.353 |         |       |  | <i>DAB1</i>    | 5'UTR   |
| cg12914657 | 7  | 150,413,680 | 1.94E-13 | 0.359 | 0.369 | 4.4E-34 | 0.265 |  | <i>GIMAP1</i>  | TSS200  |
| cg02635932 | 10 | 18,549,778  | 5.82E-20 | 0.359 | 0.344 |         |       |  | <i>CACNB2</i>  | 1stExon |
| cg15045802 | 19 | 1,857,434   | 0.014349 | 0.359 | 0.293 |         |       |  | <i>KLF16</i>   | Body    |
| cg05308656 | 2  | 235,406,291 | 3.9E-50  | 0.359 | 0.339 |         |       |  | <i>ARL4C</i>   | TSS1500 |
| cg21606490 | 1  | 108,023,428 | 5.6E-13  | 0.359 | 0.296 |         |       |  | <i>NTNG1</i>   | Body    |
| cg00510539 | 2  | 27,958,611  | 0.000318 | 0.359 | 0.224 |         |       |  |                |         |
| cg13573928 | 4  | 169,754,534 | 7.43E-09 | 0.359 | 0.373 |         |       |  | <i>PALLD</i>   | 5'UTR   |
| cg09516476 | 6  | 10,881,925  | 1.93E-14 | 0.359 | 0.338 |         |       |  | <i>GCM2</i>    | Body    |
| cg07173972 | 20 | 61,583,979  | 1.94E-05 | 0.359 | 0.345 |         |       |  | <i>SLC17A9</i> | TSS200  |
| cg23122109 | 2  | 228,582,688 | 5.05E-05 | 0.359 | 0.237 |         |       |  | <i>SLC19A3</i> | 5'UTR   |
| cg04775710 | 6  | 30,712,022  | 9.05E-05 | 0.359 | 0.359 |         |       |  | <i>IER3</i>    | Body    |
| cg17389738 | 6  | 30,711,642  | 4.82E-28 | 0.359 | 0.361 |         |       |  | <i>IER3</i>    | 3'UTR   |
| cg27071460 | 5  | 40,681,893  | 1.89E-10 | 0.359 | 0.367 |         |       |  | <i>PTGER4</i>  | Body    |
| cg10210594 | 1  | 208,132,787 | 0.003576 | 0.359 | 0.346 |         |       |  |                |         |
| cg08382226 | 6  | 108,440,339 | 0.000186 | 0.359 | 0.361 |         |       |  |                |         |
| cg11909912 | 17 | 43,974,919  | 1.01E-16 | 0.359 | 0.326 |         |       |  | <i>MAPT</i>    | 5'UTR   |
| cg22325530 | 12 | 111,127,346 | 7.81E-06 | 0.359 | 0.312 |         |       |  | <i>HVCN1</i>   | TSS1500 |
| cg19624849 | 1  | 145,415,412 | 2.29E-06 | 0.358 | 0.409 |         |       |  | <i>HFE2</i>    | 5'UTR   |
| cg15202006 | 8  | 68,658,566  | 2.72E-09 | 0.358 | 0.331 |         |       |  | <i>CPA6</i>    | 1stExon |
| cg02071670 | 15 | 89,438,918  | 1.17E-56 | 0.358 | 0.337 |         |       |  | <i>HAPLN3</i>  | TSS200  |
| cg01616225 | 16 | 57,662,347  | 4.55E-14 | 0.358 | 0.342 |         |       |  | <i>GPR56</i>   | TSS200  |
| cg20559385 | 6  | 106,049,591 | 4.63E-19 | 0.358 | 0.341 |         |       |  |                |         |
| cg10869581 | X  | 102,000,905 | 0.002934 | 0.358 | 0.290 |         |       |  | <i>BHLHB9</i>  | TSS200  |
| cg05226168 | 16 | 68,118,441  | 5.17E-32 | 0.358 | 0.338 |         |       |  | <i>NFATC3</i>  | TSS1500 |
| cg12225220 | 4  | 87,281,434  | 3.03E-10 | 0.358 | 0.363 |         |       |  | <i>MAPK10</i>  | TSS200  |
| cg01224366 | 21 | 45,148,694  | 0.001268 | 0.358 | 0.271 |         |       |  | <i>PDXK</i>    | Body    |
| cg00158683 | 3  | 48,632,625  | 0.001674 | 0.358 | 0.348 |         |       |  | <i>COL7A1</i>  | TSS200  |
| cg14808329 | 5  | 133,863,570 | 0.003097 | 0.358 | 0.334 |         |       |  | <i>PHF15</i>   | 5'UTR   |

|            |    |             |          |       |       |          |       |  |     |                   |         |
|------------|----|-------------|----------|-------|-------|----------|-------|--|-----|-------------------|---------|
| cg11045524 | 9  | 133,320,781 | 0.001802 | 0.358 | 0.217 |          |       |  |     | <i>ASS1</i>       | 5'UTR   |
| cg27624826 | 2  | 131,010,647 | 7.62E-08 | 0.358 | 0.317 |          |       |  |     |                   |         |
| cg27545367 | 6  | 30,711,644  | 5.68E-22 | 0.358 | 0.359 |          |       |  |     | <i>IER3</i>       | 3'UTR   |
| cg06341027 | 6  | 21,667,407  | 1.03E-20 | 0.358 | 0.307 |          |       |  |     | <i>FLJ22536</i>   | Body    |
| cg14479889 | 5  | 112,073,426 | 0.002772 | 0.358 | 0.180 |          |       |  |     | <i>APC</i>        | TSS200  |
| cg15229275 | 19 | 46,800,054  | 6.38E-40 | 0.358 | 0.360 |          |       |  |     | <i>HIF3A</i>      | TSS1500 |
| cg01167755 | 5  | 139,284,498 | 6.33E-07 | 0.358 | 0.405 |          |       |  |     | <i>NRG2</i>       | Body    |
| cg25344503 | 10 | 47,083,398  | 0.000459 | 0.358 | 0.170 |          |       |  |     | <i>PPYR1</i>      | TSS200  |
| cg23634087 | 20 | 50,721,797  | 2E-05    | 0.358 | 0.351 |          |       |  |     | <i>ZFP64</i>      | Body    |
| cg15016771 | 2  | 235,403,218 | 1.96E-11 | 0.358 | 0.379 |          |       |  |     | <i>ARL4C</i>      | 3'UTR   |
| cg03567358 | 11 | 71,050,535  | 7.8E-21  | 0.358 | 0.356 |          |       |  |     |                   |         |
| cg11872300 | 19 | 42,785,225  | 0.000452 | 0.358 | 0.295 |          |       |  |     |                   |         |
| cg05774229 | 11 | 76,033,097  | 5.55E-10 | 0.358 | 0.341 |          |       |  |     |                   |         |
| cg22454011 | 18 | 13,611,439  | 1.33E-05 | 0.358 | 0.315 |          |       |  | Yes | <i>C18orf1</i>    | TSS1500 |
| cg11309496 | 17 | 33,701,353  | 0.000442 | 0.358 | 0.446 |          |       |  |     | <i>SLFN11</i>     | TSS1500 |
| cg13662569 | 4  | 186,577,902 | 4.05E-09 | 0.358 | 0.351 |          |       |  |     | <i>SORBS2</i>     | 1stExon |
| cg03086235 | 8  | 10,586,796  | 7.08E-14 | 0.358 | 0.341 |          |       |  |     | <i>SOX7</i>       | Body    |
| cg08504812 | 3  | 157,260,627 | 1.94E-06 | 0.358 | 0.373 |          |       |  |     | <i>C3orf55</i>    | TSS1500 |
| cg11694519 | 11 | 111,783,563 | 3.9E-06  | 0.358 | 0.346 |          |       |  |     | <i>CRYAB</i>      | TSS1500 |
| cg12601757 | 1  | 76,540,465  | 1.92E-05 | 0.358 | 0.348 | 3.15E-30 | 0.283 |  |     | <i>ST6GALNAC3</i> | 1stExon |
| cg02878891 | 2  | 102,090,444 | 0.048249 | 0.358 | 0.174 |          |       |  |     | <i>RFX8</i>       | 5'UTR   |
| cg07080050 | 12 | 54,413,345  | 4.79E-07 | 0.358 | 0.318 |          |       |  |     | <i>HOXC4</i>      | 5'UTR   |
| cg11670789 | 15 | 93,208,459  | 0.001459 | 0.357 | 0.257 |          |       |  |     |                   |         |
| cg13350478 | X  | 20,286,613  | 6.74E-25 | 0.357 | 0.343 |          |       |  |     |                   |         |
| cg17651959 | 20 | 21,498,100  | 6.34E-07 | 0.357 | 0.309 |          |       |  |     |                   |         |
| cg26757221 | 17 | 21,477,761  | 9.78E-08 | 0.357 | 0.334 |          |       |  |     |                   |         |
| cg02958263 | 1  | 174,769,548 | 8.95E-08 | 0.357 | 0.290 |          |       |  |     | <i>RABGAP1L</i>   | Body    |
| cg23506042 | 5  | 50,262,673  | 3.11E-13 | 0.357 | 0.322 |          |       |  |     |                   |         |
| cg12534150 | 5  | 112,073,613 | 0.006243 | 0.357 | 0.211 |          |       |  |     | <i>APC</i>        | 1stExon |
| cg11867546 | 6  | 29,974,810  | 1.09E-09 | 0.357 | 0.353 |          |       |  |     | <i>HLA-J</i>      | Body    |
| cg14615768 | 17 | 8,924,093   | 1.28E-06 | 0.357 | 0.261 |          |       |  |     | <i>NTN1</i>       | TSS1500 |
| cg01780009 | 17 | 80,944,193  | 5.3E-21  | 0.357 | 0.356 |          |       |  |     | <i>B3GNTL1</i>    | Body    |
| cg23558337 | 20 | 10,492,394  | 7.44E-10 | 0.357 | 0.346 |          |       |  |     | <i>C20orf94</i>   | Body    |
| cg04679712 | 8  | 25,898,839  | 1.72E-09 | 0.357 | 0.350 |          |       |  |     | <i>EBF2</i>       | Body    |

|            |    |             |          |       |       |          |       |  |                  |         |
|------------|----|-------------|----------|-------|-------|----------|-------|--|------------------|---------|
| cg16003256 | 1  | 116,710,945 | 1.69E-05 | 0.357 | 0.366 |          |       |  |                  |         |
| cg27579711 | 6  | 26,172,931  | 4.17E-07 | 0.357 | 0.398 |          |       |  |                  |         |
| cg13484546 | 1  | 16,084,939  | 0.000193 | 0.357 | 0.408 |          |       |  | <i>FBLIM1</i>    | TSS1500 |
| cg00192031 | 7  | 47,620,790  | 9.78E-15 | 0.357 | 0.296 |          |       |  |                  |         |
| cg24511404 | 1  | 212,607,111 | 2.71E-28 | 0.357 | 0.327 |          |       |  | <i>NENF</i>      | Body    |
| cg25019989 | 4  | 54,961,835  | 7.79E-16 | 0.357 | 0.351 |          |       |  |                  |         |
| cg02454806 | 14 | 42,075,554  | 1.36E-11 | 0.357 | 0.366 |          |       |  | <i>LRFN5</i>     | TSS1500 |
| cg19630689 | 14 | 94,984,381  | 2.31E-10 | 0.357 | 0.333 | 9.07E-21 | 0.253 |  | <i>SERPINA12</i> | TSS1500 |
| cg21532325 | 7  | 151,107,400 | 7.67E-05 | 0.357 | 0.369 |          |       |  | <i>WDR86</i>     | TSS1500 |
| cg04850731 | 12 | 57,618,943  | 5.54E-08 | 0.357 | 0.356 |          |       |  | <i>NXPH4</i>     | Body    |
| cg06346505 | 10 | 116,164,640 | 4.28E-15 | 0.357 | 0.309 |          |       |  | <i>AFAP1L2</i>   | TSS200  |
| cg21211367 | 2  | 162,094,118 | 1.13E-33 | 0.357 | 0.325 |          |       |  |                  |         |
| cg13550694 | 9  | 73,835      | 0.000233 | 0.357 | 0.378 |          |       |  |                  |         |
| cg23452969 | 11 | 62,691,182  | 6.55E-13 | 0.357 | 0.326 |          |       |  |                  |         |
| cg02298094 | 12 | 111,844,676 | 1.8E-18  | 0.357 | 0.341 |          |       |  | <i>SH2B3</i>     | 5'UTR   |
| cg02561912 | 20 | 50,158,202  | 6.69E-10 | 0.357 | 0.361 |          |       |  | <i>NFATC2</i>    | Body    |
| cg17028443 | X  | 3,630,086   | 5.97E-15 | 0.357 | 0.344 |          |       |  | <i>PRKX</i>      | Body    |
| cg21383810 | 12 | 65,515,470  | 8.58E-05 | 0.357 | 0.371 |          |       |  | <i>WIF1</i>      | TSS1500 |
| cg08881019 | 1  | 156,096,178 | 7.02E-24 | 0.357 | 0.358 |          |       |  | <i>LMNA</i>      | Body    |
| cg10901633 | 3  | 4,814,459   | 1.78E-12 | 0.357 | 0.331 |          |       |  | <i>ITPR1</i>     | Body    |
| cg27363327 | 6  | 43,211,208  | 0.034184 | 0.357 | 0.416 |          |       |  | <i>TTBK1</i>     | TSS200  |
| cg20857709 | 2  | 43,019,727  | 0.014209 | 0.357 | 0.163 |          |       |  | <i>HAAO</i>      | 5'UTR   |
| cg23740652 | 7  | 157,561,925 | 4.88E-22 | 0.357 | 0.350 |          |       |  | <i>PTPRN2</i>    | Body    |
| cg00299943 | 22 | 41,613,692  | 2.17E-24 | 0.357 | 0.347 |          |       |  | <i>L3MBTL2</i>   | Body    |
| cg23887396 | 17 | 26,699,551  | 0.000249 | 0.357 | 0.248 | 1.15E-08 | 0.172 |  | <i>SARM1</i>     | Body    |
| cg08309809 | 8  | 22,960,572  | 0.007245 | 0.357 | 0.263 |          |       |  | <i>TNFRSF10C</i> | 5'UTR   |
| cg14451382 | 5  | 1,876,397   | 5.33E-19 | 0.357 | 0.305 |          |       |  |                  |         |
| cg17221758 | 8  | 30,243,241  | 3.18E-10 | 0.357 | 0.298 |          |       |  | <i>RBPMS</i>     | Body    |
| cg12783776 | 11 | 57,365,948  | 7.94E-13 | 0.357 | 0.335 | 4.5E-17  | 0.246 |  | <i>SERPING1</i>  | Body    |
| cg23719318 | 2  | 20,865,651  | 1.69E-05 | 0.357 | 0.388 |          |       |  | <i>GDF7</i>      | TSS1500 |
| cg01074657 | 1  | 78,511,466  | 0.000112 | 0.357 | 0.344 |          |       |  | <i>GIPC2</i>     | TSS200  |
| cg16761581 | 14 | 24,803,807  | 0.00015  | 0.357 | 0.383 | 3.3E-20  | 0.259 |  | <i>ADCY4</i>     | 1stExon |
| cg27268352 | 10 | 30,387,860  | 2.22E-10 | 0.357 | 0.393 |          |       |  |                  |         |
| cg18443437 | 5  | 3,326,731   | 3.73E-05 | 0.357 | 0.299 |          |       |  |                  |         |

|            |    |             |          |       |       |          |       |  |                 |         |
|------------|----|-------------|----------|-------|-------|----------|-------|--|-----------------|---------|
| cg26986180 | 12 | 124,246,525 | 0.001904 | 0.356 | 0.127 |          |       |  | <i>DNAH10</i>   | TSS1500 |
| cg23060872 | 2  | 71,205,685  | 0.023996 | 0.356 | 0.431 |          |       |  | <i>ANKRD53</i>  | 1stExon |
| cg20486569 | 22 | 19,512,228  | 5.58E-06 | 0.356 | 0.309 |          |       |  | <i>CLDN5</i>    | 1stExon |
| cg08815398 | 12 | 65,218,869  | 1.43E-24 | 0.356 | 0.336 |          |       |  |                 |         |
| cg15140465 | 11 | 77,184,194  | 8.18E-06 | 0.356 | 0.289 |          |       |  | <i>PAK1</i>     | 5'UTR   |
| cg07732143 | 6  | 36,807,193  | 1.57E-12 | 0.356 | 0.341 |          |       |  | <i>CPNE5</i>    | 1stExon |
| cg10705306 | 8  | 37,337,009  | 4.69E-10 | 0.356 | 0.347 |          |       |  |                 |         |
| cg21511941 | 15 | 72,489,609  | 3.89E-22 | 0.356 | 0.317 |          |       |  | <i>GRAMD2</i>   | Body    |
| cg23445461 | 5  | 140,864,733 | 9.06E-07 | 0.356 | 0.353 |          |       |  | <i>PCDHGA4</i>  | Body    |
| cg03587557 | 6  | 31,831,553  | 5.02E-06 | 0.356 | 0.341 |          |       |  | <i>NEU1</i>     | TSS1500 |
| cg09676684 | 11 | 61,062,962  | 3.16E-17 | 0.356 | 0.300 |          |       |  | <i>VWCE</i>     | TSS200  |
| cg13397632 | X  | 106,750,861 | 2E-08    | 0.356 | 0.391 |          |       |  |                 |         |
| cg17322044 | 12 | 125,140,105 | 1.65E-10 | 0.356 | 0.387 |          |       |  |                 |         |
| cg07128973 | 2  | 130,901,432 | 1.4E-20  | 0.356 | 0.372 |          |       |  | <i>CCDC74B</i>  | Body    |
| cg13651986 | 2  | 175,548,447 | 8.07E-20 | 0.356 | 0.288 |          |       |  | <i>WIPF1</i>    | TSS1500 |
| cg15951557 | 5  | 137,610,421 | 0.003928 | 0.356 | 0.274 |          |       |  | <i>GFRA3</i>    | TSS200  |
| cg24686074 | 10 | 102,497,666 | 0.000409 | 0.356 | 0.389 |          |       |  |                 |         |
| cg25683325 | 1  | 158,151,058 | 0.000137 | 0.356 | 0.401 |          |       |  | <i>CD1D</i>     | Body    |
| cg23251761 | 1  | 9,750,061   | 2.33E-11 | 0.356 | 0.341 |          |       |  | <i>PIK3CD</i>   | 5'UTR   |
| cg05119057 | 14 | 29,255,119  | 0.00033  | 0.356 | 0.307 |          |       |  | <i>C14orf23</i> | Body    |
| cg20143092 | 11 | 35,160,330  | 8.15E-05 | 0.356 | 0.409 | 4.07E-25 | 0.239 |  | <i>CD44</i>     | TSS200  |
| cg17501823 | 12 | 47,219,793  | 7.92E-07 | 0.356 | 0.241 |          |       |  | <i>SLC38A4</i>  | TSS200  |
| cg09590068 | 12 | 54,400,494  | 1.56E-20 | 0.356 | 0.316 |          |       |  |                 |         |
| cg21323637 | X  | 153,600,494 | 2.9E-11  | 0.356 | 0.316 |          |       |  | <i>FLNA</i>     | 5'UTR   |
| cg26195683 | 5  | 1,667,958   | 6.33E-11 | 0.356 | 0.327 |          |       |  |                 |         |
| cg17399362 | 19 | 15,343,345  | 0.010845 | 0.356 | 0.419 |          |       |  | <i>EPHX3</i>    | 5'UTR   |
| cg00491927 | 3  | 120,003,642 | 4.17E-07 | 0.356 | 0.291 |          |       |  |                 |         |
| cg21849932 | 20 | 62,369,462  | 0.004499 | 0.356 | 0.366 |          |       |  | <i>LIME1</i>    | Body    |
| cg10703826 | 1  | 119,532,116 | 6.76E-06 | 0.356 | 0.395 |          |       |  | <i>TBX15</i>    | 1stExon |
| cg23497752 | X  | 153,598,077 | 0.000117 | 0.356 | 0.353 |          |       |  | <i>FLNA</i>     | Body    |
| cg04608177 | 20 | 37,230,389  | 1.12E-41 | 0.356 | 0.360 |          |       |  | <i>C20orf95</i> | TSS200  |
| cg18753440 | 7  | 63,955,786  | 3.09E-12 | 0.356 | 0.322 |          |       |  |                 |         |
| cg07160871 | 2  | 221,969,259 | 0.00014  | 0.355 | 0.384 |          |       |  |                 |         |
| cg11359133 | 2  | 176,948,699 | 0.018257 | 0.355 | 0.416 |          |       |  | <i>EVX2</i>     | TSS200  |



|            |    |             |          |       |       |          |       |  |                 |         |
|------------|----|-------------|----------|-------|-------|----------|-------|--|-----------------|---------|
| cg14539231 | 13 | 43,566,262  | 1.24E-05 | 0.355 | 0.357 | 1.54E-22 | 0.279 |  | <i>EPSTI1</i>   | 1stExon |
| cg20483324 | 13 | 46,189,838  | 0.000268 | 0.355 | 0.394 |          |       |  | <i>FAM194B</i>  | 5'UTR   |
| cg19307528 | 8  | 74,004,928  | 1.11E-07 | 0.355 | 0.417 |          |       |  | <i>C8orf84</i>  | Body    |
| cg10748765 | 20 | 3,218,905   | 4.03E-06 | 0.355 | 0.300 |          |       |  | <i>SLC4A11</i>  | TSS1500 |
| cg14550611 | 19 | 41,354,682  | 4.74E-10 | 0.355 | 0.341 |          |       |  | <i>CYP2A6</i>   | Body    |
| cg22774472 | 2  | 190,044,636 | 6.29E-11 | 0.355 | 0.352 | 6.15E-31 | 0.234 |  | <i>COL5A2</i>   | TSS200  |
| cg00663077 | 4  | 188,916,709 | 3.78E-06 | 0.355 | 0.345 |          |       |  | <i>ZFP42</i>    | TSS1500 |
| cg12100791 | 16 | 31,214,417  | 6.82E-21 | 0.355 | 0.285 | 1.32E-23 | 0.202 |  | <i>PYCARD</i>   | TSS200  |
| cg22176324 | 1  | 24,648,851  | 7.16E-11 | 0.355 | 0.386 |          |       |  | <i>GRHL3</i>    | TSS1500 |
| cg22719241 | 19 | 36,524,058  | 1.8E-08  | 0.355 | 0.316 |          |       |  | <i>CLIP3</i>    | TSS1500 |
| cg17741501 | 15 | 29,077,493  | 0.000263 | 0.355 | 0.395 |          |       |  |                 |         |
| cg10864074 | 7  | 100,318,194 | 0.017469 | 0.355 | 0.189 |          |       |  | <i>EPO</i>      | TSS1500 |
| cg14777342 | 12 | 57,480,090  | 6.51E-10 | 0.355 | 0.397 |          |       |  |                 |         |
| cg01283834 | 4  | 141,488,964 | 0.000515 | 0.355 | 0.300 |          |       |  | <i>UCP1</i>     | Body    |
| cg02502361 | 9  | 135,117,928 | 1.15E-11 | 0.355 | 0.341 |          |       |  | <i>NTNG2</i>    | 3'UTR   |
| cg07017114 | 6  | 29,855,465  | 2.73E-13 | 0.355 | 0.365 |          |       |  | <i>HLA-H</i>    | Body    |
| cg10677787 | 14 | 24,457,893  | 4.1E-12  | 0.355 | 0.328 | 9.63E-25 | 0.143 |  | <i>DHRS4L2</i>  | TSS200  |
| cg01711160 | 14 | 85,996,499  | 1.15E-06 | 0.355 | 0.317 |          |       |  | <i>FLRT2</i>    | 1stExon |
| cg13656173 | 9  | 139,002,093 | 1.22E-18 | 0.355 | 0.344 |          |       |  |                 |         |
| cg05355225 | 8  | 86,350,568  | 1.48E-10 | 0.355 | 0.323 |          |       |  | <i>CA3</i>      | TSS1500 |
| cg19300568 | 4  | 2,060,112   | 3.44E-05 | 0.355 | 0.236 |          |       |  | <i>NAT8L</i>    | TSS1500 |
| cg25680628 | 10 | 30,724,274  | 5.14E-05 | 0.355 | 0.320 |          |       |  | <i>MAP3K8</i>   | 5'UTR   |
| cg18103730 | 14 | 88,458,917  | 0.000868 | 0.355 | 0.253 |          |       |  | <i>GALC</i>     | Body    |
| cg27011480 | 6  | 30,228,083  | 0.002293 | 0.355 | 0.272 |          |       |  | <i>HLA-L</i>    | Body    |
| cg02074274 | 21 | 45,178,331  | 1.28E-12 | 0.355 | 0.371 |          |       |  | <i>PDXK</i>     | 3'UTR   |
| cg18252616 | 13 | 22,243,392  | 2.39E-11 | 0.355 | 0.303 |          |       |  |                 |         |
| cg05259508 | 12 | 115,124,838 | 6.07E-09 | 0.355 | 0.303 |          |       |  |                 |         |
| cg10972873 | 1  | 200,007,592 | 1.42E-08 | 0.355 | 0.377 |          |       |  | <i>NR5A2</i>    | Body    |
| cg14666564 | 2  | 177,030,228 | 5.98E-07 | 0.355 | 0.303 |          |       |  | <i>HOXD3</i>    | 5'UTR   |
| cg11690979 | 1  | 151,694,320 | 3.33E-06 | 0.355 | 0.321 |          |       |  | <i>C1orf230</i> | Body    |
| cg08231349 | 6  | 29,894,644  | 3.26E-08 | 0.355 | 0.319 |          |       |  | <i>HCG4P6</i>   | TSS1500 |
| cg00858599 | 20 | 3,220,929   | 5.76E-17 | 0.355 | 0.300 |          |       |  |                 |         |
| cg14035860 | 14 | 55,707,715  | 2.37E-10 | 0.355 | 0.357 |          |       |  |                 |         |
| cg24914355 | 2  | 176,959,229 | 2.46E-05 | 0.355 | 0.391 |          |       |  | <i>HOXD13</i>   | Body    |

|            |    |             |          |       |       |  |  |  |                  |         |
|------------|----|-------------|----------|-------|-------|--|--|--|------------------|---------|
| cg27179041 | 3  | 61,889,812  | 1.43E-20 | 0.355 | 0.357 |  |  |  | <i>PTPRG</i>     | Body    |
| cg09187007 | 1  | 3,514,990   | 9.27E-08 | 0.355 | 0.382 |  |  |  | <i>MEGF6</i>     | Body    |
| cg02283485 | 10 | 81,003,020  | 0.000443 | 0.355 | 0.309 |  |  |  | <i>ZMIZ1</i>     | Body    |
| cg03002352 | 2  | 17,699,688  | 0.000946 | 0.355 | 0.368 |  |  |  | <i>RAD51AP2</i>  | 1stExon |
| cg11511777 | 2  | 219,725,959 | 4.34E-33 | 0.355 | 0.351 |  |  |  | <i>WNT6</i>      | Body    |
| cg14603098 | 17 | 32,484,259  | 0.000398 | 0.355 | 0.405 |  |  |  | <i>ACCN1</i>     | TSS1500 |
| cg06385583 | 2  | 12,596,843  | 1.6E-05  | 0.354 | 0.371 |  |  |  |                  |         |
| cg06637517 | 3  | 52,407,344  | 0.000004 | 0.354 | 0.361 |  |  |  | <i>DNAH1</i>     | Body    |
| cg27172557 | 14 | 91,012,362  | 6.5E-22  | 0.354 | 0.334 |  |  |  | <i>TTC7B</i>     | Body    |
| cg26761826 | 8  | 67,419,572  | 2.05E-17 | 0.354 | 0.380 |  |  |  | <i>C8orf46</i>   | Body    |
| cg18695839 | 12 | 54,446,944  | 5.17E-08 | 0.354 | 0.294 |  |  |  | <i>HOXC4</i>     | 5'UTR   |
| cg26906273 | 1  | 39,547,881  | 2.94E-06 | 0.354 | 0.317 |  |  |  | <i>MACF1</i>     | 5'UTR   |
| cg03947979 | 6  | 78,176,785  | 2.02E-05 | 0.354 | 0.326 |  |  |  |                  |         |
| cg11321459 | 7  | 18,535,263  | 0.000156 | 0.354 | 0.306 |  |  |  | <i>HDAC9</i>     | TSS1500 |
| cg07119434 | 1  | 151,103,642 | 3.27E-06 | 0.354 | 0.307 |  |  |  |                  |         |
| cg08614290 | 7  | 158,938,491 | 1.06E-21 | 0.354 | 0.343 |  |  |  | <i>VIPR2</i>     | TSS1500 |
| cg16179521 | 15 | 102,009,894 | 9.15E-18 | 0.354 | 0.333 |  |  |  | <i>PCSK6</i>     | Body    |
| cg07118796 | 3  | 126,892,022 | 1.68E-07 | 0.354 | 0.329 |  |  |  |                  |         |
| cg18519308 | 5  | 33,892,621  | 5.14E-14 | 0.354 | 0.332 |  |  |  | <i>ADAMTS12</i>  | TSS1500 |
| cg00700485 | 20 | 44,098,223  | 1.62E-06 | 0.354 | 0.237 |  |  |  | <i>WFDC2</i>     | TSS200  |
| cg06745944 | 12 | 124,246,391 | 0.000163 | 0.354 | 0.144 |  |  |  | <i>DNAH10</i>    | TSS1500 |
| cg06594281 | 17 | 73,083,692  | 0.000499 | 0.354 | 0.180 |  |  |  | <i>SLC16A5</i>   | TSS1500 |
| cg26574003 | 1  | 150,186,289 | 0.00027  | 0.354 | 0.245 |  |  |  |                  |         |
| cg26837800 | 1  | 56,842,338  | 3.36E-21 | 0.354 | 0.344 |  |  |  |                  |         |
| cg15826897 | 19 | 15,343,373  | 0.000344 | 0.354 | 0.397 |  |  |  | <i>EPHX3</i>     | 5'UTR   |
| cg03854238 | 6  | 22,071,933  | 1.71E-24 | 0.354 | 0.317 |  |  |  | <i>FLJ22536</i>  | Body    |
| cg24613080 | 17 | 32,484,035  | 7.1E-17  | 0.354 | 0.388 |  |  |  | <i>ACCN1</i>     | TSS1500 |
| cg06498232 | 3  | 72,227,063  | 5E-14    | 0.354 | 0.357 |  |  |  |                  |         |
| cg26998850 | 16 | 50,300,322  | 1.36E-18 | 0.354 | 0.334 |  |  |  |                  |         |
| cg10088041 | 15 | 45,670,872  | 7.9E-07  | 0.354 | 0.364 |  |  |  | <i>LOC145663</i> | TSS200  |
| cg03940848 | 1  | 229,543,112 | 0.004051 | 0.354 | 0.372 |  |  |  |                  |         |
| cg08780711 | 17 | 6,560,593   | 4.73E-07 | 0.354 | 0.362 |  |  |  |                  |         |
| cg20708842 | 5  | 127,875,163 | 7.84E-05 | 0.354 | 0.365 |  |  |  | <i>FBN2</i>      | TSS1500 |
| cg14226182 | 3  | 158,450,251 | 0.011779 | 0.354 | 0.143 |  |  |  | <i>RARRES1</i>   | 5'UTR   |

|            |    |             |          |       |       |  |  |  |                 |         |
|------------|----|-------------|----------|-------|-------|--|--|--|-----------------|---------|
| cg01390574 | 7  | 129,425,451 | 4.68E-07 | 0.354 | 0.360 |  |  |  |                 |         |
| cg17298973 | 6  | 2,876,494   | 3.82E-15 | 0.354 | 0.290 |  |  |  |                 |         |
| cg06438517 | 1  | 16,861,620  | 1.94E-11 | 0.354 | 0.330 |  |  |  |                 |         |
| cg25417766 | 19 | 52,191,468  | 1.03E-12 | 0.354 | 0.313 |  |  |  |                 |         |
| cg17390301 | 11 | 111,250,093 | 0.000206 | 0.354 | 0.353 |  |  |  | <i>POU2AF1</i>  | 1stExon |
| cg01434608 | 16 | 66,637,927  | 0.035352 | 0.354 | 0.116 |  |  |  | <i>CMTM3</i>    | TSS1500 |
| cg12045337 | 2  | 171,572,714 | 0.019992 | 0.354 | 0.371 |  |  |  | <i>SP5</i>      | Body    |
| cg06829830 | 5  | 80,256,087  | 4.24E-06 | 0.354 | 0.292 |  |  |  | <i>RASGRF2</i>  | TSS1500 |
| cg09445472 | 10 | 7,709,962   | 2.47E-11 | 0.354 | 0.378 |  |  |  | <i>ITIH5</i>    | TSS1500 |
| cg10122865 | 2  | 63,284,132  | 1.77E-06 | 0.354 | 0.358 |  |  |  | <i>OTX1</i>     | 3'UTR   |
| cg07976064 | 11 | 120,435,056 | 0.013423 | 0.354 | 0.226 |  |  |  |                 |         |
| cg00494337 | 20 | 30,194,024  | 0.010189 | 0.354 | 0.319 |  |  |  | <i>ID1</i>      | 3'UTR   |
| cg19869037 | 6  | 116,732,515 | 2.9E-10  | 0.354 | 0.385 |  |  |  | <i>DSE</i>      | Body    |
| cg12042113 | 15 | 90,039,913  | 6.05E-10 | 0.354 | 0.356 |  |  |  | <i>RHCG</i>     | TSS200  |
| cg25380021 | 5  | 171,601,682 | 1.49E-20 | 0.354 | 0.331 |  |  |  | <i>STK10</i>    | Body    |
| cg11445094 | 6  | 28,521,837  | 2.51E-07 | 0.354 | 0.362 |  |  |  |                 |         |
| cg04343891 | 4  | 81,106,663  | 0.001218 | 0.354 | 0.344 |  |  |  | <i>PRDM8</i>    | 5'UTR   |
| cg26158950 | 6  | 21,667,166  | 5.2E-10  | 0.354 | 0.305 |  |  |  | <i>FLJ22536</i> | Body    |
| cg01111041 | 6  | 32,121,055  | 1.81E-15 | 0.354 | 0.351 |  |  |  | <i>PPT2</i>     | TSS1500 |
| cg14611152 | 9  | 124,463,026 | 3.88E-20 | 0.354 | 0.317 |  |  |  | <i>DAB2IP</i>   | Body    |
| cg25528916 | 19 | 4,328,818   | 2.2E-07  | 0.354 | 0.356 |  |  |  | <i>STAP2</i>    | Body    |
| cg12710510 | 12 | 3,862,497   | 0.036062 | 0.354 | 0.222 |  |  |  | <i>EFCAB4B</i>  | TSS200  |
| cg12638737 | 1  | 204,120,607 | 1.52E-11 | 0.353 | 0.279 |  |  |  | <i>ETNK2</i>    | Body    |
| cg22877509 | 1  | 155,290,607 | 1.78E-05 | 0.353 | 0.337 |  |  |  | <i>RUSC1</i>    | TSS200  |
| cg17918002 | 10 | 28,035,719  | 4.72E-13 | 0.353 | 0.378 |  |  |  | <i>MKX</i>      | TSS1500 |
| cg25440893 | 15 | 35,091,802  | 1.96E-15 | 0.353 | 0.281 |  |  |  |                 |         |
| cg25236484 | X  | 51,139,247  | 0.020496 | 0.353 | 0.368 |  |  |  |                 |         |
| cg14817655 | 4  | 188,916,724 | 3.68E-08 | 0.353 | 0.321 |  |  |  | <i>ZFP42</i>    | TSS200  |
| cg19997502 | 2  | 208,492,057 | 0.002578 | 0.353 | 0.366 |  |  |  |                 |         |
| cg20543681 | 20 | 642,673     | 5.05E-07 | 0.353 | 0.354 |  |  |  | <i>SCRT2</i>    | 3'UTR   |
| cg02022733 | 5  | 140,864,578 | 1.01E-09 | 0.353 | 0.346 |  |  |  | <i>PCDHGA4</i>  | Body    |
| cg10032668 | 4  | 187,065,417 | 1.66E-07 | 0.353 | 0.247 |  |  |  | <i>FAM149A</i>  | TSS1500 |
| cg09397246 | 15 | 91,427,361  | 2.12E-15 | 0.353 | 0.349 |  |  |  | <i>FES</i>      | TSS1500 |
| cg07014523 | 20 | 50,721,313  | 2.32E-15 | 0.353 | 0.353 |  |  |  | <i>ZFP64</i>    | Body    |

|            |    |             |          |       |       |          |       |  |                   |         |
|------------|----|-------------|----------|-------|-------|----------|-------|--|-------------------|---------|
| cg10882304 | 10 | 123,923,099 | 3.47E-31 | 0.353 | 0.354 |          |       |  | <i>TACC2</i>      | Body    |
| cg05963821 | 3  | 115,377,939 | 0.002977 | 0.353 | 0.267 |          |       |  | <i>GAP43</i>      | Body    |
| cg03962527 | 10 | 111,766,879 | 7.07E-17 | 0.353 | 0.344 |          |       |  | <i>ADD3</i>       | 5'UTR   |
| cg20485874 | 7  | 102,553,437 | 1.28E-31 | 0.353 | 0.324 |          |       |  | <i>LRRRC17</i>    | 5'UTR   |
| cg08269389 | 1  | 181,074,009 | 0.008348 | 0.353 | 0.132 |          |       |  |                   |         |
| cg27569446 | 3  | 50,378,431  | 1.83E-07 | 0.353 | 0.343 |          |       |  | <i>RASSF1</i>     | TSS200  |
| cg03280622 | 8  | 145,023,013 | 2E-10    | 0.353 | 0.307 |          |       |  | <i>PLEC1</i>      | Body    |
| cg12242450 | 6  | 10,555,808  | 1.58E-06 | 0.353 | 0.361 |          |       |  | <i>GCNT2</i>      | TSS200  |
| cg14776321 | 10 | 27,220,441  | 7.23E-08 | 0.353 | 0.325 |          |       |  | <i>NCRNA00202</i> | Body    |
| cg16529477 | 2  | 223,164,854 | 2.64E-05 | 0.353 | 0.387 |          |       |  | <i>PAX3</i>       | TSS1500 |
| cg09501687 | 5  | 150,169,781 | 3.87E-19 | 0.353 | 0.350 |          |       |  | <i>C5orf62</i>    | Body    |
| cg14663177 | 2  | 38,373,737  | 2.3E-07  | 0.353 | 0.344 |          |       |  | <i>C2orf58</i>    | Body    |
| cg13331550 | 1  | 151,118,416 | 5.03E-09 | 0.353 | 0.332 |          |       |  | <i>SEMA6C</i>     | 5'UTR   |
| cg07113642 | 20 | 2,781,262   | 0.004529 | 0.353 | 0.226 |          |       |  | <i>CPXM1</i>      | 5'UTR   |
| cg01749491 | 2  | 176,948,693 | 0.025036 | 0.353 | 0.432 |          |       |  | <i>EVX2</i>       | TSS200  |
| cg01647632 | 15 | 89,438,905  | 1.29E-77 | 0.353 | 0.333 |          |       |  | <i>HAPLN3</i>     | TSS200  |
| cg12739419 | 7  | 116,140,593 | 1.31E-40 | 0.353 | 0.322 |          |       |  | <i>CAV2</i>       | Body    |
| cg00257296 | 12 | 120,799,373 | 1.19E-24 | 0.353 | 0.341 |          |       |  | <i>MSI1</i>       | Body    |
| cg22230604 | 1  | 119,870,287 | 5.12E-05 | 0.353 | 0.250 |          |       |  |                   |         |
| cg19596273 | 10 | 30,724,086  | 0.000114 | 0.353 | 0.283 |          |       |  | <i>MAP3K8</i>     | 5'UTR   |
| cg00097146 | 2  | 45,171,818  | 1.23E-07 | 0.353 | 0.340 |          |       |  | <i>SIX3</i>       | Body    |
| cg02990368 | 1  | 204,120,649 | 6.15E-11 | 0.353 | 0.288 |          |       |  | <i>ETNK2</i>      | Body    |
| cg09556700 | 1  | 2,230,668   | 3.21E-15 | 0.353 | 0.367 |          |       |  | <i>SKI</i>        | Body    |
| cg21927177 | 14 | 65,172,436  | 3.02E-26 | 0.353 | 0.355 |          |       |  | <i>PLEKHG3</i>    | 5'UTR   |
| cg13511752 | 10 | 74,094,697  | 1.77E-14 | 0.353 | 0.315 |          |       |  | <i>DNAJB12</i>    | 3'UTR   |
| cg05194726 | 12 | 2,944,480   | 2.08E-06 | 0.353 | 0.212 | 5.51E-12 | 0.214 |  | <i>NRIP2</i>      | TSS1500 |
| cg27182047 | 1  | 110,199,061 | 1.9E-08  | 0.353 | 0.346 |          |       |  | <i>GSTM4</i>      | Body    |
| cg07599133 | 19 | 35,068,628  | 3.04E-11 | 0.353 | 0.327 |          |       |  | <i>LOC643719</i>  | TSS200  |
| cg02453146 | 1  | 53,068,587  | 4.41E-09 | 0.353 | 0.251 |          |       |  | <i>GPX7</i>       | Body    |
| cg00388391 | 1  | 18,459,578  | 1.53E-07 | 0.353 | 0.286 |          |       |  | <i>IGSF21</i>     | Body    |
| cg13800209 | 15 | 37,390,284  | 0.02199  | 0.353 | 0.429 |          |       |  | <i>MEIS2</i>      | 1stExon |
| cg11795854 | 5  | 72,598,965  | 9.77E-05 | 0.353 | 0.338 |          |       |  |                   |         |
| cg10065823 | 9  | 96,108,467  | 8.11E-09 | 0.352 | 0.340 |          |       |  | <i>C9orf129</i>   | 1stExon |
| cg04042468 | 22 | 43,506,033  | 2.92E-15 | 0.352 | 0.315 |          |       |  | <i>BIK</i>        | TSS1500 |

|            |    |             |          |       |       |          |       |     |                 |         |
|------------|----|-------------|----------|-------|-------|----------|-------|-----|-----------------|---------|
| cg23515702 | 2  | 206,673,425 | 7.84E-36 | 0.352 | 0.347 |          |       |     |                 |         |
| cg01861913 | 3  | 61,550,569  | 6.34E-23 | 0.352 | 0.339 |          |       |     | <i>PTPRG</i>    | Body    |
| cg16173191 | 4  | 82,135,607  | 6.25E-05 | 0.352 | 0.272 |          |       |     |                 |         |
| cg26150462 | 10 | 11,206,868  | 5.91E-05 | 0.352 | 0.171 |          |       |     | <i>CUGBP2</i>   | TSS200  |
| cg15143037 | 7  | 75,639,754  | 1.16E-29 | 0.352 | 0.348 |          |       |     | <i>STYXL1</i>   | Body    |
| cg11202265 | 7  | 158,362,907 | 4.04E-15 | 0.352 | 0.347 |          |       |     | <i>PTPRN2</i>   | Body    |
| cg02388378 | 16 | 54,968,727  | 0.00113  | 0.352 | 0.421 |          |       |     |                 |         |
| cg09938227 | 1  | 156,390,124 | 1.92E-11 | 0.352 | 0.374 |          |       |     | <i>C1orf61</i>  | 5'UTR   |
| cg14527439 | 7  | 158,266,198 | 4.57E-23 | 0.352 | 0.348 |          |       |     | <i>PTPRN2</i>   | Body    |
| cg14470895 | 5  | 115,152,431 | 0.002236 | 0.352 | 0.191 |          |       |     | <i>CDO1</i>     | TSS200  |
| cg02681842 | 8  | 145,033,310 | 1.5E-13  | 0.352 | 0.344 |          |       |     | <i>PLEC1</i>    | Body    |
| cg13081720 | 5  | 150,399,890 | 4.04E-05 | 0.352 | 0.191 |          |       |     | <i>GPX3</i>     | TSS200  |
| cg10953487 | 6  | 44,529,157  | 7.31E-14 | 0.352 | 0.302 |          |       |     |                 |         |
| cg27641076 | 11 | 62,211,788  | 2.72E-22 | 0.352 | 0.333 |          |       |     | <i>AHNAK</i>    | Body    |
| cg03563630 | 20 | 37,435,477  | 8.44E-09 | 0.352 | 0.323 |          |       |     | <i>PPP1R16B</i> | 5'UTR   |
| cg10903903 | 6  | 27,647,843  | 0.018644 | 0.352 | 0.369 |          |       |     |                 |         |
| cg18081258 | 14 | 21,494,161  | 3.27E-26 | 0.352 | 0.337 | 1.56E-20 | 0.223 |     | <i>NDRG2</i>    | TSS1500 |
| cg08249424 | 6  | 4,775,222   | 8.38E-07 | 0.352 | 0.268 |          |       |     | <i>CDYL</i>     | TSS1500 |
| cg10866060 | 12 | 83,592,588  | 2.21E-17 | 0.352 | 0.370 |          |       |     |                 |         |
| cg17305266 | 6  | 1,391,265   | 0.002042 | 0.352 | 0.358 |          |       |     | <i>FOXF2</i>    | 1stExon |
| cg18507379 | 5  | 140,787,507 | 0.011127 | 0.352 | 0.469 |          |       |     | <i>PCDHGA4</i>  | Body    |
| cg05003322 | 1  | 32,169,706  | 9.58E-12 | 0.352 | 0.319 |          |       |     | <i>COL16A1</i>  | 1stExon |
| cg01054354 | 15 | 100,272,751 | 2.42E-24 | 0.352 | 0.328 |          |       |     | <i>LYSMD4</i>   | 5'UTR   |
| cg25266629 | 10 | 102,894,148 | 6.84E-05 | 0.352 | 0.349 |          |       |     | <i>TLX1</i>     | Body    |
| cg19111999 | 10 | 17,270,087  | 8.1E-07  | 0.352 | 0.328 |          |       |     | <i>VIM</i>      | TSS200  |
| cg27554954 | 15 | 60,691,595  | 6.82E-28 | 0.352 | 0.346 |          |       |     | <i>ANXA2</i>    | TSS1500 |
| cg24661595 | 11 | 70,456,848  | 1.23E-29 | 0.352 | 0.349 |          |       |     | <i>SHANK2</i>   | Body    |
| cg24013620 | 8  | 144,798,688 | 4.07E-15 | 0.352 | 0.355 |          |       |     | <i>MAPK15</i>   | Body    |
| cg16955889 | 3  | 181,445,647 | 0.000118 | 0.352 | 0.333 |          |       |     | <i>SOX2OT</i>   | Body    |
| cg09820244 | 1  | 54,790,722  | 7.32E-23 | 0.352 | 0.341 |          |       |     | <i>SSBP3</i>    | Body    |
| cg24725263 | 12 | 56,101,328  | 5.59E-24 | 0.352 | 0.312 |          |       | Yes | <i>ITGA7</i>    | 1stExon |
| cg12441967 | 22 | 17,602,561  | 6.49E-16 | 0.352 | 0.283 |          |       |     | <i>CECR6</i>    | TSS1500 |
| cg17017670 | X  | 68,525,613  | 7.55E-07 | 0.352 | 0.329 |          |       |     |                 |         |
| cg25913233 | 5  | 151,066,683 | 2.8E-21  | 0.352 | 0.334 | 6.09E-22 | 0.223 |     | <i>SPARC</i>    | TSS200  |

|            |    |             |          |       |       |          |       |  |                  |         |
|------------|----|-------------|----------|-------|-------|----------|-------|--|------------------|---------|
| cg23483765 | 5  | 156,886,996 | 0.001708 | 0.352 | 0.235 |          |       |  | <i>NIPAL4</i>    | TSS200  |
| cg08135379 | 12 | 47,474,763  | 2.51E-05 | 0.352 | 0.337 |          |       |  | <i>AMIGO2</i>    | TSS1500 |
| cg02063759 | 1  | 119,543,295 | 8.92E-08 | 0.352 | 0.304 |          |       |  |                  |         |
| cg23752752 | 7  | 4,778,908   | 2.25E-32 | 0.352 | 0.335 |          |       |  | <i>FOXK1</i>     | Body    |
| cg07660671 | 8  | 10,586,967  | 6.01E-14 | 0.351 | 0.305 |          |       |  | <i>SOX7</i>      | Body    |
| cg25905674 | 17 | 43,047,856  | 0.028222 | 0.351 | 0.287 |          |       |  |                  |         |
| cg13696283 | 13 | 74,707,153  | 2.38E-05 | 0.351 | 0.398 |          |       |  | <i>KLF12</i>     | 5'UTR   |
| cg14913695 | 22 | 50,449,520  | 1.54E-23 | 0.351 | 0.342 |          |       |  | <i>IL17REL</i>   | 5'UTR   |
| cg10983208 | 10 | 73,848,320  | 4.67E-07 | 0.351 | 0.210 | 4.27E-11 | 0.163 |  | <i>SPOCK2</i>    | 5'UTR   |
| cg19915711 | 13 | 43,566,421  | 0.000311 | 0.351 | 0.347 |          |       |  | <i>EPSTI1</i>    | TSS200  |
| cg03970036 | 2  | 220,174,232 | 0.000343 | 0.351 | 0.441 |          |       |  | <i>PTPRN</i>     | TSS200  |
| cg21739934 | 11 | 116,371,391 | 7.63E-07 | 0.351 | 0.289 |          |       |  |                  |         |
| cg27647152 | 20 | 3,220,985   | 9.62E-24 | 0.351 | 0.318 |          |       |  |                  |         |
| cg07605211 | 1  | 223,538,359 | 0.00115  | 0.351 | 0.183 |          |       |  | <i>SUSD4</i>     | TSS1500 |
| cg07891473 | 3  | 64,670,640  | 3.44E-07 | 0.351 | 0.269 |          |       |  | <i>ADAMTS9</i>   | Body    |
| cg07848310 | 5  | 43,603,786  | 0.018757 | 0.351 | 0.200 |          |       |  | <i>NNT</i>       | 5'UTR   |
| cg11152302 | 14 | 24,867,472  | 7.37E-33 | 0.351 | 0.336 |          |       |  | <i>NYNRIN</i>    | TSS1500 |
| cg07688604 | 12 | 133,065,928 | 0.002783 | 0.351 | 0.273 |          |       |  | <i>FBRSL1</i>    | TSS1500 |
| cg27422722 | 6  | 28,574,662  | 0.000779 | 0.351 | 0.303 |          |       |  |                  |         |
| cg19045644 | 4  | 57,976,756  | 0.022431 | 0.351 | 0.377 |          |       |  | <i>IGFBP7</i>    | TSS1500 |
| cg13879495 | 22 | 22,005,669  | 2.32E-09 | 0.351 | 0.281 |          |       |  |                  |         |
| cg22341310 | 19 | 48,048,583  | 7.38E-14 | 0.351 | 0.349 | 6.23E-18 | 0.224 |  | <i>ZNF541</i>    | Body    |
| cg06145435 | 7  | 1,022,769   | 4.39E-20 | 0.351 | 0.324 |          |       |  | <i>CYP2W1</i>    | TSS200  |
| cg19466563 | 4  | 88,450,506  | 2.21E-21 | 0.351 | 0.333 | 1.12E-27 | 0.236 |  | <i>SPARCL1</i>   | 1stExon |
| cg22616881 | 7  | 96,642,096  | 3.95E-08 | 0.351 | 0.368 |          |       |  | <i>DLX6AS</i>    | Body    |
| cg18328206 | 1  | 206,681,378 | 0.006182 | 0.351 | 0.347 |          |       |  | <i>RASSF5</i>    | 1stExon |
| cg24865779 | 21 | 34,775,042  | 0.005947 | 0.351 | 0.200 |          |       |  | <i>IFNGR2</i>    | TSS200  |
| cg21429394 | 12 | 100,750,899 | 4.79E-09 | 0.351 | 0.290 |          |       |  | <i>SLC17A8</i>   | 1stExon |
| cg19647813 | 13 | 96,296,144  | 1.82E-06 | 0.351 | 0.353 |          |       |  | <i>DZIP1</i>     | 5'UTR   |
| cg22855020 | 8  | 42,356,731  | 5.77E-16 | 0.351 | 0.347 |          |       |  | <i>SLC20A2</i>   | 5'UTR   |
| cg09407917 | X  | 130,192,151 | 8.72E-05 | 0.351 | 0.324 |          |       |  | <i>FLJ30058</i>  | TSS200  |
| cg22645427 | 20 | 25,129,520  | 1.12E-08 | 0.351 | 0.300 |          |       |  | <i>LOC284798</i> | TSS1500 |
| cg19544662 | 2  | 88,752,056  | 0.016403 | 0.351 | 0.167 |          |       |  | <i>FOXI3</i>     | TSS200  |
| cg08314603 | 12 | 81,471,311  | 1.15E-08 | 0.351 | 0.317 |          |       |  | <i>ACSS3</i>     | TSS1500 |

|            |    |             |          |       |       |          |       |  |                 |         |
|------------|----|-------------|----------|-------|-------|----------|-------|--|-----------------|---------|
| cg22535307 | 15 | 48,938,370  | 0.004042 | 0.351 | 0.168 |          |       |  | <i>FBN1</i>     | TSS1500 |
| cg09382127 | 5  | 3,592,466   | 4.01E-11 | 0.351 | 0.365 |          |       |  |                 |         |
| cg15233062 | 12 | 54,447,349  | 3.98E-06 | 0.351 | 0.352 |          |       |  | <i>HOXC4</i>    | 5'UTR   |
| cg25837803 | 1  | 186,649,909 | 0.007882 | 0.351 | 0.309 |          |       |  | <i>PTGS2</i>    | TSS1500 |
| cg02503159 | 6  | 5,026,324   | 0.018534 | 0.351 | 0.371 |          |       |  |                 |         |
| cg01047613 | 20 | 31,446,682  | 4.49E-10 | 0.351 | 0.360 |          |       |  | <i>EFCAB8</i>   | TSS200  |
| cg01029638 | 7  | 120,628,874 | 6.64E-05 | 0.351 | 0.287 |          |       |  | <i>C7orf58</i>  | TSS1500 |
| cg25185173 | 4  | 154,712,580 | 0.003285 | 0.351 | 0.452 |          |       |  |                 |         |
| cg03762694 | 6  | 134,499,419 | 1.81E-11 | 0.351 | 0.360 |          |       |  | <i>SGK1</i>     | Body    |
| cg08714753 | 11 | 35,639,590  | 4.58E-09 | 0.350 | 0.275 |          |       |  | <i>FJX1</i>     | TSS200  |
| cg10106804 | 1  | 35,258,594  | 0.000612 | 0.350 | 0.357 |          |       |  | <i>GJA4</i>     | TSS200  |
| cg21490980 | 12 | 103,311,138 | 0.002304 | 0.350 | 0.190 |          |       |  | <i>PAH</i>      | 5'UTR   |
| cg00764109 | 1  | 114,697,582 | 1.29E-06 | 0.350 | 0.326 |          |       |  | <i>SYT6</i>     | TSS1500 |
| cg01297808 | 10 | 94,180,551  | 2.61E-10 | 0.350 | 0.294 |          |       |  |                 |         |
| cg08260891 | 20 | 44,518,802  | 3.68E-11 | 0.350 | 0.232 | 2.54E-10 | 0.163 |  | <i>CTSA</i>     | TSS1500 |
| cg26607337 | 5  | 145,758,881 | 2.65E-22 | 0.350 | 0.328 |          |       |  |                 |         |
| cg27223047 | 5  | 127,874,825 | 0.000165 | 0.350 | 0.380 | 4.92E-32 | 0.300 |  | <i>FBN2</i>     | TSS1500 |
| cg19309616 | 1  | 41,851,836  | 1.16E-20 | 0.350 | 0.338 |          |       |  |                 |         |
| cg00221185 | 6  | 30,652,268  | 9.52E-12 | 0.350 | 0.370 |          |       |  | <i>KIAA1949</i> | Body    |
| cg10391212 | 4  | 47,840,136  | 1.99E-08 | 0.350 | 0.316 |          |       |  | <i>CORIN</i>    | TSS200  |
| cg16587010 | 3  | 58,523,130  | 3.07E-32 | 0.350 | 0.354 |          |       |  | <i>ACOX2</i>    | TSS1500 |
| cg23274561 | 1  | 156,084,271 | 4.88E-22 | 0.350 | 0.313 |          |       |  | <i>LMNA</i>     | TSS200  |
| cg23391107 | 17 | 45,924,227  | 1.8E-06  | 0.350 | 0.309 |          |       |  | <i>SP6</i>      | 3'UTR   |
| cg18334392 | 5  | 9,547,825   | 4.65E-06 | 0.350 | 0.318 |          |       |  | <i>SNORD123</i> | TSS1500 |
| cg17450733 | 12 | 45,443,875  | 2.45E-32 | 0.350 | 0.330 |          |       |  | <i>DBX2</i>     | Body    |
| cg14164044 | 15 | 89,952,135  | 4.41E-09 | 0.350 | 0.367 |          |       |  |                 |         |
| cg14196395 | 2  | 71,823,517  | 1.24E-07 | 0.350 | 0.265 |          |       |  | <i>DYSF</i>     | Body    |
| cg17101450 | 10 | 102,900,365 | 0.000217 | 0.350 | 0.323 |          |       |  |                 |         |
| cg24896649 | 4  | 188,916,726 | 2.51E-08 | 0.350 | 0.307 |          |       |  | <i>ZFP42</i>    | TSS200  |
| cg22233512 | 17 | 55,543,388  | 6.49E-22 | 0.350 | 0.336 |          |       |  | <i>MSI2</i>     | Body    |
| cg20066496 | 15 | 43,213,993  | 0.000244 | 0.350 | 0.183 |          |       |  | <i>TTBK2</i>    | TSS1500 |
| cg21655480 | X  | 21,677,052  | 1.08E-07 | 0.350 | 0.302 | 8.5E-16  | 0.194 |  | <i>KLHL34</i>   | TSS1500 |
| cg16231923 | 15 | 73,923,634  | 1.69E-08 | 0.350 | 0.321 |          |       |  | <i>NPTN</i>     | Body    |
| cg06568535 | 3  | 29,323,042  | 5.08E-06 | 0.350 | 0.379 |          |       |  | <i>RBMS3</i>    | 1stExon |

|            |    |             |          |       |       |          |       |  |                |         |
|------------|----|-------------|----------|-------|-------|----------|-------|--|----------------|---------|
| cg24862743 | 19 | 2,719,889   | 2.32E-22 | 0.350 | 0.365 |          |       |  | <i>DIRAS1</i>  | 5'UTR   |
| cg26579601 | 10 | 30,724,020  | 7.01E-05 | 0.350 | 0.274 |          |       |  | <i>MAP3K8</i>  | 5'UTR   |
| cg12169365 | 14 | 92,979,709  | 5.31E-07 | 0.350 | 0.265 |          |       |  | <i>RIN3</i>    | TSS1500 |
| cg05315321 | 14 | 68,844,276  | 1.5E-14  | 0.350 | 0.353 |          |       |  | <i>RAD51L1</i> | Body    |
| cg10512203 | 1  | 40,780,905  | 9.07E-16 | 0.350 | 0.327 |          |       |  | <i>COL9A2</i>  | Body    |
| cg25293325 | 17 | 873,413     | 2.16E-17 | 0.350 | 0.336 |          |       |  | <i>NXN</i>     | Body    |
| cg08059845 | 19 | 50,015,975  | 0.000134 | 0.349 | 0.266 |          |       |  | <i>FCGRT</i>   | 5'UTR   |
| cg15132565 | 5  | 72,740,154  | 0.003141 | 0.349 | 0.312 |          |       |  |                |         |
| cg11986813 | 10 | 43,429,144  | 0.001399 | 0.349 | 0.404 |          |       |  |                |         |
| cg12126901 | 1  | 61,623,366  | 2.98E-11 | 0.349 | 0.351 |          |       |  | <i>NFIA</i>    | Body    |
| cg07686872 | 7  | 156,794,879 | 3.44E-09 | 0.349 | 0.362 |          |       |  |                |         |
| cg01906944 | 20 | 45,439,769  | 7.39E-21 | 0.349 | 0.344 |          |       |  |                |         |
| cg26924440 | 1  | 19,276,353  | 5.68E-34 | 0.349 | 0.331 |          |       |  | <i>IFFO2</i>   | Body    |
| cg09127400 | 6  | 30,712,331  | 0.002309 | 0.349 | 0.349 |          |       |  | <i>IER3</i>    | TSS200  |
| cg23189044 | 11 | 74,178,114  | 8.19E-05 | 0.349 | 0.270 | 6.12E-09 | 0.163 |  | <i>KCNE3</i>   | 5'UTR   |
| cg09465698 | 5  | 140,787,623 | 2.03E-07 | 0.349 | 0.413 |          |       |  | <i>PCDHGA4</i> | Body    |
| cg14136420 | 9  | 128,728,906 | 2.15E-22 | 0.349 | 0.307 |          |       |  | <i>PBX3</i>    | Body    |
| cg19769827 | 1  | 203,259,772 | 0.013101 | 0.349 | 0.172 |          |       |  |                |         |
| cg14102988 | 9  | 113,801,337 | 5.69E-06 | 0.349 | 0.263 |          |       |  | <i>LPAR1</i>   | TSS1500 |
| cg15447787 | 15 | 29,967,531  | 4.73E-32 | 0.349 | 0.325 |          |       |  |                |         |
| cg15608277 | 12 | 53,184,086  | 7.86E-06 | 0.349 | 0.410 |          |       |  | <i>KRT3</i>    | Body    |
| cg23561979 | 2  | 42,329,535  | 6.78E-05 | 0.349 | 0.364 |          |       |  |                |         |
| cg13279244 | 7  | 20,838,581  | 1.43E-05 | 0.349 | 0.289 |          |       |  |                |         |
| cg03864000 | 11 | 111,411,381 | 5.77E-05 | 0.349 | 0.330 |          |       |  | <i>LAYN</i>    | 5'UTR   |
| cg20634514 | 1  | 44,703,750  | 3.14E-24 | 0.349 | 0.353 |          |       |  | <i>ERI3</i>    | Body    |
| cg25154801 | 8  | 41,655,826  | 2.04E-10 | 0.349 | 0.297 |          |       |  | <i>ANK1</i>    | TSS1500 |
| cg08229358 | 1  | 179,544,765 | 1.43E-16 | 0.349 | 0.319 |          |       |  | <i>NPHS2</i>   | 1stExon |
| cg10375890 | 1  | 50,892,511  | 0.005611 | 0.349 | 0.421 |          |       |  |                |         |
| cg19074496 | 2  | 220,117,868 | 0.000292 | 0.349 | 0.403 |          |       |  | <i>TUBA4B</i>  | TSS200  |
| cg14999001 | 7  | 45,197,441  | 0.003738 | 0.349 | 0.217 |          |       |  | <i>RAMP3</i>   | 1stExon |
| cg05745631 | 6  | 30,095,178  | 3.68E-35 | 0.349 | 0.348 |          |       |  |                |         |
| cg10608596 | 19 | 11,785,125  | 2.79E-12 | 0.349 | 0.324 |          |       |  | <i>ZNF833</i>  | Body    |
| cg11394785 | 5  | 179,221,090 | 3.95E-34 | 0.349 | 0.330 | 6.79E-23 | 0.179 |  | <i>LTC4S</i>   | 1stExon |
| cg18919225 | 12 | 103,311,494 | 0.000548 | 0.349 | 0.184 |          |       |  | <i>PAH</i>     | TSS200  |



|            |    |             |          |       |       |          |       |  |                 |         |
|------------|----|-------------|----------|-------|-------|----------|-------|--|-----------------|---------|
| cg15797110 | 7  | 27,196,314  | 2.48E-06 | 0.349 | 0.354 |          |       |  | <i>HOXA7</i>    | TSS200  |
| cg01791587 | 1  | 110,693,985 | 1.82E-26 | 0.349 | 0.347 |          |       |  | <i>SLC6A17</i>  | 5'UTR   |
| cg26268276 | 11 | 33,038,313  | 1.03E-17 | 0.349 | 0.368 |          |       |  | <i>DEPDC7</i>   | Body    |
| cg24467291 | 12 | 122,907,814 | 3.11E-16 | 0.349 | 0.334 | 2.71E-33 | 0.264 |  | <i>CLIP1</i>    | TSS1500 |
| cg16032894 | 11 | 30,605,411  | 1.71E-14 | 0.349 | 0.306 |          |       |  | <i>MPPED2</i>   | 5'UTR   |
| cg13337731 | 7  | 73,011,308  | 4.16E-07 | 0.349 | 0.379 |          |       |  | <i>MLXIPL</i>   | Body    |
| cg17347389 | 14 | 51,562,646  | 0.000787 | 0.349 | 0.233 | 1.5E-11  | 0.115 |  | <i>TRIM9</i>    | TSS1500 |
| cg18107232 | 13 | 95,620,997  | 2.87E-06 | 0.349 | 0.331 |          |       |  |                 |         |
| cg00727630 | 20 | 50,721,366  | 5.97E-11 | 0.349 | 0.337 |          |       |  | <i>ZFP64</i>    | Body    |
| cg06264679 | 6  | 32,121,433  | 3.9E-23  | 0.349 | 0.318 |          |       |  | <i>PPT2</i>     | Body    |
| cg10804678 | 3  | 72,788,309  | 5.05E-06 | 0.349 | 0.255 |          |       |  |                 |         |
| cg24595606 | 6  | 108,492,358 | 6.07E-07 | 0.349 | 0.360 |          |       |  | <i>NR2E1</i>    | Body    |
| cg12298268 | 3  | 139,257,866 | 7.67E-10 | 0.349 | 0.351 |          |       |  | <i>RBP1</i>     | Body    |
| cg06329684 | 4  | 140,187,743 | 1.17E-08 | 0.349 | 0.348 |          |       |  | <i>C4orf49</i>  | 3'UTR   |
| cg18783429 | 5  | 92,414,398  | 1.05E-10 | 0.349 | 0.279 |          |       |  |                 |         |
| cg08965235 | 11 | 65,325,158  | 4.9E-05  | 0.348 | 0.252 | 1.81E-37 | 0.278 |  | <i>LTBP3</i>    | 1stExon |
| cg19034038 | 12 | 45,443,996  | 1.67E-27 | 0.348 | 0.313 |          |       |  | <i>DBX2</i>     | Body    |
| cg04108939 | 1  | 45,250,181  | 0.013784 | 0.348 | 0.401 |          |       |  | <i>BEST4</i>    | Body    |
| cg18454685 | 17 | 48,639,239  | 5.43E-07 | 0.348 | 0.323 | 1.12E-24 | 0.227 |  | <i>CACNA1G</i>  | Body    |
| cg13763783 | 10 | 95,517,562  | 2.41E-06 | 0.348 | 0.395 |          |       |  | <i>LGI1</i>     | TSS200  |
| cg16335762 | 16 | 66,637,919  | 0.016261 | 0.348 | 0.122 | 5.23E-10 | 0.151 |  | <i>CMTM3</i>    | TSS1500 |
| cg09704750 | 21 | 27,011,139  | 2.02E-07 | 0.348 | 0.383 |          |       |  | <i>JAM2</i>     | TSS1500 |
| cg13337949 | 6  | 30,711,586  | 1.71E-26 | 0.348 | 0.331 |          |       |  | <i>IER3</i>     | 3'UTR   |
| cg00031256 | 6  | 2,842,255   | 4.29E-06 | 0.348 | 0.336 |          |       |  | <i>SERPINB1</i> | TSS200  |
| cg09671837 | 7  | 143,582,308 | 5.2E-16  | 0.348 | 0.334 |          |       |  | <i>FAM115A</i>  | 5'UTR   |
| cg13453424 | 9  | 98,260,248  | 1.51E-24 | 0.348 | 0.349 |          |       |  | <i>PTCH1</i>    | 5'UTR   |
| cg00363080 | 10 | 1,454,292   | 1.7E-24  | 0.348 | 0.320 |          |       |  | <i>ADARB2</i>   | Body    |
| cg00169617 | 3  | 87,138,700  | 0.000281 | 0.348 | 0.219 |          |       |  |                 |         |
| cg25792593 | 19 | 8,559,219   | 6.04E-25 | 0.348 | 0.327 |          |       |  | <i>PRAM1</i>    | Body    |
| cg15182643 | 5  | 38,257,516  | 9.56E-15 | 0.348 | 0.326 |          |       |  | <i>EGFLAM</i>   | TSS1500 |
| cg10712623 | 3  | 25,469,577  | 6.37E-14 | 0.348 | 0.318 | 3.77E-18 | 0.129 |  | <i>RARB</i>     | TSS1500 |
| cg24335070 | 2  | 179,914,864 | 2.12E-08 | 0.348 | 0.322 |          |       |  |                 |         |
| cg14039306 | 4  | 4,862,240   | 2E-09    | 0.348 | 0.333 |          |       |  | <i>MSX1</i>     | Body    |
| cg11756095 | 1  | 32,410,614  | 2.67E-06 | 0.348 | 0.358 |          |       |  |                 |         |

|            |    |             |          |       |       |  |  |  |                  |         |
|------------|----|-------------|----------|-------|-------|--|--|--|------------------|---------|
| cg04636402 | 5  | 139,284,774 | 4.73E-39 | 0.348 | 0.341 |  |  |  | <i>NRG2</i>      | Body    |
| cg11709405 | 1  | 24,649,398  | 3.96E-15 | 0.348 | 0.365 |  |  |  | <i>GRHL3</i>     | TSS200  |
| cg25433316 | 2  | 10,197,543  | 1.59E-05 | 0.348 | 0.206 |  |  |  | <i>CYS1</i>      | 3'UTR   |
| cg20219035 | 12 | 14,720,858  | 3.83E-07 | 0.348 | 0.230 |  |  |  | <i>PLBD1</i>     | TSS200  |
| cg19906093 | 2  | 191,045,697 | 3.3E-12  | 0.348 | 0.330 |  |  |  | <i>C2orf88</i>   | 5'UTR   |
| cg17480760 | 8  | 86,350,889  | 2.7E-06  | 0.348 | 0.356 |  |  |  | <i>CA3</i>       | TSS200  |
| cg18141830 | 6  | 137,242,085 | 7.85E-09 | 0.348 | 0.373 |  |  |  | <i>SLC35D3</i>   | TSS1500 |
| cg10277365 | X  | 49,022,793  | 1.14E-09 | 0.348 | 0.305 |  |  |  | <i>MAGIX</i>     | 3'UTR   |
| cg02394955 | 10 | 47,083,426  | 0.000373 | 0.348 | 0.179 |  |  |  | <i>PPYR1</i>     | TSS200  |
| cg19929126 | 7  | 28,998,195  | 0.008037 | 0.348 | 0.244 |  |  |  | <i>TRIL</i>      | TSS200  |
| cg12055515 | 2  | 66,735,203  | 2.13E-19 | 0.348 | 0.320 |  |  |  | <i>MEIS1</i>     | Body    |
| cg26296894 | 3  | 20,183,665  | 1.32E-23 | 0.348 | 0.344 |  |  |  | <i>KAT2B</i>     | Body    |
| cg12926938 | 8  | 93,114,150  | 0.000181 | 0.348 | 0.374 |  |  |  |                  |         |
| cg24393055 | 5  | 141,705,521 | 4.58E-07 | 0.348 | 0.247 |  |  |  | <i>SPRY4</i>     | TSS1500 |
| cg24935217 | 11 | 34,517,699  | 5.93E-16 | 0.348 | 0.371 |  |  |  | <i>ELF5</i>      | Body    |
| cg17165580 | 1  | 156,676,581 | 0.000203 | 0.348 | 0.335 |  |  |  | <i>CRABP2</i>    | TSS1500 |
| cg05870108 | X  | 106,749,745 | 1.9E-46  | 0.348 | 0.352 |  |  |  |                  |         |
| cg22396555 | 13 | 28,502,461  | 3.31E-09 | 0.348 | 0.340 |  |  |  |                  |         |
| cg04691781 | 16 | 89,668,842  | 5.72E-11 | 0.348 | 0.303 |  |  |  |                  |         |
| cg10024587 | 10 | 105,211,753 | 3.22E-07 | 0.348 | 0.297 |  |  |  | <i>CALHM2</i>    | 5'UTR   |
| cg20443254 | 12 | 108,169,020 | 1.03E-06 | 0.348 | 0.282 |  |  |  | <i>ASCL4</i>     | 1stExon |
| cg25767345 | 18 | 54,788,969  | 2.64E-12 | 0.348 | 0.318 |  |  |  |                  |         |
| cg08940787 | 17 | 62,777,648  | 0.000468 | 0.348 | 0.259 |  |  |  | <i>LOC146880</i> | Body    |
| cg11142705 | 3  | 42,306,974  | 0.000153 | 0.348 | 0.379 |  |  |  | <i>CCK</i>       | TSS1500 |
| cg22911898 | 11 | 94,473,405  | 2.82E-11 | 0.348 | 0.269 |  |  |  |                  |         |
| cg26560222 | 1  | 50,888,826  | 0.000117 | 0.348 | 0.358 |  |  |  | <i>DMRTA2</i>    | 1stExon |
| cg16304521 | 14 | 22,191,827  | 6.3E-12  | 0.348 | 0.338 |  |  |  |                  |         |
| cg27090201 | 5  | 134,914,717 | 0.002025 | 0.348 | 0.304 |  |  |  | <i>CXCL14</i>    | 5'UTR   |
| cg02043994 | 6  | 15,244,878  | 8.65E-13 | 0.348 | 0.304 |  |  |  |                  |         |
| cg19059495 | 6  | 30,095,495  | 1.32E-15 | 0.347 | 0.319 |  |  |  |                  |         |
| cg21645554 | 11 | 111,169,473 | 3.25E-26 | 0.347 | 0.350 |  |  |  | <i>C11orf93</i>  | TSS1500 |
| cg10236452 | 1  | 208,132,590 | 0.001196 | 0.347 | 0.335 |  |  |  |                  |         |
| cg09435929 | 8  | 86,350,913  | 0.001252 | 0.347 | 0.341 |  |  |  | <i>CA3</i>       | TSS200  |
| cg17764549 | 7  | 158,287,907 | 2.47E-22 | 0.347 | 0.332 |  |  |  | <i>PTPRN2</i>    | Body    |

|            |    |             |          |       |       |          |       |  |                  |         |
|------------|----|-------------|----------|-------|-------|----------|-------|--|------------------|---------|
| cg02786012 | 4  | 57,371,589  | 4.49E-05 | 0.347 | 0.348 |          |       |  | <i>ARL9</i>      | 5'UTR   |
| cg15750501 | 2  | 123,419,027 | 7.16E-25 | 0.347 | 0.351 |          |       |  |                  |         |
| cg24634333 | 6  | 111,887,834 | 2.64E-22 | 0.347 | 0.355 |          |       |  | <i>TRAF3IP2</i>  | Body    |
| cg02622316 | 6  | 28,367,410  | 1.25E-05 | 0.347 | 0.303 | 6.74E-25 | 0.256 |  | <i>ZSCAN12</i>   | Body    |
| cg21389753 | 17 | 59,480,674  | 3.84E-11 | 0.347 | 0.344 |          |       |  | <i>TBX2</i>      | Body    |
| cg04003500 | 9  | 71,788,759  | 9.93E-24 | 0.347 | 0.355 |          |       |  | <i>TJP2</i>      | TSS1500 |
| cg22418737 | 7  | 139,930,066 | 0.000213 | 0.347 | 0.233 |          |       |  |                  |         |
| cg22136365 | 16 | 71,611,043  | 5.54E-21 | 0.347 | 0.340 | 1.1E-25  | 0.265 |  | <i>TAT</i>       | TSS200  |
| cg14380270 | 17 | 33,700,747  | 0.00471  | 0.347 | 0.391 |          |       |  | <i>SLFN11</i>    | TSS200  |
| cg01682504 | 12 | 57,620,607  | 6.55E-07 | 0.347 | 0.382 |          |       |  |                  |         |
| cg16796458 | 16 | 85,254,655  | 2.4E-21  | 0.347 | 0.342 |          |       |  |                  |         |
| cg25334934 | 2  | 121,269,348 | 2.33E-14 | 0.347 | 0.345 |          |       |  |                  |         |
| cg12081743 | 7  | 18,535,499  | 6.31E-05 | 0.347 | 0.325 |          |       |  | <i>HDAC9</i>     | TSS1500 |
| cg02174092 | 10 | 43,846,539  | 0.01226  | 0.347 | 0.197 |          |       |  |                  |         |
| cg19788186 | 21 | 39,669,558  | 1.22E-15 | 0.347 | 0.317 |          |       |  | <i>KCNJ15</i>    | 5'UTR   |
| cg17199325 | 14 | 23,821,229  | 6.47E-15 | 0.347 | 0.299 |          |       |  | <i>SLC22A17</i>  | Body    |
| cg03117976 | 18 | 11,149,435  | 0.006172 | 0.347 | 0.369 |          |       |  | <i>FAM38B</i>    | TSS1500 |
| cg13476133 | 7  | 44,185,646  | 0.001557 | 0.347 | 0.369 |          |       |  | <i>GCK</i>       | Body    |
| cg04555220 | 5  | 9,546,695   | 1.09E-07 | 0.347 | 0.294 |          |       |  | <i>SEMA5A</i>    | TSS1500 |
| cg01406988 | 2  | 66,662,810  | 6.03E-05 | 0.347 | 0.395 |          |       |  | <i>MEIS1</i>     | 5'UTR   |
| cg17285883 | 1  | 17,896,290  | 1.21E-18 | 0.347 | 0.342 |          |       |  | <i>ARHGEF10L</i> | 5'UTR   |
| cg26713109 | 17 | 754,463     | 8.47E-15 | 0.347 | 0.320 |          |       |  | <i>NXN</i>       | Body    |
| cg02659086 | 11 | 67,350,976  | 0.002026 | 0.347 | 0.337 |          |       |  | <i>GSTP1</i>     | TSS200  |
| cg26196385 | 5  | 113,392,117 | 3.23E-26 | 0.347 | 0.341 |          |       |  |                  |         |
| cg11770080 | 5  | 78,408,179  | 4.37E-09 | 0.347 | 0.344 |          |       |  | <i>BHMT</i>      | Body    |
| cg16425038 | 14 | 24,641,194  | 1.83E-11 | 0.347 | 0.352 |          |       |  | <i>REC8</i>      | TSS200  |
| cg27539986 | 1  | 6,664,103   | 1.16E-20 | 0.347 | 0.337 |          |       |  | <i>KLHL21</i>    | TSS1500 |
| cg07266404 | 12 | 54,447,584  | 1.9E-05  | 0.347 | 0.275 |          |       |  | <i>HOXC4</i>     | 5'UTR   |
| cg05079548 | 7  | 128,337,621 | 2.41E-06 | 0.347 | 0.274 |          |       |  |                  |         |
| cg11536474 | 2  | 63,286,049  | 1.8E-06  | 0.347 | 0.335 |          |       |  |                  |         |
| cg19057001 | 5  | 150,538,165 | 4.83E-21 | 0.347 | 0.319 |          |       |  | <i>ANXA6</i>     | TSS1500 |
| cg13887205 | 5  | 139,525,946 | 1.75E-14 | 0.347 | 0.332 |          |       |  |                  |         |
| cg24676120 | 12 | 102,821,557 | 1.02E-20 | 0.346 | 0.325 |          |       |  | <i>IGF1</i>      | Body    |
| cg00165323 | 1  | 70,035,080  | 0.000682 | 0.346 | 0.314 |          |       |  |                  |         |

|            |    |             |          |       |       |          |       |  |                 |         |
|------------|----|-------------|----------|-------|-------|----------|-------|--|-----------------|---------|
| cg24115232 | 5  | 1,243,907   | 3.19E-18 | 0.346 | 0.365 |          |       |  | <i>SLC6A18</i>  | Body    |
| cg23425970 | 2  | 129,076,394 | 0.009268 | 0.346 | 0.288 |          |       |  | <i>HS6ST1</i>   | TSS1500 |
| cg06492744 | 11 | 65,406,254  | 1.4E-13  | 0.346 | 0.321 |          |       |  | <i>SIPA1</i>    | 5'UTR   |
| cg20134598 | X  | 54,947,308  | 1.2E-08  | 0.346 | 0.381 |          |       |  | <i>TRO</i>      | 5'UTR   |
| cg02076598 | 22 | 25,423,801  | 2.78E-19 | 0.346 | 0.339 |          |       |  | <i>KIAA1671</i> | TSS200  |
| cg17822706 | 19 | 18,415,538  | 6.93E-26 | 0.346 | 0.338 |          |       |  |                 |         |
| cg12379948 | 17 | 44,896,424  | 0.003322 | 0.346 | 0.416 |          |       |  | <i>WNT3</i>     | TSS1500 |
| cg26311610 | 7  | 73,593,138  | 3.3E-24  | 0.346 | 0.364 |          |       |  | <i>EIF4H</i>    | Body    |
| cg03046886 | 1  | 18,869,151  | 3.02E-25 | 0.346 | 0.326 |          |       |  |                 |         |
| cg06592987 | 7  | 149,112,142 | 1.02E-07 | 0.346 | 0.347 |          |       |  |                 |         |
| cg12136950 | 1  | 226,849,798 | 2.42E-14 | 0.346 | 0.357 |          |       |  | <i>ITPKB</i>    | Body    |
| cg25374649 | 18 | 13,611,400  | 0.000207 | 0.346 | 0.318 |          |       |  | <i>C18orf1</i>  | TSS1500 |
| cg10502231 | 1  | 224,363,449 | 1.94E-26 | 0.346 | 0.357 |          |       |  |                 |         |
| cg24091270 | 6  | 29,894,908  | 0.00163  | 0.346 | 0.360 |          |       |  | <i>HCG4P6</i>   | TSS1500 |
| cg02579022 | 5  | 137,828,267 | 1.88E-06 | 0.346 | 0.315 |          |       |  |                 |         |
| cg20295992 | 6  | 108,440,280 | 0.001366 | 0.346 | 0.365 |          |       |  |                 |         |
| cg26435178 | 10 | 73,848,458  | 3.14E-19 | 0.346 | 0.286 |          |       |  | <i>SPOCK2</i>   | 5'UTR   |
| cg20014398 | 11 | 31,825,792  | 0.003572 | 0.346 | 0.320 |          |       |  | <i>PAX6</i>     | Body    |
| cg23089272 | 15 | 39,985,431  | 1.65E-08 | 0.346 | 0.331 |          |       |  | <i>FSIP1</i>    | Body    |
| cg06040206 | 2  | 172,961,280 | 0.014515 | 0.346 | 0.217 |          |       |  |                 |         |
| cg20927661 | 2  | 5,837,002   | 0.002938 | 0.346 | 0.318 |          |       |  | <i>SOX11</i>    | 3'UTR   |
| cg06692785 | 1  | 180,882,681 | 7.49E-20 | 0.346 | 0.366 |          |       |  | <i>KIAA1614</i> | Body    |
| cg06263461 | 20 | 45,280,237  | 1.83E-15 | 0.346 | 0.338 |          |       |  | <i>SLC13A3</i>  | TSS200  |
| cg13104713 | 1  | 46,632,811  | 7.32E-10 | 0.346 | 0.367 |          |       |  |                 |         |
| cg25608973 | 2  | 21,022,431  | 0.002403 | 0.346 | 0.336 |          |       |  | <i>C2orf43</i>  | 5'UTR   |
| cg00809863 | 1  | 15,251,881  | 4.85E-16 | 0.346 | 0.304 |          |       |  | <i>KIAA1026</i> | Body    |
| cg23168425 | 7  | 157,561,848 | 7.29E-13 | 0.346 | 0.342 |          |       |  | <i>PTPRN2</i>   | Body    |
| cg18343437 | 8  | 142,528,415 | 1.24E-14 | 0.346 | 0.350 |          |       |  |                 |         |
| cg21091128 | 14 | 104,583,799 | 9.03E-14 | 0.346 | 0.312 |          |       |  | <i>MIR203</i>   | Body    |
| cg16517394 | 1  | 173,176,362 | 1.78E-14 | 0.346 | 0.343 | 2.03E-15 | 0.238 |  | <i>TNFSF4</i>   | 5'UTR   |
| cg03741406 | 1  | 40,255,103  | 0.000328 | 0.346 | 0.256 |          |       |  | <i>BMP8B</i>    | TSS1500 |
| cg09846875 | 7  | 143,582,630 | 1.37E-16 | 0.346 | 0.344 |          |       |  | <i>FAM115A</i>  | 5'UTR   |
| cg10462187 | 10 | 124,067,402 | 1.25E-15 | 0.346 | 0.362 |          |       |  | <i>BTBD16</i>   | Body    |
| cg03575641 | 7  | 128,809,442 | 3.91E-06 | 0.345 | 0.325 |          |       |  |                 |         |

|            |    |             |          |       |       |          |       |  |                 |         |
|------------|----|-------------|----------|-------|-------|----------|-------|--|-----------------|---------|
| cg18536496 | X  | 101,906,035 | 0.002254 | 0.345 | 0.385 |          |       |  | <i>GPRASP1</i>  | TSS1500 |
| cg08794940 | 6  | 30,711,073  | 3.31E-05 | 0.345 | 0.243 |          |       |  | <i>IER3</i>     | 3'UTR   |
| cg03122624 | 2  | 56,150,341  | 1.48E-14 | 0.345 | 0.306 |          |       |  | <i>EFEMP1</i>   | 1stExon |
| cg25865108 | 6  | 45,559,104  | 1.48E-23 | 0.345 | 0.316 |          |       |  |                 |         |
| cg25670330 | 3  | 138,665,984 | 0.034284 | 0.345 | 0.277 |          |       |  | <i>FOXL2</i>    | TSS200  |
| cg20457732 | 1  | 71,172,486  | 1.36E-05 | 0.345 | 0.271 |          |       |  |                 |         |
| cg14578894 | 4  | 87,281,511  | 2.72E-09 | 0.345 | 0.350 |          |       |  | <i>MAPK10</i>   | TSS200  |
| cg16483725 | 5  | 122,621,240 | 0.001104 | 0.345 | 0.340 |          |       |  |                 |         |
| cg27056119 | 6  | 2,842,239   | 4.57E-05 | 0.345 | 0.337 | 4.62E-21 | 0.258 |  | <i>SERPINB1</i> | TSS200  |
| cg10633526 | 3  | 13,560,246  | 7.45E-18 | 0.345 | 0.333 |          |       |  |                 |         |
| cg07984133 | 13 | 28,544,592  | 1.54E-05 | 0.345 | 0.307 |          |       |  | <i>CDX2</i>     | TSS1500 |
| cg24519146 | 6  | 33,160,318  | 0.004267 | 0.345 | 0.303 |          |       |  | <i>COL11A2</i>  | TSS200  |
| cg16519192 | 12 | 116,037,126 | 1.9E-06  | 0.345 | 0.294 |          |       |  |                 |         |
| cg22290648 | 19 | 39,694,709  | 2.35E-05 | 0.345 | 0.308 |          |       |  | <i>SYCN</i>     | 1stExon |
| cg11648594 | 1  | 1,566,860   | 0.00021  | 0.345 | 0.378 |          |       |  | <i>MMP23A</i>   | TSS1500 |
| cg01287975 | 7  | 97,361,241  | 2.47E-07 | 0.345 | 0.303 |          |       |  | <i>TAC1</i>     | TSS200  |
| cg01597387 | 14 | 24,458,208  | 1.82E-07 | 0.345 | 0.340 |          |       |  | <i>DHRS4L2</i>  | 1stExon |
| cg19204958 | 10 | 415,937     | 2.94E-28 | 0.345 | 0.331 |          |       |  | <i>DIP2C</i>    | Body    |
| cg08588180 | 6  | 25,138,905  | 0.000644 | 0.345 | 0.257 |          |       |  | <i>CMAH</i>     | TSS1500 |
| cg02599716 | 2  | 10,231,486  | 4.37E-05 | 0.345 | 0.316 |          |       |  |                 |         |
| cg17926950 | 19 | 13,983,613  | 5.76E-06 | 0.345 | 0.415 |          |       |  |                 |         |
| cg14973798 | 1  | 171,723,758 | 2.21E-14 | 0.345 | 0.327 |          |       |  |                 |         |
| cg01308913 | X  | 25,040,907  | 0.001202 | 0.345 | 0.385 |          |       |  |                 |         |
| cg02280532 | 2  | 160,761,244 | 3.9E-08  | 0.345 | 0.283 |          |       |  | <i>LY75</i>     | 5'UTR   |
| cg02589791 | 7  | 63,955,666  | 2.41E-29 | 0.345 | 0.321 |          |       |  |                 |         |
| cg01383955 | 22 | 42,828,447  | 1.7E-19  | 0.345 | 0.331 |          |       |  | <i>NFAM1</i>    | TSS200  |
| cg00456651 | 1  | 31,380,425  | 4.64E-24 | 0.345 | 0.341 |          |       |  | <i>SDC3</i>     | Body    |
| cg11626007 | 20 | 43,743,835  | 6.87E-11 | 0.345 | 0.332 |          |       |  | <i>WFDC5</i>    | TSS200  |
| cg08340755 | 20 | 30,176,106  | 2.59E-14 | 0.345 | 0.301 |          |       |  |                 |         |
| cg07703462 | 7  | 149,487,338 | 0.002755 | 0.345 | 0.262 |          |       |  | <i>SSPO</i>     | Body    |
| cg09668030 | 1  | 27,852,173  | 2.15E-17 | 0.345 | 0.333 |          |       |  |                 |         |
| cg05890620 | 19 | 10,397,612  | 3.74E-10 | 0.345 | 0.339 |          |       |  | <i>ICAM4</i>    | TSS200  |
| cg03513363 | 20 | 30,458,745  | 1.17E-08 | 0.345 | 0.289 | 1.27E-33 | 0.216 |  | <i>TTL9</i>     | 5'UTR   |
| cg21461649 | 7  | 117,119,938 | 1.73E-06 | 0.345 | 0.329 |          |       |  | <i>CFTR</i>     | TSS200  |

|            |    |             |          |       |       |          |       |  |                     |         |
|------------|----|-------------|----------|-------|-------|----------|-------|--|---------------------|---------|
| cg04737881 | 4  | 183,060,943 | 1.81E-14 | 0.345 | 0.327 |          |       |  | <i>MGC45800</i>     | Body    |
| cg04066019 | 3  | 16,554,466  | 0.019609 | 0.345 | 0.410 |          |       |  | <i>RFTN1</i>        | 5'UTR   |
| cg26187876 | 2  | 191,514,902 | 0.000505 | 0.344 | 0.177 |          |       |  | <i>NAB1</i>         | 5'UTR   |
| cg03940047 | 20 | 62,120,117  | 1.79E-17 | 0.344 | 0.315 |          |       |  | <i>EEF1A2</i>       | Body    |
| cg08318283 | 15 | 73,611,202  | 4.72E-06 | 0.344 | 0.276 |          |       |  |                     |         |
| cg14381919 | 11 | 12,701,969  | 0.001993 | 0.344 | 0.351 |          |       |  | <i>TEAD1</i>        | 5'UTR   |
| cg03714619 | 2  | 45,160,445  | 4.87E-06 | 0.344 | 0.356 |          |       |  |                     |         |
| cg22175814 | 17 | 71,739,339  | 2.95E-05 | 0.344 | 0.272 |          |       |  |                     |         |
| cg02144933 | 2  | 201,450,690 | 0.000122 | 0.344 | 0.319 | 2.77E-23 | 0.326 |  | <i>AOX1</i>         | TSS200  |
| cg11846236 | 3  | 48,632,568  | 2.8E-06  | 0.344 | 0.327 | 2.19E-25 | 0.242 |  | <i>COL7A1</i>       | 1stExon |
| cg17199320 | 1  | 231,177,008 | 0.000313 | 0.344 | 0.343 |          |       |  | <i>FAM89A</i>       | TSS1500 |
| cg18279326 | 10 | 102,475,324 | 3.4E-14  | 0.344 | 0.341 |          |       |  |                     |         |
| cg03096126 | 18 | 56,531,159  | 0.00019  | 0.344 | 0.197 |          |       |  | <i>ZNF532</i>       | 5'UTR   |
| cg23018117 | 7  | 150,413,687 | 9.31E-17 | 0.344 | 0.338 |          |       |  | <i>GIMAP1</i>       | TSS200  |
| cg12245706 | 2  | 71,823,484  | 3.39E-07 | 0.344 | 0.249 |          |       |  | <i>DYSF</i>         | Body    |
| cg14824052 | 10 | 2,951,326   | 4.17E-11 | 0.344 | 0.321 |          |       |  |                     |         |
| cg21088420 | 5  | 7,849,836   | 3.25E-24 | 0.344 | 0.326 |          |       |  | <i>C5orf49</i>      | Body    |
| cg14732324 | 5  | 528,621     | 0.008309 | 0.344 | 0.433 |          |       |  |                     |         |
| cg26911787 | 12 | 96,587,734  | 0.004729 | 0.344 | 0.281 | 7.22E-13 | 0.105 |  | <i>ELK3</i>         | TSS1500 |
| cg18648037 | 3  | 106,917,496 | 8.94E-28 | 0.344 | 0.346 |          |       |  | <i>LOC100302640</i> | Body    |
| cg21439763 | 1  | 173,176,366 | 6.68E-13 | 0.344 | 0.335 |          |       |  | <i>TNFSF4</i>       | 5'UTR   |
| cg25987744 | 19 | 46,916,588  | 3.7E-09  | 0.344 | 0.297 |          |       |  | <i>CCDC8</i>        | 1stExon |
| cg12298212 | 6  | 27,065,003  | 1.73E-07 | 0.344 | 0.283 |          |       |  |                     |         |
| cg19884345 | 6  | 26,189,379  | 0.00336  | 0.344 | 0.320 |          |       |  | <i>HIST1H4D</i>     | TSS200  |
| cg12776171 | 17 | 72,442,928  | 5.59E-17 | 0.344 | 0.335 |          |       |  | <i>GPRC5C</i>       | Body    |
| cg05535113 | 16 | 71,559,579  | 2.18E-10 | 0.344 | 0.313 | 8.22E-17 | 0.236 |  | <i>CHST4</i>        | TSS1500 |
| cg00465970 | 3  | 129,024,601 | 2.16E-17 | 0.344 | 0.350 |          |       |  |                     |         |
| cg01405004 | 3  | 68,980,539  | 9.9E-11  | 0.344 | 0.307 |          |       |  | <i>FAM19A4</i>      | 5'UTR   |
| cg19019849 | 4  | 13,533,145  | 8.74E-07 | 0.344 | 0.367 |          |       |  |                     |         |
| cg19818890 | 11 | 76,033,391  | 1.19E-07 | 0.344 | 0.312 |          |       |  |                     |         |
| cg03307401 | 19 | 51,568,260  | 0.03186  | 0.344 | 0.403 |          |       |  | <i>KLK13</i>        | Body    |
| cg13705284 | 3  | 58,523,313  | 2.14E-22 | 0.344 | 0.369 |          |       |  | <i>ACOX2</i>        | TSS1500 |
| cg05977109 | 10 | 52,178,181  | 4.42E-07 | 0.343 | 0.362 |          |       |  | <i>SGMS1</i>        | 5'UTR   |
| cg13917560 | 7  | 157,372,255 | 9.56E-37 | 0.343 | 0.333 |          |       |  | <i>PTPRN2</i>       | Body    |

|            |    |             |          |       |       |  |  |  |                   |         |
|------------|----|-------------|----------|-------|-------|--|--|--|-------------------|---------|
| cg10512745 | 1  | 50,884,480  | 0.004111 | 0.343 | 0.398 |  |  |  | <i>DMRTA2</i>     | Body    |
| cg16890428 | 19 | 55,866,412  | 0.000838 | 0.343 | 0.350 |  |  |  | <i>FAM71E2</i>    | 3'UTR   |
| cg11615395 | 4  | 140,925,869 | 0.02552  | 0.343 | 0.275 |  |  |  | <i>MAML3</i>      | Body    |
| cg02598441 | 17 | 62,777,298  | 0.000226 | 0.343 | 0.275 |  |  |  | <i>LOC146880</i>  | Body    |
| cg05264279 | 7  | 158,266,136 | 9.05E-11 | 0.343 | 0.336 |  |  |  | <i>PTPRN2</i>     | Body    |
| cg06561329 | 22 | 17,602,610  | 3.43E-18 | 0.343 | 0.313 |  |  |  | <i>CECR6</i>      | TSS1500 |
| cg09211763 | 2  | 190,044,504 | 7.26E-06 | 0.343 | 0.352 |  |  |  | <i>COL5A2</i>     | 1stExon |
| cg06211837 | 1  | 76,540,438  | 0.000814 | 0.343 | 0.314 |  |  |  | <i>ST6GALNAC3</i> | 1stExon |
| cg22864077 | 2  | 131,185,333 | 1.03E-07 | 0.343 | 0.353 |  |  |  |                   |         |
| cg10663628 | 2  | 23,798,452  | 4.76E-21 | 0.343 | 0.327 |  |  |  | <i>KLHL29</i>     | Body    |
| cg07223177 | X  | 46,434,198  | 0.000757 | 0.343 | 0.121 |  |  |  | <i>CHST7</i>      | 1stExon |
| cg26371061 | 5  | 71,014,857  | 2.28E-12 | 0.343 | 0.347 |  |  |  | <i>CARTPT</i>     | TSS200  |
| cg05463589 | 16 | 88,706,426  | 1.82E-09 | 0.343 | 0.281 |  |  |  | <i>IL17C</i>      | Body    |
| cg18465484 | 19 | 17,138,051  | 0.000511 | 0.343 | 0.279 |  |  |  | <i>CPAMD8</i>     | TSS1500 |
| cg18368411 | 1  | 31,845,959  | 0.003483 | 0.343 | 0.237 |  |  |  | <i>FABP3</i>      | TSS200  |
| cg13338877 | 6  | 29,974,531  | 3.71E-13 | 0.343 | 0.337 |  |  |  | <i>HLA-J</i>      | Body    |
| cg20291855 | 4  | 13,524,143  | 0.01542  | 0.343 | 0.378 |  |  |  |                   |         |
| cg10480343 | 15 | 48,938,347  | 0.009606 | 0.343 | 0.149 |  |  |  | <i>FBN1</i>       | TSS1500 |
| cg12698813 | 12 | 115,136,060 | 4.08E-12 | 0.343 | 0.321 |  |  |  |                   |         |
| cg11421255 | 15 | 60,690,974  | 3.06E-13 | 0.343 | 0.302 |  |  |  | <i>ANXA2</i>      | TSS1500 |
| cg18069125 | 20 | 45,439,836  | 6.55E-13 | 0.343 | 0.324 |  |  |  |                   |         |
| cg22524061 | 8  | 99,959,430  | 3.76E-11 | 0.343 | 0.348 |  |  |  | <i>OSR2</i>       | 5'UTR   |
| cg22783308 | 14 | 75,894,315  | 0.001385 | 0.343 | 0.154 |  |  |  | <i>JDP2</i>       | TSS200  |
| cg00465319 | 3  | 123,339,568 | 3.59E-10 | 0.343 | 0.348 |  |  |  | <i>MYLK</i>       | TSS200  |
| cg25247859 | 6  | 30,095,174  | 6.65E-23 | 0.343 | 0.331 |  |  |  |                   |         |
| cg06372850 | 2  | 164,205,188 | 5.78E-12 | 0.343 | 0.333 |  |  |  |                   |         |
| cg08572315 | 2  | 85,133,831  | 0.016043 | 0.343 | 0.234 |  |  |  |                   |         |
| cg14113919 | X  | 20,134,908  | 0.00045  | 0.343 | 0.294 |  |  |  | <i>MAP7D2</i>     | TSS200  |
| cg09676129 | 20 | 60,540,388  | 0.000002 | 0.343 | 0.321 |  |  |  |                   |         |
| cg15850390 | X  | 72,668,487  | 0.004074 | 0.343 | 0.311 |  |  |  | <i>CDX4</i>       | Body    |
| cg19472078 | 17 | 77,020,166  | 1.87E-05 | 0.343 | 0.307 |  |  |  | <i>C1QTNF1</i>    | TSS200  |
| cg04510919 | 4  | 7,282,819   | 1.66E-08 | 0.343 | 0.354 |  |  |  | <i>SORCS2</i>     | Body    |
| cg08146483 | 1  | 75,602,412  | 0.000923 | 0.343 | 0.332 |  |  |  | <i>LHX8</i>       | Body    |
| cg04728482 | 5  | 72,529,902  | 0.006226 | 0.343 | 0.350 |  |  |  |                   |         |

|            |    |             |          |       |       |          |       |  |                  |         |
|------------|----|-------------|----------|-------|-------|----------|-------|--|------------------|---------|
| cg19228034 | 7  | 92,672,812  | 1.83E-15 | 0.343 | 0.319 |          |       |  |                  |         |
| cg14669379 | 1  | 112,058,559 | 7.85E-23 | 0.343 | 0.329 |          |       |  | <i>ADORA3</i>    | Body    |
| cg24479590 | 17 | 7,348,322   | 8.78E-14 | 0.343 | 0.307 |          |       |  | <i>CHRNA1</i>    | TSS200  |
| cg07866212 | 8  | 23,836,952  | 1.03E-09 | 0.343 | 0.307 |          |       |  |                  |         |
| cg13591204 | 9  | 38,064,182  | 2.9E-13  | 0.343 | 0.328 |          |       |  | <i>SHB</i>       | Body    |
| cg27018070 | 1  | 38,470,578  | 2.8E-11  | 0.343 | 0.274 | 1.26E-24 | 0.120 |  | <i>FHL3</i>      | 5'UTR   |
| cg01277506 | 5  | 80,690,205  | 2.25E-09 | 0.343 | 0.335 |          |       |  | <i>RNU5E</i>     | Body    |
| cg03345454 | 2  | 202,901,428 | 3.86E-07 | 0.343 | 0.366 |          |       |  | <i>FZD7</i>      | 1stExon |
| cg19237879 | 11 | 9,113,458   | 1.26E-05 | 0.343 | 0.255 | 2.42E-27 | 0.197 |  | <i>SCUBE2</i>    | TSS1500 |
| cg08377819 | 6  | 28,956,268  | 2.77E-06 | 0.343 | 0.270 |          |       |  |                  |         |
| cg00011616 | 17 | 75,672,423  | 0.001397 | 0.343 | 0.360 |          |       |  |                  |         |
| cg13045134 | 8  | 103,741,780 | 8.25E-17 | 0.343 | 0.369 |          |       |  |                  |         |
| cg09570682 | 6  | 106,429,443 | 1.04E-07 | 0.342 | 0.366 |          |       |  |                  |         |
| cg09999194 | 17 | 77,765,305  | 0.006765 | 0.342 | 0.318 |          |       |  |                  |         |
| cg09114581 | 6  | 32,077,103  | 2.29E-09 | 0.342 | 0.316 |          |       |  | <i>TNXB</i>      | 5'UTR   |
| cg08856529 | 8  | 140,714,586 | 1.65E-07 | 0.342 | 0.402 |          |       |  | <i>KCNK9</i>     | Body    |
| cg05119316 | 6  | 29,716,135  | 7.53E-08 | 0.342 | 0.263 |          |       |  | <i>LOC285830</i> | Body    |
| cg07351192 | 3  | 5,137,773   | 1.53E-12 | 0.342 | 0.327 |          |       |  |                  |         |
| cg27058988 | 15 | 67,200,879  | 5.64E-10 | 0.342 | 0.350 |          |       |  |                  |         |
| cg22725685 | 4  | 74,810,310  | 0.002202 | 0.342 | 0.350 |          |       |  |                  |         |
| cg07702750 | 7  | 28,998,214  | 0.004375 | 0.342 | 0.246 |          |       |  | <i>TRIL</i>      | TSS200  |
| cg19982230 | 17 | 27,045,302  | 6.87E-14 | 0.342 | 0.363 |          |       |  | <i>RAB34</i>     | TSS1500 |
| cg27513574 | 4  | 25,657,440  | 0.003459 | 0.342 | 0.192 |          |       |  | <i>SLC34A2</i>   | 1stExon |
| cg24021113 | 6  | 3,752,849   | 1.06E-08 | 0.342 | 0.310 |          |       |  | <i>C6orf145</i>  | TSS1500 |
| cg06188744 | 10 | 3,108,651   | 1.08E-21 | 0.342 | 0.341 |          |       |  | <i>PFKP</i>      | TSS1500 |
| cg00990022 | 1  | 40,138,052  | 6.1E-18  | 0.342 | 0.342 |          |       |  | <i>NT5C1A</i>    | TSS1500 |
| cg09206294 | 15 | 42,072,687  | 1.12E-16 | 0.342 | 0.334 |          |       |  | <i>MAPKBP1</i>   | Body    |
| cg24954668 | 7  | 20,833,585  | 0.015972 | 0.342 | 0.389 |          |       |  |                  |         |
| cg15853125 | 21 | 32,932,267  | 4.84E-05 | 0.342 | 0.316 |          |       |  | <i>TIAM1</i>     | TSS1500 |
| cg25315362 | 3  | 116,164,576 | 9.64E-23 | 0.342 | 0.310 | 2E-36    | 0.231 |  | <i>LSAMP</i>     | TSS200  |
| cg19871940 | 14 | 57,264,287  | 0.000698 | 0.342 | 0.365 |          |       |  |                  |         |
| cg00691830 | 15 | 37,388,540  | 4.96E-06 | 0.342 | 0.418 |          |       |  | <i>MEIS2</i>     | Body    |
| cg00531137 | 16 | 57,643,932  | 4.72E-06 | 0.342 | 0.337 |          |       |  |                  |         |
| cg06892726 | 6  | 26,087,607  | 0.000926 | 0.342 | 0.353 | 1.96E-11 | 0.122 |  | <i>HFE</i>       | 1stExon |



|            |    |             |          |       |       |          |       |     |                 |         |
|------------|----|-------------|----------|-------|-------|----------|-------|-----|-----------------|---------|
| cg00450784 | 12 | 106,979,062 | 0.000837 | 0.342 | 0.369 |          |       |     | <i>RFX4</i>     | Body    |
| cg18451588 | 7  | 29,606,289  | 1.72E-14 | 0.342 | 0.328 |          |       |     | <i>PRR15</i>    | Body    |
| cg24738311 | 15 | 89,952,632  | 8.74E-06 | 0.342 | 0.359 |          |       |     |                 |         |
| cg08892600 | 1  | 223,538,601 | 3.87E-08 | 0.342 | 0.316 |          |       |     | <i>SUSD4</i>    | TSS1500 |
| cg14474520 | 12 | 124,781,038 | 1.07E-20 | 0.342 | 0.303 |          |       |     | <i>FAM101A</i>  | 5'UTR   |
| cg16370398 | 12 | 54,448,913  | 9.08E-14 | 0.342 | 0.325 |          |       |     | <i>HOXC4</i>    | Body    |
| cg18282849 | 11 | 86,085,694  | 4.13E-07 | 0.342 | 0.353 |          |       |     | <i>CCDC81</i>   | TSS200  |
| cg08116137 | 2  | 73,870,653  | 3.82E-16 | 0.342 | 0.336 | 2.64E-24 | 0.212 |     | <i>NAT8</i>     | TSS1500 |
| cg09106903 | 1  | 217,309,568 | 7.99E-12 | 0.342 | 0.341 |          |       |     | <i>ESRRG</i>    | 5'UTR   |
| cg06935438 | 9  | 4,116,989   | 2.88E-22 | 0.342 | 0.331 |          |       |     | <i>GLIS3</i>    | Body    |
| cg01972751 | 6  | 137,814,728 | 0.001051 | 0.342 | 0.291 |          |       |     | <i>OLIG3</i>    | 1stExon |
| cg07915884 | 1  | 245,474,048 | 4.12E-21 | 0.342 | 0.333 |          |       |     | <i>KIF26B</i>   | Body    |
| cg11678461 | 11 | 3,181,822   | 2.1E-12  | 0.342 | 0.290 |          |       |     | <i>OSBPL5</i>   | 5'UTR   |
| cg10126181 | 6  | 21,832,051  | 0.000216 | 0.342 | 0.308 |          |       |     | <i>FLJ22536</i> | Body    |
| cg24158594 | 8  | 60,030,763  | 0.047357 | 0.342 | 0.378 |          |       |     | <i>TOX</i>      | Body    |
| cg03299336 | 11 | 11,465,911  | 3.69E-15 | 0.342 | 0.277 |          |       |     | <i>GALNTL4</i>  | Body    |
| cg15780398 | 2  | 97,439,827  | 3.11E-07 | 0.342 | 0.280 |          |       | Yes | <i>CNNM4</i>    | Body    |
| cg24676071 | 7  | 45,613,410  | 1.17E-08 | 0.342 | 0.317 |          |       |     | <i>ADCY1</i>    | TSS1500 |
| cg14957943 | 3  | 48,632,783  | 0.001105 | 0.342 | 0.372 |          |       |     | <i>COL7A1</i>   | TSS200  |
| cg18356974 | 7  | 128,809,100 | 6.97E-06 | 0.342 | 0.318 |          |       |     |                 |         |
| cg08352755 | 5  | 145,758,879 | 3.87E-17 | 0.342 | 0.304 |          |       |     |                 |         |
| cg09789426 | X  | 102,000,698 | 7.05E-13 | 0.342 | 0.266 |          |       |     | <i>BHLHB9</i>   | 5'UTR   |
| cg27063372 | 16 | 616,857     | 0.00049  | 0.342 | 0.368 |          |       |     | <i>NHLRC4</i>   | TSS200  |
| cg08199758 | 16 | 3,062,426   | 3.03E-08 | 0.342 | 0.340 |          |       |     | <i>CLDN9</i>    | TSS200  |
| cg22905097 | 13 | 43,566,401  | 0.000271 | 0.342 | 0.331 | 1.3E-16  | 0.171 |     | <i>EPSTI1</i>   | TSS200  |
| cg19323951 | 11 | 64,993,076  | 0.000395 | 0.342 | 0.332 |          |       |     | <i>SLC22A20</i> | Body    |
| cg27488348 | 12 | 14,720,834  | 8.39E-07 | 0.342 | 0.270 |          |       |     | <i>PLBD1</i>    | TSS200  |
| cg00558689 | 6  | 41,607,109  | 5.83E-07 | 0.342 | 0.306 |          |       |     | <i>MDFI</i>     | Body    |
| cg02090033 | 3  | 65,583,617  | 5.08E-05 | 0.342 | 0.352 |          |       |     | <i>MAGI1</i>    | Body    |
| cg25120945 | 6  | 29,975,416  | 6.71E-14 | 0.342 | 0.319 |          |       |     | <i>HLA-J</i>    | Body    |
| cg05214748 | 16 | 31,214,335  | 2.61E-18 | 0.342 | 0.272 |          |       |     | <i>PYCARD</i>   | TSS200  |
| cg13931925 | 1  | 179,545,216 | 1.13E-05 | 0.342 | 0.262 |          |       |     | <i>NPHS2</i>    | TSS200  |
| cg15059804 | 1  | 33,766,318  | 5.12E-18 | 0.342 | 0.325 |          |       |     | <i>ZNF362</i>   | 3'UTR   |
| cg16201596 | 6  | 29,974,568  | 1.75E-08 | 0.341 | 0.316 |          |       |     | <i>HLA-J</i>    | Body    |

|            |    |             |          |       |       |  |  |  |                 |         |
|------------|----|-------------|----------|-------|-------|--|--|--|-----------------|---------|
| cg17741014 | 5  | 80,690,220  | 2.69E-16 | 0.341 | 0.291 |  |  |  | <i>RNU5E</i>    | Body    |
| cg02746725 | 2  | 177,054,306 | 3.63E-14 | 0.341 | 0.316 |  |  |  | <i>HOXD1</i>    | Body    |
| cg27453857 | 17 | 4,689,640   | 8.4E-05  | 0.341 | 0.241 |  |  |  | <i>VMO1</i>     | 1stExon |
| cg13056495 | 7  | 134,143,249 | 0.000249 | 0.341 | 0.278 |  |  |  | <i>AKR1B1</i>   | Body    |
| cg17524136 | 11 | 84,028,382  | 2.23E-09 | 0.341 | 0.387 |  |  |  | <i>DLG2</i>     | Body    |
| cg25371919 | 2  | 63,284,481  | 1.61E-07 | 0.341 | 0.334 |  |  |  |                 |         |
| cg18484034 | 10 | 93,647,648  | 8.42E-05 | 0.341 | 0.294 |  |  |  |                 |         |
| cg15902390 | 15 | 37,387,438  | 0.001871 | 0.341 | 0.395 |  |  |  | <i>MEIS2</i>    | Body    |
| cg07194250 | X  | 133,680,463 | 0.001414 | 0.341 | 0.229 |  |  |  | <i>MGC16121</i> | Body    |
| cg02067712 | 13 | 28,364,724  | 0.000007 | 0.341 | 0.354 |  |  |  |                 |         |
| cg21961771 | 12 | 100,750,652 | 4.18E-06 | 0.341 | 0.335 |  |  |  | <i>SLC17A8</i>  | TSS1500 |
| cg18544564 | 2  | 189,839,120 | 3.09E-14 | 0.341 | 0.340 |  |  |  | <i>COL3A1</i>   | 5'UTR   |
| cg24547885 | 2  | 179,914,868 | 9.1E-05  | 0.341 | 0.293 |  |  |  |                 |         |
| cg04767500 | 6  | 38,682,956  | 2.13E-07 | 0.341 | 0.324 |  |  |  |                 |         |
| cg12018098 | 19 | 38,885,481  | 2.49E-09 | 0.341 | 0.344 |  |  |  | <i>SPRED3</i>   | Body    |
| cg00028013 | 15 | 74,218,697  | 1.38E-20 | 0.341 | 0.322 |  |  |  | <i>LOXL1</i>    | TSS200  |
| cg10740054 | 19 | 18,548,004  | 0.000425 | 0.341 | 0.210 |  |  |  | <i>ISYNA1</i>   | Body    |
| cg26605683 | 5  | 172,751,269 | 1.46E-05 | 0.341 | 0.391 |  |  |  | <i>STC2</i>     | Body    |
| cg06967228 | X  | 68,525,725  | 9.12E-08 | 0.341 | 0.365 |  |  |  |                 |         |
| cg15677293 | 1  | 236,559,595 | 0.004455 | 0.341 | 0.106 |  |  |  | <i>EDARADD</i>  | Body    |
| cg13343687 | 3  | 49,843,809  | 1.13E-31 | 0.341 | 0.334 |  |  |  | <i>UBA7</i>     | Body    |
| cg15057061 | 3  | 181,437,299 | 0.009408 | 0.341 | 0.374 |  |  |  | <i>SOX2OT</i>   | Body    |
| cg04384626 | 4  | 41,882,580  | 3.35E-07 | 0.341 | 0.302 |  |  |  |                 |         |
| cg11282676 | 6  | 26,018,003  | 2.27E-05 | 0.341 | 0.292 |  |  |  | <i>HIST1H1A</i> | 5'UTR   |
| cg22590761 | 15 | 74,218,921  | 8.24E-19 | 0.341 | 0.297 |  |  |  | <i>LOXL1</i>    | 5'UTR   |
| cg17415451 | 5  | 11,589,049  | 3.22E-06 | 0.341 | 0.308 |  |  |  | <i>CTNND2</i>   | Body    |
| cg12254845 | 15 | 89,952,272  | 3.77E-09 | 0.341 | 0.378 |  |  |  |                 |         |
| cg27402429 | 3  | 72,788,294  | 4.54E-10 | 0.341 | 0.265 |  |  |  |                 |         |
| cg13997864 | 2  | 96,990,982  | 2.52E-06 | 0.341 | 0.297 |  |  |  | <i>ITPRIPL1</i> | TSS1500 |
| cg27142536 | 11 | 20,618,198  | 6.99E-14 | 0.341 | 0.323 |  |  |  |                 |         |
| cg16438525 | 3  | 52,517,742  | 1.18E-19 | 0.341 | 0.331 |  |  |  | <i>NISCH</i>    | Body    |
| cg14665813 | 11 | 59,333,490  | 0.001594 | 0.341 | 0.310 |  |  |  |                 |         |
| cg07881405 | 5  | 3,597,487   | 0.000286 | 0.341 | 0.375 |  |  |  | <i>IRX1</i>     | Body    |
| cg20658918 | 2  | 131,185,698 | 0.000143 | 0.341 | 0.307 |  |  |  |                 |         |

|            |    |             |          |       |       |          |       |     |                 |         |
|------------|----|-------------|----------|-------|-------|----------|-------|-----|-----------------|---------|
| cg00081799 | 1  | 6,390,793   | 1.72E-63 | 0.341 | 0.326 |          |       |     | <i>ACOT7</i>    | Body    |
| cg18664667 | 7  | 105,517,962 | 5.72E-07 | 0.341 | 0.244 |          |       |     | <i>ATXN7L1</i>  | TSS1500 |
| cg04338652 | 18 | 13,136,597  | 4.16E-07 | 0.341 | 0.287 |          |       |     |                 |         |
| cg01566127 | 11 | 63,828,762  | 4.06E-31 | 0.341 | 0.332 |          |       |     | <i>MACROD1</i>  | Body    |
| cg05485137 | 10 | 28,035,864  | 2.21E-08 | 0.341 | 0.359 |          |       |     | <i>MKX</i>      | TSS1500 |
| cg00347563 | 1  | 78,511,600  | 0.035841 | 0.341 | 0.448 |          |       |     | <i>GIPC2</i>    | 1stExon |
| cg27619475 | 17 | 73,083,881  | 0.001169 | 0.341 | 0.152 | 7.84E-16 | 0.260 |     | <i>SLC16A5</i>  | TSS200  |
| cg25291387 | 6  | 29,910,237  | 5.63E-05 | 0.341 | 0.259 |          |       | Yes | <i>HLA-A</i>    | TSS200  |
| cg00489401 | 5  | 180,075,875 | 2.64E-10 | 0.341 | 0.330 | 2E-33    | 0.348 |     | <i>FLT4</i>     | Body    |
| cg17437939 | 7  | 97,361,252  | 0.000133 | 0.341 | 0.342 |          |       |     | <i>TAC1</i>     | TSS200  |
| cg26874693 | 12 | 111,618,936 | 1.36E-06 | 0.341 | 0.251 |          |       |     | <i>CUX2</i>     | Body    |
| cg14188232 | 15 | 68,724,065  | 0.000226 | 0.341 | 0.287 | 1.6E-31  | 0.266 |     | <i>ITGA11</i>   | Body    |
| cg14652638 | 6  | 2,842,215   | 1.73E-06 | 0.341 | 0.320 |          |       |     | <i>SERPINB1</i> | TSS200  |
| cg25402480 | 12 | 53,719,777  | 7.24E-08 | 0.341 | 0.362 |          |       |     |                 |         |
| cg12738718 | 6  | 32,121,204  | 5.4E-07  | 0.341 | 0.408 |          |       |     | <i>PPT2</i>     | TSS200  |
| cg14251870 | 6  | 137,809,529 | 0.000201 | 0.341 | 0.394 |          |       |     |                 |         |
| cg26237168 | 8  | 10,872,648  | 0.000101 | 0.341 | 0.358 |          |       |     | <i>XKR6</i>     | Body    |
| cg07133749 | 17 | 29,249,870  | 0.000258 | 0.341 | 0.348 |          |       |     | <i>ADAP2</i>    | Body    |
| cg18267049 | 10 | 101,875,028 | 2.85E-06 | 0.341 | 0.331 |          |       |     |                 |         |
| cg21766898 | 6  | 50,814,089  | 0.000551 | 0.341 | 0.351 |          |       |     | <i>TFAP2B</i>   | 3'UTR   |
| cg26104932 | 2  | 219,647,360 | 7.4E-05  | 0.341 | 0.213 |          |       |     | <i>CYP27A1</i>  | Body    |
| cg21819468 | 1  | 13,910,569  | 0.00344  | 0.341 | 0.413 |          |       |     | <i>PDPN</i>     | TSS1500 |
| cg05669497 | 13 | 113,655,468 | 2.64E-10 | 0.341 | 0.268 |          |       |     | <i>MCF2L</i>    | Body    |
| cg11014463 | 6  | 56,818,479  | 7.1E-07  | 0.341 | 0.338 |          |       |     | <i>BEND6</i>    | TSS1500 |
| cg15826479 | 17 | 78,806,493  | 1.44E-13 | 0.341 | 0.334 |          |       |     | <i>RPTOR</i>    | Body    |
| cg13096007 | 4  | 24,802,340  | 1.07E-08 | 0.341 | 0.351 |          |       |     | <i>SOD3</i>     | 3'UTR   |
| cg14703002 | 6  | 26,018,058  | 0.001439 | 0.340 | 0.278 |          |       |     | <i>HIST1H1A</i> | TSS200  |
| cg06457011 | 20 | 39,767,490  | 0.003381 | 0.340 | 0.245 |          |       |     | <i>PLCG1</i>    | Body    |
| cg03585778 | 1  | 205,537,837 | 2.66E-06 | 0.340 | 0.253 |          |       |     | <i>MFSD4</i>    | TSS1500 |
| cg14807945 | 2  | 145,189,102 | 9.24E-26 | 0.340 | 0.332 |          |       |     | <i>ZEB2</i>     | Body    |
| cg23971170 | 1  | 165,326,269 | 7.07E-12 | 0.340 | 0.328 |          |       |     | <i>LMX1A</i>    | TSS1500 |
| cg01678415 | 16 | 5,037,461   | 0.000189 | 0.340 | 0.366 |          |       |     | <i>SEC14L5</i>  | Body    |
| cg03953626 | 6  | 30,652,396  | 8.61E-15 | 0.340 | 0.334 |          |       |     | <i>KIAA1949</i> | Body    |
| cg02774862 | 10 | 70,321,580  | 6.96E-14 | 0.340 | 0.325 |          |       |     | <i>TET1</i>     | 5'UTR   |

|            |    |             |          |       |       |  |  |  |                  |         |
|------------|----|-------------|----------|-------|-------|--|--|--|------------------|---------|
| cg00083833 | 16 | 50,583,273  | 1.62E-22 | 0.340 | 0.317 |  |  |  | <i>NKD1</i>      | Body    |
| cg18605031 | 3  | 49,314,155  | 1.68E-05 | 0.340 | 0.271 |  |  |  | <i>C3orf62</i>   | 1stExon |
| cg01875784 | 5  | 1,874,703   | 1.14E-13 | 0.340 | 0.354 |  |  |  |                  |         |
| cg02930667 | 2  | 219,671,206 | 3.14E-08 | 0.340 | 0.334 |  |  |  | <i>CYP27A1</i>   | Body    |
| cg01031032 | 3  | 112,051,894 | 0.006313 | 0.340 | 0.439 |  |  |  | <i>CD200</i>     | TSS200  |
| cg20663376 | 15 | 31,372,997  | 6.06E-11 | 0.340 | 0.330 |  |  |  | <i>TRPM1</i>     | 5'UTR   |
| cg01560873 | 5  | 3,116,792   | 5.05E-12 | 0.340 | 0.364 |  |  |  |                  |         |
| cg00458932 | 2  | 208,199,465 | 2.17E-15 | 0.340 | 0.333 |  |  |  |                  |         |
| cg21207028 | 20 | 327,619     | 0.035742 | 0.340 | 0.053 |  |  |  | <i>NRSN2</i>     | 1stExon |
| cg26540943 | X  | 154,842,296 | 0.004916 | 0.340 | 0.317 |  |  |  | <i>TMLHE</i>     | 5'UTR   |
| cg13445796 | 11 | 20,181,725  | 0.020509 | 0.340 | 0.341 |  |  |  | <i>DBX1</i>      | 1stExon |
| cg24323958 | 1  | 108,741,884 | 3.13E-05 | 0.340 | 0.218 |  |  |  | <i>SLC25A24</i>  | Body    |
| cg12191938 | 10 | 88,730,946  | 0.008709 | 0.340 | 0.293 |  |  |  | <i>AGAP11</i>    | 5'UTR   |
| cg08186924 | 1  | 179,544,721 | 4.82E-10 | 0.340 | 0.259 |  |  |  | <i>NPHS2</i>     | Body    |
| cg10631716 | 8  | 135,469,436 | 0.000186 | 0.340 | 0.217 |  |  |  |                  |         |
| cg12783819 | 17 | 75,369,657  | 0.009827 | 0.340 | 0.307 |  |  |  | <i>SEPT9</i>     | 5'UTR   |
| cg02861178 | 20 | 10,492,319  | 1.11E-08 | 0.340 | 0.327 |  |  |  | <i>C20orf94</i>  | Body    |
| cg19767131 | 14 | 92,979,698  | 1.19E-05 | 0.340 | 0.226 |  |  |  | <i>RIN3</i>      | TSS1500 |
| cg18239431 | 8  | 25,898,220  | 2.79E-15 | 0.340 | 0.312 |  |  |  | <i>EBF2</i>      | Body    |
| cg27408285 | 12 | 54,653,364  | 6.13E-26 | 0.340 | 0.361 |  |  |  | <i>CBX5</i>      | 1stExon |
| cg25647300 | 8  | 49,670,412  | 1.82E-20 | 0.340 | 0.349 |  |  |  |                  |         |
| cg27045447 | 22 | 28,198,218  | 0.004196 | 0.340 | 0.326 |  |  |  | <i>MN1</i>       | TSS1500 |
| cg01439876 | 1  | 119,543,336 | 0.000989 | 0.340 | 0.360 |  |  |  |                  |         |
| cg15826437 | 17 | 38,334,186  | 0.002079 | 0.340 | 0.298 |  |  |  | <i>RAPGEFL1</i>  | TSS200  |
| cg19755813 | 17 | 650,208     | 9.23E-07 | 0.340 | 0.306 |  |  |  | <i>GEMIN4</i>    | Body    |
| cg03632704 | 5  | 87,973,439  | 9.37E-06 | 0.340 | 0.316 |  |  |  | <i>LOC645323</i> | Body    |
| cg14151259 | 6  | 19,837,015  | 0.000174 | 0.340 | 0.191 |  |  |  | <i>ID4</i>       | TSS1500 |
| cg11654024 | 1  | 85,230,119  | 1.31E-15 | 0.340 | 0.306 |  |  |  |                  |         |
| cg14230696 | 2  | 176,968,920 | 4.76E-05 | 0.340 | 0.314 |  |  |  |                  |         |
| cg19901801 | 1  | 114,697,032 | 6.79E-05 | 0.340 | 0.336 |  |  |  | <i>SYT6</i>      | TSS1500 |
| cg19748424 | 5  | 6,583,601   | 7.42E-10 | 0.340 | 0.300 |  |  |  | <i>LOC255167</i> | Body    |
| cg05675514 | 6  | 22,026,015  | 2.32E-08 | 0.340 | 0.346 |  |  |  | <i>FLJ22536</i>  | Body    |
| cg22549870 | 15 | 89,949,776  | 0.001273 | 0.340 | 0.380 |  |  |  |                  |         |
| cg11523712 | 2  | 176,957,055 | 5.32E-08 | 0.340 | 0.305 |  |  |  | <i>HOXD13</i>    | TSS1500 |

|            |    |             |          |       |       |          |       |  |                 |         |
|------------|----|-------------|----------|-------|-------|----------|-------|--|-----------------|---------|
| cg15355146 | 1  | 40,368,366  | 1.79E-07 | 0.339 | 0.332 |          |       |  | <i>MYCL1</i>    | TSS1500 |
| cg24653181 | 15 | 90,039,582  | 8.81E-10 | 0.339 | 0.350 | 9.01E-32 | 0.237 |  | <i>RHCG</i>     | Body    |
| cg22609785 | 10 | 80,416,672  | 4.44E-11 | 0.339 | 0.312 |          |       |  |                 |         |
| cg03448362 | 1  | 172,864,347 | 4.97E-05 | 0.339 | 0.302 |          |       |  |                 |         |
| cg09626894 | 7  | 117,119,637 | 2.04E-10 | 0.339 | 0.335 |          |       |  | <i>CFTR</i>     | TSS1500 |
| cg06132400 | 7  | 38,350,938  | 0.00113  | 0.339 | 0.110 |          |       |  |                 |         |
| cg11649376 | 12 | 81,473,234  | 2.79E-23 | 0.339 | 0.315 |          |       |  | <i>ACSS3</i>    | Body    |
| cg16917193 | 12 | 54,089,295  | 6.15E-05 | 0.339 | 0.369 |          |       |  |                 |         |
| cg20433275 | 1  | 156,358,408 | 0.010127 | 0.339 | 0.183 |          |       |  |                 |         |
| cg16266579 | 12 | 48,591,673  | 2.07E-05 | 0.339 | 0.362 |          |       |  |                 |         |
| cg04097639 | 1  | 200,009,830 | 0.000175 | 0.339 | 0.391 |          |       |  | <i>NR5A2</i>    | Body    |
| cg08440556 | 4  | 83,718,952  | 1.31E-05 | 0.339 | 0.229 |          |       |  | <i>SCD5</i>     | Body    |
| cg27614319 | 17 | 35,079,061  | 3.62E-15 | 0.339 | 0.343 |          |       |  |                 |         |
| cg24711649 | 12 | 81,472,118  | 3.15E-11 | 0.339 | 0.355 |          |       |  | <i>ACSS3</i>    | 1stExon |
| cg10527300 | 13 | 110,874,326 | 8.9E-45  | 0.339 | 0.315 |          |       |  | <i>COL4A1</i>   | Body    |
| cg01833675 | 2  | 225,266,876 | 0.005096 | 0.339 | 0.351 |          |       |  | <i>FAM124B</i>  | TSS200  |
| cg22604316 | 1  | 46,958,801  | 2.42E-05 | 0.339 | 0.349 |          |       |  |                 |         |
| cg25032745 | 10 | 15,481,695  | 3.87E-09 | 0.339 | 0.296 |          |       |  |                 |         |
| cg05757757 | 10 | 80,008,637  | 5.16E-29 | 0.339 | 0.317 |          |       |  |                 |         |
| cg19295451 | 15 | 102,010,161 | 5.01E-15 | 0.339 | 0.331 |          |       |  | <i>PCSK6</i>    | Body    |
| cg26940178 | 1  | 76,082,888  | 2.08E-05 | 0.339 | 0.282 |          |       |  |                 |         |
| cg09349604 | 4  | 41,880,747  | 0.000914 | 0.339 | 0.308 |          |       |  |                 |         |
| cg08713365 | 20 | 327,623     | 0.026017 | 0.339 | 0.044 | 2.11E-09 | 0.159 |  | <i>NRSN2</i>    | 1stExon |
| cg05364884 | 16 | 17,107,768  | 3.03E-10 | 0.339 | 0.361 |          |       |  |                 |         |
| cg08275638 | 3  | 64,253,818  | 2.03E-31 | 0.339 | 0.349 |          |       |  |                 |         |
| cg02517337 | 20 | 51,590,841  | 4.56E-08 | 0.339 | 0.388 |          |       |  | <i>TSHZ2</i>    | Body    |
| cg27537164 | 6  | 168,079,127 | 0.00029  | 0.339 | 0.242 |          |       |  |                 |         |
| cg00460049 | 1  | 66,998,806  | 3.11E-06 | 0.339 | 0.243 |          |       |  | <i>SGIP1</i>    | TSS1500 |
| cg26869417 | 10 | 130,274,509 | 7.65E-07 | 0.339 | 0.262 |          |       |  |                 |         |
| cg16264966 | 22 | 41,613,790  | 9.67E-24 | 0.339 | 0.340 |          |       |  | <i>L3MBTL2</i>  | Body    |
| cg13532547 | 17 | 185,957     | 2.18E-16 | 0.339 | 0.301 |          |       |  | <i>RPH3AL</i>   | 5'UTR   |
| cg08190858 | 12 | 54,321,346  | 0.00136  | 0.339 | 0.350 |          |       |  |                 |         |
| cg19870512 | 12 | 4,919,081   | 0.000484 | 0.339 | 0.142 |          |       |  | <i>KCNA6</i>    | 5'UTR   |
| cg04096619 | 5  | 9,547,595   | 5.18E-08 | 0.339 | 0.302 |          |       |  | <i>SNORD123</i> | TSS1500 |

|            |    |             |          |       |       |          |       |  |          |         |
|------------|----|-------------|----------|-------|-------|----------|-------|--|----------|---------|
| cg08949655 | 2  | 176,940,301 | 3.83E-05 | 0.339 | 0.319 |          |       |  |          |         |
| cg18206027 | 7  | 49,813,486  | 0.001656 | 0.339 | 0.467 |          |       |  | VWC2     | 1stExon |
| cg22234930 | 15 | 72,519,739  | 1.18E-14 | 0.339 | 0.341 |          |       |  | PKM2     | 5'UTR   |
| cg21516478 | 5  | 150,400,328 | 0.003786 | 0.339 | 0.129 | 3.48E-11 | 0.190 |  | GPX3     | Body    |
| cg22097731 | 15 | 63,334,436  | 0.017893 | 0.339 | 0.315 |          |       |  | TPM1     | TSS1500 |
| cg09278708 | X  | 101,905,837 | 3.18E-07 | 0.339 | 0.318 |          |       |  | GPRASP1  | TSS1500 |
| cg22500428 | 12 | 4,381,882   | 0.025835 | 0.338 | 0.205 |          |       |  | CCND2    | TSS1500 |
| cg20691205 | 13 | 36,919,674  | 0.017207 | 0.338 | 0.398 |          |       |  | SPG20    | 5'UTR   |
| cg07815287 | 2  | 9,345,967   | 1.02E-13 | 0.338 | 0.376 |          |       |  | ASAP2    | TSS1500 |
| cg14025053 | 8  | 104,153,637 | 1.23E-05 | 0.338 | 0.357 |          |       |  | C8orf56  | TSS200  |
| cg19380001 | 1  | 50,889,427  | 0.000626 | 0.338 | 0.306 |          |       |  | DMRTA2   | TSS1500 |
| cg13303553 | 1  | 33,938,226  | 0.022926 | 0.338 | 0.336 |          |       |  | ZSCAN20  | TSS200  |
| cg03554749 | 4  | 85,405,132  | 7.17E-06 | 0.338 | 0.306 |          |       |  |          |         |
| cg00301660 | 8  | 49,783,269  | 4.98E-20 | 0.338 | 0.331 |          |       |  |          |         |
| cg25440811 | 5  | 149,535,765 | 4.18E-06 | 0.338 | 0.358 |          |       |  | PDGFRB   | TSS1500 |
| cg26994377 | 4  | 140,579,069 | 1.44E-07 | 0.338 | 0.338 |          |       |  |          |         |
| cg17852385 | 15 | 75,019,188  | 4.64E-13 | 0.338 | 0.294 |          |       |  | CYP1A1   | TSS1500 |
| cg09745430 | 6  | 91,004,452  | 5.23E-13 | 0.338 | 0.289 |          |       |  | BACH2    | 5'UTR   |
| cg07483811 | 18 | 2,846,237   | 5.94E-12 | 0.338 | 0.271 |          |       |  | EMILIN2  | TSS1500 |
| cg12591770 | 15 | 100,913,571 | 3.46E-11 | 0.338 | 0.329 |          |       |  |          |         |
| cg01316378 | 10 | 63,629,580  | 0.019017 | 0.338 | 0.267 |          |       |  |          |         |
| cg02407266 | 10 | 79,637,979  | 3.03E-05 | 0.338 | 0.358 |          |       |  | DLG5     | Body    |
| cg01228355 | 4  | 47,839,876  | 0.000388 | 0.338 | 0.304 |          |       |  | CORIN    | Body    |
| cg05140648 | 12 | 49,391,920  | 5.66E-05 | 0.338 | 0.440 |          |       |  | DDN      | Body    |
| cg16751493 | 2  | 242,101,289 | 1.55E-08 | 0.338 | 0.342 |          |       |  | PPP1R7   | Body    |
| cg17639394 | 6  | 29,943,480  | 2E-08    | 0.338 | 0.341 |          |       |  | HCG9     | Body    |
| cg08077337 | 2  | 202,900,063 | 0.000201 | 0.338 | 0.369 |          |       |  | FZD7     | 1stExon |
| cg02363950 | 1  | 156,676,793 | 4.81E-20 | 0.338 | 0.316 |          |       |  | CRABP2   | TSS1500 |
| cg18328334 | 2  | 218,808,652 | 1.93E-27 | 0.338 | 0.321 | 6.45E-32 | 0.267 |  | TNS1     | 1stExon |
| cg07875385 | 2  | 190,044,601 | 4.05E-06 | 0.338 | 0.314 |          |       |  | COL5A2   | 1stExon |
| cg13398482 | 9  | 96,715,256  | 4.18E-09 | 0.338 | 0.389 |          |       |  | BARX1    | Body    |
| cg02674352 | 11 | 61,275,826  | 5.48E-08 | 0.338 | 0.275 |          |       |  | LRRC10B  | TSS1500 |
| cg18336453 | 6  | 43,082,296  | 1.63E-36 | 0.338 | 0.324 |          |       |  | PTK7     | Body    |
| cg24549507 | 6  | 3,752,754   | 2.8E-11  | 0.338 | 0.307 | 1.77E-27 | 0.234 |  | C6orf145 | TSS1500 |

|            |    |             |          |       |       |  |  |  |                 |         |
|------------|----|-------------|----------|-------|-------|--|--|--|-----------------|---------|
| cg00926894 | X  | 46,938,229  | 5.69E-11 | 0.338 | 0.337 |  |  |  | <i>RGN</i>      | 5'UTR   |
| cg00172597 | 1  | 223,538,379 | 0.002005 | 0.338 | 0.174 |  |  |  | <i>SUSD4</i>    | TSS1500 |
| cg18454133 | 14 | 23,835,870  | 1.21E-20 | 0.338 | 0.350 |  |  |  | <i>EFS</i>      | TSS1500 |
| cg04554652 | 10 | 103,880,979 | 4.16E-09 | 0.338 | 0.308 |  |  |  | <i>LDB1</i>     | TSS1500 |
| cg02486253 | 17 | 55,122,828  | 6.28E-06 | 0.338 | 0.349 |  |  |  | <i>RNF126P1</i> | TSS200  |
| cg24383056 | 17 | 48,071,706  | 0.000759 | 0.338 | 0.258 |  |  |  | <i>DLX3</i>     | Body    |
| cg19066273 | 17 | 37,366,365  | 0.000238 | 0.338 | 0.291 |  |  |  |                 |         |
| cg22053945 | 17 | 46,651,360  | 8.66E-10 | 0.338 | 0.330 |  |  |  | <i>HOXB3</i>    | 5'UTR   |
| cg07560510 | 8  | 86,350,592  | 2.07E-09 | 0.338 | 0.357 |  |  |  | <i>CA3</i>      | TSS1500 |
| cg04228709 | 6  | 155,537,930 | 3.12E-16 | 0.338 | 0.313 |  |  |  | <i>TIAM2</i>    | Body    |
| cg07931391 | 13 | 100,608,263 | 6.38E-05 | 0.338 | 0.321 |  |  |  |                 |         |
| cg24053514 | 1  | 146,556,859 | 1.68E-12 | 0.338 | 0.297 |  |  |  |                 |         |
| cg05743885 | 7  | 27,196,365  | 5E-10    | 0.338 | 0.349 |  |  |  | <i>HOXA7</i>    | TSS200  |
| cg12174804 | 8  | 18,244,861  | 1.59E-10 | 0.337 | 0.327 |  |  |  |                 |         |
| cg23614791 | 12 | 81,471,754  | 0.002371 | 0.337 | 0.367 |  |  |  | <i>ACSS3</i>    | TSS200  |
| cg11256607 | 1  | 58,716,306  | 7.49E-12 | 0.337 | 0.317 |  |  |  | <i>DAB1</i>     | TSS200  |
| cg21935981 | 22 | 45,608,465  | 2.95E-07 | 0.337 | 0.295 |  |  |  | <i>C22orf9</i>  | Body    |
| cg12408990 | 5  | 179,634,671 | 4.15E-22 | 0.337 | 0.326 |  |  |  | <i>RASGEF1C</i> | 5'UTR   |
| cg16019142 | 6  | 30,418,900  | 1.59E-06 | 0.337 | 0.325 |  |  |  |                 |         |
| cg07492240 | 4  | 121,994,123 | 1.35E-11 | 0.337 | 0.280 |  |  |  | <i>C4orf31</i>  | TSS1500 |
| cg18065318 | 4  | 140,201,433 | 0.000431 | 0.337 | 0.287 |  |  |  | <i>C4orf49</i>  | 5'UTR   |
| cg25598159 | 12 | 111,127,533 | 5.56E-19 | 0.337 | 0.311 |  |  |  | <i>HVCN1</i>    | 1stExon |
| cg27150417 | 20 | 44,462,035  | 7.1E-22  | 0.337 | 0.290 |  |  |  | <i>SNX21</i>    | TSS1500 |
| cg16585234 | 1  | 25,944,802  | 3.9E-20  | 0.337 | 0.300 |  |  |  | <i>MAN1C1</i>   | 1stExon |
| cg06866163 | 6  | 28,557,486  | 0.0008   | 0.337 | 0.275 |  |  |  |                 |         |
| cg26263234 | 3  | 26,666,060  | 0.01973  | 0.337 | 0.322 |  |  |  | <i>LRRC3B</i>   | 5'UTR   |
| cg14337614 | 17 | 70,262,836  | 4.93E-19 | 0.337 | 0.323 |  |  |  |                 |         |
| cg26205771 | 8  | 53,851,156  | 0.002348 | 0.337 | 0.407 |  |  |  | <i>NPBWR1</i>   | TSS1500 |
| cg24859236 | 1  | 9,750,213   | 5.69E-22 | 0.337 | 0.333 |  |  |  | <i>PIK3CD</i>   | 5'UTR   |
| cg01385327 | 10 | 123,356,336 | 4.31E-06 | 0.337 | 0.321 |  |  |  | <i>FGFR2</i>    | 5'UTR   |
| cg19035232 | 20 | 51,589,985  | 0.003904 | 0.337 | 0.427 |  |  |  | <i>TSHZ2</i>    | Body    |
| cg22332233 | X  | 48,897,515  | 1.57E-10 | 0.337 | 0.375 |  |  |  | <i>TFE3</i>     | Body    |
| cg02924943 | 3  | 134,125,326 | 3.73E-07 | 0.337 | 0.339 |  |  |  |                 |         |
| cg08845123 | 1  | 62,784,332  | 2.52E-07 | 0.337 | 0.372 |  |  |  | <i>KANK4</i>    | 5'UTR   |

|            |    |             |          |       |       |          |       |  |  |           |         |
|------------|----|-------------|----------|-------|-------|----------|-------|--|--|-----------|---------|
| cg01363714 | 14 | 103,655,773 | 9.17E-11 | 0.337 | 0.371 |          |       |  |  |           |         |
| cg19914919 | 2  | 161,992,878 | 4.3E-15  | 0.337 | 0.330 |          |       |  |  | TANK      | TSS1500 |
| cg03662014 | 16 | 29,086,271  | 9.44E-06 | 0.337 | 0.361 |          |       |  |  | RRN3P2    | Body    |
| cg14923157 | 19 | 17,138,063  | 0.007665 | 0.337 | 0.202 |          |       |  |  | CPAMD8    | TSS1500 |
| cg18054172 | 12 | 54,424,902  | 1.43E-15 | 0.337 | 0.283 |          |       |  |  | HOXC4     | 5'UTR   |
| cg03485694 | 12 | 3,862,473   | 0.02188  | 0.337 | 0.193 |          |       |  |  | EFCAB4B   | TSS200  |
| cg27527108 | 1  | 116,711,075 | 0.00625  | 0.337 | 0.325 |          |       |  |  |           |         |
| cg25649038 | 6  | 6,546,777   | 0.047828 | 0.337 | 0.171 |          |       |  |  | LOC285780 | Body    |
| cg06959635 | X  | 138,724,627 | 0.000377 | 0.337 | 0.329 | 7.18E-26 | 0.218 |  |  | MCF2      | 1stExon |
| cg09792926 | 16 | 49,316,053  | 0.013043 | 0.337 | 0.415 |          |       |  |  | CBLN1     | TSS1500 |
| cg12894325 | 11 | 67,418,113  | 1.48E-32 | 0.337 | 0.323 |          |       |  |  | ACY3      | 5'UTR   |
| cg02164046 | 3  | 187,388,148 | 0.000986 | 0.337 | 0.269 | 8.17E-19 | 0.238 |  |  | SST       | 1stExon |
| cg05245533 | 16 | 795,877     | 0.000151 | 0.337 | 0.409 |          |       |  |  |           |         |
| cg03702236 | 5  | 9,546,755   | 1.22E-07 | 0.337 | 0.255 | 1.11E-20 | 0.263 |  |  | SEMA5A    | TSS1500 |
| cg00914041 | 8  | 91,997,810  | 4.56E-05 | 0.337 | 0.336 |          |       |  |  |           |         |
| cg10043865 | 17 | 35,294,481  | 0.031401 | 0.337 | 0.359 |          |       |  |  | LHX1      | TSS200  |
| cg22794704 | 2  | 162,273,437 | 0.017715 | 0.337 | 0.339 |          |       |  |  | TBR1      | 1stExon |
| cg22084642 | 3  | 52,351,963  | 0.001945 | 0.337 | 0.347 |          |       |  |  | DNAH1     | 5'UTR   |
| cg07222505 | 5  | 74,161,231  | 0.000975 | 0.336 | 0.144 |          |       |  |  | FAM169A   | 5'UTR   |
| cg13568106 | 17 | 26,835,115  | 9.34E-05 | 0.336 | 0.321 |          |       |  |  |           |         |
| cg26330416 | 11 | 62,691,066  | 1.39E-07 | 0.336 | 0.321 |          |       |  |  |           |         |
| cg00596048 | 1  | 41,847,267  | 6.54E-05 | 0.336 | 0.150 |          |       |  |  |           |         |
| cg15910208 | 19 | 51,522,588  | 9.66E-05 | 0.336 | 0.343 | 1.68E-28 | 0.262 |  |  | KLK10     | 5'UTR   |
| cg02712145 | 7  | 30,722,433  | 1.02E-07 | 0.336 | 0.362 |          |       |  |  | CRHR2     | TSS1500 |
| cg14288235 | 9  | 135,036,556 | 3.49E-23 | 0.336 | 0.317 |          |       |  |  | NTNG2     | TSS1500 |
| cg11216064 | 5  | 50,263,586  | 0.012209 | 0.336 | 0.333 |          |       |  |  |           |         |
| cg25062539 | 8  | 79,718,482  | 3.57E-19 | 0.336 | 0.347 |          |       |  |  | IL7       | TSS1500 |
| cg10498502 | 3  | 185,928,164 | 9.16E-26 | 0.336 | 0.314 |          |       |  |  | DGKG      | Body    |
| cg06612088 | 5  | 11,589,016  | 9.06E-12 | 0.336 | 0.329 |          |       |  |  | CTNND2    | Body    |
| cg08967106 | 17 | 35,014,412  | 0.026521 | 0.336 | 0.308 |          |       |  |  |           |         |
| cg12647497 | 1  | 110,210,265 | 4.94E-19 | 0.336 | 0.297 |          |       |  |  | GSTM2     | TSS1500 |
| cg18881778 | 12 | 120,241,287 | 1.62E-17 | 0.336 | 0.331 |          |       |  |  | CIT       | Body    |
| cg25792518 | 17 | 48,545,950  | 7.69E-17 | 0.336 | 0.324 |          |       |  |  | ACSF2     | Body    |
| cg00354572 | 12 | 81,471,419  | 1.69E-07 | 0.336 | 0.300 | 8.25E-17 | 0.156 |  |  | ACSS3     | TSS1500 |



|            |    |             |          |       |       |          |       |  |                  |         |
|------------|----|-------------|----------|-------|-------|----------|-------|--|------------------|---------|
| cg20408693 | 12 | 46,767,289  | 1.02E-07 | 0.336 | 0.328 |          |       |  | <i>SLC38A2</i>   | TSS1500 |
| cg07793207 | 10 | 95,517,529  | 2.59E-07 | 0.336 | 0.332 |          |       |  | <i>LGI1</i>      | TSS200  |
| cg02909711 | 16 | 67,360,805  | 0.012348 | 0.336 | 0.255 |          |       |  | <i>LRRC36</i>    | 1stExon |
| cg02584756 | 1  | 43,533,796  | 6E-07    | 0.336 | 0.262 |          |       |  |                  |         |
| cg08519905 | 12 | 6,308,774   | 9.98E-19 | 0.336 | 0.305 | 1.34E-17 | 0.198 |  | <i>CD9</i>       | TSS1500 |
| cg10304922 | 12 | 133,065,924 | 0.004708 | 0.336 | 0.301 |          |       |  | <i>FBRSL1</i>    | TSS1500 |
| cg18912160 | 10 | 3,281,074   | 5.23E-14 | 0.336 | 0.310 |          |       |  |                  |         |
| cg16262614 | 3  | 133,464,971 | 7.62E-06 | 0.336 | 0.256 |          |       |  | <i>TF</i>        | TSS200  |
| cg05106294 | 11 | 12,031,097  | 0.012768 | 0.336 | 0.315 |          |       |  | <i>DKK3</i>      | TSS1500 |
| cg13990926 | 12 | 54,133,447  | 0.001089 | 0.336 | 0.254 |          |       |  |                  |         |
| cg12290635 | X  | 119,148,809 | 4.73E-11 | 0.336 | 0.296 |          |       |  |                  |         |
| cg12506005 | 11 | 111,411,176 | 3.93E-06 | 0.336 | 0.314 |          |       |  | <i>LAYN</i>      | TSS200  |
| cg03234186 | 19 | 58,220,657  | 2.16E-10 | 0.336 | 0.301 |          |       |  | <i>ZNF154</i>    | TSS200  |
| cg11855325 | 7  | 30,029,717  | 0.011348 | 0.336 | 0.202 |          |       |  | <i>SCRN1</i>     | TSS1500 |
| cg00155310 | 6  | 50,814,011  | 3.14E-10 | 0.336 | 0.381 |          |       |  | <i>TFAP2B</i>    | 3'UTR   |
| cg15659132 | 6  | 26,577,336  | 0.000178 | 0.336 | 0.377 |          |       |  |                  |         |
| cg20899581 | 6  | 27,841,230  | 1.09E-10 | 0.336 | 0.320 |          |       |  | <i>HIST1H4L</i>  | 1stExon |
| cg11646762 | 5  | 68,180,149  | 2.45E-21 | 0.336 | 0.328 |          |       |  |                  |         |
| cg12829141 | 7  | 128,000,780 | 0.000591 | 0.336 | 0.375 |          |       |  | <i>PRRT4</i>     | 5'UTR   |
| cg01537995 | 14 | 85,996,352  | 8.09E-10 | 0.336 | 0.346 |          |       |  | <i>FLRT2</i>     | TSS200  |
| cg10331424 | 16 | 70,696,450  | 4.86E-49 | 0.336 | 0.338 |          |       |  | <i>MTSS1L</i>    | 3'UTR   |
| cg18940843 | 6  | 30,418,773  | 1.24E-07 | 0.336 | 0.282 |          |       |  |                  |         |
| cg02644510 | 7  | 121,946,608 | 3.72E-07 | 0.336 | 0.373 |          |       |  |                  |         |
| cg24281267 | 6  | 35,479,648  | 0.006355 | 0.336 | 0.379 |          |       |  | <i>TULP1</i>     | Body    |
| cg11724135 | 20 | 25,129,507  | 3.53E-09 | 0.336 | 0.286 |          |       |  | <i>LOC284798</i> | TSS1500 |
| cg07437373 | 3  | 134,125,814 | 7.33E-14 | 0.336 | 0.332 |          |       |  |                  |         |
| cg12319534 | 4  | 54,959,841  | 9.95E-13 | 0.336 | 0.339 |          |       |  |                  |         |
| cg22202692 | 2  | 6,121,939   | 0.000115 | 0.336 | 0.354 |          |       |  | <i>LOC400940</i> | TSS200  |
| cg09657963 | 11 | 124,790,875 | 0.02951  | 0.336 | 0.241 |          |       |  | <i>HEPACAM</i>   | 3'UTR   |
| cg17538572 | 10 | 94,834,763  | 0.000749 | 0.336 | 0.193 |          |       |  | <i>CYP26A1</i>   | Body    |
| cg17935217 | 21 | 36,042,170  | 0.002315 | 0.335 | 0.290 |          |       |  | <i>CLIC6</i>     | 1stExon |
| cg14610403 | 1  | 66,998,812  | 1E-05    | 0.335 | 0.238 |          |       |  | <i>SGIP1</i>     | TSS1500 |
| cg00878038 | 7  | 151,107,807 | 2.55E-06 | 0.335 | 0.367 |          |       |  | <i>WDR86</i>     | TSS1500 |
| cg05209996 | 11 | 76,033,054  | 0.000119 | 0.335 | 0.313 |          |       |  |                  |         |

|            |    |             |          |       |       |          |       |  |                 |         |
|------------|----|-------------|----------|-------|-------|----------|-------|--|-----------------|---------|
| cg06971418 | 17 | 41,995,241  | 1.82E-05 | 0.335 | 0.365 |          |       |  | <i>C17orf88</i> | Body    |
| cg15229747 | 19 | 56,097,663  | 0.00107  | 0.335 | 0.205 |          |       |  |                 |         |
| cg24800655 | 12 | 133,065,941 | 0.001953 | 0.335 | 0.260 |          |       |  | <i>FBRSL1</i>   | TSS1500 |
| cg01385959 | 2  | 190,119,363 | 1.01E-12 | 0.335 | 0.314 |          |       |  |                 |         |
| cg19467964 | 17 | 80,806,135  | 0.000492 | 0.335 | 0.393 |          |       |  | <i>TBCD</i>     | Body    |
| cg23204908 | 11 | 9,824,185   | 3.07E-18 | 0.335 | 0.329 |          |       |  | <i>SBF2</i>     | Body    |
| cg11691298 | 2  | 26,396,787  | 5.3E-06  | 0.335 | 0.325 |          |       |  | <i>FAM59B</i>   | Body    |
| cg27336068 | 10 | 1,336,103   | 3.93E-06 | 0.335 | 0.375 |          |       |  | <i>ADARB2</i>   | Body    |
| cg10706039 | X  | 119,134,323 | 0.000612 | 0.335 | 0.279 |          |       |  |                 |         |
| cg21557231 | X  | 138,725,077 | 1.61E-08 | 0.335 | 0.347 | 3.84E-20 | 0.223 |  | <i>MCF2</i>     | TSS200  |
| cg10941747 | 20 | 55,841,898  | 0.030229 | 0.335 | 0.196 |          |       |  | <i>BMP7</i>     | TSS200  |
| cg08482436 | 7  | 96,647,888  | 2.86E-08 | 0.335 | 0.328 |          |       |  |                 |         |
| cg14825976 | 18 | 13,611,370  | 7.31E-06 | 0.335 | 0.310 |          |       |  | <i>C18orf1</i>  | TSS1500 |
| cg16400631 | 1  | 91,300,215  | 0.03905  | 0.335 | 0.465 |          |       |  |                 |         |
| cg19372602 | 1  | 156,116,207 | 1.92E-24 | 0.335 | 0.336 |          |       |  |                 |         |
| cg26503877 | 11 | 128,391,429 | 1.26E-05 | 0.335 | 0.303 |          |       |  | <i>ETS1</i>     | Body    |
| cg06782090 | 17 | 77,787,880  | 5.27E-07 | 0.335 | 0.286 |          |       |  |                 |         |
| cg01446627 | 10 | 1,508,061   | 3.93E-08 | 0.335 | 0.256 |          |       |  | <i>ADARB2</i>   | Body    |
| cg01338255 | 20 | 30,176,054  | 1.68E-13 | 0.335 | 0.286 |          |       |  |                 |         |
| cg14121845 | 20 | 25,566,513  | 0.000123 | 0.335 | 0.221 |          |       |  | <i>NINL</i>     | TSS1500 |
| cg13354872 | 15 | 65,550,813  | 1.96E-21 | 0.335 | 0.338 |          |       |  | <i>PARP16</i>   | 3'UTR   |
| cg02776659 | 21 | 47,717,406  | 1.61E-08 | 0.335 | 0.296 |          |       |  | <i>C21orf57</i> | Body    |
| cg14966613 | 22 | 25,423,700  | 1.18E-15 | 0.335 | 0.363 |          |       |  | <i>KIAA1671</i> | TSS1500 |
| cg27022933 | 11 | 67,418,106  | 4.61E-21 | 0.335 | 0.324 |          |       |  | <i>ACY3</i>     | 5'UTR   |
| cg06530338 | 2  | 19,561,612  | 5.21E-07 | 0.335 | 0.305 |          |       |  |                 |         |
| cg07691152 | 12 | 103,355,123 | 0.000262 | 0.335 | 0.344 |          |       |  |                 |         |
| cg01571001 | 3  | 128,215,433 | 2.27E-55 | 0.335 | 0.323 |          |       |  |                 |         |
| cg16331929 | 4  | 185,937,863 | 1.62E-07 | 0.334 | 0.312 |          |       |  |                 |         |
| cg13946341 | 9  | 128,799,328 | 1.44E-09 | 0.334 | 0.292 |          |       |  |                 |         |
| cg05163709 | Y  | 7,141,248   | 1.09E-07 | 0.334 | 0.246 |          |       |  | <i>PRKY</i>     | TSS1500 |
| cg12857638 | 11 | 62,212,169  | 1.04E-09 | 0.334 | 0.344 |          |       |  | <i>AHNAK</i>    | Body    |
| cg00397635 | 1  | 53,309,162  | 2.16E-05 | 0.334 | 0.313 |          |       |  | <i>ZYG11A</i>   | Body    |
| cg18720905 | 2  | 96,990,858  | 9.32E-10 | 0.334 | 0.334 |          |       |  | <i>ITPRIPL1</i> | TSS1500 |
| cg04514123 | 16 | 2,041,225   | 4.86E-05 | 0.334 | 0.410 |          |       |  | <i>SYNGR3</i>   | Body    |

|            |    |             |          |       |       |  |  |  |                  |         |
|------------|----|-------------|----------|-------|-------|--|--|--|------------------|---------|
| cg19646112 | 14 | 24,804,342  | 9.39E-09 | 0.334 | 0.341 |  |  |  | <i>ADCY4</i>     | TSS1500 |
| cg09085216 | 1  | 204,329,081 | 3.87E-27 | 0.334 | 0.317 |  |  |  | <i>PLEKHA6</i>   | TSS200  |
| cg00735923 | 7  | 117,119,963 | 2.01E-06 | 0.334 | 0.326 |  |  |  | <i>CFTR</i>      | TSS200  |
| cg02518216 | 12 | 106,533,903 | 2.76E-24 | 0.334 | 0.306 |  |  |  | <i>NUAK1</i>     | TSS200  |
| cg09079818 | 7  | 155,604,091 | 2.41E-06 | 0.334 | 0.201 |  |  |  | <i>SHH</i>       | Body    |
| cg10227331 | 1  | 8,181,647   | 7.63E-24 | 0.334 | 0.323 |  |  |  |                  |         |
| cg15552249 | 4  | 88,450,824  | 1.57E-21 | 0.334 | 0.337 |  |  |  | <i>SPARCL1</i>   | TSS200  |
| cg18879590 | 1  | 236,306,640 | 0.000821 | 0.334 | 0.229 |  |  |  | <i>GPR137B</i>   | Body    |
| cg05527869 | 17 | 35,294,476  | 0.018613 | 0.334 | 0.332 |  |  |  | <i>LHX1</i>      | TSS200  |
| cg05622465 | 1  | 110,613,072 | 2.43E-07 | 0.334 | 0.329 |  |  |  | <i>ALX3</i>      | 1stExon |
| cg11458217 | X  | 134,125,022 | 0.000141 | 0.334 | 0.323 |  |  |  | <i>LOC644538</i> | 1stExon |
| cg12989128 | 20 | 42,875,933  | 3.8E-06  | 0.334 | 0.279 |  |  |  | <i>GDAP1L1</i>   | 5'UTR   |
| cg14709253 | 8  | 17,519,419  | 1.58E-08 | 0.334 | 0.290 |  |  |  | <i>MTUS1</i>     | Body    |
| cg06460869 | 10 | 17,270,094  | 8.48E-05 | 0.334 | 0.329 |  |  |  | <i>VIM</i>       | TSS200  |
| cg00555905 | 17 | 79,140,481  | 9.03E-06 | 0.334 | 0.250 |  |  |  | <i>AATK</i>      | TSS1500 |
| cg05905176 | 15 | 51,385,916  | 0.006877 | 0.334 | 0.401 |  |  |  | <i>TNFAIP8L3</i> | Body    |
| cg23829024 | 6  | 26,018,074  | 0.001477 | 0.334 | 0.285 |  |  |  | <i>HIST1H1A</i>  | TSS200  |
| cg08887400 | 6  | 30,652,376  | 9.89E-09 | 0.334 | 0.330 |  |  |  | <i>KIAA1949</i>  | Body    |
| cg09706021 | 6  | 33,399,109  | 2.64E-32 | 0.334 | 0.330 |  |  |  | <i>SYNGAP1</i>   | Body    |
| cg18813545 | 3  | 9,167,185   | 4.95E-24 | 0.334 | 0.326 |  |  |  | <i>SRGAP3</i>    | Body    |
| cg11994674 | 17 | 47,547,767  | 5.06E-17 | 0.334 | 0.352 |  |  |  |                  |         |
| cg05005609 | 11 | 57,250,204  | 3.64E-13 | 0.334 | 0.340 |  |  |  |                  |         |
| cg16855845 | 19 | 12,991,665  | 0.003105 | 0.334 | 0.147 |  |  |  | <i>DNASE2</i>    | Body    |
| cg22387369 | 15 | 85,360,691  | 9.54E-11 | 0.334 | 0.330 |  |  |  | <i>ALPK3</i>     | 1stExon |
| cg17466795 | 20 | 9,497,330   | 8.21E-09 | 0.334 | 0.333 |  |  |  | <i>C20orf103</i> | Body    |
| cg06572465 | 5  | 140,800,929 | 1.34E-05 | 0.334 | 0.376 |  |  |  | <i>PCDHGA4</i>   | Body    |
| cg08664487 | 6  | 56,818,409  | 3.96E-08 | 0.334 | 0.326 |  |  |  | <i>BEND6</i>     | TSS1500 |
| cg24446178 | 12 | 100,750,702 | 1.05E-06 | 0.334 | 0.301 |  |  |  | <i>SLC17A8</i>   | TSS200  |
| cg07481320 | 6  | 42,739,021  | 1.5E-32  | 0.334 | 0.309 |  |  |  |                  |         |
| cg08963132 | 3  | 130,064,261 | 1.58E-05 | 0.334 | 0.231 |  |  |  | <i>COL29A1</i>   | TSS200  |
| cg02374745 | 17 | 6,679,564   | 3.74E-05 | 0.334 | 0.252 |  |  |  | <i>FBXO39</i>    | 1stExon |
| cg16909733 | 2  | 241,459,847 | 7.31E-13 | 0.334 | 0.307 |  |  |  | <i>ANKMY1</i>    | Body    |
| cg10913846 | 14 | 37,133,714  | 8.07E-05 | 0.334 | 0.202 |  |  |  | <i>PAX9</i>      | Body    |
| cg04188862 | 15 | 88,801,474  | 2.14E-08 | 0.334 | 0.330 |  |  |  |                  |         |

|            |    |             |          |       |       |  |  |     |                     |         |
|------------|----|-------------|----------|-------|-------|--|--|-----|---------------------|---------|
| cg08192350 | 12 | 3,862,417   | 0.003002 | 0.334 | 0.238 |  |  |     | <i>EFCAB4B</i>      | TSS200  |
| cg01442843 | 1  | 206,729,040 | 3E-26    | 0.334 | 0.302 |  |  |     | <i>RASSF5</i>       | Body    |
| cg04306024 | 1  | 54,203,844  | 1.48E-05 | 0.334 | 0.316 |  |  | Yes |                     |         |
| cg13575161 | 12 | 4,381,792   | 0.000598 | 0.334 | 0.273 |  |  |     | <i>CCND2</i>        | TSS1500 |
| cg02991469 | 20 | 50,720,731  | 3.3E-07  | 0.334 | 0.347 |  |  |     | <i>ZFP64</i>        | Body    |
| cg17199800 | 7  | 96,632,777  | 3.41E-05 | 0.334 | 0.366 |  |  |     | <i>DLX6AS</i>       | Body    |
| cg17401179 | 5  | 400,517     | 2.56E-05 | 0.334 | 0.383 |  |  |     | <i>AHRR</i>         | Body    |
| cg19736094 | X  | 38,080,327  | 2.72E-06 | 0.334 | 0.286 |  |  |     | <i>SRPX</i>         | TSS200  |
| cg11935248 | 6  | 4,942,483   | 1.04E-11 | 0.333 | 0.343 |  |  |     | <i>CDYL</i>         | Body    |
| cg27505047 | X  | 133,684,884 | 0.000628 | 0.333 | 0.285 |  |  |     |                     |         |
| cg24812837 | 10 | 102,894,120 | 0.000517 | 0.333 | 0.314 |  |  |     | <i>TLX1</i>         | Body    |
| cg27134365 | 14 | 24,458,004  | 3.9E-50  | 0.333 | 0.330 |  |  |     | <i>DHRS4L2</i>      | TSS200  |
| cg19858576 | 5  | 191,806     | 5.23E-20 | 0.333 | 0.315 |  |  |     | <i>LRRC14B</i>      | 1stExon |
| cg21141024 | 14 | 59,422,098  | 5.91E-06 | 0.333 | 0.267 |  |  |     |                     |         |
| cg12111309 | 4  | 57,624,039  | 4.41E-10 | 0.333 | 0.304 |  |  |     |                     |         |
| cg23842796 | 1  | 156,358,404 | 0.005307 | 0.333 | 0.196 |  |  |     |                     |         |
| cg20734421 | 12 | 14,720,805  | 1.36E-08 | 0.333 | 0.252 |  |  |     | <i>PLBD1</i>        | TSS200  |
| cg07374509 | 6  | 30,419,070  | 0.00029  | 0.333 | 0.365 |  |  |     |                     |         |
| cg15536165 | 11 | 35,639,492  | 6.13E-06 | 0.333 | 0.253 |  |  |     | <i>FJX1</i>         | TSS1500 |
| cg22280475 | 8  | 25,897,534  | 5.47E-09 | 0.333 | 0.310 |  |  |     | <i>EBF2</i>         | Body    |
| cg25864762 | 7  | 1,850,388   | 3.43E-11 | 0.333 | 0.331 |  |  |     |                     |         |
| cg11278506 | 3  | 72,787,955  | 3.09E-06 | 0.333 | 0.242 |  |  |     |                     |         |
| cg02680669 | 8  | 40,181,105  | 3.02E-12 | 0.333 | 0.349 |  |  |     |                     |         |
| cg00422638 | 10 | 25,466,027  | 8.49E-05 | 0.333 | 0.327 |  |  |     | <i>LOC100128811</i> | TSS1500 |
| cg01346013 | 17 | 74,836,383  | 2.35E-09 | 0.333 | 0.360 |  |  |     |                     |         |
| cg05931423 | 5  | 115,697,214 | 8.78E-16 | 0.333 | 0.345 |  |  |     |                     |         |
| cg26288577 | 14 | 91,580,429  | 0.009932 | 0.333 | 0.147 |  |  |     | <i>C14orf159</i>    | 1stExon |
| cg11756518 | 6  | 107,809,929 | 2.24E-06 | 0.333 | 0.251 |  |  |     | <i>SOBP</i>         | TSS1500 |
| cg16754467 | 6  | 10,426,588  | 1.18E-08 | 0.333 | 0.337 |  |  |     |                     |         |
| cg01308827 | 19 | 36,132,627  | 5.44E-07 | 0.333 | 0.340 |  |  |     | <i>ETV2</i>         | TSS200  |
| cg23267759 | 18 | 19,751,335  | 3.08E-07 | 0.333 | 0.321 |  |  |     | <i>GATA6</i>        | Body    |
| cg00087244 | 7  | 74,042,487  | 9.13E-19 | 0.333 | 0.334 |  |  |     |                     |         |
| cg23958524 | 3  | 9,289,787   | 3.84E-08 | 0.333 | 0.223 |  |  |     | <i>SRGAP3</i>       | Body    |
| cg06866938 | 22 | 46,934,811  | 6.76E-10 | 0.333 | 0.324 |  |  |     |                     |         |

|            |    |             |          |       |       |          |       |  |                |         |
|------------|----|-------------|----------|-------|-------|----------|-------|--|----------------|---------|
| cg22370379 | 6  | 32,223,090  | 3.16E-05 | 0.333 | 0.340 |          |       |  |                |         |
| cg25806307 | 19 | 39,466,182  | 0.008444 | 0.333 | 0.368 |          |       |  | <i>FBXO17</i>  | 5'UTR   |
| cg16201038 | 13 | 28,544,760  | 3.26E-08 | 0.333 | 0.297 |          |       |  | <i>CDX2</i>    | TSS1500 |
| cg09453076 | 2  | 235,406,275 | 1.17E-31 | 0.333 | 0.325 |          |       |  | <i>ARL4C</i>   | TSS1500 |
| cg01777397 | 2  | 29,337,946  | 9.47E-08 | 0.333 | 0.264 | 1.19E-32 | 0.278 |  | <i>CLIP4</i>   | TSS1500 |
| cg12147198 | 4  | 47,838,169  | 3.54E-16 | 0.333 | 0.292 |          |       |  | <i>CORIN</i>   | Body    |
| cg19308375 | 2  | 228,324,937 | 2.74E-20 | 0.333 | 0.332 |          |       |  |                |         |
| cg10382221 | 17 | 46,114,672  | 8.85E-07 | 0.333 | 0.323 |          |       |  | <i>MIR152</i>  | TSS200  |
| cg21056706 | 7  | 139,929,714 | 0.00035  | 0.333 | 0.279 |          |       |  |                |         |
| cg02806452 | 2  | 233,499,070 | 1.1E-05  | 0.333 | 0.307 |          |       |  | <i>EFHD1</i>   | Body    |
| cg14196225 | 4  | 57,522,762  | 0.000313 | 0.333 | 0.311 |          |       |  | <i>HOPX</i>    | 5'UTR   |
| cg10143811 | 12 | 16,757,985  | 2.82E-05 | 0.333 | 0.272 |          |       |  | <i>LMO3</i>    | 5'UTR   |
| cg04543008 | 11 | 71,955,332  | 0.001084 | 0.333 | 0.321 |          |       |  | <i>PHOX2A</i>  | TSS200  |
| cg15867125 | 14 | 77,624,538  | 4.13E-09 | 0.333 | 0.354 |          |       |  |                |         |
| cg09662034 | 20 | 55,206,467  | 0.001743 | 0.333 | 0.226 |          |       |  | <i>TFAP2C</i>  | Body    |
| cg26163458 | 13 | 95,620,976  | 1.46E-05 | 0.333 | 0.295 |          |       |  |                |         |
| cg08757924 | 4  | 85,306,687  | 4.39E-10 | 0.333 | 0.319 |          |       |  |                |         |
| cg11961138 | 17 | 38,599,366  | 2.62E-26 | 0.333 | 0.316 |          |       |  | <i>IGFBP4</i>  | TSS1500 |
| cg13708158 | 12 | 116,037,223 | 1.39E-06 | 0.333 | 0.275 |          |       |  |                |         |
| cg04669815 | 10 | 101,296,619 | 4.19E-06 | 0.333 | 0.355 |          |       |  |                |         |
| cg15688619 | 3  | 44,626,860  | 4.27E-15 | 0.333 | 0.291 |          |       |  | <i>ZNF660</i>  | 5'UTR   |
| cg08268017 | 8  | 94,712,118  | 6.8E-09  | 0.332 | 0.288 |          |       |  | <i>FAM92A1</i> | TSS1500 |
| cg24389730 | 17 | 46,114,615  | 1.86E-06 | 0.332 | 0.336 |          |       |  | <i>MIR152</i>  | TSS200  |
| cg14428146 | 8  | 23,563,925  | 3.21E-05 | 0.332 | 0.325 |          |       |  | <i>NKX2-6</i>  | TSS200  |
| cg14350382 | 9  | 133,320,728 | 0.003607 | 0.332 | 0.219 |          |       |  | <i>ASS1</i>    | 5'UTR   |
| cg25410739 | 1  | 223,743,086 | 4.05E-11 | 0.332 | 0.311 |          |       |  | <i>CAPN8</i>   | Body    |
| cg24137543 | 5  | 140,893,634 | 2.2E-11  | 0.332 | 0.327 |          |       |  |                |         |
| cg18245160 | 7  | 27,244,370  | 0.010486 | 0.332 | 0.424 |          |       |  |                |         |
| cg14348741 | 9  | 139,880,223 | 6.81E-06 | 0.332 | 0.347 |          |       |  |                |         |
| cg15948536 | 4  | 169,770,092 | 3.31E-12 | 0.332 | 0.319 |          |       |  | <i>PALLD</i>   | 5'UTR   |
| cg08637618 | 7  | 27,279,329  | 9.29E-09 | 0.332 | 0.291 |          |       |  |                |         |
| cg12117658 | 17 | 56,406,294  | 3.21E-05 | 0.332 | 0.335 |          |       |  | <i>BZRAP1</i>  | TSS200  |
| cg18456523 | 5  | 54,516,805  | 0.000226 | 0.332 | 0.335 |          |       |  |                |         |
| cg11331445 | 12 | 47,219,877  | 7.53E-08 | 0.332 | 0.311 |          |       |  | <i>SLC38A4</i> | TSS200  |

|            |    |             |          |       |       |          |       |  |                 |         |
|------------|----|-------------|----------|-------|-------|----------|-------|--|-----------------|---------|
| cg06476685 | 2  | 241,459,638 | 6.27E-15 | 0.332 | 0.312 |          |       |  | <i>ANKMY1</i>   | Body    |
| cg27049766 | 19 | 58,220,516  | 9.09E-06 | 0.332 | 0.277 |          |       |  | <i>ZNF154</i>   | 5'UTR   |
| cg14397690 | 15 | 60,688,948  | 2.15E-22 | 0.332 | 0.305 |          |       |  | <i>ANXA2</i>    | 5'UTR   |
| cg17771031 | 20 | 44,875,334  | 0.001688 | 0.332 | 0.198 |          |       |  | <i>CDH22</i>    | Body    |
| cg17344906 | 19 | 13,202,507  | 2.68E-28 | 0.332 | 0.349 |          |       |  | <i>NFIX</i>     | 3'UTR   |
| cg00063174 | 2  | 228,736,253 | 0.003145 | 0.332 | 0.425 |          |       |  | <i>WDR69</i>    | TSS200  |
| cg03989617 | 16 | 57,662,541  | 1.69E-19 | 0.332 | 0.300 |          |       |  | <i>GPR56</i>    | 5'UTR   |
| cg06815950 | 12 | 111,619,455 | 1.27E-12 | 0.332 | 0.315 |          |       |  | <i>CUX2</i>     | Body    |
| cg26707709 | 2  | 241,975,756 | 9.62E-21 | 0.332 | 0.306 |          |       |  | <i>SNED1</i>    | Body    |
| cg23536629 | 10 | 101,279,944 | 1.31E-07 | 0.332 | 0.250 |          |       |  |                 |         |
| cg20852226 | 11 | 76,859,010  | 0.002163 | 0.332 | 0.278 |          |       |  | <i>MYO7A</i>    | Body    |
| cg09183316 | 12 | 58,238,232  | 1.36E-09 | 0.332 | 0.306 |          |       |  | <i>CTDSP2</i>   | Body    |
| cg18713646 | 6  | 29,974,952  | 5.96E-11 | 0.332 | 0.324 |          |       |  | <i>HLA-J</i>    | Body    |
| cg01283289 | 12 | 81,472,177  | 9.78E-12 | 0.332 | 0.319 | 3.69E-24 | 0.214 |  | <i>ACSS3</i>    | 1stExon |
| cg02096396 | 2  | 26,395,556  | 0.002024 | 0.332 | 0.172 |          |       |  | <i>FAM59B</i>   | TSS1500 |
| cg15880846 | 6  | 28,557,424  | 0.001335 | 0.332 | 0.297 |          |       |  |                 |         |
| cg11479165 | 15 | 65,068,594  | 1.55E-18 | 0.332 | 0.327 |          |       |  | <i>RBPM2</i>    | TSS1500 |
| cg11673244 | 22 | 22,007,100  | 4.1E-25  | 0.332 | 0.321 |          |       |  | <i>MIR130B</i>  | TSS1500 |
| cg24468070 | 19 | 54,976,501  | 7.54E-09 | 0.332 | 0.352 |          |       |  | <i>CDC42EP5</i> | Body    |
| cg21695661 | 1  | 63,796,263  | 1.26E-08 | 0.332 | 0.284 |          |       |  |                 |         |
| cg00628788 | 18 | 33,529,997  | 8.01E-08 | 0.332 | 0.246 |          |       |  |                 |         |
| cg22222413 | 3  | 42,066,796  | 2.29E-16 | 0.332 | 0.306 |          |       |  |                 |         |
| cg08980711 | 10 | 98,945,025  | 1.94E-12 | 0.332 | 0.309 |          |       |  | <i>SLIT1</i>    | Body    |
| cg07485916 | 15 | 90,039,805  | 1.57E-12 | 0.332 | 0.332 |          |       |  | <i>RHCG</i>     | TSS200  |
| cg15130102 | 1  | 213,090,116 | 6.3E-10  | 0.332 | 0.332 |          |       |  |                 |         |
| cg00991875 | 6  | 161,100,376 | 0.001671 | 0.332 | 0.256 |          |       |  |                 |         |
| cg02114084 | 14 | 75,894,209  | 1.07E-09 | 0.332 | 0.245 |          |       |  | <i>JDP2</i>     | TSS1500 |
| cg06856720 | 20 | 19,870,217  | 0.011946 | 0.332 | 0.247 |          |       |  | <i>RIN2</i>     | 1stExon |
| cg17915961 | 10 | 103,881,480 | 3.07E-10 | 0.332 | 0.307 |          |       |  | <i>LDB1</i>     | TSS1500 |
| cg27358154 | 10 | 72,453,975  | 0.000197 | 0.332 | 0.243 |          |       |  | <i>ADAMTS14</i> | Body    |
| cg15696662 | 1  | 46,669,221  | 0.016662 | 0.332 | 0.499 |          |       |  | <i>C1orf190</i> | 1stExon |
| cg23627335 | 6  | 17,102,653  | 0.0072   | 0.332 | 0.116 |          |       |  |                 |         |
| cg06200244 | 2  | 12,862,337  | 6.35E-20 | 0.332 | 0.333 |          |       |  | <i>TRIB2</i>    | Body    |
| cg26262482 | 1  | 64,937,345  | 0.000268 | 0.332 | 0.310 |          |       |  | <i>CACHD1</i>   | Body    |

|            |    |             |          |       |       |  |  |  |                  |         |
|------------|----|-------------|----------|-------|-------|--|--|--|------------------|---------|
| cg13832372 | 9  | 124,983,482 | 5.46E-09 | 0.332 | 0.329 |  |  |  | <i>LHX6</i>      | Body    |
| cg23831143 | 8  | 22,960,427  | 0.001213 | 0.332 | 0.257 |  |  |  | <i>TNFRSF10C</i> | TSS200  |
| cg17763354 | 10 | 86,016,954  | 2.31E-05 | 0.332 | 0.264 |  |  |  | <i>RGR</i>       | Body    |
| cg22694191 | 19 | 19,373,575  | 1.18E-09 | 0.332 | 0.332 |  |  |  | <i>HAPLN4</i>    | 5'UTR   |
| cg21038156 | 7  | 158,936,739 | 0.000102 | 0.332 | 0.314 |  |  |  | <i>VIPR2</i>     | Body    |
| cg13670057 | 9  | 133,721,945 | 2.94E-19 | 0.331 | 0.319 |  |  |  | <i>ABL1</i>      | Body    |
| cg09031823 | 4  | 83,674,996  | 1.29E-28 | 0.331 | 0.321 |  |  |  | <i>MIR575</i>    | TSS1500 |
| cg16651537 | 19 | 51,226,536  | 0.00035  | 0.331 | 0.450 |  |  |  | <i>CLEC11A</i>   | TSS200  |
| cg03640756 | 5  | 140,864,593 | 9.55E-05 | 0.331 | 0.316 |  |  |  | <i>PCDHGA4</i>   | Body    |
| cg16792842 | 8  | 25,899,459  | 6.34E-10 | 0.331 | 0.304 |  |  |  | <i>EBF2</i>      | Body    |
| cg03536375 | 18 | 18,821,328  | 8.41E-07 | 0.331 | 0.291 |  |  |  | <i>GREB1L</i>    | TSS1500 |
| cg09661010 | 10 | 73,848,153  | 0.001529 | 0.331 | 0.129 |  |  |  | <i>SPOCK2</i>    | 5'UTR   |
| cg18016254 | 3  | 122,296,505 | 1.36E-06 | 0.331 | 0.328 |  |  |  | <i>PARP15</i>    | 5'UTR   |
| cg09509179 | 10 | 91,598,023  | 3.39E-10 | 0.331 | 0.244 |  |  |  |                  |         |
| cg15935965 | 1  | 59,550,124  | 2.4E-09  | 0.331 | 0.315 |  |  |  |                  |         |
| cg09736669 | 5  | 1,851,828   | 1.08E-11 | 0.331 | 0.311 |  |  |  |                  |         |
| cg04021697 | 1  | 3,567,303   | 0.004649 | 0.331 | 0.332 |  |  |  | <i>WDR8</i>      | TSS1500 |
| cg11574975 | 1  | 112,058,304 | 7.56E-07 | 0.331 | 0.349 |  |  |  | <i>ADORA3</i>    | Body    |
| cg20198108 | 10 | 17,270,091  | 9.53E-07 | 0.331 | 0.317 |  |  |  | <i>VIM</i>       | TSS200  |
| cg22803868 | 17 | 27,045,164  | 1.99E-18 | 0.331 | 0.328 |  |  |  | <i>RAB34</i>     | Body    |
| cg07143418 | 8  | 23,567,548  | 1.45E-07 | 0.331 | 0.312 |  |  |  |                  |         |
| cg26008908 | 12 | 120,799,332 | 1.9E-20  | 0.331 | 0.318 |  |  |  | <i>MSI1</i>      | Body    |
| cg26995992 | 16 | 87,417,792  | 0.022675 | 0.331 | 0.265 |  |  |  | <i>FBXO31</i>    | TSS1500 |
| cg11521404 | 13 | 20,735,532  | 0.032018 | 0.331 | 0.373 |  |  |  | <i>GJA3</i>      | TSS1500 |
| cg15339720 | 2  | 20,425,649  | 1.16E-29 | 0.331 | 0.299 |  |  |  | <i>SDC1</i>      | TSS1500 |
| cg07239716 | 12 | 89,744,488  | 2.06E-13 | 0.331 | 0.316 |  |  |  | <i>DUSP6</i>     | Body    |
| cg18090004 | 7  | 1,283,896   | 2.92E-09 | 0.331 | 0.294 |  |  |  |                  |         |
| cg19177125 | 18 | 19,752,414  | 1.87E-19 | 0.331 | 0.292 |  |  |  | <i>GATA6</i>     | Body    |
| cg04650654 | 6  | 28,505,429  | 0.000002 | 0.331 | 0.314 |  |  |  |                  |         |
| cg16686733 | 20 | 25,566,563  | 0.001586 | 0.331 | 0.206 |  |  |  | <i>NINL</i>      | TSS1500 |
| cg02035751 | 1  | 206,729,099 | 1.01E-27 | 0.331 | 0.298 |  |  |  | <i>RASSF5</i>    | Body    |
| cg19164987 | 12 | 54,413,000  | 2.79E-16 | 0.331 | 0.273 |  |  |  | <i>HOXC4</i>     | 5'UTR   |
| cg05461734 | 10 | 122,705,955 | 7.84E-26 | 0.331 | 0.295 |  |  |  |                  |         |
| cg21703322 | 11 | 111,411,076 | 8.94E-20 | 0.331 | 0.295 |  |  |  | <i>LAYN</i>      | TSS200  |

|            |    |             |          |       |       |  |  |  |                 |         |
|------------|----|-------------|----------|-------|-------|--|--|--|-----------------|---------|
| cg12248807 | 6  | 25,156,302  | 1.49E-15 | 0.331 | 0.341 |  |  |  |                 |         |
| cg20595752 | 6  | 35,458,416  | 7.15E-24 | 0.331 | 0.327 |  |  |  | <i>TEAD3</i>    | 5'UTR   |
| cg14346243 | 4  | 90,757,452  | 5.25E-07 | 0.331 | 0.268 |  |  |  | <i>SNCA</i>     | 5'UTR   |
| cg17504394 | 17 | 70,339,295  | 5.23E-19 | 0.331 | 0.331 |  |  |  |                 |         |
| cg03431846 | 14 | 24,641,183  | 4.74E-12 | 0.331 | 0.319 |  |  |  | <i>REC8</i>     | TSS200  |
| cg15173134 | 10 | 119,000,638 | 0.004913 | 0.331 | 0.296 |  |  |  | <i>SLC18A2</i>  | TSS200  |
| cg09040078 | 16 | 23,291,476  | 6.12E-10 | 0.331 | 0.346 |  |  |  |                 |         |
| cg20119798 | 7  | 94,954,144  | 1.79E-11 | 0.331 | 0.316 |  |  |  | <i>PON1</i>     | TSS1500 |
| cg00903676 | 6  | 26,172,091  | 7.15E-05 | 0.331 | 0.398 |  |  |  |                 |         |
| cg08858649 | 6  | 30,139,903  | 0.000228 | 0.331 | 0.351 |  |  |  | <i>TRIM15</i>   | Body    |
| cg13720581 | 6  | 32,077,017  | 1.81E-05 | 0.331 | 0.270 |  |  |  | <i>TNXB</i>     | 5'UTR   |
| cg00626702 | 4  | 1,647,016   | 1.46E-08 | 0.331 | 0.326 |  |  |  | <i>FAM53A</i>   | Body    |
| cg02602541 | 5  | 7,850,438   | 0.009414 | 0.331 | 0.458 |  |  |  | <i>C5orf49</i>  | Body    |
| cg14077898 | 12 | 100,750,695 | 3.77E-07 | 0.331 | 0.280 |  |  |  | <i>SLC17A8</i>  | TSS200  |
| cg04249706 | 10 | 11,206,772  | 0.017628 | 0.331 | 0.225 |  |  |  | <i>CUGBP2</i>   | Body    |
| cg26168907 | 6  | 32,977,223  | 3.23E-06 | 0.331 | 0.310 |  |  |  | <i>HLA-DOA</i>  | Body    |
| cg08949408 | 10 | 16,562,470  | 0.000619 | 0.331 | 0.231 |  |  |  | <i>C1QL3</i>    | Body    |
| cg10190863 | 5  | 139,077,047 | 0.000599 | 0.331 | 0.223 |  |  |  |                 |         |
| cg22413056 | 6  | 30,650,202  | 1.89E-09 | 0.331 | 0.355 |  |  |  | <i>KIAA1949</i> | Body    |
| cg25278941 | 6  | 139,795,527 | 1.05E-21 | 0.331 | 0.320 |  |  |  |                 |         |
| cg04812556 | 11 | 9,112,715   | 0.000644 | 0.331 | 0.165 |  |  |  | <i>SCUBE2</i>   | Body    |
| cg18038544 | 3  | 14,576,099  | 9.89E-14 | 0.331 | 0.325 |  |  |  | <i>GRIP2</i>    | Body    |
| cg00995986 | 2  | 66,665,428  | 6.78E-05 | 0.331 | 0.380 |  |  |  | <i>MEIS1</i>    | Body    |
| cg01691182 | 7  | 55,639,118  | 8.36E-12 | 0.331 | 0.263 |  |  |  | <i>VOPP1</i>    | Body    |
| cg19225602 | 11 | 75,269,316  | 5.92E-20 | 0.331 | 0.327 |  |  |  |                 |         |
| cg08043592 | 19 | 56,687,388  | 1.74E-07 | 0.331 | 0.369 |  |  |  | <i>GALP</i>     | 1stExon |
| cg23097402 | 1  | 50,883,394  | 9.19E-06 | 0.331 | 0.360 |  |  |  | <i>DMRTA2</i>   | 3'UTR   |
| cg26294995 | 5  | 36,067,091  | 4.78E-07 | 0.331 | 0.318 |  |  |  | <i>UGT3A2</i>   | TSS200  |
| cg08943714 | 6  | 139,470,282 | 1.58E-33 | 0.331 | 0.324 |  |  |  | <i>HECA</i>     | Body    |
| cg01646639 | 14 | 70,654,290  | 1.58E-06 | 0.330 | 0.274 |  |  |  | <i>SLC8A3</i>   | 5'UTR   |
| cg04621020 | 5  | 101,632,341 | 0.000645 | 0.330 | 0.284 |  |  |  | <i>SLCO4C1</i>  | TSS200  |
| cg09793121 | 21 | 34,398,263  | 2.88E-07 | 0.330 | 0.336 |  |  |  | <i>OLIG2</i>    | 1stExon |
| cg21620778 | 2  | 175,548,020 | 0.022108 | 0.330 | 0.220 |  |  |  | <i>WIPF1</i>    | TSS1500 |
| cg03281981 | 12 | 115,123,757 | 6.46E-12 | 0.330 | 0.277 |  |  |  |                 |         |



|            |    |             |          |       |       |          |       |     |                 |         |
|------------|----|-------------|----------|-------|-------|----------|-------|-----|-----------------|---------|
| cg25433595 | X  | 100,183,764 | 1.48E-05 | 0.330 | 0.162 |          |       |     | <i>XKRX</i>     | 5'UTR   |
| cg26018901 | 4  | 47,840,011  | 3.68E-07 | 0.330 | 0.287 | 1.72E-10 | 0.144 |     | <i>CORIN</i>    | 5'UTR   |
| cg00795341 | 5  | 79,330,929  | 0.002948 | 0.330 | 0.270 |          |       |     | <i>THBS4</i>    | TSS200  |
| cg15836505 | 19 | 20,349,252  | 0.020153 | 0.330 | 0.170 |          |       |     |                 |         |
| cg05317090 | 16 | 54,969,706  | 4.81E-05 | 0.330 | 0.409 |          |       |     |                 |         |
| cg20810222 | 2  | 109,947,649 | 8.97E-12 | 0.330 | 0.286 |          |       |     | <i>SH3RF3</i>   | Body    |
| cg05590619 | 3  | 42,056,814  | 9.59E-13 | 0.330 | 0.262 |          |       |     |                 |         |
| cg14262740 | 14 | 20,612,220  | 1.16E-17 | 0.330 | 0.296 |          |       |     | <i>OR4N5</i>    | 1stExon |
| cg20647610 | 2  | 228,736,258 | 0.005518 | 0.330 | 0.428 |          |       |     | <i>WDR69</i>    | TSS200  |
| cg00842687 | 3  | 73,816,009  | 3.64E-23 | 0.330 | 0.335 |          |       |     |                 |         |
| cg15020645 | 5  | 112,073,769 | 0.000775 | 0.330 | 0.196 | 5.44E-20 | 0.237 |     | <i>APC</i>      | 5'UTR   |
| cg10968631 | 14 | 69,986,021  | 1.1E-23  | 0.330 | 0.320 |          |       | Yes | <i>FLJ44817</i> | Body    |
| cg13617795 | 7  | 105,137,683 | 6.69E-17 | 0.330 | 0.332 |          |       |     | <i>PUS7</i>     | Body    |
| cg14530275 | 9  | 16,705,212  | 2.26E-19 | 0.330 | 0.314 |          |       |     | <i>BNC2</i>     | Body    |
| cg08726522 | 11 | 8,739,587   | 1.79E-06 | 0.330 | 0.373 |          |       |     | <i>ST5</i>      | Body    |
| cg25942990 | 2  | 177,014,996 | 7.71E-07 | 0.330 | 0.278 |          |       |     | <i>HOXD4</i>    | TSS1500 |
| cg03040165 | 2  | 131,185,700 | 0.00337  | 0.330 | 0.318 |          |       |     |                 |         |
| cg17210933 | 5  | 3,428,696   | 2.73E-06 | 0.330 | 0.332 |          |       |     |                 |         |
| cg24542714 | 1  | 46,669,345  | 2.76E-10 | 0.330 | 0.350 |          |       |     | <i>POMGNT1</i>  | Body    |
| cg19841506 | 17 | 4,642,056   | 1.53E-08 | 0.330 | 0.191 | 4.7E-17  | 0.197 |     | <i>ZMYND15</i>  | TSS1500 |
| cg01047555 | 6  | 127,835,990 | 1.25E-18 | 0.330 | 0.328 |          |       |     | <i>C6orf174</i> | Body    |
| cg12606911 | 2  | 87,036,626  | 3.72E-06 | 0.330 | 0.335 |          |       |     | <i>CD8A</i>     | TSS1500 |
| cg19092981 | 22 | 19,751,654  | 4.39E-16 | 0.330 | 0.304 |          |       |     | <i>TBX1</i>     | Body    |
| cg08275602 | 12 | 29,935,873  | 0.001042 | 0.330 | 0.206 |          |       |     | <i>TMTC1</i>    | 5'UTR   |
| cg07779387 | 2  | 95,873,465  | 0.000807 | 0.330 | 0.228 |          |       |     |                 |         |
| cg16515523 | 1  | 171,811,529 | 0.000143 | 0.330 | 0.203 |          |       |     | <i>DNM3</i>     | Body    |
| cg24859937 | 8  | 38,411,708  | 0.016887 | 0.330 | 0.259 |          |       |     |                 |         |
| cg10784386 | 5  | 79,330,943  | 8.91E-05 | 0.330 | 0.261 |          |       |     | <i>THBS4</i>    | TSS200  |
| cg07367232 | 17 | 7,826,266   | 0.007575 | 0.330 | 0.321 |          |       |     | <i>KCNAB3</i>   | 3'UTR   |
| cg10788618 | 17 | 46,622,022  | 0.000369 | 0.330 | 0.313 |          |       |     | <i>HOXB2</i>    | 1stExon |
| cg11573219 | 1  | 32,083,031  | 8.4E-37  | 0.330 | 0.317 |          |       |     | <i>HCRTR1</i>   | TSS1500 |
| cg00523604 | 6  | 32,223,341  | 7.49E-09 | 0.330 | 0.330 |          |       |     |                 |         |
| cg17074762 | X  | 68,052,208  | 6.75E-27 | 0.330 | 0.315 |          |       |     | <i>EFNB1</i>    | Body    |
| cg20177650 | 3  | 181,445,156 | 0.001545 | 0.330 | 0.336 |          |       |     | <i>SOX2OT</i>   | Body    |

|            |    |             |          |       |       |          |       |  |                 |         |
|------------|----|-------------|----------|-------|-------|----------|-------|--|-----------------|---------|
| cg07121856 | 7  | 95,025,736  | 2.42E-09 | 0.330 | 0.285 |          |       |  | <i>PON3</i>     | TSS200  |
| cg00814733 | 12 | 4,382,051   | 7.86E-12 | 0.330 | 0.296 |          |       |  | <i>CCND2</i>    | TSS1500 |
| cg00809111 | X  | 130,192,134 | 1.55E-05 | 0.329 | 0.214 |          |       |  | <i>FLJ30058</i> | TSS200  |
| cg11205552 | 3  | 112,995,690 | 1.1E-09  | 0.329 | 0.277 |          |       |  | <i>BOC</i>      | Body    |
| cg03744043 | 18 | 45,662,275  | 2.29E-10 | 0.329 | 0.308 |          |       |  |                 |         |
| cg03429644 | 2  | 9,252,446   | 1.98E-07 | 0.329 | 0.346 |          |       |  |                 |         |
| cg08832906 | 7  | 139,208,852 | 0.000144 | 0.329 | 0.313 |          |       |  | <i>CLEC2L</i>   | 1stExon |
| cg16375290 | 5  | 177,412,718 | 2.71E-07 | 0.329 | 0.345 |          |       |  |                 |         |
| cg20646556 | 7  | 1,022,806   | 2.57E-26 | 0.329 | 0.318 |          |       |  | <i>CYP2W1</i>   | TSS200  |
| cg02927346 | 17 | 34,059,260  | 4.37E-12 | 0.329 | 0.322 | 1.05E-22 | 0.243 |  | <i>RASL10B</i>  | 5'UTR   |
| cg09072216 | 13 | 36,919,344  | 0.000266 | 0.329 | 0.427 |          |       |  | <i>SPG20</i>    | 5'UTR   |
| cg05031016 | 14 | 24,804,153  | 1.5E-05  | 0.329 | 0.347 |          |       |  | <i>ADCY4</i>    | TSS1500 |
| cg03195164 | 3  | 128,998,642 | 0.020048 | 0.329 | 0.085 |          |       |  | <i>C3orf37</i>  | Body    |
| cg14141458 | 2  | 46,770,817  | 1.01E-06 | 0.329 | 0.234 |          |       |  | <i>RHOQ</i>     | Body    |
| cg06638529 | 1  | 44,704,073  | 6.24E-29 | 0.329 | 0.307 |          |       |  | <i>ERIB</i>     | Body    |
| cg22592142 | 15 | 45,409,170  | 4.29E-11 | 0.329 | 0.319 |          |       |  | <i>DUOXA2</i>   | Body    |
| cg27379109 | 5  | 74,907,287  | 3.04E-15 | 0.329 | 0.286 |          |       |  |                 |         |
| cg00201468 | 9  | 88,137,984  | 0.004344 | 0.329 | 0.277 |          |       |  |                 |         |
| cg09774842 | 20 | 3,052,483   | 1.09E-11 | 0.329 | 0.348 |          |       |  | <i>OXT</i>      | Body    |
| cg00866556 | 1  | 29,449,356  | 2.96E-05 | 0.329 | 0.364 |          |       |  | <i>TMEM200B</i> | 5'UTR   |
| cg04837025 | 1  | 236,228,744 | 0.016035 | 0.329 | 0.134 |          |       |  | <i>NID1</i>     | TSS1500 |
| cg18652367 | 5  | 180,017,689 | 0.00038  | 0.329 | 0.292 |          |       |  | <i>SCGB3A1</i>  | Body    |
| cg23552977 | 14 | 21,492,433  | 1.27E-07 | 0.329 | 0.366 |          |       |  | <i>NDRG2</i>    | 5'UTR   |
| cg22287064 | 17 | 73,584,070  | 0.000216 | 0.329 | 0.285 |          |       |  | <i>MYO15B</i>   | TSS200  |
| cg12812583 | 8  | 23,567,310  | 0.000151 | 0.329 | 0.294 |          |       |  |                 |         |
| cg09505788 | 7  | 117,854,511 | 0.000122 | 0.329 | 0.292 |          |       |  |                 |         |
| cg03529003 | 1  | 11,994,281  | 1.47E-06 | 0.329 | 0.284 |          |       |  | <i>PLOD1</i>    | TSS1500 |
| cg22692511 | 11 | 117,069,966 | 1.15E-11 | 0.329 | 0.321 |          |       |  | <i>TAGLN</i>    | TSS200  |
| cg24377179 | 3  | 55,523,815  | 0.001602 | 0.329 | 0.219 |          |       |  |                 |         |
| cg24451123 | 17 | 6,559,656   | 0.009528 | 0.329 | 0.315 |          |       |  |                 |         |
| cg17627629 | 5  | 179,517,140 | 0.000783 | 0.329 | 0.214 |          |       |  |                 |         |
| cg27481555 | 7  | 102,553,369 | 5.96E-10 | 0.329 | 0.316 |          |       |  | <i>LRRC17</i>   | 5'UTR   |
| cg02582940 | 2  | 97,308,417  | 1.08E-09 | 0.329 | 0.326 |          |       |  | <i>FER1L5</i>   | TSS200  |
| cg07152605 | 1  | 164,793,520 | 2.6E-27  | 0.329 | 0.320 |          |       |  | <i>PBX1</i>     | Body    |

|            |    |             |          |       |       |          |       |  |                 |         |
|------------|----|-------------|----------|-------|-------|----------|-------|--|-----------------|---------|
| cg12702981 | 3  | 119,528,656 | 2.05E-07 | 0.329 | 0.322 |          |       |  | <i>NR1I2</i>    | Body    |
| cg27494647 | 7  | 150,038,898 | 2.83E-07 | 0.329 | 0.335 |          |       |  | <i>RARRES2</i>  | TSS200  |
| cg17194270 | 22 | 39,759,992  | 1.11E-17 | 0.329 | 0.323 |          |       |  | <i>SYNGR1</i>   | Body    |
| cg05603881 | 4  | 42,401,149  | 0.000212 | 0.329 | 0.320 |          |       |  | <i>SHISA3</i>   | Body    |
| cg22289434 | 20 | 34,188,940  | 5.44E-12 | 0.329 | 0.359 |          |       |  | <i>FER1L4</i>   | Body    |
| cg24122124 | 19 | 5,339,092   | 4.21E-06 | 0.329 | 0.346 |          |       |  | <i>PTPRS</i>    | 5'UTR   |
| cg00925616 | 1  | 32,410,211  | 7.1E-08  | 0.329 | 0.326 |          |       |  |                 |         |
| cg18320766 | 19 | 55,598,782  | 0.000111 | 0.329 | 0.273 |          |       |  | <i>EPS8L1</i>   | Body    |
| cg01532168 | 8  | 140,715,557 | 8.17E-06 | 0.329 | 0.367 |          |       |  | <i>KCNK9</i>    | TSS1500 |
| cg15124757 | 2  | 17,699,904  | 0.007071 | 0.329 | 0.379 |          |       |  | <i>RAD51AP2</i> | TSS200  |
| cg17120578 | 8  | 38,329,836  | 3.28E-14 | 0.329 | 0.278 |          |       |  |                 |         |
| cg18427091 | 17 | 30,115,417  | 4.23E-18 | 0.329 | 0.321 |          |       |  |                 |         |
| cg05907835 | 16 | 31,214,346  | 1.86E-15 | 0.329 | 0.269 |          |       |  | <i>PYCARD</i>   | TSS200  |
| cg09165441 | 10 | 103,044,194 | 4.69E-05 | 0.329 | 0.282 |          |       |  |                 |         |
| cg04226536 | 11 | 111,411,071 | 3.73E-19 | 0.329 | 0.296 |          |       |  | <i>LAYN</i>     | TSS200  |
| cg10720723 | 7  | 157,476,443 | 3.76E-14 | 0.329 | 0.312 |          |       |  | <i>PTPRN2</i>   | Body    |
| cg20512711 | 11 | 31,841,524  | 8.79E-05 | 0.329 | 0.370 |          |       |  |                 |         |
| cg18862767 | 1  | 40,137,970  | 3.34E-08 | 0.329 | 0.293 |          |       |  | <i>NT5C1A</i>   | TSS1500 |
| cg06222062 | 1  | 20,396,690  | 7.02E-13 | 0.328 | 0.306 |          |       |  | <i>PLA2G5</i>   | TSS200  |
| cg18959207 | 10 | 18,549,686  | 9.66E-20 | 0.328 | 0.323 |          |       |  | <i>CACNB2</i>   | 1stExon |
| cg19349217 | 6  | 29,894,903  | 0.007195 | 0.328 | 0.296 |          |       |  | <i>HCG4P6</i>   | TSS1500 |
| cg14870792 | 12 | 2,163,532   | 0.000209 | 0.328 | 0.237 |          |       |  | <i>CACNA1C</i>  | Body    |
| cg07066369 | 12 | 4,384,888   | 0.000254 | 0.328 | 0.362 |          |       |  | <i>CCND2</i>    | Body    |
| cg04752680 | 19 | 14,114,100  | 7.16E-25 | 0.328 | 0.305 |          |       |  | <i>RFX1</i>     | 5'UTR   |
| cg13347910 | 6  | 10,555,853  | 6.53E-08 | 0.328 | 0.307 |          |       |  | <i>GCNT2</i>    | TSS200  |
| cg24254196 | 15 | 101,719,523 | 1.72E-12 | 0.328 | 0.264 |          |       |  | <i>CHSY1</i>    | Body    |
| cg12024969 | 19 | 6,768,022   | 0.000733 | 0.328 | 0.227 |          |       |  | <i>SH2D3A</i>   | TSS1500 |
| cg12472483 | 7  | 157,996,945 | 4.02E-43 | 0.328 | 0.314 |          |       |  | <i>PTPRN2</i>   | Body    |
| cg22970435 | 6  | 44,310,228  | 6.19E-16 | 0.328 | 0.322 | 7.77E-25 | 0.226 |  | <i>SPATS1</i>   | TSS200  |
| cg01678084 | 15 | 67,022,087  | 7.07E-25 | 0.328 | 0.323 |          |       |  | <i>SMAD6</i>    | Body    |
| cg18628371 | 14 | 24,641,189  | 7.1E-12  | 0.328 | 0.324 |          |       |  | <i>REC8</i>     | TSS200  |
| cg02466815 | 2  | 177,054,573 | 4.19E-08 | 0.328 | 0.310 |          |       |  | <i>HOXD1</i>    | Body    |
| cg10071643 | 6  | 137,814,356 | 6.44E-10 | 0.328 | 0.328 |          |       |  | <i>OLIG3</i>    | 1stExon |
| cg12602409 | 2  | 177,039,568 | 0.009908 | 0.328 | 0.357 |          |       |  |                 |         |

|            |    |             |          |       |       |          |       |  |                 |         |
|------------|----|-------------|----------|-------|-------|----------|-------|--|-----------------|---------|
| cg24832985 | 5  | 81,148,310  | 1.58E-11 | 0.328 | 0.290 |          |       |  |                 |         |
| cg23092823 | 1  | 53,528,612  | 6.23E-15 | 0.328 | 0.306 | 7.23E-23 | 0.263 |  | <i>PODN</i>     | Body    |
| cg20276377 | 3  | 99,595,026  | 0.002347 | 0.328 | 0.370 |          |       |  | <i>C3orf26</i>  | Body    |
| cg08692423 | 21 | 45,148,864  | 0.000752 | 0.328 | 0.203 |          |       |  | <i>PDXK</i>     | Body    |
| cg07529534 | 8  | 41,511,314  | 0.040363 | 0.328 | 0.327 |          |       |  | <i>ANK1</i>     | 3'UTR   |
| cg10981580 | 1  | 236,306,767 | 0.008032 | 0.328 | 0.175 |          |       |  | <i>GPR137B</i>  | Body    |
| cg20254354 | 12 | 99,287,558  | 0.00043  | 0.328 | 0.240 |          |       |  | <i>ANKS1B</i>   | Body    |
| cg06581175 | 7  | 96,632,635  | 0.000155 | 0.328 | 0.309 |          |       |  | <i>DLX6AS</i>   | Body    |
| cg08725455 | X  | 53,077,301  | 1.46E-10 | 0.328 | 0.303 |          |       |  | <i>GPR173</i>   | TSS1500 |
| cg21316772 | 9  | 33,167,933  | 1.35E-22 | 0.328 | 0.309 |          |       |  | <i>B4GALT1</i>  | TSS1500 |
| cg13908315 | 15 | 29,033,896  | 1E-12    | 0.328 | 0.326 |          |       |  |                 |         |
| cg22892110 | 8  | 144,798,631 | 4.48E-15 | 0.328 | 0.342 | 1.29E-29 | 0.325 |  | <i>MAPK15</i>   | Body    |
| cg13654836 | 17 | 55,365,912  | 3.87E-23 | 0.328 | 0.300 |          |       |  | <i>MSI2</i>     | Body    |
| cg21853510 | 17 | 80,285,525  | 1.96E-09 | 0.328 | 0.368 |          |       |  | <i>SECTM1</i>   | 5'UTR   |
| cg07573727 | 14 | 74,706,196  | 8.13E-06 | 0.328 | 0.305 |          |       |  | <i>VSX2</i>     | 5'UTR   |
| cg12268565 | X  | 133,685,325 | 1.44E-08 | 0.328 | 0.319 |          |       |  |                 |         |
| cg15885440 | 12 | 29,302,714  | 0.000273 | 0.328 | 0.208 |          |       |  |                 |         |
| cg21428710 | 12 | 47,219,797  | 6.45E-13 | 0.328 | 0.286 |          |       |  | <i>SLC38A4</i>  | TSS200  |
| cg05258757 | 3  | 125,690,986 | 4.6E-05  | 0.328 | 0.272 |          |       |  | <i>ROPN1B</i>   | Body    |
| cg14824386 | 8  | 41,167,923  | 0.014576 | 0.328 | 0.223 |          |       |  | <i>SFRP1</i>    | TSS1500 |
| cg03452174 | 17 | 27,045,113  | 4.54E-10 | 0.328 | 0.370 |          |       |  | <i>RAB34</i>    | Body    |
| cg14706852 | 2  | 127,976,351 | 3.69E-10 | 0.328 | 0.311 |          |       |  |                 |         |
| cg03731268 | 1  | 62,660,861  | 1.3E-05  | 0.328 | 0.370 |          |       |  | <i>L1TD1</i>    | 5'UTR   |
| cg00365499 | 7  | 104,909,430 | 0.000149 | 0.328 | 0.302 |          |       |  | <i>SRPK2</i>    | 5'UTR   |
| cg07223180 | 13 | 20,989,142  | 7.16E-17 | 0.328 | 0.307 |          |       |  | <i>CRYL1</i>    | Body    |
| cg18139020 | 1  | 33,938,191  | 0.027092 | 0.328 | 0.320 |          |       |  | <i>ZSCAN20</i>  | TSS200  |
| cg23161999 | 2  | 162,283,189 | 0.021722 | 0.328 | 0.304 |          |       |  |                 |         |
| cg14088921 | 8  | 98,944,936  | 1.43E-05 | 0.328 | 0.311 |          |       |  | <i>MATN2</i>    | Body    |
| cg12074780 | 12 | 53,719,569  | 0.000296 | 0.328 | 0.384 |          |       |  |                 |         |
| cg05183931 | 11 | 17,717,588  | 0.010927 | 0.328 | 0.347 |          |       |  |                 |         |
| cg21963854 | 15 | 69,366,348  | 0.000238 | 0.328 | 0.160 |          |       |  | <i>MIR548H4</i> | Body    |
| cg01121022 | 14 | 104,338,788 | 3.93E-16 | 0.328 | 0.303 |          |       |  |                 |         |
| cg12518442 | 20 | 55,841,906  | 0.039162 | 0.328 | 0.197 |          |       |  | <i>BMP7</i>     | TSS200  |
| cg10511249 | 1  | 43,533,955  | 0.007658 | 0.328 | 0.109 |          |       |  |                 |         |

|            |    |             |          |       |       |          |       |     |                  |         |
|------------|----|-------------|----------|-------|-------|----------|-------|-----|------------------|---------|
| cg19028462 | 13 | 113,677,628 | 7.21E-21 | 0.328 | 0.310 |          |       |     | <i>MCF2L</i>     | Body    |
| cg06899970 | 8  | 42,234,669  | 5.03E-10 | 0.327 | 0.308 |          |       | Yes | <i>DKK4</i>      | 5'UTR   |
| cg21001198 | 20 | 6,033,205   | 0.011793 | 0.327 | 0.110 |          |       |     | <i>LRRN4</i>     | Body    |
| cg19350360 | 15 | 100,913,948 | 0.000399 | 0.327 | 0.290 |          |       |     |                  |         |
| cg03423123 | X  | 134,125,181 | 1.35E-05 | 0.327 | 0.334 |          |       |     | <i>LOC644538</i> | 1stExon |
| cg02595575 | 19 | 19,221,316  | 3.12E-05 | 0.327 | 0.336 |          |       |     | <i>SLC25A42</i>  | Body    |
| cg13793145 | 6  | 44,187,109  | 0.008289 | 0.327 | 0.235 |          |       |     | <i>SLC29A1</i>   | TSS200  |
| cg10651121 | 12 | 109,549,097 | 3E-08    | 0.327 | 0.221 |          |       |     |                  |         |
| cg08266366 | 12 | 50,354,998  | 3.46E-13 | 0.327 | 0.288 |          |       |     | <i>AQP5</i>      | TSS1500 |
| cg05539515 | 1  | 62,784,269  | 2.12E-10 | 0.327 | 0.332 |          |       |     | <i>KANK4</i>     | 5'UTR   |
| cg27267227 | 16 | 29,888,023  | 8.61E-07 | 0.327 | 0.331 |          |       |     | <i>SEZ6L2</i>    | Body    |
| cg22735222 | 10 | 101,295,724 | 0.004895 | 0.327 | 0.304 |          |       |     | <i>NKX2-3</i>    | 3'UTR   |
| cg16430510 | 11 | 35,639,686  | 0.006818 | 0.327 | 0.243 |          |       |     | <i>FJX1</i>      | TSS200  |
| cg06811478 | 8  | 10,872,626  | 1.47E-05 | 0.327 | 0.318 |          |       |     | <i>XKR6</i>      | Body    |
| cg04365224 | 3  | 72,788,183  | 1.77E-08 | 0.327 | 0.268 |          |       |     |                  |         |
| cg07696516 | 4  | 41,614,958  | 4.15E-10 | 0.327 | 0.247 |          |       | Yes | <i>LIMCH1</i>    | 1stExon |
| cg08950287 | 7  | 99,725,807  | 2.16E-12 | 0.327 | 0.261 |          |       |     | <i>MBLAC1</i>    | Body    |
| cg24096855 | 19 | 38,700,334  | 4.7E-12  | 0.327 | 0.360 |          |       |     |                  |         |
| cg08310866 | 17 | 21,281,163  | 2.28E-12 | 0.327 | 0.351 |          |       |     | <i>KCNJ12</i>    | 5'UTR   |
| cg00112042 | 1  | 146,555,865 | 1.47E-06 | 0.327 | 0.321 |          |       |     |                  |         |
| cg11241541 | 8  | 38,586,066  | 5.6E-05  | 0.327 | 0.284 |          |       |     | <i>TACC1</i>     | 1stExon |
| cg13073773 | 14 | 95,234,658  | 1.5E-05  | 0.327 | 0.370 |          |       |     | <i>GSC</i>       | 3'UTR   |
| cg18894200 | 7  | 157,484,250 | 5.24E-28 | 0.327 | 0.312 |          |       |     | <i>PTPRN2</i>    | Body    |
| cg24827726 | 3  | 14,581,937  | 8.43E-12 | 0.327 | 0.361 |          |       |     | <i>GRIP2</i>     | Body    |
| cg18285788 | 7  | 157,475,692 | 6.47E-10 | 0.327 | 0.313 |          |       |     | <i>PTPRN2</i>    | Body    |
| cg18877506 | 1  | 13,910,555  | 5.55E-07 | 0.327 | 0.375 | 1.24E-18 | 0.182 |     | <i>PDPN</i>      | TSS1500 |
| cg25338134 | 3  | 72,940,510  | 5.64E-21 | 0.327 | 0.316 |          |       |     | <i>GXYLT2</i>    | Body    |
| cg19305681 | 10 | 94,821,657  | 4.93E-10 | 0.327 | 0.272 |          |       |     | <i>CYP26C1</i>   | Body    |
| cg24470119 | 19 | 8,432,416   | 0.004598 | 0.327 | 0.314 |          |       |     | <i>ANGPTL4</i>   | Body    |
| cg01401641 | 19 | 31,839,171  | 2.04E-19 | 0.327 | 0.321 |          |       |     | <i>TSHZ3</i>     | Body    |
| cg14405137 | 12 | 50,219,283  | 1.59E-18 | 0.327 | 0.325 |          |       |     | <i>NCKAP5L</i>   | 5'UTR   |
| cg19591881 | 1  | 208,084,640 | 2.55E-09 | 0.327 | 0.306 | 4.97E-21 | 0.243 |     | <i>CD34</i>      | 5'UTR   |
| cg01964152 | 6  | 30,095,546  | 5.08E-06 | 0.327 | 0.328 |          |       |     |                  |         |
| cg24351410 | 1  | 58,716,033  | 1.25E-06 | 0.327 | 0.278 |          |       |     | <i>DAB1</i>      | 5'UTR   |

|            |    |             |          |       |       |          |       |  |                 |         |
|------------|----|-------------|----------|-------|-------|----------|-------|--|-----------------|---------|
| cg13699887 | 6  | 16,320,488  | 0.005439 | 0.327 | 0.396 |          |       |  | <i>ATXN1</i>    | Body    |
| cg01596834 | 3  | 183,993,711 | 1.09E-06 | 0.327 | 0.229 |          |       |  | <i>ECE2</i>     | TSS200  |
| cg02874942 | 19 | 11,689,649  | 1.7E-05  | 0.327 | 0.320 |          |       |  | <i>ACP5</i>     | TSS1500 |
| cg14225678 | 7  | 54,612,325  | 0.007114 | 0.327 | 0.346 |          |       |  | <i>VSTM2A</i>   | Body    |
| cg07968031 | 3  | 129,346,101 | 0.000375 | 0.327 | 0.341 |          |       |  |                 |         |
| cg20945738 | 13 | 108,922,032 | 1.57E-06 | 0.327 | 0.289 |          |       |  | <i>TNFSF13B</i> | 5'UTR   |
| cg17820365 | 8  | 97,157,856  | 1.65E-05 | 0.327 | 0.327 |          |       |  | <i>GDF6</i>     | Body    |
| cg14753355 | 19 | 16,999,668  | 0.000376 | 0.327 | 0.283 |          |       |  | <i>F2RL3</i>    | TSS200  |
| cg17163760 | 7  | 29,186,267  | 0.000704 | 0.327 | 0.282 |          |       |  | <i>CPVL</i>     | TSS200  |
| cg05243438 | 1  | 113,265,611 | 4.25E-23 | 0.327 | 0.316 |          |       |  | <i>FAM19A3</i>  | Body    |
| cg27507295 | 15 | 90,039,794  | 5.27E-10 | 0.327 | 0.325 |          |       |  | <i>RHCG</i>     | 1stExon |
| cg08148891 | 11 | 13,030,309  | 2E-08    | 0.327 | 0.270 |          |       |  | <i>RASSF10</i>  | TSS1500 |
| cg06126421 | 6  | 30,720,080  | 1.95E-15 | 0.327 | 0.263 |          |       |  |                 |         |
| cg06557644 | 7  | 30,510,463  | 1.18E-06 | 0.326 | 0.259 |          |       |  | <i>NOD1</i>     | 5'UTR   |
| cg16264526 | 4  | 148,401,273 | 7.1E-15  | 0.326 | 0.330 |          |       |  | <i>EDNRA</i>    | TSS1500 |
| cg22837714 | 2  | 198,120,525 | 1.73E-09 | 0.326 | 0.318 |          |       |  |                 |         |
| cg11859584 | 19 | 3,361,374   | 7.46E-07 | 0.326 | 0.283 |          |       |  | <i>NFIC</i>     | Body    |
| cg00301239 | 8  | 103,801,487 | 2.04E-13 | 0.326 | 0.323 |          |       |  |                 |         |
| cg08690876 | 22 | 43,040,721  | 9.02E-13 | 0.326 | 0.327 |          |       |  | <i>CYB5R3</i>   | 5'UTR   |
| cg08815081 | 10 | 28,035,731  | 6.73E-14 | 0.326 | 0.337 |          |       |  | <i>MKX</i>      | TSS1500 |
| cg18862481 | 3  | 129,693,370 | 8.56E-08 | 0.326 | 0.326 |          |       |  | <i>TRH</i>      | 5'UTR   |
| cg27146050 | 19 | 46,801,557  | 1.15E-12 | 0.326 | 0.355 |          |       |  | <i>HIF3A</i>    | Body    |
| cg26251270 | 1  | 53,067,832  | 8.88E-05 | 0.326 | 0.175 |          |       |  | <i>GPX7</i>     | TSS1500 |
| cg26282655 | 20 | 2,505,978   | 8.92E-06 | 0.326 | 0.260 |          |       |  |                 |         |
| cg21754400 | 12 | 81,471,649  | 2.14E-12 | 0.326 | 0.284 |          |       |  | <i>ACSS3</i>    | TSS200  |
| cg25025646 | 7  | 150,711,449 | 1.13E-16 | 0.326 | 0.331 |          |       |  | <i>NOS3</i>     | 3'UTR   |
| cg08260959 | 6  | 26,240,920  | 2.93E-05 | 0.326 | 0.314 | 1.38E-11 | 0.176 |  | <i>HIST1H4F</i> | 1stExon |
| cg21905630 | 4  | 54,965,904  | 1.15E-05 | 0.326 | 0.359 | 1.67E-15 | 0.206 |  | <i>GSX2</i>     | TSS1500 |
| cg07072475 | 14 | 90,850,234  | 6.49E-05 | 0.326 | 0.347 |          |       |  |                 |         |
| cg13180315 | 2  | 177,024,294 | 0.03004  | 0.326 | 0.381 |          |       |  |                 |         |
| cg14644001 | 6  | 32,116,653  | 0.020981 | 0.326 | 0.330 |          |       |  | <i>PRRT1</i>    | 3'UTR   |
| cg05816868 | 1  | 26,686,860  | 1.89E-06 | 0.326 | 0.370 |          |       |  |                 |         |
| cg08290850 | 6  | 44,238,228  | 0.000841 | 0.326 | 0.203 |          |       |  | <i>TMEM151B</i> | TSS1500 |
| cg12399536 | 11 | 12,884,884  | 3.87E-16 | 0.326 | 0.306 |          |       |  | <i>TEAD1</i>    | Body    |

|            |    |             |          |       |       |          |       |  |                     |         |
|------------|----|-------------|----------|-------|-------|----------|-------|--|---------------------|---------|
| cg05985303 | 2  | 219,723,705 | 1.27E-20 | 0.326 | 0.309 |          |       |  | <i>WNT6</i>         | TSS1500 |
| cg08390172 | 2  | 192,711,905 | 9.57E-05 | 0.326 | 0.369 |          |       |  | <i>SDPR</i>         | 5'UTR   |
| cg27586487 | 10 | 79,687,289  | 0.000116 | 0.326 | 0.243 |          |       |  | <i>LOC100128292</i> | Body    |
| cg06117341 | 16 | 3,062,653   | 6.34E-16 | 0.326 | 0.294 |          |       |  | <i>CLDN9</i>        | 1stExon |
| cg11337945 | 5  | 2,755,158   | 3.39E-07 | 0.326 | 0.354 |          |       |  | <i>C5orf38</i>      | 3'UTR   |
| cg18097189 | 3  | 154,147,955 | 2.26E-10 | 0.326 | 0.345 |          |       |  | <i>GPR149</i>       | TSS1500 |
| cg00347757 | 13 | 20,768,560  | 4.03E-08 | 0.326 | 0.319 |          |       |  | <i>GJB2</i>         | TSS1500 |
| cg06962177 | 1  | 63,785,946  | 0.014795 | 0.326 | 0.417 |          |       |  |                     |         |
| cg04069374 | X  | 119,445,076 | 0.000251 | 0.326 | 0.271 |          |       |  | <i>FAM70A</i>       | Body    |
| cg24779941 | 14 | 103,524,901 | 0.010472 | 0.326 | 0.418 |          |       |  | <i>CDC42BPB</i>     | TSS1500 |
| cg18809076 | 7  | 55,177,623  | 1.04E-18 | 0.326 | 0.302 |          |       |  | <i>EGFR</i>         | Body    |
| cg04920761 | 2  | 43,455,103  | 6.86E-08 | 0.326 | 0.255 |          |       |  | <i>ZFP36L2</i>      | TSS1500 |
| cg03686593 | 18 | 11,149,470  | 0.031495 | 0.326 | 0.299 |          |       |  | <i>FAM38B</i>       | TSS1500 |
| cg18546689 | 13 | 43,148,295  | 6.41E-06 | 0.326 | 0.306 |          |       |  | <i>TNFSF11</i>      | 1stExon |
| cg05376810 | 17 | 74,511,493  | 2.33E-15 | 0.326 | 0.297 |          |       |  |                     |         |
| cg08750440 | 2  | 43,447,375  | 0.005788 | 0.326 | 0.239 |          |       |  |                     |         |
| cg01627483 | 1  | 32,708,341  | 1.11E-06 | 0.326 | 0.284 |          |       |  | <i>MTMR9L</i>       | TSS1500 |
| cg21105787 | 10 | 73,847,257  | 1.79E-08 | 0.326 | 0.327 |          |       |  | <i>SPOCK2</i>       | Body    |
| cg17951713 | 8  | 130,698,161 | 3E-05    | 0.326 | 0.345 |          |       |  |                     |         |
| cg23523215 | 2  | 202,508,694 | 7.9E-11  | 0.326 | 0.281 |          |       |  | <i>ALS2CR4</i>      | TSS1500 |
| cg05813818 | 16 | 875,966     | 8.62E-05 | 0.326 | 0.256 |          |       |  |                     |         |
| cg27454883 | 10 | 102,626,432 | 0.007759 | 0.326 | 0.376 |          |       |  |                     |         |
| cg00126320 | 8  | 23,584,644  | 4.91E-05 | 0.326 | 0.226 |          |       |  |                     |         |
| cg18711066 | 16 | 68,118,822  | 1.09E-06 | 0.326 | 0.346 | 3.83E-41 | 0.242 |  | <i>NFATC3</i>       | TSS1500 |
| cg26985119 | X  | 49,022,801  | 1.07E-08 | 0.326 | 0.249 |          |       |  | <i>MAGIX</i>        | 3'UTR   |
| cg16103959 | 1  | 200,004,529 | 1.26E-06 | 0.326 | 0.357 |          |       |  | <i>NR5A2</i>        | Body    |
| cg26073885 | 12 | 31,506,955  | 6.28E-11 | 0.326 | 0.262 |          |       |  |                     |         |
| cg26295921 | 7  | 157,476,575 | 5.02E-10 | 0.326 | 0.329 |          |       |  | <i>PTPRN2</i>       | Body    |
| cg09493505 | 7  | 49,813,111  | 0.029131 | 0.326 | 0.467 |          |       |  | <i>VWC2</i>         | TSS200  |
| cg06858555 | 14 | 105,144,735 | 5.07E-15 | 0.326 | 0.283 |          |       |  |                     |         |
| cg00651829 | 22 | 23,413,066  | 0.016969 | 0.326 | 0.155 |          |       |  | <i>RTDR1</i>        | Body    |
| cg10026473 | 1  | 45,792,540  | 0.000261 | 0.326 | 0.327 |          |       |  | <i>HPDL</i>         | TSS200  |
| cg21489622 | 6  | 143,247,772 | 1.74E-06 | 0.326 | 0.235 |          |       |  | <i>HIVEP2</i>       | 5'UTR   |
| cg24715680 | 2  | 215,675,429 | 8.09E-20 | 0.326 | 0.265 |          |       |  | <i>BARD1</i>        | TSS1500 |

|            |    |             |          |       |       |          |       |     |  |                |         |
|------------|----|-------------|----------|-------|-------|----------|-------|-----|--|----------------|---------|
| cg11972677 | 11 | 30,605,704  | 3.84E-05 | 0.325 | 0.298 |          |       |     |  | <i>MPPED2</i>  | 5'UTR   |
| cg26266431 | 7  | 157,361,564 | 0.000265 | 0.325 | 0.311 |          |       | Yes |  | <i>PTPRN2</i>  | Body    |
| cg03905795 | 11 | 70,670,880  | 1.53E-07 | 0.325 | 0.261 |          |       |     |  | <i>SHANK2</i>  | Body    |
| cg04622802 | 11 | 27,015,872  | 2.96E-06 | 0.325 | 0.303 | 3.49E-33 | 0.307 |     |  | <i>FIBIN</i>   | 5'UTR   |
| cg00462951 | 12 | 5,539,736   | 4.91E-09 | 0.325 | 0.351 |          |       |     |  |                |         |
| cg08110785 | 17 | 55,952,217  | 2.16E-08 | 0.325 | 0.310 |          |       |     |  | <i>CUEDC1</i>  | Body    |
| cg08993878 | 12 | 98,151,379  | 2.68E-22 | 0.325 | 0.307 |          |       |     |  |                |         |
| cg01399219 | 7  | 44,145,110  | 1.4E-09  | 0.325 | 0.375 |          |       |     |  | <i>AEBP1</i>   | Body    |
| cg07529754 | 2  | 50,575,098  | 2.26E-05 | 0.325 | 0.244 |          |       |     |  | <i>NRXN1</i>   | Body    |
| cg20495819 | 2  | 30,448,529  | 9.29E-06 | 0.325 | 0.240 |          |       |     |  |                |         |
| cg08317263 | 5  | 150,603,169 | 1.99E-11 | 0.325 | 0.290 | 2.72E-18 | 0.176 |     |  | <i>CCDC69</i>  | Body    |
| cg06231618 | X  | 40,504,059  | 1.28E-09 | 0.325 | 0.285 |          |       |     |  | <i>CXorf38</i> | Body    |
| cg13231700 | 2  | 222,435,709 | 0.004215 | 0.325 | 0.188 |          |       |     |  | <i>EPHA4</i>   | Body    |
| cg19642402 | 15 | 77,287,762  | 1.96E-16 | 0.325 | 0.316 |          |       |     |  | <i>PSTPIP1</i> | 5'UTR   |
| cg06795971 | 4  | 106,067,365 | 0.000211 | 0.325 | 0.255 |          |       |     |  | <i>TET2</i>    | TSS1500 |
| cg08067566 | 4  | 13,529,282  | 0.004272 | 0.325 | 0.314 |          |       |     |  |                |         |
| cg26236177 | 14 | 61,110,649  | 3.03E-07 | 0.325 | 0.245 |          |       |     |  |                |         |
| cg15043615 | 17 | 74,025,708  | 1.77E-06 | 0.325 | 0.323 |          |       |     |  |                |         |
| cg20351171 | 22 | 37,720,723  | 4.87E-15 | 0.325 | 0.319 |          |       |     |  |                |         |
| cg02474799 | 19 | 19,072,780  | 0.004936 | 0.325 | 0.241 |          |       |     |  |                |         |
| cg02874376 | 14 | 101,193,397 | 0.004407 | 0.325 | 0.246 |          |       |     |  | <i>DLK1</i>    | 1stExon |
| cg16697214 | 7  | 50,343,361  | 4.92E-09 | 0.325 | 0.351 |          |       |     |  | <i>IKZF1</i>   | TSS1500 |
| cg05738152 | 2  | 287,354     | 4.35E-11 | 0.325 | 0.283 |          |       |     |  | <i>FAM150B</i> | Body    |
| cg26582768 | 10 | 102,792,043 | 0.008474 | 0.325 | 0.385 |          |       |     |  | <i>PDZD7</i>   | TSS1500 |
| cg01889143 | 5  | 134,825,791 | 1.03E-07 | 0.325 | 0.323 |          |       |     |  |                |         |
| cg12087004 | 3  | 195,906,436 | 3.63E-09 | 0.325 | 0.329 |          |       |     |  |                |         |
| cg21146184 | 22 | 46,262,436  | 5.06E-07 | 0.325 | 0.336 |          |       |     |  |                |         |
| cg05740243 | 10 | 135,160,775 | 8.22E-09 | 0.325 | 0.288 |          |       |     |  | <i>PRAP1</i>   | TSS200  |
| cg02236650 | 10 | 17,269,775  | 2.82E-06 | 0.325 | 0.321 |          |       |     |  | <i>VIM</i>     | TSS1500 |
| cg12355172 | 11 | 67,418,315  | 8.39E-11 | 0.325 | 0.317 |          |       |     |  | <i>ACY3</i>    | TSS200  |
| cg09938462 | 22 | 19,706,365  | 0.000267 | 0.325 | 0.319 |          |       |     |  | <i>SEPT5</i>   | Body    |
| cg22151644 | 12 | 54,444,047  | 7.87E-05 | 0.325 | 0.232 |          |       |     |  | <i>HOXC4</i>   | 5'UTR   |
| cg26390041 | 17 | 70,201,666  | 2.18E-07 | 0.325 | 0.317 |          |       |     |  |                |         |
| cg05010648 | 7  | 73,446,865  | 1.33E-14 | 0.325 | 0.338 |          |       |     |  | <i>ELN</i>     | Body    |



|            |    |             |          |       |       |         |       |  |                  |         |
|------------|----|-------------|----------|-------|-------|---------|-------|--|------------------|---------|
| cg08183724 | 20 | 21,497,429  | 0.021571 | 0.325 | 0.395 |         |       |  |                  |         |
| cg10762199 | 14 | 61,934,948  | 7.65E-15 | 0.325 | 0.315 |         |       |  | <i>PRKCH</i>     | Body    |
| cg17645677 | 5  | 149,185,704 | 3.43E-24 | 0.325 | 0.305 |         |       |  | <i>PPARGC1B</i>  | Body    |
| cg21150901 | 17 | 34,957,586  | 3.33E-06 | 0.325 | 0.210 |         |       |  | <i>MRM1</i>      | TSS1500 |
| cg19129842 | 3  | 128,565,090 | 5.52E-11 | 0.325 | 0.284 |         |       |  |                  |         |
| cg04074945 | 11 | 46,071,833  | 1.76E-20 | 0.325 | 0.324 |         |       |  | <i>PHF21A</i>    | Body    |
| cg24939845 | 1  | 110,627,473 | 4.2E-06  | 0.325 | 0.327 |         |       |  |                  |         |
| cg18330866 | 7  | 94,673,120  | 8.27E-14 | 0.325 | 0.326 |         |       |  | <i>PPP1R9A</i>   | Body    |
| cg23821329 | 10 | 17,269,643  | 6.57E-08 | 0.325 | 0.315 |         |       |  | <i>VIM</i>       | TSS1500 |
| cg10916429 | 15 | 64,799,784  | 9.41E-14 | 0.325 | 0.318 |         |       |  | <i>ZNF609</i>    | Body    |
| cg20178172 | 6  | 30,711,655  | 4.18E-23 | 0.325 | 0.321 |         |       |  | <i>IER3</i>      | 3'UTR   |
| cg05350879 | 4  | 88,451,223  | 3.21E-12 | 0.325 | 0.326 |         |       |  | <i>SPARCL1</i>   | TSS1500 |
| cg05549655 | 15 | 75,019,143  | 1.73E-14 | 0.325 | 0.308 |         |       |  | <i>CYP1A1</i>    | TSS1500 |
| cg24973993 | 12 | 120,242,513 | 5.08E-15 | 0.325 | 0.319 |         |       |  | <i>CIT</i>       | Body    |
| cg10130900 | 16 | 68,003,410  | 1.13E-07 | 0.325 | 0.224 |         |       |  | <i>SLC12A4</i>   | TSS1500 |
| cg21193484 | 14 | 61,938,892  | 5.25E-07 | 0.325 | 0.292 |         |       |  | <i>PRKCH</i>     | Body    |
| cg27072996 | 19 | 822,635     | 5.81E-05 | 0.325 | 0.334 |         |       |  | <i>LPPR3</i>     | TSS1500 |
| cg15181598 | 7  | 38,350,921  | 0.007131 | 0.325 | 0.049 |         |       |  |                  |         |
| cg06744119 | 10 | 88,730,599  | 0.005158 | 0.325 | 0.239 |         |       |  | <i>C10orf116</i> | 3'UTR   |
| cg07058988 | 17 | 80,297,159  | 0.000124 | 0.325 | 0.380 |         |       |  |                  |         |
| cg27234864 | 13 | 21,295,941  | 0.043475 | 0.325 | 0.179 |         |       |  | <i>IL17D</i>     | Body    |
| cg02351381 | 12 | 110,172,346 | 1.96E-13 | 0.325 | 0.329 | 1.1E-17 | 0.190 |  | <i>MGC14436</i>  | Body    |
| cg20438404 | 7  | 100,770,192 | 4.74E-09 | 0.325 | 0.326 |         |       |  | <i>SERPINE1</i>  | TSS200  |
| cg16620382 | 6  | 43,211,213  | 0.046642 | 0.325 | 0.335 |         |       |  | <i>TTBK1</i>     | TSS200  |
| cg00498305 | 10 | 119,000,236 | 2.51E-13 | 0.324 | 0.307 |         |       |  | <i>SLC18A2</i>   | TSS1500 |
| cg26227186 | 1  | 95,393,138  | 0.01455  | 0.324 | 0.121 |         |       |  | <i>CNN3</i>      | TSS1500 |
| cg20198242 | 6  | 29,855,110  | 6.45E-19 | 0.324 | 0.268 |         |       |  | <i>HLA-H</i>     | TSS1500 |
| cg26405020 | 15 | 91,427,363  | 3.29E-14 | 0.324 | 0.299 |         |       |  | <i>FES</i>       | TSS1500 |
| cg16800165 | 14 | 85,996,364  | 1.01E-09 | 0.324 | 0.336 |         |       |  | <i>FLRT2</i>     | TSS200  |
| cg17655415 | 10 | 89,802,559  | 1.18E-07 | 0.324 | 0.297 |         |       |  |                  |         |
| cg02259081 | 12 | 53,268,433  | 3.84E-18 | 0.324 | 0.286 |         |       |  |                  |         |
| cg07638650 | 10 | 43,697,849  | 2.01E-06 | 0.324 | 0.334 |         |       |  | <i>RASGEF1A</i>  | Body    |
| cg04574090 | 11 | 74,178,749  | 1.25E-06 | 0.324 | 0.270 |         |       |  | <i>KCNE3</i>     | TSS200  |
| cg08015801 | 6  | 26,088,040  | 0.001093 | 0.324 | 0.322 |         |       |  | <i>HFE</i>       | Body    |

|            |    |             |          |       |       |          |       |     |                  |         |
|------------|----|-------------|----------|-------|-------|----------|-------|-----|------------------|---------|
| cg15233183 | 19 | 16,187,102  | 0.00219  | 0.324 | 0.309 |          |       |     | <i>TPM4</i>      | Body    |
| cg07070728 | 3  | 141,399,954 | 1.31E-08 | 0.324 | 0.314 |          |       |     |                  |         |
| cg25888561 | 10 | 44,163,067  | 4.1E-05  | 0.324 | 0.274 |          |       |     |                  |         |
| cg07411620 | 2  | 176,948,759 | 0.045472 | 0.324 | 0.289 |          |       |     | <i>EVX2</i>      | TSS200  |
| cg25533774 | 7  | 16,505,409  | 0.000426 | 0.324 | 0.338 | 6.21E-15 | 0.159 |     | <i>SOSTDC1</i>   | 1stExon |
| cg27372920 | 5  | 52,778,745  | 7.77E-10 | 0.324 | 0.304 |          |       |     | <i>FST</i>       | Body    |
| cg27451672 | 7  | 99,156,362  | 0.007125 | 0.324 | 0.269 |          |       |     | <i>ZNF655</i>    | 1stExon |
| cg18130044 | 20 | 21,682,362  | 0.003777 | 0.324 | 0.353 |          |       |     |                  |         |
| cg13501793 | 14 | 55,031,733  | 1.11E-05 | 0.324 | 0.313 |          |       |     |                  |         |
| cg15575982 | 1  | 87,796,349  | 0.000493 | 0.324 | 0.311 |          |       |     | <i>LMO4</i>      | 5'UTR   |
| cg22614142 | 8  | 145,698,232 | 0.044108 | 0.324 | 0.381 |          |       |     | <i>KIFC2</i>     | Body    |
| cg21843616 | 4  | 85,424,469  | 0.001115 | 0.324 | 0.299 |          |       |     |                  |         |
| cg05334053 | 1  | 3,474,202   | 4.76E-05 | 0.324 | 0.287 |          |       |     | <i>MEGF6</i>     | Body    |
| cg09829319 | 6  | 10,882,238  | 5.96E-05 | 0.324 | 0.382 | 4.3E-12  | 0.211 |     | <i>GCM2</i>      | TSS200  |
| cg00063828 | 16 | 85,749,496  | 1.5E-12  | 0.324 | 0.304 |          |       |     | <i>C16orf74</i>  | Body    |
| cg17287767 | 2  | 192,015,279 | 0.0183   | 0.324 | 0.215 |          |       |     | <i>STAT4</i>     | 5'UTR   |
| cg00559249 | 5  | 131,831,244 | 3.51E-12 | 0.324 | 0.257 |          |       |     |                  |         |
| cg14283454 | 18 | 46,449,389  | 0.000244 | 0.324 | 0.276 |          |       |     | <i>SMAD7</i>     | Body    |
| cg24960799 | 6  | 24,908,812  | 6.07E-11 | 0.324 | 0.306 |          |       |     | <i>FAM65B</i>    | 5'UTR   |
| cg16017979 | 8  | 74,333,589  | 1.37E-27 | 0.324 | 0.313 |          |       |     | <i>STAU2</i>     | 3'UTR   |
| cg21328779 | 3  | 111,629,875 | 6.88E-12 | 0.324 | 0.312 |          |       |     | <i>PHLDB2</i>    | Body    |
| cg18723937 | 7  | 37,955,713  | 2.74E-05 | 0.324 | 0.338 |          |       |     | <i>SFRP4</i>     | 1stExon |
| cg09858188 | 7  | 156,814,480 | 0.000274 | 0.324 | 0.312 |          |       |     |                  |         |
| cg14537533 | 12 | 52,626,904  | 0.000275 | 0.324 | 0.353 |          |       |     | <i>KRT7</i>      | TSS200  |
| cg26219092 | 8  | 134,388,022 | 3.02E-11 | 0.324 | 0.285 |          |       |     |                  |         |
| cg00466116 | 1  | 59,221,344  | 0.002952 | 0.324 | 0.384 |          |       | Yes |                  |         |
| cg10308253 | 6  | 149,803,111 | 2.18E-09 | 0.324 | 0.350 |          |       |     | <i>ZC3H12D</i>   | 5'UTR   |
| cg12963656 | 3  | 101,659,687 | 1.16E-13 | 0.324 | 0.297 |          |       |     | <i>LOC152225</i> | TSS200  |
| cg09226986 | 6  | 160,852,328 | 5.92E-13 | 0.324 | 0.295 |          |       |     | <i>SLC22A3</i>   | Body    |
| cg16682899 | 16 | 85,508,110  | 5.11E-35 | 0.324 | 0.300 |          |       |     |                  |         |
| cg10191725 | X  | 25,034,625  | 3.13E-07 | 0.324 | 0.315 |          |       |     | <i>ARX</i>       | TSS1500 |
| cg00887153 | 16 | 71,559,593  | 3.47E-13 | 0.324 | 0.281 |          |       |     | <i>CHST4</i>     | TSS1500 |
| cg14270346 | 9  | 38,026,076  | 2.78E-15 | 0.324 | 0.324 |          |       |     | <i>SHB</i>       | Body    |
| cg09077934 | 15 | 29,407,792  | 7.58E-06 | 0.324 | 0.289 |          |       |     | <i>APBA2</i>     | Body    |

|            |    |             |          |       |       |          |       |  |                 |         |
|------------|----|-------------|----------|-------|-------|----------|-------|--|-----------------|---------|
| cg10752158 | 4  | 81,185,022  | 7.47E-05 | 0.324 | 0.273 |          |       |  |                 |         |
| cg00961866 | 10 | 102,905,737 | 4.76E-08 | 0.324 | 0.354 |          |       |  |                 |         |
| cg13078563 | 15 | 27,016,796  | 0.000839 | 0.324 | 0.237 |          |       |  | <i>GABRB3</i>   | Body    |
| cg25757115 | 1  | 46,913,787  | 1.55E-10 | 0.324 | 0.285 |          |       |  |                 |         |
| cg09049251 | 12 | 50,297,477  | 4.7E-07  | 0.324 | 0.266 |          |       |  | <i>FAIM2</i>    | Body    |
| cg15963552 | 3  | 99,594,931  | 0.048519 | 0.324 | 0.412 |          |       |  | <i>C3orf26</i>  | Body    |
| cg21495612 | 14 | 96,342,250  | 0.010948 | 0.324 | 0.441 |          |       |  |                 |         |
| cg25044876 | 22 | 43,041,146  | 7.6E-09  | 0.324 | 0.284 |          |       |  | <i>CYB5R3</i>   | 5'UTR   |
| cg09276998 | 10 | 29,991,884  | 0.000747 | 0.324 | 0.249 |          |       |  | <i>SVIL</i>     | 5'UTR   |
| cg02968175 | 16 | 4,690,020   | 1.9E-19  | 0.324 | 0.289 |          |       |  | <i>MGRN1</i>    | Body    |
| cg14602839 | 17 | 63,060,161  | 2.01E-20 | 0.324 | 0.313 |          |       |  |                 |         |
| cg23741863 | 8  | 97,657,833  | 2.15E-05 | 0.324 | 0.235 |          |       |  | <i>PGCP</i>     | 5'UTR   |
| cg11716270 | 1  | 39,025,311  | 0.001558 | 0.324 | 0.276 |          |       |  |                 |         |
| cg13739115 | 10 | 121,094,427 | 5.32E-11 | 0.324 | 0.315 |          |       |  | <i>GRK5</i>     | Body    |
| cg09327714 | 1  | 91,316,253  | 0.000325 | 0.324 | 0.319 |          |       |  |                 |         |
| cg09967633 | 16 | 84,918,794  | 1.37E-05 | 0.323 | 0.281 |          |       |  | <i>CRISPLD2</i> | Body    |
| cg12664038 | 1  | 156,611,194 | 1.02E-09 | 0.323 | 0.365 |          |       |  | <i>BCAN</i>     | TSS1500 |
| cg23352146 | 11 | 12,701,929  | 6.16E-05 | 0.323 | 0.352 |          |       |  | <i>TEAD1</i>    | 5'UTR   |
| cg10758057 | 15 | 29,033,893  | 9.07E-06 | 0.323 | 0.341 |          |       |  |                 |         |
| cg08876932 | 11 | 71,955,547  | 5.41E-06 | 0.323 | 0.267 | 8.91E-11 | 0.189 |  | <i>PHOX2A</i>   | TSS1500 |
| cg04874782 | 2  | 241,900,108 | 0.000217 | 0.323 | 0.260 |          |       |  |                 |         |
| cg10630155 | 4  | 16,085,666  | 4.31E-28 | 0.323 | 0.304 |          |       |  | <i>PROM1</i>    | TSS200  |
| cg12686055 | 12 | 45,628,262  | 1.5E-16  | 0.323 | 0.280 |          |       |  | <i>ANO6</i>     | Body    |
| cg10303487 | 8  | 105,479,058 | 0.007735 | 0.323 | 0.315 | 7.42E-20 | 0.263 |  | <i>DPYS</i>     | 1stExon |
| cg14327531 | 10 | 8,097,331   | 2.65E-06 | 0.323 | 0.328 |          |       |  | <i>GATA3</i>    | 5'UTR   |
| cg16169675 | 13 | 113,594,722 | 2.16E-16 | 0.323 | 0.306 |          |       |  |                 |         |
| cg05507490 | 2  | 242,808,479 | 0.000503 | 0.323 | 0.376 |          |       |  |                 |         |
| cg10932018 | 5  | 54,516,487  | 2.35E-06 | 0.323 | 0.337 |          |       |  |                 |         |
| cg21438527 | 6  | 26,189,355  | 0.001955 | 0.323 | 0.285 |          |       |  | <i>HIST1H4D</i> | TSS200  |
| cg02656560 | 17 | 19,967,600  | 5.41E-30 | 0.323 | 0.306 |          |       |  |                 |         |
| cg05621157 | 13 | 99,404,279  | 2.25E-05 | 0.323 | 0.307 |          |       |  | <i>SLC15A1</i>  | Body    |
| cg13618979 | 19 | 16,186,840  | 4.38E-07 | 0.323 | 0.306 |          |       |  | <i>TPM4</i>     | Body    |
| cg06949439 | 1  | 206,729,034 | 1.17E-22 | 0.323 | 0.300 |          |       |  | <i>RASSF5</i>   | Body    |
| cg17443359 | 1  | 91,300,231  | 0.006884 | 0.323 | 0.424 |          |       |  |                 |         |

|            |    |             |          |       |       |          |       |  |                  |         |
|------------|----|-------------|----------|-------|-------|----------|-------|--|------------------|---------|
| cg22059073 | 22 | 17,602,570  | 1.91E-28 | 0.323 | 0.270 |          |       |  | <i>CECR6</i>     | TSS1500 |
| cg27603915 | 11 | 20,692,113  | 0.003104 | 0.323 | 0.320 |          |       |  | <i>NELL1</i>     | Body    |
| cg24909548 | 19 | 36,736,272  | 1.36E-06 | 0.323 | 0.227 |          |       |  |                  |         |
| cg04401986 | 4  | 81,189,927  | 0.005565 | 0.323 | 0.307 |          |       |  | <i>FGF5</i>      | Body    |
| cg25119690 | 3  | 55,524,048  | 0.022465 | 0.323 | 0.147 |          |       |  |                  |         |
| cg01718447 | 7  | 30,722,327  | 0.004228 | 0.323 | 0.487 |          |       |  | <i>CRHR2</i>     | TSS200  |
| cg17133668 | 1  | 162,792,177 | 6.42E-06 | 0.323 | 0.363 |          |       |  |                  |         |
| cg23483251 | X  | 119,445,319 | 3.68E-10 | 0.323 | 0.296 |          |       |  | <i>FAM70A</i>    | 1stExon |
| cg01313977 | 3  | 44,626,204  | 2.19E-07 | 0.323 | 0.220 |          |       |  | <i>ZNF660</i>    | TSS1500 |
| cg04273431 | 6  | 30,523,215  | 1.07E-30 | 0.323 | 0.311 |          |       |  | <i>GNL1</i>      | Body    |
| cg25122629 | 2  | 54,936,822  | 0.000297 | 0.323 | 0.266 |          |       |  |                  |         |
| cg09625066 | X  | 46,937,571  | 2.02E-21 | 0.323 | 0.314 | 1.65E-18 | 0.236 |  | <i>RGN</i>       | TSS1500 |
| cg03007522 | 8  | 11,562,685  | 6.64E-05 | 0.323 | 0.366 |          |       |  | <i>GATA4</i>     | 5'UTR   |
| cg21306240 | 1  | 38,230,845  | 0.004592 | 0.323 | 0.355 |          |       |  | <i>EPHA10</i>    | TSS200  |
| cg07654896 | X  | 46,937,829  | 0.000164 | 0.323 | 0.287 | 1.03E-15 | 0.273 |  | <i>RGN</i>       | 1stExon |
| cg02214783 | 1  | 3,688,257   | 3.06E-18 | 0.323 | 0.286 |          |       |  | <i>LOC388588</i> | TSS1500 |
| cg05407338 | 17 | 8,213,522   | 2.19E-07 | 0.323 | 0.333 |          |       |  | <i>ARHGEF15</i>  | TSS200  |
| cg02790379 | 1  | 22,140,769  | 1.58E-10 | 0.323 | 0.275 |          |       |  | <i>LDLRAD2</i>   | Body    |
| cg26503125 | 10 | 80,181,190  | 1.15E-20 | 0.323 | 0.298 |          |       |  |                  |         |
| cg04622024 | 1  | 38,201,001  | 4.47E-16 | 0.323 | 0.280 |          |       |  | <i>EPHA10</i>    | Body    |
| cg04319873 | 2  | 164,205,343 | 1.47E-12 | 0.323 | 0.319 |          |       |  |                  |         |
| cg23937816 | 8  | 91,997,231  | 1.17E-09 | 0.323 | 0.346 |          |       |  |                  |         |
| cg14127046 | 2  | 236,147,233 | 6.48E-09 | 0.323 | 0.309 |          |       |  |                  |         |
| cg01656955 | 1  | 40,137,966  | 5.69E-07 | 0.323 | 0.293 |          |       |  | <i>NT5C1A</i>    | TSS1500 |
| cg13031611 | 12 | 115,132,761 | 1.48E-26 | 0.323 | 0.286 |          |       |  |                  |         |
| cg14239515 | 19 | 38,885,242  | 0.00038  | 0.323 | 0.339 |          |       |  | <i>SPRED3</i>    | Body    |
| cg19782243 | 11 | 125,133,120 | 3.06E-17 | 0.323 | 0.324 |          |       |  | <i>PKNOX2</i>    | 5'UTR   |
| cg18180415 | 11 | 115,530,547 | 0.00018  | 0.323 | 0.285 |          |       |  |                  |         |
| cg26332253 | 6  | 121,758,729 | 3.76E-06 | 0.323 | 0.357 |          |       |  | <i>GJA1</i>      | 5'UTR   |
| cg17299437 | 4  | 54,974,644  | 0.000148 | 0.323 | 0.320 |          |       |  |                  |         |
| cg21079003 | 15 | 93,615,146  | 1.04E-05 | 0.323 | 0.306 |          |       |  | <i>RGMA</i>      | Body    |
| cg13514049 | 9  | 110,495,709 | 1.28E-15 | 0.323 | 0.329 |          |       |  |                  |         |
| cg00785170 | 1  | 201,438,757 | 3.64E-05 | 0.323 | 0.322 |          |       |  | <i>PHLDA3</i>    | TSS1500 |
| cg24405567 | 15 | 70,787,565  | 1.3E-13  | 0.323 | 0.300 |          |       |  |                  |         |

|            |    |             |          |       |       |          |       |     |                  |         |
|------------|----|-------------|----------|-------|-------|----------|-------|-----|------------------|---------|
| cg05031521 | 16 | 1,030,561   | 1.64E-10 | 0.323 | 0.320 |          |       |     | <i>SOX8</i>      | TSS1500 |
| cg23616139 | 1  | 221,051,907 | 4.26E-07 | 0.323 | 0.319 |          |       |     | <i>HLX</i>       | TSS1500 |
| cg09896412 | 1  | 98,519,101  | 2.76E-12 | 0.323 | 0.308 |          |       |     |                  |         |
| cg12264626 | 8  | 86,350,381  | 7.45E-10 | 0.323 | 0.320 |          |       |     | <i>CA3</i>       | TSS1500 |
| cg00536939 | 11 | 47,279,352  | 1.24E-09 | 0.323 | 0.293 |          |       |     | <i>NR1H3</i>     | TSS200  |
| cg04699104 | 2  | 12,858,912  | 0.00188  | 0.323 | 0.393 |          |       |     | <i>TRIB2</i>     | Body    |
| cg17385175 | X  | 23,350,552  | 0.011417 | 0.323 | 0.242 |          |       |     |                  |         |
| cg06169131 | 10 | 103,536,348 | 1.09E-09 | 0.323 | 0.305 |          |       |     | <i>FGF8</i>      | TSS1500 |
| cg17318990 | 12 | 90,101,606  | 0.001909 | 0.322 | 0.276 |          |       |     | <i>LOC338758</i> | TSS1500 |
| cg04178858 | 17 | 38,334,170  | 0.007773 | 0.322 | 0.235 |          |       |     | <i>RAPGEFL1</i>  | TSS200  |
| cg24577131 | 6  | 139,613,426 | 2.81E-09 | 0.322 | 0.329 |          |       |     | <i>TXLNB</i>     | TSS1500 |
| cg01472882 | 2  | 85,980,609  | 0.000002 | 0.322 | 0.272 |          |       |     | <i>ATOH8</i>     | TSS1500 |
| cg05664072 | 2  | 239,198,294 | 3.02E-11 | 0.322 | 0.269 | 3.69E-36 | 0.222 |     | <i>PER2</i>      | TSS1500 |
| cg12435551 | 1  | 118,679,290 | 2.88E-05 | 0.322 | 0.286 |          |       |     | <i>SPAG17</i>    | Body    |
| cg05151811 | 10 | 17,270,250  | 3.77E-06 | 0.322 | 0.356 |          |       |     | <i>VIM</i>       | TSS200  |
| cg23178308 | 21 | 45,148,879  | 3.78E-06 | 0.322 | 0.234 | 4.23E-25 | 0.224 |     | <i>PDXK</i>      | Body    |
| cg17892159 | 2  | 42,274,610  | 0.003391 | 0.322 | 0.329 |          |       |     | <i>PKDCC</i>     | TSS1500 |
| cg07974511 | 2  | 63,283,013  | 4.97E-07 | 0.322 | 0.323 |          |       |     | <i>OTX1</i>      | Body    |
| cg17343563 | 6  | 50,803,945  | 4.24E-07 | 0.322 | 0.331 |          |       |     | <i>TFAP2B</i>    | Body    |
| cg17410295 | 12 | 109,729,809 | 0.008849 | 0.322 | 0.227 |          |       |     | <i>FOXN4</i>     | Body    |
| cg20142377 | 6  | 29,910,206  | 3.02E-07 | 0.322 | 0.302 |          |       |     | <i>HLA-A</i>     | TSS200  |
| cg25750228 | 12 | 53,267,626  | 0.000621 | 0.322 | 0.247 |          |       |     |                  |         |
| cg08533773 | 5  | 113,392,004 | 9.24E-09 | 0.322 | 0.351 |          |       |     |                  |         |
| cg25833672 | 8  | 144,853,229 | 2.06E-05 | 0.322 | 0.280 |          |       |     |                  |         |
| cg03298700 | 2  | 220,295,753 | 6.33E-06 | 0.322 | 0.316 |          |       |     |                  |         |
| cg05050657 | 1  | 46,957,105  | 3.01E-06 | 0.322 | 0.342 |          |       |     |                  |         |
| cg23106912 | 1  | 85,464,261  | 1.61E-15 | 0.322 | 0.280 |          |       |     | <i>MCOLN2</i>    | TSS1500 |
| cg11500660 | 21 | 44,036,692  | 0.000208 | 0.322 | 0.254 |          |       |     |                  |         |
| cg11343211 | 17 | 15,686,309  | 0.003013 | 0.322 | 0.308 |          |       |     |                  |         |
| cg22746681 | 10 | 51,912,631  | 3.04E-06 | 0.322 | 0.249 |          |       |     |                  |         |
| cg14439761 | 9  | 19,788,317  | 0.007566 | 0.322 | 0.268 |          |       |     | <i>SLC24A2</i>   | TSS1500 |
| cg27432653 | 1  | 92,952,461  | 1.02E-07 | 0.322 | 0.326 |          |       | Yes | <i>GFI1</i>      | TSS1500 |
| cg12817840 | 5  | 124,070,989 | 1.4E-08  | 0.322 | 0.248 |          |       |     | <i>ZNF608</i>    | Body    |
| cg21335378 | 2  | 173,150,101 | 2.04E-09 | 0.322 | 0.274 |          |       |     |                  |         |

|            |    |             |          |       |       |          |       |  |                 |         |
|------------|----|-------------|----------|-------|-------|----------|-------|--|-----------------|---------|
| cg05096161 | 17 | 46,114,674  | 9.56E-06 | 0.322 | 0.333 |          |       |  | <i>MIR152</i>   | TSS200  |
| cg25773259 | 12 | 94,019,073  | 1.47E-11 | 0.322 | 0.340 |          |       |  |                 |         |
| cg00174901 | 19 | 709,889     | 9.23E-15 | 0.322 | 0.334 | 8.45E-31 | 0.194 |  | <i>PALM</i>     | Body    |
| cg01175020 | 10 | 102,896,475 | 1.12E-11 | 0.322 | 0.303 |          |       |  | <i>TLX1</i>     | Body    |
| cg03127334 | 21 | 40,033,634  | 0.000241 | 0.322 | 0.221 |          |       |  | <i>ERG</i>      | 5'UTR   |
| cg16886987 | 21 | 38,378,634  | 0.00332  | 0.322 | 0.229 |          |       |  | <i>DSCR6</i>    | TSS1500 |
| cg23320056 | 1  | 155,948,742 | 5.24E-13 | 0.322 | 0.263 | 2.25E-31 | 0.140 |  | <i>ARHGEF2</i>  | TSS1500 |
| cg18725573 | 20 | 62,368,956  | 0.000875 | 0.322 | 0.295 |          |       |  | <i>LIME1</i>    | Body    |
| cg20723355 | 17 | 6,679,597   | 4.96E-05 | 0.322 | 0.276 | 4.45E-15 | 0.217 |  | <i>FBXO39</i>   | 5'UTR   |
| cg01524853 | 12 | 54,447,807  | 5.94E-14 | 0.322 | 0.288 |          |       |  | <i>HOXC4</i>    | 1stExon |
| cg24520538 | 6  | 42,739,049  | 9.03E-23 | 0.322 | 0.305 |          |       |  |                 |         |
| cg00462430 | 1  | 232,608,508 | 6.67E-11 | 0.322 | 0.333 |          |       |  | <i>SIPA1L2</i>  | Body    |
| cg25585712 | 4  | 41,869,213  | 9.15E-18 | 0.322 | 0.305 |          |       |  |                 |         |
| cg24803391 | 7  | 21,209,338  | 3.45E-10 | 0.322 | 0.285 |          |       |  |                 |         |
| cg19058865 | 19 | 4,327,350   | 1.4E-06  | 0.322 | 0.321 |          |       |  | <i>STAP2</i>    | Body    |
| cg02151779 | X  | 48,327,875  | 5.7E-07  | 0.322 | 0.311 |          |       |  | <i>SLC38A5</i>  | 5'UTR   |
| cg02900441 | 1  | 15,911,134  | 0.020849 | 0.322 | 0.252 |          |       |  | <i>AGMAT</i>    | Body    |
| cg01572891 | 7  | 4,184,354   | 8.67E-20 | 0.322 | 0.337 |          |       |  | <i>SDK1</i>     | Body    |
| cg21000227 | 17 | 70,216,183  | 2.01E-05 | 0.322 | 0.344 |          |       |  |                 |         |
| cg06855337 | 2  | 189,489,191 | 9.69E-09 | 0.322 | 0.308 |          |       |  |                 |         |
| cg04060366 | 6  | 168,079,025 | 4.91E-07 | 0.322 | 0.254 |          |       |  |                 |         |
| cg01076971 | 8  | 97,657,803  | 0.008874 | 0.322 | 0.197 |          |       |  | <i>PGCP</i>     | 5'UTR   |
| cg09770579 | 16 | 17,407,429  | 4.08E-08 | 0.322 | 0.296 |          |       |  | <i>XYLT1</i>    | Body    |
| cg24360909 | 15 | 49,189,538  | 1.8E-13  | 0.322 | 0.286 |          |       |  | <i>SHC4</i>     | Body    |
| cg19777067 | 4  | 174,440,103 | 0.000431 | 0.322 | 0.298 |          |       |  |                 |         |
| cg20134151 | 6  | 150,463,500 | 4.54E-08 | 0.322 | 0.235 | 2.51E-28 | 0.242 |  | <i>PPP1R14C</i> | TSS1500 |
| cg26596964 | 10 | 102,495,354 | 0.002217 | 0.322 | 0.309 |          |       |  |                 |         |
| cg11664987 | 1  | 38,201,123  | 4.74E-07 | 0.322 | 0.268 |          |       |  | <i>EPHA10</i>   | Body    |
| cg25370658 | 6  | 7,673,306   | 1.05E-22 | 0.322 | 0.293 |          |       |  |                 |         |
| cg17719053 | 1  | 75,198,211  | 7.73E-05 | 0.322 | 0.349 |          |       |  | <i>TYW3</i>     | TSS1500 |
| cg26624398 | 5  | 168,726,889 | 2.6E-05  | 0.321 | 0.262 |          |       |  | <i>SLIT3</i>    | Body    |
| cg19989295 | 14 | 24,641,077  | 1.96E-10 | 0.321 | 0.318 |          |       |  | <i>REC8</i>     | TSS200  |
| cg03469862 | 11 | 68,924,853  | 2.71E-14 | 0.321 | 0.305 |          |       |  |                 |         |
| cg14601444 | 2  | 74,607,536  | 3.87E-23 | 0.321 | 0.331 |          |       |  | <i>DCTN1</i>    | TSS200  |

|            |    |             |          |       |       |           |       |  |                  |         |
|------------|----|-------------|----------|-------|-------|-----------|-------|--|------------------|---------|
| cg05411132 | X  | 99,195,115  | 2.32E-09 | 0.321 | 0.283 |           |       |  | <i>LOC442459</i> | TSS1500 |
| cg25835179 | 11 | 67,418,291  | 4.07E-13 | 0.321 | 0.320 |           |       |  | <i>ACY3</i>      | TSS200  |
| cg02028751 | 17 | 74,378,849  | 6.18E-05 | 0.321 | 0.241 |           |       |  |                  |         |
| cg25551714 | 11 | 116,452,003 | 0.001556 | 0.321 | 0.388 |           |       |  |                  |         |
| cg27645955 | 22 | 21,386,885  | 0.013854 | 0.321 | 0.131 |           |       |  | <i>SLC7A4</i>    | TSS200  |
| cg06223539 | 11 | 70,517,374  | 6.76E-06 | 0.321 | 0.321 |           |       |  | <i>SHANK2</i>    | Body    |
| cg09999348 | 2  | 46,398,848  | 3.17E-18 | 0.321 | 0.304 |           |       |  | <i>PRKCE</i>     | Body    |
| cg20717768 | 19 | 46,379,763  | 2.03E-18 | 0.321 | 0.302 |           |       |  |                  |         |
| cg13774080 | X  | 134,156,809 | 9.79E-14 | 0.321 | 0.301 |           |       |  | <i>FAM127C</i>   | TSS1500 |
| cg04858616 | 1  | 40,255,010  | 0.014406 | 0.321 | 0.195 |           |       |  | <i>BMP8B</i>     | TSS1500 |
| cg02081266 | 17 | 59,529,618  | 1.57E-07 | 0.321 | 0.315 |           |       |  |                  |         |
| cg24367957 | 1  | 161,931,993 | 5.36E-20 | 0.321 | 0.317 |           |       |  |                  |         |
| cg05166871 | 17 | 46,233,714  | 6.07E-16 | 0.321 | 0.284 |           |       |  | <i>SKAP1</i>     | Body    |
| cg25486143 | 3  | 50,378,527  | 7.06E-10 | 0.321 | 0.318 |           |       |  | <i>RASSF1</i>    | TSS200  |
| cg00152041 | 20 | 61,274,867  | 6.04E-14 | 0.321 | 0.319 |           |       |  | <i>SLCO4A1</i>   | 5'UTR   |
| cg16195091 | 17 | 76,227,996  | 0.00065  | 0.321 | 0.321 |           |       |  | <i>LOC283999</i> | Body    |
| cg23733123 | 10 | 99,472,988  | 1.86E-12 | 0.321 | 0.319 |           |       |  | <i>MARVELD1</i>  | TSS1500 |
| cg03467825 | 2  | 171,551,893 | 1.11E-06 | 0.321 | 0.322 |           |       |  |                  |         |
| cg06223767 | 6  | 393,616     | 0.003321 | 0.321 | 0.261 |           |       |  | <i>IRF4</i>      | Body    |
| cg11456756 | 6  | 30,228,069  | 0.00037  | 0.321 | 0.311 |           |       |  | <i>HLA-L</i>     | Body    |
| cg16516400 | 1  | 231,177,201 | 0.001371 | 0.321 | 0.295 | 0.0000266 | 0.099 |  | <i>FAM89A</i>    | TSS1500 |
| cg18147543 | 1  | 16,276,294  | 1.52E-36 | 0.321 | 0.304 |           |       |  | <i>ZBTB17</i>    | 5'UTR   |
| cg13636404 | 7  | 99,155,673  | 0.000371 | 0.321 | 0.243 | 8.5E-19   | 0.131 |  | <i>ZNF655</i>    | TSS1500 |
| cg09730500 | 16 | 57,662,690  | 1.09E-20 | 0.321 | 0.296 |           |       |  | <i>GPR56</i>     | 5'UTR   |
| cg27239280 | 16 | 30,907,679  | 2.84E-06 | 0.321 | 0.308 |           |       |  | <i>CTF1</i>      | TSS1500 |
| cg22455667 | 6  | 29,895,037  | 1.94E-09 | 0.321 | 0.268 |           |       |  |                  |         |
| cg03096954 | 16 | 85,347,426  | 6.89E-17 | 0.321 | 0.339 |           |       |  |                  |         |
| cg04607844 | 1  | 213,090,203 | 2.76E-08 | 0.321 | 0.314 |           |       |  |                  |         |
| cg04682791 | 6  | 25,313,030  | 2.97E-17 | 0.321 | 0.340 |           |       |  | <i>LRRC16A</i>   | Body    |
| cg00338116 | 13 | 43,566,313  | 4.46E-06 | 0.321 | 0.333 |           |       |  | <i>EPSTI1</i>    | 5'UTR   |
| cg14858267 | 3  | 44,037,760  | 3.76E-06 | 0.321 | 0.390 |           |       |  |                  |         |
| cg24685601 | 1  | 20,512,550  | 5.1E-05  | 0.321 | 0.294 |           |       |  | <i>UBXN10</i>    | TSS200  |
| cg22907789 | 17 | 75,567,709  | 0.000341 | 0.321 | 0.290 |           |       |  |                  |         |
| cg19516515 | 1  | 155,290,614 | 7.67E-05 | 0.321 | 0.334 |           |       |  | <i>RUSC1</i>     | TSS200  |

|            |    |             |          |       |       |  |  |  |                 |         |
|------------|----|-------------|----------|-------|-------|--|--|--|-----------------|---------|
| cg10120657 | 17 | 77,786,354  | 3.7E-07  | 0.321 | 0.316 |  |  |  |                 |         |
| cg10536999 | 7  | 26,193,109  | 0.00414  | 0.321 | 0.197 |  |  |  | <i>NFE2L3</i>   | Body    |
| cg07536910 | 2  | 176,948,105 | 2.35E-05 | 0.321 | 0.326 |  |  |  | <i>EVX2</i>     | 1stExon |
| cg08812692 | 5  | 178,052,235 | 2.67E-10 | 0.321 | 0.324 |  |  |  | <i>CLK4</i>     | 5'UTR   |
| cg25335841 | 7  | 38,351,094  | 0.005083 | 0.321 | 0.122 |  |  |  |                 |         |
| cg05794117 | 1  | 228,394,559 | 1.69E-14 | 0.321 | 0.271 |  |  |  | <i>OBSCN</i>    | TSS1500 |
| cg16082336 | 14 | 21,539,712  | 0.000789 | 0.321 | 0.216 |  |  |  | <i>FLJ10357</i> | Body    |
| cg13644317 | 18 | 70,536,461  | 8.44E-09 | 0.321 | 0.282 |  |  |  |                 |         |
| cg10442157 | 11 | 61,284,134  | 1.59E-20 | 0.321 | 0.316 |  |  |  | <i>SYT7</i>     | 3'UTR   |
| cg17083323 | 6  | 50,803,820  | 2.09E-06 | 0.321 | 0.313 |  |  |  | <i>TFAP2B</i>   | Body    |
| cg03671075 | 4  | 78,573,680  | 7.44E-07 | 0.321 | 0.282 |  |  |  |                 |         |
| cg13507084 | 9  | 34,555,042  | 5.89E-10 | 0.321 | 0.290 |  |  |  | <i>CNTFR</i>    | Body    |
| cg04421973 | 3  | 64,670,907  | 0.00074  | 0.321 | 0.188 |  |  |  | <i>ADAMTS9</i>  | Body    |
| cg09815769 | 1  | 119,539,738 | 9.82E-12 | 0.321 | 0.282 |  |  |  |                 |         |
| cg18327157 | 7  | 157,486,718 | 6.64E-19 | 0.321 | 0.318 |  |  |  | <i>PTPRN2</i>   | Body    |
| cg26173847 | 7  | 127,671,017 | 0.029431 | 0.321 | 0.196 |  |  |  | <i>LRRC4</i>    | TSS200  |
| cg18391694 | 1  | 43,250,900  | 1.36E-09 | 0.321 | 0.288 |  |  |  |                 |         |
| cg04566848 | 6  | 29,974,715  | 2.91E-07 | 0.320 | 0.327 |  |  |  | <i>HLA-J</i>    | Body    |
| cg04111789 | 6  | 41,908,262  | 0.000221 | 0.320 | 0.205 |  |  |  | <i>CCND3</i>    | Body    |
| cg24663970 | 13 | 97,647,084  | 0.00074  | 0.320 | 0.360 |  |  |  | <i>OXGR1</i>    | TSS1500 |
| cg10574566 | 1  | 203,377,808 | 2.75E-12 | 0.320 | 0.344 |  |  |  |                 |         |
| cg08712932 | 6  | 133,562,463 | 8.82E-05 | 0.320 | 0.377 |  |  |  | <i>EYA4</i>     | TSS200  |
| cg21468728 | 17 | 27,918,207  | 7.28E-10 | 0.320 | 0.306 |  |  |  |                 |         |
| cg16688582 | 7  | 28,386,631  | 5.07E-17 | 0.320 | 0.301 |  |  |  | <i>CREB5</i>    | 5'UTR   |
| cg02928664 | 19 | 54,976,506  | 5.93E-09 | 0.320 | 0.312 |  |  |  | <i>CDC42EP5</i> | Body    |
| cg24375409 | 1  | 38,200,920  | 9.32E-13 | 0.320 | 0.303 |  |  |  | <i>EPHA10</i>   | Body    |
| cg18727742 | 11 | 288,301     | 0.002277 | 0.320 | 0.250 |  |  |  | <i>ATHL1</i>    | TSS1500 |
| cg20619808 | 17 | 27,313,499  | 8.2E-20  | 0.320 | 0.271 |  |  |  | <i>SEZ6</i>     | Body    |
| cg09210933 | X  | 73,641,881  | 0.001013 | 0.320 | 0.141 |  |  |  | <i>SLC16A2</i>  | 1stExon |
| cg15006175 | 8  | 145,698,660 | 1.09E-08 | 0.320 | 0.308 |  |  |  | <i>KIFC2</i>    | Body    |
| cg00557947 | 10 | 102,419,245 | 0.023174 | 0.320 | 0.417 |  |  |  |                 |         |
| cg19997946 | 6  | 166,399,986 | 4.12E-05 | 0.320 | 0.285 |  |  |  | <i>C6orf176</i> | Body    |
| cg25103417 | 3  | 157,812,018 | 1.47E-08 | 0.320 | 0.329 |  |  |  |                 |         |
| cg13612083 | 6  | 127,836,053 | 1.67E-11 | 0.320 | 0.306 |  |  |  | <i>C6orf174</i> | Body    |



|            |    |             |          |       |       |          |       |  |                  |         |
|------------|----|-------------|----------|-------|-------|----------|-------|--|------------------|---------|
| cg13481638 | 11 | 91,957,660  | 5.69E-07 | 0.320 | 0.315 |          |       |  |                  |         |
| cg10347326 | X  | 133,684,177 | 0.005975 | 0.320 | 0.191 |          |       |  |                  |         |
| cg00920348 | 1  | 66,999,304  | 0.001722 | 0.320 | 0.251 |          |       |  | <i>SGIP1</i>     | TSS1500 |
| cg20544372 | 7  | 74,064,549  | 4.1E-05  | 0.320 | 0.376 |          |       |  |                  |         |
| cg03586474 | 6  | 137,242,147 | 5.3E-06  | 0.320 | 0.340 |          |       |  | <i>SLC35D3</i>   | TSS1500 |
| cg08942939 | 1  | 119,532,542 | 2.18E-05 | 0.320 | 0.297 |          |       |  | <i>TBX15</i>     | TSS1500 |
| cg07695771 | 10 | 126,029,702 | 5.28E-18 | 0.320 | 0.315 |          |       |  |                  |         |
| cg07907386 | 4  | 41,749,443  | 0.000347 | 0.320 | 0.365 |          |       |  | <i>PHOX2B</i>    | Body    |
| cg04579493 | 13 | 100,609,947 | 0.001597 | 0.320 | 0.339 |          |       |  |                  |         |
| cg07186765 | 7  | 30,633,504  | 6.94E-11 | 0.320 | 0.254 |          |       |  | <i>GARS</i>      | TSS1500 |
| cg05240059 | X  | 124,340,398 | 5.49E-12 | 0.320 | 0.274 |          |       |  |                  |         |
| cg18891824 | 8  | 49,783,652  | 6.25E-36 | 0.320 | 0.290 |          |       |  |                  |         |
| cg23205426 | X  | 152,066,221 | 0.035385 | 0.320 | 0.127 |          |       |  |                  |         |
| cg26403843 | 5  | 158,634,085 | 3.41E-05 | 0.320 | 0.350 |          |       |  | <i>RNF145</i>    | Body    |
| cg01816515 | 2  | 21,022,699  | 0.000209 | 0.320 | 0.280 |          |       |  | <i>C2orf43</i>   | 5'UTR   |
| cg17980404 | 17 | 38,601,676  | 1.29E-21 | 0.320 | 0.315 |          |       |  | <i>IGFBP4</i>    | Body    |
| cg01407244 | 8  | 22,961,007  | 0.000991 | 0.320 | 0.258 | 8.61E-14 | 0.176 |  | <i>TNFRSF10C</i> | Body    |
| cg12840719 | 9  | 21,968,233  | 7.92E-06 | 0.320 | 0.325 |          |       |  | <i>CDKN2A</i>    | Body    |
| cg14483244 | 17 | 42,173,343  | 0.000789 | 0.320 | 0.264 |          |       |  | <i>HDAC5</i>     | Body    |
| cg06834506 | 2  | 26,396,964  | 0.00019  | 0.320 | 0.337 |          |       |  | <i>FAM59B</i>    | Body    |
| cg25691167 | 7  | 19,184,961  | 0.000918 | 0.320 | 0.298 | 3.31E-13 | 0.206 |  | <i>FERD3L</i>    | 1stExon |
| cg11731596 | 17 | 15,821,130  | 6.98E-18 | 0.320 | 0.291 |          |       |  |                  |         |
| cg07713896 | 8  | 94,712,367  | 0.000657 | 0.320 | 0.198 |          |       |  | <i>FAM92A1</i>   | TSS1500 |
| cg00725401 | 8  | 70,945,169  | 2.25E-12 | 0.320 | 0.342 |          |       |  |                  |         |
| cg02558026 | 16 | 30,904,573  | 2.29E-10 | 0.320 | 0.292 |          |       |  | <i>MIR762</i>    | TSS1500 |
| cg05209514 | 12 | 69,353,500  | 9.24E-12 | 0.320 | 0.287 |          |       |  | <i>CPM</i>       | 5'UTR   |
| cg26890354 | 5  | 140,864,020 | 2.83E-05 | 0.320 | 0.343 |          |       |  | <i>PCDHGA4</i>   | Body    |
| cg01180552 | 16 | 54,316,931  | 8.08E-17 | 0.320 | 0.293 |          |       |  |                  |         |
| cg04308040 | 13 | 44,942,303  | 4.95E-11 | 0.320 | 0.323 |          |       |  |                  |         |
| cg10375954 | 1  | 6,419,608   | 4.03E-17 | 0.320 | 0.307 |          |       |  | <i>ACOT7</i>     | Body    |
| cg01984743 | 5  | 172,751,331 | 0.031585 | 0.320 | 0.397 |          |       |  | <i>STC2</i>      | Body    |
| cg08336425 | 12 | 125,140,167 | 4.99E-08 | 0.320 | 0.344 |          |       |  |                  |         |
| cg19414980 | 7  | 92,673,176  | 1.05E-13 | 0.320 | 0.338 |          |       |  |                  |         |
| cg22242148 | 15 | 74,215,283  | 4.96E-19 | 0.320 | 0.306 |          |       |  |                  |         |

|            |    |             |          |       |       |           |       |  |                 |         |
|------------|----|-------------|----------|-------|-------|-----------|-------|--|-----------------|---------|
| cg12252135 | 17 | 79,503,877  | 0.000727 | 0.320 | 0.289 |           |       |  | <i>FSCN2</i>    | Body    |
| cg03660115 | 3  | 87,138,400  | 6.88E-05 | 0.320 | 0.251 |           |       |  |                 |         |
| cg19847283 | 19 | 20,349,250  | 0.019568 | 0.320 | 0.158 |           |       |  |                 |         |
| cg08217163 | 2  | 66,809,959  | 1.1E-05  | 0.320 | 0.338 |           |       |  |                 |         |
| cg20922422 | X  | 24,665,669  | 0.007936 | 0.320 | 0.336 | 0.0000151 | 0.120 |  | <i>PCYT1B</i>   | Body    |
| cg10242602 | 4  | 188,916,875 | 7.51E-06 | 0.320 | 0.292 |           |       |  | <i>ZFP42</i>    | TSS200  |
| cg22192069 | 6  | 13,305,324  | 6.25E-49 | 0.320 | 0.302 |           |       |  | <i>TBC1D7</i>   | 3'UTR   |
| cg00268185 | 3  | 123,602,768 | 0.002166 | 0.320 | 0.316 |           |       |  | <i>MYLK</i>     | 5'UTR   |
| cg10873171 | 7  | 44,145,333  | 4.66E-15 | 0.320 | 0.307 |           |       |  | <i>AEBP1</i>    | Body    |
| cg14889643 | 18 | 60,985,636  | 0.002461 | 0.320 | 0.334 |           |       |  | <i>BCL2</i>     | Body    |
| cg01177167 | 10 | 101,280,523 | 5.02E-07 | 0.319 | 0.332 |           |       |  |                 |         |
| cg07890238 | 8  | 8,182,454   | 2.41E-14 | 0.319 | 0.303 |           |       |  | <i>PRAGMIN</i>  | Body    |
| cg26069230 | 17 | 29,250,073  | 2.91E-10 | 0.319 | 0.322 |           |       |  | <i>ADAP2</i>    | Body    |
| cg04569837 | 5  | 60,921,535  | 0.000909 | 0.319 | 0.308 |           |       |  |                 |         |
| cg25599902 | 1  | 51,567,771  | 3.11E-07 | 0.319 | 0.266 |           |       |  | <i>C1orf185</i> | TSS200  |
| cg24128931 | 21 | 44,013,597  | 0.018551 | 0.319 | 0.235 |           |       |  |                 |         |
| cg00178850 | 1  | 236,559,675 | 0.005786 | 0.319 | 0.101 |           |       |  | <i>EDARADD</i>  | Body    |
| cg10101600 | 2  | 43,478,743  | 3.09E-23 | 0.319 | 0.305 |           |       |  | <i>THADA</i>    | Body    |
| cg27272677 | 10 | 102,891,080 | 0.013005 | 0.319 | 0.240 |           |       |  | <i>TLX1NB</i>   | TSS200  |
| cg21620246 | 3  | 126,854,423 | 0.037225 | 0.319 | 0.232 |           |       |  |                 |         |
| cg26773567 | 10 | 82,173,535  | 3.85E-08 | 0.319 | 0.296 |           |       |  | <i>C10orf58</i> | TSS200  |
| cg19706516 | 1  | 151,103,869 | 0.000491 | 0.319 | 0.281 |           |       |  |                 |         |
| cg17558126 | 1  | 206,680,250 | 1.22E-13 | 0.319 | 0.262 | 9.62E-21  | 0.218 |  | <i>RASSF5</i>   | TSS1500 |
| cg22471726 | 17 | 46,719,276  | 2.7E-06  | 0.319 | 0.321 |           |       |  |                 |         |
| cg15994467 | 12 | 52,401,523  | 2.58E-09 | 0.319 | 0.314 |           |       |  | <i>GRASP</i>    | Body    |
| cg05907976 | 6  | 29,760,028  | 0.000814 | 0.319 | 0.361 |           |       |  | <i>HCG4</i>     | Body    |
| cg08511651 | 6  | 26,017,619  | 3.57E-10 | 0.319 | 0.293 |           |       |  | <i>HIST1H1A</i> | 1stExon |
| cg13523557 | 7  | 45,613,725  | 2.73E-07 | 0.319 | 0.245 | 1.5E-29   | 0.193 |  | <i>ADCY1</i>    | TSS1500 |
| cg24522254 | 2  | 174,878,113 | 4.27E-15 | 0.319 | 0.299 |           |       |  |                 |         |
| cg07352345 | 5  | 175,793,049 | 0.018251 | 0.319 | 0.365 |           |       |  | <i>ARL10</i>    | Body    |
| cg18448949 | 2  | 176,993,089 | 1.81E-05 | 0.319 | 0.287 |           |       |  | <i>HOXD8</i>    | TSS1500 |
| cg22637538 | 17 | 7,348,327   | 2.51E-10 | 0.319 | 0.278 |           |       |  | <i>CHRN1</i>    | TSS200  |
| cg13150925 | 12 | 124,529,439 | 5.06E-11 | 0.319 | 0.300 |           |       |  |                 |         |
| cg14482308 | 2  | 18,059,109  | 0.000103 | 0.319 | 0.233 |           |       |  | <i>KCNS3</i>    | TSS1500 |

|            |    |             |          |       |       |  |  |  |                 |         |
|------------|----|-------------|----------|-------|-------|--|--|--|-----------------|---------|
| cg25565383 | 2  | 17,699,773  | 0.029066 | 0.319 | 0.342 |  |  |  | <i>RAD51AP2</i> | TSS200  |
| cg04976685 | 17 | 43,449,285  | 0.006141 | 0.319 | 0.314 |  |  |  |                 |         |
| cg16331823 | 6  | 30,711,835  | 0.008438 | 0.319 | 0.345 |  |  |  | <i>FLOT1</i>    | TSS1500 |
| cg20945853 | 5  | 133,406,542 | 0.000108 | 0.319 | 0.158 |  |  |  |                 |         |
| cg15126957 | 5  | 179,246,594 | 2.21E-10 | 0.319 | 0.281 |  |  |  | <i>SQSTM1</i>   | 5'UTR   |
| cg12161228 | 11 | 89,224,506  | 1.08E-12 | 0.319 | 0.326 |  |  |  | <i>NOX4</i>     | 1stExon |
| cg26788916 | 20 | 62,461,539  | 1.02E-11 | 0.319 | 0.254 |  |  |  |                 |         |
| cg08308801 | 10 | 119,867,973 | 3.05E-09 | 0.319 | 0.266 |  |  |  | <i>CASC2</i>    | Body    |
| cg23533419 | 12 | 54,090,519  | 3.06E-08 | 0.319 | 0.245 |  |  |  |                 |         |
| cg20396510 | 5  | 66,124,588  | 0.001161 | 0.319 | 0.139 |  |  |  | <i>MAST4</i>    | TSS200  |
| cg02433882 | 6  | 44,187,031  | 0.000634 | 0.319 | 0.262 |  |  |  | <i>SLC29A1</i>  | TSS1500 |
| cg08030987 | 4  | 83,675,202  | 1.99E-20 | 0.319 | 0.302 |  |  |  | <i>MIR575</i>   | TSS1500 |
| cg12659883 | 1  | 119,543,057 | 2.87E-08 | 0.319 | 0.305 |  |  |  |                 |         |
| cg25498489 | 17 | 8,230,483   | 1.78E-06 | 0.319 | 0.276 |  |  |  |                 |         |
| cg14323199 | 17 | 60,705,839  | 8.62E-05 | 0.319 | 0.302 |  |  |  | <i>MRC2</i>     | Body    |
| cg01786048 | 2  | 239,035,964 | 9.54E-10 | 0.319 | 0.286 |  |  |  | <i>ESPNL</i>    | Body    |
| cg08120986 | 2  | 218,816,280 | 1.96E-18 | 0.319 | 0.302 |  |  |  |                 |         |
| cg16650529 | 2  | 182,548,750 | 0.000498 | 0.319 | 0.220 |  |  |  |                 |         |
| cg06755262 | 6  | 14,824,437  | 5.82E-22 | 0.319 | 0.336 |  |  |  |                 |         |
| cg26090107 | 11 | 60,718,882  | 7.06E-08 | 0.319 | 0.319 |  |  |  | <i>SLC15A3</i>  | 1stExon |
| cg05001389 | 9  | 135,853,034 | 1.79E-07 | 0.319 | 0.235 |  |  |  | <i>GFI1B</i>    | TSS1500 |
| cg26663609 | 5  | 691,161     | 8.8E-09  | 0.319 | 0.299 |  |  |  | <i>TPPP</i>     | 5'UTR   |
| cg08105396 | 1  | 153,539,058 | 0.000161 | 0.319 | 0.348 |  |  |  | <i>S100A2</i>   | TSS1500 |
| cg04991805 | 10 | 99,790,910  | 3.28E-05 | 0.319 | 0.270 |  |  |  | <i>CRTAC1</i>   | TSS1500 |
| cg00146951 | 10 | 17,270,376  | 5.4E-07  | 0.319 | 0.331 |  |  |  | <i>VIM</i>      | 5'UTR   |
| cg09159285 | 1  | 6,664,134   | 1E-20    | 0.319 | 0.295 |  |  |  | <i>KLHL21</i>   | TSS1500 |
| cg08146609 | 7  | 18,535,232  | 6.73E-05 | 0.319 | 0.281 |  |  |  | <i>HDAC9</i>    | TSS1500 |
| cg15391601 | 19 | 35,849,176  | 0.003076 | 0.319 | 0.332 |  |  |  | <i>FFAR3</i>    | TSS1500 |
| cg19416073 | 2  | 96,093,031  | 2.41E-20 | 0.319 | 0.299 |  |  |  |                 |         |
| cg03064940 | 2  | 129,320,987 | 1.92E-08 | 0.319 | 0.294 |  |  |  |                 |         |
| cg06206881 | 12 | 5,620,842   | 3.05E-05 | 0.319 | 0.312 |  |  |  |                 |         |
| cg17082405 | 8  | 145,033,328 | 4.58E-13 | 0.319 | 0.310 |  |  |  | <i>PLEC1</i>    | Body    |
| cg00874055 | 1  | 236,306,673 | 0.004384 | 0.319 | 0.183 |  |  |  | <i>GPR137B</i>  | Body    |
| cg05020252 | 2  | 233,499,283 | 5.92E-08 | 0.319 | 0.291 |  |  |  | <i>EFHD1</i>    | Body    |

|            |    |             |          |       |       |  |  |  |     |                  |         |
|------------|----|-------------|----------|-------|-------|--|--|--|-----|------------------|---------|
| cg21384402 | 10 | 105,036,701 | 0.006241 | 0.319 | 0.277 |  |  |  |     | <i>INA</i>       | TSS1500 |
| cg12638731 | 13 | 36,045,281  | 0.000125 | 0.319 | 0.323 |  |  |  |     | <i>NBEA</i>      | Body    |
| cg16132520 | 7  | 134,143,906 | 0.004678 | 0.319 | 0.224 |  |  |  |     | <i>AKR1B1</i>    | TSS200  |
| cg11014124 | 5  | 140,782,297 | 1.61E-05 | 0.319 | 0.381 |  |  |  |     | <i>PCDHGA4</i>   | Body    |
| cg23893898 | 4  | 6,247,571   | 1.87E-05 | 0.319 | 0.255 |  |  |  |     |                  |         |
| cg10251070 | 21 | 44,781,958  | 3.82E-19 | 0.318 | 0.301 |  |  |  |     |                  |         |
| cg01589129 | 4  | 74,810,017  | 0.017269 | 0.318 | 0.350 |  |  |  |     |                  |         |
| cg17577122 | 22 | 19,511,967  | 0.000914 | 0.318 | 0.327 |  |  |  |     | <i>CLDN5</i>     | 1stExon |
| cg13198321 | 15 | 58,357,891  | 0.006221 | 0.318 | 0.317 |  |  |  |     | <i>ALDH1A2</i>   | 5'UTR   |
| cg10426464 | 15 | 62,457,529  | 0.000298 | 0.318 | 0.358 |  |  |  |     | <i>C2CD4B</i>    | TSS200  |
| cg24909309 | 8  | 38,387,291  | 5.08E-20 | 0.318 | 0.305 |  |  |  |     | <i>C8orf86</i>   | TSS1500 |
| cg02639634 | 8  | 54,792,161  | 1.16E-08 | 0.318 | 0.286 |  |  |  |     | <i>RGS20</i>     | Body    |
| cg08980198 | 7  | 150,676,529 | 2.71E-05 | 0.318 | 0.239 |  |  |  |     |                  |         |
| cg17429772 | 7  | 158,269,409 | 5.7E-11  | 0.318 | 0.326 |  |  |  |     | <i>PTPRN2</i>    | Body    |
| cg20999347 | 6  | 30,095,517  | 5.72E-20 | 0.318 | 0.283 |  |  |  | Yes |                  |         |
| cg05850327 | 13 | 20,768,236  | 2E-08    | 0.318 | 0.299 |  |  |  |     | <i>GJB2</i>      | TSS1500 |
| cg10588362 | 11 | 64,728,445  | 0.002894 | 0.318 | 0.315 |  |  |  |     | <i>C11orf85</i>  | TSS1500 |
| cg18614735 | 8  | 41,583,523  | 7.26E-10 | 0.318 | 0.319 |  |  |  |     | <i>ANK1</i>      | Body    |
| cg05897030 | 12 | 27,702,201  | 6.46E-13 | 0.318 | 0.339 |  |  |  |     | <i>PPFIBP1</i>   | 5'UTR   |
| cg08549661 | 2  | 131,185,585 | 3.97E-05 | 0.318 | 0.335 |  |  |  |     |                  |         |
| cg14775423 | 4  | 57,372,356  | 7.29E-11 | 0.318 | 0.334 |  |  |  |     | <i>ARL9</i>      | 5'UTR   |
| cg20894686 | 6  | 50,803,903  | 1.32E-07 | 0.318 | 0.339 |  |  |  |     | <i>TFAP2B</i>    | Body    |
| cg06420903 | 16 | 88,186,669  | 1.48E-28 | 0.318 | 0.304 |  |  |  |     |                  |         |
| cg17985646 | 7  | 35,293,759  | 0.008575 | 0.318 | 0.339 |  |  |  |     | <i>TBX20</i>     | TSS200  |
| cg12349884 | 6  | 27,106,988  | 7.92E-07 | 0.318 | 0.299 |  |  |  |     | <i>HIST1H2BK</i> | 3'UTR   |
| cg15110403 | 19 | 17,392,923  | 0.002558 | 0.318 | 0.273 |  |  |  |     | <i>ANKLE1</i>    | Body    |
| cg19276110 | 1  | 20,396,593  | 2.59E-12 | 0.318 | 0.316 |  |  |  |     | <i>PLA2G5</i>    | TSS200  |
| cg03965496 | 1  | 147,718,157 | 2.94E-08 | 0.318 | 0.319 |  |  |  |     |                  |         |
| cg22474464 | 20 | 21,492,914  | 0.010438 | 0.318 | 0.444 |  |  |  |     | <i>NKX2-2</i>    | Body    |
| cg16530177 | 6  | 6,320,324   | 0.003697 | 0.318 | 0.267 |  |  |  |     | <i>F13A1</i>     | 5'UTR   |
| cg17204129 | 7  | 117,119,601 | 3.47E-08 | 0.318 | 0.312 |  |  |  |     | <i>CFTR</i>      | TSS1500 |
| cg08380379 | 2  | 201,652,352 | 1.23E-14 | 0.318 | 0.299 |  |  |  |     | <i>AOX2P</i>     | Body    |
| cg12516359 | 11 | 17,717,280  | 0.004407 | 0.318 | 0.405 |  |  |  |     |                  |         |
| cg17871993 | 7  | 65,673,056  | 3.44E-12 | 0.318 | 0.316 |  |  |  |     | <i>TPST1</i>     | 5'UTR   |

|            |    |             |          |       |       |          |       |  |                     |         |
|------------|----|-------------|----------|-------|-------|----------|-------|--|---------------------|---------|
| cg23338503 | 5  | 169,064,530 | 0.008057 | 0.318 | 0.319 |          |       |  | <i>DOCK2</i>        | Body    |
| cg08151731 | 15 | 48,938,576  | 9.07E-10 | 0.318 | 0.247 |          |       |  | <i>FBN1</i>         | TSS1500 |
| cg17173663 | 12 | 115,135,859 | 2.39E-09 | 0.318 | 0.287 |          |       |  |                     |         |
| cg19043574 | 2  | 99,439,533  | 8.97E-08 | 0.318 | 0.339 |          |       |  | <i>C2orf55</i>      | Body    |
| cg26335633 | 7  | 64,029,999  | 8.18E-23 | 0.318 | 0.322 |          |       |  |                     |         |
| cg12648074 | 5  | 140,864,474 | 2.11E-11 | 0.318 | 0.304 |          |       |  | <i>PCDHGA4</i>      | Body    |
| cg00959636 | 6  | 134,499,464 | 0.000765 | 0.318 | 0.323 |          |       |  | <i>SGK1</i>         | Body    |
| cg07862461 | 20 | 1,914,231   | 5.18E-08 | 0.318 | 0.293 |          |       |  | <i>SIRPA</i>        | Body    |
| cg25975621 | 1  | 217,311,177 | 3.44E-05 | 0.318 | 0.295 |          |       |  | <i>ESRRG</i>        | TSS200  |
| cg14186641 | 6  | 88,876,741  | 0.023845 | 0.318 | 0.250 |          |       |  | <i>CNR1</i>         | TSS1500 |
| cg20669834 | 3  | 123,339,417 | 5.29E-08 | 0.318 | 0.317 |          |       |  | <i>MYLK</i>         | 1stExon |
| cg20129082 | 11 | 19,736,150  | 7.66E-05 | 0.318 | 0.322 |          |       |  | <i>LOC100126784</i> | TSS200  |
| cg01094950 | 2  | 43,455,097  | 4.24E-06 | 0.318 | 0.241 |          |       |  | <i>ZFP36L2</i>      | TSS1500 |
| cg07570498 | 1  | 33,813,321  | 1.02E-21 | 0.318 | 0.301 |          |       |  | <i>PHC2</i>         | 5'UTR   |
| cg07674834 | 17 | 8,230,235   | 0.001075 | 0.318 | 0.343 |          |       |  |                     |         |
| cg00467854 | X  | 25,040,358  | 0.000461 | 0.318 | 0.278 |          |       |  |                     |         |
| cg04482110 | 17 | 41,364,121  | 1.51E-09 | 0.318 | 0.306 | 6.36E-25 | 0.169 |  | <i>TMEM106A</i>     | 5'UTR   |
| cg11558551 | 19 | 17,516,442  | 3.49E-08 | 0.318 | 0.298 |          |       |  | <i>BST2</i>         | TSS200  |
| cg21346043 | 8  | 86,351,067  | 3.53E-09 | 0.318 | 0.322 |          |       |  | <i>CA3</i>          | 1stExon |
| cg03699904 | 3  | 170,746,029 | 1.06E-09 | 0.318 | 0.271 | 4.57E-17 | 0.215 |  | <i>SLC2A2</i>       | TSS1500 |
| cg21884231 | 3  | 170,303,721 | 0.002007 | 0.318 | 0.416 |          |       |  | <i>SLC7A14</i>      | 5'UTR   |
| cg02683114 | 2  | 24,398,427  | 1.3E-06  | 0.318 | 0.248 |          |       |  | <i>C2orf84</i>      | Body    |
| cg13914893 | 9  | 137,980,958 | 0.000134 | 0.318 | 0.270 |          |       |  | <i>OLFM1</i>        | Body    |
| cg21899310 | 11 | 57,365,725  | 0.001746 | 0.318 | 0.296 |          |       |  | <i>SERPING1</i>     | 1stExon |
| cg03257179 | 15 | 41,805,946  | 2.18E-08 | 0.318 | 0.310 |          |       |  | <i>LTK</i>          | 1stExon |
| cg08170869 | 6  | 26,188,969  | 0.000207 | 0.318 | 0.312 |          |       |  | <i>HIST1H4D</i>     | 3'UTR   |
| cg11833968 | 6  | 79,620,685  | 9.51E-07 | 0.318 | 0.330 |          |       |  |                     |         |
| cg05729490 | 7  | 27,404,187  | 1.93E-16 | 0.318 | 0.284 |          |       |  |                     |         |
| cg11996592 | 8  | 144,577,094 | 5.99E-26 | 0.318 | 0.311 |          |       |  | <i>ZC3H3</i>        | Body    |
| cg06942445 | X  | 54,947,373  | 0.00081  | 0.318 | 0.435 | 5.15E-27 | 0.258 |  | <i>TRO</i>          | 5'UTR   |
| cg08184792 | 12 | 48,592,270  | 2.13E-05 | 0.318 | 0.324 |          |       |  |                     |         |
| cg07550362 | 7  | 97,361,201  | 6.28E-05 | 0.318 | 0.298 | 1.55E-29 | 0.217 |  | <i>TAC1</i>         | TSS200  |
| cg24544490 | 1  | 155,290,961 | 6.57E-08 | 0.318 | 0.264 |          |       |  | <i>RUSC1</i>        | 5'UTR   |
| cg08362628 | 3  | 54,861,701  | 9.76E-06 | 0.318 | 0.334 |          |       |  | <i>CACNA2D3</i>     | Body    |

|            |    |             |          |       |       |          |       |  |                 |         |
|------------|----|-------------|----------|-------|-------|----------|-------|--|-----------------|---------|
| cg15241084 | X  | 12,886,121  | 2.41E-06 | 0.318 | 0.353 |          |       |  | <i>TLR7</i>     | Body    |
| cg13036352 | 6  | 30,651,825  | 1.78E-09 | 0.318 | 0.329 |          |       |  | <i>KIAA1949</i> | Body    |
| cg10864952 | 7  | 65,671,987  | 5.74E-11 | 0.317 | 0.328 |          |       |  | <i>TPST1</i>    | 5'UTR   |
| cg19728226 | 2  | 176,968,744 | 1.14E-05 | 0.317 | 0.312 |          |       |  |                 |         |
| cg15081566 | 11 | 111,169,865 | 0.00861  | 0.317 | 0.365 |          |       |  | <i>C11orf92</i> | 5'UTR   |
| cg00578638 | 17 | 38,334,161  | 1.13E-08 | 0.317 | 0.272 |          |       |  | <i>RAPGEFL1</i> | TSS200  |
| cg15052747 | 9  | 138,942,591 | 1.48E-11 | 0.317 | 0.301 |          |       |  | <i>NACC2</i>    | 5'UTR   |
| cg09645574 | 6  | 42,879,382  | 6.83E-07 | 0.317 | 0.320 |          |       |  |                 |         |
| cg11508595 | 2  | 192,135,315 | 2.96E-15 | 0.317 | 0.313 |          |       |  | <i>MYO1B</i>    | 5'UTR   |
| cg15920906 | 12 | 111,619,414 | 9.46E-08 | 0.317 | 0.277 |          |       |  | <i>CUX2</i>     | Body    |
| cg16732616 | 1  | 50,886,782  | 0.004738 | 0.317 | 0.337 |          |       |  | <i>DMRTA2</i>   | Body    |
| cg17284804 | 1  | 67,218,135  | 1.59E-06 | 0.317 | 0.333 |          |       |  | <i>TCTEX1D1</i> | TSS200  |
| cg03951374 | 15 | 37,390,176  | 5.21E-06 | 0.317 | 0.368 |          |       |  | <i>MEIS2</i>    | 1stExon |
| cg21737444 | 22 | 38,071,591  | 7.47E-09 | 0.317 | 0.291 |          |       |  | <i>LGALS1</i>   | TSS200  |
| cg03932723 | 11 | 63,258,523  | 0.000159 | 0.317 | 0.272 |          |       |  | <i>HRASLS5</i>  | 1stExon |
| cg10881128 | 1  | 44,031,826  | 4.23E-07 | 0.317 | 0.326 |          |       |  | <i>PTPRF</i>    | Body    |
| cg23160016 | 4  | 46,391,929  | 1.95E-05 | 0.317 | 0.298 |          |       |  | <i>GABRA2</i>   | TSS1500 |
| cg08935118 | 15 | 35,014,229  | 7.12E-07 | 0.317 | 0.322 |          |       |  |                 |         |
| cg04923020 | 12 | 46,005,007  | 1.97E-18 | 0.317 | 0.320 |          |       |  |                 |         |
| cg19660812 | 8  | 38,617,447  | 1.15E-08 | 0.317 | 0.315 |          |       |  | <i>TACC1</i>    | 5'UTR   |
| cg03872783 | 21 | 26,934,885  | 0.001211 | 0.317 | 0.259 |          |       |  | <i>MIR155HG</i> | Body    |
| cg10811474 | 19 | 8,428,787   | 0.009318 | 0.317 | 0.236 |          |       |  | <i>ANGPTL4</i>  | TSS1500 |
| cg07803375 | 7  | 811,206     | 3.84E-05 | 0.317 | 0.316 |          |       |  | <i>HEATR2</i>   | Body    |
| cg26290543 | 11 | 45,377,324  | 1.42E-13 | 0.317 | 0.335 |          |       |  |                 |         |
| cg18272353 | 14 | 95,238,706  | 0.000391 | 0.317 | 0.314 |          |       |  |                 |         |
| cg12866112 | 7  | 157,372,332 | 7.04E-24 | 0.317 | 0.323 |          |       |  | <i>PTPRN2</i>   | Body    |
| cg15198094 | 1  | 200,003,342 | 3.4E-10  | 0.317 | 0.301 |          |       |  | <i>NR5A2</i>    | Body    |
| cg15549973 | 1  | 159,823,687 | 2.38E-05 | 0.317 | 0.255 |          |       |  | <i>C1orf204</i> | Body    |
| cg09752627 | 4  | 25,657,160  | 0.008319 | 0.317 | 0.210 |          |       |  | <i>SLC34A2</i>  | TSS1500 |
| cg00079219 | 12 | 54,360,131  | 3.47E-06 | 0.317 | 0.253 |          |       |  | <i>HOTAIR</i>   | Body    |
| cg06148264 | 6  | 2,841,468   | 1.15E-08 | 0.317 | 0.284 | 1.01E-21 | 0.186 |  | <i>SERPINB1</i> | 5'UTR   |
| cg12360736 | 3  | 151,985,869 | 1.15E-08 | 0.317 | 0.273 | 2.37E-21 | 0.171 |  | <i>MBNL1</i>    | 1stExon |
| cg12956688 | 19 | 18,415,646  | 2.47E-15 | 0.317 | 0.318 |          |       |  |                 |         |
| cg22336806 | 6  | 2,903,704   | 7.87E-08 | 0.317 | 0.274 |          |       |  | <i>SERPINB9</i> | TSS200  |

|            |    |             |          |       |       |          |       |  |         |         |
|------------|----|-------------|----------|-------|-------|----------|-------|--|---------|---------|
| cg01841641 | 2  | 223,169,965 | 0.004364 | 0.317 | 0.426 |          |       |  |         |         |
| cg22982811 | 7  | 28,032,986  | 4.01E-08 | 0.317 | 0.304 |          |       |  | JAZF1   | Body    |
| cg07149609 | 1  | 170,630,734 | 1.55E-08 | 0.317 | 0.322 |          |       |  |         |         |
| cg26465391 | 19 | 58,220,773  | 9.42E-07 | 0.317 | 0.266 |          |       |  | ZNF154  | TSS200  |
| cg27168780 | 6  | 28,521,796  | 4.85E-05 | 0.317 | 0.302 |          |       |  |         |         |
| cg00057231 | 3  | 48,631,958  | 1.91E-13 | 0.317 | 0.278 |          |       |  | COL7A1  | Body    |
| cg00089814 | 3  | 72,641,008  | 9.35E-12 | 0.317 | 0.312 |          |       |  |         |         |
| cg06312813 | 4  | 74,964,493  | 3.31E-07 | 0.317 | 0.309 |          |       |  | CXCL2   | Body    |
| cg14021375 | 19 | 16,999,800  | 1.24E-09 | 0.317 | 0.283 |          |       |  | F2RL3   | TSS200  |
| cg03434384 | 12 | 27,703,097  | 3.94E-25 | 0.317 | 0.313 |          |       |  | PPFIBP1 | 5'UTR   |
| cg17138769 | 10 | 118,892,211 | 0.006807 | 0.317 | 0.393 |          |       |  | VAX1    | Body    |
| cg19268119 | 2  | 225,266,880 | 0.02429  | 0.317 | 0.341 |          |       |  | FAM124B | TSS200  |
| cg17606785 | 14 | 23,834,808  | 1.47E-09 | 0.317 | 0.287 | 8.11E-33 | 0.229 |  | EFS     | 1stExon |
| cg17773502 | X  | 41,302,010  | 6.44E-08 | 0.317 | 0.210 |          |       |  |         |         |
| cg04993975 | 17 | 35,294,472  | 0.016022 | 0.317 | 0.340 |          |       |  | LHX1    | TSS200  |
| cg02553486 | 4  | 47,840,095  | 1.49E-10 | 0.317 | 0.295 | 2.03E-12 | 0.169 |  | CORIN   | TSS200  |
| cg02990291 | 7  | 96,625,586  | 0.00026  | 0.317 | 0.345 |          |       |  | DLX6AS  | Body    |
| cg01370541 | 4  | 41,882,812  | 6.6E-05  | 0.317 | 0.290 |          |       |  |         |         |
| cg09313745 | 12 | 3,373,666   | 8E-10    | 0.317 | 0.277 |          |       |  | TSPAN9  | Body    |
| cg03329165 | 3  | 112,052,218 | 0.000183 | 0.317 | 0.415 | 6.7E-12  | 0.154 |  | CD200   | Body    |
| cg12118269 | 10 | 102,893,980 | 6.48E-05 | 0.317 | 0.294 |          |       |  | TLX1    | Body    |
| cg10242496 | 6  | 137,242,316 | 4.91E-06 | 0.317 | 0.326 |          |       |  | SLC35D3 | TSS1500 |
| cg13267264 | 8  | 70,983,600  | 0.014871 | 0.317 | 0.421 |          |       |  | PRDM14  | TSS200  |
| cg03276022 | 11 | 117,069,900 | 9.63E-13 | 0.317 | 0.317 |          |       |  | TAGLN   | TSS200  |
| cg20742009 | 3  | 182,879,817 | 0.00027  | 0.317 | 0.166 |          |       |  | LAMP3   | Body    |
| cg27603796 | 7  | 117,512,803 | 0.000236 | 0.317 | 0.358 | 1.62E-23 | 0.224 |  | CTTNBP2 | Body    |
| cg20943084 | 5  | 140,012,769 | 0.002527 | 0.317 | 0.359 |          |       |  | CD14    | 1stExon |
| cg03559682 | 11 | 6,439,864   | 0.000266 | 0.316 | 0.133 |          |       |  | APBB1   | 5'UTR   |
| cg24710320 | 3  | 192,958,832 | 0.013183 | 0.316 | 0.192 |          |       |  | MGC2889 | TSS1500 |
| cg26343883 | 2  | 164,205,032 | 1.09E-05 | 0.316 | 0.254 |          |       |  |         |         |
| cg06355129 | 1  | 156,646,293 | 4.29E-07 | 0.316 | 0.343 |          |       |  | NES     | 1stExon |
| cg17357479 | 1  | 184,005,717 | 0.000138 | 0.316 | 0.222 |          |       |  | GLT25D2 | Body    |
| cg03362215 | 6  | 78,176,806  | 0.00042  | 0.316 | 0.314 |          |       |  |         |         |
| cg17291136 | 8  | 26,087,851  | 1.43E-18 | 0.316 | 0.308 |          |       |  |         |         |

|            |    |             |          |       |       |  |  |  |                  |         |
|------------|----|-------------|----------|-------|-------|--|--|--|------------------|---------|
| cg05319305 | 4  | 101,111,927 | 9.24E-08 | 0.316 | 0.271 |  |  |  | <i>DDIT4L</i>    | TSS1500 |
| cg00966099 | 4  | 184,718,401 | 4.55E-05 | 0.316 | 0.327 |  |  |  |                  |         |
| cg06650847 | X  | 63,004,884  | 0.003827 | 0.316 | 0.359 |  |  |  |                  |         |
| cg10800833 | 4  | 57,521,657  | 0.027286 | 0.316 | 0.165 |  |  |  | <i>HOPX</i>      | Body    |
| cg23982858 | 12 | 95,941,869  | 5.09E-06 | 0.316 | 0.252 |  |  |  | <i>USP44</i>     | 5'UTR   |
| cg04192867 | 10 | 93,647,053  | 1.29E-06 | 0.316 | 0.288 |  |  |  |                  |         |
| cg21202716 | 11 | 70,508,022  | 7.28E-07 | 0.316 | 0.302 |  |  |  | <i>SHANK2</i>    | Body    |
| cg13787982 | 19 | 20,348,926  | 0.017849 | 0.316 | 0.158 |  |  |  |                  |         |
| cg02956248 | 6  | 32,120,901  | 2.24E-13 | 0.316 | 0.325 |  |  |  | <i>PPT2</i>      | TSS1500 |
| cg05227549 | 12 | 1,770,782   | 0.010353 | 0.316 | 0.229 |  |  |  |                  |         |
| cg07017597 | 15 | 32,983,650  | 1.19E-12 | 0.316 | 0.308 |  |  |  | <i>SCG5</i>      | Body    |
| cg08832603 | 7  | 96,652,481  | 3.98E-07 | 0.316 | 0.304 |  |  |  | <i>DLX5</i>      | Body    |
| cg16476975 | 7  | 155,164,995 | 0.000179 | 0.316 | 0.296 |  |  |  |                  |         |
| cg13974773 | 6  | 27,463,217  | 0.001248 | 0.316 | 0.367 |  |  |  |                  |         |
| cg07749485 | X  | 119,124,509 | 0.001226 | 0.316 | 0.393 |  |  |  |                  |         |
| cg16158863 | 13 | 32,605,218  | 0.002246 | 0.316 | 0.149 |  |  |  | <i>FRY</i>       | TSS1500 |
| cg24212268 | 10 | 29,936,149  | 1.12E-08 | 0.316 | 0.259 |  |  |  | <i>SVIL</i>      | 5'UTR   |
| cg24188415 | 10 | 119,304,586 | 0.039151 | 0.316 | 0.316 |  |  |  | <i>EMX2</i>      | Body    |
| cg08481491 | 3  | 125,900,108 | 2.3E-15  | 0.316 | 0.262 |  |  |  | <i>ALDH1L1</i>   | TSS1500 |
| cg18008019 | 13 | 100,641,646 | 9.46E-12 | 0.316 | 0.287 |  |  |  |                  |         |
| cg13639936 | 9  | 102,586,628 | 0.001775 | 0.316 | 0.205 |  |  |  | <i>NR4A3</i>     | 5'UTR   |
| cg20215007 | 7  | 149,468,365 | 2.05E-27 | 0.316 | 0.298 |  |  |  | <i>ZNF467</i>    | 5'UTR   |
| cg25663755 | 3  | 38,035,463  | 6.79E-05 | 0.316 | 0.198 |  |  |  | <i>VILL</i>      | Body    |
| cg00545705 | 1  | 208,382,186 | 5.19E-22 | 0.316 | 0.275 |  |  |  | <i>PLXNA2</i>    | Body    |
| cg17621718 | 3  | 42,306,737  | 1.97E-05 | 0.316 | 0.314 |  |  |  | <i>CCK</i>       | TSS1500 |
| cg05097861 | 17 | 15,820,610  | 4.48E-18 | 0.316 | 0.294 |  |  |  |                  |         |
| cg08350776 | 5  | 54,516,538  | 4.68E-09 | 0.316 | 0.297 |  |  |  |                  |         |
| cg25035631 | 1  | 35,586,358  | 1.22E-07 | 0.316 | 0.324 |  |  |  |                  |         |
| cg08298946 | 12 | 13,301,010  | 9.26E-06 | 0.316 | 0.237 |  |  |  |                  |         |
| cg21443699 | 7  | 142,637,936 | 3.96E-17 | 0.316 | 0.307 |  |  |  | <i>C7orf34</i>   | 3'UTR   |
| cg02921269 | 14 | 75,894,323  | 0.025772 | 0.316 | 0.118 |  |  |  | <i>JDP2</i>      | TSS200  |
| cg23684878 | 12 | 65,218,260  | 0.031682 | 0.316 | 0.078 |  |  |  |                  |         |
| cg12457909 | 7  | 39,649,359  | 1.73E-06 | 0.316 | 0.247 |  |  |  | <i>LOC646999</i> | Body    |
| cg08178940 | 6  | 50,808,627  | 1.65E-08 | 0.316 | 0.330 |  |  |  | <i>TFAP2B</i>    | Body    |



|            |    |             |          |       |       |          |       |  |                  |         |
|------------|----|-------------|----------|-------|-------|----------|-------|--|------------------|---------|
| cg00772407 | 12 | 89,744,471  | 3.15E-06 | 0.316 | 0.282 |          |       |  | <i>DUSP6</i>     | Body    |
| cg00788028 | 2  | 114,049,041 | 1.95E-16 | 0.316 | 0.312 |          |       |  | <i>LOC440839</i> | Body    |
| cg08091439 | 1  | 110,546,703 | 2.82E-24 | 0.316 | 0.323 |          |       |  | <i>AHCYL1</i>    | Body    |
| cg14243778 | 12 | 41,086,879  | 9.25E-07 | 0.316 | 0.334 |          |       |  | <i>CNTN1</i>     | 5'UTR   |
| cg24550010 | 1  | 65,731,107  | 7.37E-09 | 0.316 | 0.280 |          |       |  | <i>DNAJC6</i>    | Body    |
| cg04926881 | 7  | 29,024,378  | 2.67E-06 | 0.316 | 0.345 |          |       |  |                  |         |
| cg05635754 | 19 | 17,958,736  | 4.56E-06 | 0.316 | 0.279 |          |       |  | <i>JAK3</i>      | 5'UTR   |
| cg01101344 | 16 | 1,973,654   | 0.000366 | 0.315 | 0.288 |          |       |  |                  |         |
| cg06132069 | 20 | 44,686,038  | 4.95E-09 | 0.315 | 0.299 |          |       |  | <i>SLC12A5</i>   | Body    |
| cg05602356 | 5  | 58,334,856  | 1.06E-15 | 0.315 | 0.308 |          |       |  | <i>PDE4D</i>     | Body    |
| cg05587394 | 2  | 23,777,246  | 1.21E-19 | 0.315 | 0.318 |          |       |  | <i>KLHL29</i>    | 5'UTR   |
| cg25769732 | 1  | 92,295,946  | 4.11E-07 | 0.315 | 0.288 |          |       |  | <i>TGFBR3</i>    | Body    |
| cg02453462 | 15 | 73,662,002  | 4.21E-05 | 0.315 | 0.374 |          |       |  | <i>HCN4</i>      | TSS1500 |
| cg02721000 | 12 | 54,441,213  | 4.98E-08 | 0.315 | 0.280 |          |       |  | <i>HOXC4</i>     | 5'UTR   |
| cg15676455 | 3  | 128,564,943 | 0.000124 | 0.315 | 0.282 |          |       |  |                  |         |
| cg03478249 | 13 | 43,566,547  | 0.000186 | 0.315 | 0.309 |          |       |  | <i>EPSTI1</i>    | TSS200  |
| cg26474043 | 5  | 148,442,857 | 2.12E-17 | 0.315 | 0.311 |          |       |  | <i>SH3TC2</i>    | TSS200  |
| cg10322504 | 20 | 3,229,239   | 1.26E-09 | 0.315 | 0.301 |          |       |  |                  |         |
| cg02986266 | 7  | 20,833,552  | 0.01896  | 0.315 | 0.353 |          |       |  |                  |         |
| cg06183338 | 5  | 178,004,204 | 1.03E-11 | 0.315 | 0.324 |          |       |  | <i>COL23A1</i>   | Body    |
| cg02058358 | 14 | 76,819,107  | 1.07E-10 | 0.315 | 0.225 |          |       |  |                  |         |
| cg25927215 | 6  | 34,677,450  | 1.59E-16 | 0.315 | 0.324 |          |       |  |                  |         |
| cg11154552 | 7  | 87,848,242  | 0.005669 | 0.315 | 0.260 |          |       |  | <i>SRI</i>       | Body    |
| cg20233073 | 4  | 54,960,226  | 1.03E-12 | 0.315 | 0.285 |          |       |  |                  |         |
| cg03400828 | 6  | 44,310,324  | 2.92E-05 | 0.315 | 0.365 |          |       |  | <i>SPATS1</i>    | TSS200  |
| cg06796713 | 2  | 66,664,871  | 0.001663 | 0.315 | 0.389 |          |       |  | <i>MEIS1</i>     | Body    |
| cg14663984 | 1  | 969,042     | 0.000729 | 0.315 | 0.260 |          |       |  | <i>AGRN</i>      | Body    |
| cg03738247 | X  | 119,134,526 | 1.46E-06 | 0.315 | 0.277 |          |       |  |                  |         |
| cg04588840 | 20 | 2,781,685   | 2.05E-05 | 0.315 | 0.234 |          |       |  | <i>CPXM1</i>     | TSS1500 |
| cg16835233 | 22 | 22,862,479  | 3.02E-09 | 0.315 | 0.197 |          |       |  | <i>ZNF280B</i>   | 5'UTR   |
| cg25747192 | 3  | 50,378,423  | 1.01E-06 | 0.315 | 0.311 |          |       |  | <i>RASSF1</i>    | TSS200  |
| cg21039708 | 14 | 57,278,729  | 0.027461 | 0.315 | 0.368 |          |       |  | <i>OTX2OS1</i>   | TSS1500 |
| cg25832771 | 8  | 72,756,058  | 0.001059 | 0.315 | 0.365 |          |       |  | <i>MSC</i>       | 1stExon |
| cg01888601 | 11 | 47,736,182  | 1.14E-11 | 0.315 | 0.261 | 3.03E-27 | 0.195 |  | <i>AGBL2</i>     | 1stExon |

|            |    |             |          |       |       |          |       |  |                  |         |
|------------|----|-------------|----------|-------|-------|----------|-------|--|------------------|---------|
| cg06714180 | 12 | 54,409,525  | 0.001098 | 0.315 | 0.313 |          |       |  | <i>HOXC4</i>     | TSS1500 |
| cg18145505 | 15 | 33,009,498  | 0.000838 | 0.315 | 0.269 | 2.53E-24 | 0.300 |  | <i>GREM1</i>     | TSS1500 |
| cg19843891 | 8  | 48,675,647  | 3.18E-06 | 0.315 | 0.257 |          |       |  |                  |         |
| cg11827910 | 11 | 31,825,756  | 0.017518 | 0.315 | 0.277 |          |       |  | <i>PAX6</i>      | Body    |
| cg25971727 | 12 | 81,471,533  | 1.87E-05 | 0.315 | 0.304 |          |       |  | <i>ACSS3</i>     | TSS1500 |
| cg08662017 | 11 | 12,031,093  | 0.000346 | 0.315 | 0.279 |          |       |  | <i>DKK3</i>      | TSS1500 |
| cg05901357 | 2  | 27,529,325  | 4.03E-17 | 0.315 | 0.298 |          |       |  | <i>TRIM54</i>    | Body    |
| cg08472142 | 1  | 155,007,166 | 1.01E-07 | 0.315 | 0.244 |          |       |  | <i>DCST1</i>     | Body    |
| cg06736785 | 7  | 132,260,175 | 5.23E-12 | 0.315 | 0.268 |          |       |  | <i>PLXNA4</i>    | 5'UTR   |
| cg05143887 | 12 | 81,471,938  | 0.0102   | 0.315 | 0.337 |          |       |  | <i>ACSS3</i>     | 1stExon |
| cg02305765 | 12 | 53,107,910  | 5.78E-22 | 0.315 | 0.258 |          |       |  |                  |         |
| cg05847960 | 20 | 10,152,774  | 0.020498 | 0.315 | 0.163 |          |       |  |                  |         |
| cg08278108 | 17 | 48,042,917  | 1.62E-11 | 0.315 | 0.321 |          |       |  |                  |         |
| cg09969043 | 15 | 96,868,971  | 5.54E-07 | 0.315 | 0.258 |          |       |  | <i>NR2F2</i>     | TSS200  |
| cg10332649 | 2  | 149,932,635 | 5.81E-15 | 0.315 | 0.306 |          |       |  | <i>LYPD6B</i>    | 5'UTR   |
| cg14360865 | 18 | 59,560,371  | 4.96E-08 | 0.315 | 0.250 |          |       |  | <i>RNF152</i>    | TSS200  |
| cg18809126 | 3  | 11,623,526  | 8.36E-07 | 0.315 | 0.272 |          |       |  | <i>VGLL4</i>     | Body    |
| cg06087421 | 1  | 47,695,138  | 0.002252 | 0.315 | 0.336 |          |       |  | <i>TAL1</i>      | 5'UTR   |
| cg06673178 | X  | 50,557,022  | 0.027205 | 0.315 | 0.392 |          |       |  | <i>SHROOM4</i>   | 5'UTR   |
| cg07201456 | 16 | 75,528,813  | 0.005301 | 0.315 | 0.292 |          |       |  | <i>CHST6</i>     | 5'UTR   |
| cg21480420 | X  | 119,445,407 | 1.34E-15 | 0.315 | 0.314 |          |       |  | <i>FAM70A</i>    | TSS200  |
| cg06127885 | 15 | 45,421,068  | 7.6E-26  | 0.315 | 0.314 |          |       |  | <i>DUOX1</i>     | TSS1500 |
| cg03891590 | 10 | 21,814,313  | 1.17E-17 | 0.315 | 0.268 |          |       |  | <i>C10orf140</i> | 5'UTR   |
| cg24030507 | 5  | 139,089,274 | 5.03E-05 | 0.315 | 0.342 |          |       |  |                  |         |
| cg02388150 | 8  | 41,165,699  | 0.000427 | 0.315 | 0.160 | 1.39E-14 | 0.184 |  | <i>SFRP1</i>     | Body    |
| cg26613811 | 7  | 150,054,588 | 3.37E-19 | 0.315 | 0.301 |          |       |  |                  |         |
| cg01110759 | 16 | 56,672,387  | 2.25E-07 | 0.315 | 0.296 |          |       |  | <i>MT1A</i>      | TSS200  |
| cg09076334 | 13 | 24,477,870  | 1.95E-10 | 0.315 | 0.331 |          |       |  |                  |         |
| cg06815411 | 4  | 57,737,651  | 6.49E-11 | 0.315 | 0.325 |          |       |  |                  |         |
| cg16407699 | 10 | 74,020,428  | 2.77E-12 | 0.315 | 0.304 |          |       |  |                  |         |
| cg21593030 | 11 | 70,952,175  | 0.001458 | 0.315 | 0.304 |          |       |  |                  |         |
| cg22395765 | 7  | 157,362,094 | 6.1E-18  | 0.315 | 0.317 |          |       |  | <i>PTPRN2</i>    | Body    |
| cg16440629 | 17 | 44,896,147  | 3.46E-07 | 0.315 | 0.336 |          |       |  | <i>WNT3</i>      | TSS200  |
| cg17616554 | 7  | 117,119,611 | 7.72E-07 | 0.315 | 0.303 |          |       |  | <i>CFTR</i>      | TSS1500 |

|            |    |             |          |       |       |  |  |  |                     |         |
|------------|----|-------------|----------|-------|-------|--|--|--|---------------------|---------|
| cg12975230 | 18 | 73,167,671  | 0.01319  | 0.315 | 0.096 |  |  |  |                     |         |
| cg07189401 | 11 | 19,736,333  | 2.66E-06 | 0.315 | 0.309 |  |  |  | <i>LOC100126784</i> | TSS200  |
| cg08690459 | 11 | 47,279,586  | 6.52E-23 | 0.315 | 0.299 |  |  |  | <i>NR1H3</i>        | 1stExon |
| cg06320380 | 2  | 218,770,208 | 3.2E-16  | 0.315 | 0.307 |  |  |  | <i>TNS1</i>         | 5'UTR   |
| cg21679391 | 1  | 1,286,917   | 2.27E-27 | 0.315 | 0.288 |  |  |  |                     |         |
| cg07841815 | 7  | 100,318,223 | 0.001083 | 0.315 | 0.196 |  |  |  | <i>EPO</i>          | TSS200  |
| cg13398947 | 6  | 30,418,494  | 2.34E-07 | 0.315 | 0.295 |  |  |  |                     |         |
| cg27347290 | 6  | 31,831,439  | 2.68E-06 | 0.315 | 0.301 |  |  |  | <i>NEU1</i>         | TSS1500 |
| cg09292244 | 8  | 8,182,618   | 9.47E-20 | 0.315 | 0.304 |  |  |  | <i>PRAGMIN</i>      | Body    |
| cg13036381 | 3  | 159,942,495 | 8.13E-07 | 0.315 | 0.280 |  |  |  | <i>LOC401097</i>    | TSS1500 |
| cg20930202 | 6  | 139,613,456 | 7.75E-10 | 0.315 | 0.328 |  |  |  | <i>TXLNB</i>        | TSS1500 |
| cg00956964 | 18 | 12,420,862  | 2.75E-13 | 0.315 | 0.266 |  |  |  | <i>SLMO1</i>        | Body    |
| cg19744936 | 19 | 15,343,395  | 0.001771 | 0.315 | 0.349 |  |  |  | <i>EPHX3</i>        | 5'UTR   |
| cg19623012 | 11 | 116,371,330 | 0.000974 | 0.315 | 0.275 |  |  |  |                     |         |
| cg22884656 | 2  | 45,157,296  | 0.001221 | 0.315 | 0.318 |  |  |  |                     |         |
| cg17012202 | 6  | 31,830,656  | 0.042954 | 0.315 | 0.285 |  |  |  | <i>NEU1</i>         | 5'UTR   |
| cg05741937 | 12 | 104,609,797 | 3.81E-07 | 0.315 | 0.314 |  |  |  | <i>TXNRD1</i>       | Body    |
| cg16065922 | 7  | 71,912,239  | 0.000143 | 0.315 | 0.370 |  |  |  |                     |         |
| cg18427787 | 20 | 45,087,990  | 0.00341  | 0.315 | 0.132 |  |  |  |                     |         |
| cg11601252 | 15 | 68,122,139  | 0.006896 | 0.314 | 0.315 |  |  |  | <i>LBXCOR1</i>      | Body    |
| cg25129414 | X  | 152,848,639 | 1.89E-19 | 0.314 | 0.308 |  |  |  |                     |         |
| cg06644669 | 6  | 30,653,799  | 8.98E-10 | 0.314 | 0.317 |  |  |  | <i>KIAA1949</i>     | 5'UTR   |
| cg13611347 | 18 | 31,739,207  | 0.018418 | 0.314 | 0.382 |  |  |  | <i>NOL4</i>         | Body    |
| cg06511330 | 1  | 234,635,574 | 2.6E-19  | 0.314 | 0.293 |  |  |  |                     |         |
| cg15298059 | 7  | 157,668,141 | 5.02E-09 | 0.314 | 0.243 |  |  |  | <i>PTPRN2</i>       | Body    |
| cg17175208 | 1  | 6,241,179   | 0.000276 | 0.314 | 0.222 |  |  |  | <i>CHD5</i>         | TSS1500 |
| cg14009098 | 1  | 234,041,306 | 3.59E-08 | 0.314 | 0.278 |  |  |  | <i>SLC35F3</i>      | Body    |
| cg08161323 | 4  | 74,734,762  | 0.000538 | 0.314 | 0.222 |  |  |  | <i>CXCL1</i>        | TSS1500 |
| cg17406248 | 9  | 97,807,693  | 9.57E-16 | 0.314 | 0.300 |  |  |  | <i>C9orf3</i>       | Body    |
| cg16281276 | 11 | 7,695,528   | 0.001463 | 0.314 | 0.251 |  |  |  | <i>CYB5R2</i>       | TSS1500 |
| cg18135771 | 3  | 13,323,959  | 6.8E-06  | 0.314 | 0.348 |  |  |  |                     |         |
| cg06890747 | 7  | 39,649,290  | 0.000605 | 0.314 | 0.276 |  |  |  | <i>LOC646999</i>    | Body    |
| cg09715059 | 6  | 32,223,336  | 6.76E-08 | 0.314 | 0.308 |  |  |  |                     |         |
| cg13651833 | 9  | 71,788,748  | 1.69E-19 | 0.314 | 0.325 |  |  |  | <i>TJP2</i>         | TSS1500 |

|            |    |             |          |       |       |          |       |  |                  |         |
|------------|----|-------------|----------|-------|-------|----------|-------|--|------------------|---------|
| cg19873536 | 10 | 116,475,283 | 1.74E-17 | 0.314 | 0.277 |          |       |  |                  |         |
| cg20288341 | 6  | 31,683,131  | 6.99E-20 | 0.314 | 0.300 |          |       |  | <i>LY6G6E</i>    | TSS1500 |
| cg12841929 | X  | 50,557,522  | 1.12E-06 | 0.314 | 0.310 |          |       |  | <i>SHROOM4</i>   | TSS1500 |
| cg08351336 | 5  | 71,014,820  | 2.55E-07 | 0.314 | 0.276 |          |       |  | <i>CARTPT</i>    | TSS200  |
| cg08571859 | 5  | 112,073,350 | 0.005412 | 0.314 | 0.145 |          |       |  | <i>APC</i>       | TSS1500 |
| cg24006126 | 1  | 155,290,813 | 1.19E-07 | 0.314 | 0.275 |          |       |  | <i>RUSC1</i>     | 5'UTR   |
| cg14661148 | 5  | 71,852,862  | 0.018578 | 0.314 | 0.237 |          |       |  |                  |         |
| cg15068733 | 17 | 7,342,846   | 1.19E-06 | 0.314 | 0.189 | 2.9E-11  | 0.150 |  | <i>FGF11</i>     | 1stExon |
| cg16854986 | 4  | 77,872,417  | 0.038517 | 0.314 | 0.096 |          |       |  | <i>SEPT11</i>    | Body    |
| cg13186286 | 14 | 91,580,451  | 0.012713 | 0.314 | 0.142 |          |       |  | <i>C14orf159</i> | 1stExon |
| cg21462428 | 12 | 4,381,448   | 0.000211 | 0.314 | 0.306 |          |       |  | <i>CCND2</i>     | TSS1500 |
| cg21251140 | 2  | 181,544,642 | 3.15E-06 | 0.314 | 0.255 |          |       |  |                  |         |
| cg16448636 | 7  | 21,209,509  | 1.2E-15  | 0.314 | 0.299 |          |       |  |                  |         |
| cg00301159 | 3  | 157,260,788 | 4.55E-07 | 0.314 | 0.335 |          |       |  | <i>C3orf55</i>   | TSS1500 |
| cg23207676 | 19 | 41,073,603  | 0.004289 | 0.314 | 0.217 |          |       |  | <i>SPTBN4</i>    | Body    |
| cg17282004 | 11 | 47,615,333  | 2.93E-10 | 0.314 | 0.260 |          |       |  | <i>C1QTNF4</i>   | 5'UTR   |
| cg00901051 | 1  | 208,132,490 | 0.000761 | 0.314 | 0.293 |          |       |  |                  |         |
| cg22491548 | 7  | 128,000,861 | 0.002414 | 0.314 | 0.325 |          |       |  | <i>PRRT4</i>     | 5'UTR   |
| cg05490712 | 11 | 31,838,674  | 0.000493 | 0.314 | 0.355 |          |       |  | <i>PAX6</i>      | 5'UTR   |
| cg20024850 | X  | 138,774,368 | 0.026947 | 0.314 | 0.349 |          |       |  | <i>MCF2</i>      | 5'UTR   |
| cg23965061 | 8  | 22,960,599  | 0.005867 | 0.314 | 0.268 |          |       |  | <i>TNFRSF10C</i> | 5'UTR   |
| cg26120958 | 11 | 6,439,806   | 1.2E-06  | 0.314 | 0.188 |          |       |  | <i>APBB1</i>     | 5'UTR   |
| cg07537562 | 7  | 51,539,514  | 5.38E-08 | 0.314 | 0.275 |          |       |  |                  |         |
| cg09340741 | X  | 46,432,858  | 3.91E-05 | 0.314 | 0.308 |          |       |  | <i>CHST7</i>     | TSS1500 |
| cg13768137 | 2  | 177,039,426 | 1.26E-09 | 0.314 | 0.301 |          |       |  |                  |         |
| cg07197059 | 14 | 23,836,012  | 5.51E-15 | 0.314 | 0.314 | 4.76E-23 | 0.172 |  | <i>EFS</i>       | TSS1500 |
| cg11736020 | 6  | 30,651,511  | 2.4E-06  | 0.314 | 0.348 |          |       |  | <i>KIAA1949</i>  | Body    |
| cg23931734 | 15 | 63,673,013  | 2.69E-13 | 0.314 | 0.311 |          |       |  | <i>CA12</i>      | Body    |
| cg17913386 | 3  | 48,632,582  | 0.000188 | 0.314 | 0.309 |          |       |  | <i>COL7A1</i>    | 1stExon |
| cg21929473 | 14 | 51,862,102  | 7E-21    | 0.314 | 0.316 |          |       |  |                  |         |
| cg26830038 | 2  | 219,846,925 | 4.15E-29 | 0.314 | 0.324 |          |       |  | <i>FEV</i>       | Body    |
| cg03607179 | 9  | 139,236,708 | 7.16E-24 | 0.314 | 0.300 |          |       |  | <i>GPSM1</i>     | Body    |
| cg25943118 | 11 | 121,260,362 | 1.53E-12 | 0.314 | 0.321 |          |       |  |                  |         |
| cg20638675 | 10 | 45,374,906  | 0.028467 | 0.314 | 0.176 |          |       |  |                  |         |

|            |    |             |          |       |       |         |       |  |                |         |
|------------|----|-------------|----------|-------|-------|---------|-------|--|----------------|---------|
| cg21817737 | 11 | 89,867,704  | 3.95E-05 | 0.314 | 0.386 |         |       |  | <i>NAALAD2</i> | TSS200  |
| cg02017718 | 12 | 54,441,055  | 1.73E-07 | 0.314 | 0.258 |         |       |  | <i>HOXC4</i>   | 5'UTR   |
| cg08313757 | 2  | 97,428,708  | 1.76E-08 | 0.314 | 0.235 |         |       |  | <i>CNNM4</i>   | Body    |
| cg23647143 | X  | 9,432,556   | 0.009625 | 0.314 | 0.296 |         |       |  | <i>TBL1X</i>   | 5'UTR   |
| cg03848381 | 15 | 40,575,645  | 0.000621 | 0.314 | 0.220 |         |       |  |                |         |
| cg05924540 | 4  | 140,200,723 | 0.000366 | 0.314 | 0.253 |         |       |  | <i>C4orf49</i> | Body    |
| cg27305383 | 4  | 57,522,795  | 1.78E-08 | 0.314 | 0.300 |         |       |  | <i>HOPX</i>    | 5'UTR   |
| cg22579265 | 10 | 94,180,383  | 1.19E-06 | 0.314 | 0.250 |         |       |  |                |         |
| cg21708058 | 8  | 38,585,602  | 4.67E-12 | 0.314 | 0.315 |         |       |  | <i>TACC1</i>   | TSS200  |
| cg24505687 | 6  | 33,548,425  | 1.01E-05 | 0.314 | 0.242 |         |       |  | <i>BAK1</i>    | TSS1500 |
| cg02256049 | 11 | 115,531,001 | 1.52E-08 | 0.314 | 0.287 |         |       |  |                |         |
| cg23473396 | X  | 25,041,134  | 0.015795 | 0.313 | 0.331 |         |       |  |                |         |
| cg05360958 | 12 | 15,038,440  | 3.49E-07 | 0.313 | 0.300 |         |       |  | <i>MGP</i>     | Body    |
| cg20657849 | 6  | 28,557,400  | 0.004444 | 0.313 | 0.269 |         |       |  |                |         |
| cg04502985 | 5  | 77,268,452  | 0.000297 | 0.313 | 0.343 |         |       |  |                |         |
| cg05447008 | 6  | 73,331,114  | 0.044984 | 0.313 | 0.400 |         |       |  | <i>KCNQ5</i>   | TSS1500 |
| cg01349903 | 7  | 71,148,142  | 3.19E-07 | 0.313 | 0.270 |         |       |  | <i>WBSCR17</i> | Body    |
| cg21581873 | 1  | 204,329,307 | 2.85E-09 | 0.313 | 0.321 | 5.7E-38 | 0.236 |  | <i>PLEKHA6</i> | TSS1500 |
| cg07041883 | 5  | 76,476,158  | 0.008648 | 0.313 | 0.296 |         |       |  |                |         |
| cg18602913 | 19 | 16,022,934  | 2.28E-06 | 0.313 | 0.274 |         |       |  |                |         |
| cg15661753 | 12 | 49,627,010  | 7.51E-05 | 0.313 | 0.364 |         |       |  |                |         |
| cg23836904 | 2  | 25,599,488  | 0.000146 | 0.313 | 0.232 |         |       |  |                |         |
| cg04285275 | 16 | 31,549,141  | 1.81E-06 | 0.313 | 0.408 |         |       |  |                |         |
| cg00913949 | 1  | 217,311,511 | 2.23E-07 | 0.313 | 0.312 |         |       |  | <i>ESRRG</i>   | TSS1500 |
| cg19610905 | 11 | 61,596,333  | 0.011827 | 0.313 | 0.433 |         |       |  | <i>FADS2</i>   | Body    |
| cg18793215 | 1  | 156,674,685 | 1.71E-10 | 0.313 | 0.262 |         |       |  | <i>CRABP2</i>  | Body    |
| cg02142483 | 16 | 84,560,555  | 3.11E-05 | 0.313 | 0.284 |         |       |  |                |         |
| cg03061435 | 1  | 205,537,833 | 2.19E-07 | 0.313 | 0.245 |         |       |  | <i>MFSD4</i>   | TSS1500 |
| cg25528646 | X  | 151,143,302 | 0.011558 | 0.313 | 0.411 |         |       |  | <i>GABRE</i>   | TSS200  |
| cg10990170 | 6  | 29,974,521  | 1.9E-14  | 0.313 | 0.317 |         |       |  | <i>HLA-J</i>   | Body    |
| cg15031661 | 1  | 240,256,603 | 0.024152 | 0.313 | 0.319 |         |       |  | <i>FMN2</i>    | 1stExon |
| cg16965552 | 1  | 48,937,016  | 6.16E-20 | 0.313 | 0.304 |         |       |  | <i>SPATA6</i>  | Body    |
| cg06825512 | 18 | 10,453,969  | 3.15E-22 | 0.313 | 0.304 |         |       |  | <i>APCDD1</i>  | TSS1500 |
| cg01749753 | 21 | 38,580,812  | 5.64E-09 | 0.313 | 0.245 |         |       |  | <i>DSCR9</i>   | TSS200  |

|            |    |             |          |       |       |            |       |  |                  |         |
|------------|----|-------------|----------|-------|-------|------------|-------|--|------------------|---------|
| cg05854114 | 12 | 77,719,408  | 0.008974 | 0.313 | 0.259 |            |       |  |                  |         |
| cg23723410 | 1  | 59,486,037  | 5.45E-07 | 0.313 | 0.301 |            |       |  |                  |         |
| cg07687766 | 7  | 129,421,353 | 0.007835 | 0.313 | 0.321 |            |       |  |                  |         |
| cg16661628 | 20 | 32,857,227  | 0.000174 | 0.313 | 0.210 |            |       |  |                  |         |
| cg22381068 | 1  | 906,363     | 1.01E-09 | 0.313 | 0.342 |            |       |  | <i>PLEKHN1</i>   | Body    |
| cg02210123 | 14 | 63,670,835  | 0.029977 | 0.313 | 0.143 | 0.00017193 | 0.051 |  | <i>RHOJ</i>      | TSS1500 |
| cg04474049 | 7  | 116,164,533 | 1.94E-09 | 0.313 | 0.228 |            |       |  | <i>CAV1</i>      | TSS1500 |
| cg22450968 | 7  | 156,871,234 | 3E-05    | 0.313 | 0.307 |            |       |  |                  |         |
| cg23586322 | 8  | 121,138,232 | 0.004434 | 0.313 | 0.377 |            |       |  | <i>COL14A1</i>   | 5'UTR   |
| cg06607384 | 14 | 91,579,859  | 6.99E-10 | 0.313 | 0.279 |            |       |  | <i>C14orf159</i> | TSS1500 |
| cg20931973 | 6  | 110,679,832 | 9.26E-07 | 0.313 | 0.190 |            |       |  | <i>C6orf186</i>  | TSS1500 |
| cg21579399 | 2  | 11,890,700  | 8.51E-13 | 0.313 | 0.300 |            |       |  | <i>LPIN1</i>     | 5'UTR   |
| cg01635061 | 6  | 33,160,234  | 5.03E-05 | 0.313 | 0.302 |            |       |  | <i>COL11A2</i>   | 5'UTR   |
| cg23244913 | 6  | 29,943,401  | 1.19E-07 | 0.313 | 0.314 | 9.08E-12   | 0.192 |  | <i>HCG9</i>      | Body    |
| cg08269485 | 11 | 1,769,382   | 0.035268 | 0.313 | 0.199 |            |       |  | <i>HCCA2</i>     | Body    |
| cg12136608 | 3  | 3,840,360   | 0.01881  | 0.313 | 0.074 |            |       |  | <i>LRRN1</i>     | TSS1500 |
| cg10777851 | 3  | 112,051,808 | 0.001039 | 0.313 | 0.424 | 5.02E-19   | 0.138 |  | <i>CD200</i>     | TSS200  |
| cg25340966 | 1  | 119,532,195 | 0.001873 | 0.313 | 0.384 |            |       |  | <i>TBX15</i>     | TSS200  |
| cg17547524 | X  | 117,629,324 | 0.044108 | 0.313 | 0.241 |            |       |  | <i>DOCK11</i>    | TSS1500 |
| cg12439325 | 12 | 51,236,768  | 0.00028  | 0.313 | 0.222 |            |       |  | <i>TMPRSS12</i>  | 1stExon |
| cg02776664 | 19 | 12,978,624  | 0.002585 | 0.313 | 0.349 |            |       |  | <i>MAST1</i>     | Body    |
| cg03443331 | 2  | 97,302,668  | 3.51E-11 | 0.313 | 0.316 |            |       |  | <i>KIAA1310</i>  | Body    |
| cg13939204 | 9  | 130,667,057 | 1.51E-17 | 0.313 | 0.294 |            |       |  |                  |         |
| cg16895261 | 4  | 3,391,305   | 8.77E-21 | 0.313 | 0.316 |            |       |  | <i>RGS12</i>     | Body    |
| cg22876812 | 2  | 71,116,188  | 0.000884 | 0.313 | 0.286 |            |       |  |                  |         |
| cg18704110 | 2  | 73,143,534  | 0.004335 | 0.313 | 0.209 |            |       |  | <i>EMX1</i>      | TSS1500 |
| cg12669543 | 3  | 9,225,565   | 2.96E-15 | 0.313 | 0.298 |            |       |  | <i>SRGAP3</i>    | Body    |
| cg05036846 | 1  | 24,648,984  | 4.11E-12 | 0.313 | 0.335 |            |       |  | <i>GRHL3</i>     | TSS1500 |
| cg12978800 | 7  | 151,403,164 | 3.19E-12 | 0.313 | 0.333 |            |       |  | <i>PRKAG2</i>    | Body    |
| cg07317017 | 15 | 74,218,715  | 1.99E-21 | 0.313 | 0.297 |            |       |  | <i>LOXL1</i>     | TSS200  |
| cg25513433 | 11 | 10,316,555  | 8.07E-09 | 0.313 | 0.235 |            |       |  | <i>SBF2</i>      | TSS1500 |
| cg06679334 | 17 | 35,241,844  | 0.00343  | 0.313 | 0.343 |            |       |  |                  |         |
| cg13668207 | 12 | 65,904,452  | 3.8E-13  | 0.313 | 0.329 |            |       |  |                  |         |
| cg10664112 | 2  | 149,645,559 | 9.24E-06 | 0.313 | 0.298 |            |       |  | <i>KIF5C</i>     | Body    |

|            |    |             |          |       |       |          |       |  |                |         |
|------------|----|-------------|----------|-------|-------|----------|-------|--|----------------|---------|
| cg19679123 | 15 | 67,430,336  | 3.1E-19  | 0.313 | 0.302 |          |       |  | <i>SMAD3</i>   | Body    |
| cg02147764 | 2  | 45,169,681  | 5.04E-08 | 0.313 | 0.317 |          |       |  | <i>SIX3</i>    | 1stExon |
| cg09296957 | 11 | 67,418,310  | 4.78E-13 | 0.313 | 0.312 |          |       |  | <i>ACY3</i>    | TSS200  |
| cg18121066 | 17 | 80,794,274  | 9.4E-05  | 0.313 | 0.307 |          |       |  | <i>TBCD</i>    | Body    |
| cg03026373 | 17 | 36,715,787  | 0.002833 | 0.313 | 0.327 |          |       |  | <i>SRCIN1</i>  | Body    |
| cg25529319 | X  | 154,842,320 | 0.001446 | 0.313 | 0.304 |          |       |  | <i>TMLHE</i>   | 5'UTR   |
| cg04843555 | 5  | 17,360,014  | 1.5E-28  | 0.313 | 0.299 |          |       |  |                |         |
| cg09266771 | 12 | 63,207,138  | 1.77E-18 | 0.313 | 0.310 |          |       |  | <i>PPM1H</i>   | Body    |
| cg03405909 | 11 | 31,845,639  | 0.000346 | 0.313 | 0.259 |          |       |  |                |         |
| cg19756790 | 2  | 45,176,863  | 3.48E-05 | 0.313 | 0.208 |          |       |  |                |         |
| cg10357657 | 19 | 17,958,633  | 1.12E-06 | 0.313 | 0.276 |          |       |  | <i>JAK3</i>    | 5'UTR   |
| cg16585682 | 5  | 180,017,623 | 0.001197 | 0.313 | 0.260 | 1.33E-25 | 0.202 |  | <i>SCGB3A1</i> | Body    |
| cg05949640 | 4  | 2,627,057   | 1.14E-24 | 0.313 | 0.305 |          |       |  | <i>FAM193A</i> | TSS200  |
| cg14167596 | 4  | 4,862,910   | 4.44E-07 | 0.313 | 0.328 | 3.27E-13 | 0.190 |  | <i>MSX1</i>    | Body    |
| cg21264055 | 6  | 30,523,242  | 2.23E-13 | 0.313 | 0.252 | 6.36E-26 | 0.250 |  | <i>GNL1</i>    | Body    |
| cg08892236 | 1  | 21,978,698  | 4.81E-07 | 0.312 | 0.280 |          |       |  | <i>RAP1GAP</i> | 5'UTR   |
| cg15100135 | 17 | 4,891,775   | 6.9E-09  | 0.312 | 0.226 |          |       |  | <i>INCA1</i>   | Body    |
| cg27549944 | 1  | 204,328,843 | 4.03E-22 | 0.312 | 0.295 | 2.39E-25 | 0.160 |  | <i>PLEKHA6</i> | 5'UTR   |
| cg06453916 | 16 | 29,690,524  | 5.44E-15 | 0.312 | 0.331 |          |       |  | <i>QPRT</i>    | 1stExon |
| cg06060835 | 6  | 31,913,809  | 0.000352 | 0.312 | 0.325 |          |       |  | <i>CFB</i>     | 1stExon |
| cg05391318 | 1  | 200,011,684 | 0.023004 | 0.312 | 0.372 |          |       |  | <i>NR5A2</i>   | Body    |
| cg24847366 | 12 | 125,034,283 | 7E-45    | 0.312 | 0.309 |          |       |  |                |         |
| cg00324161 | 3  | 156,009,680 | 7.3E-06  | 0.312 | 0.281 |          |       |  | <i>KCNAB1</i>  | Body    |
| cg20114732 | 6  | 166,579,135 | 1.77E-06 | 0.312 | 0.280 |          |       |  | <i>T</i>       | Body    |
| cg19766441 | 4  | 25,657,365  | 0.005861 | 0.312 | 0.175 |          |       |  | <i>SLC34A2</i> | TSS200  |
| cg21687563 | 22 | 28,838,019  | 2.33E-06 | 0.312 | 0.297 |          |       |  | <i>TTC28</i>   | Body    |
| cg25076459 | 7  | 96,655,889  | 5.3E-10  | 0.312 | 0.263 |          |       |  |                |         |
| cg23255964 | 5  | 138,862,353 | 5.72E-07 | 0.312 | 0.291 |          |       |  | <i>TMEM173</i> | TSS200  |
| cg26073933 | 1  | 156,390,102 | 4.02E-07 | 0.312 | 0.323 |          |       |  | <i>C1orf61</i> | 5'UTR   |
| cg09581551 | 6  | 107,810,162 | 0.000532 | 0.312 | 0.180 |          |       |  | <i>SOBP</i>    | TSS1500 |
| cg04631202 | 1  | 25,942,460  | 0.002073 | 0.312 | 0.198 | 4.66E-24 | 0.209 |  | <i>MAN1C1</i>  | TSS1500 |
| cg23255934 | 2  | 151,025,188 | 3.44E-07 | 0.312 | 0.266 |          |       |  |                |         |
| cg14871601 | 7  | 64,030,039  | 1.15E-08 | 0.312 | 0.320 |          |       |  |                |         |
| cg20014822 | 11 | 69,517,103  | 1.28E-05 | 0.312 | 0.293 |          |       |  | <i>FGF19</i>   | Body    |

|            |    |             |          |       |       |          |       |  |                     |         |
|------------|----|-------------|----------|-------|-------|----------|-------|--|---------------------|---------|
| cg01753263 | 5  | 171,879,957 | 4.6E-17  | 0.312 | 0.312 |          |       |  | <i>SH3PXD2B</i>     | Body    |
| cg09256201 | 2  | 43,019,484  | 8.97E-10 | 0.312 | 0.201 |          |       |  | <i>HAAO</i>         | Body    |
| cg10111629 | 1  | 113,067,124 | 1.44E-24 | 0.312 | 0.296 |          |       |  | <i>ST7L</i>         | 3'UTR   |
| cg23999170 | 1  | 115,628,111 | 4.3E-07  | 0.312 | 0.312 |          |       |  | <i>TSPAN2</i>       | Body    |
| cg21942082 | 5  | 80,690,225  | 3.13E-20 | 0.312 | 0.288 | 9.9E-18  | 0.155 |  | <i>RNU5E</i>        | Body    |
| cg13308137 | 11 | 47,528,955  | 8.24E-18 | 0.312 | 0.294 |          |       |  | <i>CUGBP1</i>       | 5'UTR   |
| cg13945224 | 9  | 98,111,970  | 2.05E-05 | 0.312 | 0.303 |          |       |  |                     |         |
| cg05937737 | 3  | 170,303,540 | 6.32E-11 | 0.312 | 0.301 |          |       |  | <i>SLC7A14</i>      | 5'UTR   |
| cg25127852 | 22 | 50,523,703  | 2.11E-08 | 0.312 | 0.302 |          |       |  | <i>MLC1</i>         | 5'UTR   |
| cg19601636 | 22 | 20,001,066  | 9.16E-19 | 0.312 | 0.295 |          |       |  | <i>ARVCF</i>        | 5'UTR   |
| cg12434571 | 17 | 4,511,132   | 1.15E-07 | 0.312 | 0.265 |          |       |  | <i>SMTNL2</i>       | 3'UTR   |
| cg05486035 | 16 | 56,697,088  | 0.001303 | 0.312 | 0.338 |          |       |  |                     |         |
| cg05994850 | 6  | 30,095,341  | 4.29E-17 | 0.312 | 0.290 |          |       |  |                     |         |
| cg14167389 | 1  | 32,708,250  | 7.36E-23 | 0.312 | 0.305 |          |       |  | <i>MTMR9L</i>       | TSS1500 |
| cg04918175 | 1  | 53,527,424  | 1.68E-16 | 0.312 | 0.281 |          |       |  | <i>PODN</i>         | TSS1500 |
| cg16735495 | 7  | 105,690,812 | 2.86E-15 | 0.312 | 0.299 |          |       |  |                     |         |
| cg02737619 | 1  | 2,222,440   | 2.84E-08 | 0.312 | 0.315 |          |       |  | <i>SKI</i>          | Body    |
| cg23918923 | 7  | 134,144,118 | 0.000174 | 0.312 | 0.175 |          |       |  | <i>AKR1B1</i>       | TSS1500 |
| cg00446414 | 8  | 29,387,350  | 0.000128 | 0.312 | 0.288 |          |       |  |                     |         |
| cg22626659 | 3  | 52,334,181  | 1.16E-08 | 0.312 | 0.275 |          |       |  |                     |         |
| cg11651220 | 1  | 20,512,944  | 1.84E-06 | 0.312 | 0.287 |          |       |  | <i>UBXN10</i>       | 5'UTR   |
| cg14759043 | 12 | 3,862,597   | 0.001348 | 0.312 | 0.225 | 1.43E-11 | 0.129 |  | <i>EFCAB4B</i>      | TSS1500 |
| cg13740187 | 1  | 154,164,699 | 8.7E-09  | 0.312 | 0.313 |          |       |  | <i>TPM3</i>         | TSS200  |
| cg19839655 | 20 | 44,746,499  | 0.00117  | 0.312 | 0.428 |          |       |  | <i>CD40</i>         | TSS1500 |
| cg06242243 | 12 | 124,992,461 | 1.19E-15 | 0.312 | 0.322 |          |       |  | <i>NCOR2</i>        | 5'UTR   |
| cg14176966 | 12 | 2,944,286   | 0.001543 | 0.312 | 0.175 |          |       |  | <i>NRIP2</i>        | TSS200  |
| cg04151062 | 1  | 116,710,943 | 0.000141 | 0.312 | 0.271 |          |       |  |                     |         |
| cg04276508 | 6  | 50,819,054  | 9.99E-07 | 0.312 | 0.309 |          |       |  |                     |         |
| cg12985929 | 17 | 75,370,611  | 5.7E-06  | 0.312 | 0.241 |          |       |  | <i>SEPT9</i>        | 5'UTR   |
| cg19766820 | 5  | 783,220     | 1.37E-08 | 0.312 | 0.296 |          |       |  |                     |         |
| cg09161412 | 17 | 18,057,145  | 0.028263 | 0.312 | 0.240 |          |       |  | <i>MYO15A</i>       | Body    |
| cg01340991 | 6  | 33,397,233  | 5.78E-22 | 0.312 | 0.301 |          |       |  | <i>SYNGAP1</i>      | Body    |
| cg09603829 | 2  | 54,054,349  | 1.67E-14 | 0.312 | 0.303 |          |       |  | <i>LOC100302652</i> | Body    |
| cg08829299 | 11 | 288,305     | 0.00067  | 0.312 | 0.258 |          |       |  | <i>ATHL1</i>        | TSS1500 |



|            |    |             |          |       |       |          |       |     |                   |         |
|------------|----|-------------|----------|-------|-------|----------|-------|-----|-------------------|---------|
| cg09775533 | 20 | 32,857,151  | 0.000118 | 0.312 | 0.210 |          |       |     |                   |         |
| cg04001842 | 15 | 45,406,939  | 1.99E-06 | 0.312 | 0.310 | 5.59E-20 | 0.181 |     | <i>DUOXA2</i>     | 1stExon |
| cg00499837 | 11 | 119,542,542 | 7.5E-18  | 0.312 | 0.291 |          |       |     | <i>PVRL1</i>      | Body    |
| cg18840956 | 5  | 95,769,005  | 0.031877 | 0.312 | 0.271 |          |       |     | <i>PCSK1</i>      | TSS200  |
| cg00537210 | 2  | 23,786,588  | 2.78E-14 | 0.312 | 0.313 |          |       |     | <i>KLHL29</i>     | Body    |
| cg19968840 | 15 | 45,409,319  | 8.22E-09 | 0.312 | 0.316 |          |       |     | <i>DUOXA2</i>     | Body    |
| cg04916091 | 19 | 17,958,647  | 8.63E-05 | 0.312 | 0.274 |          |       |     | <i>JAK3</i>       | 5'UTR   |
| cg03154690 | 5  | 59,188,920  | 1.14E-16 | 0.312 | 0.298 |          |       |     | <i>PDE4D</i>      | Body    |
| cg07090980 | 17 | 873,255     | 8.59E-14 | 0.312 | 0.286 |          |       |     | <i>NXN</i>        | Body    |
| cg19124509 | 4  | 87,281,412  | 3.69E-10 | 0.312 | 0.309 |          |       |     | <i>MAPK10</i>     | TSS200  |
| cg18036081 | 22 | 29,605,147  | 4.19E-23 | 0.311 | 0.279 |          |       |     | <i>EMID1</i>      | Body    |
| cg18390610 | 17 | 48,278,927  | 0.001645 | 0.311 | 0.200 |          |       |     | <i>COL1A1</i>     | 1stExon |
| cg02481934 | 6  | 26,271,193  | 1.78E-08 | 0.311 | 0.306 |          |       |     | <i>HIST1H3G</i>   | 3'UTR   |
| cg05571820 | 4  | 5,709,858   | 0.000558 | 0.311 | 0.241 |          |       |     | <i>EVC2</i>       | 5'UTR   |
| cg25694349 | 12 | 133,065,906 | 0.040325 | 0.311 | 0.311 |          |       |     | <i>FBRSL1</i>     | TSS1500 |
| cg00482488 | 17 | 70,216,332  | 0.000511 | 0.311 | 0.323 |          |       |     |                   |         |
| cg12252090 | 8  | 49,833,279  | 4.6E-07  | 0.311 | 0.327 |          |       |     | <i>SNAI2</i>      | Body    |
| cg21450228 | 3  | 23,727,711  | 2.86E-17 | 0.311 | 0.312 |          |       |     |                   |         |
| cg25587431 | 3  | 177,542,099 | 8.74E-06 | 0.311 | 0.342 |          |       |     |                   |         |
| cg25650256 | 5  | 171,538,557 | 5.24E-08 | 0.311 | 0.295 |          |       |     | <i>STK10</i>      | Body    |
| cg02979711 | 6  | 29,855,338  | 3.27E-22 | 0.311 | 0.287 |          |       |     | <i>HLA-H</i>      | TSS200  |
| cg05636175 | 8  | 22,960,397  | 0.002504 | 0.311 | 0.218 | 6.96E-24 | 0.227 |     | <i>TNFRSF10C</i>  | TSS200  |
| cg13578841 | 15 | 57,719,922  | 7.47E-40 | 0.311 | 0.288 |          |       |     | <i>CGNL1</i>      | 5'UTR   |
| cg25542041 | 9  | 124,982,087 | 1.03E-05 | 0.311 | 0.339 |          |       |     | <i>LHX6</i>       | Body    |
| cg00747975 | 14 | 77,333,987  | 4.31E-05 | 0.311 | 0.291 |          |       |     | <i>C14orf166B</i> | Body    |
| cg02003184 | 19 | 51,324,465  | 1.86E-06 | 0.311 | 0.289 |          |       |     | <i>KLK1</i>       | Body    |
| cg09442613 | 12 | 76,054,089  | 0.000683 | 0.311 | 0.332 |          |       |     |                   |         |
| cg21944491 | 19 | 41,119,829  | 0.006111 | 0.311 | 0.170 |          |       | Yes | <i>LTBP4</i>      | Body    |
| cg03913921 | 7  | 120,496,827 | 2.47E-13 | 0.311 | 0.261 |          |       |     | <i>TSPAN12</i>    | 5'UTR   |
| cg07717632 | 9  | 140,172,631 | 2.67E-11 | 0.311 | 0.298 | 1.73E-16 | 0.154 |     | <i>C9orf167</i>   | 5'UTR   |
| cg15965716 | 1  | 164,688,315 | 5.38E-28 | 0.311 | 0.307 |          |       |     | <i>PBX1</i>       | Body    |
| cg02753187 | 17 | 46,919,180  | 1E-11    | 0.311 | 0.292 |          |       |     | <i>CALCOCO2</i>   | Body    |
| cg20299703 | 1  | 65,731,886  | 1.59E-08 | 0.311 | 0.266 |          |       |     | <i>DNAJC6</i>     | Body    |
| cg26230651 | 2  | 114,048,973 | 1.14E-08 | 0.311 | 0.279 |          |       |     | <i>LOC440839</i>  | Body    |

|            |    |             |          |       |       |          |       |     |                 |         |
|------------|----|-------------|----------|-------|-------|----------|-------|-----|-----------------|---------|
| cg09137696 | 16 | 56,672,415  | 1.76E-05 | 0.311 | 0.271 |          |       |     | <i>MT1A</i>     | TSS200  |
| cg03239552 | 12 | 54,339,653  | 0.000328 | 0.311 | 0.343 |          |       |     | <i>HOXC13</i>   | 3'UTR   |
| cg20388732 | 17 | 40,439,433  | 7.3E-08  | 0.311 | 0.278 |          |       |     | <i>STAT5A</i>   | TSS200  |
| cg16875629 | 19 | 36,389,575  | 0.012566 | 0.311 | 0.195 |          |       |     | <i>NFKBID</i>   | 5'UTR   |
| cg11064454 | 8  | 74,363,469  | 2.54E-21 | 0.311 | 0.283 |          |       |     | <i>STAU2</i>    | Body    |
| cg25888700 | X  | 21,676,344  | 0.034244 | 0.311 | 0.336 |          |       |     | <i>KLHL34</i>   | 5'UTR   |
| cg20618441 | 19 | 53,039,444  | 3.43E-06 | 0.311 | 0.313 |          |       |     | <i>ZNF808</i>   | 5'UTR   |
| cg26677584 | 13 | 28,541,468  | 0.000345 | 0.311 | 0.227 |          |       |     | <i>CDX2</i>     | Body    |
| cg10244368 | 19 | 53,039,145  | 2.44E-06 | 0.311 | 0.311 |          |       |     | <i>ZNF808</i>   | 5'UTR   |
| cg26232553 | 8  | 101,471,097 | 4.26E-07 | 0.311 | 0.302 |          |       |     |                 |         |
| cg03738352 | 4  | 25,657,381  | 0.003745 | 0.311 | 0.175 |          |       |     | <i>SLC34A2</i>  | TSS200  |
| cg10351914 | 17 | 19,290,690  | 4.58E-39 | 0.311 | 0.304 |          |       |     | <i>MFAP4</i>    | TSS200  |
| cg20027133 | 11 | 35,547,514  | 1.02E-13 | 0.311 | 0.300 |          |       |     | <i>PAMR1</i>    | TSS1500 |
| cg20885179 | 3  | 38,035,831  | 0.046173 | 0.311 | 0.120 |          |       |     | <i>VILL</i>     | Body    |
| cg14019323 | 12 | 65,218,413  | 0.041103 | 0.311 | 0.064 |          |       |     |                 |         |
| cg00237268 | 4  | 7,287,615   | 1.35E-05 | 0.311 | 0.241 |          |       |     | <i>SORCS2</i>   | Body    |
| cg11605903 | 6  | 78,176,622  | 0.006148 | 0.311 | 0.320 |          |       |     |                 |         |
| cg00388195 | 7  | 96,647,323  | 3.27E-09 | 0.311 | 0.306 |          |       |     |                 |         |
| cg20911718 | 14 | 24,867,491  | 1.91E-30 | 0.311 | 0.300 |          |       |     | <i>NYNRIN</i>   | TSS1500 |
| cg26567163 | 10 | 66,268,067  | 9.68E-07 | 0.311 | 0.368 |          |       |     |                 |         |
| cg12317456 | 16 | 55,512,868  | 3.37E-06 | 0.311 | 0.277 | 3.54E-24 | 0.199 |     | <i>MMP2</i>     | TSS1500 |
| cg10986455 | X  | 69,642,862  | 2.7E-27  | 0.311 | 0.299 |          |       |     | <i>GDPD2</i>    | TSS200  |
| cg05548912 | 17 | 40,464,318  | 0.010118 | 0.311 | 0.388 |          |       |     |                 |         |
| cg11448683 | 1  | 45,274,099  | 1.27E-06 | 0.311 | 0.305 |          |       |     | <i>TCTEX1D4</i> | TSS1500 |
| cg18276112 | 7  | 4,755,032   | 3.63E-27 | 0.311 | 0.300 |          |       |     | <i>FOXK1</i>    | Body    |
| cg22763593 | 2  | 135,125,439 | 5.09E-16 | 0.311 | 0.313 |          |       | Yes | <i>MGAT5</i>    | Body    |
| cg04124352 | 5  | 33,892,429  | 0.000151 | 0.311 | 0.344 |          |       |     | <i>ADAMTS12</i> | TSS1500 |
| cg07200348 | 13 | 36,045,201  | 1.5E-06  | 0.311 | 0.341 |          |       |     | <i>NBEA</i>     | Body    |
| cg01791371 | 6  | 50,817,193  | 6.3E-05  | 0.311 | 0.365 |          |       |     |                 |         |
| cg16590821 | X  | 118,107,876 | 0.046147 | 0.311 | 0.409 |          |       |     | <i>LONRF3</i>   | TSS1500 |
| cg16933386 | 10 | 124,906,011 | 1.36E-06 | 0.311 | 0.319 |          |       |     |                 |         |
| cg24279017 | 12 | 11,877,740  | 2.81E-13 | 0.311 | 0.312 |          |       | Yes | <i>ETV6</i>     | Body    |
| cg19007269 | 10 | 105,420,501 | 5.13E-09 | 0.311 | 0.239 |          |       |     | <i>SH3PXD2A</i> | Body    |
| cg07810726 | 5  | 158,524,649 | 0.015569 | 0.311 | 0.363 |          |       |     | <i>EBF1</i>     | Body    |

|            |    |             |          |       |       |          |       |  |                 |         |
|------------|----|-------------|----------|-------|-------|----------|-------|--|-----------------|---------|
| cg13419869 | 1  | 200,863,686 | 6.64E-08 | 0.311 | 0.343 |          |       |  | <i>C1orf106</i> | TSS1500 |
| cg17766007 | 19 | 51,522,921  | 2.85E-07 | 0.311 | 0.339 |          |       |  | <i>KLK10</i>    | 5'UTR   |
| cg07451886 | 16 | 3,097,405   | 2.49E-10 | 0.311 | 0.298 |          |       |  | <i>MMP25</i>    | Body    |
| cg15965190 | 2  | 208,370,032 | 3.46E-12 | 0.311 | 0.317 |          |       |  |                 |         |
| cg00514407 | 2  | 224,904,626 | 2.34E-05 | 0.311 | 0.215 | 5.66E-29 | 0.264 |  | <i>SERPINE2</i> | TSS1500 |
| cg22149516 | 5  | 101,632,314 | 2.06E-09 | 0.311 | 0.280 |          |       |  | <i>SLCO4C1</i>  | TSS200  |
| cg27345757 | 3  | 123,602,795 | 1.85E-06 | 0.311 | 0.284 |          |       |  | <i>MYLK</i>     | 5'UTR   |
| cg17053251 | 10 | 43,429,459  | 1.54E-07 | 0.311 | 0.326 |          |       |  |                 |         |
| cg24476033 | 19 | 6,710,658   | 0.000278 | 0.311 | 0.349 |          |       |  | <i>C3</i>       | Body    |
| cg01034993 | 15 | 68,992,751  | 2.32E-20 | 0.310 | 0.293 |          |       |  | <i>CORO2B</i>   | Body    |
| cg01486558 | 3  | 42,132,870  | 7.32E-12 | 0.310 | 0.297 |          |       |  | <i>TRAK1</i>    | 1stExon |
| cg05669418 | 2  | 177,022,962 | 0.001666 | 0.310 | 0.311 |          |       |  |                 |         |
| cg06588556 | 11 | 18,477,299  | 5.78E-07 | 0.310 | 0.248 |          |       |  | <i>LDHAL6A</i>  | TSS200  |
| cg17858328 | 1  | 92,952,521  | 5.97E-06 | 0.310 | 0.280 |          |       |  | <i>GFI1</i>     | TSS1500 |
| cg25099516 | 1  | 48,288,813  | 1.47E-19 | 0.310 | 0.337 |          |       |  |                 |         |
| cg11825059 | 7  | 14,876,371  | 1.64E-17 | 0.310 | 0.297 |          |       |  | <i>DGKB</i>     | Body    |
| cg04436755 | 15 | 74,218,767  | 5.05E-16 | 0.310 | 0.296 |          |       |  | <i>LOXL1</i>    | TSS200  |
| cg23387401 | 17 | 4,582,204   | 3.64E-14 | 0.310 | 0.313 |          |       |  | <i>PELP1</i>    | Body    |
| cg15719255 | 19 | 18,508,620  | 9.13E-12 | 0.310 | 0.294 |          |       |  | <i>LRRC25</i>   | TSS1500 |
| cg18061197 | 8  | 101,117,958 | 1.53E-16 | 0.310 | 0.301 |          |       |  | <i>RGS22</i>    | Body    |
| cg27549720 | 1  | 19,992,167  | 1.36E-06 | 0.310 | 0.303 |          |       |  | <i>HTR6</i>     | 5'UTR   |
| cg10377903 | 10 | 101,290,699 | 0.015413 | 0.310 | 0.389 |          |       |  |                 |         |
| cg15374435 | 13 | 80,911,692  | 7.66E-06 | 0.310 | 0.292 |          |       |  | <i>SPRY2</i>    | Body    |
| cg19713460 | 22 | 39,745,530  | 4.34E-22 | 0.310 | 0.284 |          |       |  | <i>SYNGR1</i>   | TSS1500 |
| cg24080793 | 17 | 62,097,951  | 0.000456 | 0.310 | 0.279 |          |       |  | <i>ICAM2</i>    | 5'UTR   |
| cg00091953 | 4  | 143,326,541 | 0.035252 | 0.310 | 0.193 |          |       |  | <i>INPP4B</i>   | Body    |
| cg09486778 | 2  | 223,169,609 | 9.9E-05  | 0.310 | 0.351 |          |       |  | <i>CCDC140</i>  | 3'UTR   |
| cg14780837 | 22 | 39,760,267  | 2.71E-15 | 0.310 | 0.321 |          |       |  | <i>SYNGR1</i>   | Body    |
| cg16202470 | 17 | 8,907,213   | 1.37E-06 | 0.310 | 0.301 |          |       |  |                 |         |
| cg23330006 | 12 | 106,507,713 | 2.22E-09 | 0.310 | 0.273 |          |       |  | <i>NUAK1</i>    | Body    |
| cg25120326 | 3  | 13,591,084  | 3.05E-10 | 0.310 | 0.298 |          |       |  | <i>FBLN2</i>    | 5'UTR   |
| cg06776898 | 15 | 73,611,079  | 0.001607 | 0.310 | 0.338 |          |       |  |                 |         |
| cg07775292 | 22 | 30,720,496  | 2.28E-10 | 0.310 | 0.330 |          |       |  | <i>TBC1D10A</i> | Body    |
| cg24596132 | 15 | 89,456,136  | 4.55E-05 | 0.310 | 0.243 |          |       |  | <i>MFGE8</i>    | Body    |

|            |    |             |          |       |       |          |       |  |                 |         |
|------------|----|-------------|----------|-------|-------|----------|-------|--|-----------------|---------|
| cg07891531 | 16 | 3,221,328   | 0.000422 | 0.310 | 0.357 |          |       |  |                 |         |
| cg23965931 | 4  | 184,828,386 | 2.84E-07 | 0.310 | 0.314 |          |       |  | <i>STOX2</i>    | Body    |
| cg25741533 | 19 | 5,829,199   | 1.83E-07 | 0.310 | 0.216 |          |       |  |                 |         |
| cg12726120 | 1  | 244,892,984 | 1.43E-07 | 0.310 | 0.243 |          |       |  |                 |         |
| cg17140469 | 8  | 18,238,381  | 8.16E-10 | 0.310 | 0.301 |          |       |  |                 |         |
| cg18703238 | 13 | 108,922,361 | 8.86E-07 | 0.310 | 0.276 |          |       |  | <i>TNFSF13B</i> | 1stExon |
| cg13430464 | 11 | 74,408,131  | 1.34E-22 | 0.310 | 0.299 |          |       |  | <i>CHRD2</i>    | Body    |
| cg15648389 | 12 | 54,448,769  | 3.47E-12 | 0.310 | 0.273 |          |       |  | <i>HOXC4</i>    | Body    |
| cg03010301 | 19 | 52,195,499  | 5.59E-10 | 0.310 | 0.274 |          |       |  | <i>MIR125A</i>  | TSS1500 |
| cg17905084 | 1  | 161,697,281 | 0.000259 | 0.310 | 0.302 |          |       |  | <i>FCRLB</i>    | Body    |
| cg27521476 | 10 | 102,896,376 | 1.48E-10 | 0.310 | 0.257 |          |       |  | <i>TLX1</i>     | Body    |
| cg20805133 | 2  | 242,802,192 | 2.79E-06 | 0.310 | 0.307 |          |       |  | <i>PDCD1</i>    | TSS1500 |
| cg05700129 | 1  | 1,935,125   | 0.000335 | 0.310 | 0.344 |          |       |  | <i>KIAA1751</i> | 5'UTR   |
| cg08263589 | 3  | 14,852,659  | 0.004855 | 0.310 | 0.345 |          |       |  |                 |         |
| cg16115588 | 12 | 50,297,588  | 2.33E-05 | 0.310 | 0.210 |          |       |  | <i>FAIM2</i>    | 1stExon |
| cg06721528 | 1  | 40,781,824  | 0.001686 | 0.310 | 0.197 |          |       |  | <i>COL9A2</i>   | Body    |
| cg04974290 | 17 | 5,001,047   | 0.000941 | 0.310 | 0.322 |          |       |  |                 |         |
| cg00368055 | 4  | 11,429,689  | 1.03E-08 | 0.310 | 0.315 |          |       |  | <i>HS3ST1</i>   | 5'UTR   |
| cg08965276 | 16 | 1,030,586   | 1.79E-19 | 0.310 | 0.297 |          |       |  | <i>SOX8</i>     | TSS1500 |
| cg05204123 | 17 | 1,613,017   | 1.29E-05 | 0.310 | 0.213 |          |       |  | <i>TLCD2</i>    | Body    |
| cg16405026 | 2  | 145,281,942 | 0.017808 | 0.310 | 0.343 |          |       |  |                 |         |
| cg14291663 | 9  | 135,454,951 | 2.68E-09 | 0.310 | 0.300 |          |       |  |                 |         |
| cg26596719 | 7  | 142,986,429 | 1.45E-22 | 0.310 | 0.299 |          |       |  | <i>CASP2</i>    | Body    |
| cg03442712 | 15 | 86,292,964  | 3.17E-37 | 0.310 | 0.309 |          |       |  |                 |         |
| cg25616777 | 1  | 27,645,056  | 2.17E-06 | 0.310 | 0.254 |          |       |  |                 |         |
| cg09639151 | 5  | 140,810,920 | 1.17E-06 | 0.310 | 0.331 |          |       |  | <i>PCDHGA4</i>  | Body    |
| cg17918556 | 2  | 169,372,300 | 4.95E-16 | 0.310 | 0.313 |          |       |  | <i>LASS6</i>    | Body    |
| cg23710748 | 7  | 124,431,027 | 1.83E-05 | 0.310 | 0.341 |          |       |  |                 |         |
| cg09811860 | 1  | 211,803,715 | 3.92E-24 | 0.310 | 0.290 |          |       |  |                 |         |
| cg22304255 | 6  | 29,975,204  | 2.31E-13 | 0.310 | 0.295 |          |       |  | <i>HLA-J</i>    | Body    |
| cg13376290 | 17 | 4,614,420   | 0.021787 | 0.310 | 0.108 |          |       |  | <i>ARRB2</i>    | Body    |
| cg19275261 | 18 | 5,630,072   | 0.004559 | 0.310 | 0.372 |          |       |  |                 |         |
| cg08760398 | X  | 119,442,971 | 0.008837 | 0.310 | 0.402 |          |       |  | <i>FAM70A</i>   | Body    |
| cg09109450 | 2  | 21,022,565  | 0.000277 | 0.310 | 0.274 | 7.69E-22 | 0.193 |  | <i>C2orf43</i>  | 5'UTR   |

|            |    |             |          |       |       |          |       |  |                  |         |
|------------|----|-------------|----------|-------|-------|----------|-------|--|------------------|---------|
| cg04528829 | 12 | 115,133,294 | 1.29E-14 | 0.310 | 0.292 |          |       |  |                  |         |
| cg13564825 | 19 | 38,747,201  | 0.016902 | 0.310 | 0.270 |          |       |  | <i>PPP1R14A</i>  | TSS200  |
| cg00037457 | 17 | 59,531,744  | 3.41E-08 | 0.310 | 0.307 |          |       |  |                  |         |
| cg22336337 | 8  | 53,161,949  | 1.19E-21 | 0.310 | 0.306 |          |       |  | <i>ST18</i>      | 5'UTR   |
| cg01812599 | 10 | 103,043,991 | 3.92E-06 | 0.310 | 0.253 |          |       |  |                  |         |
| cg03365751 | 22 | 42,828,386  | 1.39E-17 | 0.310 | 0.294 |          |       |  | <i>NFAM1</i>     | 1stExon |
| cg06539694 | X  | 68,348,545  | 4.38E-08 | 0.310 | 0.308 |          |       |  |                  |         |
| cg06148685 | 9  | 113,800,909 | 0.003767 | 0.310 | 0.227 |          |       |  | <i>LPAR1</i>     | TSS1500 |
| cg03162045 | 3  | 142,443,933 | 0.000324 | 0.310 | 0.231 |          |       |  | <i>TRPC1</i>     | Body    |
| cg11019430 | 10 | 29,096,857  | 1.2E-07  | 0.310 | 0.319 |          |       |  |                  |         |
| cg03162492 | 3  | 134,010,471 | 1.8E-19  | 0.310 | 0.312 |          |       |  |                  |         |
| cg23621729 | 1  | 1,935,445   | 0.000232 | 0.310 | 0.322 |          |       |  | <i>KIAA1751</i>  | TSS200  |
| cg10512875 | 12 | 29,936,174  | 0.001939 | 0.310 | 0.238 |          |       |  | <i>TMTC1</i>     | 5'UTR   |
| cg16167741 | 1  | 41,174,793  | 0.014847 | 0.310 | 0.285 |          |       |  | <i>NFYC</i>      | 5'UTR   |
| cg02364610 | 11 | 46,317,036  | 0.000128 | 0.310 | 0.237 |          |       |  | <i>CREB3L1</i>   | Body    |
| cg18741404 | 6  | 29,894,253  | 5.49E-08 | 0.310 | 0.296 |          |       |  | <i>HCG4P6</i>    | TSS1500 |
| cg26034516 | 17 | 76,228,121  | 0.001239 | 0.310 | 0.344 |          |       |  | <i>LOC283999</i> | Body    |
| cg12071888 | 1  | 91,195,159  | 0.010621 | 0.310 | 0.342 |          |       |  |                  |         |
| cg19013611 | 7  | 157,668,051 | 9.18E-08 | 0.310 | 0.238 |          |       |  | <i>PTPRN2</i>    | Body    |
| cg10701640 | 17 | 43,249,399  | 8.94E-08 | 0.309 | 0.299 |          |       |  |                  |         |
| cg26165269 | 17 | 77,765,514  | 0.003486 | 0.309 | 0.310 |          |       |  |                  |         |
| cg09760963 | 4  | 154,680,808 | 0.003424 | 0.309 | 0.400 |          |       |  | <i>RNF175</i>    | Body    |
| cg26606256 | 17 | 43,974,804  | 0.000189 | 0.309 | 0.287 |          |       |  | <i>MAPT</i>      | 5'UTR   |
| cg22921760 | 14 | 22,005,368  | 3.58E-24 | 0.309 | 0.318 |          |       |  | <i>SALL2</i>     | TSS200  |
| cg09709472 | 8  | 10,586,959  | 6.36E-15 | 0.309 | 0.294 |          |       |  | <i>SOX7</i>      | Body    |
| cg03870138 | 16 | 88,717,850  | 3.39E-08 | 0.309 | 0.311 |          |       |  | <i>CYBA</i>      | TSS1500 |
| cg17010100 | 5  | 59,188,112  | 1.86E-13 | 0.309 | 0.289 |          |       |  | <i>PDE4D</i>     | Body    |
| cg03717588 | 11 | 56,948,018  | 0.006741 | 0.309 | 0.303 |          |       |  | <i>LRR55</i>     | TSS1500 |
| cg11703796 | 12 | 6,055,201   | 1.24E-10 | 0.309 | 0.263 |          |       |  | <i>ANO2</i>      | Body    |
| cg14765959 | 6  | 106,429,316 | 0.001222 | 0.309 | 0.312 |          |       |  |                  |         |
| cg12611243 | 5  | 149,897,230 | 1.24E-06 | 0.309 | 0.277 |          |       |  | <i>NDST1</i>     | 5'UTR   |
| cg04844714 | 8  | 10,872,604  | 0.000373 | 0.309 | 0.307 |          |       |  | <i>XKR6</i>      | Body    |
| cg14563260 | 9  | 113,801,320 | 1.21E-08 | 0.309 | 0.212 | 7.46E-30 | 0.321 |  | <i>LPAR1</i>     | TSS1500 |
| cg06018401 | 5  | 71,404,897  | 5.41E-06 | 0.309 | 0.294 |          |       |  | <i>MAP1B</i>     | Body    |

|            |    |             |          |       |       |          |       |  |                     |         |
|------------|----|-------------|----------|-------|-------|----------|-------|--|---------------------|---------|
| cg12973941 | 4  | 13,545,639  | 1.57E-06 | 0.309 | 0.289 |          |       |  | <i>NKX3-2</i>       | 1stExon |
| cg25203031 | 1  | 66,999,813  | 0.005451 | 0.309 | 0.292 |          |       |  | <i>SGIP1</i>        | TSS200  |
| cg00920892 | 8  | 37,732,224  | 1.52E-14 | 0.309 | 0.265 |          |       |  | <i>RAB11FIP1</i>    | Body    |
| cg22274539 | 12 | 103,696,209 | 2.41E-05 | 0.309 | 0.220 |          |       |  | <i>C12orf42</i>     | Body    |
| cg06580551 | 3  | 42,947,481  | 0.043654 | 0.309 | 0.210 |          |       |  | <i>ZNF662</i>       | TSS200  |
| cg22247664 | 1  | 110,199,126 | 2.61E-09 | 0.309 | 0.304 |          |       |  | <i>GSTM4</i>        | Body    |
| cg25834415 | 2  | 241,758,805 | 4.76E-05 | 0.309 | 0.250 |          |       |  | <i>KIF1A</i>        | 5'UTR   |
| cg01907098 | 21 | 45,149,141  | 6.61E-07 | 0.309 | 0.236 |          |       |  | <i>PDXK</i>         | Body    |
| cg18586886 | 6  | 30,652,399  | 6.72E-11 | 0.309 | 0.316 |          |       |  | <i>KIAA1949</i>     | Body    |
| cg01484686 | 6  | 106,258,629 | 2.69E-07 | 0.309 | 0.306 |          |       |  |                     |         |
| cg20435725 | 2  | 107,103,716 | 0.020887 | 0.309 | 0.102 |          |       |  |                     |         |
| cg24434800 | 1  | 119,542,295 | 0.001722 | 0.309 | 0.344 |          |       |  |                     |         |
| cg11483789 | 3  | 122,745,560 | 2.16E-05 | 0.309 | 0.212 |          |       |  | <i>SEMA5B</i>       | 5'UTR   |
| cg00575003 | 1  | 217,261,949 | 4.15E-10 | 0.309 | 0.254 |          |       |  | <i>ESRRG</i>        | 5'UTR   |
| cg01242903 | 12 | 89,744,877  | 2.09E-11 | 0.309 | 0.325 |          |       |  | <i>DUSP6</i>        | Body    |
| cg08703857 | 7  | 2,653,651   | 3.57E-14 | 0.309 | 0.307 |          |       |  | <i>IQCE</i>         | 3'UTR   |
| cg09213964 | 12 | 122,668,037 | 6.05E-08 | 0.309 | 0.275 |          |       |  | <i>LRRC43</i>       | 5'UTR   |
| cg09515442 | X  | 48,689,942  | 0.000345 | 0.309 | 0.317 |          |       |  | <i>PCSK1N</i>       | Body    |
| cg04243822 | 17 | 77,030,221  | 9.51E-13 | 0.309 | 0.283 |          |       |  | <i>C1QTNF1</i>      | 5'UTR   |
| cg10113101 | 7  | 30,029,743  | 0.006939 | 0.309 | 0.173 |          |       |  | <i>SCRN1</i>        | TSS1500 |
| cg07831351 | 20 | 3,229,402   | 2.07E-06 | 0.309 | 0.311 |          |       |  |                     |         |
| cg00005847 | 2  | 177,029,073 | 0.000352 | 0.309 | 0.242 | 1.03E-10 | 0.125 |  | <i>HOXD3</i>        | 5'UTR   |
| cg19006008 | 19 | 16,999,768  | 5.88E-07 | 0.309 | 0.266 | 3.79E-17 | 0.171 |  | <i>F2RL3</i>        | TSS200  |
| cg02642117 | 6  | 21,033,836  | 6.52E-19 | 0.309 | 0.295 |          |       |  | <i>CDKAL1</i>       | Body    |
| cg10136354 | 2  | 73,151,457  | 0.008343 | 0.309 | 0.234 |          |       |  | <i>EMX1</i>         | Body    |
| cg23543318 | 4  | 1,195,845   | 2.12E-06 | 0.309 | 0.307 |          |       |  | <i>LOC100130872</i> | Body    |
| cg15985184 | 19 | 51,830,311  | 0.000233 | 0.309 | 0.382 |          |       |  | <i>IGLON5</i>       | Body    |
| cg04738464 | 2  | 218,868,754 | 9.18E-22 | 0.309 | 0.292 |          |       |  |                     |         |
| cg07844977 | 6  | 2,903,699   | 1.6E-06  | 0.309 | 0.277 |          |       |  | <i>SERPINB9</i>     | TSS200  |
| cg19595012 | 4  | 81,106,312  | 0.016182 | 0.309 | 0.366 |          |       |  | <i>PRDM8</i>        | TSS200  |
| cg05482942 | 10 | 102,899,285 | 0.000244 | 0.309 | 0.295 |          |       |  |                     |         |
| cg26340149 | 11 | 69,988,497  | 8.71E-17 | 0.309 | 0.302 |          |       |  | <i>ANO1</i>         | Body    |
| cg07095230 | 17 | 59,480,730  | 9.98E-06 | 0.309 | 0.260 |          |       |  | <i>TBX2</i>         | Body    |
| cg07193234 | 15 | 28,341,783  | 3.52E-10 | 0.309 | 0.282 |          |       |  | <i>OCA2</i>         | 5'UTR   |

|            |    |             |          |       |       |          |       |  |                 |         |
|------------|----|-------------|----------|-------|-------|----------|-------|--|-----------------|---------|
| cg13337740 | 17 | 33,446,298  | 1.82E-16 | 0.309 | 0.314 |          |       |  | <i>RAD51L3</i>  | Body    |
| cg16731240 | 19 | 52,391,250  | 0.003059 | 0.309 | 0.283 | 7.45E-16 | 0.343 |  | <i>ZNF577</i>   | TSS200  |
| cg14781778 | 22 | 45,608,692  | 1.33E-07 | 0.309 | 0.275 |          |       |  | <i>C22orf9</i>  | Body    |
| cg21737226 | 8  | 53,326,668  | 1.23E-09 | 0.309 | 0.339 |          |       |  |                 |         |
| cg06339706 | 19 | 49,371,285  | 2.19E-12 | 0.309 | 0.303 | 5.35E-23 | 0.220 |  | <i>PLEKHA4</i>  | 5'UTR   |
| cg18534077 | 10 | 104,628,846 | 5.67E-12 | 0.309 | 0.259 |          |       |  | <i>AS3MT</i>    | TSS1500 |
| cg14001664 | 2  | 132,088,801 | 0.000182 | 0.309 | 0.297 |          |       |  |                 |         |
| cg03449398 | 7  | 92,673,015  | 2.3E-13  | 0.309 | 0.281 |          |       |  |                 |         |
| cg15936066 | 8  | 42,356,637  | 3.53E-12 | 0.309 | 0.295 |          |       |  | <i>SLC20A2</i>  | 5'UTR   |
| cg10259701 | 15 | 31,645,503  | 0.009367 | 0.309 | 0.189 |          |       |  | <i>KLF13</i>    | Body    |
| cg01238435 | 5  | 141,595,696 | 0.000736 | 0.309 | 0.327 |          |       |  |                 |         |
| cg22812684 | 1  | 70,035,392  | 7.21E-06 | 0.309 | 0.293 |          |       |  |                 |         |
| cg11758283 | 6  | 7,998,697   | 5.49E-17 | 0.308 | 0.281 |          |       |  |                 |         |
| cg26719062 | 6  | 30,095,349  | 3.2E-14  | 0.308 | 0.285 |          |       |  |                 |         |
| cg25214310 | 3  | 149,934,218 | 3.11E-09 | 0.308 | 0.324 |          |       |  |                 |         |
| cg00585901 | 1  | 155,035,388 | 0.015012 | 0.308 | 0.180 |          |       |  | <i>EFNA4</i>    | TSS1500 |
| cg01704924 | 12 | 54,446,996  | 7.57E-09 | 0.308 | 0.264 |          |       |  | <i>HOXC4</i>    | 5'UTR   |
| cg11500797 | 7  | 96,652,123  | 4E-08    | 0.308 | 0.296 | 4.88E-14 | 0.212 |  | <i>DLX5</i>     | Body    |
| cg12892471 | 12 | 50,616,779  | 7.42E-24 | 0.308 | 0.309 |          |       |  | <i>LIMA1</i>    | Body    |
| cg24472939 | 4  | 175,139,486 | 0.001266 | 0.308 | 0.233 |          |       |  |                 |         |
| cg06179011 | 11 | 843,897     | 3.52E-17 | 0.308 | 0.276 |          |       |  | <i>TSPAN4</i>   | TSS1500 |
| cg07168526 | 7  | 116,797,907 | 3.42E-30 | 0.308 | 0.304 |          |       |  | <i>ST7</i>      | Body    |
| cg20333836 | 1  | 156,215,418 | 6.08E-08 | 0.308 | 0.329 |          |       |  | <i>PAQR6</i>    | Body    |
| cg10629004 | 20 | 21,696,467  | 2.22E-06 | 0.308 | 0.354 |          |       |  | <i>PAX1</i>     | 3'UTR   |
| cg07515422 | 19 | 40,993,713  | 6E-07    | 0.308 | 0.266 |          |       |  | <i>SPTBN4</i>   | Body    |
| cg04596071 | 7  | 2,155,899   | 5.04E-21 | 0.308 | 0.309 |          |       |  | <i>MAD1L1</i>   | Body    |
| cg12414174 | 12 | 89,748,895  | 7.37E-12 | 0.308 | 0.288 |          |       |  |                 |         |
| cg15724945 | 1  | 119,548,527 | 4.16E-13 | 0.308 | 0.269 |          |       |  |                 |         |
| cg23623270 | 17 | 42,402,962  | 6.53E-09 | 0.308 | 0.302 |          |       |  | <i>SLC25A39</i> | TSS1500 |
| cg10959198 | 15 | 93,632,896  | 1.23E-05 | 0.308 | 0.325 |          |       |  | <i>RGMA</i>     | TSS1500 |
| cg26004759 | 4  | 141,489,018 | 3.97E-06 | 0.308 | 0.270 |          |       |  | <i>UCP1</i>     | Body    |
| cg25666433 | 6  | 28,367,279  | 0.000503 | 0.308 | 0.301 |          |       |  | <i>ZSCAN12</i>  | Body    |
| cg00852846 | 2  | 85,664,713  | 7.94E-05 | 0.308 | 0.207 |          |       |  |                 |         |
| cg02366320 | 16 | 88,967,522  | 4.83E-70 | 0.308 | 0.309 |          |       |  | <i>CBFA2T3</i>  | Body    |

|            |    |             |          |       |       |          |       |  |                  |         |
|------------|----|-------------|----------|-------|-------|----------|-------|--|------------------|---------|
| cg10629165 | 5  | 66,124,563  | 0.001511 | 0.308 | 0.133 |          |       |  | <i>MAST4</i>     | TSS200  |
| cg10974980 | 15 | 74,243,781  | 5.07E-05 | 0.308 | 0.280 |          |       |  | <i>LOXL1</i>     | Body    |
| cg06231244 | 1  | 2,460,761   | 2E-09    | 0.308 | 0.297 |          |       |  | <i>HES5</i>      | 3'UTR   |
| cg25199322 | 1  | 151,693,838 | 0.000192 | 0.308 | 0.292 |          |       |  | <i>C1orf230</i>  | TSS200  |
| cg24934400 | 4  | 4,873,966   | 0.041793 | 0.308 | 0.176 |          |       |  |                  |         |
| cg26064774 | 4  | 6,666,009   | 0.000311 | 0.308 | 0.332 |          |       |  |                  |         |
| cg21821833 | 3  | 42,306,493  | 0.000295 | 0.308 | 0.349 |          |       |  | <i>CCK</i>       | TSS200  |
| cg26091021 | 2  | 177,021,826 | 7.46E-05 | 0.308 | 0.285 |          |       |  |                  |         |
| cg20164887 | 22 | 50,968,250  | 0.038592 | 0.308 | 0.236 |          |       |  | <i>TYMP</i>      | 5'UTR   |
| cg01348733 | 17 | 33,700,757  | 0.000289 | 0.308 | 0.333 |          |       |  | <i>SLFN11</i>    | TSS200  |
| cg10465866 | 6  | 28,574,471  | 0.00516  | 0.308 | 0.275 |          |       |  |                  |         |
| cg15093997 | 10 | 73,769,828  | 1.06E-14 | 0.308 | 0.290 |          |       |  | <i>CHST3</i>     | 3'UTR   |
| cg03395558 | 11 | 70,508,329  | 7.79E-09 | 0.308 | 0.298 |          |       |  | <i>SHANK2</i>    | Body    |
| cg05740959 | X  | 49,087,234  | 0.000589 | 0.308 | 0.307 |          |       |  | <i>CACNA1F</i>   | Body    |
| cg06807397 | 13 | 44,948,413  | 8.2E-09  | 0.308 | 0.245 |          |       |  | <i>SERP2</i>     | Body    |
| cg11413133 | 17 | 21,281,318  | 2.1E-26  | 0.308 | 0.320 |          |       |  | <i>KCNJ12</i>    | 5'UTR   |
| cg26772854 | 3  | 159,756,793 | 0.002652 | 0.308 | 0.338 |          |       |  |                  |         |
| cg03605542 | 5  | 59,929,339  | 8.82E-31 | 0.308 | 0.290 |          |       |  | <i>DEPDC1B</i>   | Body    |
| cg07887891 | 3  | 33,429,950  | 2.83E-07 | 0.308 | 0.320 |          |       |  | <i>UBP1</i>      | 3'UTR   |
| cg09734791 | 8  | 72,756,155  | 0.026751 | 0.308 | 0.360 |          |       |  | <i>MSC</i>       | 1stExon |
| cg19831077 | 7  | 151,107,924 | 1.18E-15 | 0.308 | 0.321 | 1.5E-28  | 0.233 |  | <i>WDR86</i>     | TSS1500 |
| cg22660207 | 4  | 174,320,772 | 4.34E-10 | 0.308 | 0.351 |          |       |  | <i>SCRG1</i>     | TSS200  |
| cg25027125 | 14 | 35,182,801  | 1.19E-15 | 0.308 | 0.257 |          |       |  | <i>CFL2</i>      | Body    |
| cg04844574 | 12 | 122,028,594 | 4.89E-06 | 0.308 | 0.286 |          |       |  |                  |         |
| cg10503083 | 2  | 177,003,280 | 5.4E-05  | 0.308 | 0.298 |          |       |  |                  |         |
| cg04132540 | 8  | 56,851,846  | 8.38E-41 | 0.308 | 0.306 |          |       |  | <i>LYN</i>       | 5'UTR   |
| cg26043257 | 4  | 15,780,238  | 0.020871 | 0.308 | 0.280 | 6.29E-18 | 0.241 |  | <i>CD38</i>      | 1stExon |
| cg21101743 | 7  | 39,649,254  | 1.66E-05 | 0.308 | 0.314 |          |       |  | <i>LOC646999</i> | Body    |
| cg22289837 | 8  | 86,350,278  | 1.22E-11 | 0.308 | 0.327 | 5.67E-21 | 0.160 |  | <i>CA3</i>       | TSS1500 |
| cg12453905 | 4  | 154,143,694 | 0.045814 | 0.308 | 0.260 |          |       |  | <i>TRIM2</i>     | Body    |
| cg18499201 | 17 | 77,395,887  | 2.47E-06 | 0.308 | 0.275 |          |       |  | <i>HRNBP3</i>    | 5'UTR   |
| cg26201811 | 22 | 51,111,714  | 3.05E-09 | 0.308 | 0.277 |          |       |  | <i>SHANK3</i>    | TSS1500 |
| cg12700449 | 17 | 34,121,837  | 5.42E-20 | 0.308 | 0.310 |          |       |  | <i>MMP28</i>     | Body    |
| cg19513321 | 2  | 85,811,432  | 3.48E-07 | 0.308 | 0.303 |          |       |  | <i>VAMP5</i>     | TSS200  |



|            |    |             |          |       |       |  |  |  |                     |         |
|------------|----|-------------|----------|-------|-------|--|--|--|---------------------|---------|
| cg04184019 | 4  | 85,424,288  | 8.71E-07 | 0.308 | 0.282 |  |  |  |                     |         |
| cg21416692 | 1  | 33,803,805  | 7.53E-15 | 0.308 | 0.298 |  |  |  | <i>PHC2</i>         | 5'UTR   |
| cg05858889 | 7  | 39,649,224  | 1.21E-05 | 0.308 | 0.345 |  |  |  | <i>LOC646999</i>    | Body    |
| cg07158503 | 5  | 135,415,693 | 1.04E-10 | 0.308 | 0.286 |  |  |  |                     |         |
| cg05923687 | 1  | 63,795,711  | 2.41E-07 | 0.308 | 0.274 |  |  |  |                     |         |
| cg05204104 | 2  | 235,403,141 | 1.13E-05 | 0.308 | 0.334 |  |  |  | <i>ARL4C</i>        | 3'UTR   |
| cg10278318 | 2  | 235,276,581 | 1.9E-11  | 0.308 | 0.288 |  |  |  |                     |         |
| cg26624026 | 19 | 18,416,001  | 2.57E-09 | 0.308 | 0.338 |  |  |  |                     |         |
| cg25054580 | 4  | 54,976,019  | 6.57E-10 | 0.308 | 0.280 |  |  |  |                     |         |
| cg10210369 | 15 | 90,197,924  | 0.000199 | 0.308 | 0.225 |  |  |  | <i>KIF7</i>         | 5'UTR   |
| cg16913064 | 17 | 45,949,878  | 3.64E-13 | 0.308 | 0.254 |  |  |  |                     |         |
| cg25451249 | 11 | 19,736,241  | 9.76E-06 | 0.308 | 0.307 |  |  |  | <i>LOC100126784</i> | TSS200  |
| cg23851088 | X  | 40,004,432  | 6.22E-07 | 0.308 | 0.223 |  |  |  | <i>BCOR</i>         | 5'UTR   |
| cg17863743 | 10 | 100,993,587 | 8.17E-06 | 0.308 | 0.338 |  |  |  | <i>HPSE2</i>        | Body    |
| cg09357934 | 2  | 159,651,918 | 6.4E-10  | 0.308 | 0.273 |  |  |  | <i>DAPL1</i>        | 1stExon |
| cg13799919 | 13 | 28,212,848  | 8.5E-14  | 0.308 | 0.319 |  |  |  | <i>POLR1D</i>       | Body    |
| cg04105511 | 12 | 54,409,207  | 0.010204 | 0.308 | 0.292 |  |  |  | <i>HOXC4</i>        | TSS1500 |
| cg06958829 | 17 | 48,546,118  | 6.41E-09 | 0.307 | 0.315 |  |  |  | <i>ACSF2</i>        | Body    |
| cg22916722 | 14 | 76,605,056  | 0.024764 | 0.307 | 0.239 |  |  |  |                     |         |
| cg10665891 | 12 | 117,042,917 | 0.008883 | 0.307 | 0.352 |  |  |  |                     |         |
| cg26996569 | 12 | 121,829,743 | 9.87E-08 | 0.307 | 0.310 |  |  |  |                     |         |
| cg08050748 | 14 | 51,562,890  | 9.4E-08  | 0.307 | 0.323 |  |  |  | <i>TRIM9</i>        | TSS1500 |
| cg12022772 | 2  | 131,130,468 | 0.002107 | 0.307 | 0.253 |  |  |  | <i>PTPN18</i>       | Body    |
| cg09969806 | 2  | 241,758,399 | 3.37E-08 | 0.307 | 0.299 |  |  |  | <i>KIF1A</i>        | 5'UTR   |
| cg06315607 | 22 | 19,512,084  | 7.79E-05 | 0.307 | 0.322 |  |  |  | <i>CLDN5</i>        | 1stExon |
| cg25499397 | 3  | 51,990,575  | 0.003946 | 0.307 | 0.315 |  |  |  | <i>GPR62</i>        | 1stExon |
| cg23460943 | 12 | 125,333,358 | 1.24E-34 | 0.307 | 0.288 |  |  |  | <i>SCARB1</i>       | Body    |
| cg12403889 | 1  | 11,753,338  | 1.04E-08 | 0.307 | 0.313 |  |  |  | <i>C1orf187</i>     | 5'UTR   |
| cg13451127 | 3  | 47,050,803  | 1.42E-14 | 0.307 | 0.266 |  |  |  | <i>NBEAL2</i>       | Body    |
| cg25424856 | X  | 50,557,036  | 0.022073 | 0.307 | 0.380 |  |  |  | <i>SHROOM4</i>      | 5'UTR   |
| cg25308508 | 5  | 3,592,638   | 1.72E-11 | 0.307 | 0.330 |  |  |  |                     |         |
| cg02340053 | 13 | 36,044,886  | 0.000172 | 0.307 | 0.359 |  |  |  | <i>NBEA</i>         | Body    |
| cg14212504 | 3  | 128,564,815 | 0.010286 | 0.307 | 0.374 |  |  |  |                     |         |
| cg08983217 | 2  | 96,991,149  | 2.11E-08 | 0.307 | 0.275 |  |  |  | <i>ITPRIPL1</i>     | TSS1500 |

|            |    |             |          |       |       |          |       |  |                 |         |
|------------|----|-------------|----------|-------|-------|----------|-------|--|-----------------|---------|
| cg19238415 | 11 | 32,916,120  | 1.37E-09 | 0.307 | 0.331 |          |       |  | <i>QSER1</i>    | 5'UTR   |
| cg10277651 | 20 | 623,361     | 0.002005 | 0.307 | 0.264 |          |       |  |                 |         |
| cg11909137 | 18 | 46,461,202  | 3.3E-07  | 0.307 | 0.285 |          |       |  | <i>SMAD7</i>    | Body    |
| cg14099595 | 5  | 145,717,283 | 0.023178 | 0.307 | 0.298 |          |       |  | <i>POU4F3</i>   | TSS1500 |
| cg01781417 | 18 | 78,004,045  | 8.81E-23 | 0.307 | 0.282 |          |       |  | <i>PARD6G</i>   | Body    |
| cg01968402 | 6  | 137,817,775 | 0.002464 | 0.307 | 0.350 |          |       |  |                 |         |
| cg20371266 | 2  | 233,390,781 | 6.22E-07 | 0.307 | 0.267 |          |       |  | <i>CHRND</i>    | TSS200  |
| cg24020152 | 4  | 154,419,554 | 3.71E-16 | 0.307 | 0.295 |          |       |  | <i>KIAA0922</i> | Body    |
| cg02345747 | 3  | 182,879,754 | 7.91E-08 | 0.307 | 0.227 |          |       |  | <i>LAMP3</i>    | Body    |
| cg04078410 | 5  | 77,269,250  | 0.000177 | 0.307 | 0.232 |          |       |  |                 |         |
| cg09499136 | 6  | 168,975,608 | 1.01E-17 | 0.307 | 0.292 |          |       |  | <i>SMOC2</i>    | Body    |
| cg11509907 | 2  | 235,404,686 | 2.59E-05 | 0.307 | 0.204 |          |       |  | <i>ARL4C</i>    | 1stExon |
| cg08954277 | 4  | 1,535,673   | 3.83E-05 | 0.307 | 0.313 |          |       |  |                 |         |
| cg21575509 | 3  | 138,658,704 | 0.001651 | 0.307 | 0.345 |          |       |  |                 |         |
| cg23353432 | 20 | 44,639,847  | 7.65E-10 | 0.307 | 0.291 |          |       |  | <i>MMP9</i>     | Body    |
| cg02619001 | 17 | 47,592,333  | 4.59E-19 | 0.307 | 0.294 |          |       |  | <i>NGFR</i>     | 3'UTR   |
| cg23671221 | 1  | 44,031,300  | 0.000005 | 0.307 | 0.311 |          |       |  | <i>PTPRF</i>    | Body    |
| cg26271591 | 2  | 178,125,956 | 3.67E-11 | 0.307 | 0.272 |          |       |  | <i>NFE2L2</i>   | Body    |
| cg04981492 | 19 | 15,218,713  | 3.93E-06 | 0.307 | 0.325 | 7.12E-29 | 0.200 |  | <i>SYDE1</i>    | Body    |
| cg09404551 | 8  | 121,136,951 | 3.88E-07 | 0.307 | 0.321 |          |       |  | <i>COL14A1</i>  | TSS1500 |
| cg14276379 | 9  | 97,663,142  | 8.27E-12 | 0.307 | 0.306 |          |       |  | <i>C9orf3</i>   | Body    |
| cg01029623 | 12 | 122,016,779 | 4.51E-20 | 0.307 | 0.314 |          |       |  | <i>KDM2B</i>    | Body    |
| cg09957386 | 7  | 134,144,062 | 0.001935 | 0.307 | 0.198 |          |       |  | <i>AKR1B1</i>   | TSS200  |
| cg09424526 | 2  | 223,163,809 | 0.002161 | 0.307 | 0.293 |          |       |  | <i>PAX3</i>     | TSS200  |
| cg13742526 | 19 | 2,252,432   | 0.002189 | 0.307 | 0.322 |          |       |  | <i>JSRP1</i>    | Body    |
| cg18172881 | 3  | 136,538,801 | 0.007668 | 0.307 | 0.154 |          |       |  | <i>TMEM22</i>   | 5'UTR   |
| cg06522768 | 2  | 38,265,635  | 1.05E-05 | 0.307 | 0.278 |          |       |  | <i>FAM82A1</i>  | Body    |
| cg14080475 | 9  | 117,150,495 | 2.23E-05 | 0.307 | 0.185 |          |       |  | <i>AKNA</i>     | 5'UTR   |
| cg02695609 | 7  | 124,430,950 | 0.000155 | 0.307 | 0.316 |          |       |  |                 |         |
| cg10453365 | 15 | 90,039,909  | 4.74E-09 | 0.307 | 0.316 | 2E-36    | 0.287 |  | <i>RHCG</i>     | TSS200  |
| cg22489321 | 13 | 100,643,388 | 2.62E-08 | 0.307 | 0.299 |          |       |  |                 |         |
| cg01325465 | 16 | 85,123,554  | 5.43E-24 | 0.307 | 0.291 |          |       |  | <i>KIAA0513</i> | 3'UTR   |
| cg27413008 | 16 | 28,519,597  | 5.84E-10 | 0.307 | 0.306 |          |       |  | <i>IL27</i>     | TSS1500 |
| cg25756241 | 12 | 50,221,559  | 0.026675 | 0.307 | 0.162 |          |       |  | <i>NCKAP5L</i>  | 5'UTR   |

|            |    |             |          |       |       |          |       |  |                  |         |
|------------|----|-------------|----------|-------|-------|----------|-------|--|------------------|---------|
| cg04623837 | 6  | 29,943,414  | 2.23E-06 | 0.307 | 0.317 | 7.57E-10 | 0.175 |  | <i>HCG9</i>      | Body    |
| cg02220078 | 5  | 132,386,904 | 1.32E-20 | 0.307 | 0.292 |          |       |  | <i>HSPA4</i>     | TSS1500 |
| cg03778669 | 6  | 28,457,246  | 0.022509 | 0.307 | 0.294 |          |       |  |                  |         |
| cg13161961 | 7  | 120,970,240 | 0.00275  | 0.307 | 0.333 |          |       |  | <i>WNT16</i>     | Body    |
| cg03883555 | 13 | 24,007,434  | 0.014739 | 0.307 | 0.185 |          |       |  | <i>SACS</i>      | 5'UTR   |
| cg26191447 | 2  | 191,656,418 | 1.17E-05 | 0.307 | 0.268 |          |       |  |                  |         |
| cg08407114 | 5  | 36,690,259  | 0.002708 | 0.307 | 0.104 |          |       |  |                  |         |
| cg02873263 | 14 | 70,476,756  | 2.95E-17 | 0.307 | 0.300 |          |       |  | <i>SMOC1</i>     | Body    |
| cg06211323 | 13 | 109,248,488 | 1.11E-12 | 0.307 | 0.229 |          |       |  | <i>MYO16</i>     | TSS200  |
| cg05404698 | 6  | 28,956,247  | 2.88E-06 | 0.307 | 0.299 |          |       |  |                  |         |
| cg12863693 | 15 | 85,201,151  | 7.01E-06 | 0.307 | 0.259 |          |       |  | <i>NMB</i>       | Body    |
| cg01079658 | 7  | 99,155,872  | 0.000299 | 0.306 | 0.199 |          |       |  | <i>ZNF655</i>    | TSS200  |
| cg13467672 | 17 | 40,464,625  | 5.86E-23 | 0.306 | 0.310 |          |       |  |                  |         |
| cg09175834 | 12 | 78,225,315  | 4.5E-12  | 0.306 | 0.310 |          |       |  | <i>NAV3</i>      | 1stExon |
| cg14855519 | 8  | 25,898,191  | 4.23E-10 | 0.306 | 0.258 |          |       |  | <i>EBF2</i>      | Body    |
| cg25850808 | 6  | 74,405,048  | 1.33E-12 | 0.306 | 0.308 |          |       |  | <i>CD109</i>     | TSS1500 |
| cg09381178 | 4  | 106,067,367 | 5E-05    | 0.306 | 0.230 |          |       |  | <i>TET2</i>      | TSS1500 |
| cg18559739 | 6  | 4,775,132   | 0.000901 | 0.306 | 0.240 |          |       |  | <i>CDYL</i>      | Body    |
| cg10047572 | 6  | 30,711,399  | 2.93E-21 | 0.306 | 0.287 |          |       |  | <i>IER3</i>      | 3'UTR   |
| cg01576677 | 2  | 45,029,908  | 0.005077 | 0.306 | 0.324 |          |       |  |                  |         |
| cg22425474 | 6  | 29,818,086  | 0.000382 | 0.306 | 0.325 |          |       |  |                  |         |
| cg07870237 | 5  | 131,348,431 | 1.4E-11  | 0.306 | 0.253 |          |       |  | <i>ACSL6</i>     | TSS1500 |
| cg24075113 | 7  | 100,465,289 | 3.91E-75 | 0.306 | 0.306 |          |       |  | <i>TRIP6</i>     | Body    |
| cg26190890 | 6  | 27,107,718  | 1.13E-08 | 0.306 | 0.297 |          |       |  | <i>HIST1H2BK</i> | 3'UTR   |
| cg01534253 | 7  | 28,447,591  | 2.36E-06 | 0.306 | 0.269 |          |       |  | <i>CREB5</i>     | 5'UTR   |
| cg06483432 | 4  | 55,523,233  | 8.73E-09 | 0.306 | 0.332 |          |       |  | <i>KIT</i>       | TSS1500 |
| cg05360477 | 2  | 12,959,313  | 3.85E-06 | 0.306 | 0.359 |          |       |  |                  |         |
| cg09235539 | 1  | 65,730,481  | 1.04E-07 | 0.306 | 0.300 |          |       |  | <i>DNAJC6</i>    | 5'UTR   |
| cg07485357 | 14 | 24,803,679  | 2.83E-05 | 0.306 | 0.332 |          |       |  | <i>ADCY4</i>     | Body    |
| cg13721134 | 8  | 86,350,390  | 3.07E-06 | 0.306 | 0.289 |          |       |  | <i>CA3</i>       | TSS1500 |
| cg17431280 | 19 | 47,507,461  | 0.039382 | 0.306 | 0.239 |          |       |  | <i>GRLF1</i>     | 3'UTR   |
| cg15753746 | 2  | 171,679,591 | 1.44E-06 | 0.306 | 0.314 |          |       |  | <i>GAD1</i>      | Body    |
| cg19042390 | 6  | 166,261,046 | 3.13E-05 | 0.306 | 0.178 |          |       |  |                  |         |
| cg26279668 | 4  | 21,949,853  | 3.16E-05 | 0.306 | 0.208 |          |       |  | <i>KCNIP4</i>    | 5'UTR   |

|            |    |             |          |       |       |  |  |  |                 |         |
|------------|----|-------------|----------|-------|-------|--|--|--|-----------------|---------|
| cg16966315 | 7  | 149,112,318 | 6.72E-08 | 0.306 | 0.298 |  |  |  |                 |         |
| cg17162576 | 1  | 66,999,059  | 8.71E-05 | 0.306 | 0.261 |  |  |  | <i>SGIP1</i>    | TSS1500 |
| cg14480531 | 17 | 55,700,565  | 1.01E-09 | 0.306 | 0.258 |  |  |  | <i>MSI2</i>     | Body    |
| cg00893471 | 2  | 177,029,921 | 5.56E-07 | 0.306 | 0.276 |  |  |  | <i>HOXD3</i>    | 5'UTR   |
| cg20954533 | 5  | 71,462,729  | 1.7E-17  | 0.306 | 0.280 |  |  |  | <i>MAP1B</i>    | Body    |
| cg15845792 | 6  | 28,175,446  | 0.000167 | 0.306 | 0.233 |  |  |  |                 |         |
| cg07727884 | 17 | 19,290,503  | 1.12E-21 | 0.306 | 0.296 |  |  |  | <i>MFAP4</i>    | TSS200  |
| cg06764239 | 1  | 119,544,772 | 3.26E-06 | 0.306 | 0.296 |  |  |  |                 |         |
| cg10604002 | 2  | 131,130,131 | 0.000765 | 0.306 | 0.233 |  |  |  | <i>PTPN18</i>   | Body    |
| cg13744039 | 3  | 184,475,074 | 1.46E-15 | 0.306 | 0.293 |  |  |  |                 |         |
| cg25520679 | 17 | 1,959,121   | 1.95E-05 | 0.306 | 0.257 |  |  |  | <i>HIC1</i>     | TSS1500 |
| cg16915316 | 12 | 58,237,272  | 3.25E-12 | 0.306 | 0.292 |  |  |  | <i>CTDSP2</i>   | Body    |
| cg19918230 | 2  | 219,745,647 | 4.25E-08 | 0.306 | 0.233 |  |  |  | <i>WNT10A</i>   | 1stExon |
| cg25137711 | 1  | 48,059,173  | 3.54E-12 | 0.306 | 0.255 |  |  |  |                 |         |
| cg18575809 | 14 | 21,540,329  | 4.92E-16 | 0.306 | 0.302 |  |  |  | <i>FLJ10357</i> | Body    |
| cg15364169 | 6  | 29,975,080  | 5.37E-05 | 0.306 | 0.332 |  |  |  | <i>HLA-J</i>    | Body    |
| cg04683149 | 8  | 134,203,304 | 1.32E-18 | 0.306 | 0.310 |  |  |  | <i>WISP1</i>    | TSS200  |
| cg22510376 | 5  | 178,957,930 | 0.000123 | 0.306 | 0.226 |  |  |  |                 |         |
| cg27296071 | 20 | 30,458,612  | 0.024111 | 0.306 | 0.124 |  |  |  | <i>TTL9</i>     | 5'UTR   |
| cg06652329 | 12 | 102,874,566 | 4.72E-06 | 0.306 | 0.334 |  |  |  | <i>IGF1</i>     | TSS200  |
| cg06871074 | 1  | 146,551,565 | 6.87E-14 | 0.306 | 0.281 |  |  |  |                 |         |
| cg19735698 | 2  | 23,729,523  | 1.59E-07 | 0.306 | 0.325 |  |  |  | <i>KLHL29</i>   | 5'UTR   |
| cg27357571 | 21 | 34,398,226  | 0.001865 | 0.306 | 0.312 |  |  |  | <i>OLIG2</i>    | TSS200  |
| cg05655001 | 8  | 94,713,206  | 0.00028  | 0.306 | 0.213 |  |  |  | <i>FAM92A1</i>  | Body    |
| cg25246692 | 22 | 37,545,924  | 1.02E-09 | 0.306 | 0.275 |  |  |  | <i>IL2RB</i>    | 5'UTR   |
| cg01218619 | 4  | 25,090,298  | 1.06E-05 | 0.306 | 0.294 |  |  |  |                 |         |
| cg05494467 | 5  | 140,892,308 | 2.89E-10 | 0.306 | 0.231 |  |  |  | <i>PCDHGB5</i>  | 3'UTR   |
| cg08673716 | 3  | 14,852,905  | 0.002512 | 0.306 | 0.383 |  |  |  |                 |         |
| cg06181069 | 1  | 154,293,494 | 2.61E-05 | 0.306 | 0.328 |  |  |  | <i>AQP10</i>    | TSS200  |
| cg08079908 | 2  | 176,997,277 | 4.69E-07 | 0.306 | 0.274 |  |  |  |                 |         |
| cg08794157 | 17 | 15,164,627  | 9.17E-09 | 0.306 | 0.294 |  |  |  | <i>PMP22</i>    | 5'UTR   |
| cg10755235 | 14 | 60,974,039  | 0.000108 | 0.306 | 0.276 |  |  |  |                 |         |
| cg09491410 | 5  | 174,178,884 | 0.011528 | 0.306 | 0.190 |  |  |  |                 |         |
| cg15384589 | 5  | 54,873,393  | 2.23E-11 | 0.306 | 0.305 |  |  |  |                 |         |

|            |    |             |          |       |       |          |       |  |                 |         |
|------------|----|-------------|----------|-------|-------|----------|-------|--|-----------------|---------|
| cg00374492 | 6  | 42,015,867  | 0.000652 | 0.306 | 0.308 |          |       |  | <i>CCND3</i>    | 5'UTR   |
| cg00691123 | 3  | 11,632,974  | 1.16E-10 | 0.306 | 0.247 |          |       |  | <i>VGLL4</i>    | Body    |
| cg17100761 | 7  | 100,318,080 | 0.006951 | 0.306 | 0.224 |          |       |  | <i>EPO</i>      | TSS1500 |
| cg13801416 | 7  | 134,143,919 | 0.003645 | 0.306 | 0.234 | 1.78E-15 | 0.259 |  | <i>AKR1B1</i>   | TSS200  |
| cg03460682 | 2  | 219,646,316 | 0.006513 | 0.306 | 0.222 |          |       |  | <i>CYP27A1</i>  | TSS200  |
| cg09687738 | X  | 113,818,934 | 0.021557 | 0.305 | 0.355 |          |       |  | <i>HTR2C</i>    | 5'UTR   |
| cg18947951 | 2  | 63,285,739  | 3.5E-06  | 0.305 | 0.292 |          |       |  |                 |         |
| cg25207248 | 1  | 110,672,912 | 5.01E-15 | 0.305 | 0.303 |          |       |  |                 |         |
| cg01993208 | 9  | 97,808,906  | 1.48E-13 | 0.305 | 0.311 |          |       |  | <i>C9orf3</i>   | Body    |
| cg08781140 | 17 | 73,584,617  | 2.88E-06 | 0.305 | 0.305 |          |       |  | <i>MYO15B</i>   | Body    |
| cg17965019 | 6  | 27,858,545  | 3.59E-05 | 0.305 | 0.316 | 1.37E-33 | 0.316 |  | <i>HIST1H3J</i> | 1stExon |
| cg21776583 | 6  | 30,923,545  | 0.000589 | 0.305 | 0.341 |          |       |  |                 |         |
| cg25465483 | 3  | 178,432,932 | 3.2E-24  | 0.305 | 0.294 |          |       |  | <i>KCNMB2</i>   | 5'UTR   |
| cg16055185 | 10 | 79,150,517  | 2.76E-10 | 0.305 | 0.267 |          |       |  | <i>KCNMA1</i>   | Body    |
| cg06339573 | 7  | 157,372,262 | 1.61E-20 | 0.305 | 0.273 |          |       |  | <i>PTPRN2</i>   | Body    |
| cg25457832 | 8  | 49,647,579  | 3.79E-07 | 0.305 | 0.240 |          |       |  | <i>EFCAB1</i>   | Body    |
| cg26635219 | 7  | 117,119,424 | 2.04E-06 | 0.305 | 0.312 |          |       |  | <i>CFTR</i>     | TSS1500 |
| cg15241074 | 2  | 12,860,614  | 1.53E-10 | 0.305 | 0.324 |          |       |  | <i>TRIB2</i>    | Body    |
| cg09607488 | 8  | 99,963,657  | 8.07E-10 | 0.305 | 0.276 |          |       |  | <i>OSR2</i>     | Body    |
| cg19142043 | 3  | 29,724,842  | 5.43E-19 | 0.305 | 0.307 |          |       |  | <i>RBMS3</i>    | Body    |
| cg22358236 | 11 | 62,691,452  | 2.74E-06 | 0.305 | 0.286 |          |       |  |                 |         |
| cg00754357 | 1  | 53,019,727  | 4.85E-23 | 0.305 | 0.274 |          |       |  | <i>ZCCHC11</i>  | TSS1500 |
| cg08438690 | 3  | 52,279,403  | 3.95E-20 | 0.305 | 0.287 |          |       |  | <i>PPM1M</i>    | TSS1500 |
| cg05422957 | 4  | 122,873,181 | 0.004578 | 0.305 | 0.155 |          |       |  | <i>TRPC3</i>    | TSS1500 |
| cg20918957 | 3  | 50,275,112  | 1.05E-05 | 0.305 | 0.336 |          |       |  | <i>GNAI2</i>    | Body    |
| cg15076145 | 4  | 94,748,686  | 2.62E-05 | 0.305 | 0.321 |          |       |  | <i>ATOH1</i>    | TSS1500 |
| cg26104143 | 4  | 41,869,579  | 4.07E-06 | 0.305 | 0.260 |          |       |  |                 |         |
| cg13519918 | 12 | 89,748,985  | 1.78E-09 | 0.305 | 0.289 |          |       |  |                 |         |
| cg06093379 | 17 | 44,896,080  | 0.005297 | 0.305 | 0.379 |          |       |  | <i>WNT3</i>     | 5'UTR   |
| cg12934884 | 6  | 28,558,070  | 6.53E-06 | 0.305 | 0.327 |          |       |  |                 |         |
| cg03243226 | 11 | 105,480,979 | 4.24E-06 | 0.305 | 0.322 |          |       |  | <i>GRIA4</i>    | 1stExon |
| cg27231335 | 1  | 95,393,429  | 0.00496  | 0.305 | 0.157 |          |       |  | <i>CNN3</i>     | TSS1500 |
| cg04786857 | 2  | 29,033,897  | 0.006188 | 0.305 | 0.204 | 1.15E-13 | 0.198 |  | <i>SPDYA</i>    | 5'UTR   |
| cg11195797 | 13 | 100,547,331 | 0.000388 | 0.305 | 0.230 |          |       |  | <i>CLYBL</i>    | 3'UTR   |

|            |    |             |          |       |       |          |       |     |  |                     |         |
|------------|----|-------------|----------|-------|-------|----------|-------|-----|--|---------------------|---------|
| cg08755040 | 1  | 180,124,539 | 0.021837 | 0.305 | 0.257 | 5.14E-08 | 0.137 |     |  | <i>QSOX1</i>        | Body    |
| cg14255824 | 9  | 71,795,999  | 2.35E-13 | 0.305 | 0.302 |          |       |     |  | <i>TJP2</i>         | Body    |
| cg17982102 | 18 | 9,707,896   | 3.14E-05 | 0.305 | 0.254 | 5.63E-18 | 0.217 |     |  | <i>RAB31</i>        | TSS1500 |
| cg03149560 | 6  | 29,796,379  | 9.91E-05 | 0.305 | 0.331 |          |       |     |  | <i>HLA-G</i>        | Body    |
| cg00483526 | 12 | 122,907,647 | 4.32E-14 | 0.305 | 0.274 |          |       |     |  | <i>CLIP1</i>        | TSS1500 |
| cg23642747 | 10 | 105,036,645 | 5.36E-09 | 0.305 | 0.344 | 1.27E-19 | 0.187 |     |  | <i>INA</i>          | TSS1500 |
| cg15929797 | 5  | 172,660,796 | 1.19E-06 | 0.305 | 0.317 |          |       |     |  | <i>NKX2-5</i>       | Body    |
| cg12592716 | 7  | 148,395,181 | 0.008584 | 0.305 | 0.136 | 1.02E-07 | 0.082 | Yes |  | <i>CUL1</i>         | TSS1500 |
| cg00918522 | 4  | 175,132,871 | 0.000116 | 0.305 | 0.333 |          |       |     |  |                     |         |
| cg13989852 | 15 | 68,260,324  | 2.56E-18 | 0.305 | 0.272 |          |       |     |  |                     |         |
| cg18550262 | 7  | 72,812,030  | 9.91E-23 | 0.305 | 0.281 |          |       |     |  |                     |         |
| cg22758454 | 17 | 16,570,483  | 7.78E-06 | 0.305 | 0.310 |          |       |     |  |                     |         |
| cg23089825 | 1  | 170,630,558 | 0.000473 | 0.305 | 0.313 |          |       |     |  |                     |         |
| cg18181201 | 1  | 242,686,709 | 0.004907 | 0.305 | 0.159 |          |       |     |  | <i>PLD5</i>         | 5'UTR   |
| cg09975171 | X  | 154,842,841 | 6.96E-05 | 0.305 | 0.187 |          |       |     |  | <i>TMLHE</i>        | TSS1500 |
| cg06130360 | X  | 117,633,362 | 5.56E-08 | 0.305 | 0.306 |          |       |     |  | <i>DOCK11</i>       | Body    |
| cg04701034 | 14 | 52,536,175  | 0.001414 | 0.305 | 0.339 |          |       |     |  | <i>NID2</i>         | TSS1500 |
| cg18034737 | 4  | 188,916,865 | 0.000639 | 0.305 | 0.299 |          |       |     |  | <i>ZFP42</i>        | TSS200  |
| cg25868998 | 13 | 95,655,172  | 0.021958 | 0.305 | 0.146 |          |       |     |  |                     |         |
| cg13912573 | 9  | 92,293,297  | 6.62E-29 | 0.305 | 0.279 |          |       |     |  | <i>LOC100129066</i> | Body    |
| cg15829056 | 1  | 54,856,415  | 2.86E-15 | 0.305 | 0.279 |          |       |     |  | <i>SSBP3</i>        | Body    |
| cg05009389 | 15 | 90,208,810  | 0.043068 | 0.305 | 0.202 |          |       |     |  | <i>PLIN1</i>        | 3'UTR   |
| cg08739651 | 10 | 51,784,888  | 9.36E-09 | 0.305 | 0.250 |          |       |     |  |                     |         |
| cg24776142 | 6  | 16,513,829  | 0.000114 | 0.305 | 0.230 |          |       |     |  | <i>ATXN1</i>        | 5'UTR   |
| cg25950625 | 5  | 41,510,116  | 0.046761 | 0.305 | 0.426 |          |       |     |  | <i>PLCXD3</i>       | Body    |
| cg10146929 | 6  | 26,017,939  | 0.000205 | 0.305 | 0.262 | 7.78E-21 | 0.258 |     |  | <i>HIST1H1A</i>     | 1stExon |
| cg08523343 | 5  | 14,872,934  | 9.39E-05 | 0.305 | 0.229 |          |       |     |  | <i>ANKH</i>         | TSS1500 |
| cg09873164 | 1  | 152,488,093 | 0.020927 | 0.305 | 0.316 |          |       |     |  | <i>CRCT1</i>        | Body    |
| cg18055610 | 6  | 30,095,419  | 7.21E-06 | 0.305 | 0.318 |          |       |     |  |                     |         |
| cg23395749 | 5  | 176,984,246 | 0.000102 | 0.305 | 0.264 |          |       |     |  |                     |         |
| cg13065206 | 15 | 41,062,017  | 5.36E-13 | 0.305 | 0.302 |          |       |     |  | <i>DNAJC17</i>      | Body    |
| cg21342910 | 17 | 48,042,779  | 4.47E-06 | 0.305 | 0.366 |          |       |     |  |                     |         |
| cg22956060 | 3  | 9,289,747   | 4.55E-07 | 0.305 | 0.197 |          |       |     |  | <i>SRGAP3</i>       | Body    |
| cg04829853 | 15 | 89,438,208  | 0.001447 | 0.305 | 0.373 |          |       |     |  | <i>HAPLN3</i>       | 5'UTR   |

|            |    |             |          |       |       |         |       |  |                 |         |
|------------|----|-------------|----------|-------|-------|---------|-------|--|-----------------|---------|
| cg22008625 | 8  | 10,588,386  | 0.011295 | 0.305 | 0.200 |         |       |  | <i>SOX7</i>     | TSS1500 |
| cg03383941 | 20 | 44,099,418  | 0.017366 | 0.305 | 0.198 |         |       |  | <i>WFDC2</i>    | Body    |
| cg17399545 | 12 | 88,972,226  | 1.78E-15 | 0.305 | 0.288 |         |       |  | <i>KITLG</i>    | Body    |
| cg17800442 | 16 | 30,908,233  | 0.006358 | 0.305 | 0.361 | 1.5E-18 | 0.228 |  | <i>CTF1</i>     | Body    |
| cg19870698 | 14 | 95,239,570  | 0.011335 | 0.305 | 0.330 |         |       |  |                 |         |
| cg09478396 | 7  | 140,339,480 | 5.37E-06 | 0.305 | 0.307 |         |       |  |                 |         |
| cg04878000 | 1  | 32,237,923  | 3.91E-05 | 0.305 | 0.323 |         |       |  |                 |         |
| cg12101586 | 15 | 75,019,203  | 1.12E-16 | 0.305 | 0.299 |         |       |  | <i>CYP1A1</i>   | TSS1500 |
| cg20039048 | 11 | 8,305,302   | 7.93E-10 | 0.305 | 0.306 |         |       |  |                 |         |
| cg22222461 | 8  | 98,000,885  | 3.63E-09 | 0.305 | 0.282 |         |       |  | <i>PGCP</i>     | Body    |
| cg18235000 | 8  | 26,372,829  | 8.76E-05 | 0.305 | 0.257 |         |       |  | <i>PNMA2</i>    | TSS1500 |
| cg22698272 | 1  | 221,054,615 | 4.93E-13 | 0.305 | 0.309 |         |       |  | <i>HLX</i>      | Body    |
| cg02713832 | 11 | 60,772,559  | 4.15E-12 | 0.304 | 0.278 |         |       |  | <i>CD6</i>      | Body    |
| cg19760241 | 17 | 35,300,010  | 1.92E-05 | 0.304 | 0.311 |         |       |  | <i>LHX1</i>     | Body    |
| cg09813276 | X  | 100,805,521 | 0.043257 | 0.304 | 0.162 |         |       |  | <i>ARMCX1</i>   | 1stExon |
| cg04358214 | 16 | 67,143,304  | 3.71E-05 | 0.304 | 0.282 |         |       |  | <i>C16orf70</i> | TSS1500 |
| cg25216704 | 4  | 3,485,393   | 2.23E-10 | 0.304 | 0.302 |         |       |  | <i>DOK7</i>     | Body    |
| cg00036011 | 6  | 26,271,718  | 0.007825 | 0.304 | 0.330 |         |       |  | <i>HIST1H3G</i> | TSS200  |
| cg08189989 | 2  | 105,459,164 | 0.025478 | 0.304 | 0.401 |         |       |  |                 |         |
| cg00184203 | 2  | 187,558,402 | 6.62E-05 | 0.304 | 0.213 |         |       |  | <i>FAM171B</i>  | TSS1500 |
| cg01451808 | 8  | 49,676,562  | 3.07E-15 | 0.304 | 0.279 |         |       |  |                 |         |
| cg27405791 | 4  | 41,882,953  | 0.000555 | 0.304 | 0.312 |         |       |  |                 |         |
| cg04582364 | 5  | 52,778,441  | 7.34E-05 | 0.304 | 0.224 |         |       |  | <i>FST</i>      | Body    |
| cg27365825 | 2  | 18,059,130  | 0.001447 | 0.304 | 0.223 |         |       |  | <i>KCNS3</i>    | TSS1500 |
| cg25060829 | 6  | 28,367,571  | 0.002848 | 0.304 | 0.282 |         |       |  | <i>ZSCAN12</i>  | TSS200  |
| cg14511698 | 14 | 60,976,898  | 4.74E-08 | 0.304 | 0.309 |         |       |  | <i>SIX6</i>     | Body    |
| cg25324047 | 10 | 22,765,840  | 4.05E-08 | 0.304 | 0.334 |         |       |  |                 |         |
| cg13910046 | 12 | 25,538,221  | 5.73E-05 | 0.304 | 0.197 |         |       |  |                 |         |
| cg14409958 | 8  | 120,651,652 | 5.84E-05 | 0.304 | 0.341 | 4.2E-18 | 0.153 |  | <i>ENPP2</i>    | TSS1500 |
| cg12054869 | 13 | 33,001,250  | 0.001284 | 0.304 | 0.196 |         |       |  | <i>N4BP2L1</i>  | Body    |
| cg01287054 | 7  | 156,795,156 | 0.000354 | 0.304 | 0.256 |         |       |  |                 |         |
| cg13892570 | 1  | 159,893,182 | 1.87E-07 | 0.304 | 0.278 |         |       |  | <i>TAGLN2</i>   | 5'UTR   |
| cg16405012 | 12 | 5,542,395   | 0.001482 | 0.304 | 0.299 |         |       |  | <i>NTF3</i>     | Body    |
| cg22982093 | 17 | 41,669,401  | 8.98E-26 | 0.304 | 0.292 |         |       |  |                 |         |

|            |    |             |          |       |       |          |       |  |                  |         |
|------------|----|-------------|----------|-------|-------|----------|-------|--|------------------|---------|
| cg18790597 | 4  | 17,783,331  | 0.002252 | 0.304 | 0.290 |          |       |  | <i>FAM184B</i>   | TSS200  |
| cg14093715 | 9  | 126,776,180 | 6.54E-08 | 0.304 | 0.289 |          |       |  | <i>LHX2</i>      | Body    |
| cg19619003 | 1  | 41,846,758  | 6.6E-05  | 0.304 | 0.159 |          |       |  |                  |         |
| cg23493412 | 17 | 63,491,688  | 1E-10    | 0.304 | 0.287 |          |       |  |                  |         |
| cg05725004 | 1  | 76,082,568  | 3.66E-08 | 0.304 | 0.234 |          |       |  |                  |         |
| cg21872764 | 22 | 19,510,977  | 6.49E-05 | 0.304 | 0.317 |          |       |  | <i>CLDN5</i>     | 1stExon |
| cg10445315 | 21 | 38,066,047  | 0.005961 | 0.304 | 0.331 |          |       |  |                  |         |
| cg23396786 | 2  | 73,299,151  | 0.000958 | 0.304 | 0.233 |          |       |  | <i>SFXN5</i>     | TSS200  |
| cg27369013 | 2  | 219,472,724 | 0.002532 | 0.304 | 0.238 |          |       |  | <i>PLCD4</i>     | 1stExon |
| cg04138112 | 1  | 167,090,618 | 0.00664  | 0.304 | 0.185 |          |       |  | <i>DUSP27</i>    | Body    |
| cg19856273 | 1  | 46,668,472  | 1.58E-14 | 0.304 | 0.314 |          |       |  | <i>C1orf190</i>  | TSS1500 |
| cg21096399 | 11 | 119,188,145 | 2.93E-19 | 0.304 | 0.299 | 2.45E-30 | 0.229 |  | <i>MCAM</i>      | TSS1500 |
| cg04641171 | 15 | 79,381,805  | 1.04E-05 | 0.304 | 0.301 |          |       |  | <i>RASGRF1</i>   | Body    |
| cg08121925 | 3  | 180,588,041 | 6.9E-05  | 0.304 | 0.208 |          |       |  |                  |         |
| cg10334741 | 11 | 128,321,749 | 2.28E-13 | 0.304 | 0.301 |          |       |  |                  |         |
| cg04159905 | 5  | 691,354     | 4.2E-10  | 0.304 | 0.307 |          |       |  | <i>TPPP</i>      | 5'UTR   |
| cg27640794 | 4  | 169,555,699 | 1.86E-10 | 0.304 | 0.297 |          |       |  | <i>PALLD</i>     | 5'UTR   |
| cg10184889 | 8  | 86,350,919  | 0.000107 | 0.304 | 0.300 |          |       |  | <i>CA3</i>       | TSS200  |
| cg14374337 | 14 | 75,446,498  | 1.34E-20 | 0.304 | 0.284 |          |       |  |                  |         |
| cg11525280 | 2  | 26,624,667  | 0.045576 | 0.304 | 0.079 |          |       |  | <i>C2orf39</i>   | TSS200  |
| cg26848524 | 8  | 55,294,566  | 1.19E-05 | 0.304 | 0.280 |          |       |  |                  |         |
| cg21007342 | 14 | 94,917,627  | 6.24E-10 | 0.304 | 0.290 |          |       |  | <i>SERPINA11</i> | 5'UTR   |
| cg13966628 | 1  | 240,629,046 | 8.79E-07 | 0.304 | 0.304 |          |       |  | <i>FMN2</i>      | Body    |
| cg14159342 | 1  | 3,624,292   | 1.58E-09 | 0.304 | 0.286 |          |       |  | <i>TP73</i>      | Body    |
| cg19484420 | 2  | 127,414,108 | 0.030805 | 0.304 | 0.417 |          |       |  | <i>GYPC</i>      | Body    |
| cg04317962 | 16 | 79,623,625  | 1.04E-09 | 0.304 | 0.270 |          |       |  |                  |         |
| cg19500479 | 2  | 20,865,674  | 0.000106 | 0.304 | 0.288 |          |       |  | <i>GDF7</i>      | TSS1500 |
| cg10883284 | 6  | 27,059,715  | 0.007837 | 0.304 | 0.256 |          |       |  |                  |         |
| cg08214995 | 16 | 22,826,243  | 7.12E-07 | 0.304 | 0.257 |          |       |  | <i>HS3ST2</i>    | 1stExon |
| cg24110050 | 1  | 67,217,853  | 1.4E-05  | 0.304 | 0.267 | 1.42E-15 | 0.188 |  | <i>TCTEX1D1</i>  | TSS1500 |
| cg22546374 | 6  | 27,301,172  | 1.35E-06 | 0.304 | 0.314 |          |       |  |                  |         |
| cg22792176 | 10 | 130,274,452 | 0.000136 | 0.304 | 0.234 |          |       |  |                  |         |
| cg18395327 | 2  | 220,379,109 | 0.041523 | 0.304 | 0.303 |          |       |  | <i>ACCN4</i>     | 1stExon |
| cg24902339 | 10 | 119,867,927 | 8.92E-09 | 0.304 | 0.246 |          |       |  | <i>CASC2</i>     | Body    |



|            |    |             |          |       |       |          |       |  |                 |         |
|------------|----|-------------|----------|-------|-------|----------|-------|--|-----------------|---------|
| cg08384999 | X  | 40,004,346  | 3.29E-07 | 0.304 | 0.214 |          |       |  | <i>BCOR</i>     | 5'UTR   |
| cg05187508 | 6  | 29,974,306  | 2.66E-08 | 0.304 | 0.296 |          |       |  | <i>HLA-J</i>    | Body    |
| cg01649773 | 11 | 27,015,991  | 3.68E-18 | 0.304 | 0.301 |          |       |  | <i>FIBIN</i>    | 5'UTR   |
| cg09723635 | 6  | 17,866,039  | 5.95E-22 | 0.304 | 0.309 |          |       |  | <i>KIF13A</i>   | Body    |
| cg17807172 | 5  | 122,620,929 | 2.25E-05 | 0.304 | 0.308 |          |       |  |                 |         |
| cg00178511 | 3  | 48,632,778  | 0.008415 | 0.304 | 0.330 |          |       |  | <i>COL7A1</i>   | TSS200  |
| cg06630799 | 20 | 55,203,840  | 0.000324 | 0.304 | 0.241 |          |       |  | <i>TFAP2C</i>   | TSS1500 |
| cg05211836 | 19 | 16,999,576  | 3.25E-06 | 0.304 | 0.327 |          |       |  | <i>F2RL3</i>    | TSS1500 |
| cg00577935 | 5  | 112,073,348 | 0.006154 | 0.304 | 0.154 |          |       |  | <i>APC</i>      | TSS1500 |
| cg01244015 | 2  | 225,266,843 | 0.014238 | 0.304 | 0.352 |          |       |  | <i>FAM124B</i>  | TSS200  |
| cg02381898 | 4  | 54,970,175  | 2.71E-05 | 0.304 | 0.294 |          |       |  |                 |         |
| cg18769074 | 3  | 133,464,867 | 1.1E-07  | 0.304 | 0.239 |          |       |  | <i>TF</i>       | TSS200  |
| cg06774787 | X  | 56,258,973  | 9E-08    | 0.304 | 0.270 |          |       |  | <i>KLF8</i>     | 5'UTR   |
| cg07366670 | 12 | 111,619,077 | 0.009681 | 0.304 | 0.188 |          |       |  | <i>CUX2</i>     | Body    |
| cg24389412 | X  | 70,323,743  | 1.9E-11  | 0.304 | 0.300 |          |       |  | <i>CXorf65</i>  | Body    |
| cg24495017 | 5  | 134,370,530 | 4.25E-15 | 0.304 | 0.290 | 1.66E-30 | 0.213 |  | <i>PITX1</i>    | TSS1500 |
| cg25143990 | 12 | 28,127,783  | 2.29E-06 | 0.304 | 0.311 |          |       |  |                 |         |
| cg20252022 | 12 | 77,272,172  | 0.001007 | 0.304 | 0.156 |          |       |  | <i>CSRP2</i>    | 5'UTR   |
| cg21131024 | 8  | 104,153,643 | 5.48E-07 | 0.304 | 0.298 |          |       |  | <i>C8orf56</i>  | TSS200  |
| cg13714026 | 10 | 73,385,503  | 2.15E-23 | 0.304 | 0.301 |          |       |  | <i>CDH23</i>    | Body    |
| cg20215212 | 17 | 28,618,041  | 6.72E-11 | 0.304 | 0.302 |          |       |  | <i>BLMH</i>     | Body    |
| cg05692123 | 5  | 122,620,950 | 5.74E-06 | 0.304 | 0.302 |          |       |  |                 |         |
| cg26822438 | X  | 119,134,368 | 7.73E-06 | 0.304 | 0.281 |          |       |  |                 |         |
| cg03705784 | 11 | 95,888,212  | 4.15E-20 | 0.304 | 0.287 |          |       |  | <i>MAML2</i>    | Body    |
| cg09756225 | 7  | 73,894,999  | 0.001946 | 0.304 | 0.245 |          |       |  | <i>GTF2IRD1</i> | 5'UTR   |
| cg25260543 | 7  | 100,946,792 | 5.35E-06 | 0.304 | 0.255 |          |       |  |                 |         |
| cg11325273 | 13 | 36,642,977  | 1.71E-15 | 0.304 | 0.328 |          |       |  | <i>DCLK1</i>    | Body    |
| cg09567485 | 16 | 67,203,753  | 0.001316 | 0.304 | 0.394 |          |       |  | <i>HSF4</i>     | 3'UTR   |
| cg21996227 | 1  | 156,130,826 | 1.71E-06 | 0.304 | 0.298 |          |       |  | <i>SEMA4A</i>   | Body    |
| cg04649530 | 9  | 132,113,372 | 6.72E-19 | 0.304 | 0.273 |          |       |  |                 |         |
| cg20859731 | 20 | 36,226,820  | 1.16E-05 | 0.304 | 0.331 |          |       |  |                 |         |
| cg22356428 | 1  | 206,687,071 | 5.1E-22  | 0.304 | 0.295 |          |       |  | <i>RASSF5</i>   | Body    |
| cg13569051 | 9  | 124,051,703 | 7.14E-25 | 0.304 | 0.296 |          |       |  | <i>GSN</i>      | 5'UTR   |
| cg05297854 | 22 | 50,623,687  | 4.78E-05 | 0.304 | 0.293 |          |       |  | <i>TRABD</i>    | TSS1500 |

|            |    |             |          |       |       |           |       |     |                 |         |
|------------|----|-------------|----------|-------|-------|-----------|-------|-----|-----------------|---------|
| cg21425842 | 6  | 26,240,939  | 0.000741 | 0.304 | 0.295 |           |       |     | <i>HIST1H4F</i> | 1stExon |
| cg11239720 | 4  | 152,967,415 | 1.01E-08 | 0.304 | 0.272 |           |       |     |                 |         |
| cg19502359 | 11 | 72,912,441  | 6.26E-16 | 0.304 | 0.287 |           |       |     |                 |         |
| cg20972214 | 12 | 8,088,818   | 4.35E-05 | 0.303 | 0.304 | 1.71E-30  | 0.217 |     | <i>SLC2A3</i>   | 1stExon |
| cg05809668 | 7  | 35,301,188  | 0.015078 | 0.303 | 0.296 |           |       |     |                 |         |
| cg13413955 | 9  | 842,914     | 8.24E-07 | 0.303 | 0.270 |           |       |     | <i>DMRT1</i>    | Body    |
| cg22738219 | 10 | 13,043,313  | 7.33E-06 | 0.303 | 0.276 |           |       |     | <i>CCDC3</i>    | 1stExon |
| cg16481332 | 7  | 2,654,053   | 3.97E-08 | 0.303 | 0.265 |           |       |     | <i>IQCE</i>     | 3'UTR   |
| cg20536041 | 2  | 45,029,004  | 0.002884 | 0.303 | 0.304 |           |       |     |                 |         |
| cg05840412 | 13 | 49,145,436  | 2.05E-06 | 0.303 | 0.251 |           |       |     |                 |         |
| cg12988117 | 7  | 51,658,747  | 7.9E-13  | 0.303 | 0.306 |           |       |     |                 |         |
| cg25513924 | 3  | 187,009,486 | 4.07E-09 | 0.303 | 0.306 |           |       | Yes | <i>MASP1</i>    | 5'UTR   |
| cg11969002 | 6  | 30,712,282  | 0.016698 | 0.303 | 0.297 |           |       |     | <i>IER3</i>     | 1stExon |
| cg20045320 | 11 | 319,555     | 6.26E-07 | 0.303 | 0.208 |           |       |     |                 |         |
| cg04529938 | 17 | 73,084,494  | 1.29E-17 | 0.303 | 0.276 |           |       |     | <i>SLC16A5</i>  | 5'UTR   |
| cg08047457 | 3  | 50,378,413  | 4.44E-06 | 0.303 | 0.292 | 1.89E-08  | 0.123 |     | <i>RASSF1</i>   | TSS200  |
| cg13448197 | 10 | 43,846,281  | 0.007895 | 0.303 | 0.187 |           |       |     |                 |         |
| cg26040816 | 20 | 42,816,135  | 2.25E-07 | 0.303 | 0.220 |           |       |     | <i>JPH2</i>     | 1stExon |
| cg21216015 | 1  | 26,230,906  | 5.16E-15 | 0.303 | 0.281 |           |       |     | <i>STMN1</i>    | Body    |
| cg17936721 | 5  | 77,140,543  | 0.002955 | 0.303 | 0.319 |           |       |     |                 |         |
| cg04119462 | 16 | 2,415,808   | 5.48E-09 | 0.303 | 0.297 |           |       |     | <i>ABCA17P</i>  | Body    |
| cg05285244 | 7  | 149,412,760 | 1.45E-08 | 0.303 | 0.203 |           |       |     | <i>KRBA1</i>    | 5'UTR   |
| cg10508993 | 5  | 180,018,495 | 4.7E-130 | 0.303 | 0.302 |           |       |     | <i>SCGB3A1</i>  | TSS200  |
| cg21971621 | 11 | 65,600,773  | 3.54E-07 | 0.303 | 0.304 |           |       |     | <i>SNX32</i>    | TSS1500 |
| cg27558693 | 1  | 85,710,632  | 0.000422 | 0.303 | 0.282 |           |       |     |                 |         |
| cg03884132 | 15 | 33,009,531  | 0.017859 | 0.303 | 0.317 |           |       |     | <i>GREM1</i>    | TSS1500 |
| cg08802841 | 12 | 89,748,726  | 3.15E-11 | 0.303 | 0.288 |           |       |     |                 |         |
| cg04881103 | 1  | 32,410,413  | 1.49E-06 | 0.303 | 0.267 |           |       |     |                 |         |
| cg13207333 | 6  | 29,974,798  | 1.09E-10 | 0.303 | 0.285 |           |       |     | <i>HLA-J</i>    | Body    |
| cg13864794 | 7  | 16,505,664  | 0.000643 | 0.303 | 0.348 |           |       |     | <i>SOSTDC1</i>  | TSS200  |
| cg10148280 | 3  | 148,846,750 | 1.21E-05 | 0.303 | 0.255 | 0.0000047 | 0.112 |     | <i>HPS3</i>     | TSS1500 |
| cg13620051 | 9  | 126,759,535 | 0.000484 | 0.303 | 0.343 |           |       |     |                 |         |
| cg18612255 | 12 | 1,770,715   | 1.04E-07 | 0.303 | 0.283 |           |       |     |                 |         |
| cg19934381 | 17 | 80,944,090  | 2.05E-16 | 0.303 | 0.277 |           |       |     | <i>B3GNTL1</i>  | Body    |

|            |    |             |          |       |       |          |       |     |                |         |
|------------|----|-------------|----------|-------|-------|----------|-------|-----|----------------|---------|
| cg26271045 | 2  | 238,535,754 | 0.000122 | 0.303 | 0.236 |          |       |     | <i>LRRFIP1</i> | TSS1500 |
| cg10372921 | 15 | 74,218,733  | 1.37E-30 | 0.303 | 0.294 |          |       |     | <i>LOXL1</i>   | TSS200  |
| cg14328457 | 17 | 37,381,475  | 0.002024 | 0.303 | 0.360 |          |       |     | <i>STAC2</i>   | Body    |
| cg03257172 | 1  | 200,010,283 | 0.016325 | 0.303 | 0.383 |          |       |     | <i>NR5A2</i>   | Body    |
| cg06520003 | 17 | 48,504,157  | 2.83E-13 | 0.303 | 0.300 |          |       |     | <i>ACSF2</i>   | Body    |
| cg05644921 | 4  | 141,489,114 | 0.001096 | 0.303 | 0.258 |          |       |     | <i>UCP1</i>    | Body    |
| cg23808165 | 22 | 25,421,713  | 2.16E-18 | 0.303 | 0.310 |          |       |     |                |         |
| cg22851295 | 6  | 10,881,949  | 7.9E-26  | 0.303 | 0.282 |          |       |     | <i>GCM2</i>    | 1stExon |
| cg00286102 | 20 | 61,047,376  | 0.012591 | 0.303 | 0.137 |          |       | Yes | <i>GATA5</i>   | Body    |
| cg09122035 | 11 | 319,667     | 2.41E-06 | 0.303 | 0.248 |          |       |     |                |         |
| cg16985778 | 1  | 32,708,234  | 3.98E-13 | 0.303 | 0.295 |          |       |     | <i>MTMR9L</i>  | TSS1500 |
| cg15876825 | 3  | 11,651,881  | 9.95E-15 | 0.303 | 0.275 |          |       |     | <i>VGLL4</i>   | Body    |
| cg26331172 | 1  | 151,118,299 | 3.83E-11 | 0.303 | 0.302 |          |       |     | <i>SEMA6C</i>  | 5'UTR   |
| cg26877596 | 12 | 106,534,217 | 1.05E-16 | 0.303 | 0.289 |          |       |     | <i>NUAK1</i>   | TSS1500 |
| cg17602451 | 18 | 60,985,645  | 0.003207 | 0.303 | 0.330 | 1.29E-10 | 0.188 |     | <i>BCL2</i>    | Body    |
| cg22070991 | 4  | 4,856,904   | 0.002096 | 0.303 | 0.277 |          |       |     |                |         |
| cg24341129 | 9  | 16,727,830  | 1.72E-23 | 0.303 | 0.264 | 8.29E-27 | 0.218 |     | <i>BNC2</i>    | Body    |
| cg25117600 | 4  | 10,023,201  | 8.39E-11 | 0.303 | 0.289 |          |       |     | <i>SLC2A9</i>  | TSS200  |
| cg09143673 | 5  | 172,664,439 | 4.14E-06 | 0.303 | 0.294 |          |       |     |                |         |
| cg18946226 | 13 | 109,248,503 | 1.08E-08 | 0.303 | 0.209 | 2.17E-27 | 0.257 |     | <i>MYO16</i>   | 5'UTR   |
| cg13203394 | 12 | 26,951,217  | 1.01E-08 | 0.303 | 0.319 |          |       |     | <i>ITPR2</i>   | Body    |
| cg26055054 | X  | 134,654,347 | 0.001202 | 0.303 | 0.190 |          |       |     | <i>DDX26B</i>  | TSS1500 |
| cg09151979 | 6  | 28,457,624  | 0.018209 | 0.303 | 0.329 |          |       |     |                |         |
| cg18792146 | 1  | 235,105,751 | 3.62E-11 | 0.303 | 0.259 |          |       |     |                |         |
| cg01763453 | 16 | 81,764,614  | 6.09E-13 | 0.303 | 0.278 |          |       |     |                |         |
| cg09142313 | 5  | 72,677,859  | 8.21E-08 | 0.303 | 0.303 |          |       |     |                |         |
| cg02254461 | 3  | 39,195,904  | 7.28E-17 | 0.303 | 0.306 | 3.3E-33  | 0.320 |     | <i>CSRNP1</i>  | TSS1500 |
| cg10484211 | 1  | 218,547,935 | 1.67E-05 | 0.303 | 0.268 |          |       |     | <i>TGFB2</i>   | Body    |
| cg07029873 | 1  | 217,311,014 | 3.81E-06 | 0.303 | 0.295 |          |       |     | <i>ESRRG</i>   | 1stExon |
| cg21120951 | 4  | 152,611,527 | 1.83E-15 | 0.303 | 0.307 |          |       | Yes | <i>PET112L</i> | Body    |
| cg17619311 | 3  | 42,947,565  | 0.007883 | 0.303 | 0.212 |          |       |     | <i>ZNF662</i>  | TSS200  |
| cg09537620 | 11 | 31,826,574  | 0.000153 | 0.303 | 0.296 |          |       |     | <i>PAX6</i>    | Body    |
| cg08235220 | 8  | 40,835,933  | 5.7E-14  | 0.303 | 0.295 |          |       |     |                |         |
| cg11920449 | 6  | 36,645,608  | 1.43E-07 | 0.303 | 0.320 |          |       |     | <i>CDKN1A</i>  | TSS1500 |

|            |    |             |          |       |       |            |       |  |                   |         |
|------------|----|-------------|----------|-------|-------|------------|-------|--|-------------------|---------|
| cg25558103 | 17 | 42,835,859  | 6.96E-09 | 0.303 | 0.309 |            |       |  | <i>ADAM11</i>     | TSS1500 |
| cg25883066 | 8  | 127,647,405 | 4E-27    | 0.303 | 0.295 |            |       |  |                   |         |
| cg06096336 | 2  | 231,989,800 | 0.001573 | 0.303 | 0.255 | 0.00680158 | 0.070 |  | <i>PSMD1</i>      | Body    |
| cg13470462 | 3  | 112,965,787 | 3.37E-12 | 0.303 | 0.305 |            |       |  | <i>BOC</i>        | 5'UTR   |
| cg17754510 | 6  | 10,391,412  | 0.000161 | 0.303 | 0.314 |            |       |  |                   |         |
| cg19751300 | 18 | 44,336,399  | 2.51E-06 | 0.303 | 0.277 | 7.2E-19    | 0.173 |  | <i>ST8SIA5</i>    | 1stExon |
| cg18949886 | X  | 3,265,318   | 0.00031  | 0.303 | 0.280 |            |       |  | <i>MXRA5</i>      | TSS1500 |
| cg07134230 | 1  | 156,631,248 | 0.001196 | 0.303 | 0.379 |            |       |  |                   |         |
| cg05234415 | 19 | 38,743,744  | 1.64E-31 | 0.303 | 0.281 |            |       |  | <i>PPP1R14A</i>   | Body    |
| cg11722971 | 2  | 1,286,544   | 6.02E-05 | 0.303 | 0.195 |            |       |  | <i>SNTG2</i>      | Body    |
| cg08247397 | 19 | 4,607,146   | 0.020267 | 0.303 | 0.219 |            |       |  |                   |         |
| cg26248173 | 1  | 166,853,578 | 0.02369  | 0.303 | 0.191 |            |       |  |                   |         |
| cg18355902 | 4  | 154,681,128 | 0.002409 | 0.303 | 0.355 |            |       |  | <i>RNF175</i>     | 5'UTR   |
| cg00188748 | 9  | 130,564,509 | 4.05E-17 | 0.303 | 0.282 |            |       |  | <i>FPGS</i>       | TSS1500 |
| cg09767126 | 8  | 103,877,365 | 1.96E-06 | 0.303 | 0.306 |            |       |  | <i>AZIN1</i>      | TSS1500 |
| cg18496653 | 21 | 38,593,042  | 0.037703 | 0.302 | 0.154 |            |       |  |                   |         |
| cg00338391 | 7  | 1,283,981   | 0.000145 | 0.302 | 0.313 |            |       |  |                   |         |
| cg24025550 | 15 | 59,157,523  | 3.95E-08 | 0.302 | 0.305 |            |       |  |                   |         |
| cg00249511 | 11 | 627,152     | 4.68E-05 | 0.302 | 0.309 |            |       |  | <i>SCT</i>        | 5'UTR   |
| cg16283183 | 3  | 45,718,805  | 6.79E-07 | 0.302 | 0.285 |            |       |  | <i>LIMD1</i>      | 3'UTR   |
| cg06374079 | 6  | 27,182,908  | 0.009229 | 0.302 | 0.319 |            |       |  |                   |         |
| cg06985993 | 16 | 30,040,055  | 9.19E-08 | 0.302 | 0.282 |            |       |  | <i>FAM57B</i>     | Body    |
| cg04208434 | 3  | 129,513,427 | 3.9E-08  | 0.302 | 0.269 |            |       |  | <i>TMCC1</i>      | Body    |
| cg08323075 | 4  | 5,053,504   | 0.037314 | 0.302 | 0.183 |            |       |  | <i>STK32B</i>     | TSS200  |
| cg15084851 | 1  | 36,317,380  | 5.66E-16 | 0.302 | 0.324 |            |       |  | <i>EIF2C4</i>     | Body    |
| cg07471614 | 8  | 125,855,152 | 1.8E-22  | 0.302 | 0.300 |            |       |  |                   |         |
| cg17326090 | 22 | 28,198,472  | 9.8E-12  | 0.302 | 0.319 |            |       |  | <i>MN1</i>        | TSS1500 |
| cg25216196 | 17 | 19,290,520  | 1.63E-19 | 0.302 | 0.291 |            |       |  | <i>MFAP4</i>      | TSS200  |
| cg26783727 | 16 | 67,204,807  | 1.3E-12  | 0.302 | 0.310 |            |       |  |                   |         |
| cg04376312 | 3  | 123,602,485 | 1.85E-12 | 0.302 | 0.291 | 9.19E-31   | 0.213 |  | <i>MYLK</i>       | 5'UTR   |
| cg23125200 | 13 | 20,806,732  | 0.002513 | 0.302 | 0.218 |            |       |  | <i>GJB6</i>       | TSS200  |
| cg19256731 | 20 | 1,874,527   | 1.68E-09 | 0.302 | 0.317 |            |       |  | <i>SIRPA</i>      | TSS1500 |
| cg17968795 | 2  | 99,553,406  | 4.32E-05 | 0.302 | 0.314 |            |       |  | <i>C2orf55</i>    | TSS1500 |
| cg02639927 | 1  | 77,334,748  | 2.24E-05 | 0.302 | 0.294 |            |       |  | <i>ST6GALNAC5</i> | Body    |

|            |    |             |          |       |       |  |  |  |                  |         |
|------------|----|-------------|----------|-------|-------|--|--|--|------------------|---------|
| cg17296482 | 12 | 4,382,188   | 0.000117 | 0.302 | 0.287 |  |  |  | <i>CCND2</i>     | TSS1500 |
| cg01678309 | 15 | 68,930,255  | 2.23E-08 | 0.302 | 0.249 |  |  |  | <i>CORO2B</i>    | Body    |
| cg07676859 | 20 | 23,015,932  | 0.001079 | 0.302 | 0.187 |  |  |  | <i>SSTR4</i>     | TSS200  |
| cg16389901 | 14 | 54,423,807  | 0.000219 | 0.302 | 0.253 |  |  |  | <i>BMP4</i>      | TSS1500 |
| cg12439852 | 7  | 16,627,383  | 2.21E-09 | 0.302 | 0.271 |  |  |  |                  |         |
| cg20658100 | 13 | 74,707,145  | 0.015711 | 0.302 | 0.350 |  |  |  | <i>KLF12</i>     | 5'UTR   |
| cg24154839 | 4  | 46,995,741  | 8.32E-11 | 0.302 | 0.325 |  |  |  | <i>GABRA4</i>    | TSS200  |
| cg11165158 | 16 | 86,613,094  | 9.56E-10 | 0.302 | 0.279 |  |  |  | <i>FOXL1</i>     | 1stExon |
| cg22492099 | 15 | 43,414,974  | 4.04E-12 | 0.302 | 0.287 |  |  |  |                  |         |
| cg08075452 | 3  | 184,056,843 | 9.2E-16  | 0.302 | 0.292 |  |  |  | <i>FAM131A</i>   | 5'UTR   |
| cg08201451 | 16 | 70,760,142  | 6.59E-20 | 0.302 | 0.287 |  |  |  | <i>VAC14</i>     | Body    |
| cg03208951 | 19 | 48,828,835  | 0.026198 | 0.302 | 0.265 |  |  |  | <i>EMP3</i>      | 1stExon |
| cg00252282 | 12 | 5,542,736   | 2.53E-05 | 0.302 | 0.270 |  |  |  | <i>NTF3</i>      | Body    |
| cg04175292 | 6  | 44,187,226  | 0.014604 | 0.302 | 0.228 |  |  |  | <i>SLC29A1</i>   | TSS200  |
| cg25790133 | 4  | 2,627,014   | 5.46E-27 | 0.302 | 0.287 |  |  |  | <i>FAM193A</i>   | TSS200  |
| cg18438124 | 1  | 21,996,315  | 0.008377 | 0.302 | 0.283 |  |  |  | <i>RAP1GAP</i>   | TSS1500 |
| cg03089717 | 6  | 28,557,411  | 0.001593 | 0.302 | 0.248 |  |  |  |                  |         |
| cg11533881 | 6  | 29,894,322  | 3.19E-08 | 0.302 | 0.301 |  |  |  | <i>HCG4P6</i>    | TSS1500 |
| cg02300652 | 2  | 152,804,107 | 4.4E-10  | 0.302 | 0.236 |  |  |  | <i>CACNB4</i>    | Body    |
| cg06707286 | 15 | 102,010,195 | 5.73E-14 | 0.302 | 0.284 |  |  |  | <i>PCSK6</i>     | Body    |
| cg17037963 | 12 | 30,949,050  | 0.001513 | 0.302 | 0.268 |  |  |  |                  |         |
| cg14507337 | 14 | 60,978,161  | 0.000117 | 0.302 | 0.301 |  |  |  | <i>SIX6</i>      | 3'UTR   |
| cg24913825 | 2  | 198,134,173 | 2.75E-14 | 0.302 | 0.312 |  |  |  |                  |         |
| cg24946597 | 8  | 31,497,464  | 0.014426 | 0.302 | 0.245 |  |  |  | <i>NRG1</i>      | 5'UTR   |
| cg25074493 | 2  | 131,186,495 | 1.01E-14 | 0.302 | 0.295 |  |  |  |                  |         |
| cg05085230 | 6  | 133,562,461 | 0.002856 | 0.302 | 0.378 |  |  |  | <i>EYA4</i>      | TSS200  |
| cg17852104 | X  | 102,000,694 | 3.71E-15 | 0.302 | 0.273 |  |  |  | <i>BHLHB9</i>    | 5'UTR   |
| cg24687970 | 1  | 1,397,896   | 7.06E-15 | 0.302 | 0.302 |  |  |  | <i>ATAD3C</i>    | Body    |
| cg15442728 | 14 | 91,580,280  | 0.000274 | 0.302 | 0.178 |  |  |  | <i>C14orf159</i> | TSS200  |
| cg16058797 | 8  | 102,236,617 | 2.5E-07  | 0.302 | 0.319 |  |  |  |                  |         |
| cg10680264 | 15 | 75,470,927  | 8.93E-07 | 0.302 | 0.293 |  |  |  |                  |         |
| cg00384539 | 8  | 70,983,567  | 9.67E-10 | 0.302 | 0.316 |  |  |  | <i>PRDM14</i>    | TSS200  |
| cg08750459 | 17 | 6,558,815   | 4.77E-05 | 0.302 | 0.308 |  |  |  |                  |         |
| cg16204205 | 18 | 19,753,432  | 2.65E-22 | 0.302 | 0.268 |  |  |  | <i>GATA6</i>     | Body    |

|            |    |             |          |       |       |  |  |     |                |         |
|------------|----|-------------|----------|-------|-------|--|--|-----|----------------|---------|
| cg18447876 | 3  | 54,121,761  | 3.22E-06 | 0.302 | 0.338 |  |  |     |                |         |
| cg21752211 | 7  | 27,243,463  | 0.015147 | 0.302 | 0.389 |  |  |     |                |         |
| cg14580211 | 5  | 150,161,299 | 5.07E-13 | 0.302 | 0.290 |  |  |     | <i>C5orf62</i> | Body    |
| cg15485700 | 1  | 117,421,329 | 0.008619 | 0.302 | 0.102 |  |  |     |                |         |
| cg04963514 | 10 | 44,162,879  | 0.001196 | 0.302 | 0.247 |  |  |     |                |         |
| cg03470207 | 6  | 28,574,981  | 0.009427 | 0.302 | 0.311 |  |  |     |                |         |
| cg02871995 | 11 | 111,410,960 | 5.24E-11 | 0.302 | 0.262 |  |  |     | <i>LAYN</i>    | TSS1500 |
| cg00161791 | 21 | 45,575,014  | 4.42E-13 | 0.302 | 0.277 |  |  |     |                |         |
| cg04458368 | 8  | 38,411,682  | 0.00057  | 0.302 | 0.271 |  |  |     |                |         |
| cg27081634 | 11 | 68,778,745  | 4.74E-11 | 0.302 | 0.297 |  |  |     | <i>MRGPRF</i>  | 5'UTR   |
| cg00619126 | 2  | 105,459,775 | 3.55E-09 | 0.302 | 0.291 |  |  |     |                |         |
| cg21530419 | 3  | 186,490,728 | 1.42E-06 | 0.302 | 0.287 |  |  |     |                |         |
| cg23845168 | 17 | 31,271,015  | 2.76E-15 | 0.302 | 0.281 |  |  |     |                |         |
| cg18121003 | 11 | 86,085,757  | 1.08E-06 | 0.302 | 0.317 |  |  |     | <i>CCDC81</i>  | TSS200  |
| cg27009812 | 16 | 3,062,597   | 0.000101 | 0.302 | 0.305 |  |  |     | <i>CLDN9</i>   | 1stExon |
| cg09013220 | 17 | 45,944,385  | 3.26E-16 | 0.302 | 0.288 |  |  |     |                |         |
| cg07394914 | 4  | 185,371,335 | 2.04E-09 | 0.302 | 0.307 |  |  |     | <i>IRF2</i>    | 5'UTR   |
| cg24923226 | X  | 129,255,138 | 0.040173 | 0.302 | 0.394 |  |  |     |                |         |
| cg15803065 | 6  | 29,973,988  | 3.25E-07 | 0.302 | 0.332 |  |  | Yes | <i>HLA-J</i>   | Body    |
| cg05000331 | 16 | 79,623,678  | 6.43E-08 | 0.302 | 0.232 |  |  |     |                |         |
| cg09168153 | 13 | 110,779,117 | 2.98E-14 | 0.302 | 0.271 |  |  |     |                |         |
| cg05911003 | 4  | 187,065,516 | 1.79E-07 | 0.302 | 0.214 |  |  |     | <i>FAM149A</i> | TSS1500 |
| cg26851107 | 11 | 70,508,659  | 7.06E-15 | 0.302 | 0.258 |  |  |     | <i>SHANK2</i>  | Body    |
| cg13298199 | 1  | 208,132,388 | 6.06E-08 | 0.302 | 0.295 |  |  |     |                |         |
| cg15596666 | 10 | 135,160,792 | 1.02E-09 | 0.302 | 0.267 |  |  |     | <i>PRAP1</i>   | TSS200  |
| cg10829727 | 17 | 73,084,309  | 1.75E-20 | 0.302 | 0.307 |  |  |     | <i>SLC16A5</i> | 5'UTR   |
| cg13842305 | 1  | 151,033,007 | 8.02E-05 | 0.302 | 0.189 |  |  |     | <i>MLLT11</i>  | 5'UTR   |
| cg24199599 | 20 | 62,681,243  | 1.86E-06 | 0.302 | 0.294 |  |  |     | <i>SOX18</i>   | TSS1500 |
| cg08783090 | X  | 151,143,125 | 0.000116 | 0.301 | 0.324 |  |  |     | <i>GABRE</i>   | 1stExon |
| cg10248878 | 4  | 54,965,109  | 1.56E-09 | 0.301 | 0.302 |  |  |     | <i>GSX2</i>    | TSS1500 |
| cg05496203 | 2  | 66,664,798  | 0.002955 | 0.301 | 0.353 |  |  |     | <i>MEIS1</i>   | Body    |
| cg11891395 | 7  | 96,652,153  | 6.75E-09 | 0.301 | 0.290 |  |  |     | <i>DLX5</i>    | Body    |
| cg03124636 | 6  | 30,711,426  | 6.66E-19 | 0.301 | 0.289 |  |  |     | <i>IER3</i>    | 3'UTR   |
| cg15127227 | 7  | 131,242,878 | 0.013952 | 0.301 | 0.189 |  |  |     |                |         |

|            |    |             |          |       |       |          |       |     |                 |         |
|------------|----|-------------|----------|-------|-------|----------|-------|-----|-----------------|---------|
| cg24035484 | 12 | 20,000,505  | 6.26E-11 | 0.301 | 0.320 |          |       |     |                 |         |
| cg05388880 | 4  | 183,807,081 | 8.83E-08 | 0.301 | 0.271 |          |       |     |                 |         |
| cg03745002 | 16 | 52,581,405  | 0.045182 | 0.301 | 0.216 |          |       |     | <i>TOX3</i>     | 5'UTR   |
| cg22462235 | 1  | 226,129,481 | 3.8E-12  | 0.301 | 0.330 | 2.57E-18 | 0.222 | Yes | <i>LEFTY2</i>   | TSS1500 |
| cg13073224 | 12 | 117,131,523 | 0.008068 | 0.301 | 0.154 |          |       |     |                 |         |
| cg06074896 | 7  | 1,500,176   | 1.11E-14 | 0.301 | 0.309 |          |       |     | <i>MICALL2</i>  | TSS1500 |
| cg14847502 | 10 | 30,724,194  | 3.99E-05 | 0.301 | 0.252 |          |       |     | <i>MAP3K8</i>   | 5'UTR   |
| cg04248271 | 5  | 158,524,404 | 0.00132  | 0.301 | 0.363 |          |       |     | <i>EBF1</i>     | Body    |
| cg06808498 | 14 | 60,974,525  | 2.08E-05 | 0.301 | 0.272 |          |       |     | <i>SIX6</i>     | TSS1500 |
| cg18643093 | 5  | 150,521,257 | 1.8E-09  | 0.301 | 0.266 |          |       |     | <i>ANXA6</i>    | Body    |
| cg08443845 | 21 | 36,421,955  | 0.014728 | 0.301 | 0.175 |          |       |     | <i>RUNX1</i>    | TSS1500 |
| cg17800654 | 1  | 50,888,590  | 3.32E-06 | 0.301 | 0.315 |          |       |     | <i>DMRTA2</i>   | 5'UTR   |
| cg04278110 | 2  | 198,063,759 | 9.61E-05 | 0.301 | 0.240 |          |       |     | <i>ANKRD44</i>  | TSS1500 |
| cg26607748 | 9  | 35,690,226  | 3.09E-07 | 0.301 | 0.255 |          |       |     | <i>TPM2</i>     | TSS200  |
| cg02115599 | 7  | 27,244,564  | 0.032645 | 0.301 | 0.397 |          |       |     |                 |         |
| cg15104644 | 1  | 231,297,103 | 0.005224 | 0.301 | 0.351 |          |       |     |                 |         |
| cg00170003 | 6  | 108,490,371 | 6.37E-05 | 0.301 | 0.310 |          |       |     | <i>NR2E1</i>    | Body    |
| cg00395210 | 12 | 48,592,465  | 2.18E-07 | 0.301 | 0.307 |          |       |     |                 |         |
| cg07201620 | 5  | 83,679,941  | 0.000107 | 0.301 | 0.264 |          |       |     | <i>EDIL3</i>    | Body    |
| cg16371229 | 1  | 233,248,845 | 8.43E-08 | 0.301 | 0.294 |          |       |     | <i>PCNXL2</i>   | Body    |
| cg14335429 | 8  | 42,342,083  | 1.13E-22 | 0.301 | 0.264 |          |       |     | <i>SLC20A2</i>  | 5'UTR   |
| cg27545611 | 1  | 68,517,177  | 7.2E-16  | 0.301 | 0.309 |          |       |     | <i>DIRAS3</i>   | TSS1500 |
| cg05036656 | 4  | 41,875,470  | 0.000275 | 0.301 | 0.319 |          |       |     |                 |         |
| cg14920289 | 14 | 23,821,149  | 2.72E-28 | 0.301 | 0.290 |          |       |     | <i>SLC22A17</i> | Body    |
| cg09513990 | 6  | 27,235,822  | 0.000735 | 0.301 | 0.381 |          |       |     |                 |         |
| cg10163776 | 3  | 32,433,833  | 0.00655  | 0.301 | 0.221 |          |       |     | <i>CMTM7</i>    | Body    |
| cg25588844 | 2  | 10,037,561  | 9.36E-15 | 0.301 | 0.264 |          |       |     | <i>TAF1B</i>    | Body    |
| cg16310415 | 8  | 25,898,539  | 9.01E-07 | 0.301 | 0.263 |          |       |     | <i>EBF2</i>     | Body    |
| cg09849405 | 16 | 66,612,955  | 5.97E-05 | 0.301 | 0.264 |          |       |     | <i>CMTM1</i>    | 3'UTR   |
| cg13112361 | 11 | 63,258,739  | 0.042866 | 0.301 | 0.249 |          |       |     | <i>HRASLS5</i>  | TSS200  |
| cg02909790 | 6  | 26,271,587  | 0.00073  | 0.301 | 0.339 | 7.3E-19  | 0.262 |     | <i>HIST1H3G</i> | 1stExon |
| cg23398047 | 8  | 49,783,505  | 2.07E-26 | 0.301 | 0.278 |          |       |     |                 |         |
| cg15234492 | 12 | 122,019,076 | 1.24E-10 | 0.301 | 0.261 |          |       |     | <i>KDM2B</i>    | TSS200  |
| cg05221748 | 5  | 122,621,289 | 8.5E-05  | 0.301 | 0.304 |          |       |     |                 |         |

|            |    |             |          |       |       |          |       |     |                 |         |
|------------|----|-------------|----------|-------|-------|----------|-------|-----|-----------------|---------|
| cg14678774 | 19 | 12,978,360  | 6.15E-08 | 0.301 | 0.281 |          |       |     | <i>MAST1</i>    | Body    |
| cg07910560 | 7  | 157,361,396 | 1.08E-17 | 0.301 | 0.281 |          |       |     | <i>PTPRN2</i>   | Body    |
| cg07027116 | 1  | 65,731,738  | 0.037168 | 0.301 | 0.293 |          |       |     | <i>DNAJC6</i>   | Body    |
| cg17740822 | 12 | 89,744,609  | 3.97E-11 | 0.301 | 0.301 |          |       |     | <i>DUSP6</i>    | Body    |
| cg02970525 | 1  | 201,915,999 | 0.00231  | 0.301 | 0.117 |          |       |     | <i>LMOD1</i>    | TSS1500 |
| cg10251229 | 7  | 630,581     | 7.84E-12 | 0.301 | 0.279 |          |       |     | <i>PRKAR1B</i>  | Body    |
| cg15476790 | 2  | 218,786,102 | 6.77E-20 | 0.301 | 0.287 |          |       |     | <i>TNS1</i>     | 5'UTR   |
| cg01916115 | 6  | 129,204,339 | 0.000698 | 0.301 | 0.318 |          |       |     | <i>LAMA2</i>    | 5'UTR   |
| cg15056966 | 3  | 120,003,702 | 1.34E-05 | 0.301 | 0.229 |          |       |     |                 |         |
| cg14089984 | 1  | 1,182,418   | 0.001542 | 0.301 | 0.313 |          |       |     | <i>FAM132A</i>  | TSS1500 |
| cg09803262 | 7  | 96,622,608  | 1.44E-07 | 0.301 | 0.268 |          |       |     | <i>DLX6AS</i>   | Body    |
| cg00353773 | 10 | 44,880,708  | 0.000282 | 0.301 | 0.259 |          |       |     | <i>CXCL12</i>   | TSS200  |
| cg03148889 | 1  | 78,706,562  | 4.89E-12 | 0.301 | 0.285 |          |       |     | <i>MGC27382</i> | Body    |
| cg13294849 | 3  | 181,441,571 | 7.98E-06 | 0.301 | 0.285 |          |       |     | <i>SOX2OT</i>   | Body    |
| cg08207876 | 2  | 181,844,876 | 0.028222 | 0.301 | 0.287 |          |       | Yes | <i>UBE2E3</i>   | TSS1500 |
| cg03832522 | 2  | 218,898,668 | 8.91E-06 | 0.301 | 0.296 |          |       |     |                 |         |
| cg08162372 | 14 | 54,422,925  | 0.039233 | 0.301 | 0.376 |          |       |     | <i>BMP4</i>     | 5'UTR   |
| cg06169590 | 2  | 43,455,088  | 0.000308 | 0.301 | 0.210 |          |       |     | <i>ZFP36L2</i>  | TSS1500 |
| cg11102858 | 17 | 66,255,427  | 0.000857 | 0.301 | 0.322 |          |       |     | <i>ARSG</i>     | 5'UTR   |
| cg02897667 | 7  | 51,539,131  | 2.04E-08 | 0.301 | 0.235 |          |       |     |                 |         |
| cg04965987 | 21 | 38,378,539  | 6.06E-07 | 0.301 | 0.255 |          |       |     | <i>DSCR6</i>    | TSS1500 |
| cg07303912 | 20 | 6,032,782   | 0.004936 | 0.301 | 0.120 |          |       |     | <i>LRRN4</i>    | Body    |
| cg16856833 | 3  | 87,138,640  | 7.37E-07 | 0.301 | 0.246 |          |       |     |                 |         |
| cg23923856 | 1  | 113,051,685 | 0.000757 | 0.301 | 0.285 |          |       |     | <i>WNT2B</i>    | Body    |
| cg07080224 | 14 | 21,574,644  | 2.92E-13 | 0.301 | 0.307 |          |       |     |                 |         |
| cg17227926 | 10 | 115,860,799 | 0.013205 | 0.301 | 0.063 |          |       |     |                 |         |
| cg07773769 | 3  | 52,280,329  | 5.4E-09  | 0.301 | 0.226 |          |       |     | <i>PPM1M</i>    | 1stExon |
| cg19536664 | 17 | 6,899,085   | 1.26E-10 | 0.301 | 0.241 |          |       |     | <i>ALOX12</i>   | TSS1500 |
| cg22352717 | 2  | 132,285,972 | 0.000123 | 0.301 | 0.223 |          |       |     | <i>CCDC74A</i>  | Body    |
| cg05707492 | 17 | 78,833,484  | 5.2E-07  | 0.301 | 0.198 |          |       |     | <i>RPTOR</i>    | Body    |
| cg20078807 | 22 | 45,608,713  | 5.14E-13 | 0.301 | 0.269 |          |       |     | <i>C22orf9</i>  | Body    |
| cg15366127 | X  | 40,003,935  | 1.59E-15 | 0.301 | 0.280 |          |       |     | <i>BCOR</i>     | 5'UTR   |
| cg21504918 | 5  | 150,400,001 | 0.001361 | 0.301 | 0.127 | 2.15E-11 | 0.166 |     | <i>GPX3</i>     | 5'UTR   |
| cg23965588 | 11 | 71,699,167  | 1.23E-11 | 0.301 | 0.292 |          |       |     | <i>RNF121</i>   | Body    |



|            |    |             |          |       |       |          |       |  |                 |         |
|------------|----|-------------|----------|-------|-------|----------|-------|--|-----------------|---------|
| cg08309183 | 7  | 150,674,375 | 3.54E-14 | 0.301 | 0.299 |          |       |  | <i>KCNH2</i>    | Body    |
| cg11213150 | 9  | 129,884,457 | 2.69E-22 | 0.300 | 0.285 | 3.6E-16  | 0.163 |  | <i>ANGPTL2</i>  | 5'UTR   |
| cg18905461 | 14 | 52,534,596  | 0.00279  | 0.300 | 0.332 |          |       |  | <i>NID2</i>     | Body    |
| cg26022526 | 4  | 8,271,319   | 1.5E-07  | 0.300 | 0.243 |          |       |  | <i>HTRA3</i>    | TSS200  |
| cg13023623 | 14 | 57,276,257  | 4.23E-07 | 0.300 | 0.317 |          |       |  | <i>OTX2</i>     | 5'UTR   |
| cg13787932 | 5  | 191,793     | 1.16E-19 | 0.300 | 0.283 |          |       |  | <i>LRRC14B</i>  | 1stExon |
| cg13692082 | 9  | 136,447,400 | 1.74E-16 | 0.300 | 0.288 |          |       |  |                 |         |
| cg08864042 | 2  | 74,607,470  | 5.64E-14 | 0.300 | 0.311 |          |       |  | <i>DCTN1</i>    | 5'UTR   |
| cg10062193 | 4  | 47,533,905  | 7.25E-14 | 0.300 | 0.314 |          |       |  | <i>ATP10D</i>   | Body    |
| cg15982972 | 5  | 50,260,129  | 3.61E-05 | 0.300 | 0.232 |          |       |  |                 |         |
| cg20648847 | 11 | 66,326,767  | 4.42E-05 | 0.300 | 0.335 |          |       |  | <i>ACTN3</i>    | Body    |
| cg12366772 | 2  | 122,041,891 | 1.34E-11 | 0.300 | 0.281 |          |       |  | <i>TFCP2L1</i>  | Body    |
| cg12552771 | 22 | 29,709,320  | 4.27E-05 | 0.300 | 0.335 |          |       |  | <i>RASL10A</i>  | Body    |
| cg02798576 | 10 | 101,290,168 | 7.62E-06 | 0.300 | 0.291 |          |       |  |                 |         |
| cg17534540 | 3  | 129,024,712 | 5.78E-13 | 0.300 | 0.315 |          |       |  |                 |         |
| cg00026474 | 8  | 134,585,500 | 4.03E-11 | 0.300 | 0.296 |          |       |  | <i>ST3GAL1</i>  | TSS1500 |
| cg13329912 | 6  | 16,215,786  | 9.47E-11 | 0.300 | 0.299 |          |       |  |                 |         |
| cg19572637 | 2  | 66,660,175  | 2.16E-07 | 0.300 | 0.260 |          |       |  |                 |         |
| cg18137704 | 22 | 17,602,681  | 9.85E-13 | 0.300 | 0.265 | 5.06E-30 | 0.196 |  | <i>CECR6</i>    | TSS1500 |
| cg03323696 | 5  | 59,189,120  | 6.24E-05 | 0.300 | 0.296 |          |       |  | <i>PDE4D</i>    | Body    |
| cg03635766 | 17 | 38,607,865  | 1.28E-18 | 0.300 | 0.308 |          |       |  | <i>IGFBP4</i>   | Body    |
| cg14019186 | 3  | 158,390,074 | 0.015872 | 0.300 | 0.231 |          |       |  | <i>GFM1</i>     | Body    |
| cg26734888 | 19 | 37,825,307  | 0.004314 | 0.300 | 0.178 |          |       |  | <i>HKR1</i>     | TSS1500 |
| cg25844133 | 17 | 21,477,738  | 6.97E-06 | 0.300 | 0.284 |          |       |  |                 |         |
| cg05687834 | 12 | 106,534,276 | 3.35E-09 | 0.300 | 0.282 |          |       |  | <i>NUAK1</i>    | TSS1500 |
| cg02769145 | 1  | 160,952,126 | 0.002129 | 0.300 | 0.318 |          |       |  |                 |         |
| cg01355757 | 2  | 74,272,773  | 1.4E-20  | 0.300 | 0.311 |          |       |  | <i>TET3</i>     | TSS1500 |
| cg04645914 | 19 | 52,452,317  | 0.000183 | 0.300 | 0.312 |          |       |  |                 |         |
| cg20652404 | 15 | 74,218,904  | 2.99E-17 | 0.300 | 0.270 |          |       |  | <i>LOXL1</i>    | 5'UTR   |
| cg07517893 | 19 | 45,889,164  | 1.68E-06 | 0.300 | 0.298 |          |       |  | <i>PPP1R13L</i> | Body    |
| cg05065948 | 4  | 26,275,089  | 4.04E-26 | 0.300 | 0.279 |          |       |  |                 |         |
| cg15292275 | 13 | 109,149,011 | 0.001145 | 0.300 | 0.229 |          |       |  |                 |         |
| cg17459215 | 2  | 66,298,242  | 2.23E-08 | 0.300 | 0.322 |          |       |  |                 |         |
| cg10082841 | 9  | 130,689,321 | 1.03E-11 | 0.300 | 0.250 |          |       |  | <i>PIP5KL1</i>  | Body    |

|            |    |             |          |       |       |          |       |     |                  |         |
|------------|----|-------------|----------|-------|-------|----------|-------|-----|------------------|---------|
| cg14380111 | 15 | 81,426,360  | 0.000263 | 0.300 | 0.235 |          |       |     | <i>C15orf26</i>  | TSS1500 |
| cg15970666 | 2  | 162,095,662 | 6.46E-10 | 0.300 | 0.292 |          |       |     |                  |         |
| cg21770060 | 3  | 159,583,545 | 2.93E-15 | 0.300 | 0.269 |          |       |     | <i>SCHIP1</i>    | Body    |
| cg00912746 | 1  | 33,350,709  | 4.36E-21 | 0.300 | 0.301 |          |       |     | <i>HPCA</i>      | TSS1500 |
| cg06108383 | 6  | 32,120,899  | 9.77E-13 | 0.300 | 0.292 |          |       |     | <i>PPT2</i>      | TSS1500 |
| cg02327530 | 7  | 100,091,786 | 1.53E-14 | 0.300 | 0.304 |          |       |     | <i>C7orf51</i>   | 3'UTR   |
| cg17143518 | 18 | 20,716,545  | 1.54E-06 | 0.300 | 0.176 |          |       |     | <i>CABLES1</i>   | 1stExon |
| cg20133129 | X  | 153,192,433 | 0.014717 | 0.300 | 0.277 |          |       |     | <i>ARHGAP4</i>   | TSS1500 |
| cg25149251 | 7  | 100,488,527 | 0.006609 | 0.300 | 0.310 |          |       |     | <i>UFSP1</i>     | TSS1500 |
| cg00690082 | 17 | 40,438,511  | 1.49E-17 | 0.300 | 0.278 |          |       |     | <i>STAT5A</i>    | TSS1500 |
| cg16937268 | 20 | 21,684,417  | 0.002578 | 0.300 | 0.329 |          |       |     |                  |         |
| cg13551814 | 20 | 45,280,276  | 3.62E-16 | 0.300 | 0.293 |          |       |     | <i>SLC13A3</i>   | TSS200  |
| cg17180284 | 13 | 31,783,983  | 2.6E-07  | 0.300 | 0.348 |          |       |     | <i>B3GALTL</i>   | Body    |
| cg17260706 | 11 | 118,782,879 | 1.06E-19 | 0.300 | 0.267 |          |       |     | <i>BCL9L</i>     | TSS1500 |
| cg01744822 | 16 | 73,100,510  | 6.92E-19 | 0.300 | 0.289 |          |       |     |                  |         |
| cg15184386 | 3  | 136,538,601 | 0.006749 | 0.300 | 0.135 |          |       |     | <i>TMEM22</i>    | 5'UTR   |
| cg17608103 | 6  | 169,653,612 | 0.001309 | 0.300 | 0.334 |          |       |     | <i>THBS2</i>     | 5'UTR   |
| cg18755783 | 13 | 36,919,905  | 0.02413  | 0.300 | 0.341 | 1.92E-18 | 0.251 |     | <i>SPG20</i>     | 5'UTR   |
| cg00488692 | 2  | 174,877,566 | 1.17E-05 | 0.300 | 0.269 |          |       |     |                  |         |
| cg08958294 | 6  | 146,350,131 | 0.012785 | 0.300 | 0.396 |          |       |     | <i>GRM1</i>      | 5'UTR   |
| cg04970352 | 11 | 44,327,399  | 6.54E-07 | 0.300 | 0.298 | 1.24E-22 | 0.272 |     | <i>ALX4</i>      | Body    |
| cg21820656 | 15 | 59,157,075  | 5.6E-08  | 0.300 | 0.314 |          |       |     |                  |         |
| cg12596505 | 1  | 213,090,240 | 3.49E-05 | 0.300 | 0.335 |          |       |     |                  |         |
| cg11759875 | 8  | 1,405,060   | 4.39E-34 | 0.300 | 0.255 |          |       | Yes |                  |         |
| cg00531748 | 4  | 55,992,689  | 3.35E-07 | 0.300 | 0.269 |          |       |     | <i>KDR</i>       | TSS1500 |
| cg17674042 | 6  | 34,482,479  | 6.88E-09 | 0.300 | 0.289 |          |       |     | <i>PACSN1</i>    | 5'UTR   |
| cg18128164 | 19 | 2,253,492   | 3.51E-12 | 0.300 | 0.286 |          |       |     | <i>JSRP1</i>     | Body    |
| cg11498607 | 21 | 36,399,226  | 0.000155 | 0.300 | 0.316 |          |       |     | <i>RUNX1</i>     | Body    |
| cg19626138 | 8  | 37,731,969  | 3.35E-23 | 0.300 | 0.287 |          |       |     | <i>RAB11FIP1</i> | Body    |
| cg10861599 | 1  | 173,176,523 | 6.27E-09 | 0.300 | 0.296 | 1.76E-09 | 0.167 |     | <i>TNFSF4</i>    | TSS200  |
| cg14015044 | 8  | 22,960,619  | 0.008103 | 0.300 | 0.268 | 3.9E-22  | 0.260 |     | <i>TNFRSF10C</i> | 5'UTR   |
| cg16126286 | 1  | 243,646,235 | 3.85E-06 | 0.300 | 0.235 |          |       |     | <i>SDCCAG8</i>   | Body    |
| cg14442421 | 9  | 19,788,257  | 0.000716 | 0.300 | 0.134 |          |       |     | <i>SLC24A2</i>   | TSS1500 |
| cg26027669 | 1  | 92,952,467  | 0.000162 | 0.300 | 0.262 |          |       |     | <i>GFI1</i>      | TSS1500 |

|            |    |             |          |       |       |          |       |  |                  |         |
|------------|----|-------------|----------|-------|-------|----------|-------|--|------------------|---------|
| cg04376123 | 7  | 73,895,109  | 6.6E-06  | 0.299 | 0.253 |          |       |  | <i>GTF2IRD1</i>  | 5'UTR   |
| cg04621728 | 2  | 234,934,131 | 4.04E-07 | 0.299 | 0.275 |          |       |  |                  |         |
| cg19214707 | 7  | 3,157,722   | 8.25E-05 | 0.299 | 0.237 |          |       |  |                  |         |
| cg20229496 | 19 | 35,395,800  | 1.96E-09 | 0.299 | 0.306 |          |       |  |                  |         |
| cg18514922 | 2  | 160,761,262 | 0.000525 | 0.299 | 0.296 |          |       |  | <i>LY75</i>      | TSS200  |
| cg23298862 | 7  | 158,159,286 | 5.07E-08 | 0.299 | 0.286 |          |       |  | <i>PTPRN2</i>    | Body    |
| cg26071135 | 11 | 843,943     | 1.54E-05 | 0.299 | 0.232 |          |       |  | <i>TSPAN4</i>    | TSS1500 |
| cg15426035 | 19 | 36,024,685  | 3.16E-05 | 0.299 | 0.320 |          |       |  | <i>GAPDHS</i>    | Body    |
| cg17716765 | 15 | 29,407,853  | 9.1E-05  | 0.299 | 0.266 |          |       |  | <i>APBA2</i>     | Body    |
| cg02804510 | 19 | 49,199,965  | 6.73E-05 | 0.299 | 0.271 |          |       |  | <i>FUT2</i>      | 5'UTR   |
| cg12378753 | 10 | 116,527,201 | 1.14E-09 | 0.299 | 0.224 |          |       |  |                  |         |
| cg08465346 | 12 | 54,441,458  | 0.000126 | 0.299 | 0.264 |          |       |  | <i>HOXC4</i>     | 5'UTR   |
| cg11334771 | 11 | 71,955,337  | 0.000173 | 0.299 | 0.285 |          |       |  | <i>PHOX2A</i>    | TSS200  |
| cg17589341 | 18 | 43,304,079  | 8.4E-10  | 0.299 | 0.303 | 5.62E-29 | 0.274 |  | <i>SLC14A1</i>   | TSS200  |
| cg10587854 | 3  | 37,011,630  | 6.64E-08 | 0.299 | 0.321 |          |       |  |                  |         |
| cg25099065 | 2  | 69,994,225  | 2.71E-41 | 0.299 | 0.302 |          |       |  | <i>ANXA4</i>     | 5'UTR   |
| cg27277463 | 12 | 62,585,031  | 0.026086 | 0.299 | 0.366 |          |       |  | <i>FAM19A2</i>   | 5'UTR   |
| cg05001334 | 13 | 35,391,234  | 1.33E-05 | 0.299 | 0.229 |          |       |  |                  |         |
| cg16778107 | 16 | 381,873     | 5.03E-15 | 0.299 | 0.313 |          |       |  | <i>AXIN1</i>     | Body    |
| cg17269633 | 17 | 42,733,600  | 2.51E-05 | 0.299 | 0.261 |          |       |  | <i>C17orf104</i> | TSS200  |
| cg22139166 | 5  | 124,071,107 | 2.11E-07 | 0.299 | 0.256 |          |       |  | <i>ZNF608</i>    | Body    |
| cg00530492 | 6  | 29,943,464  | 3.97E-05 | 0.299 | 0.315 |          |       |  | <i>HCG9</i>      | Body    |
| cg22111078 | 5  | 172,655,925 | 1.02E-06 | 0.299 | 0.258 |          |       |  |                  |         |
| cg01142710 | 5  | 145,713,754 | 1.81E-05 | 0.299 | 0.277 |          |       |  |                  |         |
| cg16509851 | 4  | 174,430,614 | 0.000624 | 0.299 | 0.309 |          |       |  |                  |         |
| cg21004104 | 1  | 15,954,209  | 5.15E-14 | 0.299 | 0.250 |          |       |  | <i>DDI2</i>      | Body    |
| cg19428722 | 10 | 100,994,478 | 7.19E-06 | 0.299 | 0.274 |          |       |  | <i>HPSE2</i>     | Body    |
| cg26130488 | 17 | 59,530,104  | 3.03E-09 | 0.299 | 0.298 |          |       |  |                  |         |
| cg07220922 | 3  | 10,806,022  | 0.00048  | 0.299 | 0.273 |          |       |  | <i>LOC285370</i> | TSS200  |
| cg12585943 | 6  | 32,121,368  | 5.49E-17 | 0.299 | 0.290 | 2.8E-33  | 0.246 |  | <i>PPT2</i>      | TSS1500 |
| cg03166753 | 6  | 38,683,221  | 2.94E-12 | 0.299 | 0.287 |          |       |  |                  |         |
| cg16557944 | 1  | 53,068,197  | 0.002839 | 0.299 | 0.090 | 1.4E-11  | 0.258 |  | <i>GPX7</i>      | 1stExon |
| cg11586832 | 22 | 37,721,305  | 3.08E-06 | 0.299 | 0.239 |          |       |  |                  |         |
| cg00762613 | 13 | 36,045,224  | 0.000269 | 0.299 | 0.327 |          |       |  | <i>NBEA</i>      | Body    |

|            |    |             |          |       |       |          |       |  |                  |         |
|------------|----|-------------|----------|-------|-------|----------|-------|--|------------------|---------|
| cg20175702 | 15 | 70,053,398  | 1.91E-06 | 0.299 | 0.297 |          |       |  |                  |         |
| cg25157524 | 13 | 30,002,931  | 0.000192 | 0.299 | 0.236 |          |       |  | <i>MTUS2</i>     | 1stExon |
| cg01860897 | 1  | 90,309,605  | 1.46E-07 | 0.299 | 0.233 |          |       |  | <i>LRR8D</i>     | 5'UTR   |
| cg04111435 | 11 | 63,448,455  | 0.000487 | 0.299 | 0.164 |          |       |  | <i>RTN3</i>      | TSS1500 |
| cg19108771 | 6  | 32,076,337  | 1.04E-06 | 0.299 | 0.333 |          |       |  | <i>TNXB</i>      | 5'UTR   |
| cg26818820 | 5  | 135,468,000 | 2.63E-07 | 0.299 | 0.259 |          |       |  | <i>SMAD5</i>     | TSS1500 |
| cg26156256 | 1  | 116,370,891 | 1.67E-39 | 0.299 | 0.282 |          |       |  |                  |         |
| cg20313963 | 12 | 8,089,207   | 2.88E-09 | 0.299 | 0.299 |          |       |  | <i>SLC2A3</i>    | TSS1500 |
| cg26995244 | 22 | 45,125,395  | 3.61E-25 | 0.299 | 0.295 |          |       |  | <i>PRR5</i>      | Body    |
| cg11445109 | 10 | 135,343,248 | 0.01993  | 0.299 | 0.240 |          |       |  | <i>CYP2E1</i>    | Body    |
| cg06274159 | 4  | 188,916,867 | 0.001303 | 0.299 | 0.320 | 3.78E-12 | 0.265 |  | <i>ZFP42</i>     | TSS200  |
| cg21143446 | 13 | 108,922,340 | 3.39E-06 | 0.299 | 0.255 |          |       |  | <i>TNFSF13B</i>  | 1stExon |
| cg01544903 | 16 | 56,697,229  | 1.59E-07 | 0.299 | 0.293 |          |       |  |                  |         |
| cg14654171 | 9  | 130,151,001 | 5.49E-07 | 0.299 | 0.292 |          |       |  | <i>GARNL3</i>    | Body    |
| cg04217778 | 7  | 5,111,916   | 0.007805 | 0.299 | 0.317 |          |       |  | <i>LOC389458</i> | Body    |
| cg26181939 | 11 | 61,063,062  | 3.34E-19 | 0.299 | 0.257 |          |       |  | <i>VWCE</i>      | TSS1500 |
| cg07964848 | 10 | 28,035,894  | 1.41E-07 | 0.299 | 0.309 |          |       |  | <i>MKX</i>       | TSS1500 |
| cg17011709 | 10 | 94,826,053  | 1.75E-05 | 0.299 | 0.186 |          |       |  | <i>CYP26C1</i>   | Body    |
| cg06894334 | 4  | 1,398,599   | 8.92E-10 | 0.299 | 0.267 |          |       |  |                  |         |
| cg23562538 | 8  | 144,798,877 | 1.72E-19 | 0.299 | 0.323 |          |       |  | <i>MAPK15</i>    | Body    |
| cg23313031 | 6  | 29,974,745  | 1.26E-09 | 0.299 | 0.284 |          |       |  | <i>HLA-J</i>     | Body    |
| cg02792792 | 5  | 115,152,420 | 0.001226 | 0.299 | 0.152 |          |       |  | <i>CDO1</i>      | TSS200  |
| cg06370069 | 10 | 73,728,417  | 5.92E-09 | 0.299 | 0.305 |          |       |  | <i>CHST3</i>     | 5'UTR   |
| cg06585233 | 1  | 229,543,009 | 1.77E-06 | 0.299 | 0.297 |          |       |  |                  |         |
| cg15856626 | 3  | 140,796,013 | 5.63E-06 | 0.299 | 0.263 |          |       |  | <i>SPSB4</i>     | Body    |
| cg23489038 | 12 | 111,619,190 | 0.00183  | 0.299 | 0.175 |          |       |  | <i>CUX2</i>      | Body    |
| cg04282607 | 22 | 22,007,286  | 1.56E-25 | 0.299 | 0.288 |          |       |  | <i>MIR301B</i>   | Body    |
| cg24314564 | 3  | 188,668,940 | 1.31E-08 | 0.299 | 0.322 |          |       |  |                  |         |
| cg11861562 | 11 | 117,069,780 | 2.27E-18 | 0.299 | 0.307 |          |       |  | <i>TAGLN</i>     | TSS1500 |
| cg19792802 | 11 | 65,647,270  | 1.25E-12 | 0.299 | 0.288 |          |       |  | <i>CTSW</i>      | TSS200  |
| cg03269060 | 3  | 158,450,208 | 0.031937 | 0.299 | 0.120 |          |       |  | <i>RARRES1</i>   | 5'UTR   |
| cg13692446 | 13 | 112,759,719 | 0.013842 | 0.299 | 0.368 |          |       |  |                  |         |
| cg10776919 | 1  | 50,889,442  | 4.92E-10 | 0.299 | 0.279 |          |       |  | <i>DMRTA2</i>    | TSS1500 |
| cg19696441 | 1  | 20,512,463  | 4.14E-06 | 0.299 | 0.293 |          |       |  | <i>UBXN10</i>    | TSS200  |

|            |    |             |          |       |       |          |       |  |                  |         |
|------------|----|-------------|----------|-------|-------|----------|-------|--|------------------|---------|
| cg18093120 | 22 | 50,523,955  | 3.33E-05 | 0.299 | 0.263 |          |       |  | <i>MLC1</i>      | 1stExon |
| cg18187244 | 6  | 10,881,782  | 6.61E-07 | 0.299 | 0.289 |          |       |  | <i>GCM2</i>      | Body    |
| cg26781150 | 1  | 45,792,542  | 6.67E-05 | 0.299 | 0.287 | 1.55E-26 | 0.201 |  | <i>HPDL</i>      | TSS200  |
| cg12516959 | 21 | 47,718,080  | 1.43E-17 | 0.299 | 0.283 |          |       |  |                  |         |
| cg15232240 | 6  | 90,143,704  | 0.005658 | 0.299 | 0.236 |          |       |  | <i>ANKRD6</i>    | 5'UTR   |
| cg22466678 | 12 | 89,749,033  | 3.52E-08 | 0.299 | 0.293 |          |       |  |                  |         |
| cg04212092 | 1  | 27,889,261  | 1.02E-15 | 0.299 | 0.291 |          |       |  | <i>AHDC1</i>     | 5'UTR   |
| cg08034440 | 2  | 176,940,341 | 2.85E-05 | 0.299 | 0.227 |          |       |  |                  |         |
| cg01449144 | 8  | 49,782,592  | 3.48E-05 | 0.299 | 0.223 |          |       |  |                  |         |
| cg18834878 | X  | 105,067,311 | 0.001097 | 0.298 | 0.258 |          |       |  | <i>NRK</i>       | Body    |
| cg22979093 | 7  | 137,028,410 | 0.002844 | 0.298 | 0.207 |          |       |  | <i>PTN</i>       | 5'UTR   |
| cg14635269 | 9  | 129,439,339 | 1.12E-06 | 0.298 | 0.283 |          |       |  | <i>LMX1B</i>     | Body    |
| cg15988320 | 5  | 140,868,422 | 1.73E-11 | 0.298 | 0.322 |          |       |  | <i>PCDHGA4</i>   | Body    |
| cg03794213 | 16 | 22,220,727  | 5.16E-11 | 0.298 | 0.331 |          |       |  | <i>EEF2K</i>     | 5'UTR   |
| cg27592331 | 18 | 19,756,582  | 1.13E-06 | 0.298 | 0.284 |          |       |  | <i>GATA6</i>     | Body    |
| cg14473575 | 3  | 193,788,394 | 0.001143 | 0.298 | 0.209 |          |       |  |                  |         |
| cg16707227 | 2  | 19,157,847  | 0.033063 | 0.298 | 0.194 |          |       |  |                  |         |
| cg13463203 | 9  | 132,961,972 | 1.44E-20 | 0.298 | 0.306 |          |       |  | <i>FREQ</i>      | TSS1500 |
| cg11603463 | 8  | 10,588,486  | 8.04E-07 | 0.298 | 0.181 |          |       |  | <i>SOX7</i>      | TSS1500 |
| cg22560979 | 5  | 10,565,263  | 0.000436 | 0.298 | 0.272 |          |       |  | <i>ANKRD33B</i>  | Body    |
| cg17516247 | 1  | 174,933,574 | 4.77E-27 | 0.298 | 0.288 |          |       |  |                  |         |
| cg06897478 | 1  | 20,799,799  | 4.9E-11  | 0.298 | 0.272 |          |       |  |                  |         |
| cg14626725 | 2  | 238,080,231 | 1.63E-17 | 0.298 | 0.281 |          |       |  |                  |         |
| cg11385003 | 21 | 45,148,332  | 0.023634 | 0.298 | 0.189 |          |       |  | <i>PDXK</i>      | Body    |
| cg03943218 | 10 | 102,419,600 | 0.011339 | 0.298 | 0.304 |          |       |  |                  |         |
| cg02276070 | 5  | 149,683,066 | 3.46E-23 | 0.298 | 0.261 |          |       |  | <i>ARSI</i>      | TSS1500 |
| cg04192393 | 15 | 63,673,286  | 1.03E-14 | 0.298 | 0.292 |          |       |  | <i>CA12</i>      | Body    |
| cg13797425 | 14 | 102,554,977 | 3.09E-06 | 0.298 | 0.309 |          |       |  | <i>HSP90AA1</i>  | TSS1500 |
| cg07636194 | 6  | 27,107,282  | 9.23E-06 | 0.298 | 0.295 |          |       |  | <i>HIST1H2BK</i> | 3'UTR   |
| cg16709232 | 17 | 72,322,154  | 0.001166 | 0.298 | 0.189 |          |       |  | <i>KIF19</i>     | TSS200  |
| cg19546583 | 19 | 16,022,523  | 1.44E-07 | 0.298 | 0.283 |          |       |  |                  |         |
| cg08857994 | 2  | 130,763,641 | 2.68E-05 | 0.298 | 0.298 |          |       |  |                  |         |
| cg02367655 | 1  | 178,064,623 | 0.001561 | 0.298 | 0.343 |          |       |  | <i>RASAL2</i>    | Body    |
| cg02491396 | 2  | 172,966,428 | 5.55E-05 | 0.298 | 0.364 |          |       |  | <i>DLX2</i>      | Body    |

|            |    |             |          |       |       |          |       |  |                  |         |
|------------|----|-------------|----------|-------|-------|----------|-------|--|------------------|---------|
| cg21241675 | 9  | 93,925,541  | 4.21E-15 | 0.298 | 0.281 |          |       |  |                  |         |
| cg05086798 | X  | 23,350,313  | 0.000775 | 0.298 | 0.285 |          |       |  |                  |         |
| cg22660578 | 17 | 35,294,029  | 3.29E-05 | 0.298 | 0.334 | 2.61E-13 | 0.200 |  | <i>LHX1</i>      | TSS1500 |
| cg15367247 | 3  | 185,960,440 | 6.31E-08 | 0.298 | 0.310 |          |       |  | <i>DGKG</i>      | Body    |
| cg06807117 | 1  | 204,329,004 | 4.34E-28 | 0.298 | 0.288 |          |       |  | <i>PLEKHA6</i>   | 5'UTR   |
| cg17344321 | 7  | 22,617,382  | 0.000481 | 0.298 | 0.228 |          |       |  |                  |         |
| cg12248614 | 19 | 41,018,880  | 0.041217 | 0.298 | 0.298 |          |       |  | <i>SPTBN4</i>    | Body    |
| cg18566883 | 21 | 38,919,676  | 0.007091 | 0.298 | 0.217 |          |       |  |                  |         |
| cg07126525 | 6  | 166,218,519 | 0.043294 | 0.298 | 0.160 |          |       |  |                  |         |
| cg17495912 | 13 | 37,006,340  | 0.008343 | 0.298 | 0.276 |          |       |  | <i>CCNA1</i>     | 5'UTR   |
| cg24374161 | 11 | 46,582,058  | 0.001411 | 0.298 | 0.181 |          |       |  | <i>AMBRA1</i>    | 5'UTR   |
| cg15087147 | 7  | 127,672,169 | 9.06E-07 | 0.298 | 0.215 | 1.12E-10 | 0.186 |  | <i>SND1</i>      | Body    |
| cg11843238 | 5  | 131,593,191 | 0.00677  | 0.298 | 0.218 |          |       |  | <i>PDLIM4</i>    | TSS200  |
| cg02539083 | 7  | 97,361,148  | 2.8E-07  | 0.298 | 0.287 |          |       |  | <i>TAC1</i>      | TSS200  |
| cg24404630 | 18 | 13,611,824  | 8.93E-10 | 0.298 | 0.276 |          |       |  | <i>C18orf1</i>   | 5'UTR   |
| cg10648139 | 2  | 206,551,364 | 0.000975 | 0.298 | 0.301 |          |       |  | <i>NRP2</i>      | Body    |
| cg12116288 | 17 | 70,215,735  | 6.93E-07 | 0.298 | 0.275 |          |       |  |                  |         |
| cg10440578 | 1  | 115,397,857 | 0.008676 | 0.298 | 0.250 |          |       |  | <i>SYCP1</i>     | 5'UTR   |
| cg15496864 | 10 | 119,312,767 | 0.005176 | 0.298 | 0.366 |          |       |  |                  |         |
| cg25451893 | 12 | 25,538,177  | 2.98E-05 | 0.298 | 0.228 |          |       |  |                  |         |
| cg07679836 | 6  | 33,548,423  | 2.44E-06 | 0.298 | 0.238 |          |       |  | <i>BAK1</i>      | TSS1500 |
| cg12966367 | 3  | 50,378,407  | 1.13E-06 | 0.298 | 0.277 |          |       |  | <i>RASSF1</i>    | TSS200  |
| cg18040354 | 17 | 53,800,484  | 0.00348  | 0.298 | 0.315 |          |       |  | <i>TMEM100</i>   | TSS1500 |
| cg18070676 | 14 | 85,997,519  | 0.000634 | 0.298 | 0.328 |          |       |  | <i>FLRT2</i>     | 5'UTR   |
| cg17177632 | 2  | 131,512,961 | 0.004244 | 0.298 | 0.281 |          |       |  | <i>FAM123C</i>   | TSS1500 |
| cg17972013 | 5  | 9,547,468   | 1.37E-15 | 0.298 | 0.260 |          |       |  | <i>SNORD123</i>  | TSS1500 |
| cg22881435 | 8  | 37,732,086  | 2.97E-18 | 0.298 | 0.267 |          |       |  | <i>RAB11FIP1</i> | Body    |
| cg05690644 | 8  | 97,158,015  | 2.54E-09 | 0.298 | 0.303 |          |       |  | <i>GDF6</i>      | Body    |
| cg13934625 | 15 | 52,472,770  | 6.65E-05 | 0.298 | 0.208 |          |       |  | <i>GNB5</i>      | TSS1500 |
| cg20191066 | 17 | 56,413,977  | 1.42E-08 | 0.298 | 0.297 |          |       |  |                  |         |
| cg03512637 | 6  | 33,215,685  | 6.9E-09  | 0.298 | 0.308 |          |       |  |                  |         |
| cg02413040 | 21 | 36,419,648  | 4.71E-06 | 0.298 | 0.260 |          |       |  | <i>RUNX1</i>     | Body    |
| cg08477106 | 4  | 75,895,596  | 3.2E-24  | 0.298 | 0.277 |          |       |  | <i>PARM1</i>     | Body    |
| cg11334165 | 5  | 145,758,782 | 1.45E-20 | 0.298 | 0.283 |          |       |  |                  |         |

|            |    |             |          |       |       |          |       |  |                 |         |
|------------|----|-------------|----------|-------|-------|----------|-------|--|-----------------|---------|
| cg18412777 | X  | 133,680,665 | 0.008168 | 0.298 | 0.238 |          |       |  | <i>MGC16121</i> | TSS200  |
| cg25786366 | 22 | 24,817,597  | 1.17E-07 | 0.298 | 0.316 |          |       |  |                 |         |
| cg02527527 | 22 | 38,303,310  | 1.36E-12 | 0.298 | 0.243 |          |       |  | <i>MICALL1</i>  | Body    |
| cg00376553 | 7  | 100,073,281 | 4.68E-29 | 0.298 | 0.310 |          |       |  | <i>TSC22D4</i>  | Body    |
| cg23874437 | 19 | 38,886,110  | 1.32E-11 | 0.298 | 0.296 |          |       |  | <i>SPRED3</i>   | Body    |
| cg19103169 | 7  | 1,280,040   | 0.000315 | 0.298 | 0.323 |          |       |  |                 |         |
| cg26113512 | 3  | 38,035,601  | 0.022213 | 0.298 | 0.127 | 6.78E-09 | 0.188 |  | <i>VILL</i>     | Body    |
| cg27031435 | 15 | 37,403,184  | 0.0226   | 0.298 | 0.208 |          |       |  |                 |         |
| cg15280358 | 10 | 127,904,472 | 4.37E-12 | 0.298 | 0.286 |          |       |  | <i>ADAM12</i>   | Body    |
| cg11365617 | 12 | 110,174,620 | 1.53E-08 | 0.298 | 0.290 |          |       |  | <i>MGC14436</i> | Body    |
| cg12149299 | 12 | 96,762,309  | 5.53E-15 | 0.298 | 0.303 |          |       |  | <i>CDK17</i>    | 5'UTR   |
| cg14885762 | 17 | 75,446,450  | 6.08E-09 | 0.298 | 0.224 |          |       |  | <i>SEPT9</i>    | TSS200  |
| cg23722334 | X  | 106,515,943 | 0.000605 | 0.298 | 0.330 |          |       |  |                 |         |
| cg11386011 | 6  | 32,121,156  | 8.22E-07 | 0.298 | 0.329 |          |       |  | <i>PPT2</i>     | TSS200  |
| cg02541592 | 22 | 45,608,686  | 1.27E-07 | 0.298 | 0.264 |          |       |  | <i>C22orf9</i>  | Body    |
| cg14227486 | 4  | 41,867,415  | 4.61E-06 | 0.298 | 0.321 |          |       |  |                 |         |
| cg07216036 | 12 | 132,950,611 | 0.049407 | 0.298 | 0.343 |          |       |  |                 |         |
| cg13291283 | 17 | 10,101,195  | 0.009199 | 0.298 | 0.229 |          |       |  | <i>GAS7</i>     | Body    |
| cg01187920 | 5  | 71,015,162  | 3.29E-07 | 0.298 | 0.272 |          |       |  | <i>CARTPT</i>   | 1stExon |
| cg04166042 | 1  | 50,896,246  | 2.23E-08 | 0.298 | 0.267 |          |       |  |                 |         |
| cg03628000 | 16 | 14,596,062  | 8.1E-11  | 0.298 | 0.334 |          |       |  | <i>PARN</i>     | Body    |
| cg09444392 | 5  | 179,781,245 | 0.001856 | 0.298 | 0.268 |          |       |  | <i>GFPT2</i>    | TSS1500 |
| cg18665334 | 2  | 231,735,434 | 3.32E-13 | 0.298 | 0.282 |          |       |  | <i>ITM2C</i>    | Body    |
| cg16353006 | 1  | 197,882,469 | 0.002122 | 0.298 | 0.318 |          |       |  | <i>LHX9</i>     | Body    |
| cg19869035 | 7  | 2,653,955   | 7.59E-09 | 0.298 | 0.261 |          |       |  | <i>IQCE</i>     | 3'UTR   |
| cg07723510 | 6  | 30,228,063  | 8.59E-05 | 0.297 | 0.289 |          |       |  | <i>HLA-L</i>    | Body    |
| cg00497232 | 4  | 6,665,905   | 1.8E-10  | 0.297 | 0.288 |          |       |  |                 |         |
| cg03210314 | 16 | 22,959,594  | 5.03E-05 | 0.297 | 0.286 |          |       |  |                 |         |
| cg20323175 | 12 | 68,758,857  | 1.28E-05 | 0.297 | 0.261 |          |       |  |                 |         |
| cg00797821 | 16 | 49,888,944  | 0.023614 | 0.297 | 0.209 |          |       |  |                 |         |
| cg03847716 | 22 | 30,938,483  | 0.017805 | 0.297 | 0.210 |          |       |  |                 |         |
| cg13571479 | 7  | 2,077,345   | 3.63E-13 | 0.297 | 0.322 |          |       |  | <i>MAD1L1</i>   | Body    |
| cg20151221 | 11 | 325,030     | 3.36E-14 | 0.297 | 0.279 |          |       |  |                 |         |
| cg08369368 | 5  | 176,559,881 | 6.92E-08 | 0.297 | 0.286 |          |       |  | <i>NSD1</i>     | TSS200  |

|            |    |             |          |       |       |            |       |  |                     |         |
|------------|----|-------------|----------|-------|-------|------------|-------|--|---------------------|---------|
| cg08402365 | 2  | 172,945,274 | 6.12E-08 | 0.297 | 0.255 |            |       |  | <i>MAP1D</i>        | 3'UTR   |
| cg09746279 | 6  | 29,895,016  | 5.5E-05  | 0.297 | 0.276 |            |       |  |                     |         |
| cg22777979 | 11 | 134,283,252 | 2.93E-08 | 0.297 | 0.313 |            |       |  | <i>B3GAT1</i>       | TSS1500 |
| cg17319007 | 14 | 92,414,300  | 0.024282 | 0.297 | 0.127 |            |       |  | <i>FBLN5</i>        | TSS1500 |
| cg05495546 | 5  | 113,390,551 | 3.89E-12 | 0.297 | 0.285 |            |       |  |                     |         |
| cg08291098 | 20 | 62,285,239  | 6.38E-05 | 0.297 | 0.202 | 1.2E-16    | 0.133 |  | <i>STMN3</i>        | TSS1500 |
| cg14045872 | 7  | 49,813,065  | 0.049439 | 0.297 | 0.340 |            |       |  | <i>VWC2</i>         | TSS200  |
| cg08929399 | 3  | 151,778,972 | 4.62E-13 | 0.297 | 0.267 |            |       |  |                     |         |
| cg03407747 | 17 | 6,899,364   | 9.12E-07 | 0.297 | 0.234 |            |       |  | <i>ALOX12</i>       | TSS200  |
| cg04223044 | 22 | 45,608,428  | 2.9E-05  | 0.297 | 0.264 |            |       |  | <i>C22orf9</i>      | Body    |
| cg26453588 | 22 | 43,506,021  | 5.16E-20 | 0.297 | 0.276 | 5.36E-26   | 0.234 |  | <i>BIK</i>          | TSS1500 |
| cg05310249 | 8  | 23,560,590  | 0.008482 | 0.297 | 0.226 |            |       |  | <i>NKX2-6</i>       | Body    |
| cg02232839 | 1  | 156,404,965 | 2.39E-05 | 0.297 | 0.341 |            |       |  |                     |         |
| cg03149565 | 4  | 109,092,769 | 0.041636 | 0.297 | 0.365 |            |       |  | <i>LOC641518</i>    | TSS1500 |
| cg23287547 | 15 | 52,820,479  | 0.000406 | 0.297 | 0.175 | 0.00000187 | 0.086 |  | <i>MYO5A</i>        | Body    |
| cg00875805 | 4  | 140,656,749 | 4.57E-06 | 0.297 | 0.299 |            |       |  | <i>MAML3</i>        | Body    |
| cg04219946 | 7  | 87,104,724  | 1.77E-05 | 0.297 | 0.238 |            |       |  | <i>ABCB4</i>        | Body    |
| cg13691247 | 12 | 54,071,090  | 0.015172 | 0.297 | 0.269 |            |       |  | <i>ATP5G2</i>       | TSS1500 |
| cg06802522 | 8  | 124,173,231 | 0.000657 | 0.297 | 0.256 |            |       |  |                     |         |
| cg09142578 | 17 | 79,140,486  | 2.05E-05 | 0.297 | 0.236 |            |       |  | <i>AATK</i>         | TSS1500 |
| cg17495250 | 5  | 2,727,907   | 0.000265 | 0.297 | 0.300 |            |       |  |                     |         |
| cg24115040 | 7  | 96,652,375  | 7.95E-05 | 0.297 | 0.279 | 2.62E-15   | 0.252 |  | <i>DLX5</i>         | Body    |
| cg02640604 | 16 | 29,690,271  | 3.92E-29 | 0.297 | 0.315 |            |       |  | <i>QPRT</i>         | TSS200  |
| cg06357561 | 17 | 40,439,501  | 7.77E-10 | 0.297 | 0.268 |            |       |  | <i>STAT5A</i>       | TSS200  |
| cg07263235 | 8  | 19,796,394  | 1.77E-05 | 0.297 | 0.228 |            |       |  | <i>LPL</i>          | TSS200  |
| cg09157176 | 11 | 44,599,232  | 8.22E-10 | 0.297 | 0.239 |            |       |  | <i>CD82</i>         | 5'UTR   |
| cg14630206 | 11 | 77,121,864  | 7.42E-15 | 0.297 | 0.290 |            |       |  | <i>PAK1</i>         | 5'UTR   |
| cg15070894 | 6  | 29,894,162  | 3.73E-09 | 0.297 | 0.291 |            |       |  | <i>HCG4P6</i>       | TSS1500 |
| cg25735648 | 15 | 35,998,009  | 1.11E-08 | 0.297 | 0.318 |            |       |  |                     |         |
| cg27272235 | 1  | 221,061,070 | 1.49E-05 | 0.297 | 0.224 |            |       |  |                     |         |
| cg22627841 | 17 | 48,546,258  | 1.95E-06 | 0.297 | 0.273 |            |       |  | <i>CHAD</i>         | TSS200  |
| cg00514609 | 11 | 111,783,348 | 0.001425 | 0.297 | 0.379 |            |       |  | <i>CRYAB</i>        | TSS1500 |
| cg19113530 | 2  | 178,257,923 | 0.006783 | 0.297 | 0.201 |            |       |  | <i>LOC100130691</i> | TSS1500 |
| cg14346208 | 11 | 35,547,548  | 0.002283 | 0.297 | 0.276 |            |       |  | <i>PAMR1</i>        | TSS1500 |



|            |    |             |          |       |       |          |       |     |                  |         |
|------------|----|-------------|----------|-------|-------|----------|-------|-----|------------------|---------|
| cg08041308 | 17 | 73,028,425  | 0.001286 | 0.297 | 0.243 |          |       |     |                  |         |
| cg11231958 | 1  | 9,509,421   | 7.2E-06  | 0.297 | 0.277 |          |       |     |                  |         |
| cg19604907 | 12 | 50,444,723  | 2.16E-06 | 0.297 | 0.252 |          |       |     |                  |         |
| cg07394266 | 9  | 71,155,970  | 2.5E-19  | 0.297 | 0.285 |          |       |     | <i>C9orf71</i>   | TSS200  |
| cg22753382 | 4  | 3,660,005   | 0.007922 | 0.297 | 0.138 |          |       |     |                  |         |
| cg10020356 | 17 | 7,906,042   | 0.004894 | 0.297 | 0.364 |          |       |     | <i>GUCY2D</i>    | 1stExon |
| cg08901901 | 1  | 160,951,907 | 0.002222 | 0.297 | 0.295 |          |       |     |                  |         |
| cg11097433 | 10 | 108,924,557 | 0.003408 | 0.297 | 0.369 |          |       |     | <i>SORCS1</i>    | TSS1500 |
| cg00109344 | 9  | 116,344,532 | 2.27E-12 | 0.297 | 0.289 |          |       |     | <i>RGS3</i>      | Body    |
| cg01233722 | 14 | 24,838,126  | 4.58E-13 | 0.297 | 0.256 |          |       |     | <i>NFATC4</i>    | Body    |
| cg17142183 | 2  | 102,608,192 | 5.85E-06 | 0.297 | 0.265 | 2.96E-11 | 0.262 |     | <i>IL1R2</i>     | TSS200  |
| cg25058482 | 2  | 161,993,315 | 4.8E-05  | 0.297 | 0.292 |          |       |     | <i>TANK</i>      | TSS200  |
| cg03216846 | 1  | 119,543,883 | 1.64E-09 | 0.297 | 0.268 |          |       |     |                  |         |
| cg04176888 | 19 | 41,596,066  | 3.23E-05 | 0.297 | 0.305 |          |       |     | <i>CYP2A13</i>   | Body    |
| cg14381908 | 10 | 43,697,817  | 1.26E-07 | 0.297 | 0.261 |          |       | Yes | <i>RASGEF1A</i>  | Body    |
| cg11590053 | 6  | 41,343,459  | 0.02671  | 0.297 | 0.421 |          |       |     |                  |         |
| cg02305377 | 12 | 103,355,958 | 0.028028 | 0.297 | 0.281 |          |       |     |                  |         |
| cg06911110 | 1  | 17,293,971  | 2.27E-17 | 0.297 | 0.281 |          |       |     | <i>CROCC</i>     | Body    |
| cg23499956 | 1  | 153,584,920 | 1.88E-12 | 0.297 | 0.315 | 8.93E-32 | 0.168 |     | <i>S100A16</i>   | 5'UTR   |
| cg24293507 | 1  | 10,511,793  | 4.95E-06 | 0.297 | 0.243 |          |       |     | <i>APITD1</i>    | 3'UTR   |
| cg26337998 | 5  | 140,749,783 | 0.011449 | 0.297 | 0.371 |          |       |     | <i>PCDHGA4</i>   | Body    |
| cg07372520 | 1  | 180,086,434 | 6.15E-38 | 0.297 | 0.273 |          |       |     |                  |         |
| cg08409482 | X  | 132,551,364 | 0.000467 | 0.297 | 0.265 |          |       |     |                  |         |
| cg01414185 | 2  | 177,017,449 | 2.3E-08  | 0.297 | 0.235 |          |       |     | <i>HOXD4</i>     | Body    |
| cg00982919 | 9  | 126,775,263 | 8.85E-12 | 0.297 | 0.314 |          |       |     | <i>LHX2</i>      | Body    |
| cg18438944 | 16 | 56,672,525  | 7.13E-06 | 0.297 | 0.293 |          |       |     | <i>MT1A</i>      | TSS200  |
| cg09981361 | 8  | 109,206,108 | 7.51E-07 | 0.297 | 0.307 |          |       |     |                  |         |
| cg04908077 | 3  | 150,187,338 | 7.24E-11 | 0.297 | 0.343 |          |       |     |                  |         |
| cg15261247 | 7  | 129,425,731 | 9.09E-06 | 0.296 | 0.297 |          |       |     |                  |         |
| cg00393825 | 20 | 42,137,061  | 1.29E-05 | 0.296 | 0.298 |          |       |     |                  |         |
| cg06487301 | 19 | 11,531,313  | 0.000738 | 0.296 | 0.300 |          |       |     | <i>RGL3</i>      | TSS1500 |
| cg21642176 | 2  | 17,699,740  | 0.019902 | 0.296 | 0.305 |          |       |     | <i>RAD51AP2</i>  | TSS200  |
| cg01774894 | 17 | 46,674,395  | 4.75E-06 | 0.296 | 0.289 |          |       |     | <i>LOC404266</i> | Body    |
| cg20744163 | 10 | 80,999,841  | 4.3E-15  | 0.296 | 0.308 |          |       |     | <i>ZMIZ1</i>     | Body    |

|            |    |             |          |       |       |          |       |  |                 |         |
|------------|----|-------------|----------|-------|-------|----------|-------|--|-----------------|---------|
| cg16446288 | 7  | 98,424,232  | 1.81E-06 | 0.296 | 0.294 |          |       |  |                 |         |
| cg26855801 | 2  | 45,176,983  | 0.000132 | 0.296 | 0.181 |          |       |  |                 |         |
| cg20300343 | 1  | 149,719,461 | 3.5E-08  | 0.296 | 0.303 |          |       |  |                 |         |
| cg07157830 | 1  | 236,228,741 | 0.015728 | 0.296 | 0.116 |          |       |  | <i>NID1</i>     | TSS1500 |
| cg25947878 | 2  | 20,068,702  | 0.018267 | 0.296 | 0.155 |          |       |  |                 |         |
| cg06609866 | 3  | 57,929,568  | 4.73E-27 | 0.296 | 0.282 |          |       |  |                 |         |
| cg07483244 | 13 | 95,358,924  | 3.88E-06 | 0.296 | 0.267 |          |       |  |                 |         |
| cg27416337 | 3  | 32,748,004  | 9.49E-14 | 0.296 | 0.307 |          |       |  | <i>CNOT10</i>   | Body    |
| cg11935153 | 6  | 30,923,306  | 0.012445 | 0.296 | 0.373 |          |       |  |                 |         |
| cg08280468 | 16 | 12,997,534  | 4.11E-09 | 0.296 | 0.289 |          |       |  | <i>SHISA9</i>   | Body    |
| cg21655710 | 1  | 54,856,511  | 4.7E-12  | 0.296 | 0.269 |          |       |  | <i>SSBP3</i>    | Body    |
| cg23901918 | 10 | 105,420,747 | 2.22E-10 | 0.296 | 0.232 |          |       |  | <i>SH3PXD2A</i> | Body    |
| cg27252696 | 6  | 100,912,940 | 0.012425 | 0.296 | 0.358 |          |       |  | <i>SIM1</i>     | TSS1500 |
| cg02779016 | 15 | 43,809,689  | 3.2E-08  | 0.296 | 0.275 |          |       |  | <i>MAP1A</i>    | TSS200  |
| cg09237846 | 12 | 105,114,399 | 1.54E-08 | 0.296 | 0.277 |          |       |  | <i>CHST11</i>   | Body    |
| cg06775523 | 1  | 3,514,921   | 1.71E-09 | 0.296 | 0.291 |          |       |  | <i>MEGF6</i>    | Body    |
| cg18337363 | 3  | 52,569,053  | 1.92E-09 | 0.296 | 0.234 |          |       |  | <i>NT5DC2</i>   | 5'UTR   |
| cg23752000 | 17 | 78,442,298  | 0.000436 | 0.296 | 0.236 |          |       |  | <i>NPTX1</i>    | 3'UTR   |
| cg25046720 | 4  | 183,801,938 | 3.83E-09 | 0.296 | 0.328 |          |       |  |                 |         |
| cg00612595 | 21 | 47,717,864  | 1.35E-09 | 0.296 | 0.294 |          |       |  |                 |         |
| cg04293307 | 17 | 63,553,581  | 1.08E-09 | 0.296 | 0.235 |          |       |  | <i>AXIN2</i>    | Body    |
| cg16640855 | 2  | 182,543,233 | 0.001794 | 0.296 | 0.228 |          |       |  | <i>NEUROD1</i>  | Body    |
| cg02640104 | 13 | 30,476,615  | 3.34E-10 | 0.296 | 0.305 |          |       |  |                 |         |
| cg11288144 | 6  | 30,649,909  | 1.17E-05 | 0.296 | 0.312 |          |       |  | <i>KIAA1949</i> | Body    |
| cg24268343 | X  | 56,260,186  | 2.66E-15 | 0.296 | 0.298 |          |       |  | <i>KLF8</i>     | Body    |
| cg17237063 | 3  | 29,323,182  | 0.002452 | 0.296 | 0.342 | 1.37E-20 | 0.200 |  | <i>RBMS3</i>    | 1stExon |
| cg02059626 | 8  | 76,319,264  | 1.18E-07 | 0.296 | 0.276 |          |       |  |                 |         |
| cg09505809 | 1  | 180,123,222 | 4.74E-12 | 0.296 | 0.278 |          |       |  | <i>QSOX1</i>    | TSS1500 |
| cg22481950 | 6  | 161,395,786 | 4.43E-10 | 0.296 | 0.305 |          |       |  |                 |         |
| cg15984661 | 19 | 46,916,520  | 6.3E-05  | 0.296 | 0.310 | 1.92E-10 | 0.142 |  | <i>CCDC8</i>    | 1stExon |
| cg06590173 | 19 | 16,189,360  | 0.001015 | 0.296 | 0.266 |          |       |  | <i>TPM4</i>     | Body    |
| cg23571457 | X  | 101,907,558 | 4.15E-13 | 0.296 | 0.285 | 8.52E-29 | 0.204 |  | <i>GPRASP1</i>  | 5'UTR   |
| cg15754153 | 2  | 43,865,055  | 2.56E-05 | 0.296 | 0.304 |          |       |  | <i>PLEKHH2</i>  | 5'UTR   |
| cg19381811 | 3  | 49,851,713  | 1.77E-14 | 0.296 | 0.287 |          |       |  | <i>UBA7</i>     | TSS1500 |

|            |    |             |          |       |       |          |       |  |                  |         |
|------------|----|-------------|----------|-------|-------|----------|-------|--|------------------|---------|
| cg13297960 | 21 | 22,370,237  | 2.24E-05 | 0.296 | 0.311 |          |       |  | <i>NCAM2</i>     | TSS1500 |
| cg10616216 | 11 | 128,321,662 | 3.31E-24 | 0.296 | 0.296 |          |       |  |                  |         |
| cg12608692 | 5  | 16,742,020  | 3.01E-26 | 0.296 | 0.291 |          |       |  | <i>MYO10</i>     | Body    |
| cg21781979 | 13 | 100,547,292 | 0.001642 | 0.296 | 0.216 |          |       |  | <i>CLYBL</i>     | 3'UTR   |
| cg03220945 | 1  | 205,537,877 | 0.000133 | 0.296 | 0.179 |          |       |  | <i>MFSD4</i>     | TSS1500 |
| cg10521153 | 1  | 91,307,077  | 0.000102 | 0.296 | 0.362 |          |       |  |                  |         |
| cg26917694 | 1  | 221,061,058 | 6.51E-05 | 0.296 | 0.227 |          |       |  |                  |         |
| cg00930873 | 15 | 58,357,973  | 9.93E-06 | 0.296 | 0.293 | 2.57E-15 | 0.159 |  | <i>ALDH1A2</i>   | TSS200  |
| cg04270048 | 20 | 33,296,729  | 3.62E-10 | 0.296 | 0.211 |          |       |  | <i>TP53INP2</i>  | Body    |
| cg04242021 | 8  | 121,137,288 | 0.002025 | 0.296 | 0.243 |          |       |  | <i>COL14A1</i>   | TSS200  |
| cg09969277 | 15 | 89,922,328  | 2.88E-05 | 0.296 | 0.265 |          |       |  | <i>LOC254559</i> | Body    |
| cg10043253 | 17 | 6,616,425   | 0.002604 | 0.296 | 0.346 |          |       |  | <i>SLC13A5</i>   | Body    |
| cg26175971 | 2  | 219,647,167 | 5.54E-05 | 0.296 | 0.202 |          |       |  | <i>CYP27A1</i>   | Body    |
| cg23031975 | 2  | 67,601,521  | 5.11E-24 | 0.296 | 0.248 |          |       |  |                  |         |
| cg25150953 | 4  | 41,540,229  | 2.16E-11 | 0.296 | 0.314 |          |       |  | <i>LIMCH1</i>    | Body    |
| cg00670942 | 17 | 74,836,683  | 2.45E-07 | 0.296 | 0.316 |          |       |  |                  |         |
| cg05917460 | 14 | 37,126,902  | 5.62E-09 | 0.296 | 0.300 |          |       |  | <i>PAX9</i>      | 1stExon |
| cg19853364 | 2  | 99,082,357  | 4.85E-18 | 0.296 | 0.278 |          |       |  | <i>INPP4A</i>    | 5'UTR   |
| cg08551725 | 7  | 30,029,776  | 0.014143 | 0.296 | 0.141 |          |       |  | <i>SCRN1</i>     | TSS1500 |
| cg20584157 | 3  | 64,149,428  | 2.75E-11 | 0.296 | 0.287 |          |       |  | <i>PRICKLE2</i>  | Body    |
| cg17718302 | 6  | 27,858,637  | 0.000317 | 0.296 | 0.321 | 5.02E-20 | 0.228 |  | <i>HIST1H3J</i>  | TSS200  |
| cg09608652 | 16 | 53,105,688  | 1.18E-10 | 0.296 | 0.278 |          |       |  | <i>CHD9</i>      | 5'UTR   |
| cg12535476 | 6  | 55,691,833  | 3.15E-17 | 0.296 | 0.244 |          |       |  | <i>BMP5</i>      | Body    |
| cg27616661 | 16 | 2,040,981   | 0.00467  | 0.296 | 0.390 |          |       |  | <i>SYNGR3</i>    | Body    |
| cg22410382 | X  | 134,124,941 | 0.008155 | 0.296 | 0.299 |          |       |  | <i>LOC644538</i> | TSS200  |
| cg27315157 | 1  | 79,086,197  | 0.000158 | 0.296 | 0.185 |          |       |  | <i>IFI44L</i>    | 5'UTR   |
| cg01901262 | 16 | 54,966,837  | 0.002266 | 0.296 | 0.339 |          |       |  | <i>IRX5</i>      | Body    |
| cg01937840 | 5  | 11,588,971  | 6.68E-08 | 0.296 | 0.294 |          |       |  | <i>CTNND2</i>    | Body    |
| cg03753331 | 2  | 115,919,006 | 0.014375 | 0.296 | 0.302 |          |       |  | <i>DPP10</i>     | TSS1500 |
| cg26667946 | 13 | 46,425,874  | 0.00099  | 0.296 | 0.269 |          |       |  | <i>SIAH3</i>     | TSS200  |
| cg01638193 | 14 | 68,571,056  | 1.93E-16 | 0.296 | 0.297 |          |       |  | <i>RAD51L1</i>   | Body    |
| cg23795217 | 12 | 54,812,000  | 1.31E-06 | 0.296 | 0.287 |          |       |  | <i>ITGA5</i>     | Body    |
| cg08164484 | 1  | 58,713,941  | 1.83E-07 | 0.296 | 0.266 |          |       |  | <i>DAB1</i>      | 5'UTR   |
| cg19755318 | 3  | 50,243,323  | 1.24E-09 | 0.296 | 0.257 |          |       |  | <i>SLC38A3</i>   | 5'UTR   |

|            |    |             |          |       |       |  |  |  |                  |         |
|------------|----|-------------|----------|-------|-------|--|--|--|------------------|---------|
| cg07921371 | 13 | 20,768,536  | 6.23E-08 | 0.296 | 0.264 |  |  |  | <i>GJB2</i>      | TSS1500 |
| cg04056576 | 3  | 160,475,090 | 1.06E-09 | 0.296 | 0.296 |  |  |  | <i>PPM1L</i>     | Body    |
| cg10712173 | 4  | 8,271,414   | 0.001263 | 0.296 | 0.237 |  |  |  | <i>HTRA3</i>     | TSS200  |
| cg17214107 | 4  | 123,747,542 | 4.71E-09 | 0.296 | 0.276 |  |  |  | <i>FGF2</i>      | TSS1500 |
| cg01141459 | 22 | 30,476,452  | 1.08E-12 | 0.296 | 0.292 |  |  |  | <i>HORMAD2</i>   | 1stExon |
| cg09282497 | 2  | 18,059,200  | 0.021661 | 0.296 | 0.164 |  |  |  | <i>KCNS3</i>     | TSS1500 |
| cg12972233 | 9  | 91,605,893  | 1.51E-19 | 0.296 | 0.278 |  |  |  | <i>C9orf47</i>   | 1stExon |
| cg25594899 | 1  | 1,182,226   | 0.035813 | 0.295 | 0.380 |  |  |  | <i>FAM132A</i>   | TSS200  |
| cg15616310 | 11 | 94,570,647  | 1.73E-18 | 0.295 | 0.287 |  |  |  | <i>AMOTL1</i>    | Body    |
| cg10789281 | 12 | 81,471,882  | 0.000153 | 0.295 | 0.280 |  |  |  | <i>ACSS3</i>     | 1stExon |
| cg05447023 | 15 | 40,531,952  | 3.39E-07 | 0.295 | 0.290 |  |  |  | <i>PAK6</i>      | 5'UTR   |
| cg15678825 | 18 | 77,266,975  | 3.86E-13 | 0.295 | 0.266 |  |  |  | <i>NFATC1</i>    | Body    |
| cg04257984 | 2  | 171,568,984 | 0.002482 | 0.295 | 0.211 |  |  |  | <i>LOC440925</i> | Body    |
| cg25756780 | 2  | 121,345,047 | 1.39E-33 | 0.295 | 0.274 |  |  |  |                  |         |
| cg00986824 | 12 | 75,601,465  | 0.001374 | 0.295 | 0.234 |  |  |  | <i>KCNC2</i>     | Body    |
| cg21301805 | 1  | 119,534,644 | 4.54E-07 | 0.295 | 0.332 |  |  |  |                  |         |
| cg03199651 | 4  | 4,862,770   | 9.17E-08 | 0.295 | 0.284 |  |  |  | <i>MSX1</i>      | Body    |
| cg08003102 | 4  | 88,451,496  | 2.75E-10 | 0.295 | 0.284 |  |  |  | <i>SPARCL1</i>   | TSS1500 |
| cg04602939 | 20 | 62,184,207  | 2.36E-05 | 0.295 | 0.314 |  |  |  | <i>C20orf195</i> | TSS200  |
| cg16188209 | 12 | 103,311,596 | 0.002123 | 0.295 | 0.151 |  |  |  | <i>PAH</i>       | TSS1500 |
| cg10547969 | 17 | 35,084,975  | 0.003158 | 0.295 | 0.298 |  |  |  |                  |         |
| cg18926212 | 12 | 50,297,936  | 0.002096 | 0.295 | 0.261 |  |  |  | <i>FAIM2</i>     | TSS1500 |
| cg20907456 | 11 | 57,405,372  | 3.37E-24 | 0.295 | 0.270 |  |  |  |                  |         |
| cg25761326 | 10 | 11,206,792  | 0.006128 | 0.295 | 0.183 |  |  |  | <i>CUGBP2</i>    | TSS200  |
| cg11480627 | 11 | 70,672,876  | 1.9E-16  | 0.295 | 0.273 |  |  |  | <i>SHANK2</i>    | Body    |
| cg01363736 | 20 | 37,172,289  | 9.23E-11 | 0.295 | 0.267 |  |  |  | <i>RALGAPB</i>   | Body    |
| cg23480730 | 14 | 33,402,027  | 5.56E-07 | 0.295 | 0.292 |  |  |  |                  |         |
| cg15360478 | 2  | 43,094,440  | 1.93E-22 | 0.295 | 0.290 |  |  |  |                  |         |
| cg20024403 | 17 | 81,039,326  | 0.000165 | 0.295 | 0.236 |  |  |  | <i>METRNL</i>    | Body    |
| cg23172664 | 6  | 86,169,204  | 6.04E-10 | 0.295 | 0.305 |  |  |  | <i>NT5E</i>      | Body    |
| cg02792740 | 6  | 2,876,395   | 0.000444 | 0.295 | 0.303 |  |  |  |                  |         |
| cg12996913 | 3  | 72,338,454  | 0.030293 | 0.295 | 0.137 |  |  |  |                  |         |
| cg07537443 | 17 | 47,572,132  | 2.65E-32 | 0.295 | 0.255 |  |  |  | <i>NGFR</i>      | TSS1500 |
| cg03861427 | 6  | 29,855,325  | 2.09E-15 | 0.295 | 0.265 |  |  |  | <i>HLA-H</i>     | TSS200  |

|            |    |             |          |       |       |          |       |  |     |                  |         |
|------------|----|-------------|----------|-------|-------|----------|-------|--|-----|------------------|---------|
| cg05890484 | 5  | 78,407,552  | 1.63E-11 | 0.295 | 0.285 | 1.74E-24 | 0.238 |  |     | <i>BHMT</i>      | TSS200  |
| cg23049458 | 1  | 62,660,624  | 0.001249 | 0.295 | 0.282 |          |       |  |     | <i>L1TD1</i>     | 5'UTR   |
| cg01513307 | 6  | 108,479,557 | 0.001302 | 0.295 | 0.293 |          |       |  |     |                  |         |
| cg09070799 | 6  | 151,561,236 | 0.000111 | 0.295 | 0.173 |          |       |  |     | <i>AKAP12</i>    | 5'UTR   |
| cg18793404 | 7  | 52,156,489  | 6.39E-05 | 0.295 | 0.248 |          |       |  |     |                  |         |
| cg22877570 | 3  | 171,175,950 | 5.98E-07 | 0.295 | 0.328 |          |       |  |     | <i>TNIK</i>      | Body    |
| cg12198841 | 5  | 115,941,397 | 5.77E-19 | 0.295 | 0.275 |          |       |  |     |                  |         |
| cg13921605 | 9  | 133,808,174 | 2.18E-12 | 0.295 | 0.307 |          |       |  |     | <i>FIBCD1</i>    | Body    |
| cg25193276 | 1  | 41,901,646  | 1.79E-11 | 0.295 | 0.283 |          |       |  |     |                  |         |
| cg14097568 | 1  | 94,792,942  | 2.13E-08 | 0.295 | 0.235 |          |       |  |     |                  |         |
| cg01968657 | 1  | 237,207,256 | 0.016064 | 0.295 | 0.197 |          |       |  |     | <i>RYR2</i>      | Body    |
| cg25165701 | 3  | 151,985,697 | 4.98E-08 | 0.295 | 0.299 |          |       |  |     | <i>LOC401093</i> | Body    |
| cg12345672 | 7  | 127,672,658 | 1.98E-05 | 0.295 | 0.305 |          |       |  |     | <i>SND1</i>      | Body    |
| cg01661350 | 13 | 70,682,098  | 0.00127  | 0.295 | 0.284 |          |       |  |     | <i>KLHL1</i>     | 1stExon |
| cg06152586 | 7  | 157,890,659 | 1.28E-13 | 0.295 | 0.266 |          |       |  | Yes | <i>PTPRN2</i>    | Body    |
| cg17545346 | 6  | 28,956,609  | 1.85E-08 | 0.295 | 0.304 |          |       |  |     |                  |         |
| cg18702689 | 4  | 110,223,138 | 0.004805 | 0.295 | 0.350 |          |       |  |     | <i>COL25A1</i>   | Body    |
| cg26075747 | 6  | 30,457,407  | 3.02E-16 | 0.295 | 0.289 |          |       |  |     | <i>HLA-E</i>     | Body    |
| cg10320410 | 7  | 64,343,315  | 0.023315 | 0.295 | 0.166 |          |       |  |     |                  |         |
| cg16849268 | 8  | 125,721,998 | 0.000241 | 0.295 | 0.240 |          |       |  |     | <i>MTSS1</i>     | Body    |
| cg10418289 | 14 | 23,308,294  | 1.62E-16 | 0.295 | 0.294 |          |       |  |     | <i>MMP14</i>     | Body    |
| cg20216655 | 6  | 2,665,911   | 3.5E-06  | 0.295 | 0.250 |          |       |  |     | <i>MYLK4</i>     | 3'UTR   |
| cg22867816 | 4  | 16,081,205  | 8.37E-23 | 0.295 | 0.277 |          |       |  |     | <i>PROM1</i>     | 5'UTR   |
| cg01630690 | 14 | 36,992,001  | 0.000328 | 0.295 | 0.368 |          |       |  |     |                  |         |
| cg04713531 | 7  | 158,197,288 | 4.17E-12 | 0.295 | 0.294 |          |       |  |     | <i>PTPRN2</i>    | Body    |
| cg10879397 | 5  | 148,555,266 | 5.54E-21 | 0.295 | 0.288 |          |       |  |     | <i>ABLIM3</i>    | Body    |
| cg13759852 | 17 | 8,056,985   | 1.55E-20 | 0.295 | 0.299 |          |       |  |     | <i>PER1</i>      | TSS1500 |
| cg26234658 | 7  | 36,343,787  | 4.3E-16  | 0.295 | 0.258 |          |       |  |     |                  |         |
| cg15701237 | 3  | 187,086,154 | 0.006807 | 0.295 | 0.115 |          |       |  |     | <i>RTP4</i>      | TSS200  |
| cg12120292 | 17 | 3,867,227   | 0.002628 | 0.295 | 0.253 |          |       |  |     | <i>ATP2A3</i>    | Body    |
| cg02773086 | 2  | 177,027,440 | 0.001214 | 0.295 | 0.181 |          |       |  |     | <i>HOXD3</i>     | TSS1500 |
| cg14458932 | 20 | 45,439,805  | 3.85E-08 | 0.295 | 0.317 |          |       |  |     |                  |         |
| cg17853216 | 10 | 81,002,480  | 0.041006 | 0.295 | 0.175 |          |       |  |     | <i>ZMIZ1</i>     | Body    |
| cg25885684 | 15 | 100,048,426 | 1.25E-06 | 0.295 | 0.241 |          |       |  |     |                  |         |

|            |    |             |          |       |       |          |       |  |                 |         |
|------------|----|-------------|----------|-------|-------|----------|-------|--|-----------------|---------|
| cg09363604 | 4  | 83,675,306  | 1.22E-07 | 0.295 | 0.302 |          |       |  | <i>MIR575</i>   | TSS1500 |
| cg05624862 | 16 | 1,349,657   | 0.002491 | 0.295 | 0.302 |          |       |  |                 |         |
| cg05735180 | 18 | 55,095,177  | 0.01169  | 0.295 | 0.303 |          |       |  |                 |         |
| cg23878906 | 18 | 29,304,818  | 1.42E-07 | 0.295 | 0.269 |          |       |  |                 |         |
| cg13525428 | 2  | 129,076,361 | 3.55E-07 | 0.295 | 0.254 |          |       |  | <i>HS6ST1</i>   | TSS200  |
| cg15103584 | 18 | 56,943,576  | 3.61E-05 | 0.295 | 0.319 |          |       |  |                 |         |
| cg26987855 | 6  | 10,426,637  | 0.001708 | 0.295 | 0.396 |          |       |  |                 |         |
| cg01942226 | 4  | 154,218,350 | 1.53E-08 | 0.295 | 0.249 |          |       |  | <i>TRIM2</i>    | Body    |
| cg17820459 | 5  | 150,400,531 | 0.000176 | 0.295 | 0.143 | 1.02E-14 | 0.197 |  | <i>GPX3</i>     | Body    |
| cg00369811 | 6  | 37,673,597  | 0.012216 | 0.295 | 0.309 |          |       |  |                 |         |
| cg08619932 | 19 | 49,200,058  | 7.54E-06 | 0.295 | 0.293 |          |       |  | <i>FUT2</i>     | 5'UTR   |
| cg12829045 | 10 | 77,228,852  | 8.65E-08 | 0.295 | 0.295 |          |       |  |                 |         |
| cg14838248 | 11 | 64,147,847  | 3.39E-31 | 0.295 | 0.287 |          |       |  |                 |         |
| cg17550566 | 7  | 2,681,436   | 1.77E-16 | 0.295 | 0.294 |          |       |  | <i>TTYH3</i>    | Body    |
| cg23625660 | 5  | 135,266,516 | 6.26E-09 | 0.295 | 0.250 |          |       |  | <i>FBXL21</i>   | 5'UTR   |
| cg07785447 | 14 | 95,235,127  | 0.00823  | 0.295 | 0.336 |          |       |  | <i>GSC</i>      | Body    |
| cg10851413 | 10 | 99,532,174  | 3.91E-05 | 0.295 | 0.304 |          |       |  | <i>SFRP5</i>    | TSS1500 |
| cg13104938 | 11 | 843,956     | 2.79E-09 | 0.295 | 0.235 |          |       |  | <i>TSPAN4</i>   | TSS1500 |
| cg08069249 | 4  | 6,676,075   | 2.29E-19 | 0.294 | 0.301 |          |       |  | <i>LOC93622</i> | Body    |
| cg01461552 | 11 | 20,692,867  | 0.000965 | 0.294 | 0.275 |          |       |  | <i>NELL1</i>    | Body    |
| cg20281962 | 10 | 8,089,733   | 5.2E-05  | 0.294 | 0.272 |          |       |  |                 |         |
| cg07507251 | 3  | 52,567,010  | 0.000604 | 0.294 | 0.147 |          |       |  | <i>NT5DC2</i>   | Body    |
| cg15396686 | 10 | 124,897,048 | 0.000292 | 0.294 | 0.273 |          |       |  | <i>HMX3</i>     | Body    |
| cg18660345 | 20 | 35,169,539  | 2.85E-09 | 0.294 | 0.284 |          |       |  | <i>MYL9</i>     | TSS1500 |
| cg09803951 | 6  | 29,910,796  | 5.89E-07 | 0.294 | 0.289 |          |       |  | <i>HLA-A</i>    | Body    |
| cg23174932 | 6  | 31,831,502  | 2.64E-06 | 0.294 | 0.257 |          |       |  | <i>NEU1</i>     | TSS1500 |
| cg08925720 | 11 | 61,314,936  | 1.36E-65 | 0.294 | 0.291 |          |       |  | <i>SYT7</i>     | Body    |
| cg09550810 | 1  | 61,519,890  | 0.000161 | 0.294 | 0.226 |          |       |  |                 |         |
| cg13756380 | 9  | 135,455,174 | 0.000109 | 0.294 | 0.302 |          |       |  |                 |         |
| cg22723502 | 6  | 26,240,528  | 0.023424 | 0.294 | 0.343 |          |       |  | <i>HIST1H4F</i> | TSS200  |
| cg02649547 | 10 | 95,848,791  | 4.46E-06 | 0.294 | 0.270 |          |       |  | <i>PLCE1</i>    | TSS200  |
| cg04906283 | 14 | 77,965,859  | 3.57E-10 | 0.294 | 0.270 |          |       |  | <i>ISM2</i>     | TSS1500 |
| cg05135644 | 6  | 108,489,795 | 0.000105 | 0.294 | 0.312 |          |       |  | <i>NR2E1</i>    | Body    |
| cg14549256 | 4  | 2,627,142   | 2.95E-19 | 0.294 | 0.305 |          |       |  | <i>FAM193A</i>  | TSS200  |

|            |    |             |          |       |       |          |       |  |                     |         |
|------------|----|-------------|----------|-------|-------|----------|-------|--|---------------------|---------|
| cg07099331 | 10 | 102,419,617 | 0.000716 | 0.294 | 0.305 |          |       |  |                     |         |
| cg13799941 | 7  | 96,632,294  | 2.84E-25 | 0.294 | 0.289 |          |       |  | <i>DLX6AS</i>       | Body    |
| cg11423684 | 6  | 29,691,993  | 4.82E-05 | 0.294 | 0.215 |          |       |  | <i>HLA-F</i>        | Body    |
| cg13605988 | 15 | 45,421,612  | 0.008974 | 0.294 | 0.349 |          |       |  | <i>DUOX1</i>        | TSS1500 |
| cg08072992 | 19 | 14,229,581  | 0.000329 | 0.294 | 0.260 |          |       |  | <i>PRKACA</i>       | TSS1500 |
| cg11609001 | 19 | 18,901,843  | 0.004802 | 0.294 | 0.256 |          |       |  | <i>COMP</i>         | Body    |
| cg16300637 | 14 | 97,059,005  | 0.003975 | 0.294 | 0.234 |          |       |  |                     |         |
| cg01515543 | 9  | 92,254,510  | 2.11E-10 | 0.294 | 0.281 |          |       |  | <i>LOC100129066</i> | TSS200  |
| cg04609635 | 2  | 24,398,695  | 3.25E-06 | 0.294 | 0.247 |          |       |  | <i>C2orf84</i>      | Body    |
| cg07766263 | 3  | 170,303,045 | 6.57E-17 | 0.294 | 0.289 |          |       |  | <i>SLC7A14</i>      | 5'UTR   |
| cg12406391 | 1  | 6,520,194   | 1.01E-07 | 0.294 | 0.280 |          |       |  | <i>ESPN</i>         | Body    |
| cg13888593 | 2  | 74,642,470  | 0.000206 | 0.294 | 0.288 |          |       |  | <i>C2orf81</i>      | Body    |
| cg10008757 | 10 | 8,097,183   | 0.00038  | 0.294 | 0.314 |          |       |  | <i>GATA3</i>        | 5'UTR   |
| cg14615784 | 5  | 94,955,756  | 0.009626 | 0.294 | 0.229 |          |       |  | <i>GPR150</i>       | TSS1500 |
| cg26245697 | 19 | 2,282,203   | 0.024103 | 0.294 | 0.245 |          |       |  | <i>C19orf35</i>     | TSS200  |
| cg15879316 | 22 | 46,934,089  | 0.000388 | 0.294 | 0.166 | 1.94E-14 | 0.077 |  | <i>CELSR1</i>       | TSS1500 |
| cg13338798 | 6  | 28,557,846  | 3.02E-06 | 0.294 | 0.283 |          |       |  |                     |         |
| cg20467412 | 19 | 5,799,340   | 0.000847 | 0.294 | 0.348 |          |       |  |                     |         |
| cg20061654 | 22 | 45,608,492  | 9.54E-08 | 0.294 | 0.273 |          |       |  | <i>C22orf9</i>      | Body    |
| cg10208485 | 3  | 350,602     | 0.02091  | 0.294 | 0.256 |          |       |  | <i>CHL1</i>         | 5'UTR   |
| cg12642693 | X  | 50,556,917  | 0.030655 | 0.294 | 0.304 |          |       |  | <i>SHROOM4</i>      | 1stExon |
| cg01246520 | 17 | 17,644,344  | 1.53E-05 | 0.294 | 0.278 |          |       |  | <i>RAI1</i>         | 5'UTR   |
| cg00959249 | 5  | 95,768,997  | 0.016457 | 0.294 | 0.303 |          |       |  | <i>PCSK1</i>        | TSS200  |
| cg17063929 | 11 | 89,224,799  | 7.16E-10 | 0.294 | 0.265 | 5.11E-30 | 0.241 |  | <i>NOX4</i>         | 5'UTR   |
| cg19507206 | 10 | 103,044,008 | 0.001368 | 0.294 | 0.292 |          |       |  |                     |         |
| cg24751894 | 6  | 29,894,141  | 4.21E-08 | 0.294 | 0.286 |          |       |  | <i>HCG4P6</i>       | TSS1500 |
| cg00748938 | 14 | 94,641,781  | 0.037635 | 0.294 | 0.223 |          |       |  | <i>PPP4R4</i>       | Body    |
| cg09450367 | 2  | 11,294,738  | 8.1E-05  | 0.294 | 0.273 |          |       |  | <i>PQLC3</i>        | TSS1500 |
| cg00668150 | 17 | 2,615,720   | 2.59E-05 | 0.294 | 0.239 |          |       |  | <i>KIAA0664</i>     | TSS1500 |
| cg23405212 | 2  | 208,989,382 | 0.000204 | 0.294 | 0.277 |          |       |  | <i>CRYGD</i>        | TSS200  |
| cg09912512 | 22 | 42,761,285  | 1.48E-20 | 0.294 | 0.281 |          |       |  |                     |         |
| cg09980176 | 19 | 11,532,175  | 7.55E-08 | 0.294 | 0.293 |          |       |  | <i>CCDC151</i>      | Body    |
| cg15736165 | 15 | 83,951,732  | 4.81E-11 | 0.294 | 0.296 | 4.1E-21  | 0.182 |  | <i>BNC1</i>         | Body    |
| cg14913216 | 8  | 145,033,104 | 8.61E-16 | 0.294 | 0.297 |          |       |  | <i>PLEC1</i>        | Body    |

|            |    |             |          |       |       |            |       |  |                  |         |
|------------|----|-------------|----------|-------|-------|------------|-------|--|------------------|---------|
| cg22471255 | 22 | 42,315,642  | 0.020703 | 0.294 | 0.294 |            |       |  |                  |         |
| cg24357619 | 15 | 37,389,384  | 0.000756 | 0.294 | 0.333 |            |       |  | <i>MEIS2</i>     | Body    |
| cg11096993 | 11 | 67,417,958  | 1.3E-11  | 0.294 | 0.283 | 4.56E-24   | 0.200 |  | <i>ACY3</i>      | 5'UTR   |
| cg00174851 | 7  | 134,142,981 | 7.27E-30 | 0.294 | 0.271 |            |       |  | <i>AKR1B1</i>    | Body    |
| cg12232388 | 12 | 125,027,851 | 3.15E-07 | 0.294 | 0.270 |            |       |  |                  |         |
| cg06917763 | 7  | 130,033,247 | 1.64E-22 | 0.294 | 0.295 |            |       |  |                  |         |
| cg11588197 | 11 | 128,391,494 | 1.19E-05 | 0.294 | 0.251 |            |       |  | <i>ETS1</i>      | Body    |
| cg02161900 | 10 | 28,035,631  | 5.56E-10 | 0.294 | 0.306 | 5.61E-27   | 0.236 |  | <i>MKX</i>       | TSS1500 |
| cg03238359 | 11 | 60,623,567  | 6.67E-17 | 0.294 | 0.262 |            |       |  | <i>GPR44</i>     | TSS200  |
| cg08833675 | 8  | 10,586,790  | 2.3E-09  | 0.294 | 0.285 |            |       |  | <i>SOX7</i>      | Body    |
| cg00829858 | 2  | 179,148,245 | 1.43E-19 | 0.294 | 0.284 |            |       |  | <i>OSBPL6</i>    | 5'UTR   |
| cg10286983 | 6  | 24,494,717  | 2.56E-08 | 0.294 | 0.199 |            |       |  | <i>ALDH5A1</i>   | TSS1500 |
| cg00046499 | 3  | 154,146,183 | 0.000294 | 0.294 | 0.276 |            |       |  | <i>GPR149</i>    | Body    |
| cg02104162 | 6  | 4,610,716   | 5.31E-06 | 0.294 | 0.240 |            |       |  |                  |         |
| cg09258804 | 17 | 59,532,564  | 1.81E-08 | 0.294 | 0.258 |            |       |  | <i>TBX4</i>      | TSS1500 |
| cg08906194 | 9  | 34,577,972  | 0.000909 | 0.294 | 0.305 |            |       |  | <i>CNTFR</i>     | 5'UTR   |
| cg13726682 | 17 | 29,718,306  | 0.00037  | 0.294 | 0.245 |            |       |  | <i>RAB11FIP4</i> | TSS1500 |
| cg03018496 | 15 | 96,868,989  | 1.08E-06 | 0.294 | 0.239 |            |       |  | <i>NR2F2</i>     | TSS200  |
| cg12929027 | 12 | 110,150,180 | 1.79E-13 | 0.294 | 0.309 |            |       |  |                  |         |
| cg26371320 | 6  | 28,778,091  | 0.004059 | 0.294 | 0.131 |            |       |  |                  |         |
| cg24940967 | 3  | 45,837,197  | 0.002608 | 0.294 | 0.210 |            |       |  | <i>SLC6A20</i>   | Body    |
| cg00126034 | 17 | 44,896,162  | 1.33E-05 | 0.294 | 0.319 | 2.0478E-05 | 0.111 |  | <i>WNT3</i>      | TSS200  |
| cg07112337 | 16 | 57,917,946  | 0.009113 | 0.294 | 0.247 |            |       |  | <i>CNGB1</i>     | 3'UTR   |
| cg20113824 | 8  | 70,946,946  | 0.001182 | 0.294 | 0.296 |            |       |  |                  |         |
| cg10050661 | 17 | 38,821,420  | 0.002743 | 0.294 | 0.266 |            |       |  | <i>KRT222</i>    | TSS200  |
| cg10856045 | 10 | 73,848,463  | 1.41E-12 | 0.294 | 0.236 |            |       |  | <i>SPOCK2</i>    | 5'UTR   |
| cg12145907 | 5  | 140,864,834 | 6.42E-09 | 0.294 | 0.280 | 1.28E-08   | 0.121 |  | <i>PCDHGA4</i>   | Body    |
| cg21374048 | 17 | 56,013,560  | 1.23E-18 | 0.294 | 0.289 |            |       |  |                  |         |
| cg07974504 | 2  | 220,325,375 | 4.35E-19 | 0.294 | 0.289 |            |       |  | <i>SPEG</i>      | Body    |
| cg05303057 | 17 | 54,756,052  | 0.000799 | 0.294 | 0.343 |            |       |  |                  |         |
| cg18953104 | 6  | 139,613,145 | 5.54E-10 | 0.294 | 0.300 |            |       |  | <i>TXLNB</i>     | 5'UTR   |
| cg05215748 | 17 | 6,898,738   | 7.14E-13 | 0.294 | 0.291 |            |       |  | <i>ALOX12</i>    | TSS1500 |
| cg07026666 | 1  | 204,050,380 | 2.8E-06  | 0.294 | 0.315 |            |       |  | <i>SOX13</i>     | 5'UTR   |
| cg10965575 | 2  | 182,321,496 | 1.65E-07 | 0.294 | 0.226 |            |       |  | <i>ITGA4</i>     | TSS200  |



|            |    |             |          |       |       |          |       |  |                 |         |
|------------|----|-------------|----------|-------|-------|----------|-------|--|-----------------|---------|
| cg00848728 | 1  | 58,716,018  | 6.13E-07 | 0.294 | 0.243 | 2.52E-32 | 0.287 |  | <i>DAB1</i>     | 5'UTR   |
| cg17536166 | 3  | 44,626,697  | 0.000185 | 0.294 | 0.238 |          |       |  | <i>ZNF660</i>   | 5'UTR   |
| cg07687119 | 12 | 54,423,549  | 9.03E-07 | 0.294 | 0.261 |          |       |  | <i>HOXC4</i>    | 5'UTR   |
| cg24717695 | 7  | 156,809,644 | 2.03E-05 | 0.294 | 0.285 |          |       |  |                 |         |
| cg21327194 | 17 | 72,443,018  | 1.56E-14 | 0.294 | 0.295 |          |       |  | <i>GPRC5C</i>   | Body    |
| cg10783371 | 3  | 181,437,548 | 9.47E-06 | 0.294 | 0.344 |          |       |  | <i>SOX20T</i>   | Body    |
| cg00199007 | 20 | 61,583,910  | 2.14E-08 | 0.294 | 0.293 |          |       |  | <i>SLC17A9</i>  | TSS200  |
| cg20881942 | 4  | 154,710,826 | 0.004043 | 0.293 | 0.374 |          |       |  | <i>SFRP2</i>    | TSS1500 |
| cg22560083 | 21 | 36,038,533  | 2.16E-21 | 0.293 | 0.280 |          |       |  |                 |         |
| cg23518541 | 3  | 25,472,652  | 1.56E-11 | 0.293 | 0.314 |          |       |  | <i>RARB</i>     | 5'UTR   |
| cg02001390 | 19 | 5,338,977   | 3.94E-06 | 0.293 | 0.326 |          |       |  | <i>PTPRS</i>    | 5'UTR   |
| cg01821113 | 2  | 218,277,531 | 1.24E-18 | 0.293 | 0.285 |          |       |  | <i>DIRC3</i>    | Body    |
| cg13306921 | 1  | 54,863,529  | 1.05E-18 | 0.293 | 0.270 |          |       |  | <i>SSBP3</i>    | Body    |
| cg14335894 | 17 | 47,075,281  | 0.000419 | 0.293 | 0.277 |          |       |  | <i>IGF2BP1</i>  | 1stExon |
| cg00687714 | 16 | 21,272,887  | 9.29E-14 | 0.293 | 0.308 |          |       |  | <i>CRYM</i>     | Body    |
| cg14940165 | 2  | 177,021,702 | 6.87E-06 | 0.293 | 0.283 |          |       |  |                 |         |
| cg18032164 | 3  | 129,024,676 | 9.59E-20 | 0.293 | 0.271 |          |       |  |                 |         |
| cg14702570 | 2  | 74,259,524  | 3.2E-11  | 0.293 | 0.296 |          |       |  |                 |         |
| cg06241101 | 17 | 77,895,684  | 9.23E-05 | 0.293 | 0.279 |          |       |  |                 |         |
| cg16234557 | 10 | 119,292,062 | 0.027478 | 0.293 | 0.235 |          |       |  | <i>EMX2OS</i>   | Body    |
| cg27165884 | 10 | 99,473,085  | 5.46E-07 | 0.293 | 0.337 |          |       |  | <i>MARVELD1</i> | TSS1500 |
| cg11424376 | 1  | 230,220,668 | 1.47E-20 | 0.293 | 0.279 |          |       |  | <i>GALNT2</i>   | Body    |
| cg26027233 | X  | 75,648,961  | 0.04418  | 0.293 | 0.161 |          |       |  | <i>MAGEE1</i>   | 1stExon |
| cg02693127 | 4  | 148,652,654 | 0.000379 | 0.293 | 0.298 |          |       |  | <i>ARHGAP10</i> | TSS1500 |
| cg27543103 | 4  | 54,975,677  | 1.79E-07 | 0.293 | 0.340 |          |       |  |                 |         |
| cg25580581 | 10 | 3,853,668   | 3.7E-06  | 0.293 | 0.335 |          |       |  |                 |         |
| cg08574629 | 1  | 155,290,542 | 1.88E-07 | 0.293 | 0.238 |          |       |  | <i>RUSC1</i>    | TSS200  |
| cg01837410 | 5  | 101,631,990 | 0.000422 | 0.293 | 0.170 |          |       |  | <i>SLCO4C1</i>  | 1stExon |
| cg10802379 | 5  | 150,400,395 | 0.003552 | 0.293 | 0.117 |          |       |  | <i>GPX3</i>     | Body    |
| cg04611203 | 20 | 2,781,438   | 9.68E-06 | 0.293 | 0.198 |          |       |  | <i>CPXM1</i>    | TSS200  |
| cg14700679 | 2  | 9,898,228   | 5.82E-10 | 0.293 | 0.280 |          |       |  |                 |         |
| cg15443822 | 17 | 3,867,014   | 1.51E-05 | 0.293 | 0.264 | 5.15E-27 | 0.200 |  | <i>ATP2A3</i>   | Body    |
| cg21762523 | 6  | 108,497,717 | 7.51E-05 | 0.293 | 0.296 |          |       |  | <i>NR2E1</i>    | Body    |
| cg13414212 | 2  | 26,624,823  | 0.020736 | 0.293 | 0.097 |          |       |  | <i>C2orf39</i>  | 5'UTR   |

|            |    |             |          |       |       |  |  |     |                |         |
|------------|----|-------------|----------|-------|-------|--|--|-----|----------------|---------|
| cg25191628 | 1  | 50,886,949  | 0.000151 | 0.293 | 0.289 |  |  |     | <i>DMRTA2</i>  | Body    |
| cg17370981 | 13 | 114,311,583 | 0.043113 | 0.293 | 0.130 |  |  | Yes | <i>ATP4B</i>   | Body    |
| cg05224741 | 6  | 10,422,322  | 6.69E-05 | 0.293 | 0.299 |  |  |     |                |         |
| cg06896987 | 2  | 177,003,735 | 5.11E-07 | 0.293 | 0.236 |  |  |     |                |         |
| cg17945789 | 2  | 236,444,284 | 0.002644 | 0.293 | 0.248 |  |  |     | <i>AGAP1</i>   | Body    |
| cg04131799 | 2  | 97,193,006  | 2.99E-11 | 0.293 | 0.298 |  |  |     |                |         |
| cg09926486 | 15 | 44,486,207  | 1.25E-06 | 0.293 | 0.241 |  |  |     | <i>FRMD5</i>   | Body    |
| cg07511668 | 11 | 68,622,177  | 1.61E-08 | 0.293 | 0.306 |  |  |     |                |         |
| cg13640071 | X  | 102,585,147 | 6.96E-08 | 0.293 | 0.306 |  |  |     | <i>TCEAL7</i>  | TSS200  |
| cg18193764 | 5  | 134,879,961 | 1.1E-06  | 0.293 | 0.307 |  |  |     |                |         |
| cg05491854 | 6  | 24,910,562  | 3.55E-05 | 0.293 | 0.299 |  |  |     | <i>FAM65B</i>  | 5'UTR   |
| cg26983835 | 17 | 59,481,280  | 2.53E-10 | 0.293 | 0.293 |  |  |     | <i>TBX2</i>    | Body    |
| cg02639608 | 1  | 68,150,326  | 6.96E-09 | 0.293 | 0.237 |  |  |     | <i>GADD45A</i> | TSS1500 |
| cg07687548 | 2  | 172,965,280 | 0.001325 | 0.293 | 0.389 |  |  |     | <i>DLX2</i>    | Body    |
| cg11953272 | 1  | 53,067,965  | 1.29E-05 | 0.293 | 0.157 |  |  |     | <i>GPX7</i>    | TSS200  |
| cg24250374 | 1  | 184,591,081 | 7.76E-34 | 0.293 | 0.286 |  |  |     | <i>C1orf21</i> | 3'UTR   |
| cg01471428 | 12 | 115,133,663 | 1.7E-18  | 0.293 | 0.303 |  |  |     |                |         |
| cg22376864 | 19 | 42,497,705  | 7.14E-12 | 0.293 | 0.261 |  |  |     | <i>ATP1A3</i>  | Body    |
| cg17276590 | 10 | 119,304,487 | 0.012131 | 0.293 | 0.305 |  |  |     | <i>EMX2OS</i>  | Body    |
| cg01392518 | 6  | 166,583,226 | 3.27E-05 | 0.293 | 0.282 |  |  |     | <i>T</i>       | TSS1500 |
| cg09465142 | 20 | 50,109,375  | 4.6E-17  | 0.293 | 0.284 |  |  |     | <i>NFATC2</i>  | Body    |
| cg18736101 | 10 | 126,043,549 | 0.000465 | 0.293 | 0.201 |  |  |     |                |         |
| cg08860070 | 5  | 140,892,822 | 3.13E-09 | 0.293 | 0.188 |  |  |     |                |         |
| cg16499656 | 7  | 50,344,471  | 0.018511 | 0.293 | 0.301 |  |  |     | <i>IKZF1</i>   | 1stExon |
| cg14317609 | 9  | 36,986,006  | 0.00985  | 0.293 | 0.314 |  |  |     | <i>PAX5</i>    | Body    |
| cg08815340 | 6  | 5,026,435   | 0.007358 | 0.293 | 0.292 |  |  |     |                |         |
| cg16487653 | 16 | 73,200,705  | 2.91E-08 | 0.293 | 0.260 |  |  |     |                |         |
| cg08848958 | 16 | 1,384,655   | 1.4E-06  | 0.293 | 0.286 |  |  |     | <i>BAIAP3</i>  | TSS200  |
| cg13558971 | 1  | 203,597,085 | 0.00231  | 0.293 | 0.376 |  |  |     | <i>ATP2B4</i>  | 5'UTR   |
| cg15647296 | 11 | 77,751,173  | 0.003972 | 0.293 | 0.201 |  |  |     |                |         |
| cg13553997 | 6  | 42,161,424  | 1.99E-07 | 0.293 | 0.258 |  |  |     | <i>GUCA1B</i>  | Body    |
| cg11142826 | 17 | 44,896,223  | 0.014432 | 0.293 | 0.417 |  |  |     | <i>WNT3</i>    | TSS200  |
| cg09726240 | 11 | 70,672,878  | 1.33E-15 | 0.293 | 0.273 |  |  |     | <i>SHANK2</i>  | Body    |
| cg07313504 | 2  | 208,995,664 | 4.29E-17 | 0.293 | 0.303 |  |  |     | <i>CRYGC</i>   | TSS1500 |

|            |    |             |          |       |       |          |       |  |                  |         |
|------------|----|-------------|----------|-------|-------|----------|-------|--|------------------|---------|
| cg00110832 | 6  | 32,121,130  | 3.37E-08 | 0.293 | 0.319 |          |       |  | <i>PPT2</i>      | TSS200  |
| cg03135351 | 2  | 29,338,258  | 0.021235 | 0.293 | 0.241 |          |       |  | <i>CLIP4</i>     | TSS200  |
| cg08154107 | 3  | 183,994,073 | 0.008308 | 0.293 | 0.316 |          |       |  | <i>ECE2</i>      | Body    |
| cg13932029 | 9  | 23,824,172  | 9.36E-13 | 0.293 | 0.322 |          |       |  | <i>ELAVL2</i>    | 5'UTR   |
| cg23035602 | 19 | 53,935,117  | 1.1E-05  | 0.293 | 0.293 |          |       |  | <i>ZNF761</i>    | TSS200  |
| cg19725903 | 12 | 14,721,020  | 3.52E-11 | 0.293 | 0.282 |          |       |  | <i>PLBD1</i>     | TSS1500 |
| cg10807894 | 12 | 125,169,804 | 2.76E-08 | 0.293 | 0.307 |          |       |  |                  |         |
| cg27254482 | 21 | 34,398,085  | 8.21E-06 | 0.293 | 0.256 |          |       |  | <i>OLIG2</i>     | TSS200  |
| cg12828075 | 11 | 15,136,150  | 0.005824 | 0.293 | 0.198 |          |       |  | <i>INSC</i>      | Body    |
| cg27558095 | 1  | 66,999,588  | 0.006837 | 0.293 | 0.272 |          |       |  | <i>SGIP1</i>     | TSS1500 |
| cg24164564 | 8  | 76,317,040  | 4.19E-06 | 0.293 | 0.330 |          |       |  |                  |         |
| cg18752854 | 2  | 218,809,254 | 3.38E-30 | 0.293 | 0.277 | 5.34E-16 | 0.168 |  | <i>TNS1</i>      | TSS1500 |
| cg19904425 | 14 | 94,984,530  | 4.34E-13 | 0.293 | 0.282 |          |       |  | <i>SERPINA12</i> | TSS1500 |
| cg01965939 | 5  | 148,442,694 | 3.16E-07 | 0.293 | 0.241 | 7.07E-31 | 0.236 |  | <i>SH3TC2</i>    | 1stExon |
| cg16683160 | 1  | 87,617,710  | 0.000944 | 0.293 | 0.327 |          |       |  | <i>LOC339524</i> | Body    |
| cg05726239 | 6  | 107,816,677 | 0.02941  | 0.293 | 0.180 |          |       |  | <i>SOBP</i>      | Body    |
| cg18135132 | 11 | 10,814,092  | 0.002919 | 0.293 | 0.255 |          |       |  |                  |         |
| cg24405999 | 3  | 133,393,119 | 0.000703 | 0.293 | 0.363 |          |       |  |                  |         |
| cg05966241 | 16 | 67,515,938  | 4.25E-13 | 0.293 | 0.292 |          |       |  | <i>ATP6V0D1</i>  | TSS1500 |
| cg07963705 | 10 | 33,212,865  | 2.01E-11 | 0.293 | 0.278 |          |       |  | <i>ITGB1</i>     | Body    |
| cg08059112 | 19 | 2,294,887   | 7.25E-18 | 0.293 | 0.268 |          |       |  | <i>LINGO3</i>    | 5'UTR   |
| cg21815063 | 5  | 131,800,430 | 3.92E-08 | 0.293 | 0.221 |          |       |  |                  |         |
| cg23245720 | X  | 133,680,549 | 0.035213 | 0.293 | 0.331 |          |       |  | <i>MGC16121</i>  | Body    |
| cg06371502 | 1  | 197,879,766 | 0.030224 | 0.293 | 0.404 |          |       |  |                  |         |
| cg21672292 | 8  | 145,025,128 | 1.39E-09 | 0.293 | 0.307 |          |       |  | <i>PLEC1</i>     | Body    |
| cg05667348 | 10 | 118,892,581 | 0.009977 | 0.293 | 0.371 |          |       |  | <i>VAX1</i>      | Body    |
| cg08206665 | 11 | 64,479,111  | 0.004132 | 0.293 | 0.358 |          |       |  | <i>NRXN2</i>     | Body    |
| cg10926487 | 17 | 76,917,906  | 1.38E-17 | 0.293 | 0.278 |          |       |  | <i>TIMP2</i>     | Body    |
| cg14092045 | 9  | 116,450,241 | 0.000123 | 0.293 | 0.318 |          |       |  |                  |         |
| cg25051341 | 6  | 100,061,307 | 0.000932 | 0.292 | 0.270 |          |       |  | <i>PRDM13</i>    | Body    |
| cg14816482 | 10 | 12,390,916  | 0.01034  | 0.292 | 0.137 |          |       |  | <i>CAMK1D</i>    | TSS1500 |
| cg14391855 | 11 | 66,104,174  | 9.5E-13  | 0.292 | 0.326 | 2.53E-27 | 0.112 |  | <i>RIN1</i>      | TSS200  |
| cg06314333 | 7  | 129,425,532 | 4.27E-07 | 0.292 | 0.295 |          |       |  |                  |         |
| cg13615338 | 4  | 55,094,005  | 0.020857 | 0.292 | 0.361 |          |       |  | <i>PDGFRA</i>    | TSS1500 |

|            |    |             |          |       |       |          |       |  |          |         |
|------------|----|-------------|----------|-------|-------|----------|-------|--|----------|---------|
| cg10693390 | 11 | 12,411,772  | 1.16E-12 | 0.292 | 0.297 |          |       |  | PARVA    | Body    |
| cg25386234 | 1  | 119,542,159 | 0.000228 | 0.292 | 0.310 |          |       |  |          |         |
| cg12034345 | 6  | 29,975,427  | 1.58E-14 | 0.292 | 0.258 |          |       |  | HLA-J    | Body    |
| cg08175591 | 14 | 101,176,152 | 0.009659 | 0.292 | 0.215 |          |       |  |          |         |
| cg17071446 | 4  | 85,402,497  | 6.41E-06 | 0.292 | 0.252 |          |       |  |          |         |
| cg02446647 | 6  | 133,562,101 | 4.12E-08 | 0.292 | 0.303 |          |       |  | EYA4     | TSS1500 |
| cg24660670 | 1  | 116,371,083 | 3.08E-08 | 0.292 | 0.247 |          |       |  |          |         |
| cg26751792 | 19 | 15,580,383  | 0.000439 | 0.292 | 0.287 |          |       |  | PGLYRP2  | Body    |
| cg05092308 | 2  | 63,285,365  | 4.84E-05 | 0.292 | 0.294 |          |       |  |          |         |
| cg19744211 | 14 | 95,079,224  | 6.8E-14  | 0.292 | 0.296 |          |       |  | SERPINA3 | 5'UTR   |
| cg06496344 | 19 | 23,253,834  | 0.000861 | 0.292 | 0.341 |          |       |  |          |         |
| cg16297011 | 4  | 13,539,023  | 0.000273 | 0.292 | 0.331 |          |       |  |          |         |
| cg06118384 | 2  | 149,645,798 | 5.01E-06 | 0.292 | 0.291 |          |       |  | KIF5C    | Body    |
| cg20560075 | 5  | 146,257,484 | 0.017182 | 0.292 | 0.330 |          |       |  | PPP2R2B  | Body    |
| cg10537807 | 17 | 56,415,478  | 1.4E-07  | 0.292 | 0.322 |          |       |  |          |         |
| cg07813249 | 4  | 46,392,253  | 0.001768 | 0.292 | 0.275 |          |       |  | GABRA2   | TSS200  |
| cg04370314 | 13 | 100,643,312 | 0.040964 | 0.292 | 0.348 |          |       |  |          |         |
| cg08063911 | 5  | 133,451,474 | 1.35E-14 | 0.292 | 0.255 |          |       |  | TCF7     | 5'UTR   |
| cg09434193 | 16 | 227,233     | 0.000432 | 0.292 | 0.349 |          |       |  | HBA1     | Body    |
| cg02577436 | 4  | 8,271,369   | 1.25E-07 | 0.292 | 0.233 |          |       |  | HTRA3    | TSS200  |
| cg09092093 | 5  | 58,335,954  | 1.7E-07  | 0.292 | 0.243 |          |       |  | PDE4D    | Body    |
| cg15128226 | 4  | 123,747,672 | 2.13E-09 | 0.292 | 0.268 |          |       |  | FGF2     | TSS200  |
| cg16686951 | 20 | 44,747,351  | 6.13E-05 | 0.292 | 0.363 |          |       |  | CD40     | Body    |
| cg06659128 | X  | 154,842,535 | 0.000994 | 0.292 | 0.262 | 2.58E-27 | 0.242 |  | TMLHE    | 5'UTR   |
| cg00868131 | 1  | 54,952,901  | 0.000923 | 0.292 | 0.214 |          |       |  |          |         |
| cg05389236 | 6  | 36,635,087  | 1.21E-12 | 0.292 | 0.314 |          |       |  |          |         |
| cg16485975 | 20 | 25,065,418  | 0.038852 | 0.292 | 0.198 |          |       |  |          |         |
| cg03654299 | 12 | 54,389,264  | 0.031701 | 0.292 | 0.184 |          |       |  |          |         |
| cg04077363 | X  | 102,531,881 | 0.00022  | 0.292 | 0.243 |          |       |  | TCEAL5   | TSS200  |
| cg27531366 | 1  | 27,627,058  | 5.27E-18 | 0.292 | 0.279 |          |       |  | WDTC1    | Body    |
| cg17589633 | 1  | 203,595,283 | 3.19E-07 | 0.292 | 0.226 |          |       |  | ATP2B4   | TSS1500 |
| cg06905130 | 2  | 287,148     | 3.23E-07 | 0.292 | 0.274 |          |       |  | FAM150B  | Body    |
| cg11199046 | 12 | 115,136,308 | 1.96E-24 | 0.292 | 0.281 |          |       |  |          |         |
| cg08142344 | 1  | 110,210,699 | 1.46E-06 | 0.292 | 0.252 |          |       |  | GSTM2    | 5'UTR   |

|            |    |             |          |       |       |         |       |  |                |         |
|------------|----|-------------|----------|-------|-------|---------|-------|--|----------------|---------|
| cg05617413 | 12 | 133,065,912 | 0.029164 | 0.292 | 0.282 |         |       |  | <i>FBRSL1</i>  | TSS1500 |
| cg07494518 | 21 | 44,847,608  | 1.07E-05 | 0.292 | 0.235 | 2.5E-21 | 0.186 |  | <i>SIK1</i>    | TSS1500 |
| cg18731398 | 3  | 123,414,733 | 2.7E-15  | 0.292 | 0.293 |         |       |  | <i>MYLK</i>    | Body    |
| cg06893296 | 6  | 30,095,136  | 9.05E-19 | 0.292 | 0.285 |         |       |  |                |         |
| cg22388634 | 20 | 25,058,429  | 0.023417 | 0.292 | 0.352 |         |       |  | <i>VSX1</i>    | Body    |
| cg06356912 | 3  | 38,035,642  | 0.02258  | 0.292 | 0.113 |         |       |  | <i>VILL</i>    | Body    |
| cg02998240 | 1  | 16,508,668  | 1.88E-21 | 0.292 | 0.273 |         |       |  |                |         |
| cg23986590 | 2  | 109,934,728 | 6.61E-18 | 0.292 | 0.283 |         |       |  | <i>SH3RF3</i>  | Body    |
| cg24287239 | 13 | 43,148,278  | 5.42E-06 | 0.292 | 0.297 |         |       |  | <i>TNFSF11</i> | TSS200  |
| cg09422450 | 16 | 79,623,618  | 7.58E-14 | 0.292 | 0.256 |         |       |  |                |         |
| cg23217153 | 2  | 242,808,611 | 7.85E-07 | 0.292 | 0.292 |         |       |  |                |         |
| cg05614013 | 19 | 11,253,754  | 0.003414 | 0.292 | 0.182 |         |       |  |                |         |
| cg11550865 | 15 | 59,501,408  | 5.92E-15 | 0.292 | 0.276 |         |       |  | <i>MYO1E</i>   | Body    |
| cg21158411 | 9  | 130,689,627 | 0.003254 | 0.292 | 0.244 |         |       |  | <i>PIP5KL1</i> | Body    |
| cg03610280 | 10 | 97,592,418  | 5.2E-06  | 0.292 | 0.240 |         |       |  | <i>ENTPD1</i>  | Body    |
| cg06161600 | 16 | 1,393,797   | 0.001564 | 0.292 | 0.205 |         |       |  | <i>BAIAP3</i>  | Body    |
| cg10773698 | 1  | 61,519,473  | 7.41E-06 | 0.292 | 0.269 |         |       |  |                |         |
| cg10551329 | 6  | 32,120,933  | 0.001305 | 0.292 | 0.320 |         |       |  | <i>PPT2</i>    | TSS1500 |
| cg20025238 | 7  | 128,829,789 | 2.16E-14 | 0.292 | 0.253 |         |       |  | <i>SMO</i>     | Body    |
| cg22339338 | 1  | 159,891,638 | 3.64E-27 | 0.292 | 0.286 |         |       |  | <i>TAGLN2</i>  | 5'UTR   |
| cg06426114 | 17 | 6,355,097   | 1.69E-09 | 0.292 | 0.286 |         |       |  | <i>PITPNM3</i> | 3'UTR   |
| cg01056004 | 10 | 98,948,259  | 5.57E-13 | 0.292 | 0.286 |         |       |  |                |         |
| cg15428435 | 14 | 102,247,681 | 0.000162 | 0.292 | 0.190 |         |       |  | <i>PPP2R5C</i> | Body    |
| cg19290504 | 17 | 3,867,060   | 2.32E-05 | 0.292 | 0.262 |         |       |  | <i>ATP2A3</i>  | Body    |
| cg09396895 | 7  | 25,021,067  | 0.001355 | 0.292 | 0.175 |         |       |  | <i>OSBPL3</i>  | TSS1500 |
| cg11682083 | 5  | 172,782,844 | 1.06E-10 | 0.292 | 0.320 |         |       |  |                |         |
| cg20592766 | 2  | 109,934,860 | 1.67E-16 | 0.292 | 0.277 |         |       |  | <i>SH3RF3</i>  | Body    |
| cg25547580 | 18 | 55,103,734  | 0.003682 | 0.292 | 0.323 |         |       |  | <i>ONECUT2</i> | 1stExon |
| cg11896151 | 7  | 223,592     | 3.13E-17 | 0.292 | 0.290 |         |       |  | <i>FAM20C</i>  | Body    |
| cg23064609 | 2  | 175,208,594 | 0.02645  | 0.292 | 0.331 |         |       |  |                |         |
| cg06776173 | 1  | 46,932,780  | 8.56E-06 | 0.292 | 0.281 |         |       |  |                |         |
| cg13545297 | 12 | 54,404,315  | 5.98E-11 | 0.292 | 0.256 |         |       |  | <i>HOXC8</i>   | Body    |
| cg03718183 | 1  | 26,231,082  | 1.14E-18 | 0.292 | 0.260 |         |       |  | <i>STMN1</i>   | Body    |
| cg02489958 | 4  | 85,417,416  | 0.000539 | 0.292 | 0.308 |         |       |  | <i>NKX6-1</i>  | Body    |

|            |    |             |          |       |       |          |       |     |                 |         |
|------------|----|-------------|----------|-------|-------|----------|-------|-----|-----------------|---------|
| cg07406897 | 17 | 27,347,178  | 0.014305 | 0.292 | 0.094 |          |       |     |                 |         |
| cg14343652 | 7  | 130,789,013 | 8.83E-11 | 0.292 | 0.353 |          |       |     | <i>FLI43663</i> | Body    |
| cg17164954 | 6  | 157,345,266 | 4.35E-19 | 0.292 | 0.300 |          |       |     | <i>ARID1B</i>   | Body    |
| cg26929700 | 16 | 49,732,567  | 2.57E-11 | 0.292 | 0.278 |          |       |     | <i>ZNF423</i>   | Body    |
| cg05386570 | 7  | 99,177,695  | 1.02E-17 | 0.292 | 0.255 |          |       |     |                 |         |
| cg19630629 | 7  | 136,556,193 | 6.99E-05 | 0.292 | 0.212 |          |       |     | <i>CHRM2</i>    | 5'UTR   |
| cg11481582 | 10 | 74,080,805  | 1.42E-12 | 0.292 | 0.278 |          |       |     |                 |         |
| cg16657340 | 7  | 131,242,787 | 0.003448 | 0.292 | 0.195 |          |       |     | <i>PODXL</i>    | TSS1500 |
| cg13385210 | 17 | 38,599,271  | 3.81E-11 | 0.292 | 0.263 |          |       |     | <i>IGFBP4</i>   | TSS1500 |
| cg06261066 | 20 | 2,360,396   | 2.86E-06 | 0.292 | 0.247 |          |       |     | <i>TGM6</i>     | TSS1500 |
| cg04849985 | 1  | 68,215,783  | 2.22E-05 | 0.291 | 0.276 |          |       |     | <i>GNG12</i>    | 5'UTR   |
| cg07629454 | 3  | 121,903,520 | 0.000286 | 0.291 | 0.275 |          |       |     | <i>CASR</i>     | 5'UTR   |
| cg19925204 | 10 | 119,307,692 | 0.00845  | 0.291 | 0.255 |          |       |     | <i>EMX2</i>     | 3'UTR   |
| cg21117965 | 2  | 220,325,369 | 2.48E-15 | 0.291 | 0.282 |          |       |     | <i>SPEG</i>     | Body    |
| cg19080053 | 6  | 5,132,887   | 8.78E-10 | 0.291 | 0.280 |          |       |     | <i>LYRM4</i>    | 3'UTR   |
| cg15920654 | 4  | 4,869,091   | 0.012016 | 0.291 | 0.346 |          |       |     |                 |         |
| cg09234567 | 15 | 72,489,828  | 0.048876 | 0.291 | 0.162 |          |       |     | <i>GRAMD2</i>   | Body    |
| cg22996170 | 19 | 12,895,529  | 6.91E-20 | 0.291 | 0.287 |          |       |     |                 |         |
| cg00979803 | 17 | 38,646,740  | 4.19E-15 | 0.291 | 0.279 |          |       | Yes | <i>TNS4</i>     | Body    |
| cg02181624 | 6  | 168,716,070 | 2.66E-13 | 0.291 | 0.282 |          |       |     | <i>DACT2</i>    | Body    |
| cg06611426 | 12 | 52,404,161  | 9.51E-06 | 0.291 | 0.267 |          |       |     | <i>GRASP</i>    | Body    |
| cg00935993 | 2  | 21,022,933  | 0.000484 | 0.291 | 0.252 |          |       |     | <i>C2orf43</i>  | TSS200  |
| cg26132320 | 20 | 44,640,353  | 0.000928 | 0.291 | 0.400 |          |       |     | <i>MMP9</i>     | Body    |
| cg02595219 | 11 | 74,178,761  | 2.72E-08 | 0.291 | 0.255 | 6.29E-18 | 0.221 |     | <i>KCNE3</i>    | TSS200  |
| cg16783744 | 8  | 105,478,855 | 3.51E-07 | 0.291 | 0.280 |          |       |     | <i>DPYS</i>     | Body    |
| cg02387326 | 12 | 54,345,679  | 3E-05    | 0.291 | 0.276 |          |       |     |                 |         |
| cg09170903 | 15 | 62,457,209  | 0.00599  | 0.291 | 0.348 |          |       |     | <i>C2CD4B</i>   | 5'UTR   |
| cg20844851 | 6  | 117,591,827 | 0.04171  | 0.291 | 0.122 |          |       |     | <i>VGLL2</i>    | Body    |
| cg20427865 | 16 | 57,406,353  | 3.19E-12 | 0.291 | 0.298 | 1.83E-21 | 0.231 |     | <i>CX3CL1</i>   | TSS200  |
| cg04010446 | 6  | 162,311,879 | 0.000139 | 0.291 | 0.244 |          |       |     | <i>PARK2</i>    | Body    |
| cg14185547 | 8  | 145,497,339 | 7.31E-14 | 0.291 | 0.313 |          |       |     | <i>BOP1</i>     | Body    |
| cg24804060 | 17 | 48,425,014  | 4.16E-18 | 0.291 | 0.295 |          |       |     | <i>XYLT2</i>    | Body    |
| cg26987928 | 15 | 62,767,926  | 3.71E-14 | 0.291 | 0.292 |          |       |     |                 |         |
| cg10556384 | 10 | 94,828,103  | 0.000438 | 0.291 | 0.168 |          |       |     | <i>CYP26C1</i>  | Body    |

|            |    |             |          |       |       |            |       |  |                 |         |
|------------|----|-------------|----------|-------|-------|------------|-------|--|-----------------|---------|
| cg10201685 | 7  | 44,315,903  | 2.64E-12 | 0.291 | 0.276 |            |       |  | <i>CAMK2B</i>   | Body    |
| cg11332928 | 1  | 45,273,680  | 0.010515 | 0.291 | 0.242 |            |       |  | <i>BTBD19</i>   | TSS1500 |
| cg20615879 | 10 | 102,892,391 | 0.00697  | 0.291 | 0.291 |            |       |  | <i>TLX1NB</i>   | TSS1500 |
| cg24738346 | 1  | 27,479,312  | 1.04E-07 | 0.291 | 0.276 |            |       |  | <i>SLC9A1</i>   | Body    |
| cg21601919 | 5  | 170,877,932 | 2.62E-06 | 0.291 | 0.260 |            |       |  | <i>FGF18</i>    | Body    |
| cg02285791 | 6  | 27,550,747  | 0.000771 | 0.291 | 0.342 |            |       |  |                 |         |
| cg03650550 | 4  | 83,675,797  | 2.6E-14  | 0.291 | 0.280 |            |       |  | <i>MIR575</i>   | TSS1500 |
| cg11038340 | 14 | 103,389,966 | 4.53E-05 | 0.291 | 0.309 |            |       |  | <i>AMN</i>      | Body    |
| cg26186239 | 20 | 62,119,492  | 1.67E-09 | 0.291 | 0.239 |            |       |  | <i>EEF1A2</i>   | 3'UTR   |
| cg10655236 | 17 | 753,974     | 2.15E-10 | 0.291 | 0.287 |            |       |  | <i>NXN</i>      | Body    |
| cg04258335 | 6  | 123,121,585 | 3.81E-10 | 0.291 | 0.271 |            |       |  | <i>SMPDL3A</i>  | Body    |
| cg11294513 | 19 | 58,220,295  | 4.47E-06 | 0.291 | 0.234 |            |       |  | <i>ZNF154</i>   | Body    |
| cg11841649 | 5  | 131,989,505 | 1.22E-08 | 0.291 | 0.311 |            |       |  |                 |         |
| cg13051071 | 1  | 145,473,392 | 0.032709 | 0.291 | 0.173 |            |       |  | <i>ANKRD34A</i> | Body    |
| cg13803976 | 2  | 87,016,129  | 1.92E-06 | 0.291 | 0.296 |            |       |  | <i>CD8A</i>     | Body    |
| cg09236434 | 2  | 99,553,642  | 8.49E-07 | 0.291 | 0.285 |            |       |  | <i>C2orf55</i>  | TSS1500 |
| cg02984614 | 17 | 31,618,409  | 0.027926 | 0.291 | 0.283 |            |       |  | <i>ACCN1</i>    | Body    |
| cg01264639 | 5  | 73,839,484  | 6.41E-10 | 0.291 | 0.251 |            |       |  |                 |         |
| cg03951603 | 15 | 89,903,565  | 0.003722 | 0.291 | 0.289 |            |       |  |                 |         |
| cg16529599 | 20 | 42,137,055  | 2.4E-06  | 0.291 | 0.293 |            |       |  |                 |         |
| cg04800503 | 17 | 46,648,533  | 4.94E-12 | 0.291 | 0.244 |            |       |  | <i>HOXB3</i>    | 5'UTR   |
| cg01762827 | 16 | 69,141,442  | 0.03634  | 0.291 | 0.294 |            |       |  | <i>HAS3</i>     | 5'UTR   |
| cg15536490 | 20 | 55,203,849  | 0.002128 | 0.291 | 0.219 | 0.00462803 | 0.069 |  | <i>TFAP2C</i>   | TSS1500 |
| cg19320476 | 11 | 82,443,592  | 3.81E-07 | 0.291 | 0.281 |            |       |  | <i>FAM181B</i>  | 1stExon |
| cg10896862 | 1  | 161,275,561 | 0.002339 | 0.291 | 0.326 |            |       |  | <i>MPZ</i>      | 3'UTR   |
| cg18608369 | 17 | 33,700,759  | 0.010716 | 0.291 | 0.337 |            |       |  | <i>SLFN11</i>   | TSS200  |
| cg08134504 | 2  | 16,245,936  | 1.36E-14 | 0.291 | 0.253 |            |       |  |                 |         |
| cg17947992 | 6  | 2,510,180   | 2.43E-13 | 0.291 | 0.270 |            |       |  |                 |         |
| cg04858553 | 17 | 80,549,621  | 1.55E-14 | 0.291 | 0.300 |            |       |  | <i>FOXK2</i>    | Body    |
| cg19519964 | 2  | 223,290,012 | 8.71E-14 | 0.291 | 0.235 |            |       |  | <i>SGPP2</i>    | Body    |
| cg18912484 | 14 | 97,058,964  | 0.002264 | 0.291 | 0.266 |            |       |  |                 |         |
| cg01765111 | 1  | 37,784,244  | 0.03852  | 0.291 | 0.293 |            |       |  |                 |         |
| cg06097580 | 16 | 56,456,934  | 2.97E-32 | 0.291 | 0.275 |            |       |  | <i>AMFR</i>     | Body    |
| cg18566515 | 10 | 123,356,236 | 2.2E-07  | 0.291 | 0.280 |            |       |  | <i>FGFR2</i>    | 5'UTR   |

|            |    |             |          |       |       |         |       |  |                  |         |
|------------|----|-------------|----------|-------|-------|---------|-------|--|------------------|---------|
| cg14345131 | 2  | 233,741,790 | 3.5E-17  | 0.291 | 0.241 |         |       |  |                  |         |
| cg09990446 | 6  | 29,716,108  | 1.63E-07 | 0.291 | 0.237 |         |       |  | <i>LOC285830</i> | Body    |
| cg07915921 | 12 | 54,321,502  | 0.027807 | 0.291 | 0.275 |         |       |  |                  |         |
| cg22245096 | 2  | 238,681,052 | 2.36E-08 | 0.291 | 0.295 |         |       |  | <i>LRRFIP1</i>   | Body    |
| cg15258447 | 10 | 99,798,430  | 1.13E-06 | 0.291 | 0.283 |         |       |  |                  |         |
| cg04656070 | 8  | 116,661,063 | 4.68E-22 | 0.291 | 0.301 |         |       |  | <i>TRPS1</i>     | 5'UTR   |
| cg20326704 | 10 | 70,321,770  | 1.72E-06 | 0.291 | 0.275 |         |       |  | <i>TET1</i>      | 5'UTR   |
| cg02050376 | 13 | 109,984,684 | 1.65E-07 | 0.291 | 0.211 |         |       |  |                  |         |
| cg06159340 | 16 | 30,907,560  | 4.82E-06 | 0.291 | 0.277 |         |       |  | <i>CTF1</i>      | TSS1500 |
| cg01258949 | 11 | 47,092,992  | 5.06E-15 | 0.291 | 0.286 |         |       |  | <i>C11orf49</i>  | Body    |
| cg14100184 | 16 | 851,298     | 2.64E-08 | 0.291 | 0.298 | 7.9E-16 | 0.157 |  | <i>GNG13</i>     | TSS1500 |
| cg08593157 | 17 | 17,684,240  | 1.13E-16 | 0.291 | 0.286 |         |       |  | <i>SMCR5</i>     | TSS1500 |
| cg00618626 | 17 | 39,807,901  | 3.85E-13 | 0.291 | 0.277 |         |       |  |                  |         |
| cg17207552 | X  | 39,767,775  | 3.4E-23  | 0.291 | 0.267 |         |       |  |                  |         |
| cg18438793 | 1  | 40,149,837  | 0.018679 | 0.291 | 0.337 |         |       |  | <i>HPCAL4</i>    | Body    |
| cg00862116 | 7  | 87,230,344  | 0.001194 | 0.291 | 0.265 |         |       |  | <i>ABCB1</i>     | 5'UTR   |
| cg17214381 | 4  | 188,916,668 | 0.015322 | 0.291 | 0.290 |         |       |  | <i>ZFP42</i>     | TSS1500 |
| cg06452354 | 17 | 43,449,123  | 0.005506 | 0.291 | 0.278 |         |       |  |                  |         |
| cg17768491 | 19 | 41,018,876  | 0.032898 | 0.291 | 0.289 |         |       |  | <i>SPTBN4</i>    | Body    |
| cg01530482 | 11 | 1,976,432   | 1.43E-19 | 0.291 | 0.299 |         |       |  | <i>MRPL23</i>    | Body    |
| cg09155362 | 15 | 33,487,289  | 1.85E-05 | 0.291 | 0.291 |         |       |  |                  |         |
| cg25577023 | 14 | 103,394,899 | 0.042886 | 0.291 | 0.388 |         |       |  | <i>AMN</i>       | Body    |
| cg12946808 | 11 | 115,493,909 | 3.24E-07 | 0.291 | 0.270 |         |       |  |                  |         |
| cg18140268 | 1  | 147,781,827 | 1.75E-08 | 0.291 | 0.285 |         |       |  |                  |         |
| cg13646785 | 9  | 135,461,935 | 0.000937 | 0.291 | 0.293 |         |       |  | <i>BARHL1</i>    | Body    |
| cg14604470 | 9  | 130,713,376 | 2.02E-17 | 0.291 | 0.301 |         |       |  | <i>FAM102A</i>   | TSS1500 |
| cg04089901 | 7  | 7,557,590   | 7.64E-11 | 0.291 | 0.272 |         |       |  | <i>COL28A1</i>   | Body    |
| cg14498745 | 7  | 142,638,303 | 6.3E-10  | 0.291 | 0.298 |         |       |  | <i>KEL</i>       | 3'UTR   |
| cg20389472 | 2  | 171,568,526 | 0.028071 | 0.291 | 0.198 |         |       |  |                  |         |
| cg03143486 | 7  | 811,491     | 2.75E-10 | 0.291 | 0.300 |         |       |  | <i>HEATR2</i>    | Body    |
| cg14836602 | 5  | 3,592,718   | 0.000426 | 0.291 | 0.390 |         |       |  |                  |         |
| cg12573871 | 18 | 72,509,555  | 1.25E-06 | 0.291 | 0.249 |         |       |  | <i>ZNF407</i>    | Body    |
| cg08019736 | 11 | 115,529,822 | 8.71E-09 | 0.291 | 0.305 |         |       |  |                  |         |
| cg11059357 | 8  | 41,649,676  | 3.3E-07  | 0.291 | 0.269 |         |       |  | <i>ANK1</i>      | Body    |



|            |    |             |          |       |       |          |       |     |                     |         |
|------------|----|-------------|----------|-------|-------|----------|-------|-----|---------------------|---------|
| cg03673965 | 6  | 108,497,734 | 3.43E-05 | 0.290 | 0.303 |          |       |     | <i>NR2E1</i>        | Body    |
| cg20645966 | 12 | 117,131,719 | 1.28E-07 | 0.290 | 0.211 |          |       |     |                     |         |
| cg25596297 | 2  | 223,162,875 | 0.00056  | 0.290 | 0.278 |          |       |     | <i>PAX3</i>         | Body    |
| cg26983177 | 19 | 35,395,973  | 0.00056  | 0.290 | 0.257 |          |       |     |                     |         |
| cg06536868 | 2  | 27,530,884  | 2.86E-07 | 0.290 | 0.259 |          |       |     | <i>UCN</i>          | 5'UTR   |
| cg18254850 | 6  | 116,691,851 | 0.027265 | 0.290 | 0.188 |          |       |     | <i>DSE</i>          | TSS1500 |
| cg26249873 | 10 | 25,465,430  | 1.35E-08 | 0.290 | 0.335 |          |       |     | <i>LOC100128811</i> | TSS1500 |
| cg07402669 | 20 | 57,090,015  | 0.000204 | 0.290 | 0.295 |          |       |     | <i>APCDD1L</i>      | TSS200  |
| cg12563839 | 14 | 91,580,507  | 0.019067 | 0.290 | 0.123 |          |       |     | <i>C14orf159</i>    | 1stExon |
| cg00568550 | 1  | 61,784,017  | 0.002285 | 0.290 | 0.256 |          |       | Yes | <i>NFIA</i>         | Body    |
| cg21852513 | 1  | 116,371,475 | 0.000153 | 0.290 | 0.255 |          |       |     |                     |         |
| cg26311932 | 6  | 31,549,563  | 2.69E-18 | 0.290 | 0.279 |          |       |     | <i>LTB</i>          | Body    |
| cg08849150 | 6  | 117,087,010 | 4.12E-07 | 0.290 | 0.215 |          |       |     | <i>FAM162B</i>      | TSS200  |
| cg22488750 | 1  | 22,678,029  | 2.54E-05 | 0.290 | 0.264 |          |       |     |                     |         |
| cg21051972 | 11 | 18,067,927  | 0.003832 | 0.290 | 0.263 |          |       |     |                     |         |
| cg22134162 | 3  | 63,841,271  | 6.72E-17 | 0.290 | 0.276 |          |       |     | <i>THOC7</i>        | Body    |
| cg22991148 | 21 | 46,131,099  | 0.00704  | 0.290 | 0.254 | 7.47E-21 | 0.223 |     | <i>C21orf29</i>     | Body    |
| cg09032314 | 8  | 69,426,081  | 8.28E-11 | 0.290 | 0.295 |          |       |     | <i>C8orf34</i>      | Body    |
| cg14796305 | 1  | 46,632,581  | 1.45E-06 | 0.290 | 0.320 |          |       |     |                     |         |
| cg18451814 | 14 | 57,278,188  | 1.1E-13  | 0.290 | 0.321 |          |       |     | <i>OTX2</i>         | TSS1500 |
| cg16324314 | 14 | 77,480,847  | 2.4E-06  | 0.290 | 0.236 |          |       |     |                     |         |
| cg15959252 | 12 | 48,578,724  | 2.8E-10  | 0.290 | 0.311 |          |       |     | <i>C12orf68</i>     | 3'UTR   |
| cg18495563 | 11 | 33,061,907  | 0.000673 | 0.290 | 0.271 | 9.89E-20 | 0.167 |     | <i>TCP11L1</i>      | 5'UTR   |
| cg25096264 | 1  | 112,860,317 | 2.38E-12 | 0.290 | 0.288 |          |       |     |                     |         |
| cg01856529 | 12 | 54,653,091  | 3.91E-17 | 0.290 | 0.292 |          |       |     | <i>CBX5</i>         | 1stExon |
| cg14575356 | 6  | 130,013,903 | 3.59E-08 | 0.290 | 0.296 |          |       |     | <i>ARHGAP18</i>     | Body    |
| cg16714091 | 9  | 18,473,902  | 7.69E-07 | 0.290 | 0.223 | 3.67E-14 | 0.170 |     | <i>ADAMTSL1</i>     | TSS1500 |
| cg10580293 | 7  | 29,605,897  | 1.16E-10 | 0.290 | 0.287 |          |       |     | <i>PRR15</i>        | 5'UTR   |
| cg14604777 | 12 | 101,988,756 | 1.9E-06  | 0.290 | 0.223 |          |       |     | <i>MYBPC1</i>       | 5'UTR   |
| cg21148362 | 3  | 62,353,708  | 0.003526 | 0.290 | 0.270 |          |       |     |                     |         |
| cg26515460 | 20 | 983,354     | 0.012437 | 0.290 | 0.316 |          |       |     | <i>RSPO4</i>        | TSS1500 |
| cg14189141 | 9  | 1,042,605   | 0.001285 | 0.290 | 0.277 |          |       |     |                     |         |
| cg07516252 | 14 | 24,641,201  | 4.78E-11 | 0.290 | 0.288 |          |       |     | <i>REC8</i>         | TSS200  |
| cg18168101 | 8  | 104,153,627 | 7.27E-09 | 0.290 | 0.294 |          |       |     | <i>C8orf56</i>      | TSS200  |

|            |    |             |          |       |       |          |       |     |                  |         |
|------------|----|-------------|----------|-------|-------|----------|-------|-----|------------------|---------|
| cg10746936 | 14 | 95,240,143  | 0.003698 | 0.290 | 0.306 |          |       |     |                  |         |
| cg08334034 | 15 | 93,615,039  | 5.76E-15 | 0.290 | 0.271 |          |       |     | <i>RGMA</i>      | Body    |
| cg05210480 | 7  | 24,539,647  | 4.69E-26 | 0.290 | 0.288 |          |       |     |                  |         |
| cg26433955 | 12 | 96,558,950  | 1.64E-10 | 0.290 | 0.302 |          |       |     |                  |         |
| cg07756483 | 19 | 44,281,665  | 0.000119 | 0.290 | 0.207 |          |       |     | <i>KCNN4</i>     | Body    |
| cg12537329 | 13 | 113,677,777 | 4.95E-19 | 0.290 | 0.287 |          |       |     | <i>MCF2L</i>     | Body    |
| cg20485758 | 6  | 26,088,446  | 1.09E-05 | 0.290 | 0.279 |          |       |     | <i>HFE</i>       | Body    |
| cg05627522 | 15 | 75,251,581  | 2.46E-09 | 0.290 | 0.241 |          |       |     |                  |         |
| cg17128417 | 2  | 20,865,088  | 9.9E-06  | 0.290 | 0.266 |          |       | Yes | <i>GDF7</i>      | TSS1500 |
| cg24376776 | 10 | 101,297,245 | 9.9E-05  | 0.290 | 0.264 |          |       |     |                  |         |
| cg14464718 | X  | 100,334,126 | 0.003874 | 0.290 | 0.314 |          |       |     | <i>TMEM35</i>    | Body    |
| cg22698489 | 1  | 159,893,696 | 0.007443 | 0.290 | 0.283 |          |       |     | <i>TAGLN2</i>    | 5'UTR   |
| cg01417625 | 1  | 183,187,433 | 0.000493 | 0.290 | 0.262 |          |       |     | <i>LAMC2</i>     | Body    |
| cg02490736 | 6  | 1,391,758   | 9.24E-06 | 0.290 | 0.253 |          |       |     | <i>FOXF2</i>     | Body    |
| cg13721404 | 18 | 31,739,202  | 0.016779 | 0.290 | 0.311 |          |       |     | <i>NOL4</i>      | Body    |
| cg22544863 | 19 | 15,580,400  | 3.38E-09 | 0.290 | 0.286 |          |       |     | <i>PGLYRP2</i>   | Body    |
| cg22673999 | 6  | 37,752,301  | 0.000112 | 0.290 | 0.214 |          |       |     |                  |         |
| cg17356056 | 5  | 139,526,226 | 2.46E-16 | 0.290 | 0.269 |          |       |     |                  |         |
| cg13784235 | 6  | 108,495,865 | 9.31E-07 | 0.290 | 0.271 |          |       |     | <i>NR2E1</i>     | Body    |
| cg26451547 | 11 | 36,397,596  | 6.12E-08 | 0.290 | 0.234 |          |       |     | <i>PRR5L</i>     | 5'UTR   |
| cg04615460 | 12 | 115,125,098 | 4.5E-13  | 0.290 | 0.271 |          |       |     |                  |         |
| cg05589784 | 5  | 2,915,123   | 1.93E-07 | 0.290 | 0.309 |          |       |     |                  |         |
| cg09632907 | 4  | 54,969,963  | 2.91E-05 | 0.290 | 0.296 |          |       |     |                  |         |
| cg24035245 | 1  | 119,535,928 | 7.35E-10 | 0.290 | 0.247 |          |       |     |                  |         |
| cg08058191 | 17 | 39,781,130  | 2.36E-07 | 0.290 | 0.284 |          |       |     | <i>KRT17</i>     | TSS1500 |
| cg00582971 | 5  | 178,422,128 | 0.018721 | 0.290 | 0.369 |          |       |     | <i>GRM6</i>      | TSS200  |
| cg13661109 | 9  | 129,433,708 | 2.35E-11 | 0.290 | 0.304 |          |       |     | <i>LMX1B</i>     | Body    |
| cg14132388 | 12 | 120,242,490 | 3.7E-06  | 0.290 | 0.277 |          |       |     | <i>CIT</i>       | Body    |
| cg00020474 | 1  | 8,214,963   | 0.000213 | 0.290 | 0.139 |          |       |     |                  |         |
| cg24153044 | 1  | 6,485,201   | 0.004408 | 0.290 | 0.325 |          |       |     | <i>ESPN</i>      | 1stExon |
| cg15639684 | 1  | 85,464,110  | 6.11E-15 | 0.290 | 0.265 |          |       |     | <i>MCOLN2</i>    | TSS1500 |
| cg10670396 | X  | 101,906,537 | 0.026956 | 0.290 | 0.319 |          |       |     | <i>GPRASP1</i>   | 5'UTR   |
| cg01629716 | 15 | 45,996,671  | 3.12E-05 | 0.290 | 0.289 |          |       |     |                  |         |
| cg27090216 | 8  | 22,960,461  | 0.003201 | 0.290 | 0.209 | 5.92E-14 | 0.225 |     | <i>TNFRSF10C</i> | 5'UTR   |

|            |    |             |          |       |       |          |       |     |                    |         |
|------------|----|-------------|----------|-------|-------|----------|-------|-----|--------------------|---------|
| cg15829642 | 5  | 140,744,983 | 0.004652 | 0.290 | 0.341 |          |       |     | <i>PCDHGA4</i>     | Body    |
| cg23546512 | 12 | 125,160,999 | 4.31E-15 | 0.290 | 0.280 |          |       |     |                    |         |
| cg25678088 | 7  | 96,632,460  | 1.58E-10 | 0.290 | 0.247 |          |       |     | <i>DLX6AS</i>      | Body    |
| cg25061914 | 22 | 37,447,468  | 0.004527 | 0.289 | 0.160 |          |       | Yes | <i>KCTD17</i>      | TSS1500 |
| cg01014615 | 2  | 177,027,621 | 4.45E-05 | 0.289 | 0.310 |          |       |     | <i>HOXD3</i>       | TSS1500 |
| cg24306340 | 1  | 64,937,451  | 6.06E-06 | 0.289 | 0.270 |          |       |     | <i>CACHD1</i>      | Body    |
| cg11437784 | 13 | 112,710,823 | 0.015958 | 0.289 | 0.273 |          |       |     |                    |         |
| cg06973595 | 4  | 55,093,096  | 0.00042  | 0.289 | 0.316 |          |       |     |                    |         |
| cg18265608 | 11 | 44,087,367  | 1.04E-09 | 0.289 | 0.255 |          |       |     | <i>ACCS</i>        | TSS1500 |
| cg25280433 | 6  | 105,584,216 | 0.004119 | 0.289 | 0.178 |          |       |     | <i>BVES</i>        | 5'UTR   |
| cg12781915 | 3  | 185,544,099 | 5.38E-06 | 0.289 | 0.283 |          |       |     | <i>IGF2BP2</i>     | TSS1500 |
| cg15616496 | 17 | 73,860,607  | 3.25E-07 | 0.289 | 0.284 |          |       |     |                    |         |
| cg02764093 | 12 | 120,241,760 | 1.44E-18 | 0.289 | 0.278 |          |       |     | <i>CIT</i>         | Body    |
| cg09963123 | 4  | 38,664,654  | 4.27E-05 | 0.289 | 0.216 | 5.17E-08 | 0.109 |     | <i>FLJ13197</i>    | Body    |
| cg05750047 | 1  | 149,908,085 | 3.24E-23 | 0.289 | 0.286 |          |       |     | <i>MTMR11</i>      | Body    |
| cg08764465 | 8  | 15,308,417  | 8.6E-15  | 0.289 | 0.294 |          |       |     |                    |         |
| cg12920180 | 14 | 31,344,444  | 1.85E-05 | 0.289 | 0.305 |          |       |     | <i>COCH</i>        | Body    |
| cg07631309 | 10 | 106,020,930 | 1.28E-08 | 0.289 | 0.274 |          |       |     | <i>GSTO1</i>       | Body    |
| cg13782866 | 1  | 231,761,845 | 1.13E-08 | 0.289 | 0.260 |          |       |     | <i>TSNAX-DISC1</i> | Body    |
| cg15204861 | 11 | 111,783,352 | 1.9E-05  | 0.289 | 0.325 |          |       |     | <i>CRYAB</i>       | TSS1500 |
| cg14470978 | 9  | 132,427,640 | 0.017625 | 0.289 | 0.268 |          |       |     | <i>PRRX2</i>       | TSS1500 |
| cg03430633 | 11 | 119,580,588 | 1.76E-07 | 0.289 | 0.312 |          |       |     | <i>PVRL1</i>       | Body    |
| cg12477452 | 3  | 11,237,939  | 0.000138 | 0.289 | 0.315 |          |       |     | <i>HRH1</i>        | 5'UTR   |
| cg07019438 | 14 | 34,419,546  | 0.007157 | 0.289 | 0.321 |          |       |     | <i>EGLN3</i>       | Body    |
| cg20680163 | 8  | 145,033,743 | 8.45E-09 | 0.289 | 0.259 |          |       |     | <i>PLEC1</i>       | Body    |
| cg08545463 | 11 | 108,459,708 | 3.07E-08 | 0.289 | 0.288 |          |       |     | <i>EXPH5</i>       | Body    |
| cg05599160 | 5  | 124,536,183 | 3.26E-07 | 0.289 | 0.290 |          |       |     |                    |         |
| cg15681358 | 10 | 99,474,521  | 0.000209 | 0.289 | 0.143 |          |       |     | <i>MARVELD1</i>    | Body    |
| cg20567847 | 7  | 155,167,038 | 0.022799 | 0.289 | 0.289 |          |       |     |                    |         |
| cg24770158 | 17 | 8,241,765   | 3.03E-07 | 0.289 | 0.284 |          |       |     | <i>ODF4</i>        | TSS1500 |
| cg25001190 | 1  | 61,668,835  | 5.26E-13 | 0.289 | 0.269 |          |       |     | <i>NFIA</i>        | Body    |
| cg09799983 | 2  | 38,301,756  | 0.021467 | 0.289 | 0.340 |          |       |     | <i>CYP1B1</i>      | Body    |
| cg06427779 | 5  | 54,180,079  | 2.54E-08 | 0.289 | 0.335 |          |       |     |                    |         |
| cg16400350 | 21 | 46,414,569  | 2.65E-28 | 0.289 | 0.267 |          |       |     |                    |         |

|            |    |             |          |       |       |  |  |  |                |         |
|------------|----|-------------|----------|-------|-------|--|--|--|----------------|---------|
| cg18843682 | 12 | 54,425,156  | 7.48E-10 | 0.289 | 0.231 |  |  |  | <i>HOXC4</i>   | 5'UTR   |
| cg18972013 | 17 | 78,078,605  | 2.86E-12 | 0.289 | 0.287 |  |  |  | <i>GAA</i>     | Body    |
| cg16755924 | X  | 25,041,099  | 0.009936 | 0.289 | 0.265 |  |  |  |                |         |
| cg05159804 | 17 | 44,343,776  | 8.09E-08 | 0.289 | 0.199 |  |  |  |                |         |
| cg04857033 | 1  | 120,258,412 | 3.15E-12 | 0.289 | 0.257 |  |  |  | <i>PHGDH</i>   | Body    |
| cg13529335 | 9  | 2,157,942   | 0.014812 | 0.289 | 0.263 |  |  |  | <i>SMARCA2</i> | Body    |
| cg17715896 | 7  | 33,943,437  | 4.49E-10 | 0.289 | 0.270 |  |  |  |                |         |
| cg08441170 | 10 | 26,223,100  | 0.031579 | 0.289 | 0.346 |  |  |  | <i>MYO3A</i>   | 1stExon |
| cg06975048 | 17 | 7,826,155   | 0.000221 | 0.289 | 0.260 |  |  |  | <i>KCNAB3</i>  | 3'UTR   |
| cg17616646 | 11 | 67,271,660  | 0.001274 | 0.289 | 0.083 |  |  |  | <i>PITPNM1</i> | 5'UTR   |
| cg19678392 | 7  | 94,953,810  | 7.97E-13 | 0.289 | 0.258 |  |  |  | <i>PON1</i>    | 1stExon |
| cg01589998 | 12 | 109,729,478 | 0.004265 | 0.289 | 0.195 |  |  |  | <i>FOXN4</i>   | Body    |
| cg14150907 | 8  | 142,275,722 | 0.00507  | 0.289 | 0.265 |  |  |  |                |         |
| cg04748497 | X  | 101,906,989 | 0.000342 | 0.289 | 0.268 |  |  |  | <i>GPRASP1</i> | 5'UTR   |
| cg03609666 | 19 | 49,250,439  | 1.61E-06 | 0.289 | 0.283 |  |  |  | <i>IZUMO1</i>  | TSS1500 |
| cg14448830 | 9  | 79,627,216  | 0.015069 | 0.289 | 0.308 |  |  |  |                |         |
| cg12361088 | 11 | 19,695,688  | 2.31E-06 | 0.289 | 0.220 |  |  |  | <i>NAV2</i>    | Body    |
| cg07121182 | 7  | 99,156,011  | 0.001995 | 0.289 | 0.261 |  |  |  | <i>ZNF655</i>  | TSS200  |
| cg07870074 | 10 | 706,006     | 3.02E-08 | 0.289 | 0.294 |  |  |  | <i>DIP2C</i>   | Body    |
| cg22475071 | 3  | 64,338,594  | 2.74E-10 | 0.289 | 0.289 |  |  |  |                |         |
| cg09642925 | 2  | 114,261,793 | 0.00293  | 0.289 | 0.182 |  |  |  |                |         |
| cg25090510 | 5  | 156,886,990 | 0.00094  | 0.289 | 0.203 |  |  |  | <i>NIPAL4</i>  | TSS200  |
| cg05262436 | 6  | 137,815,569 | 0.006543 | 0.289 | 0.358 |  |  |  | <i>OLIG3</i>   | TSS200  |
| cg22088219 | 7  | 74,064,567  | 0.001165 | 0.289 | 0.352 |  |  |  |                |         |
| cg16673477 | 19 | 18,812,017  | 0.003457 | 0.289 | 0.191 |  |  |  | <i>CRTC1</i>   | Body    |
| cg25572367 | 12 | 25,538,380  | 0.01536  | 0.289 | 0.162 |  |  |  |                |         |
| cg01519225 | 6  | 29,895,005  | 0.000443 | 0.289 | 0.371 |  |  |  |                |         |
| cg03890691 | 16 | 30,023,615  | 8.98E-12 | 0.289 | 0.296 |  |  |  | <i>DOC2A</i>   | TSS1500 |
| cg16082058 | 9  | 100,265,072 | 6.73E-18 | 0.289 | 0.277 |  |  |  | <i>TMOD1</i>   | 5'UTR   |
| cg15046818 | 12 | 96,587,840  | 0.012997 | 0.289 | 0.237 |  |  |  | <i>ELK3</i>    | TSS1500 |
| cg01377268 | 2  | 239,925,497 | 1.47E-08 | 0.289 | 0.253 |  |  |  |                |         |
| cg07018404 | 5  | 126,193,470 | 1.16E-13 | 0.289 | 0.291 |  |  |  |                |         |
| cg01874867 | 7  | 94,954,059  | 8.42E-09 | 0.289 | 0.254 |  |  |  | <i>PON1</i>    | TSS200  |
| cg04120686 | 3  | 169,384,410 | 2.3E-08  | 0.289 | 0.288 |  |  |  |                |         |

|            |    |             |          |       |       |       |       |  |                  |         |
|------------|----|-------------|----------|-------|-------|-------|-------|--|------------------|---------|
| cg22771759 | 13 | 24,902,376  | 0.030805 | 0.289 | 0.322 |       |       |  |                  |         |
| cg24274579 | 17 | 59,534,637  | 2.75E-08 | 0.289 | 0.261 |       |       |  | <i>TBX4</i>      | Body    |
| cg06924459 | 6  | 17,102,643  | 0.000436 | 0.289 | 0.148 |       |       |  |                  |         |
| cg08049853 | 4  | 41,875,784  | 0.00028  | 0.289 | 0.293 |       |       |  |                  |         |
| cg08941457 | 20 | 25,129,562  | 8.23E-09 | 0.289 | 0.285 |       |       |  | <i>LOC284798</i> | TSS1500 |
| cg17001627 | 11 | 47,599,391  | 4.95E-21 | 0.289 | 0.255 |       |       |  | <i>KBTD4</i>     | Body    |
| cg20532370 | 3  | 139,258,730 | 0.012272 | 0.289 | 0.124 |       |       |  | <i>RBP1</i>      | TSS200  |
| cg19592439 | 3  | 138,665,957 | 0.006767 | 0.289 | 0.218 |       |       |  | <i>FOXL2</i>     | 1stExon |
| cg24304093 | 11 | 14,926,738  | 0.001884 | 0.289 | 0.289 |       |       |  |                  |         |
| cg00697992 | 2  | 139,537,131 | 0.009745 | 0.289 | 0.295 |       |       |  | <i>NXPH2</i>     | Body    |
| cg13462843 | 9  | 37,025,769  | 0.003939 | 0.289 | 0.382 |       |       |  | <i>PAX5</i>      | Body    |
| cg08691567 | 12 | 53,183,930  | 8.46E-07 | 0.289 | 0.318 |       |       |  | <i>KRT3</i>      | Body    |
| cg26296488 | 4  | 9,783,192   | 0.014355 | 0.289 | 0.388 |       |       |  | <i>DRD5</i>      | TSS200  |
| cg13738299 | 13 | 46,189,906  | 0.002499 | 0.289 | 0.330 |       |       |  | <i>FAM194B</i>   | TSS200  |
| cg08278357 | 19 | 59,050,122  | 0.003304 | 0.289 | 0.273 |       |       |  |                  |         |
| cg00788521 | 12 | 2,229,269   | 9.72E-12 | 0.289 | 0.303 |       |       |  | <i>CACNA1C</i>   | Body    |
| cg02457623 | 1  | 203,599,089 | 3.87E-05 | 0.289 | 0.248 |       |       |  | <i>ATP2B4</i>    | 5'UTR   |
| cg00737978 | 18 | 13,611,807  | 1.24E-07 | 0.289 | 0.248 |       |       |  | <i>C18orf1</i>   | 5'UTR   |
| cg18864674 | 1  | 21,058,007  | 9.12E-09 | 0.289 | 0.285 |       |       |  | <i>SH2D5</i>     | 5'UTR   |
| cg07811110 | 12 | 85,307,131  | 0.025973 | 0.289 | 0.284 |       |       |  | <i>SLC6A15</i>   | TSS1500 |
| cg16354201 | 1  | 33,938,307  | 0.01921  | 0.289 | 0.226 |       |       |  | <i>ZSCAN20</i>   | 5'UTR   |
| cg13063274 | 3  | 112,870,238 | 6.58E-19 | 0.289 | 0.295 |       |       |  |                  |         |
| cg14665901 | 11 | 12,885,131  | 6.76E-09 | 0.289 | 0.262 |       |       |  | <i>TEAD1</i>     | Body    |
| cg25874119 | 1  | 228,633,904 | 0.000373 | 0.289 | 0.357 |       |       |  |                  |         |
| cg25913520 | 4  | 13,524,041  | 0.005336 | 0.289 | 0.314 |       |       |  |                  |         |
| cg05287372 | 3  | 69,058,876  | 6.39E-20 | 0.289 | 0.293 |       |       |  | <i>C3orf64</i>   | Body    |
| cg00641409 | 6  | 21,666,778  | 0.018469 | 0.288 | 0.327 |       |       |  | <i>FLJ22536</i>  | Body    |
| cg02866639 | 17 | 1,808,743   | 5.15E-12 | 0.288 | 0.223 |       |       |  |                  |         |
| cg16355945 | 12 | 132,654,742 | 0.006798 | 0.288 | 0.261 |       |       |  |                  |         |
| cg05345286 | 6  | 41,606,641  | 0.000303 | 0.288 | 0.198 | 3E-09 | 0.158 |  | <i>MDF1</i>      | Body    |
| cg23949389 | 5  | 122,621,186 | 4.96E-06 | 0.288 | 0.283 |       |       |  |                  |         |
| cg24444188 | 1  | 200,992,385 | 0.023746 | 0.288 | 0.168 |       |       |  | <i>KIF21B</i>    | Body    |
| cg12549600 | 1  | 113,287,034 | 1.64E-05 | 0.288 | 0.244 |       |       |  |                  |         |
| cg03188000 | 12 | 68,634,913  | 3.15E-08 | 0.288 | 0.237 |       |       |  |                  |         |

|            |    |             |          |       |       |          |       |  |                 |         |
|------------|----|-------------|----------|-------|-------|----------|-------|--|-----------------|---------|
| cg07314829 | 1  | 112,058,397 | 6.32E-11 | 0.288 | 0.291 |          |       |  | <i>ADORA3</i>   | Body    |
| cg16672562 | 19 | 46,801,672  | 1.64E-12 | 0.288 | 0.293 |          |       |  | <i>HIF3A</i>    | 5'UTR   |
| cg05510665 | 6  | 137,834,607 | 1.1E-05  | 0.288 | 0.288 |          |       |  |                 |         |
| cg07179669 | 1  | 221,054,707 | 2.05E-07 | 0.288 | 0.268 |          |       |  | <i>HLX</i>      | Body    |
| cg15035437 | X  | 63,005,077  | 0.027054 | 0.288 | 0.344 |          |       |  |                 |         |
| cg04518342 | 5  | 131,593,106 | 0.003519 | 0.288 | 0.196 |          |       |  | <i>PDLIM4</i>   | TSS1500 |
| cg06430509 | 21 | 44,853,470  | 2.91E-22 | 0.288 | 0.276 |          |       |  |                 |         |
| cg00656735 | 6  | 41,470,922  | 5.96E-15 | 0.288 | 0.287 |          |       |  |                 |         |
| cg01813139 | 9  | 139,580,970 | 9.48E-05 | 0.288 | 0.217 |          |       |  | <i>AGPAT2</i>   | Body    |
| cg02016195 | 9  | 132,198,822 | 3.02E-14 | 0.288 | 0.283 |          |       |  |                 |         |
| cg02399524 | 11 | 63,258,509  | 1.8E-05  | 0.288 | 0.282 |          |       |  | <i>HRASLS5</i>  | 1stExon |
| cg10017626 | 2  | 65,085,243  | 2.05E-11 | 0.288 | 0.254 |          |       |  |                 |         |
| cg12182937 | 6  | 33,215,649  | 4.03E-17 | 0.288 | 0.281 |          |       |  |                 |         |
| cg24856140 | 1  | 146,556,382 | 0.000794 | 0.288 | 0.280 |          |       |  |                 |         |
| cg23273897 | 3  | 154,796,861 | 0.000972 | 0.288 | 0.161 | 9.66E-24 | 0.162 |  | <i>MME</i>      | TSS1500 |
| cg11482422 | 10 | 11,206,813  | 0.002118 | 0.288 | 0.184 |          |       |  | <i>CUGBP2</i>   | TSS200  |
| cg17928286 | 1  | 205,414,220 | 2.04E-12 | 0.288 | 0.280 |          |       |  |                 |         |
| cg23754918 | 7  | 2,653,733   | 3.54E-20 | 0.288 | 0.267 |          |       |  | <i>IQCE</i>     | 3'UTR   |
| cg21938261 | 5  | 146,257,862 | 0.026004 | 0.288 | 0.309 |          |       |  | <i>PPP2R2B</i>  | 5'UTR   |
| cg01010188 | 5  | 172,753,741 | 0.001478 | 0.288 | 0.237 |          |       |  | <i>STC2</i>     | Body    |
| cg18735810 | 5  | 50,260,204  | 1.63E-05 | 0.288 | 0.222 |          |       |  |                 |         |
| cg25178683 | 17 | 76,976,267  | 1.21E-06 | 0.288 | 0.240 |          |       |  | <i>LGALS3BP</i> | TSS1500 |
| cg02120582 | 11 | 104,034,754 | 0.043405 | 0.288 | 0.320 |          |       |  | <i>PDGFD</i>    | 5'UTR   |
| cg00957641 | 12 | 103,406,953 | 0.00117  | 0.288 | 0.190 |          |       |  |                 |         |
| cg11852579 | 4  | 3,657,880   | 0.002204 | 0.288 | 0.278 |          |       |  |                 |         |
| cg14876117 | 14 | 51,428,973  | 7.01E-14 | 0.288 | 0.290 |          |       |  |                 |         |
| cg03620376 | 19 | 54,984,272  | 1.45E-05 | 0.288 | 0.289 | 2.6E-09  | 0.130 |  | <i>CDC42EP5</i> | 5'UTR   |
| cg11721100 | X  | 20,134,346  | 5.58E-05 | 0.288 | 0.297 |          |       |  | <i>MAP7D2</i>   | Body    |
| cg17881208 | 12 | 55,378,912  | 5.69E-08 | 0.288 | 0.267 |          |       |  | <i>KIAA0748</i> | TSS1500 |
| cg21951301 | 12 | 5,542,527   | 0.001682 | 0.288 | 0.246 |          |       |  | <i>NTF3</i>     | Body    |
| cg24430419 | 1  | 61,519,532  | 1.03E-05 | 0.288 | 0.260 |          |       |  |                 |         |
| cg26123256 | 2  | 27,530,670  | 8.1E-10  | 0.288 | 0.259 |          |       |  | <i>UCN</i>      | Body    |
| cg04937080 | 1  | 58,715,532  | 0.002136 | 0.288 | 0.252 |          |       |  | <i>DAB1</i>     | 5'UTR   |
| cg18607411 | 13 | 80,911,808  | 3.71E-06 | 0.288 | 0.282 |          |       |  | <i>SPRY2</i>    | Body    |

|            |    |             |          |       |       |          |       |  |                  |         |
|------------|----|-------------|----------|-------|-------|----------|-------|--|------------------|---------|
| cg23108728 | 2  | 220,117,875 | 0.003386 | 0.288 | 0.364 |          |       |  | <i>TUBA4B</i>    | TSS200  |
| cg02580986 | X  | 105,421,602 | 0.000359 | 0.288 | 0.206 |          |       |  | <i>MUM1L1</i>    | 5'UTR   |
| cg24667115 | 6  | 91,004,482  | 4.58E-07 | 0.288 | 0.235 |          |       |  | <i>BACH2</i>     | 5'UTR   |
| cg27262054 | 16 | 73,067,525  | 1.41E-08 | 0.288 | 0.270 |          |       |  | <i>ZFX3</i>      | 5'UTR   |
| cg03177042 | 6  | 166,422,671 | 4.15E-06 | 0.288 | 0.325 |          |       |  |                  |         |
| cg19463256 | 19 | 46,915,351  | 5.84E-10 | 0.288 | 0.257 |          |       |  | <i>CCDC8</i>     | 1stExon |
| cg14071612 | 9  | 112,081,275 | 0.012353 | 0.288 | 0.069 |          |       |  | <i>EPB41L4B</i>  | Body    |
| cg12251779 | 22 | 45,608,440  | 1.8E-05  | 0.288 | 0.254 |          |       |  | <i>C22orf9</i>   | Body    |
| cg17302155 | 6  | 100,061,111 | 0.003007 | 0.288 | 0.364 |          |       |  | <i>PRDM13</i>    | Body    |
| cg26809043 | 11 | 34,285,529  | 1.34E-22 | 0.288 | 0.280 |          |       |  | <i>ABTB2</i>     | Body    |
| cg13855924 | 6  | 39,281,183  | 3.41E-08 | 0.288 | 0.263 |          |       |  | <i>KCNK17</i>    | Body    |
| cg26795540 | 10 | 35,082,070  | 2.05E-19 | 0.288 | 0.270 |          |       |  | <i>PAR3</i>      | Body    |
| cg06390079 | 17 | 19,648,855  | 0.000891 | 0.288 | 0.281 |          |       |  | <i>ALDH3A1</i>   | 1stExon |
| cg19964273 | 6  | 168,745,827 | 1.44E-20 | 0.288 | 0.259 |          |       |  |                  |         |
| cg09417209 | 16 | 11,715,746  | 2.77E-06 | 0.288 | 0.269 |          |       |  |                  |         |
| cg12449685 | 11 | 124,768,950 | 8.66E-05 | 0.288 | 0.283 |          |       |  | <i>ROBO4</i>     | TSS1500 |
| cg02251349 | 8  | 74,004,752  | 5.25E-08 | 0.288 | 0.245 |          |       |  | <i>C8orf84</i>   | Body    |
| cg05436064 | 16 | 67,197,180  | 0.000739 | 0.288 | 0.346 |          |       |  | <i>HSF4</i>      | TSS200  |
| cg25601949 | X  | 3,630,407   | 0.003132 | 0.288 | 0.285 |          |       |  | <i>PRKX</i>      | Body    |
| cg22129364 | 1  | 53,067,894  | 2.55E-06 | 0.288 | 0.235 |          |       |  | <i>GPX7</i>      | TSS200  |
| cg22891070 | 19 | 46,801,642  | 8.47E-10 | 0.288 | 0.288 |          |       |  | <i>HIF3A</i>     | Body    |
| cg00155063 | 1  | 12,227,825  | 1.33E-15 | 0.288 | 0.273 |          |       |  | <i>TNFRSF1B</i>  | Body    |
| cg12193731 | 12 | 52,300,911  | 0.000351 | 0.288 | 0.267 |          |       |  | <i>ACVRL1</i>    | TSS1500 |
| cg25300386 | 7  | 94,023,988  | 4.52E-05 | 0.288 | 0.261 | 6.67E-09 | 0.152 |  | <i>COL1A2</i>    | 1stExon |
| cg24437737 | 1  | 149,400,352 | 1.11E-19 | 0.288 | 0.266 |          |       |  | <i>HIST2H2BF</i> | TSS1500 |
| cg11433866 | 12 | 115,126,908 | 6.81E-17 | 0.288 | 0.258 |          |       |  |                  |         |
| cg16626067 | 16 | 66,613,266  | 1.85E-06 | 0.288 | 0.250 |          |       |  | <i>CMTM2</i>     | TSS200  |
| cg00353923 | 7  | 127,671,044 | 0.002661 | 0.288 | 0.195 |          |       |  | <i>LRRC4</i>     | TSS200  |
| cg05052324 | 1  | 18,957,020  | 0.00797  | 0.288 | 0.320 |          |       |  | <i>PAX7</i>      | TSS1500 |
| cg13861122 | 9  | 91,849,710  | 0.023621 | 0.288 | 0.169 |          |       |  |                  |         |
| cg06851000 | 1  | 33,627,109  | 1.06E-10 | 0.288 | 0.261 |          |       |  | <i>TRIM62</i>    | Body    |
| cg15980797 | 6  | 137,813,648 | 3.47E-07 | 0.288 | 0.290 |          |       |  | <i>OLIG3</i>     | 1stExon |
| cg11956953 | 17 | 27,347,092  | 0.043683 | 0.288 | 0.072 |          |       |  |                  |         |
| cg07553475 | 6  | 21,665,800  | 0.03536  | 0.288 | 0.355 |          |       |  | <i>FLJ22536</i>  | TSS1500 |

|            |    |             |          |       |       |          |       |  |                     |         |
|------------|----|-------------|----------|-------|-------|----------|-------|--|---------------------|---------|
| cg00746446 | 2  | 23,879,137  | 9.44E-37 | 0.288 | 0.281 |          |       |  | <i>KLHL29</i>       | Body    |
| cg19048950 | 13 | 30,915,492  | 4.2E-09  | 0.287 | 0.270 |          |       |  | <i>LOC100188949</i> | Body    |
| cg25485392 | 19 | 3,358,039   | 5.76E-18 | 0.287 | 0.259 |          |       |  |                     |         |
| cg12683342 | 6  | 28,557,518  | 0.001718 | 0.287 | 0.239 |          |       |  |                     |         |
| cg19845249 | 17 | 77,819,279  | 2.81E-11 | 0.287 | 0.268 |          |       |  |                     |         |
| cg11269599 | 19 | 52,391,304  | 0.00386  | 0.287 | 0.278 |          |       |  | <i>ZNF577</i>       | TSS200  |
| cg26631984 | 2  | 17,719,375  | 0.002511 | 0.287 | 0.317 |          |       |  |                     |         |
| cg13779265 | X  | 105,970,597 | 0.000136 | 0.287 | 0.359 |          |       |  | <i>RNF128</i>       | 1stExon |
| cg01135546 | 17 | 45,949,828  | 0.000322 | 0.287 | 0.344 |          |       |  |                     |         |
| cg11749828 | 19 | 35,531,150  | 1.76E-07 | 0.287 | 0.280 |          |       |  | <i>SCN1B</i>        | 3'UTR   |
| cg00862041 | X  | 101,967,017 | 2.57E-09 | 0.287 | 0.266 | 1.61E-17 | 0.217 |  | <i>GPRASP2</i>      | TSS1500 |
| cg06833110 | 2  | 66,673,316  | 0.000103 | 0.287 | 0.313 |          |       |  | <i>MEIS1</i>        | Body    |
| cg21773967 | 17 | 15,166,047  | 0.013828 | 0.287 | 0.174 |          |       |  | <i>PMP22</i>        | TSS200  |
| cg09293816 | 19 | 50,015,532  | 1.63E-20 | 0.287 | 0.292 |          |       |  | <i>FCGRT</i>        | TSS200  |
| cg11911648 | 6  | 30,418,902  | 8.99E-06 | 0.287 | 0.288 |          |       |  |                     |         |
| cg03509106 | 4  | 121,992,261 | 1.34E-08 | 0.287 | 0.247 |          |       |  | <i>C4orf31</i>      | 5'UTR   |
| cg14752089 | 8  | 128,773,042 | 3.61E-10 | 0.287 | 0.279 |          |       |  |                     |         |
| cg19008877 | 10 | 78,157,854  | 3.14E-13 | 0.287 | 0.279 |          |       |  | <i>C10orf11</i>     | Body    |
| cg20707222 | 1  | 76,540,222  | 0.00231  | 0.287 | 0.250 |          |       |  | <i>ST6GALNAC3</i>   | TSS200  |
| cg08032476 | 17 | 27,045,176  | 7.36E-17 | 0.287 | 0.272 |          |       |  | <i>RAB34</i>        | Body    |
| cg13597397 | 9  | 133,320,948 | 0.004549 | 0.287 | 0.173 |          |       |  | <i>ASS1</i>         | 5'UTR   |
| cg15341350 | 12 | 119,446,891 | 0.006176 | 0.287 | 0.334 |          |       |  | <i>SRRM4</i>        | Body    |
| cg04839991 | 2  | 237,880,790 | 4.07E-08 | 0.287 | 0.251 |          |       |  |                     |         |
| cg11431957 | 3  | 38,035,999  | 0.015397 | 0.287 | 0.112 |          |       |  | <i>VILL</i>         | Body    |
| cg27211284 | 2  | 200,524,012 | 0.006558 | 0.287 | 0.266 |          |       |  |                     |         |
| cg23793104 | 4  | 85,401,758  | 3.96E-08 | 0.287 | 0.287 |          |       |  |                     |         |
| cg07475654 | 2  | 219,151,444 | 8.02E-05 | 0.287 | 0.376 |          |       |  | <i>PNKD</i>         | Body    |
| cg02613418 | 15 | 68,723,914  | 3.75E-08 | 0.287 | 0.273 |          |       |  | <i>ITGA11</i>       | Body    |
| cg17461735 | 9  | 82,185,498  | 0.00027  | 0.287 | 0.252 |          |       |  | <i>TLE4</i>         | TSS1500 |
| cg15744005 | 10 | 104,629,667 | 1.5E-05  | 0.287 | 0.206 |          |       |  | <i>AS3MT</i>        | Body    |
| cg17817532 | 10 | 70,322,874  | 3.16E-07 | 0.287 | 0.296 |          |       |  | <i>TET1</i>         | 5'UTR   |
| cg15271616 | 9  | 35,490,515  | 0.001176 | 0.287 | 0.145 | 5.96E-17 | 0.271 |  | <i>RUSC2</i>        | 5'UTR   |
| cg03381047 | 6  | 168,078,772 | 0.000379 | 0.287 | 0.234 |          |       |  |                     |         |
| cg22081832 | 3  | 64,670,459  | 3.69E-07 | 0.287 | 0.196 |          |       |  | <i>ADAMTS9</i>      | Body    |



|            |    |             |          |       |       |  |  |  |                  |         |
|------------|----|-------------|----------|-------|-------|--|--|--|------------------|---------|
| cg03507534 | 1  | 36,789,937  | 1.77E-12 | 0.287 | 0.269 |  |  |  | <i>FAM176B</i>   | TSS200  |
| cg17727929 | 21 | 38,069,338  | 0.004102 | 0.287 | 0.308 |  |  |  |                  |         |
| cg11928064 | 3  | 124,537,810 | 9.33E-24 | 0.287 | 0.281 |  |  |  | <i>ITGB5</i>     | Body    |
| cg03784628 | 11 | 64,059,937  | 4.54E-16 | 0.287 | 0.253 |  |  |  | <i>KCNK4</i>     | 5'UTR   |
| cg23229261 | 2  | 63,284,066  | 2.09E-06 | 0.287 | 0.302 |  |  |  | <i>OTX1</i>      | 3'UTR   |
| cg07992044 | 11 | 68,096,049  | 0.044051 | 0.287 | 0.169 |  |  |  | <i>LRP5</i>      | Body    |
| cg14273450 | 2  | 26,624,934  | 0.007756 | 0.287 | 0.108 |  |  |  | <i>C2orf39</i>   | 1stExon |
| cg09479818 | 19 | 33,880,790  | 2.32E-18 | 0.287 | 0.287 |  |  |  | <i>PEPD</i>      | Body    |
| cg13917047 | 17 | 15,406,213  | 0.020367 | 0.287 | 0.500 |  |  |  | <i>FAM18B2</i>   | Body    |
| cg12250049 | 15 | 83,951,663  | 4.22E-07 | 0.287 | 0.296 |  |  |  | <i>BNC1</i>      | Body    |
| cg00908833 | 6  | 50,810,432  | 0.00028  | 0.287 | 0.343 |  |  |  | <i>TFAP2B</i>    | Body    |
| cg27525524 | 1  | 16,468,313  | 1.65E-14 | 0.287 | 0.271 |  |  |  | <i>EPHA2</i>     | Body    |
| cg03071808 | 2  | 242,908,131 | 3.82E-07 | 0.287 | 0.258 |  |  |  |                  |         |
| cg04015962 | 1  | 10,949,192  | 2.37E-14 | 0.287 | 0.294 |  |  |  |                  |         |
| cg05526015 | 6  | 170,553,845 | 4.08E-50 | 0.287 | 0.279 |  |  |  |                  |         |
| cg00305281 | 22 | 42,316,176  | 5.94E-08 | 0.287 | 0.261 |  |  |  |                  |         |
| cg06605704 | 16 | 4,551,147   | 4.97E-06 | 0.287 | 0.319 |  |  |  | <i>HMOX2</i>     | 5'UTR   |
| cg09107912 | 6  | 159,590,059 | 0.000476 | 0.287 | 0.322 |  |  |  | <i>FNDC1</i>     | TSS1500 |
| cg09561125 | 7  | 108,097,477 | 5.74E-09 | 0.287 | 0.276 |  |  |  | <i>NRCAM</i>     | TSS1500 |
| cg26419656 | 13 | 74,707,400  | 0.00098  | 0.287 | 0.316 |  |  |  | <i>KLF12</i>     | 5'UTR   |
| cg26983469 | 10 | 17,271,051  | 0.010165 | 0.287 | 0.334 |  |  |  | <i>VIM</i>       | 5'UTR   |
| cg01083633 | 10 | 44,162,781  | 1.64E-05 | 0.287 | 0.206 |  |  |  |                  |         |
| cg08807892 | 2  | 162,101,083 | 0.047349 | 0.287 | 0.297 |  |  |  |                  |         |
| cg13433012 | 12 | 57,635,954  | 0.000854 | 0.287 | 0.225 |  |  |  | <i>NDUFA4L2</i>  | TSS1500 |
| cg01165355 | 3  | 64,225,108  | 3.66E-14 | 0.287 | 0.242 |  |  |  |                  |         |
| cg09065714 | 2  | 27,531,535  | 5.94E-14 | 0.287 | 0.292 |  |  |  | <i>UCN</i>       | TSS1500 |
| cg27473895 | 10 | 102,497,354 | 9.39E-09 | 0.287 | 0.296 |  |  |  |                  |         |
| cg23209990 | 4  | 55,097,576  | 0.004858 | 0.287 | 0.262 |  |  |  | <i>PDGFRA</i>    | 5'UTR   |
| cg10967191 | 16 | 49,888,604  | 1.4E-05  | 0.287 | 0.216 |  |  |  |                  |         |
| cg20589883 | 4  | 111,115,135 | 5.79E-06 | 0.287 | 0.248 |  |  |  | <i>ELOVL6</i>    | Body    |
| cg08551248 | 1  | 40,255,129  | 0.000175 | 0.287 | 0.176 |  |  |  | <i>BMP8B</i>     | TSS1500 |
| cg22620090 | 6  | 105,400,993 | 0.042332 | 0.287 | 0.341 |  |  |  |                  |         |
| cg26919186 | 18 | 56,701,751  | 2.62E-09 | 0.287 | 0.252 |  |  |  | <i>LOC390858</i> | TSS1500 |
| cg27327911 | 16 | 54,969,146  | 0.001373 | 0.287 | 0.366 |  |  |  |                  |         |

|            |    |             |          |       |       |  |  |  |                 |         |
|------------|----|-------------|----------|-------|-------|--|--|--|-----------------|---------|
| cg24892362 | 3  | 184,319,417 | 4.4E-06  | 0.287 | 0.230 |  |  |  |                 |         |
| cg01566555 | 3  | 125,931,744 | 0.020727 | 0.287 | 0.207 |  |  |  |                 |         |
| cg23451221 | 10 | 135,160,726 | 6.07E-08 | 0.287 | 0.255 |  |  |  | <i>PRAP1</i>    | TSS200  |
| cg23348764 | 5  | 140,749,834 | 0.002265 | 0.287 | 0.365 |  |  |  | <i>PCDHGA4</i>  | Body    |
| cg23695707 | 14 | 95,234,826  | 5.82E-05 | 0.287 | 0.299 |  |  |  | <i>GSC</i>      | 3'UTR   |
| cg19908556 | 11 | 32,355,022  | 0.014426 | 0.287 | 0.231 |  |  |  |                 |         |
| cg19258665 | 7  | 157,482,508 | 0.000696 | 0.287 | 0.276 |  |  |  | <i>PTPRN2</i>   | Body    |
| cg00349061 | 1  | 26,371,865  | 1.23E-13 | 0.287 | 0.272 |  |  |  | <i>SLC30A2</i>  | Body    |
| cg08639379 | 1  | 95,018,889  | 1.27E-13 | 0.287 | 0.274 |  |  |  |                 |         |
| cg15222899 | 18 | 55,095,249  | 0.000237 | 0.287 | 0.304 |  |  |  |                 |         |
| cg23645199 | 2  | 233,498,625 | 5.1E-08  | 0.287 | 0.260 |  |  |  | <i>EFHD1</i>    | 1stExon |
| cg08124446 | 11 | 43,596,529  | 0.00111  | 0.287 | 0.312 |  |  |  |                 |         |
| cg16725974 | 14 | 64,341,178  | 3.42E-10 | 0.287 | 0.292 |  |  |  | <i>SYNE2</i>    | 5'UTR   |
| cg20498859 | 3  | 154,145,810 | 0.001507 | 0.286 | 0.236 |  |  |  | <i>GPR149</i>   | Body    |
| cg02480199 | 5  | 145,725,913 | 1.47E-07 | 0.286 | 0.289 |  |  |  |                 |         |
| cg15756227 | 4  | 185,937,405 | 1.31E-07 | 0.286 | 0.305 |  |  |  |                 |         |
| cg00731785 | 4  | 15,704,680  | 0.01358  | 0.286 | 0.329 |  |  |  | <i>BST1</i>     | 1stExon |
| cg01763749 | 22 | 21,368,291  | 0.000517 | 0.286 | 0.253 |  |  |  | <i>P2RX6</i>    | TSS1500 |
| cg01806741 | 6  | 1,527,072   | 3.75E-07 | 0.286 | 0.227 |  |  |  |                 |         |
| cg12131828 | 17 | 46,663,648  | 2.72E-09 | 0.286 | 0.282 |  |  |  |                 |         |
| cg14555350 | 5  | 142,580,618 | 5.05E-17 | 0.286 | 0.275 |  |  |  | <i>ARHGAP26</i> | Body    |
| cg18795461 | 1  | 36,591,112  | 0.004296 | 0.286 | 0.242 |  |  |  |                 |         |
| cg04463386 | 11 | 75,295,186  | 2.04E-15 | 0.286 | 0.256 |  |  |  |                 |         |
| cg18501395 | 8  | 12,293,513  | 0.005708 | 0.286 | 0.200 |  |  |  | <i>FAM86B2</i>  | Body    |
| cg02722657 | 17 | 38,334,439  | 5.54E-12 | 0.286 | 0.270 |  |  |  | <i>RAPGEFL1</i> | 1stExon |
| cg12788878 | 3  | 124,860,616 | 1.48E-06 | 0.286 | 0.248 |  |  |  | <i>SLC12A8</i>  | Body    |
| cg19385331 | 13 | 100,641,867 | 0.000453 | 0.286 | 0.282 |  |  |  |                 |         |
| cg20427486 | 2  | 162,849,137 | 2.64E-15 | 0.286 | 0.269 |  |  |  | <i>DPP4</i>     | 3'UTR   |
| cg03389653 | 16 | 49,316,197  | 0.027964 | 0.286 | 0.380 |  |  |  | <i>CBLN1</i>    | TSS1500 |
| cg08264895 | 14 | 70,060,335  | 4.07E-28 | 0.286 | 0.293 |  |  |  |                 |         |
| cg12864389 | 8  | 145,025,178 | 2.16E-07 | 0.286 | 0.313 |  |  |  | <i>PLEC1</i>    | Body    |
| cg24478096 | 2  | 160,761,085 | 4.24E-06 | 0.286 | 0.287 |  |  |  | <i>LY75</i>     | Body    |
| cg02858512 | 17 | 1,992,954   | 3.86E-05 | 0.286 | 0.247 |  |  |  | <i>SMG6</i>     | Body    |
| cg11731890 | 6  | 26,271,827  | 0.011961 | 0.286 | 0.294 |  |  |  | <i>HIST1H3G</i> | TSS1500 |

|            |    |             |          |       |       |          |       |     |                 |         |
|------------|----|-------------|----------|-------|-------|----------|-------|-----|-----------------|---------|
| cg05899618 | 2  | 20,865,847  | 0.001449 | 0.286 | 0.268 | 1.86E-16 | 0.178 |     | <i>GDF7</i>     | TSS1500 |
| cg18043690 | X  | 68,348,774  | 7.55E-07 | 0.286 | 0.318 |          |       |     |                 |         |
| cg20314331 | 2  | 131,129,567 | 0.000671 | 0.286 | 0.233 |          |       |     | <i>PTPN18</i>   | Body    |
| cg05160558 | 4  | 70,389,517  | 1.51E-06 | 0.286 | 0.311 |          |       | Yes |                 |         |
| cg06496484 | 2  | 176,946,509 | 0.001521 | 0.286 | 0.300 |          |       | Yes | <i>EVX2</i>     | Body    |
| cg17486263 | 1  | 200,011,726 | 9.7E-05  | 0.286 | 0.339 |          |       |     | <i>NR5A2</i>    | Body    |
| cg07239592 | 7  | 39,453,625  | 0.015533 | 0.286 | 0.217 |          |       |     | <i>POU6F2</i>   | Body    |
| cg13899718 | 1  | 150,947,832 | 1.91E-07 | 0.286 | 0.252 |          |       |     | <i>LASS2</i>    | TSS1500 |
| cg09854626 | 16 | 1,030,568   | 4.67E-09 | 0.286 | 0.283 |          |       |     | <i>SOX8</i>     | TSS1500 |
| cg06260709 | 20 | 48,626,621  | 2.93E-17 | 0.286 | 0.273 |          |       |     |                 |         |
| cg11926610 | 15 | 37,403,211  | 2.68E-07 | 0.286 | 0.240 |          |       |     |                 |         |
| cg12267236 | 1  | 117,527,582 | 1.19E-21 | 0.286 | 0.299 |          |       |     | <i>PTGFRN</i>   | Body    |
| cg21627409 | 5  | 140,810,106 | 0.001065 | 0.286 | 0.341 |          |       |     | <i>PCDHGA4</i>  | Body    |
| cg14935626 | 2  | 17,776,015  | 1.43E-06 | 0.286 | 0.268 |          |       |     | <i>VSNL1</i>    | Body    |
| cg02030008 | 7  | 157,476,930 | 0.022641 | 0.286 | 0.129 |          |       |     | <i>PTPRN2</i>   | Body    |
| cg06135689 | 17 | 35,085,060  | 9.45E-10 | 0.286 | 0.283 |          |       |     |                 |         |
| cg16136290 | 1  | 112,280,233 | 1.17E-26 | 0.286 | 0.297 |          |       |     | <i>C1orf183</i> | Body    |
| cg22675922 | 11 | 2,889,840   | 0.000118 | 0.286 | 0.291 |          |       |     | <i>KCNQ1DN</i>  | TSS1500 |
| cg11905624 | 19 | 16,186,848  | 4.62E-05 | 0.286 | 0.271 |          |       |     | <i>TPM4</i>     | Body    |
| cg03426023 | 16 | 54,972,078  | 0.0015   | 0.286 | 0.293 |          |       |     |                 |         |
| cg25029264 | 15 | 81,426,347  | 0.00459  | 0.286 | 0.240 |          |       |     | <i>C15orf26</i> | TSS1500 |
| cg19690403 | 12 | 117,470,568 | 1.61E-14 | 0.286 | 0.248 |          |       |     |                 |         |
| cg00599564 | 6  | 29,943,209  | 2.38E-06 | 0.286 | 0.289 |          |       |     | <i>HCG9</i>     | Body    |
| cg19682013 | 15 | 45,996,608  | 1.49E-05 | 0.286 | 0.274 |          |       |     |                 |         |
| cg13947167 | 9  | 34,555,109  | 3.07E-15 | 0.286 | 0.257 |          |       |     | <i>CNTFR</i>    | Body    |
| cg18400324 | 2  | 132,286,430 | 3.47E-11 | 0.286 | 0.278 |          |       |     | <i>CCDC74A</i>  | Body    |
| cg20403557 | 5  | 115,299,088 | 5.64E-05 | 0.286 | 0.324 |          |       |     | <i>LVRN</i>     | Body    |
| cg22241045 | 4  | 54,363,911  | 3.42E-17 | 0.286 | 0.267 |          |       |     | <i>LNX1</i>     | Body    |
| cg15924332 | 10 | 7,710,179   | 1.24E-10 | 0.286 | 0.285 |          |       |     | <i>ITIH5</i>    | TSS1500 |
| cg19192590 | 2  | 178,524,533 | 1.33E-06 | 0.286 | 0.307 |          |       |     | <i>PDE11A</i>   | Body    |
| cg01422262 | 1  | 108,506,291 | 0.000148 | 0.286 | 0.160 |          |       |     | <i>VAV3</i>     | Body    |
| cg08582485 | 20 | 22,557,518  | 1.16E-07 | 0.286 | 0.280 |          |       |     | <i>C20orf56</i> | Body    |
| cg12051762 | 11 | 117,069,788 | 3.75E-07 | 0.286 | 0.315 |          |       |     | <i>TAGLN</i>    | TSS1500 |
| cg13939978 | 4  | 57,522,881  | 1.94E-11 | 0.286 | 0.276 |          |       |     | <i>HOPX</i>     | 5'UTR   |

|            |    |             |          |       |       |  |  |     |                 |         |
|------------|----|-------------|----------|-------|-------|--|--|-----|-----------------|---------|
| cg23207077 | 1  | 905,988     | 4.07E-13 | 0.286 | 0.275 |  |  |     | <i>PLEKHN1</i>  | Body    |
| cg11284797 | 11 | 18,067,816  | 0.005262 | 0.286 | 0.258 |  |  |     |                 |         |
| cg10167837 | 2  | 17,699,762  | 0.040262 | 0.286 | 0.334 |  |  |     | <i>RAD51AP2</i> | TSS200  |
| cg14908245 | 8  | 23,619,180  | 4.98E-05 | 0.286 | 0.288 |  |  |     |                 |         |
| cg04607372 | 5  | 54,523,900  | 3.63E-11 | 0.286 | 0.283 |  |  |     |                 |         |
| cg16047144 | 17 | 62,097,953  | 0.00071  | 0.286 | 0.279 |  |  |     | <i>ICAM2</i>    | 5'UTR   |
| cg17785773 | 5  | 78,408,347  | 8.9E-10  | 0.286 | 0.279 |  |  |     | <i>BHMT</i>     | Body    |
| cg24960947 | 11 | 65,816,463  | 0.000316 | 0.286 | 0.285 |  |  |     | <i>GAL3ST3</i>  | 5'UTR   |
| cg26570179 | 8  | 99,960,500  | 1.04E-06 | 0.286 | 0.296 |  |  |     | <i>OSR2</i>     | 5'UTR   |
| cg19535672 | 2  | 27,530,455  | 1.05E-13 | 0.286 | 0.265 |  |  |     | <i>UCN</i>      | Body    |
| cg07475885 | 2  | 85,107,320  | 0.016704 | 0.286 | 0.388 |  |  |     | <i>C2orf89</i>  | Body    |
| cg22092811 | 3  | 99,595,145  | 0.002557 | 0.286 | 0.302 |  |  |     | <i>C3orf26</i>  | Body    |
| cg23274680 | 10 | 94,828,605  | 0.0002   | 0.286 | 0.187 |  |  |     |                 |         |
| cg19542753 | 5  | 180,252,309 | 6.49E-19 | 0.286 | 0.263 |  |  | Yes |                 |         |
| cg23729417 | 2  | 118,593,926 | 1.51E-05 | 0.286 | 0.304 |  |  |     |                 |         |
| cg07665510 | 17 | 55,952,063  | 2.87E-06 | 0.286 | 0.291 |  |  |     | <i>CUEDC1</i>   | Body    |
| cg00089798 | 12 | 62,585,204  | 0.001552 | 0.286 | 0.285 |  |  |     | <i>FAM19A2</i>  | 5'UTR   |
| cg07045089 | 1  | 3,620,218   | 0.00617  | 0.286 | 0.463 |  |  |     | <i>TP73</i>     | Body    |
| cg09507790 | 18 | 19,752,343  | 2.72E-12 | 0.286 | 0.264 |  |  |     | <i>GATA6</i>    | Body    |
| cg04887494 | 19 | 2,252,786   | 0.00142  | 0.286 | 0.266 |  |  |     | <i>JSRP1</i>    | Body    |
| cg17854416 | 22 | 37,720,647  | 7.34E-10 | 0.286 | 0.269 |  |  |     |                 |         |
| cg20897119 | 7  | 116,164,422 | 0.000782 | 0.286 | 0.303 |  |  |     | <i>CAV1</i>     | TSS1500 |
| cg09476067 | 6  | 30,418,581  | 7.78E-11 | 0.286 | 0.282 |  |  |     |                 |         |
| cg10616974 | 17 | 74,511,719  | 7.72E-16 | 0.286 | 0.277 |  |  |     |                 |         |
| cg13609645 | 6  | 143,555,173 | 3.13E-20 | 0.286 | 0.264 |  |  |     | <i>AIG1</i>     | Body    |
| cg05083414 | 4  | 2,627,039   | 4.04E-19 | 0.286 | 0.294 |  |  |     | <i>FAM193A</i>  | TSS200  |
| cg23109344 | 8  | 496,440     | 4.53E-13 | 0.286 | 0.253 |  |  |     | <i>C8orf42</i>  | TSS1500 |
| cg03426888 | 6  | 32,156,527  | 1.4E-15  | 0.286 | 0.253 |  |  |     | <i>PBX2</i>     | Body    |
| cg09919570 | 16 | 49,311,782  | 0.008241 | 0.286 | 0.235 |  |  |     |                 |         |
| cg02010682 | 8  | 99,954,432  | 0.000143 | 0.286 | 0.301 |  |  |     |                 |         |
| cg02936049 | 3  | 141,102,599 | 0.04545  | 0.286 | 0.181 |  |  |     | <i>ZBTB38</i>   | 5'UTR   |
| cg10839385 | 1  | 159,825,049 | 2.42E-06 | 0.286 | 0.253 |  |  |     | <i>VSIG8</i>    | Body    |
| cg19412791 | 5  | 180,633,063 | 0.0005   | 0.286 | 0.227 |  |  |     | <i>TRIM7</i>    | TSS1500 |
| cg15411272 | 6  | 29,895,187  | 3.3E-08  | 0.286 | 0.269 |  |  |     |                 |         |

|            |    |             |          |       |       |           |       |     |                 |         |
|------------|----|-------------|----------|-------|-------|-----------|-------|-----|-----------------|---------|
| cg22056595 | 7  | 158,293,463 | 4.38E-11 | 0.286 | 0.258 |           |       | Yes | <i>PTPRN2</i>   | Body    |
| cg25953350 | 11 | 45,167,368  | 3.5E-07  | 0.286 | 0.308 |           |       |     | <i>PRDM11</i>   | Body    |
| cg00262776 | 12 | 14,720,726  | 3.27E-06 | 0.286 | 0.172 |           |       |     | <i>PLBD1</i>    | 1stExon |
| cg02049405 | 6  | 30,095,265  | 1E-16    | 0.286 | 0.283 |           |       |     |                 |         |
| cg11467015 | 17 | 77,786,853  | 0.003894 | 0.286 | 0.301 |           |       |     |                 |         |
| cg21493127 | 5  | 16,617,587  | 1.57E-14 | 0.286 | 0.237 |           |       |     | <i>FAM134B</i>  | TSS1500 |
| cg08372619 | 8  | 109,799,518 | 0.003691 | 0.286 | 0.165 |           |       |     | <i>TMEM74</i>   | 5'UTR   |
| cg27282530 | 3  | 125,898,680 | 3.43E-08 | 0.286 | 0.299 |           |       |     | <i>ALDH1L1</i>  | 5'UTR   |
| cg10378032 | 1  | 65,214,497  | 1.48E-21 | 0.285 | 0.276 |           |       |     | <i>RAVER2</i>   | Body    |
| cg10786043 | 8  | 38,643,568  | 6.32E-13 | 0.285 | 0.283 |           |       |     | <i>TACC1</i>    | TSS1500 |
| cg10708761 | 2  | 39,892,612  | 0.009352 | 0.285 | 0.309 |           |       |     | <i>TMEM178</i>  | TSS1500 |
| cg25575732 | 10 | 52,177,880  | 1.31E-06 | 0.285 | 0.289 |           |       |     | <i>SGMS1</i>    | 5'UTR   |
| cg23183069 | 6  | 168,778,242 | 1.82E-13 | 0.285 | 0.258 |           |       |     |                 |         |
| cg05298922 | 2  | 175,191,045 | 0.010932 | 0.285 | 0.260 |           |       |     |                 |         |
| cg23019889 | 1  | 146,544,044 | 3.29E-27 | 0.285 | 0.299 |           |       |     |                 |         |
| cg14875171 | 2  | 50,574,196  | 0.000234 | 0.285 | 0.257 |           |       |     | <i>NRXN1</i>    | Body    |
| cg26338453 | 15 | 82,340,023  | 0.017469 | 0.285 | 0.203 |           |       |     |                 |         |
| cg02657832 | 2  | 201,450,633 | 0.000217 | 0.285 | 0.260 |           |       |     | <i>AOX1</i>     | TSS200  |
| cg17058383 | 13 | 113,624,866 | 1.06E-17 | 0.285 | 0.268 |           |       |     | <i>MCF2L</i>    | Body    |
| cg17799033 | 7  | 157,476,329 | 9.86E-11 | 0.285 | 0.263 |           |       |     | <i>PTPRN2</i>   | Body    |
| cg13862927 | 9  | 72,158,091  | 2.03E-09 | 0.285 | 0.294 |           |       |     | <i>APBA1</i>    | 5'UTR   |
| cg13883696 | 1  | 61,519,888  | 0.000115 | 0.285 | 0.270 |           |       |     |                 |         |
| cg05143735 | 2  | 127,978,490 | 9.35E-08 | 0.285 | 0.270 |           |       |     |                 |         |
| cg17071045 | 4  | 54,969,609  | 3.05E-09 | 0.285 | 0.291 |           |       |     |                 |         |
| cg08586423 | X  | 102,508,853 | 0.000205 | 0.285 | 0.342 |           |       |     | <i>TCEAL8</i>   | Body    |
| cg18713028 | 12 | 54,329,935  | 1.91E-12 | 0.285 | 0.272 |           |       |     |                 |         |
| cg09952395 | 11 | 63,258,712  | 0.022901 | 0.285 | 0.226 |           |       |     | <i>HRASLS5</i>  | TSS200  |
| cg27454064 | 12 | 64,215,611  | 1.86E-18 | 0.285 | 0.275 |           |       |     |                 |         |
| cg09526758 | 12 | 16,758,047  | 2.41E-05 | 0.285 | 0.246 |           |       |     | <i>LMO3</i>     | 5'UTR   |
| cg14120784 | 7  | 73,867,457  | 0.002067 | 0.285 | 0.228 | 0.0000041 | 0.101 |     | <i>GTF2IRD1</i> | TSS1500 |
| cg09251292 | 6  | 117,087,056 | 6.53E-09 | 0.285 | 0.225 |           |       |     | <i>FAM162B</i>  | TSS200  |
| cg19406182 | 22 | 37,721,149  | 3.98E-05 | 0.285 | 0.185 |           |       |     |                 |         |
| cg26579556 | 14 | 103,673,450 | 5.08E-05 | 0.285 | 0.170 |           |       |     |                 |         |
| cg22030032 | 19 | 41,312,792  | 2.09E-06 | 0.285 | 0.281 |           |       |     | <i>EGLN2</i>    | Body    |

|            |    |             |          |       |       |          |       |  |                 |         |
|------------|----|-------------|----------|-------|-------|----------|-------|--|-----------------|---------|
| cg25644740 | 6  | 29,894,152  | 6.9E-07  | 0.285 | 0.278 |          |       |  | <i>HCG4P6</i>   | TSS1500 |
| cg07385423 | 1  | 161,697,574 | 5.58E-07 | 0.285 | 0.262 |          |       |  | <i>FCRLB</i>    | 3'UTR   |
| cg12536279 | 11 | 711,129     | 2.1E-19  | 0.285 | 0.270 |          |       |  | <i>EPS8L2</i>   | Body    |
| cg04135498 | 3  | 120,628,544 | 0.000334 | 0.285 | 0.239 |          |       |  | <i>STXBP5L</i>  | Body    |
| cg04812351 | 4  | 73,177,995  | 2.37E-10 | 0.285 | 0.281 |          |       |  | <i>ADAMTS3</i>  | Body    |
| cg07353303 | 5  | 145,713,747 | 9.64E-05 | 0.285 | 0.226 |          |       |  |                 |         |
| cg19391247 | 20 | 2,360,385   | 1.09E-06 | 0.285 | 0.240 |          |       |  | <i>TGM6</i>     | TSS1500 |
| cg24187351 | X  | 68,525,883  | 1.56E-05 | 0.285 | 0.318 |          |       |  |                 |         |
| cg09297903 | 8  | 42,234,798  | 1.14E-10 | 0.285 | 0.246 |          |       |  | <i>DKK4</i>     | TSS200  |
| cg19978312 | 5  | 179,634,688 | 7.76E-18 | 0.285 | 0.270 |          |       |  | <i>RASGEF1C</i> | 5'UTR   |
| cg06871999 | 7  | 104,460,407 | 3.5E-14  | 0.285 | 0.290 |          |       |  | <i>LHFPL3</i>   | Body    |
| cg14602530 | 4  | 4,859,772   | 0.004297 | 0.285 | 0.284 |          |       |  |                 |         |
| cg09275956 | 1  | 50,896,251  | 0.001623 | 0.285 | 0.295 |          |       |  |                 |         |
| cg18006568 | 2  | 71,205,891  | 0.001236 | 0.285 | 0.303 | 6.33E-25 | 0.278 |  | <i>ANKRD53</i>  | 1stExon |
| cg01468514 | 5  | 10,563,358  | 1.04E-11 | 0.285 | 0.234 |          |       |  | <i>ANKRD33B</i> | TSS1500 |
| cg25229172 | 12 | 96,336,121  | 0.003164 | 0.285 | 0.144 | 5.19E-21 | 0.171 |  | <i>AMDHD1</i>   | TSS1500 |
| cg07959771 | 7  | 121,956,740 | 0.003433 | 0.285 | 0.270 |          |       |  |                 |         |
| cg16481280 | 6  | 32,120,955  | 6.72E-05 | 0.285 | 0.308 |          |       |  | <i>PPT2</i>     | TSS1500 |
| cg16707405 | 5  | 115,152,413 | 0.004256 | 0.285 | 0.173 |          |       |  | <i>CDO1</i>     | TSS200  |
| cg11802027 | 19 | 14,049,442  | 2.75E-10 | 0.285 | 0.260 |          |       |  | <i>PODNL1</i>   | Body    |
| cg18628732 | 6  | 30,095,295  | 4.59E-13 | 0.285 | 0.268 |          |       |  |                 |         |
| cg23709913 | 2  | 132,152,429 | 7.81E-09 | 0.285 | 0.258 |          |       |  |                 |         |
| cg01297721 | 19 | 19,373,566  | 0.000189 | 0.285 | 0.291 |          |       |  | <i>HAPLN4</i>   | 5'UTR   |
| cg10165801 | 17 | 46,651,186  | 0.000622 | 0.285 | 0.233 |          |       |  | <i>HOXB3</i>    | 5'UTR   |
| cg04796181 | 6  | 27,839,850  | 0.029907 | 0.285 | 0.313 |          |       |  | <i>HIST1H3I</i> | 1stExon |
| cg01650776 | 7  | 150,748,518 | 7.57E-14 | 0.285 | 0.233 |          |       |  | <i>ACCN3</i>    | Body    |
| cg08166362 | 3  | 128,998,952 | 1.91E-14 | 0.285 | 0.244 |          |       |  | <i>C3orf37</i>  | Body    |
| cg03721195 | 5  | 137,610,448 | 0.000833 | 0.285 | 0.251 |          |       |  | <i>GFRA3</i>    | TSS200  |
| cg11059159 | 2  | 128,453,445 | 0.004385 | 0.285 | 0.205 |          |       |  |                 |         |
| cg19402991 | 2  | 164,204,915 | 1.99E-05 | 0.285 | 0.212 |          |       |  |                 |         |
| cg24660009 | 6  | 28,458,175  | 0.004029 | 0.285 | 0.271 |          |       |  |                 |         |
| cg14161412 | 1  | 76,095,838  | 0.004001 | 0.285 | 0.285 |          |       |  |                 |         |
| cg04844977 | 3  | 125,691,054 | 0.017261 | 0.285 | 0.261 |          |       |  | <i>ROPN1B</i>   | Body    |
| cg04951947 | 12 | 26,349,129  | 0.022467 | 0.285 | 0.209 |          |       |  | <i>SSPN</i>     | 5'UTR   |

|            |    |             |          |       |       |          |       |  |                 |         |
|------------|----|-------------|----------|-------|-------|----------|-------|--|-----------------|---------|
| cg06422467 | 6  | 30,720,484  | 0.000224 | 0.285 | 0.164 |          |       |  |                 |         |
| cg26654807 | 10 | 81,002,218  | 0.04006  | 0.285 | 0.172 |          |       |  | <i>ZMIZ1</i>    | Body    |
| cg10045354 | 11 | 111,169,427 | 1.62E-14 | 0.285 | 0.286 |          |       |  | <i>C11orf93</i> | TSS1500 |
| cg21590021 | 8  | 145,240,760 | 8.27E-05 | 0.285 | 0.275 |          |       |  | <i>HEATR7A</i>  | Body    |
| cg22080436 | 11 | 4,212,471   | 2.75E-07 | 0.285 | 0.259 |          |       |  |                 |         |
| cg18547299 | 19 | 14,049,578  | 1.33E-07 | 0.285 | 0.292 |          |       |  | <i>PODNL1</i>   | Body    |
| cg11903133 | 20 | 50,722,613  | 0.00682  | 0.285 | 0.313 |          |       |  | <i>ZFP64</i>    | Body    |
| cg10144198 | 10 | 134,001,728 | 2.3E-06  | 0.285 | 0.298 |          |       |  | <i>DPYSL4</i>   | Body    |
| cg14451926 | 8  | 23,562,918  | 8.08E-09 | 0.285 | 0.280 |          |       |  | <i>NKX2-6</i>   | Body    |
| cg27573591 | 7  | 127,672,152 | 0.001087 | 0.285 | 0.210 |          |       |  | <i>SND1</i>     | Body    |
| cg07578695 | 4  | 25,657,414  | 0.005768 | 0.285 | 0.160 |          |       |  | <i>SLC34A2</i>  | TSS200  |
| cg08592890 | 16 | 30,907,246  | 1.07E-07 | 0.285 | 0.261 |          |       |  | <i>CTF1</i>     | TSS1500 |
| cg07101841 | 17 | 75,315,527  | 0.044927 | 0.285 | 0.278 |          |       |  | <i>SEPT9</i>    | 5'UTR   |
| cg22210145 | 13 | 28,545,263  | 8.75E-07 | 0.285 | 0.259 |          |       |  |                 |         |
| cg19674878 | 12 | 117,470,549 | 4.31E-19 | 0.285 | 0.262 |          |       |  |                 |         |
| cg16014085 | 16 | 30,406,122  | 4.44E-05 | 0.285 | 0.196 | 1.47E-20 | 0.214 |  | <i>ZNF48</i>    | TSS1500 |
| cg18988685 | 2  | 233,368,473 | 4.14E-05 | 0.285 | 0.250 |          |       |  |                 |         |
| cg20977794 | 14 | 51,560,748  | 4.22E-06 | 0.285 | 0.223 |          |       |  | <i>TRIM9</i>    | Body    |
| cg24610231 | 15 | 29,967,620  | 8.12E-12 | 0.285 | 0.265 |          |       |  |                 |         |
| cg11548303 | 8  | 23,567,350  | 3.95E-19 | 0.285 | 0.254 |          |       |  |                 |         |
| cg13906811 | 2  | 50,575,093  | 9.97E-08 | 0.285 | 0.243 |          |       |  | <i>NRXN1</i>    | Body    |
| cg14699112 | 4  | 141,170,338 | 1.39E-07 | 0.285 | 0.249 |          |       |  |                 |         |
| cg23891273 | 12 | 102,036,400 | 5.45E-06 | 0.285 | 0.282 |          |       |  | <i>MYBPC1</i>   | Body    |
| cg07810164 | X  | 13,588,174  | 0.000137 | 0.285 | 0.292 |          |       |  | <i>EGFL6</i>    | Body    |
| cg03507241 | 18 | 12,307,649  | 3.37E-05 | 0.285 | 0.274 |          |       |  | <i>TUBB6</i>    | TSS1500 |
| cg23915769 | 5  | 115,297,488 | 0.023268 | 0.285 | 0.375 |          |       |  | <i>LVRN</i>     | TSS1500 |
| cg24332422 | 5  | 112,073,686 | 0.001066 | 0.285 | 0.156 | 1.84E-18 | 0.177 |  | <i>APC</i>      | 5'UTR   |
| cg11028769 | 6  | 25,138,951  | 0.029034 | 0.285 | 0.157 |          |       |  | <i>CMAH</i>     | TSS1500 |
| cg24760467 | 10 | 102,760,784 | 6.71E-09 | 0.285 | 0.298 |          |       |  | <i>LZTS2</i>    | 5'UTR   |
| cg04786287 | 16 | 54,970,523  | 0.003766 | 0.285 | 0.334 |          |       |  |                 |         |
| cg12821539 | 13 | 100,642,775 | 0.009419 | 0.285 | 0.306 |          |       |  |                 |         |
| cg02948476 | 14 | 95,235,026  | 0.013582 | 0.285 | 0.339 |          |       |  | <i>GSC</i>      | Body    |
| cg22502382 | 12 | 32,701,732  | 2.31E-08 | 0.285 | 0.323 |          |       |  | <i>FGD4</i>     | 5'UTR   |
| cg01966091 | 16 | 69,141,478  | 0.014603 | 0.285 | 0.270 |          |       |  | <i>HAS3</i>     | 5'UTR   |

|            |    |             |          |       |       |          |       |     |                 |         |
|------------|----|-------------|----------|-------|-------|----------|-------|-----|-----------------|---------|
| cg08398132 | 2  | 8,557,381   | 3.2E-12  | 0.285 | 0.268 |          |       |     |                 |         |
| cg26826183 | 19 | 10,231,701  | 1.6E-13  | 0.285 | 0.246 |          |       |     | <i>EIF3G</i>    | TSS1500 |
| cg20691507 | 6  | 28,956,683  | 0.000694 | 0.285 | 0.349 |          |       | Yes |                 |         |
| cg26814276 | 4  | 172,734,266 | 0.013265 | 0.285 | 0.390 |          |       |     | <i>GALNTL6</i>  | TSS1500 |
| cg16108059 | 14 | 81,421,989  | 0.004113 | 0.285 | 0.371 |          |       |     | <i>TSHR</i>     | 5'UTR   |
| cg19761272 | 14 | 76,605,176  | 0.002155 | 0.285 | 0.274 |          |       |     |                 |         |
| cg09456782 | 13 | 114,146,038 | 6.03E-06 | 0.285 | 0.208 |          |       |     | <i>TMCO3</i>    | 5'UTR   |
| cg26149275 | 2  | 176,950,007 | 0.001609 | 0.285 | 0.342 |          |       |     | <i>EVX2</i>     | TSS1500 |
| cg04064644 | 5  | 1,876,719   | 1.33E-05 | 0.285 | 0.244 |          |       |     |                 |         |
| cg04157263 | 17 | 37,752,991  | 2.81E-09 | 0.285 | 0.255 |          |       |     |                 |         |
| cg17286326 | 20 | 57,796,491  | 1.61E-07 | 0.285 | 0.269 |          |       |     | <i>ZNF831</i>   | Body    |
| cg18081863 | 19 | 50,015,527  | 2.47E-16 | 0.285 | 0.308 |          |       |     | <i>FCGRT</i>    | TSS200  |
| cg22820316 | 1  | 119,532,736 | 6.02E-07 | 0.285 | 0.303 |          |       |     | <i>TBX15</i>    | TSS1500 |
| cg17930194 | 9  | 124,982,834 | 5.33E-06 | 0.284 | 0.270 |          |       |     | <i>LHX6</i>     | Body    |
| cg02674384 | 13 | 46,425,837  | 0.004328 | 0.284 | 0.253 |          |       |     | <i>SIAH3</i>    | 5'UTR   |
| cg17683336 | 19 | 11,305,924  | 7.93E-05 | 0.284 | 0.254 |          |       |     | <i>KANK2</i>    | 5'UTR   |
| cg01970716 | 14 | 24,867,164  | 2.25E-25 | 0.284 | 0.296 |          |       |     | <i>NYNRIN</i>   | TSS1500 |
| cg25827022 | 17 | 7,287,652   | 2.21E-07 | 0.284 | 0.263 |          |       |     | <i>TNK1</i>     | Body    |
| cg19045293 | X  | 39,864,984  | 0.015033 | 0.284 | 0.322 |          |       |     |                 |         |
| cg13631916 | 6  | 117,086,931 | 0.012132 | 0.284 | 0.243 |          |       |     | <i>FAM162B</i>  | TSS200  |
| cg14272084 | 14 | 61,685,564  | 0.000527 | 0.284 | 0.202 |          |       |     |                 |         |
| cg08304190 | 20 | 26,188,997  | 0.01482  | 0.284 | 0.243 |          |       |     | <i>MIR663</i>   | TSS200  |
| cg21985590 | 6  | 84,563,910  | 1.28E-07 | 0.284 | 0.288 |          |       |     | <i>RIPPLY2</i>  | Body    |
| cg01737100 | 17 | 8,230,130   | 1.68E-06 | 0.284 | 0.263 |          |       |     |                 |         |
| cg16700924 | 1  | 146,552,102 | 0.000209 | 0.284 | 0.293 |          |       |     |                 |         |
| cg21784383 | 1  | 217,311,172 | 0.00021  | 0.284 | 0.268 |          |       |     | <i>ESRRG</i>    | TSS200  |
| cg04467162 | 3  | 128,764,824 | 0.00021  | 0.284 | 0.239 |          |       |     |                 |         |
| cg19423196 | 10 | 82,049,429  | 0.001398 | 0.284 | 0.250 | 1.22E-34 | 0.254 |     | <i>MAT1A</i>    | 1stExon |
| cg22557662 | 19 | 38,747,374  | 0.001529 | 0.284 | 0.292 |          |       |     | <i>PPP1R14A</i> | TSS1500 |
| cg15289466 | 4  | 103,740,913 | 3.65E-07 | 0.284 | 0.285 |          |       |     | <i>UBE2D3</i>   | Body    |
| cg02591487 | 12 | 8,088,741   | 4.87E-08 | 0.284 | 0.286 |          |       |     | <i>SLC2A3</i>   | 1stExon |
| cg01787574 | 12 | 16,758,057  | 1.13E-06 | 0.284 | 0.259 |          |       |     | <i>LMO3</i>     | 5'UTR   |
| cg07063068 | 14 | 91,711,033  | 2.99E-05 | 0.284 | 0.248 |          |       |     | <i>GPR68</i>    | 5'UTR   |
| cg20180061 | 3  | 181,445,385 | 0.001077 | 0.284 | 0.292 |          |       |     | <i>SOX2OT</i>   | Body    |



|            |    |             |          |       |       |          |       |  |                 |         |
|------------|----|-------------|----------|-------|-------|----------|-------|--|-----------------|---------|
| cg12526834 | 11 | 120,081,089 | 2.62E-06 | 0.284 | 0.252 |          |       |  | <i>OAF</i>      | TSS1500 |
| cg21109265 | 6  | 43,276,647  | 0.030047 | 0.284 | 0.205 |          |       |  | <i>CRIP3</i>    | TSS200  |
| cg17590101 | X  | 48,327,749  | 3.22E-09 | 0.284 | 0.275 |          |       |  | <i>SLC38A5</i>  | 5'UTR   |
| cg25530583 | 18 | 43,305,617  | 1.59E-07 | 0.284 | 0.258 |          |       |  | <i>SLC14A1</i>  | 5'UTR   |
| cg02530022 | 7  | 96,642,708  | 2.85E-07 | 0.284 | 0.291 |          |       |  | <i>DLX6AS</i>   | Body    |
| cg09235983 | 11 | 58,612,814  | 0.002694 | 0.284 | 0.279 |          |       |  | <i>GLYATL2</i>  | TSS1500 |
| cg01179012 | 2  | 131,595,107 | 1.74E-07 | 0.284 | 0.273 |          |       |  |                 |         |
| cg13726459 | 12 | 54,409,657  | 4.49E-05 | 0.284 | 0.218 |          |       |  | <i>HOXC4</i>    | TSS1500 |
| cg15132165 | 17 | 773,137     | 5.51E-06 | 0.284 | 0.278 |          |       |  | <i>NXN</i>      | Body    |
| cg09896120 | 11 | 46,317,577  | 0.00024  | 0.284 | 0.208 |          |       |  | <i>CREB3L1</i>  | Body    |
| cg16191307 | 12 | 63,754,169  | 4.88E-06 | 0.284 | 0.199 |          |       |  |                 |         |
| cg00832555 | 3  | 169,529,716 | 0.000852 | 0.284 | 0.209 |          |       |  | <i>LRRC34</i>   | Body    |
| cg27057027 | 7  | 27,243,276  | 0.018015 | 0.284 | 0.365 |          |       |  |                 |         |
| cg15718581 | 4  | 188,916,581 | 0.015413 | 0.284 | 0.283 |          |       |  | <i>ZFP42</i>    | TSS1500 |
| cg23704195 | 17 | 59,531,104  | 6.21E-12 | 0.284 | 0.264 |          |       |  |                 |         |
| cg17113856 | 6  | 32,120,895  | 6.57E-10 | 0.284 | 0.284 |          |       |  | <i>PPT2</i>     | TSS1500 |
| cg19309580 | 1  | 9,747,263   | 0.049545 | 0.284 | 0.275 |          |       |  | <i>PIK3CD</i>   | 5'UTR   |
| cg08767820 | 7  | 51,539,583  | 2.06E-06 | 0.284 | 0.266 |          |       |  |                 |         |
| cg16510793 | 9  | 116,450,346 | 1.33E-06 | 0.284 | 0.272 |          |       |  |                 |         |
| cg17119387 | 17 | 2,615,431   | 0.003788 | 0.284 | 0.207 | 1.61E-22 | 0.177 |  | <i>KIAA0664</i> | TSS1500 |
| cg25950112 | 5  | 170,740,870 | 0.022621 | 0.284 | 0.300 |          |       |  |                 |         |
| cg25991569 | 13 | 35,324,682  | 0.000603 | 0.284 | 0.299 |          |       |  |                 |         |
| cg10684686 | 6  | 28,557,047  | 0.002567 | 0.284 | 0.229 |          |       |  |                 |         |
| cg13321661 | 1  | 62,319,602  | 2.05E-08 | 0.284 | 0.266 |          |       |  | <i>INADL</i>    | Body    |
| cg03200166 | 11 | 61,335,254  | 0.008697 | 0.284 | 0.143 |          |       |  | <i>SYT7</i>     | Body    |
| cg08515442 | 6  | 168,778,225 | 6.11E-12 | 0.284 | 0.252 |          |       |  |                 |         |
| cg04442631 | 22 | 36,593,144  | 1.21E-11 | 0.284 | 0.268 |          |       |  | <i>APOL4</i>    | Body    |
| cg06197966 | 10 | 29,948,324  | 1.05E-08 | 0.284 | 0.242 |          |       |  | <i>SVIL</i>     | 5'UTR   |
| cg22252475 | X  | 134,654,383 | 0.006261 | 0.284 | 0.157 |          |       |  | <i>DDX26B</i>   | TSS200  |
| cg00739120 | 19 | 36,035,875  | 0.000542 | 0.284 | 0.151 | 1.03E-25 | 0.214 |  | <i>GAPDHS</i>   | Body    |
| cg05534148 | 7  | 1,398,159   | 0.000437 | 0.284 | 0.316 |          |       |  |                 |         |
| cg18147605 | 12 | 6,663,049   | 4.28E-10 | 0.284 | 0.293 |          |       |  | <i>IFFO1</i>    | Body    |
| cg19695266 | 1  | 1,241,672   | 2.07E-18 | 0.284 | 0.307 |          |       |  | <i>ACAP3</i>    | Body    |
| cg14629509 | 7  | 134,143,991 | 0.001104 | 0.284 | 0.176 |          |       |  | <i>AKR1B1</i>   | TSS200  |

|            |    |             |          |       |       |          |       |  |                 |         |
|------------|----|-------------|----------|-------|-------|----------|-------|--|-----------------|---------|
| cg16832407 | 9  | 73,736,539  | 3.89E-05 | 0.284 | 0.262 | 1.29E-17 | 0.197 |  | <i>TRPM3</i>    | TSS200  |
| cg02463253 | 17 | 27,369,851  | 6.27E-08 | 0.284 | 0.287 |          |       |  | <i>PIPOX</i>    | TSS200  |
| cg24553170 | 1  | 49,243,472  | 3.36E-16 | 0.284 | 0.263 |          |       |  | <i>AGBL4</i>    | Body    |
| cg11649981 | 5  | 174,178,104 | 0.019112 | 0.284 | 0.225 |          |       |  |                 |         |
| cg19350020 | 11 | 118,489,198 | 1.25E-18 | 0.284 | 0.278 |          |       |  | <i>PHLDB1</i>   | Body    |
| cg22215815 | 12 | 57,619,178  | 1.19E-06 | 0.284 | 0.294 |          |       |  | <i>NXPH4</i>    | Body    |
| cg09671258 | 1  | 180,202,530 | 0.029105 | 0.284 | 0.315 |          |       |  | <i>LHX4</i>     | Body    |
| cg02336762 | 12 | 118,313,990 | 0.000774 | 0.284 | 0.322 |          |       |  | <i>KSR2</i>     | Body    |
| cg08198176 | 3  | 37,494,602  | 3.26E-11 | 0.284 | 0.274 |          |       |  | <i>ITGA9</i>    | Body    |
| cg00101715 | 3  | 101,497,475 | 1.99E-05 | 0.284 | 0.203 |          |       |  | <i>FAM55C</i>   | TSS1500 |
| cg02745847 | 17 | 47,075,880  | 8.64E-06 | 0.284 | 0.253 |          |       |  | <i>IGF2BP1</i>  | Body    |
| cg13023870 | 14 | 37,124,018  | 8.28E-06 | 0.284 | 0.300 |          |       |  |                 |         |
| cg16546503 | 18 | 12,307,329  | 6.94E-05 | 0.284 | 0.276 |          |       |  | <i>TUBB6</i>    | TSS1500 |
| cg18196782 | 1  | 232,941,176 | 0.016495 | 0.284 | 0.243 |          |       |  | <i>KIAA1383</i> | 1stExon |
| cg14298457 | 2  | 177,012,117 | 4.58E-08 | 0.284 | 0.219 |          |       |  |                 |         |
| cg07860213 | 8  | 70,982,039  | 0.000521 | 0.284 | 0.294 |          |       |  | <i>PRDM14</i>   | Body    |
| cg20247486 | 1  | 119,544,329 | 6.49E-08 | 0.284 | 0.248 |          |       |  |                 |         |
| cg18255595 | 13 | 20,735,871  | 2.21E-06 | 0.284 | 0.265 |          |       |  | <i>GJA3</i>     | TSS1500 |
| cg22610620 | 10 | 77,524,487  | 3.03E-08 | 0.284 | 0.260 |          |       |  |                 |         |
| cg01355242 | X  | 56,258,387  | 7.68E-13 | 0.284 | 0.250 |          |       |  | <i>KLF8</i>     | TSS1500 |
| cg07393734 | 11 | 44,341,451  | 0.002317 | 0.284 | 0.281 |          |       |  |                 |         |
| cg25527090 | 10 | 118,894,180 | 0.000132 | 0.284 | 0.221 |          |       |  | <i>VAX1</i>     | Body    |
| cg01154046 | 10 | 17,270,601  | 0.030807 | 0.284 | 0.339 |          |       |  | <i>VIM</i>      | 5'UTR   |
| cg08814148 | X  | 118,407,645 | 0.001244 | 0.284 | 0.246 |          |       |  |                 |         |
| cg24404823 | 1  | 247,496,053 | 0.029953 | 0.284 | 0.149 |          |       |  | <i>ZNF496</i>   | TSS1500 |
| cg04455137 | 7  | 120,629,316 | 1.54E-07 | 0.284 | 0.256 |          |       |  | <i>C7orf58</i>  | 5'UTR   |
| cg18125573 | 17 | 38,506,350  | 0.009714 | 0.284 | 0.227 |          |       |  | <i>RARA</i>     | Body    |
| cg19883813 | 10 | 8,098,005   | 2.88E-08 | 0.284 | 0.227 |          |       |  | <i>GATA3</i>    | Body    |
| cg04098194 | 1  | 1,241,087   | 6.15E-14 | 0.284 | 0.303 |          |       |  | <i>ACAP3</i>    | Body    |
| cg07598755 | 16 | 30,023,028  | 0.000676 | 0.283 | 0.212 |          |       |  | <i>DOC2A</i>    | TSS1500 |
| cg17110920 | 1  | 27,893,925  | 3.81E-18 | 0.283 | 0.275 |          |       |  | <i>AHDC1</i>    | 5'UTR   |
| cg00469207 | 7  | 152,622,455 | 0.012065 | 0.283 | 0.390 |          |       |  |                 |         |
| cg22250498 | 11 | 63,258,744  | 0.023206 | 0.283 | 0.251 |          |       |  | <i>HRASLS5</i>  | TSS200  |
| cg01162672 | 6  | 133,562,275 | 6.52E-08 | 0.283 | 0.313 |          |       |  | <i>EYA4</i>     | TSS1500 |

|            |    |             |          |       |       |           |       |  |                  |         |
|------------|----|-------------|----------|-------|-------|-----------|-------|--|------------------|---------|
| cg14071579 | 9  | 126,794,830 | 0.000458 | 0.283 | 0.382 |           |       |  | <i>LHX2</i>      | Body    |
| cg26065488 | 3  | 171,176,016 | 4.71E-08 | 0.283 | 0.288 |           |       |  | <i>TNIK</i>      | Body    |
| cg07962303 | 19 | 11,253,944  | 0.000465 | 0.283 | 0.211 |           |       |  |                  |         |
| cg18734330 | 14 | 95,876,455  | 4.44E-13 | 0.283 | 0.280 |           |       |  | <i>C14orf139</i> | TSS200  |
| cg04660410 | 3  | 38,036,034  | 0.018952 | 0.283 | 0.111 | 0.0000212 | 0.121 |  | <i>VILL</i>      | Body    |
| cg17208748 | 3  | 197,194,394 | 1.25E-10 | 0.283 | 0.291 |           |       |  |                  |         |
| cg00278392 | 6  | 16,802,505  | 4.94E-11 | 0.283 | 0.257 |           |       |  |                  |         |
| cg07011913 | 2  | 177,014,626 | 5.34E-08 | 0.283 | 0.258 |           |       |  | <i>HOXD4</i>     | TSS1500 |
| cg04193484 | 12 | 57,620,856  | 3.37E-06 | 0.283 | 0.306 |           |       |  |                  |         |
| cg27175634 | 1  | 77,748,728  | 0.024566 | 0.283 | 0.075 |           |       |  | <i>AK5</i>       | Body    |
| cg18356276 | 7  | 17,337,342  | 7.29E-40 | 0.283 | 0.269 |           |       |  | <i>AHR</i>       | TSS1500 |
| cg07862488 | 14 | 60,977,054  | 6.41E-07 | 0.283 | 0.251 |           |       |  | <i>SIX6</i>      | Body    |
| cg24784350 | 21 | 47,518,998  | 0.00131  | 0.283 | 0.185 |           |       |  | <i>COL6A2</i>    | 5'UTR   |
| cg00185066 | 13 | 80,910,763  | 1.95E-06 | 0.283 | 0.290 |           |       |  | <i>SPRY2</i>     | 3'UTR   |
| cg16331883 | 12 | 53,886,170  | 4.14E-07 | 0.283 | 0.250 |           |       |  | <i>MAP3K12</i>   | 5'UTR   |
| cg07083464 | 7  | 27,240,758  | 0.034813 | 0.283 | 0.348 |           |       |  | <i>HOXA13</i>    | TSS1500 |
| cg06470822 | 6  | 28,175,283  | 3.82E-05 | 0.283 | 0.251 |           |       |  |                  |         |
| cg22757019 | 7  | 91,808,805  | 1.9E-06  | 0.283 | 0.221 |           |       |  |                  |         |
| cg12980127 | 5  | 2,129,874   | 0.024469 | 0.283 | 0.380 |           |       |  |                  |         |
| cg09941363 | 1  | 51,730,449  | 5.16E-07 | 0.283 | 0.268 |           |       |  | <i>RNF11</i>     | Body    |
| cg12417775 | 1  | 212,463,238 | 2.32E-23 | 0.283 | 0.295 |           |       |  | <i>PPP2R5A</i>   | Body    |
| cg20980055 | 6  | 133,562,258 | 0.001401 | 0.283 | 0.334 |           |       |  | <i>EYA4</i>      | TSS1500 |
| cg14059835 | 9  | 132,598,917 | 1.58E-07 | 0.283 | 0.257 |           |       |  | <i>C9orf78</i>   | TSS1500 |
| cg09041207 | 16 | 87,417,818  | 0.012058 | 0.283 | 0.215 |           |       |  | <i>FBXO31</i>    | TSS1500 |
| cg11274314 | 2  | 242,480,504 | 3.53E-07 | 0.283 | 0.280 |           |       |  |                  |         |
| cg27548752 | 19 | 47,263,614  | 4.61E-18 | 0.283 | 0.277 |           |       |  |                  |         |
| cg02628823 | 4  | 141,419,587 | 0.000128 | 0.283 | 0.277 |           |       |  |                  |         |
| cg25417335 | 17 | 15,313,159  | 3.56E-23 | 0.283 | 0.300 |           |       |  |                  |         |
| cg23799901 | 7  | 124,404,431 | 0.000178 | 0.283 | 0.186 |           |       |  | <i>GPR37</i>     | 1stExon |
| cg00651400 | 6  | 3,230,007   | 1.07E-08 | 0.283 | 0.260 |           |       |  |                  |         |
| cg11139090 | 5  | 176,294,068 | 2.6E-06  | 0.283 | 0.270 |           |       |  | <i>UNC5A</i>     | Body    |
| cg01817521 | 20 | 61,584,108  | 1.74E-08 | 0.283 | 0.265 |           |       |  | <i>SLC17A9</i>   | 1stExon |
| cg00952054 | 1  | 9,437,047   | 1.58E-10 | 0.283 | 0.300 |           |       |  |                  |         |
| cg06640593 | 2  | 568,321     | 1.23E-09 | 0.283 | 0.239 |           |       |  |                  |         |

|            |    |             |          |       |       |          |       |  |                  |         |
|------------|----|-------------|----------|-------|-------|----------|-------|--|------------------|---------|
| cg20770175 | 2  | 189,839,474 | 9.27E-09 | 0.283 | 0.306 | 2.28E-08 | 0.164 |  | <i>COL3A1</i>    | Body    |
| cg10112943 | 4  | 148,401,351 | 1.16E-12 | 0.283 | 0.278 |          |       |  | <i>EDNRA</i>     | TSS1500 |
| cg21146537 | 22 | 35,695,301  | 6.6E-08  | 0.283 | 0.181 |          |       |  | <i>TOM1</i>      | TSS1500 |
| cg25900280 | 17 | 59,534,847  | 7.84E-08 | 0.283 | 0.249 |          |       |  | <i>TBX4</i>      | Body    |
| cg14367995 | 9  | 110,253,800 | 5.02E-06 | 0.283 | 0.273 |          |       |  |                  |         |
| cg04293930 | 6  | 35,465,845  | 0.000161 | 0.283 | 0.200 |          |       |  | <i>TULP1</i>     | 3'UTR   |
| cg02959609 | 1  | 151,693,503 | 2.47E-08 | 0.283 | 0.251 |          |       |  | <i>C1orf230</i>  | TSS1500 |
| cg06846752 | 1  | 32,929,715  | 8.45E-05 | 0.283 | 0.220 |          |       |  | <i>ZBTB8B</i>    | TSS1500 |
| cg18075315 | 12 | 106,988,393 | 2.31E-09 | 0.283 | 0.289 |          |       |  | <i>RFX4</i>      | Body    |
| cg20772590 | 17 | 75,446,431  | 3.46E-05 | 0.283 | 0.179 |          |       |  | <i>SEPT9</i>     | TSS200  |
| cg14258853 | 12 | 29,935,411  | 0.000467 | 0.283 | 0.208 |          |       |  | <i>TMTC1</i>     | 5'UTR   |
| cg18009621 | 11 | 114,129,200 | 1.21E-11 | 0.283 | 0.338 |          |       |  |                  |         |
| cg02909688 | 1  | 147,752,823 | 0.001368 | 0.283 | 0.266 |          |       |  |                  |         |
| cg19776515 | 8  | 57,232,395  | 0.00957  | 0.283 | 0.367 |          |       |  | <i>SDR16C5</i>   | 5'UTR   |
| cg10149836 | 17 | 29,719,312  | 1.11E-09 | 0.283 | 0.204 | 2.5E-17  | 0.177 |  | <i>RAB11FIP4</i> | Body    |
| cg20016673 | 1  | 108,023,366 | 3.62E-09 | 0.283 | 0.252 |          |       |  | <i>NTNG1</i>     | Body    |
| cg02249292 | 10 | 28,035,655  | 4.96E-09 | 0.283 | 0.284 |          |       |  | <i>MKX</i>       | TSS1500 |
| cg02580923 | 12 | 117,470,541 | 2.13E-18 | 0.283 | 0.247 |          |       |  |                  |         |
| cg18878437 | 17 | 7,826,413   | 0.002022 | 0.283 | 0.285 |          |       |  | <i>KCNAB3</i>    | 3'UTR   |
| cg26327071 | 17 | 46,655,818  | 0.023765 | 0.283 | 0.303 |          |       |  | <i>HOXB4</i>     | TSS200  |
| cg27189803 | 10 | 80,416,566  | 4.59E-13 | 0.283 | 0.267 |          |       |  |                  |         |
| cg14435807 | 15 | 74,218,780  | 1.91E-17 | 0.283 | 0.262 | 2.01E-21 | 0.191 |  | <i>LOXL1</i>     | TSS200  |
| cg22884020 | 3  | 38,081,186  | 4.29E-05 | 0.283 | 0.182 |          |       |  | <i>DLEC1</i>     | Body    |
| cg24410453 | 6  | 53,919,041  | 0.004069 | 0.283 | 0.366 |          |       |  | <i>C6orf142</i>  | Body    |
| cg19792599 | 11 | 125,774,406 | 1.58E-06 | 0.283 | 0.240 |          |       |  | <i>DDX25</i>     | 5'UTR   |
| cg05348973 | 1  | 110,697,298 | 0.001415 | 0.283 | 0.287 |          |       |  | <i>SLC6A17</i>   | 5'UTR   |
| cg13475665 | 3  | 65,582,925  | 9.61E-07 | 0.283 | 0.292 |          |       |  | <i>MAGI1</i>     | Body    |
| cg07471461 | 6  | 37,751,706  | 0.036129 | 0.283 | 0.189 |          |       |  |                  |         |
| cg04184143 | 5  | 50,263,500  | 0.008497 | 0.283 | 0.275 |          |       |  |                  |         |
| cg16712127 | X  | 119,149,186 | 0.00119  | 0.283 | 0.229 |          |       |  |                  |         |
| cg14571710 | 6  | 30,655,896  | 8.48E-23 | 0.283 | 0.270 |          |       |  | <i>KIAA1949</i>  | TSS1500 |
| cg15392819 | 1  | 180,585,679 | 1.89E-19 | 0.283 | 0.265 |          |       |  |                  |         |
| cg00777121 | 3  | 50,378,191  | 6.95E-06 | 0.283 | 0.283 | 3.55E-10 | 0.144 |  | <i>RASSF1</i>    | 1stExon |
| cg03671052 | 5  | 180,086,260 | 0.001916 | 0.283 | 0.320 |          |       |  |                  |         |

|            |    |             |          |       |       |  |  |  |                  |         |
|------------|----|-------------|----------|-------|-------|--|--|--|------------------|---------|
| cg06844012 | 3  | 159,944,430 | 4.11E-05 | 0.283 | 0.162 |  |  |  | <i>LOC401097</i> | 3'UTR   |
| cg07544796 | 6  | 36,817,048  | 0.032222 | 0.283 | 0.094 |  |  |  |                  |         |
| cg10786645 | 19 | 36,352,376  | 0.001979 | 0.283 | 0.304 |  |  |  | <i>KIRREL2</i>   | Body    |
| cg27078824 | 6  | 44,187,399  | 0.029133 | 0.283 | 0.197 |  |  |  | <i>SLC29A1</i>   | 1stExon |
| cg15651928 | 20 | 32,290,811  | 4.72E-07 | 0.283 | 0.256 |  |  |  | <i>PXMP4</i>     | 3'UTR   |
| cg18295744 | 10 | 80,872,926  | 1.52E-15 | 0.283 | 0.256 |  |  |  | <i>ZMIZ1</i>     | 5'UTR   |
| cg16716883 | 10 | 74,079,772  | 0.018484 | 0.283 | 0.194 |  |  |  |                  |         |
| cg14482998 | 6  | 111,984,370 | 1.38E-11 | 0.283 | 0.249 |  |  |  | <i>FYN</i>       | Body    |
| cg22152728 | 11 | 20,185,382  | 0.019989 | 0.283 | 0.337 |  |  |  |                  |         |
| cg24319381 | 15 | 83,316,911  | 0.000803 | 0.283 | 0.255 |  |  |  | <i>CPEB1</i>     | TSS200  |
| cg25649765 | 2  | 11,672,761  | 1.81E-13 | 0.283 | 0.267 |  |  |  | <i>GREB1</i>     | TSS1500 |
| cg07505018 | 16 | 54,968,831  | 0.00468  | 0.283 | 0.354 |  |  |  |                  |         |
| cg13215970 | 4  | 74,864,596  | 1.96E-05 | 0.283 | 0.226 |  |  |  | <i>CXCL5</i>     | TSS200  |
| cg15571561 | 3  | 35,706,161  | 0.001132 | 0.283 | 0.278 |  |  |  | <i>ARPP-21</i>   | 5'UTR   |
| cg26708220 | 15 | 37,387,577  | 0.028095 | 0.283 | 0.378 |  |  |  | <i>MEIS2</i>     | Body    |
| cg20633818 | 6  | 27,799,380  | 0.003907 | 0.283 | 0.224 |  |  |  | <i>HIST1H4K</i>  | TSS200  |
| cg16582517 | 3  | 5,025,885   | 0.001135 | 0.283 | 0.129 |  |  |  | <i>BHLHE40</i>   | 3'UTR   |
| cg18729001 | 12 | 45,443,808  | 4.26E-38 | 0.282 | 0.277 |  |  |  | <i>DBX2</i>      | Body    |
| cg21582112 | 12 | 54,421,335  | 1.39E-07 | 0.282 | 0.223 |  |  |  | <i>HOXC4</i>     | 5'UTR   |
| cg27645968 | 19 | 406,407     | 4.32E-15 | 0.282 | 0.273 |  |  |  | <i>C2CD4C</i>    | 3'UTR   |
| cg25529393 | 6  | 27,858,380  | 1.01E-05 | 0.282 | 0.284 |  |  |  | <i>HIST1H3J</i>  | 1stExon |
| cg21683708 | 6  | 36,628,755  | 0.003504 | 0.282 | 0.228 |  |  |  |                  |         |
| cg03355101 | 19 | 16,449,718  | 1.77E-06 | 0.282 | 0.285 |  |  |  |                  |         |
| cg11085282 | 22 | 46,262,203  | 0.00229  | 0.282 | 0.318 |  |  |  |                  |         |
| cg00308438 | 1  | 92,329,399  | 6.21E-09 | 0.282 | 0.292 |  |  |  | <i>TGFBR3</i>    | 5'UTR   |
| cg00437102 | 2  | 10,231,846  | 2.17E-07 | 0.282 | 0.265 |  |  |  |                  |         |
| cg27649971 | 11 | 711,205     | 2.62E-17 | 0.282 | 0.276 |  |  |  | <i>EPS8L2</i>    | Body    |
| cg09488203 | 10 | 95,327,884  | 1.71E-05 | 0.282 | 0.305 |  |  |  | <i>GPR120</i>    | Body    |
| cg06811094 | 1  | 200,272,112 | 1.55E-07 | 0.282 | 0.268 |  |  |  |                  |         |
| cg21370856 | 16 | 23,848,003  | 3.17E-06 | 0.282 | 0.238 |  |  |  | <i>PRKCB</i>     | Body    |
| cg04829485 | 14 | 104,550,970 | 1.5E-10  | 0.282 | 0.263 |  |  |  | <i>ASPG</i>      | TSS1500 |
| cg09427311 | 9  | 129,885,730 | 7.61E-05 | 0.282 | 0.232 |  |  |  | <i>ANGPTL2</i>   | TSS1500 |
| cg11225297 | 3  | 130,064,318 | 0.001304 | 0.282 | 0.200 |  |  |  | <i>COL29A1</i>   | TSS200  |
| cg17229678 | 6  | 32,121,555  | 4.38E-08 | 0.282 | 0.249 |  |  |  | <i>PPT2</i>      | Body    |

|            |    |             |          |       |       |          |       |  |                 |         |
|------------|----|-------------|----------|-------|-------|----------|-------|--|-----------------|---------|
| cg22867719 | 1  | 19,276,236  | 7.51E-14 | 0.282 | 0.265 |          |       |  | <i>IFFO2</i>    | Body    |
| cg15878619 | 6  | 30,687,373  | 4.42E-08 | 0.282 | 0.248 |          |       |  | <i>TUBB</i>     | TSS1500 |
| cg17567700 | 22 | 51,112,218  | 3.83E-05 | 0.282 | 0.293 |          |       |  | <i>SHANK3</i>   | TSS1500 |
| cg04652097 | 7  | 79,083,445  | 0.012438 | 0.282 | 0.195 |          |       |  | <i>MAGI2</i>    | TSS1500 |
| cg27114640 | 1  | 18,437,320  | 9.61E-05 | 0.282 | 0.247 |          |       |  | <i>IGSF21</i>   | Body    |
| cg09209510 | 14 | 100,288,389 | 8.51E-14 | 0.282 | 0.256 |          |       |  | <i>EML1</i>     | Body    |
| cg07788369 | 7  | 96,619,068  | 1.64E-07 | 0.282 | 0.269 |          |       |  | <i>DLX6AS</i>   | Body    |
| cg14550985 | 11 | 66,104,159  | 5.98E-13 | 0.282 | 0.293 |          |       |  | <i>RIN1</i>     | TSS200  |
| cg22534145 | 20 | 23,015,936  | 0.000687 | 0.282 | 0.202 |          |       |  | <i>SSTR4</i>    | TSS200  |
| cg02590886 | 7  | 87,848,358  | 0.005687 | 0.282 | 0.193 |          |       |  | <i>SRI</i>      | Body    |
| cg03107888 | 7  | 27,241,203  | 0.019201 | 0.282 | 0.326 |          |       |  | <i>HOXA13</i>   | TSS1500 |
| cg16608018 | 10 | 122,739,544 | 2.87E-12 | 0.282 | 0.231 |          |       |  |                 |         |
| cg27296341 | 6  | 154,485,839 | 2.09E-19 | 0.282 | 0.295 |          |       |  | <i>IPCEF1</i>   | Body    |
| cg17456100 | 1  | 22,140,859  | 5.72E-10 | 0.282 | 0.222 |          |       |  | <i>LDLRAD2</i>  | Body    |
| cg00970325 | 3  | 142,683,176 | 0.007227 | 0.282 | 0.299 | 3.25E-09 | 0.217 |  | <i>PAQR9</i>    | TSS1500 |
| cg00694258 | 10 | 32,038,939  | 1.47E-08 | 0.282 | 0.264 |          |       |  |                 |         |
| cg15741433 | 6  | 26,018,084  | 0.000344 | 0.282 | 0.241 |          |       |  | <i>HIST1H1A</i> | TSS200  |
| cg11197916 | 1  | 26,249,040  | 1.72E-06 | 0.282 | 0.161 |          |       |  |                 |         |
| cg00118808 | 9  | 132,097,931 | 2.67E-05 | 0.282 | 0.231 |          |       |  |                 |         |
| cg17380661 | 6  | 100,912,946 | 0.010384 | 0.282 | 0.371 |          |       |  | <i>SIM1</i>     | TSS1500 |
| cg01460276 | 8  | 18,871,817  | 0.007629 | 0.282 | 0.187 |          |       |  | <i>PSD3</i>     | TSS1500 |
| cg24803719 | 17 | 45,855,879  | 2.64E-05 | 0.282 | 0.218 |          |       |  |                 |         |
| cg25777540 | X  | 101,906,428 | 0.015051 | 0.282 | 0.297 |          |       |  | <i>GPRASP1</i>  | 1stExon |
| cg26162932 | 4  | 81,106,342  | 0.013393 | 0.282 | 0.368 |          |       |  | <i>PRDM8</i>    | TSS200  |
| cg23090632 | 8  | 94,712,373  | 0.007196 | 0.282 | 0.161 |          |       |  | <i>FAM92A1</i>  | TSS1500 |
| cg02431672 | 1  | 43,534,324  | 0.001353 | 0.282 | 0.100 |          |       |  |                 |         |
| cg16584431 | X  | 117,250,153 | 1.21E-07 | 0.282 | 0.248 |          |       |  | <i>KLHL13</i>   | 5'UTR   |
| cg19268434 | 6  | 32,076,967  | 6.59E-05 | 0.282 | 0.270 |          |       |  | <i>TNXB</i>     | 5'UTR   |
| cg22682811 | 20 | 21,372,462  | 7E-12    | 0.282 | 0.292 |          |       |  |                 |         |
| cg10022722 | 16 | 2,041,826   | 5.45E-05 | 0.282 | 0.235 |          |       |  | <i>SYNGR3</i>   | Body    |
| cg18556834 | 14 | 24,641,070  | 2.41E-11 | 0.282 | 0.282 |          |       |  | <i>REC8</i>     | TSS200  |
| cg03966514 | 13 | 36,919,738  | 0.011467 | 0.282 | 0.303 |          |       |  | <i>SPG20</i>    | 5'UTR   |
| cg19248676 | 12 | 115,135,926 | 2.7E-10  | 0.282 | 0.250 |          |       |  |                 |         |
| cg24761507 | 17 | 35,293,930  | 0.045625 | 0.282 | 0.171 |          |       |  | <i>LHX1</i>     | TSS1500 |

|            |    |             |          |       |       |          |       |  |                |         |
|------------|----|-------------|----------|-------|-------|----------|-------|--|----------------|---------|
| cg03599147 | 11 | 78,551,798  | 9.58E-12 | 0.282 | 0.289 |          |       |  | <i>ODZ4</i>    | Body    |
| cg04804717 | 7  | 1,300,320   | 0.008319 | 0.282 | 0.281 |          |       |  |                |         |
| cg07341624 | 20 | 2,539,167   | 6.33E-05 | 0.282 | 0.278 |          |       |  | <i>TMC2</i>    | Body    |
| cg23760687 | 13 | 25,621,735  | 0.008174 | 0.282 | 0.145 |          |       |  |                |         |
| cg19796981 | 22 | 50,438,501  | 3.9E-07  | 0.282 | 0.277 |          |       |  | <i>IL17REL</i> | Body    |
| cg24054180 | 11 | 112,157,241 | 1.49E-21 | 0.282 | 0.286 |          |       |  |                |         |
| cg26724975 | 12 | 46,554,412  | 2.31E-38 | 0.282 | 0.263 |          |       |  |                |         |
| cg19045239 | 19 | 46,799,505  | 7.4E-10  | 0.282 | 0.254 |          |       |  | <i>HIF3A</i>   | TSS1500 |
| cg21229055 | X  | 13,957,233  | 1.07E-07 | 0.282 | 0.260 |          |       |  | <i>GPM6B</i>   | TSS1500 |
| cg12073779 | 2  | 208,989,469 | 6.12E-09 | 0.282 | 0.287 | 1.28E-13 | 0.196 |  | <i>CRYGD</i>   | TSS200  |
| cg13922291 | 1  | 46,914,528  | 6.31E-09 | 0.282 | 0.275 |          |       |  |                |         |
| cg17155018 | 6  | 111,953,066 | 1.46E-25 | 0.282 | 0.267 |          |       |  |                |         |
| cg04774469 | 14 | 21,562,632  | 3.78E-14 | 0.282 | 0.292 |          |       |  | <i>ZNF219</i>  | 5'UTR   |
| cg16572876 | 4  | 56,024,045  | 6.86E-06 | 0.282 | 0.287 |          |       |  |                |         |
| cg10562586 | 2  | 210,444,154 | 3.19E-07 | 0.282 | 0.283 | 1.1E-08  | 0.102 |  | <i>MAP2</i>    | TSS1500 |
| cg06509837 | 19 | 610,955     | 4.52E-05 | 0.282 | 0.207 |          |       |  | <i>HCN2</i>    | Body    |
| cg10625533 | 2  | 233,498,682 | 1.56E-07 | 0.282 | 0.251 |          |       |  | <i>EFHD1</i>   | 1stExon |
| cg18021286 | 11 | 115,530,371 | 3.08E-06 | 0.282 | 0.229 |          |       |  |                |         |
| cg13482308 | 9  | 37,002,685  | 0.000442 | 0.282 | 0.253 |          |       |  | <i>PAX5</i>    | Body    |
| cg15373592 | 6  | 56,405,167  | 0.001429 | 0.282 | 0.224 |          |       |  | <i>DST</i>     | Body    |
| cg21757872 | 12 | 107,974,453 | 4.07E-14 | 0.282 | 0.279 |          |       |  | <i>BTBD11</i>  | TSS200  |
| cg06593753 | 7  | 51,539,323  | 1.56E-11 | 0.282 | 0.284 |          |       |  |                |         |
| cg18184071 | 1  | 149,670,096 | 1.21E-23 | 0.282 | 0.291 |          |       |  |                |         |
| cg19352038 | 2  | 223,164,869 | 1.48E-07 | 0.282 | 0.296 | 1.78E-16 | 0.189 |  | <i>PAX3</i>    | TSS1500 |
| cg23970275 | 2  | 208,008,052 | 1.46E-09 | 0.282 | 0.293 |          |       |  | <i>KLF7</i>    | Body    |
| cg15573040 | 15 | 92,938,295  | 0.012179 | 0.282 | 0.219 |          |       |  | <i>ST8SIA2</i> | Body    |
| cg02701825 | 17 | 73,083,632  | 9.07E-12 | 0.282 | 0.223 |          |       |  | <i>SLC16A5</i> | TSS1500 |
| cg13920090 | 1  | 27,872,303  | 3.04E-12 | 0.282 | 0.296 |          |       |  | <i>AHDC1</i>   | 3'UTR   |
| cg25007447 | 12 | 93,521,330  | 2.6E-16  | 0.282 | 0.271 |          |       |  |                |         |
| cg10233654 | 12 | 89,744,621  | 1.09E-11 | 0.282 | 0.261 |          |       |  | <i>DUSP6</i>   | Body    |
| cg15922057 | 17 | 25,784,714  | 2E-07    | 0.282 | 0.348 |          |       |  |                |         |
| cg22488256 | 1  | 66,258,046  | 0.00013  | 0.282 | 0.278 |          |       |  | <i>PDE4B</i>   | TSS200  |
| cg16053580 | 19 | 51,568,863  | 1.4E-07  | 0.282 | 0.274 |          |       |  | <i>KLK13</i>   | TSS1500 |
| cg08873266 | 1  | 40,255,052  | 0.000565 | 0.282 | 0.147 |          |       |  | <i>BMP8B</i>   | TSS1500 |

|            |    |             |          |       |       |          |       |  |                 |         |
|------------|----|-------------|----------|-------|-------|----------|-------|--|-----------------|---------|
| cg10206344 | 16 | 31,483,277  | 0.001071 | 0.282 | 0.125 |          |       |  | <i>TGFB111</i>  | TSS1500 |
| cg12645616 | 10 | 103,070,480 | 0.0006   | 0.282 | 0.256 |          |       |  |                 |         |
| cg21543859 | 6  | 45,391,645  | 0.003796 | 0.282 | 0.201 |          |       |  | <i>RUNX2</i>    | Body    |
| cg10402698 | 15 | 67,000,045  | 9.69E-08 | 0.281 | 0.312 |          |       |  | <i>SMAD6</i>    | TSS1500 |
| cg00108715 | 3  | 52,565,015  | 1.09E-21 | 0.281 | 0.257 |          |       |  | <i>NT5DC2</i>   | Body    |
| cg03614193 | 18 | 55,021,542  | 0.001453 | 0.281 | 0.195 |          |       |  | <i>ST8SIA3</i>  | Body    |
| cg23346544 | 8  | 80,731,144  | 0.008078 | 0.281 | 0.185 |          |       |  |                 |         |
| cg18178197 | 22 | 50,098,317  | 5.83E-07 | 0.281 | 0.304 |          |       |  |                 |         |
| cg23221603 | 2  | 26,963,883  | 1.51E-11 | 0.281 | 0.268 |          |       |  |                 |         |
| cg08431536 | 2  | 223,161,894 | 0.022777 | 0.281 | 0.327 |          |       |  | <i>PAX3</i>     | Body    |
| cg16501625 | 16 | 54,628,759  | 0.001731 | 0.281 | 0.216 |          |       |  |                 |         |
| cg11941920 | 6  | 79,339,195  | 0.000151 | 0.281 | 0.297 |          |       |  |                 |         |
| cg14651249 | 9  | 135,465,030 | 0.030167 | 0.281 | 0.338 |          |       |  | <i>BARHL1</i>   | 3'UTR   |
| cg24940155 | 13 | 93,896,820  | 8.45E-14 | 0.281 | 0.247 |          |       |  | <i>GPC6</i>     | Body    |
| cg23738708 | 1  | 206,240,661 | 1.25E-08 | 0.281 | 0.264 |          |       |  | <i>C1orf186</i> | Body    |
| cg07161827 | 2  | 71,680,559  | 0.037647 | 0.281 | 0.187 |          |       |  | <i>DYSF</i>     | TSS200  |
| cg00114029 | 1  | 35,351,407  | 0.002077 | 0.281 | 0.259 |          |       |  | <i>DLGAP3</i>   | Body    |
| cg11784631 | 6  | 30,658,014  | 4.07E-15 | 0.281 | 0.266 |          |       |  | <i>NRM</i>      | Body    |
| cg22689630 | 19 | 51,568,918  | 1.2E-06  | 0.281 | 0.286 |          |       |  | <i>KLK13</i>    | TSS1500 |
| cg25338563 | 8  | 103,669,495 | 0.018818 | 0.281 | 0.185 |          |       |  |                 |         |
| cg03637769 | 3  | 195,870,092 | 0.000143 | 0.281 | 0.168 |          |       |  |                 |         |
| cg13306478 | 13 | 31,317,745  | 4.19E-16 | 0.281 | 0.260 |          |       |  | <i>ALOX5AP</i>  | Body    |
| cg00042837 | 17 | 37,028,650  | 1.45E-12 | 0.281 | 0.279 |          |       |  | <i>LASP1</i>    | Body    |
| cg06272916 | 22 | 42,306,237  | 0.037366 | 0.281 | 0.258 |          |       |  |                 |         |
| cg11719362 | 7  | 25,900,355  | 0.001515 | 0.281 | 0.281 |          |       |  |                 |         |
| cg20116805 | 12 | 54,363,054  | 2.52E-05 | 0.281 | 0.308 |          |       |  | <i>HOTAIR</i>   | TSS1500 |
| cg20586076 | 10 | 133,252,332 | 1.76E-05 | 0.281 | 0.293 |          |       |  |                 |         |
| cg05997350 | 10 | 50,817,104  | 0.047515 | 0.281 | 0.349 |          |       |  | <i>SLC18A3</i>  | TSS1500 |
| cg12961080 | 14 | 99,736,143  | 0.001175 | 0.281 | 0.236 |          |       |  | <i>BCL11B</i>   | Body    |
| cg26803305 | 18 | 43,304,452  | 3.01E-12 | 0.281 | 0.261 | 2.13E-12 | 0.184 |  | <i>SLC14A1</i>  | 5'UTR   |
| cg05137450 | 2  | 233,368,263 | 0.022843 | 0.281 | 0.291 |          |       |  |                 |         |
| cg02493602 | 11 | 86,383,696  | 0.025437 | 0.281 | 0.177 |          |       |  | <i>ME3</i>      | TSS1500 |
| cg14238325 | 6  | 43,276,781  | 0.001682 | 0.281 | 0.248 |          |       |  | <i>CRIP3</i>    | TSS1500 |
| cg16038738 | 1  | 109,103,731 | 4.32E-10 | 0.281 | 0.274 |          |       |  | <i>FAM102B</i>  | Body    |



|            |    |             |          |       |       |          |       |     |                 |         |
|------------|----|-------------|----------|-------|-------|----------|-------|-----|-----------------|---------|
| cg03226666 | 6  | 124,151,503 | 4.79E-05 | 0.281 | 0.267 |          |       |     | <i>NKAIN2</i>   | Body    |
| cg12215294 | 3  | 40,350,768  | 0.000558 | 0.281 | 0.294 |          |       |     | <i>EIF1B</i>    | TSS1500 |
| cg19831403 | 10 | 88,453,678  | 1.2E-07  | 0.281 | 0.236 |          |       |     | <i>LDB3</i>     | Body    |
| cg25701114 | 6  | 26,031,939  | 0.000114 | 0.281 | 0.279 |          |       |     | <i>HIST1H3B</i> | 1stExon |
| cg08995609 | 11 | 66,104,115  | 3.16E-12 | 0.281 | 0.275 |          |       |     | <i>RIN1</i>     | TSS200  |
| cg13492692 | 9  | 126,777,673 | 2.13E-05 | 0.281 | 0.346 |          |       |     | <i>LHX2</i>     | Body    |
| cg15027606 | X  | 53,077,819  | 0.012527 | 0.281 | 0.317 |          |       |     | <i>GPR173</i>   | TSS1500 |
| cg16097858 | 2  | 46,765,700  | 2.28E-12 | 0.281 | 0.283 |          |       |     |                 |         |
| cg17543488 | 5  | 172,672,959 | 0.000194 | 0.281 | 0.331 |          |       |     |                 |         |
| cg22780193 | 13 | 74,825,252  | 1.19E-09 | 0.281 | 0.231 |          |       |     |                 |         |
| cg07909444 | 17 | 67,585,094  | 2.57E-14 | 0.281 | 0.277 |          |       |     |                 |         |
| cg10338787 | 17 | 72,931,767  | 2.66E-07 | 0.281 | 0.231 |          |       |     | <i>OTOP3</i>    | TSS200  |
| cg16863294 | X  | 72,668,847  | 0.004112 | 0.281 | 0.274 |          |       |     | <i>CDX4</i>     | Body    |
| cg25714115 | 7  | 73,895,061  | 3.41E-05 | 0.281 | 0.221 |          |       |     | <i>GTF2IRD1</i> | 5'UTR   |
| cg10046388 | 7  | 129,425,858 | 8.21E-06 | 0.281 | 0.280 |          |       | Yes |                 |         |
| cg25292098 | 20 | 31,446,183  | 1.2E-13  | 0.281 | 0.287 |          |       |     | <i>EFCAB8</i>   | TSS1500 |
| cg26429925 | 15 | 83,953,775  | 3.64E-05 | 0.281 | 0.251 |          |       |     | <i>BNC1</i>     | TSS1500 |
| cg12431299 | 2  | 241,758,282 | 2.14E-05 | 0.281 | 0.291 |          |       |     | <i>KIF1A</i>    | 5'UTR   |
| cg16876823 | 19 | 2,987,082   | 1.15E-12 | 0.281 | 0.252 |          |       |     | <i>TLE6</i>     | Body    |
| cg05673098 | 3  | 131,752,709 | 0.038941 | 0.281 | 0.437 |          |       |     | <i>CPNE4</i>    | 5'UTR   |
| cg12359279 | 21 | 42,797,953  | 2.25E-05 | 0.281 | 0.179 |          |       |     | <i>MX1</i>      | TSS200  |
| cg14666113 | 8  | 11,561,724  | 0.019402 | 0.281 | 0.285 |          |       |     | <i>GATA4</i>    | 1stExon |
| cg14684709 | 13 | 100,547,249 | 0.01157  | 0.281 | 0.209 |          |       |     | <i>CLYBL</i>    | 3'UTR   |
| cg03408135 | 1  | 207,842,833 | 0.000369 | 0.281 | 0.263 |          |       |     | <i>CR1L</i>     | Body    |
| cg01505878 | 11 | 61,690,927  | 6.33E-15 | 0.281 | 0.277 |          |       |     |                 |         |
| cg18245316 | 8  | 144,962,981 | 1.37E-21 | 0.281 | 0.275 |          |       |     |                 |         |
| cg19704853 | 11 | 125,133,609 | 4.19E-18 | 0.281 | 0.288 |          |       |     | <i>PKNOX2</i>   | 5'UTR   |
| cg21637392 | 7  | 5,735,123   | 3.32E-06 | 0.281 | 0.269 |          |       |     | <i>RNF216</i>   | Body    |
| cg12654412 | 16 | 71,459,826  | 8.13E-05 | 0.281 | 0.271 |          |       |     |                 |         |
| cg26035171 | 17 | 28,705,464  | 0.000201 | 0.281 | 0.230 |          |       |     | <i>CPD</i>      | TSS1500 |
| cg23718026 | 3  | 16,555,379  | 0.046323 | 0.281 | 0.073 |          |       |     | <i>RFTN1</i>    | TSS200  |
| cg16408970 | 10 | 28,965,584  | 1.77E-07 | 0.281 | 0.221 | 1.49E-10 | 0.125 |     | <i>BAMBI</i>    | TSS1500 |
| cg09417809 | 12 | 115,131,223 | 0.002265 | 0.281 | 0.344 |          |       |     |                 |         |
| cg04520169 | 6  | 29,894,195  | 3.6E-05  | 0.281 | 0.276 |          |       |     | <i>HCG4P6</i>   | TSS1500 |

|            |    |             |          |       |       |          |       |     |                 |         |
|------------|----|-------------|----------|-------|-------|----------|-------|-----|-----------------|---------|
| cg05291374 | 11 | 111,847,475 | 6.63E-07 | 0.281 | 0.235 |          |       |     | <i>DIXDC1</i>   | TSS1500 |
| cg06026468 | 11 | 76,315,513  | 2.79E-13 | 0.281 | 0.275 |          |       |     |                 |         |
| cg08103988 | 17 | 6,558,365   | 0.002741 | 0.281 | 0.316 |          |       |     |                 |         |
| cg08762247 | 17 | 53,800,372  | 0.002655 | 0.281 | 0.301 | 1.05E-22 | 0.268 |     | <i>TMEM100</i>  | TSS200  |
| cg05060949 | 7  | 156,798,581 | 0.000396 | 0.281 | 0.317 |          |       |     | <i>MXN1</i>     | Body    |
| cg18367631 | 7  | 653,309     | 1.7E-06  | 0.281 | 0.281 |          |       |     | <i>PRKAR1B</i>  | Body    |
| cg06414921 | 6  | 31,276,504  | 0.030614 | 0.281 | 0.242 |          |       |     |                 |         |
| cg10494684 | 17 | 26,645,200  | 0.0037   | 0.281 | 0.295 |          |       |     | <i>TMEM97</i>   | TSS1500 |
| cg04182483 | 10 | 121,259,610 | 0.000357 | 0.281 | 0.216 |          |       | Yes | <i>RGS10</i>    | 3'UTR   |
| cg13480493 | 9  | 102,613,887 | 1.18E-09 | 0.281 | 0.255 |          |       |     | <i>NR4A3</i>    | Body    |
| cg08290076 | 11 | 110,581,434 | 2.05E-05 | 0.281 | 0.270 |          |       |     | <i>ARHGAP20</i> | Body    |
| cg25685519 | 14 | 52,536,721  | 2.63E-08 | 0.281 | 0.270 |          |       |     | <i>NID2</i>     | TSS1500 |
| cg06480171 | 2  | 37,853,482  | 1.18E-10 | 0.281 | 0.270 |          |       |     |                 |         |
| cg03120289 | 1  | 99,470,550  | 0.005451 | 0.281 | 0.333 |          |       |     | <i>LPPR5</i>    | TSS200  |
| cg13413982 | 13 | 44,868,172  | 5.98E-17 | 0.281 | 0.294 |          |       |     |                 |         |
| cg18534491 | 14 | 24,641,155  | 3.98E-12 | 0.281 | 0.282 |          |       |     | <i>REC8</i>     | TSS200  |
| cg04759376 | 10 | 77,190,437  | 5.95E-11 | 0.281 | 0.245 |          |       |     |                 |         |
| cg05194346 | 15 | 101,305,443 | 1.3E-13  | 0.281 | 0.261 |          |       |     |                 |         |
| cg09004287 | 6  | 10,426,387  | 3.68E-06 | 0.281 | 0.276 |          |       |     |                 |         |
| cg26232308 | 1  | 18,201,537  | 1.68E-15 | 0.281 | 0.275 |          |       |     |                 |         |
| cg23906738 | 14 | 36,987,301  | 0.048421 | 0.281 | 0.286 |          |       |     | <i>NKX2-1</i>   | Body    |
| cg21337832 | X  | 24,665,655  | 0.025534 | 0.281 | 0.256 |          |       |     | <i>PCYT1B</i>   | Body    |
| cg18750960 | 2  | 177,016,417 | 3.07E-05 | 0.281 | 0.266 | 1.94E-13 | 0.155 |     | <i>HOXD4</i>    | 1stExon |
| cg19237113 | 1  | 6,803,800   | 1.47E-05 | 0.281 | 0.295 |          |       |     |                 |         |
| cg21596858 | 1  | 155,007,254 | 2.27E-10 | 0.281 | 0.230 | 7.12E-18 | 0.178 |     | <i>DCST1</i>    | Body    |
| cg06721601 | 7  | 101,762,633 | 4.46E-14 | 0.281 | 0.254 |          |       |     | <i>CUX1</i>     | Body    |
| cg19763461 | 2  | 63,284,557  | 2.74E-05 | 0.281 | 0.251 |          |       |     |                 |         |
| cg21317965 | 6  | 50,803,850  | 4.06E-05 | 0.281 | 0.267 |          |       |     | <i>TFAP2B</i>   | Body    |
| cg25928986 | 7  | 96,647,079  | 2.49E-05 | 0.281 | 0.299 |          |       |     |                 |         |
| cg10049789 | 4  | 8,202,531   | 4.91E-05 | 0.281 | 0.267 |          |       |     | <i>SH3TC1</i>   | 5'UTR   |
| cg18041884 | 12 | 109,162,555 | 0.001531 | 0.281 | 0.168 |          |       |     |                 |         |
| cg14630933 | 6  | 32,076,093  | 1.86E-06 | 0.281 | 0.320 |          |       |     | <i>TNXB</i>     | 5'UTR   |
| cg14769786 | 17 | 1,881,333   | 0.002067 | 0.281 | 0.283 |          |       |     | <i>RTN4RL1</i>  | Body    |
| cg10835584 | 18 | 55,108,852  | 0.030486 | 0.281 | 0.307 |          |       |     | <i>ONECUT2</i>  | Body    |

|            |    |             |          |       |       |  |  |  |                |         |
|------------|----|-------------|----------|-------|-------|--|--|--|----------------|---------|
| cg26391832 | 2  | 45,237,929  | 6.15E-06 | 0.281 | 0.216 |  |  |  | <i>SIX2</i>    | TSS1500 |
| cg22226592 | 1  | 109,439,213 | 5.63E-19 | 0.281 | 0.263 |  |  |  | <i>GPSM2</i>   | Body    |
| cg13409645 | 19 | 55,866,261  | 0.001546 | 0.281 | 0.186 |  |  |  | <i>COX6B2</i>  | TSS200  |
| cg17677030 | 2  | 50,575,069  | 7.73E-06 | 0.281 | 0.187 |  |  |  | <i>NRXN1</i>   | Body    |
| cg25790298 | 3  | 172,031,063 | 6.2E-19  | 0.281 | 0.276 |  |  |  | <i>FNDC3B</i>  | Body    |
| cg02506527 | X  | 39,868,153  | 2.62E-06 | 0.281 | 0.265 |  |  |  |                |         |
| cg26665891 | 1  | 204,159,832 | 0.016445 | 0.281 | 0.234 |  |  |  | <i>KISS1</i>   | Body    |
| cg21210224 | 15 | 65,186,306  | 0.001485 | 0.281 | 0.236 |  |  |  |                |         |
| cg27559661 | 16 | 57,125,836  | 0.047286 | 0.281 | 0.222 |  |  |  | <i>CPNE2</i>   | TSS1500 |
| cg03733760 | 11 | 69,517,841  | 1.45E-05 | 0.281 | 0.301 |  |  |  | <i>FGF19</i>   | Body    |
| cg07890839 | 15 | 67,359,525  | 0.000185 | 0.281 | 0.187 |  |  |  | <i>SMAD3</i>   | Body    |
| cg01922613 | 1  | 94,560,851  | 3.41E-11 | 0.281 | 0.236 |  |  |  | <i>ABCA4</i>   | Body    |
| cg12811449 | 14 | 60,972,853  | 1.56E-06 | 0.280 | 0.266 |  |  |  |                |         |
| cg17338430 | 5  | 170,739,853 | 0.012617 | 0.280 | 0.317 |  |  |  |                |         |
| cg03404566 | 17 | 6,899,310   | 1.65E-06 | 0.280 | 0.207 |  |  |  | <i>ALOX12</i>  | TSS200  |
| cg16137928 | 6  | 30,720,491  | 0.000459 | 0.280 | 0.154 |  |  |  |                |         |
| cg03741862 | 17 | 63,225,392  | 0.00089  | 0.280 | 0.316 |  |  |  |                |         |
| cg06418113 | 18 | 43,915,901  | 6.76E-19 | 0.280 | 0.273 |  |  |  | <i>RNF165</i>  | Body    |
| cg08599448 | 19 | 11,689,614  | 2.68E-05 | 0.280 | 0.276 |  |  |  | <i>ACP5</i>    | TSS1500 |
| cg06402325 | 1  | 85,464,166  | 2.39E-12 | 0.280 | 0.263 |  |  |  | <i>MCOLN2</i>  | TSS1500 |
| cg19084726 | 1  | 145,075,538 | 2.56E-05 | 0.280 | 0.201 |  |  |  | <i>PDE4DIP</i> | Body    |
| cg07448795 | 22 | 21,368,419  | 4.6E-05  | 0.280 | 0.297 |  |  |  | <i>P2RX6</i>   | TSS1500 |
| cg11303301 | 8  | 144,577,185 | 9.12E-20 | 0.280 | 0.259 |  |  |  | <i>ZC3H3</i>   | Body    |
| cg19132069 | 11 | 124,631,666 | 1.36E-16 | 0.280 | 0.274 |  |  |  | <i>ESAM</i>    | Body    |
| cg24319171 | 12 | 187,480     | 1.46E-13 | 0.280 | 0.230 |  |  |  | <i>IQSEC3</i>  | Body    |
| cg05857999 | 6  | 31,650,760  | 1.02E-11 | 0.280 | 0.290 |  |  |  |                |         |
| cg10617784 | 2  | 71,134,586  | 0.000142 | 0.280 | 0.285 |  |  |  | <i>VAX2</i>    | Body    |
| cg08618463 | 4  | 146,467,791 | 3.1E-13  | 0.280 | 0.273 |  |  |  | <i>SMAD1</i>   | Body    |
| cg23119604 | 6  | 30,227,854  | 1.71E-09 | 0.280 | 0.282 |  |  |  | <i>HLA-L</i>   | Body    |
| cg01636505 | 14 | 94,408,232  | 3.74E-25 | 0.280 | 0.249 |  |  |  | <i>ASB2</i>    | Body    |
| cg03255953 | 3  | 127,056,837 | 3.76E-06 | 0.280 | 0.340 |  |  |  |                |         |
| cg19312667 | 4  | 25,090,491  | 0.000619 | 0.280 | 0.264 |  |  |  |                |         |
| cg22209929 | 3  | 172,394,700 | 3.68E-12 | 0.280 | 0.287 |  |  |  | <i>NCEH1</i>   | 5'UTR   |
| cg08865350 | 19 | 408,639     | 7.7E-06  | 0.280 | 0.215 |  |  |  | <i>C2CD4C</i>  | 5'UTR   |

|            |    |             |          |       |       |  |  |  |                  |         |
|------------|----|-------------|----------|-------|-------|--|--|--|------------------|---------|
| cg07431286 | 5  | 72,526,496  | 0.024975 | 0.280 | 0.273 |  |  |  |                  |         |
| cg14328115 | 11 | 2,554,562   | 1.96E-07 | 0.280 | 0.270 |  |  |  | <i>KCNQ1</i>     | Body    |
| cg02666566 | 6  | 2,510,173   | 9.93E-17 | 0.280 | 0.260 |  |  |  |                  |         |
| cg06452129 | 16 | 85,265,566  | 4.78E-09 | 0.280 | 0.222 |  |  |  |                  |         |
| cg08961621 | 21 | 39,644,244  | 2.08E-12 | 0.280 | 0.247 |  |  |  | <i>KCNJ15</i>    | 5'UTR   |
| cg17495087 | 8  | 96,085,689  | 4.58E-06 | 0.280 | 0.263 |  |  |  |                  |         |
| cg06638787 | 6  | 5,997,243   | 0.000281 | 0.280 | 0.270 |  |  |  |                  |         |
| cg07023459 | 1  | 113,265,410 | 1.74E-07 | 0.280 | 0.287 |  |  |  | <i>FAM19A3</i>   | Body    |
| cg16546016 | 4  | 121,994,092 | 3.05E-05 | 0.280 | 0.280 |  |  |  | <i>C4orf31</i>   | TSS1500 |
| cg11225405 | 1  | 117,038,246 | 1.13E-11 | 0.280 | 0.285 |  |  |  |                  |         |
| cg19388776 | 3  | 71,835,112  | 4.01E-07 | 0.280 | 0.258 |  |  |  | <i>PROK2</i>     | TSS1500 |
| cg26597539 | 5  | 40,680,670  | 0.009299 | 0.280 | 0.366 |  |  |  | <i>PTGER4</i>    | 5'UTR   |
| cg03749016 | 8  | 23,564,591  | 0.000439 | 0.280 | 0.199 |  |  |  | <i>NKX2-6</i>    | TSS1500 |
| cg19885625 | 11 | 64,815,313  | 2.15E-05 | 0.280 | 0.282 |  |  |  | <i>NAALADL1</i>  | Body    |
| cg02479497 | 16 | 85,548,895  | 9.18E-06 | 0.280 | 0.263 |  |  |  |                  |         |
| cg08883078 | 2  | 97,291,520  | 1.62E-10 | 0.280 | 0.259 |  |  |  | <i>KIAA1310</i>  | Body    |
| cg14598478 | 15 | 84,363,061  | 1.35E-07 | 0.280 | 0.263 |  |  |  | <i>ADAMTSL3</i>  | Body    |
| cg10253457 | 15 | 101,460,077 | 0.045617 | 0.280 | 0.135 |  |  |  | <i>LRRK1</i>     | 5'UTR   |
| cg19024969 | 17 | 32,905,966  | 0.004037 | 0.280 | 0.265 |  |  |  | <i>C17orf102</i> | 1stExon |
| cg22928082 | 20 | 3,218,522   | 2.64E-14 | 0.280 | 0.257 |  |  |  | <i>SLC4A11</i>   | TSS200  |
| cg11015893 | 7  | 135,433,540 | 1.02E-09 | 0.280 | 0.230 |  |  |  | <i>FAM180A</i>   | 1stExon |
| cg02816816 | 4  | 17,783,356  | 2.44E-06 | 0.280 | 0.257 |  |  |  | <i>FAM184B</i>   | TSS1500 |
| cg00968638 | 2  | 43,450,965  | 0.002846 | 0.280 | 0.224 |  |  |  | <i>ZFP36L2</i>   | 3'UTR   |
| cg06001519 | 13 | 23,500,838  | 0.000804 | 0.280 | 0.289 |  |  |  |                  |         |
| cg23642827 | 10 | 98,751,284  | 6.07E-18 | 0.280 | 0.276 |  |  |  |                  |         |
| cg07176692 | 1  | 113,500,329 | 4.84E-05 | 0.280 | 0.174 |  |  |  | <i>SLC16A1</i>   | TSS1500 |
| cg14784372 | 10 | 2,951,257   | 7.63E-08 | 0.280 | 0.236 |  |  |  |                  |         |
| cg01357135 | 3  | 160,475,128 | 1.02E-09 | 0.280 | 0.289 |  |  |  | <i>PPM1L</i>     | Body    |
| cg25360181 | 6  | 43,970,084  | 0.022306 | 0.280 | 0.339 |  |  |  | <i>C6orf223</i>  | Body    |
| cg10327400 | 14 | 42,075,406  | 2.42E-06 | 0.280 | 0.350 |  |  |  | <i>LRFN5</i>     | TSS1500 |
| cg10809134 | 2  | 47,879,734  | 8.58E-15 | 0.280 | 0.274 |  |  |  |                  |         |
| cg13012916 | 14 | 36,973,691  | 0.000819 | 0.280 | 0.380 |  |  |  | <i>SFTA3</i>     | Body    |
| cg04422003 | 7  | 28,448,295  | 5.22E-11 | 0.280 | 0.258 |  |  |  | <i>CREB5</i>     | 5'UTR   |
| cg10893278 | 12 | 54,377,225  | 0.000206 | 0.280 | 0.233 |  |  |  |                  |         |

|            |    |             |          |       |       |          |       |     |  |                 |         |
|------------|----|-------------|----------|-------|-------|----------|-------|-----|--|-----------------|---------|
| cg18537730 | 19 | 49,250,080  | 2.97E-08 | 0.280 | 0.274 |          |       |     |  | <i>IZUMO1</i>   | 1stExon |
| cg22525688 | 7  | 74,001,908  | 2.09E-09 | 0.280 | 0.266 |          |       |     |  | <i>GTF2IRD1</i> | Body    |
| cg04689048 | 19 | 46,999,289  | 1E-09    | 0.280 | 0.289 |          |       |     |  | <i>PNMAL2</i>   | TSS200  |
| cg00503383 | 1  | 91,301,651  | 2.19E-05 | 0.280 | 0.320 |          |       |     |  |                 |         |
| cg02853616 | 4  | 94,755,787  | 1.39E-06 | 0.280 | 0.282 |          |       |     |  |                 |         |
| cg13736811 | 19 | 41,873,930  | 8.55E-11 | 0.280 | 0.263 |          |       |     |  | <i>TMEM91</i>   | 5'UTR   |
| cg26701289 | 15 | 73,611,289  | 8.22E-05 | 0.280 | 0.248 |          |       |     |  |                 |         |
| cg25012961 | 5  | 124,034,288 | 6.55E-09 | 0.280 | 0.265 |          |       |     |  | <i>ZNF608</i>   | Body    |
| cg01368217 | 10 | 127,836,603 | 0.000166 | 0.280 | 0.275 |          |       |     |  | <i>ADAM12</i>   | Body    |
| cg23619365 | 13 | 112,712,009 | 0.029174 | 0.280 | 0.350 |          |       |     |  |                 |         |
| cg08342194 | 6  | 31,683,075  | 1.03E-09 | 0.280 | 0.295 |          |       |     |  | <i>LY6G6E</i>   | TSS1500 |
| cg18270378 | 7  | 3,284,394   | 8.57E-13 | 0.280 | 0.273 |          |       |     |  |                 |         |
| cg22488857 | 7  | 100,489,022 | 3.78E-05 | 0.280 | 0.277 |          |       |     |  | <i>ACHE</i>     | Body    |
| cg13813458 | 17 | 35,085,134  | 7.81E-09 | 0.280 | 0.289 |          |       |     |  |                 |         |
| cg20041567 | 6  | 27,841,067  | 0.000194 | 0.280 | 0.290 |          |       |     |  | <i>HIST1H4L</i> | 1stExon |
| cg08667128 | 17 | 29,886,885  | 0.000868 | 0.280 | 0.353 |          |       |     |  | <i>MIR193A</i>  | TSS200  |
| cg02340083 | 1  | 50,882,006  | 0.025333 | 0.280 | 0.234 |          |       |     |  |                 |         |
| cg03020810 | 10 | 102,890,984 | 0.048272 | 0.280 | 0.197 |          |       |     |  | <i>TLX1</i>     | TSS200  |
| cg00151370 | 6  | 16,323,285  | 2.98E-20 | 0.280 | 0.273 |          |       |     |  | <i>ATXN1</i>    | Body    |
| cg13458609 | 9  | 130,608,923 | 1.35E-10 | 0.280 | 0.300 |          |       |     |  | <i>ENG</i>      | Body    |
| cg13702629 | 15 | 66,546,648  | 1.05E-05 | 0.280 | 0.256 |          |       |     |  | <i>MEGF11</i>   | TSS1500 |
| cg27646729 | 12 | 3,373,764   | 2.08E-17 | 0.280 | 0.251 |          |       |     |  | <i>TSPAN9</i>   | Body    |
| cg03543593 | 6  | 32,076,417  | 1.01E-05 | 0.280 | 0.323 | 2.4E-15  | 0.199 | Yes |  | <i>TNXB</i>     | 5'UTR   |
| cg04295144 | 19 | 10,407,184  | 6.47E-07 | 0.280 | 0.226 |          |       |     |  | <i>ICAM5</i>    | Body    |
| cg10149996 | X  | 118,369,686 | 5.88E-15 | 0.280 | 0.248 |          |       |     |  | <i>PGRMC1</i>   | TSS1500 |
| cg19879075 | 10 | 73,846,858  | 9.82E-07 | 0.280 | 0.321 |          |       |     |  | <i>SPOCK2</i>   | Body    |
| cg12830671 | 10 | 73,335,297  | 1.64E-12 | 0.279 | 0.263 |          |       |     |  | <i>CDH23</i>    | Body    |
| cg23138608 | 14 | 91,770,145  | 2.05E-14 | 0.279 | 0.239 |          |       |     |  | <i>CCDC88C</i>  | Body    |
| cg02132284 | 17 | 15,686,473  | 3.35E-10 | 0.279 | 0.245 |          |       |     |  |                 |         |
| cg09088834 | 20 | 25,565,460  | 1.14E-06 | 0.279 | 0.171 | 1.93E-30 | 0.240 |     |  | <i>NINL</i>     | 5'UTR   |
| cg17265829 | 4  | 126,238,422 | 0.001314 | 0.279 | 0.262 |          |       |     |  | <i>FAT4</i>     | 1stExon |
| cg11230435 | 10 | 30,724,374  | 8.85E-06 | 0.279 | 0.205 |          |       |     |  | <i>MAP3K8</i>   | 5'UTR   |
| cg14823789 | 17 | 72,322,612  | 5.65E-07 | 0.279 | 0.248 |          |       |     |  | <i>KIF19</i>    | Body    |
| cg22044566 | 2  | 14,772,312  | 2.17E-08 | 0.279 | 0.222 |          |       |     |  | <i>FAM84A</i>   | TSS1500 |

|            |    |             |          |       |       |          |       |  |                  |         |
|------------|----|-------------|----------|-------|-------|----------|-------|--|------------------|---------|
| cg00927495 | 9  | 96,715,687  | 8.15E-08 | 0.279 | 0.308 |          |       |  | <i>BARX1</i>     | Body    |
| cg22617819 | 1  | 44,378,782  | 3.52E-16 | 0.279 | 0.234 |          |       |  | <i>ST3GAL3</i>   | Body    |
| cg12110750 | 19 | 31,839,577  | 0.001333 | 0.279 | 0.133 |          |       |  | <i>TSHZ3</i>     | Body    |
| cg11306441 | 12 | 54,520,919  | 0.015777 | 0.279 | 0.258 |          |       |  | <i>LOC400043</i> | Body    |
| cg20738500 | 15 | 89,921,156  | 0.000125 | 0.279 | 0.256 |          |       |  | <i>LOC254559</i> | TSS200  |
| cg26459700 | 10 | 12,390,907  | 0.016633 | 0.279 | 0.135 |          |       |  | <i>CAMK1D</i>    | TSS1500 |
| cg05057720 | 14 | 38,724,675  | 7.86E-07 | 0.279 | 0.289 |          |       |  | <i>CLEC14A</i>   | 1stExon |
| cg20780998 | X  | 12,996,931  | 0.000136 | 0.279 | 0.300 |          |       |  |                  |         |
| cg23167259 | 10 | 102,495,509 | 0.002678 | 0.279 | 0.291 |          |       |  |                  |         |
| cg09887284 | 12 | 54,388,147  | 0.01097  | 0.279 | 0.332 |          |       |  |                  |         |
| cg04524477 | 17 | 41,363,597  | 1.49E-16 | 0.279 | 0.266 |          |       |  | <i>NBR1</i>      | 3'UTR   |
| cg05263113 | 16 | 47,921,291  | 0.030478 | 0.279 | 0.187 |          |       |  |                  |         |
| cg19426827 | 14 | 105,191,118 | 9.57E-08 | 0.279 | 0.275 | 1.63E-27 | 0.204 |  | <i>ADSSL1</i>    | Body    |
| cg01107185 | 7  | 138,795,041 | 7.82E-08 | 0.279 | 0.211 |          |       |  | <i>ZC3HAV1</i>   | TSS1500 |
| cg02409878 | 8  | 99,960,498  | 1.27E-06 | 0.279 | 0.283 |          |       |  | <i>OSR2</i>      | 5'UTR   |
| cg23774988 | 11 | 128,419,199 | 2.55E-06 | 0.279 | 0.293 |          |       |  | <i>ETS1</i>      | Body    |
| cg18618206 | 17 | 754,296     | 5.05E-17 | 0.279 | 0.266 |          |       |  | <i>NXN</i>       | Body    |
| cg03702533 | 15 | 77,830,579  | 2.24E-07 | 0.279 | 0.273 |          |       |  |                  |         |
| cg06776703 | 19 | 4,328,759   | 2.67E-06 | 0.279 | 0.286 |          |       |  | <i>STAP2</i>     | Body    |
| cg13683990 | 6  | 33,161,292  | 0.000382 | 0.279 | 0.244 |          |       |  | <i>COL11A2</i>   | TSS1500 |
| cg02951847 | 4  | 41,614,490  | 5.58E-08 | 0.279 | 0.235 |          |       |  | <i>LIMCH1</i>    | Body    |
| cg20264543 | 3  | 128,787,213 | 3.71E-07 | 0.279 | 0.269 |          |       |  |                  |         |
| cg01286655 | 11 | 12,031,099  | 0.001139 | 0.279 | 0.254 |          |       |  | <i>DKK3</i>      | TSS1500 |
| cg02718725 | 1  | 95,392,925  | 0.024548 | 0.279 | 0.104 | 2.11E-17 | 0.174 |  | <i>CNN3</i>      | TSS200  |
| cg08509586 | 11 | 16,797,315  | 5.82E-29 | 0.279 | 0.257 |          |       |  |                  |         |
| cg12892506 | 3  | 147,113,918 | 0.048752 | 0.279 | 0.326 |          |       |  | <i>ZIC4</i>      | Body    |
| cg13570101 | 5  | 172,661,859 | 0.001056 | 0.279 | 0.184 |          |       |  | <i>NKX2-5</i>    | 1stExon |
| cg12910087 | 4  | 175,140,004 | 1.31E-07 | 0.279 | 0.270 |          |       |  |                  |         |
| cg23972860 | 1  | 7,395,024   | 9.59E-05 | 0.279 | 0.168 |          |       |  | <i>CAMTA1</i>    | Body    |
| cg06649048 | 6  | 114,176,811 | 0.002773 | 0.279 | 0.132 |          |       |  |                  |         |
| cg04442426 | 5  | 37,832,522  | 1.46E-07 | 0.279 | 0.282 |          |       |  | <i>GDNF</i>      | Body    |
| cg19307545 | 10 | 35,028,929  | 0.000377 | 0.279 | 0.178 |          |       |  | <i>PARD3</i>     | Body    |
| cg23325963 | 2  | 45,160,093  | 1.68E-06 | 0.279 | 0.262 |          |       |  |                  |         |
| cg00842231 | 19 | 11,352,474  | 6.58E-75 | 0.279 | 0.269 |          |       |  | <i>LOC55908</i>  | 3'UTR   |

|            |    |             |          |       |       |          |       |  |                  |         |
|------------|----|-------------|----------|-------|-------|----------|-------|--|------------------|---------|
| cg14189049 | 15 | 89,909,748  | 1.96E-05 | 0.279 | 0.259 |          |       |  | <i>MIR9-3</i>    | TSS1500 |
| cg19708901 | 1  | 180,882,655 | 3.49E-20 | 0.279 | 0.268 |          |       |  | <i>KIAA1614</i>  | Body    |
| cg11213574 | 22 | 50,623,692  | 4.36E-05 | 0.279 | 0.288 |          |       |  | <i>TRABD</i>     | TSS1500 |
| cg16713262 | 16 | 79,623,751  | 0.003743 | 0.279 | 0.259 |          |       |  |                  |         |
| cg02430645 | 13 | 20,989,325  | 1.81E-15 | 0.279 | 0.248 |          |       |  | <i>CRYL1</i>     | Body    |
| cg04191989 | 7  | 630,914     | 2.7E-09  | 0.279 | 0.245 |          |       |  | <i>PRKAR1B</i>   | Body    |
| cg14957186 | 10 | 72,977,773  | 7.92E-11 | 0.279 | 0.262 |          |       |  | <i>UNC5B</i>     | Body    |
| cg21739530 | 4  | 174,186,068 | 3.17E-07 | 0.279 | 0.321 |          |       |  | <i>GALNT7</i>    | Body    |
| cg16711011 | 2  | 568,198     | 2.47E-09 | 0.279 | 0.220 |          |       |  |                  |         |
| cg25012739 | 2  | 132,058,031 | 9.39E-09 | 0.279 | 0.272 |          |       |  |                  |         |
| cg06333719 | 11 | 100,557,736 | 5.52E-07 | 0.279 | 0.253 |          |       |  | <i>FLJ32810</i>  | TSS1500 |
| cg21183256 | 8  | 73,163,868  | 0.016668 | 0.279 | 0.315 |          |       |  |                  |         |
| cg21333674 | 8  | 96,705,765  | 0.000313 | 0.279 | 0.227 |          |       |  |                  |         |
| cg06976096 | 3  | 87,138,510  | 0.000414 | 0.279 | 0.169 |          |       |  |                  |         |
| cg07355157 | 10 | 23,385,780  | 2.9E-10  | 0.279 | 0.248 |          |       |  | <i>MSRB2</i>     | Body    |
| cg26559804 | 11 | 128,391,271 | 6.19E-06 | 0.279 | 0.268 |          |       |  | <i>ETS1</i>      | Body    |
| cg26961808 | 7  | 128,470,913 | 2.73E-05 | 0.279 | 0.289 |          |       |  | <i>FLNC</i>      | 1stExon |
| cg11116274 | 10 | 134,334,283 | 3.75E-16 | 0.279 | 0.281 |          |       |  |                  |         |
| cg18856581 | 14 | 48,145,000  | 0.009811 | 0.279 | 0.342 |          |       |  | <i>MDGA2</i>     | TSS1500 |
| cg05143530 | 3  | 197,439,242 | 3.56E-07 | 0.279 | 0.270 |          |       |  | <i>KIAA0226</i>  | Body    |
| cg11225090 | 4  | 185,276,573 | 6.15E-05 | 0.279 | 0.232 |          |       |  |                  |         |
| cg16946997 | X  | 51,076,330  | 0.037089 | 0.279 | 0.129 |          |       |  | <i>NUDT10</i>    | Body    |
| cg07950002 | 9  | 131,465,811 | 6.87E-08 | 0.279 | 0.286 |          |       |  | <i>PKN3</i>      | Body    |
| cg02575448 | 5  | 140,749,735 | 0.004079 | 0.279 | 0.326 |          |       |  | <i>PCDHGA4</i>   | Body    |
| cg13995427 | 9  | 117,134,861 | 0.000267 | 0.279 | 0.288 |          |       |  | <i>AKNA</i>      | Body    |
| cg02938601 | 8  | 22,961,088  | 0.013187 | 0.279 | 0.233 |          |       |  | <i>TNFRSF10C</i> | Body    |
| cg23632985 | 11 | 20,184,637  | 0.011687 | 0.279 | 0.286 |          |       |  |                  |         |
| cg26525342 | 16 | 3,221,466   | 1.14E-09 | 0.279 | 0.273 |          |       |  |                  |         |
| cg26946821 | 17 | 35,292,390  | 0.001571 | 0.279 | 0.229 |          |       |  |                  |         |
| cg04164415 | 18 | 21,199,797  | 0.000903 | 0.279 | 0.292 |          |       |  | <i>ANKRD29</i>   | Body    |
| cg20231084 | 11 | 130,700,487 | 6.91E-18 | 0.279 | 0.279 |          |       |  |                  |         |
| cg23947376 | 10 | 27,548,601  | 5E-11    | 0.279 | 0.282 |          |       |  |                  |         |
| cg25358289 | 5  | 140,012,728 | 0.011065 | 0.279 | 0.331 | 5.49E-11 | 0.123 |  | <i>CD14</i>      | 1stExon |
| cg00577560 | 1  | 15,271,830  | 1.28E-10 | 0.279 | 0.251 |          |       |  | <i>KIAA1026</i>  | Body    |

|            |    |             |          |       |       |  |  |  |                 |         |
|------------|----|-------------|----------|-------|-------|--|--|--|-----------------|---------|
| cg26883974 | 13 | 20,768,523  | 1.36E-05 | 0.279 | 0.291 |  |  |  | <i>GJB2</i>     | TSS1500 |
| cg01343424 | 10 | 31,073,383  | 0.003402 | 0.279 | 0.141 |  |  |  |                 |         |
| cg02082083 | 1  | 20,396,560  | 5.54E-21 | 0.279 | 0.276 |  |  |  | <i>PLA2G5</i>   | TSS200  |
| cg01900413 | 11 | 128,419,356 | 1.56E-09 | 0.279 | 0.259 |  |  |  | <i>ETS1</i>     | Body    |
| cg06668065 | 5  | 92,909,069  | 7.65E-05 | 0.279 | 0.212 |  |  |  | <i>FLJ42709</i> | Body    |
| cg19822518 | 3  | 71,834,840  | 7.58E-05 | 0.279 | 0.295 |  |  |  | <i>PROK2</i>    | TSS1500 |
| cg23688817 | 7  | 87,105,293  | 5.79E-05 | 0.279 | 0.238 |  |  |  | <i>ABCB4</i>    | TSS1500 |
| cg26797073 | 2  | 131,129,811 | 0.002154 | 0.279 | 0.224 |  |  |  | <i>PTPN18</i>   | Body    |
| cg13643914 | 4  | 122,302,226 | 0.035338 | 0.279 | 0.256 |  |  |  | <i>QRFPFR</i>   | TSS200  |
| cg11293610 | 21 | 34,755,681  | 3.42E-08 | 0.279 | 0.297 |  |  |  |                 |         |
| cg05608790 | 7  | 69,427,388  | 2.14E-20 | 0.279 | 0.289 |  |  |  | <i>AUTS2</i>    | Body    |
| cg15996397 | 2  | 100,831,189 | 9.67E-15 | 0.279 | 0.271 |  |  |  |                 |         |
| cg10058779 | 14 | 23,821,435  | 8.73E-08 | 0.279 | 0.217 |  |  |  | <i>SLC22A17</i> | 5'UTR   |
| cg11940040 | 17 | 154,420     | 0.001267 | 0.279 | 0.220 |  |  |  | <i>RPH3AL</i>   | Body    |
| cg27423228 | 3  | 43,021,399  | 4.51E-07 | 0.279 | 0.158 |  |  |  | <i>FAM198A</i>  | Body    |
| cg01529637 | 20 | 50,721,911  | 0.001948 | 0.278 | 0.317 |  |  |  | <i>ZFP64</i>    | Body    |
| cg13818424 | 17 | 70,339,099  | 2.2E-11  | 0.278 | 0.285 |  |  |  |                 |         |
| cg07724309 | 6  | 6,009,556   | 0.020418 | 0.278 | 0.297 |  |  |  |                 |         |
| cg15820062 | 8  | 23,584,404  | 0.001439 | 0.278 | 0.175 |  |  |  |                 |         |
| cg02456451 | 7  | 156,871,073 | 4.55E-07 | 0.278 | 0.264 |  |  |  |                 |         |
| cg14269807 | 14 | 22,191,888  | 6.14E-13 | 0.278 | 0.254 |  |  |  |                 |         |
| cg15426660 | 7  | 140,347,007 | 1.7E-12  | 0.278 | 0.262 |  |  |  |                 |         |
| cg01658421 | 2  | 176,945,899 | 6.01E-06 | 0.278 | 0.295 |  |  |  | <i>EVX2</i>     | Body    |
| cg03949284 | 6  | 33,161,333  | 0.007426 | 0.278 | 0.256 |  |  |  | <i>COL11A2</i>  | TSS1500 |
| cg12254517 | 12 | 93,454,991  | 1.28E-07 | 0.278 | 0.291 |  |  |  |                 |         |
| cg23551494 | 17 | 39,495,535  | 2.32E-07 | 0.278 | 0.252 |  |  |  |                 |         |
| cg12143439 | 5  | 140,012,660 | 0.011144 | 0.278 | 0.318 |  |  |  | <i>CD14</i>     | 1stExon |
| cg02332982 | 12 | 45,444,420  | 0.000377 | 0.278 | 0.299 |  |  |  | <i>DBX2</i>     | 1stExon |
| cg18375441 | 4  | 123,749,187 | 0.002678 | 0.278 | 0.127 |  |  |  | <i>FGF2</i>     | Body    |
| cg18444673 | 19 | 36,389,500  | 4.33E-13 | 0.278 | 0.224 |  |  |  | <i>NFKBID</i>   | 5'UTR   |
| cg18974921 | 11 | 78,131,895  | 4.36E-10 | 0.278 | 0.254 |  |  |  |                 |         |
| cg01597398 | 17 | 40,250,727  | 2.2E-22  | 0.278 | 0.267 |  |  |  |                 |         |
| cg24405179 | 1  | 226,411,259 | 0.002828 | 0.278 | 0.350 |  |  |  | <i>MIXL1</i>    | TSS200  |
| cg13052034 | 1  | 66,999,238  | 0.039357 | 0.278 | 0.300 |  |  |  | <i>SGIP1</i>    | TSS1500 |



|            |    |             |          |       |       |          |       |  |     |                |         |
|------------|----|-------------|----------|-------|-------|----------|-------|--|-----|----------------|---------|
| cg23170347 | 3  | 64,253,795  | 1.55E-14 | 0.278 | 0.279 |          |       |  |     |                |         |
| cg15135286 | 2  | 33,359,281  | 1.97E-07 | 0.278 | 0.238 |          |       |  |     | <i>LTBP1</i>   | Body    |
| cg15361590 | 5  | 140,864,701 | 6.31E-08 | 0.278 | 0.262 | 3.71E-15 | 0.198 |  |     | <i>PCDHGA4</i> | Body    |
| cg12691382 | 11 | 33,037,792  | 0.012225 | 0.278 | 0.392 |          |       |  |     | <i>DEPDC7</i>  | 5'UTR   |
| cg22109795 | 1  | 210,468,650 | 2.6E-06  | 0.278 | 0.288 |          |       |  |     |                |         |
| cg21707187 | 12 | 54,345,862  | 0.026484 | 0.278 | 0.286 |          |       |  |     |                |         |
| cg05793013 | 16 | 54,546,975  | 2.9E-108 | 0.278 | 0.268 |          |       |  |     |                |         |
| cg03260566 | 4  | 20,256,841  | 9.57E-08 | 0.278 | 0.291 |          |       |  |     | <i>SLIT2</i>   | Body    |
| cg16644023 | 7  | 27,154,845  | 2.53E-11 | 0.278 | 0.245 |          |       |  |     | <i>HOXA3</i>   | 5'UTR   |
| cg17042098 | 1  | 61,519,631  | 1E-05    | 0.278 | 0.265 |          |       |  |     |                |         |
| cg03212133 | X  | 135,057,092 | 5.65E-05 | 0.278 | 0.252 |          |       |  |     | <i>MMGT1</i>   | TSS1500 |
| cg17922359 | 4  | 13,530,923  | 0.001816 | 0.278 | 0.289 |          |       |  |     |                |         |
| cg18073240 | 15 | 40,731,970  | 4.08E-20 | 0.278 | 0.267 |          |       |  |     | <i>BAHD1</i>   | TSS1500 |
| cg26392367 | 17 | 17,566,891  | 1.72E-11 | 0.278 | 0.275 |          |       |  |     |                |         |
| cg23901852 | 4  | 126,238,384 | 0.001165 | 0.278 | 0.290 |          |       |  |     | <i>FAT4</i>    | 1stExon |
| cg07459252 | 14 | 37,130,212  | 0.000143 | 0.278 | 0.287 |          |       |  |     | <i>PAX9</i>    | 5'UTR   |
| cg14976276 | 6  | 31,830,630  | 0.019159 | 0.278 | 0.241 | 4.46E-15 | 0.236 |  |     | <i>NEU1</i>    | 5'UTR   |
| cg03679755 | 10 | 101,875,035 | 0.002338 | 0.278 | 0.302 |          |       |  |     |                |         |
| cg10582860 | 2  | 55,347,991  | 5.74E-15 | 0.278 | 0.274 |          |       |  |     |                |         |
| cg11680055 | 1  | 110,230,252 | 1.2E-05  | 0.278 | 0.282 |          |       |  |     | <i>GSTM1</i>   | TSS200  |
| cg18927077 | 14 | 103,605,358 | 0.000111 | 0.278 | 0.227 |          |       |  |     |                |         |
| cg25426302 | 6  | 32,120,826  | 0.000713 | 0.278 | 0.289 | 3.65E-22 | 0.246 |  |     | <i>PPT2</i>    | TSS1500 |
| cg09030672 | 16 | 67,197,150  | 3.94E-05 | 0.278 | 0.326 |          |       |  |     | <i>HSF4</i>    | TSS200  |
| cg16142306 | 4  | 41,258,935  | 1.52E-06 | 0.278 | 0.262 |          |       |  |     | <i>UCHL1</i>   | 1stExon |
| cg18311871 | 7  | 157,754,600 | 2.11E-07 | 0.278 | 0.214 |          |       |  |     | <i>PTPRN2</i>  | Body    |
| cg07145284 | 11 | 66,084,631  | 8.94E-05 | 0.278 | 0.229 |          |       |  |     | <i>CD248</i>   | TSS200  |
| cg11367159 | 12 | 110,044,531 | 0.010046 | 0.278 | 0.284 |          |       |  |     |                |         |
| cg24942922 | 3  | 120,003,547 | 2.21E-07 | 0.278 | 0.232 |          |       |  |     |                |         |
| cg26544072 | 6  | 29,795,992  | 0.021235 | 0.278 | 0.246 |          |       |  |     | <i>HLA-G</i>   | Body    |
| cg04396791 | 11 | 70,508,180  | 2.88E-09 | 0.278 | 0.276 | 1.76E-18 | 0.244 |  |     | <i>SHANK2</i>  | Body    |
| cg13762691 | 22 | 17,956,560  | 2.57E-12 | 0.278 | 0.239 |          |       |  |     | <i>CECR2</i>   | TSS200  |
| cg20432671 | 1  | 167,682,922 | 3.15E-07 | 0.278 | 0.258 |          |       |  |     |                |         |
| cg14242557 | 9  | 114,288,341 | 2.06E-05 | 0.278 | 0.186 |          |       |  | Yes | <i>ZNF483</i>  | 5'UTR   |
| cg06783737 | 6  | 26,752,689  | 0.001387 | 0.278 | 0.245 |          |       |  |     |                |         |

|            |    |             |          |       |       |  |  |  |                 |         |
|------------|----|-------------|----------|-------|-------|--|--|--|-----------------|---------|
| cg18154567 | 15 | 51,464,013  | 8.15E-20 | 0.278 | 0.261 |  |  |  |                 |         |
| cg22930859 | 14 | 78,108,189  | 4.33E-07 | 0.278 | 0.301 |  |  |  |                 |         |
| cg00765686 | X  | 17,545,806  | 3.06E-05 | 0.278 | 0.178 |  |  |  | <i>NHS</i>      | Body    |
| cg03669282 | 1  | 228,566,718 | 0.01778  | 0.278 | 0.316 |  |  |  |                 |         |
| cg18825119 | 6  | 163,149,453 | 3.25E-13 | 0.278 | 0.232 |  |  |  | <i>PACRG</i>    | Body    |
| cg04562138 | 1  | 53,966,412  | 1.71E-07 | 0.278 | 0.174 |  |  |  |                 |         |
| cg16565031 | 14 | 70,186,289  | 5.49E-16 | 0.278 | 0.256 |  |  |  |                 |         |
| cg02447879 | 17 | 79,393,682  | 0.000289 | 0.278 | 0.113 |  |  |  | <i>BAHCC1</i>   | Body    |
| cg05890377 | 2  | 74,357,713  | 0.001476 | 0.278 | 0.315 |  |  |  |                 |         |
| cg01903654 | 5  | 139,225,955 | 1.01E-12 | 0.278 | 0.288 |  |  |  |                 |         |
| cg27582007 | 1  | 167,682,788 | 5.61E-07 | 0.278 | 0.256 |  |  |  |                 |         |
| cg00541718 | 7  | 630,823     | 6.36E-10 | 0.278 | 0.252 |  |  |  | <i>PRKAR1B</i>  | Body    |
| cg02125316 | 5  | 170,878,209 | 3.28E-34 | 0.278 | 0.276 |  |  |  | <i>FGF18</i>    | Body    |
| cg02629106 | 2  | 120,302,419 | 0.001071 | 0.278 | 0.291 |  |  |  | <i>PCDP1</i>    | 5'UTR   |
| cg05027533 | 2  | 153,290,479 | 1.19E-10 | 0.278 | 0.285 |  |  |  | <i>FMNL2</i>    | Body    |
| cg01382864 | 2  | 220,174,251 | 7.79E-06 | 0.278 | 0.308 |  |  |  | <i>PTPRN</i>    | TSS200  |
| cg02643782 | 3  | 14,853,225  | 1.45E-16 | 0.278 | 0.262 |  |  |  |                 |         |
| cg06993307 | 16 | 54,969,051  | 0.000966 | 0.278 | 0.347 |  |  |  |                 |         |
| cg08602008 | 19 | 48,076,841  | 3.92E-08 | 0.278 | 0.279 |  |  |  |                 |         |
| cg25830182 | 4  | 85,417,077  | 0.017973 | 0.278 | 0.344 |  |  |  | <i>NKX6-1</i>   | Body    |
| cg03883228 | 11 | 68,778,570  | 8.35E-06 | 0.278 | 0.234 |  |  |  | <i>MRGPRF</i>   | 5'UTR   |
| cg18016826 | 5  | 176,560,001 | 1.24E-05 | 0.278 | 0.250 |  |  |  | <i>NSD1</i>     | TSS200  |
| cg26155697 | 5  | 52,150,386  | 7.29E-15 | 0.278 | 0.288 |  |  |  | <i>ITGA1</i>    | Body    |
| cg24714905 | 13 | 100,637,241 | 0.000407 | 0.278 | 0.227 |  |  |  | <i>ZIC2</i>     | Body    |
| cg01739354 | 6  | 170,481,630 | 0.00014  | 0.278 | 0.212 |  |  |  |                 |         |
| cg25610702 | 6  | 43,276,744  | 0.011043 | 0.278 | 0.234 |  |  |  | <i>CRIP3</i>    | TSS1500 |
| cg13972124 | 9  | 132,539,744 | 2.46E-05 | 0.278 | 0.283 |  |  |  |                 |         |
| cg11078221 | 12 | 115,135,934 | 1.76E-08 | 0.278 | 0.261 |  |  |  |                 |         |
| cg11551216 | 12 | 115,125,619 | 8.78E-05 | 0.278 | 0.283 |  |  |  |                 |         |
| cg06015781 | 11 | 119,613,693 | 3.39E-07 | 0.278 | 0.298 |  |  |  |                 |         |
| cg14207728 | 1  | 67,217,886  | 0.003497 | 0.278 | 0.265 |  |  |  | <i>TCTEX1D1</i> | TSS1500 |
| cg06468454 | 17 | 3,591,377   | 9.52E-08 | 0.278 | 0.256 |  |  |  | <i>P2RX5</i>    | Body    |
| cg26279840 | X  | 153,770,418 | 2.64E-09 | 0.278 | 0.251 |  |  |  | <i>IKBK</i>     | TSS200  |
| cg07541701 | 12 | 54,389,934  | 1.21E-07 | 0.278 | 0.206 |  |  |  |                 |         |

|            |    |             |          |       |       |          |       |     |                     |         |  |
|------------|----|-------------|----------|-------|-------|----------|-------|-----|---------------------|---------|--|
| cg25503903 | 3  | 138,679,512 | 0.00156  | 0.278 | 0.284 |          |       |     |                     |         |  |
| cg03989273 | 5  | 133,468,435 | 0.007025 | 0.278 | 0.240 |          |       |     | <i>TCF7</i>         | Body    |  |
| cg05797224 | 1  | 94,277,532  | 1.2E-13  | 0.278 | 0.285 |          |       |     |                     |         |  |
| cg16071681 | 18 | 19,925,575  | 1.18E-06 | 0.278 | 0.232 |          |       |     |                     |         |  |
| cg21237418 | 17 | 27,045,043  | 1.77E-06 | 0.278 | 0.252 | 7.41E-27 | 0.205 |     | <i>RAB34</i>        | TSS200  |  |
| cg14276286 | 11 | 111,782,364 | 2.15E-11 | 0.278 | 0.303 |          |       |     | <i>HSPB2</i>        | TSS1500 |  |
| cg24336398 | 9  | 139,236,777 | 2.73E-13 | 0.278 | 0.274 |          |       |     | <i>GPSM1</i>        | Body    |  |
| cg24452128 | 6  | 10,390,919  | 0.000867 | 0.278 | 0.317 |          |       |     |                     |         |  |
| cg02700891 | 3  | 129,693,586 | 0.00375  | 0.278 | 0.339 |          |       |     | <i>TRH</i>          | 5'UTR   |  |
| cg26149244 | 17 | 80,329,964  | 0.026486 | 0.278 | 0.353 |          |       |     |                     |         |  |
| cg14586373 | 22 | 37,447,398  | 3.2E-07  | 0.278 | 0.200 |          |       |     | <i>KCTD17</i>       | TSS1500 |  |
| cg24030587 | 8  | 122,653,639 | 0.000416 | 0.278 | 0.329 |          |       |     | <i>HAS2</i>         | TSS200  |  |
| cg03957885 | 10 | 89,855,267  | 2.34E-09 | 0.278 | 0.246 |          |       |     |                     |         |  |
| cg26115633 | 10 | 129,535,893 | 9.06E-11 | 0.278 | 0.237 |          |       |     | <i>FOXI2</i>        | 1stExon |  |
| cg04086531 | 16 | 49,732,376  | 9.8E-12  | 0.278 | 0.295 |          |       |     | <i>ZNF423</i>       | Body    |  |
| cg09220326 | 3  | 45,175,421  | 2.28E-14 | 0.278 | 0.264 |          |       | Yes | <i>CDCP1</i>        | Body    |  |
| cg11866303 | 19 | 40,732,691  | 0.005128 | 0.278 | 0.119 |          |       |     | <i>CNTD2</i>        | TSS200  |  |
| cg15396367 | 9  | 139,972,779 | 0.005478 | 0.278 | 0.168 | 3.01E-11 | 0.168 |     | <i>UAP1L1</i>       | Body    |  |
| cg00740822 | 19 | 49,939,611  | 0.00326  | 0.278 | 0.349 |          |       |     | <i>SLC17A7</i>      | Body    |  |
| cg10009830 | X  | 20,134,904  | 0.004638 | 0.278 | 0.253 | 1.39E-17 | 0.245 |     | <i>MAP7D2</i>       | TSS200  |  |
| cg03611487 | 11 | 19,737,237  | 0.000116 | 0.277 | 0.290 |          |       |     | <i>LOC100126784</i> | TSS1500 |  |
| cg05275576 | 11 | 130,523,347 | 2.8E-08  | 0.277 | 0.257 |          |       |     |                     |         |  |
| cg16006349 | 12 | 54,360,460  | 5.54E-12 | 0.277 | 0.264 |          |       |     | <i>HOTAIR</i>       | Body    |  |
| cg05673966 | 16 | 85,431,095  | 3.46E-15 | 0.277 | 0.253 |          |       |     |                     |         |  |
| cg06454951 | X  | 15,683,334  | 3.1E-05  | 0.277 | 0.239 |          |       |     | <i>TMEM27</i>       | TSS200  |  |
| cg05987154 | X  | 3,264,853   | 0.020248 | 0.277 | 0.133 |          |       |     | <i>MXRA5</i>        | TSS200  |  |
| cg08901098 | 17 | 66,255,244  | 0.000368 | 0.277 | 0.278 |          |       |     | <i>ARSG</i>         | TSS200  |  |
| cg15309006 | 16 | 23,766,116  | 0.000978 | 0.277 | 0.325 | 3.09E-27 | 0.260 |     | <i>CHP2</i>         | 1stExon |  |
| cg24227984 | 19 | 4,474,970   | 2.97E-24 | 0.277 | 0.288 |          |       |     | <i>HDGF2</i>        | Body    |  |
| cg22304612 | 20 | 2,781,241   | 3.48E-05 | 0.277 | 0.212 |          |       |     | <i>CPXM1</i>        | 5'UTR   |  |
| cg02093112 | 17 | 6,679,495   | 0.001827 | 0.277 | 0.257 |          |       |     | <i>FBXO39</i>       | TSS200  |  |
| cg17975443 | 17 | 59,534,998  | 4.21E-05 | 0.277 | 0.288 |          |       |     | <i>TBX4</i>         | Body    |  |
| cg09446908 | 22 | 19,512,320  | 0.005473 | 0.277 | 0.326 |          |       |     | <i>CLDN5</i>        | 1stExon |  |
| cg02454595 | 15 | 45,406,534  | 0.001642 | 0.277 | 0.263 |          |       |     | <i>DUOXA2</i>       | 1stExon |  |

|            |    |             |          |       |       |  |  |  |                     |         |
|------------|----|-------------|----------|-------|-------|--|--|--|---------------------|---------|
| cg15079885 | 1  | 32,041,940  | 7.3E-07  | 0.277 | 0.188 |  |  |  | <i>TINAGL1</i>      | TSS200  |
| cg23415212 | 17 | 37,331,429  | 0.007131 | 0.277 | 0.373 |  |  |  | <i>CACNB1</i>       | 3'UTR   |
| cg27467383 | 22 | 38,073,472  | 0.003384 | 0.277 | 0.247 |  |  |  | <i>LGALS1</i>       | Body    |
| cg00018606 | 2  | 208,989,425 | 1.4E-07  | 0.277 | 0.261 |  |  |  | <i>CRYGD</i>        | TSS200  |
| cg00016913 | 17 | 27,369,892  | 9.42E-10 | 0.277 | 0.250 |  |  |  | <i>PIPOX</i>        | TSS200  |
| cg13461890 | 9  | 4,793,992   | 8.84E-16 | 0.277 | 0.249 |  |  |  | <i>RCL1</i>         | Body    |
| cg01481989 | 2  | 183,731,169 | 0.001527 | 0.277 | 0.205 |  |  |  | <i>FRZB</i>         | 1stExon |
| cg00683788 | 20 | 1,974,878   | 2.78E-06 | 0.277 | 0.286 |  |  |  | <i>PDYN</i>         | TSS200  |
| cg17611647 | 17 | 75,260,857  | 8.57E-19 | 0.277 | 0.273 |  |  |  |                     |         |
| cg21141329 | 17 | 48,290,459  | 4.83E-08 | 0.277 | 0.301 |  |  |  |                     |         |
| cg06212637 | 16 | 67,184,953  | 0.045953 | 0.277 | 0.135 |  |  |  | <i>B3GNT9</i>       | TSS200  |
| cg16303353 | 12 | 2,393,684   | 3.27E-15 | 0.277 | 0.246 |  |  |  | <i>CACNA1C</i>      | Body    |
| cg14688962 | 17 | 66,596,275  | 9.26E-08 | 0.277 | 0.248 |  |  |  | <i>FAM20A</i>       | Body    |
| cg21192063 | 7  | 150,948,686 | 0.000533 | 0.277 | 0.163 |  |  |  | <i>SMARCD3</i>      | Body    |
| cg01019875 | 17 | 6,945,620   | 0.011917 | 0.277 | 0.239 |  |  |  | <i>SLC16A11</i>     | Body    |
| cg23837799 | 15 | 31,684,836  | 0.002261 | 0.277 | 0.300 |  |  |  |                     |         |
| cg00348762 | 16 | 56,228,114  | 0.000299 | 0.277 | 0.206 |  |  |  | <i>DKFZP434H168</i> | Body    |
| cg15544654 | 1  | 197,882,295 | 0.001391 | 0.277 | 0.276 |  |  |  | <i>LHX9</i>         | Body    |
| cg25797887 | 7  | 96,627,821  | 0.000308 | 0.277 | 0.319 |  |  |  | <i>DLX6AS</i>       | Body    |
| cg17670496 | 6  | 29,759,972  | 0.001224 | 0.277 | 0.306 |  |  |  | <i>HCG4</i>         | Body    |
| cg27017658 | 14 | 21,093,081  | 8.28E-05 | 0.277 | 0.266 |  |  |  |                     |         |
| cg27207079 | 9  | 123,656,751 | 4.61E-15 | 0.277 | 0.269 |  |  |  |                     |         |
| cg24631482 | 2  | 42,329,446  | 1.48E-05 | 0.277 | 0.278 |  |  |  |                     |         |
| cg10715265 | 1  | 58,715,499  | 0.009891 | 0.277 | 0.263 |  |  |  | <i>DAB1</i>         | 5'UTR   |
| cg01045132 | 19 | 11,649,571  | 8.59E-08 | 0.277 | 0.286 |  |  |  | <i>CNN1</i>         | TSS200  |
| cg07235253 | 7  | 99,156,031  | 0.000188 | 0.277 | 0.223 |  |  |  | <i>ZNF655</i>       | TSS200  |
| cg18705279 | 16 | 67,197,129  | 9.49E-05 | 0.277 | 0.317 |  |  |  | <i>HSF4</i>         | TSS200  |
| cg26407571 | 12 | 54,473,534  | 1.32E-48 | 0.277 | 0.254 |  |  |  | <i>FLJ12825</i>     | Body    |
| cg16868298 | 7  | 120,969,033 | 1.78E-05 | 0.277 | 0.245 |  |  |  | <i>WNT16</i>        | TSS200  |
| cg01145903 | 5  | 115,697,588 | 2.89E-09 | 0.277 | 0.273 |  |  |  |                     |         |
| cg05626738 | 19 | 53,238,413  | 0.000789 | 0.277 | 0.301 |  |  |  | <i>ZNF611</i>       | TSS200  |
| cg21185686 | 5  | 140,810,433 | 0.000881 | 0.277 | 0.308 |  |  |  | <i>PCDHGA4</i>      | Body    |
| cg16374663 | 15 | 41,805,031  | 0.000278 | 0.277 | 0.382 |  |  |  | <i>LTK</i>          | Body    |
| cg02639108 | 2  | 242,711,009 | 1.44E-12 | 0.277 | 0.278 |  |  |  |                     |         |

|            |    |             |          |       |       |          |       |  |                 |         |
|------------|----|-------------|----------|-------|-------|----------|-------|--|-----------------|---------|
| cg17757602 | 5  | 42,952,113  | 0.000446 | 0.277 | 0.272 |          |       |  |                 |         |
| cg04164058 | 15 | 89,949,694  | 7.23E-05 | 0.277 | 0.315 |          |       |  |                 |         |
| cg13717434 | 9  | 97,854,044  | 1.05E-10 | 0.277 | 0.247 |          |       |  |                 |         |
| cg12377701 | X  | 75,648,992  | 0.029762 | 0.277 | 0.228 |          |       |  | <i>MAGEE1</i>   | 1stExon |
| cg23786625 | 10 | 106,402,741 | 0.00131  | 0.277 | 0.220 |          |       |  | <i>SORCS3</i>   | Body    |
| cg26677394 | 6  | 46,258,880  | 2.51E-11 | 0.277 | 0.303 |          |       |  | <i>RCAN2</i>    | Body    |
| cg25958283 | 18 | 11,752,089  | 0.042115 | 0.277 | 0.406 |          |       |  | <i>GNAL</i>     | 5'UTR   |
| cg02961707 | 19 | 7,927,974   | 3.83E-07 | 0.277 | 0.271 |          |       |  | <i>EVI5L</i>    | Body    |
| cg07694025 | 4  | 154,709,441 | 0.002927 | 0.277 | 0.271 | 7.71E-10 | 0.122 |  | <i>SFRP2</i>    | Body    |
| cg12999366 | 7  | 30,499,283  | 9.18E-09 | 0.277 | 0.292 |          |       |  | <i>NOD1</i>     | 5'UTR   |
| cg18724430 | 15 | 89,951,787  | 1.16E-05 | 0.277 | 0.230 |          |       |  |                 |         |
| cg20325921 | 8  | 142,368,332 | 1.19E-56 | 0.277 | 0.278 |          |       |  | <i>GPR20</i>    | 5'UTR   |
| cg11918450 | 2  | 33,359,198  | 1.2E-08  | 0.277 | 0.230 |          |       |  | <i>LTBP1</i>    | Body    |
| cg23414876 | 16 | 67,197,396  | 2.37E-06 | 0.277 | 0.311 |          |       |  | <i>HSF4</i>     | 5'UTR   |
| cg05954411 | 6  | 28,521,811  | 0.000128 | 0.277 | 0.254 |          |       |  |                 |         |
| cg18337222 | 3  | 99,595,254  | 8.71E-13 | 0.277 | 0.285 |          |       |  | <i>C3orf26</i>  | Body    |
| cg23542075 | 8  | 91,952,780  | 2.58E-09 | 0.277 | 0.285 |          |       |  | <i>NECAB1</i>   | Body    |
| cg03950476 | 1  | 53,019,814  | 3.65E-12 | 0.277 | 0.238 |          |       |  | <i>ZCCHC11</i>  | TSS1500 |
| cg07368069 | 12 | 107,631,018 | 6.64E-07 | 0.277 | 0.272 |          |       |  |                 |         |
| cg21406402 | 2  | 121,223,847 | 6.5E-06  | 0.277 | 0.225 |          |       |  | <i>LOC84931</i> | Body    |
| cg13518992 | 18 | 55,109,119  | 0.007388 | 0.277 | 0.299 |          |       |  | <i>ONECUT2</i>  | Body    |
| cg01720742 | 1  | 22,351,395  | 0.037982 | 0.277 | 0.281 |          |       |  | <i>HSPC157</i>  | TSS1500 |
| cg27550270 | 6  | 117,086,996 | 5.56E-06 | 0.277 | 0.200 |          |       |  | <i>FAM162B</i>  | TSS200  |
| cg03218396 | 8  | 96,377,380  | 2.08E-06 | 0.277 | 0.209 |          |       |  |                 |         |
| cg03577944 | X  | 106,694,654 | 9.86E-08 | 0.277 | 0.235 |          |       |  |                 |         |
| cg03593578 | 2  | 45,028,225  | 1.57E-09 | 0.277 | 0.279 |          |       |  |                 |         |
| cg08151292 | 20 | 3,758,189   | 0.002729 | 0.277 | 0.091 |          |       |  | <i>SPEF1</i>    | 3'UTR   |
| cg25629790 | 1  | 53,527,412  | 6.1E-18  | 0.277 | 0.249 |          |       |  | <i>PODN</i>     | TSS1500 |
| cg19446165 | 17 | 185,756     | 1.31E-08 | 0.277 | 0.256 |          |       |  | <i>RPH3AL</i>   | 5'UTR   |
| cg24723331 | 12 | 22,487,219  | 2.91E-05 | 0.277 | 0.265 | 9.04E-20 | 0.179 |  | <i>ST8SIA1</i>  | 5'UTR   |
| cg14689338 | 5  | 16,742,054  | 3.47E-28 | 0.277 | 0.271 |          |       |  | <i>MYO10</i>    | Body    |
| cg21292033 | 17 | 75,462,189  | 3.51E-09 | 0.277 | 0.270 |          |       |  | <i>SEPT9</i>    | Body    |
| cg17203063 | 12 | 75,601,711  | 0.005397 | 0.277 | 0.265 |          |       |  | <i>KCNC2</i>    | Body    |
| cg26477573 | 19 | 15,342,915  | 0.006631 | 0.277 | 0.293 |          |       |  | <i>EPHX3</i>    | 1stExon |

|            |    |             |          |       |       |  |  |  |                 |         |
|------------|----|-------------|----------|-------|-------|--|--|--|-----------------|---------|
| cg00807464 | 12 | 111,618,977 | 0.016957 | 0.277 | 0.150 |  |  |  | <i>CUX2</i>     | Body    |
| cg00866870 | 7  | 107,579,250 | 4.82E-08 | 0.277 | 0.285 |  |  |  | <i>LAMB1</i>    | Body    |
| cg01033205 | 8  | 107,876,626 | 0.000563 | 0.277 | 0.195 |  |  |  |                 |         |
| cg01344273 | 4  | 110,223,040 | 3.97E-14 | 0.277 | 0.278 |  |  |  | <i>COL25A1</i>  | Body    |
| cg05193470 | 8  | 135,469,552 | 0.011743 | 0.277 | 0.188 |  |  |  |                 |         |
| cg04832767 | 7  | 96,632,841  | 0.01063  | 0.277 | 0.274 |  |  |  | <i>DLX6AS</i>   | Body    |
| cg08857310 | 17 | 75,567,635  | 0.000117 | 0.277 | 0.203 |  |  |  |                 |         |
| cg27649239 | 15 | 68,120,393  | 3.5E-05  | 0.277 | 0.287 |  |  |  | <i>LBXCOR1</i>  | Body    |
| cg18339788 | 19 | 41,641,434  | 1.04E-05 | 0.277 | 0.264 |  |  |  |                 |         |
| cg26582733 | 17 | 47,547,707  | 1.69E-05 | 0.277 | 0.312 |  |  |  |                 |         |
| cg06786219 | 3  | 124,499,653 | 0.002506 | 0.277 | 0.182 |  |  |  | <i>ITGB5</i>    | Body    |
| cg12085570 | 19 | 8,674,501   | 0.001725 | 0.277 | 0.348 |  |  |  | <i>ADAMTS10</i> | 5'UTR   |
| cg19138538 | 11 | 60,623,415  | 2.36E-15 | 0.277 | 0.250 |  |  |  | <i>GPR44</i>    | 5'UTR   |
| cg11455444 | 2  | 121,223,947 | 1.83E-09 | 0.277 | 0.220 |  |  |  | <i>LOC84931</i> | TSS200  |
| cg26767632 | 19 | 46,526,508  | 4.52E-15 | 0.277 | 0.257 |  |  |  | <i>PGLYRP1</i>  | TSS200  |
| cg04452432 | 16 | 57,406,511  | 2.23E-15 | 0.276 | 0.275 |  |  |  | <i>CX3CL1</i>   | 1stExon |
| cg00059374 | 17 | 21,477,756  | 3.5E-07  | 0.276 | 0.241 |  |  |  |                 |         |
| cg18818866 | 12 | 50,221,061  | 1.67E-20 | 0.276 | 0.261 |  |  |  | <i>NCKAP5L</i>  | 5'UTR   |
| cg03257341 | 12 | 49,375,499  | 0.023325 | 0.276 | 0.369 |  |  |  | <i>WNT1</i>     | 3'UTR   |
| cg08036309 | 4  | 13,536,991  | 1.76E-06 | 0.276 | 0.339 |  |  |  |                 |         |
| cg14468692 | 11 | 504,784     | 0.00056  | 0.276 | 0.214 |  |  |  | <i>RNH1</i>     | 5'UTR   |
| cg17306747 | 5  | 1,446,165   | 2.87E-06 | 0.276 | 0.230 |  |  |  | <i>SLC6A3</i>   | TSS1500 |
| cg11248896 | 2  | 177,003,747 | 1.41E-07 | 0.276 | 0.226 |  |  |  |                 |         |
| cg04912843 | 1  | 78,511,856  | 0.000272 | 0.276 | 0.307 |  |  |  | <i>GIPC2</i>    | 1stExon |
| cg13279774 | X  | 102,632,528 | 1.04E-13 | 0.276 | 0.257 |  |  |  | <i>NGFRAP1</i>  | Body    |
| cg21117734 | 20 | 9,489,749   | 9.7E-09  | 0.276 | 0.250 |  |  |  |                 |         |
| cg19153763 | 7  | 27,196,371  | 1.5E-08  | 0.276 | 0.271 |  |  |  | <i>HOXA7</i>    | TSS200  |
| cg21902772 | 3  | 25,468,324  | 1.56E-13 | 0.276 | 0.240 |  |  |  | <i>RARB</i>     | TSS1500 |
| cg20312971 | 14 | 79,746,780  | 0.001319 | 0.276 | 0.275 |  |  |  | <i>NRXN3</i>    | Body    |
| cg13481132 | 9  | 138,606,811 | 0.004228 | 0.276 | 0.203 |  |  |  | <i>KCNT1</i>    | Body    |
| cg08248285 | 14 | 35,182,889  | 2.73E-06 | 0.276 | 0.182 |  |  |  | <i>CFL2</i>     | 1stExon |
| cg26865446 | 3  | 181,438,328 | 2.21E-07 | 0.276 | 0.261 |  |  |  | <i>SOX2OT</i>   | Body    |
| cg03352287 | 1  | 152,488,262 | 0.030559 | 0.276 | 0.272 |  |  |  | <i>CRCT1</i>    | 3'UTR   |
| cg10181330 | 6  | 29,818,243  | 0.00166  | 0.276 | 0.367 |  |  |  |                 |         |

|            |    |             |          |       |       |          |       |     |                  |         |
|------------|----|-------------|----------|-------|-------|----------|-------|-----|------------------|---------|
| cg22955387 | X  | 133,680,468 | 0.004089 | 0.276 | 0.182 |          |       |     | <i>MGC16121</i>  | Body    |
| cg04954111 | 11 | 34,363,786  | 2.4E-11  | 0.276 | 0.233 |          |       |     | <i>ABTB2</i>     | Body    |
| cg18063495 | 5  | 50,262,796  | 0.00508  | 0.276 | 0.299 |          |       |     |                  |         |
| cg18167466 | 1  | 6,390,473   | 2.71E-24 | 0.276 | 0.269 |          |       |     | <i>ACOT7</i>     | Body    |
| cg05112555 | 17 | 71,739,385  | 2.19E-05 | 0.276 | 0.223 |          |       |     |                  |         |
| cg09370982 | 16 | 2,547,559   | 3.32E-07 | 0.276 | 0.236 |          |       |     | <i>TBC1D24</i>   | Body    |
| cg19966212 | 5  | 149,792,783 | 0.003484 | 0.276 | 0.103 |          |       |     | <i>CD74</i>      | TSS1500 |
| cg03225093 | 5  | 2,008,713   | 4.81E-06 | 0.276 | 0.288 |          |       |     |                  |         |
| cg19789505 | 1  | 228,394,509 | 6.24E-07 | 0.276 | 0.215 | 2.76E-21 | 0.128 |     | <i>OBSCN</i>     | TSS1500 |
| cg20649663 | 2  | 197,112,771 | 6.26E-12 | 0.276 | 0.246 |          |       |     | <i>HECW2</i>     | Body    |
| cg05921579 | 17 | 61,776,513  | 1.63E-11 | 0.276 | 0.216 |          |       |     | <i>LIMD2</i>     | Body    |
| cg20582655 | 1  | 156,390,237 | 0.000417 | 0.276 | 0.296 |          |       |     | <i>MIR9-1</i>    | TSS200  |
| cg03027800 | 17 | 7,651,017   | 4.42E-05 | 0.276 | 0.315 |          |       |     | <i>DNAH2</i>     | Body    |
| cg18588323 | 15 | 51,385,891  | 1.78E-08 | 0.276 | 0.269 |          |       |     | <i>TNFAIP8L3</i> | Body    |
| cg05882680 | 17 | 48,042,605  | 0.000229 | 0.276 | 0.342 |          |       |     |                  |         |
| cg11948905 | 5  | 53,920,730  | 1.53E-06 | 0.276 | 0.263 |          |       | Yes |                  |         |
| cg02710296 | 1  | 182,921,851 | 0.004136 | 0.276 | 0.196 |          |       |     | <i>C1orf14</i>   | Body    |
| cg07600533 | 22 | 50,986,031  | 3.11E-05 | 0.276 | 0.281 |          |       |     | <i>KLHDC7B</i>   | TSS1500 |
| cg08278741 | 19 | 36,736,477  | 0.002035 | 0.276 | 0.254 |          |       |     |                  |         |
| cg14613540 | 18 | 61,616,369  | 0.01909  | 0.276 | 0.299 |          |       |     | <i>HMSD</i>      | TSS1500 |
| cg08227526 | 4  | 155,663,529 | 0.004665 | 0.276 | 0.321 |          |       |     |                  |         |
| cg06505273 | 16 | 24,850,292  | 1.17E-06 | 0.276 | 0.288 |          |       |     |                  |         |
| cg06486093 | 19 | 51,875,986  | 2.92E-05 | 0.276 | 0.254 |          |       |     | <i>NKG7</i>      | TSS200  |
| cg17562247 | X  | 119,443,277 | 0.03199  | 0.276 | 0.283 |          |       |     | <i>FAM70A</i>    | Body    |
| cg21233688 | 5  | 134,880,353 | 1.07E-07 | 0.276 | 0.274 |          |       |     |                  |         |
| cg02032125 | 14 | 101,000,186 | 2.59E-12 | 0.276 | 0.262 |          |       |     |                  |         |
| cg14983728 | 22 | 35,695,234  | 8.15E-15 | 0.276 | 0.231 |          |       |     | <i>TOM1</i>      | TSS1500 |
| cg19654743 | 17 | 75,446,592  | 0.000257 | 0.276 | 0.175 |          |       |     | <i>SEPT9</i>     | TSS200  |
| cg24395710 | 3  | 58,163,815  | 0.019815 | 0.276 | 0.226 |          |       |     |                  |         |
| cg02200207 | 7  | 29,605,237  | 1.43E-14 | 0.276 | 0.264 |          |       |     | <i>PRR15</i>     | 5'UTR   |
| cg08747277 | 6  | 96,048,126  | 1.19E-16 | 0.276 | 0.275 |          |       |     | <i>MANEA</i>     | Body    |
| cg22720790 | 19 | 58,716,032  | 1.76E-16 | 0.276 | 0.266 |          |       |     | <i>ZNF274</i>    | Body    |
| cg19456540 | 14 | 60,976,285  | 0.00493  | 0.276 | 0.216 | 6.39E-23 | 0.238 |     | <i>SIX6</i>      | 1stExon |
| cg04115680 | 7  | 75,889,229  | 0.026016 | 0.276 | 0.281 |          |       |     | <i>SRRM3</i>     | Body    |

|            |    |             |          |       |       |          |       |     |                  |         |
|------------|----|-------------|----------|-------|-------|----------|-------|-----|------------------|---------|
| cg14555996 | 9  | 86,785,905  | 1.57E-09 | 0.276 | 0.304 |          |       |     |                  |         |
| cg02679012 | 17 | 773,283     | 0.000265 | 0.276 | 0.263 |          |       |     | <i>NXN</i>       | Body    |
| cg07061260 | 16 | 68,676,557  | 7.62E-07 | 0.276 | 0.256 |          |       |     |                  |         |
| cg15347342 | 6  | 108,490,485 | 3.08E-09 | 0.276 | 0.272 |          |       |     | <i>NR2E1</i>     | Body    |
| cg23224142 | 8  | 37,082,537  | 2.86E-09 | 0.276 | 0.279 |          |       |     |                  |         |
| cg26253438 | 1  | 203,598,623 | 0.016698 | 0.276 | 0.225 |          |       |     | <i>ATP2B4</i>    | 5'UTR   |
| cg16175263 | 8  | 22,960,385  | 0.002013 | 0.276 | 0.208 | 2.05E-19 | 0.193 |     | <i>TNFRSF10C</i> | TSS200  |
| cg01404317 | 13 | 36,919,819  | 0.025986 | 0.276 | 0.336 |          |       |     | <i>SPG20</i>     | 5'UTR   |
| cg06160973 | 12 | 57,522,813  | 0.049998 | 0.276 | 0.117 |          |       |     | <i>LRP1</i>      | 1stExon |
| cg22490134 | 10 | 22,624,847  | 0.001145 | 0.276 | 0.336 |          |       |     |                  |         |
| cg06952416 | 5  | 142,781,736 | 0.011897 | 0.276 | 0.205 |          |       |     | <i>NR3C1</i>     | 5'UTR   |
| cg15936446 | 5  | 42,952,369  | 1.67E-05 | 0.276 | 0.246 |          |       |     |                  |         |
| cg06953130 | 10 | 11,912,410  | 1.01E-18 | 0.276 | 0.247 |          |       |     | <i>C10orf47</i>  | 3'UTR   |
| cg25923450 | 3  | 159,944,518 | 0.000492 | 0.276 | 0.145 |          |       |     | <i>LOC401097</i> | 3'UTR   |
| cg05987823 | 12 | 54,428,592  | 1.24E-33 | 0.276 | 0.257 |          |       |     | <i>HOXC4</i>     | 5'UTR   |
| cg00158528 | 7  | 121,956,859 | 0.00791  | 0.276 | 0.358 |          |       |     |                  |         |
| cg04053798 | 12 | 47,219,705  | 4.87E-07 | 0.276 | 0.235 |          |       |     | <i>SLC38A4</i>   | 1stExon |
| cg01412762 | 2  | 29,751,968  | 4.98E-05 | 0.276 | 0.257 |          |       |     | <i>ALK</i>       | Body    |
| cg18781966 | 19 | 51,523,159  | 1.06E-13 | 0.276 | 0.271 |          |       |     | <i>KLK10</i>     | 5'UTR   |
| cg21237687 | 17 | 6,899,380   | 1.14E-08 | 0.276 | 0.204 |          |       |     | <i>ALOX12</i>    | TSS200  |
| cg00210994 | 3  | 99,594,893  | 0.037827 | 0.276 | 0.363 |          |       |     | <i>C3orf26</i>   | Body    |
| cg16171281 | 18 | 73,167,422  | 0.049291 | 0.276 | 0.074 |          |       |     |                  |         |
| cg18320111 | 18 | 9,400,501   | 8.92E-16 | 0.276 | 0.297 |          |       |     | <i>TWSG1</i>     | 3'UTR   |
| cg09556826 | 6  | 28,956,259  | 6.57E-05 | 0.276 | 0.281 |          |       |     |                  |         |
| cg01533258 | 14 | 95,235,489  | 0.000616 | 0.276 | 0.309 |          |       |     | <i>GSC</i>       | Body    |
| cg13941760 | 2  | 198,063,781 | 2.95E-06 | 0.276 | 0.209 |          |       |     | <i>ANKRD44</i>   | TSS1500 |
| cg15883716 | 1  | 173,638,701 | 0.001647 | 0.276 | 0.202 | 2.53E-13 | 0.141 |     | <i>ANKRD45</i>   | 5'UTR   |
| cg21108215 | 1  | 183,791,720 | 4.98E-19 | 0.276 | 0.282 |          |       |     | <i>RGL1</i>      | Body    |
| cg15085603 | 19 | 49,250,252  | 3.91E-06 | 0.276 | 0.279 |          |       |     | <i>IZUMO1</i>    | TSS200  |
| cg16426714 | 17 | 77,773,042  | 0.048127 | 0.276 | 0.202 |          |       |     |                  |         |
| cg12287785 | 6  | 99,295,470  | 1.31E-14 | 0.276 | 0.240 |          |       |     |                  |         |
| cg13305793 | 1  | 210,517,139 | 1.21E-05 | 0.276 | 0.174 |          |       | Yes | <i>HHAT</i>      | 5'UTR   |
| cg26718213 | 2  | 241,976,080 | 1.81E-11 | 0.276 | 0.244 |          |       |     | <i>SNED1</i>     | Body    |
| cg17265419 | 2  | 182,321,489 | 5.19E-11 | 0.276 | 0.239 |          |       |     | <i>ITGA4</i>     | TSS200  |



|            |    |             |          |       |       |          |       |  |         |         |
|------------|----|-------------|----------|-------|-------|----------|-------|--|---------|---------|
| cg25115537 | 8  | 123,801,352 | 0.003682 | 0.276 | 0.171 |          |       |  | ZHX2    | 5'UTR   |
| cg00095018 | 6  | 36,101,338  | 8.68E-10 | 0.276 | 0.235 |          |       |  | MAPK13  | Body    |
| cg11859607 | 18 | 909,154     | 0.000225 | 0.276 | 0.273 |          |       |  | ADCYAP1 | Body    |
| cg21383487 | 10 | 22,624,094  | 5.6E-05  | 0.276 | 0.330 |          |       |  |         |         |
| cg26723045 | 11 | 9,042,581   | 1.83E-12 | 0.276 | 0.269 |          |       |  | SCUBE2  | 3'UTR   |
| cg18283386 | 8  | 11,561,728  | 0.015177 | 0.276 | 0.276 |          |       |  | GATA4   | 1stExon |
| cg08498833 | 8  | 134,003,896 | 4.75E-10 | 0.276 | 0.282 |          |       |  | TG      | Body    |
| cg13786863 | 11 | 68,610,743  | 1.62E-06 | 0.276 | 0.271 |          |       |  | CPT1A   | TSS1500 |
| cg02728483 | 2  | 172,965,081 | 4.54E-05 | 0.276 | 0.262 |          |       |  | DLX2    | 3'UTR   |
| cg08055087 | 6  | 7,107,129   | 0.002546 | 0.276 | 0.184 |          |       |  | RREB1   | TSS1500 |
| cg19056772 | 17 | 7,341,616   | 0.003382 | 0.276 | 0.283 |          |       |  | FGF11   | TSS1500 |
| cg08939481 | 14 | 21,494,269  | 0.00011  | 0.276 | 0.274 |          |       |  | NDRG2   | TSS1500 |
| cg25249539 | 20 | 56,803,358  | 9.07E-16 | 0.276 | 0.282 |          |       |  |         |         |
| cg07551545 | 19 | 39,466,313  | 0.036589 | 0.276 | 0.399 |          |       |  | FBXO17  | 5'UTR   |
| cg16573374 | 2  | 97,761,334  | 2.36E-05 | 0.276 | 0.203 |          |       |  | FAHD2B  | TSS1500 |
| cg18456459 | 18 | 9,707,753   | 4.63E-06 | 0.276 | 0.271 |          |       |  | RAB31   | TSS1500 |
| cg09717261 | 20 | 35,579,347  | 0.00732  | 0.276 | 0.099 |          |       |  | SAMHD1  | Body    |
| cg20824989 | 2  | 208,491,939 | 1.96E-06 | 0.276 | 0.277 |          |       |  |         |         |
| cg14637919 | 2  | 227,288,327 | 0.003626 | 0.275 | 0.240 |          |       |  |         |         |
| cg18584067 | 2  | 64,975,916  | 1.41E-07 | 0.275 | 0.298 |          |       |  |         |         |
| cg26853640 | 19 | 38,879,673  | 0.000396 | 0.275 | 0.224 | 1.22E-25 | 0.147 |  | SPRED3  | TSS1500 |
| cg10137231 | 14 | 24,641,021  | 2.84E-14 | 0.275 | 0.281 |          |       |  | REC8    | TSS1500 |
| cg18205770 | 5  | 87,439,353  | 0.001333 | 0.275 | 0.272 |          |       |  |         |         |
| cg23058405 | 3  | 105,072,537 | 2.51E-13 | 0.275 | 0.272 |          |       |  |         |         |
| cg12176783 | 20 | 62,694,000  | 4.71E-12 | 0.275 | 0.257 |          |       |  | TCEA2   | TSS200  |
| cg19645639 | 1  | 113,500,384 | 0.000473 | 0.275 | 0.169 |          |       |  | SLC16A1 | TSS1500 |
| cg21497990 | 7  | 155,255,122 | 0.000624 | 0.275 | 0.281 |          |       |  | EN2     | Body    |
| cg16291276 | 1  | 208,084,071 | 0.000543 | 0.275 | 0.246 |          |       |  | CD34    | Body    |
| cg09182533 | 11 | 63,775,071  | 0.045377 | 0.275 | 0.246 |          |       |  | MACROD1 | Body    |
| cg22660370 | 8  | 64,132,778  | 1.86E-05 | 0.275 | 0.240 |          |       |  |         |         |
| cg25281029 | 12 | 88,969,462  | 1.68E-06 | 0.275 | 0.311 |          |       |  | KITLG   | Body    |
| cg00107488 | 22 | 19,930,437  | 0.015072 | 0.275 | 0.202 |          |       |  | COMT    | 5'UTR   |
| cg14590331 | 9  | 138,782,572 | 2.64E-14 | 0.275 | 0.235 |          |       |  | CAMSAP1 | Body    |
| cg02501410 | 3  | 143,255,785 | 4.72E-15 | 0.275 | 0.239 |          |       |  | SLC9A9  | Body    |

|            |    |             |          |       |       |          |       |  |                  |         |
|------------|----|-------------|----------|-------|-------|----------|-------|--|------------------|---------|
| cg08081805 | 19 | 49,242,953  | 0.011783 | 0.275 | 0.275 |          |       |  | <i>RASIP1</i>    | Body    |
| cg13054419 | 13 | 31,438,929  | 1.77E-09 | 0.275 | 0.298 |          |       |  |                  |         |
| cg04995717 | 9  | 27,109,293  | 7.34E-17 | 0.275 | 0.267 | 3.46E-15 | 0.136 |  | <i>TEK</i>       | 5'UTR   |
| cg11832404 | 12 | 65,218,258  | 0.015356 | 0.275 | 0.060 |          |       |  |                  |         |
| cg07068761 | 14 | 77,505,182  | 4.48E-15 | 0.275 | 0.273 |          |       |  |                  |         |
| cg24313303 | 1  | 27,113,219  | 3.49E-07 | 0.275 | 0.265 |          |       |  | <i>PIGV</i>      | TSS1500 |
| cg01264106 | 22 | 38,071,602  | 1.86E-06 | 0.275 | 0.305 |          |       |  | <i>LGALS1</i>    | TSS200  |
| cg01809281 | 2  | 24,162,256  | 4.74E-17 | 0.275 | 0.279 |          |       |  | <i>UBXN2A</i>    | TSS1500 |
| cg06307153 | X  | 134,429,853 | 4.36E-07 | 0.275 | 0.267 |          |       |  | <i>ZNF75D</i>    | 5'UTR   |
| cg20705321 | 19 | 10,958,970  | 1.86E-11 | 0.275 | 0.262 |          |       |  | <i>C19orf38</i>  | TSS200  |
| cg00399175 | 2  | 26,395,448  | 0.002264 | 0.275 | 0.168 |          |       |  | <i>FAM59B</i>    | TSS1500 |
| cg07329360 | 11 | 31,841,768  | 2.85E-05 | 0.275 | 0.283 |          |       |  |                  |         |
| cg08070022 | 3  | 101,497,478 | 0.000178 | 0.275 | 0.189 |          |       |  | <i>FAM55C</i>    | TSS1500 |
| cg20216139 | 11 | 16,632,509  | 0.000149 | 0.275 | 0.259 |          |       |  |                  |         |
| cg21358336 | 17 | 6,558,440   | 2.36E-05 | 0.275 | 0.275 |          |       |  |                  |         |
| cg07185131 | 2  | 62,798,365  | 0.006656 | 0.275 | 0.272 |          |       |  |                  |         |
| cg04100595 | 12 | 27,615,138  | 3.17E-05 | 0.275 | 0.305 |          |       |  |                  |         |
| cg20152309 | 10 | 36,054,255  | 0.004547 | 0.275 | 0.310 |          |       |  |                  |         |
| cg11833001 | 3  | 14,852,756  | 0.008948 | 0.275 | 0.313 |          |       |  |                  |         |
| cg08924554 | 4  | 57,976,775  | 0.013049 | 0.275 | 0.314 |          |       |  | <i>IGFBP7</i>    | TSS1500 |
| cg21883598 | 15 | 45,404,157  | 0.000621 | 0.275 | 0.315 |          |       |  | <i>DUOX2</i>     | Body    |
| cg00927554 | 12 | 95,941,920  | 5.29E-05 | 0.275 | 0.228 |          |       |  | <i>USP44</i>     | 5'UTR   |
| cg03367387 | 3  | 197,439,334 | 2.18E-07 | 0.275 | 0.239 |          |       |  | <i>KIAA0226</i>  | Body    |
| cg25316749 | 11 | 111,169,284 | 1.56E-14 | 0.275 | 0.292 |          |       |  | <i>C11orf93</i>  | TSS1500 |
| cg02599464 | 6  | 27,107,097  | 8.94E-06 | 0.275 | 0.256 | 6.09E-20 | 0.189 |  | <i>HIST1H2BK</i> | 3'UTR   |
| cg03142586 | 19 | 58,220,080  | 0.008386 | 0.275 | 0.186 |          |       |  | <i>ZNF154</i>    | Body    |
| cg09375033 | 3  | 137,833,634 | 1.17E-13 | 0.275 | 0.221 |          |       |  | <i>DZIP1L</i>    | 5'UTR   |
| cg16448058 | 10 | 102,880,841 | 0.018644 | 0.275 | 0.322 |          |       |  | <i>TLX1NB</i>    | 5'UTR   |
| cg05158538 | 4  | 23,891,486  | 0.004836 | 0.275 | 0.307 | 2.01E-07 | 0.144 |  | <i>PPARGC1A</i>  | Body    |
| cg23771603 | 10 | 26,223,310  | 0.007728 | 0.275 | 0.329 | 1.84E-19 | 0.265 |  | <i>MYO3A</i>     | 5'UTR   |
| cg03724964 | 19 | 39,465,969  | 0.007146 | 0.275 | 0.301 |          |       |  | <i>FBXO17</i>    | 5'UTR   |
| cg04246763 | 1  | 87,617,811  | 0.01363  | 0.275 | 0.272 |          |       |  | <i>LOC339524</i> | Body    |
| cg02159731 | 11 | 119,613,405 | 8.78E-05 | 0.275 | 0.244 |          |       |  |                  |         |
| cg09227563 | 19 | 54,984,705  | 0.00033  | 0.275 | 0.257 | 4.1E-22  | 0.197 |  | <i>CDC42EP5</i>  | TSS1500 |

|            |    |             |          |       |       |          |       |  |                 |         |
|------------|----|-------------|----------|-------|-------|----------|-------|--|-----------------|---------|
| cg24105287 | 2  | 66,809,985  | 1.86E-07 | 0.275 | 0.260 |          |       |  |                 |         |
| cg13211683 | 8  | 97,171,827  | 0.024778 | 0.275 | 0.391 |          |       |  | <i>GDF6</i>     | Body    |
| cg06710648 | 1  | 58,716,377  | 3.09E-11 | 0.275 | 0.228 | 2.94E-16 | 0.192 |  | <i>DAB1</i>     | TSS200  |
| cg01454215 | 2  | 27,530,363  | 0.003671 | 0.275 | 0.304 |          |       |  | <i>UCN</i>      | 3'UTR   |
| cg01415937 | 1  | 10,134,620  | 1.91E-08 | 0.275 | 0.233 |          |       |  | <i>UBE4B</i>    | Body    |
| cg14375937 | 10 | 94,825,667  | 0.000447 | 0.275 | 0.158 |          |       |  | <i>CYP26C1</i>  | Body    |
| cg00653790 | 15 | 78,031,418  | 0.000218 | 0.275 | 0.282 |          |       |  |                 |         |
| cg08773462 | 16 | 17,107,610  | 6.76E-05 | 0.275 | 0.261 |          |       |  |                 |         |
| cg12640469 | 1  | 53,067,717  | 5.98E-08 | 0.275 | 0.266 |          |       |  | <i>GPX7</i>     | TSS1500 |
| cg18767278 | 5  | 1,119,025   | 1.25E-17 | 0.275 | 0.264 |          |       |  |                 |         |
| cg16489259 | 10 | 32,438,418  | 1.55E-05 | 0.275 | 0.288 |          |       |  |                 |         |
| cg10048349 | 11 | 111,783,267 | 0.000007 | 0.275 | 0.334 |          |       |  | <i>CRYAB</i>    | TSS1500 |
| cg12467264 | 5  | 175,200,071 | 0.001048 | 0.275 | 0.226 |          |       |  |                 |         |
| cg18721420 | 19 | 15,121,913  | 8.75E-05 | 0.275 | 0.217 |          |       |  | <i>CCDC105</i>  | 1stExon |
| cg17991823 | 18 | 12,254,473  | 0.021877 | 0.275 | 0.239 |          |       |  | <i>CIDEA</i>    | Body    |
| cg22810423 | 1  | 200,272,180 | 3.06E-08 | 0.275 | 0.263 |          |       |  |                 |         |
| cg25032094 | 17 | 73,583,839  | 0.000116 | 0.275 | 0.267 |          |       |  | <i>MYO15B</i>   | TSS1500 |
| cg27132335 | 8  | 74,002,760  | 0.000187 | 0.275 | 0.203 |          |       |  | <i>C8orf84</i>  | Body    |
| cg02094252 | 10 | 102,807,849 | 1.72E-05 | 0.275 | 0.258 |          |       |  |                 |         |
| cg08508431 | 17 | 13,319,838  | 3.48E-05 | 0.275 | 0.252 |          |       |  |                 |         |
| cg08900404 | 7  | 29,605,808  | 8.22E-12 | 0.275 | 0.266 |          |       |  | <i>PRR15</i>    | 5'UTR   |
| cg26377000 | 17 | 33,814,891  | 6.14E-06 | 0.275 | 0.240 |          |       |  | <i>SLFN12L</i>  | Body    |
| cg15938050 | 17 | 68,984,117  | 3.09E-05 | 0.275 | 0.261 |          |       |  |                 |         |
| cg03694713 | 8  | 23,564,156  | 0.002706 | 0.275 | 0.308 |          |       |  | <i>NKX2-6</i>   | TSS1500 |
| cg05376617 | 2  | 237,145,141 | 0.001053 | 0.275 | 0.234 |          |       |  | <i>ASB18</i>    | Body    |
| cg09354380 | 6  | 106,258,324 | 2.71E-10 | 0.275 | 0.290 |          |       |  |                 |         |
| cg14538537 | 12 | 6,939,048   | 6.74E-14 | 0.275 | 0.254 |          |       |  | <i>LEPREL2</i>  | Body    |
| cg18235734 | 1  | 91,301,731  | 0.000116 | 0.275 | 0.298 |          |       |  |                 |         |
| cg20312077 | 8  | 327,768     | 6.04E-11 | 0.275 | 0.242 |          |       |  |                 |         |
| cg16842053 | 7  | 3,083,333   | 0.025421 | 0.275 | 0.407 |          |       |  | <i>CARD11</i>   | 1stExon |
| cg19942495 | 17 | 32,484,027  | 4.96E-07 | 0.275 | 0.287 |          |       |  | <i>ACCN1</i>    | TSS1500 |
| cg03231735 | 16 | 9,184,099   | 1.04E-06 | 0.275 | 0.214 |          |       |  | <i>C16orf72</i> | TSS1500 |
| cg04024827 | 12 | 54,454,163  | 4.76E-08 | 0.275 | 0.218 |          |       |  | <i>FLJ12825</i> | Body    |
| cg07589393 | 7  | 26,984,305  | 7.96E-16 | 0.275 | 0.284 |          |       |  |                 |         |

|            |    |             |          |       |       |  |  |  |                 |         |
|------------|----|-------------|----------|-------|-------|--|--|--|-----------------|---------|
| cg18327056 | 2  | 26,915,355  | 0.00506  | 0.275 | 0.164 |  |  |  | <i>KCNK3</i>    | TSS1500 |
| cg05185926 | 5  | 142,602,110 | 2.16E-12 | 0.275 | 0.244 |  |  |  | <i>ARHGAP26</i> | 3'UTR   |
| cg13833923 | 14 | 79,746,627  | 0.000126 | 0.275 | 0.240 |  |  |  | <i>NRXN3</i>    | Body    |
| cg09983897 | 16 | 31,483,285  | 0.029455 | 0.275 | 0.114 |  |  |  | <i>TGFB111</i>  | TSS1500 |
| cg01606023 | 12 | 57,613,744  | 1.56E-14 | 0.275 | 0.256 |  |  |  | <i>NXPH4</i>    | Body    |
| cg02634222 | 1  | 41,944,775  | 4.63E-09 | 0.275 | 0.241 |  |  |  | <i>EDN2</i>     | 3'UTR   |
| cg23514936 | 7  | 20,838,523  | 0.001709 | 0.275 | 0.223 |  |  |  |                 |         |
| cg14409810 | 9  | 140,172,908 | 1.27E-06 | 0.275 | 0.248 |  |  |  | <i>C9orf167</i> | 5'UTR   |
| cg04311496 | 1  | 67,773,719  | 0.001412 | 0.275 | 0.140 |  |  |  | <i>IL12RB2</i>  | 5'UTR   |
| cg03169508 | 6  | 28,557,901  | 1.33E-06 | 0.275 | 0.265 |  |  |  |                 |         |
| cg07124687 | 6  | 28,956,332  | 5.01E-05 | 0.275 | 0.273 |  |  |  |                 |         |
| cg03207151 | 12 | 54,442,288  | 9.82E-07 | 0.275 | 0.201 |  |  |  | <i>HOXC4</i>    | 5'UTR   |
| cg20072171 | 3  | 62,356,962  | 0.036929 | 0.275 | 0.230 |  |  |  | <i>FEZF2</i>    | Body    |
| cg24306982 | 1  | 119,549,312 | 2.53E-05 | 0.275 | 0.335 |  |  |  |                 |         |
| cg24810735 | 8  | 108,441,547 | 3.84E-08 | 0.275 | 0.292 |  |  |  | <i>ANGPT1</i>   | Body    |
| cg14014796 | 2  | 45,029,977  | 0.037168 | 0.275 | 0.220 |  |  |  |                 |         |
| cg23440058 | 3  | 124,103,696 | 1.57E-09 | 0.275 | 0.264 |  |  |  | <i>KALRN</i>    | Body    |
| cg20328588 | 11 | 117,747,934 | 1.03E-12 | 0.275 | 0.205 |  |  |  | <i>FXD6</i>     | 5'UTR   |
| cg24947764 | 4  | 41,881,359  | 0.002989 | 0.275 | 0.278 |  |  |  |                 |         |
| cg15000966 | 17 | 73,128,123  | 0.00024  | 0.275 | 0.258 |  |  |  | <i>NT5C</i>     | TSS1500 |
| cg02918577 | 15 | 93,633,145  | 2.33E-07 | 0.275 | 0.265 |  |  |  | <i>RGMA</i>     | TSS1500 |
| cg09831105 | 12 | 99,287,469  | 7.72E-07 | 0.275 | 0.238 |  |  |  | <i>ANKS1B</i>   | Body    |
| cg07693238 | 7  | 99,595,437  | 0.002898 | 0.275 | 0.292 |  |  |  |                 |         |
| cg25113157 | 12 | 111,537,104 | 1.01E-10 | 0.275 | 0.260 |  |  |  | <i>CUX2</i>     | Body    |
| cg01563704 | 6  | 26,271,816  | 0.026437 | 0.274 | 0.304 |  |  |  | <i>HIST1H3G</i> | TSS1500 |
| cg06528645 | 1  | 119,534,088 | 0.000264 | 0.274 | 0.346 |  |  |  |                 |         |
| cg17214455 | 6  | 32,977,138  | 3.6E-17  | 0.274 | 0.272 |  |  |  | <i>HLA-DOA</i>  | Body    |
| cg04020309 | 1  | 247,496,094 | 0.017203 | 0.274 | 0.148 |  |  |  | <i>ZNF496</i>   | TSS1500 |
| cg20979921 | 22 | 37,584,018  | 0.023857 | 0.274 | 0.172 |  |  |  | <i>C1QTNF6</i>  | Body    |
| cg06745511 | 4  | 10,585,774  | 2.24E-06 | 0.274 | 0.250 |  |  |  | <i>CLNK</i>     | Body    |
| cg15135047 | 3  | 72,149,514  | 0.004016 | 0.274 | 0.347 |  |  |  |                 |         |
| cg23767994 | 7  | 96,621,323  | 5.3E-09  | 0.274 | 0.280 |  |  |  | <i>DLX6AS</i>   | Body    |
| cg04453471 | 10 | 30,726,531  | 0.000171 | 0.274 | 0.210 |  |  |  | <i>MAP3K8</i>   | 5'UTR   |
| cg14631386 | 8  | 93,114,305  | 0.000116 | 0.274 | 0.321 |  |  |  |                 |         |

|            |    |             |          |       |       |          |       |  |                 |         |
|------------|----|-------------|----------|-------|-------|----------|-------|--|-----------------|---------|
| cg02010481 | 7  | 28,218,524  | 1.75E-05 | 0.274 | 0.286 |          |       |  | <i>JAZF1</i>    | Body    |
| cg03811629 | 5  | 139,176,077 | 1.17E-09 | 0.274 | 0.254 |          |       |  | <i>PSD2</i>     | 5'UTR   |
| cg07197230 | 22 | 17,956,641  | 6.14E-20 | 0.274 | 0.246 |          |       |  | <i>CECR2</i>    | 1stExon |
| cg07884255 | 7  | 33,804,562  | 9.12E-07 | 0.274 | 0.304 |          |       |  |                 |         |
| cg15339231 | 7  | 96,650,407  | 2.39E-06 | 0.274 | 0.269 |          |       |  | <i>DLX5</i>     | Body    |
| cg14970515 | 17 | 77,816,034  | 7.32E-10 | 0.274 | 0.253 |          |       |  |                 |         |
| cg08538034 | 1  | 14,928,945  | 1.27E-09 | 0.274 | 0.281 |          |       |  | <i>KIAA1026</i> | Body    |
| cg27204474 | X  | 130,191,834 | 1.17E-05 | 0.274 | 0.220 |          |       |  | <i>FLJ30058</i> | TSS1500 |
| cg00951972 | 3  | 186,490,777 | 9.19E-06 | 0.274 | 0.263 |          |       |  |                 |         |
| cg08572565 | 14 | 51,298,737  | 3.02E-06 | 0.274 | 0.280 |          |       |  | <i>NIN</i>      | TSS1500 |
| cg18771553 | 19 | 6,710,827   | 8.98E-05 | 0.274 | 0.337 |          |       |  | <i>C3</i>       | Body    |
| cg26329715 | 20 | 61,583,987  | 1.32E-05 | 0.274 | 0.297 |          |       |  | <i>SLC17A9</i>  | TSS200  |
| cg06481122 | 15 | 37,403,088  | 0.002675 | 0.274 | 0.271 |          |       |  |                 |         |
| cg11743528 | 1  | 218,339,560 | 0.0021   | 0.274 | 0.320 |          |       |  |                 |         |
| cg12502577 | 12 | 57,615,581  | 1.61E-08 | 0.274 | 0.269 |          |       |  | <i>NXPH4</i>    | Body    |
| cg08696931 | 12 | 123,754,071 | 0.000653 | 0.274 | 0.138 |          |       |  | <i>CDK2AP1</i>  | Body    |
| cg24981058 | 11 | 89,224,736  | 8.53E-06 | 0.274 | 0.317 |          |       |  | <i>NOX4</i>     | 5'UTR   |
| cg02205739 | 9  | 132,427,570 | 7.91E-05 | 0.274 | 0.210 | 6.54E-26 | 0.159 |  | <i>PRRX2</i>    | TSS1500 |
| cg06271652 | 16 | 23,144,103  | 1.72E-09 | 0.274 | 0.283 |          |       |  | <i>USP31</i>    | Body    |
| cg10203211 | 4  | 185,018,682 | 0.009551 | 0.274 | 0.244 |          |       |  | <i>ENPP6</i>    | Body    |
| cg02556634 | 4  | 6,449,000   | 1.86E-09 | 0.274 | 0.273 |          |       |  | <i>PPP2R2C</i>  | Body    |
| cg22925274 | 14 | 71,288,210  | 1.59E-10 | 0.274 | 0.235 |          |       |  |                 |         |
| cg11660146 | 11 | 120,110,688 | 0.038251 | 0.274 | 0.197 |          |       |  | <i>POU2F3</i>   | TSS1500 |
| cg02878244 | 11 | 20,181,911  | 0.013204 | 0.274 | 0.315 |          |       |  | <i>DBX1</i>     | TSS200  |
| cg06868100 | 7  | 29,606,349  | 1.1E-09  | 0.274 | 0.259 |          |       |  | <i>PRR15</i>    | 3'UTR   |
| cg20430047 | 20 | 20,257,861  | 0.000407 | 0.274 | 0.199 |          |       |  | <i>C20orf26</i> | Body    |
| cg06719900 | 11 | 109,292,894 | 0.000275 | 0.274 | 0.316 |          |       |  | <i>C11orf87</i> | 5'UTR   |
| cg22762844 | 2  | 95,692,424  | 0.004504 | 0.274 | 0.194 |          |       |  | <i>MAL</i>      | Body    |
| cg23090603 | 17 | 855,187     | 7.94E-12 | 0.274 | 0.245 |          |       |  | <i>NXN</i>      | Body    |
| cg09798536 | 6  | 28,457,348  | 0.003406 | 0.274 | 0.248 |          |       |  |                 |         |
| cg19884658 | 1  | 6,664,268   | 7.2E-16  | 0.274 | 0.268 | 2.48E-16 | 0.206 |  | <i>KLHL21</i>   | TSS1500 |
| cg05133437 | 15 | 40,729,033  | 0.001941 | 0.274 | 0.258 |          |       |  |                 |         |
| cg27234090 | 11 | 119,251,854 | 0.008449 | 0.274 | 0.118 | 2.84E-13 | 0.176 |  | <i>USP2</i>     | 5'UTR   |
| cg10519140 | 6  | 44,187,076  | 0.005268 | 0.274 | 0.191 | 1.2E-15  | 0.172 |  | <i>SLC29A1</i>  | TSS200  |

|            |    |             |          |       |       |          |       |     |                  |         |
|------------|----|-------------|----------|-------|-------|----------|-------|-----|------------------|---------|
| cg26517376 | 10 | 126,428,818 | 2.48E-12 | 0.274 | 0.252 |          |       |     | <i>FAM53B</i>    | 5'UTR   |
| cg17862152 | 1  | 203,044,930 | 0.004417 | 0.274 | 0.156 |          |       |     | <i>PPFIA4</i>    | Body    |
| cg08545129 | 7  | 117,854,304 | 4.15E-05 | 0.274 | 0.230 |          |       |     |                  |         |
| cg13519035 | 12 | 34,261,006  | 5.49E-08 | 0.274 | 0.236 |          |       |     |                  |         |
| cg18592447 | 3  | 32,857,857  | 0.001539 | 0.274 | 0.287 |          |       |     |                  |         |
| cg27122213 | 14 | 57,274,763  | 0.027745 | 0.274 | 0.321 |          |       |     | <i>OTX2</i>      | 5'UTR   |
| cg20615910 | 6  | 11,607,923  | 1.41E-20 | 0.274 | 0.268 |          |       |     |                  |         |
| cg02516419 | 12 | 47,771,422  | 2.17E-11 | 0.274 | 0.283 |          |       |     |                  |         |
| cg01020696 | 2  | 27,958,142  | 3.1E-05  | 0.274 | 0.208 |          |       |     |                  |         |
| cg03393769 | 2  | 54,611,906  | 0.000607 | 0.274 | 0.245 |          |       | Yes |                  |         |
| cg14577707 | 4  | 184,797,463 | 2.2E-05  | 0.274 | 0.265 |          |       |     |                  |         |
| cg13149442 | 18 | 43,303,777  | 1.12E-14 | 0.274 | 0.261 |          |       |     | <i>SLC14A1</i>   | TSS1500 |
| cg19776616 | 7  | 129,425,330 | 3.81E-06 | 0.274 | 0.283 |          |       |     |                  |         |
| cg04357965 | 5  | 77,945,347  | 0.000102 | 0.274 | 0.209 |          |       |     | <i>LHFPL2</i>    | TSS1500 |
| cg19697239 | 12 | 752,646     | 3.19E-05 | 0.274 | 0.218 |          |       |     | <i>NINJ2</i>     | Body    |
| cg21960624 | 19 | 35,085,474  | 1.28E-10 | 0.274 | 0.271 |          |       |     | <i>SCGBL</i>     | 1stExon |
| cg18891712 | 6  | 76,059,576  | 0.044855 | 0.274 | 0.183 |          |       |     | <i>FILIP1</i>    | Body    |
| cg13038216 | 15 | 33,487,120  | 0.020276 | 0.274 | 0.176 |          |       |     |                  |         |
| cg12650635 | 12 | 50,344,463  | 1.38E-18 | 0.274 | 0.255 | 5.03E-14 | 0.088 |     | <i>AQP2</i>      | TSS200  |
| cg04059568 | 7  | 157,486,012 | 2.22E-05 | 0.274 | 0.302 |          |       |     | <i>PTPRN2</i>    | Body    |
| cg17093485 | 1  | 149,294,708 | 0.007282 | 0.274 | 0.403 |          |       |     |                  |         |
| cg21051519 | 5  | 137,225,191 | 0.040015 | 0.274 | 0.186 |          |       |     | <i>PKD2L2</i>    | 1stExon |
| cg21550483 | 17 | 6,984,106   | 2.32E-05 | 0.274 | 0.233 | 2.37E-18 | 0.223 |     | <i>CLEC10A</i>   | TSS1500 |
| cg23999932 | 4  | 54,976,184  | 5.67E-09 | 0.274 | 0.275 |          |       |     |                  |         |
| cg07144296 | 1  | 182,584,520 | 0.025787 | 0.274 | 0.172 |          |       |     |                  |         |
| cg13115683 | 6  | 29,943,460  | 3.09E-06 | 0.274 | 0.277 |          |       |     | <i>HCG9</i>      | Body    |
| cg12144100 | 7  | 157,890,277 | 4.32E-10 | 0.274 | 0.250 |          |       |     | <i>PTPRN2</i>    | Body    |
| cg11676189 | 2  | 69,875,470  | 2.77E-17 | 0.274 | 0.259 |          |       |     |                  |         |
| cg12374123 | 15 | 45,406,327  | 5.88E-05 | 0.274 | 0.267 |          |       |     | <i>DUOX2</i>     | 5'UTR   |
| cg13437581 | 18 | 44,777,799  | 0.001761 | 0.274 | 0.251 |          |       |     |                  |         |
| cg05764238 | 1  | 16,536,990  | 5.08E-10 | 0.274 | 0.278 |          |       |     | <i>ARHGEF19</i>  | 5'UTR   |
| cg09164580 | 8  | 97,157,878  | 1.13E-05 | 0.274 | 0.253 |          |       |     | <i>GDF6</i>      | Body    |
| cg14550519 | 17 | 58,180,026  | 1.37E-05 | 0.274 | 0.248 |          |       |     | <i>LOC653653</i> | Body    |
| cg24484138 | 20 | 31,070,190  | 5.38E-05 | 0.274 | 0.203 |          |       |     | <i>C20orf112</i> | 5'UTR   |

|            |    |             |          |       |       |  |  |  |                  |         |
|------------|----|-------------|----------|-------|-------|--|--|--|------------------|---------|
| cg02315489 | 2  | 24,398,859  | 4.25E-12 | 0.274 | 0.279 |  |  |  | <i>C2orf84</i>   | Body    |
| cg04364728 | 1  | 845,810     | 3.31E-06 | 0.274 | 0.262 |  |  |  |                  |         |
| cg07350470 | 4  | 4,765,329   | 2.5E-07  | 0.274 | 0.251 |  |  |  |                  |         |
| cg09240763 | 2  | 200,330,851 | 1.19E-06 | 0.274 | 0.272 |  |  |  |                  |         |
| cg22172038 | 1  | 231,176,991 | 1.25E-05 | 0.274 | 0.214 |  |  |  | <i>FAM89A</i>    | TSS1500 |
| cg18201679 | 1  | 149,672,149 | 5.34E-08 | 0.274 | 0.259 |  |  |  |                  |         |
| cg04169747 | Y  | 2,655,740   | 1.35E-05 | 0.274 | 0.306 |  |  |  | <i>SRY</i>       | 5'UTR   |
| cg11660879 | 19 | 13,319,417  | 2.96E-06 | 0.274 | 0.256 |  |  |  | <i>CACNA1A</i>   | Body    |
| cg13729210 | 5  | 3,606,561   | 1.13E-07 | 0.274 | 0.276 |  |  |  |                  |         |
| cg16670554 | 15 | 68,118,985  | 0.000473 | 0.274 | 0.299 |  |  |  | <i>LBXCOR1</i>   | Body    |
| cg12858577 | 17 | 75,385,278  | 7.8E-07  | 0.274 | 0.301 |  |  |  | <i>SEPT9</i>     | 5'UTR   |
| cg18372930 | 5  | 137,939,469 | 2.89E-12 | 0.274 | 0.282 |  |  |  |                  |         |
| cg02544037 | 12 | 68,759,069  | 0.000877 | 0.274 | 0.205 |  |  |  |                  |         |
| cg13735819 | 19 | 2,253,850   | 1.29E-10 | 0.274 | 0.270 |  |  |  | <i>JSRP1</i>     | Body    |
| cg25928819 | 12 | 133,484,026 | 1.35E-05 | 0.274 | 0.270 |  |  |  |                  |         |
| cg12744859 | 17 | 46,669,492  | 5.84E-14 | 0.274 | 0.260 |  |  |  | <i>LOC404266</i> | TSS200  |
| cg16758598 | 4  | 106,729,791 | 1.39E-16 | 0.274 | 0.264 |  |  |  | <i>GSTCD</i>     | Body    |
| cg05336698 | 10 | 102,497,298 | 0.02819  | 0.274 | 0.240 |  |  |  |                  |         |
| cg01804193 | 12 | 63,026,212  | 0.006191 | 0.274 | 0.205 |  |  |  |                  |         |
| cg08286219 | 21 | 38,580,802  | 2.56E-18 | 0.274 | 0.268 |  |  |  | <i>DSCR9</i>     | TSS200  |
| cg00307214 | 14 | 69,726,319  | 0.010566 | 0.274 | 0.127 |  |  |  | <i>GALNTL1</i>   | TSS1500 |
| cg20820107 | 1  | 12,193,099  | 0.000371 | 0.274 | 0.176 |  |  |  | <i>TNFRSF8</i>   | 5'UTR   |
| cg10189135 | 16 | 67,516,162  | 1.7E-18  | 0.273 | 0.238 |  |  |  | <i>ATP6V0D1</i>  | TSS1500 |
| cg19448822 | 6  | 29,974,773  | 1.83E-10 | 0.273 | 0.262 |  |  |  | <i>HLA-J</i>     | Body    |
| cg27339550 | 7  | 6,654,880   | 0.000873 | 0.273 | 0.259 |  |  |  | <i>ZNF853</i>    | TSS1500 |
| cg19270505 | 1  | 25,256,705  | 0.044552 | 0.273 | 0.242 |  |  |  | <i>RUNX3</i>     | 1stExon |
| cg01521258 | 1  | 64,937,528  | 0.000123 | 0.273 | 0.260 |  |  |  | <i>CACHD1</i>    | Body    |
| cg05817845 | 20 | 42,816,226  | 2.41E-07 | 0.273 | 0.235 |  |  |  | <i>JPH2</i>      | TSS200  |
| cg09667289 | 15 | 33,165,563  | 0.043314 | 0.273 | 0.167 |  |  |  | <i>FMN1</i>      | Body    |
| cg06726820 | 3  | 139,259,742 | 1.58E-12 | 0.273 | 0.246 |  |  |  | <i>RBP1</i>      | TSS1500 |
| cg01808736 | 5  | 219,908     | 2.62E-15 | 0.273 | 0.260 |  |  |  | <i>SDHA</i>      | Body    |
| cg12260798 | 6  | 26,240,519  | 0.000838 | 0.273 | 0.282 |  |  |  | <i>HIST1H4F</i>  | TSS200  |
| cg23667127 | 12 | 1,739,917   | 1.05E-08 | 0.273 | 0.254 |  |  |  | <i>WNT5B</i>     | 5'UTR   |
| cg25283465 | 1  | 111,323,341 | 0.000216 | 0.273 | 0.291 |  |  |  |                  |         |

|            |    |             |          |       |       |            |       |  |                  |         |
|------------|----|-------------|----------|-------|-------|------------|-------|--|------------------|---------|
| cg00324725 | 16 | 56,581,212  | 3.84E-10 | 0.273 | 0.250 |            |       |  |                  |         |
| cg21962450 | 18 | 24,444,196  | 4.85E-10 | 0.273 | 0.269 |            |       |  | <i>AQP4</i>      | Body    |
| cg22274813 | 21 | 38,067,101  | 0.007413 | 0.273 | 0.305 |            |       |  |                  |         |
| cg03697809 | X  | 106,750,775 | 3.06E-07 | 0.273 | 0.250 |            |       |  |                  |         |
| cg26348226 | 1  | 21,617,442  | 4.98E-07 | 0.273 | 0.211 |            |       |  | <i>ECE1</i>      | TSS1500 |
| cg15200418 | 7  | 4,755,010   | 2.27E-17 | 0.273 | 0.247 |            |       |  | <i>FOXK1</i>     | Body    |
| cg10764101 | 2  | 241,374,174 | 4.95E-07 | 0.273 | 0.234 |            |       |  | <i>GPC1</i>      | TSS1500 |
| cg18110483 | 5  | 79,330,959  | 5.32E-06 | 0.273 | 0.225 | 8.05E-08   | 0.147 |  | <i>THBS4</i>     | TSS200  |
| cg07576175 | 19 | 59,049,843  | 0.021694 | 0.273 | 0.317 |            |       |  |                  |         |
| cg00705059 | 1  | 244,080,368 | 9.31E-05 | 0.273 | 0.194 |            |       |  |                  |         |
| cg12991050 | 5  | 87,979,504  | 0.00061  | 0.273 | 0.305 |            |       |  | <i>LOC645323</i> | Body    |
| cg13493766 | 9  | 97,365,869  | 0.013946 | 0.273 | 0.183 |            |       |  | <i>FBP1</i>      | Body    |
| cg17980508 | 1  | 79,085,713  | 0.000694 | 0.273 | 0.221 | 0.00000452 | 0.102 |  | <i>IFI44L</i>    | TSS1500 |
| cg03562044 | 19 | 15,342,749  | 0.032796 | 0.273 | 0.269 |            |       |  | <i>EPHX3</i>     | Body    |
| cg09086442 | 6  | 168,079,212 | 0.000205 | 0.273 | 0.202 |            |       |  |                  |         |
| cg26824216 | 3  | 187,086,147 | 0.016344 | 0.273 | 0.087 |            |       |  | <i>RTP4</i>      | TSS200  |
| cg03573446 | 20 | 55,841,893  | 0.020685 | 0.273 | 0.153 |            |       |  | <i>BMP7</i>      | TSS200  |
| cg15385139 | 6  | 29,595,506  | 6.53E-05 | 0.273 | 0.238 |            |       |  | <i>GABBR1</i>    | Body    |
| cg19451167 | 7  | 96,655,981  | 2.9E-15  | 0.273 | 0.259 |            |       |  |                  |         |
| cg11510586 | 9  | 72,027,409  | 0.04788  | 0.273 | 0.335 |            |       |  |                  |         |
| cg25681728 | 2  | 233,153,284 | 1.88E-21 | 0.273 | 0.263 |            |       |  | <i>DIS3L2</i>    | Body    |
| cg23681866 | 6  | 29,895,175  | 0.000001 | 0.273 | 0.244 |            |       |  |                  |         |
| cg17632299 | 13 | 53,312,966  | 0.028725 | 0.273 | 0.154 |            |       |  | <i>LECT1</i>     | Body    |
| cg26470101 | 2  | 173,099,597 | 0.006355 | 0.273 | 0.227 |            |       |  |                  |         |
| cg18141622 | 2  | 238,525,524 | 1.2E-07  | 0.273 | 0.277 |            |       |  |                  |         |
| cg04109923 | 13 | 28,495,600  | 0.00242  | 0.273 | 0.237 |            |       |  | <i>PDX1</i>      | Body    |
| cg09468836 | 19 | 55,889,611  | 1.61E-07 | 0.273 | 0.251 |            |       |  | <i>TMEM190</i>   | 3'UTR   |
| cg22617773 | 6  | 29,521,751  | 0.028351 | 0.273 | 0.216 |            |       |  |                  |         |
| cg06607764 | 17 | 76,719,635  | 0.000111 | 0.273 | 0.323 |            |       |  | <i>CYTH1</i>     | Body    |
| cg07842862 | 2  | 73,299,145  | 0.003954 | 0.273 | 0.210 |            |       |  | <i>SFXN5</i>     | TSS200  |
| cg24129589 | 5  | 1,008,558   | 2.78E-05 | 0.273 | 0.186 |            |       |  | <i>NKD2</i>      | TSS1500 |
| cg19815596 | 1  | 201,583,478 | 3.43E-07 | 0.273 | 0.230 |            |       |  |                  |         |
| cg01346501 | 17 | 38,254,714  | 3.21E-05 | 0.273 | 0.267 |            |       |  | <i>NR1D1</i>     | Body    |
| cg01965476 | 15 | 40,530,997  | 5.4E-09  | 0.273 | 0.225 |            |       |  | <i>PAK6</i>      | 5'UTR   |



|            |    |             |          |       |       |          |       |  |                 |         |
|------------|----|-------------|----------|-------|-------|----------|-------|--|-----------------|---------|
| cg00914726 | 1  | 60,539,400  | 1.55E-07 | 0.273 | 0.243 |          |       |  | <i>C1orf87</i>  | 1stExon |
| cg01876130 | 2  | 97,308,580  | 1.17E-13 | 0.273 | 0.255 |          |       |  | <i>FER1L5</i>   | 1stExon |
| cg11548446 | 2  | 28,867,073  | 1.07E-09 | 0.273 | 0.271 |          |       |  |                 |         |
| cg00947032 | 13 | 36,919,960  | 0.012955 | 0.273 | 0.286 |          |       |  | <i>SPG20</i>    | 5'UTR   |
| cg27424370 | X  | 23,350,651  | 0.014134 | 0.273 | 0.164 |          |       |  |                 |         |
| cg04075781 | 3  | 54,154,438  | 1.46E-10 | 0.273 | 0.224 |          |       |  |                 |         |
| cg01602621 | 19 | 11,689,813  | 8.79E-05 | 0.273 | 0.263 |          |       |  | <i>ACP5</i>     | TSS1500 |
| cg14375499 | 17 | 6,899,207   | 1.84E-08 | 0.273 | 0.212 |          |       |  | <i>ALOX12</i>   | TSS200  |
| cg15442678 | 3  | 79,065,762  | 3.34E-07 | 0.273 | 0.222 |          |       |  | <i>ROBO1</i>    | Body    |
| cg23397741 | 17 | 35,014,588  | 0.009014 | 0.273 | 0.200 |          |       |  |                 |         |
| cg01010211 | 22 | 17,956,453  | 1.21E-13 | 0.273 | 0.255 |          |       |  | <i>CECR2</i>    | TSS200  |
| cg19836199 | 21 | 36,421,941  | 0.021779 | 0.273 | 0.143 |          |       |  | <i>RUNX1</i>    | TSS1500 |
| cg18442286 | 11 | 59,333,608  | 0.001911 | 0.273 | 0.269 |          |       |  |                 |         |
| cg14805347 | 15 | 58,357,879  | 0.022145 | 0.273 | 0.293 |          |       |  | <i>ALDH1A2</i>  | 5'UTR   |
| cg11071682 | 1  | 210,411,064 | 0.00178  | 0.273 | 0.314 |          |       |  | <i>SERTAD4</i>  | 5'UTR   |
| cg27634344 | 4  | 188,917,251 | 1.86E-12 | 0.273 | 0.261 |          |       |  | <i>ZFP42</i>    | 5'UTR   |
| cg19411146 | 6  | 152,128,471 | 0.030037 | 0.273 | 0.143 |          |       |  | <i>ESR1</i>     | TSS1500 |
| cg23497436 | 19 | 55,767,121  | 9.25E-10 | 0.273 | 0.239 |          |       |  | <i>SAPS1</i>    | 5'UTR   |
| cg05253480 | 3  | 9,944,537   | 1.04E-05 | 0.273 | 0.286 |          |       |  | <i>IL17RE</i>   | 1stExon |
| cg26189983 | 1  | 12,227,700  | 2.59E-09 | 0.273 | 0.266 | 4.79E-16 | 0.164 |  | <i>TNFRSF1B</i> | Body    |
| cg23278196 | 12 | 54,071,111  | 0.014248 | 0.273 | 0.254 |          |       |  | <i>ATP5G2</i>   | TSS1500 |
| cg06687640 | 5  | 159,560,692 | 1.14E-05 | 0.273 | 0.260 |          |       |  |                 |         |
| cg13019143 | 7  | 96,633,060  | 1.35E-07 | 0.273 | 0.233 |          |       |  | <i>DLX6AS</i>   | Body    |
| cg01498231 | 10 | 73,847,259  | 0.002285 | 0.273 | 0.301 |          |       |  | <i>SPOCK2</i>   | Body    |
| cg03445151 | 2  | 23,516,881  | 0.045292 | 0.273 | 0.338 |          |       |  |                 |         |
| cg13588086 | 9  | 6,644,369   | 0.001637 | 0.273 | 0.307 |          |       |  | <i>GLDC</i>     | Body    |
| cg23309670 | 6  | 36,756,830  | 2.95E-05 | 0.273 | 0.299 |          |       |  | <i>CPNE5</i>    | Body    |
| cg12184886 | 17 | 73,584,029  | 3.58E-06 | 0.273 | 0.256 |          |       |  | <i>MYO15B</i>   | TSS200  |
| cg04295543 | 1  | 244,080,447 | 7.56E-11 | 0.273 | 0.234 |          |       |  |                 |         |
| cg06069187 | 17 | 26,698,283  | 0.000234 | 0.273 | 0.189 |          |       |  | <i>SARM1</i>    | TSS1500 |
| cg25077778 | 14 | 51,562,591  | 0.000264 | 0.273 | 0.178 |          |       |  | <i>TRIM9</i>    | TSS200  |
| cg14417784 | 2  | 131,009,681 | 8.92E-06 | 0.273 | 0.245 |          |       |  |                 |         |
| cg21848191 | 14 | 68,607,773  | 4.32E-12 | 0.273 | 0.257 |          |       |  | <i>RAD51L1</i>  | Body    |
| cg09626867 | 3  | 45,053,351  | 2.54E-06 | 0.273 | 0.299 |          |       |  | <i>EXOSC7</i>   | Body    |

|            |    |             |          |       |       |          |       |     |                |         |
|------------|----|-------------|----------|-------|-------|----------|-------|-----|----------------|---------|
| cg23363754 | 7  | 29,606,082  | 4.72E-11 | 0.273 | 0.262 |          |       |     | <i>PRR15</i>   | Body    |
| cg03760483 | 17 | 6,899,297   | 1.34E-06 | 0.273 | 0.194 | 1.65E-18 | 0.235 |     | <i>ALOX12</i>  | TSS200  |
| cg04875041 | 1  | 12,514,747  | 2.99E-11 | 0.273 | 0.260 |          |       |     | <i>VPS13D</i>  | Body    |
| cg21011616 | 2  | 177,015,992 | 1.53E-07 | 0.273 | 0.239 |          |       |     | <i>HOXD4</i>   | TSS200  |
| cg25951981 | 4  | 46,995,743  | 2.03E-07 | 0.273 | 0.313 |          |       |     | <i>GABRA4</i>  | TSS200  |
| cg18786873 | 1  | 110,610,899 | 2.36E-07 | 0.273 | 0.289 |          |       |     | <i>ALX3</i>    | Body    |
| cg13604445 | 9  | 116,342,046 | 6.51E-20 | 0.273 | 0.251 |          |       |     | <i>RGS3</i>    | Body    |
| cg16657152 | 8  | 125,784,769 | 0.014437 | 0.273 | 0.248 |          |       |     |                |         |
| cg08256939 | 1  | 112,058,236 | 5.3E-22  | 0.273 | 0.244 |          |       |     | <i>ADORA3</i>  | Body    |
| cg25436127 | X  | 36,976,108  | 5.25E-09 | 0.273 | 0.286 |          |       |     |                |         |
| cg02286091 | 5  | 78,407,678  | 7.71E-10 | 0.273 | 0.275 |          |       |     | <i>BHMT</i>    | 5'UTR   |
| cg09262171 | 16 | 4,140,361   | 0.000447 | 0.273 | 0.201 |          |       |     | <i>ADCY9</i>   | Body    |
| cg17580045 | 12 | 4,384,890   | 0.01391  | 0.273 | 0.349 | 7.87E-27 | 0.202 |     | <i>CCND2</i>   | Body    |
| cg03594515 | 3  | 129,346,178 | 0.003643 | 0.273 | 0.287 |          |       |     |                |         |
| cg10821050 | 7  | 155,603,913 | 0.014283 | 0.273 | 0.170 |          |       |     | <i>SHH</i>     | Body    |
| cg25611756 | 2  | 65,086,991  | 3.72E-06 | 0.273 | 0.213 |          |       |     |                |         |
| cg02619661 | 12 | 116,036,878 | 2.18E-05 | 0.273 | 0.213 |          |       |     |                |         |
| cg12257156 | 7  | 158,823,799 | 2.24E-06 | 0.273 | 0.236 |          |       |     | <i>VIPR2</i>   | Body    |
| cg07419680 | X  | 134,429,972 | 1.95E-06 | 0.273 | 0.266 |          |       |     | <i>ZNF75D</i>  | 5'UTR   |
| cg13964726 | 9  | 71,062,328  | 5.69E-11 | 0.273 | 0.238 |          |       |     | <i>PGM5</i>    | Body    |
| cg02825977 | 10 | 94,825,848  | 1.86E-05 | 0.273 | 0.164 |          |       |     | <i>CYP26C1</i> | Body    |
| cg20741105 | 7  | 43,686,889  | 3.19E-07 | 0.273 | 0.275 |          |       |     | <i>C7orf44</i> | Body    |
| cg11923296 | 3  | 149,374,285 | 2.37E-21 | 0.273 | 0.262 |          |       | Yes | <i>WWTR1</i>   | Body    |
| cg00760729 | 2  | 161,236,088 | 2.93E-08 | 0.273 | 0.260 |          |       |     | <i>RBMS1</i>   | Body    |
| cg01581084 | 8  | 99,961,874  | 4.1E-08  | 0.273 | 0.277 |          |       |     | <i>OSR2</i>    | Body    |
| cg20165694 | 13 | 30,077,315  | 7.55E-06 | 0.272 | 0.195 |          |       |     | <i>MTUS2</i>   | Body    |
| cg11505661 | 12 | 57,618,965  | 1.84E-08 | 0.272 | 0.293 |          |       |     | <i>NXPH4</i>   | Body    |
| cg13781744 | 1  | 43,250,691  | 1.25E-10 | 0.272 | 0.259 |          |       |     |                |         |
| cg00067414 | 6  | 151,188,081 | 0.000835 | 0.272 | 0.204 |          |       |     | <i>MTHFD1L</i> | Body    |
| cg11312495 | 5  | 115,697,370 | 3.91E-11 | 0.272 | 0.279 |          |       |     |                |         |
| cg12147622 | 10 | 74,021,432  | 7.05E-16 | 0.272 | 0.260 |          |       |     |                |         |
| cg16745616 | 19 | 8,428,856   | 0.002453 | 0.272 | 0.168 | 1.27E-14 | 0.104 |     | <i>ANGPTL4</i> | TSS200  |
| cg02228185 | 17 | 3,379,567   | 2.47E-05 | 0.272 | 0.294 | 6.45E-10 | 0.087 |     | <i>ASPA</i>    | 1stExon |
| cg11377730 | 8  | 17,270,604  | 0.001178 | 0.272 | 0.268 |          |       |     | <i>MTMR7</i>   | Body    |

|            |    |             |          |       |       |          |       |  |                     |         |
|------------|----|-------------|----------|-------|-------|----------|-------|--|---------------------|---------|
| cg09530163 | 16 | 55,512,822  | 3.63E-13 | 0.272 | 0.236 |          |       |  | <i>MMP2</i>         | TSS1500 |
| cg09316122 | 1  | 228,195,522 | 0.007666 | 0.272 | 0.344 |          |       |  | <i>WNT3A</i>        | Body    |
| cg23807890 | 2  | 228,736,357 | 0.010026 | 0.272 | 0.302 |          |       |  | <i>WDR69</i>        | 1stExon |
| cg02824888 | 12 | 115,129,011 | 0.032664 | 0.272 | 0.391 |          |       |  |                     |         |
| cg20549620 | 2  | 220,970,010 | 6.74E-07 | 0.272 | 0.217 |          |       |  |                     |         |
| cg24257776 | 3  | 47,051,546  | 1.6E-17  | 0.272 | 0.264 |          |       |  | <i>LOC100129354</i> | TSS1500 |
| cg03231163 | 19 | 39,360,465  | 0.018371 | 0.272 | 0.269 |          |       |  | <i>RINL</i>         | Body    |
| cg13769548 | 19 | 54,984,708  | 0.000218 | 0.272 | 0.278 |          |       |  | <i>CDC42EP5</i>     | TSS1500 |
| cg20799268 | 8  | 142,275,649 | 0.007588 | 0.272 | 0.259 |          |       |  |                     |         |
| cg23286646 | 21 | 38,120,350  | 0.000371 | 0.272 | 0.217 |          |       |  | <i>SIM2</i>         | Body    |
| cg00397986 | 8  | 11,561,593  | 3.4E-06  | 0.272 | 0.238 |          |       |  | <i>GATA4</i>        | TSS200  |
| cg22233974 | 1  | 39,546,511  | 1.52E-14 | 0.272 | 0.266 | 2.26E-23 | 0.174 |  | <i>MACF1</i>        | TSS1500 |
| cg26905768 | 7  | 34,098,803  | 1.74E-06 | 0.272 | 0.214 |          |       |  | <i>BMPER</i>        | Body    |
| cg07204280 | 18 | 12,254,551  | 0.034608 | 0.272 | 0.294 |          |       |  | <i>CIDEA</i>        | Body    |
| cg01975591 | X  | 9,432,530   | 3.94E-06 | 0.272 | 0.266 |          |       |  | <i>TBL1X</i>        | 5'UTR   |
| cg24322131 | 21 | 45,971,503  | 0.005129 | 0.272 | 0.247 |          |       |  | <i>KRTAP10-2</i>    | TSS200  |
| cg10988628 | 10 | 135,160,697 | 3.33E-08 | 0.272 | 0.231 |          |       |  | <i>PRAP1</i>        | TSS200  |
| cg14624546 | 11 | 8,800,270   | 2.95E-21 | 0.272 | 0.255 |          |       |  | <i>ST5</i>          | 5'UTR   |
| cg00035316 | 2  | 176,993,017 | 3.36E-05 | 0.272 | 0.242 |          |       |  | <i>HOXD8</i>        | TSS1500 |
| cg00901982 | 2  | 70,257,298  | 1.73E-05 | 0.272 | 0.267 |          |       |  |                     |         |
| cg02282774 | 5  | 50,264,516  | 0.006778 | 0.272 | 0.298 |          |       |  |                     |         |
| cg21325485 | 7  | 158,364,932 | 1.51E-19 | 0.272 | 0.269 |          |       |  | <i>PTPRN2</i>       | Body    |
| cg16801374 | 12 | 102,872,708 | 0.00014  | 0.272 | 0.236 |          |       |  | <i>IGF1</i>         | Body    |
| cg17479501 | 17 | 80,806,191  | 0.000142 | 0.272 | 0.304 |          |       |  | <i>TBCD</i>         | Body    |
| cg02583633 | 2  | 175,192,013 | 1.07E-09 | 0.272 | 0.253 |          |       |  |                     |         |
| cg24345062 | 2  | 200,334,439 | 0.000367 | 0.272 | 0.286 |          |       |  | <i>FLJ32063</i>     | Body    |
| cg18827954 | 4  | 5,053,585   | 0.001058 | 0.272 | 0.252 |          |       |  | <i>STK32B</i>       | 1stExon |
| cg25740565 | 2  | 200,335,101 | 5.56E-06 | 0.272 | 0.277 |          |       |  | <i>FLJ32063</i>     | Body    |
| cg10192893 | 4  | 41,747,895  | 0.02918  | 0.272 | 0.297 |          |       |  | <i>PHOX2B</i>       | Body    |
| cg20034792 | 6  | 29,521,781  | 0.000219 | 0.272 | 0.259 |          |       |  |                     |         |
| cg05097306 | 10 | 45,374,683  | 8.75E-13 | 0.272 | 0.237 |          |       |  |                     |         |
| cg13652008 | 2  | 33,359,356  | 0.000197 | 0.272 | 0.190 |          |       |  | <i>LTBP1</i>        | Body    |
| cg18096987 | 3  | 11,623,873  | 0.002763 | 0.272 | 0.216 |          |       |  | <i>VGLL4</i>        | Body    |
| cg00028211 | 2  | 45,028,802  | 1.5E-07  | 0.272 | 0.275 |          |       |  |                     |         |

|            |    |             |          |       |       |          |       |  |                  |         |
|------------|----|-------------|----------|-------|-------|----------|-------|--|------------------|---------|
| cg10416963 | 4  | 121,844,401 | 0.000916 | 0.272 | 0.145 |          |       |  | <i>PRDM5</i>     | TSS1500 |
| cg11179081 | 6  | 27,107,756  | 8.3E-08  | 0.272 | 0.262 |          |       |  | <i>HIST1H2BK</i> | 3'UTR   |
| cg20377305 | 7  | 96,650,668  | 3.47E-10 | 0.272 | 0.272 |          |       |  | <i>DLX5</i>      | Body    |
| cg01296889 | 3  | 54,122,032  | 1.93E-08 | 0.272 | 0.277 |          |       |  |                  |         |
| cg25349034 | 3  | 149,265,300 | 3.67E-08 | 0.272 | 0.261 |          |       |  | <i>WWTR1</i>     | Body    |
| cg01551350 | 1  | 160,951,675 | 0.000207 | 0.272 | 0.289 |          |       |  |                  |         |
| cg20653955 | 7  | 6,566,649   | 3.62E-09 | 0.272 | 0.227 |          |       |  | <i>GRID2IP</i>   | Body    |
| cg10966582 | 1  | 17,085,860  | 1.03E-08 | 0.272 | 0.263 |          |       |  | <i>MST1P9</i>    | Body    |
| cg03464514 | 7  | 137,028,442 | 0.0034   | 0.272 | 0.191 |          |       |  | <i>PTN</i>       | 5'UTR   |
| cg01481159 | 20 | 21,489,196  | 0.003721 | 0.272 | 0.390 |          |       |  |                  |         |
| cg04886703 | 1  | 45,250,266  | 9.38E-05 | 0.272 | 0.310 |          |       |  | <i>BEST4</i>     | Body    |
| cg23715700 | 19 | 16,188,274  | 0.002466 | 0.272 | 0.285 |          |       |  | <i>TPM4</i>      | Body    |
| cg05942508 | 11 | 113,846,922 | 9.72E-06 | 0.272 | 0.208 |          |       |  | <i>HTR3A</i>     | Body    |
| cg20000562 | 14 | 36,978,633  | 0.004953 | 0.272 | 0.390 |          |       |  | <i>SFTA3</i>     | Body    |
| cg26784201 | 5  | 150,050,950 | 5.44E-08 | 0.272 | 0.258 |          |       |  | <i>MYOZ3</i>     | Body    |
| cg02081701 | 2  | 139,537,197 | 0.045428 | 0.272 | 0.327 |          |       |  | <i>NXPH2</i>     | Body    |
| cg23175074 | 10 | 105,212,490 | 9.23E-07 | 0.272 | 0.255 |          |       |  | <i>CALHM2</i>    | TSS1500 |
| cg04770088 | 17 | 63,225,020  | 0.016222 | 0.272 | 0.330 |          |       |  |                  |         |
| cg16389399 | 11 | 43,603,991  | 8.35E-05 | 0.272 | 0.265 |          |       |  |                  |         |
| cg19917412 | 11 | 64,815,189  | 1.06E-06 | 0.272 | 0.249 |          |       |  | <i>NAALADL1</i>  | Body    |
| cg24572745 | 3  | 112,932,345 | 6.56E-05 | 0.272 | 0.294 |          |       |  | <i>BOC</i>       | 5'UTR   |
| cg27099262 | 12 | 20,263,199  | 3.47E-13 | 0.272 | 0.275 |          |       |  |                  |         |
| cg00876332 | Y  | 21,664,717  | 0.001694 | 0.272 | 0.251 |          |       |  | <i>BCORL2</i>    | Body    |
| cg02951552 | 1  | 156,051,441 | 0.039719 | 0.272 | 0.105 |          |       |  | <i>MEX3A</i>     | 1stExon |
| cg05436658 | 16 | 23,847,568  | 0.000289 | 0.272 | 0.191 | 5.88E-15 | 0.219 |  | <i>PRKCB</i>     | 1stExon |
| cg15978561 | 2  | 240,196,996 | 1.87E-07 | 0.272 | 0.241 |          |       |  | <i>HDAC4</i>     | Body    |
| cg06907680 | 14 | 91,580,129  | 0.002825 | 0.272 | 0.158 |          |       |  | <i>C14orf159</i> | TSS1500 |
| cg24654177 | 15 | 58,791,257  | 3.53E-29 | 0.272 | 0.263 |          |       |  | <i>LIPC</i>      | Body    |
| cg06012347 | 11 | 65,066,368  | 6.44E-12 | 0.272 | 0.273 |          |       |  |                  |         |
| cg25622366 | 2  | 63,281,139  | 2.4E-05  | 0.272 | 0.266 |          |       |  | <i>OTX1</i>      | Body    |
| cg25881804 | 20 | 21,081,901  | 0.0118   | 0.272 | 0.251 |          |       |  |                  |         |
| cg12462816 | 6  | 127,836,107 | 6.82E-05 | 0.272 | 0.244 |          |       |  | <i>C6orf174</i>  | Body    |
| cg15028458 | 3  | 58,860,290  | 4.77E-09 | 0.272 | 0.281 |          |       |  | <i>C3orf67</i>   | Body    |
| cg18526008 | 3  | 177,076,224 | 0.007214 | 0.272 | 0.364 |          |       |  |                  |         |

|            |    |             |          |       |       |          |       |  |                 |         |
|------------|----|-------------|----------|-------|-------|----------|-------|--|-----------------|---------|
| cg08547691 | 17 | 9,143,754   | 7.34E-05 | 0.272 | 0.235 |          |       |  | <i>NTN1</i>     | 3'UTR   |
| cg20973210 | 19 | 2,282,729   | 1.76E-07 | 0.272 | 0.258 |          |       |  | <i>C19orf35</i> | TSS1500 |
| cg00668426 | X  | 102,319,340 | 0.004854 | 0.272 | 0.256 |          |       |  | <i>BEX1</i>     | TSS200  |
| cg05385377 | 1  | 15,480,844  | 5.16E-08 | 0.272 | 0.255 | 8.42E-27 | 0.182 |  | <i>TMEM51</i>   | 5'UTR   |
| cg12284802 | 15 | 79,723,655  | 7.15E-05 | 0.272 | 0.183 |          |       |  | <i>KIAA1024</i> | TSS1500 |
| cg07813142 | 2  | 171,573,223 | 0.000472 | 0.272 | 0.230 |          |       |  | <i>SP5</i>      | Body    |
| cg07042104 | 20 | 34,206,951  | 0.000155 | 0.272 | 0.206 |          |       |  | <i>SPAG4</i>    | Body    |
| cg04231042 | 4  | 54,729,555  | 1.46E-17 | 0.272 | 0.256 |          |       |  |                 |         |
| cg00627029 | 17 | 72,322,791  | 0.00021  | 0.272 | 0.295 |          |       |  | <i>KIF19</i>    | Body    |
| cg12014547 | 11 | 20,692,092  | 0.018282 | 0.272 | 0.260 |          |       |  | <i>NELL1</i>    | Body    |
| cg10372188 | 11 | 117,748,169 | 2.91E-06 | 0.272 | 0.211 |          |       |  | <i>FXYD6</i>    | TSS1500 |
| cg00587922 | 6  | 30,651,601  | 1.82E-09 | 0.272 | 0.262 |          |       |  | <i>KIAA1949</i> | Body    |
| cg14469436 | 3  | 127,441,359 | 4.72E-19 | 0.272 | 0.260 |          |       |  | <i>MGLL</i>     | Body    |
| cg24079361 | 13 | 44,948,039  | 0.019047 | 0.272 | 0.310 |          |       |  | <i>SERP2</i>    | 1stExon |
| cg21504815 | 6  | 27,791,876  | 0.003761 | 0.272 | 0.219 |          |       |  | <i>HIST1H4J</i> | TSS200  |
| cg16814483 | 1  | 146,550,074 | 8.49E-05 | 0.272 | 0.307 |          |       |  |                 |         |
| cg01942863 | 7  | 99,769,432  | 0.021957 | 0.272 | 0.221 |          |       |  | <i>GPC2</i>     | Body    |
| cg22559034 | 5  | 92,910,534  | 1.79E-06 | 0.272 | 0.236 |          |       |  | <i>FLJ42709</i> | Body    |
| cg15986276 | 14 | 101,176,310 | 0.023891 | 0.272 | 0.207 |          |       |  |                 |         |
| cg17880014 | 2  | 71,693,165  | 0.002205 | 0.272 | 0.335 |          |       |  | <i>DYSF</i>     | TSS1500 |
| cg23217622 | 1  | 156,405,438 | 6.49E-05 | 0.272 | 0.268 |          |       |  |                 |         |
| cg00495860 | 21 | 38,065,524  | 0.029122 | 0.272 | 0.323 |          |       |  |                 |         |
| cg09989996 | 1  | 753,376     | 6.74E-05 | 0.272 | 0.200 |          |       |  |                 |         |
| cg05804047 | 4  | 77,752,568  | 1.46E-10 | 0.271 | 0.279 |          |       |  |                 |         |
| cg03474202 | 17 | 45,855,739  | 1.23E-06 | 0.271 | 0.250 |          |       |  |                 |         |
| cg03535793 | 12 | 3,862,594   | 0.000135 | 0.271 | 0.236 |          |       |  | <i>EFCAB4B</i>  | TSS1500 |
| cg06352750 | 2  | 192,711,926 | 0.000459 | 0.271 | 0.300 | 2.77E-21 | 0.185 |  | <i>SDPR</i>     | 5'UTR   |
| cg22904048 | 4  | 6,665,672   | 4.04E-18 | 0.271 | 0.279 |          |       |  |                 |         |
| cg23732608 | 20 | 20,180,469  | 1.33E-06 | 0.271 | 0.211 |          |       |  | <i>C20orf26</i> | Body    |
| cg03113038 | 16 | 85,181,211  | 2.37E-09 | 0.271 | 0.222 |          |       |  |                 |         |
| cg23537887 | 3  | 54,157,647  | 0.000415 | 0.271 | 0.211 |          |       |  | <i>CACNA2D3</i> | Body    |
| cg01679516 | 18 | 30,352,505  | 2.73E-05 | 0.271 | 0.275 |          |       |  | <i>KLHL14</i>   | 5'UTR   |
| cg06459000 | 11 | 111,411,199 | 0.000247 | 0.271 | 0.247 |          |       |  | <i>LAYN</i>     | TSS200  |
| cg01400468 | 2  | 54,087,469  | 7.47E-07 | 0.271 | 0.241 |          |       |  | <i>GPR75</i>    | TSS1500 |

|            |    |             |          |       |       |            |       |  |                 |         |
|------------|----|-------------|----------|-------|-------|------------|-------|--|-----------------|---------|
| cg19718309 | 14 | 100,632,904 | 0.013777 | 0.271 | 0.355 |            |       |  |                 |         |
| cg01559726 | 3  | 54,157,894  | 0.005994 | 0.271 | 0.252 |            |       |  | <i>CACNA2D3</i> | Body    |
| cg00503866 | 1  | 39,546,656  | 9.82E-13 | 0.271 | 0.264 |            |       |  | <i>MACF1</i>    | TSS1500 |
| cg07553115 | X  | 107,976,167 | 0.013471 | 0.271 | 0.350 |            |       |  | <i>IRS4</i>     | 1stExon |
| cg19499884 | 10 | 102,760,724 | 1.53E-05 | 0.271 | 0.285 |            |       |  | <i>LZTS2</i>    | 5'UTR   |
| cg17291251 | 10 | 49,678,358  | 2.31E-09 | 0.271 | 0.265 |            |       |  | <i>ARHGAP22</i> | Body    |
| cg23010048 | 19 | 52,391,257  | 0.00515  | 0.271 | 0.232 |            |       |  | <i>ZNF577</i>   | TSS200  |
| cg25499067 | 8  | 23,559,988  | 6.76E-09 | 0.271 | 0.266 |            |       |  | <i>NKX2-6</i>   | Body    |
| cg05904716 | 5  | 179,779,205 | 4.86E-06 | 0.271 | 0.261 |            |       |  | <i>GFPT2</i>    | Body    |
| cg01824919 | 1  | 116,711,339 | 4.74E-06 | 0.271 | 0.225 |            |       |  |                 |         |
| cg09844474 | 6  | 33,161,276  | 0.000631 | 0.271 | 0.229 |            |       |  | <i>COL11A2</i>  | TSS1500 |
| cg15384383 | 10 | 99,798,415  | 2.3E-06  | 0.271 | 0.265 |            |       |  |                 |         |
| cg15661311 | 11 | 504,551     | 9.46E-05 | 0.271 | 0.218 |            |       |  | <i>RNH1</i>     | 5'UTR   |
| cg12737152 | 11 | 129,565,909 | 3.66E-05 | 0.271 | 0.269 |            |       |  |                 |         |
| cg15545035 | 12 | 28,128,288  | 0.001358 | 0.271 | 0.208 |            |       |  |                 |         |
| cg00249032 | 20 | 43,975,752  | 0.029576 | 0.271 | 0.137 |            |       |  | <i>SDC4</i>     | Body    |
| cg01637175 | 17 | 21,281,507  | 1.77E-29 | 0.271 | 0.279 |            |       |  | <i>KCNJ12</i>   | 5'UTR   |
| cg21824733 | 15 | 42,197,055  | 6.08E-13 | 0.271 | 0.257 |            |       |  | <i>EHD4</i>     | Body    |
| cg23245007 | 3  | 195,682,326 | 8.19E-09 | 0.271 | 0.238 |            |       |  |                 |         |
| cg02303016 | 7  | 130,020,130 | 7.12E-07 | 0.271 | 0.323 |            |       |  | <i>CPA1</i>     | TSS200  |
| cg11594833 | 12 | 54,444,985  | 2.01E-06 | 0.271 | 0.205 |            |       |  | <i>HOXC4</i>    | 5'UTR   |
| cg16661209 | 13 | 29,107,069  | 0.001219 | 0.271 | 0.312 |            |       |  |                 |         |
| cg05368966 | 12 | 14,392,531  | 4.22E-09 | 0.271 | 0.246 |            |       |  |                 |         |
| cg17131553 | 8  | 116,676,938 | 5.36E-07 | 0.271 | 0.259 |            |       |  | <i>TRPS1</i>    | 5'UTR   |
| cg23697202 | 6  | 91,320,190  | 0.00048  | 0.271 | 0.194 |            |       |  |                 |         |
| cg05485241 | 6  | 137,311,162 | 0.003735 | 0.271 | 0.179 |            |       |  | <i>NHEG1</i>    | Body    |
| cg01646109 | 4  | 183,064,633 | 0.014993 | 0.271 | 0.339 |            |       |  | <i>MGC45800</i> | Body    |
| cg26239725 | 21 | 46,824,732  | 0.001146 | 0.271 | 0.181 |            |       |  | <i>COL18A1</i>  | TSS1500 |
| cg02115117 | 2  | 24,398,668  | 2.47E-08 | 0.271 | 0.244 |            |       |  | <i>C2orf84</i>  | Body    |
| cg20628994 | 10 | 118,429,852 | 0.011675 | 0.271 | 0.271 |            |       |  | <i>C10orf82</i> | TSS1500 |
| cg06819935 | 16 | 50,003,431  | 7.74E-09 | 0.271 | 0.222 |            |       |  |                 |         |
| cg03536474 | 12 | 54,367,460  | 0.010402 | 0.271 | 0.276 |            |       |  | <i>HOXC11</i>   | 1stExon |
| cg17807663 | 17 | 46,622,012  | 0.001444 | 0.271 | 0.256 |            |       |  | <i>HOXB2</i>    | 1stExon |
| cg23776012 | 17 | 38,821,403  | 0.008901 | 0.271 | 0.260 | 0.00000535 | 0.112 |  | <i>KRT222</i>   | 5'UTR   |

|            |    |             |          |       |       |          |       |  |                 |         |
|------------|----|-------------|----------|-------|-------|----------|-------|--|-----------------|---------|
| cg01205087 | 2  | 47,008,202  | 8.09E-21 | 0.271 | 0.240 |          |       |  |                 |         |
| cg25895948 | 15 | 85,360,655  | 7.5E-09  | 0.271 | 0.254 |          |       |  | <i>ALPK3</i>    | 1stExon |
| cg01508380 | 14 | 23,305,585  | 0.001104 | 0.271 | 0.300 |          |       |  | <i>MMP14</i>    | TSS1500 |
| cg12014818 | 2  | 219,744,634 | 1.34E-11 | 0.271 | 0.269 |          |       |  | <i>WNT10A</i>   | TSS1500 |
| cg02337873 | 11 | 65,659,393  | 1.01E-12 | 0.271 | 0.272 |          |       |  |                 |         |
| cg17261120 | 11 | 12,578,707  | 2.15E-12 | 0.271 | 0.267 |          |       |  |                 |         |
| cg09082287 | 1  | 65,730,494  | 0.000007 | 0.271 | 0.238 | 2.92E-30 | 0.255 |  | <i>DNAJC6</i>   | 5'UTR   |
| cg26671281 | 11 | 2,828,214   | 1.34E-23 | 0.271 | 0.268 |          |       |  | <i>KCNQ1</i>    | Body    |
| cg27100022 | 11 | 107,800,031 | 0.000292 | 0.271 | 0.181 |          |       |  | <i>RAB39</i>    | Body    |
| cg00422474 | 8  | 67,261,068  | 0.001989 | 0.271 | 0.235 |          |       |  |                 |         |
| cg15105703 | 15 | 45,421,860  | 0.000474 | 0.271 | 0.252 | 4.12E-14 | 0.171 |  | <i>DUOX1</i>    | TSS1500 |
| cg06941230 | 16 | 11,484,506  | 7.08E-17 | 0.271 | 0.269 |          |       |  |                 |         |
| cg06255004 | 9  | 139,580,799 | 1.32E-08 | 0.271 | 0.239 |          |       |  | <i>AGPAT2</i>   | Body    |
| cg11174855 | 10 | 134,598,352 | 9.44E-06 | 0.271 | 0.245 |          |       |  | <i>NKX6-2</i>   | 3'UTR   |
| cg14669514 | 13 | 22,243,722  | 0.000448 | 0.271 | 0.113 |          |       |  | <i>FGF9</i>     | TSS1500 |
| cg08684879 | 12 | 5,369,360   | 4.19E-07 | 0.271 | 0.244 |          |       |  |                 |         |
| cg10164640 | 1  | 45,792,557  | 0.001126 | 0.271 | 0.254 | 2.81E-24 | 0.192 |  | <i>HPDL</i>     | 1stExon |
| cg04557883 | 6  | 3,753,083   | 1.6E-05  | 0.271 | 0.253 |          |       |  | <i>C6orf145</i> | TSS1500 |
| cg23896816 | 22 | 39,473,253  | 2.18E-08 | 0.271 | 0.257 |          |       |  | <i>APOBEC3G</i> | 5'UTR   |
| cg13917273 | 9  | 132,099,943 | 7.7E-19  | 0.271 | 0.247 |          |       |  |                 |         |
| cg03224572 | 8  | 97,172,012  | 0.012835 | 0.271 | 0.326 |          |       |  | <i>GDF6</i>     | Body    |
| cg05157171 | 6  | 29,910,411  | 1.37E-07 | 0.271 | 0.268 |          |       |  | <i>HLA-A</i>    | Body    |
| cg22821981 | 3  | 122,296,435 | 3.26E-11 | 0.271 | 0.263 |          |       |  | <i>PARP15</i>   | TSS200  |
| cg00334177 | 6  | 28,511,757  | 5.58E-06 | 0.271 | 0.277 |          |       |  |                 |         |
| cg01799671 | 16 | 81,560,752  | 7.36E-14 | 0.271 | 0.263 |          |       |  | <i>CMIP</i>     | Body    |
| cg13033898 | 6  | 151,561,055 | 2.7E-07  | 0.271 | 0.246 |          |       |  | <i>AKAP12</i>   | TSS200  |
| cg23688719 | 1  | 65,935,654  | 1.24E-16 | 0.271 | 0.259 |          |       |  | <i>LEPR</i>     | 5'UTR   |
| cg01229787 | 15 | 100,048,371 | 7.05E-08 | 0.271 | 0.260 |          |       |  |                 |         |
| cg00374672 | 7  | 100,463,416 | 1.1E-08  | 0.271 | 0.233 |          |       |  | <i>SLC12A9</i>  | Body    |
| cg10611580 | 17 | 75,319,942  | 4.36E-11 | 0.271 | 0.215 |          |       |  | <i>SEPT9</i>    | 5'UTR   |
| cg24474193 | 4  | 108,662,252 | 1.37E-14 | 0.271 | 0.242 |          |       |  |                 |         |
| cg10333808 | 12 | 22,487,459  | 0.008052 | 0.271 | 0.280 |          |       |  | <i>ST8SIA1</i>  | 5'UTR   |
| cg02648057 | 2  | 102,867,466 | 0.001502 | 0.271 | 0.248 |          |       |  |                 |         |
| cg22473333 | 5  | 54,287,462  | 9.5E-06  | 0.271 | 0.290 |          |       |  |                 |         |

|            |    |             |          |       |       |          |       |  |                 |         |
|------------|----|-------------|----------|-------|-------|----------|-------|--|-----------------|---------|
| cg19629053 | 3  | 44,626,193  | 6.19E-05 | 0.271 | 0.162 |          |       |  | <i>ZNF660</i>   | TSS1500 |
| cg10461547 | 3  | 13,323,567  | 8.88E-06 | 0.271 | 0.309 |          |       |  |                 |         |
| cg18272889 | 17 | 66,197,318  | 1.27E-07 | 0.271 | 0.198 |          |       |  |                 |         |
| cg24756378 | 14 | 33,401,638  | 2.21E-20 | 0.271 | 0.245 |          |       |  |                 |         |
| cg19210770 | 2  | 220,379,091 | 0.028339 | 0.271 | 0.276 | 4.92E-09 | 0.141 |  | <i>ACCN4</i>    | 1stExon |
| cg00345443 | 3  | 54,121,778  | 8.75E-10 | 0.271 | 0.281 |          |       |  |                 |         |
| cg10806711 | 1  | 113,265,679 | 1.65E-19 | 0.271 | 0.263 |          |       |  | <i>FAM19A3</i>  | Body    |
| cg18349911 | 5  | 1,877,135   | 2.22E-07 | 0.271 | 0.267 |          |       |  |                 |         |
| cg24427724 | 12 | 6,234,257   | 3.22E-12 | 0.271 | 0.277 |          |       |  | <i>VWF</i>      | TSS1500 |
| cg07605620 | 19 | 21,512,141  | 0.001411 | 0.271 | 0.172 |          |       |  | <i>ZNF708</i>   | 1stExon |
| cg10512292 | 12 | 4,378,267   | 9.73E-05 | 0.271 | 0.264 |          |       |  |                 |         |
| cg01681847 | 11 | 43,605,269  | 0.00018  | 0.271 | 0.261 |          |       |  |                 |         |
| cg04637478 | 5  | 140,753,655 | 0.003567 | 0.271 | 0.352 |          |       |  | <i>PCDHGA4</i>  | Body    |
| cg05242371 | 19 | 46,286,475  | 1.87E-23 | 0.271 | 0.272 |          |       |  | <i>DMPK</i>     | TSS1500 |
| cg11970252 | 13 | 42,188,629  | 6.81E-08 | 0.271 | 0.276 |          |       |  | <i>KIAA0564</i> | Body    |
| cg17701073 | 3  | 55,523,895  | 0.001171 | 0.271 | 0.173 |          |       |  |                 |         |
| cg22756866 | 7  | 1,279,131   | 0.00252  | 0.271 | 0.287 |          |       |  |                 |         |
| cg15146834 | 6  | 150,463,775 | 0.00182  | 0.271 | 0.241 |          |       |  | <i>PPP1R14C</i> | TSS1500 |
| cg19317600 | 4  | 8,395,941   | 0.001433 | 0.271 | 0.325 |          |       |  | <i>ACOX3</i>    | Body    |
| cg24374636 | 15 | 41,852,586  | 6.28E-08 | 0.271 | 0.254 |          |       |  | <i>TYRO3</i>    | Body    |
| cg00764307 | 14 | 94,408,121  | 3.22E-10 | 0.271 | 0.246 |          |       |  | <i>ASB2</i>     | Body    |
| cg18282455 | 13 | 36,729,109  | 0.00101  | 0.270 | 0.231 |          |       |  |                 |         |
| cg08856601 | 1  | 65,730,351  | 0.000461 | 0.270 | 0.234 |          |       |  | <i>DNAJC6</i>   | TSS200  |
| cg09295252 | 6  | 5,026,552   | 0.035166 | 0.270 | 0.308 |          |       |  |                 |         |
| cg12938068 | 13 | 28,549,698  | 0.01731  | 0.270 | 0.169 |          |       |  |                 |         |
| cg24884142 | 1  | 119,532,056 | 1.61E-09 | 0.270 | 0.247 |          |       |  | <i>TBX15</i>    | 1stExon |
| cg21266975 | 18 | 2,846,181   | 5.24E-12 | 0.270 | 0.256 |          |       |  | <i>EMILIN2</i>  | TSS1500 |
| cg23792314 | 12 | 25,056,243  | 0.000645 | 0.270 | 0.260 |          |       |  | <i>BCAT1</i>    | Body    |
| cg04191427 | 17 | 78,833,259  | 0.000781 | 0.270 | 0.177 |          |       |  | <i>RPTOR</i>    | Body    |
| cg05768427 | 3  | 127,634,188 | 0.021187 | 0.270 | 0.140 |          |       |  |                 |         |
| cg07034329 | 5  | 66,124,395  | 0.004614 | 0.270 | 0.109 |          |       |  | <i>MAST4</i>    | TSS1500 |
| cg05997941 | 2  | 219,845,912 | 2.86E-25 | 0.270 | 0.272 |          |       |  | <i>FEV</i>      | 3'UTR   |
| cg21839984 | 17 | 30,846,986  | 1.21E-11 | 0.270 | 0.261 |          |       |  | <i>MYO1D</i>    | Body    |
| cg25652029 | 2  | 182,321,786 | 0.013258 | 0.270 | 0.266 |          |       |  | <i>ITGA4</i>    | 5'UTR   |



|            |    |             |          |       |       |          |       |  |                  |         |
|------------|----|-------------|----------|-------|-------|----------|-------|--|------------------|---------|
| cg23359665 | 6  | 32,120,907  | 4.71E-09 | 0.270 | 0.284 |          |       |  | <i>PPT2</i>      | TSS1500 |
| cg01884057 | 2  | 25,150,051  | 1.63E-13 | 0.270 | 0.250 |          |       |  |                  |         |
| cg09696044 | 20 | 55,968,294  | 1.35E-14 | 0.270 | 0.247 |          |       |  | <i>RBM38</i>     | Body    |
| cg08276171 | 14 | 104,850,405 | 4.03E-05 | 0.270 | 0.241 |          |       |  |                  |         |
| cg18091046 | 13 | 30,077,344  | 0.000225 | 0.270 | 0.221 |          |       |  | <i>MTUS2</i>     | 3'UTR   |
| cg15424989 | 18 | 19,757,468  | 4.26E-23 | 0.270 | 0.238 |          |       |  | <i>GATA6</i>     | Body    |
| cg13870539 | 10 | 95,848,649  | 2.43E-09 | 0.270 | 0.237 |          |       |  | <i>PLCE1</i>     | TSS200  |
| cg09272217 | 11 | 45,179,364  | 3.2E-22  | 0.270 | 0.270 |          |       |  | <i>PRDM11</i>    | Body    |
| cg25650964 | 13 | 33,544,014  | 1.51E-05 | 0.270 | 0.283 |          |       |  |                  |         |
| cg25924694 | 12 | 102,872,603 | 7.61E-05 | 0.270 | 0.251 |          |       |  | <i>IGF1</i>      | Body    |
| cg02685896 | 17 | 27,038,861  | 2.33E-05 | 0.270 | 0.270 |          |       |  | <i>PROCA1</i>    | 5'UTR   |
| cg11109845 | 7  | 148,394,888 | 9.08E-09 | 0.270 | 0.250 |          |       |  | <i>CUL1</i>      | TSS1500 |
| cg20935741 | 2  | 176,968,584 | 0.001688 | 0.270 | 0.267 |          |       |  |                  |         |
| cg18092474 | 15 | 75,019,302  | 2.37E-11 | 0.270 | 0.273 |          |       |  | <i>CYP1A1</i>    | TSS1500 |
| cg04926361 | 14 | 36,982,447  | 1.91E-09 | 0.270 | 0.305 |          |       |  | <i>SFTA3</i>     | 5'UTR   |
| cg15453836 | 15 | 77,711,506  | 2.46E-07 | 0.270 | 0.235 |          |       |  |                  |         |
| cg18599206 | 6  | 29,911,087  | 0.010515 | 0.270 | 0.141 |          |       |  | <i>HLA-A</i>     | Body    |
| cg18298920 | 5  | 3,607,033   | 7.07E-09 | 0.270 | 0.304 |          |       |  |                  |         |
| cg11216632 | 1  | 155,944,655 | 4.36E-08 | 0.270 | 0.240 |          |       |  | <i>ARHGEF2</i>   | Body    |
| cg16586594 | 16 | 8,806,569   | 1.87E-09 | 0.270 | 0.276 |          |       |  | <i>ABAT</i>      | 5'UTR   |
| cg05485379 | 3  | 197,121,410 | 3.98E-22 | 0.270 | 0.244 |          |       |  |                  |         |
| cg08370077 | 16 | 851,288     | 1.08E-07 | 0.270 | 0.271 |          |       |  | <i>GNG13</i>     | TSS1500 |
| cg10440639 | 17 | 154,499     | 0.003966 | 0.270 | 0.213 |          |       |  | <i>RPH3AL</i>    | Body    |
| cg10781468 | 6  | 168,778,312 | 9.53E-10 | 0.270 | 0.229 |          |       |  |                  |         |
| cg05222995 | 12 | 115,124,973 | 5.12E-10 | 0.270 | 0.241 |          |       |  |                  |         |
| cg20167366 | 6  | 30,094,980  | 1.76E-08 | 0.270 | 0.227 |          |       |  |                  |         |
| cg18639180 | 14 | 91,580,605  | 0.040349 | 0.270 | 0.086 |          |       |  | <i>C14orf159</i> | 1stExon |
| cg14299940 | 9  | 131,684,923 | 0.010321 | 0.270 | 0.278 |          |       |  | <i>PHYHD1</i>    | Body    |
| cg19571617 | 15 | 90,209,190  | 0.000926 | 0.270 | 0.170 |          |       |  | <i>PLIN1</i>     | Body    |
| cg19894975 | 17 | 76,355,674  | 7.91E-05 | 0.270 | 0.245 |          |       |  | <i>SOCS3</i>     | 5'UTR   |
| cg17067528 | 6  | 30,712,517  | 0.023597 | 0.270 | 0.250 | 1.54E-10 | 0.131 |  | <i>IER3</i>      | TSS200  |
| cg02745822 | 8  | 134,203,435 | 2.42E-14 | 0.270 | 0.271 |          |       |  | <i>WISP1</i>     | 1stExon |
| cg07048832 | 13 | 50,883,529  | 1.32E-05 | 0.270 | 0.239 |          |       |  |                  |         |
| cg10437217 | 6  | 33,215,814  | 3.46E-07 | 0.270 | 0.263 |          |       |  |                  |         |

|            |    |             |          |       |       |          |       |  |                |         |
|------------|----|-------------|----------|-------|-------|----------|-------|--|----------------|---------|
| cg14058647 | 9  | 88,137,909  | 0.00994  | 0.270 | 0.209 |          |       |  |                |         |
| cg03102442 | 8  | 125,738,432 | 3.97E-15 | 0.270 | 0.258 |          |       |  | <i>MTSS1</i>   | Body    |
| cg26503073 | 7  | 6,704,074   | 1.22E-09 | 0.270 | 0.242 |          |       |  |                |         |
| cg01240599 | 11 | 67,418,045  | 1.54E-10 | 0.270 | 0.285 |          |       |  | <i>ACY3</i>    | 5'UTR   |
| cg04270799 | 12 | 57,944,059  | 0.00062  | 0.270 | 0.207 | 1.12E-13 | 0.185 |  | <i>KIF5A</i>   | 1stExon |
| cg14013195 | 2  | 26,624,767  | 0.025583 | 0.270 | 0.063 |          |       |  | <i>C2orf39</i> | TSS200  |
| cg00950265 | 14 | 60,974,389  | 3.52E-08 | 0.270 | 0.238 |          |       |  |                |         |
| cg17169998 | 22 | 50,524,124  | 3.46E-05 | 0.270 | 0.270 | 1.75E-14 | 0.153 |  | <i>MLC1</i>    | TSS1500 |
| cg15213210 | 1  | 18,962,937  | 0.009523 | 0.270 | 0.265 |          |       |  | <i>PAX7</i>    | Body    |
| cg05328461 | 19 | 10,231,566  | 7.65E-18 | 0.270 | 0.264 |          |       |  | <i>EIF3G</i>   | TSS1500 |
| cg23052830 | 14 | 61,119,919  | 2.55E-05 | 0.270 | 0.314 |          |       |  |                |         |
| cg09980477 | 17 | 66,255,444  | 0.001722 | 0.270 | 0.279 |          |       |  | <i>ARSG</i>    | 5'UTR   |
| cg01075271 | 14 | 38,080,314  | 1.06E-06 | 0.270 | 0.313 |          |       |  |                |         |
| cg04203646 | 19 | 1,467,008   | 0.001673 | 0.270 | 0.267 |          |       |  | <i>APC2</i>    | Body    |
| cg15608483 | 2  | 175,192,815 | 7.01E-05 | 0.270 | 0.299 |          |       |  |                |         |
| cg20370678 | 17 | 58,216,297  | 0.000345 | 0.270 | 0.259 |          |       |  |                |         |
| cg22564583 | 22 | 37,720,976  | 0.003564 | 0.270 | 0.171 |          |       |  |                |         |
| cg17123338 | X  | 153,361,684 | 1.81E-05 | 0.270 | 0.245 |          |       |  | <i>MECP2</i>   | Body    |
| cg01152073 | 5  | 179,246,575 | 6.7E-10  | 0.270 | 0.235 |          |       |  | <i>SQSTM1</i>  | 5'UTR   |
| cg03322234 | 7  | 1,022,643   | 1.29E-21 | 0.270 | 0.261 |          |       |  | <i>CYP2W1</i>  | TSS200  |
| cg08972081 | 3  | 139,259,435 | 1.16E-06 | 0.270 | 0.292 |          |       |  | <i>RBP1</i>    | TSS1500 |
| cg26272623 | 1  | 119,532,320 | 5.31E-12 | 0.270 | 0.255 |          |       |  | <i>TBX15</i>   | TSS200  |
| cg00295744 | 1  | 151,689,985 | 0.001237 | 0.270 | 0.248 |          |       |  | <i>TNRC4</i>   | TSS1500 |
| cg25172243 | X  | 138,724,688 | 0.004375 | 0.270 | 0.267 |          |       |  | <i>MCF2</i>    | 1stExon |
| cg05382956 | 11 | 10,627,849  | 1.03E-09 | 0.270 | 0.270 |          |       |  | <i>MRVI1</i>   | Body    |
| cg09802835 | 11 | 71,952,131  | 7.57E-09 | 0.270 | 0.233 |          |       |  | <i>PHOX2A</i>  | Body    |
| cg23217097 | 14 | 42,074,635  | 1.99E-06 | 0.270 | 0.223 |          |       |  |                |         |
| cg05103064 | 10 | 7,311,500   | 0.002683 | 0.270 | 0.296 |          |       |  | <i>SFMBT2</i>  | Body    |
| cg07015424 | 7  | 124,360,326 | 1.17E-10 | 0.270 | 0.287 |          |       |  |                |         |
| cg20260127 | 7  | 56,355,681  | 1.08E-08 | 0.270 | 0.234 |          |       |  |                |         |
| cg14516948 | 22 | 42,196,187  | 0.006045 | 0.270 | 0.239 |          |       |  | <i>CCDC134</i> | TSS1500 |
| cg01757168 | 3  | 128,215,565 | 1.14E-23 | 0.270 | 0.238 |          |       |  |                |         |
| cg05589489 | 12 | 89,748,821  | 2.14E-11 | 0.270 | 0.257 |          |       |  |                |         |
| cg23094674 | 1  | 204,329,186 | 1.94E-21 | 0.270 | 0.257 |          |       |  | <i>PLEKHA6</i> | TSS200  |

|            |    |             |          |       |       |          |       |  |                 |         |
|------------|----|-------------|----------|-------|-------|----------|-------|--|-----------------|---------|
| cg13285968 | 2  | 180,725,645 | 3.82E-07 | 0.270 | 0.200 |          |       |  | <i>ZNF385B</i>  | 5'UTR   |
| cg01022780 | 3  | 48,598,236  | 5.7E-12  | 0.270 | 0.263 |          |       |  |                 |         |
| cg15054274 | 3  | 105,072,683 | 1.68E-06 | 0.270 | 0.287 |          |       |  |                 |         |
| cg05726600 | 7  | 150,498,594 | 1.02E-14 | 0.270 | 0.266 |          |       |  | <i>TMEM176B</i> | TSS200  |
| cg23187653 | 5  | 95,769,008  | 0.010887 | 0.270 | 0.244 | 1.55E-09 | 0.119 |  | <i>PCSK1</i>    | TSS200  |
| cg23634124 | 17 | 48,049,952  | 0.000231 | 0.270 | 0.195 |          |       |  | <i>DLX4</i>     | TSS200  |
| cg05331143 | 15 | 52,820,584  | 0.020337 | 0.270 | 0.135 |          |       |  | <i>MYO5A</i>    | Body    |
| cg11991617 | 4  | 153,512,727 | 0.020024 | 0.270 | 0.255 |          |       |  |                 |         |
| cg17177995 | 1  | 70,035,846  | 1.26E-08 | 0.270 | 0.276 |          |       |  |                 |         |
| cg12187586 | 17 | 2,627,661   | 0.024871 | 0.270 | 0.307 |          |       |  |                 |         |
| cg26433034 | 7  | 128,430,626 | 9.64E-09 | 0.270 | 0.260 |          |       |  | <i>CCDC136</i>  | TSS1500 |
| cg12189835 | 11 | 61,335,071  | 1.25E-05 | 0.270 | 0.174 |          |       |  | <i>SYT7</i>     | Body    |
| cg17146738 | 7  | 98,739,698  | 0.048517 | 0.270 | 0.266 |          |       |  | <i>SMURF1</i>   | Body    |
| cg07435331 | 17 | 21,178,476  | 1.21E-31 | 0.270 | 0.260 |          |       |  |                 |         |
| cg00851088 | 5  | 133,406,550 | 0.001852 | 0.270 | 0.140 |          |       |  |                 |         |
| cg03733219 | 19 | 38,886,319  | 4.32E-05 | 0.270 | 0.253 |          |       |  | <i>SPRED3</i>   | Body    |
| cg10758824 | 1  | 164,606,935 | 3.42E-14 | 0.270 | 0.261 |          |       |  | <i>PBX1</i>     | Body    |
| cg19923650 | 5  | 172,659,730 | 0.021268 | 0.270 | 0.423 |          |       |  | <i>NKX2-5</i>   | 3'UTR   |
| cg07209634 | 7  | 156,796,550 | 0.003502 | 0.270 | 0.213 |          |       |  |                 |         |
| cg08528170 | 19 | 13,947,914  | 4.24E-10 | 0.270 | 0.266 |          |       |  | <i>MIR24-2</i>  | TSS1500 |
| cg09044785 | 20 | 30,458,634  | 0.008972 | 0.270 | 0.178 |          |       |  | <i>TTL9</i>     | 5'UTR   |
| cg06110458 | 16 | 85,256,305  | 2.69E-07 | 0.270 | 0.279 |          |       |  |                 |         |
| cg03730428 | 11 | 32,009,004  | 0.000111 | 0.270 | 0.282 |          |       |  |                 |         |
| cg06523224 | 15 | 83,953,883  | 1.04E-05 | 0.270 | 0.255 |          |       |  | <i>BNC1</i>     | TSS1500 |
| cg18642503 | 19 | 14,089,711  | 0.000132 | 0.270 | 0.222 |          |       |  | <i>RFX1</i>     | Body    |
| cg00839584 | 2  | 113,542,091 | 5.13E-06 | 0.270 | 0.308 | 1.9E-30  | 0.229 |  | <i>IL1A</i>     | 1stExon |
| cg01558501 | X  | 99,667,223  | 0.002645 | 0.270 | 0.232 |          |       |  |                 |         |
| cg03039974 | 19 | 49,467,169  | 5.79E-05 | 0.270 | 0.288 |          |       |  | <i>FTL</i>      | TSS1500 |
| cg27529555 | 1  | 205,325,859 | 1.01E-13 | 0.270 | 0.266 |          |       |  | <i>KLHDC8A</i>  | 5'UTR   |
| cg12598089 | 3  | 156,008,770 | 2.5E-07  | 0.270 | 0.324 |          |       |  | <i>KCNAB1</i>   | TSS200  |
| cg13543436 | 9  | 79,488,657  | 2.12E-22 | 0.270 | 0.268 |          |       |  | <i>PRUNE2</i>   | Body    |
| cg02863073 | 19 | 39,694,831  | 0.034658 | 0.270 | 0.346 |          |       |  | <i>SYCN</i>     | 1stExon |
| cg14453201 | 5  | 320,888     | 0.033008 | 0.270 | 0.208 |          |       |  | <i>AHRR</i>     | Body    |
| cg19814981 | 5  | 3,592,435   | 8.01E-15 | 0.270 | 0.264 |          |       |  |                 |         |

|            |    |             |          |       |       |          |       |  |                 |         |
|------------|----|-------------|----------|-------|-------|----------|-------|--|-----------------|---------|
| cg06624337 | 15 | 47,477,411  | 0.003894 | 0.269 | 0.221 |          |       |  |                 |         |
| cg23209976 | 5  | 138,872,772 | 4.6E-08  | 0.269 | 0.292 |          |       |  |                 |         |
| cg02873954 | 21 | 45,161,415  | 9.19E-08 | 0.269 | 0.228 |          |       |  | <i>PDXK</i>     | Body    |
| cg23288059 | 14 | 38,724,945  | 7.06E-05 | 0.269 | 0.291 |          |       |  | <i>CLEC14A</i>  | 1stExon |
| cg02941781 | 2  | 191,045,563 | 0.000269 | 0.269 | 0.256 |          |       |  | <i>C2orf88</i>  | 5'UTR   |
| cg09414673 | 7  | 1,022,797   | 2.39E-16 | 0.269 | 0.251 |          |       |  | <i>CYP2W1</i>   | TSS200  |
| cg04726446 | 2  | 26,624,865  | 0.014728 | 0.269 | 0.075 | 2.73E-14 | 0.159 |  | <i>C2orf39</i>  | 1stExon |
| cg22004069 | 19 | 5,585,648   | 5.61E-19 | 0.269 | 0.247 |          |       |  |                 |         |
| cg24280832 | 10 | 77,871,958  | 1.94E-18 | 0.269 | 0.249 |          |       |  | <i>C10orf11</i> | Body    |
| cg24399924 | 2  | 85,980,533  | 0.002833 | 0.269 | 0.254 |          |       |  | <i>ATOH8</i>    | TSS1500 |
| cg06552366 | 2  | 161,263,994 | 3.07E-15 | 0.269 | 0.270 |          |       |  | <i>RBMS1</i>    | Body    |
| cg16068038 | 15 | 69,099,678  | 1.61E-08 | 0.269 | 0.268 |          |       |  | <i>C15orf28</i> | TSS1500 |
| cg26926612 | 1  | 214,153,294 | 0.000912 | 0.269 | 0.349 |          |       |  |                 |         |
| cg06846669 | 5  | 134,879,739 | 2.76E-08 | 0.269 | 0.265 |          |       |  |                 |         |
| cg06593715 | 3  | 42,814,427  | 2.28E-06 | 0.269 | 0.277 |          |       |  | <i>CCDC13</i>   | 5'UTR   |
| cg02026062 | 6  | 117,086,479 | 0.003999 | 0.269 | 0.287 |          |       |  | <i>FAM162B</i>  | Body    |
| cg04569152 | 14 | 21,555,603  | 5.62E-08 | 0.269 | 0.263 |          |       |  | <i>FLJ10357</i> | Body    |
| cg19764436 | 22 | 23,413,260  | 1.49E-07 | 0.269 | 0.175 | 2.15E-29 | 0.180 |  | <i>RTDR1</i>    | Body    |
| cg08944026 | 5  | 10,626,811  | 1.39E-15 | 0.269 | 0.245 |          |       |  | <i>ANKRD33B</i> | Body    |
| cg13874290 | 2  | 70,017,056  | 1.09E-07 | 0.269 | 0.259 |          |       |  | <i>ANXA4</i>    | Body    |
| cg01932956 | 16 | 22,959,525  | 0.002194 | 0.269 | 0.225 |          |       |  |                 |         |
| cg05604079 | 4  | 122,302,268 | 0.042664 | 0.269 | 0.250 |          |       |  | <i>QRFPR</i>    | TSS200  |
| cg01141339 | 5  | 72,530,198  | 1.04E-06 | 0.269 | 0.241 |          |       |  |                 |         |
| cg12064372 | 12 | 30,948,792  | 0.001258 | 0.269 | 0.260 |          |       |  |                 |         |
| cg09737314 | 17 | 6,899,359   | 1.04E-06 | 0.269 | 0.213 |          |       |  | <i>ALOX12</i>   | TSS200  |
| cg10911287 | 12 | 125,271,306 | 5.48E-15 | 0.269 | 0.239 |          |       |  | <i>SCARB1</i>   | Body    |
| cg00221494 | 13 | 98,794,593  | 2.61E-10 | 0.269 | 0.175 |          |       |  | <i>FARP1</i>    | TSS1500 |
| cg15686334 | 8  | 60,030,291  | 0.001138 | 0.269 | 0.251 |          |       |  | <i>TOX</i>      | Body    |
| cg13464990 | 9  | 135,421,719 | 0.008382 | 0.269 | 0.210 |          |       |  | <i>C9orf171</i> | Body    |
| cg16023415 | 1  | 20,692,812  | 0.02419  | 0.269 | 0.355 |          |       |  |                 |         |
| cg04122873 | 6  | 28,956,226  | 3.16E-06 | 0.269 | 0.264 |          |       |  |                 |         |
| cg15945129 | 7  | 120,629,051 | 0.001341 | 0.269 | 0.181 |          |       |  | <i>C7orf58</i>  | TSS1500 |
| cg22001208 | 19 | 18,782,374  | 1.26E-11 | 0.269 | 0.261 |          |       |  |                 |         |
| cg16555537 | 7  | 100,464,771 | 3.28E-08 | 0.269 | 0.295 |          |       |  | <i>TRIP6</i>    | TSS200  |

|            |    |             |          |       |       |          |       |  |                 |         |
|------------|----|-------------|----------|-------|-------|----------|-------|--|-----------------|---------|
| cg19616230 | 4  | 25,657,429  | 0.000859 | 0.269 | 0.154 | 3.79E-14 | 0.271 |  | <i>SLC34A2</i>  | TSS200  |
| cg21459969 | 19 | 36,343,521  | 4.82E-07 | 0.269 | 0.257 |          |       |  | <i>NPHS1</i>    | TSS1500 |
| cg13097407 | 6  | 43,276,658  | 0.039569 | 0.269 | 0.190 | 5.63E-21 | 0.185 |  | <i>CRIP3</i>    | TSS200  |
| cg20431191 | 1  | 86,043,795  | 7.77E-05 | 0.269 | 0.277 |          |       |  | <i>DDAH1</i>    | 1stExon |
| cg00247571 | 13 | 50,707,065  | 4.12E-05 | 0.269 | 0.260 |          |       |  |                 |         |
| cg05492660 | 2  | 71,205,564  | 0.019958 | 0.269 | 0.338 |          |       |  | <i>ANKRD53</i>  | TSS200  |
| cg13645732 | 19 | 45,901,649  | 0.00127  | 0.269 | 0.310 |          |       |  | <i>PPP1R13L</i> | 5'UTR   |
| cg08855938 | 1  | 214,398,483 | 1.36E-07 | 0.269 | 0.266 |          |       |  |                 |         |
| cg25864523 | 6  | 28,557,388  | 0.002609 | 0.269 | 0.214 |          |       |  |                 |         |
| cg27542552 | 19 | 11,689,488  | 2.04E-05 | 0.269 | 0.262 |          |       |  | <i>ACP5</i>     | TSS1500 |
| cg23740940 | 11 | 68,924,746  | 8.84E-13 | 0.269 | 0.267 |          |       |  |                 |         |
| cg21080336 | 6  | 10,426,657  | 0.00012  | 0.269 | 0.327 |          |       |  |                 |         |
| cg00158333 | 17 | 47,075,855  | 0.000205 | 0.269 | 0.219 |          |       |  | <i>IGF2BP1</i>  | Body    |
| cg15827779 | 14 | 103,524,899 | 0.001471 | 0.269 | 0.340 |          |       |  | <i>CDC42BPB</i> | TSS1500 |
| cg09599027 | X  | 43,745,111  | 3.37E-08 | 0.269 | 0.245 |          |       |  |                 |         |
| cg07461572 | 8  | 1,955,117   | 2.43E-14 | 0.269 | 0.251 |          |       |  |                 |         |
| cg08032924 | 16 | 66,613,096  | 2.04E-07 | 0.269 | 0.249 |          |       |  | <i>CMTM2</i>    | TSS1500 |
| cg01255894 | 10 | 8,099,218   | 3.42E-12 | 0.269 | 0.278 |          |       |  | <i>GATA3</i>    | Body    |
| cg04011829 | 20 | 61,275,033  | 2.47E-09 | 0.269 | 0.256 |          |       |  | <i>SLCO4A1</i>  | 5'UTR   |
| cg08043998 | 12 | 121,890,503 | 4E-10    | 0.269 | 0.274 |          |       |  | <i>KDM2B</i>    | Body    |
| cg26127662 | 7  | 27,153,944  | 5.37E-06 | 0.269 | 0.214 |          |       |  | <i>HOXA3</i>    | 5'UTR   |
| cg08312412 | 5  | 141,443,781 | 1.7E-07  | 0.269 | 0.273 |          |       |  |                 |         |
| cg22675801 | 7  | 28,998,346  | 4.87E-05 | 0.269 | 0.199 |          |       |  | <i>TRIL</i>     | TSS1500 |
| cg03699566 | 11 | 71,900,652  | 1.04E-14 | 0.269 | 0.265 | 6.61E-21 | 0.167 |  | <i>FOLR1</i>    | 1stExon |
| cg22508969 | 6  | 55,444,091  | 0.028594 | 0.269 | 0.271 |          |       |  | <i>HMGCLL1</i>  | TSS200  |
| cg04562217 | 3  | 79,815,718  | 0.000307 | 0.269 | 0.225 |          |       |  | <i>ROBO1</i>    | 5'UTR   |
| cg20902817 | 15 | 30,277,796  | 2.88E-06 | 0.269 | 0.258 |          |       |  |                 |         |
| cg19304410 | 1  | 64,971,188  | 0.001151 | 0.269 | 0.289 | 3.65E-21 | 0.147 |  | <i>CACHD1</i>   | Body    |
| cg00939682 | 10 | 16,933,505  | 9.82E-05 | 0.269 | 0.266 |          |       |  | <i>CUBN</i>     | Body    |
| cg02474563 | 10 | 134,442,032 | 1.59E-06 | 0.269 | 0.261 |          |       |  | <i>INPP5A</i>   | Body    |
| cg02857325 | 16 | 86,564,928  | 2.59E-06 | 0.269 | 0.257 |          |       |  | <i>MTHFSD</i>   | 3'UTR   |
| cg22224704 | 11 | 67,352,041  | 1.05E-14 | 0.269 | 0.259 | 2.08E-21 | 0.165 |  | <i>GSTP1</i>    | Body    |
| cg01286319 | 19 | 2,695,343   | 3.8E-06  | 0.269 | 0.259 |          |       |  | <i>GNG7</i>     | 5'UTR   |
| cg00901320 | 12 | 129,338,534 | 0.006798 | 0.269 | 0.175 |          |       |  | <i>GLT1D1</i>   | Body    |

|            |    |             |          |       |       |          |       |  |     |                 |         |
|------------|----|-------------|----------|-------|-------|----------|-------|--|-----|-----------------|---------|
| cg26199241 | 17 | 59,529,486  | 9.05E-06 | 0.269 | 0.273 |          |       |  |     |                 |         |
| cg27062571 | 8  | 124,890,314 | 5.44E-06 | 0.269 | 0.283 |          |       |  |     | <i>FER1L6</i>   | 5'UTR   |
| cg01850179 | 19 | 10,340,795  | 3.33E-10 | 0.269 | 0.272 |          |       |  |     | <i>S1PR2</i>    | 5'UTR   |
| cg00907288 | 3  | 9,178,249   | 8.21E-06 | 0.269 | 0.279 |          |       |  |     | <i>SRGAP3</i>   | Body    |
| cg23052826 | 2  | 232,479,675 | 1.3E-05  | 0.269 | 0.274 |          |       |  |     |                 |         |
| cg00459232 | 12 | 6,309,025   | 1.17E-06 | 0.269 | 0.272 |          |       |  |     | <i>CD9</i>      | TSS1500 |
| cg12356951 | 17 | 35,165,018  | 0.00075  | 0.269 | 0.243 |          |       |  |     |                 |         |
| cg01428589 | 19 | 33,167,718  | 1.18E-08 | 0.269 | 0.264 |          |       |  |     | <i>RGS9BP</i>   | 1stExon |
| cg18831409 | 6  | 10,585,851  | 3.73E-19 | 0.269 | 0.265 |          |       |  | Yes | <i>GCNT2</i>    | Body    |
| cg19376851 | 2  | 200,334,137 | 0.004678 | 0.269 | 0.314 |          |       |  |     | <i>FLJ32063</i> | Body    |
| cg03678566 | 11 | 68,106,018  | 2.07E-16 | 0.269 | 0.270 |          |       |  |     | <i>LRP5</i>     | Body    |
| cg08802482 | 7  | 2,657,119   | 1.39E-18 | 0.269 | 0.258 |          |       |  |     |                 |         |
| cg10395685 | 11 | 86,085,715  | 5.78E-06 | 0.269 | 0.261 |          |       |  |     | <i>CCDC81</i>   | TSS200  |
| cg12065285 | 1  | 155,946,346 | 1.61E-20 | 0.269 | 0.275 |          |       |  |     | <i>ARHGEF2</i>  | Body    |
| cg15639581 | 19 | 13,318,873  | 3.61E-06 | 0.269 | 0.275 |          |       |  |     | <i>CACNA1A</i>  | Body    |
| cg17835180 | X  | 12,995,592  | 0.000619 | 0.269 | 0.288 |          |       |  |     |                 |         |
| cg01762581 | 8  | 42,234,614  | 3.65E-11 | 0.269 | 0.246 | 1.7E-22  | 0.206 |  |     | <i>DKK4</i>     | 5'UTR   |
| cg27456468 | 2  | 200,334,001 | 1.54E-06 | 0.269 | 0.238 |          |       |  |     | <i>FLJ32063</i> | Body    |
| cg16564033 | 21 | 38,067,741  | 0.004422 | 0.269 | 0.313 |          |       |  |     |                 |         |
| cg24848599 | 1  | 228,604,800 | 1.41E-05 | 0.269 | 0.255 |          |       |  |     | <i>TRIM17</i>   | TSS1500 |
| cg09396217 | 8  | 108,510,286 | 2.5E-13  | 0.269 | 0.276 | 2.22E-12 | 0.167 |  |     | <i>ANGPT1</i>   | TSS200  |
| cg17280299 | 5  | 132,082,690 | 3.15E-08 | 0.269 | 0.263 |          |       |  |     | <i>CCNI2</i>    | TSS1500 |
| cg21268578 | 22 | 38,029,478  | 3.38E-09 | 0.269 | 0.260 |          |       |  |     | <i>GGA1</i>     | 3'UTR   |
| cg21743907 | 7  | 129,423,053 | 2.9E-06  | 0.269 | 0.269 |          |       |  | Yes |                 |         |
| cg03522245 | 20 | 25,566,470  | 0.003897 | 0.269 | 0.184 |          |       |  |     | <i>NINL</i>     | TSS1500 |
| cg17681491 | 10 | 123,356,205 | 0.000291 | 0.269 | 0.222 |          |       |  |     | <i>FGFR2</i>    | 5'UTR   |
| cg12839172 | 4  | 16,085,077  | 0.015764 | 0.269 | 0.344 |          |       |  |     | <i>PROM1</i>    | 5'UTR   |
| cg23644624 | 22 | 21,386,989  | 0.017549 | 0.269 | 0.069 |          |       |  |     | <i>SLC7A4</i>   | TSS200  |
| cg25769889 | 18 | 28,620,915  | 0.001502 | 0.269 | 0.224 |          |       |  |     | <i>DSC3</i>     | Body    |
| cg04539503 | 19 | 34,311,327  | 0.007218 | 0.269 | 0.216 |          |       |  |     |                 |         |
| cg13383058 | 11 | 66,084,660  | 1.09E-05 | 0.269 | 0.313 |          |       |  |     | <i>CD248</i>    | TSS200  |
| cg14476745 | 9  | 124,979,356 | 1.06E-18 | 0.269 | 0.265 |          |       |  |     | <i>LHX6</i>     | Body    |
| cg06818307 | 20 | 6,750,782   | 0.030315 | 0.269 | 0.238 |          |       |  |     | <i>BMP2</i>     | Body    |
| cg22881247 | 15 | 101,460,222 | 0.02789  | 0.269 | 0.140 |          |       |  |     | <i>LRRK1</i>    | 5'UTR   |

|            |    |             |          |       |       |          |       |     |                 |         |
|------------|----|-------------|----------|-------|-------|----------|-------|-----|-----------------|---------|
| cg16519300 | 1  | 16,084,830  | 0.000297 | 0.269 | 0.319 |          |       |     | <i>FBLIM1</i>   | TSS1500 |
| cg19827182 | 1  | 21,640,802  | 9.12E-20 | 0.269 | 0.264 |          |       |     | <i>ECE1</i>     | Body    |
| cg01092108 | 5  | 33,362,853  | 2.76E-10 | 0.269 | 0.273 |          |       |     |                 |         |
| cg17415326 | 1  | 79,350,918  | 3.41E-16 | 0.269 | 0.255 |          |       |     |                 |         |
| cg27323784 | 11 | 116,451,730 | 0.025017 | 0.269 | 0.297 |          |       |     |                 |         |
| cg15522171 | 1  | 33,547,626  | 1.47E-06 | 0.269 | 0.270 |          |       |     | <i>ADC</i>      | 5'UTR   |
| cg17241776 | 13 | 51,417,469  | 2.65E-05 | 0.269 | 0.260 |          |       |     | <i>DLEU7</i>    | 1stExon |
| cg25171685 | 15 | 63,334,355  | 0.008585 | 0.268 | 0.212 |          |       |     | <i>TPM1</i>     | TSS1500 |
| cg03580358 | 8  | 41,981,423  | 3.29E-07 | 0.268 | 0.244 |          |       |     |                 |         |
| cg04646987 | 5  | 14,406,732  | 5.66E-15 | 0.268 | 0.257 |          |       |     | <i>TRIO</i>     | Body    |
| cg11765288 | 7  | 18,535,767  | 0.00401  | 0.268 | 0.238 |          |       |     | <i>HDAC9</i>    | TSS200  |
| cg16742874 | 10 | 77,055,847  | 0.001175 | 0.268 | 0.218 |          |       |     |                 |         |
| cg25017060 | 14 | 103,389,017 | 2.56E-06 | 0.268 | 0.232 |          |       |     | <i>AMN</i>      | 1stExon |
| cg27485906 | 13 | 42,136,511  | 6.04E-09 | 0.268 | 0.273 |          |       |     |                 |         |
| cg05872387 | 2  | 242,716,801 | 2.89E-20 | 0.268 | 0.249 |          |       |     | <i>GAL3ST2</i>  | Body    |
| cg09236382 | 11 | 6,676,366   | 5.31E-13 | 0.268 | 0.220 |          |       |     | <i>DCHS1</i>    | 5'UTR   |
| cg12099952 | 20 | 3,053,037   | 0.022232 | 0.268 | 0.172 |          |       |     | <i>OXT</i>      | Body    |
| cg14204462 | 1  | 119,540,044 | 1.24E-05 | 0.268 | 0.242 |          |       |     |                 |         |
| cg01447112 | 7  | 6,703,803   | 0.036702 | 0.268 | 0.249 |          |       |     |                 |         |
| cg21750887 | 8  | 68,658,237  | 2.64E-11 | 0.268 | 0.246 | 9.63E-26 | 0.203 |     | <i>CPA6</i>     | Body    |
| cg07034362 | 3  | 125,899,552 | 0.03964  | 0.268 | 0.175 |          |       |     | <i>ALDH1L1</i>  | TSS200  |
| cg21944234 | 3  | 177,234,095 | 6.09E-15 | 0.268 | 0.271 |          |       |     |                 |         |
| cg00850068 | 19 | 8,428,494   | 0.0035   | 0.268 | 0.200 |          |       |     | <i>ANGPTL4</i>  | TSS1500 |
| cg02290168 | 1  | 151,255,971 | 1.49E-05 | 0.268 | 0.249 |          |       |     | <i>ZNF687</i>   | 5'UTR   |
| cg02963866 | 15 | 29,612,015  | 5.32E-17 | 0.268 | 0.275 |          |       |     | <i>FAM189A1</i> | Body    |
| cg11009362 | 12 | 118,313,924 | 8.64E-07 | 0.268 | 0.253 |          |       |     | <i>KSR2</i>     | Body    |
| cg14141880 | 7  | 47,649,923  | 2.53E-18 | 0.268 | 0.262 |          |       | Yes |                 |         |
| cg27246129 | 6  | 170,595,947 | 8.4E-10  | 0.268 | 0.246 |          |       |     | <i>DLL1</i>     | Body    |
| cg12484113 | 1  | 27,898,757  | 2.27E-07 | 0.268 | 0.308 |          |       |     | <i>AHDC1</i>    | 5'UTR   |
| cg11052668 | 6  | 28,626,564  | 0.011572 | 0.268 | 0.270 |          |       |     |                 |         |
| cg14233604 | 9  | 83,412,508  | 5.63E-19 | 0.268 | 0.256 |          |       |     |                 |         |
| cg05037662 | 16 | 25,704,296  | 6.02E-05 | 0.268 | 0.293 |          |       |     | <i>HS3ST4</i>   | 1stExon |
| cg06720669 | X  | 108,868,282 | 0.00027  | 0.268 | 0.309 |          |       |     | <i>KCNE1L</i>   | 1stExon |
| cg06148175 | 11 | 67,418,148  | 1.87E-09 | 0.268 | 0.262 | 1.13E-09 | 0.099 |     | <i>ACY3</i>     | TSS200  |

|            |    |             |          |       |       |  |  |     |                  |         |
|------------|----|-------------|----------|-------|-------|--|--|-----|------------------|---------|
| cg11862551 | 6  | 29,817,963  | 0.007123 | 0.268 | 0.298 |  |  |     |                  |         |
| cg14926717 | 14 | 62,583,919  | 0.018828 | 0.268 | 0.333 |  |  |     | <i>FLI43390</i>  | TSS200  |
| cg10436257 | 16 | 30,959,496  | 1.17E-16 | 0.268 | 0.251 |  |  |     | <i>FBXL19</i>    | 3'UTR   |
| cg27429195 | 10 | 1,602,108   | 0.001079 | 0.268 | 0.329 |  |  |     | <i>ADARB2</i>    | Body    |
| cg26907842 | 9  | 37,036,052  | 0.00901  | 0.268 | 0.295 |  |  |     |                  |         |
| cg00204782 | 22 | 19,753,364  | 9.19E-06 | 0.268 | 0.225 |  |  |     | <i>TBX1</i>      | Body    |
| cg01919401 | 7  | 130,985,828 | 5E-07    | 0.268 | 0.327 |  |  |     | <i>MKLN1</i>     | Body    |
| cg14002960 | 18 | 31,739,423  | 0.038854 | 0.268 | 0.362 |  |  |     | <i>NOL4</i>      | Body    |
| cg15025103 | 5  | 177,411,380 | 1.12E-06 | 0.268 | 0.267 |  |  |     |                  |         |
| cg13187764 | 6  | 28,677,521  | 0.002351 | 0.268 | 0.291 |  |  |     |                  |         |
| cg04809274 | 6  | 32,977,254  | 0.000897 | 0.268 | 0.253 |  |  |     | <i>HLA-DOA</i>   | 1stExon |
| cg23079727 | 3  | 11,598,978  | 2.25E-13 | 0.268 | 0.275 |  |  |     | <i>VGLL4</i>     | 3'UTR   |
| cg18197392 | 20 | 23,015,908  | 0.009134 | 0.268 | 0.244 |  |  |     | <i>SSTR4</i>     | TSS200  |
| cg23973417 | 7  | 116,164,753 | 0.026973 | 0.268 | 0.218 |  |  |     | <i>CAV1</i>      | TSS200  |
| cg06469229 | 5  | 59,188,213  | 7.95E-09 | 0.268 | 0.253 |  |  |     | <i>PDE4D</i>     | Body    |
| cg21514834 | 2  | 132,285,991 | 0.003087 | 0.268 | 0.173 |  |  |     | <i>CCDC74A</i>   | Body    |
| cg03452737 | 3  | 117,385,277 | 1.17E-08 | 0.268 | 0.268 |  |  |     |                  |         |
| cg16290866 | 8  | 97,167,768  | 1.67E-07 | 0.268 | 0.245 |  |  |     | <i>GDF6</i>      | Body    |
| cg18058747 | 5  | 78,408,253  | 1.6E-12  | 0.268 | 0.266 |  |  |     | <i>BHMT</i>      | Body    |
| cg22982570 | 3  | 51,997,033  | 9.83E-17 | 0.268 | 0.253 |  |  |     | <i>PCBP4</i>     | TSS200  |
| cg13592721 | 6  | 27,107,393  | 2.33E-06 | 0.268 | 0.263 |  |  | Yes | <i>HIST1H2BK</i> | 3'UTR   |
| cg21386766 | 12 | 94,286,778  | 1.05E-05 | 0.268 | 0.217 |  |  |     |                  |         |
| cg03557857 | 10 | 103,589,693 | 6.5E-05  | 0.268 | 0.251 |  |  |     | <i>KCNIP2</i>    | Body    |
| cg09982773 | 7  | 128,550,860 | 4.39E-16 | 0.268 | 0.244 |  |  |     | <i>KCP</i>       | TSS200  |
| cg13123927 | 4  | 41,746,697  | 1.96E-05 | 0.268 | 0.255 |  |  |     | <i>PHOX2B</i>    | 3'UTR   |
| cg26276327 | 1  | 247,511,469 | 4.27E-05 | 0.268 | 0.243 |  |  |     |                  |         |
| cg08828819 | 7  | 95,025,836  | 0.037614 | 0.268 | 0.242 |  |  |     | <i>PON3</i>      | TSS200  |
| cg03233426 | 17 | 53,800,554  | 0.001922 | 0.268 | 0.295 |  |  |     | <i>TMEM100</i>   | TSS1500 |
| cg01466741 | 5  | 134,733,519 | 0.000172 | 0.268 | 0.339 |  |  |     | <i>H2AFY</i>     | 5'UTR   |
| cg14702307 | 7  | 64,700,697  | 3.78E-06 | 0.268 | 0.196 |  |  |     |                  |         |
| cg06641357 | 16 | 29,197,753  | 2.21E-10 | 0.268 | 0.282 |  |  |     |                  |         |
| cg26168881 | 2  | 9,451,170   | 0.015719 | 0.268 | 0.263 |  |  |     | <i>ASAP2</i>     | Body    |
| cg09547226 | 19 | 5,058,863   | 1.53E-21 | 0.268 | 0.243 |  |  | Yes | <i>KDM4B</i>     | Body    |
| cg21618620 | 12 | 54,408,427  | 4.76E-09 | 0.268 | 0.255 |  |  |     |                  |         |



|            |    |             |          |       |       |          |       |     |                     |         |
|------------|----|-------------|----------|-------|-------|----------|-------|-----|---------------------|---------|
| cg25370416 | 11 | 68,894,672  | 1.02E-11 | 0.268 | 0.257 |          |       |     |                     |         |
| cg09113070 | 2  | 86,114,036  | 2.24E-09 | 0.268 | 0.280 |          |       |     | <i>ST3GAL5</i>      | Body    |
| cg14248106 | 17 | 43,046,371  | 0.007112 | 0.268 | 0.146 |          |       |     | <i>C1QL1</i>        | TSS1500 |
| cg03745372 | 3  | 57,197,870  | 9.18E-09 | 0.268 | 0.258 |          |       |     | <i>IL17RD</i>       | Body    |
| cg04297907 | X  | 10,126,668  | 0.000221 | 0.268 | 0.253 |          |       |     | <i>CLCN4</i>        | 5'UTR   |
| cg13094752 | 14 | 23,305,548  | 7.04E-06 | 0.268 | 0.298 |          |       |     | <i>MMP14</i>        | TSS1500 |
| cg20406460 | 5  | 3,606,489   | 0.005936 | 0.268 | 0.381 |          |       |     |                     |         |
| cg20719001 | 17 | 79,297,435  | 5.99E-11 | 0.268 | 0.267 |          |       |     | <i>TMEM105</i>      | 5'UTR   |
| cg21447550 | 1  | 223,538,623 | 0.001306 | 0.268 | 0.202 |          |       |     | <i>SUSD4</i>        | TSS1500 |
| cg01215761 | X  | 129,254,804 | 0.045861 | 0.268 | 0.379 |          |       |     |                     |         |
| cg12749132 | 1  | 151,811,364 | 3.24E-05 | 0.268 | 0.278 |          |       |     | <i>LOC100132111</i> | Body    |
| cg23291534 | 8  | 110,988,043 | 0.014326 | 0.268 | 0.343 |          |       |     | <i>KCNV1</i>        | TSS1500 |
| cg07571734 | 7  | 151,479,894 | 1.08E-05 | 0.268 | 0.276 |          |       |     | <i>PRKAG2</i>       | Body    |
| cg03847373 | 5  | 50,265,767  | 0.006565 | 0.268 | 0.248 |          |       |     |                     |         |
| cg10771480 | 14 | 64,319,275  | 0.0151   | 0.268 | 0.162 |          |       |     | <i>SYNE2</i>        | TSS1500 |
| cg16348470 | 1  | 34,642,609  | 0.013222 | 0.268 | 0.192 |          |       |     | <i>C1orf94</i>      | 5'UTR   |
| cg19572766 | 17 | 48,206,424  | 1.05E-06 | 0.268 | 0.272 |          |       |     | <i>SAMD14</i>       | 5'UTR   |
| cg24313597 | 9  | 93,955,675  | 0.025249 | 0.268 | 0.133 |          |       |     |                     |         |
| cg04305062 | 6  | 39,399,200  | 0.000707 | 0.268 | 0.213 |          |       |     | <i>KIF6</i>         | Body    |
| cg10110367 | 21 | 46,131,464  | 3.68E-05 | 0.268 | 0.244 |          |       |     | <i>C21orf29</i>     | 1stExon |
| cg16269733 | 1  | 156,616,804 | 0.0211   | 0.268 | 0.264 |          |       |     | <i>BCAN</i>         | Body    |
| cg19541697 | 2  | 26,045,189  | 1.79E-23 | 0.268 | 0.254 |          |       |     | <i>ASXL2</i>        | Body    |
| cg21604042 | 6  | 35,181,401  | 8.15E-07 | 0.268 | 0.169 | 2.62E-09 | 0.168 |     | <i>SCUBE3</i>       | TSS1500 |
| cg04918402 | 17 | 61,778,550  | 2.05E-07 | 0.268 | 0.254 |          |       |     | <i>LIMD2</i>        | TSS1500 |
| cg26864766 | 1  | 39,857,950  | 7.22E-05 | 0.268 | 0.268 |          |       | Yes | <i>MACF1</i>        | Body    |
| cg08402963 | 13 | 99,135,625  | 0.002935 | 0.268 | 0.191 |          |       |     | <i>STK24</i>        | Body    |
| cg25092838 | 14 | 57,279,115  | 0.00173  | 0.268 | 0.296 |          |       |     | <i>OTX2OS1</i>      | TSS1500 |
| cg15192750 | 16 | 69,999,425  | 0.023071 | 0.268 | 0.268 |          |       |     |                     |         |
| cg14126020 | 20 | 61,149,009  | 0.001758 | 0.268 | 0.297 |          |       |     | <i>C20orf166</i>    | 5'UTR   |
| cg18693395 | 14 | 52,735,421  | 0.022408 | 0.268 | 0.275 |          |       |     | <i>PTGDR</i>        | Body    |
| cg10631356 | 11 | 34,517,541  | 3.86E-20 | 0.268 | 0.268 |          |       |     | <i>ELF5</i>         | Body    |
| cg23764900 | 11 | 8,616,102   | 0.00118  | 0.268 | 0.105 |          |       |     | <i>STK33</i>        | TSS1500 |
| cg06086731 | 1  | 38,942,075  | 0.000437 | 0.268 | 0.297 |          |       |     |                     |         |
| cg08125125 | 5  | 149,980,486 | 2.02E-06 | 0.268 | 0.261 |          |       |     | <i>SYNPO</i>        | TSS200  |

|            |    |             |          |       |       |          |       |  |                 |         |
|------------|----|-------------|----------|-------|-------|----------|-------|--|-----------------|---------|
| cg13475583 | 1  | 235,116,731 | 0.000779 | 0.268 | 0.266 |          |       |  |                 |         |
| cg03281661 | 16 | 3,239,458   | 1.28E-07 | 0.268 | 0.285 |          |       |  |                 |         |
| cg06666025 | 16 | 66,613,278  | 5.85E-07 | 0.268 | 0.225 |          |       |  | <i>CMTM2</i>    | TSS200  |
| cg17826344 | 19 | 51,169,660  | 0.000356 | 0.268 | 0.299 |          |       |  | <i>SHANK1</i>   | Body    |
| cg26663490 | 17 | 72,443,066  | 3.88E-10 | 0.268 | 0.274 |          |       |  | <i>GPRC5C</i>   | Body    |
| cg12460870 | 7  | 1,293,669   | 2.17E-09 | 0.268 | 0.276 |          |       |  |                 |         |
| cg02220617 | 14 | 102,312,533 | 3.46E-09 | 0.268 | 0.232 |          |       |  | <i>PPP2R5C</i>  | Body    |
| cg12905836 | 12 | 54,409,770  | 5.56E-07 | 0.268 | 0.233 |          |       |  | <i>HOXC4</i>    | TSS1500 |
| cg23039195 | 10 | 22,624,663  | 0.003893 | 0.268 | 0.321 |          |       |  |                 |         |
| cg05816193 | 6  | 26,018,127  | 2.94E-07 | 0.268 | 0.230 |          |       |  | <i>HIST1H1A</i> | TSS200  |
| cg07776847 | 4  | 140,201,065 | 0.000869 | 0.268 | 0.240 |          |       |  | <i>C4orf49</i>  | Body    |
| cg08893692 | 5  | 72,595,741  | 0.011698 | 0.268 | 0.272 |          |       |  |                 |         |
| cg27478242 | 12 | 54,611,928  | 1.88E-05 | 0.268 | 0.285 |          |       |  |                 |         |
| cg15850851 | 2  | 43,446,987  | 0.018052 | 0.268 | 0.193 |          |       |  |                 |         |
| cg07774424 | X  | 101,915,091 | 0.000957 | 0.268 | 0.276 |          |       |  |                 |         |
| cg24366211 | 11 | 68,610,706  | 5.57E-06 | 0.268 | 0.269 |          |       |  | <i>CPT1A</i>    | TSS1500 |
| cg01427848 | 11 | 56,972,618  | 0.019474 | 0.268 | 0.248 |          |       |  |                 |         |
| cg05713206 | 17 | 61,615,622  | 2.86E-08 | 0.268 | 0.245 |          |       |  | <i>KCNH6</i>    | Body    |
| cg10338338 | 12 | 8,088,931   | 5.33E-09 | 0.268 | 0.278 | 1.51E-19 | 0.148 |  | <i>SLC2A3</i>   | TSS200  |
| cg07005067 | 13 | 31,782,610  | 1.16E-14 | 0.268 | 0.262 |          |       |  | <i>B3GALTL</i>  | Body    |
| cg08506654 | 5  | 172,673,098 | 5.75E-07 | 0.268 | 0.274 |          |       |  |                 |         |
| cg14396995 | 7  | 42,278,089  | 1.42E-08 | 0.268 | 0.256 |          |       |  | <i>GLI3</i>     | TSS1500 |
| cg00766964 | 13 | 24,693,844  | 4.19E-10 | 0.268 | 0.252 |          |       |  |                 |         |
| cg03573945 | 8  | 25,897,342  | 5.97E-06 | 0.268 | 0.238 |          |       |  | <i>EBF2</i>     | Body    |
| cg06133145 | 14 | 94,254,351  | 2.39E-10 | 0.268 | 0.260 |          |       |  | <i>PRIMA1</i>   | 5'UTR   |
| cg18048405 | 17 | 27,333,617  | 0.000338 | 0.268 | 0.270 |          |       |  | <i>SEZ6</i>     | TSS1500 |
| cg22254104 | 9  | 124,991,432 | 0.000107 | 0.268 | 0.194 |          |       |  | <i>LHX6</i>     | TSS1500 |
| cg15175162 | 4  | 15,657,657  | 9.76E-07 | 0.268 | 0.201 |          |       |  | <i>FBXL5</i>    | TSS1500 |
| cg22558825 | 10 | 103,329,449 | 1.15E-07 | 0.268 | 0.236 |          |       |  |                 |         |
| cg03513464 | 1  | 58,898,672  | 1.13E-05 | 0.268 | 0.167 |          |       |  |                 |         |
| cg26198700 | 5  | 42,360,789  | 5.69E-05 | 0.268 | 0.243 |          |       |  |                 |         |
| cg02092885 | 17 | 29,379,458  | 1.1E-14  | 0.268 | 0.252 |          |       |  |                 |         |
| cg08378830 | 5  | 134,825,466 | 8.01E-07 | 0.268 | 0.272 |          |       |  |                 |         |
| cg04318855 | 2  | 225,906,085 | 0.000611 | 0.268 | 0.326 |          |       |  | <i>DOCK10</i>   | Body    |

|            |    |             |          |       |       |  |  |  |                 |         |
|------------|----|-------------|----------|-------|-------|--|--|--|-----------------|---------|
| cg05062333 | 6  | 133,562,269 | 8.49E-05 | 0.268 | 0.317 |  |  |  | <i>EYA4</i>     | TSS1500 |
| cg04155289 | 7  | 94,953,770  | 2.22E-10 | 0.267 | 0.252 |  |  |  | <i>PON1</i>     | 1stExon |
| cg15635368 | 2  | 191,208,116 | 0.002523 | 0.267 | 0.174 |  |  |  | <i>INPP1</i>    | TSS200  |
| cg25731261 | 19 | 47,736,018  | 9.31E-07 | 0.267 | 0.290 |  |  |  | <i>BBC3</i>     | 1stExon |
| cg00502662 | 7  | 76,053,224  | 6.76E-22 | 0.267 | 0.251 |  |  |  | <i>ZP3</i>      | TSS1500 |
| cg17594131 | 17 | 43,046,361  | 0.003908 | 0.267 | 0.161 |  |  |  | <i>C1QL1</i>    | TSS1500 |
| cg21570209 | 19 | 46,367,987  | 7.85E-08 | 0.267 | 0.251 |  |  |  | <i>FOXA3</i>    | Body    |
| cg04573550 | 14 | 38,680,313  | 3.56E-05 | 0.267 | 0.167 |  |  |  | <i>SSTR1</i>    | 3'UTR   |
| cg10996258 | 14 | 38,975,251  | 1.01E-05 | 0.267 | 0.267 |  |  |  |                 |         |
| cg13073564 | 4  | 8,508,604   | 1.85E-07 | 0.267 | 0.293 |  |  |  |                 |         |
| cg04896949 | 1  | 28,918,475  | 6.49E-12 | 0.267 | 0.242 |  |  |  | <i>RAB42</i>    | TSS1500 |
| cg06629130 | 18 | 44,787,585  | 0.0008   | 0.267 | 0.242 |  |  |  |                 |         |
| cg14673722 | 17 | 71,065,768  | 3.76E-17 | 0.267 | 0.269 |  |  |  | <i>SLC39A11</i> | Body    |
| cg20693209 | 11 | 13,984,067  | 2.97E-07 | 0.267 | 0.217 |  |  |  | <i>SPON1</i>    | 1stExon |
| cg05342515 | 2  | 177,024,172 | 1.39E-05 | 0.267 | 0.219 |  |  |  |                 |         |
| cg02319354 | 5  | 72,530,186  | 2.02E-07 | 0.267 | 0.231 |  |  |  |                 |         |
| cg06907053 | 2  | 106,015,869 | 5.16E-05 | 0.267 | 0.218 |  |  |  | <i>FHL2</i>     | TSS200  |
| cg07300846 | 16 | 29,888,571  | 1.09E-05 | 0.267 | 0.266 |  |  |  | <i>SEZ6L2</i>   | Body    |
| cg12026967 | 18 | 19,780,728  | 4.28E-44 | 0.267 | 0.253 |  |  |  | <i>GATA6</i>    | Body    |
| cg19486070 | 7  | 1,626,153   | 0.001393 | 0.267 | 0.235 |  |  |  | <i>KIAA1908</i> | Body    |
| cg26559209 | 10 | 13,570,012  | 0.000193 | 0.267 | 0.255 |  |  |  |                 |         |
| cg03387092 | 3  | 123,493,248 | 7.81E-17 | 0.267 | 0.265 |  |  |  | <i>MYLK</i>     | Body    |
| cg19798881 | 6  | 7,758,958   | 9.91E-15 | 0.267 | 0.257 |  |  |  | <i>BMP6</i>     | Body    |
| cg11619961 | 5  | 149,792,840 | 0.000813 | 0.267 | 0.119 |  |  |  | <i>CD74</i>     | TSS1500 |
| cg22592475 | 5  | 67,547,334  | 4.05E-09 | 0.267 | 0.244 |  |  |  | <i>PIK3R1</i>   | Body    |
| cg14710465 | 1  | 160,369,869 | 3.3E-23  | 0.267 | 0.231 |  |  |  | <i>VANGL2</i>   | TSS1500 |
| cg05185021 | 17 | 2,324,794   | 2.04E-14 | 0.267 | 0.267 |  |  |  | <i>METT10D</i>  | Body    |
| cg20316549 | 7  | 156,810,507 | 0.0006   | 0.267 | 0.271 |  |  |  |                 |         |
| cg26365925 | 3  | 44,063,315  | 0.000144 | 0.267 | 0.269 |  |  |  |                 |         |
| cg13001963 | 5  | 10,467,973  | 5.36E-09 | 0.267 | 0.251 |  |  |  |                 |         |
| cg12580156 | 10 | 112,588,051 | 1.12E-35 | 0.267 | 0.258 |  |  |  | <i>RBM20</i>    | Body    |
| cg05184938 | 17 | 75,369,939  | 6.98E-05 | 0.267 | 0.221 |  |  |  | <i>SEPT9</i>    | 5'UTR   |
| cg06861044 | 16 | 20,359,815  | 0.046602 | 0.267 | 0.361 |  |  |  | <i>UMOD</i>     | Body    |
| cg06215984 | 1  | 203,258,903 | 9.63E-15 | 0.267 | 0.240 |  |  |  |                 |         |

|            |    |             |          |       |       |  |  |  |                  |         |
|------------|----|-------------|----------|-------|-------|--|--|--|------------------|---------|
| cg16097357 | 17 | 73,584,360  | 0.003985 | 0.267 | 0.217 |  |  |  | <i>MYO15B</i>    | Body    |
| cg22898783 | 2  | 26,204,699  | 2.27E-10 | 0.267 | 0.211 |  |  |  | <i>KIF3C</i>     | 1stExon |
| cg03800922 | 6  | 74,290,220  | 0.000154 | 0.267 | 0.291 |  |  |  |                  |         |
| cg25219329 | 22 | 42,679,444  | 0.001352 | 0.267 | 0.234 |  |  |  |                  |         |
| cg25305879 | 2  | 106,814,630 | 3.84E-11 | 0.267 | 0.289 |  |  |  |                  |         |
| cg12643732 | 5  | 691,580     | 0.000381 | 0.267 | 0.292 |  |  |  | <i>TPPP</i>      | 5'UTR   |
| cg01760475 | 8  | 145,104,359 | 0.00105  | 0.267 | 0.266 |  |  |  |                  |         |
| cg15168995 | 22 | 37,914,206  | 1.34E-10 | 0.267 | 0.284 |  |  |  | <i>CARD10</i>    | Body    |
| cg03773647 | 11 | 57,417,949  | 9.15E-07 | 0.267 | 0.228 |  |  |  | <i>YPEL4</i>     | TSS1500 |
| cg19228647 | 6  | 6,901,002   | 1.86E-08 | 0.267 | 0.231 |  |  |  |                  |         |
| cg26279336 | 17 | 46,674,438  | 0.007691 | 0.267 | 0.218 |  |  |  | <i>LOC404266</i> | Body    |
| cg15034300 | 2  | 85,134,468  | 1.4E-05  | 0.267 | 0.167 |  |  |  |                  |         |
| cg19126910 | 11 | 111,249,659 | 2.05E-12 | 0.267 | 0.249 |  |  |  | <i>POU2AF1</i>   | Body    |
| cg06061257 | 17 | 71,361,901  | 1.79E-07 | 0.267 | 0.268 |  |  |  | <i>SDK2</i>      | Body    |
| cg18749404 | 17 | 76,975,944  | 0.001065 | 0.267 | 0.213 |  |  |  | <i>LGALS3BP</i>  | 1stExon |
| cg14831380 | 8  | 144,510,421 | 0.000308 | 0.267 | 0.332 |  |  |  |                  |         |
| cg19643252 | 7  | 151,264,653 | 1.81E-05 | 0.267 | 0.242 |  |  |  | <i>PRKAG2</i>    | Body    |
| cg10279204 | 10 | 71,176,853  | 2.39E-16 | 0.267 | 0.252 |  |  |  | <i>TACR2</i>     | TSS200  |
| cg24375938 | 17 | 13,505,799  | 0.007055 | 0.267 | 0.160 |  |  |  | <i>HS3ST3A1</i>  | TSS1500 |
| cg00811132 | 22 | 19,511,707  | 0.0064   | 0.267 | 0.304 |  |  |  | <i>CLDN5</i>     | 1stExon |
| cg12769994 | 1  | 149,784,571 | 2.23E-05 | 0.267 | 0.241 |  |  |  | <i>HIST2H2BF</i> | TSS1500 |
| cg00014830 | 17 | 77,765,733  | 0.001033 | 0.267 | 0.226 |  |  |  |                  |         |
| cg02059867 | 17 | 38,334,623  | 2.36E-13 | 0.267 | 0.249 |  |  |  | <i>RAPGEFL1</i>  | 1stExon |
| cg12440549 | 13 | 28,541,477  | 0.003149 | 0.267 | 0.191 |  |  |  | <i>CDX2</i>      | Body    |
| cg02882448 | 15 | 33,487,058  | 0.019486 | 0.267 | 0.155 |  |  |  |                  |         |
| cg15235999 | 19 | 52,996,352  | 0.001334 | 0.267 | 0.265 |  |  |  | <i>ZNF578</i>    | 5'UTR   |
| cg16379910 | 14 | 78,636,730  | 0.025069 | 0.267 | 0.285 |  |  |  |                  |         |
| cg17977173 | 2  | 129,076,335 | 0.000135 | 0.267 | 0.253 |  |  |  | <i>HS6ST1</i>    | TSS200  |
| cg10395711 | 12 | 6,938,638   | 2.56E-05 | 0.267 | 0.268 |  |  |  | <i>LEPREL2</i>   | Body    |
| cg10983484 | 15 | 52,018,762  | 2.59E-09 | 0.267 | 0.297 |  |  |  | <i>LYSMD2</i>    | Body    |
| cg15032098 | 4  | 41,258,560  | 7.04E-05 | 0.267 | 0.255 |  |  |  | <i>UCHL1</i>     | TSS1500 |
| cg26728517 | 20 | 39,319,540  | 7.84E-08 | 0.267 | 0.269 |  |  |  |                  |         |
| cg21395577 | 1  | 221,060,851 | 9.75E-06 | 0.267 | 0.260 |  |  |  |                  |         |
| cg24473500 | 7  | 871,436     | 0.000138 | 0.267 | 0.355 |  |  |  | <i>UNC84A</i>    | 5'UTR   |

|            |    |             |          |       |       |          |       |  |                 |         |
|------------|----|-------------|----------|-------|-------|----------|-------|--|-----------------|---------|
| cg24395504 | 6  | 154,869,909 | 8.54E-10 | 0.267 | 0.244 |          |       |  |                 |         |
| cg11711057 | 12 | 107,974,444 | 8.04E-13 | 0.267 | 0.261 |          |       |  | <i>BTBD11</i>   | TSS200  |
| cg13066043 | 14 | 24,808,987  | 5.22E-08 | 0.267 | 0.273 |          |       |  | <i>RIPK3</i>    | Body    |
| cg22213386 | 5  | 156,887,005 | 0.009896 | 0.267 | 0.194 |          |       |  | <i>NIPAL4</i>   | TSS200  |
| cg24074448 | 19 | 18,768,688  | 1.95E-33 | 0.267 | 0.258 |          |       |  | <i>KLHL26</i>   | Body    |
| cg26651950 | 22 | 37,976,179  | 5.71E-13 | 0.267 | 0.259 |          |       |  | <i>LGALS2</i>   | TSS200  |
| cg14557288 | 10 | 72,454,026  | 0.006459 | 0.267 | 0.175 |          |       |  | <i>ADAMTS14</i> | Body    |
| cg04337944 | 22 | 45,899,303  | 1.76E-13 | 0.267 | 0.245 | 4.08E-37 | 0.222 |  | <i>FBLN1</i>    | Body    |
| cg13019491 | 14 | 60,977,856  | 1.03E-05 | 0.267 | 0.263 |          |       |  | <i>SIX6</i>     | Body    |
| cg20956738 | 18 | 55,108,537  | 0.008333 | 0.267 | 0.301 |          |       |  | <i>ONECUT2</i>  | Body    |
| cg12628061 | 1  | 56,453,730  | 1.01E-12 | 0.267 | 0.214 |          |       |  |                 |         |
| cg13457165 | 1  | 40,105,079  | 1.34E-05 | 0.267 | 0.282 |          |       |  | <i>HEYL</i>     | Body    |
| cg14286456 | 1  | 8,570,225   | 2.32E-15 | 0.267 | 0.253 |          |       |  | <i>RERE</i>     | Body    |
| cg19170015 | 4  | 74,734,714  | 0.00037  | 0.267 | 0.183 |          |       |  | <i>CXCL1</i>    | TSS1500 |
| cg02022808 | 5  | 140,744,914 | 0.002455 | 0.267 | 0.312 |          |       |  | <i>PCDHGA4</i>  | Body    |
| cg12606409 | 2  | 27,958,270  | 0.000119 | 0.267 | 0.176 |          |       |  |                 |         |
| cg27406975 | 2  | 172,955,512 | 0.048453 | 0.267 | 0.333 |          |       |  |                 |         |
| cg17860198 | 3  | 5,138,170   | 9.02E-05 | 0.267 | 0.262 |          |       |  |                 |         |
| cg18815343 | 6  | 28,367,644  | 0.000516 | 0.267 | 0.216 |          |       |  | <i>ZSCAN12</i>  | TSS200  |
| cg21853707 | 1  | 164,676,874 | 8.29E-16 | 0.267 | 0.258 |          |       |  | <i>PBX1</i>     | Body    |
| cg24813736 | 5  | 63,255,045  | 1.78E-05 | 0.267 | 0.234 |          |       |  |                 |         |
| cg09371112 | 11 | 12,222,570  | 2.31E-16 | 0.267 | 0.258 |          |       |  | <i>MICAL2</i>   | Body    |
| cg16237891 | 1  | 146,544,645 | 8.76E-07 | 0.267 | 0.299 |          |       |  |                 |         |
| cg26570165 | 1  | 119,541,833 | 6.56E-09 | 0.267 | 0.260 |          |       |  |                 |         |
| cg23999695 | 15 | 89,943,625  | 0.041427 | 0.267 | 0.239 |          |       |  |                 |         |
| cg24021956 | 7  | 79,083,509  | 0.006223 | 0.267 | 0.227 |          |       |  | <i>MAGI2</i>    | TSS1500 |
| cg24877675 | 10 | 133,995,387 | 4.42E-11 | 0.267 | 0.257 |          |       |  | <i>JAKMIP3</i>  | 3'UTR   |
| cg15820574 | 1  | 156,406,711 | 0.001854 | 0.267 | 0.319 |          |       |  |                 |         |
| cg00990385 | 12 | 113,587,690 | 5.11E-06 | 0.267 | 0.273 |          |       |  | <i>CCDC42B</i>  | 1stExon |
| cg13809441 | 6  | 6,737,631   | 5.37E-09 | 0.267 | 0.216 |          |       |  |                 |         |
| cg19246977 | 17 | 17,280,399  | 0.010413 | 0.267 | 0.156 |          |       |  |                 |         |
| cg13300273 | 1  | 200,842,890 | 7.38E-08 | 0.267 | 0.237 |          |       |  | <i>GPR25</i>    | 1stExon |
| cg03512076 | 8  | 103,907,077 | 4.02E-17 | 0.267 | 0.260 |          |       |  |                 |         |
| cg12438430 | 10 | 1,507,896   | 1.63E-07 | 0.267 | 0.183 |          |       |  | <i>ADARB2</i>   | Body    |

|            |    |             |          |       |       |          |       |     |                 |         |
|------------|----|-------------|----------|-------|-------|----------|-------|-----|-----------------|---------|
| cg13501279 | 1  | 167,523,555 | 0.002713 | 0.267 | 0.198 |          |       |     | <i>CREG1</i>    | TSS1500 |
| cg14689479 | 8  | 53,326,618  | 0.000146 | 0.267 | 0.314 |          |       |     |                 |         |
| cg13655250 | 9  | 134,544,528 | 1.44E-10 | 0.267 | 0.249 |          |       |     | <i>RAPGEF1</i>  | Body    |
| cg07621749 | 15 | 41,806,141  | 1.27E-05 | 0.267 | 0.262 |          |       |     | <i>LTK</i>      | TSS200  |
| cg00720047 | 16 | 1,186,227   | 5.82E-05 | 0.267 | 0.288 |          |       |     |                 |         |
| cg02309273 | 1  | 38,412,744  | 1.89E-05 | 0.267 | 0.280 | 2.72E-27 | 0.182 |     | <i>INPP5B</i>   | TSS200  |
| cg07881210 | 17 | 398,090     | 3.95E-12 | 0.267 | 0.248 |          |       |     |                 |         |
| cg19776793 | 17 | 79,225,974  | 2.78E-15 | 0.267 | 0.246 |          |       |     | <i>SLC38A10</i> | Body    |
| cg04674508 | 6  | 29,975,239  | 2.85E-09 | 0.267 | 0.239 |          |       |     | <i>HLA-J</i>    | Body    |
| cg05940984 | 11 | 32,448,678  | 0.020066 | 0.267 | 0.268 |          |       |     | <i>WT1</i>      | Body    |
| cg03803086 | 21 | 34,185,960  | 2.47E-09 | 0.266 | 0.248 |          |       |     | <i>C21orf62</i> | 5'UTR   |
| cg20322093 | 17 | 72,931,788  | 3.66E-12 | 0.266 | 0.224 |          |       |     | <i>OTOP3</i>    | TSS200  |
| cg27391934 | 1  | 1,369,948   | 0.035266 | 0.266 | 0.152 |          |       |     | <i>VWA1</i>     | TSS1500 |
| cg06677890 | 5  | 149,887,486 | 1.67E-13 | 0.266 | 0.249 |          |       |     | <i>NDST1</i>    | TSS200  |
| cg08394412 | 16 | 50,875,140  | 0.008672 | 0.266 | 0.308 |          |       |     |                 |         |
| cg04927502 | 1  | 149,889,361 | 0.008175 | 0.266 | 0.308 |          |       |     | <i>SV2A</i>     | 5'UTR   |
| cg04615865 | 12 | 121,678,720 | 0.005436 | 0.266 | 0.364 |          |       |     | <i>CAMKK2</i>   | Body    |
| cg27315333 | 2  | 63,285,950  | 3.51E-05 | 0.266 | 0.247 |          |       |     |                 |         |
| cg13668314 | 9  | 130,692,638 | 0.000911 | 0.266 | 0.130 |          |       |     | <i>PIP5KL1</i>  | Body    |
| cg19479609 | 2  | 208,390,216 | 3.05E-06 | 0.266 | 0.250 |          |       |     |                 |         |
| cg20635389 | 2  | 207,859,049 | 2.74E-05 | 0.266 | 0.234 |          |       | Yes |                 |         |
| cg11628739 | 17 | 60,731,254  | 3.01E-18 | 0.266 | 0.249 |          |       |     | <i>MRC2</i>     | Body    |
| cg14354895 | 22 | 50,607,824  | 3.5E-05  | 0.266 | 0.267 |          |       |     | <i>PANX2</i>    | TSS1500 |
| cg04360793 | 1  | 79,472,361  | 5.94E-07 | 0.266 | 0.266 |          |       |     | <i>ELTD1</i>    | 5'UTR   |
| cg08814105 | 5  | 172,662,130 | 0.04056  | 0.266 | 0.174 |          |       |     | <i>NKX2-5</i>   | 5'UTR   |
| cg00647859 | 1  | 185,534,625 | 3.9E-12  | 0.266 | 0.263 |          |       |     |                 |         |
| cg18373855 | 6  | 159,360,209 | 1.01E-11 | 0.266 | 0.266 |          |       |     |                 |         |
| cg05357152 | 20 | 61,049,813  | 7.31E-07 | 0.266 | 0.247 |          |       |     | <i>GATA5</i>    | Body    |
| cg21568661 | 15 | 62,411,575  | 0.000338 | 0.266 | 0.276 |          |       |     |                 |         |
| cg09519327 | 7  | 150,710,730 | 0.025722 | 0.266 | 0.323 |          |       |     | <i>ATG9B</i>    | 3'UTR   |
| cg00290974 | 11 | 10,316,461  | 0.007575 | 0.266 | 0.136 |          |       |     | <i>SBF2</i>     | TSS1500 |
| cg09281101 | 1  | 236,227,410 | 0.001722 | 0.266 | 0.203 |          |       |     | <i>NID1</i>     | Body    |
| cg18676237 | 6  | 2,903,258   | 0.005683 | 0.266 | 0.291 | 2.53E-13 | 0.187 |     | <i>SERPINB9</i> | 5'UTR   |
| cg14546076 | 6  | 29,796,420  | 8.33E-07 | 0.266 | 0.241 |          |       |     | <i>HLA-G</i>    | Body    |

|            |    |             |          |       |       |            |       |     |                  |         |
|------------|----|-------------|----------|-------|-------|------------|-------|-----|------------------|---------|
| cg00282510 | 9  | 100,611,516 | 0.001223 | 0.266 | 0.271 |            |       |     |                  |         |
| cg24628744 | 5  | 134,735,654 | 3.48E-05 | 0.266 | 0.216 | 1.04E-13   | 0.238 |     | <i>H2AFY</i>     | TSS1500 |
| cg01275133 | 16 | 85,229,580  | 4.21E-14 | 0.266 | 0.249 |            |       |     |                  |         |
| cg16922279 | 11 | 71,955,439  | 7.66E-07 | 0.266 | 0.299 |            |       |     | <i>PHOX2A</i>    | TSS1500 |
| cg18968196 | 2  | 39,892,502  | 0.000155 | 0.266 | 0.241 |            |       |     | <i>TMEM178</i>   | TSS1500 |
| cg02953912 | 11 | 2,904,591   | 3.96E-27 | 0.266 | 0.257 |            |       |     | <i>CDKN1C</i>    | 3'UTR   |
| cg04826040 | 12 | 132,933,643 | 1.62E-05 | 0.266 | 0.256 |            |       |     |                  |         |
| cg20176388 | 2  | 17,724,532  | 1.49E-08 | 0.266 | 0.245 |            |       |     | <i>VSNL1</i>     | 5'UTR   |
| cg13187827 | 6  | 31,734,192  | 6.9E-13  | 0.266 | 0.256 |            |       |     | <i>C6orf27</i>   | Body    |
| cg23615741 | 10 | 101,297,642 | 1.24E-05 | 0.266 | 0.245 |            |       |     |                  |         |
| cg15464821 | 1  | 167,682,648 | 2.69E-09 | 0.266 | 0.247 |            |       |     |                  |         |
| cg02325832 | 4  | 13,542,883  | 7.64E-09 | 0.266 | 0.246 |            |       |     | <i>NKX3-2</i>    | 3'UTR   |
| cg00321234 | 4  | 141,217,605 | 4.63E-10 | 0.266 | 0.217 |            |       |     | <i>SCOC</i>      | 5'UTR   |
| cg03052099 | 16 | 67,951,373  | 5.37E-10 | 0.266 | 0.280 |            |       |     | <i>PSKH1</i>     | Body    |
| cg12148515 | 8  | 41,517,301  | 3.76E-14 | 0.266 | 0.269 |            |       |     | <i>ANK1</i>      | 3'UTR   |
| cg22465479 | 19 | 50,306,072  | 0.000286 | 0.266 | 0.272 |            |       |     | <i>AP2A1</i>     | Body    |
| cg12133048 | 5  | 141,293,785 | 0.017283 | 0.266 | 0.206 |            |       |     |                  |         |
| cg13889415 | 9  | 116,943,379 | 0.000309 | 0.266 | 0.244 |            |       |     | <i>COL27A1</i>   | Body    |
| cg26822986 | 18 | 21,199,691  | 6.15E-05 | 0.266 | 0.247 |            |       |     | <i>ANKRD29</i>   | Body    |
| cg13302869 | 2  | 131,010,522 | 0.00013  | 0.266 | 0.224 |            |       |     |                  |         |
| cg12020396 | 19 | 55,593,580  | 1.2E-05  | 0.266 | 0.271 |            |       |     | <i>EPS8L1</i>    | Body    |
| cg24381412 | 15 | 45,996,787  | 0.021777 | 0.266 | 0.230 |            |       |     |                  |         |
| cg18050804 | 13 | 113,677,188 | 9.18E-09 | 0.266 | 0.279 |            |       |     | <i>MCF2L</i>     | Body    |
| cg04394967 | 14 | 68,189,457  | 0.005206 | 0.266 | 0.263 | 0.00000097 | 0.088 |     | <i>RDH12</i>     | Body    |
| cg17202313 | 3  | 181,444,989 | 0.036125 | 0.266 | 0.324 |            |       |     | <i>SOX2OT</i>    | Body    |
| cg19841369 | 14 | 64,663,928  | 3.28E-06 | 0.266 | 0.253 |            |       |     | <i>SYNE2</i>     | Body    |
| cg03933572 | 2  | 150,187,926 | 6.87E-06 | 0.266 | 0.199 |            |       |     | <i>LYPD6</i>     | 5'UTR   |
| cg08833577 | 10 | 118,899,288 | 6.46E-06 | 0.266 | 0.255 |            |       |     | <i>VAX1</i>      | TSS1500 |
| cg09699056 | 17 | 79,503,642  | 9.44E-09 | 0.266 | 0.254 |            |       | Yes | <i>FSCN2</i>     | Body    |
| cg09984479 | 22 | 38,635,620  | 1.69E-05 | 0.266 | 0.314 |            |       |     | <i>TMEM184B</i>  | Body    |
| cg22272282 | 6  | 27,107,670  | 2.99E-07 | 0.266 | 0.260 |            |       |     | <i>HIST1H2BK</i> | 3'UTR   |
| cg23383189 | 5  | 176,560,116 | 1.14E-06 | 0.266 | 0.237 |            |       |     | <i>NSD1</i>      | 1stExon |
| cg16120833 | 17 | 72,443,085  | 8.14E-11 | 0.266 | 0.273 |            |       |     | <i>GPRC5C</i>    | Body    |
| cg21163444 | 12 | 54,765,670  | 2.36E-16 | 0.266 | 0.247 |            |       |     | <i>ZNF385A</i>   | Body    |

|            |    |             |          |       |       |  |  |  |                 |         |
|------------|----|-------------|----------|-------|-------|--|--|--|-----------------|---------|
| cg19695041 | 8  | 38,615,330  | 8.96E-08 | 0.266 | 0.208 |  |  |  | <i>TACC1</i>    | 5'UTR   |
| cg21560142 | 19 | 47,730,821  | 0.006553 | 0.266 | 0.334 |  |  |  | <i>BBC3</i>     | Body    |
| cg14094646 | 9  | 37,030,262  | 1.91E-10 | 0.266 | 0.267 |  |  |  | <i>PAX5</i>     | Body    |
| cg22122321 | 4  | 85,407,081  | 9.53E-12 | 0.266 | 0.256 |  |  |  |                 |         |
| cg04093349 | 15 | 66,998,947  | 1.57E-55 | 0.266 | 0.259 |  |  |  | <i>SMAD6</i>    | Body    |
| cg03562414 | 19 | 52,391,078  | 0.011008 | 0.266 | 0.255 |  |  |  | <i>ZNF577</i>   | Body    |
| cg23647037 | X  | 119,150,375 | 0.022605 | 0.266 | 0.228 |  |  |  |                 |         |
| cg21139587 | 1  | 201,455,370 | 1.43E-05 | 0.266 | 0.295 |  |  |  | <i>CSRP1</i>    | Body    |
| cg18948199 | 12 | 118,313,708 | 7.84E-08 | 0.266 | 0.265 |  |  |  | <i>KSR2</i>     | Body    |
| cg00299972 | 10 | 102,892,528 | 7.31E-07 | 0.266 | 0.255 |  |  |  | <i>TLX1</i>     | Body    |
| cg03969996 | 19 | 46,999,055  | 1.18E-06 | 0.266 | 0.277 |  |  |  | <i>PNMAL2</i>   | 1stExon |
| cg10124710 | 1  | 146,544,267 | 2.68E-09 | 0.266 | 0.267 |  |  |  |                 |         |
| cg12173409 | 3  | 54,154,746  | 0.00551  | 0.266 | 0.230 |  |  |  |                 |         |
| cg13700552 | X  | 101,968,505 | 1.39E-08 | 0.266 | 0.260 |  |  |  | <i>GPRASP2</i>  | 5'UTR   |
| cg20346189 | X  | 71,524,766  | 1.7E-06  | 0.266 | 0.246 |  |  |  | <i>CITED1</i>   | 5'UTR   |
| cg20514322 | 2  | 134,023,662 | 5.98E-08 | 0.266 | 0.246 |  |  |  | <i>NCKAP5</i>   | Body    |
| cg10421979 | 17 | 48,546,321  | 0.024451 | 0.266 | 0.239 |  |  |  | <i>CHAD</i>     | TSS200  |
| cg27274135 | X  | 129,093,798 | 0.023707 | 0.266 | 0.260 |  |  |  |                 |         |
| cg14845020 | 20 | 55,833,416  | 1.18E-11 | 0.266 | 0.285 |  |  |  | <i>BMP7</i>     | Body    |
| cg06201861 | 16 | 84,877,964  | 2.64E-14 | 0.266 | 0.256 |  |  |  | <i>CRISPLD2</i> | Body    |
| cg04904099 | 16 | 68,678,010  | 4.73E-08 | 0.266 | 0.235 |  |  |  | <i>CDH3</i>     | TSS200  |
| cg07448060 | 7  | 79,083,753  | 0.004249 | 0.266 | 0.303 |  |  |  | <i>MAGI2</i>    | TSS1500 |
| cg14482313 | 12 | 52,626,889  | 3.96E-05 | 0.266 | 0.291 |  |  |  | <i>KRT7</i>     | TSS200  |
| cg25623768 | 2  | 45,241,008  | 0.025314 | 0.266 | 0.302 |  |  |  |                 |         |
| cg14420245 | 2  | 148,601,095 | 1.78E-08 | 0.266 | 0.225 |  |  |  | <i>ACVR2A</i>   | TSS1500 |
| cg22920700 | 8  | 99,955,610  | 6.49E-10 | 0.266 | 0.269 |  |  |  | <i>OSR2</i>     | TSS1500 |
| cg24643417 | 9  | 503,937     | 0.001352 | 0.266 | 0.174 |  |  |  | <i>KANK1</i>    | TSS1500 |
| cg00188055 | 6  | 32,076,079  | 1.75E-08 | 0.266 | 0.260 |  |  |  | <i>TNXB</i>     | 5'UTR   |
| cg12177220 | 3  | 38,080,925  | 0.020804 | 0.266 | 0.180 |  |  |  | <i>DLEC1</i>    | 1stExon |
| cg10322124 | 8  | 74,331,865  | 2.95E-18 | 0.266 | 0.268 |  |  |  |                 |         |
| cg17099016 | 11 | 17,568,889  | 1.8E-18  | 0.266 | 0.273 |  |  |  |                 |         |
| cg20253855 | 7  | 101,762,511 | 2.56E-19 | 0.266 | 0.257 |  |  |  | <i>CUX1</i>     | Body    |
| cg01859228 | 15 | 64,208,452  | 1.86E-13 | 0.266 | 0.284 |  |  |  | <i>DAPK2</i>    | Body    |
| cg27520776 | 1  | 217,311,982 | 8.78E-08 | 0.266 | 0.270 |  |  |  | <i>ESRRG</i>    | TSS1500 |



|            |    |             |          |       |       |          |       |     |                 |         |
|------------|----|-------------|----------|-------|-------|----------|-------|-----|-----------------|---------|
| cg00112465 | 3  | 128,719,999 | 0.006941 | 0.266 | 0.229 |          |       |     | <i>CCDC48</i>   | TSS1500 |
| cg12439439 | 11 | 129,243,219 | 0.000134 | 0.266 | 0.286 |          |       |     |                 |         |
| cg05282518 | 14 | 20,344,920  | 4.36E-18 | 0.266 | 0.234 |          |       |     | <i>OR4K2</i>    | 1stExon |
| cg12604950 | 1  | 180,882,287 | 0.001558 | 0.266 | 0.236 |          |       |     | <i>KIAA1614</i> | TSS200  |
| cg19370054 | 2  | 98,964,186  | 0.002096 | 0.266 | 0.231 |          |       |     | <i>CNGA3</i>    | 5'UTR   |
| cg13490403 | 9  | 124,982,413 | 3.91E-05 | 0.266 | 0.283 |          |       |     | <i>LHX6</i>     | Body    |
| cg01763575 | 20 | 44,875,431  | 0.004132 | 0.266 | 0.191 |          |       |     | <i>CDH22</i>    | Body    |
| cg04083712 | 7  | 99,156,968  | 0.004012 | 0.266 | 0.208 |          |       |     | <i>ZNF655</i>   | 5'UTR   |
| cg09628195 | 1  | 119,551,303 | 0.008733 | 0.266 | 0.286 |          |       |     |                 |         |
| cg22870092 | 4  | 7,918,691   | 3.94E-23 | 0.266 | 0.253 |          |       |     | <i>AFAP1</i>    | 5'UTR   |
| cg13699414 | 5  | 178,957,880 | 6.33E-10 | 0.266 | 0.236 |          |       |     |                 |         |
| cg19756821 | 1  | 54,940,702  | 0.005821 | 0.266 | 0.116 |          |       |     |                 |         |
| cg26472133 | 7  | 156,797,104 | 1.82E-08 | 0.266 | 0.228 |          |       |     |                 |         |
| cg19023847 | 10 | 99,344,164  | 4.35E-07 | 0.266 | 0.285 |          |       |     | <i>DHDPSL</i>   | 1stExon |
| cg25044651 | 5  | 115,298,720 | 4.41E-06 | 0.266 | 0.243 | 9.26E-24 | 0.242 |     | <i>LVRN</i>     | 1stExon |
| cg02649597 | 2  | 45,171,621  | 1.99E-08 | 0.266 | 0.258 |          |       |     | <i>SIX3</i>     | Body    |
| cg04706201 | 5  | 131,773,770 | 1.6E-09  | 0.266 | 0.260 |          |       |     | <i>C5orf56</i>  | Body    |
| cg26575622 | 10 | 77,872,458  | 0.000666 | 0.266 | 0.154 |          |       | Yes | <i>C10orf11</i> | Body    |
| cg11743000 | 1  | 65,355,578  | 8.61E-10 | 0.265 | 0.271 |          |       |     | <i>JAK1</i>     | 5'UTR   |
| cg23239574 | 1  | 228,653,136 | 0.00335  | 0.265 | 0.353 |          |       |     |                 |         |
| cg06571407 | 20 | 44,746,823  | 6.63E-05 | 0.265 | 0.320 |          |       |     | <i>CD40</i>     | TSS200  |
| cg17459443 | 17 | 6,559,109   | 0.006267 | 0.265 | 0.332 |          |       |     |                 |         |
| cg27563985 | 20 | 54,580,677  | 8.28E-07 | 0.265 | 0.287 |          |       |     | <i>CBLN4</i>    | TSS1500 |
| cg25763036 | 4  | 13,540,946  | 0.027413 | 0.265 | 0.354 |          |       |     |                 |         |
| cg05253110 | 7  | 141,130,687 | 2.21E-05 | 0.265 | 0.234 |          |       |     |                 |         |
| cg09976984 | 6  | 27,182,943  | 0.00142  | 0.265 | 0.320 |          |       |     |                 |         |
| cg25120290 | 14 | 85,996,873  | 0.009368 | 0.265 | 0.282 |          |       |     | <i>FLRT2</i>    | 1stExon |
| cg15027426 | Y  | 21,664,604  | 0.00034  | 0.265 | 0.269 |          |       |     | <i>BCORL2</i>   | Body    |
| cg08376310 | 11 | 2,858,621   | 1.59E-13 | 0.265 | 0.250 |          |       |     | <i>KCNQ1</i>    | Body    |
| cg13366537 | 7  | 30,029,754  | 0.003406 | 0.265 | 0.133 |          |       |     | <i>SCRN1</i>    | TSS1500 |
| cg14338526 | 3  | 172,394,394 | 9.59E-18 | 0.265 | 0.241 |          |       |     | <i>NCEH1</i>    | 5'UTR   |
| cg18119977 | 8  | 96,226,844  | 0.00017  | 0.265 | 0.316 |          |       |     |                 |         |
| cg03396151 | 15 | 37,387,304  | 0.00884  | 0.265 | 0.322 |          |       |     | <i>MEIS2</i>    | Body    |
| cg03465499 | 11 | 68,781,279  | 0.000843 | 0.265 | 0.201 |          |       |     | <i>MRGPRF</i>   | TSS1500 |

|            |    |             |          |       |       |            |       |  |                 |         |
|------------|----|-------------|----------|-------|-------|------------|-------|--|-----------------|---------|
| cg07382998 | 17 | 76,880,071  | 3.29E-08 | 0.265 | 0.243 |            |       |  | <i>TIMP2</i>    | Body    |
| cg13720108 | 3  | 62,364,032  | 0.007297 | 0.265 | 0.331 |            |       |  |                 |         |
| cg22481263 | 1  | 906,493     | 1.77E-35 | 0.265 | 0.255 |            |       |  | <i>PLEKHN1</i>  | Body    |
| cg07391141 | 21 | 44,035,034  | 1.15E-14 | 0.265 | 0.233 |            |       |  |                 |         |
| cg12103951 | 10 | 88,162,314  | 4.6E-05  | 0.265 | 0.252 |            |       |  |                 |         |
| cg22861587 | 7  | 91,196,675  | 3.34E-09 | 0.265 | 0.288 |            |       |  |                 |         |
| cg03297163 | 7  | 2,548,137   | 0.001336 | 0.265 | 0.303 |            |       |  |                 |         |
| cg26063904 | 1  | 101,313,199 | 3.81E-06 | 0.265 | 0.265 |            |       |  |                 |         |
| cg07063583 | X  | 8,698,228   | 1.16E-07 | 0.265 | 0.242 |            |       |  | <i>KAL1</i>     | Body    |
| cg22304399 | 19 | 13,319,324  | 0.002073 | 0.265 | 0.321 |            |       |  | <i>CACNA1A</i>  | Body    |
| cg12127282 | 2  | 177,014,685 | 1.08E-08 | 0.265 | 0.250 | 0.02732237 | 0.037 |  | <i>HOXD4</i>    | TSS1500 |
| cg21800258 | 6  | 28,557,080  | 0.000882 | 0.265 | 0.219 |            |       |  |                 |         |
| cg25428494 | 4  | 84,255,411  | 1.59E-13 | 0.265 | 0.267 |            |       |  | <i>HPSE</i>     | Body    |
| cg27392904 | 19 | 50,400,714  | 0.001479 | 0.265 | 0.325 |            |       |  | <i>IL411</i>    | TSS1500 |
| cg18551877 | 11 | 58,612,087  | 7.35E-06 | 0.265 | 0.271 |            |       |  | <i>GLYATL2</i>  | TSS200  |
| cg07753510 | 3  | 171,111,243 | 2.14E-06 | 0.265 | 0.180 |            |       |  | <i>TNIK</i>     | Body    |
| cg07721569 | 6  | 10,420,287  | 0.006347 | 0.265 | 0.292 |            |       |  | <i>TFAP2A</i>   | TSS1500 |
| cg00544436 | 6  | 34,203,564  | 3.59E-06 | 0.265 | 0.252 |            |       |  | <i>HMGA1</i>    | TSS1500 |
| cg12671030 | 2  | 109,647,956 | 2.6E-06  | 0.265 | 0.243 |            |       |  |                 |         |
| cg14611399 | 3  | 87,138,203  | 8.64E-07 | 0.265 | 0.256 |            |       |  |                 |         |
| cg07222863 | 8  | 104,153,592 | 1.95E-08 | 0.265 | 0.284 |            |       |  | <i>C8orf56</i>  | TSS200  |
| cg16184495 | 19 | 15,343,350  | 0.003588 | 0.265 | 0.269 |            |       |  | <i>EPHX3</i>    | 5'UTR   |
| cg24527881 | 1  | 45,187,630  | 2.72E-14 | 0.265 | 0.251 |            |       |  | <i>C1orf228</i> | Body    |
| cg07540103 | 17 | 6,679,499   | 0.005691 | 0.265 | 0.247 |            |       |  | <i>FBXO39</i>   | TSS200  |
| cg12869615 | X  | 101,906,288 | 0.043889 | 0.265 | 0.321 |            |       |  | <i>GPRASP1</i>  | TSS200  |
| cg08302480 | 19 | 54,369,133  | 9.26E-19 | 0.265 | 0.253 |            |       |  | <i>MYADM</i>    | TSS1500 |
| cg09474229 | 19 | 39,360,330  | 0.010964 | 0.265 | 0.311 |            |       |  | <i>RINL</i>     | Body    |
| cg14996220 | 12 | 85,673,270  | 0.015854 | 0.265 | 0.295 |            |       |  | <i>ALX1</i>     | TSS1500 |
| cg04610224 | 11 | 111,411,756 | 0.007767 | 0.265 | 0.297 |            |       |  | <i>LAYN</i>     | Body    |
| cg10694152 | 13 | 99,404,506  | 0.004428 | 0.265 | 0.235 | 2.44E-16   | 0.206 |  | <i>SLC15A1</i>  | Body    |
| cg00877887 | 15 | 45,406,654  | 0.000474 | 0.265 | 0.233 | 8.26E-11   | 0.111 |  | <i>DUOXA2</i>   | 1stExon |
| cg21056992 | 19 | 17,392,414  | 0.015906 | 0.265 | 0.243 |            |       |  | <i>ANKLE1</i>   | TSS200  |
| cg13980799 | 10 | 119,000,215 | 2.59E-07 | 0.265 | 0.251 |            |       |  | <i>SLC18A2</i>  | TSS1500 |
| cg15854847 | 8  | 23,563,970  | 0.001972 | 0.265 | 0.220 |            |       |  | <i>NKX2-6</i>   | TSS200  |

|            |    |             |          |       |       |  |  |  |                  |         |
|------------|----|-------------|----------|-------|-------|--|--|--|------------------|---------|
| cg17265380 | 21 | 26,934,383  | 0.02291  | 0.265 | 0.238 |  |  |  | <i>MIR155HG</i>  | TSS200  |
| cg04303382 | 17 | 77,766,421  | 1.44E-06 | 0.265 | 0.264 |  |  |  |                  |         |
| cg00919971 | 7  | 1,286,149   | 0.000304 | 0.265 | 0.235 |  |  |  |                  |         |
| cg09578794 | 14 | 104,690,040 | 1.09E-13 | 0.265 | 0.238 |  |  |  |                  |         |
| cg26305817 | 5  | 172,656,055 | 0.000446 | 0.265 | 0.227 |  |  |  |                  |         |
| cg01476568 | 10 | 5,734,716   | 4.01E-11 | 0.265 | 0.229 |  |  |  | <i>C10orf18</i>  | 5'UTR   |
| cg00173659 | 7  | 156,871,088 | 9.41E-09 | 0.265 | 0.273 |  |  |  |                  |         |
| cg12523526 | 5  | 2,756,005   | 0.020471 | 0.265 | 0.246 |  |  |  |                  |         |
| cg01539133 | 19 | 4,607,324   | 0.005276 | 0.265 | 0.165 |  |  |  |                  |         |
| cg11764900 | 6  | 38,683,035  | 1.81E-12 | 0.265 | 0.249 |  |  |  |                  |         |
| cg04934382 | 17 | 77,766,335  | 4.92E-07 | 0.265 | 0.266 |  |  |  |                  |         |
| cg14121142 | 12 | 49,391,363  | 0.000347 | 0.265 | 0.337 |  |  |  | <i>DDN</i>       | Body    |
| cg21091547 | 6  | 36,645,500  | 2.51E-05 | 0.265 | 0.277 |  |  |  | <i>CDKN1A</i>    | TSS1500 |
| cg24828151 | 5  | 54,516,779  | 0.001679 | 0.265 | 0.264 |  |  |  |                  |         |
| cg00918944 | 9  | 35,908,117  | 1.22E-11 | 0.265 | 0.272 |  |  |  | <i>LOC158376</i> | TSS1500 |
| cg01383997 | 3  | 126,423,799 | 7.14E-06 | 0.265 | 0.188 |  |  |  | <i>CHCHD6</i>    | Body    |
| cg04666027 | 15 | 74,583,589  | 0.000498 | 0.265 | 0.204 |  |  |  | <i>CCDC33</i>    | Body    |
| cg07265743 | 17 | 59,535,253  | 1.92E-06 | 0.265 | 0.274 |  |  |  | <i>TBX4</i>      | Body    |
| cg25959149 | 20 | 17,674,250  | 5.26E-05 | 0.265 | 0.259 |  |  |  | <i>BANF2</i>     | TSS200  |
| cg01899130 | 14 | 55,348,681  | 0.010693 | 0.265 | 0.250 |  |  |  | <i>GCH1</i>      | Body    |
| cg00347677 | 1  | 63,795,636  | 5.24E-07 | 0.265 | 0.278 |  |  |  |                  |         |
| cg26430059 | 14 | 89,770,384  | 0.023871 | 0.265 | 0.240 |  |  |  | <i>FOXN3</i>     | Body    |
| cg03743720 | 2  | 241,460,002 | 1.22E-35 | 0.265 | 0.256 |  |  |  | <i>ANKMY1</i>    | Body    |
| cg18031850 | 19 | 33,716,452  | 3.47E-06 | 0.265 | 0.257 |  |  |  | <i>SLC7A10</i>   | Body    |
| cg18062140 | 20 | 55,967,678  | 7.68E-14 | 0.265 | 0.248 |  |  |  | <i>RBM38</i>     | Body    |
| cg15792487 | 17 | 7,348,316   | 7.04E-13 | 0.265 | 0.223 |  |  |  | <i>CHRNA1</i>    | TSS200  |
| cg26644853 | 16 | 57,406,257  | 5.22E-09 | 0.265 | 0.248 |  |  |  | <i>CX3CL1</i>    | TSS200  |
| cg16144883 | 17 | 398,066     | 3.87E-41 | 0.265 | 0.263 |  |  |  |                  |         |
| cg00490075 | 13 | 27,359,547  | 7.22E-05 | 0.265 | 0.274 |  |  |  |                  |         |
| cg08282145 | 14 | 24,868,755  | 1.65E-09 | 0.265 | 0.278 |  |  |  | <i>NYNRIN</i>    | Body    |
| cg23003500 | 3  | 42,543,530  | 0.024191 | 0.265 | 0.277 |  |  |  | <i>VIPR1</i>     | TSS1500 |
| cg03804400 | 3  | 143,505,340 | 5.09E-27 | 0.265 | 0.264 |  |  |  | <i>SLC9A9</i>    | Body    |
| cg05668342 | 16 | 1,340,422   | 4.26E-09 | 0.265 | 0.270 |  |  |  |                  |         |
| cg16805068 | 20 | 31,410,931  | 3.45E-22 | 0.265 | 0.239 |  |  |  | <i>MAPRE1</i>    | 5'UTR   |

|            |    |             |          |       |       |          |       |     |                 |         |
|------------|----|-------------|----------|-------|-------|----------|-------|-----|-----------------|---------|
| cg00884221 | 4  | 57,976,915  | 0.01535  | 0.265 | 0.299 | 2.53E-07 | 0.135 |     | <i>IGFBP7</i>   | TSS1500 |
| cg12951849 | 18 | 11,148,932  | 0.001038 | 0.265 | 0.231 |          |       |     | <i>FAM38B</i>   | TSS200  |
| cg02511809 | 5  | 112,073,544 | 0.000346 | 0.265 | 0.148 |          |       |     | <i>APC</i>      | TSS200  |
| cg11931727 | 2  | 58,655,790  | 0.010881 | 0.265 | 0.093 |          |       |     |                 |         |
| cg19355079 | 19 | 23,253,218  | 0.001024 | 0.265 | 0.296 |          |       |     |                 |         |
| cg21633059 | 5  | 146,863,675 | 1.43E-07 | 0.265 | 0.270 |          |       |     |                 |         |
| cg05493001 | 19 | 52,195,559  | 4.24E-12 | 0.265 | 0.243 |          |       |     | <i>MIR125A</i>  | TSS1500 |
| cg08750439 | 11 | 128,321,880 | 1.81E-19 | 0.265 | 0.261 |          |       | Yes |                 |         |
| cg20587808 | 3  | 184,320,123 | 2.53E-11 | 0.265 | 0.249 |          |       |     |                 |         |
| cg07714420 | 16 | 85,123,342  | 2.62E-14 | 0.265 | 0.262 |          |       |     | <i>KIAA0513</i> | 3'UTR   |
| cg19764143 | 14 | 60,974,499  | 0.016343 | 0.265 | 0.216 |          |       |     | <i>SIX6</i>     | TSS1500 |
| cg00177388 | 5  | 72,677,886  | 0.00014  | 0.265 | 0.246 |          |       |     |                 |         |
| cg25298161 | 15 | 41,806,135  | 7.94E-07 | 0.265 | 0.254 |          |       |     | <i>LTK</i>      | TSS200  |
| cg14659662 | 1  | 54,151,053  | 6.68E-14 | 0.265 | 0.268 |          |       |     | <i>GLIS1</i>    | 5'UTR   |
| cg23164183 | 5  | 2,754,894   | 0.000177 | 0.265 | 0.294 |          |       |     | <i>C5orf38</i>  | Body    |
| cg14076258 | 11 | 77,183,807  | 2.43E-07 | 0.265 | 0.257 |          |       |     | <i>PAK1</i>     | 5'UTR   |
| cg15033068 | 19 | 3,801,922   | 6.3E-07  | 0.265 | 0.278 |          |       |     | <i>MATK</i>     | TSS200  |
| cg07044708 | 15 | 75,471,034  | 7.66E-07 | 0.265 | 0.257 |          |       |     |                 |         |
| cg16356622 | 1  | 36,351,841  | 1.12E-16 | 0.265 | 0.253 |          |       |     | <i>EIF2C1</i>   | Body    |
| cg20189244 | 7  | 96,648,205  | 1.43E-10 | 0.265 | 0.257 |          |       |     |                 |         |
| cg19465165 | 2  | 131,130,103 | 0.002118 | 0.265 | 0.212 |          |       |     | <i>PTPN18</i>   | Body    |
| cg05349016 | 17 | 43,170,343  | 2.28E-12 | 0.265 | 0.270 |          |       |     | <i>NMT1</i>     | Body    |
| cg10397678 | 14 | 103,655,712 | 6.23E-11 | 0.265 | 0.256 |          |       |     |                 |         |
| cg07157030 | 14 | 63,671,356  | 9.13E-08 | 0.265 | 0.236 |          |       |     | <i>RHOJ</i>     | 5'UTR   |
| cg10422777 | 9  | 79,631,227  | 1.56E-05 | 0.265 | 0.222 |          |       |     |                 |         |
| cg02115781 | 2  | 172,175,273 | 3.26E-15 | 0.265 | 0.238 |          |       |     | <i>METTL8</i>   | 3'UTR   |
| cg03955537 | 17 | 80,806,388  | 2.03E-10 | 0.264 | 0.286 |          |       |     | <i>TBCD</i>     | Body    |
| cg01055281 | 16 | 50,746,052  | 6E-09    | 0.264 | 0.215 |          |       |     | <i>NOD2</i>     | Body    |
| cg07165066 | 13 | 23,952,576  | 8.11E-06 | 0.264 | 0.238 |          |       |     | <i>SACS</i>     | Body    |
| cg19529551 | 3  | 133,615,241 | 2.16E-07 | 0.264 | 0.187 |          |       |     | <i>RAB6B</i>    | TSS1500 |
| cg08149253 | 22 | 45,899,292  | 3.59E-08 | 0.264 | 0.225 |          |       |     | <i>FBLN1</i>    | Body    |
| cg12459718 | 17 | 8,129,997   | 0.001013 | 0.264 | 0.193 |          |       |     | <i>C17orf68</i> | 3'UTR   |
| cg22110896 | 17 | 59,533,081  | 8.06E-16 | 0.264 | 0.238 |          |       |     | <i>TBX4</i>     | TSS1500 |
| cg23003534 | 10 | 105,036,747 | 0.018985 | 0.264 | 0.250 |          |       |     | <i>INA</i>      | TSS200  |

|            |    |             |          |       |       |           |       |     |  |                     |         |
|------------|----|-------------|----------|-------|-------|-----------|-------|-----|--|---------------------|---------|
| cg01178624 | 11 | 65,360,327  | 0.001379 | 0.264 | 0.267 |           |       |     |  | <i>KCNK7</i>        | 3'UTR   |
| cg15809959 | 17 | 36,720,382  | 3.26E-06 | 0.264 | 0.270 |           |       |     |  | <i>SRCIN1</i>       | Body    |
| cg16525435 | 3  | 193,994,972 | 1.25E-18 | 0.264 | 0.252 |           |       |     |  |                     |         |
| cg22737624 | 5  | 140,750,111 | 0.002197 | 0.264 | 0.317 |           |       |     |  | <i>PCDHGA4</i>      | Body    |
| cg25572105 | 7  | 95,025,955  | 0.000232 | 0.264 | 0.212 |           |       |     |  | <i>PON3</i>         | TSS1500 |
| cg26697605 | 7  | 1,850,801   | 0.028803 | 0.264 | 0.172 |           |       |     |  |                     |         |
| cg04454571 | 11 | 61,525,216  | 2.41E-20 | 0.264 | 0.254 |           |       |     |  | <i>DKFZP434K028</i> | TSS200  |
| cg08615596 | 12 | 68,758,840  | 6.26E-06 | 0.264 | 0.241 |           |       |     |  |                     |         |
| cg13340269 | X  | 100,333,778 | 0.007855 | 0.264 | 0.283 | 4.73E-07  | 0.112 |     |  | <i>TMEM35</i>       | TSS200  |
| cg16649560 | 16 | 27,338,391  | 4.4E-13  | 0.264 | 0.259 |           |       |     |  | <i>IL4R</i>         | 5'UTR   |
| cg21122225 | 2  | 238,832,508 | 0.00778  | 0.264 | 0.167 |           |       |     |  |                     |         |
| cg22153181 | 4  | 172,734,431 | 3.47E-05 | 0.264 | 0.281 |           |       |     |  | <i>GALNTL6</i>      | TSS200  |
| cg25753817 | 2  | 191,208,232 | 0.000833 | 0.264 | 0.143 | 3.2E-19   | 0.171 |     |  | <i>INPP1</i>        | 1stExon |
| cg00864474 | 17 | 9,143,838   | 0.001444 | 0.264 | 0.202 |           |       |     |  | <i>NTN1</i>         | 3'UTR   |
| cg06377106 | 1  | 20,618,331  | 9.73E-06 | 0.264 | 0.235 |           |       |     |  | <i>VWA5B1</i>       | 5'UTR   |
| cg19611886 | 8  | 103,821,171 | 1.13E-09 | 0.264 | 0.268 |           |       |     |  |                     |         |
| cg22372930 | 19 | 55,630,001  | 1.7E-07  | 0.264 | 0.279 |           |       |     |  | <i>PPP1R12C</i>     | TSS1500 |
| cg26557756 | 7  | 42,278,096  | 7.45E-13 | 0.264 | 0.281 |           |       |     |  | <i>GLI3</i>         | TSS1500 |
| cg18499443 | 10 | 100,993,553 | 8.99E-05 | 0.264 | 0.279 |           |       |     |  | <i>HPSE2</i>        | Body    |
| cg19883384 | 8  | 25,905,478  | 0.002522 | 0.264 | 0.226 |           |       |     |  |                     |         |
| cg00834796 | 5  | 147,161,924 | 0.000294 | 0.264 | 0.219 | 0.0000353 | 0.078 | Yes |  | <i>JAKMIP2</i>      | 5'UTR   |
| cg02779592 | X  | 99,899,134  | 0.000243 | 0.264 | 0.281 |           |       |     |  | <i>SRPX2</i>        | TSS200  |
| cg19016332 | 1  | 179,545,294 | 9.21E-05 | 0.264 | 0.216 |           |       |     |  | <i>NPHS2</i>        | TSS1500 |
| cg05571970 | 6  | 166,422,182 | 1.97E-06 | 0.264 | 0.226 |           |       |     |  |                     |         |
| cg09400316 | 6  | 12,957,697  | 0.010568 | 0.264 | 0.244 |           |       |     |  | <i>PHACTR1</i>      | Body    |
| cg09683350 | 15 | 89,914,466  | 0.000246 | 0.264 | 0.180 |           |       |     |  |                     |         |
| cg02059509 | 10 | 30,405,144  | 3.24E-06 | 0.264 | 0.240 |           |       |     |  |                     |         |
| cg03281561 | 3  | 159,942,181 | 0.001965 | 0.264 | 0.317 |           |       |     |  | <i>LOC401097</i>    | TSS1500 |
| cg20291321 | X  | 36,981,602  | 0.00195  | 0.264 | 0.335 |           |       |     |  |                     |         |
| cg15962744 | 12 | 114,328,074 | 1.91E-11 | 0.264 | 0.255 |           |       |     |  | <i>RBM19</i>        | Body    |
| cg17568707 | 6  | 137,818,327 | 0.000394 | 0.264 | 0.276 |           |       |     |  |                     |         |
| cg04392209 | X  | 119,124,215 | 0.013448 | 0.264 | 0.353 |           |       |     |  |                     |         |
| cg06469542 | 14 | 77,965,869  | 1.24E-11 | 0.264 | 0.246 |           |       |     |  | <i>ISM2</i>         | TSS1500 |
| cg26630231 | 13 | 112,726,482 | 0.011589 | 0.264 | 0.338 |           |       |     |  |                     |         |

|            |    |             |          |       |       |  |  |     |                  |         |
|------------|----|-------------|----------|-------|-------|--|--|-----|------------------|---------|
| cg00834923 | 16 | 85,393,998  | 3.51E-12 | 0.264 | 0.246 |  |  |     |                  |         |
| cg05265607 | 10 | 98,900,817  | 5.76E-07 | 0.264 | 0.305 |  |  | Yes | <i>SLIT1</i>     | Body    |
| cg26332310 | 1  | 91,182,305  | 0.000645 | 0.264 | 0.295 |  |  |     | <i>BARHL2</i>    | 1stExon |
| cg09333785 | 4  | 8,202,491   | 0.000307 | 0.264 | 0.240 |  |  |     | <i>SH3TC1</i>    | 5'UTR   |
| cg20100910 | 10 | 102,475,429 | 0.034888 | 0.264 | 0.357 |  |  |     |                  |         |
| cg23318812 | 12 | 66,123,127  | 0.028233 | 0.264 | 0.282 |  |  |     |                  |         |
| cg03911745 | 8  | 49,486,641  | 2.71E-17 | 0.264 | 0.286 |  |  |     |                  |         |
| cg21903817 | 17 | 56,406,118  | 2.51E-05 | 0.264 | 0.287 |  |  |     | <i>BZRAP1</i>    | 1stExon |
| cg02238178 | 22 | 37,545,969  | 3.6E-05  | 0.264 | 0.211 |  |  |     | <i>IL2RB</i>     | TSS200  |
| cg17178761 | 17 | 55,682,851  | 1.92E-05 | 0.264 | 0.205 |  |  |     | <i>MSI2</i>      | Body    |
| cg05215004 | 6  | 6,546,556   | 0.005202 | 0.264 | 0.152 |  |  |     | <i>LOC285780</i> | Body    |
| cg13871633 | 3  | 42,947,385  | 0.011323 | 0.264 | 0.155 |  |  |     | <i>ZNF662</i>    | TSS1500 |
| cg06204062 | 3  | 116,164,512 | 0.00017  | 0.264 | 0.210 |  |  |     | <i>LSAMP</i>     | TSS200  |
| cg17969560 | 11 | 65,324,768  | 6.85E-18 | 0.264 | 0.234 |  |  |     | <i>LTBP3</i>     | Body    |
| cg18309255 | 2  | 218,179,272 | 4.42E-10 | 0.264 | 0.220 |  |  |     | <i>DIRC3</i>     | Body    |
| cg22578916 | 6  | 31,830,651  | 0.035959 | 0.264 | 0.238 |  |  |     | <i>NEU1</i>      | 5'UTR   |
| cg02855778 | 7  | 157,462,914 | 2.1E-15  | 0.264 | 0.234 |  |  |     | <i>PTPRN2</i>    | Body    |
| cg04986899 | 16 | 17,553,784  | 1.41E-24 | 0.264 | 0.264 |  |  |     | <i>XYLT1</i>     | Body    |
| cg17453456 | 1  | 156,094,519 | 2.33E-16 | 0.264 | 0.266 |  |  |     | <i>LMNA</i>      | Body    |
| cg01601050 | 14 | 25,519,778  | 0.007848 | 0.264 | 0.216 |  |  |     | <i>STXBP6</i>    | TSS1500 |
| cg17495715 | 2  | 176,950,273 | 2.69E-06 | 0.264 | 0.269 |  |  |     |                  |         |
| cg04361551 | 3  | 134,125,573 | 0.044813 | 0.264 | 0.357 |  |  |     |                  |         |
| cg24903893 | 5  | 158,522,515 | 6.73E-05 | 0.264 | 0.264 |  |  |     | <i>EBF1</i>      | Body    |
| cg03224396 | 1  | 221,017,300 | 0.002473 | 0.264 | 0.266 |  |  |     |                  |         |
| cg08838158 | 2  | 118,594,167 | 6.6E-36  | 0.264 | 0.247 |  |  |     |                  |         |
| cg19240857 | 6  | 31,683,109  | 4.98E-20 | 0.264 | 0.257 |  |  |     | <i>LY6G6E</i>    | TSS1500 |
| cg23610453 | 10 | 79,470,966  | 8.5E-08  | 0.264 | 0.162 |  |  |     |                  |         |
| cg06204711 | 1  | 119,528,424 | 0.002318 | 0.264 | 0.340 |  |  |     | <i>TBX15</i>     | 5'UTR   |
| cg09778422 | X  | 64,887,118  | 1.05E-07 | 0.264 | 0.189 |  |  |     | <i>MSN</i>       | TSS1500 |
| cg13770461 | 11 | 46,016,312  | 1.27E-13 | 0.264 | 0.262 |  |  |     | <i>PHF21A</i>    | Body    |
| cg15459780 | 12 | 104,609,980 | 1.26E-06 | 0.264 | 0.257 |  |  |     | <i>TXNRD1</i>    | Body    |
| cg19339179 | 4  | 113,324,678 | 3.3E-24  | 0.264 | 0.249 |  |  |     | <i>ALPK1</i>     | Body    |
| cg27638727 | 5  | 36,066,944  | 3.02E-06 | 0.264 | 0.209 |  |  |     | <i>UGT3A2</i>    | 1stExon |
| cg02593205 | 12 | 26,348,343  | 0.020109 | 0.264 | 0.210 |  |  |     | <i>SSPN</i>      | 5'UTR   |

|            |    |             |          |       |       |  |  |  |                     |         |
|------------|----|-------------|----------|-------|-------|--|--|--|---------------------|---------|
| cg18234115 | 1  | 245,673,856 | 7.66E-06 | 0.264 | 0.279 |  |  |  | <i>KIF26B</i>       | Body    |
| cg13080487 | 11 | 34,622,359  | 8.2E-05  | 0.264 | 0.260 |  |  |  |                     |         |
| cg22592160 | 5  | 124,995,555 | 8.84E-11 | 0.264 | 0.276 |  |  |  |                     |         |
| cg22747746 | 8  | 23,564,193  | 5.17E-05 | 0.264 | 0.250 |  |  |  | <i>NKX2-6</i>       | TSS1500 |
| cg21692666 | 1  | 17,199,302  | 7.65E-06 | 0.264 | 0.272 |  |  |  |                     |         |
| cg00319774 | 8  | 33,455,184  | 0.000834 | 0.264 | 0.234 |  |  |  | <i>DUSP26</i>       | 5'UTR   |
| cg13114497 | 22 | 18,986,775  | 0.001354 | 0.264 | 0.275 |  |  |  |                     |         |
| cg06085011 | 4  | 54,965,999  | 0.001439 | 0.264 | 0.270 |  |  |  | <i>GSX2</i>         | TSS1500 |
| cg02892772 | 1  | 44,991,042  | 3.07E-24 | 0.264 | 0.244 |  |  |  | <i>RNF220</i>       | Body    |
| cg13951311 | 9  | 139,499,374 | 6.14E-07 | 0.264 | 0.237 |  |  |  |                     |         |
| cg19188306 | 11 | 111,410,935 | 4.73E-12 | 0.264 | 0.231 |  |  |  | <i>LAYN</i>         | TSS1500 |
| cg22249789 | 2  | 63,284,574  | 9.31E-06 | 0.264 | 0.237 |  |  |  |                     |         |
| cg14608318 | 19 | 17,392,429  | 0.019131 | 0.264 | 0.242 |  |  |  | <i>ANKLE1</i>       | TSS200  |
| cg20377627 | 16 | 23,194,721  | 0.001121 | 0.264 | 0.176 |  |  |  | <i>SCNN1G</i>       | 5'UTR   |
| cg03161476 | 1  | 203,596,940 | 0.028312 | 0.264 | 0.360 |  |  |  | <i>ATP2B4</i>       | 5'UTR   |
| cg03704700 | 16 | 75,529,019  | 0.00615  | 0.264 | 0.223 |  |  |  | <i>CHST6</i>        | TSS200  |
| cg01548300 | 5  | 10,333,766  | 0.0194   | 0.264 | 0.286 |  |  |  |                     |         |
| cg02751731 | 20 | 642,436     | 0.000132 | 0.264 | 0.292 |  |  |  | <i>SCRT2</i>        | 3'UTR   |
| cg17839721 | 2  | 97,193,174  | 0.001822 | 0.264 | 0.350 |  |  |  |                     |         |
| cg13802013 | 20 | 37,303,351  | 2.18E-08 | 0.264 | 0.203 |  |  |  |                     |         |
| cg20036207 | 19 | 10,397,031  | 3.11E-12 | 0.264 | 0.253 |  |  |  | <i>ICAM4</i>        | TSS1500 |
| cg15120085 | 1  | 32,041,898  | 4.73E-05 | 0.264 | 0.209 |  |  |  | <i>TINAGL1</i>      | TSS200  |
| cg16726201 | X  | 49,087,385  | 4.37E-05 | 0.264 | 0.255 |  |  |  | <i>CACNA1F</i>      | Body    |
| cg20312012 | 2  | 97,331,035  | 3.45E-14 | 0.264 | 0.249 |  |  |  | <i>FER1L5</i>       | Body    |
| cg06192497 | 2  | 63,276,216  | 0.024703 | 0.264 | 0.271 |  |  |  | <i>LOC100132215</i> | TSS1500 |
| cg02493798 | 17 | 6,899,577   | 7.32E-10 | 0.264 | 0.209 |  |  |  | <i>ALOX12</i>       | Body    |
| cg12091944 | 2  | 215,675,105 | 0.000323 | 0.264 | 0.169 |  |  |  | <i>BARD1</i>        | TSS1500 |
| cg12351587 | 4  | 85,405,251  | 6.81E-06 | 0.264 | 0.209 |  |  |  |                     |         |
| cg04194947 | 2  | 177,012,191 | 8.23E-09 | 0.263 | 0.225 |  |  |  |                     |         |
| cg10603004 | 8  | 23,564,294  | 0.00043  | 0.263 | 0.225 |  |  |  | <i>NKX2-6</i>       | TSS1500 |
| cg15441392 | 8  | 25,900,020  | 1.96E-06 | 0.263 | 0.223 |  |  |  | <i>EBF2</i>         | Body    |
| cg19046826 | 17 | 48,546,297  | 0.001281 | 0.263 | 0.228 |  |  |  | <i>CHAD</i>         | TSS200  |
| cg02155658 | 20 | 21,690,036  | 3.56E-06 | 0.263 | 0.282 |  |  |  | <i>PAX1</i>         | Body    |
| cg03163783 | 2  | 200,326,591 | 2.94E-07 | 0.263 | 0.250 |  |  |  | <i>SATB2</i>        | TSS1500 |

|            |    |             |          |       |       |          |       |  |                  |         |
|------------|----|-------------|----------|-------|-------|----------|-------|--|------------------|---------|
| cg05781984 | 6  | 43,237,642  | 2.22E-09 | 0.263 | 0.256 |          |       |  | <i>TTBK1</i>     | Body    |
| cg02681370 | 6  | 32,156,482  | 0.001087 | 0.263 | 0.253 |          |       |  | <i>PBX2</i>      | Body    |
| cg16764274 | 2  | 223,290,168 | 3.35E-14 | 0.263 | 0.246 |          |       |  | <i>SGPP2</i>     | Body    |
| cg24164254 | 9  | 137,329,341 | 1.51E-10 | 0.263 | 0.256 |          |       |  | <i>RXRA</i>      | 3'UTR   |
| cg08871052 | 2  | 42,274,619  | 0.042657 | 0.263 | 0.300 |          |       |  | <i>PKDCC</i>     | TSS1500 |
| cg04544858 | 5  | 67,489,737  | 1.38E-08 | 0.263 | 0.297 |          |       |  |                  |         |
| cg27324426 | 19 | 58,220,837  | 8.3E-05  | 0.263 | 0.232 |          |       |  | <i>ZNF154</i>    | TSS1500 |
| cg04605287 | 1  | 54,953,486  | 0.002889 | 0.263 | 0.189 |          |       |  |                  |         |
| cg15540820 | 3  | 27,765,283  | 0.002252 | 0.263 | 0.231 | 3.38E-10 | 0.168 |  | <i>EOMES</i>     | TSS1500 |
| cg24559969 | X  | 111,326,800 | 3.72E-05 | 0.263 | 0.270 |          |       |  | <i>TRPC5</i>     | TSS1500 |
| cg03671597 | 17 | 27,333,463  | 0.000105 | 0.263 | 0.282 |          |       |  | <i>SEZ6</i>      | TSS1500 |
| cg13050240 | 14 | 24,809,068  | 3.76E-06 | 0.263 | 0.227 |          |       |  | <i>RIPK3</i>     | 5'UTR   |
| cg02134353 | 6  | 108,440,118 | 0.001726 | 0.263 | 0.274 |          |       |  |                  |         |
| cg14429204 | 1  | 16,553,327  | 9.69E-07 | 0.263 | 0.231 |          |       |  |                  |         |
| cg15644764 | 1  | 202,592,914 | 7.64E-13 | 0.263 | 0.261 |          |       |  | <i>SYT2</i>      | 5'UTR   |
| cg17920789 | 13 | 47,152,525  | 8.5E-07  | 0.263 | 0.261 |          |       |  | <i>LRCH1</i>     | Body    |
| cg01243371 | 16 | 86,547,386  | 0.002258 | 0.263 | 0.268 |          |       |  | <i>FOXF1</i>     | 3'UTR   |
| cg09502015 | 5  | 87,441,873  | 3.27E-08 | 0.263 | 0.263 |          |       |  |                  |         |
| cg07448742 | 6  | 30,657,984  | 4.73E-25 | 0.263 | 0.255 |          |       |  | <i>NRM</i>       | Body    |
| cg08770870 | 17 | 154,410     | 0.002768 | 0.263 | 0.211 |          |       |  | <i>RPH3AL</i>    | Body    |
| cg10588962 | 17 | 46,667,587  | 5.8E-12  | 0.263 | 0.246 |          |       |  | <i>LOC404266</i> | TSS1500 |
| cg14515614 | 9  | 116,969,440 | 6.1E-11  | 0.263 | 0.286 |          |       |  | <i>COL27A1</i>   | Body    |
| cg23827488 | 6  | 24,908,452  | 6.07E-05 | 0.263 | 0.200 |          |       |  | <i>FAM65B</i>    | 5'UTR   |
| cg26056498 | 8  | 1,030,319   | 0.04863  | 0.263 | 0.232 |          |       |  |                  |         |
| cg01097384 | 11 | 1,358,675   | 4.96E-07 | 0.263 | 0.290 |          |       |  |                  |         |
| cg01423335 | 13 | 93,881,110  | 0.000627 | 0.263 | 0.189 |          |       |  | <i>GPC6</i>      | Body    |
| cg04927537 | 17 | 76,976,091  | 0.001579 | 0.263 | 0.215 |          |       |  | <i>LGALS3BP</i>  | TSS200  |
| cg07931411 | 19 | 15,580,721  | 0.036071 | 0.263 | 0.359 |          |       |  | <i>PGLYRP2</i>   | Body    |
| cg10189661 | 6  | 31,683,120  | 1.25E-16 | 0.263 | 0.241 |          |       |  | <i>LY6G6E</i>    | TSS1500 |
| cg20600729 | 12 | 50,344,475  | 2.44E-16 | 0.263 | 0.244 |          |       |  | <i>AQP2</i>      | TSS200  |
| cg21209395 | 9  | 35,406,764  | 1.51E-05 | 0.263 | 0.183 |          |       |  | <i>LOC158381</i> | Body    |
| cg11674130 | 22 | 50,523,689  | 6E-11    | 0.263 | 0.252 |          |       |  | <i>MLC1</i>      | 5'UTR   |
| cg18164611 | 1  | 46,958,628  | 4.38E-07 | 0.263 | 0.269 |          |       |  |                  |         |
| cg09457469 | 17 | 7,197,507   | 0.021535 | 0.263 | 0.133 |          |       |  | <i>YBX2</i>      | Body    |



|            |    |             |          |       |       |           |       |  |                  |         |
|------------|----|-------------|----------|-------|-------|-----------|-------|--|------------------|---------|
| cg19403377 | 17 | 53,800,225  | 0.004705 | 0.263 | 0.284 |           |       |  | <i>TMEM100</i>   | TSS200  |
| cg15126975 | 2  | 175,208,605 | 0.018988 | 0.263 | 0.292 |           |       |  |                  |         |
| cg03352428 | 19 | 51,843,601  | 1.75E-08 | 0.263 | 0.243 |           |       |  | <i>VSIG10L</i>   | Body    |
| cg07595602 | 1  | 240,783,371 | 0.001192 | 0.263 | 0.184 |           |       |  |                  |         |
| cg20956278 | 22 | 38,478,457  | 3.95E-06 | 0.263 | 0.278 |           |       |  | <i>SLC16A8</i>   | Body    |
| cg07821354 | 19 | 6,768,010   | 0.004605 | 0.263 | 0.157 |           |       |  | <i>SH2D3A</i>    | TSS1500 |
| cg26783057 | 10 | 118,891,670 | 0.022621 | 0.263 | 0.314 |           |       |  | <i>VAX1</i>      | 3'UTR   |
| cg15982700 | 7  | 27,154,911  | 3.52E-09 | 0.263 | 0.248 |           |       |  | <i>HOXA3</i>     | 5'UTR   |
| cg12304520 | 5  | 140,810,123 | 0.002791 | 0.263 | 0.303 |           |       |  | <i>PCDHGA4</i>   | Body    |
| cg01397141 | 15 | 79,502,137  | 0.001665 | 0.263 | 0.268 |           |       |  | <i>MIR184</i>    | Body    |
| cg01856645 | 5  | 78,365,647  | 3.35E-09 | 0.263 | 0.209 |           |       |  | <i>DMGDH</i>     | TSS200  |
| cg01883425 | 6  | 41,606,770  | 0.009255 | 0.263 | 0.184 |           |       |  | <i>MDFI</i>      | Body    |
| cg03790740 | 13 | 24,337,521  | 3.03E-16 | 0.263 | 0.257 |           |       |  | <i>MIPEP</i>     | Body    |
| cg18741958 | 3  | 124,913,784 | 1.05E-10 | 0.263 | 0.216 |           |       |  | <i>SLC12A8</i>   | Body    |
| cg16793187 | 11 | 115,530,431 | 8.25E-05 | 0.263 | 0.221 |           |       |  |                  |         |
| cg07642638 | 20 | 5,891,786   | 2.31E-06 | 0.263 | 0.193 | 3.9E-23   | 0.147 |  | <i>CHGB</i>      | TSS200  |
| cg15792653 | 10 | 118,924,342 | 4.83E-05 | 0.263 | 0.281 |           |       |  |                  |         |
| cg08034379 | 2  | 228,736,324 | 0.004495 | 0.263 | 0.299 |           |       |  | <i>WDR69</i>     | TSS200  |
| cg02381279 | 19 | 16,394,366  | 5.21E-09 | 0.263 | 0.266 |           |       |  |                  |         |
| cg22321572 | 6  | 168,225,923 | 9.06E-10 | 0.263 | 0.207 |           |       |  | <i>C6orf124</i>  | Body    |
| cg25296103 | 2  | 145,268,533 | 2.69E-08 | 0.263 | 0.253 |           |       |  | <i>ZEB2</i>      | Body    |
| cg19762657 | 2  | 95,692,524  | 7.32E-06 | 0.263 | 0.232 |           |       |  | <i>MAL</i>       | Body    |
| cg07152196 | 2  | 87,016,436  | 0.000362 | 0.263 | 0.298 |           |       |  | <i>CD8A</i>      | Body    |
| cg00727673 | 3  | 53,190,763  | 2.22E-11 | 0.263 | 0.240 |           |       |  |                  |         |
| cg16573755 | 2  | 172,958,337 | 0.002472 | 0.263 | 0.235 |           |       |  |                  |         |
| cg05294159 | 17 | 43,047,548  | 1.13E-13 | 0.263 | 0.262 |           |       |  |                  |         |
| cg18049571 | 8  | 54,791,151  | 5.94E-07 | 0.263 | 0.225 |           |       |  | <i>RGS20</i>     | Body    |
| cg05429448 | 3  | 101,659,630 | 6.37E-10 | 0.263 | 0.268 |           |       |  | <i>LOC152225</i> | TSS200  |
| cg06482188 | 17 | 77,644,545  | 1.74E-16 | 0.263 | 0.260 |           |       |  |                  |         |
| cg17264618 | 3  | 40,429,014  | 0.000641 | 0.263 | 0.212 | 1.15E-18  | 0.201 |  | <i>ENTPD3</i>    | 5'UTR   |
| cg22502502 | 6  | 25,962,567  | 0.000509 | 0.263 | 0.259 | 0.0002059 | 0.119 |  | <i>TRIM38</i>    | TSS1500 |
| cg06559274 | 6  | 108,487,903 | 0.001945 | 0.263 | 0.330 |           |       |  | <i>NR2E1</i>     | 5'UTR   |
| cg04255230 | 2  | 74,727,010  | 8.34E-22 | 0.263 | 0.258 |           |       |  | <i>LBX2</i>      | Body    |
| cg05111603 | 4  | 38,213,171  | 2.92E-10 | 0.263 | 0.289 |           |       |  |                  |         |

|            |    |             |          |       |       |  |  |  |                     |         |
|------------|----|-------------|----------|-------|-------|--|--|--|---------------------|---------|
| cg14171486 | 1  | 155,139,557 | 2.02E-06 | 0.263 | 0.292 |  |  |  |                     |         |
| cg16536399 | 18 | 77,230,665  | 2.01E-14 | 0.263 | 0.262 |  |  |  | <i>NFATC1</i>       | Body    |
| cg18044383 | 18 | 59,001,158  | 9.83E-05 | 0.263 | 0.266 |  |  |  |                     |         |
| cg24727399 | 4  | 122,302,265 | 0.029576 | 0.263 | 0.267 |  |  |  | <i>QRFPR</i>        | TSS200  |
| cg04947764 | 15 | 79,502,127  | 0.002468 | 0.263 | 0.276 |  |  |  | <i>MIR184</i>       | TSS200  |
| cg12059864 | 6  | 111,989,790 | 7.32E-17 | 0.263 | 0.272 |  |  |  | <i>FYN</i>          | Body    |
| cg12924309 | 12 | 125,105,776 | 9.78E-20 | 0.263 | 0.249 |  |  |  |                     |         |
| cg03461110 | 7  | 4,778,881   | 4.48E-15 | 0.263 | 0.246 |  |  |  | <i>FOXK1</i>        | Body    |
| cg13532885 | X  | 47,478,770  | 0.007034 | 0.263 | 0.181 |  |  |  | <i>SYN1</i>         | 1stExon |
| cg13469595 | 1  | 111,813,852 | 6.06E-06 | 0.263 | 0.294 |  |  |  |                     |         |
| cg04724735 | 19 | 7,927,554   | 0.003625 | 0.263 | 0.261 |  |  |  | <i>EVI5L</i>        | Body    |
| cg06840491 | 10 | 48,416,966  | 1.28E-16 | 0.263 | 0.250 |  |  |  | <i>GDF2</i>         | TSS200  |
| cg19443023 | 17 | 78,923,344  | 2.76E-65 | 0.263 | 0.262 |  |  |  | <i>RPTOR</i>        | Body    |
| cg02571142 | 8  | 42,234,803  | 3.86E-19 | 0.263 | 0.256 |  |  |  | <i>DKK4</i>         | TSS200  |
| cg03202564 | 10 | 50,977,130  | 4.7E-06  | 0.263 | 0.270 |  |  |  |                     |         |
| cg23697796 | 10 | 93,334,974  | 2.96E-09 | 0.263 | 0.257 |  |  |  | <i>LOC100188947</i> | Body    |
| cg19377250 | 7  | 100,463,206 | 6.05E-19 | 0.263 | 0.237 |  |  |  | <i>SLC12A9</i>      | Body    |
| cg19971716 | 4  | 122,301,740 | 0.011902 | 0.263 | 0.239 |  |  |  | <i>QRFPR</i>        | 1stExon |
| cg01796166 | 14 | 95,239,586  | 0.000252 | 0.263 | 0.268 |  |  |  |                     |         |
| cg24559983 | 21 | 38,592,988  | 0.009212 | 0.263 | 0.132 |  |  |  |                     |         |
| cg03366986 | 17 | 59,530,021  | 2.79E-06 | 0.263 | 0.254 |  |  |  |                     |         |
| cg05986505 | 8  | 99,955,563  | 5.7E-12  | 0.263 | 0.260 |  |  |  | <i>OSR2</i>         | TSS1500 |
| cg04642923 | 11 | 33,398,366  | 0.007176 | 0.263 | 0.204 |  |  |  |                     |         |
| cg19691778 | 8  | 97,157,756  | 0.001502 | 0.263 | 0.220 |  |  |  | <i>GDF6</i>         | Body    |
| cg08983097 | 6  | 117,586,538 | 0.000294 | 0.263 | 0.293 |  |  |  | <i>VGLL2</i>        | TSS200  |
| cg19559891 | 15 | 31,515,984  | 6.09E-06 | 0.263 | 0.287 |  |  |  |                     |         |
| cg23082339 | 5  | 140,810,051 | 0.027361 | 0.263 | 0.335 |  |  |  | <i>PCDHGA4</i>      | Body    |
| cg04421553 | 3  | 38,036,060  | 0.021393 | 0.263 | 0.107 |  |  |  | <i>VILL</i>         | Body    |
| cg00093087 | 12 | 50,344,548  | 1.23E-43 | 0.263 | 0.240 |  |  |  | <i>AQP2</i>         | 5'UTR   |
| cg17298239 | 18 | 3,499,253   | 0.046858 | 0.263 | 0.165 |  |  |  | <i>DLGAP1</i>       | Body    |
| cg04003850 | 3  | 192,126,165 | 0.026284 | 0.263 | 0.242 |  |  |  | <i>FGF12</i>        | 5'UTR   |
| cg15351951 | 18 | 2,907,472   | 7.76E-07 | 0.263 | 0.245 |  |  |  | <i>EMILIN2</i>      | Body    |
| cg15826810 | 4  | 124,572,578 | 0.000283 | 0.263 | 0.174 |  |  |  | <i>LOC285419</i>    | TSS1500 |
| cg27295642 | 5  | 74,952,444  | 0.00278  | 0.263 | 0.174 |  |  |  |                     |         |

|            |    |             |          |       |       |           |       |  |                |         |
|------------|----|-------------|----------|-------|-------|-----------|-------|--|----------------|---------|
| cg23520422 | 12 | 76,423,956  | 0.007249 | 0.263 | 0.113 |           |       |  | <i>PHLDA1</i>  | 3'UTR   |
| cg24336989 | 6  | 10,385,903  | 0.003261 | 0.263 | 0.286 |           |       |  |                |         |
| cg25429719 | 2  | 208,989,324 | 9.06E-07 | 0.263 | 0.273 |           |       |  | <i>CRYGD</i>   | TSS200  |
| cg19592235 | 15 | 65,360,486  | 0.016453 | 0.263 | 0.168 |           |       |  | <i>RASL12</i>  | TSS200  |
| cg02923856 | 3  | 23,989,124  | 7.57E-16 | 0.263 | 0.275 |           |       |  | <i>NR1D2</i>   | 5'UTR   |
| cg10390305 | 15 | 70,878,049  | 4.38E-05 | 0.263 | 0.196 |           |       |  |                |         |
| cg06746118 | 10 | 118,922,887 | 0.028128 | 0.263 | 0.279 |           |       |  |                |         |
| cg02177231 | 1  | 119,529,930 | 0.004221 | 0.263 | 0.182 |           |       |  | <i>TBX15</i>   | 5'UTR   |
| cg08198377 | 14 | 51,707,975  | 8.26E-06 | 0.263 | 0.227 |           |       |  | <i>TMX1</i>    | Body    |
| cg08762432 | 10 | 21,358,991  | 3.68E-08 | 0.263 | 0.268 |           |       |  | <i>NEBL</i>    | Body    |
| cg03152187 | 17 | 75,417,165  | 0.005665 | 0.263 | 0.152 |           |       |  | <i>SEPT9</i>   | Body    |
| cg23728669 | 11 | 63,258,734  | 0.045683 | 0.263 | 0.228 |           |       |  | <i>HRASLS5</i> | TSS200  |
| cg04118124 | 1  | 43,231,249  | 2.72E-05 | 0.263 | 0.143 |           |       |  | <i>LEPRE1</i>  | Body    |
| cg06478085 | 19 | 33,876,779  | 2.15E-14 | 0.263 | 0.268 |           |       |  |                |         |
| cg08034070 | 17 | 40,805,868  | 0.049352 | 0.263 | 0.131 |           |       |  |                |         |
| cg14269973 | 13 | 46,425,904  | 0.001928 | 0.263 | 0.235 |           |       |  | <i>SIAH3</i>   | TSS200  |
| cg00768359 | 19 | 51,456,308  | 0.004039 | 0.263 | 0.275 |           |       |  | <i>KLK5</i>    | 5'UTR   |
| cg05301470 | 6  | 28,558,006  | 1.04E-05 | 0.263 | 0.266 |           |       |  |                |         |
| cg19480198 | 19 | 18,896,853  | 1.68E-08 | 0.263 | 0.217 |           |       |  | <i>COMP</i>    | Body    |
| cg21032564 | 15 | 65,381,956  | 1.92E-17 | 0.263 | 0.243 |           |       |  |                |         |
| cg12995113 | 11 | 123,008,408 | 1.92E-05 | 0.263 | 0.157 |           |       |  | <i>ASAM</i>    | Body    |
| cg08775137 | 4  | 41,880,319  | 7.93E-11 | 0.262 | 0.262 |           |       |  |                |         |
| cg26470798 | 16 | 54,971,598  | 3.33E-06 | 0.262 | 0.264 |           |       |  |                |         |
| cg01850783 | 6  | 129,204,540 | 0.011301 | 0.262 | 0.320 |           |       |  | <i>LAMA2</i>   | Body    |
| cg17634781 | 4  | 186,508,880 | 5.58E-10 | 0.262 | 0.269 |           |       |  | <i>SORBS2</i>  | Body    |
| cg25451303 | 19 | 30,720,025  | 0.001583 | 0.262 | 0.244 |           |       |  |                |         |
| cg06152533 | 3  | 3,840,333   | 0.037266 | 0.262 | 0.059 |           |       |  | <i>LRRN1</i>   | TSS1500 |
| cg10199763 | 14 | 24,458,299  | 2.54E-08 | 0.262 | 0.250 |           |       |  | <i>DHRS4L2</i> | Body    |
| cg15159104 | 15 | 43,809,865  | 8.35E-14 | 0.262 | 0.243 |           |       |  | <i>MAP1A</i>   | 5'UTR   |
| cg17820591 | 17 | 4,853,706   | 0.015626 | 0.262 | 0.204 | 8.44E-19  | 0.157 |  | <i>ENO3</i>    | TSS1500 |
| cg21267231 | 15 | 45,406,706  | 2.84E-06 | 0.262 | 0.236 |           |       |  | <i>DUOXA2</i>  | 1stExon |
| cg16624888 | 12 | 109,711,141 | 3.89E-11 | 0.262 | 0.268 |           |       |  |                |         |
| cg00767581 | 2  | 177,015,125 | 2.6E-08  | 0.262 | 0.211 | 0.0000543 | 0.072 |  | <i>HOXD4</i>   | TSS1500 |
| cg10589443 | 7  | 30,028,281  | 0.016114 | 0.262 | 0.169 |           |       |  | <i>SCRN1</i>   | 5'UTR   |

|            |    |             |          |       |       |  |  |  |                  |         |
|------------|----|-------------|----------|-------|-------|--|--|--|------------------|---------|
| cg10754215 | 4  | 8,073,804   | 0.016033 | 0.262 | 0.215 |  |  |  | <i>ABLIM2</i>    | Body    |
| cg12441066 | 17 | 55,456,535  | 1.43E-13 | 0.262 | 0.239 |  |  |  | <i>MSI2</i>      | Body    |
| cg07522516 | 4  | 48,492,196  | 0.001871 | 0.262 | 0.295 |  |  |  | <i>ZAR1</i>      | TSS200  |
| cg08774871 | 16 | 85,783,575  | 3.2E-13  | 0.262 | 0.229 |  |  |  | <i>C16orf74</i>  | 5'UTR   |
| cg15415452 | 13 | 112,759,355 | 0.021333 | 0.262 | 0.306 |  |  |  |                  |         |
| cg26253898 | 2  | 163,006,202 | 1.6E-09  | 0.262 | 0.197 |  |  |  | <i>GCG</i>       | 5'UTR   |
| cg01062395 | 6  | 29,855,636  | 0.005724 | 0.262 | 0.230 |  |  |  | <i>HLA-H</i>     | Body    |
| cg17640147 | 8  | 142,302,237 | 3.36E-22 | 0.262 | 0.263 |  |  |  |                  |         |
| cg02855833 | 8  | 12,293,509  | 0.010032 | 0.262 | 0.179 |  |  |  | <i>FAM86B2</i>   | Body    |
| cg11145461 | 1  | 201,475,451 | 3.83E-05 | 0.262 | 0.276 |  |  |  | <i>CSRP1</i>     | 5'UTR   |
| cg11213369 | 7  | 1,270,925   | 1.41E-14 | 0.262 | 0.257 |  |  |  |                  |         |
| cg14659346 | 2  | 233,246,431 | 0.017341 | 0.262 | 0.220 |  |  |  | <i>ALPP</i>      | Body    |
| cg25807487 | 11 | 68,782,106  | 4.53E-09 | 0.262 | 0.271 |  |  |  | <i>MRGPRF</i>    | TSS1500 |
| cg15916192 | 12 | 63,025,948  | 0.018553 | 0.262 | 0.215 |  |  |  |                  |         |
| cg14852394 | 2  | 67,116,039  | 5.7E-12  | 0.262 | 0.244 |  |  |  |                  |         |
| cg25979543 | 1  | 17,888,104  | 6.47E-20 | 0.262 | 0.258 |  |  |  | <i>ARHGEF10L</i> | 5'UTR   |
| cg24303731 | 7  | 14,942,359  | 0.003121 | 0.262 | 0.322 |  |  |  |                  |         |
| cg10975889 | 1  | 221,057,808 | 4.81E-11 | 0.262 | 0.236 |  |  |  | <i>HLX</i>       | Body    |
| cg03719509 | 5  | 77,945,178  | 0.031512 | 0.262 | 0.188 |  |  |  | <i>LHFPL2</i>    | TSS1500 |
| cg21619653 | 2  | 45,163,188  | 0.004679 | 0.262 | 0.362 |  |  |  |                  |         |
| cg16849024 | 19 | 41,934,210  | 6.33E-76 | 0.262 | 0.254 |  |  |  | <i>B3GNT8</i>    | 5'UTR   |
| cg18415686 | 14 | 36,005,164  | 2.24E-14 | 0.262 | 0.243 |  |  |  | <i>INSM2</i>     | 3'UTR   |
| cg25302087 | 6  | 21,668,049  | 7.37E-10 | 0.262 | 0.294 |  |  |  | <i>FLJ22536</i>  | Body    |
| cg04233193 | 16 | 1,340,362   | 1.28E-06 | 0.262 | 0.244 |  |  |  |                  |         |
| cg01807688 | X  | 133,680,740 | 0.020433 | 0.262 | 0.242 |  |  |  | <i>MGC16121</i>  | TSS200  |
| cg16220788 | 11 | 46,005,268  | 9.4E-21  | 0.262 | 0.259 |  |  |  | <i>PHF21A</i>    | Body    |
| cg19580937 | 15 | 70,740,429  | 1.09E-15 | 0.262 | 0.245 |  |  |  |                  |         |
| cg18500988 | 4  | 54,959,708  | 1.76E-12 | 0.262 | 0.238 |  |  |  |                  |         |
| cg02400740 | 7  | 19,157,938  | 0.012836 | 0.262 | 0.254 |  |  |  | <i>TWIST1</i>    | TSS1500 |
| cg05822633 | 20 | 11,898,531  | 0.022507 | 0.262 | 0.069 |  |  |  | <i>BTBD3</i>     | 5'UTR   |
| cg08594554 | 17 | 72,231,318  | 5.57E-09 | 0.262 | 0.254 |  |  |  | <i>TTYH2</i>     | Body    |
| cg11504517 | 1  | 3,569,899   | 6.21E-10 | 0.262 | 0.245 |  |  |  | <i>TP73</i>      | 5'UTR   |
| cg02508651 | 17 | 46,604,554  | 2.25E-05 | 0.262 | 0.214 |  |  |  |                  |         |
| cg02320740 | 10 | 106,400,259 | 0.03822  | 0.262 | 0.194 |  |  |  | <i>SORCS3</i>    | TSS1500 |

|            |    |             |          |       |       |  |  |  |                  |         |
|------------|----|-------------|----------|-------|-------|--|--|--|------------------|---------|
| cg26940479 | 16 | 85,201,840  | 1.01E-05 | 0.262 | 0.205 |  |  |  |                  |         |
| cg05638493 | 5  | 140,683,367 | 3.15E-05 | 0.262 | 0.233 |  |  |  | <i>SLC25A2</i>   | 1stExon |
| cg02892388 | 7  | 155,260,310 | 0.000653 | 0.262 | 0.255 |  |  |  |                  |         |
| cg09671955 | 1  | 169,429,972 | 4.58E-10 | 0.262 | 0.267 |  |  |  |                  |         |
| cg20652899 | 11 | 117,747,940 | 4.6E-17  | 0.262 | 0.253 |  |  |  | <i>FXVD6</i>     | 5'UTR   |
| cg20664636 | 17 | 1,959,596   | 1.22E-07 | 0.262 | 0.257 |  |  |  | <i>HIC1</i>      | TSS200  |
| cg20019985 | 11 | 32,008,961  | 0.00171  | 0.262 | 0.310 |  |  |  |                  |         |
| cg11668419 | 1  | 68,025,026  | 2.87E-06 | 0.262 | 0.250 |  |  |  |                  |         |
| cg18926409 | 15 | 65,174,571  | 1.32E-17 | 0.262 | 0.251 |  |  |  |                  |         |
| cg02473781 | 22 | 22,007,095  | 1.46E-33 | 0.262 | 0.238 |  |  |  | <i>MIR130B</i>   | TSS1500 |
| cg20849109 | 8  | 1,954,777   | 5.27E-06 | 0.262 | 0.283 |  |  |  | <i>KBTD11</i>    | 3'UTR   |
| cg14846965 | 18 | 13,611,481  | 2.99E-05 | 0.262 | 0.241 |  |  |  | <i>C18orf1</i>   | TSS200  |
| cg27191312 | 19 | 12,750,958  | 0.004851 | 0.262 | 0.229 |  |  |  |                  |         |
| cg05961809 | 4  | 154,710,523 | 0.003131 | 0.262 | 0.340 |  |  |  | <i>SFRP2</i>     | TSS1500 |
| cg15608939 | 17 | 8,907,074   | 0.000274 | 0.262 | 0.236 |  |  |  |                  |         |
| cg16073143 | 6  | 159,360,073 | 2.25E-07 | 0.262 | 0.269 |  |  |  |                  |         |
| cg21011139 | 11 | 7,695,245   | 1.16E-07 | 0.262 | 0.234 |  |  |  | <i>CYB5R2</i>    | TSS1500 |
| cg19942459 | 11 | 70,508,110  | 1.41E-06 | 0.262 | 0.242 |  |  |  | <i>SHANK2</i>    | Body    |
| cg22745354 | 2  | 928,720     | 7.24E-19 | 0.262 | 0.240 |  |  |  |                  |         |
| cg20980783 | 8  | 67,874,178  | 0.002331 | 0.262 | 0.155 |  |  |  |                  |         |
| cg11159604 | 1  | 91,316,223  | 2.42E-05 | 0.262 | 0.221 |  |  |  |                  |         |
| cg16239482 | 3  | 181,437,145 | 0.034991 | 0.262 | 0.330 |  |  |  | <i>SOX2OT</i>    | Body    |
| cg02751808 | 2  | 71,125,521  | 4.41E-05 | 0.262 | 0.290 |  |  |  |                  |         |
| cg08128274 | 1  | 206,832,043 | 6.14E-05 | 0.262 | 0.262 |  |  |  |                  |         |
| cg11746813 | 12 | 54,448,090  | 3.83E-07 | 0.262 | 0.245 |  |  |  | <i>HOXC4</i>     | 1stExon |
| cg26053073 | 8  | 131,455,383 | 0.01909  | 0.262 | 0.133 |  |  |  |                  |         |
| cg15454486 | 2  | 192,543,810 | 0.032971 | 0.262 | 0.162 |  |  |  | <i>OBFC2A</i>    | Body    |
| cg20939723 | 2  | 171,570,700 | 7.34E-05 | 0.262 | 0.213 |  |  |  | <i>LOC440925</i> | Body    |
| cg22894896 | 17 | 29,886,890  | 0.001702 | 0.262 | 0.323 |  |  |  | <i>MIR193A</i>   | TSS200  |
| cg04099705 | 16 | 1,397,981   | 4.5E-08  | 0.262 | 0.254 |  |  |  | <i>BAIAP3</i>    | Body    |
| cg06215569 | 1  | 110,611,465 | 0.001916 | 0.262 | 0.327 |  |  |  | <i>ALX3</i>      | Body    |
| cg26595643 | 10 | 118,899,291 | 7.26E-06 | 0.262 | 0.238 |  |  |  | <i>VAX1</i>      | TSS1500 |
| cg09569850 | 2  | 64,955,034  | 2.33E-09 | 0.262 | 0.304 |  |  |  |                  |         |
| cg13537237 | 2  | 241,908,681 | 2.41E-08 | 0.262 | 0.247 |  |  |  |                  |         |

|            |    |             |          |       |       |          |       |     |                 |         |
|------------|----|-------------|----------|-------|-------|----------|-------|-----|-----------------|---------|
| cg16604035 | 1  | 27,863,299  | 3.98E-12 | 0.262 | 0.234 |          |       |     | <i>AHDC1</i>    | 3'UTR   |
| cg19599386 | 2  | 113,420,964 | 3.17E-09 | 0.262 | 0.272 |          |       |     | <i>SLC20A1</i>  | 3'UTR   |
| cg01876531 | 1  | 208,405,868 | 3.16E-07 | 0.262 | 0.261 |          |       |     | <i>PLXNA2</i>   | 5'UTR   |
| cg09581649 | 16 | 4,572,735   | 2.33E-22 | 0.262 | 0.251 |          |       |     | <i>C16orf5</i>  | 5'UTR   |
| cg25839877 | 17 | 76,361,930  | 6.2E-13  | 0.262 | 0.257 |          |       |     |                 |         |
| cg17059658 | 18 | 905,101     | 0.019391 | 0.262 | 0.275 |          |       |     | <i>ADCYAP1</i>  | 5'UTR   |
| cg14353137 | 8  | 67,873,799  | 0.039238 | 0.262 | 0.187 |          |       |     |                 |         |
| cg03075709 | 5  | 2,755,820   | 0.003895 | 0.262 | 0.299 |          |       |     |                 |         |
| cg25947408 | 5  | 133,451,383 | 9.69E-16 | 0.262 | 0.237 |          |       |     | <i>TCF7</i>     | 5'UTR   |
| cg13510327 | 6  | 31,830,729  | 0.047206 | 0.262 | 0.244 |          |       |     | <i>NEU1</i>     | TSS200  |
| cg10635122 | 19 | 52,391,090  | 0.011424 | 0.262 | 0.258 |          |       |     | <i>ZNF577</i>   | Body    |
| cg15746187 | 1  | 11,713,123  | 1.44E-09 | 0.262 | 0.240 |          |       |     | <i>FBXO2</i>    | Body    |
| cg20378690 | 8  | 22,723,551  | 6.09E-08 | 0.262 | 0.196 |          |       | Yes | <i>PEBP4</i>    | Body    |
| cg18417373 | 6  | 32,077,097  | 8.39E-06 | 0.262 | 0.233 |          |       |     | <i>TNXB</i>     | 5'UTR   |
| cg20406267 | 11 | 34,377,921  | 0.0049   | 0.262 | 0.219 |          |       |     | <i>ABTB2</i>    | Body    |
| cg04363624 | 1  | 47,697,965  | 0.000138 | 0.262 | 0.246 |          |       |     |                 |         |
| cg24343310 | 11 | 57,249,947  | 2.86E-23 | 0.262 | 0.272 |          |       |     |                 |         |
| cg03989068 | 2  | 42,106,106  | 2.76E-13 | 0.262 | 0.238 |          |       |     |                 |         |
| cg22488367 | 22 | 45,608,448  | 0.003236 | 0.262 | 0.269 |          |       |     | <i>C22orf9</i>  | Body    |
| cg10880485 | 14 | 60,974,384  | 3.18E-06 | 0.262 | 0.238 |          |       |     |                 |         |
| cg27154163 | 4  | 55,523,756  | 2.49E-05 | 0.262 | 0.174 | 8.67E-22 | 0.196 |     | <i>KIT</i>      | TSS1500 |
| cg06879222 | 16 | 85,730,838  | 8.73E-08 | 0.262 | 0.224 |          |       |     |                 |         |
| cg01996567 | 7  | 149,484,880 | 0.002242 | 0.262 | 0.215 |          |       |     | <i>SSPO</i>     | Body    |
| cg08045906 | 6  | 32,120,625  | 9.14E-05 | 0.262 | 0.287 |          |       |     | <i>PPT2</i>     | TSS1500 |
| cg12061069 | 17 | 2,755,793   | 6.98E-12 | 0.262 | 0.237 |          |       |     | <i>RAP1GAP2</i> | Body    |
| cg16852440 | 2  | 237,570,117 | 3.64E-08 | 0.262 | 0.247 |          |       |     |                 |         |
| cg01467266 | 19 | 2,252,961   | 7.3E-16  | 0.261 | 0.271 |          |       |     | <i>JSRP1</i>    | Body    |
| cg11697427 | 10 | 102,590,168 | 1.32E-06 | 0.261 | 0.275 |          |       |     |                 |         |
| cg26142412 | 11 | 20,185,077  | 0.036339 | 0.261 | 0.282 |          |       |     |                 |         |
| cg14595252 | 18 | 9,709,061   | 9.37E-06 | 0.261 | 0.164 |          |       |     | <i>RAB31</i>    | Body    |
| cg16561893 | 6  | 85,483,536  | 0.003991 | 0.261 | 0.253 |          |       |     |                 |         |
| cg00076538 | 5  | 38,257,555  | 7.98E-11 | 0.261 | 0.250 |          |       |     | <i>EGFLAM</i>   | TSS1500 |
| cg22861561 | 12 | 48,397,730  | 0.001398 | 0.261 | 0.166 |          |       |     | <i>COL2A1</i>   | Body    |
| cg24114154 | 17 | 46,655,829  | 0.00771  | 0.261 | 0.252 |          |       |     | <i>HOXB4</i>    | TSS200  |

|            |    |             |          |       |       |          |       |     |                     |         |
|------------|----|-------------|----------|-------|-------|----------|-------|-----|---------------------|---------|
| cg20064106 | 2  | 178,257,871 | 0.001862 | 0.261 | 0.177 |          |       |     | <i>LOC100130691</i> | TSS1500 |
| cg03761750 | 12 | 6,184,355   | 1.54E-06 | 0.261 | 0.262 |          |       |     | <i>VWF</i>          | Body    |
| cg08510658 | 6  | 10,882,927  | 5.75E-05 | 0.261 | 0.277 |          |       |     | <i>GCM2</i>         | TSS1500 |
| cg08641579 | 7  | 79,083,447  | 0.000647 | 0.261 | 0.190 |          |       |     | <i>MAGI2</i>        | TSS1500 |
| cg18390345 | 10 | 98,939,912  | 2.69E-16 | 0.261 | 0.252 |          |       |     | <i>SLIT1</i>        | Body    |
| cg00332680 | 10 | 74,079,303  | 0.027918 | 0.261 | 0.187 |          |       |     |                     |         |
| cg25158320 | 17 | 1,665,262   | 3.08E-08 | 0.261 | 0.279 |          |       |     | <i>SERPINF1</i>     | 1stExon |
| cg04163638 | 2  | 16,832,247  | 8.81E-07 | 0.261 | 0.277 |          |       |     | <i>FAM49A</i>       | 5'UTR   |
| cg02337898 | 12 | 93,578,655  | 2.38E-09 | 0.261 | 0.242 |          |       |     |                     |         |
| cg04036070 | 16 | 53,957,219  | 1.66E-06 | 0.261 | 0.268 |          |       |     | <i>FTO</i>          | Body    |
| cg08555612 | 3  | 71,834,640  | 0.000192 | 0.261 | 0.210 | 2.97E-25 | 0.226 |     | <i>PROK2</i>        | TSS1500 |
| cg10366178 | 3  | 13,323,866  | 1.45E-06 | 0.261 | 0.265 |          |       |     |                     |         |
| cg26334154 | 3  | 42,132,310  | 5.03E-10 | 0.261 | 0.195 |          |       |     | <i>TRAK1</i>        | TSS1500 |
| cg08218734 | 10 | 128,993,810 | 0.017714 | 0.261 | 0.178 |          |       |     | <i>FAM196A</i>      | 5'UTR   |
| cg08275025 | 11 | 314,493     | 0.000681 | 0.261 | 0.128 |          |       |     | <i>IFITM1</i>       | Body    |
| cg08799997 | 6  | 167,737,937 | 5.63E-10 | 0.261 | 0.240 |          |       |     | <i>TLL2</i>         | TSS1500 |
| cg19805748 | 17 | 71,003,041  | 3.06E-18 | 0.261 | 0.258 |          |       |     | <i>SLC39A11</i>     | Body    |
| cg19120717 | 6  | 41,343,647  | 1.77E-05 | 0.261 | 0.299 |          |       |     |                     |         |
| cg27541454 | 1  | 975,551     | 1.08E-06 | 0.261 | 0.253 |          |       |     | <i>AGRN</i>         | Body    |
| cg13580029 | 7  | 123,569,748 | 8.96E-12 | 0.261 | 0.236 |          |       | Yes | <i>SPAM1</i>        | 5'UTR   |
| cg15603568 | 11 | 105,481,283 | 0.009396 | 0.261 | 0.262 |          |       |     | <i>GRIA4</i>        | 5'UTR   |
| cg06636195 | 2  | 109,533,679 | 0.016547 | 0.261 | 0.250 |          |       |     | <i>EDAR</i>         | Body    |
| cg07846167 | 1  | 16,084,758  | 4.65E-05 | 0.261 | 0.295 |          |       |     | <i>FBLIM1</i>       | TSS1500 |
| cg21082028 | 17 | 46,659,993  | 2.22E-06 | 0.261 | 0.234 |          |       |     |                     |         |
| cg05224998 | 17 | 33,700,801  | 0.038367 | 0.261 | 0.362 |          |       |     | <i>SLFN11</i>       | TSS200  |
| cg01709518 | 3  | 68,053,484  | 0.002118 | 0.261 | 0.338 |          |       |     | <i>FAM19A1</i>      | 5'UTR   |
| cg03972560 | X  | 17,877,110  | 2.23E-11 | 0.261 | 0.272 |          |       |     | <i>RAI2</i>         | 5'UTR   |
| cg21821214 | 2  | 176,969,223 | 0.001081 | 0.261 | 0.293 |          |       |     |                     |         |
| cg19885926 | X  | 71,350,942  | 1.75E-08 | 0.261 | 0.249 |          |       |     | <i>NHSL2</i>        | Body    |
| cg20605818 | 10 | 72,166,322  | 3.74E-12 | 0.261 | 0.241 |          |       |     | <i>EIF4EBP2</i>     | Body    |
| cg10263682 | 3  | 181,413,847 | 0.028081 | 0.261 | 0.261 |          |       |     | <i>SOX2OT</i>       | Body    |
| cg02711872 | 7  | 150,652,702 | 1.88E-17 | 0.261 | 0.270 |          |       |     | <i>KCNH2</i>        | 5'UTR   |
| cg08748913 | 5  | 137,071,788 | 4.04E-07 | 0.261 | 0.126 |          |       |     | <i>KLHL3</i>        | TSS200  |
| cg22705959 | 2  | 208,635,887 | 7.07E-09 | 0.261 | 0.257 |          |       |     |                     |         |

|            |    |             |          |       |       |          |       |  |                  |         |
|------------|----|-------------|----------|-------|-------|----------|-------|--|------------------|---------|
| cg23261919 | 10 | 135,072,960 | 5.64E-08 | 0.261 | 0.239 |          |       |  |                  |         |
| cg04848693 | 7  | 2,078,786   | 3.57E-19 | 0.261 | 0.214 |          |       |  | <i>MAD1L1</i>    | Body    |
| cg01619345 | 9  | 4,297,433   | 0.00051  | 0.261 | 0.203 |          |       |  | <i>GLIS3</i>     | 5'UTR   |
| cg02078525 | 16 | 66,400,395  | 3.16E-07 | 0.261 | 0.201 |          |       |  | <i>CDH5</i>      | TSS200  |
| cg00157796 | 6  | 159,590,231 | 0.040363 | 0.261 | 0.199 |          |       |  | <i>FNDC1</i>     | TSS200  |
| cg04792863 | 1  | 110,627,197 | 4.16E-06 | 0.261 | 0.246 |          |       |  |                  |         |
| cg08566455 | 2  | 130,971,164 | 0.040803 | 0.261 | 0.212 |          |       |  |                  |         |
| cg09437808 | 5  | 176,107,069 | 1.26E-07 | 0.261 | 0.311 |          |       |  |                  |         |
| cg23334662 | 2  | 198,540,518 | 7.85E-11 | 0.261 | 0.271 |          |       |  | <i>RFTN2</i>     | 1stExon |
| cg05301383 | 2  | 171,569,144 | 1.01E-05 | 0.261 | 0.245 |          |       |  | <i>LOC440925</i> | Body    |
| cg23588462 | 13 | 95,357,223  | 2.5E-06  | 0.261 | 0.260 |          |       |  |                  |         |
| cg27221193 | 20 | 62,466,924  | 1.71E-17 | 0.261 | 0.265 |          |       |  |                  |         |
| cg07298473 | 11 | 47,279,183  | 1.39E-05 | 0.261 | 0.221 |          |       |  | <i>NR1H3</i>     | 5'UTR   |
| cg24409539 | 2  | 114,034,595 | 1.23E-06 | 0.261 | 0.299 |          |       |  | <i>PAX8</i>      | Body    |
| cg09775263 | 6  | 10,884,094  | 7.2E-05  | 0.261 | 0.248 |          |       |  |                  |         |
| cg10772304 | 3  | 179,245,127 | 3.66E-07 | 0.261 | 0.290 |          |       |  |                  |         |
| cg24049493 | 1  | 42,385,941  | 6.53E-06 | 0.261 | 0.251 |          |       |  | <i>HIVEP3</i>    | TSS1500 |
| cg12118013 | 3  | 134,031,948 | 6.1E-08  | 0.261 | 0.249 |          |       |  |                  |         |
| cg15270892 | 3  | 27,762,352  | 0.002055 | 0.261 | 0.089 |          |       |  | <i>EOMES</i>     | Body    |
| cg03109913 | 1  | 94,445,292  | 1.2E-06  | 0.261 | 0.213 |          |       |  |                  |         |
| cg04486382 | 17 | 55,483,894  | 3.88E-06 | 0.261 | 0.222 |          |       |  | <i>MSI2</i>      | Body    |
| cg06401021 | 6  | 55,443,868  | 0.027554 | 0.261 | 0.295 |          |       |  | <i>HMGCLL1</i>   | 1stExon |
| cg02881929 | 4  | 41,882,868  | 4.14E-07 | 0.261 | 0.238 |          |       |  |                  |         |
| cg08359956 | 7  | 150,498,205 | 1.13E-08 | 0.261 | 0.265 | 2.86E-36 | 0.252 |  | <i>TMEM176B</i>  | 1stExon |
| cg02624701 | 19 | 49,937,176  | 0.021811 | 0.261 | 0.298 |          |       |  | <i>SLC17A7</i>   | Body    |
| cg07451524 | 10 | 123,923,518 | 3.77E-10 | 0.261 | 0.252 |          |       |  | <i>TACC2</i>     | Body    |
| cg25101405 | 1  | 1,398,028   | 5.71E-23 | 0.261 | 0.261 |          |       |  | <i>ATAD3C</i>    | Body    |
| cg05966228 | 16 | 67,666,442  | 2.13E-11 | 0.261 | 0.230 |          |       |  | <i>CTCF</i>      | Body    |
| cg10619129 | 6  | 33,085,755  | 4.39E-06 | 0.261 | 0.259 |          |       |  | <i>HLA-DPB2</i>  | Body    |
| cg14254720 | 1  | 90,097,981  | 0.008388 | 0.261 | 0.224 |          |       |  | <i>LRR8C</i>     | TSS1500 |
| cg01257171 | 5  | 172,656,713 | 0.001214 | 0.261 | 0.359 |          |       |  |                  |         |
| cg24421668 | 5  | 179,244,452 | 0.00019  | 0.261 | 0.201 |          |       |  | <i>SQSTM1</i>    | 5'UTR   |
| cg26606327 | 7  | 98,972,104  | 0.004866 | 0.261 | 0.192 |          |       |  | <i>ARPC1B</i>    | TSS1500 |
| cg14315444 | 17 | 48,636,344  | 4E-07    | 0.261 | 0.257 |          |       |  |                  |         |



|            |    |             |          |       |       |          |       |  |              |         |
|------------|----|-------------|----------|-------|-------|----------|-------|--|--------------|---------|
| cg15837212 | 1  | 63,795,970  | 2.28E-06 | 0.261 | 0.272 |          |       |  |              |         |
| cg06277657 | 7  | 137,532,374 | 1.83E-05 | 0.261 | 0.223 | 3.4E-22  | 0.253 |  | DGKI         | TSS1500 |
| cg25053018 | 2  | 173,477,995 | 1.44E-10 | 0.261 | 0.243 |          |       |  |              |         |
| cg27173151 | 1  | 203,598,330 | 0.000167 | 0.261 | 0.258 |          |       |  | ATP2B4       | 5'UTR   |
| cg08763617 | 6  | 138,183,963 | 1.51E-06 | 0.261 | 0.235 |          |       |  |              |         |
| cg20186067 | 7  | 129,422,439 | 1.83E-05 | 0.261 | 0.264 |          |       |  |              |         |
| cg25734421 | 1  | 210,501,368 | 6.61E-14 | 0.261 | 0.273 |          |       |  | HHAT         | TSS1500 |
| cg21282282 | 1  | 109,705,170 | 1.15E-12 | 0.261 | 0.246 |          |       |  | KIAA1324     | Body    |
| cg02707176 | 5  | 140,798,758 | 0.000184 | 0.261 | 0.304 |          |       |  | PCDHGA4      | Body    |
| cg17021218 | 10 | 88,731,069  | 0.019223 | 0.261 | 0.224 |          |       |  | AGAP11       | 5'UTR   |
| cg23740491 | 6  | 27,228,267  | 0.000376 | 0.261 | 0.298 |          |       |  |              |         |
| cg00421624 | 1  | 153,746,588 | 2.3E-08  | 0.261 | 0.275 |          |       |  | SLC27A3      | TSS1500 |
| cg11741189 | 11 | 31,843,886  | 0.000213 | 0.261 | 0.253 |          |       |  |              |         |
| cg18089397 | 4  | 2,264,747   | 0.006583 | 0.261 | 0.177 |          |       |  | MXD4         | TSS1500 |
| cg21366688 | 6  | 134,491,421 | 1.03E-13 | 0.261 | 0.271 |          |       |  | SGK1         | Body    |
| cg24537836 | 12 | 51,782,159  | 1.28E-09 | 0.261 | 0.277 |          |       |  | GALNT6       | 5'UTR   |
| cg02844545 | 6  | 10,882,043  | 4.25E-11 | 0.261 | 0.235 | 4.37E-19 | 0.212 |  | GCM2         | 1stExon |
| cg03305185 | X  | 134,429,653 | 3.97E-05 | 0.261 | 0.233 |          |       |  | ZNF75D       | 5'UTR   |
| cg16055869 | 4  | 74,864,612  | 6.22E-07 | 0.261 | 0.249 |          |       |  | CXCL5        | TSS200  |
| cg05157360 | 13 | 113,613,660 | 0.004378 | 0.261 | 0.174 |          |       |  |              |         |
| cg09321400 | 16 | 55,690,443  | 0.000704 | 0.261 | 0.203 |          |       |  | SLC6A2       | TSS200  |
| cg17125267 | 4  | 115,520,931 | 3.03E-05 | 0.261 | 0.281 |          |       |  | UGT8         | 5'UTR   |
| cg26827247 | 11 | 93,063,208  | 0.003096 | 0.261 | 0.167 |          |       |  | CCDC67       | TSS1500 |
| cg04086468 | 3  | 185,911,208 | 9.41E-06 | 0.261 | 0.207 |          |       |  | DGKG         | Body    |
| cg22292345 | 3  | 47,051,533  | 2.98E-14 | 0.261 | 0.232 |          |       |  | LOC100129354 | TSS1500 |
| cg25965471 | 6  | 43,211,235  | 0.005105 | 0.261 | 0.263 |          |       |  | TTBK1        | 5'UTR   |
| cg25579180 | 7  | 71,098,623  | 0.007536 | 0.261 | 0.245 |          |       |  | WBSCR17      | Body    |
| cg13173111 | 17 | 66,255,265  | 0.000835 | 0.261 | 0.272 |          |       |  | ARSG         | TSS200  |
| cg03730533 | 7  | 26,897,685  | 7.22E-06 | 0.261 | 0.273 |          |       |  | SKAP2        | Body    |
| cg22659049 | 4  | 41,646,672  | 1.07E-15 | 0.261 | 0.264 |          |       |  | LIMCH1       | Body    |
| cg03688699 | 11 | 62,694,712  | 3.05E-09 | 0.261 | 0.262 |          |       |  |              |         |
| cg22799132 | X  | 111,325,495 | 6.21E-06 | 0.261 | 0.262 | 3.7E-14  | 0.191 |  | TRPC5        | 5'UTR   |
| cg02274869 | 19 | 11,784,955  | 3.91E-06 | 0.261 | 0.206 |          |       |  | ZNF833       | Body    |
| cg09481483 | 16 | 11,734,383  | 5.65E-08 | 0.261 | 0.281 |          |       |  |              |         |

|            |    |             |          |       |       |          |       |  |                 |         |
|------------|----|-------------|----------|-------|-------|----------|-------|--|-----------------|---------|
| cg18678645 | 5  | 135,416,331 | 5.76E-05 | 0.261 | 0.217 |          |       |  | <i>MIR886</i>   | TSS200  |
| cg03184366 | X  | 9,984,977   | 0.005788 | 0.261 | 0.286 |          |       |  | <i>WWC3</i>     | 5'UTR   |
| cg18944451 | 2  | 177,023,716 | 0.005768 | 0.261 | 0.283 |          |       |  |                 |         |
| cg02487331 | 1  | 146,550,467 | 7.45E-09 | 0.261 | 0.285 |          |       |  |                 |         |
| cg26147098 | 8  | 145,103,393 | 8.86E-06 | 0.261 | 0.266 |          |       |  |                 |         |
| cg12752627 | 10 | 94,827,528  | 9.71E-17 | 0.261 | 0.257 |          |       |  | <i>CYP26C1</i>  | Body    |
| cg24435924 | 19 | 12,978,255  | 0.00096  | 0.261 | 0.281 |          |       |  | <i>MAST1</i>    | Body    |
| cg00783104 | 8  | 41,655,894  | 0.000149 | 0.261 | 0.278 |          |       |  | <i>ANK1</i>     | TSS1500 |
| cg05732750 | 7  | 6,704,045   | 7.5E-14  | 0.261 | 0.229 |          |       |  |                 |         |
| cg21253721 | 17 | 1,202,092   | 0.002371 | 0.261 | 0.267 |          |       |  | <i>TUSC5</i>    | 3'UTR   |
| cg06390536 | 17 | 73,584,068  | 0.001538 | 0.261 | 0.213 |          |       |  | <i>MYO15B</i>   | TSS200  |
| cg26874367 | 2  | 129,381,792 | 6.09E-09 | 0.261 | 0.262 |          |       |  |                 |         |
| cg11255159 | 19 | 18,401,021  | 1.86E-06 | 0.261 | 0.264 |          |       |  |                 |         |
| cg15898874 | 15 | 96,515,411  | 2.75E-08 | 0.261 | 0.246 |          |       |  |                 |         |
| cg15374686 | 1  | 110,694,263 | 3.1E-12  | 0.260 | 0.246 |          |       |  | <i>SLC6A17</i>  | 5'UTR   |
| cg22402007 | 9  | 87,282,823  | 0.002678 | 0.260 | 0.138 | 3.29E-16 | 0.133 |  | <i>NTRK2</i>    | TSS1500 |
| cg27214960 | 10 | 135,343,280 | 0.007184 | 0.260 | 0.190 |          |       |  | <i>CYP2E1</i>   | Body    |
| cg00543976 | 1  | 112,058,750 | 2.2E-08  | 0.260 | 0.234 |          |       |  | <i>ADORA3</i>   | Body    |
| cg02839824 | X  | 119,133,091 | 0.021045 | 0.260 | 0.268 |          |       |  |                 |         |
| cg19641804 | 12 | 54,653,065  | 8.08E-17 | 0.260 | 0.253 |          |       |  | <i>CBX5</i>     | 1stExon |
| cg03116258 | 7  | 27,135,214  | 4.98E-14 | 0.260 | 0.226 |          |       |  | <i>HOXA1</i>    | 1stExon |
| cg06170215 | X  | 71,525,152  | 0.001798 | 0.260 | 0.161 |          |       |  | <i>CITED1</i>   | 5'UTR   |
| cg13922451 | 6  | 28,557,542  | 0.001685 | 0.260 | 0.222 |          |       |  |                 |         |
| cg14722140 | 6  | 49,518,627  | 0.007922 | 0.260 | 0.244 |          |       |  | <i>C6orf141</i> | 1stExon |
| cg22709192 | 12 | 54,366,909  | 0.000307 | 0.260 | 0.240 | 2.83E-17 | 0.196 |  | <i>HOXC11</i>   | 5'UTR   |
| cg11752430 | 10 | 79,273,606  | 9.34E-15 | 0.260 | 0.256 |          |       |  | <i>KCNMA1</i>   | Body    |
| cg01275038 | 4  | 7,287,492   | 0.001851 | 0.260 | 0.260 |          |       |  | <i>SORCS2</i>   | Body    |
| cg06204126 | 9  | 139,890,188 | 5.27E-21 | 0.260 | 0.238 |          |       |  | <i>CLIC3</i>    | Body    |
| cg15812322 | 11 | 45,868,398  | 1.9E-08  | 0.260 | 0.189 |          |       |  | <i>CRY2</i>     | TSS1500 |
| cg25554917 | 2  | 170,220,129 | 0.016586 | 0.260 | 0.253 |          |       |  | <i>LRP2</i>     | TSS1500 |
| cg02351655 | 16 | 4,442,918   | 1.29E-15 | 0.260 | 0.266 |          |       |  | <i>CORO7</i>    | Body    |
| cg02428792 | 4  | 25,090,597  | 0.003034 | 0.260 | 0.205 |          |       |  |                 |         |
| cg06395298 | 17 | 46,651,225  | 0.002116 | 0.260 | 0.227 |          |       |  | <i>HOXB3</i>    | 5'UTR   |
| cg15840462 | 1  | 969,744     | 2.08E-11 | 0.260 | 0.264 |          |       |  | <i>AGRN</i>     | Body    |

|            |    |             |          |       |       |            |       |  |                  |         |
|------------|----|-------------|----------|-------|-------|------------|-------|--|------------------|---------|
| cg15772924 | 12 | 54,413,384  | 2.69E-09 | 0.260 | 0.242 |            |       |  | <i>HOXC4</i>     | 5'UTR   |
| cg17657037 | 19 | 3,933,856   | 0.003663 | 0.260 | 0.367 |            |       |  | <i>ITGB1BP3</i>  | Body    |
| cg25171348 | 7  | 28,448,200  | 6.53E-09 | 0.260 | 0.233 |            |       |  | <i>CREB5</i>     | 5'UTR   |
| cg04821993 | 7  | 73,002,468  | 1.04E-06 | 0.260 | 0.221 |            |       |  |                  |         |
| cg11729934 | 6  | 1,601,693   | 1.54E-06 | 0.260 | 0.202 |            |       |  |                  |         |
| cg14643586 | 9  | 95,569,618  | 9.49E-06 | 0.260 | 0.234 |            |       |  |                  |         |
| cg26354128 | 14 | 93,897,195  | 0.012213 | 0.260 | 0.243 |            |       |  | <i>KIAA1409</i>  | 5'UTR   |
| cg06680397 | 5  | 135,527,376 | 1.21E-07 | 0.260 | 0.184 |            |       |  | <i>LOC389332</i> | Body    |
| cg08669096 | 11 | 121,229,765 | 1.03E-05 | 0.260 | 0.248 |            |       |  |                  |         |
| cg09249588 | 12 | 58,986,386  | 5.52E-10 | 0.260 | 0.283 |            |       |  |                  |         |
| cg00447970 | 17 | 29,719,431  | 1.02E-09 | 0.260 | 0.245 |            |       |  | <i>RAB11FIP4</i> | Body    |
| cg06678678 | 3  | 55,523,099  | 0.00754  | 0.260 | 0.190 |            |       |  |                  |         |
| cg17857974 | 5  | 140,800,474 | 8.78E-05 | 0.260 | 0.299 |            |       |  | <i>PCDHGA4</i>   | Body    |
| cg08021564 | 10 | 73,847,318  | 5.62E-06 | 0.260 | 0.282 |            |       |  | <i>SPOCK2</i>    | Body    |
| cg18566594 | 12 | 4,381,435   | 7.03E-06 | 0.260 | 0.256 |            |       |  | <i>CCND2</i>     | TSS1500 |
| cg10806146 | 8  | 42,356,871  | 2.35E-11 | 0.260 | 0.260 |            |       |  | <i>SLC20A2</i>   | 5'UTR   |
| cg03036592 | 10 | 101,287,839 | 0.002291 | 0.260 | 0.297 |            |       |  |                  |         |
| cg02483661 | 1  | 2,460,621   | 1.77E-06 | 0.260 | 0.270 |            |       |  | <i>HES5</i>      | 3'UTR   |
| cg15887459 | 11 | 18,230,903  | 1.22E-07 | 0.260 | 0.279 |            |       |  | <i>LOC494141</i> | Body    |
| cg17737014 | X  | 70,323,912  | 1.13E-06 | 0.260 | 0.284 |            |       |  | <i>CXorf65</i>   | Body    |
| cg25356719 | 10 | 1,638,893   | 1.52E-05 | 0.260 | 0.202 |            |       |  | <i>ADARB2</i>    | Body    |
| cg17846334 | 20 | 49,639,134  | 0.010439 | 0.260 | 0.151 |            |       |  | <i>KCNG1</i>     | 5'UTR   |
| cg06620896 | 15 | 37,395,115  | 0.049596 | 0.260 | 0.322 |            |       |  |                  |         |
| cg02888131 | 15 | 58,357,987  | 0.000612 | 0.260 | 0.295 |            |       |  | <i>ALDH1A2</i>   | TSS200  |
| cg06974930 | 1  | 46,633,153  | 1.82E-10 | 0.260 | 0.252 |            |       |  |                  |         |
| cg19866866 | 1  | 182,026,044 | 1.86E-07 | 0.260 | 0.272 |            |       |  | <i>ZNF648</i>    | Body    |
| cg12483476 | 5  | 178,421,711 | 0.031512 | 0.260 | 0.184 |            |       |  | <i>GRM6</i>      | 1stExon |
| cg09827833 | 9  | 27,109,492  | 5.58E-06 | 0.260 | 0.272 | 0.00036595 | 0.093 |  | <i>TEK</i>       | 5'UTR   |
| cg12378187 | 3  | 62,355,443  | 2.29E-05 | 0.260 | 0.269 |            |       |  | <i>FEZF2</i>     | 3'UTR   |
| cg22857085 | 4  | 85,403,223  | 9.72E-05 | 0.260 | 0.289 |            |       |  |                  |         |
| cg09288894 | 19 | 12,894,309  | 0.000224 | 0.260 | 0.177 |            |       |  |                  |         |
| cg21748207 | 2  | 26,395,359  | 9.13E-05 | 0.260 | 0.158 |            |       |  | <i>FAM59B</i>    | TSS1500 |
| cg18302606 | 19 | 39,904,402  | 0.012471 | 0.260 | 0.084 |            |       |  | <i>PLEKHG2</i>   | 5'UTR   |
| cg05021896 | 14 | 51,562,526  | 0.000341 | 0.260 | 0.174 |            |       |  | <i>TRIM9</i>     | TSS200  |

|            |    |             |          |       |       |          |       |     |                  |         |
|------------|----|-------------|----------|-------|-------|----------|-------|-----|------------------|---------|
| cg07642259 | X  | 43,833,130  | 0.003697 | 0.260 | 0.284 |          |       |     | <i>NDP</i>       | TSS1500 |
| cg11838224 | 17 | 7,287,740   | 0.000883 | 0.260 | 0.235 |          |       |     | <i>TNK1</i>      | Body    |
| cg01783662 | 3  | 181,442,676 | 1.86E-05 | 0.260 | 0.250 |          |       |     | <i>SOX2OT</i>    | Body    |
| cg26153410 | 12 | 103,358,619 | 0.000241 | 0.260 | 0.181 |          |       |     |                  |         |
| cg27554782 | 15 | 78,933,106  | 5.77E-08 | 0.260 | 0.196 | 6.85E-37 | 0.250 |     | <i>CHRNA4</i>    | Body    |
| cg08835221 | 22 | 38,071,607  | 8.79E-07 | 0.260 | 0.279 |          |       |     | <i>LGALS1</i>    | TSS200  |
| cg14186321 | 2  | 151,544,796 | 4.12E-13 | 0.260 | 0.210 |          |       | Yes |                  |         |
| cg15199678 | 7  | 96,642,510  | 3.83E-05 | 0.260 | 0.277 |          |       |     | <i>DLX6AS</i>    | Body    |
| cg17062109 | 17 | 46,670,029  | 6.04E-09 | 0.260 | 0.253 |          |       |     | <i>LOC404266</i> | Body    |
| cg17115250 | 6  | 28,557,291  | 0.001221 | 0.260 | 0.199 |          |       |     |                  |         |
| cg23704517 | 13 | 109,147,317 | 0.000202 | 0.260 | 0.130 |          |       |     |                  |         |
| cg18650716 | 6  | 30,711,863  | 0.000806 | 0.260 | 0.254 |          |       |     | <i>FLOT1</i>     | TSS1500 |
| cg14676825 | 17 | 27,038,886  | 0.000324 | 0.260 | 0.293 |          |       |     | <i>PROCA1</i>    | TSS200  |
| cg16163756 | 2  | 192,807,194 | 1.26E-16 | 0.260 | 0.249 |          |       |     |                  |         |
| cg17527404 | X  | 119,135,074 | 2.06E-07 | 0.260 | 0.262 |          |       |     |                  |         |
| cg21158502 | 5  | 74,348,187  | 1.93E-05 | 0.260 | 0.172 |          |       |     |                  |         |
| cg24398061 | 10 | 102,626,652 | 0.000611 | 0.260 | 0.322 |          |       |     |                  |         |
| cg27565450 | X  | 72,667,088  | 3.51E-05 | 0.260 | 0.175 |          |       |     | <i>CDX4</i>      | TSS200  |
| cg26788672 | 11 | 91,958,396  | 0.004611 | 0.260 | 0.280 |          |       |     |                  |         |
| cg01460436 | 20 | 44,687,454  | 4.13E-07 | 0.260 | 0.230 |          |       |     | <i>SLC12A5</i>   | 3'UTR   |
| cg04171235 | 17 | 46,604,393  | 3.1E-06  | 0.260 | 0.205 |          |       |     |                  |         |
| cg09127607 | 10 | 69,914,213  | 5.39E-05 | 0.260 | 0.259 |          |       |     | <i>MYPN</i>      | Body    |
| cg10204868 | 2  | 131,512,971 | 5.83E-06 | 0.260 | 0.269 |          |       |     | <i>FAM123C</i>   | TSS1500 |
| cg14772107 | X  | 23,350,419  | 0.002473 | 0.260 | 0.282 |          |       |     |                  |         |
| cg20062681 | 11 | 94,988,642  | 2.39E-05 | 0.260 | 0.238 |          |       |     |                  |         |
| cg19452802 | 6  | 46,459,961  | 0.006656 | 0.260 | 0.127 |          |       |     |                  |         |
| cg00123762 | 6  | 41,343,697  | 0.003779 | 0.260 | 0.286 |          |       |     |                  |         |
| cg13169011 | 14 | 60,973,462  | 0.000314 | 0.260 | 0.223 |          |       |     |                  |         |
| cg24059115 | 7  | 134,143,489 | 0.021456 | 0.260 | 0.233 |          |       |     | <i>AKR1B1</i>    | Body    |
| cg10012059 | 19 | 4,327,106   | 2.1E-05  | 0.260 | 0.273 |          |       |     | <i>STAP2</i>     | Body    |
| cg06871582 | 12 | 59,990,420  | 0.004682 | 0.260 | 0.224 |          |       |     |                  |         |
| cg15599668 | 5  | 150,005,953 | 3.01E-09 | 0.260 | 0.269 |          |       |     | <i>SYNPO</i>     | Body    |
| cg03771840 | 6  | 30,140,145  | 1.74E-09 | 0.260 | 0.250 |          |       |     | <i>TRIM15</i>    | 3'UTR   |
| cg22769941 | 11 | 20,690,628  | 0.018877 | 0.260 | 0.265 |          |       |     | <i>NELL1</i>     | TSS1500 |

|            |    |             |          |       |       |  |  |  |                 |         |
|------------|----|-------------|----------|-------|-------|--|--|--|-----------------|---------|
| cg12681370 | 2  | 218,794,733 | 2.42E-16 | 0.260 | 0.257 |  |  |  | <i>TNS1</i>     | 5'UTR   |
| cg07002403 | 10 | 68,687,951  | 0.004039 | 0.260 | 0.245 |  |  |  | <i>CTNNA3</i>   | Body    |
| cg08795279 | 16 | 56,623,816  | 5.91E-07 | 0.260 | 0.191 |  |  |  | <i>MT3</i>      | Body    |
| cg13390441 | 9  | 132,962,957 | 4.62E-15 | 0.260 | 0.273 |  |  |  | <i>FREQ</i>     | Body    |
| cg20898283 | 14 | 75,920,198  | 1E-11    | 0.260 | 0.220 |  |  |  | <i>JDP2</i>     | Body    |
| cg01100068 | 1  | 58,715,747  | 1.34E-05 | 0.260 | 0.227 |  |  |  | <i>DAB1</i>     | 5'UTR   |
| cg02391713 | 6  | 105,400,985 | 0.047306 | 0.260 | 0.251 |  |  |  |                 |         |
| cg14662355 | 1  | 165,324,810 | 6.6E-05  | 0.260 | 0.321 |  |  |  | <i>LMX1A</i>    | 5'UTR   |
| cg17753212 | 17 | 6,659,562   | 0.001405 | 0.260 | 0.233 |  |  |  | <i>XAF1</i>     | Body    |
| cg14377703 | 17 | 19,647,973  | 6.08E-05 | 0.260 | 0.305 |  |  |  | <i>ALDH3A1</i>  | Body    |
| cg15735157 | 7  | 22,974,608  | 2.94E-20 | 0.260 | 0.242 |  |  |  |                 |         |
| cg08432013 | 11 | 83,393,570  | 0.001055 | 0.260 | 0.260 |  |  |  | <i>DLG2</i>     | Body    |
| cg13377264 | 6  | 30,419,135  | 2.93E-05 | 0.260 | 0.305 |  |  |  |                 |         |
| cg24996161 | 5  | 140,735,397 | 4.66E-05 | 0.260 | 0.255 |  |  |  | <i>PCDHGA2</i>  | Body    |
| cg00959431 | 9  | 79,638,117  | 1.4E-08  | 0.260 | 0.214 |  |  |  |                 |         |
| cg24874350 | 20 | 45,440,346  | 1.65E-53 | 0.260 | 0.252 |  |  |  |                 |         |
| cg08305942 | 16 | 79,692,354  | 9.99E-14 | 0.260 | 0.240 |  |  |  |                 |         |
| cg11888511 | 7  | 33,663,100  | 1.49E-16 | 0.260 | 0.271 |  |  |  |                 |         |
| cg13321114 | 6  | 29,760,023  | 0.000125 | 0.260 | 0.305 |  |  |  | <i>HCG4</i>     | Body    |
| cg26257411 | 6  | 33,397,122  | 2.8E-13  | 0.260 | 0.259 |  |  |  | <i>SYNGAP1</i>  | Body    |
| cg19566774 | 14 | 67,656,082  | 2.67E-18 | 0.260 | 0.246 |  |  |  | <i>FAM71D</i>   | TSS200  |
| cg21476299 | 13 | 43,148,214  | 0.000943 | 0.260 | 0.313 |  |  |  | <i>TNFSF11</i>  | TSS200  |
| cg21388327 | 1  | 22,351,548  | 0.012288 | 0.260 | 0.242 |  |  |  | <i>HSPC157</i>  | TSS1500 |
| cg02385840 | 12 | 5,539,588   | 0.00026  | 0.260 | 0.286 |  |  |  |                 |         |
| cg13465477 | 9  | 133,534,961 | 0.008496 | 0.260 | 0.309 |  |  |  |                 |         |
| cg16001722 | 6  | 127,836,159 | 6.15E-05 | 0.260 | 0.241 |  |  |  | <i>C6orf174</i> | Body    |
| cg26301565 | 3  | 194,117,261 | 6.49E-06 | 0.260 | 0.240 |  |  |  | <i>GP5</i>      | 3'UTR   |
| cg00084770 | 10 | 88,149,210  | 0.035151 | 0.260 | 0.312 |  |  |  |                 |         |
| cg11362010 | 3  | 181,442,713 | 5.45E-06 | 0.260 | 0.246 |  |  |  | <i>SOX2OT</i>   | Body    |
| cg19793376 | 9  | 135,462,522 | 0.006554 | 0.260 | 0.269 |  |  |  | <i>BARHL1</i>   | Body    |
| cg22934200 | 2  | 61,407,270  | 0.001024 | 0.260 | 0.301 |  |  |  | <i>AHSA2</i>    | 5'UTR   |
| cg00121626 | Y  | 21,664,296  | 0.004351 | 0.260 | 0.193 |  |  |  | <i>BCORL2</i>   | Body    |
| cg13692543 | 9  | 35,510,933  | 4.62E-06 | 0.260 | 0.226 |  |  |  | <i>RUSC2</i>    | 5'UTR   |
| cg15397231 | 6  | 31,239,074  | 1.42E-08 | 0.260 | 0.213 |  |  |  | <i>HLA-C</i>    | Body    |

|            |    |             |          |       |       |          |       |     |                 |         |
|------------|----|-------------|----------|-------|-------|----------|-------|-----|-----------------|---------|
| cg06175981 | 2  | 220,387,980 | 4.91E-08 | 0.259 | 0.232 |          |       |     | <i>ACCN4</i>    | Body    |
| cg12219325 | 8  | 59,058,585  | 7.32E-06 | 0.259 | 0.236 |          |       |     | <i>FAM110B</i>  | 5'UTR   |
| cg23082862 | 10 | 128,993,115 | 9.32E-08 | 0.259 | 0.235 |          |       |     | <i>FAM196A</i>  | 5'UTR   |
| cg27393010 | 7  | 121,940,216 | 8.35E-05 | 0.259 | 0.284 |          |       |     |                 |         |
| cg01552731 | 19 | 46,806,907  | 5.46E-32 | 0.259 | 0.237 |          |       |     | <i>HIF3A</i>    | 1stExon |
| cg09263118 | 19 | 11,531,294  | 0.008452 | 0.259 | 0.322 |          |       |     | <i>RGL3</i>     | TSS1500 |
| cg27208307 | 10 | 70,847,399  | 0.006093 | 0.259 | 0.113 | 2.85E-11 | 0.158 |     | <i>SRGN</i>     | TSS1500 |
| cg00777079 | 17 | 1,666,607   | 6.32E-11 | 0.259 | 0.244 |          |       |     | <i>SERPINF1</i> | 5'UTR   |
| cg24390913 | 10 | 118,899,788 | 0.007169 | 0.259 | 0.366 |          |       |     |                 |         |
| cg00089915 | 1  | 66,999,684  | 0.016657 | 0.259 | 0.228 |          |       |     | <i>SGIP1</i>    | TSS200  |
| cg20372230 | 7  | 127,911,967 | 5.41E-07 | 0.259 | 0.232 |          |       |     |                 |         |
| cg26180126 | 2  | 70,779,764  | 0.006605 | 0.259 | 0.220 |          |       |     | <i>TGFA</i>     | Body    |
| cg00964997 | 4  | 13,531,195  | 5.2E-07  | 0.259 | 0.243 |          |       |     |                 |         |
| cg25197238 | 1  | 18,335,878  | 8.28E-08 | 0.259 | 0.247 |          |       |     |                 |         |
| cg23385492 | 7  | 158,325,118 | 4.94E-06 | 0.259 | 0.202 |          |       | Yes | <i>PTPRN2</i>   | Body    |
| cg23668195 | 2  | 62,805,851  | 6.6E-07  | 0.259 | 0.305 |          |       |     |                 |         |
| cg08195491 | 16 | 50,746,063  | 1.36E-07 | 0.259 | 0.211 |          |       |     | <i>NOD2</i>     | Body    |
| cg23244488 | 7  | 19,146,032  | 0.002139 | 0.259 | 0.292 |          |       |     |                 |         |
| cg05675373 | 1  | 110,754,257 | 8.91E-05 | 0.259 | 0.229 | 1.72E-09 | 0.152 |     | <i>KCNC4</i>    | 1stExon |
| cg16302441 | 2  | 25,391,830  | 2.73E-05 | 0.259 | 0.228 | 7.68E-18 | 0.199 |     | <i>POMC</i>     | TSS1500 |
| cg03625676 | 5  | 156,887,393 | 0.021977 | 0.259 | 0.110 |          |       |     | <i>NIPAL4</i>   | Body    |
| cg03520683 | 13 | 95,355,814  | 3.79E-05 | 0.259 | 0.284 |          |       |     |                 |         |
| cg02965078 | 11 | 60,623,504  | 1.47E-10 | 0.259 | 0.245 | 1.74E-19 | 0.113 |     | <i>GPR44</i>    | TSS200  |
| cg11498156 | 10 | 102,890,145 | 3.27E-12 | 0.259 | 0.254 | 2.7E-08  | 0.122 |     | <i>TLX1</i>     | TSS1500 |
| cg13197216 | 8  | 23,567,658  | 1.21E-06 | 0.259 | 0.223 |          |       |     |                 |         |
| cg16785291 | 7  | 133,974,228 | 3.06E-22 | 0.259 | 0.237 |          |       |     | <i>SLC35B4</i>  | 3'UTR   |
| cg26824006 | 7  | 121,957,254 | 0.000162 | 0.259 | 0.240 |          |       |     |                 |         |
| cg01385708 | 16 | 4,373,570   | 2.54E-23 | 0.259 | 0.247 |          |       |     |                 |         |
| cg06387842 | 3  | 184,099,096 | 3.25E-05 | 0.259 | 0.247 |          |       |     | <i>CHRD</i>     | Body    |
| cg13923648 | 6  | 27,173,910  | 3.48E-05 | 0.259 | 0.258 |          |       |     |                 |         |
| cg19619014 | 8  | 37,250,930  | 2.26E-05 | 0.259 | 0.237 |          |       |     |                 |         |
| cg20328456 | 6  | 32,121,113  | 2.14E-05 | 0.259 | 0.302 |          |       |     | <i>PPT2</i>     | TSS200  |
| cg24570303 | 10 | 102,900,491 | 0.003127 | 0.259 | 0.234 |          |       |     |                 |         |
| cg24683680 | 2  | 176,948,864 | 3.55E-05 | 0.259 | 0.287 |          |       |     | <i>EVX2</i>     | TSS200  |

|            |    |             |          |       |       |          |       |     |                   |         |
|------------|----|-------------|----------|-------|-------|----------|-------|-----|-------------------|---------|
| cg15450098 | 1  | 221,057,561 | 1.06E-12 | 0.259 | 0.231 |          |       |     | <i>HLX</i>        | Body    |
| cg16083838 | 11 | 2,889,809   | 1.2E-07  | 0.259 | 0.237 |          |       |     | <i>KCNQ1DN</i>    | TSS1500 |
| cg04080282 | 7  | 95,026,106  | 1.26E-05 | 0.259 | 0.225 |          |       |     | <i>PON3</i>       | TSS1500 |
| cg20725021 | 3  | 187,009,575 | 5.13E-12 | 0.259 | 0.250 | 2.69E-23 | 0.166 |     | <i>MASP1</i>      | 5'UTR   |
| cg21002146 | 14 | 92,303,622  | 1.41E-05 | 0.259 | 0.228 |          |       |     | <i>TC2N</i>       | TSS1500 |
| cg03894490 | 3  | 159,942,832 | 0.001752 | 0.259 | 0.190 |          |       |     | <i>LOC401097</i>  | TSS1500 |
| cg07462756 | 4  | 4,859,985   | 3.22E-09 | 0.259 | 0.210 |          |       |     | <i>MSX1</i>       | TSS1500 |
| cg01759597 | 7  | 96,626,788  | 4.07E-05 | 0.259 | 0.253 |          |       |     | <i>DLX6AS</i>     | Body    |
| cg07842521 | 16 | 85,157,762  | 1.7E-15  | 0.259 | 0.245 |          |       |     |                   |         |
| cg09084462 | 10 | 27,220,234  | 1.1E-08  | 0.259 | 0.253 |          |       |     | <i>NCRNA00202</i> | Body    |
| cg21147709 | 1  | 12,004,662  | 1.96E-06 | 0.259 | 0.252 |          |       |     | <i>PLOD1</i>      | Body    |
| cg03805475 | 22 | 46,972,501  | 0.021722 | 0.259 | 0.215 |          |       |     |                   |         |
| cg01009664 | 3  | 129,693,613 | 0.003302 | 0.259 | 0.299 | 1.96E-10 | 0.189 |     | <i>TRH</i>        | 5'UTR   |
| cg03990033 | 1  | 208,084,030 | 1.11E-06 | 0.259 | 0.211 |          |       |     | <i>CD34</i>       | Body    |
| cg04567445 | 1  | 65,730,409  | 1.15E-06 | 0.259 | 0.230 |          |       |     | <i>DNAJC6</i>     | TSS200  |
| cg09821007 | X  | 68,348,763  | 2.79E-07 | 0.259 | 0.268 |          |       |     |                   |         |
| cg01858517 | 10 | 79,396,584  | 0.005354 | 0.259 | 0.195 |          |       |     | <i>KCNMA1</i>     | Body    |
| cg02338271 | 1  | 171,868,115 | 2.42E-13 | 0.259 | 0.238 |          |       |     | <i>DNM3</i>       | Body    |
| cg00211821 | 17 | 16,978,673  | 3.49E-05 | 0.259 | 0.269 |          |       |     | <i>MPRIIP</i>     | Body    |
| cg12873454 | 1  | 14,924,611  | 0.005549 | 0.259 | 0.083 |          |       |     | <i>KIAA1026</i>   | TSS1500 |
| cg17310600 | 4  | 165,305,334 | 1E-05    | 0.259 | 0.285 |          |       |     | <i>MARCH1</i>     | TSS1500 |
| cg22476027 | 6  | 108,492,642 | 1.44E-05 | 0.259 | 0.289 |          |       |     | <i>NR2E1</i>      | Body    |
| cg07500347 | 16 | 875,881     | 0.021329 | 0.259 | 0.232 |          |       |     |                   |         |
| cg20600210 | 20 | 57,090,013  | 0.000132 | 0.259 | 0.253 |          |       |     | <i>APCDD1L</i>    | TSS200  |
| cg06065019 | 2  | 177,356,276 | 7.03E-10 | 0.259 | 0.230 |          |       |     |                   |         |
| cg12626589 | 6  | 32,120,783  | 4.67E-05 | 0.259 | 0.308 |          |       |     | <i>PPT2</i>       | TSS1500 |
| cg22879282 | 15 | 32,634,505  | 0.040343 | 0.259 | 0.344 |          |       |     |                   |         |
| cg26288249 | 9  | 112,810,954 | 0.003407 | 0.259 | 0.136 |          |       |     | <i>AKAP2</i>      | TSS200  |
| cg24254387 | 1  | 45,273,495  | 0.040167 | 0.259 | 0.198 |          |       |     | <i>BTBD19</i>     | TSS1500 |
| cg05605029 | 17 | 16,189,554  | 0.001176 | 0.259 | 0.308 |          |       |     | <i>PIGL</i>       | Body    |
| cg14090647 | 22 | 24,108,000  | 1.04E-20 | 0.259 | 0.242 |          |       | Yes | <i>C22orf15</i>   | 3'UTR   |
| cg27662832 | 2  | 210,444,327 | 2.27E-08 | 0.259 | 0.272 |          |       |     | <i>MAP2</i>       | TSS200  |
| cg03899054 | 8  | 143,206,674 | 2.34E-05 | 0.259 | 0.295 |          |       |     |                   |         |
| cg05017199 | 7  | 150,497,065 | 0.003173 | 0.259 | 0.165 |          |       |     | <i>TMEM176B</i>   | TSS1500 |

|            |    |             |          |       |       |          |       |  |                |         |
|------------|----|-------------|----------|-------|-------|----------|-------|--|----------------|---------|
| cg12598524 | 2  | 46,088,325  | 4.38E-06 | 0.259 | 0.279 |          |       |  | <i>PRKCE</i>   | Body    |
| cg12753606 | 6  | 135,504,989 | 0.01012  | 0.259 | 0.128 |          |       |  | <i>MYB</i>     | Body    |
| cg13687570 | 19 | 37,825,320  | 0.01327  | 0.259 | 0.148 |          |       |  | <i>HKR1</i>    | TSS1500 |
| cg08335389 | 12 | 109,554,302 | 8.57E-14 | 0.259 | 0.272 |          |       |  |                |         |
| cg14184400 | 3  | 49,460,057  | 3.42E-12 | 0.259 | 0.268 |          |       |  | <i>AMT</i>     | Body    |
| cg01777341 | 12 | 51,784,862  | 9.24E-12 | 0.259 | 0.211 |          |       |  | <i>GALNT6</i>  | 5'UTR   |
| cg10927461 | 2  | 122,530,159 | 1.59E-08 | 0.259 | 0.272 |          |       |  |                |         |
| cg16746576 | 8  | 99,962,118  | 3.05E-07 | 0.259 | 0.260 |          |       |  | <i>OSR2</i>    | Body    |
| cg19634315 | 15 | 71,679,485  | 1.06E-05 | 0.259 | 0.230 |          |       |  | <i>THSD4</i>   | Body    |
| cg08425203 | 3  | 128,764,940 | 1.84E-05 | 0.259 | 0.223 |          |       |  |                |         |
| cg08537660 | 11 | 12,699,661  | 4.2E-08  | 0.259 | 0.245 |          |       |  | <i>TEAD1</i>   | 5'UTR   |
| cg08610862 | 1  | 197,888,469 | 0.031109 | 0.259 | 0.376 |          |       |  | <i>LHX9</i>    | Body    |
| cg13672078 | 5  | 87,439,429  | 0.014109 | 0.259 | 0.271 |          |       |  |                |         |
| cg20466166 | 1  | 32,666,735  | 0.025042 | 0.259 | 0.138 |          |       |  | <i>CCDC28B</i> | 5'UTR   |
| cg07475000 | 7  | 22,162,928  | 2.54E-17 | 0.259 | 0.240 |          |       |  | <i>RAPGEF5</i> | Body    |
| cg11505026 | 2  | 46,067,299  | 3.24E-12 | 0.259 | 0.240 |          |       |  | <i>PRKCE</i>   | Body    |
| cg23854488 | 11 | 69,588,848  | 0.007565 | 0.259 | 0.280 |          |       |  | <i>FGF4</i>    | Body    |
| cg18349298 | 3  | 158,450,550 | 2.05E-21 | 0.259 | 0.252 |          |       |  | <i>RARRES1</i> | TSS1500 |
| cg06728055 | 3  | 149,294,286 | 0.003457 | 0.259 | 0.209 |          |       |  | <i>WWTR1</i>   | Body    |
| cg13298538 | 12 | 1,759,721   | 7.27E-12 | 0.259 | 0.269 |          |       |  |                |         |
| cg16336494 | 6  | 151,188,259 | 1E-09    | 0.259 | 0.257 |          |       |  | <i>MTHFD1L</i> | Body    |
| cg14609025 | 1  | 119,550,983 | 0.004886 | 0.259 | 0.261 |          |       |  |                |         |
| cg16887264 | 4  | 147,561,775 | 0.020228 | 0.259 | 0.211 |          |       |  | <i>POU4F2</i>  | Body    |
| cg00908292 | 17 | 38,699,009  | 8.12E-16 | 0.259 | 0.243 |          |       |  |                |         |
| cg18396533 | 10 | 82,116,208  | 2.28E-06 | 0.259 | 0.186 | 4.98E-15 | 0.198 |  | <i>DYDC2</i>   | TSS1500 |
| cg06630413 | 12 | 54,366,875  | 0.001259 | 0.259 | 0.333 |          |       |  | <i>HOXC11</i>  | TSS200  |
| cg06763161 | 1  | 33,813,745  | 2.67E-19 | 0.259 | 0.259 |          |       |  | <i>PHC2</i>    | 5'UTR   |
| cg01673674 | 8  | 97,166,036  | 3.65E-06 | 0.259 | 0.253 |          |       |  | <i>GDF6</i>    | Body    |
| cg10373891 | 13 | 52,338,758  | 0.0009   | 0.259 | 0.266 |          |       |  |                |         |
| cg16758813 | 6  | 50,818,862  | 2.11E-05 | 0.259 | 0.259 |          |       |  |                |         |
| cg23664396 | 1  | 23,895,366  | 1.55E-17 | 0.259 | 0.259 |          |       |  |                |         |
| cg17024199 | 17 | 74,881,747  | 1.47E-06 | 0.259 | 0.222 |          |       |  | <i>MGAT5B</i>  | Body    |
| cg02466572 | 10 | 94,826,319  | 1.79E-10 | 0.259 | 0.221 |          |       |  | <i>CYP26C1</i> | Body    |
| cg14249564 | 11 | 12,340,382  | 5.11E-14 | 0.259 | 0.273 |          |       |  | <i>MICALCL</i> | Body    |



|            |    |             |          |       |       |          |       |  |                |         |
|------------|----|-------------|----------|-------|-------|----------|-------|--|----------------|---------|
| cg20267775 | 1  | 171,623,695 | 6.91E-12 | 0.259 | 0.250 |          |       |  |                |         |
| cg23325673 | 19 | 34,397,439  | 3.93E-06 | 0.259 | 0.195 |          |       |  |                |         |
| cg00197058 | 17 | 59,554,672  | 2.3E-14  | 0.259 | 0.243 |          |       |  | <i>TBX4</i>    | Body    |
| cg01122167 | 5  | 149,650,243 | 4.11E-09 | 0.259 | 0.252 |          |       |  | <i>CAMK2A</i>  | Body    |
| cg03344332 | 8  | 116,452,420 | 1.4E-20  | 0.259 | 0.265 |          |       |  | <i>TRPS1</i>   | Body    |
| cg06634716 | 1  | 217,311,151 | 0.000606 | 0.259 | 0.265 |          |       |  | <i>ESRRG</i>   | TSS200  |
| cg12537796 | X  | 106,515,818 | 0.028917 | 0.259 | 0.298 | 3.16E-13 | 0.149 |  |                |         |
| cg18270687 | 1  | 39,035,982  | 0.027901 | 0.259 | 0.307 |          |       |  |                |         |
| cg20421058 | 4  | 7,337,225   | 1.21E-12 | 0.259 | 0.271 |          |       |  | <i>SORCS2</i>  | Body    |
| cg03111404 | 6  | 28,175,984  | 0.000477 | 0.259 | 0.218 |          |       |  |                |         |
| cg01704474 | 11 | 504,918     | 0.003717 | 0.259 | 0.231 |          |       |  | <i>RNH1</i>    | 5'UTR   |
| cg07296447 | 7  | 1,286,023   | 0.000445 | 0.259 | 0.246 |          |       |  |                |         |
| cg13718539 | 5  | 140,801,354 | 3.38E-06 | 0.259 | 0.268 |          |       |  | <i>PCDHGA4</i> | Body    |
| cg14036143 | 1  | 145,415,441 | 3.37E-10 | 0.259 | 0.260 |          |       |  | <i>HFE2</i>    | 5'UTR   |
| cg19717326 | 19 | 54,370,016  | 3.49E-14 | 0.259 | 0.263 | 6.59E-24 | 0.168 |  | <i>MYADM</i>   | TSS1500 |
| cg24169669 | 14 | 38,092,080  | 0.000165 | 0.259 | 0.262 |          |       |  |                |         |
| cg05686497 | 5  | 127,874,587 | 0.021205 | 0.259 | 0.339 |          |       |  | <i>FBN2</i>    | TSS1500 |
| cg00957901 | 4  | 41,614,842  | 6.91E-06 | 0.259 | 0.202 |          |       |  | <i>LIMCH1</i>  | TSS200  |
| cg12476188 | 15 | 66,999,484  | 6.56E-26 | 0.259 | 0.266 |          |       |  | <i>SMAD6</i>   | TSS1500 |
| cg21992932 | 2  | 159,651,813 | 0.000104 | 0.259 | 0.265 |          |       |  | <i>DAPL1</i>   | TSS200  |
| cg08835113 | 7  | 96,650,192  | 6.77E-06 | 0.259 | 0.254 |          |       |  | <i>DLX5</i>    | Body    |
| cg11533712 | 22 | 46,934,981  | 1.85E-08 | 0.259 | 0.236 |          |       |  |                |         |
| cg09272948 | 20 | 39,958,363  | 1.07E-06 | 0.259 | 0.239 |          |       |  |                |         |
| cg18474072 | 10 | 664,762     | 2.92E-06 | 0.259 | 0.287 |          |       |  | <i>DIP2C</i>   | Body    |
| cg20691080 | 4  | 6,200,500   | 0.004175 | 0.259 | 0.186 |          |       |  | <i>JAKMIP1</i> | 5'UTR   |
| cg16251647 | 6  | 25,832,228  | 0.000924 | 0.258 | 0.175 |          |       |  | <i>SLC17A1</i> | 1stExon |
| cg05080940 | 16 | 11,256,561  | 3.32E-06 | 0.258 | 0.232 |          |       |  | <i>CLEC16A</i> | Body    |
| cg13406145 | 15 | 89,952,052  | 0.005527 | 0.258 | 0.264 |          |       |  |                |         |
| cg14502980 | 11 | 125,133,439 | 1.29E-11 | 0.258 | 0.283 |          |       |  | <i>PKNOX2</i>  | 5'UTR   |
| cg09094674 | 16 | 23,194,733  | 4.35E-05 | 0.258 | 0.197 |          |       |  | <i>SCNN1G</i>  | 5'UTR   |
| cg14177084 | 7  | 75,269,642  | 1.34E-17 | 0.258 | 0.230 |          |       |  | <i>HIP1</i>    | Body    |
| cg27367721 | 16 | 20,917,257  | 4.52E-06 | 0.258 | 0.254 |          |       |  | <i>LYRM1</i>   | 5'UTR   |
| cg03521044 | 7  | 20,838,564  | 5.41E-05 | 0.258 | 0.189 |          |       |  |                |         |
| cg07838943 | 1  | 12,493,840  | 5.27E-12 | 0.258 | 0.209 |          |       |  | <i>VPS13D</i>  | Body    |

|            |    |             |          |       |       |  |  |  |                 |         |
|------------|----|-------------|----------|-------|-------|--|--|--|-----------------|---------|
| cg16994941 | 5  | 141,218,887 | 3.37E-08 | 0.258 | 0.250 |  |  |  |                 |         |
| cg02943578 | 16 | 86,600,499  | 0.004711 | 0.258 | 0.239 |  |  |  | <i>FOXC2</i>    | TSS1500 |
| cg07833019 | 5  | 38,258,007  | 0.003714 | 0.258 | 0.296 |  |  |  | <i>EGFLAM</i>   | TSS1500 |
| cg24713529 | 22 | 50,965,126  | 0.031679 | 0.258 | 0.187 |  |  |  | <i>TYMP</i>     | Body    |
| cg10723962 | 6  | 26,240,782  | 0.001224 | 0.258 | 0.309 |  |  |  | <i>HIST1H4F</i> | 1stExon |
| cg17974767 | X  | 48,690,187  | 0.000229 | 0.258 | 0.267 |  |  |  | <i>PCSK1N</i>   | Body    |
| cg11849281 | 7  | 35,494,507  | 0.000793 | 0.258 | 0.170 |  |  |  |                 |         |
| cg01181415 | 12 | 16,757,954  | 9.37E-06 | 0.258 | 0.190 |  |  |  | <i>LMO3</i>     | 5'UTR   |
| cg01440841 | 4  | 154,681,066 | 0.000377 | 0.258 | 0.270 |  |  |  | <i>RNF175</i>   | 5'UTR   |
| cg26477488 | 5  | 153,858,936 | 0.025682 | 0.258 | 0.312 |  |  |  | <i>HAND1</i>    | TSS1500 |
| cg00883831 | 2  | 208,636,032 | 1.71E-11 | 0.258 | 0.244 |  |  |  |                 |         |
| cg00336700 | 2  | 176,943,704 | 5.7E-10  | 0.258 | 0.212 |  |  |  |                 |         |
| cg07180646 | 1  | 15,481,541  | 9.58E-12 | 0.258 | 0.250 |  |  |  | <i>TMEM51</i>   | 5'UTR   |
| cg23144681 | 10 | 23,488,710  | 0.025044 | 0.258 | 0.262 |  |  |  |                 |         |
| cg03621841 | 16 | 49,673,985  | 0.011923 | 0.258 | 0.210 |  |  |  | <i>ZNF423</i>   | Body    |
| cg18147485 | 8  | 110,986,685 | 0.046885 | 0.258 | 0.308 |  |  |  | <i>KCNV1</i>    | 5'UTR   |
| cg19465605 | 14 | 91,770,229  | 3.36E-21 | 0.258 | 0.217 |  |  |  | <i>CCDC88C</i>  | Body    |
| cg23619399 | 13 | 79,169,753  | 0.028258 | 0.258 | 0.340 |  |  |  |                 |         |
| cg04469167 | 9  | 27,529,907  | 0.024677 | 0.258 | 0.104 |  |  |  | <i>MOBKL2B</i>  | TSS200  |
| cg07541744 | 16 | 55,363,277  | 7.64E-05 | 0.258 | 0.279 |  |  |  | <i>IRX6</i>     | Body    |
| cg19862899 | 10 | 82,173,556  | 3.91E-07 | 0.258 | 0.227 |  |  |  | <i>C10orf58</i> | TSS200  |
| cg27054162 | 16 | 54,628,834  | 0.000486 | 0.258 | 0.203 |  |  |  |                 |         |
| cg14195216 | 12 | 99,548,950  | 5.26E-14 | 0.258 | 0.262 |  |  |  | <i>ANKS1B</i>   | TSS1500 |
| cg02360980 | 15 | 41,804,283  | 0.020405 | 0.258 | 0.231 |  |  |  | <i>LTK</i>      | Body    |
| cg02650401 | 3  | 181,441,501 | 2.08E-08 | 0.258 | 0.244 |  |  |  | <i>SOX2OT</i>   | Body    |
| cg26926138 | 4  | 54,960,034  | 2.66E-10 | 0.258 | 0.247 |  |  |  |                 |         |
| cg23777956 | 19 | 4,153,671   | 2.9E-06  | 0.258 | 0.245 |  |  |  | <i>CREB3L3</i>  | 1stExon |
| cg19766988 | 19 | 10,231,711  | 1.09E-16 | 0.258 | 0.241 |  |  |  | <i>EIF3G</i>    | TSS1500 |
| cg26275431 | 5  | 140,773,122 | 0.004831 | 0.258 | 0.334 |  |  |  | <i>PCDHGA4</i>  | Body    |
| cg08354053 | 17 | 30,630,872  | 9.53E-07 | 0.258 | 0.230 |  |  |  | <i>RHBDL3</i>   | Body    |
| cg10784570 | 11 | 69,452,398  | 0.00057  | 0.258 | 0.293 |  |  |  |                 |         |
| cg16488580 | 5  | 173,097,570 | 9.08E-12 | 0.258 | 0.239 |  |  |  |                 |         |
| cg15988350 | 7  | 32,110,650  | 0.027486 | 0.258 | 0.281 |  |  |  | <i>PDE1C</i>    | 5'UTR   |
| cg11763830 | 17 | 72,231,400  | 1.16E-05 | 0.258 | 0.289 |  |  |  | <i>TTYH2</i>    | Body    |

|            |    |             |          |       |       |          |       |  |                 |         |
|------------|----|-------------|----------|-------|-------|----------|-------|--|-----------------|---------|
| cg24856726 | 12 | 108,169,333 | 9.25E-06 | 0.258 | 0.215 |          |       |  | <i>ASCL4</i>    | 1stExon |
| cg12075247 | 12 | 47,226,029  | 0.000646 | 0.258 | 0.220 |          |       |  |                 |         |
| cg00425764 | 16 | 15,949,616  | 0.000337 | 0.258 | 0.277 |          |       |  | <i>MYH11</i>    | 5'UTR   |
| cg03954667 | 12 | 11,806,065  | 7.62E-06 | 0.258 | 0.258 |          |       |  | <i>ETV6</i>     | Body    |
| cg09006015 | 3  | 112,051,908 | 0.04581  | 0.258 | 0.333 |          |       |  | <i>CD200</i>    | TSS200  |
| cg22559013 | 1  | 78,693,899  | 0.002046 | 0.258 | 0.146 |          |       |  | <i>MGC27382</i> | TSS1500 |
| cg00295794 | 13 | 100,641,409 | 0.046193 | 0.258 | 0.291 |          |       |  |                 |         |
| cg07882059 | 11 | 68,924,751  | 8.79E-14 | 0.258 | 0.228 |          |       |  |                 |         |
| cg22232207 | 20 | 44,746,825  | 0.000288 | 0.258 | 0.308 |          |       |  | <i>CD40</i>     | TSS200  |
| cg00387220 | 17 | 48,071,685  | 0.006228 | 0.258 | 0.220 |          |       |  | <i>DLX3</i>     | Body    |
| cg19520763 | 3  | 38,534,710  | 8.29E-18 | 0.258 | 0.267 |          |       |  |                 |         |
| cg19868364 | 14 | 104,734,368 | 0.001305 | 0.258 | 0.210 |          |       |  |                 |         |
| cg00576250 | 20 | 45,087,765  | 0.000277 | 0.258 | 0.146 | 1.95E-13 | 0.145 |  |                 |         |
| cg14535068 | 2  | 220,416,419 | 0.000982 | 0.258 | 0.208 |          |       |  | <i>OBSL1</i>    | Body    |
| cg26361533 | 12 | 2,445,561   | 8.57E-06 | 0.258 | 0.252 |          |       |  | <i>CACNA1C</i>  | Body    |
| cg07825347 | 10 | 43,600,497  | 5.1E-06  | 0.258 | 0.248 |          |       |  | <i>RET</i>      | Body    |
| cg00344443 | 11 | 115,530,150 | 2.7E-07  | 0.258 | 0.209 |          |       |  |                 |         |
| cg15142477 | 18 | 43,915,662  | 3.27E-27 | 0.258 | 0.248 |          |       |  | <i>RNF165</i>   | Body    |
| cg08089301 | 17 | 46,655,561  | 0.041761 | 0.258 | 0.316 | 4.93E-19 | 0.251 |  | <i>HOXB4</i>    | 1stExon |
| cg05873889 | 13 | 44,948,152  | 0.004724 | 0.258 | 0.260 |          |       |  | <i>SERP2</i>    | 1stExon |
| cg19648612 | 15 | 66,274,894  | 0.000473 | 0.258 | 0.258 |          |       |  | <i>MEGF11</i>   | Body    |
| cg13713922 | 2  | 121,625,577 | 2.62E-07 | 0.258 | 0.263 |          |       |  | <i>GLI2</i>     | Body    |
| cg12091642 | 14 | 61,104,566  | 1.05E-05 | 0.258 | 0.262 |          |       |  |                 |         |
| cg17266233 | 11 | 46,382,725  | 4.04E-13 | 0.258 | 0.250 |          |       |  | <i>DGKZ</i>     | Body    |
| cg22695532 | 1  | 84,158,538  | 1.92E-06 | 0.258 | 0.200 |          |       |  |                 |         |
| cg10515731 | 2  | 220,378,996 | 0.037011 | 0.258 | 0.241 |          |       |  | <i>ACCN4</i>    | 5'UTR   |
| cg00379720 | 19 | 23,185,968  | 0.000499 | 0.258 | 0.291 |          |       |  |                 |         |
| cg09354309 | 12 | 22,487,437  | 0.007463 | 0.258 | 0.267 |          |       |  | <i>ST8SIA1</i>  | 5'UTR   |
| cg09258150 | 19 | 10,397,429  | 5.11E-06 | 0.258 | 0.272 |          |       |  | <i>ICAM4</i>    | TSS1500 |
| cg10145246 | 1  | 119,527,884 | 2.24E-05 | 0.258 | 0.280 |          |       |  | <i>TBX15</i>    | 5'UTR   |
| cg11128216 | 11 | 31,825,833  | 0.000113 | 0.258 | 0.264 |          |       |  | <i>PAX6</i>     | Body    |
| cg13190879 | 22 | 28,198,404  | 7.5E-08  | 0.258 | 0.229 |          |       |  | <i>MN1</i>      | TSS1500 |
| cg09027133 | 1  | 25,945,042  | 4.06E-18 | 0.258 | 0.244 |          |       |  | <i>MAN1C1</i>   | Body    |
| cg16905506 | 1  | 155,035,748 | 0.001242 | 0.258 | 0.163 |          |       |  | <i>EFNA4</i>    | TSS1500 |

|            |    |             |          |       |       |          |       |     |           |         |
|------------|----|-------------|----------|-------|-------|----------|-------|-----|-----------|---------|
| cg10539700 | 2  | 182,644,898 | 8.9E-13  | 0.258 | 0.218 |          |       |     |           |         |
| cg09166091 | 2  | 216,484,055 | 0.006849 | 0.258 | 0.217 |          |       |     |           |         |
| cg22234897 | 17 | 7,826,291   | 0.015798 | 0.258 | 0.265 |          |       |     | KCNAB3    | 3'UTR   |
| cg22344830 | 1  | 1,935,048   | 0.019878 | 0.258 | 0.303 |          |       |     | KIAA1751  | 5'UTR   |
| cg05052633 | 17 | 29,249,485  | 0.015057 | 0.258 | 0.223 | 4.87E-09 | 0.135 |     | ADAP2     | Body    |
| cg05098432 | 10 | 95,848,734  | 2.28E-05 | 0.258 | 0.225 |          |       |     | PLCE1     | TSS200  |
| cg21974358 | 12 | 52,115,678  | 0.00207  | 0.258 | 0.274 |          |       | Yes | SCN8A     | Body    |
| cg08169778 | 11 | 115,846,336 | 1.28E-07 | 0.258 | 0.218 |          |       |     |           |         |
| cg04131101 | 11 | 94,427,846  | 1.05E-18 | 0.258 | 0.242 |          |       |     |           |         |
| cg09171562 | 17 | 17,011,443  | 1.08E-15 | 0.258 | 0.242 |          |       |     | MPRIP     | Body    |
| cg20083676 | 9  | 91,605,999  | 3.67E-14 | 0.258 | 0.226 | 2.07E-34 | 0.268 |     | C9orf47   | 1stExon |
| cg17531456 | X  | 134,124,939 | 0.042258 | 0.258 | 0.276 |          |       |     | LOC644538 | TSS200  |
| cg04414451 | 2  | 108,993,844 | 8.23E-10 | 0.258 | 0.212 |          |       |     | SULT1C4   | TSS1500 |
| cg12804755 | 11 | 15,796,715  | 2.29E-10 | 0.258 | 0.245 |          |       |     |           |         |
| cg13695535 | 5  | 66,124,603  | 0.000622 | 0.258 | 0.115 |          |       |     | MAST4     | 1stExon |
| cg15016701 | 12 | 63,211,683  | 0.001136 | 0.258 | 0.171 |          |       |     | PPM1H     | Body    |
| cg00881207 | 7  | 2,728,912   | 0.001125 | 0.258 | 0.310 |          |       |     | AMZ1      | 5'UTR   |
| cg17128947 | 4  | 779,480     | 3.85E-05 | 0.258 | 0.231 |          |       |     | CPLX1     | 3'UTR   |
| cg24634568 | 1  | 43,250,769  | 2.98E-10 | 0.258 | 0.249 |          |       |     |           |         |
| cg04075191 | 2  | 115,919,785 | 1.31E-06 | 0.258 | 0.294 |          |       |     | DPP10     | Body    |
| cg05183646 | 6  | 134,491,143 | 2.32E-15 | 0.258 | 0.260 |          |       |     | SGK1      | 3'UTR   |
| cg24855781 | 10 | 68,688,167  | 0.004238 | 0.258 | 0.261 |          |       |     | CTNNA3    | Body    |
| cg21649089 | 17 | 14,198,392  | 2.08E-06 | 0.258 | 0.227 |          |       |     |           |         |
| cg04110902 | 6  | 45,500,999  | 1.25E-06 | 0.258 | 0.203 |          |       |     | RUNX2     | Body    |
| cg13341412 | 6  | 124,151,453 | 0.00069  | 0.258 | 0.250 |          |       |     | NKAIN2    | Body    |
| cg23941527 | 5  | 92,868,380  | 1.29E-05 | 0.258 | 0.284 |          |       |     | FLJ42709  | Body    |
| cg20961045 | 17 | 55,952,128  | 3.56E-06 | 0.258 | 0.249 |          |       |     | CUEDC1    | Body    |
| cg25073708 | 9  | 132,083,538 | 0.004913 | 0.258 | 0.190 |          |       |     | C9orf106  | 5'UTR   |
| cg25304107 | 2  | 177,017,331 | 4.22E-07 | 0.258 | 0.220 |          |       |     | HOXD4     | Body    |
| cg16711792 | 21 | 32,930,054  | 0.015753 | 0.258 | 0.198 |          |       |     | TIAM1     | 5'UTR   |
| cg00367463 | 1  | 45,249,899  | 0.000565 | 0.258 | 0.322 |          |       |     | BEST4     | Body    |
| cg01554963 | 17 | 773,023     | 0.001689 | 0.258 | 0.211 |          |       |     | NXN       | Body    |
| cg19917989 | 6  | 14,925,093  | 2.76E-05 | 0.258 | 0.282 |          |       |     |           |         |
| cg20170533 | 13 | 51,417,846  | 0.000695 | 0.258 | 0.282 |          |       |     | DLEU7     | 1stExon |

|            |    |             |          |       |       |            |       |  |                   |         |
|------------|----|-------------|----------|-------|-------|------------|-------|--|-------------------|---------|
| cg15069295 | 2  | 137,522,461 | 3.12E-05 | 0.258 | 0.189 |            |       |  |                   |         |
| cg20752878 | 17 | 7,080,538   | 1.22E-09 | 0.258 | 0.201 |            |       |  | <i>ASGR1</i>      | Body    |
| cg08081424 | 2  | 159,749,591 | 7.74E-09 | 0.258 | 0.255 |            |       |  |                   |         |
| cg13016732 | 11 | 76,858,947  | 9.77E-10 | 0.258 | 0.206 |            |       |  | <i>MYO7A</i>      | Body    |
| cg02061431 | 1  | 92,150,549  | 1.14E-07 | 0.258 | 0.256 |            |       |  | <i>TGFBR3</i>     | Body    |
| cg06071058 | 9  | 96,716,091  | 2.57E-06 | 0.258 | 0.233 |            |       |  | <i>BARX1</i>      | Body    |
| cg09513259 | 9  | 136,039,474 | 5.85E-05 | 0.258 | 0.169 |            |       |  | <i>GBGT1</i>      | TSS200  |
| cg22732101 | 19 | 16,394,638  | 8.97E-06 | 0.258 | 0.246 |            |       |  |                   |         |
| cg23370536 | 4  | 55,523,824  | 0.041931 | 0.258 | 0.153 |            |       |  | <i>KIT</i>        | TSS1500 |
| cg00575851 | X  | 134,232,238 | 0.004071 | 0.258 | 0.274 |            |       |  | <i>NCRNA00087</i> | Body    |
| cg07165756 | 11 | 66,311,422  | 1.76E-14 | 0.258 | 0.249 |            |       |  | <i>ZDHHC24</i>    | Body    |
| cg00852573 | 6  | 73,331,405  | 0.03003  | 0.258 | 0.397 |            |       |  | <i>KCNQ5</i>      | TSS200  |
| cg04883911 | 2  | 208,977,452 | 2.82E-06 | 0.258 | 0.265 |            |       |  |                   |         |
| cg13622450 | 9  | 91,147,514  | 0.000122 | 0.258 | 0.192 |            |       |  |                   |         |
| cg20969194 | 2  | 223,163,175 | 2.32E-06 | 0.258 | 0.200 |            |       |  | <i>PAX3</i>       | Body    |
| cg11633102 | 7  | 67,084,376  | 2.04E-12 | 0.258 | 0.245 |            |       |  |                   |         |
| cg20331288 | 7  | 155,326,803 | 1.15E-05 | 0.258 | 0.290 |            |       |  | <i>CNPY1</i>      | TSS1500 |
| cg00314029 | 2  | 161,348,665 | 6.79E-07 | 0.258 | 0.244 |            |       |  | <i>RBMS1</i>      | Body    |
| cg02388865 | 1  | 26,737,318  | 0.001432 | 0.258 | 0.241 |            |       |  | <i>LIN28</i>      | 1stExon |
| cg00953201 | 13 | 30,156,486  | 8.95E-35 | 0.257 | 0.242 |            |       |  | <i>SLC7A1</i>     | 5'UTR   |
| cg02030542 | 16 | 70,722,454  | 1.06E-13 | 0.257 | 0.242 |            |       |  | <i>VAC14</i>      | Body    |
| cg21077684 | 14 | 95,233,665  | 1.79E-06 | 0.257 | 0.248 |            |       |  |                   |         |
| cg04550737 | 1  | 119,530,600 | 0.032889 | 0.257 | 0.172 |            |       |  | <i>TBX15</i>      | 5'UTR   |
| cg13181164 | 15 | 37,388,828  | 0.00772  | 0.257 | 0.302 |            |       |  | <i>MEIS2</i>      | Body    |
| cg15157455 | 1  | 149,400,292 | 2.68E-25 | 0.257 | 0.234 |            |       |  | <i>HIST2H2BF</i>  | TSS1500 |
| cg27022956 | 3  | 181,445,025 | 0.000151 | 0.257 | 0.275 |            |       |  | <i>SOX2OT</i>     | Body    |
| cg15859496 | 12 | 118,490,276 | 1.12E-11 | 0.257 | 0.239 |            |       |  | <i>WSB2</i>       | Body    |
| cg22800743 | 6  | 21,954,586  | 0.011503 | 0.257 | 0.173 |            |       |  | <i>FLJ22536</i>   | Body    |
| cg26968378 | 6  | 28,447,087  | 0.002595 | 0.257 | 0.264 |            |       |  |                   |         |
| cg22175764 | 20 | 56,803,964  | 0.041645 | 0.257 | 0.106 | 0.01077803 | 0.048 |  |                   |         |
| cg00584840 | 3  | 112,903,054 | 9.38E-09 | 0.257 | 0.256 |            |       |  |                   |         |
| cg15538767 | 5  | 149,870,395 | 1.08E-18 | 0.257 | 0.231 |            |       |  |                   |         |
| cg04025675 | 15 | 45,671,028  | 0.000207 | 0.257 | 0.242 |            |       |  | <i>LOC145663</i>  | Body    |
| cg12053004 | 1  | 221,057,751 | 2.7E-09  | 0.257 | 0.221 |            |       |  | <i>HLX</i>        | Body    |

|            |    |             |          |       |       |          |       |  |                 |         |
|------------|----|-------------|----------|-------|-------|----------|-------|--|-----------------|---------|
| cg17563235 | 3  | 54,157,725  | 0.005302 | 0.257 | 0.257 |          |       |  | <i>CACNA2D3</i> | Body    |
| cg07622493 | 8  | 93,114,294  | 0.000264 | 0.257 | 0.295 |          |       |  |                 |         |
| cg05166820 | 6  | 55,444,153  | 1.31E-09 | 0.257 | 0.250 |          |       |  | <i>HMGCLL1</i>  | TSS200  |
| cg02351277 | 3  | 177,397,780 | 1.39E-12 | 0.257 | 0.245 |          |       |  |                 |         |
| cg09674170 | 16 | 3,062,382   | 3.61E-09 | 0.257 | 0.258 |          |       |  | <i>CLDN9</i>    | TSS200  |
| cg09232478 | 1  | 119,548,852 | 0.000133 | 0.257 | 0.259 |          |       |  |                 |         |
| cg01277372 | 3  | 169,378,764 | 2.45E-06 | 0.257 | 0.245 |          |       |  | <i>MECOM</i>    | Body    |
| cg09296270 | 2  | 65,087,288  | 1.61E-10 | 0.257 | 0.182 |          |       |  |                 |         |
| cg23068621 | 5  | 77,139,964  | 0.000133 | 0.257 | 0.241 |          |       |  |                 |         |
| cg12434747 | 15 | 70,740,470  | 2.37E-18 | 0.257 | 0.224 |          |       |  |                 |         |
| cg16331051 | 2  | 75,788,552  | 0.00513  | 0.257 | 0.156 |          |       |  | <i>FAM176A</i>  | 5'UTR   |
| cg18842363 | 6  | 31,629,088  | 3.88E-09 | 0.257 | 0.230 |          |       |  | <i>C6orf47</i>  | TSS1500 |
| cg21156129 | 1  | 54,941,031  | 0.000816 | 0.257 | 0.202 |          |       |  |                 |         |
| cg06035815 | 6  | 26,189,597  | 0.003577 | 0.257 | 0.224 |          |       |  | <i>HIST1H4D</i> | TSS1500 |
| cg18144647 | 8  | 41,113,257  | 3.04E-10 | 0.257 | 0.232 |          |       |  |                 |         |
| cg21629500 | 5  | 2,754,753   | 1.47E-10 | 0.257 | 0.241 |          |       |  | <i>C5orf38</i>  | Body    |
| cg26530319 | 1  | 221,060,923 | 4.33E-09 | 0.257 | 0.253 |          |       |  |                 |         |
| cg16355771 | 3  | 13,242,707  | 3.1E-10  | 0.257 | 0.243 |          |       |  |                 |         |
| cg24672833 | 17 | 46,659,318  | 0.003251 | 0.257 | 0.150 |          |       |  |                 |         |
| cg05523897 | 1  | 2,139,175   | 1.06E-12 | 0.257 | 0.225 |          |       |  | <i>C1orf86</i>  | TSS200  |
| cg09160589 | 16 | 11,654,880  | 1.16E-07 | 0.257 | 0.248 |          |       |  | <i>LITAF</i>    | 5'UTR   |
| cg11590420 | 5  | 150,051,566 | 0.000399 | 0.257 | 0.198 |          |       |  | <i>MYOZ3</i>    | Body    |
| cg13711950 | 20 | 43,729,527  | 4.61E-05 | 0.257 | 0.260 |          |       |  | <i>KCNS1</i>    | 5'UTR   |
| cg15859189 | 3  | 65,832,744  | 1.42E-17 | 0.257 | 0.251 |          |       |  | <i>MAGI1</i>    | Body    |
| cg22118524 | 1  | 217,311,547 | 1.8E-05  | 0.257 | 0.248 |          |       |  | <i>ESRRG</i>    | TSS1500 |
| cg20318166 | 15 | 85,360,664  | 3.05E-09 | 0.257 | 0.239 |          |       |  | <i>ALPK3</i>    | 1stExon |
| cg03304610 | 4  | 172,734,276 | 0.012965 | 0.257 | 0.331 |          |       |  | <i>GALNTL6</i>  | TSS1500 |
| cg00790307 | 17 | 17,684,042  | 6.05E-14 | 0.257 | 0.254 |          |       |  | <i>SMCR5</i>    | TSS1500 |
| cg01364253 | X  | 39,679,986  | 2.23E-09 | 0.257 | 0.247 |          |       |  |                 |         |
| cg26532621 | 5  | 177,423,340 | 1.65E-05 | 0.257 | 0.271 |          |       |  | <i>PROP1</i>    | TSS200  |
| cg15101392 | 11 | 117,748,132 | 9.19E-08 | 0.257 | 0.268 |          |       |  | <i>FXVD6</i>    | TSS1500 |
| cg17023034 | 2  | 152,919,487 | 1.01E-08 | 0.257 | 0.275 |          |       |  | <i>CACNB4</i>   | Body    |
| cg26304237 | 1  | 65,730,384  | 1.53E-06 | 0.257 | 0.244 | 1.58E-28 | 0.241 |  | <i>DNAJC6</i>   | TSS200  |
| cg15006881 | 8  | 97,158,052  | 6.36E-10 | 0.257 | 0.227 |          |       |  | <i>GDF6</i>     | Body    |

|            |    |             |          |       |       |          |       |     |  |                 |         |
|------------|----|-------------|----------|-------|-------|----------|-------|-----|--|-----------------|---------|
| cg11652360 | 6  | 33,160,120  | 9.32E-05 | 0.257 | 0.231 |          |       |     |  | <i>COL11A2</i>  | 5'UTR   |
| cg20318845 | 2  | 45,237,781  | 1.69E-06 | 0.257 | 0.184 |          |       |     |  | <i>SIX2</i>     | TSS1500 |
| cg23504246 | 15 | 49,715,342  | 7.37E-07 | 0.257 | 0.256 | 4.77E-16 | 0.154 |     |  | <i>C15orf33</i> | Body    |
| cg26247508 | 10 | 82,299,669  | 8.73E-09 | 0.257 | 0.245 |          |       |     |  | <i>SH2D4B</i>   | TSS1500 |
| cg09208010 | 14 | 23,305,780  | 0.00359  | 0.257 | 0.234 |          |       | Yes |  | <i>MMP14</i>    | TSS200  |
| cg02627657 | 17 | 16,257,165  | 0.000126 | 0.257 | 0.169 |          |       |     |  | <i>CENPV</i>    | TSS1500 |
| cg12434362 | 5  | 95,419,503  | 1.18E-09 | 0.257 | 0.264 |          |       |     |  |                 |         |
| cg04555373 | 8  | 31,497,042  | 0.008954 | 0.257 | 0.243 |          |       |     |  | <i>NRG1</i>     | TSS1500 |
| cg18422268 | 15 | 66,274,767  | 0.004345 | 0.257 | 0.154 |          |       |     |  | <i>MEGF11</i>   | Body    |
| cg17177455 | 2  | 176,969,218 | 0.000513 | 0.257 | 0.274 |          |       |     |  |                 |         |
| cg23917844 | 11 | 61,314,901  | 9.71E-15 | 0.257 | 0.264 |          |       |     |  | <i>SYT7</i>     | Body    |
| cg14761454 | 11 | 108,092,087 | 0.000761 | 0.257 | 0.240 |          |       |     |  | <i>ATM</i>      | TSS1500 |
| cg10127490 | 3  | 15,563,072  | 3.26E-08 | 0.257 | 0.244 |          |       |     |  | <i>COLQ</i>     | 1stExon |
| cg13090478 | 11 | 116,706,372 | 0.028842 | 0.257 | 0.258 |          |       |     |  |                 |         |
| cg25147026 | 1  | 186,650,441 | 0.00015  | 0.257 | 0.266 |          |       |     |  | <i>PTGS2</i>    | TSS1500 |
| cg21063282 | 14 | 95,235,402  | 0.004096 | 0.257 | 0.275 |          |       |     |  | <i>GSC</i>      | Body    |
| cg09222023 | 3  | 138,669,322 | 0.019787 | 0.257 | 0.153 |          |       |     |  | <i>C3orf72</i>  | Body    |
| cg04541368 | 5  | 92,909,429  | 0.0001   | 0.257 | 0.195 |          |       |     |  | <i>FLJ42709</i> | Body    |
| cg24859433 | 6  | 30,720,203  | 2.82E-09 | 0.257 | 0.190 |          |       |     |  |                 |         |
| cg09109383 | 16 | 16,083,164  | 6.21E-11 | 0.257 | 0.261 |          |       |     |  | <i>ABCC1</i>    | Body    |
| cg00262446 | 4  | 101,439,228 | 9.18E-05 | 0.257 | 0.248 |          |       |     |  | <i>EMCN</i>     | 5'UTR   |
| cg06741112 | 14 | 97,059,243  | 5.1E-05  | 0.257 | 0.197 |          |       |     |  |                 |         |
| cg12612393 | 1  | 3,474,376   | 2.56E-08 | 0.257 | 0.248 |          |       |     |  | <i>MEGF6</i>    | Body    |
| cg16473125 | 16 | 55,090,720  | 0.032735 | 0.257 | 0.335 |          |       |     |  |                 |         |
| cg02745912 | 7  | 142,494,204 | 0.000161 | 0.257 | 0.277 |          |       |     |  |                 |         |
| cg10168149 | 2  | 200,335,558 | 3.45E-06 | 0.257 | 0.249 |          |       |     |  | <i>FLJ32063</i> | Body    |
| cg06835156 | 14 | 101,131,459 | 0.002262 | 0.257 | 0.257 |          |       |     |  | <i>C14orf70</i> | Body    |
| cg17775621 | 10 | 11,206,838  | 0.000439 | 0.257 | 0.128 |          |       |     |  | <i>CUGBP2</i>   | TSS200  |
| cg14947429 | 10 | 28,036,151  | 3.65E-07 | 0.257 | 0.277 |          |       |     |  | <i>MKX</i>      | TSS1500 |
| cg20129210 | 13 | 100,547,192 | 0.005841 | 0.257 | 0.173 |          |       |     |  | <i>CLYBL</i>    | 3'UTR   |
| cg19098796 | 3  | 183,993,726 | 0.007665 | 0.257 | 0.227 |          |       |     |  | <i>ECE2</i>     | TSS200  |
| cg27364741 | 2  | 63,281,069  | 2.12E-05 | 0.257 | 0.243 |          |       |     |  | <i>OTX1</i>     | Body    |
| cg13146674 | 11 | 68,095,623  | 0.022686 | 0.257 | 0.156 |          |       |     |  | <i>LRP5</i>     | Body    |
| cg14005211 | 2  | 171,676,925 | 5.94E-13 | 0.257 | 0.224 |          |       |     |  | <i>GAD1</i>     | Body    |

|            |    |             |          |       |       |          |       |     |  |          |         |
|------------|----|-------------|----------|-------|-------|----------|-------|-----|--|----------|---------|
| cg15774391 | 17 | 40,439,628  | 4.69E-07 | 0.257 | 0.237 |          |       |     |  | STAT5A   | 5'UTR   |
| cg04751631 | 7  | 149,917,170 | 0.000329 | 0.257 | 0.221 |          |       |     |  |          |         |
| cg07260927 | 4  | 11,428,822  | 1.4E-19  | 0.257 | 0.259 |          |       |     |  | HS3ST1   | 5'UTR   |
| cg15069906 | 20 | 55,841,888  | 0.035447 | 0.257 | 0.172 |          |       |     |  | BMP7     | TSS200  |
| cg19116429 | 10 | 93,647,563  | 0.006177 | 0.257 | 0.221 |          |       |     |  |          |         |
| cg13013900 | 17 | 6,659,326   | 0.002003 | 0.257 | 0.202 |          |       |     |  | XAF1     | 5'UTR   |
| cg05618426 | 4  | 148,401,958 | 1.95E-08 | 0.257 | 0.246 |          |       |     |  | EDNRA    | TSS200  |
| cg09513276 | 20 | 55,836,676  | 1.5E-17  | 0.257 | 0.261 |          |       |     |  | BMP7     | Body    |
| cg09740450 | 12 | 125,223,650 | 6.39E-07 | 0.257 | 0.205 |          |       |     |  |          |         |
| cg01881444 | 3  | 69,061,575  | 2.55E-07 | 0.257 | 0.287 |          |       |     |  | C3orf64  | 5'UTR   |
| cg23266968 | 14 | 105,265,793 | 3.38E-12 | 0.257 | 0.248 |          |       |     |  | ZBTB42   | TSS1500 |
| cg25431535 | 22 | 43,084,985  | 6.41E-06 | 0.257 | 0.202 |          |       |     |  |          |         |
| cg05171584 | 6  | 152,128,535 | 0.000483 | 0.257 | 0.190 |          |       |     |  | ESR1     | TSS1500 |
| cg22494725 | 22 | 38,709,636  | 4.62E-06 | 0.257 | 0.224 |          |       |     |  | CSNK1E   | Body    |
| cg06997549 | 12 | 2,944,163   | 9.44E-05 | 0.257 | 0.154 |          |       |     |  | NRIP2    | 5'UTR   |
| cg16306654 | 1  | 6,419,767   | 8.23E-13 | 0.257 | 0.238 |          |       |     |  | ACOT7    | Body    |
| cg08584759 | 10 | 11,912,126  | 3.97E-11 | 0.257 | 0.221 |          |       |     |  | C10orf47 | Body    |
| cg11701148 | 8  | 1,993,035   | 3.13E-05 | 0.257 | 0.254 | 8.32E-08 | 0.086 |     |  | MYOM2    | TSS200  |
| cg08067998 | 21 | 38,580,856  | 5.14E-15 | 0.257 | 0.250 |          |       | Yes |  | DSCR9    | TSS200  |
| cg18375642 | 1  | 171,154,475 | 1.44E-14 | 0.257 | 0.241 |          |       |     |  | FMO2     | 5'UTR   |
| cg22881914 | 14 | 52,536,147  | 0.012232 | 0.257 | 0.259 | 3.78E-23 | 0.243 |     |  | NID2     | TSS1500 |
| cg01941755 | 1  | 200,004,582 | 3.27E-05 | 0.257 | 0.263 |          |       | Yes |  | NR5A2    | Body    |
| cg17836612 | 17 | 76,976,357  | 2.97E-07 | 0.257 | 0.217 |          |       |     |  | LGALS3BP | TSS1500 |
| cg22377043 | 15 | 43,809,486  | 2.76E-05 | 0.257 | 0.238 |          |       |     |  | MAP1A    | TSS1500 |
| cg06861426 | 5  | 179,244,317 | 0.002361 | 0.256 | 0.123 |          |       |     |  | SQSTM1   | 5'UTR   |
| cg03232056 | 7  | 157,461,310 | 0.000594 | 0.256 | 0.191 |          |       |     |  | PTPRN2   | Body    |
| cg07135614 | 3  | 138,663,230 | 0.000152 | 0.256 | 0.265 |          |       |     |  | FOXL2    | 1stExon |
| cg22473846 | 5  | 38,846,743  | 0.000423 | 0.256 | 0.203 |          |       |     |  | OSMR     | 5'UTR   |
| cg18533525 | 1  | 217,581,184 | 1.22E-06 | 0.256 | 0.273 |          |       |     |  |          |         |
| cg18088242 | 15 | 45,422,325  | 0.006242 | 0.256 | 0.218 |          |       |     |  | DUOX1    | 5'UTR   |
| cg19378036 | 17 | 36,105,364  | 0.027057 | 0.256 | 0.258 |          |       |     |  | HNF1B    | TSS1500 |
| cg21571060 | 5  | 92,414,263  | 8.85E-09 | 0.256 | 0.231 |          |       |     |  |          |         |
| cg01683883 | 16 | 66,613,053  | 9.1E-09  | 0.256 | 0.242 | 6.85E-29 | 0.211 |     |  | CMTM2    | TSS1500 |
| cg21762788 | 8  | 9,756,501   | 0.020319 | 0.256 | 0.267 |          |       |     |  |          |         |



|            |    |             |          |       |       |  |  |  |                 |         |
|------------|----|-------------|----------|-------|-------|--|--|--|-----------------|---------|
| cg04922803 | 12 | 104,444,418 | 5.17E-08 | 0.256 | 0.244 |  |  |  | <i>GLT8D2</i>   | TSS1500 |
| cg03083443 | 16 | 1,969,712   | 4.58E-08 | 0.256 | 0.284 |  |  |  | <i>HS3ST6</i>   | TSS1500 |
| cg19683410 | 21 | 46,129,392  | 0.000133 | 0.256 | 0.186 |  |  |  | <i>C21orf29</i> | Body    |
| cg25735305 | 11 | 124,629,580 | 4.99E-11 | 0.256 | 0.245 |  |  |  | <i>ESAM</i>     | Body    |
| cg03398481 | 15 | 81,666,671  | 5.26E-09 | 0.256 | 0.277 |  |  |  | <i>TMC3</i>     | TSS1500 |
| cg20065768 | 16 | 29,796,685  | 9.95E-06 | 0.256 | 0.272 |  |  |  |                 |         |
| cg06109894 | 2  | 131,185,499 | 0.022213 | 0.256 | 0.331 |  |  |  |                 |         |
| cg08734477 | 6  | 7,833,720   | 4.75E-07 | 0.256 | 0.252 |  |  |  | <i>BMP6</i>     | Body    |
| cg17826834 | 15 | 96,868,857  | 2.2E-06  | 0.256 | 0.224 |  |  |  | <i>NR2F2</i>    | TSS1500 |
| cg02259384 | 3  | 58,523,373  | 3.6E-25  | 0.256 | 0.231 |  |  |  | <i>ACOX2</i>    | TSS1500 |
| cg21497082 | 6  | 31,111,270  | 3.27E-10 | 0.256 | 0.245 |  |  |  | <i>CCHCR1</i>   | Body    |
| cg22713958 | 17 | 76,976,245  | 1.47E-05 | 0.256 | 0.206 |  |  |  | <i>LGALS3BP</i> | TSS200  |
| cg11111740 | 6  | 28,584,288  | 5.6E-08  | 0.256 | 0.249 |  |  |  |                 |         |
| cg19507032 | 2  | 42,991,422  | 9.05E-14 | 0.256 | 0.264 |  |  |  | <i>OXER1</i>    | TSS200  |
| cg22641201 | 10 | 60,401,105  | 0.000834 | 0.256 | 0.169 |  |  |  | <i>BICC1</i>    | Body    |
| cg24718971 | 5  | 80,256,166  | 0.019099 | 0.256 | 0.252 |  |  |  | <i>RASGRF2</i>  | TSS1500 |
| cg00039176 | 5  | 140,753,076 | 0.013096 | 0.256 | 0.329 |  |  |  | <i>PCDHGA4</i>  | Body    |
| cg10149870 | 2  | 129,106,448 | 5.53E-12 | 0.256 | 0.272 |  |  |  |                 |         |
| cg12751644 | 20 | 60,527,061  | 6.83E-09 | 0.256 | 0.233 |  |  |  |                 |         |
| cg13654344 | Y  | 2,654,978   | 6.75E-05 | 0.256 | 0.280 |  |  |  | <i>SRY</i>      | 3'UTR   |
| cg13867255 | 9  | 138,108,675 | 0.001397 | 0.256 | 0.277 |  |  |  |                 |         |
| cg14706475 | 6  | 25,218,752  | 1.66E-09 | 0.256 | 0.230 |  |  |  |                 |         |
| cg20571592 | 3  | 40,657,387  | 2.13E-05 | 0.256 | 0.294 |  |  |  |                 |         |
| cg19567689 | 14 | 97,059,467  | 2.57E-08 | 0.256 | 0.252 |  |  |  |                 |         |
| cg18769353 | 7  | 137,028,617 | 0.013099 | 0.256 | 0.158 |  |  |  | <i>PTN</i>      | TSS200  |
| cg03521696 | 6  | 29,795,595  | 1.79E-05 | 0.256 | 0.267 |  |  |  | <i>HLA-G</i>    | 5'UTR   |
| cg02468728 | 19 | 611,107     | 0.000382 | 0.256 | 0.204 |  |  |  | <i>HCN2</i>     | Body    |
| cg07830436 | 6  | 30,419,066  | 0.003841 | 0.256 | 0.285 |  |  |  |                 |         |
| cg27622017 | 3  | 181,447,418 | 0.000444 | 0.256 | 0.262 |  |  |  | <i>SOX2OT</i>   | Body    |
| cg01499197 | 13 | 28,544,814  | 1.49E-07 | 0.256 | 0.205 |  |  |  | <i>CDX2</i>     | TSS1500 |
| cg24801587 | 7  | 155,244,101 | 0.020459 | 0.256 | 0.222 |  |  |  |                 |         |
| cg25021359 | 7  | 123,315,035 | 1.31E-11 | 0.256 | 0.269 |  |  |  |                 |         |
| cg24621437 | 10 | 108,924,560 | 0.027725 | 0.256 | 0.319 |  |  |  | <i>SORCS1</i>   | TSS1500 |
| cg15712310 | 16 | 73,100,790  | 3.68E-07 | 0.256 | 0.243 |  |  |  |                 |         |

|            |    |             |          |       |       |  |  |  |                  |         |
|------------|----|-------------|----------|-------|-------|--|--|--|------------------|---------|
| cg16105620 | 11 | 74,178,684  | 0.000803 | 0.256 | 0.212 |  |  |  | <i>KCNE3</i>     | TSS200  |
| cg08898155 | 7  | 95,026,097  | 0.007859 | 0.256 | 0.231 |  |  |  | <i>PON3</i>      | TSS1500 |
| cg02121672 | X  | 24,665,932  | 0.007994 | 0.256 | 0.228 |  |  |  | <i>PCYT1B</i>    | Body    |
| cg07575518 | 14 | 92,413,497  | 0.009327 | 0.256 | 0.281 |  |  |  | <i>FBLN5</i>     | Body    |
| cg20284239 | 1  | 168,091,000 | 2.94E-18 | 0.256 | 0.245 |  |  |  | <i>GPR161</i>    | 5'UTR   |
| cg11324832 | 3  | 181,441,806 | 3.39E-05 | 0.256 | 0.250 |  |  |  | <i>SOX20T</i>    | Body    |
| cg14711108 | 1  | 44,813,163  | 2.03E-16 | 0.256 | 0.250 |  |  |  | <i>ER13</i>      | Body    |
| cg16299576 | 8  | 10,872,819  | 0.000345 | 0.256 | 0.274 |  |  |  | <i>XKR6</i>      | Body    |
| cg18002862 | 17 | 2,718,230   | 4.06E-06 | 0.256 | 0.194 |  |  |  | <i>RAP1GAP2</i>  | Body    |
| cg23236370 | 5  | 33,892,705  | 1.34E-22 | 0.256 | 0.240 |  |  |  | <i>ADAMTS12</i>  | TSS1500 |
| cg04848137 | 8  | 38,483,364  | 8.17E-06 | 0.256 | 0.199 |  |  |  |                  |         |
| cg03669782 | 4  | 54,970,254  | 0.000451 | 0.256 | 0.252 |  |  |  |                  |         |
| cg15507690 | 3  | 176,919,597 | 2.43E-07 | 0.256 | 0.187 |  |  |  |                  |         |
| cg06544405 | 18 | 70,536,807  | 1.76E-05 | 0.256 | 0.211 |  |  |  |                  |         |
| cg19421368 | 20 | 45,280,288  | 4.22E-15 | 0.256 | 0.274 |  |  |  | <i>SLC13A3</i>   | TSS200  |
| cg11213248 | 13 | 28,534,648  | 0.010894 | 0.256 | 0.269 |  |  |  |                  |         |
| cg03316934 | 2  | 220,510,231 | 1.42E-09 | 0.256 | 0.274 |  |  |  |                  |         |
| cg11523350 | 11 | 117,171,073 | 2.4E-10  | 0.256 | 0.268 |  |  |  | <i>BACE1</i>     | Body    |
| cg05048377 | 16 | 3,237,964   | 0.02927  | 0.256 | 0.275 |  |  |  |                  |         |
| cg24452260 | 4  | 158,143,538 | 1.31E-05 | 0.256 | 0.243 |  |  |  | <i>GRIA2</i>     | Body    |
| cg01288724 | 5  | 142,575,122 | 4.93E-10 | 0.256 | 0.265 |  |  |  | <i>ARHGAP26</i>  | Body    |
| cg18557131 | 13 | 100,624,207 | 0.00284  | 0.256 | 0.235 |  |  |  | <i>ZIC5</i>      | TSS200  |
| cg13048911 | 5  | 139,691,821 | 0.000444 | 0.256 | 0.309 |  |  |  |                  |         |
| cg24601030 | 11 | 111,847,747 | 0.00513  | 0.256 | 0.205 |  |  |  | <i>DIXDC1</i>    | TSS1500 |
| cg03241461 | 10 | 29,924,258  | 5.08E-09 | 0.256 | 0.266 |  |  |  | <i>SVIL</i>      | TSS1500 |
| cg08701183 | 7  | 21,209,781  | 5.36E-09 | 0.256 | 0.260 |  |  |  |                  |         |
| cg16596440 | 4  | 140,684,596 | 0.001764 | 0.256 | 0.155 |  |  |  | <i>MAML3</i>     | Body    |
| cg14917244 | 8  | 27,469,001  | 0.000335 | 0.256 | 0.215 |  |  |  | <i>CLU</i>       | TSS200  |
| cg07585069 | 17 | 27,039,120  | 1.82E-05 | 0.256 | 0.266 |  |  |  | <i>PROCA1</i>    | TSS1500 |
| cg09398550 | 3  | 68,056,976  | 0.033585 | 0.256 | 0.297 |  |  |  | <i>FAM19A1</i>   | Body    |
| cg16002305 | 14 | 97,879,656  | 0.011618 | 0.256 | 0.333 |  |  |  |                  |         |
| cg16991515 | 6  | 27,107,019  | 1.09E-05 | 0.256 | 0.238 |  |  |  | <i>HIST1H2BK</i> | 3'UTR   |
| cg26197915 | 11 | 48,085,137  | 5.99E-08 | 0.256 | 0.282 |  |  |  | <i>PTPRJ</i>     | Body    |
| cg15867728 | 4  | 72,898,212  | 0.000126 | 0.256 | 0.223 |  |  |  | <i>NPFFR2</i>    | Body    |

|            |    |             |          |       |       |          |       |  |          |         |
|------------|----|-------------|----------|-------|-------|----------|-------|--|----------|---------|
| cg17974166 | 1  | 23,280,069  | 4.82E-08 | 0.256 | 0.257 |          |       |  |          |         |
| cg05797623 | 4  | 73,178,007  | 8.37E-10 | 0.256 | 0.254 |          |       |  | ADAMTS3  | Body    |
| cg21182196 | 14 | 95,786,801  | 0.015975 | 0.256 | 0.271 |          |       |  | CLMN     | TSS1500 |
| cg24087736 | 1  | 68,301,529  | 2.63E-17 | 0.256 | 0.263 |          |       |  |          |         |
| cg18358894 | 7  | 121,956,890 | 0.000834 | 0.256 | 0.302 |          |       |  |          |         |
| cg23233200 | 6  | 26,272,695  | 0.014932 | 0.256 | 0.331 |          |       |  | HIST1H3G | TSS1500 |
| cg26833120 | 1  | 32,169,568  | 2.08E-48 | 0.256 | 0.256 |          |       |  | COL16A1  | 1stExon |
| cg12890903 | 14 | 24,867,954  | 1.72E-10 | 0.256 | 0.218 |          |       |  | NYNRIN   | TSS200  |
| cg15123159 | 6  | 43,045,686  | 2.47E-11 | 0.256 | 0.190 |          |       |  | PTK7     | Body    |
| cg09054333 | X  | 142,723,768 | 0.019348 | 0.256 | 0.343 |          |       |  | SLITRK4  | TSS1500 |
| cg00489394 | 11 | 63,259,326  | 0.000774 | 0.256 | 0.205 |          |       |  | HRASLS5  | TSS1500 |
| cg05898452 | 7  | 55,224,863  | 3.26E-09 | 0.256 | 0.221 |          |       |  | EGFR     | Body    |
| cg22304799 | 2  | 28,877,884  | 4.91E-13 | 0.256 | 0.237 |          |       |  |          |         |
| cg00929635 | 20 | 44,035,918  | 4.19E-14 | 0.256 | 0.256 |          |       |  | DBNDD2   | 5'UTR   |
| cg04387396 | 10 | 72,593,165  | 1.33E-05 | 0.256 | 0.275 |          |       |  | SGPL1    | Body    |
| cg18793806 | 2  | 95,826,087  | 4.26E-13 | 0.256 | 0.213 | 4.19E-21 | 0.163 |  | ZNF514   | TSS1500 |
| cg25358039 | 12 | 81,471,757  | 0.017825 | 0.256 | 0.290 |          |       |  | ACSS3    | TSS200  |
| cg26117023 | 2  | 74,782,096  | 0.002057 | 0.256 | 0.278 | 4.49E-14 | 0.225 |  | LOXL3    | TSS1500 |
| cg09614479 | 10 | 81,967,536  | 6.95E-07 | 0.256 | 0.222 |          |       |  |          |         |
| cg20495737 | X  | 48,327,768  | 6.89E-05 | 0.256 | 0.201 |          |       |  | SLC38A5  | 5'UTR   |
| cg26268277 | 8  | 26,372,879  | 0.000219 | 0.256 | 0.229 |          |       |  | PNMA2    | TSS1500 |
| cg02305242 | 14 | 85,996,202  | 0.012672 | 0.256 | 0.235 |          |       |  | FLRT2    | TSS1500 |
| cg12029804 | 17 | 38,821,390  | 0.012548 | 0.256 | 0.243 |          |       |  | KRT222   | 5'UTR   |
| cg25423004 | 2  | 176,993,211 | 1.61E-06 | 0.256 | 0.228 |          |       |  | HOXD8    | TSS1500 |
| cg02619116 | 17 | 40,819,808  | 4.11E-05 | 0.256 | 0.259 |          |       |  |          |         |
| cg07918545 | 10 | 129,535,669 | 0.010185 | 0.256 | 0.245 |          |       |  | FOXI2    | 1stExon |
| cg11638071 | 17 | 56,405,967  | 9.08E-09 | 0.256 | 0.244 |          |       |  | BZRAP1   | 1stExon |
| cg21729992 | 20 | 55,200,370  | 2.78E-05 | 0.256 | 0.268 |          |       |  |          |         |
| cg01413632 | 12 | 76,078,445  | 0.014001 | 0.256 | 0.303 |          |       |  |          |         |
| cg15475650 | 10 | 120,938,899 | 7.91E-06 | 0.256 | 0.228 |          |       |  | PRDX3    | TSS1500 |
| cg20059140 | 18 | 11,751,516  | 0.011732 | 0.256 | 0.286 |          |       |  | GNAL     | TSS200  |
| cg01022200 | 1  | 180,881,086 | 0.000389 | 0.255 | 0.220 |          |       |  | KIAA1614 | TSS1500 |
| cg25668058 | 12 | 115,183,175 | 8.31E-24 | 0.255 | 0.239 |          |       |  |          |         |
| cg02495310 | 5  | 134,366,831 | 0.008862 | 0.255 | 0.330 |          |       |  | PITX1    | Body    |

|            |    |             |          |       |       |  |  |     |                  |         |
|------------|----|-------------|----------|-------|-------|--|--|-----|------------------|---------|
| cg06192866 | 12 | 89,748,300  | 0.003438 | 0.255 | 0.280 |  |  |     |                  |         |
| cg26248114 | 1  | 56,901,693  | 5.8E-10  | 0.255 | 0.241 |  |  |     |                  |         |
| cg10110083 | 6  | 30,418,845  | 0.001236 | 0.255 | 0.316 |  |  |     |                  |         |
| cg20705893 | 7  | 157,869,970 | 2.95E-09 | 0.255 | 0.238 |  |  |     | <i>PTPRN2</i>    | Body    |
| cg01488770 | 17 | 59,474,078  | 9.41E-07 | 0.255 | 0.247 |  |  |     |                  |         |
| cg16209444 | 3  | 58,522,771  | 7.9E-19  | 0.255 | 0.246 |  |  |     | <i>ACOX2</i>     | 5'UTR   |
| cg25762679 | 1  | 101,185,311 | 0.01187  | 0.255 | 0.221 |  |  |     | <i>VCAM1</i>     | 1stExon |
| cg06813578 | 15 | 51,386,254  | 0.001182 | 0.255 | 0.255 |  |  |     | <i>TNFAIP8L3</i> | Body    |
| cg11141652 | 22 | 24,348,549  | 0.029738 | 0.255 | 0.002 |  |  |     | <i>GSTTP1</i>    | TSS1500 |
| cg13031171 | 13 | 29,106,870  | 0.000453 | 0.255 | 0.221 |  |  |     |                  |         |
| cg05248655 | 10 | 1,454,265   | 2.12E-13 | 0.255 | 0.224 |  |  |     | <i>ADARB2</i>    | Body    |
| cg16704560 | 2  | 15,777,810  | 1.08E-21 | 0.255 | 0.248 |  |  | Yes |                  |         |
| cg03606772 | 1  | 152,487,856 | 0.001275 | 0.255 | 0.272 |  |  |     | <i>CRCT1</i>     | 5'UTR   |
| cg20790648 | 3  | 151,619,923 | 4.79E-12 | 0.255 | 0.243 |  |  |     |                  |         |
| cg07725206 | 1  | 85,251,175  | 1.43E-16 | 0.255 | 0.234 |  |  |     |                  |         |
| cg22430861 | 17 | 55,584,079  | 1.15E-07 | 0.255 | 0.254 |  |  |     | <i>MSI2</i>      | Body    |
| cg23637494 | 3  | 138,663,400 | 0.002248 | 0.255 | 0.262 |  |  |     | <i>FOXL2</i>     | 1stExon |
| cg06221393 | 5  | 139,089,315 | 2.49E-07 | 0.255 | 0.250 |  |  |     |                  |         |
| cg11285496 | 5  | 81,882,123  | 0.000268 | 0.255 | 0.222 |  |  |     |                  |         |
| cg12272369 | 10 | 95,848,841  | 8.7E-05  | 0.255 | 0.235 |  |  |     | <i>PLCE1</i>     | Body    |
| cg07046818 | 8  | 97,166,291  | 2E-07    | 0.255 | 0.257 |  |  |     | <i>GDF6</i>      | Body    |
| cg19610869 | 5  | 157,098,619 | 4.02E-05 | 0.255 | 0.213 |  |  |     | <i>C5orf52</i>   | 5'UTR   |
| cg22301854 | 4  | 8,081,109   | 0.000416 | 0.255 | 0.243 |  |  |     | <i>ABLIM2</i>    | Body    |
| cg20260721 | 15 | 63,245,298  | 1.7E-11  | 0.255 | 0.249 |  |  |     |                  |         |
| cg22974982 | 12 | 30,323,251  | 0.000787 | 0.255 | 0.207 |  |  |     |                  |         |
| cg09735465 | 9  | 120,507,228 | 4.18E-07 | 0.255 | 0.225 |  |  |     |                  |         |
| cg23783653 | 6  | 27,059,850  | 0.014013 | 0.255 | 0.238 |  |  |     |                  |         |
| cg26695445 | 16 | 87,902,677  | 0.005701 | 0.255 | 0.291 |  |  |     | <i>SLC7A5</i>    | 1stExon |
| cg26979473 | 7  | 137,028,389 | 0.009359 | 0.255 | 0.167 |  |  |     | <i>PTN</i>       | 5'UTR   |
| cg20934596 | 22 | 31,481,480  | 0.019191 | 0.255 | 0.069 |  |  |     | <i>SMTN</i>      | Body    |
| cg06193578 | 19 | 35,396,475  | 0.010468 | 0.255 | 0.261 |  |  |     |                  |         |
| cg06948222 | 16 | 87,958,493  | 5.05E-08 | 0.255 | 0.218 |  |  |     | <i>CA5A</i>      | Body    |
| cg07905054 | 12 | 102,272,136 | 1.71E-09 | 0.255 | 0.244 |  |  |     | <i>DRAM1</i>     | Body    |
| cg18612461 | 15 | 75,251,733  | 7.91E-07 | 0.255 | 0.210 |  |  |     |                  |         |

|            |    |             |          |       |       |           |       |  |                |         |
|------------|----|-------------|----------|-------|-------|-----------|-------|--|----------------|---------|
| cg21279510 | 1  | 8,277,627   | 0.015607 | 0.255 | 0.189 |           |       |  |                |         |
| cg22430700 | 1  | 180,511,495 | 5.64E-14 | 0.255 | 0.251 |           |       |  |                |         |
| cg19084031 | 15 | 38,361,362  | 0.000165 | 0.255 | 0.193 |           |       |  |                |         |
| cg07961994 | 4  | 93,227,195  | 0.042568 | 0.255 | 0.156 |           |       |  | <i>GRID2</i>   | Body    |
| cg02448597 | 6  | 32,160,605  | 1.67E-07 | 0.255 | 0.204 |           |       |  | <i>GPSM3</i>   | 5'UTR   |
| cg08537783 | 1  | 10,795,394  | 9.2E-14  | 0.255 | 0.261 |           |       |  | <i>CASZ1</i>   | 5'UTR   |
| cg20699586 | 1  | 227,748,719 | 1.27E-13 | 0.255 | 0.247 |           |       |  |                |         |
| cg25330016 | 17 | 77,030,281  | 2.01E-08 | 0.255 | 0.213 |           |       |  | <i>C1QTNF1</i> | TSS200  |
| cg01192077 | 5  | 158,523,507 | 0.004286 | 0.255 | 0.269 |           |       |  | <i>EBF1</i>    | Body    |
| cg00418027 | 9  | 96,716,998  | 4.8E-05  | 0.255 | 0.307 |           |       |  | <i>BARX1</i>   | Body    |
| cg13169132 | 1  | 1,362,340   | 3.63E-07 | 0.255 | 0.238 |           |       |  | <i>TMEM88B</i> | Body    |
| cg22193276 | 2  | 11,965,198  | 7.21E-18 | 0.255 | 0.246 |           |       |  | <i>LPIN1</i>   | 3'UTR   |
| cg01897496 | 2  | 182,545,209 | 7.42E-06 | 0.255 | 0.234 |           |       |  | <i>NEUROD1</i> | 1stExon |
| cg02611848 | 2  | 74,875,387  | 3.71E-07 | 0.255 | 0.241 |           |       |  | <i>C2orf65</i> | TSS1500 |
| cg03465028 | 15 | 31,658,323  | 0.04999  | 0.255 | 0.225 |           |       |  | <i>KLF13</i>   | Body    |
| cg09278107 | 14 | 105,779,826 | 2.83E-22 | 0.255 | 0.239 |           |       |  | <i>PACS2</i>   | TSS1500 |
| cg09670128 | 12 | 52,627,047  | 0.042797 | 0.255 | 0.310 |           |       |  | <i>KRT7</i>    | 5'UTR   |
| cg00419094 | 12 | 106,480,579 | 5.9E-58  | 0.255 | 0.255 |           |       |  | <i>NUAK1</i>   | Body    |
| cg19856897 | 7  | 142,495,846 | 7.95E-05 | 0.255 | 0.265 |           |       |  |                |         |
| cg20747577 | 7  | 26,897,253  | 2.15E-07 | 0.255 | 0.239 |           |       |  | <i>SKAP2</i>   | Body    |
| cg25382400 | 3  | 181,445,514 | 4.52E-05 | 0.255 | 0.233 |           |       |  | <i>SOX2OT</i>  | Body    |
| cg17759274 | 19 | 39,260,954  | 1.57E-08 | 0.255 | 0.246 |           |       |  |                |         |
| cg08660915 | 22 | 50,523,790  | 1.34E-07 | 0.255 | 0.225 |           |       |  | <i>MLC1</i>    | 1stExon |
| cg17710779 | 10 | 123,356,331 | 0.000956 | 0.255 | 0.275 |           |       |  | <i>FGFR2</i>   | 5'UTR   |
| cg18430555 | 5  | 170,740,937 | 0.03307  | 0.255 | 0.262 |           |       |  |                |         |
| cg20432960 | 6  | 50,804,174  | 0.000547 | 0.255 | 0.266 |           |       |  | <i>TFAP2B</i>  | Body    |
| cg05924583 | 1  | 3,569,624   | 1.9E-06  | 0.255 | 0.213 | 0.0000146 | 0.082 |  | <i>TP73</i>    | 5'UTR   |
| cg10159630 | 2  | 177,037,364 | 7.96E-07 | 0.255 | 0.204 |           |       |  | <i>HOXD3</i>   | 3'UTR   |
| cg13321164 | 10 | 48,416,781  | 2.86E-12 | 0.255 | 0.243 |           |       |  | <i>GDF2</i>    | 5'UTR   |
| cg19566405 | 17 | 33,759,965  | 0.039427 | 0.255 | 0.181 |           |       |  | <i>SLFN12</i>  | TSS1500 |
| cg22031614 | 15 | 76,628,424  | 0.001819 | 0.255 | 0.247 |           |       |  | <i>ISL2</i>    | TSS1500 |
| cg22005990 | 17 | 46,659,939  | 2.17E-06 | 0.255 | 0.219 |           |       |  |                |         |
| cg06819923 | 16 | 21,214,508  | 8.96E-11 | 0.255 | 0.265 |           |       |  | <i>ZP2</i>     | Body    |
| cg17157725 | 22 | 45,667,757  | 5.74E-12 | 0.255 | 0.234 |           |       |  |                |         |

|            |    |             |          |       |       |          |       |  |                 |         |
|------------|----|-------------|----------|-------|-------|----------|-------|--|-----------------|---------|
| cg09233651 | 12 | 114,838,567 | 0.002762 | 0.255 | 0.249 |          |       |  | <i>TBX5</i>     | Body    |
| cg09916783 | 2  | 25,391,911  | 6.68E-06 | 0.255 | 0.206 |          |       |  | <i>POMC</i>     | TSS1500 |
| cg13021619 | 8  | 23,563,859  | 0.00134  | 0.255 | 0.251 |          |       |  | <i>NKX2-6</i>   | 1stExon |
| cg17729667 | 20 | 25,566,382  | 0.005057 | 0.255 | 0.140 | 6.58E-26 | 0.188 |  | <i>NINL</i>     | TSS1500 |
| cg06705122 | 19 | 49,371,079  | 3.86E-05 | 0.255 | 0.273 |          |       |  | <i>PLEKHA4</i>  | 5'UTR   |
| cg07451803 | 5  | 53,927,032  | 1.69E-14 | 0.255 | 0.254 |          |       |  |                 |         |
| cg08678044 | 19 | 51,226,849  | 0.006968 | 0.255 | 0.350 |          |       |  | <i>CLEC11A</i>  | 1stExon |
| cg11231751 | 19 | 2,302,783   | 1.02E-07 | 0.255 | 0.268 |          |       |  | <i>LINGO3</i>   | 5'UTR   |
| cg19451673 | 12 | 48,398,730  | 0.020566 | 0.255 | 0.119 |          |       |  | <i>COL2A1</i>   | TSS1500 |
| cg27248029 | 17 | 71,039,644  | 2.17E-05 | 0.255 | 0.195 |          |       |  | <i>SLC39A11</i> | Body    |
| cg24399540 | 2  | 207,307,150 | 0.000186 | 0.255 | 0.237 |          |       |  | <i>ADAM23</i>   | TSS1500 |
| cg25611057 | 3  | 197,121,419 | 1E-14    | 0.255 | 0.211 |          |       |  |                 |         |
| cg05720261 | 1  | 40,105,304  | 0.018909 | 0.255 | 0.277 |          |       |  | <i>HEYL</i>     | 1stExon |
| cg12526997 | 2  | 242,974,096 | 9.06E-09 | 0.255 | 0.218 |          |       |  |                 |         |
| cg26209005 | 7  | 132,262,526 | 0.001716 | 0.255 | 0.184 |          |       |  | <i>PLXNA4</i>   | TSS1500 |
| cg04477962 | 12 | 51,317,375  | 7.03E-17 | 0.255 | 0.253 |          |       |  | <i>METTL7A</i>  | TSS1500 |
| cg06232807 | 16 | 51,185,132  | 0.00063  | 0.255 | 0.196 |          |       |  | <i>SALL1</i>    | TSS1500 |
| cg04311403 | 1  | 236,559,646 | 0.01453  | 0.255 | 0.062 |          |       |  | <i>EDARADD</i>  | Body    |
| cg26202753 | 7  | 1,850,203   | 1.09E-13 | 0.255 | 0.255 |          |       |  |                 |         |
| cg26251506 | 7  | 96,642,163  | 4.08E-06 | 0.255 | 0.249 |          |       |  | <i>DLX6AS</i>   | Body    |
| cg03922126 | 6  | 73,330,297  | 0.010275 | 0.255 | 0.299 |          |       |  | <i>KCNQ5</i>    | TSS1500 |
| cg17491622 | 1  | 1,369,616   | 0.001079 | 0.255 | 0.158 |          |       |  | <i>VWA1</i>     | TSS1500 |
| cg04032066 | 11 | 20,622,721  | 0.000734 | 0.255 | 0.296 |          |       |  | <i>SLC6A5</i>   | Body    |
| cg12390344 | 18 | 21,270,348  | 1.32E-05 | 0.255 | 0.224 |          |       |  | <i>LAMA3</i>    | Body    |
| cg12501761 | 2  | 240,898,385 | 8.43E-20 | 0.255 | 0.232 |          |       |  | <i>NDUFA10</i>  | 3'UTR   |
| cg19722748 | 7  | 96,627,700  | 0.00845  | 0.255 | 0.310 |          |       |  | <i>DLX6AS</i>   | Body    |
| cg21106407 | 14 | 57,262,177  | 0.000878 | 0.255 | 0.251 |          |       |  |                 |         |
| cg27406678 | 4  | 85,417,612  | 0.0073   | 0.255 | 0.266 |          |       |  | <i>NKX6-1</i>   | Body    |
| cg24181771 | 6  | 28,706,472  | 0.044702 | 0.255 | 0.241 |          |       |  |                 |         |
| cg07102229 | 12 | 47,219,958  | 4.91E-11 | 0.255 | 0.234 |          |       |  | <i>SLC38A4</i>  | TSS200  |
| cg08473660 | 8  | 61,777,765  | 5.11E-07 | 0.255 | 0.231 |          |       |  | <i>CHD7</i>     | Body    |
| cg13761949 | 10 | 35,098,359  | 0.003415 | 0.255 | 0.156 |          |       |  | <i>PARD3</i>    | Body    |
| cg17949727 | 1  | 38,412,684  | 1.29E-05 | 0.255 | 0.248 |          |       |  | <i>INPP5B</i>   | 5'UTR   |
| cg00044995 | 19 | 408,683     | 0.000305 | 0.255 | 0.244 |          |       |  | <i>C2CD4C</i>   | 5'UTR   |

|            |    |             |          |       |       |            |       |  |                  |         |
|------------|----|-------------|----------|-------|-------|------------|-------|--|------------------|---------|
| cg01824969 | 8  | 67,875,261  | 0.001207 | 0.255 | 0.318 |            |       |  |                  |         |
| cg02921624 | 19 | 35,068,788  | 1.19E-05 | 0.255 | 0.203 |            |       |  | <i>LOC643719</i> | TSS200  |
| cg14190534 | 14 | 90,848,416  | 1.71E-06 | 0.255 | 0.220 |            |       |  |                  |         |
| cg20945055 | 17 | 836,474     | 2.65E-08 | 0.255 | 0.260 |            |       |  | <i>NXN</i>       | Body    |
| cg08136809 | 19 | 41,882,642  | 0.003352 | 0.255 | 0.150 |            |       |  | <i>TMEM91</i>    | 1stExon |
| cg09855140 | 13 | 100,004,097 | 5.88E-14 | 0.255 | 0.247 |            |       |  | <i>UBAC2</i>     | Body    |
| cg08839210 | 17 | 27,045,048  | 0.000103 | 0.255 | 0.236 |            |       |  | <i>RAB34</i>     | TSS200  |
| cg08698854 | 7  | 134,575,306 | 3.41E-16 | 0.255 | 0.253 |            |       |  | <i>CALD1</i>     | TSS1500 |
| cg15177359 | 17 | 73,840,750  | 5.6E-20  | 0.255 | 0.281 | 5.46E-38   | 0.161 |  | <i>UNC13D</i>    | 5'UTR   |
| cg19954017 | 17 | 80,333,257  | 0.000423 | 0.255 | 0.278 |            |       |  | <i>UTS2R</i>     | 1stExon |
| cg04221461 | 1  | 243,877,024 | 4.1E-15  | 0.255 | 0.230 |            |       |  | <i>AKT3</i>      | Body    |
| cg15291243 | 17 | 35,298,199  | 0.00191  | 0.255 | 0.242 |            |       |  | <i>LHX1</i>      | Body    |
| cg03517776 | 2  | 64,834,430  | 0.00217  | 0.255 | 0.265 |            |       |  |                  |         |
| cg17990365 | 11 | 319,718     | 5.02E-06 | 0.255 | 0.179 |            |       |  | <i>IFITM3</i>    | 3'UTR   |
| cg17567560 | 10 | 105,036,863 | 0.00836  | 0.255 | 0.104 |            |       |  | <i>INA</i>       | TSS200  |
| cg13175329 | 6  | 25,035,073  | 5.15E-05 | 0.255 | 0.270 |            |       |  |                  |         |
| cg16675485 | 2  | 6,055,439   | 3.68E-22 | 0.255 | 0.239 |            |       |  |                  |         |
| cg16379716 | 15 | 75,965,427  | 3.03E-13 | 0.255 | 0.202 |            |       |  |                  |         |
| cg03589296 | 2  | 66,666,292  | 2.48E-06 | 0.255 | 0.250 |            |       |  | <i>MEIS1</i>     | Body    |
| cg09136878 | 1  | 236,135,584 | 3.1E-06  | 0.255 | 0.241 |            |       |  |                  |         |
| cg11643510 | 2  | 16,124,837  | 8.15E-14 | 0.255 | 0.221 |            |       |  |                  |         |
| cg01120165 | 22 | 50,690,152  | 0.000722 | 0.255 | 0.316 | 4.12E-08   | 0.128 |  | <i>HDAC10</i>    | TSS1500 |
| cg19598293 | 7  | 117,854,765 | 0.003563 | 0.255 | 0.241 |            |       |  |                  |         |
| cg15111495 | 3  | 112,951,743 | 6.09E-06 | 0.255 | 0.236 |            |       |  | <i>BOC</i>       | 5'UTR   |
| cg18358723 | 5  | 87,955,618  | 2.17E-06 | 0.255 | 0.246 |            |       |  | <i>LOC645323</i> | Body    |
| cg20432507 | 20 | 21,689,861  | 0.000313 | 0.255 | 0.269 |            |       |  | <i>PAX1</i>      | Body    |
| cg03475182 | 11 | 110,581,454 | 0.007079 | 0.254 | 0.281 |            |       |  | <i>ARHGAP20</i>  | Body    |
| cg08655206 | 1  | 221,058,198 | 1.05E-17 | 0.254 | 0.235 |            |       |  | <i>HLX</i>       | 3'UTR   |
| cg11009817 | 5  | 101,632,372 | 0.017135 | 0.254 | 0.187 |            |       |  | <i>SLCO4C1</i>   | TSS200  |
| cg16655240 | 20 | 32,857,072  | 0.000171 | 0.254 | 0.167 |            |       |  | <i>ASIP</i>      | 3'UTR   |
| cg03793270 | 11 | 89,224,684  | 2.12E-12 | 0.254 | 0.273 |            |       |  | <i>NOX4</i>      | 5'UTR   |
| cg13462129 | 7  | 96,651,281  | 6.99E-08 | 0.254 | 0.241 | 0.00000213 | 0.099 |  | <i>DLX5</i>      | Body    |
| cg06809252 | 1  | 110,612,044 | 5.46E-09 | 0.254 | 0.223 |            |       |  | <i>ALX3</i>      | Body    |
| cg17566175 | 6  | 56,389,866  | 0.001104 | 0.254 | 0.236 |            |       |  | <i>DST</i>       | Body    |

|            |    |             |          |       |       |          |       |     |                |         |
|------------|----|-------------|----------|-------|-------|----------|-------|-----|----------------|---------|
| cg19084508 | 5  | 150,530,152 | 1.15E-06 | 0.254 | 0.235 |          |       |     | <i>ANXA6</i>   | 5'UTR   |
| cg21451998 | 1  | 110,198,240 | 1.35E-05 | 0.254 | 0.274 |          |       |     | <i>GSTM4</i>   | TSS1500 |
| cg23866687 | 11 | 96,026,956  | 6.56E-07 | 0.254 | 0.278 |          |       |     | <i>MAML2</i>   | Body    |
| cg10576051 | 15 | 73,661,652  | 5.01E-05 | 0.254 | 0.265 |          |       |     | <i>HCN4</i>    | TSS200  |
| cg19709355 | 17 | 38,504,102  | 2.34E-12 | 0.254 | 0.269 |          |       |     | <i>RARA</i>    | Body    |
| cg27425146 | 1  | 25,062,925  | 4.77E-12 | 0.254 | 0.266 |          |       |     |                |         |
| cg06316886 | 2  | 177,027,043 | 0.026105 | 0.254 | 0.265 |          |       |     |                |         |
| cg16336436 | 14 | 76,178,685  | 8.5E-20  | 0.254 | 0.259 |          |       |     | <i>TLL5</i>    | Body    |
| cg03292222 | 5  | 170,734,312 | 0.00626  | 0.254 | 0.155 |          |       |     |                |         |
| cg03816707 | 20 | 43,726,544  | 4.69E-07 | 0.254 | 0.283 |          |       |     | <i>KCNS1</i>   | Body    |
| cg10386298 | 1  | 221,050,491 | 9.59E-06 | 0.254 | 0.248 |          |       |     |                |         |
| cg25306277 | 1  | 200,003,267 | 1.01E-10 | 0.254 | 0.237 |          |       |     | <i>NR5A2</i>   | Body    |
| cg00324097 | 17 | 75,446,549  | 0.006116 | 0.254 | 0.143 |          |       |     | <i>SEPT9</i>   | TSS200  |
| cg02392696 | 12 | 52,258,264  | 0.00248  | 0.254 | 0.250 |          |       |     |                |         |
| cg06513247 | 17 | 75,446,661  | 0.002102 | 0.254 | 0.152 |          |       |     | <i>SEPT9</i>   | 1stExon |
| cg00794881 | 1  | 19,043,573  | 5.45E-07 | 0.254 | 0.222 |          |       |     | <i>PAX7</i>    | Body    |
| cg03494430 | 16 | 2,177,269   | 1.14E-09 | 0.254 | 0.260 |          |       |     | <i>PKD1</i>    | Body    |
| cg05990080 | 3  | 37,965,818  | 2.36E-23 | 0.254 | 0.241 |          |       |     | <i>CTDSPL</i>  | Body    |
| cg19452248 | 5  | 143,883,482 | 0.003073 | 0.254 | 0.204 |          |       |     |                |         |
| cg19096571 | 7  | 129,423,354 | 2.12E-05 | 0.254 | 0.252 |          |       |     |                |         |
| cg21885107 | 14 | 73,712,289  | 1.29E-09 | 0.254 | 0.231 |          |       |     | <i>PAPLN</i>   | Body    |
| cg25729445 | 6  | 29,595,347  | 7.64E-12 | 0.254 | 0.260 |          |       |     | <i>GABBR1</i>  | Body    |
| cg27606396 | 2  | 113,542,117 | 2.5E-06  | 0.254 | 0.302 |          |       |     | <i>IL1A</i>    | 1stExon |
| cg09126636 | 1  | 113,265,753 | 4.89E-14 | 0.254 | 0.234 |          |       |     | <i>FAM19A3</i> | Body    |
| cg16365445 | 10 | 33,230,686  | 9.19E-16 | 0.254 | 0.248 |          |       |     | <i>ITGB1</i>   | 5'UTR   |
| cg01826117 | 16 | 85,181,279  | 4.75E-13 | 0.254 | 0.244 |          |       |     |                |         |
| cg05531482 | 7  | 124,430,753 | 0.000388 | 0.254 | 0.288 |          |       |     |                |         |
| cg13997435 | 1  | 153,538,406 | 1.8E-11  | 0.254 | 0.262 | 3.99E-32 | 0.186 |     | <i>S100A2</i>  | TSS200  |
| cg06611810 | 19 | 41,317,067  | 0.007807 | 0.254 | 0.271 |          |       |     |                |         |
| cg01192745 | 3  | 31,239,040  | 0.000243 | 0.254 | 0.180 |          |       |     |                |         |
| cg10293403 | 6  | 10,421,670  | 5.92E-06 | 0.254 | 0.256 |          |       |     |                |         |
| cg13485230 | 18 | 9,709,310   | 3.05E-06 | 0.254 | 0.247 |          |       |     | <i>RAB31</i>   | Body    |
| cg04612444 | 8  | 57,358,713  | 0.000724 | 0.254 | 0.219 |          |       |     | <i>PENK</i>    | 5'UTR   |
| cg05267204 | 2  | 55,360,999  | 0.000204 | 0.254 | 0.221 |          |       | Yes |                |         |



|            |    |             |          |       |       |  |  |     |           |         |
|------------|----|-------------|----------|-------|-------|--|--|-----|-----------|---------|
| cg10583893 | 19 | 53,039,743  | 1.18E-05 | 0.254 | 0.237 |  |  |     | ZNF808    | 5'UTR   |
| cg15603424 | 11 | 13,300,592  | 7.3E-07  | 0.254 | 0.259 |  |  |     | ARNTL     | 5'UTR   |
| cg17646820 | 3  | 66,848,679  | 6.2E-07  | 0.254 | 0.226 |  |  |     |           |         |
| cg05893709 | 8  | 39,836,064  | 0.010953 | 0.254 | 0.105 |  |  |     | IDO2      | Body    |
| cg25516803 | 3  | 42,307,519  | 5.42E-07 | 0.254 | 0.266 |  |  |     | CCK       | TSS1500 |
| cg15454726 | 1  | 241,587,609 | 0.004649 | 0.254 | 0.313 |  |  |     |           |         |
| cg14970046 | 5  | 1,880,021   | 1.47E-05 | 0.254 | 0.225 |  |  |     | IRX4      | Body    |
| cg20557801 | 15 | 68,121,177  | 0.001389 | 0.254 | 0.192 |  |  |     | LBXCOR1   | Body    |
| cg09728102 | 5  | 66,124,492  | 0.008831 | 0.254 | 0.070 |  |  |     | MAST4     | TSS200  |
| cg24329557 | 6  | 10,882,326  | 1.93E-05 | 0.254 | 0.252 |  |  |     | GCM2      | TSS1500 |
| cg19468029 | 3  | 46,854,231  | 0.010744 | 0.254 | 0.220 |  |  |     |           |         |
| cg26299169 | 13 | 28,498,956  | 0.030443 | 0.254 | 0.322 |  |  |     | PDX1      | 3'UTR   |
| cg01323148 | 2  | 206,551,212 | 0.003488 | 0.254 | 0.259 |  |  |     | NRP2      | Body    |
| cg04764624 | 17 | 29,718,129  | 2.8E-09  | 0.254 | 0.231 |  |  |     | RAB11FIP4 | TSS1500 |
| cg06622408 | 15 | 89,952,299  | 0.001259 | 0.254 | 0.296 |  |  |     |           |         |
| cg13814351 | 9  | 136,446,836 | 1.65E-18 | 0.254 | 0.241 |  |  |     | FAM163B   | TSS1500 |
| cg16112276 | 11 | 58,806,952  | 3.12E-14 | 0.254 | 0.236 |  |  | Yes |           |         |
| cg04193065 | 15 | 31,528,995  | 4.31E-06 | 0.254 | 0.264 |  |  |     |           |         |
| cg04332927 | 6  | 44,039,484  | 1.37E-05 | 0.254 | 0.248 |  |  |     |           |         |
| cg04589008 | 2  | 660,692     | 1.05E-14 | 0.254 | 0.240 |  |  |     |           |         |
| cg07791490 | 8  | 99,949,391  | 5.53E-08 | 0.254 | 0.265 |  |  |     |           |         |
| cg26635451 | 12 | 89,749,142  | 1.36E-10 | 0.254 | 0.249 |  |  |     |           |         |
| cg23164203 | 6  | 28,367,475  | 0.004776 | 0.254 | 0.226 |  |  |     | ZSCAN12   | Body    |
| cg05516272 | 11 | 66,311,334  | 2.74E-20 | 0.254 | 0.254 |  |  |     | ZDHC24    | Body    |
| cg17827017 | 1  | 208,333,467 | 1.05E-17 | 0.254 | 0.236 |  |  |     | PLXNA2    | Body    |
| cg23858410 | 22 | 46,276,678  | 0.001526 | 0.254 | 0.269 |  |  |     |           |         |
| cg18359530 | 5  | 77,945,219  | 0.007301 | 0.254 | 0.191 |  |  |     | LHFPL2    | TSS1500 |
| cg26302986 | 7  | 90,291,360  | 7.09E-17 | 0.254 | 0.239 |  |  |     |           |         |
| cg27140872 | 5  | 147,162,461 | 0.000973 | 0.254 | 0.231 |  |  |     | JAKMIP2   | TSS1500 |
| cg12110262 | 10 | 94,827,200  | 8.3E-11  | 0.254 | 0.240 |  |  |     | CYP26C1   | Body    |
| cg27346528 | 17 | 44,896,212  | 0.00645  | 0.254 | 0.337 |  |  |     | WNT3      | TSS200  |
| cg08977270 | 3  | 158,450,833 | 6.11E-18 | 0.254 | 0.257 |  |  |     | RARRES1   | TSS1500 |
| cg25825506 | 7  | 96,626,659  | 0.001767 | 0.254 | 0.235 |  |  |     | DLX6AS    | Body    |
| cg24952328 | 19 | 19,383,704  | 0.000297 | 0.254 | 0.127 |  |  |     | TM6SF2    | Body    |

|            |    |             |          |       |       |          |       |  |          |         |
|------------|----|-------------|----------|-------|-------|----------|-------|--|----------|---------|
| cg04722391 | 7  | 137,032,114 | 0.005054 | 0.254 | 0.198 |          |       |  |          |         |
| cg18310639 | 1  | 223,904,225 | 4.54E-12 | 0.254 | 0.235 |          |       |  | CAPN2    | Body    |
| cg25432738 | 13 | 21,009,861  | 2.39E-18 | 0.254 | 0.213 |          |       |  | CRYL1    | Body    |
| cg00808648 | 14 | 105,779,910 | 1.44E-09 | 0.254 | 0.265 |          |       |  | PACS2    | TSS1500 |
| cg19086540 | 11 | 36,397,458  | 3.28E-05 | 0.254 | 0.269 |          |       |  | PRR5L    | 5'UTR   |
| cg25509871 | 19 | 40,871,557  | 0.004943 | 0.254 | 0.267 |          |       |  | PLD3     | 5'UTR   |
| cg27599211 | 12 | 117,483,006 | 1.14E-09 | 0.254 | 0.181 |          |       |  | TESC     | Body    |
| cg01639898 | 1  | 32,083,012  | 9.83E-09 | 0.254 | 0.229 |          |       |  | HCRTR1   | TSS1500 |
| cg21504624 | 9  | 34,653,580  | 1.13E-22 | 0.254 | 0.241 | 5.53E-28 | 0.151 |  | IL11RA   | 5'UTR   |
| cg07611334 | 20 | 327,811     | 0.035891 | 0.254 | 0.034 | 1.79E-15 | 0.192 |  | NRSN2    | 5'UTR   |
| cg02627216 | 17 | 38,599,056  | 4.07E-12 | 0.254 | 0.254 |          |       |  | IGFBP4   | TSS1500 |
| cg03428047 | 4  | 140,730,656 | 8.23E-09 | 0.254 | 0.257 |          |       |  | MAML3    | Body    |
| cg06065125 | 4  | 85,402,870  | 0.001701 | 0.254 | 0.236 |          |       |  |          |         |
| cg06478886 | 5  | 135,416,029 | 1.94E-05 | 0.254 | 0.195 |          |       |  |          |         |
| cg07207982 | 6  | 34,984,930  | 0.002187 | 0.254 | 0.197 |          |       |  | ANKS1A   | Body    |
| cg07958387 | 5  | 172,069,173 | 2.09E-07 | 0.254 | 0.225 |          |       |  | NEURL1B  | Body    |
| cg12307840 | 1  | 223,538,334 | 0.000905 | 0.254 | 0.137 |          |       |  | SUSD4    | TSS1500 |
| cg10204320 | 1  | 32,708,276  | 4.32E-11 | 0.254 | 0.253 |          |       |  | MTMR9L   | TSS1500 |
| cg14565781 | 1  | 45,274,513  | 2.43E-09 | 0.254 | 0.253 |          |       |  | BTBD19   | 1stExon |
| cg17075998 | X  | 40,104,353  | 1.55E-09 | 0.254 | 0.243 |          |       |  |          |         |
| cg14786652 | 1  | 1,109,192   | 0.012457 | 0.254 | 0.292 |          |       |  | TTLL10   | TSS200  |
| cg18346576 | 2  | 27,938,071  | 4.03E-15 | 0.254 | 0.255 |          |       |  |          |         |
| cg03546235 | 10 | 102,590,290 | 1.35E-06 | 0.254 | 0.244 |          |       |  |          |         |
| cg24292235 | 12 | 8,171,463   | 0.003238 | 0.254 | 0.282 |          |       |  |          |         |
| cg00695799 | 6  | 149,803,087 | 8.08E-09 | 0.254 | 0.242 |          |       |  | ZC3H12D  | 5'UTR   |
| cg07202214 | 11 | 76,381,081  | 1.54E-08 | 0.254 | 0.230 |          |       |  | LRRC32   | 5'UTR   |
| cg09450063 | 13 | 108,922,504 | 1.56E-06 | 0.254 | 0.232 |          |       |  | TNFSF13B | 1stExon |
| cg02362103 | 1  | 119,532,773 | 6.62E-09 | 0.254 | 0.287 |          |       |  | TBX15    | TSS1500 |
| cg07389611 | 17 | 59,540,267  | 2.31E-05 | 0.254 | 0.193 |          |       |  | TBX4     | Body    |
| cg09066326 | 5  | 140,753,415 | 0.027628 | 0.254 | 0.329 |          |       |  | PCDHGA4  | Body    |
| cg17919966 | 15 | 78,384,712  | 2.36E-14 | 0.254 | 0.241 |          |       |  | SH2D7    | TSS1500 |
| cg08878323 | 7  | 96,652,464  | 0.002213 | 0.254 | 0.233 | 1.31E-16 | 0.157 |  | DLX5     | Body    |
| cg12798157 | 1  | 19,600,719  | 4.47E-05 | 0.254 | 0.227 |          |       |  | AKR7L    | TSS200  |
| cg08846566 | 8  | 80,803,954  | 0.000191 | 0.254 | 0.254 |          |       |  |          |         |

|            |    |             |          |       |       |  |  |  |           |         |
|------------|----|-------------|----------|-------|-------|--|--|--|-----------|---------|
| cg11137160 | 12 | 125,674,249 | 5.28E-08 | 0.254 | 0.239 |  |  |  |           |         |
| cg07933926 | 12 | 6,485,881   | 4.72E-08 | 0.254 | 0.257 |  |  |  | SCNN1A    | Body    |
| cg16524733 | 11 | 117,070,046 | 6.56E-11 | 0.254 | 0.254 |  |  |  | TAGLN     | 5'UTR   |
| cg10514097 | 16 | 86,544,787  | 0.001625 | 0.254 | 0.153 |  |  |  | FOXF1     | 1stExon |
| cg17033080 | 2  | 217,508,851 | 2.86E-12 | 0.254 | 0.268 |  |  |  | IGFBP2    | Body    |
| cg20555674 | 17 | 37,321,631  | 0.022717 | 0.254 | 0.263 |  |  |  | ARL5C     | Body    |
| cg00766188 | 15 | 89,953,370  | 1.67E-31 | 0.254 | 0.245 |  |  |  |           |         |
| cg14006181 | 14 | 29,254,942  | 1.21E-05 | 0.254 | 0.263 |  |  |  | C14orf23  | Body    |
| cg21625570 | 12 | 50,268,448  | 2.47E-08 | 0.254 | 0.269 |  |  |  | FAIM2     | Body    |
| cg21977377 | 20 | 21,492,823  | 0.026195 | 0.254 | 0.325 |  |  |  | NKX2-2    | Body    |
| cg09943560 | 14 | 91,581,064  | 0.011362 | 0.254 | 0.118 |  |  |  | C14orf159 | 5'UTR   |
| cg09284275 | 16 | 15,923,487  | 8.36E-13 | 0.254 | 0.256 |  |  |  | MYH11     | Body    |
| cg26509318 | 12 | 122,019,760 | 1.86E-05 | 0.254 | 0.264 |  |  |  | KDM2B     | TSS1500 |
| cg27557378 | 16 | 2,286,786   | 0.046727 | 0.254 | 0.086 |  |  |  | DNASE1L2  | 5'UTR   |
| cg08548659 | 4  | 32,149,506  | 0.001399 | 0.254 | 0.246 |  |  |  |           |         |
| cg12262378 | 17 | 6,899,522   | 1.99E-08 | 0.254 | 0.201 |  |  |  | ALOX12    | 1stExon |
| cg01484487 | 2  | 74,726,892  | 4.18E-07 | 0.254 | 0.259 |  |  |  | LBX2      | Body    |
| cg10165585 | 1  | 29,449,042  | 0.002906 | 0.254 | 0.322 |  |  |  | TMEM200B  | 5'UTR   |
| cg11518846 | 6  | 133,562,246 | 0.010021 | 0.254 | 0.305 |  |  |  | EYA4      | TSS1500 |
| cg14684457 | 7  | 26,192,966  | 0.001585 | 0.254 | 0.177 |  |  |  | NFE2L3    | Body    |
| cg15072619 | 10 | 18,294,563  | 1.16E-06 | 0.254 | 0.211 |  |  |  | SLC39A12  | Body    |
| cg10146203 | 15 | 27,111,435  | 0.000771 | 0.254 | 0.252 |  |  |  | GABRA5    | TSS1500 |
| cg10495164 | 11 | 64,631,357  | 1.76E-15 | 0.254 | 0.254 |  |  |  | EHD1      | Body    |
| cg08424184 | 1  | 36,043,633  | 8.98E-07 | 0.254 | 0.248 |  |  |  | TFAP2E    | Body    |
| cg11018604 | 5  | 71,507,163  | 1.25E-13 | 0.254 | 0.241 |  |  |  |           |         |
| cg12850892 | 11 | 75,945,585  | 6.69E-06 | 0.254 | 0.218 |  |  |  |           |         |
| cg16902746 | 19 | 5,338,881   | 2.6E-08  | 0.254 | 0.245 |  |  |  | PTPRS     | 5'UTR   |
| cg03514351 | 1  | 65,991,765  | 4.29E-06 | 0.254 | 0.204 |  |  |  | LEPR      | 5'UTR   |
| cg26886066 | 13 | 113,677,034 | 7.15E-07 | 0.254 | 0.252 |  |  |  | MCF2L     | Body    |
| cg10075976 | 12 | 99,303,715  | 2.37E-05 | 0.253 | 0.215 |  |  |  | ANKS1B    | Body    |
| cg15835542 | 6  | 45,709,808  | 7.24E-07 | 0.253 | 0.218 |  |  |  |           |         |
| cg09272748 | 10 | 43,428,910  | 0.009496 | 0.253 | 0.293 |  |  |  |           |         |
| cg26348487 | 19 | 2,488,560   | 2.34E-10 | 0.253 | 0.240 |  |  |  |           |         |
| cg06562372 | 7  | 87,230,196  | 2.55E-07 | 0.253 | 0.237 |  |  |  | ABCB1     | 5'UTR   |

|            |    |             |          |       |       |            |       |     |                |         |
|------------|----|-------------|----------|-------|-------|------------|-------|-----|----------------|---------|
| cg14958635 | 5  | 134,870,977 | 0.000281 | 0.253 | 0.248 | 4.29E-09   | 0.141 |     | <i>NEUROG1</i> | 1stExon |
| cg22731373 | X  | 24,665,296  | 0.007742 | 0.253 | 0.291 |            |       |     | <i>PCYT1B</i>  | 1stExon |
| cg26122451 | 7  | 92,672,950  | 2.57E-15 | 0.253 | 0.232 |            |       |     |                |         |
| cg08487063 | 10 | 102,894,639 | 0.001083 | 0.253 | 0.271 |            |       |     | <i>TLX1</i>    | Body    |
| cg13715631 | 5  | 134,366,914 | 0.000347 | 0.253 | 0.307 |            |       |     | <i>PITX1</i>   | Body    |
| cg07452312 | 5  | 153,775,466 | 6.49E-10 | 0.253 | 0.262 |            |       |     | <i>GALNT10</i> | Body    |
| cg24935896 | 1  | 201,431,492 | 5.2E-10  | 0.253 | 0.240 |            |       |     |                |         |
| cg01560464 | X  | 142,721,195 | 0.010603 | 0.253 | 0.255 |            |       |     | <i>SLITRK4</i> | 5'UTR   |
| cg14001023 | 19 | 46,526,321  | 1.58E-08 | 0.253 | 0.222 |            |       |     | <i>PGLYRP1</i> | 1stExon |
| cg08935418 | 7  | 158,110,570 | 1.19E-07 | 0.253 | 0.239 |            |       |     | <i>PTPRN2</i>  | Body    |
| cg04255201 | 19 | 46,999,307  | 4.92E-12 | 0.253 | 0.256 |            |       |     | <i>PNMAL2</i>  | TSS200  |
| cg19376461 | 7  | 110,358,708 | 1.84E-16 | 0.253 | 0.239 |            |       |     | <i>IMMP2L</i>  | Body    |
| cg20984188 | 16 | 67,185,059  | 0.038119 | 0.253 | 0.119 |            |       |     | <i>B3GNT9</i>  | TSS200  |
| cg22373225 | 11 | 45,234,334  | 8.8E-62  | 0.253 | 0.240 |            |       |     | <i>PRDM11</i>  | Body    |
| cg07269682 | 11 | 843,915     | 1.69E-06 | 0.253 | 0.210 |            |       |     | <i>TSPAN4</i>  | TSS1500 |
| cg18435674 | 17 | 38,821,155  | 0.001207 | 0.253 | 0.213 |            |       |     | <i>KRT222</i>  | Body    |
| cg25977206 | 14 | 97,499,484  | 0.001561 | 0.253 | 0.219 |            |       |     |                |         |
| cg08659204 | 17 | 35,242,555  | 2.12E-17 | 0.253 | 0.251 |            |       |     |                |         |
| cg14548272 | 8  | 99,961,122  | 2.28E-07 | 0.253 | 0.244 |            |       |     | <i>OSR2</i>    | 5'UTR   |
| cg11440030 | 3  | 147,137,031 | 0.019658 | 0.253 | 0.340 |            |       | Yes |                |         |
| cg22595443 | 10 | 14,510,114  | 1.05E-10 | 0.253 | 0.262 |            |       | Yes |                |         |
| cg24683414 | 1  | 92,952,581  | 4.09E-06 | 0.253 | 0.234 |            |       |     | <i>GFI1</i>    | TSS1500 |
| cg13526469 | 3  | 13,245,693  | 4.39E-06 | 0.253 | 0.216 |            |       |     |                |         |
| cg23677243 | 15 | 37,387,525  | 0.000002 | 0.253 | 0.301 |            |       |     | <i>MEIS2</i>   | Body    |
| cg06346138 | 1  | 17,086,071  | 1.44E-09 | 0.253 | 0.239 |            |       |     | <i>MST1P9</i>  | Body    |
| cg11004890 | 20 | 3,218,500   | 2.39E-14 | 0.253 | 0.235 | 4.58E-08   | 0.112 |     | <i>SLC4A11</i> | TSS200  |
| cg24518098 | 1  | 2,146,288   | 3.93E-17 | 0.253 | 0.252 |            |       |     |                |         |
| cg05546763 | 14 | 95,983,383  | 3.69E-19 | 0.253 | 0.213 |            |       |     |                |         |
| cg14166009 | 19 | 37,825,309  | 0.00613  | 0.253 | 0.147 | 0.00000109 | 0.115 | Yes | <i>HKR1</i>    | TSS1500 |
| cg12099279 | 19 | 40,732,518  | 0.024842 | 0.253 | 0.080 |            |       |     | <i>CNTD2</i>   | 1stExon |
| cg01414407 | 1  | 15,495,100  | 0.000325 | 0.253 | 0.223 |            |       | Yes | <i>TMEM51</i>  | 5'UTR   |
| cg10626063 | 19 | 38,881,032  | 1.28E-09 | 0.253 | 0.246 |            |       |     | <i>SPRED3</i>  | 1stExon |
| cg15032142 | 6  | 28,414,780  | 0.009375 | 0.253 | 0.258 |            |       |     |                |         |
| cg06506863 | 7  | 150,896,449 | 1.12E-08 | 0.253 | 0.272 |            |       |     |                |         |

|            |    |             |          |       |       |          |       |  |                  |         |
|------------|----|-------------|----------|-------|-------|----------|-------|--|------------------|---------|
| cg24725789 | 10 | 119,310,288 | 0.009983 | 0.253 | 0.282 |          |       |  |                  |         |
| cg20467929 | 17 | 72,321,958  | 1.57E-08 | 0.253 | 0.178 |          |       |  | <i>KIF19</i>     | TSS1500 |
| cg21699330 | 7  | 26,193,032  | 0.006659 | 0.253 | 0.150 |          |       |  | <i>NFE2L3</i>    | Body    |
| cg22237425 | 17 | 738,822     | 1.45E-13 | 0.253 | 0.240 |          |       |  | <i>NXN</i>       | Body    |
| cg18732172 | 11 | 504,301     | 1.24E-11 | 0.253 | 0.233 |          |       |  | <i>RNH1</i>      | 5'UTR   |
| cg19083265 | 17 | 75,300,284  | 1.88E-17 | 0.253 | 0.217 |          |       |  | <i>SEPT9</i>     | 5'UTR   |
| cg07855319 | 16 | 69,123,283  | 0.001798 | 0.253 | 0.274 |          |       |  |                  |         |
| cg17384889 | 6  | 28,227,068  | 0.001129 | 0.253 | 0.228 |          |       |  | <i>NKAPL</i>     | TSS200  |
| cg13598010 | 7  | 72,838,776  | 1.59E-06 | 0.253 | 0.220 |          |       |  |                  |         |
| cg14087413 | 9  | 35,848,330  | 5.63E-07 | 0.253 | 0.252 |          |       |  | <i>TMEM8B</i>    | Body    |
| cg21963436 | 13 | 28,541,142  | 0.009518 | 0.253 | 0.196 |          |       |  | <i>CDX2</i>      | Body    |
| cg10784030 | 1  | 38,412,688  | 1.21E-05 | 0.253 | 0.244 | 7.57E-26 | 0.207 |  | <i>INPP5B</i>    | 5'UTR   |
| cg19924619 | 1  | 165,323,692 | 1.99E-05 | 0.253 | 0.269 |          |       |  | <i>LMX1A</i>     | Body    |
| cg01295339 | 2  | 74,729,710  | 4E-05    | 0.253 | 0.252 |          |       |  | <i>LBX2</i>      | Body    |
| cg07446753 | 7  | 2,527,391   | 8.98E-15 | 0.253 | 0.243 |          |       |  |                  |         |
| cg15905656 | 17 | 8,584,536   | 1.45E-05 | 0.253 | 0.267 |          |       |  |                  |         |
| cg00478361 | 1  | 26,552,116  | 0.000196 | 0.253 | 0.260 |          |       |  |                  |         |
| cg15622912 | 5  | 175,225,021 | 0.009548 | 0.253 | 0.242 |          |       |  | <i>CPLX2</i>     | 5'UTR   |
| cg18389639 | 10 | 97,049,610  | 3.39E-07 | 0.253 | 0.251 |          |       |  | <i>PDLIM1</i>    | Body    |
| cg27350104 | 11 | 70,958,638  | 1.28E-22 | 0.253 | 0.233 |          |       |  |                  |         |
| cg05861512 | 14 | 94,442,960  | 0.002846 | 0.253 | 0.265 |          |       |  |                  |         |
| cg08141518 | X  | 133,680,974 | 2.88E-05 | 0.253 | 0.232 |          |       |  | <i>MIR424</i>    | TSS1500 |
| cg22313574 | 8  | 27,468,981  | 2.21E-06 | 0.253 | 0.229 |          |       |  | <i>CLU</i>       | TSS200  |
| cg04832245 | 6  | 32,829,144  | 0.007597 | 0.253 | 0.209 |          |       |  |                  |         |
| cg03379797 | 6  | 138,892,911 | 0.001511 | 0.253 | 0.182 |          |       |  | <i>NHSL1</i>     | 1stExon |
| cg16137147 | 1  | 221,067,896 | 0.022829 | 0.253 | 0.257 |          |       |  |                  |         |
| cg16299455 | 14 | 75,894,309  | 0.015212 | 0.253 | 0.081 |          |       |  | <i>JDP2</i>      | TSS200  |
| cg02772995 | 2  | 161,348,781 | 0.000265 | 0.253 | 0.278 |          |       |  | <i>RBMS1</i>     | Body    |
| cg05826255 | 18 | 55,019,307  | 0.000688 | 0.253 | 0.232 |          |       |  | <i>ST8SIA3</i>   | TSS1500 |
| cg23369564 | 1  | 150,123,734 | 1.54E-07 | 0.253 | 0.256 |          |       |  | <i>PLEKHO1</i>   | Body    |
| cg24360197 | 15 | 66,662,775  | 0.038449 | 0.253 | 0.122 |          |       |  |                  |         |
| cg25323057 | 10 | 88,730,481  | 0.000921 | 0.253 | 0.204 |          |       |  | <i>C10orf116</i> | 3'UTR   |
| cg19488874 | 2  | 175,193,551 | 0.000401 | 0.253 | 0.289 |          |       |  |                  |         |
| cg09048129 | 11 | 119,234,607 | 5.98E-05 | 0.253 | 0.226 |          |       |  | <i>USP2</i>      | 1stExon |

|            |    |             |          |       |       |          |       |     |                 |         |
|------------|----|-------------|----------|-------|-------|----------|-------|-----|-----------------|---------|
| cg16045423 | 22 | 39,377,790  | 0.000903 | 0.253 | 0.253 |          |       |     | <i>APOBEC3B</i> | TSS1500 |
| cg05479130 | 3  | 52,316,296  | 4.15E-22 | 0.253 | 0.244 |          |       |     |                 |         |
| cg10167978 | 15 | 57,825,722  | 1.18E-22 | 0.253 | 0.242 |          |       | Yes | <i>CGNL1</i>    | Body    |
| cg21590108 | 8  | 23,609,057  | 6.12E-12 | 0.253 | 0.227 |          |       |     |                 |         |
| cg14500300 | 9  | 211,689     | 0.000213 | 0.253 | 0.318 |          |       |     |                 |         |
| cg23989336 | 17 | 79,283,915  | 1.73E-07 | 0.253 | 0.203 |          |       |     | <i>C17orf55</i> | TSS1500 |
| cg00088688 | 6  | 167,560,504 | 6.68E-11 | 0.253 | 0.197 |          |       |     |                 |         |
| cg03451178 | 2  | 172,864,273 | 9.5E-09  | 0.253 | 0.244 |          |       |     | <i>MAP1D</i>    | TSS1500 |
| cg11584690 | 19 | 42,574,196  | 3.16E-07 | 0.253 | 0.222 | 5.64E-25 | 0.190 |     |                 |         |
| cg15092219 | 1  | 247,511,364 | 3.83E-05 | 0.253 | 0.246 |          |       |     |                 |         |
| cg18719157 | X  | 133,680,925 | 8.35E-08 | 0.253 | 0.264 |          |       |     | <i>MGC16121</i> | TSS1500 |
| cg02587648 | 1  | 2,023,258   | 0.000459 | 0.253 | 0.293 |          |       |     | <i>PRKCZ</i>    | Body    |
| cg11124260 | 10 | 79,709,078  | 1.18E-08 | 0.253 | 0.215 |          |       |     |                 |         |
| cg15393022 | 1  | 54,775,837  | 1.35E-08 | 0.253 | 0.221 |          |       |     | <i>SSBP3</i>    | Body    |
| cg20599798 | 2  | 31,361,760  | 0.012312 | 0.253 | 0.139 |          |       |     | <i>GALNT14</i>  | TSS200  |
| cg00255142 | 6  | 31,830,812  | 0.045471 | 0.253 | 0.249 |          |       |     | <i>NEU1</i>     | TSS200  |
| cg27361914 | 19 | 51,567,972  | 0.000133 | 0.253 | 0.255 |          |       |     | <i>KLK13</i>    | Body    |
| cg18450500 | 14 | 104,690,201 | 8.51E-11 | 0.253 | 0.239 |          |       |     |                 |         |
| cg20696432 | 17 | 18,881,907  | 3.5E-10  | 0.253 | 0.220 |          |       |     | <i>SLC5A10</i>  | Body    |
| cg22186831 | 5  | 176,544,048 | 0.04313  | 0.253 | 0.265 |          |       |     |                 |         |
| cg18871289 | 17 | 72,210,278  | 7.2E-09  | 0.253 | 0.202 |          |       |     | <i>MGC16275</i> | TSS1500 |
| cg05937292 | 5  | 77,269,342  | 0.001318 | 0.253 | 0.275 |          |       |     |                 |         |
| cg18546384 | 7  | 2,077,057   | 9.52E-22 | 0.253 | 0.232 |          |       |     | <i>MAD1L1</i>   | Body    |
| cg21197219 | 1  | 3,374,906   | 6.35E-12 | 0.253 | 0.237 |          |       |     | <i>ARHGEF16</i> | 5'UTR   |
| cg18292394 | 10 | 82,049,450  | 4.9E-05  | 0.253 | 0.204 | 2.03E-28 | 0.236 |     | <i>MAT1A</i>    | TSS200  |
| cg19391535 | 7  | 148,398,020 | 2.28E-18 | 0.253 | 0.244 |          |       |     | <i>CUL1</i>     | 5'UTR   |
| cg07177380 | 4  | 175,133,151 | 0.001572 | 0.253 | 0.242 |          |       |     |                 |         |
| cg13941669 | 5  | 156,886,982 | 0.002141 | 0.253 | 0.150 |          |       |     | <i>NIPAL4</i>   | TSS200  |
| cg09292226 | 6  | 1,392,250   | 4.58E-11 | 0.253 | 0.217 |          |       |     | <i>FOXF2</i>    | Body    |
| cg18786623 | 6  | 29,894,050  | 2.18E-05 | 0.253 | 0.179 |          |       |     | <i>HCG4P6</i>   | TSS1500 |
| cg20709530 | 20 | 36,040,249  | 6.51E-10 | 0.253 | 0.270 |          |       |     |                 |         |
| cg00083042 | 10 | 30,404,617  | 2.65E-12 | 0.253 | 0.241 |          |       |     |                 |         |
| cg05996671 | 3  | 123,518,635 | 1.34E-09 | 0.253 | 0.232 |          |       |     | <i>MYLK</i>     | 5'UTR   |
| cg24981593 | 2  | 45,160,253  | 0.013527 | 0.253 | 0.226 |          |       |     |                 |         |

|            |    |             |          |       |       |  |  |  |                  |         |
|------------|----|-------------|----------|-------|-------|--|--|--|------------------|---------|
| cg19302183 | 1  | 56,397,400  | 8.79E-12 | 0.253 | 0.243 |  |  |  |                  |         |
| cg25204319 | 2  | 12,984,815  | 4.47E-10 | 0.253 | 0.227 |  |  |  |                  |         |
| cg01302656 | 14 | 29,254,853  | 0.001398 | 0.253 | 0.176 |  |  |  | <i>C14orf23</i>  | Body    |
| cg01695225 | 2  | 73,152,672  | 0.000383 | 0.253 | 0.246 |  |  |  | <i>EMX1</i>      | Body    |
| cg06626184 | 9  | 126,775,931 | 8.79E-07 | 0.253 | 0.241 |  |  |  | <i>LHX2</i>      | Body    |
| cg15931949 | 3  | 138,662,315 | 1.06E-08 | 0.253 | 0.255 |  |  |  |                  |         |
| cg19925849 | 19 | 54,445,377  | 0.000501 | 0.253 | 0.262 |  |  |  | <i>CACNG7</i>    | Body    |
| cg14682922 | 5  | 1,016,768   | 0.000606 | 0.253 | 0.244 |  |  |  | <i>NKD2</i>      | Body    |
| cg17349352 | 7  | 45,066,738  | 1.84E-10 | 0.253 | 0.227 |  |  |  | <i>CCM2</i>      | Body    |
| cg11130317 | 14 | 103,739,856 | 4.07E-05 | 0.253 | 0.185 |  |  |  |                  |         |
| cg26624796 | 16 | 30,406,176  | 5.73E-05 | 0.253 | 0.212 |  |  |  | <i>ZNF48</i>     | TSS1500 |
| cg01362455 | 6  | 29,855,490  | 7.72E-21 | 0.253 | 0.218 |  |  |  | <i>HLA-H</i>     | Body    |
| cg12426652 | 21 | 37,915,056  | 3.91E-11 | 0.253 | 0.236 |  |  |  | <i>CLDN14</i>    | TSS200  |
| cg18917517 | 2  | 242,743,958 | 0.002535 | 0.253 | 0.321 |  |  |  |                  |         |
| cg00512280 | 19 | 2,282,161   | 0.002631 | 0.253 | 0.224 |  |  |  | <i>C19orf35</i>  | 5'UTR   |
| cg10497871 | 14 | 92,041,114  | 2.14E-05 | 0.253 | 0.224 |  |  |  | <i>C14orf184</i> | 5'UTR   |
| cg15342087 | 6  | 30,720,209  | 4.74E-09 | 0.253 | 0.175 |  |  |  |                  |         |
| cg20797905 | 17 | 78,747,227  | 3.3E-07  | 0.253 | 0.241 |  |  |  | <i>RPTOR</i>     | Body    |
| cg25878366 | 11 | 12,767,438  | 4.75E-22 | 0.253 | 0.256 |  |  |  | <i>TEAD1</i>     | 5'UTR   |
| cg25510753 | 7  | 130,008,536 | 2.11E-05 | 0.253 | 0.211 |  |  |  | <i>CPA5</i>      | 3'UTR   |
| cg26140790 | 10 | 126,301,281 | 9.49E-08 | 0.253 | 0.269 |  |  |  | <i>LHPP</i>      | Body    |
| cg18887230 | 7  | 98,739,627  | 0.03522  | 0.253 | 0.247 |  |  |  | <i>SMURF1</i>    | Body    |
| cg20011326 | 11 | 59,333,844  | 0.024193 | 0.253 | 0.251 |  |  |  |                  |         |
| cg10274022 | 19 | 40,871,697  | 0.00117  | 0.253 | 0.253 |  |  |  | <i>PLD3</i>      | 5'UTR   |
| cg11559446 | 8  | 141,728,568 | 5.93E-28 | 0.253 | 0.262 |  |  |  | <i>PTK2</i>      | Body    |
| cg04682802 | 20 | 11,898,478  | 0.00958  | 0.253 | 0.083 |  |  |  | <i>BTBD3</i>     | 5'UTR   |
| cg03454711 | 8  | 144,852,716 | 0.000122 | 0.252 | 0.240 |  |  |  |                  |         |
| cg05349837 | 12 | 54,430,991  | 3.63E-15 | 0.252 | 0.221 |  |  |  | <i>HOXC4</i>     | 5'UTR   |
| cg06016684 | X  | 20,134,557  | 0.008542 | 0.252 | 0.227 |  |  |  | <i>MAP7D2</i>    | Body    |
| cg25741215 | 2  | 63,287,082  | 0.034838 | 0.252 | 0.318 |  |  |  |                  |         |
| cg03244411 | 6  | 99,295,790  | 0.000439 | 0.252 | 0.205 |  |  |  |                  |         |
| cg11848487 | 6  | 48,035,985  | 3.96E-07 | 0.252 | 0.267 |  |  |  | <i>C6orf138</i>  | 1stExon |
| cg02898159 | 19 | 5,346,237   | 4.6E-05  | 0.252 | 0.259 |  |  |  |                  |         |
| cg23165899 | 6  | 19,837,095  | 0.021786 | 0.252 | 0.148 |  |  |  | <i>ID4</i>       | TSS1500 |

|            |    |             |          |       |       |  |  |  |                  |         |
|------------|----|-------------|----------|-------|-------|--|--|--|------------------|---------|
| cg26895569 | 1  | 204,329,222 | 4.45E-11 | 0.252 | 0.250 |  |  |  | <i>PLEKHA6</i>   | TSS200  |
| cg09024435 | 3  | 62,360,893  | 0.034607 | 0.252 | 0.268 |  |  |  |                  |         |
| cg08543966 | 19 | 35,646,150  | 0.012292 | 0.252 | 0.295 |  |  |  | <i>FXVD5</i>     | 5'UTR   |
| cg07533422 | 5  | 92,935,283  | 4.69E-12 | 0.252 | 0.245 |  |  |  |                  |         |
| cg16117799 | 4  | 81,106,857  | 0.000447 | 0.252 | 0.220 |  |  |  | <i>PRDM8</i>     | 5'UTR   |
| cg17301216 | 15 | 89,920,348  | 6.42E-09 | 0.252 | 0.269 |  |  |  | <i>LOC254559</i> | TSS1500 |
| cg17827328 | 1  | 36,817,299  | 5.2E-48  | 0.252 | 0.241 |  |  |  | <i>STK40</i>     | Body    |
| cg14606328 | 21 | 45,177,639  | 1.33E-09 | 0.252 | 0.260 |  |  |  | <i>PDXK</i>      | 3'UTR   |
| cg22968966 | 16 | 22,959,875  | 0.00193  | 0.252 | 0.254 |  |  |  |                  |         |
| cg11685547 | 9  | 135,455,303 | 2.96E-06 | 0.252 | 0.256 |  |  |  |                  |         |
| cg14789818 | 1  | 227,748,712 | 1.85E-15 | 0.252 | 0.232 |  |  |  |                  |         |
| cg21880222 | 2  | 103,327,770 | 3.37E-06 | 0.252 | 0.299 |  |  |  | <i>SLC9A2</i>    | 3'UTR   |
| cg05250119 | 15 | 79,123,384  | 1.11E-08 | 0.252 | 0.248 |  |  |  |                  |         |
| cg16509239 | 11 | 62,212,431  | 1.03E-12 | 0.252 | 0.240 |  |  |  | <i>AHNAK</i>     | Body    |
| cg26544247 | 2  | 25,473,781  | 8.51E-17 | 0.252 | 0.227 |  |  |  | <i>DNMT3A</i>    | Body    |
| cg00326908 | 8  | 66,755,120  | 0.005713 | 0.252 | 0.161 |  |  |  | <i>PDE7A</i>     | TSS1500 |
| cg03035653 | X  | 99,662,932  | 0.000138 | 0.252 | 0.283 |  |  |  | <i>PCDH19</i>    | 1stExon |
| cg06390484 | 7  | 134,575,271 | 1.69E-10 | 0.252 | 0.250 |  |  |  | <i>CALD1</i>     | TSS1500 |
| cg06991300 | 4  | 122,301,724 | 0.000414 | 0.252 | 0.235 |  |  |  | <i>QRFPR</i>     | 1stExon |
| cg13356540 | 1  | 7,449,057   | 1.69E-21 | 0.252 | 0.234 |  |  |  | <i>CAMTA1</i>    | Body    |
| cg16860686 | 22 | 42,311,634  | 1.65E-07 | 0.252 | 0.237 |  |  |  |                  |         |
| cg02576468 | 19 | 41,074,006  | 0.017687 | 0.252 | 0.139 |  |  |  | <i>SPTBN4</i>    | Body    |
| cg09555124 | 6  | 160,451,213 | 2.05E-13 | 0.252 | 0.271 |  |  |  | <i>IGF2R</i>     | Body    |
| cg24205914 | 10 | 62,761,575  | 1.15E-07 | 0.252 | 0.198 |  |  |  | <i>RHOBTB1</i>   | TSS1500 |
| cg11932249 | X  | 71,524,953  | 2.31E-06 | 0.252 | 0.225 |  |  |  | <i>CITED1</i>    | 5'UTR   |
| cg25698741 | 10 | 120,006,292 | 1.7E-05  | 0.252 | 0.252 |  |  |  |                  |         |
| cg03982831 | 1  | 182,669,315 | 0.001369 | 0.252 | 0.244 |  |  |  |                  |         |
| cg20608895 | 13 | 109,896,380 | 0.000749 | 0.252 | 0.227 |  |  |  |                  |         |
| cg05858042 | 11 | 569,232     | 2.13E-05 | 0.252 | 0.282 |  |  |  | <i>MIR210</i>    | TSS1500 |
| cg23883058 | 2  | 5,813,866   | 0.000911 | 0.252 | 0.188 |  |  |  |                  |         |
| cg24633771 | 8  | 104,149,619 | 0.002131 | 0.252 | 0.176 |  |  |  | <i>C8orf56</i>   | Body    |
| cg26314722 | 1  | 234,867,300 | 3.23E-09 | 0.252 | 0.234 |  |  |  |                  |         |
| cg04548856 | 14 | 57,284,528  | 0.000227 | 0.252 | 0.214 |  |  |  | <i>OTX2OS1</i>   | Body    |
| cg15981734 | 2  | 200,334,558 | 3.94E-05 | 0.252 | 0.255 |  |  |  | <i>FLJ32063</i>  | Body    |



|            |    |             |          |       |       |          |       |  |                  |         |
|------------|----|-------------|----------|-------|-------|----------|-------|--|------------------|---------|
| cg24753061 | 18 | 19,752,362  | 1.44E-11 | 0.252 | 0.222 |          |       |  | <i>GATA6</i>     | Body    |
| cg26977936 | 6  | 28,558,022  | 2.72E-05 | 0.252 | 0.270 |          |       |  |                  |         |
| cg13391820 | 12 | 4,384,404   | 0.007327 | 0.252 | 0.272 |          |       |  | <i>CCND2</i>     | Body    |
| cg01105948 | 13 | 32,605,196  | 0.001484 | 0.252 | 0.131 |          |       |  | <i>FRY</i>       | TSS1500 |
| cg01196788 | 2  | 19,561,709  | 2E-16    | 0.252 | 0.254 |          |       |  |                  |         |
| cg04029933 | 20 | 31,068,427  | 2.23E-38 | 0.252 | 0.257 |          |       |  | <i>C20orf112</i> | 5'UTR   |
| cg07007400 | 12 | 52,626,831  | 1.35E-05 | 0.252 | 0.273 | 3.45E-22 | 0.193 |  | <i>KRT7</i>      | TSS200  |
| cg13407975 | 19 | 18,705,946  | 3.39E-05 | 0.252 | 0.253 |          |       |  | <i>CRLF1</i>     | Body    |
| cg26624134 | 11 | 128,761,419 | 0.003844 | 0.252 | 0.166 | 4.26E-13 | 0.146 |  | <i>KCNJ5</i>     | 1stExon |
| cg03221483 | 17 | 75,315,081  | 0.023211 | 0.252 | 0.208 |          |       |  | <i>SEPT9</i>     | 5'UTR   |
| cg04495354 | 16 | 57,294,356  | 6.72E-06 | 0.252 | 0.275 |          |       |  | <i>PLLP</i>      | Body    |
| cg12741645 | 15 | 89,167,736  | 8.28E-05 | 0.252 | 0.258 |          |       |  | <i>AEN</i>       | 5'UTR   |
| cg14686555 | 2  | 6,121,915   | 0.000375 | 0.252 | 0.272 |          |       |  | <i>LOC400940</i> | TSS200  |
| cg02779944 | 1  | 200,004,584 | 8.38E-06 | 0.252 | 0.265 |          |       |  | <i>NR5A2</i>     | Body    |
| cg26621699 | 4  | 145,566,903 | 6.68E-05 | 0.252 | 0.224 |          |       |  | <i>HHIP</i>      | TSS1500 |
| cg02101773 | 20 | 20,347,593  | 0.007559 | 0.252 | 0.182 |          |       |  | <i>INSM1</i>     | TSS1500 |
| cg02457680 | 1  | 154,475,139 | 0.010384 | 0.252 | 0.148 |          |       |  | <i>TDRD10</i>    | 5'UTR   |
| cg19047868 | 17 | 46,669,485  | 1.19E-14 | 0.252 | 0.235 |          |       |  | <i>LOC404266</i> | TSS200  |
| cg07865216 | 10 | 98,910,008  | 1.8E-13  | 0.252 | 0.266 |          |       |  | <i>SLIT1</i>     | Body    |
| cg06869454 | 6  | 3,770,466   | 2.02E-07 | 0.252 | 0.248 |          |       |  |                  |         |
| cg06946797 | 16 | 11,422,409  | 7.59E-06 | 0.252 | 0.288 |          |       |  |                  |         |
| cg14742937 | 8  | 39,172,097  | 5.46E-05 | 0.252 | 0.275 |          |       |  | <i>ADAM5P</i>    | TSS200  |
| cg04501840 | 1  | 226,737,975 | 0.004881 | 0.252 | 0.238 |          |       |  | <i>C1orf95</i>   | Body    |
| cg02767634 | 5  | 179,036,637 | 4.69E-05 | 0.252 | 0.272 |          |       |  | <i>RUFY1</i>     | 3'UTR   |
| cg18457851 | X  | 40,104,514  | 2.48E-06 | 0.252 | 0.236 |          |       |  |                  |         |
| cg26445608 | 20 | 2,780,114   | 2.17E-17 | 0.252 | 0.239 |          |       |  | <i>CPXM1</i>     | Body    |
| cg01324702 | 5  | 138,290,007 | 3.87E-19 | 0.252 | 0.215 |          |       |  | <i>SIL1</i>      | Body    |
| cg20073153 | 10 | 30,238,815  | 0.000339 | 0.252 | 0.283 |          |       |  |                  |         |
| cg22776856 | 16 | 3,072,572   | 1.74E-10 | 0.252 | 0.251 |          |       |  | <i>THOC6</i>     | TSS1500 |
| cg23643814 | 17 | 2,627,585   | 0.00039  | 0.252 | 0.313 |          |       |  |                  |         |
| cg09565397 | 8  | 145,543,014 | 4.3E-15  | 0.252 | 0.242 |          |       |  | <i>DGAT1</i>     | Body    |
| cg19131313 | 8  | 1,704,013   | 0.000265 | 0.252 | 0.245 |          |       |  |                  |         |
| cg03361164 | 6  | 100,915,805 | 0.005106 | 0.252 | 0.300 |          |       |  |                  |         |
| cg06202585 | 2  | 38,325,802  | 2.79E-06 | 0.252 | 0.240 |          |       |  |                  |         |

|            |    |             |          |       |       |           |       |     |  |                  |         |
|------------|----|-------------|----------|-------|-------|-----------|-------|-----|--|------------------|---------|
| cg12046414 | 2  | 220,379,199 | 0.011902 | 0.252 | 0.207 |           |       |     |  | <i>ACCN4</i>     | 1stExon |
| cg04688351 | 2  | 223,154,140 | 0.008525 | 0.252 | 0.280 |           |       |     |  | <i>PAX3</i>      | Body    |
| cg21568106 | 2  | 66,805,366  | 0.009078 | 0.252 | 0.257 |           |       |     |  |                  |         |
| cg05817758 | 11 | 13,030,567  | 0.004088 | 0.252 | 0.107 |           |       |     |  | <i>RASSF10</i>   | TSS200  |
| cg09050331 | 8  | 70,984,917  | 1.72E-07 | 0.252 | 0.243 |           |       |     |  | <i>PRDM14</i>    | TSS1500 |
| cg10660256 | 5  | 78,407,683  | 5.63E-05 | 0.252 | 0.262 | 1.74E-22  | 0.261 |     |  | <i>BHMT</i>      | 5'UTR   |
| cg20114113 | 10 | 93,391,963  | 0.000415 | 0.252 | 0.212 |           |       | Yes |  | <i>PPP1R3C</i>   | Body    |
| cg24072451 | 2  | 133,888,263 | 2.13E-15 | 0.252 | 0.252 |           |       |     |  | <i>NCKAP5</i>    | Body    |
| cg27048684 | 16 | 27,791,167  | 0.000742 | 0.252 | 0.192 |           |       |     |  | <i>KIAA0556</i>  | 3'UTR   |
| cg01408508 | 20 | 26,188,639  | 0.001302 | 0.252 | 0.229 |           |       |     |  |                  |         |
| cg03171465 | 2  | 99,553,830  | 1.34E-05 | 0.252 | 0.257 |           |       |     |  | <i>C2orf55</i>   | TSS1500 |
| cg07644368 | 5  | 115,152,785 | 0.037846 | 0.252 | 0.032 | 0.0009046 | 0.082 |     |  | <i>CDO1</i>      | TSS1500 |
| cg15148933 | 4  | 94,756,031  | 8.47E-06 | 0.252 | 0.235 |           |       |     |  |                  |         |
| cg02132714 | 17 | 46,656,690  | 0.00119  | 0.252 | 0.235 |           |       |     |  | <i>HOXB4</i>     | TSS1500 |
| cg08010865 | 13 | 24,807,902  | 2.83E-09 | 0.252 | 0.237 |           |       | Yes |  | <i>SPATA13</i>   | Body    |
| cg12627354 | 11 | 46,940,434  | 4.21E-05 | 0.252 | 0.227 |           |       |     |  | <i>LRP4</i>      | TSS1500 |
| cg22795212 | 1  | 33,938,026  | 0.039368 | 0.252 | 0.233 |           |       |     |  | <i>ZSCAN20</i>   | TSS1500 |
| cg19383430 | 3  | 187,086,187 | 0.019798 | 0.252 | 0.090 |           |       |     |  | <i>RTP4</i>      | 5'UTR   |
| cg07734975 | 11 | 9,780,844   | 1.34E-14 | 0.252 | 0.226 |           |       |     |  |                  |         |
| cg13305336 | 1  | 229,366,001 | 6.48E-05 | 0.252 | 0.300 |           |       |     |  |                  |         |
| cg15344504 | 3  | 31,677,078  | 3.18E-15 | 0.252 | 0.257 |           |       |     |  | <i>STT3B</i>     | Body    |
| cg26939195 | 6  | 32,077,020  | 0.000386 | 0.252 | 0.223 |           |       |     |  | <i>TNXB</i>      | 5'UTR   |
| cg06862374 | 2  | 219,736,549 | 1.67E-05 | 0.252 | 0.236 |           |       |     |  | <i>WNT6</i>      | Body    |
| cg02202193 | 6  | 6,546,851   | 0.025677 | 0.252 | 0.103 |           |       |     |  | <i>LOC285780</i> | Body    |
| cg13308964 | 17 | 69,029,659  | 0.000329 | 0.252 | 0.254 |           |       |     |  |                  |         |
| cg16028753 | 1  | 53,527,435  | 2.64E-08 | 0.252 | 0.192 | 6.29E-25  | 0.180 |     |  | <i>PODN</i>      | TSS1500 |
| cg01466288 | 1  | 119,550,803 | 0.007052 | 0.252 | 0.251 |           |       |     |  |                  |         |
| cg26624914 | 9  | 33,448,382  | 1.4E-19  | 0.252 | 0.245 | 1.07E-16  | 0.215 |     |  | <i>SUGT1P1</i>   | Body    |
| cg02770252 | 6  | 14,450,312  | 1.88E-22 | 0.252 | 0.240 |           |       |     |  |                  |         |
| cg11944797 | 13 | 99,135,711  | 1.57E-06 | 0.252 | 0.171 |           |       |     |  | <i>STK24</i>     | Body    |
| cg16343134 | 6  | 136,657,129 | 4.27E-12 | 0.252 | 0.252 |           |       |     |  |                  |         |
| cg02383785 | 7  | 127,808,848 | 0.000111 | 0.252 | 0.247 |           |       |     |  |                  |         |
| cg12298745 | 18 | 76,737,545  | 6.81E-05 | 0.252 | 0.258 |           |       |     |  |                  |         |
| cg10210397 | 8  | 42,410,091  | 9.34E-08 | 0.252 | 0.250 |           |       |     |  |                  |         |

|            |    |             |          |       |       |          |       |     |                  |         |
|------------|----|-------------|----------|-------|-------|----------|-------|-----|------------------|---------|
| cg14511652 | 9  | 133,783,802 | 7.78E-08 | 0.252 | 0.246 |          |       |     | <i>FIBCD1</i>    | Body    |
| cg00711072 | 17 | 46,669,489  | 6.1E-18  | 0.252 | 0.237 |          |       |     | <i>LOC404266</i> | TSS200  |
| cg12382153 | 15 | 58,357,204  | 0.005514 | 0.252 | 0.141 |          |       |     | <i>ALDH1A2</i>   | Body    |
| cg20543544 | 10 | 81,003,657  | 0.000369 | 0.252 | 0.239 |          |       |     | <i>ZMIZ1</i>     | Body    |
| cg02541778 | 8  | 55,382,901  | 0.041954 | 0.252 | 0.320 |          |       |     |                  |         |
| cg07016556 | 17 | 79,393,532  | 0.003662 | 0.252 | 0.084 |          |       |     | <i>BAHCC1</i>    | Body    |
| cg23477460 | 3  | 66,848,765  | 0.000314 | 0.252 | 0.279 |          |       |     |                  |         |
| cg02932355 | 8  | 102,184,648 | 3.21E-10 | 0.252 | 0.250 |          |       |     |                  |         |
| cg03671802 | 18 | 56,941,473  | 0.011422 | 0.252 | 0.233 |          |       |     | <i>RAX</i>       | TSS1500 |
| cg08297985 | 16 | 85,343,488  | 1.46E-25 | 0.252 | 0.236 |          |       |     |                  |         |
| cg01591025 | 7  | 25,018,595  | 2.51E-11 | 0.252 | 0.247 |          |       |     | <i>OSBPL3</i>    | 5'UTR   |
| cg00490606 | 8  | 102,217,748 | 1.56E-10 | 0.252 | 0.247 |          |       |     | <i>ZNF706</i>    | 5'UTR   |
| cg15278646 | 15 | 28,341,980  | 0.028081 | 0.252 | 0.319 |          |       |     | <i>OCA2</i>      | 5'UTR   |
| cg00084094 | 12 | 109,096,204 | 0.000621 | 0.252 | 0.264 |          |       |     | <i>CORO1C</i>    | 5'UTR   |
| cg09587549 | 16 | 31,214,126  | 0.024654 | 0.252 | 0.128 | 1.47E-10 | 0.156 |     | <i>PYCARD</i>    | 5'UTR   |
| cg07240834 | 4  | 175,139,755 | 3.55E-07 | 0.252 | 0.216 |          |       |     |                  |         |
| cg08475096 | 4  | 158,143,750 | 9.58E-06 | 0.252 | 0.207 |          |       |     | <i>GRIA2</i>     | Body    |
| cg13032463 | 6  | 166,582,585 | 0.000638 | 0.252 | 0.326 |          |       |     | <i>T</i>         | TSS1500 |
| cg18302225 | 5  | 55,776,401  | 9.18E-05 | 0.252 | 0.152 |          |       |     |                  |         |
| cg01444716 | 20 | 11,898,557  | 0.013053 | 0.252 | 0.079 |          |       |     | <i>BTBD3</i>     | 5'UTR   |
| cg04092800 | 5  | 40,681,444  | 3.09E-08 | 0.252 | 0.259 |          |       |     | <i>PTGER4</i>    | Body    |
| cg06212224 | 2  | 175,198,768 | 0.004602 | 0.252 | 0.196 |          |       |     | <i>SP9</i>       | TSS1500 |
| cg07345734 | 14 | 36,986,363  | 0.005956 | 0.252 | 0.327 |          |       |     | <i>NKX2-1</i>    | 3'UTR   |
| cg19455840 | 10 | 102,906,171 | 0.000249 | 0.252 | 0.262 |          |       | Yes |                  |         |
| cg08358166 | 17 | 18,538,271  | 0.033408 | 0.252 | 0.291 |          |       |     |                  |         |
| cg11080549 | 5  | 92,909,968  | 5.26E-06 | 0.252 | 0.211 |          |       |     | <i>FLJ42709</i>  | Body    |
| cg13514772 | 8  | 38,770,414  | 2.36E-12 | 0.252 | 0.261 |          |       |     | <i>PLEKHA2</i>   | 5'UTR   |
| cg05393726 | 3  | 133,615,119 | 0.027094 | 0.252 | 0.193 |          |       |     | <i>RAB6B</i>     | TSS1500 |
| cg18151012 | 1  | 19,600,909  | 7.25E-05 | 0.252 | 0.204 |          |       |     | <i>AKR7L</i>     | TSS1500 |
| cg05133179 | 11 | 116,451,176 | 0.012537 | 0.252 | 0.229 |          |       |     |                  |         |
| cg23095743 | 10 | 104,000,831 | 0.005008 | 0.252 | 0.303 |          |       |     | <i>PITX3</i>     | 5'UTR   |
| cg02236679 | 16 | 78,782,477  | 3.8E-18  | 0.251 | 0.231 |          |       |     | <i>WWOX</i>      | Body    |
| cg02817030 | 7  | 20,833,508  | 0.005503 | 0.251 | 0.248 |          |       |     |                  |         |
| cg04167854 | 11 | 18,031,127  | 5.58E-08 | 0.251 | 0.259 |          |       |     | <i>SERGEF</i>    | Body    |

|            |    |             |          |       |       |          |       |     |                 |         |
|------------|----|-------------|----------|-------|-------|----------|-------|-----|-----------------|---------|
| cg16162324 | 12 | 104,852,047 | 4.52E-05 | 0.251 | 0.221 |          |       |     | <i>CHST11</i>   | Body    |
| cg24794531 | 3  | 142,443,837 | 0.005971 | 0.251 | 0.236 | 8.69E-18 | 0.168 |     | <i>TRPC1</i>    | Body    |
| cg19623418 | 20 | 55,499,548  | 1.53E-09 | 0.251 | 0.267 |          |       |     |                 |         |
| cg26885268 | 7  | 149,389,941 | 0.00036  | 0.251 | 0.248 |          |       |     |                 |         |
| cg27641532 | 6  | 27,648,317  | 8.78E-06 | 0.251 | 0.296 |          |       |     |                 |         |
| cg21999939 | 5  | 2,755,004   | 3.07E-05 | 0.251 | 0.268 |          |       |     | <i>C5orf38</i>  | Body    |
| cg21771173 | 5  | 169,064,071 | 0.005019 | 0.251 | 0.316 |          |       |     | <i>DOCK2</i>    | TSS200  |
| cg27342781 | 16 | 84,566,279  | 5.92E-13 | 0.251 | 0.239 |          |       |     |                 |         |
| cg24642844 | 7  | 1,081,250   | 2.32E-19 | 0.251 | 0.237 |          |       |     | <i>C7orf50</i>  | Body    |
| cg24701575 | 11 | 31,845,389  | 0.016894 | 0.251 | 0.269 |          |       |     |                 |         |
| cg14424538 | 20 | 1,784,365   | 0.030576 | 0.251 | 0.088 |          |       |     |                 |         |
| cg18278184 | 10 | 70,847,430  | 0.015022 | 0.251 | 0.083 |          |       |     | <i>SRGN</i>     | TSS1500 |
| cg23323891 | 14 | 57,200,519  | 5.55E-08 | 0.251 | 0.213 |          |       |     |                 |         |
| cg08293075 | 6  | 32,156,294  | 2.58E-20 | 0.251 | 0.244 |          |       |     | <i>PBX2</i>     | Body    |
| cg09385936 | 14 | 100,791,876 | 1.87E-09 | 0.251 | 0.249 |          |       |     | <i>C14orf68</i> | Body    |
| cg17489871 | 2  | 439,337     | 1.03E-07 | 0.251 | 0.234 |          |       |     |                 |         |
| cg23502162 | 2  | 189,839,015 | 9.22E-13 | 0.251 | 0.233 |          |       |     | <i>COL3A1</i>   | TSS200  |
| cg14516100 | 4  | 186,560,083 | 1.17E-05 | 0.251 | 0.246 |          |       |     | <i>SORBS2</i>   | Body    |
| cg26718433 | 10 | 44,880,730  | 0.002149 | 0.251 | 0.226 |          |       |     | <i>CXCL12</i>   | TSS200  |
| cg12140851 | 7  | 26,897,612  | 6.52E-13 | 0.251 | 0.243 |          |       |     | <i>SKAP2</i>    | Body    |
| cg18145759 | 2  | 109,901,466 | 1.94E-16 | 0.251 | 0.284 |          |       |     | <i>SH3RF3</i>   | Body    |
| cg18270675 | 11 | 85,422,118  | 7.69E-06 | 0.251 | 0.247 |          |       |     | <i>SYTL2</i>    | Body    |
| cg05614333 | 15 | 27,111,774  | 0.000623 | 0.251 | 0.242 |          |       |     | <i>GABRA5</i>   | TSS1500 |
| cg05746024 | 1  | 154,540,074 | 0.004968 | 0.251 | 0.249 |          |       |     | <i>CHRNA2</i>   | TSS200  |
| cg25738714 | 1  | 50,893,658  | 0.018487 | 0.251 | 0.227 |          |       |     |                 |         |
| cg18300492 | 5  | 2,129,206   | 0.026747 | 0.251 | 0.223 |          |       |     |                 |         |
| cg10304824 | 2  | 177,028,804 | 4.05E-05 | 0.251 | 0.235 |          |       |     | <i>HOXD3</i>    | 1stExon |
| cg22490780 | 5  | 16,867,064  | 7.24E-14 | 0.251 | 0.246 |          |       |     | <i>MYO10</i>    | Body    |
| cg02025879 | 16 | 22,326,203  | 2.81E-15 | 0.251 | 0.241 |          |       |     | <i>POLR3E</i>   | Body    |
| cg03356778 | 11 | 120,110,544 | 1.93E-12 | 0.251 | 0.232 |          |       |     | <i>POU2F3</i>   | TSS1500 |
| cg05353869 | 11 | 75,139,544  | 0.006374 | 0.251 | 0.204 |          |       |     | <i>KLHL35</i>   | Body    |
| cg24446429 | 18 | 74,798,054  | 4.13E-08 | 0.251 | 0.206 |          |       |     | <i>MBP</i>      | Body    |
| cg17251265 | 17 | 5,487,585   | 8.2E-11  | 0.251 | 0.251 |          |       | Yes | <i>NLRP1</i>    | 5'UTR   |
| cg11873372 | 10 | 130,274,436 | 0.000272 | 0.251 | 0.183 |          |       |     |                 |         |

|            |    |             |          |       |       |          |       |     |                   |         |
|------------|----|-------------|----------|-------|-------|----------|-------|-----|-------------------|---------|
| cg15806857 | 17 | 2,305,903   | 0.000589 | 0.251 | 0.254 |          |       |     |                   |         |
| cg10653163 | 12 | 109,124,059 | 0.000222 | 0.251 | 0.107 |          |       |     | <i>CORO1C</i>     | 5'UTR   |
| cg17470251 | 8  | 19,459,996  | 1.26E-06 | 0.251 | 0.230 |          |       |     | <i>CSGALNACT1</i> | 1stExon |
| cg04477010 | 8  | 38,175,544  | 2.07E-16 | 0.251 | 0.246 |          |       |     | <i>WHSC1L1</i>    | Body    |
| cg06707663 | 11 | 61,381,267  | 6.98E-09 | 0.251 | 0.252 |          |       |     | <i>RPLPOP2</i>    | TSS1500 |
| cg26767389 | 13 | 30,594,417  | 1.73E-17 | 0.251 | 0.244 |          |       |     |                   |         |
| cg18944047 | 17 | 72,322,143  | 0.006615 | 0.251 | 0.187 |          |       |     | <i>KIF19</i>      | TSS1500 |
| cg12787405 | 20 | 42,955,658  | 6.63E-05 | 0.251 | 0.244 |          |       |     |                   |         |
| cg03287111 | 2  | 121,625,634 | 4.01E-06 | 0.251 | 0.250 |          |       | Yes | <i>GLI2</i>       | Body    |
| cg09638944 | 3  | 149,424,680 | 1.23E-11 | 0.251 | 0.285 |          |       |     |                   |         |
| cg02672493 | 3  | 136,537,709 | 0.000874 | 0.251 | 0.282 | 1.37E-33 | 0.249 |     | <i>TMEM22</i>     | TSS200  |
| cg03857553 | 22 | 29,976,613  | 0.000205 | 0.251 | 0.138 |          |       |     | <i>NIPSNAP1</i>   | Body    |
| cg24885937 | 11 | 16,898,482  | 0.000568 | 0.251 | 0.224 |          |       |     | <i>PLEKHA7</i>    | Body    |
| cg05875017 | 2  | 233,390,771 | 4.95E-05 | 0.251 | 0.230 |          |       |     | <i>CHRND</i>      | TSS200  |
| cg17186066 | 8  | 80,740,613  | 0.003697 | 0.251 | 0.240 |          |       |     |                   |         |
| cg08196032 | 14 | 95,239,751  | 0.017278 | 0.251 | 0.258 |          |       |     |                   |         |
| cg11739633 | 1  | 156,459,986 | 1.62E-07 | 0.251 | 0.248 |          |       |     | <i>MEF2D</i>      | 5'UTR   |
| cg01612824 | 14 | 56,313,920  | 5.06E-11 | 0.251 | 0.258 |          |       |     |                   |         |
| cg04478905 | 21 | 37,915,091  | 1.08E-12 | 0.251 | 0.226 |          |       |     | <i>CLDN14</i>     | TSS200  |
| cg15531512 | 8  | 123,706,630 | 5.16E-07 | 0.251 | 0.279 |          |       |     |                   |         |
| cg19351026 | 2  | 63,285,425  | 0.010024 | 0.251 | 0.269 |          |       |     |                   |         |
| cg15645287 | 10 | 34,569,552  | 1.04E-05 | 0.251 | 0.254 |          |       |     | <i>PARD3</i>      | Body    |
| cg17823004 | 5  | 34,804,746  | 0.001915 | 0.251 | 0.221 |          |       |     | <i>RAI14</i>      | Body    |
| cg15700437 | 1  | 152,487,844 | 0.003462 | 0.251 | 0.264 |          |       |     | <i>CRCT1</i>      | 5'UTR   |
| cg15264806 | 18 | 59,000,800  | 0.019137 | 0.251 | 0.245 |          |       |     |                   |         |
| cg01597480 | 7  | 120,629,404 | 4.92E-09 | 0.251 | 0.225 |          |       |     | <i>C7orf58</i>    | 5'UTR   |
| cg10635895 | 12 | 2,339,439   | 3.38E-15 | 0.251 | 0.245 |          |       |     | <i>CACNA1C</i>    | Body    |
| cg14928932 | 6  | 33,401,520  | 2.94E-13 | 0.251 | 0.255 |          |       |     | <i>SYNGAP1</i>    | Body    |
| cg16683746 | 8  | 93,113,829  | 0.000288 | 0.251 | 0.279 |          |       |     |                   |         |
| cg22891862 | 10 | 101,279,697 | 3.23E-05 | 0.251 | 0.232 |          |       |     |                   |         |
| cg21239997 | 2  | 24,398,519  | 1.13E-07 | 0.251 | 0.240 |          |       |     | <i>C2orf84</i>    | Body    |
| cg06779449 | 20 | 42,544,663  | 1.28E-07 | 0.251 | 0.249 |          |       |     | <i>TOX2</i>       | TSS200  |
| cg14912728 | 17 | 15,164,634  | 0.006828 | 0.251 | 0.216 |          |       |     | <i>PMP22</i>      | 5'UTR   |
| cg08071609 | 6  | 117,086,040 | 0.000105 | 0.251 | 0.268 |          |       |     | <i>FAM162B</i>    | Body    |

|            |    |             |          |       |       |          |       |  |                   |         |
|------------|----|-------------|----------|-------|-------|----------|-------|--|-------------------|---------|
| cg10123421 | 19 | 11,785,062  | 5.56E-06 | 0.251 | 0.198 |          |       |  | <i>ZNF833</i>     | Body    |
| cg19020855 | 17 | 41,669,266  | 6.44E-16 | 0.251 | 0.248 |          |       |  |                   |         |
| cg03480346 | 2  | 24,232,603  | 0.00856  | 0.251 | 0.159 |          |       |  | <i>MFSD2B</i>     | TSS1500 |
| cg13722700 | 10 | 46,993,502  | 1.48E-08 | 0.251 | 0.236 |          |       |  | <i>GPRIN2</i>     | TSS200  |
| cg15991175 | 3  | 52,313,923  | 2.61E-05 | 0.251 | 0.219 |          |       |  | <i>WDR82</i>      | TSS1500 |
| cg16651877 | 1  | 45,276,338  | 5.53E-15 | 0.251 | 0.250 |          |       |  | <i>BTBD19</i>     | Body    |
| cg18663382 | 6  | 30,418,789  | 0.000103 | 0.251 | 0.252 |          |       |  |                   |         |
| cg14067419 | 9  | 98,783,308  | 0.007673 | 0.251 | 0.196 |          |       |  | <i>NCRNA00092</i> | Body    |
| cg01253160 | 11 | 124,747,172 | 8.02E-05 | 0.251 | 0.301 |          |       |  | <i>ROBO3</i>      | Body    |
| cg04638014 | 4  | 57,371,368  | 0.002734 | 0.251 | 0.278 |          |       |  | <i>ARL9</i>       | TSS200  |
| cg14942424 | 20 | 55,207,002  | 0.000934 | 0.251 | 0.171 |          |       |  | <i>TFAP2C</i>     | Body    |
| cg15008124 | 12 | 114,337,844 | 1.11E-06 | 0.251 | 0.244 |          |       |  | <i>RBM19</i>      | Body    |
| cg00371418 | 17 | 35,014,438  | 0.00376  | 0.251 | 0.191 |          |       |  |                   |         |
| cg04517738 | 8  | 66,196,608  | 0.001137 | 0.251 | 0.263 |          |       |  |                   |         |
| cg08563601 | 2  | 215,675,518 | 3.16E-10 | 0.251 | 0.166 |          |       |  | <i>BARD1</i>      | TSS1500 |
| cg11136654 | 2  | 235,286,867 | 5.84E-07 | 0.251 | 0.273 |          |       |  |                   |         |
| cg12646649 | 10 | 102,987,257 | 0.000158 | 0.251 | 0.270 |          |       |  | <i>LBX1</i>       | Body    |
| cg10552523 | 11 | 313,478     | 8.12E-11 | 0.251 | 0.212 |          |       |  | <i>IFITM1</i>     | TSS1500 |
| cg13066983 | 3  | 68,057,306  | 0.006685 | 0.251 | 0.239 |          |       |  | <i>FAM19A1</i>    | Body    |
| cg13569342 | 12 | 44,255,515  | 3.2E-16  | 0.251 | 0.241 |          |       |  | <i>TMEM117</i>    | Body    |
| cg26768558 | 16 | 88,751,897  | 2.84E-13 | 0.251 | 0.239 |          |       |  | <i>MGC23284</i>   | Body    |
| cg20036706 | 10 | 131,711,529 | 2.91E-13 | 0.251 | 0.242 |          |       |  | <i>EBF3</i>       | Body    |
| cg20848988 | 7  | 36,247,779  | 1.99E-06 | 0.251 | 0.249 |          |       |  | <i>EEDP1</i>      | Body    |
| cg26440142 | 1  | 221,057,573 | 1.05E-14 | 0.251 | 0.229 |          |       |  | <i>HLX</i>        | Body    |
| cg04640675 | 16 | 30,572,739  | 0.006406 | 0.251 | 0.237 |          |       |  |                   |         |
| cg12103037 | 14 | 36,985,711  | 1.79E-05 | 0.251 | 0.265 |          |       |  | <i>NKX2-1</i>     | 3'UTR   |
| cg12880658 | 5  | 115,152,386 | 0.012591 | 0.251 | 0.147 | 6.31E-09 | 0.160 |  | <i>CDO1</i>       | 1stExon |
| cg22670329 | 4  | 74,702,075  | 2.29E-08 | 0.251 | 0.239 | 1.24E-18 | 0.181 |  | <i>CXCL6</i>      | TSS200  |
| cg00376544 | 17 | 6,679,348   | 0.015673 | 0.251 | 0.174 |          |       |  | <i>FBXO39</i>     | TSS1500 |
| cg11472521 | 17 | 48,050,512  | 1.35E-05 | 0.251 | 0.219 |          |       |  | <i>DLX4</i>       | Body    |
| cg26196626 | 8  | 121,989,053 | 1.34E-07 | 0.251 | 0.211 |          |       |  |                   |         |
| cg03133266 | 22 | 23,908,776  | 0.022552 | 0.251 | 0.271 |          |       |  |                   |         |
| cg02282833 | 5  | 32,726,189  | 1.3E-07  | 0.251 | 0.246 |          |       |  | <i>NPR3</i>       | Body    |
| cg02123734 | 10 | 50,649,666  | 4.1E-07  | 0.251 | 0.220 |          |       |  |                   |         |

|            |    |             |          |       |       |          |       |  |                 |         |
|------------|----|-------------|----------|-------|-------|----------|-------|--|-----------------|---------|
| cg03943605 | 10 | 76,818,994  | 8.69E-18 | 0.251 | 0.245 |          |       |  | <i>DUPD1</i>    | TSS1500 |
| cg05347431 | X  | 132,547,568 | 0.007876 | 0.251 | 0.018 |          |       |  | <i>GPC4</i>     | Body    |
| cg13522882 | 2  | 102,316,496 | 0.00118  | 0.251 | 0.234 |          |       |  | <i>MAP4K4</i>   | Body    |
| cg11429044 | 19 | 13,947,473  | 6.46E-08 | 0.251 | 0.256 |          |       |  | <i>MIR23A</i>   | TSS200  |
| cg13476058 | 6  | 28,557,210  | 0.014203 | 0.251 | 0.197 |          |       |  |                 |         |
| cg00240880 | 20 | 43,343,233  | 1.67E-07 | 0.251 | 0.265 | 2.01E-25 | 0.190 |  | <i>WISP2</i>    | TSS1500 |
| cg07660236 | 6  | 28,367,883  | 6.62E-06 | 0.251 | 0.221 |          |       |  | <i>ZSCAN12</i>  | TSS1500 |
| cg08855395 | 1  | 231,296,818 | 0.00163  | 0.251 | 0.259 |          |       |  |                 |         |
| cg21028946 | 20 | 34,680,004  | 5.14E-10 | 0.251 | 0.188 |          |       |  |                 |         |
| cg13106484 | 7  | 157,692,127 | 7.21E-11 | 0.251 | 0.254 |          |       |  | <i>PTPRN2</i>   | Body    |
| cg00201414 | 13 | 52,769,768  | 0.000271 | 0.251 | 0.295 |          |       |  | <i>THSD1P</i>   | TSS1500 |
| cg04304802 | 10 | 73,499,965  | 8.54E-05 | 0.251 | 0.233 |          |       |  | <i>CDH23</i>    | Body    |
| cg26988215 | 2  | 31,361,757  | 0.038388 | 0.251 | 0.137 |          |       |  | <i>GALNT14</i>  | TSS200  |
| cg15531433 | 10 | 1,639,090   | 1.61E-33 | 0.251 | 0.233 |          |       |  | <i>ADARB2</i>   | Body    |
| cg26839871 | 1  | 171,811,299 | 0.00791  | 0.251 | 0.150 |          |       |  | <i>DNM3</i>     | Body    |
| cg09626521 | 3  | 113,933,104 | 0.030639 | 0.251 | 0.133 |          |       |  |                 |         |
| cg16678099 | 17 | 40,250,199  | 0.003902 | 0.251 | 0.270 |          |       |  |                 |         |
| cg26991025 | 15 | 99,091,228  | 1.08E-05 | 0.251 | 0.230 |          |       |  |                 |         |
| cg18946473 | 2  | 97,152,025  | 0.001116 | 0.251 | 0.236 |          |       |  |                 |         |
| cg04213841 | 13 | 49,792,685  | 0.00188  | 0.251 | 0.215 |          |       |  |                 |         |
| cg01024668 | 15 | 69,099,680  | 9.91E-15 | 0.251 | 0.246 |          |       |  | <i>C15orf28</i> | TSS1500 |
| cg11147278 | 10 | 34,062,234  | 0.002177 | 0.251 | 0.243 |          |       |  |                 |         |
| cg18152523 | 11 | 93,063,302  | 0.009154 | 0.251 | 0.152 |          |       |  | <i>CCDC67</i>   | TSS1500 |
| cg17215278 | 1  | 117,114,263 | 4.15E-10 | 0.250 | 0.224 |          |       |  | <i>CD58</i>     | TSS1500 |
| cg01142676 | 11 | 117,695,591 | 0.003541 | 0.250 | 0.267 |          |       |  | <i>FXYD2</i>    | Body    |
| cg17918558 | 1  | 46,945,595  | 3.82E-11 | 0.250 | 0.248 |          |       |  |                 |         |
| cg04807106 | 3  | 124,103,560 | 1.54E-08 | 0.250 | 0.218 |          |       |  | <i>KALRN</i>    | Body    |
| cg11362604 | 15 | 37,389,585  | 1.87E-05 | 0.250 | 0.292 |          |       |  | <i>MEIS2</i>    | Body    |
| cg21292068 | 7  | 127,907,884 | 7.6E-19  | 0.250 | 0.248 |          |       |  |                 |         |
| cg09010707 | 12 | 26,392,567  | 2.62E-07 | 0.250 | 0.261 |          |       |  |                 |         |
| cg15878670 | 12 | 49,485,085  | 8.37E-05 | 0.250 | 0.220 |          |       |  | <i>DHH</i>      | Body    |
| cg19885037 | 3  | 4,762,242   | 0.000928 | 0.250 | 0.095 |          |       |  | <i>ITPR1</i>    | Body    |
| cg06523744 | 22 | 39,410,145  | 4.96E-05 | 0.250 | 0.236 |          |       |  | <i>APOBEC3C</i> | TSS200  |
| cg06026136 | 6  | 27,173,753  | 0.010148 | 0.250 | 0.261 |          |       |  |                 |         |

|            |    |             |          |       |       |          |       |     |                 |         |
|------------|----|-------------|----------|-------|-------|----------|-------|-----|-----------------|---------|
| cg05867448 | X  | 130,192,575 | 0.044381 | 0.250 | 0.189 |          |       |     | <i>FLJ30058</i> | 5'UTR   |
| cg07919443 | 10 | 102,419,409 | 0.000754 | 0.250 | 0.264 |          |       |     |                 |         |
| cg13033814 | 6  | 31,830,035  | 0.017879 | 0.250 | 0.191 |          |       |     | <i>NEU1</i>     | Body    |
| cg13466694 | 9  | 129,380,728 | 9.38E-09 | 0.250 | 0.248 |          |       |     | <i>LMX1B</i>    | Body    |
| cg03963219 | 2  | 84,709,147  | 5.11E-12 | 0.250 | 0.244 |          |       |     |                 |         |
| cg04353483 | 4  | 26,493,496  | 1.86E-09 | 0.250 | 0.237 | 1.74E-11 | 0.171 |     | <i>CCKAR</i>    | TSS1500 |
| cg24770624 | 2  | 20,068,871  | 0.01826  | 0.250 | 0.106 |          |       |     |                 |         |
| cg01911077 | 11 | 64,531,743  | 6.17E-12 | 0.250 | 0.247 |          |       |     |                 |         |
| cg13762082 | 5  | 31,640,096  | 1.59E-05 | 0.250 | 0.236 |          |       |     |                 |         |
| cg14016177 | 9  | 131,965,610 | 0.000643 | 0.250 | 0.166 |          |       |     |                 |         |
| cg24752267 | 20 | 20,352,002  | 0.000266 | 0.250 | 0.189 |          |       |     |                 |         |
| cg04111071 | 7  | 19,813,299  | 0.003839 | 0.250 | 0.250 |          |       |     | <i>TMEM196</i>  | TSS1500 |
| cg05200628 | 1  | 160,681,760 | 0.004955 | 0.250 | 0.264 |          |       |     | <i>CD48</i>     | TSS200  |
| cg00096104 | 13 | 100,547,897 | 0.001189 | 0.250 | 0.231 |          |       |     | <i>CLYBL</i>    | 3'UTR   |
| cg08813925 | 10 | 31,996,740  | 0.019172 | 0.250 | 0.271 |          |       |     |                 |         |
| cg02798394 | 2  | 19,974,694  | 5.43E-13 | 0.250 | 0.222 |          |       |     |                 |         |
| cg03655683 | 2  | 63,281,383  | 4.91E-05 | 0.250 | 0.228 |          |       |     | <i>OTX1</i>     | Body    |
| cg00954841 | 12 | 3,373,534   | 2.94E-08 | 0.250 | 0.211 |          |       |     | <i>TSPAN9</i>   | Body    |
| cg06397161 | 22 | 39,760,059  | 1.34E-16 | 0.250 | 0.243 |          |       | Yes | <i>SYNGR1</i>   | Body    |
| cg17406383 | 17 | 71,948,506  | 6.6E-14  | 0.250 | 0.222 |          |       |     |                 |         |
| cg20395789 | 11 | 107,570,881 | 2.91E-14 | 0.250 | 0.252 |          |       |     |                 |         |
| cg07484739 | 2  | 177,356,020 | 4.53E-08 | 0.250 | 0.210 |          |       |     |                 |         |
| cg07581883 | 3  | 125,676,865 | 0.00029  | 0.250 | 0.194 |          |       |     |                 |         |
| cg20971970 | 12 | 57,632,495  | 1.64E-07 | 0.250 | 0.253 |          |       |     | <i>NDUFA4L2</i> | 5'UTR   |
| cg03171003 | 2  | 111,875,934 | 9.25E-06 | 0.250 | 0.262 |          |       |     |                 |         |
| cg13808012 | 1  | 244,094,935 | 9.84E-15 | 0.250 | 0.224 |          |       |     |                 |         |
| cg24160421 | 8  | 48,675,771  | 0.00022  | 0.250 | 0.186 |          |       |     |                 |         |
| cg07450037 | 7  | 27,135,147  | 2.06E-07 | 0.250 | 0.239 |          |       |     | <i>HOXA1</i>    | Body    |
| cg26019295 | 12 | 54,409,212  | 0.039463 | 0.250 | 0.256 |          |       |     | <i>HOXC4</i>    | TSS1500 |
| cg24581462 | 8  | 38,759,627  | 0.000646 | 0.250 | 0.192 |          |       |     | <i>PLEKHA2</i>  | 5'UTR   |
| cg08194879 | 6  | 123,317,569 | 0.010602 | 0.250 | 0.234 |          |       |     | <i>CLVS2</i>    | TSS200  |
| cg24467349 | 1  | 110,254,835 | 8.66E-06 | 0.250 | 0.256 |          |       |     | <i>GSTM5</i>    | TSS200  |
| cg01961105 | 16 | 54,968,783  | 0.007915 | 0.250 | 0.317 |          |       |     |                 |         |
| cg03689092 | 2  | 128,439,345 | 7.59E-16 | 0.250 | 0.263 |          |       |     | <i>LIMS2</i>    | 1stExon |



|            |    |             |          |       |       |  |     |  |                |         |
|------------|----|-------------|----------|-------|-------|--|-----|--|----------------|---------|
| cg00222341 | 15 | 83,951,913  | 0.000256 | 0.250 | 0.240 |  |     |  | <i>BNC1</i>    | Body    |
| cg25365014 | 5  | 2,727,713   | 1.33E-05 | 0.250 | 0.266 |  |     |  |                |         |
| cg17353698 | 6  | 31,831,599  | 0.001514 | 0.250 | 0.202 |  |     |  | <i>NEU1</i>    | TSS1500 |
| cg05438378 | 15 | 67,383,736  | 1.64E-05 | 0.250 | 0.233 |  |     |  | <i>SMAD3</i>   | Body    |
| cg01748627 | 11 | 67,272,202  | 0.001245 | 0.250 | 0.144 |  |     |  | <i>PITPNM1</i> | 5'UTR   |
| cg04780086 | 2  | 111,875,790 | 0.000102 | 0.250 | 0.256 |  |     |  | <i>ACOXL</i>   | 3'UTR   |
| cg27560796 | 6  | 33,864,689  | 4.28E-11 | 0.250 | 0.195 |  |     |  |                |         |
| cg05208605 | 11 | 116,451,437 | 1.85E-05 | 0.250 | 0.237 |  |     |  |                |         |
| cg15056105 | 18 | 13,611,489  | 0.000299 | 0.250 | 0.206 |  |     |  | <i>C18orf1</i> | TSS200  |
| cg21611682 | 11 | 68,138,269  | 1.22E-05 | 0.250 | 0.219 |  |     |  | <i>LRP5</i>    | Body    |
| cg02976588 | 1  | 150,135,546 | 0.006955 | 0.250 | 0.311 |  |     |  |                |         |
| cg14062261 | 7  | 156,736,159 | 0.000247 | 0.250 | 0.292 |  |     |  |                |         |
| cg21699894 | 20 | 42,545,443  | 1.93E-07 | 0.250 | 0.228 |  |     |  | <i>TOX2</i>    | 5'UTR   |
| cg23237314 | 6  | 29,894,197  | 1.75E-06 | 0.250 | 0.240 |  |     |  | <i>HCG4P6</i>  | TSS1500 |
| cg20556402 | 6  | 41,616,858  | 1.35E-10 | 0.250 | 0.248 |  |     |  | <i>MDFI</i>    | Body    |
| cg07546293 | 16 | 851,255     | 0.000125 | 0.250 | 0.236 |  | Yes |  | <i>GNG13</i>   | TSS1500 |
| cg20161791 | 7  | 2,558,431   | 1.57E-07 | 0.250 | 0.257 |  |     |  | <i>LFNG</i>    | Body    |
| cg01161204 | 11 | 115,530,932 | 3.43E-07 | 0.250 | 0.233 |  |     |  |                |         |
| cg06323896 | 16 | 85,410,525  | 7.25E-09 | 0.250 | 0.244 |  |     |  |                |         |
| cg00897875 | 17 | 43,392,165  | 0.000157 | 0.250 | 0.200 |  |     |  | <i>MAP3K14</i> | 5'UTR   |
| cg02055540 | 5  | 165,510,804 | 6.82E-11 | 0.250 | 0.210 |  |     |  |                |         |
| cg22354646 | 3  | 58,550,723  | 0.001731 | 0.250 | 0.266 |  |     |  | <i>FAM107A</i> | 3'UTR   |
| cg04500239 | 1  | 118,502,178 | 2.39E-06 | 0.250 | 0.233 |  |     |  | <i>WDR3</i>    | 3'UTR   |
| cg07063883 | 16 | 3,079,953   | 8.52E-43 | 0.250 | 0.246 |  |     |  | <i>CCDC64B</i> | Body    |
| cg13523576 | 8  | 21,909,636  | 2.36E-15 | 0.250 | 0.248 |  |     |  | <i>EPB49</i>   | TSS1500 |
| cg26508444 | 10 | 126,330,845 | 7.21E-12 | 0.250 | 0.226 |  |     |  | <i>FAM53B</i>  | Body    |
| cg27302263 | 15 | 66,915,218  | 1.38E-06 | 0.250 | 0.311 |  |     |  |                |         |
| cg02730492 | 13 | 110,874,299 | 5.6E-05  | 0.250 | 0.248 |  |     |  | <i>COL4A1</i>  | Body    |
| cg05123976 | 17 | 45,949,677  | 7.27E-08 | 0.250 | 0.233 |  |     |  |                |         |
| cg06081199 | 7  | 117,120,064 | 4.63E-06 | 0.250 | 0.227 |  |     |  | <i>CFTR</i>    | 1stExon |
| cg13643594 | X  | 107,681,825 | 5.76E-10 | 0.250 | 0.230 |  |     |  | <i>COL4A5</i>  | TSS1500 |
| cg22828581 | 9  | 93,880,502  | 0.000969 | 0.250 | 0.199 |  |     |  |                |         |
| cg26927190 | 17 | 76,875,678  | 1.76E-07 | 0.250 | 0.252 |  |     |  | <i>TIMP2</i>   | Body    |
| cg09123188 | 15 | 100,913,934 | 8.25E-05 | 0.250 | 0.188 |  |     |  |                |         |

|            |    |             |          |       |       |          |       |  |                 |         |
|------------|----|-------------|----------|-------|-------|----------|-------|--|-----------------|---------|
| cg00093643 | 15 | 44,579,510  | 7.84E-16 | 0.250 | 0.257 |          |       |  | <i>CASC4</i>    | TSS1500 |
| cg15474402 | 4  | 188,953,969 | 1.22E-06 | 0.250 | 0.265 |          |       |  |                 |         |
| cg16704246 | 10 | 112,594,670 | 1.13E-15 | 0.250 | 0.234 |          |       |  | <i>RBM20</i>    | Body    |
| cg21415530 | 8  | 140,715,802 | 3.62E-05 | 0.250 | 0.278 |          |       |  | <i>KCNK9</i>    | TSS1500 |
| cg01219426 | 11 | 95,856,658  | 9.41E-09 | 0.250 | 0.206 |          |       |  | <i>MAML2</i>    | Body    |
| cg09069072 | 1  | 15,482,753  | 1.58E-09 | 0.250 | 0.264 |          |       |  | <i>TMEM51</i>   | 5'UTR   |
| cg23424407 | 12 | 115,131,846 | 1.87E-11 | 0.250 | 0.252 |          |       |  |                 |         |
| cg01683794 | 14 | 97,059,349  | 0.00143  | 0.250 | 0.204 |          |       |  |                 |         |
| cg23118086 | 15 | 65,360,058  | 0.001766 | 0.250 | 0.259 |          |       |  | <i>RASL12</i>   | Body    |
| cg23900203 | 12 | 127,765,331 | 0.020208 | 0.250 | 0.216 |          |       |  |                 |         |
| cg01078408 | 6  | 3,232,129   | 0.004586 | 0.250 | 0.167 |          |       |  |                 |         |
| cg08936706 | 3  | 46,906,385  | 1.15E-07 | 0.250 | 0.260 |          |       |  | <i>MYL3</i>     | TSS1500 |
| cg09511190 | 17 | 33,416,862  | 5.81E-07 | 0.250 | 0.199 |          |       |  | <i>RFFL</i>     | TSS1500 |
| cg13725826 | 14 | 100,211,213 | 9.2E-06  | 0.250 | 0.263 |          |       |  |                 |         |
| cg23730575 | 6  | 27,799,385  | 0.001636 | 0.250 | 0.209 |          |       |  | <i>HIST1H4K</i> | TSS200  |
| cg08095452 | 17 | 55,958,800  | 2.9E-18  | 0.250 | 0.235 |          |       |  | <i>CUEDC1</i>   | Body    |
| cg16232183 | 13 | 96,204,854  | 0.020725 | 0.250 | 0.248 |          |       |  | <i>CLDN10</i>   | TSS200  |
| cg20039443 | 20 | 50,108,912  | 1.26E-08 | 0.250 | 0.250 |          |       |  | <i>NFATC2</i>   | Body    |
| cg25799059 | 3  | 45,134,300  | 1.34E-05 | 0.250 | 0.224 |          |       |  | <i>CDCP1</i>    | Body    |
| cg26081841 | 5  | 87,441,969  | 0.000992 | 0.250 | 0.301 |          |       |  |                 |         |
| cg26906629 | 11 | 68,564,367  | 5.11E-09 | 0.250 | 0.256 |          |       |  | <i>CPT1A</i>    | Body    |
| cg10770742 | 7  | 151,107,285 | 0.040298 | 0.250 | 0.351 |          |       |  | <i>WDR86</i>    | TSS200  |
| cg09942999 | 1  | 32,707,389  | 8.45E-05 | 0.250 | 0.179 |          |       |  | <i>MTMR9L</i>   | TSS200  |
| cg24683222 | 4  | 41,880,440  | 2.74E-10 | 0.250 | 0.249 |          |       |  |                 |         |
| cg16293656 | 8  | 21,900,438  | 9.26E-05 | 0.250 | 0.195 | 5.15E-15 | 0.140 |  | <i>FGF17</i>    | 5'UTR   |
| cg08781365 | 16 | 85,320,072  | 4.35E-08 | 0.250 | 0.245 |          |       |  |                 |         |
| cg18717967 | 8  | 8,182,747   | 1.66E-24 | 0.250 | 0.241 |          |       |  | <i>PRAGMIN</i>  | Body    |
| cg09161043 | 1  | 53,068,834  | 1.6E-13  | 0.250 | 0.240 |          |       |  | <i>GPX7</i>     | Body    |
| cg09715285 | 2  | 220,108,267 | 0.004657 | 0.250 | 0.165 |          |       |  | <i>GLB1L</i>    | Body    |
| cg12717533 | 2  | 26,397,154  | 1.39E-07 | 0.250 | 0.220 |          |       |  | <i>FAM59B</i>   | Body    |
| cg07937271 | 4  | 13,542,719  | 0.001872 | 0.250 | 0.255 |          |       |  | <i>NKX3-2</i>   | 3'UTR   |
| cg10350722 | 12 | 3,490,214   | 1.88E-09 | 0.250 | 0.255 |          |       |  |                 |         |
| cg03100639 | 16 | 31,483,137  | 6.23E-10 | 0.250 | 0.210 |          |       |  | <i>TGFB11I</i>  | TSS1500 |
| cg10281996 | 11 | 69,290,977  | 9.56E-21 | 0.250 | 0.236 |          |       |  |                 |         |

|            |    |             |          |       |       |          |       |  |                 |         |
|------------|----|-------------|----------|-------|-------|----------|-------|--|-----------------|---------|
| cg24702341 | 7  | 73,895,278  | 1.25E-08 | 0.250 | 0.235 |          |       |  | <i>GTF2IRD1</i> | 5'UTR   |
| cg11520719 | 6  | 157,391,679 | 5.76E-21 | 0.250 | 0.236 |          |       |  | <i>ARID1B</i>   | Body    |
| cg17427491 | 7  | 190,423     | 1.21E-13 | 0.250 | 0.219 |          |       |  |                 |         |
| cg26366091 | 1  | 111,770,274 | 9.69E-05 | 0.250 | 0.244 | 5.31E-10 | 0.162 |  | <i>CHI3L2</i>   | TSS200  |
| cg15058210 | 2  | 240,196,877 | 2.37E-06 | 0.250 | 0.218 |          |       |  | <i>HDAC4</i>    | Body    |
| cg23870587 | 14 | 91,060,122  | 2.9E-09  | 0.250 | 0.236 |          |       |  | <i>TTC7B</i>    | Body    |
| cg12052765 | 10 | 50,816,963  | 0.038321 | 0.250 | 0.310 | 2.7E-22  | 0.190 |  | <i>SLC18A3</i>  | TSS1500 |
| cg20624391 | 6  | 105,584,149 | 0.033983 | 0.250 | 0.127 | 1.33E-11 | 0.181 |  | <i>BVES</i>     | 5'UTR   |
| cg02300379 | 10 | 95,536,738  | 5.73E-05 | 0.250 | 0.246 |          |       |  | <i>LGI1</i>     | Body    |
| cg08350549 | 3  | 99,591,722  | 1.01E-09 | 0.250 | 0.189 |          |       |  | <i>C3orf26</i>  | Body    |
| cg17154395 | 17 | 37,752,605  | 0.008004 | 0.250 | 0.232 |          |       |  |                 |         |
| cg26020069 | 6  | 52,382,441  | 1.18E-06 | 0.250 | 0.297 |          |       |  | <i>TRAM2</i>    | Body    |
| cg05241461 | 19 | 22,816,980  | 0.017881 | 0.250 | 0.247 |          |       |  | <i>ZNF492</i>   | TSS200  |
| cg15677364 | 6  | 30,687,221  | 5.25E-08 | 0.250 | 0.229 |          |       |  | <i>TUBB</i>     | TSS1500 |
| cg20068058 | 11 | 46,317,859  | 3.69E-09 | 0.250 | 0.243 |          |       |  | <i>CREB3L1</i>  | Body    |
| cg15914863 | 7  | 1,022,675   | 6.48E-19 | 0.250 | 0.234 | 4.28E-21 | 0.173 |  | <i>CYP2W1</i>   | TSS200  |
| cg19428417 | 16 | 66,959,729  | 1.93E-08 | 0.250 | 0.234 | 2.88E-21 | 0.161 |  | <i>RRAD</i>     | TSS1500 |
| cg08048268 | 3  | 133,502,702 | 0.003876 | 0.250 | 0.271 |          |       |  |                 |         |
| cg00890208 | 9  | 37,025,102  | 1.63E-07 | 0.250 | 0.211 |          |       |  | <i>PAX5</i>     | Body    |
| cg06564232 | 6  | 50,810,993  | 0.001699 | 0.250 | 0.305 |          |       |  | <i>TFAP2B</i>   | Body    |
| cg19423543 | 5  | 172,655,948 | 0.000541 | 0.250 | 0.256 |          |       |  |                 |         |
| cg20386487 | 15 | 96,898,045  | 0.00123  | 0.250 | 0.263 |          |       |  |                 |         |
| cg21433125 | 7  | 18,535,786  | 0.003436 | 0.250 | 0.206 |          |       |  | <i>HDAC9</i>    | TSS200  |
| cg02058267 | 14 | 76,605,088  | 0.009339 | 0.250 | 0.223 |          |       |  |                 |         |
| cg07739369 | 17 | 80,241,456  | 3.61E-10 | 0.250 | 0.227 |          |       |  |                 |         |
| cg14558529 | 6  | 27,648,341  | 0.00173  | 0.250 | 0.294 |          |       |  |                 |         |
| cg17297305 | 1  | 185,287,148 | 1.31E-06 | 0.250 | 0.211 |          |       |  | <i>IVNS1ABP</i> | TSS1500 |
| cg02839593 | 16 | 66,934,539  | 2.35E-20 | 0.250 | 0.231 |          |       |  |                 |         |
| cg15885337 | 11 | 132,813,819 | 0.035742 | 0.250 | 0.326 |          |       |  | <i>OPCML</i>    | TSS1500 |
| cg03351003 | 16 | 75,272,306  | 4.33E-16 | 0.250 | 0.235 |          |       |  | <i>BCAR1</i>    | Body    |
| cg26378982 | 2  | 11,053,937  | 1.53E-62 | 0.250 | 0.241 |          |       |  | <i>KCNF1</i>    | 1stExon |
| cg12338417 | 3  | 32,860,178  | 0.006888 | 0.250 | 0.196 |          |       |  | <i>TRIM71</i>   | 1stExon |
| cg08891071 | 5  | 150,399,909 | 0.00014  | 0.250 | 0.141 |          |       |  | <i>GPX3</i>     | TSS200  |
| cg24860534 | 1  | 227,506,868 | 0.01116  | 0.250 | 0.121 | 2.75E-16 | 0.160 |  | <i>CDC42BPA</i> | TSS1500 |

|             |    |             |          |       |       |  |  |     |                 |         |
|-------------|----|-------------|----------|-------|-------|--|--|-----|-----------------|---------|
| cg16450577  | 17 | 80,806,375  | 2.88E-07 | 0.250 | 0.279 |  |  | Yes | <i>TBCD</i>     | Body    |
| cg07447868  | X  | 17,395,220  | 0.006183 | 0.250 | 0.156 |  |  |     | <i>NHS</i>      | Body    |
| cg06128608  | 9  | 136,834,256 | 2.79E-17 | 0.250 | 0.226 |  |  |     | <i>VAV2</i>     | Body    |
| cg14657834  | 8  | 67,875,441  | 0.000514 | 0.250 | 0.247 |  |  |     |                 |         |
| cg15983026  | 7  | 155,325,552 | 3.18E-08 | 0.249 | 0.237 |  |  |     | <i>CNPY1</i>    | 5'UTR   |
| cg02213260  | 14 | 23,834,995  | 4.24E-36 | 0.249 | 0.226 |  |  |     | <i>EFS</i>      | TSS200  |
| cg25666919  | 7  | 102,074,615 | 0.001578 | 0.249 | 0.128 |  |  |     | <i>ORAI2</i>    | 5'UTR   |
| cg23467008  | 6  | 152,128,537 | 0.018011 | 0.249 | 0.154 |  |  |     | <i>ESR1</i>     | TSS1500 |
| cg05913906  | 6  | 30,923,370  | 0.013311 | 0.249 | 0.325 |  |  |     |                 |         |
| cg00050375  | 6  | 43,404,828  | 6.22E-08 | 0.249 | 0.245 |  |  |     | <i>ABCC10</i>   | Body    |
| cg03115558  | 10 | 72,200,789  | 9.42E-05 | 0.249 | 0.261 |  |  |     | <i>NODAL</i>    | Body    |
| cg17200137  | 10 | 48,416,896  | 3.29E-19 | 0.249 | 0.249 |  |  |     | <i>GDF2</i>     | TSS200  |
| cg21857598  | 5  | 66,492,721  | 1.13E-05 | 0.249 | 0.252 |  |  |     | <i>CD180</i>    | TSS200  |
| cg21890239  | X  | 136,509,643 | 0.047397 | 0.249 | 0.274 |  |  |     |                 |         |
| cg14003627  | 9  | 123,204,555 | 3.27E-33 | 0.249 | 0.248 |  |  |     | <i>CDK5RAP2</i> | Body    |
| cg18103859  | 14 | 61,110,002  | 6.69E-06 | 0.249 | 0.263 |  |  |     |                 |         |
| cg04685442  | 8  | 49,776,492  | 8.9E-13  | 0.249 | 0.259 |  |  |     |                 |         |
| cg00473633  | 17 | 75,260,903  | 0.00019  | 0.249 | 0.285 |  |  |     |                 |         |
| cg06604589  | 17 | 800,512     | 1.41E-06 | 0.249 | 0.221 |  |  |     | <i>NXN</i>      | Body    |
| cg13850606  | 1  | 229,543,554 | 0.025966 | 0.249 | 0.330 |  |  |     |                 |         |
| cg06022664  | 15 | 69,136,313  | 0.029629 | 0.249 | 0.257 |  |  |     | <i>MIR548H4</i> | Body    |
| cg19709468  | 20 | 21,082,942  | 0.015879 | 0.249 | 0.302 |  |  |     |                 |         |
| cg00044097  | 2  | 106,055,153 | 1.36E-09 | 0.249 | 0.247 |  |  |     | <i>FHL2</i>     | 1stExon |
| cg20355301  | 9  | 97,848,107  | 1.68E-05 | 0.249 | 0.223 |  |  |     | <i>C9orf3</i>   | 3'UTR   |
| cg17221315  | 6  | 27,791,827  | 0.01442  | 0.249 | 0.187 |  |  |     | <i>HIST1H4J</i> | TSS200  |
| cg01644731  | 12 | 58,236,712  | 1.23E-29 | 0.249 | 0.252 |  |  |     | <i>CTDSP2</i>   | Body    |
| cg09543255  | 3  | 170,302,640 | 0.013445 | 0.249 | 0.337 |  |  |     | <i>SLC7A14</i>  | 5'UTR   |
| cg07017214  | 6  | 30,433,749  | 0.001175 | 0.249 | 0.229 |  |  |     |                 |         |
| cg01521220  | 17 | 46,233,799  | 1.88E-09 | 0.249 | 0.224 |  |  |     | <i>MIR1203</i>  | Body    |
| cg08271229  | 1  | 2,222,674   | 1.25E-06 | 0.249 | 0.248 |  |  |     | <i>SKI</i>      | Body    |
| cg07727170  | 15 | 70,458,214  | 3.01E-18 | 0.249 | 0.250 |  |  |     |                 |         |
| cg08235161  | 14 | 57,262,049  | 2.17E-06 | 0.249 | 0.243 |  |  |     |                 |         |
| cg11425788  | 1  | 60,136,100  | 2.43E-08 | 0.249 | 0.261 |  |  |     | <i>FGGY</i>     | Body    |
| cg151105476 | 6  | 1,335,849   | 0.000908 | 0.249 | 0.161 |  |  | Yes |                 |         |

|            |    |             |          |       |       |          |       |  |                |         |
|------------|----|-------------|----------|-------|-------|----------|-------|--|----------------|---------|
| cg18977727 | 22 | 37,952,950  | 1.53E-07 | 0.249 | 0.279 |          |       |  |                |         |
| cg20491914 | 2  | 26,915,349  | 0.001776 | 0.249 | 0.166 |          |       |  | <i>KCNK3</i>   | TSS1500 |
| cg07023704 | 2  | 172,965,890 | 1.32E-06 | 0.249 | 0.254 |          |       |  | <i>DLX2</i>    | Body    |
| cg03297783 | 3  | 50,378,664  | 0.000309 | 0.249 | 0.257 |          |       |  | <i>RASSF1</i>  | TSS1500 |
| cg16342439 | 3  | 126,006,835 | 0.012669 | 0.249 | 0.148 |          |       |  |                |         |
| cg11412288 | 6  | 117,802,725 | 1.38E-05 | 0.249 | 0.259 |          |       |  | <i>DCBLD1</i>  | TSS1500 |
| cg13241681 | 13 | 114,187,990 | 2.81E-05 | 0.249 | 0.261 |          |       |  | <i>TMCO3</i>   | Body    |
| cg20321153 | 1  | 63,795,435  | 2.54E-06 | 0.249 | 0.269 |          |       |  |                |         |
| cg00980058 | 1  | 233,248,709 | 1.12E-09 | 0.249 | 0.252 |          |       |  | <i>PCNXL2</i>  | Body    |
| cg19049194 | 2  | 175,193,754 | 0.000286 | 0.249 | 0.220 |          |       |  |                |         |
| cg12287358 | 6  | 29,796,032  | 0.010479 | 0.249 | 0.289 |          |       |  | <i>HLA-G</i>   | Body    |
| cg20670679 | 7  | 157,561,786 | 1.53E-08 | 0.249 | 0.249 |          |       |  | <i>PTPRN2</i>  | Body    |
| cg23040305 | 1  | 183,846,243 | 2.34E-10 | 0.249 | 0.270 |          |       |  | <i>RGL1</i>    | Body    |
| cg22129545 | 2  | 27,531,320  | 1.78E-18 | 0.249 | 0.261 |          |       |  | <i>UCN</i>     | TSS200  |
| cg10985145 | 5  | 135,227,049 | 4.64E-20 | 0.249 | 0.236 |          |       |  |                |         |
| cg20731469 | 6  | 108,495,678 | 3.27E-05 | 0.249 | 0.252 |          |       |  | <i>NR2E1</i>   | Body    |
| cg00025496 | 17 | 1,057,343   | 0.020372 | 0.249 | 0.296 |          |       |  | <i>ABR</i>     | Body    |
| cg20245822 | 12 | 104,734,362 | 1.89E-15 | 0.249 | 0.237 |          |       |  | <i>TXNRD1</i>  | Body    |
| cg00040455 | X  | 30,326,676  | 0.016416 | 0.249 | 0.375 |          |       |  | <i>NROB1</i>   | 1stExon |
| cg07414961 | 17 | 70,587,753  | 0.004596 | 0.249 | 0.055 |          |       |  |                |         |
| cg11428724 | 1  | 18,957,632  | 0.047915 | 0.249 | 0.181 | 3.01E-14 | 0.173 |  | <i>PAX7</i>    | 5'UTR   |
| cg13932501 | 9  | 94,060,853  | 0.000329 | 0.249 | 0.262 |          |       |  | <i>AUH</i>     | Body    |
| cg20132775 | 3  | 142,444,202 | 8.97E-06 | 0.249 | 0.241 |          |       |  | <i>TRPC1</i>   | Body    |
| cg23871507 | 6  | 44,528,765  | 7.83E-20 | 0.249 | 0.226 |          |       |  |                |         |
| cg26984805 | 10 | 71,176,501  | 7.58E-13 | 0.249 | 0.239 | 9.44E-22 | 0.177 |  | <i>TACR2</i>   | 1stExon |
| cg04571189 | 2  | 10,638,072  | 0.00045  | 0.249 | 0.214 |          |       |  |                |         |
| cg21604450 | 1  | 66,998,563  | 4.58E-05 | 0.249 | 0.193 |          |       |  | <i>SGIP1</i>   | TSS1500 |
| cg24844534 | 17 | 77,020,267  | 0.004739 | 0.249 | 0.215 | 9.53E-24 | 0.195 |  | <i>C1QTNF1</i> | 1stExon |
| cg16751451 | 7  | 55,086,091  | 1.47E-11 | 0.249 | 0.208 |          |       |  | <i>EGFR</i>    | TSS1500 |
| cg18803306 | 20 | 623,421     | 7.76E-05 | 0.249 | 0.169 |          |       |  |                |         |
| cg00394180 | 8  | 97,167,170  | 0.000254 | 0.249 | 0.244 |          |       |  | <i>GDF6</i>    | Body    |
| cg22727783 | 5  | 14,441,074  | 0.000236 | 0.249 | 0.220 |          |       |  | <i>TRIO</i>    | Body    |
| cg26507725 | 11 | 69,987,633  | 7.8E-15  | 0.249 | 0.269 |          |       |  | <i>ANO1</i>    | Body    |
| cg14752336 | 10 | 106,400,454 | 0.002552 | 0.249 | 0.173 |          |       |  | <i>SORCS3</i>  | TSS1500 |

|            |    |             |          |       |       |          |       |  |                |         |
|------------|----|-------------|----------|-------|-------|----------|-------|--|----------------|---------|
| cg02149446 | 19 | 47,812,519  | 1.57E-09 | 0.249 | 0.263 | 8.79E-21 | 0.214 |  | <i>C5AR1</i>   | TSS1500 |
| cg09820180 | 6  | 140,168,822 | 4.22E-05 | 0.249 | 0.262 |          |       |  |                |         |
| cg03619352 | 5  | 179,219,098 | 1.07E-05 | 0.249 | 0.271 |          |       |  |                |         |
| cg05729200 | 2  | 102,091,321 | 1.53E-10 | 0.249 | 0.226 |          |       |  | <i>RFX8</i>    | TSS200  |
| cg27638615 | 2  | 202,901,352 | 4.25E-08 | 0.249 | 0.228 |          |       |  | <i>FZD7</i>    | 1stExon |
| cg03740167 | 10 | 23,463,746  | 0.000396 | 0.249 | 0.275 |          |       |  |                |         |
| cg12007166 | 6  | 30,228,058  | 0.000282 | 0.249 | 0.214 |          |       |  | <i>HLA-L</i>   | Body    |
| cg14231297 | 19 | 58,629,901  | 0.014008 | 0.249 | 0.284 |          |       |  | <i>ZSCAN18</i> | TSS200  |
| cg19416570 | 19 | 58,715,677  | 2.57E-13 | 0.249 | 0.248 |          |       |  | <i>ZNF274</i>  | Body    |
| cg10002915 | 4  | 149,369,175 | 5E-10    | 0.249 | 0.229 |          |       |  |                |         |
| cg16440442 | 5  | 149,980,671 | 1.76E-05 | 0.249 | 0.251 |          |       |  | <i>SYNPO</i>   | 1stExon |
| cg15249639 | 12 | 4,382,174   | 0.023799 | 0.249 | 0.236 |          |       |  | <i>CCND2</i>   | TSS1500 |
| cg04377609 | 3  | 9,358,914   | 0.000123 | 0.249 | 0.184 |          |       |  |                |         |
| cg14467181 | 17 | 47,516,312  | 0.000754 | 0.249 | 0.289 |          |       |  |                |         |
| cg17649293 | 2  | 71,134,791  | 0.002287 | 0.249 | 0.182 |          |       |  | <i>VAX2</i>    | Body    |
| cg00310215 | 16 | 51,185,346  | 0.002118 | 0.249 | 0.177 |          |       |  | <i>SALL1</i>   | TSS1500 |
| cg11201751 | 16 | 85,158,047  | 8.47E-15 | 0.249 | 0.265 |          |       |  |                |         |
| cg26342637 | 20 | 43,743,872  | 5.18E-11 | 0.249 | 0.253 |          |       |  | <i>WFDC5</i>   | TSS200  |
| cg04314624 | 6  | 28,458,328  | 0.03373  | 0.249 | 0.231 |          |       |  |                |         |
| cg13561855 | 14 | 52,735,840  | 5.5E-06  | 0.249 | 0.271 |          |       |  | <i>PTGDR</i>   | Body    |
| cg09615353 | 4  | 187,026,710 | 0.029015 | 0.249 | 0.192 |          |       |  |                |         |
| cg24590788 | 13 | 95,655,324  | 0.028331 | 0.249 | 0.132 |          |       |  |                |         |
| cg01093878 | 2  | 131,512,663 | 0.005128 | 0.249 | 0.281 |          |       |  | <i>FAM123C</i> | TSS1500 |
| cg07068674 | 14 | 37,123,778  | 1.08E-05 | 0.249 | 0.253 |          |       |  |                |         |
| cg22736718 | 5  | 691,229     | 0.000614 | 0.249 | 0.278 |          |       |  | <i>TPPP</i>    | 5'UTR   |
| cg13066963 | 1  | 6,485,317   | 2.89E-05 | 0.249 | 0.256 | 2.58E-18 | 0.168 |  | <i>ESPN</i>    | Body    |
| cg05372242 | 14 | 36,983,542  | 0.014736 | 0.249 | 0.307 |          |       |  | <i>SFTA3</i>   | TSS1500 |
| cg11095319 | 11 | 19,263,864  | 0.004986 | 0.249 | 0.254 |          |       |  | <i>E2F8</i>    | TSS1500 |
| cg17743381 | 1  | 39,024,825  | 2.65E-18 | 0.249 | 0.235 |          |       |  |                |         |
| cg26541218 | 7  | 47,826,387  | 5.02E-06 | 0.249 | 0.229 |          |       |  | <i>PKD1L1</i>  | Body    |
| cg14471064 | 9  | 139,236,663 | 1.21E-15 | 0.249 | 0.247 |          |       |  | <i>GPSM1</i>   | Body    |
| cg17553353 | 3  | 111,718,565 | 6.31E-09 | 0.249 | 0.230 |          |       |  | <i>TAGLN3</i>  | Body    |
| cg24375399 | 17 | 40,825,798  | 3.38E-27 | 0.249 | 0.242 |          |       |  | <i>PLEKHH3</i> | Body    |
| cg00632374 | X  | 46,432,929  | 0.017241 | 0.249 | 0.159 |          |       |  | <i>CHST7</i>   | TSS1500 |

|            |    |             |          |       |       |          |       |  |  |           |         |
|------------|----|-------------|----------|-------|-------|----------|-------|--|--|-----------|---------|
| cg15246085 | 3  | 49,460,111  | 5.3E-14  | 0.249 | 0.265 |          |       |  |  | AMT       | TSS200  |
| cg27041049 | 14 | 31,345,003  | 1.17E-14 | 0.249 | 0.229 |          |       |  |  | COCH      | Body    |
| cg14420519 | 9  | 139,515,751 | 1.46E-05 | 0.249 | 0.215 |          |       |  |  |           |         |
| cg16547027 | 18 | 24,127,588  | 3.56E-09 | 0.249 | 0.206 |          |       |  |  | KCTD1     | 5'UTR   |
| cg19130973 | 3  | 12,979,917  | 1.03E-14 | 0.249 | 0.242 |          |       |  |  | IQSEC1    | Body    |
| cg06578342 | 16 | 4,349,215   | 0.006616 | 0.249 | 0.271 |          |       |  |  |           |         |
| cg16602747 | 10 | 119,313,075 | 8.46E-05 | 0.249 | 0.216 |          |       |  |  |           |         |
| cg17068623 | 8  | 144,853,065 | 4.53E-05 | 0.249 | 0.225 |          |       |  |  |           |         |
| cg21234471 | 9  | 92,023,797  | 5.82E-11 | 0.249 | 0.233 |          |       |  |  | SEMA4D    | 5'UTR   |
| cg27240158 | 11 | 12,698,019  | 7.05E-09 | 0.249 | 0.257 |          |       |  |  | TEAD1     | 5'UTR   |
| cg13530938 | 2  | 239,140,190 | 0.000129 | 0.249 | 0.232 |          |       |  |  | LOC151174 | Body    |
| cg06653026 | 7  | 84,892,267  | 9.1E-11  | 0.249 | 0.243 |          |       |  |  |           |         |
| cg23177095 | 17 | 30,873,196  | 2.73E-07 | 0.249 | 0.256 |          |       |  |  | MYO1D     | Body    |
| cg06014588 | 15 | 88,801,339  | 1.22E-05 | 0.249 | 0.246 |          |       |  |  |           |         |
| cg08390209 | 9  | 22,005,563  | 4.06E-12 | 0.249 | 0.209 | 3.77E-23 | 0.170 |  |  | CDKN2BAS  | Body    |
| cg08745965 | 5  | 135,416,529 | 6.96E-05 | 0.249 | 0.222 |          |       |  |  | MIR886    | TSS1500 |
| cg10305789 | 20 | 37,434,167  | 0.000699 | 0.249 | 0.166 |          |       |  |  | PPP1R16B  | TSS200  |
| cg12746557 | 21 | 39,644,332  | 1.02E-10 | 0.249 | 0.227 |          |       |  |  | KCNJ15    | 5'UTR   |
| cg11055991 | 7  | 158,280,410 | 9.71E-05 | 0.249 | 0.243 |          |       |  |  | PTPRN2    | Body    |
| cg05828005 | 6  | 28,504,908  | 1.3E-07  | 0.249 | 0.245 |          |       |  |  |           |         |
| cg18512948 | 14 | 24,641,706  | 1.49E-12 | 0.249 | 0.229 |          |       |  |  | REC8      | 1stExon |
| cg01804679 | 1  | 32,707,303  | 0.000493 | 0.249 | 0.170 |          |       |  |  | MTMR9L    | Body    |
| cg20935165 | 2  | 172,972,840 | 6.63E-05 | 0.249 | 0.238 |          |       |  |  |           |         |
| cg12786198 | 14 | 55,741,714  | 4.96E-10 | 0.249 | 0.266 |          |       |  |  | FBXO34    | 5'UTR   |
| cg27426707 | 17 | 48,639,585  | 5.13E-05 | 0.249 | 0.263 | 2.62E-34 | 0.209 |  |  | CACNA1G   | Body    |
| cg05689208 | 8  | 49,496,391  | 3.48E-19 | 0.249 | 0.272 |          |       |  |  |           |         |
| cg12302402 | 11 | 18,230,629  | 0.000478 | 0.249 | 0.290 |          |       |  |  | LOC494141 | TSS200  |
| cg09279544 | 19 | 8,674,388   | 0.001342 | 0.249 | 0.302 |          |       |  |  | ADAMTS10  | 5'UTR   |
| cg11170179 | 19 | 51,522,767  | 3.44E-14 | 0.249 | 0.220 | 8.23E-22 | 0.150 |  |  | KLK10     | 5'UTR   |
| cg07937427 | 15 | 59,592,763  | 0.031456 | 0.249 | 0.225 |          |       |  |  | MYO1E     | Body    |
| cg02782426 | 3  | 40,428,986  | 0.02341  | 0.249 | 0.189 |          |       |  |  | ENTPD3    | 5'UTR   |
| cg14904923 | 8  | 122,651,570 | 0.001247 | 0.249 | 0.237 |          |       |  |  | HAS2      | 5'UTR   |
| cg16979070 | 6  | 150,463,417 | 0.000129 | 0.249 | 0.157 |          |       |  |  | PPP1R14C  | TSS1500 |
| cg27621745 | 8  | 82,671,510  | 0.00012  | 0.249 | 0.237 |          |       |  |  | CHMP4C    | 3'UTR   |

|            |    |             |          |       |       |          |       |  |                |         |
|------------|----|-------------|----------|-------|-------|----------|-------|--|----------------|---------|
| cg17542408 | 11 | 78,673,100  | 0.006543 | 0.249 | 0.199 |          |       |  | <i>ODZ4</i>    | Body    |
| cg17840719 | 5  | 178,368,253 | 0.033747 | 0.249 | 0.187 |          |       |  | <i>ZNF454</i>  | 1stExon |
| cg18093572 | 5  | 122,598,329 | 1.7E-12  | 0.249 | 0.234 |          |       |  |                |         |
| cg24835051 | 1  | 15,480,853  | 1.01E-06 | 0.249 | 0.229 |          |       |  | <i>TMEM51</i>  | 5'UTR   |
| cg15154229 | 7  | 130,020,011 | 4.32E-13 | 0.249 | 0.242 | 2.04E-22 | 0.180 |  | <i>CPA1</i>    | TSS1500 |
| cg21650866 | 8  | 142,297,256 | 6.02E-05 | 0.249 | 0.278 |          |       |  |                |         |
| cg07196992 | 4  | 78,098,654  | 4.24E-14 | 0.249 | 0.251 |          |       |  |                |         |
| cg10395252 | 14 | 76,236,901  | 8.7E-26  | 0.249 | 0.250 |          |       |  | <i>TLL5</i>    | Body    |
| cg17429000 | 5  | 76,936,636  | 0.007715 | 0.249 | 0.303 |          |       |  |                |         |
| cg24127861 | 14 | 24,640,947  | 1.44E-07 | 0.249 | 0.260 |          |       |  | <i>REC8</i>    | TSS1500 |
| cg14665413 | 4  | 38,859,728  | 0.000311 | 0.249 | 0.308 |          |       |  | <i>TLR6</i>    | TSS1500 |
| cg24745495 | 19 | 15,344,239  | 1.44E-08 | 0.249 | 0.235 |          |       |  | <i>EPHX3</i>   | TSS1500 |
| cg09530810 | 17 | 46,831,490  | 8.51E-07 | 0.249 | 0.240 |          |       |  |                |         |
| cg09560979 | 8  | 38,615,235  | 0.000423 | 0.249 | 0.156 |          |       |  | <i>TACC1</i>   | 5'UTR   |
| cg02358362 | 5  | 172,096,266 | 1.18E-15 | 0.249 | 0.225 |          |       |  | <i>NEURL1B</i> | Body    |
| cg02609692 | 9  | 129,389,125 | 1.28E-06 | 0.249 | 0.215 |          |       |  | <i>LMX1B</i>   | Body    |
| cg21046148 | 5  | 72,731,905  | 0.00532  | 0.249 | 0.227 |          |       |  |                |         |
| cg24851651 | 11 | 66,362,959  | 9.67E-09 | 0.249 | 0.221 |          |       |  | <i>CCS</i>     | Body    |
| cg01174140 | 5  | 180,018,735 | 4.98E-51 | 0.249 | 0.251 |          |       |  | <i>SCGB3A1</i> | TSS1500 |
| cg07384708 | 19 | 372,718     | 8.13E-12 | 0.249 | 0.226 |          |       |  | <i>THEG</i>    | Body    |
| cg12505170 | 5  | 72,595,685  | 0.006927 | 0.249 | 0.239 |          |       |  |                |         |
| cg17669581 | 4  | 54,968,251  | 0.000349 | 0.249 | 0.259 |          |       |  |                |         |
| cg07120346 | 6  | 58,141,890  | 0.007514 | 0.249 | 0.187 |          |       |  |                |         |
| cg16420756 | 6  | 5,026,219   | 0.02045  | 0.249 | 0.293 |          |       |  |                |         |
| cg23136799 | 6  | 167,763,819 | 0.023411 | 0.249 | 0.156 |          |       |  |                |         |
| cg12544951 | 20 | 21,695,343  | 0.04136  | 0.249 | 0.339 |          |       |  | <i>PAX1</i>    | Body    |
| cg06581718 | 19 | 7,541,760   | 6.78E-20 | 0.248 | 0.241 |          |       |  | <i>PEX11G</i>  | 3'UTR   |
| cg10000952 | 11 | 116,451,628 | 0.005669 | 0.248 | 0.190 |          |       |  |                |         |
| cg14508572 | 11 | 119,778,410 | 0.000148 | 0.248 | 0.202 |          |       |  |                |         |
| cg05481257 | 2  | 20,870,211  | 1.08E-06 | 0.248 | 0.218 |          |       |  | <i>GDF7</i>    | Body    |
| cg02154252 | 1  | 79,472,532  | 9.95E-11 | 0.248 | 0.226 |          |       |  | <i>ELTD1</i>   | TSS200  |
| cg11044575 | 6  | 105,401,636 | 0.040822 | 0.248 | 0.266 |          |       |  |                |         |
| cg21593409 | 16 | 88,706,389  | 0.002156 | 0.248 | 0.191 |          |       |  | <i>IL17C</i>   | Body    |
| cg20548888 | 14 | 36,974,929  | 0.003544 | 0.248 | 0.303 |          |       |  | <i>SFTA3</i>   | Body    |



|            |    |             |          |       |       |            |       |  |                  |         |
|------------|----|-------------|----------|-------|-------|------------|-------|--|------------------|---------|
| cg00830419 | 2  | 20,371,971  | 2.41E-16 | 0.248 | 0.227 |            |       |  |                  |         |
| cg06609094 | 4  | 175,132,842 | 0.00846  | 0.248 | 0.252 |            |       |  |                  |         |
| cg27635267 | 11 | 35,547,519  | 2.64E-05 | 0.248 | 0.201 |            |       |  | <i>PAMR1</i>     | TSS1500 |
| cg05513806 | 3  | 181,438,216 | 4.91E-06 | 0.248 | 0.248 |            |       |  | <i>SOX2OT</i>    | Body    |
| cg12687617 | 15 | 89,948,930  | 1.04E-07 | 0.248 | 0.257 |            |       |  |                  |         |
| cg16107628 | 1  | 159,894,061 | 3.53E-05 | 0.248 | 0.231 |            |       |  | <i>TAGLN2</i>    | 5'UTR   |
| cg26296337 | 17 | 72,931,792  | 2.83E-07 | 0.248 | 0.198 |            |       |  | <i>OTOP3</i>     | TSS200  |
| cg08053103 | 19 | 5,799,467   | 1.03E-05 | 0.248 | 0.289 |            |       |  |                  |         |
| cg14793406 | 12 | 115,135,906 | 1.58E-06 | 0.248 | 0.225 |            |       |  |                  |         |
| cg01148127 | 17 | 1,478,604   | 5.28E-11 | 0.248 | 0.236 |            |       |  | <i>SLC43A2</i>   | 3'UTR   |
| cg13762244 | 11 | 64,951,960  | 2.07E-08 | 0.248 | 0.288 |            |       |  | <i>CAPN1</i>     | Body    |
| cg22784386 | 6  | 100,903,817 | 0.000455 | 0.248 | 0.257 |            |       |  | <i>SIM1</i>      | Body    |
| cg26365668 | 4  | 84,375,973  | 7.78E-07 | 0.248 | 0.194 | 0.00058912 | 0.065 |  | <i>MRPS18C</i>   | TSS1500 |
| cg14504269 | 3  | 138,658,941 | 0.002359 | 0.248 | 0.287 |            |       |  |                  |         |
| cg00494665 | 12 | 65,218,728  | 0.000216 | 0.248 | 0.128 |            |       |  |                  |         |
| cg02048377 | 17 | 37,219,764  | 0.000462 | 0.248 | 0.191 |            |       |  | <i>PLXDC1</i>    | 3'UTR   |
| cg07147475 | 4  | 141,419,555 | 3.99E-07 | 0.248 | 0.200 |            |       |  |                  |         |
| cg10778736 | 15 | 45,406,362  | 2.89E-05 | 0.248 | 0.247 |            |       |  | <i>DUOX2</i>     | TSS200  |
| cg12251804 | 10 | 135,171,083 | 2.75E-05 | 0.248 | 0.251 | 1.88E-23   | 0.247 |  | <i>C10orf125</i> | Body    |
| cg16068263 | 13 | 36,729,231  | 2.78E-05 | 0.248 | 0.232 |            |       |  |                  |         |
| cg02925229 | 3  | 139,258,948 | 1.32E-08 | 0.248 | 0.254 |            |       |  | <i>RBP1</i>      | TSS1500 |
| cg12213062 | 2  | 220,299,653 | 8.48E-07 | 0.248 | 0.246 |            |       |  | <i>SPEG</i>      | TSS200  |
| cg15583014 | 1  | 65,468,659  | 0.004262 | 0.248 | 0.150 |            |       |  |                  |         |
| cg02828785 | 12 | 12,846,546  | 9.13E-16 | 0.248 | 0.255 |            |       |  | <i>GPR19</i>     | 5'UTR   |
| cg02853553 | 7  | 44,258,054  | 2.89E-20 | 0.248 | 0.245 |            |       |  | <i>CAMK2B</i>    | 3'UTR   |
| cg13897833 | 13 | 74,562,744  | 5E-18    | 0.248 | 0.210 |            |       |  | <i>KLF12</i>     | Body    |
| cg21949305 | 22 | 24,828,655  | 1.53E-12 | 0.248 | 0.240 | 2.56E-27   | 0.252 |  | <i>C22orf45</i>  | Body    |
| cg23267558 | 13 | 70,682,604  | 0.000635 | 0.248 | 0.259 |            |       |  | <i>KLHL1</i>     | 1stExon |
| cg17760391 | 5  | 66,124,501  | 0.001006 | 0.248 | 0.111 |            |       |  | <i>MAST4</i>     | TSS200  |
| cg10785622 | 4  | 85,403,409  | 0.006396 | 0.248 | 0.255 |            |       |  |                  |         |
| cg14664759 | 1  | 196,577,723 | 0.006141 | 0.248 | 0.334 |            |       |  | <i>KCNT2</i>     | TSS1500 |
| cg24940370 | 5  | 1,835,328   | 1.78E-06 | 0.248 | 0.240 |            |       |  |                  |         |
| cg02775927 | 10 | 79,470,820  | 2.04E-06 | 0.248 | 0.170 |            |       |  |                  |         |
| cg02926266 | 2  | 205,847,300 | 6.03E-11 | 0.248 | 0.233 |            |       |  | <i>PARD3B</i>    | Body    |

|            |    |             |          |       |       |          |       |  |                |         |
|------------|----|-------------|----------|-------|-------|----------|-------|--|----------------|---------|
| cg12796306 | 8  | 67,406,954  | 0.001507 | 0.248 | 0.253 |          |       |  | <i>C8orf46</i> | Body    |
| cg05815196 | 22 | 31,536,540  | 3.43E-05 | 0.248 | 0.250 |          |       |  | <i>PLA2G3</i>  | TSS200  |
| cg02167021 | 3  | 121,379,791 | 8.48E-07 | 0.248 | 0.220 |          |       |  | <i>HCLS1</i>   | TSS200  |
| cg08690412 | 3  | 9,240,454   | 0.000551 | 0.248 | 0.187 |          |       |  | <i>SRGAP3</i>  | Body    |
| cg12646804 | 5  | 2,008,188   | 0.020395 | 0.248 | 0.125 |          |       |  |                |         |
| cg21154793 | 19 | 54,495,222  | 0.030195 | 0.248 | 0.239 |          |       |  | <i>CACNG6</i>  | TSS1500 |
| cg24641302 | 1  | 165,087,025 | 0.00068  | 0.248 | 0.233 |          |       |  |                |         |
| cg11885098 | 19 | 1,285,397   | 1.86E-09 | 0.248 | 0.235 | 2.13E-19 | 0.088 |  | <i>EFNA2</i>   | TSS1500 |
| cg15382538 | 5  | 72,678,193  | 2.58E-05 | 0.248 | 0.306 |          |       |  |                |         |
| cg23317501 | 5  | 35,991,215  | 7.11E-05 | 0.248 | 0.233 | 6.37E-12 | 0.155 |  | <i>UGT3A1</i>  | Body    |
| cg23414595 | 22 | 30,129,607  | 7.64E-12 | 0.248 | 0.219 |          |       |  | <i>ZMAT5</i>   | Body    |
| cg24689895 | 17 | 27,346,926  | 0.044769 | 0.248 | 0.045 |          |       |  |                |         |
| cg25712005 | 7  | 73,443,113  | 0.002156 | 0.248 | 0.359 |          |       |  | <i>ELN</i>     | Body    |
| cg02705958 | 6  | 6,901,065   | 1.47E-10 | 0.248 | 0.215 |          |       |  |                |         |
| cg08548089 | 1  | 156,408,887 | 2.82E-08 | 0.248 | 0.248 |          |       |  |                |         |
| cg17869514 | 9  | 1,042,770   | 0.001052 | 0.248 | 0.291 |          |       |  |                |         |
| cg20454002 | 1  | 221,054,365 | 8.91E-10 | 0.248 | 0.250 |          |       |  | <i>HLX</i>     | Body    |
| cg08015382 | 6  | 12,365,899  | 1.39E-06 | 0.248 | 0.236 |          |       |  |                |         |
| cg10237765 | 17 | 9,863,081   | 3.4E-05  | 0.248 | 0.269 |          |       |  | <i>GAS7</i>    | Body    |
| cg26953453 | 12 | 54,346,784  | 0.001895 | 0.248 | 0.279 |          |       |  |                |         |
| cg01351300 | 4  | 114,873,079 | 1.69E-18 | 0.248 | 0.216 |          |       |  | <i>ARSJ</i>    | Body    |
| cg10799055 | 6  | 27,725,188  | 0.03395  | 0.248 | 0.311 |          |       |  |                |         |
| cg09714458 | 13 | 113,807,560 | 0.028235 | 0.248 | 0.312 |          |       |  |                |         |
| cg09918657 | 16 | 14,397,207  | 0.004162 | 0.248 | 0.295 |          |       |  | <i>MIR193B</i> | TSS1500 |
| cg18181496 | 7  | 107,642,539 | 8.33E-06 | 0.248 | 0.236 |          |       |  | <i>LAMB1</i>   | Body    |
| cg08957564 | 16 | 12,071,814  | 3.13E-19 | 0.248 | 0.251 |          |       |  | <i>RUNDC2A</i> | Body    |
| cg16786102 | 4  | 41,867,462  | 1.83E-08 | 0.248 | 0.233 |          |       |  |                |         |
| cg09317884 | 1  | 165,204,512 | 4.81E-05 | 0.248 | 0.246 |          |       |  | <i>LMX1A</i>   | Body    |
| cg14382719 | 9  | 124,291,856 | 1.5E-10  | 0.248 | 0.227 |          |       |  |                |         |
| cg19631648 | 19 | 33,764,284  | 2.72E-14 | 0.248 | 0.241 |          |       |  |                |         |
| cg27559870 | 1  | 31,380,976  | 0.012173 | 0.248 | 0.193 |          |       |  | <i>SDC3</i>    | Body    |
| cg19597382 | 4  | 147,559,423 | 0.023863 | 0.248 | 0.181 |          |       |  | <i>POU4F2</i>  | TSS1500 |
| cg04555966 | 7  | 44,185,986  | 0.0002   | 0.248 | 0.275 |          |       |  | <i>GCK</i>     | Body    |
| cg22621272 | 12 | 54,409,336  | 0.039855 | 0.248 | 0.235 |          |       |  | <i>HOXC4</i>   | TSS1500 |

|            |    |             |          |       |       |          |       |     |                     |         |
|------------|----|-------------|----------|-------|-------|----------|-------|-----|---------------------|---------|
| cg24140801 | 8  | 30,588,816  | 1.21E-10 | 0.248 | 0.207 |          |       |     |                     |         |
| cg08843283 | 1  | 32,826,969  | 3.88E-22 | 0.248 | 0.233 |          |       |     | <i>LOC100128071</i> | 3'UTR   |
| cg04418091 | 12 | 54,071,168  | 0.011378 | 0.248 | 0.213 |          |       |     | <i>ATP5G2</i>       | TSS1500 |
| cg16905100 | 3  | 72,149,974  | 0.032565 | 0.248 | 0.147 |          |       |     |                     |         |
| cg04932340 | 14 | 95,239,381  | 0.009591 | 0.248 | 0.315 |          |       |     |                     |         |
| cg03667086 | 2  | 130,763,427 | 1.6E-09  | 0.248 | 0.243 |          |       |     |                     |         |
| cg06743610 | 19 | 35,630,305  | 5.32E-08 | 0.248 | 0.248 |          |       |     | <i>FXVD1</i>        | 5'UTR   |
| cg18284089 | 4  | 153,601,384 | 0.032034 | 0.248 | 0.236 |          |       |     | <i>TMEM154</i>      | TSS200  |
| cg12479878 | 1  | 221,054,825 | 4.16E-10 | 0.248 | 0.232 |          |       |     | <i>HLX</i>          | Body    |
| cg14252661 | 1  | 162,792,613 | 0.002409 | 0.248 | 0.292 |          |       | Yes |                     |         |
| cg05222982 | 13 | 28,545,214  | 1.56E-07 | 0.248 | 0.233 |          |       |     |                     |         |
| cg22512438 | 3  | 129,693,489 | 0.016312 | 0.248 | 0.320 |          |       |     | <i>TRH</i>          | 5'UTR   |
| cg08567279 | 13 | 53,313,529  | 0.030945 | 0.248 | 0.227 |          |       |     | <i>LECT1</i>        | Body    |
| cg05314679 | 8  | 101,821,998 | 4.69E-05 | 0.248 | 0.219 |          |       | Yes |                     |         |
| cg08994384 | 3  | 62,363,642  | 0.008403 | 0.248 | 0.267 |          |       |     |                     |         |
| cg19860353 | 3  | 194,756,349 | 8.18E-15 | 0.248 | 0.208 |          |       |     |                     |         |
| cg26472636 | 5  | 1,594,282   | 0.042894 | 0.248 | 0.024 |          |       |     | <i>SDHAP3</i>       | Body    |
| cg01886663 | 17 | 78,846,179  | 8.45E-26 | 0.248 | 0.245 |          |       |     | <i>RPTOR</i>        | Body    |
| cg12890346 | 3  | 14,567,529  | 2.82E-09 | 0.248 | 0.229 |          |       |     | <i>GRIP2</i>        | Body    |
| cg24775496 | 14 | 85,998,576  | 0.000209 | 0.248 | 0.193 |          |       |     | <i>FLRT2</i>        | 5'UTR   |
| cg07539798 | 5  | 140,811,312 | 1.55E-07 | 0.248 | 0.234 |          |       |     | <i>PCDHGA4</i>      | Body    |
| cg22531904 | 7  | 99,595,276  | 0.003343 | 0.248 | 0.230 |          |       |     |                     |         |
| cg21684021 | 1  | 109,800,400 | 1.71E-07 | 0.248 | 0.264 |          |       |     | <i>CELSR2</i>       | Body    |
| cg27016307 | 19 | 49,658,913  | 3.03E-09 | 0.248 | 0.232 | 3.67E-15 | 0.096 |     | <i>HRC</i>          | TSS1500 |
| cg00581422 | 3  | 127,794,831 | 9.26E-08 | 0.248 | 0.249 |          |       |     |                     |         |
| cg17883914 | 8  | 144,344,745 | 1.12E-14 | 0.248 | 0.239 |          |       |     | <i>ZFP41</i>        | 3'UTR   |
| cg23270523 | 18 | 4,450,489   | 0.025594 | 0.248 | 0.223 |          |       |     |                     |         |
| cg00377320 | 17 | 47,988,100  | 2.08E-05 | 0.248 | 0.283 |          |       |     |                     |         |
| cg04606020 | 12 | 56,139,467  | 0.002079 | 0.248 | 0.212 |          |       |     | <i>GDF11</i>        | Body    |
| cg19462635 | 11 | 121,237,843 | 1.45E-09 | 0.248 | 0.244 |          |       |     |                     |         |
| cg27093944 | 2  | 242,908,218 | 3.12E-06 | 0.248 | 0.232 |          |       |     |                     |         |
| cg01455568 | 7  | 155,261,034 | 9.33E-06 | 0.248 | 0.190 |          |       |     |                     |         |
| cg07235805 | 18 | 78,004,237  | 9.96E-07 | 0.248 | 0.179 |          |       |     | <i>PARD6G</i>       | Body    |
| cg05151709 | 1  | 846,155     | 1.36E-10 | 0.248 | 0.262 |          |       |     |                     |         |

|            |    |             |          |       |       |          |       |  |                     |         |
|------------|----|-------------|----------|-------|-------|----------|-------|--|---------------------|---------|
| cg02002258 | 2  | 26,700,976  | 2.67E-08 | 0.248 | 0.246 |          |       |  | <i>OTOF</i>         | TSS200  |
| cg13455434 | 8  | 30,243,930  | 1.39E-09 | 0.248 | 0.221 |          |       |  | <i>RBPMS</i>        | Body    |
| cg13460168 | 1  | 16,501,540  | 1.25E-27 | 0.248 | 0.249 |          |       |  |                     |         |
| cg16336556 | 2  | 33,295,138  | 6.25E-05 | 0.248 | 0.285 |          |       |  | <i>LTBP1</i>        | Body    |
| cg17383842 | 3  | 50,553,718  | 4.56E-08 | 0.248 | 0.235 |          |       |  |                     |         |
| cg11684647 | 12 | 40,618,356  | 0.004291 | 0.248 | 0.300 |          |       |  | <i>LRRK2</i>        | TSS1500 |
| cg07455789 | 2  | 232,419,317 | 9.69E-10 | 0.248 | 0.237 |          |       |  |                     |         |
| cg24376793 | 1  | 202,545,589 | 3.91E-07 | 0.248 | 0.257 |          |       |  | <i>PPP1R12B</i>     | 3'UTR   |
| cg02925601 | 6  | 27,648,605  | 0.001972 | 0.248 | 0.321 |          |       |  |                     |         |
| cg14497054 | 12 | 34,261,116  | 8.47E-24 | 0.248 | 0.235 |          |       |  |                     |         |
| cg03975690 | 7  | 87,848,292  | 0.049235 | 0.248 | 0.198 |          |       |  | <i>SRI</i>          | Body    |
| cg07951347 | 6  | 27,463,250  | 0.010676 | 0.248 | 0.309 |          |       |  |                     |         |
| cg03703839 | 16 | 87,990,084  | 0.000133 | 0.248 | 0.253 |          |       |  | <i>BANP</i>         | 5'UTR   |
| cg08291024 | 1  | 165,324,411 | 0.007466 | 0.248 | 0.332 |          |       |  | <i>LMX1A</i>        | Body    |
| cg16046444 | 1  | 200,004,265 | 0.001108 | 0.248 | 0.295 |          |       |  | <i>NR5A2</i>        | Body    |
| cg15572907 | 19 | 40,995,921  | 0.001869 | 0.248 | 0.245 |          |       |  | <i>SPTBN4</i>       | Body    |
| cg17003260 | 17 | 8,907,561   | 3.44E-05 | 0.248 | 0.228 |          |       |  |                     |         |
| cg20489847 | 8  | 144,095,483 | 1.58E-08 | 0.248 | 0.249 |          |       |  | <i>LOC100133669</i> | Body    |
| cg01451162 | 1  | 58,714,452  | 0.007854 | 0.248 | 0.214 |          |       |  | <i>DAB1</i>         | 5'UTR   |
| cg20743744 | 4  | 1,243,849   | 3.97E-06 | 0.248 | 0.217 | 3.27E-18 | 0.221 |  | <i>C4orf42</i>      | TSS1500 |
| cg03053826 | 15 | 96,868,935  | 0.001341 | 0.248 | 0.217 |          |       |  | <i>NR2F2</i>        | TSS1500 |
| cg07042914 | 11 | 27,015,656  | 0.017714 | 0.248 | 0.295 |          |       |  | <i>FIBIN</i>        | 5'UTR   |
| cg09368936 | 2  | 43,019,819  | 0.008166 | 0.248 | 0.157 |          |       |  | <i>HAAO</i>         | TSS200  |
| cg23737737 | 12 | 6,665,370   | 5.99E-05 | 0.248 | 0.251 |          |       |  | <i>IFFO1</i>        | TSS200  |
| cg03519157 | 11 | 46,367,033  | 1.48E-10 | 0.248 | 0.249 |          |       |  | <i>DGKZ</i>         | 5'UTR   |
| cg02371631 | 2  | 202,748,718 | 8.15E-11 | 0.248 | 0.234 |          |       |  | <i>CDK15</i>        | Body    |
| cg04460847 | 7  | 127,841,335 | 1.11E-06 | 0.248 | 0.195 |          |       |  |                     |         |
| cg08951638 | 5  | 141,706,213 | 8.42E-11 | 0.248 | 0.234 |          |       |  |                     |         |
| cg27516568 | 4  | 122,686,667 | 0.001099 | 0.248 | 0.189 |          |       |  | <i>TMEM155</i>      | TSS1500 |
| cg01305981 | 5  | 135,266,673 | 8.96E-08 | 0.248 | 0.235 |          |       |  | <i>FBXL21</i>       | 5'UTR   |
| cg09605636 | 2  | 200,334,584 | 4.81E-07 | 0.248 | 0.228 |          |       |  | <i>FLJ32063</i>     | Body    |
| cg12967327 | 17 | 1,906,190   | 7.18E-06 | 0.248 | 0.210 |          |       |  | <i>RTN4RL1</i>      | Body    |
| cg08475953 | 5  | 178,004,091 | 0.002708 | 0.248 | 0.255 |          |       |  | <i>COL23A1</i>      | Body    |
| cg21115608 | 13 | 20,735,860  | 9.35E-08 | 0.248 | 0.244 |          |       |  | <i>GJA3</i>         | TSS1500 |

|            |    |             |          |       |       |          |       |  |                |         |
|------------|----|-------------|----------|-------|-------|----------|-------|--|----------------|---------|
| cg02671880 | 13 | 95,355,117  | 0.001385 | 0.248 | 0.262 |          |       |  |                |         |
| cg04288241 | 2  | 236,444,202 | 8.49E-05 | 0.248 | 0.226 |          |       |  | <i>AGAP1</i>   | Body    |
| cg11328436 | 12 | 54,360,511  | 3.54E-11 | 0.248 | 0.224 |          |       |  | <i>HOTAIR</i>  | Body    |
| cg16987754 | 7  | 155,242,911 | 0.003536 | 0.248 | 0.200 |          |       |  |                |         |
| cg01213447 | 15 | 96,871,576  | 3.91E-06 | 0.247 | 0.253 |          |       |  | <i>NR2F2</i>   | Body    |
| cg10900455 | 20 | 42,545,099  | 4.6E-06  | 0.247 | 0.213 |          |       |  | <i>TOX2</i>    | 5'UTR   |
| cg10928294 | 17 | 41,739,326  | 0.000559 | 0.247 | 0.222 |          |       |  | <i>MEOX1</i>   | TSS1500 |
| cg01146232 | 16 | 51,185,147  | 0.006234 | 0.247 | 0.211 |          |       |  | <i>SALL1</i>   | TSS1500 |
| cg02269083 | 18 | 56,296,607  | 1.42E-07 | 0.247 | 0.264 |          |       |  | <i>ALPK2</i>   | TSS1500 |
| cg19149463 | 3  | 11,651,759  | 1.06E-13 | 0.247 | 0.203 |          |       |  | <i>VGLL4</i>   | Body    |
| cg21545390 | 7  | 96,627,190  | 0.035208 | 0.247 | 0.283 |          |       |  | <i>DLX6AS</i>  | Body    |
| cg05255351 | 5  | 1,503,979   | 5.12E-14 | 0.247 | 0.232 |          |       |  | <i>LPCAT1</i>  | Body    |
| cg18274480 | 5  | 145,713,863 | 1.67E-05 | 0.247 | 0.242 |          |       |  |                |         |
| cg12492345 | 16 | 54,971,007  | 0.013333 | 0.247 | 0.297 |          |       |  |                |         |
| cg04846243 | 17 | 47,074,883  | 0.005583 | 0.247 | 0.274 |          |       |  | <i>IGF2BP1</i> | 1stExon |
| cg07303450 | 16 | 30,023,400  | 8.33E-07 | 0.247 | 0.252 |          |       |  | <i>DOC2A</i>   | TSS1500 |
| cg08559364 | 3  | 11,634,536  | 2.27E-16 | 0.247 | 0.245 |          |       |  | <i>VGLL4</i>   | Body    |
| cg21815667 | 2  | 176,993,841 | 0.000408 | 0.247 | 0.247 | 3.48E-11 | 0.152 |  | <i>HOXD8</i>   | TSS1500 |
| cg23085662 | 18 | 59,000,860  | 4.92E-08 | 0.247 | 0.208 |          |       |  |                |         |
| cg01933836 | 11 | 122,854,796 | 4.65E-05 | 0.247 | 0.238 |          |       |  |                |         |
| cg15128801 | 1  | 68,202,053  | 0.0002   | 0.247 | 0.246 |          |       |  | <i>GNG12</i>   | 5'UTR   |
| cg16022049 | 12 | 13,359,372  | 2.12E-06 | 0.247 | 0.248 |          |       |  | <i>EMP1</i>    | 5'UTR   |
| cg20965469 | 2  | 100,266,111 | 6.31E-08 | 0.247 | 0.243 |          |       |  | <i>AFF3</i>    | Body    |
| cg08185345 | 1  | 155,055,102 | 0.000626 | 0.247 | 0.210 |          |       |  | <i>EFNA3</i>   | Body    |
| cg21165812 | 20 | 54,931,343  | 9.41E-08 | 0.247 | 0.245 |          |       |  |                |         |
| cg14263858 | 19 | 4,328,745   | 7.72E-05 | 0.247 | 0.260 |          |       |  | <i>STAP2</i>   | Body    |
| cg27290624 | 3  | 194,208,441 | 0.000277 | 0.247 | 0.240 |          |       |  |                |         |
| cg14398661 | 9  | 129,433,779 | 9.44E-07 | 0.247 | 0.247 |          |       |  | <i>LMX1B</i>   | Body    |
| cg14569644 | 12 | 54,408,091  | 3E-05    | 0.247 | 0.223 |          |       |  |                |         |
| cg23346408 | 10 | 81,001,957  | 0.001909 | 0.247 | 0.179 |          |       |  | <i>ZMIZ1</i>   | Body    |
| cg27069921 | 5  | 54,523,727  | 1.32E-06 | 0.247 | 0.238 |          |       |  |                |         |
| cg09234616 | 11 | 32,452,592  | 0.007517 | 0.247 | 0.257 |          |       |  | <i>WT1</i>     | Body    |
| cg25219188 | 4  | 165,898,926 | 0.000149 | 0.247 | 0.238 |          |       |  | <i>TRIM61</i>  | TSS200  |
| cg26922678 | 6  | 30,420,981  | 0.004587 | 0.247 | 0.239 |          |       |  |                |         |

|            |    |             |          |       |       |          |       |  |           |         |
|------------|----|-------------|----------|-------|-------|----------|-------|--|-----------|---------|
| cg00298065 | 19 | 58,715,577  | 1.82E-11 | 0.247 | 0.240 |          |       |  | ZNF274    | Body    |
| cg11226913 | 14 | 29,254,961  | 7.18E-07 | 0.247 | 0.240 |          |       |  | C14orf23  | Body    |
| cg19851909 | 11 | 94,134,827  | 0.000201 | 0.247 | 0.153 |          |       |  | GPR83     | TSS1500 |
| cg13896328 | 1  | 29,652,476  | 9.66E-18 | 0.247 | 0.241 |          |       |  | PTPRU     | 3'UTR   |
| cg01069311 | X  | 47,373,245  | 2.29E-16 | 0.247 | 0.218 |          |       |  |           |         |
| cg01113811 | 11 | 95,927,950  | 1.81E-06 | 0.247 | 0.273 |          |       |  | MAML2     | Body    |
| cg04037970 | 7  | 54,955,965  | 1.31E-29 | 0.247 | 0.220 |          |       |  |           |         |
| cg20030711 | 17 | 75,471,308  | 4.48E-16 | 0.247 | 0.234 |          |       |  | SEPT9     | Body    |
| cg19216792 | 7  | 26,897,202  | 1.22E-10 | 0.247 | 0.219 |          |       |  | SKAP2     | Body    |
| cg12423482 | X  | 21,676,871  | 0.004071 | 0.247 | 0.225 |          |       |  | KLHL34    | TSS1500 |
| cg12776287 | 18 | 24,125,939  | 0.000644 | 0.247 | 0.201 |          |       |  | KCTD1     | 5'UTR   |
| cg15460348 | 4  | 88,896,909  | 1.4E-05  | 0.247 | 0.229 |          |       |  | SPP1      | 1stExon |
| cg15281774 | 15 | 73,661,908  | 0.022766 | 0.247 | 0.289 |          |       |  | HCN4      | TSS1500 |
| cg18184411 | 1  | 53,309,261  | 0.000507 | 0.247 | 0.204 |          |       |  | ZYG11A    | Body    |
| cg05959459 | 1  | 147,752,860 | 0.00281  | 0.247 | 0.268 |          |       |  |           |         |
| cg05081751 | 20 | 62,108,923  | 4.86E-05 | 0.247 | 0.278 |          |       |  |           |         |
| cg07452306 | 2  | 73,299,297  | 1.27E-11 | 0.247 | 0.175 |          |       |  | SFXN5     | TSS1500 |
| cg14959729 | 6  | 166,580,693 | 1.81E-06 | 0.247 | 0.271 |          |       |  | T         | Body    |
| cg11996428 | 9  | 135,466,211 | 0.00067  | 0.247 | 0.220 |          |       |  |           |         |
| cg12074182 | 2  | 176,948,596 | 3.96E-06 | 0.247 | 0.207 |          |       |  | EVX2      | 5'UTR   |
| cg13998850 | 14 | 24,540,773  | 7.07E-10 | 0.247 | 0.292 |          |       |  | CPNE6     | 1stExon |
| cg05921207 | X  | 110,038,886 | 7.61E-05 | 0.247 | 0.167 | 4.56E-32 | 0.166 |  | CHRD1     | 5'UTR   |
| cg26279070 | 2  | 130,971,343 | 0.000896 | 0.247 | 0.203 |          |       |  |           |         |
| cg05068452 | 4  | 115,521,241 | 7.75E-08 | 0.247 | 0.256 |          |       |  | UGT8      | 5'UTR   |
| cg18448746 | 17 | 27,039,132  | 5.28E-07 | 0.247 | 0.246 |          |       |  | PROCA1    | TSS1500 |
| cg22740603 | 6  | 33,397,959  | 3E-18    | 0.247 | 0.239 |          |       |  | SYNGAP1   | Body    |
| cg12743638 | 22 | 20,192,485  | 1.2E-14  | 0.247 | 0.246 |          |       |  | LOC150197 | TSS1500 |
| cg24000859 | 7  | 71,023,890  | 0.002431 | 0.247 | 0.168 |          |       |  | WBSCR17   | Body    |
| cg00828762 | 8  | 42,234,732  | 2.16E-06 | 0.247 | 0.256 |          |       |  | DKK4      | TSS200  |
| cg00914222 | 1  | 29,585,898  | 0.000143 | 0.247 | 0.193 |          |       |  | PTPRU     | Body    |
| cg16473141 | 14 | 24,641,501  | 5.3E-12  | 0.247 | 0.237 |          |       |  | REC8      | 1stExon |
| cg19286687 | 2  | 220,282,243 | 2.97E-10 | 0.247 | 0.224 |          |       |  | DES       | TSS1500 |
| cg09822192 | 14 | 24,801,191  | 8.01E-21 | 0.247 | 0.223 |          |       |  | ADCY4     | Body    |
| cg14360917 | 17 | 45,992,122  | 7.32E-12 | 0.247 | 0.259 | 7.38E-37 | 0.193 |  | SP2       | Body    |

|            |    |             |          |       |       |  |  |     |                  |         |
|------------|----|-------------|----------|-------|-------|--|--|-----|------------------|---------|
| cg07737560 | 12 | 101,470,827 | 0.003645 | 0.247 | 0.236 |  |  |     | <i>ANO4</i>      | Body    |
| cg01620701 | 15 | 75,953,954  | 5.56E-11 | 0.247 | 0.220 |  |  |     |                  |         |
| cg07242540 | 1  | 12,600,348  | 2.57E-10 | 0.247 | 0.264 |  |  |     |                  |         |
| cg26987660 | 11 | 71,952,431  | 5.87E-09 | 0.247 | 0.217 |  |  |     | <i>PHOX2A</i>    | Body    |
| cg16861031 | 12 | 105,477,526 | 0.000278 | 0.247 | 0.212 |  |  |     | <i>ALDH1L2</i>   | Body    |
| cg19184885 | 17 | 45,699,322  | 2.28E-16 | 0.247 | 0.263 |  |  |     | <i>NPEPPS</i>    | 3'UTR   |
| cg16941302 | 18 | 55,108,947  | 0.008382 | 0.247 | 0.268 |  |  |     | <i>ONECUT2</i>   | Body    |
| cg11250081 | 21 | 46,126,104  | 4.02E-05 | 0.247 | 0.249 |  |  |     | <i>C21orf29</i>  | Body    |
| cg14383658 | 10 | 102,899,262 | 5.25E-06 | 0.247 | 0.225 |  |  |     |                  |         |
| cg25389328 | 17 | 38,222,062  | 1.82E-18 | 0.247 | 0.236 |  |  |     | <i>THRA</i>      | 5'UTR   |
| cg26568372 | 1  | 91,190,173  | 0.026194 | 0.247 | 0.338 |  |  |     |                  |         |
| cg06321596 | 16 | 17,562,960  | 2E-08    | 0.247 | 0.269 |  |  |     | <i>XYLT1</i>     | Body    |
| cg20010506 | 12 | 62,585,467  | 0.000141 | 0.247 | 0.207 |  |  |     | <i>FAM19A2</i>   | 5'UTR   |
| cg13403586 | 1  | 22,141,170  | 0.031314 | 0.247 | 0.330 |  |  |     | <i>LDLRAD2</i>   | Body    |
| cg01291336 | 7  | 150,949,495 | 0.004631 | 0.247 | 0.152 |  |  |     | <i>SMARCD3</i>   | Body    |
| cg12684999 | 2  | 161,099,777 | 5.27E-08 | 0.247 | 0.242 |  |  |     |                  |         |
| cg19589939 | 12 | 103,355,326 | 0.000358 | 0.247 | 0.250 |  |  |     |                  |         |
| cg24411961 | 1  | 34,642,396  | 0.007798 | 0.247 | 0.207 |  |  |     | <i>C1orf94</i>   | 5'UTR   |
| cg20803796 | 8  | 145,103,842 | 0.003091 | 0.247 | 0.225 |  |  |     |                  |         |
| cg23837265 | 10 | 88,730,407  | 3.13E-05 | 0.247 | 0.192 |  |  |     | <i>C10orf116</i> | 3'UTR   |
| cg24249778 | 4  | 55,095,226  | 0.014003 | 0.247 | 0.342 |  |  |     | <i>PDGFRA</i>    | TSS200  |
| cg14183329 | 7  | 131,242,962 | 0.012307 | 0.247 | 0.175 |  |  |     |                  |         |
| cg12093241 | 6  | 157,465,138 | 8.39E-17 | 0.247 | 0.245 |  |  |     | <i>ARID1B</i>    | Body    |
| cg12434944 | 7  | 48,031,559  | 0.003907 | 0.247 | 0.216 |  |  |     | <i>SUNC1</i>     | Body    |
| cg19540425 | 12 | 32,655,836  | 3.65E-18 | 0.247 | 0.246 |  |  |     | <i>FGD4</i>      | 5'UTR   |
| cg08194989 | 8  | 41,655,154  | 8.57E-15 | 0.247 | 0.229 |  |  |     | <i>ANK1</i>      | TSS200  |
| cg11131384 | 7  | 155,325,597 | 0.000786 | 0.247 | 0.215 |  |  |     | <i>CNPY1</i>     | 5'UTR   |
| cg23695133 | 20 | 21,087,075  | 0.017762 | 0.247 | 0.273 |  |  |     |                  |         |
| cg02249713 | 6  | 6,547,074   | 0.045279 | 0.247 | 0.096 |  |  | Yes | <i>LOC285780</i> | Body    |
| cg18378811 | 4  | 114,900,050 | 0.01508  | 0.247 | 0.232 |  |  |     | <i>ARSJ</i>      | 1stExon |
| cg09407650 | 16 | 85,320,156  | 4.43E-10 | 0.247 | 0.235 |  |  |     |                  |         |
| cg12237784 | 7  | 44,187,017  | 9.81E-27 | 0.247 | 0.226 |  |  |     | <i>GCK</i>       | Body    |
| cg16727774 | 16 | 87,958,281  | 4.79E-05 | 0.247 | 0.197 |  |  |     | <i>CA5A</i>      | Body    |
| cg25774643 | 11 | 627,175     | 7.77E-05 | 0.247 | 0.238 |  |  |     | <i>SCT</i>       | TSS200  |

|            |    |             |          |       |       |          |       |     |                     |         |
|------------|----|-------------|----------|-------|-------|----------|-------|-----|---------------------|---------|
| cg14031054 | 1  | 164,681,652 | 1.46E-08 | 0.247 | 0.236 |          |       |     | <i>PBX1</i>         | Body    |
| cg16310491 | 5  | 87,973,597  | 0.000277 | 0.247 | 0.197 |          |       |     | <i>LOC645323</i>    | Body    |
| cg03070194 | 1  | 110,210,684 | 6.73E-07 | 0.247 | 0.247 | 1.76E-19 | 0.235 |     | <i>GSTM2</i>        | 5'UTR   |
| cg00722631 | 5  | 9,548,098   | 0.000952 | 0.247 | 0.273 |          |       | Yes | <i>SNORD123</i>     | TSS1500 |
| cg02996801 | 4  | 113,441,944 | 0.017295 | 0.247 | 0.323 |          |       |     |                     |         |
| cg05226932 | 22 | 37,720,696  | 8.21E-07 | 0.247 | 0.196 |          |       |     |                     |         |
| cg06836849 | 12 | 100,751,051 | 3.67E-05 | 0.247 | 0.214 | 2.28E-24 | 0.188 |     | <i>SLC17A8</i>      | 1stExon |
| cg14758204 | 20 | 9,487,871   | 1.29E-07 | 0.247 | 0.216 |          |       |     |                     |         |
| cg16297271 | 14 | 94,984,308  | 2.86E-06 | 0.247 | 0.243 |          |       |     | <i>SERPINA12</i>    | TSS200  |
| cg22627981 | 1  | 165,204,410 | 1.37E-05 | 0.247 | 0.262 |          |       |     | <i>LMX1A</i>        | Body    |
| cg00683332 | 16 | 51,188,697  | 0.003745 | 0.247 | 0.198 |          |       |     |                     |         |
| cg00868875 | 18 | 24,127,237  | 2.22E-06 | 0.247 | 0.199 |          |       |     | <i>KCTD1</i>        | 5'UTR   |
| cg06830319 | 16 | 57,406,074  | 6.43E-11 | 0.247 | 0.249 |          |       |     | <i>CX3CL1</i>       | TSS1500 |
| cg17884327 | 3  | 197,840,760 | 2.07E-05 | 0.247 | 0.247 |          |       |     |                     |         |
| cg16829453 | 17 | 48,636,646  | 8.23E-05 | 0.247 | 0.208 |          |       |     |                     |         |
| cg19601328 | 17 | 43,368,729  | 0.013505 | 0.247 | 0.325 | 2.69E-17 | 0.266 |     | <i>MAP3K14</i>      | 5'UTR   |
| cg04819096 | 12 | 54,339,167  | 0.000313 | 0.247 | 0.239 |          |       |     | <i>HOXC13</i>       | 3'UTR   |
| cg17455088 | 2  | 206,551,466 | 2.75E-06 | 0.247 | 0.228 |          |       |     | <i>NRP2</i>         | Body    |
| cg16105461 | 11 | 61,485,853  | 7.67E-12 | 0.247 | 0.250 |          |       |     | <i>DAGLA</i>        | 5'UTR   |
| cg19003304 | 8  | 60,029,914  | 1.47E-05 | 0.247 | 0.223 |          |       |     | <i>TOX</i>          | Body    |
| cg27033805 | 8  | 145,499,436 | 7.29E-05 | 0.247 | 0.258 |          |       |     | <i>BOP1</i>         | Body    |
| cg08584947 | 8  | 93,468,317  | 5.26E-05 | 0.247 | 0.259 |          |       |     |                     |         |
| cg11528328 | 21 | 36,041,683  | 0.000533 | 0.247 | 0.248 |          |       |     | <i>CLIC6</i>        | TSS200  |
| cg18987335 | 2  | 177,039,862 | 0.000378 | 0.247 | 0.209 |          |       |     |                     |         |
| cg23712458 | 17 | 189,002     | 1.84E-12 | 0.247 | 0.217 |          |       |     | <i>RPH3AL</i>       | 5'UTR   |
| cg25101657 | 17 | 32,751,628  | 0.003187 | 0.247 | 0.339 |          |       |     |                     |         |
| cg19668476 | 4  | 153,506,267 | 7.9E-06  | 0.247 | 0.257 |          |       |     |                     |         |
| cg23681339 | 12 | 133,065,808 | 8.59E-05 | 0.247 | 0.182 |          |       |     | <i>FBRSL1</i>       | TSS1500 |
| cg03578926 | 11 | 70,508,032  | 6.48E-06 | 0.247 | 0.231 |          |       |     | <i>SHANK2</i>       | Body    |
| cg18024113 | 1  | 16,862,202  | 8.07E-05 | 0.247 | 0.299 |          |       |     |                     |         |
| cg06299307 | 16 | 10,133,466  | 0.035513 | 0.247 | 0.232 |          |       |     | <i>GRIN2A</i>       | Body    |
| cg05955675 | 16 | 85,206,653  | 1.28E-09 | 0.247 | 0.236 |          |       |     |                     |         |
| cg19664945 | 2  | 54,087,343  | 0.007808 | 0.247 | 0.129 | 1.39E-11 | 0.191 |     | <i>LOC100302652</i> | TSS200  |
| cg24603113 | 7  | 1,105,321   | 1.63E-13 | 0.247 | 0.237 |          |       |     | <i>C7orf50</i>      | Body    |



|            |    |             |          |       |       |          |       |     |                |         |
|------------|----|-------------|----------|-------|-------|----------|-------|-----|----------------|---------|
| cg05323725 | 17 | 35,294,713  | 0.000949 | 0.247 | 0.182 |          |       |     | <i>LHX1</i>    | 1stExon |
| cg24883265 | 1  | 5,917,845   | 7.1E-12  | 0.247 | 0.226 |          |       |     |                |         |
| cg03942051 | 1  | 119,532,655 | 5.86E-09 | 0.247 | 0.242 |          |       |     | <i>TBX15</i>   | TSS1500 |
| cg15734553 | 19 | 11,960,208  | 0.049738 | 0.247 | 0.110 |          |       |     |                |         |
| cg16554148 | 1  | 3,630,882   | 3.11E-12 | 0.247 | 0.231 |          |       | Yes | <i>TP73</i>    | Body    |
| cg16656979 | 15 | 37,403,242  | 0.036153 | 0.247 | 0.169 |          |       |     |                |         |
| cg00930833 | 8  | 41,168,264  | 2.11E-08 | 0.247 | 0.218 |          |       |     | <i>SFRP1</i>   | TSS1500 |
| cg19194233 | 22 | 50,523,801  | 0.000254 | 0.247 | 0.258 |          |       |     | <i>MLC1</i>    | 1stExon |
| cg24232444 | 13 | 99,545,448  | 2.35E-08 | 0.247 | 0.231 |          |       |     | <i>DOCK9</i>   | Body    |
| cg09346546 | 2  | 176,943,669 | 1.06E-06 | 0.247 | 0.222 |          |       |     |                |         |
| cg18294691 | 14 | 38,080,669  | 1.06E-06 | 0.247 | 0.263 |          |       |     |                |         |
| cg19051416 | 7  | 74,064,585  | 0.001843 | 0.247 | 0.290 |          |       |     |                |         |
| cg18523477 | 20 | 55,967,503  | 2.35E-16 | 0.247 | 0.231 |          |       |     | <i>RBM38</i>   | Body    |
| cg13679691 | 22 | 50,608,033  | 0.002051 | 0.247 | 0.161 |          |       |     | <i>PANX2</i>   | TSS1500 |
| cg15671450 | 6  | 29,895,116  | 5.5E-07  | 0.247 | 0.210 |          |       |     |                |         |
| cg21118367 | 1  | 184,460,875 | 2.9E-05  | 0.247 | 0.224 |          |       |     | <i>C1orf21</i> | Body    |
| cg10820551 | 22 | 45,608,345  | 5.19E-08 | 0.247 | 0.213 |          |       |     | <i>C22orf9</i> | Body    |
| cg21651000 | 8  | 71,129,472  | 8.37E-10 | 0.246 | 0.265 |          |       |     | <i>NCOA2</i>   | 5'UTR   |
| cg08927006 | 10 | 100,993,556 | 1.15E-06 | 0.246 | 0.241 |          |       |     | <i>HPSE2</i>   | Body    |
| cg09712464 | 17 | 2,627,328   | 2.03E-05 | 0.246 | 0.240 |          |       |     |                |         |
| cg25605307 | 1  | 183,965,312 | 1.96E-10 | 0.246 | 0.232 |          |       |     | <i>GLT25D2</i> | Body    |
| cg23248887 | 14 | 38,679,643  | 3.05E-08 | 0.246 | 0.218 |          |       |     | <i>SSTR1</i>   | Body    |
| cg16658255 | 5  | 598,906     | 0.000383 | 0.246 | 0.247 |          |       |     |                |         |
| cg24736989 | 14 | 60,973,904  | 0.017695 | 0.246 | 0.231 |          |       |     |                |         |
| cg06864853 | 7  | 134,143,971 | 0.006876 | 0.246 | 0.202 |          |       |     | <i>AKR1B1</i>  | TSS200  |
| cg24378559 | 7  | 156,889,254 | 7.08E-06 | 0.246 | 0.212 |          |       |     |                |         |
| cg01112452 | X  | 117,958,532 | 7.05E-05 | 0.246 | 0.248 | 3.89E-19 | 0.155 |     | <i>ZCCHC12</i> | 5'UTR   |
| cg19770292 | 5  | 1,868,693   | 8.19E-06 | 0.246 | 0.278 |          |       | Yes |                |         |
| cg07489869 | 13 | 20,806,730  | 4.37E-05 | 0.246 | 0.179 |          |       |     | <i>GJB6</i>    | TSS200  |
| cg15323253 | 6  | 3,766,662   | 9.94E-06 | 0.246 | 0.195 |          |       |     |                |         |
| cg18063312 | 5  | 72,740,737  | 0.012711 | 0.246 | 0.186 |          |       |     |                |         |
| cg21268984 | 1  | 8,720,599   | 1.28E-07 | 0.246 | 0.263 |          |       |     | <i>RERE</i>    | 5'UTR   |
| cg08354406 | 10 | 115,370,978 | 0.012566 | 0.246 | 0.278 |          |       |     | <i>NRAP</i>    | Body    |
| cg08743751 | 5  | 66,462,471  | 0.002659 | 0.246 | 0.244 |          |       |     | <i>MAST4</i>   | Body    |

|            |    |             |          |       |       |          |       |     |                  |         |
|------------|----|-------------|----------|-------|-------|----------|-------|-----|------------------|---------|
| cg19653417 | 12 | 132,654,924 | 0.002614 | 0.246 | 0.221 |          |       |     |                  |         |
| cg01273232 | 15 | 93,652,756  | 2.03E-05 | 0.246 | 0.239 |          |       |     |                  |         |
| cg05869699 | 10 | 82,258,734  | 0.032867 | 0.246 | 0.183 |          |       |     | <i>TSPAN14</i>   | Body    |
| cg13721989 | 9  | 130,689,253 | 6.91E-20 | 0.246 | 0.217 |          |       |     | <i>PIP5KL1</i>   | Body    |
| cg18669209 | 18 | 44,777,736  | 0.0484   | 0.246 | 0.224 |          |       |     |                  |         |
| cg08404028 | 16 | 23,766,112  | 0.008645 | 0.246 | 0.306 |          |       |     | <i>CHP2</i>      | 1stExon |
| cg02299328 | 17 | 38,346,960  | 2.53E-16 | 0.246 | 0.228 |          |       |     | <i>RAPGEFL1</i>  | Body    |
| cg17631390 | 15 | 42,174,823  | 3.94E-09 | 0.246 | 0.221 |          |       |     | <i>SPTBN5</i>    | Body    |
| cg17854454 | 5  | 77,140,243  | 0.001255 | 0.246 | 0.185 |          |       |     |                  |         |
| cg24159636 | 6  | 18,043,467  | 1.53E-14 | 0.246 | 0.254 |          |       |     |                  |         |
| cg24630419 | 1  | 217,311,608 | 1.15E-08 | 0.246 | 0.237 |          |       |     | <i>ESRRG</i>     | TSS1500 |
| cg16197636 | 8  | 42,234,724  | 9.8E-08  | 0.246 | 0.250 |          |       |     | <i>DKK4</i>      | TSS200  |
| cg18991601 | 2  | 208,635,549 | 5.97E-08 | 0.246 | 0.244 |          |       |     | <i>FZD5</i>      | TSS1500 |
| cg06636289 | 1  | 40,781,617  | 0.005442 | 0.246 | 0.194 |          |       |     | <i>COL9A2</i>    | Body    |
| cg01825213 | 9  | 98,979,965  | 1.92E-06 | 0.246 | 0.247 |          |       |     |                  |         |
| cg14612428 | 18 | 11,751,566  | 7.74E-07 | 0.246 | 0.230 |          |       |     | <i>GNAL</i>      | 5'UTR   |
| cg00090261 | 8  | 101,118,548 | 0.000263 | 0.246 | 0.246 |          |       |     | <i>RGS22</i>     | TSS1500 |
| cg06100570 | 7  | 2,078,988   | 1.49E-11 | 0.246 | 0.237 |          |       |     | <i>MAD1L1</i>    | Body    |
| cg12393318 | 5  | 87,981,068  | 3.55E-07 | 0.246 | 0.288 |          |       |     | <i>LOC645323</i> | TSS1500 |
| cg15972560 | 4  | 82,136,940  | 0.001877 | 0.246 | 0.212 |          |       |     |                  |         |
| cg17890928 | 17 | 48,546,193  | 0.008838 | 0.246 | 0.233 |          |       |     | <i>ACSF2</i>     | Body    |
| cg11218954 | 2  | 45,164,864  | 1.71E-07 | 0.246 | 0.241 |          |       |     |                  |         |
| cg06391412 | 3  | 71,295,684  | 8.34E-13 | 0.246 | 0.203 |          |       |     | <i>FOXP1</i>     | 5'UTR   |
| cg02589685 | 11 | 2,889,629   | 5.4E-14  | 0.246 | 0.245 |          |       |     |                  |         |
| cg03283990 | 15 | 35,129,641  | 2.15E-05 | 0.246 | 0.175 |          |       |     |                  |         |
| cg15517113 | 2  | 620,265     | 1.69E-05 | 0.246 | 0.245 |          |       |     |                  |         |
| cg22775000 | 9  | 103,235,181 | 0.000897 | 0.246 | 0.157 | 2.54E-15 | 0.116 |     | <i>TMEFF1</i>    | TSS1500 |
| cg12081870 | 1  | 205,475,130 | 5.87E-14 | 0.246 | 0.226 |          |       |     | <i>CDK18</i>     | 5'UTR   |
| cg07990546 | 2  | 74,742,309  | 0.00413  | 0.246 | 0.297 |          |       |     | <i>TLX2</i>      | 1stExon |
| cg08129092 | 1  | 153,746,211 | 4.37E-10 | 0.246 | 0.254 |          |       |     | <i>INTS3</i>     | 3'UTR   |
| cg08828733 | 12 | 45,268,613  | 6.52E-08 | 0.246 | 0.218 |          |       |     | <i>NELL2</i>     | Body    |
| cg27223827 | 2  | 106,054,920 | 5.4E-18  | 0.246 | 0.236 | 1.24E-22 | 0.169 | Yes | <i>FHL2</i>      | 1stExon |
| cg14968300 | 8  | 23,585,186  | 1.79E-05 | 0.246 | 0.229 |          |       |     |                  |         |
| cg15986251 | 2  | 65,519,810  | 0.001442 | 0.246 | 0.259 |          |       |     |                  |         |

|            |    |             |          |       |       |          |       |  |                |         |
|------------|----|-------------|----------|-------|-------|----------|-------|--|----------------|---------|
| cg24541426 | 2  | 177,029,459 | 3.73E-06 | 0.246 | 0.199 |          |       |  | <i>HOXD3</i>   | 5'UTR   |
| cg27117828 | 2  | 175,499,377 | 0.01207  | 0.246 | 0.211 |          |       |  | <i>WIPF1</i>   | 5'UTR   |
| cg26375010 | X  | 118,407,852 | 0.021736 | 0.246 | 0.229 |          |       |  |                |         |
| cg26705724 | 15 | 41,061,984  | 4.63E-11 | 0.246 | 0.242 |          |       |  | <i>DNAJC17</i> | Body    |
| cg25513659 | 17 | 183,931     | 0.041304 | 0.246 | 0.137 |          |       |  | <i>RPH3AL</i>  | 5'UTR   |
| cg09827761 | 15 | 66,947,392  | 0.014922 | 0.246 | 0.148 |          |       |  |                |         |
| cg14023881 | 1  | 77,230,704  | 2.38E-09 | 0.246 | 0.186 |          |       |  |                |         |
| cg15481172 | 1  | 2,059,086   | 2.21E-10 | 0.246 | 0.240 |          |       |  | <i>PRKCZ</i>   | 5'UTR   |
| cg12817924 | X  | 13,588,162  | 0.000921 | 0.246 | 0.231 |          |       |  | <i>EGFL6</i>   | Body    |
| cg13423383 | 9  | 139,889,616 | 1.05E-15 | 0.246 | 0.204 |          |       |  | <i>CLIC3</i>   | Body    |
| cg11667020 | 20 | 21,378,045  | 0.018549 | 0.246 | 0.231 |          |       |  | <i>NKX2-4</i>  | 5'UTR   |
| cg23054181 | 15 | 99,048,945  | 0.00499  | 0.246 | 0.200 |          |       |  | <i>FAM169B</i> | 5'UTR   |
| cg25485913 | 19 | 49,568,962  | 2.12E-10 | 0.246 | 0.249 | 7.51E-27 | 0.132 |  |                |         |
| cg09095777 | 12 | 53,465,912  | 1.81E-14 | 0.246 | 0.252 |          |       |  | <i>SPRYD3</i>  | Body    |
| cg10906415 | 17 | 36,719,937  | 4.56E-05 | 0.246 | 0.233 |          |       |  | <i>SRCIN1</i>  | Body    |
| cg13977835 | 1  | 23,883,338  | 2.43E-07 | 0.246 | 0.275 |          |       |  |                |         |
| cg17588800 | 7  | 42,278,067  | 2.24E-11 | 0.246 | 0.229 |          |       |  | <i>GLI3</i>    | TSS1500 |
| cg19988426 | 10 | 130,064,021 | 0.040077 | 0.246 | 0.234 |          |       |  |                |         |
| cg26125625 | 3  | 124,860,871 | 2.8E-05  | 0.246 | 0.249 |          |       |  | <i>SLC12A8</i> | Body    |
| cg19929189 | 6  | 41,340,058  | 0.013335 | 0.246 | 0.266 |          |       |  |                |         |
| cg11529346 | 6  | 168,665,455 | 2.64E-07 | 0.246 | 0.262 |          |       |  |                |         |
| cg12573849 | 2  | 105,470,711 | 1.55E-08 | 0.246 | 0.230 |          |       |  | <i>POU3F3</i>  | TSS1500 |
| cg14453145 | 2  | 242,801,896 | 7.16E-07 | 0.246 | 0.225 |          |       |  | <i>PDCD1</i>   | TSS1500 |
| cg03782157 | 16 | 54,970,302  | 0.011849 | 0.246 | 0.302 |          |       |  |                |         |
| cg06495501 | 22 | 50,523,761  | 0.000189 | 0.246 | 0.257 |          |       |  | <i>MLC1</i>    | 5'UTR   |
| cg14311670 | 3  | 181,444,999 | 0.004788 | 0.246 | 0.269 |          |       |  | <i>SOX2OT</i>  | Body    |
| cg22635541 | 17 | 1,808,573   | 1.39E-20 | 0.246 | 0.195 |          |       |  |                |         |
| cg26345888 | 1  | 58,716,257  | 9.1E-07  | 0.246 | 0.193 |          |       |  | <i>DAB1</i>    | TSS200  |
| cg27282564 | 19 | 55,577,746  | 9.7E-09  | 0.246 | 0.269 |          |       |  | <i>RDH13</i>   | 5'UTR   |
| cg25457886 | 3  | 14,339,565  | 8.98E-06 | 0.246 | 0.249 |          |       |  |                |         |
| cg22996489 | 13 | 97,646,736  | 0.045122 | 0.246 | 0.334 |          |       |  | <i>OXGR1</i>   | TSS200  |
| cg09682128 | 13 | 100,613,240 | 6E-05    | 0.246 | 0.221 |          |       |  |                |         |
| cg11660018 | 11 | 86,510,915  | 9.72E-23 | 0.246 | 0.214 |          |       |  | <i>PRSS23</i>  | TSS1500 |
| cg21287054 | 19 | 54,928,012  | 0.012315 | 0.246 | 0.202 |          |       |  | <i>TTYH1</i>   | Body    |

|            |    |             |          |       |       |            |       |  |                  |         |
|------------|----|-------------|----------|-------|-------|------------|-------|--|------------------|---------|
| cg05460226 | 17 | 8,804,279   | 0.000249 | 0.246 | 0.320 |            |       |  | <i>PIK3R5</i>    | Body    |
| cg02388882 | 10 | 88,731,631  | 1.49E-05 | 0.246 | 0.236 |            |       |  | <i>AGAP11</i>    | 5'UTR   |
| cg07057744 | 17 | 4,545,074   | 0.003704 | 0.246 | 0.343 |            |       |  | <i>ALOX15</i>    | TSS200  |
| cg26415789 | 17 | 75,475,973  | 1.89E-20 | 0.246 | 0.232 |            |       |  | <i>SEPT9</i>     | Body    |
| cg11931762 | 20 | 9,488,920   | 2.49E-06 | 0.246 | 0.223 |            |       |  |                  |         |
| cg13157980 | 8  | 141,599,141 | 0.000142 | 0.246 | 0.196 |            |       |  | <i>EIF2C2</i>    | Body    |
| cg17105834 | 1  | 177,133,566 | 0.045774 | 0.246 | 0.293 |            |       |  | <i>ASTN1</i>     | 1stExon |
| cg10068989 | 11 | 129,244,122 | 0.000302 | 0.246 | 0.268 |            |       |  |                  |         |
| cg11485154 | 11 | 46,265,393  | 0.000821 | 0.246 | 0.152 |            |       |  |                  |         |
| cg26644885 | 16 | 72,981,599  | 1.14E-10 | 0.246 | 0.232 |            |       |  | <i>ZFH3</i>      | Body    |
| cg03301582 | 7  | 95,026,095  | 0.000153 | 0.246 | 0.233 |            |       |  | <i>PON3</i>      | TSS1500 |
| cg04565008 | 11 | 67,418,140  | 1.3E-14  | 0.246 | 0.236 |            |       |  | <i>ACY3</i>      | TSS200  |
| cg05756029 | 11 | 18,230,754  | 5.35E-12 | 0.246 | 0.247 |            |       |  | <i>LOC494141</i> | Body    |
| cg08131184 | 19 | 33,764,378  | 2.48E-15 | 0.246 | 0.239 |            |       |  |                  |         |
| cg18446336 | 7  | 2,847,575   | 4.07E-06 | 0.246 | 0.176 |            |       |  | <i>GNA12</i>     | Body    |
| cg08767182 | 5  | 92,940,163  | 8.44E-05 | 0.246 | 0.195 |            |       |  |                  |         |
| cg20255723 | 22 | 45,073,031  | 3.42E-14 | 0.246 | 0.225 |            |       |  | <i>PRR5</i>      | 5'UTR   |
| cg13647523 | 9  | 120,178,198 | 6.11E-07 | 0.246 | 0.285 |            |       |  | <i>ASTN2</i>     | TSS1500 |
| cg22523050 | 7  | 137,564,212 | 9.94E-11 | 0.246 | 0.247 |            |       |  | <i>CREB3L2</i>   | 3'UTR   |
| cg05766064 | 18 | 19,262,576  | 0.003123 | 0.246 | 0.217 |            |       |  | <i>ABHD3</i>     | Body    |
| cg12615535 | 3  | 139,257,713 | 7.5E-09  | 0.246 | 0.248 |            |       |  | <i>RBP1</i>      | Body    |
| cg20308679 | 2  | 183,731,407 | 0.049939 | 0.246 | 0.142 | 0.00131609 | 0.087 |  | <i>FRZB</i>      | 5'UTR   |
| cg05446860 | 20 | 25,129,126  | 0.004196 | 0.246 | 0.276 |            |       |  | <i>LOC284798</i> | Body    |
| cg04090347 | 21 | 44,061,597  | 1.37E-05 | 0.246 | 0.253 |            |       |  |                  |         |
| cg13969327 | 7  | 127,526,253 | 9.07E-12 | 0.246 | 0.244 |            |       |  | <i>SND1</i>      | Body    |
| cg10064871 | 11 | 6,341,908   | 3.74E-05 | 0.246 | 0.246 |            |       |  | <i>PRKCDBP</i>   | TSS200  |
| cg11435506 | 7  | 95,026,073  | 0.000976 | 0.246 | 0.197 |            |       |  | <i>PON3</i>      | TSS1500 |
| cg02856338 | 8  | 101,822,108 | 1.89E-07 | 0.246 | 0.243 |            |       |  |                  |         |
| cg06299284 | 11 | 636,659     | 0.003262 | 0.246 | 0.240 |            |       |  | <i>DRD4</i>      | TSS1500 |
| cg10635061 | 2  | 106,055,006 | 5.72E-11 | 0.246 | 0.264 | 2.28E-25   | 0.218 |  | <i>FHL2</i>      | 1stExon |
| cg11746924 | 17 | 62,007,912  | 2.1E-12  | 0.246 | 0.240 |            |       |  | <i>CD79B</i>     | Body    |
| cg27212729 | 2  | 171,570,838 | 0.008967 | 0.246 | 0.154 |            |       |  | <i>LOC440925</i> | Body    |
| cg26634121 | 16 | 88,897,219  | 7.29E-24 | 0.246 | 0.225 |            |       |  | <i>GALNS</i>     | Body    |
| cg01598596 | 3  | 187,464,648 | 0.000239 | 0.246 | 0.149 |            |       |  | <i>BCL6</i>      | TSS1500 |

|            |    |             |          |       |       |          |       |     |                 |         |
|------------|----|-------------|----------|-------|-------|----------|-------|-----|-----------------|---------|
| cg03936449 | 16 | 56,696,967  | 1.79E-05 | 0.246 | 0.248 |          |       |     |                 |         |
| cg18045100 | 5  | 3,764,541   | 0.000409 | 0.246 | 0.258 |          |       |     |                 |         |
| cg01416712 | 4  | 41,750,864  | 0.000495 | 0.246 | 0.272 |          |       |     | <i>PHOX2B</i>   | 1stExon |
| cg11344729 | 7  | 151,335,190 | 1.09E-21 | 0.246 | 0.249 |          |       |     | <i>PRKAG2</i>   | Body    |
| cg08812802 | 12 | 49,686,619  | 2.16E-06 | 0.246 | 0.270 |          |       |     |                 |         |
| cg15626285 | 12 | 7,167,781   | 0.002978 | 0.246 | 0.298 |          |       |     | <i>C1S</i>      | TSS200  |
| cg01940964 | 7  | 128,471,600 | 4.04E-05 | 0.246 | 0.230 |          |       |     | <i>FLNC</i>     | Body    |
| cg04474277 | 7  | 134,376,946 | 0.003479 | 0.246 | 0.285 |          |       |     |                 |         |
| cg05392244 | 6  | 1,575,286   | 1.37E-08 | 0.246 | 0.228 |          |       |     |                 |         |
| cg23217419 | 1  | 180,881,088 | 0.003828 | 0.246 | 0.215 |          |       |     | <i>KIAA1614</i> | TSS1500 |
| cg24624901 | 7  | 19,184,273  | 0.025256 | 0.246 | 0.280 |          |       |     |                 |         |
| cg26937778 | 14 | 96,562,667  | 1.06E-05 | 0.246 | 0.239 |          |       |     |                 |         |
| cg13035743 | 6  | 32,119,685  | 0.014579 | 0.246 | 0.225 | 4.35E-16 | 0.206 |     | <i>PRRT1</i>    | 1stExon |
| cg18631996 | 5  | 139,526,080 | 1.89E-13 | 0.246 | 0.219 |          |       |     |                 |         |
| cg05749969 | 1  | 38,412,711  | 2.65E-06 | 0.246 | 0.241 |          |       |     | <i>INPP5B</i>   | 5'UTR   |
| cg10168494 | 3  | 187,635,183 | 9.02E-08 | 0.246 | 0.220 |          |       |     |                 |         |
| cg16033633 | 13 | 100,624,855 | 0.000168 | 0.246 | 0.239 |          |       |     | <i>ZIC5</i>     | TSS1500 |
| cg16448890 | 3  | 8,783,613   | 0.000229 | 0.246 | 0.209 |          |       |     | <i>CAV3</i>     | Body    |
| cg20431250 | 6  | 108,492,653 | 9.39E-05 | 0.246 | 0.257 |          |       |     | <i>NR2E1</i>    | Body    |
| cg21779301 | 7  | 30,029,757  | 0.014776 | 0.246 | 0.103 |          |       |     | <i>SCRN1</i>    | TSS1500 |
| cg04112211 | 5  | 87,436,327  | 0.009236 | 0.245 | 0.189 |          |       |     |                 |         |
| cg06601581 | 16 | 85,404,654  | 0.00189  | 0.245 | 0.159 |          |       |     |                 |         |
| cg00107772 | 14 | 57,261,886  | 0.000627 | 0.245 | 0.192 |          |       |     |                 |         |
| cg22820364 | 14 | 81,901,540  | 1.57E-05 | 0.245 | 0.235 |          |       |     |                 |         |
| cg16990168 | 1  | 119,526,060 | 0.000604 | 0.245 | 0.238 |          |       |     | <i>TBX15</i>    | 5'UTR   |
| cg25429640 | 5  | 176,302,913 | 0.001099 | 0.245 | 0.263 |          |       |     | <i>UNC5A</i>    | Body    |
| cg17124224 | 15 | 83,953,880  | 6.92E-06 | 0.245 | 0.234 |          |       |     | <i>BNC1</i>     | TSS1500 |
| cg18142262 | 2  | 180,293,643 | 0.000276 | 0.245 | 0.239 |          |       |     |                 |         |
| cg09870568 | 3  | 138,154,278 | 1.05E-05 | 0.245 | 0.246 |          |       | Yes | <i>ESYT3</i>    | Body    |
| cg05259836 | 6  | 74,290,516  | 0.004303 | 0.245 | 0.247 |          |       |     |                 |         |
| cg07839742 | 6  | 84,761,960  | 0.000422 | 0.245 | 0.288 |          |       |     | <i>MRAP2</i>    | 5'UTR   |
| cg14189571 | 4  | 188,916,943 | 8.55E-06 | 0.245 | 0.238 | 4.75E-10 | 0.205 |     | <i>ZFP42</i>    | 1stExon |
| cg15721666 | 12 | 120,799,597 | 2.58E-45 | 0.245 | 0.242 |          |       |     | <i>MSI1</i>     | Body    |
| cg26708483 | 5  | 131,422,110 | 2.39E-09 | 0.245 | 0.251 |          |       | Yes |                 |         |

|            |    |             |          |       |       |           |       |  |                 |         |
|------------|----|-------------|----------|-------|-------|-----------|-------|--|-----------------|---------|
| cg08634318 | 3  | 13,323,642  | 6.18E-06 | 0.245 | 0.223 |           |       |  |                 |         |
| cg18798099 | 9  | 140,189,618 | 2.69E-17 | 0.245 | 0.224 |           |       |  |                 |         |
| cg24219033 | 17 | 7,485,218   | 1.11E-07 | 0.245 | 0.265 |           |       |  | <i>CD68</i>     | 3'UTR   |
| cg09479650 | 16 | 85,578,516  | 1.38E-20 | 0.245 | 0.217 |           |       |  |                 |         |
| cg10864680 | 13 | 108,922,274 | 0.000141 | 0.245 | 0.238 |           |       |  | <i>TNFSF13B</i> | 1stExon |
| cg27177554 | 10 | 16,562,102  | 2.1E-05  | 0.245 | 0.261 |           |       |  | <i>C1QL3</i>    | Body    |
| cg13371788 | 6  | 117,586,817 | 0.030753 | 0.245 | 0.254 |           |       |  | <i>VGLL2</i>    | 1stExon |
| cg16431436 | 5  | 82,768,907  | 0.020492 | 0.245 | 0.115 |           |       |  | <i>VCAN</i>     | 5'UTR   |
| cg16170708 | 1  | 6,390,830   | 3.55E-25 | 0.245 | 0.229 |           |       |  | <i>ACOT7</i>    | Body    |
| cg00741609 | 10 | 102,893,925 | 0.000549 | 0.245 | 0.258 |           |       |  | <i>TLX1</i>     | Body    |
| cg23861803 | 6  | 31,830,030  | 0.026027 | 0.245 | 0.211 |           |       |  | <i>NEU1</i>     | Body    |
| cg26314055 | 1  | 1,182,658   | 0.002891 | 0.245 | 0.289 |           |       |  | <i>FAM132A</i>  | TSS1500 |
| cg03144232 | 16 | 31,022,351  | 0.026378 | 0.245 | 0.270 |           |       |  | <i>STX1B</i>    | TSS1500 |
| cg07729130 | 11 | 45,167,493  | 0.027019 | 0.245 | 0.224 |           |       |  | <i>PRDM11</i>   | Body    |
| cg09145546 | 16 | 56,696,748  | 5.65E-06 | 0.245 | 0.236 |           |       |  |                 |         |
| cg27036111 | 11 | 20,620,680  | 0.000622 | 0.245 | 0.289 |           |       |  | <i>SLC6A5</i>   | TSS1500 |
| cg10540626 | 2  | 71,124,470  | 0.000001 | 0.245 | 0.253 |           |       |  |                 |         |
| cg14319235 | 1  | 79,472,282  | 0.0004   | 0.245 | 0.215 |           |       |  | <i>ELTD1</i>    | Body    |
| cg14334389 | 4  | 88,451,346  | 0.000954 | 0.245 | 0.299 |           |       |  | <i>SPARCL1</i>  | TSS1500 |
| cg05022789 | 8  | 135,469,681 | 0.038589 | 0.245 | 0.173 |           |       |  |                 |         |
| cg14405893 | 9  | 127,539,942 | 0.011794 | 0.245 | 0.198 |           |       |  | <i>OLFML2A</i>  | Body    |
| cg05384646 | 15 | 30,206,862  | 1.03E-12 | 0.245 | 0.249 |           |       |  |                 |         |
| cg09840968 | 15 | 37,394,840  | 0.032367 | 0.245 | 0.336 |           |       |  | <i>MEIS2</i>    | TSS1500 |
| cg12727529 | 3  | 42,307,761  | 3.14E-20 | 0.245 | 0.248 |           |       |  | <i>CCK</i>      | TSS1500 |
| cg14211310 | 7  | 7,557,741   | 4.46E-08 | 0.245 | 0.221 |           |       |  | <i>COL28A1</i>  | Body    |
| cg14396619 | 7  | 98,424,185  | 0.000118 | 0.245 | 0.218 |           |       |  |                 |         |
| cg26183870 | 14 | 100,142,298 | 1.73E-07 | 0.245 | 0.197 |           |       |  | <i>HHIPL1</i>   | 3'UTR   |
| cg10796603 | X  | 133,676,860 | 1.75E-16 | 0.245 | 0.222 |           |       |  | <i>MIR542</i>   | TSS1500 |
| cg18888461 | 11 | 18,477,379  | 2.28E-05 | 0.245 | 0.186 |           |       |  | <i>LDHAL6A</i>  | 1stExon |
| cg03704031 | X  | 70,712,215  | 1.55E-05 | 0.245 | 0.192 | 0.0000131 | 0.144 |  | <i>INGX</i>     | Body    |
| cg03339247 | 16 | 73,059,888  | 3.16E-05 | 0.245 | 0.222 |           |       |  | <i>ZFH3</i>     | 5'UTR   |
| cg06619938 | 12 | 54,376,127  | 1.9E-07  | 0.245 | 0.229 |           |       |  |                 |         |
| cg07525782 | 5  | 33,324,641  | 3.18E-15 | 0.245 | 0.237 |           |       |  |                 |         |
| cg18084609 | 14 | 31,345,041  | 7.23E-17 | 0.245 | 0.241 |           |       |  | <i>COCH</i>     | Body    |

|            |    |             |          |       |       |          |       |  |                 |         |
|------------|----|-------------|----------|-------|-------|----------|-------|--|-----------------|---------|
| cg22522598 | 19 | 15,360,953  | 2.12E-20 | 0.245 | 0.241 |          |       |  | <i>BRD4</i>     | Body    |
| cg01916088 | 6  | 41,528,531  | 3.99E-08 | 0.245 | 0.236 |          |       |  | <i>FOXP4</i>    | 5'UTR   |
| cg04203587 | 4  | 75,895,612  | 8.63E-20 | 0.245 | 0.237 |          |       |  | <i>PARM1</i>    | Body    |
| cg12386646 | 15 | 41,787,261  | 0.000228 | 0.245 | 0.251 |          |       |  | <i>ITPKA</i>    | Body    |
| cg00164458 | 1  | 225,676,425 | 2.77E-10 | 0.245 | 0.236 |          |       |  | <i>ENAH</i>     | 3'UTR   |
| cg02697649 | 2  | 202,901,045 | 4.36E-07 | 0.245 | 0.253 |          |       |  | <i>FZD7</i>     | 1stExon |
| cg09949775 | 19 | 18,902,107  | 0.000123 | 0.245 | 0.195 | 3.69E-17 | 0.158 |  | <i>COMP</i>     | 1stExon |
| cg09224689 | 11 | 31,825,166  | 0.024931 | 0.245 | 0.304 |          |       |  | <i>PAX6</i>     | Body    |
| cg25617328 | 5  | 76,939,333  | 1.97E-12 | 0.245 | 0.216 |          |       |  |                 |         |
| cg19772399 | 11 | 133,825,319 | 0.002556 | 0.245 | 0.217 |          |       |  | <i>IGSF9B</i>   | Body    |
| cg10703784 | 12 | 28,127,353  | 0.00132  | 0.245 | 0.277 |          |       |  |                 |         |
| cg14952949 | 12 | 81,109,806  | 1.01E-13 | 0.245 | 0.229 |          |       |  | <i>MYF5</i>     | TSS1500 |
| cg27105390 | 19 | 23,253,316  | 1.1E-05  | 0.245 | 0.266 |          |       |  |                 |         |
| cg00268086 | 17 | 5,487,376   | 3.28E-06 | 0.245 | 0.258 |          |       |  | <i>NLRP1</i>    | 5'UTR   |
| cg15608301 | 13 | 100,085,187 | 5.4E-07  | 0.245 | 0.191 |          |       |  |                 |         |
| cg04452770 | 12 | 53,267,981  | 0.029618 | 0.245 | 0.192 |          |       |  |                 |         |
| cg24989193 | 10 | 105,540,623 | 1.84E-07 | 0.245 | 0.216 |          |       |  | <i>SH3PXD2A</i> | Body    |
| cg25250968 | 6  | 11,318,770  | 5.1E-06  | 0.245 | 0.236 |          |       |  | <i>NEDD9</i>    | 5'UTR   |
| cg03858703 | 3  | 68,316,096  | 0.00534  | 0.245 | 0.179 |          |       |  | <i>FAM19A1</i>  | Body    |
| cg06945399 | 7  | 127,671,195 | 0.007204 | 0.245 | 0.163 |          |       |  | <i>LRRC4</i>    | TSS200  |
| cg20168495 | 4  | 148,283,066 | 1.1E-06  | 0.245 | 0.243 |          |       |  |                 |         |
| cg12974599 | 22 | 46,770,195  | 3.35E-10 | 0.245 | 0.228 |          |       |  | <i>CELSR1</i>   | Body    |
| cg26608174 | 17 | 46,711,035  | 9.4E-06  | 0.245 | 0.217 |          |       |  | <i>MIR196A1</i> | TSS1500 |
| cg06212263 | 21 | 34,392,851  | 0.000808 | 0.245 | 0.219 |          |       |  |                 |         |
| cg17788832 | 8  | 87,081,654  | 1.01E-11 | 0.245 | 0.248 | 3.55E-31 | 0.195 |  | <i>PSKH2</i>    | Body    |
| cg04948892 | 3  | 181,428,462 | 3.87E-06 | 0.245 | 0.238 |          |       |  | <i>SOX2OT</i>   | Body    |
| cg13925809 | 9  | 84,646,696  | 9.36E-05 | 0.245 | 0.291 |          |       |  |                 |         |
| cg21195468 | 9  | 126,773,095 | 1.98E-09 | 0.245 | 0.256 |          |       |  | <i>LHX2</i>     | TSS1500 |
| cg10431481 | 1  | 45,249,875  | 0.003817 | 0.245 | 0.323 |          |       |  | <i>BEST4</i>    | 3'UTR   |
| cg16026813 | 10 | 103,245,720 | 8.79E-06 | 0.245 | 0.251 |          |       |  | <i>BTRC</i>     | Body    |
| cg18584387 | 12 | 4,384,879   | 0.002523 | 0.245 | 0.264 |          |       |  | <i>CCND2</i>    | Body    |
| cg04076682 | 11 | 32,915,823  | 0.005795 | 0.245 | 0.304 |          |       |  | <i>QSER1</i>    | 5'UTR   |
| cg17296589 | 13 | 113,366,074 | 0.000133 | 0.245 | 0.145 |          |       |  | <i>ATP11A</i>   | Body    |
| cg22076941 | 1  | 70,036,106  | 0.000218 | 0.245 | 0.251 |          |       |  |                 |         |

|            |    |             |          |       |       |          |       |  |           |         |
|------------|----|-------------|----------|-------|-------|----------|-------|--|-----------|---------|
| cg08271804 | 19 | 22,816,896  | 0.014036 | 0.245 | 0.237 |          |       |  | ZNF492    | TSS1500 |
| cg16642520 | 2  | 54,936,739  | 6.4E-05  | 0.245 | 0.196 |          |       |  |           |         |
| cg07885629 | 7  | 129,422,915 | 3.23E-05 | 0.245 | 0.247 |          |       |  |           |         |
| cg11348293 | 2  | 219,926,334 | 0.004562 | 0.245 | 0.156 |          |       |  | IHH       | TSS1500 |
| cg07082484 | 4  | 170,075,731 | 3E-05    | 0.245 | 0.254 |          |       |  | SH3RF1    | Body    |
| cg15662251 | 1  | 26,197,855  | 2.43E-14 | 0.245 | 0.229 | 4.39E-24 | 0.224 |  | PAQR7     | TSS200  |
| cg09555736 | 16 | 474,271     | 0.002875 | 0.245 | 0.300 |          |       |  | RAB11FIP3 | TSS1500 |
| cg11878016 | 7  | 84,816,843  | 0.001621 | 0.245 | 0.253 |          |       |  |           |         |
| cg26221105 | 1  | 223,914,343 | 2.77E-06 | 0.245 | 0.240 |          |       |  | CAPN2     | Body    |
| cg04666975 | 14 | 60,977,353  | 0.002499 | 0.245 | 0.198 |          |       |  | SIX6      | Body    |
| cg08190450 | 17 | 800,717     | 3.67E-07 | 0.245 | 0.234 |          |       |  | NXN       | Body    |
| cg23475955 | 11 | 1,985,762   | 1.47E-10 | 0.245 | 0.246 |          |       |  |           |         |
| cg04737114 | 7  | 96,654,931  | 0.00024  | 0.245 | 0.217 |          |       |  | DLX5      | TSS1500 |
| cg06352807 | 7  | 157,648,699 | 1.45E-11 | 0.245 | 0.228 |          |       |  | PTPRN2    | Body    |
| cg12621514 | 10 | 54,073,047  | 0.002172 | 0.245 | 0.272 | 5.02E-13 | 0.187 |  | DKK1      | TSS1500 |
| cg01337813 | 7  | 127,808,512 | 0.001628 | 0.245 | 0.216 |          |       |  |           |         |
| cg16115418 | X  | 3,630,582   | 1.83E-05 | 0.245 | 0.162 |          |       |  | PRKX      | Body    |
| cg10109500 | 3  | 172,165,884 | 0.011054 | 0.245 | 0.275 |          |       |  | GHSR      | 1stExon |
| cg15773794 | 2  | 172,957,583 | 0.006148 | 0.245 | 0.270 |          |       |  |           |         |
| cg00192882 | 17 | 19,291,120  | 2.02E-17 | 0.245 | 0.246 |          |       |  | MFAP4     | TSS1500 |
| cg19701879 | 4  | 23,881,105  | 3.22E-05 | 0.245 | 0.249 |          |       |  | PPARGC1A  | Body    |
| cg00161124 | 1  | 234,366,259 | 0.001124 | 0.245 | 0.181 |          |       |  | SLC35F3   | Body    |
| cg05470554 | 7  | 120,969,079 | 0.000645 | 0.245 | 0.251 |          |       |  | WNT16     | TSS200  |
| cg20438286 | 11 | 11,371,451  | 2.23E-14 | 0.245 | 0.241 |          |       |  | GALNTL4   | Body    |
| cg03994959 | 13 | 108,866,993 | 0.000121 | 0.245 | 0.117 |          |       |  | LIG4      | 5'UTR   |
| cg16884902 | 11 | 20,617,974  | 0.002172 | 0.245 | 0.266 |          |       |  |           |         |
| cg09180848 | 15 | 83,953,780  | 0.001976 | 0.245 | 0.224 |          |       |  | BNC1      | TSS1500 |
| cg21031345 | 11 | 121,800,497 | 0.010984 | 0.245 | 0.214 |          |       |  |           |         |
| cg06400704 | 1  | 240,256,644 | 0.040274 | 0.245 | 0.338 |          |       |  | FMN2      | 1stExon |
| cg09597806 | 15 | 28,351,607  | 0.012453 | 0.245 | 0.092 |          |       |  |           |         |
| cg23318893 | 6  | 29,974,083  | 5.09E-06 | 0.245 | 0.255 |          |       |  | HLA-J     | Body    |
| cg19348676 | 20 | 43,743,967  | 5.98E-16 | 0.245 | 0.246 |          |       |  | WFDC5     | TSS200  |
| cg20822579 | 14 | 24,809,073  | 1.38E-07 | 0.245 | 0.222 | 2.87E-16 | 0.182 |  | RIPK3     | 5'UTR   |
| cg03410359 | 6  | 28,574,635  | 0.007741 | 0.245 | 0.241 |          |       |  |           |         |



|            |    |             |          |       |       |  |  |  |               |         |
|------------|----|-------------|----------|-------|-------|--|--|--|---------------|---------|
| cg04468551 | 12 | 59,990,894  | 0.00494  | 0.245 | 0.339 |  |  |  |               |         |
| cg18020065 | 13 | 114,829,733 | 0.010308 | 0.245 | 0.140 |  |  |  | <i>RASA3</i>  | Body    |
| cg26101485 | 8  | 142,264,769 | 8.04E-15 | 0.245 | 0.264 |  |  |  |               |         |
| cg15292765 | 10 | 34,405,759  | 3.51E-09 | 0.245 | 0.237 |  |  |  | <i>PARD3</i>  | Body    |
| cg01408363 | 12 | 125,033,903 | 3.89E-12 | 0.245 | 0.230 |  |  |  |               |         |
| cg02621287 | 12 | 11,653,278  | 0.036009 | 0.245 | 0.250 |  |  |  |               |         |
| cg06865451 | 1  | 39,035,934  | 0.00038  | 0.245 | 0.208 |  |  |  |               |         |
| cg13957126 | 7  | 5,597,849   | 0.000514 | 0.245 | 0.214 |  |  |  |               |         |
| cg25009504 | 18 | 21,269,793  | 0.018907 | 0.245 | 0.255 |  |  |  | <i>LAMA3</i>  | 1stExon |
| cg08486575 | 16 | 30,908,490  | 0.048305 | 0.245 | 0.332 |  |  |  | <i>CTF1</i>   | Body    |
| cg05527507 | 1  | 861,265     | 0.000495 | 0.245 | 0.242 |  |  |  | <i>SAMD11</i> | 5'UTR   |
| cg22957135 | 14 | 33,409,651  | 3.42E-09 | 0.245 | 0.237 |  |  |  | <i>NPAS3</i>  | Body    |
| cg04190618 | 11 | 46,938,492  | 0.014385 | 0.245 | 0.180 |  |  |  | <i>LRP4</i>   | Body    |
| cg04578903 | 1  | 21,754,899  | 1.47E-05 | 0.245 | 0.198 |  |  |  |               |         |
| cg18072282 | 22 | 37,976,192  | 8.1E-10  | 0.245 | 0.259 |  |  |  | <i>LGALS2</i> | TSS200  |
| cg05945782 | 17 | 1,954,986   | 1.43E-07 | 0.245 | 0.264 |  |  |  | <i>MIR212</i> | TSS1500 |
| cg13305444 | 1  | 225,838,196 | 0.000345 | 0.245 | 0.298 |  |  |  | <i>ENAH</i>   | Body    |
| cg19868691 | 2  | 219,744,597 | 0.001566 | 0.245 | 0.271 |  |  |  | <i>WNT10A</i> | TSS1500 |
| cg16700920 | 10 | 133,810,060 | 1.17E-66 | 0.245 | 0.246 |  |  |  |               |         |
| cg27116888 | 18 | 76,746,337  | 0.038646 | 0.245 | 0.312 |  |  |  | <i>SALL3</i>  | Body    |
| cg02213684 | 5  | 134,366,534 | 0.007835 | 0.245 | 0.315 |  |  |  | <i>PITX1</i>  | Body    |
| cg03494022 | 18 | 43,992,823  | 1.96E-08 | 0.245 | 0.277 |  |  |  | <i>RNF165</i> | Body    |
| cg22192489 | 5  | 134,521,633 | 1.66E-10 | 0.245 | 0.217 |  |  |  |               |         |
| cg06913330 | 4  | 2,060,313   | 0.009389 | 0.245 | 0.125 |  |  |  | <i>NAT8L</i>  | TSS1500 |
| cg07200957 | 5  | 58,334,676  | 7.84E-05 | 0.245 | 0.248 |  |  |  | <i>PDE4D</i>  | Body    |
| cg11530678 | 15 | 67,081,012  | 3E-26    | 0.245 | 0.227 |  |  |  |               |         |
| cg06632098 | 10 | 43,605,906  | 7.02E-12 | 0.245 | 0.244 |  |  |  | <i>RET</i>    | Body    |
| cg14463068 | 2  | 1,820,315   | 1.55E-06 | 0.245 | 0.239 |  |  |  | <i>MYT1L</i>  | Body    |
| cg17877071 | 3  | 49,460,177  | 1.39E-12 | 0.245 | 0.246 |  |  |  | <i>AMT</i>    | TSS200  |
| cg25752163 | 12 | 111,470,657 | 1.93E-10 | 0.245 | 0.249 |  |  |  | <i>CUX2</i>   | TSS1500 |
| cg12317601 | 10 | 119,301,760 | 0.049922 | 0.244 | 0.315 |  |  |  | <i>EMX2</i>   | TSS200  |
| cg14152222 | 11 | 68,780,661  | 2.03E-08 | 0.244 | 0.260 |  |  |  | <i>MRGPRF</i> | 5'UTR   |
| cg17876497 | 10 | 88,731,295  | 0.002275 | 0.244 | 0.187 |  |  |  | <i>AGAP11</i> | 5'UTR   |
| cg14718065 | 2  | 131,010,763 | 1.02E-12 | 0.244 | 0.192 |  |  |  |               |         |

|            |    |             |          |       |       |          |       |     |  |                |         |
|------------|----|-------------|----------|-------|-------|----------|-------|-----|--|----------------|---------|
| cg16034168 | 1  | 6,336,711   | 2.67E-11 | 0.244 | 0.234 |          |       |     |  | <i>ACOT7</i>   | Body    |
| cg24585203 | 11 | 27,105,814  | 6.22E-17 | 0.244 | 0.236 |          |       |     |  | <i>BBOX1</i>   | Body    |
| cg13288195 | 15 | 63,889,711  | 4.93E-13 | 0.244 | 0.234 | 4.09E-14 | 0.235 |     |  | <i>FBXL22</i>  | 1stExon |
| cg14437725 | 9  | 137,787,387 | 0.000239 | 0.244 | 0.279 |          |       |     |  |                |         |
| cg25705148 | 2  | 72,079,498  | 5.87E-12 | 0.244 | 0.224 |          |       |     |  |                |         |
| cg10800464 | 12 | 109,162,641 | 0.012298 | 0.244 | 0.129 |          |       |     |  |                |         |
| cg18391937 | 14 | 55,539,537  | 0.000226 | 0.244 | 0.245 |          |       |     |  |                |         |
| cg05922610 | 6  | 108,495,985 | 3.11E-05 | 0.244 | 0.251 |          |       |     |  | <i>NR2E1</i>   | Body    |
| cg08582356 | 8  | 86,351,018  | 4.88E-05 | 0.244 | 0.270 |          |       |     |  | <i>CA3</i>     | TSS200  |
| cg13033722 | 6  | 43,111,240  | 1.66E-11 | 0.244 | 0.215 |          |       |     |  | <i>PTK7</i>    | Body    |
| cg25403283 | 10 | 63,629,487  | 0.000501 | 0.244 | 0.241 |          |       |     |  |                |         |
| cg18742814 | 1  | 41,828,276  | 1.33E-05 | 0.244 | 0.246 |          |       |     |  |                |         |
| cg24994355 | 10 | 99,445,520  | 5.39E-07 | 0.244 | 0.208 |          |       | Yes |  | <i>AVPI1</i>   | 5'UTR   |
| cg01882113 | 2  | 206,724,023 | 1.2E-13  | 0.244 | 0.223 |          |       |     |  |                |         |
| cg03915432 | 2  | 101,428,924 | 3.9E-12  | 0.244 | 0.243 |          |       |     |  |                |         |
| cg04293152 | 16 | 3,085,468   | 1.71E-12 | 0.244 | 0.241 |          |       |     |  | <i>CCDC64B</i> | 1stExon |
| cg05260966 | 22 | 33,197,394  | 1.09E-08 | 0.244 | 0.227 | 3.58E-27 | 0.166 |     |  | <i>SYN3</i>    | Body    |
| cg06556244 | 7  | 143,089,459 | 8E-11    | 0.244 | 0.243 |          |       |     |  | <i>EPHA1</i>   | Body    |
| cg19485202 | 19 | 18,902,081  | 1.57E-05 | 0.244 | 0.192 |          |       |     |  | <i>COMP</i>    | 1stExon |
| cg13459035 | 7  | 135,369,001 | 1.84E-15 | 0.244 | 0.247 |          |       |     |  | <i>SLC13A4</i> | Body    |
| cg17966344 | 7  | 102,071,463 | 0.001591 | 0.244 | 0.213 |          |       |     |  |                |         |
| cg06490225 | 17 | 35,298,825  | 1.56E-06 | 0.244 | 0.253 |          |       |     |  | <i>LHX1</i>    | Body    |
| cg15493618 | 4  | 154,714,069 | 0.00382  | 0.244 | 0.277 |          |       |     |  |                |         |
| cg22730464 | 5  | 94,955,816  | 0.010047 | 0.244 | 0.202 |          |       |     |  | <i>GPR150</i>  | TSS200  |
| cg23056703 | 3  | 5,470,788   | 1.01E-11 | 0.244 | 0.262 |          |       |     |  |                |         |
| cg02974898 | 1  | 23,105,600  | 9.97E-12 | 0.244 | 0.245 |          |       |     |  | <i>EPHB2</i>   | Body    |
| cg16032102 | 1  | 206,680,459 | 0.001088 | 0.244 | 0.203 |          |       |     |  | <i>RASSF5</i>  | TSS1500 |
| cg14578087 | 9  | 133,796,926 | 2.16E-20 | 0.244 | 0.247 |          |       |     |  | <i>FIBCD1</i>  | Body    |
| cg18868483 | 6  | 71,667,067  | 0.025438 | 0.244 | 0.102 |          |       |     |  | <i>B3GAT2</i>  | TSS1500 |
| cg03506640 | 14 | 85,997,753  | 0.008673 | 0.244 | 0.258 |          |       |     |  | <i>FLRT2</i>   | 5'UTR   |
| cg01734112 | 2  | 26,624,760  | 0.023427 | 0.244 | 0.056 |          |       |     |  | <i>C2orf39</i> | TSS200  |
| cg24128292 | 8  | 30,419,935  | 7.17E-14 | 0.244 | 0.241 |          |       |     |  | <i>RBPMS</i>   | 3'UTR   |
| cg15468976 | 1  | 2,106,222   | 2.83E-05 | 0.244 | 0.289 |          |       |     |  | <i>PRKCZ</i>   | Body    |
| cg22386583 | 17 | 78,753,756  | 1.37E-14 | 0.244 | 0.233 |          |       |     |  | <i>RPTOR</i>   | Body    |

|            |    |             |          |       |       |          |       |  |                     |         |
|------------|----|-------------|----------|-------|-------|----------|-------|--|---------------------|---------|
| cg04166432 | 2  | 181,843,717 | 4.15E-11 | 0.244 | 0.204 |          |       |  | <i>UBE2E3</i>       | TSS1500 |
| cg17827208 | 15 | 99,470,414  | 1.14E-10 | 0.244 | 0.225 |          |       |  | <i>IGF1R</i>        | Body    |
| cg19375537 | 1  | 46,951,589  | 0.001323 | 0.244 | 0.240 |          |       |  |                     |         |
| cg17075352 | 4  | 71,533,675  | 4.8E-11  | 0.244 | 0.267 |          |       |  | <i>IGJ</i>          | TSS1500 |
| cg09420907 | 12 | 4,273,763   | 0.021069 | 0.244 | 0.266 |          |       |  |                     |         |
| cg16004706 | 12 | 114,273,782 | 1.21E-06 | 0.244 | 0.193 |          |       |  | <i>RBM19</i>        | Body    |
| cg23279335 | 11 | 75,863,631  | 6.14E-10 | 0.244 | 0.263 |          |       |  |                     |         |
| cg23671279 | 8  | 140,969,608 | 1.56E-18 | 0.244 | 0.231 |          |       |  | <i>TRAPPC9</i>      | Body    |
| cg00594099 | 1  | 27,893,886  | 2.28E-07 | 0.244 | 0.259 |          |       |  | <i>AHDC1</i>        | 5'UTR   |
| cg07501233 | 13 | 100,641,900 | 0.000101 | 0.244 | 0.232 |          |       |  |                     |         |
| cg04517258 | 8  | 144,094,955 | 6.74E-09 | 0.244 | 0.217 |          |       |  | <i>LOC100133669</i> | Body    |
| cg05294243 | 19 | 51,569,106  | 0.00012  | 0.244 | 0.270 | 1.23E-12 | 0.168 |  | <i>KLK13</i>        | TSS1500 |
| cg11814235 | 18 | 28,621,490  | 0.006255 | 0.244 | 0.256 |          |       |  | <i>DSC3</i>         | Body    |
| cg16617301 | 19 | 46,999,109  | 4.45E-06 | 0.244 | 0.263 |          |       |  | <i>PNMAL2</i>       | 1stExon |
| cg11124021 | 4  | 10,024,412  | 0.000376 | 0.244 | 0.176 |          |       |  | <i>SLC2A9</i>       | TSS1500 |
| cg04052706 | 16 | 72,981,543  | 3.66E-13 | 0.244 | 0.222 |          |       |  | <i>ZFHX3</i>        | Body    |
| cg23504411 | 6  | 27,859,160  | 0.000162 | 0.244 | 0.244 |          |       |  | <i>HIST1H3J</i>     | TSS1500 |
| cg15539420 | 17 | 46,692,248  | 4.64E-06 | 0.244 | 0.191 | 2.57E-31 | 0.216 |  | <i>HOXB8</i>        | 5'UTR   |
| cg15717617 | 8  | 38,782,090  | 0.035615 | 0.244 | 0.155 |          |       |  | <i>PLEKHA2</i>      | Body    |
| cg02809404 | 14 | 67,656,029  | 2.9E-17  | 0.244 | 0.213 |          |       |  | <i>FAM71D</i>       | TSS200  |
| cg25105561 | 1  | 91,316,318  | 1.4E-06  | 0.244 | 0.218 |          |       |  |                     |         |
| cg06009215 | 5  | 113,647,903 | 1.74E-20 | 0.244 | 0.251 |          |       |  |                     |         |
| cg26037504 | 12 | 56,113,808  | 4.11E-11 | 0.244 | 0.249 |          |       |  | <i>RDH5</i>         | TSS1500 |
| cg06196755 | 19 | 31,839,734  | 0.034395 | 0.244 | 0.118 |          |       |  | <i>TSHZ3</i>        | Body    |
| cg11150074 | 1  | 200,863,559 | 1.76E-23 | 0.244 | 0.248 |          |       |  | <i>C1orf106</i>     | TSS1500 |
| cg12793733 | 4  | 47,488,620  | 2.01E-15 | 0.244 | 0.222 |          |       |  | <i>ATP10D</i>       | 5'UTR   |
| cg14645027 | 12 | 52,642,706  | 9.14E-18 | 0.244 | 0.221 |          |       |  | <i>KRT7</i>         | 3'UTR   |
| cg13217590 | 2  | 6,122,107   | 0.003166 | 0.244 | 0.274 |          |       |  | <i>LOC400940</i>    | TSS200  |
| cg04747322 | 5  | 121,647,308 | 0.03507  | 0.244 | 0.283 | 4.97E-18 | 0.199 |  | <i>SNCAIP</i>       | TSS1500 |
| cg08848140 | 9  | 124,982,018 | 7.4E-08  | 0.244 | 0.241 |          |       |  | <i>LHX6</i>         | Body    |
| cg10299976 | 10 | 94,455,543  | 9.97E-08 | 0.244 | 0.219 |          |       |  |                     |         |
| cg19494587 | 16 | 1,398,004   | 1.68E-06 | 0.244 | 0.225 |          |       |  | <i>BAIAP3</i>       | Body    |
| cg02523844 | 7  | 79,083,507  | 0.014323 | 0.244 | 0.206 |          |       |  | <i>MAGI2</i>        | TSS1500 |
| cg17411190 | 22 | 19,510,877  | 8.7E-05  | 0.244 | 0.235 |          |       |  | <i>CLDN5</i>        | 1stExon |

|            |    |             |          |       |       |            |       |     |                  |         |
|------------|----|-------------|----------|-------|-------|------------|-------|-----|------------------|---------|
| cg27646965 | 2  | 238,814,032 | 0.000104 | 0.244 | 0.216 |            |       |     | <i>RAMP1</i>     | Body    |
| cg07313162 | 5  | 34,587,700  | 6.71E-08 | 0.244 | 0.226 |            |       |     |                  |         |
| cg21901277 | 2  | 132,152,297 | 9.04E-10 | 0.244 | 0.233 |            |       |     |                  |         |
| cg15649236 | 17 | 46,657,504  | 0.000268 | 0.244 | 0.236 |            |       |     | <i>MIR10A</i>    | TSS200  |
| cg20120491 | 22 | 38,965,934  | 4E-05    | 0.244 | 0.234 | 1.55E-16   | 0.154 |     | <i>DMC1</i>      | 5'UTR   |
| cg00306311 | 4  | 17,783,936  | 3.07E-08 | 0.244 | 0.224 |            |       |     | <i>FAM184B</i>   | TSS1500 |
| cg12041387 | 7  | 96,650,171  | 8.25E-08 | 0.244 | 0.232 | 0.00714665 | 0.067 |     | <i>DLX5</i>      | Body    |
| cg14482968 | 9  | 137,599,175 | 1.02E-09 | 0.244 | 0.240 |            |       |     | <i>COL5A1</i>    | Body    |
| cg15371881 | 5  | 142,065,819 | 4.42E-10 | 0.244 | 0.215 |            |       |     | <i>FGF1</i>      | 5'UTR   |
| cg09621708 | 16 | 50,003,457  | 1.53E-09 | 0.244 | 0.216 |            |       |     |                  |         |
| cg06179765 | 7  | 23,287,352  | 0.002184 | 0.244 | 0.272 |            |       |     | <i>GPNMB</i>     | Body    |
| cg00253379 | 16 | 54,404,709  | 7.02E-06 | 0.244 | 0.221 |            |       |     |                  |         |
| cg24879560 | 3  | 65,342,971  | 1.21E-10 | 0.244 | 0.224 |            |       |     | <i>MAGI1</i>     | Body    |
| cg27457941 | 3  | 139,258,754 | 0.004591 | 0.244 | 0.109 | 4.2E-13    | 0.126 |     | <i>RBP1</i>      | TSS200  |
| cg06845853 | 11 | 32,461,240  | 0.046135 | 0.244 | 0.275 |            |       |     | <i>WIT1</i>      | Body    |
| cg07589381 | 1  | 10,764,512  | 1.2E-10  | 0.244 | 0.208 |            |       |     | <i>CASZ1</i>     | 5'UTR   |
| cg16877087 | 2  | 161,504,834 | 0.002131 | 0.244 | 0.190 |            |       |     |                  |         |
| cg15909981 | 22 | 37,465,178  | 1.35E-07 | 0.244 | 0.265 |            |       |     | <i>TMPRSS6</i>   | Body    |
| cg02341197 | 21 | 34,185,927  | 1.23E-13 | 0.244 | 0.230 |            |       |     | <i>C21orf62</i>  | 5'UTR   |
| cg15716680 | 11 | 12,864,037  | 0.023349 | 0.244 | 0.139 |            |       |     | <i>TEAD1</i>     | Body    |
| cg12996903 | 3  | 50,275,575  | 0.029465 | 0.244 | 0.144 |            |       |     | <i>GNAI2</i>     | Body    |
| cg27310024 | 15 | 90,950,101  | 1.3E-16  | 0.244 | 0.232 |            |       |     | <i>IQGAP1</i>    | Body    |
| cg25365260 | 17 | 46,669,781  | 9.92E-08 | 0.244 | 0.219 |            |       |     | <i>LOC404266</i> | Body    |
| cg07413251 | 3  | 27,771,667  | 0.049512 | 0.244 | 0.219 |            |       |     |                  |         |
| cg07279442 | 3  | 124,848,635 | 4.14E-21 | 0.244 | 0.227 |            |       |     | <i>SLC12A8</i>   | Body    |
| cg23163200 | 21 | 34,186,122  | 8.17E-07 | 0.244 | 0.225 |            |       |     | <i>C21orf62</i>  | TSS200  |
| cg26390660 | 3  | 110,344,165 | 2.68E-10 | 0.244 | 0.232 |            |       |     |                  |         |
| cg16181043 | 6  | 31,239,175  | 0.004356 | 0.244 | 0.256 |            |       |     | <i>HLA-C</i>     | Body    |
| cg00571041 | 3  | 62,352,633  | 0.001535 | 0.244 | 0.191 |            |       | Yes |                  |         |
| cg05351887 | 16 | 3,988,869   | 0.02488  | 0.244 | 0.308 |            |       |     |                  |         |
| cg05959170 | 3  | 62,353,312  | 0.000215 | 0.244 | 0.208 |            |       |     |                  |         |
| cg26755097 | 6  | 30,711,844  | 0.007844 | 0.244 | 0.211 |            |       |     | <i>FLOT1</i>     | TSS1500 |
| cg07785737 | 10 | 71,176,850  | 6.17E-19 | 0.244 | 0.239 |            |       |     | <i>TACR2</i>     | TSS200  |
| cg27481559 | 2  | 87,037,038  | 1.06E-06 | 0.244 | 0.231 |            |       |     |                  |         |

|            |    |             |          |       |       |          |       |  |                 |         |
|------------|----|-------------|----------|-------|-------|----------|-------|--|-----------------|---------|
| cg11207353 | 19 | 18,508,493  | 5.93E-09 | 0.244 | 0.225 |          |       |  | <i>LRR25</i>    | TSS200  |
| cg26865084 | 6  | 169,223,825 | 7.64E-08 | 0.244 | 0.227 |          |       |  |                 |         |
| cg01588379 | 7  | 151,433,326 | 1.2E-06  | 0.244 | 0.177 |          |       |  | <i>PRKAG2</i>   | Body    |
| cg21182715 | 12 | 95,567,919  | 3.77E-06 | 0.244 | 0.210 |          |       |  | <i>FGD6</i>     | Body    |
| cg05130081 | 7  | 157,867,264 | 4.51E-07 | 0.244 | 0.238 |          |       |  | <i>PTPRN2</i>   | Body    |
| cg18512963 | 3  | 131,430,364 | 6.62E-11 | 0.244 | 0.227 |          |       |  | <i>CPNE4</i>    | Body    |
| cg25256099 | 17 | 79,484,960  | 1.69E-09 | 0.244 | 0.230 |          |       |  |                 |         |
| cg06379721 | 10 | 102,590,401 | 0.001162 | 0.244 | 0.234 |          |       |  |                 |         |
| cg06794543 | 15 | 42,749,748  | 0.025562 | 0.244 | 0.180 |          |       |  | <i>ZFP106</i>   | TSS200  |
| cg07914866 | 12 | 66,583,431  | 2.01E-05 | 0.244 | 0.263 | 2.79E-10 | 0.109 |  | <i>IRAK3</i>    | Body    |
| cg26667550 | 1  | 156,098,772 | 3.94E-14 | 0.244 | 0.243 |          |       |  | <i>LMNA</i>     | Body    |
| cg04497512 | 21 | 36,042,224  | 0.001907 | 0.244 | 0.174 |          |       |  | <i>CLIC6</i>    | 1stExon |
| cg26551200 | 7  | 2,681,369   | 5.45E-14 | 0.244 | 0.239 |          |       |  | <i>TTYH3</i>    | Body    |
| cg03455762 | X  | 128,873,475 | 5.26E-14 | 0.244 | 0.257 |          |       |  | <i>XPNPEP2</i>  | Body    |
| cg04414946 | X  | 9,435,372   | 6.97E-21 | 0.244 | 0.258 |          |       |  | <i>TBL1X</i>    | 5'UTR   |
| cg05932042 | 17 | 40,822,653  | 1.13E-12 | 0.244 | 0.221 |          |       |  | <i>PLEKHH3</i>  | Body    |
| cg15133719 | 2  | 223,163,804 | 0.000412 | 0.244 | 0.225 |          |       |  | <i>PAX3</i>     | TSS200  |
| cg25707676 | 7  | 96,643,539  | 0.004406 | 0.244 | 0.277 |          |       |  | <i>DLX6AS</i>   | TSS200  |
| cg07504393 | 15 | 67,136,043  | 0.029837 | 0.244 | 0.086 |          |       |  |                 |         |
| cg08319130 | 6  | 100,038,353 | 0.0014   | 0.244 | 0.275 |          |       |  |                 |         |
| cg08419450 | 10 | 90,013,989  | 0.00023  | 0.244 | 0.204 |          |       |  |                 |         |
| cg22777433 | 14 | 100,784,665 | 0.027883 | 0.244 | 0.194 |          |       |  |                 |         |
| cg25782983 | 11 | 74,950,764  | 1.87E-12 | 0.244 | 0.238 |          |       |  |                 |         |
| cg05377162 | 1  | 185,286,996 | 0.001745 | 0.244 | 0.190 |          |       |  | <i>IVNS1ABP</i> | TSS1500 |
| cg27656459 | 12 | 116,796,562 | 5.09E-16 | 0.244 | 0.256 |          |       |  |                 |         |
| cg10996148 | 17 | 925,701     | 1.89E-16 | 0.244 | 0.229 |          |       |  | <i>ABR</i>      | Body    |
| cg13634242 | 5  | 60,921,891  | 0.032983 | 0.244 | 0.305 |          |       |  |                 |         |
| cg04754315 | 4  | 57,522,801  | 1.72E-05 | 0.244 | 0.242 |          |       |  | <i>HOPX</i>     | 5'UTR   |
| cg06108782 | 10 | 50,817,213  | 0.003742 | 0.244 | 0.261 |          |       |  | <i>SLC18A3</i>  | TSS1500 |
| cg19593490 | 6  | 29,943,188  | 1.26E-05 | 0.244 | 0.231 |          |       |  | <i>HCG9</i>     | Body    |
| cg03001305 | 17 | 40,439,492  | 9.32E-09 | 0.244 | 0.231 | 2.78E-13 | 0.121 |  | <i>STAT5A</i>   | TSS200  |
| cg11532433 | 2  | 24,735,298  | 2.49E-07 | 0.244 | 0.239 |          |       |  |                 |         |
| cg10447977 | 3  | 64,598,405  | 3.46E-07 | 0.244 | 0.272 |          |       |  | <i>ADAMTS9</i>  | Body    |
| cg16263152 | 1  | 183,287,819 | 0.003722 | 0.244 | 0.265 |          |       |  | <i>NMNAT2</i>   | Body    |

|            |    |             |          |       |       |          |       |     |                  |         |
|------------|----|-------------|----------|-------|-------|----------|-------|-----|------------------|---------|
| cg17861277 | 5  | 150,385,659 | 7.04E-12 | 0.244 | 0.231 |          |       |     |                  |         |
| cg14155416 | 18 | 6,414,330   | 0.001206 | 0.244 | 0.230 | 1.51E-13 | 0.158 |     | <i>L3MBTL4</i>   | 5'UTR   |
| cg11316887 | 10 | 29,924,694  | 0.005635 | 0.244 | 0.197 |          |       |     | <i>SVIL</i>      | TSS1500 |
| cg16401770 | 7  | 112,739,805 | 3.02E-06 | 0.244 | 0.240 |          |       |     |                  |         |
| cg24384918 | 7  | 43,153,950  | 0.000681 | 0.244 | 0.269 |          |       |     | <i>HECW1</i>     | 5'UTR   |
| cg15126544 | 2  | 171,678,954 | 0.004022 | 0.244 | 0.263 |          |       |     | <i>GAD1</i>      | Body    |
| cg06967828 | 10 | 73,723,753  | 0.000375 | 0.244 | 0.160 |          |       |     | <i>CHST3</i>     | TSS1500 |
| cg24516901 | 2  | 225,266,801 | 0.014623 | 0.244 | 0.283 | 1.35E-07 | 0.143 |     | <i>FAM124B</i>   | TSS200  |
| cg05316463 | 14 | 95,786,663  | 0.001641 | 0.244 | 0.210 |          |       |     | <i>CLMN</i>      | TSS1500 |
| cg05900140 | 12 | 6,560,162   | 0.046027 | 0.243 | 0.085 |          |       |     | <i>TAPBPL</i>    | TSS1500 |
| cg08488945 | 3  | 181,422,202 | 0.000176 | 0.243 | 0.264 |          |       |     | <i>SOX2OT</i>    | Body    |
| cg22336004 | 1  | 66,258,035  | 0.004203 | 0.243 | 0.222 |          |       |     | <i>PDE4B</i>     | TSS200  |
| cg09940188 | 17 | 1,686,671   | 0.014567 | 0.243 | 0.131 |          |       |     | <i>SMYD4</i>     | Body    |
| cg11702085 | 6  | 28,956,804  | 1.26E-05 | 0.243 | 0.244 |          |       |     |                  |         |
| cg15808426 | 19 | 57,154,302  | 0.00459  | 0.243 | 0.234 |          |       |     |                  |         |
| cg05374654 | 11 | 94,134,666  | 1.48E-05 | 0.243 | 0.180 |          |       |     | <i>GPR83</i>     | TSS200  |
| cg06103624 | 15 | 66,998,926  | 4.13E-39 | 0.243 | 0.232 |          |       |     | <i>SMAD6</i>     | Body    |
| cg18120446 | 4  | 13,531,076  | 0.00093  | 0.243 | 0.239 |          |       |     |                  |         |
| cg00711090 | 19 | 57,018,614  | 0.001932 | 0.243 | 0.213 |          |       |     | <i>ZNF471</i>    | TSS1500 |
| cg07130150 | 12 | 96,883,863  | 0.01411  | 0.243 | 0.059 |          |       |     |                  |         |
| cg26735846 | 10 | 124,894,943 | 6.51E-06 | 0.243 | 0.147 |          |       |     | <i>HMX3</i>      | TSS1500 |
| cg12926596 | 12 | 56,111,944  | 1.46E-12 | 0.243 | 0.252 |          |       | Yes | <i>BLOC1S1</i>   | Body    |
| cg12597472 | 11 | 69,339,188  | 0.00044  | 0.243 | 0.218 |          |       |     |                  |         |
| cg07496545 | 5  | 140,683,737 | 1.53E-10 | 0.243 | 0.255 |          |       |     | <i>SLC25A2</i>   | TSS200  |
| cg08070646 | 12 | 52,616,097  | 1.05E-10 | 0.243 | 0.252 |          |       |     | <i>LOC283404</i> | Body    |
| cg11319389 | 20 | 42,544,648  | 1.8E-05  | 0.243 | 0.242 | 5.83E-11 | 0.134 |     | <i>TOX2</i>      | TSS200  |
| cg15120732 | 6  | 73,330,106  | 0.00661  | 0.243 | 0.275 |          |       |     | <i>KCNQ5</i>     | TSS1500 |
| cg23655651 | 12 | 20,365,720  | 0.004717 | 0.243 | 0.326 |          |       |     |                  |         |
| cg25254074 | 6  | 41,607,326  | 3.28E-30 | 0.243 | 0.241 |          |       |     | <i>MDFI</i>      | Body    |
| cg02381853 | 5  | 33,321,127  | 5.06E-09 | 0.243 | 0.228 |          |       |     |                  |         |
| cg23542968 | 14 | 36,983,129  | 0.002048 | 0.243 | 0.251 |          |       |     | <i>SFTA3</i>     | TSS200  |
| cg06368184 | 21 | 38,069,416  | 0.006505 | 0.243 | 0.270 |          |       |     |                  |         |
| cg06878361 | 19 | 52,390,810  | 0.006927 | 0.243 | 0.219 |          |       |     | <i>ZNF577</i>    | Body    |
| cg11461670 | 8  | 22,454,935  | 2.2E-11  | 0.243 | 0.236 |          |       |     | <i>PDLIM2</i>    | 3'UTR   |

|            |    |             |          |       |       |  |  |     |                  |         |
|------------|----|-------------|----------|-------|-------|--|--|-----|------------------|---------|
| cg04854637 | 11 | 134,285,140 | 2.22E-10 | 0.243 | 0.230 |  |  |     |                  |         |
| cg01172640 | 15 | 53,096,035  | 0.006172 | 0.243 | 0.179 |  |  |     |                  |         |
| cg23033518 | 14 | 59,101,719  | 0.005111 | 0.243 | 0.200 |  |  |     |                  |         |
| cg25436886 | 3  | 127,056,972 | 0.000157 | 0.243 | 0.216 |  |  |     |                  |         |
| cg11813265 | 14 | 95,238,671  | 1.7E-06  | 0.243 | 0.243 |  |  |     |                  |         |
| cg22210157 | 3  | 46,853,986  | 0.004068 | 0.243 | 0.258 |  |  |     |                  |         |
| cg23262036 | 7  | 96,647,021  | 1.47E-08 | 0.243 | 0.248 |  |  |     |                  |         |
| cg01794103 | 15 | 78,342,494  | 0.008324 | 0.243 | 0.217 |  |  |     | <i>TBC1D2B</i>   | Body    |
| cg16255156 | 1  | 113,265,709 | 1.48E-23 | 0.243 | 0.227 |  |  |     | <i>FAM19A3</i>   | Body    |
| cg07436152 | 6  | 50,819,236  | 0.007002 | 0.243 | 0.244 |  |  |     |                  |         |
| cg24641186 | 6  | 50,804,147  | 0.000126 | 0.243 | 0.240 |  |  |     | <i>TFAP2B</i>    | Body    |
| cg03730249 | 1  | 42,692,013  | 4.63E-19 | 0.243 | 0.233 |  |  |     | <i>FOXJ3</i>     | Body    |
| cg15754594 | 2  | 106,184,688 | 6.59E-09 | 0.243 | 0.236 |  |  |     |                  |         |
| cg09427605 | 4  | 146,740,968 | 0.021729 | 0.243 | 0.319 |  |  |     | <i>ZNF827</i>    | Body    |
| cg09654300 | 3  | 42,132,991  | 7.87E-13 | 0.243 | 0.238 |  |  |     | <i>TRAK1</i>     | 1stExon |
| cg26212328 | 12 | 46,767,665  | 0.000106 | 0.243 | 0.235 |  |  |     | <i>SLC38A2</i>   | TSS1500 |
| cg03835609 | 5  | 140,753,418 | 0.025891 | 0.243 | 0.301 |  |  |     | <i>PCDHGA4</i>   | Body    |
| cg00985729 | 6  | 30,712,559  | 0.016794 | 0.243 | 0.238 |  |  |     | <i>IER3</i>      | TSS1500 |
| cg03762994 | 17 | 6,899,332   | 4.23E-06 | 0.243 | 0.192 |  |  |     | <i>ALOX12</i>    | TSS200  |
| cg09789768 | 1  | 119,524,323 | 4.27E-10 | 0.243 | 0.236 |  |  |     | <i>TBX15</i>     | 5'UTR   |
| cg11524235 | 1  | 33,351,587  | 4.19E-08 | 0.243 | 0.210 |  |  |     | <i>HPCA</i>      | TSS1500 |
| cg07308257 | 7  | 36,265,036  | 1.97E-15 | 0.243 | 0.239 |  |  |     | <i>EEPD1</i>     | Body    |
| cg15253816 | 17 | 66,255,259  | 0.000269 | 0.243 | 0.252 |  |  |     | <i>ARSG</i>      | TSS200  |
| cg08602500 | 7  | 157,996,648 | 7.09E-14 | 0.243 | 0.226 |  |  |     | <i>PTPRN2</i>    | Body    |
| cg15246590 | 19 | 48,983,600  | 4.86E-19 | 0.243 | 0.247 |  |  |     | <i>CYTH2</i>     | 3'UTR   |
| cg22175873 | 5  | 140,801,482 | 6.15E-05 | 0.243 | 0.233 |  |  |     | <i>PCDHGA4</i>   | Body    |
| cg12271487 | 6  | 109,266,451 | 0.000264 | 0.243 | 0.255 |  |  |     | <i>ARMC2</i>     | Body    |
| cg21211253 | 5  | 139,168,323 | 1.06E-09 | 0.243 | 0.240 |  |  |     |                  |         |
| cg01209635 | 19 | 3,607,269   | 1.28E-08 | 0.243 | 0.222 |  |  |     | <i>TBXA2R</i>    | TSS1500 |
| cg04619882 | 1  | 109,741,037 | 3.64E-05 | 0.243 | 0.345 |  |  |     | <i>KIAA1324</i>  | Body    |
| cg14819504 | 2  | 160,761,413 | 0.034352 | 0.243 | 0.218 |  |  |     | <i>LY75</i>      | TSS200  |
| cg03859090 | 11 | 69,522,216  | 2.93E-11 | 0.243 | 0.219 |  |  | Yes |                  |         |
| cg11173131 | 20 | 45,179,226  | 2.23E-14 | 0.243 | 0.240 |  |  |     | <i>C20orf123</i> | TSS200  |
| cg26697320 | 7  | 26,437,681  | 0.015932 | 0.243 | 0.151 |  |  |     |                  |         |

|            |    |             |          |       |       |  |  |  |                 |         |
|------------|----|-------------|----------|-------|-------|--|--|--|-----------------|---------|
| cg00401972 | 16 | 66,400,404  | 3.41E-07 | 0.243 | 0.203 |  |  |  | <i>CDH5</i>     | TSS200  |
| cg06820621 | 5  | 92,938,232  | 3.98E-14 | 0.243 | 0.233 |  |  |  |                 |         |
| cg06884718 | 6  | 32,191,821  | 4.31E-06 | 0.243 | 0.261 |  |  |  | <i>NOTCH4</i>   | 1stExon |
| cg18394340 | 5  | 134,735,613 | 0.000109 | 0.243 | 0.208 |  |  |  | <i>H2AFY</i>    | TSS1500 |
| cg14692854 | 2  | 97,198,126  | 9.51E-06 | 0.243 | 0.295 |  |  |  |                 |         |
| cg02818811 | 12 | 75,728,458  | 0.022893 | 0.243 | 0.211 |  |  |  | <i>GLIPR1L1</i> | TSS200  |
| cg24799460 | 15 | 102,251,213 | 4.95E-07 | 0.243 | 0.233 |  |  |  | <i>TARSL2</i>   | Body    |
| cg05178734 | 15 | 59,729,760  | 0.000468 | 0.243 | 0.247 |  |  |  | <i>FAM81A</i>   | TSS1500 |
| cg17125585 | 1  | 68,176,471  | 1.64E-10 | 0.243 | 0.234 |  |  |  | <i>GNG12</i>    | 5'UTR   |
| cg23426473 | 7  | 155,255,232 | 0.001544 | 0.243 | 0.261 |  |  |  | <i>EN2</i>      | Body    |
| cg13986840 | 7  | 130,132,453 | 3.62E-06 | 0.243 | 0.234 |  |  |  | <i>MEST</i>     | 5'UTR   |
| cg23876056 | 6  | 24,950,870  | 7.63E-14 | 0.243 | 0.244 |  |  |  |                 |         |
| cg00044796 | 1  | 146,552,390 | 3.6E-06  | 0.243 | 0.250 |  |  |  |                 |         |
| cg03217471 | 6  | 11,687,689  | 4.65E-24 | 0.243 | 0.237 |  |  |  |                 |         |
| cg15473017 | 1  | 166,853,615 | 0.010875 | 0.243 | 0.151 |  |  |  |                 |         |
| cg11718030 | 11 | 27,744,363  | 1.18E-05 | 0.243 | 0.254 |  |  |  | <i>BDNF</i>     | TSS1500 |
| cg02852327 | 7  | 121,950,975 | 1.81E-06 | 0.243 | 0.231 |  |  |  |                 |         |
| cg00765705 | 12 | 124,865,130 | 3.41E-16 | 0.243 | 0.237 |  |  |  | <i>NCOR2</i>    | Body    |
| cg02967969 | 11 | 66,443,874  | 1.76E-16 | 0.243 | 0.255 |  |  |  | <i>RBM4B</i>    | Body    |
| cg08671647 | 4  | 30,724,564  | 1.4E-07  | 0.243 | 0.241 |  |  |  | <i>PCDH7</i>    | 1stExon |
| cg22904737 | 17 | 36,735,245  | 5.42E-07 | 0.243 | 0.204 |  |  |  | <i>SRCIN1</i>   | Body    |
| cg18131141 | 1  | 36,043,002  | 3.47E-05 | 0.243 | 0.236 |  |  |  | <i>TFAP2E</i>   | Body    |
| cg20320575 | 14 | 24,458,099  | 3.51E-19 | 0.243 | 0.231 |  |  |  | <i>DHRS4L2</i>  | 5'UTR   |
| cg05783998 | 6  | 74,295,921  | 0.000948 | 0.243 | 0.240 |  |  |  |                 |         |
| cg18810664 | 10 | 31,074,367  | 0.021816 | 0.243 | 0.139 |  |  |  |                 |         |
| cg26554505 | 3  | 55,516,711  | 0.001792 | 0.243 | 0.180 |  |  |  | <i>WNT5A</i>    | Body    |
| cg03346415 | 16 | 69,854,895  | 1.5E-14  | 0.243 | 0.222 |  |  |  | <i>WWP2</i>     | Body    |
| cg07383092 | 5  | 172,663,058 | 0.000157 | 0.243 | 0.237 |  |  |  | <i>NKX2-5</i>   | TSS1500 |
| cg08660876 | 4  | 154,681,323 | 3.36E-05 | 0.243 | 0.220 |  |  |  | <i>RNF175</i>   | 5'UTR   |
| cg04268950 | 11 | 130,298,854 | 0.002113 | 0.243 | 0.254 |  |  |  | <i>ADAMTS8</i>  | TSS1500 |
| cg08693172 | 19 | 46,526,333  | 0.000605 | 0.243 | 0.169 |  |  |  | <i>PGLYRP1</i>  | TSS200  |
| cg17984022 | 14 | 105,156,566 | 0.002301 | 0.243 | 0.203 |  |  |  | <i>INF2</i>     | 5'UTR   |
| cg13198709 | 10 | 102,473,456 | 8.98E-05 | 0.243 | 0.250 |  |  |  |                 |         |
| cg17311074 | 15 | 71,507,695  | 1.44E-14 | 0.243 | 0.219 |  |  |  | <i>THSD4</i>    | Body    |



|            |    |             |          |       |       |          |       |  |                  |         |
|------------|----|-------------|----------|-------|-------|----------|-------|--|------------------|---------|
| cg07835844 | 2  | 45,879,684  | 0.045082 | 0.243 | 0.198 |          |       |  | <i>PRKCE</i>     | Body    |
| cg16553500 | 1  | 32,169,868  | 0.001444 | 0.243 | 0.241 |          |       |  | <i>COL16A1</i>   | TSS200  |
| cg19636519 | 7  | 99,541,626  | 1.29E-12 | 0.243 | 0.246 |          |       |  |                  |         |
| cg02448922 | 1  | 21,754,947  | 0.002791 | 0.243 | 0.223 |          |       |  |                  |         |
| cg03803008 | 7  | 70,055,327  | 3.95E-19 | 0.243 | 0.226 |          |       |  | <i>AUTS2</i>     | Body    |
| cg14037728 | 9  | 116,645,936 | 8.04E-07 | 0.243 | 0.284 |          |       |  | <i>ZNF618</i>    | Body    |
| cg11094122 | 20 | 35,579,338  | 0.023535 | 0.243 | 0.070 |          |       |  | <i>SAMHD1</i>    | Body    |
| cg00161225 | 17 | 3,814,785   | 8.48E-07 | 0.243 | 0.214 |          |       |  | <i>P2RX1</i>     | Body    |
| cg11770664 | 10 | 45,470,023  | 4.32E-17 | 0.243 | 0.192 |          |       |  | <i>RASSF4</i>    | Body    |
| cg12562076 | 6  | 137,808,930 | 3.76E-06 | 0.243 | 0.274 |          |       |  |                  |         |
| cg20873416 | 6  | 30,737,068  | 0.001661 | 0.243 | 0.291 |          |       |  |                  |         |
| cg24539517 | 10 | 121,161,258 | 1.75E-06 | 0.243 | 0.205 |          |       |  | <i>GRK5</i>      | Body    |
| cg16169604 | 2  | 131,485,486 | 0.000455 | 0.243 | 0.225 | 1.02E-14 | 0.113 |  | <i>GPR148</i>    | TSS1500 |
| cg12038696 | 1  | 36,043,352  | 3.05E-05 | 0.243 | 0.231 |          |       |  | <i>TFAP2E</i>    | Body    |
| cg12277495 | 16 | 66,462,184  | 3.49E-06 | 0.243 | 0.204 |          |       |  | <i>BEAN</i>      | 5'UTR   |
| cg13164537 | 18 | 67,624,071  | 2.77E-07 | 0.243 | 0.216 | 5.37E-16 | 0.182 |  | <i>CD226</i>     | 5'UTR   |
| cg17859448 | 1  | 101,703,749 | 0.005358 | 0.243 | 0.277 |          |       |  | <i>S1PR1</i>     | 5'UTR   |
| cg19230867 | 3  | 42,103,367  | 9.65E-10 | 0.243 | 0.271 |          |       |  |                  |         |
| cg24447042 | X  | 128,657,893 | 0.005259 | 0.243 | 0.159 | 8.08E-23 | 0.222 |  | <i>SMARCA1</i>   | TSS1500 |
| cg24500441 | 15 | 66,274,709  | 0.032492 | 0.243 | 0.198 |          |       |  | <i>MEGF11</i>    | Body    |
| cg04436554 | 5  | 172,669,976 | 0.000389 | 0.243 | 0.241 |          |       |  |                  |         |
| cg22698177 | 15 | 49,207,945  | 4.65E-05 | 0.243 | 0.245 |          |       |  | <i>SHC4</i>      | Body    |
| cg15542798 | 1  | 232,941,253 | 0.049813 | 0.243 | 0.178 |          |       |  | <i>KIAA1383</i>  | 1stExon |
| cg08971771 | 17 | 48,049,979  | 0.00021  | 0.243 | 0.175 |          |       |  | <i>DLX4</i>      | TSS200  |
| cg00014998 | 2  | 177,014,962 | 7.63E-12 | 0.243 | 0.205 |          |       |  | <i>HOXD4</i>     | TSS1500 |
| cg00048743 | 5  | 140,782,367 | 0.000327 | 0.243 | 0.275 |          |       |  | <i>PCDHGA4</i>   | Body    |
| cg11448896 | 1  | 50,889,182  | 0.00445  | 0.243 | 0.206 |          |       |  | <i>DMRTA2</i>    | TSS200  |
| cg12252069 | 7  | 26,897,597  | 8.58E-10 | 0.243 | 0.226 |          |       |  | <i>SKAP2</i>     | Body    |
| cg17161718 | 6  | 33,160,156  | 4.86E-06 | 0.243 | 0.173 |          |       |  | <i>COL11A2</i>   | 5'UTR   |
| cg07113230 | 1  | 8,277,394   | 0.024985 | 0.243 | 0.129 |          |       |  |                  |         |
| cg09153895 | 17 | 58,179,869  | 0.000126 | 0.243 | 0.231 |          |       |  | <i>LOC653653</i> | Body    |
| cg18985133 | 8  | 39,835,730  | 5.48E-10 | 0.243 | 0.163 |          |       |  | <i>IDO2</i>      | Body    |
| cg01624229 | 2  | 153,252,785 | 4.2E-20  | 0.243 | 0.254 |          |       |  | <i>FMNL2</i>     | Body    |
| cg24720355 | 1  | 119,526,255 | 5.12E-12 | 0.243 | 0.212 |          |       |  | <i>TBX15</i>     | 5'UTR   |

|            |    |             |          |       |       |          |       |     |                  |         |
|------------|----|-------------|----------|-------|-------|----------|-------|-----|------------------|---------|
| cg12379940 | 13 | 44,947,923  | 0.016715 | 0.243 | 0.250 |          |       |     | <i>SERP2</i>     | TSS200  |
| cg00574563 | 17 | 35,299,270  | 0.002058 | 0.243 | 0.223 |          |       |     | <i>LHX1</i>      | Body    |
| cg01880463 | 20 | 45,179,413  | 1.05E-11 | 0.243 | 0.236 |          |       |     | <i>C20orf123</i> | TSS1500 |
| cg18345219 | 1  | 43,919,084  | 9.22E-05 | 0.243 | 0.193 |          |       |     | <i>HYI</i>       | Body    |
| cg22382836 | 19 | 723,036     | 1.4E-06  | 0.243 | 0.263 |          |       |     | <i>PALM</i>      | Body    |
| cg27175093 | 14 | 57,265,910  | 0.006038 | 0.243 | 0.229 |          |       |     |                  |         |
| cg19223579 | 10 | 115,370,894 | 0.017247 | 0.243 | 0.243 |          |       |     | <i>NRAP</i>      | Body    |
| cg04180086 | 5  | 1,878,499   | 5.23E-08 | 0.243 | 0.239 |          |       |     | <i>IRX4</i>      | Body    |
| cg08546494 | 2  | 102,867,826 | 0.037444 | 0.243 | 0.175 |          |       |     |                  |         |
| cg20352178 | 15 | 69,099,262  | 8.79E-23 | 0.243 | 0.230 |          |       |     | <i>C15orf28</i>  | Body    |
| cg00128482 | 8  | 75,737,456  | 0.003133 | 0.243 | 0.303 |          |       |     | <i>PI15</i>      | 5'UTR   |
| cg01192554 | 11 | 70,228,615  | 0.000783 | 0.243 | 0.192 |          |       | Yes | <i>PPFIA1</i>    | 3'UTR   |
| cg02505749 | 8  | 140,715,735 | 0.000876 | 0.243 | 0.303 |          |       |     | <i>KCNK9</i>     | TSS1500 |
| cg03049691 | 17 | 27,039,032  | 8.09E-06 | 0.243 | 0.231 |          |       |     | <i>PROCA1</i>    | TSS200  |
| cg26632897 | 17 | 77,030,546  | 1.95E-07 | 0.243 | 0.192 |          |       |     | <i>C1QTNF1</i>   | 1stExon |
| cg00241281 | 14 | 105,779,794 | 5.39E-18 | 0.243 | 0.225 |          |       |     | <i>PACS2</i>     | TSS1500 |
| cg25301767 | 12 | 49,731,393  | 1.6E-12  | 0.243 | 0.215 |          |       |     | <i>C1QL4</i>     | TSS1500 |
| cg00305071 | 1  | 34,504,017  | 0.00176  | 0.243 | 0.231 |          |       |     | <i>CSMD2</i>     | Body    |
| cg04958794 | 14 | 97,685,274  | 0.000247 | 0.243 | 0.297 |          |       |     |                  |         |
| cg18952647 | 15 | 83,953,744  | 0.008044 | 0.243 | 0.207 | 3.35E-09 | 0.133 |     | <i>BNC1</i>      | TSS1500 |
| cg16224951 | 6  | 31,528,154  | 1.66E-13 | 0.243 | 0.229 |          |       |     |                  |         |
| cg01190692 | 12 | 106,976,711 | 0.008914 | 0.243 | 0.208 |          |       |     | <i>RFX4</i>      | TSS1500 |
| cg02567839 | 1  | 242,612,787 | 3.38E-08 | 0.243 | 0.237 |          |       |     | <i>PLD5</i>      | 5'UTR   |
| cg09567511 | 4  | 6,155,914   | 3.78E-22 | 0.243 | 0.232 |          |       |     | <i>JAKMIP1</i>   | 5'UTR   |
| cg15251385 | 12 | 8,025,582   | 3.11E-07 | 0.243 | 0.238 |          |       |     | <i>SLC2A14</i>   | TSS200  |
| cg16705744 | 3  | 27,756,039  | 0.003623 | 0.243 | 0.204 |          |       |     |                  |         |
| cg22537474 | 20 | 10,198,659  | 0.000447 | 0.243 | 0.222 |          |       |     | <i>SNAP25</i>    | TSS1500 |
| cg04561727 | 14 | 104,010,865 | 6.27E-08 | 0.243 | 0.251 |          |       | Yes |                  |         |
| cg14626309 | 4  | 299,051     | 0.008517 | 0.243 | 0.207 |          |       |     |                  |         |
| cg07812877 | 19 | 11,531,469  | 0.000766 | 0.243 | 0.260 |          |       |     | <i>RGL3</i>      | TSS1500 |
| cg11201710 | 3  | 192,232,468 | 0.002926 | 0.243 | 0.236 |          |       |     | <i>FGF12</i>     | Body    |
| cg11332519 | 12 | 26,348,093  | 9.51E-05 | 0.243 | 0.189 |          |       |     | <i>SSPN</i>      | TSS200  |
| cg25718035 | 10 | 8,085,029   | 1.98E-06 | 0.242 | 0.239 |          |       |     |                  |         |
| cg26102728 | 7  | 28,218,933  | 0.005655 | 0.242 | 0.224 |          |       |     | <i>JAZF1</i>     | Body    |

|            |    |             |          |       |       |          |       |     |               |         |
|------------|----|-------------|----------|-------|-------|----------|-------|-----|---------------|---------|
| cg12875241 | X  | 9,734,063   | 5.95E-19 | 0.242 | 0.236 |          |       |     | <i>GPR143</i> | TSS200  |
| cg24694743 | 1  | 32,088,013  | 1.73E-07 | 0.242 | 0.241 |          |       |     | <i>HCRTR1</i> | Body    |
| cg02432280 | 7  | 152,622,368 | 0.002539 | 0.242 | 0.248 |          |       |     |               |         |
| cg02940147 | 11 | 124,747,263 | 1E-22    | 0.242 | 0.227 |          |       |     | <i>ROBO3</i>  | Body    |
| cg17206850 | 11 | 62,693,456  | 3.63E-05 | 0.242 | 0.246 |          |       |     |               |         |
| cg08315174 | 14 | 36,990,430  | 0.000351 | 0.242 | 0.217 |          |       | Yes | <i>NKX2-1</i> | TSS1500 |
| cg05704955 | 16 | 70,759,914  | 2.16E-17 | 0.242 | 0.243 |          |       |     | <i>VAC14</i>  | Body    |
| cg13885965 | 6  | 30,712,409  | 0.031837 | 0.242 | 0.237 |          |       |     | <i>IER3</i>   | TSS200  |
| cg07690127 | 7  | 2,077,293   | 5.06E-10 | 0.242 | 0.235 |          |       |     | <i>MAD1L1</i> | Body    |
| cg09904497 | 18 | 76,737,834  | 0.000316 | 0.242 | 0.257 |          |       |     |               |         |
| cg23165310 | 3  | 181,422,217 | 3.43E-06 | 0.242 | 0.231 |          |       |     | <i>SOX2OT</i> | Body    |
| cg24897141 | 5  | 139,283,199 | 0.001343 | 0.242 | 0.279 |          |       |     | <i>NRG2</i>   | Body    |
| cg12510708 | 7  | 26,193,805  | 3.81E-11 | 0.242 | 0.219 |          |       |     | <i>NFE2L3</i> | Body    |
| cg17299899 | 18 | 76,738,478  | 0.023004 | 0.242 | 0.270 |          |       |     |               |         |
| cg21587238 | 5  | 42,953,590  | 0.0305   | 0.242 | 0.238 |          |       |     |               |         |
| cg22027433 | 17 | 62,208,049  | 2.96E-06 | 0.242 | 0.201 |          |       |     | <i>ERN1</i>   | TSS1500 |
| cg22085751 | 6  | 28,921,976  | 0.028643 | 0.242 | 0.217 |          |       |     |               |         |
| cg23702727 | 17 | 73,642,607  | 5.57E-05 | 0.242 | 0.189 |          |       |     | <i>RECQL5</i> | Body    |
| cg23694533 | 17 | 40,806,193  | 0.022855 | 0.242 | 0.146 |          |       |     |               |         |
| cg17580935 | 3  | 65,583,240  | 6.35E-08 | 0.242 | 0.252 |          |       |     | <i>MAGI1</i>  | Body    |
| cg21608192 | 16 | 17,563,827  | 0.012756 | 0.242 | 0.157 | 1.27E-12 | 0.120 |     | <i>XYLT1</i>  | Body    |
| cg12714665 | 11 | 15,739,896  | 1.46E-08 | 0.242 | 0.244 |          |       |     |               |         |
| cg14916079 | 10 | 120,788,696 | 0.000156 | 0.242 | 0.168 |          |       |     | <i>NANOS1</i> | TSS1500 |
| cg26326607 | 11 | 1,976,270   | 5.86E-22 | 0.242 | 0.240 |          |       |     | <i>MRPL23</i> | Body    |
| cg04224247 | X  | 9,984,515   | 0.024852 | 0.242 | 0.215 |          |       |     | <i>WWC3</i>   | 5'UTR   |
| cg22661893 | 11 | 89,224,559  | 0.01382  | 0.242 | 0.260 |          |       |     | <i>NOX4</i>   | 1stExon |
| cg24685006 | 1  | 36,043,014  | 2.07E-05 | 0.242 | 0.237 |          |       |     | <i>TFAP2E</i> | Body    |
| cg14653977 | 9  | 136,038,692 | 5.95E-11 | 0.242 | 0.228 |          |       |     | <i>GBGT1</i>  | 5'UTR   |
| cg18185665 | 17 | 16,257,111  | 0.000241 | 0.242 | 0.146 |          |       |     | <i>CENPV</i>  | TSS1500 |
| cg19513727 | 12 | 110,708,125 | 1.24E-07 | 0.242 | 0.191 |          |       |     |               |         |
| cg23122901 | 22 | 19,880,135  | 1.19E-06 | 0.242 | 0.235 |          |       |     | <i>TXNRD2</i> | Body    |
| cg25073700 | 7  | 157,628,207 | 1.4E-07  | 0.242 | 0.251 |          |       |     | <i>PTPRN2</i> | Body    |
| cg27564792 | 3  | 62,360,162  | 0.024617 | 0.242 | 0.316 |          |       |     | <i>FEZF2</i>  | TSS1500 |
| cg04767734 | 2  | 172,958,009 | 0.018707 | 0.242 | 0.258 |          |       |     |               |         |

|            |    |             |          |       |       |  |  |  |                  |         |
|------------|----|-------------|----------|-------|-------|--|--|--|------------------|---------|
| cg05377949 | 3  | 127,951,287 | 8.23E-14 | 0.242 | 0.240 |  |  |  | <i>EEFSEC</i>    | Body    |
| cg14035238 | 2  | 175,499,365 | 0.03454  | 0.242 | 0.210 |  |  |  | <i>WIPF1</i>     | 5'UTR   |
| cg15928347 | 2  | 64,837,018  | 1.64E-05 | 0.242 | 0.247 |  |  |  |                  |         |
| cg20971045 | 5  | 53,075,687  | 0.000368 | 0.242 | 0.245 |  |  |  |                  |         |
| cg04805181 | 15 | 66,914,759  | 0.044127 | 0.242 | 0.187 |  |  |  |                  |         |
| cg12569013 | 8  | 11,549,572  | 0.003521 | 0.242 | 0.180 |  |  |  |                  |         |
| cg16725984 | 16 | 89,735,184  | 1.09E-06 | 0.242 | 0.193 |  |  |  | <i>C16orf55</i>  | Body    |
| cg24946795 | 12 | 52,115,674  | 0.001539 | 0.242 | 0.272 |  |  |  | <i>SCN8A</i>     | Body    |
| cg04972759 | 5  | 180,596,634 | 0.004162 | 0.242 | 0.311 |  |  |  |                  |         |
| cg07830160 | 1  | 159,880,327 | 0.000117 | 0.242 | 0.227 |  |  |  |                  |         |
| cg10005224 | 12 | 54,424,964  | 7.42E-05 | 0.242 | 0.197 |  |  |  | <i>HOXC4</i>     | 5'UTR   |
| cg16265348 | 20 | 25,129,542  | 3.7E-06  | 0.242 | 0.224 |  |  |  | <i>LOC284798</i> | TSS1500 |
| cg11750133 | 10 | 93,647,217  | 0.022257 | 0.242 | 0.242 |  |  |  |                  |         |
| cg06394874 | 19 | 22,235,850  | 0.00296  | 0.242 | 0.312 |  |  |  | <i>ZNF257</i>    | Body    |
| cg05281603 | 11 | 111,384,124 | 3.68E-07 | 0.242 | 0.222 |  |  |  | <i>BTG4</i>      | TSS1500 |
| cg06979669 | 11 | 119,835,317 | 0.009755 | 0.242 | 0.232 |  |  |  |                  |         |
| cg03479065 | 3  | 134,124,988 | 1.38E-05 | 0.242 | 0.260 |  |  |  |                  |         |
| cg04157138 | 14 | 58,331,898  | 6.04E-06 | 0.242 | 0.195 |  |  |  |                  |         |
| cg09521719 | 2  | 237,416,370 | 0.000185 | 0.242 | 0.243 |  |  |  | <i>IQCA1</i>     | TSS1500 |
| cg14044388 | 9  | 94,579,826  | 3.12E-19 | 0.242 | 0.241 |  |  |  | <i>ROR2</i>      | Body    |
| cg03719428 | 12 | 54,376,094  | 6.14E-18 | 0.242 | 0.223 |  |  |  |                  |         |
| cg06553841 | 7  | 120,628,572 | 0.001467 | 0.242 | 0.171 |  |  |  | <i>C7orf58</i>   | TSS1500 |
| cg22581896 | 7  | 4,779,225   | 1E-11    | 0.242 | 0.216 |  |  |  | <i>FOXK1</i>     | Body    |
| cg24530246 | 3  | 53,118,167  | 3.04E-22 | 0.242 | 0.224 |  |  |  |                  |         |
| cg24838316 | 6  | 29,895,260  | 1.15E-07 | 0.242 | 0.191 |  |  |  |                  |         |
| cg24828683 | 6  | 29,856,210  | 0.016475 | 0.242 | 0.221 |  |  |  | <i>HLA-H</i>     | Body    |
| cg02614129 | 5  | 134,733,615 | 0.002682 | 0.242 | 0.227 |  |  |  | <i>H2AFY</i>     | 5'UTR   |
| cg20006618 | 4  | 186,652,454 | 6.16E-16 | 0.242 | 0.214 |  |  |  | <i>SORBS2</i>    | 5'UTR   |
| cg22258315 | 8  | 48,675,723  | 2.19E-06 | 0.242 | 0.177 |  |  |  |                  |         |
| cg01718116 | 2  | 115,919,829 | 0.015748 | 0.242 | 0.328 |  |  |  | <i>DPP10</i>     | Body    |
| cg24398450 | 12 | 109,029,099 | 1.08E-05 | 0.242 | 0.262 |  |  |  | <i>SELPLG</i>    | TSS1500 |
| cg23643375 | 17 | 45,933,306  | 0.011495 | 0.242 | 0.225 |  |  |  | <i>SP6</i>       | TSS200  |
| cg09092713 | X  | 119,133,965 | 0.043087 | 0.242 | 0.262 |  |  |  |                  |         |
| cg01574481 | 14 | 24,641,852  | 1.33E-17 | 0.242 | 0.231 |  |  |  | <i>REC8</i>      | Body    |

|            |    |             |          |       |       |            |       |  |         |         |
|------------|----|-------------|----------|-------|-------|------------|-------|--|---------|---------|
| cg04529406 | X  | 118,897,145 | 1.58E-05 | 0.242 | 0.267 |            |       |  |         |         |
| cg21274067 | 2  | 114,341,111 | 9.49E-05 | 0.242 | 0.158 |            |       |  | WASH2P  | TSS200  |
| cg01022219 | 18 | 13,641,735  | 3.98E-16 | 0.242 | 0.224 |            |       |  | C18orf1 | Body    |
| cg04125350 | 21 | 36,042,344  | 0.001156 | 0.242 | 0.221 |            |       |  | CLIC6   | 1stExon |
| cg20910490 | 14 | 37,117,947  | 0.000731 | 0.242 | 0.249 |            |       |  |         |         |
| cg25910261 | 7  | 157,405,965 | 5.94E-10 | 0.242 | 0.230 |            |       |  | PTPRN2  | Body    |
| cg26033466 | 7  | 96,644,782  | 0.034032 | 0.242 | 0.211 |            |       |  | DLX6AS  | TSS1500 |
| cg01295392 | 12 | 108,169,569 | 3.43E-07 | 0.242 | 0.234 |            |       |  | ASCL4   | 1stExon |
| cg18536148 | 17 | 59,533,844  | 1.19E-10 | 0.242 | 0.212 | 0.00879198 | 0.052 |  | TBX4    | 5'UTR   |
| cg00587115 | 7  | 47,621,025  | 2.57E-05 | 0.242 | 0.213 |            |       |  |         |         |
| cg06688989 | 6  | 41,606,869  | 0.012867 | 0.242 | 0.157 |            |       |  | MDF1    | Body    |
| cg08258582 | 1  | 48,058,985  | 0.001789 | 0.242 | 0.182 |            |       |  |         |         |
| cg05584361 | 11 | 1,481,525   | 3.63E-17 | 0.242 | 0.248 |            |       |  | BRSK2   | Body    |
| cg08560874 | 6  | 29,759,947  | 0.037905 | 0.242 | 0.269 |            |       |  | HCG4    | Body    |
| cg10158541 | 13 | 37,006,265  | 7.57E-06 | 0.242 | 0.206 |            |       |  | CCNA1   | 1stExon |
| cg16304656 | 7  | 641,337     | 2.76E-06 | 0.242 | 0.242 |            |       |  | PRKAR1B | Body    |
| cg11357670 | 13 | 114,143,948 | 0.003249 | 0.242 | 0.160 |            |       |  | DCUN1D2 | Body    |
| cg27348266 | 14 | 104,583,972 | 4.43E-09 | 0.242 | 0.193 |            |       |  |         |         |
| cg27358469 | 18 | 55,107,176  | 0.000661 | 0.242 | 0.284 |            |       |  | ONECUT2 | Body    |
| cg04406436 | 1  | 38,942,313  | 0.012933 | 0.242 | 0.257 |            |       |  |         |         |
| cg06549607 | 13 | 110,440,352 | 0.001822 | 0.242 | 0.170 |            |       |  | IRS2    | TSS1500 |
| cg17918501 | 2  | 27,717,709  | 0.022276 | 0.242 | 0.132 | 3.17E-12   | 0.106 |  | FNDC4   | 5'UTR   |
| cg07709148 | 8  | 29,387,238  | 0.000313 | 0.242 | 0.213 |            |       |  |         |         |
| cg07823492 | 17 | 46,608,099  | 6.57E-09 | 0.242 | 0.245 |            |       |  | HOXB1   | 1stExon |
| cg07941927 | 13 | 100,644,041 | 0.011348 | 0.242 | 0.238 |            |       |  |         |         |
| cg20092892 | 12 | 52,258,077  | 0.006017 | 0.242 | 0.260 |            |       |  |         |         |
| cg23981871 | 2  | 177,028,714 | 0.00587  | 0.242 | 0.238 |            |       |  | HOXD3   | TSS200  |
| cg26279550 | 12 | 66,582,805  | 0.03876  | 0.242 | 0.159 |            |       |  | IRAK3   | TSS200  |
| cg00849692 | 6  | 99,295,724  | 6.11E-06 | 0.242 | 0.168 |            |       |  |         |         |
| cg07355189 | 10 | 45,923,374  | 2.39E-11 | 0.242 | 0.256 |            |       |  | ALOX5   | Body    |
| cg00463767 | 2  | 63,282,043  | 1.76E-06 | 0.242 | 0.241 |            |       |  | OTX1    | Body    |
| cg03483632 | 11 | 35,639,276  | 3.66E-11 | 0.242 | 0.213 |            |       |  | FJX1    | TSS1500 |
| cg14480446 | 5  | 87,989,154  | 0.045812 | 0.242 | 0.249 |            |       |  |         |         |
| cg01106572 | 7  | 150,744,384 | 9.96E-29 | 0.242 | 0.231 |            |       |  | ACCN3   | TSS1500 |

|            |    |             |          |       |       |          |       |     |                     |         |
|------------|----|-------------|----------|-------|-------|----------|-------|-----|---------------------|---------|
| cg04234474 | 10 | 119,312,950 | 7.43E-07 | 0.242 | 0.239 |          |       |     |                     |         |
| cg14658867 | 20 | 443,632     | 0.001282 | 0.242 | 0.286 |          |       |     | <i>TBC1D20</i>      | TSS1500 |
| cg26661034 | 1  | 18,957,335  | 0.026355 | 0.242 | 0.291 |          |       |     | <i>PAX7</i>         | TSS200  |
| cg00646019 | 15 | 29,034,163  | 0.000992 | 0.242 | 0.263 |          |       |     |                     |         |
| cg08884571 | 19 | 45,901,453  | 0.000377 | 0.242 | 0.262 |          |       |     | <i>PPP1R13L</i>     | Body    |
| cg11920122 | 18 | 11,751,556  | 5.52E-07 | 0.242 | 0.236 |          |       |     | <i>GNAL</i>         | TSS200  |
| cg19233001 | 1  | 201,346,876 | 0.004686 | 0.242 | 0.288 |          |       |     | <i>TNNT2</i>        | TSS200  |
| cg06285727 | 11 | 72,524,028  | 4.58E-12 | 0.242 | 0.231 |          |       |     | <i>ATG16L2</i>      | TSS1500 |
| cg21252909 | X  | 30,326,328  | 0.000184 | 0.242 | 0.292 |          |       |     | <i>NROB1</i>        | 1stExon |
| cg24041541 | 8  | 77,586,395  | 0.002506 | 0.242 | 0.288 |          |       |     | <i>LOC100192378</i> | Body    |
| cg03239178 | 12 | 103,358,881 | 0.005342 | 0.242 | 0.269 |          |       |     |                     |         |
| cg04893741 | 8  | 142,692,382 | 0.002084 | 0.242 | 0.284 |          |       |     |                     |         |
| cg20491991 | 1  | 167,683,013 | 1.98E-06 | 0.242 | 0.243 |          |       |     |                     |         |
| cg22337605 | 1  | 12,227,417  | 0.008642 | 0.242 | 0.217 |          |       |     | <i>TNFRSF1B</i>     | Body    |
| cg21350860 | 2  | 173,080,153 | 4.41E-05 | 0.242 | 0.203 |          |       |     |                     |         |
| cg15681626 | 11 | 64,739,253  | 0.020296 | 0.242 | 0.209 |          |       |     |                     |         |
| cg19700787 | 6  | 3,997,547   | 2.1E-11  | 0.242 | 0.236 |          |       |     |                     |         |
| cg18099096 | 4  | 23,936,764  | 0.000792 | 0.242 | 0.265 |          |       |     |                     |         |
| cg14900471 | 8  | 11,561,620  | 0.002556 | 0.242 | 0.265 |          |       |     | <i>GATA4</i>        | TSS200  |
| cg08481464 | 10 | 77,871,618  | 4.06E-13 | 0.242 | 0.218 |          |       |     | <i>C10orf11</i>     | Body    |
| cg24475782 | 1  | 119,530,932 | 0.029984 | 0.242 | 0.208 |          |       |     | <i>TBX15</i>        | 5'UTR   |
| cg01956614 | 15 | 62,838,506  | 4.81E-11 | 0.242 | 0.245 |          |       |     |                     |         |
| cg10513852 | 12 | 81,109,337  | 1.25E-10 | 0.242 | 0.231 |          |       |     | <i>MYF5</i>         | TSS1500 |
| cg23341085 | 2  | 149,063,092 | 0.000207 | 0.242 | 0.193 |          |       |     |                     |         |
| cg20415053 | 1  | 26,527,928  | 4.41E-05 | 0.242 | 0.243 |          |       |     | <i>CATSPER4</i>     | Body    |
| cg23072383 | 22 | 31,031,044  | 9.94E-05 | 0.242 | 0.236 |          |       |     | <i>SLC35E4</i>      | TSS1500 |
| cg26185508 | 1  | 54,619,445  | 9.71E-14 | 0.242 | 0.185 |          |       |     | <i>CDCP2</i>        | TSS200  |
| cg00970313 | 14 | 37,125,914  | 5.39E-05 | 0.242 | 0.260 |          |       |     | <i>PAX9</i>         | TSS1500 |
| cg06085204 | 17 | 6,659,164   | 1.45E-05 | 0.242 | 0.196 |          |       |     | <i>XAF1</i>         | 5'UTR   |
| cg11008243 | 6  | 73,331,238  | 0.023863 | 0.242 | 0.319 |          |       |     | <i>KCNQ5</i>        | TSS1500 |
| cg08536841 | 19 | 49,250,452  | 3.96E-07 | 0.242 | 0.239 | 2.61E-13 | 0.164 |     | <i>IZUMO1</i>       | TSS1500 |
| cg19808620 | 1  | 153,514,442 | 0.001725 | 0.242 | 0.260 |          |       |     | <i>S100A5</i>       | TSS1500 |
| cg10881071 | 1  | 24,612,045  | 0.000277 | 0.242 | 0.225 |          |       | Yes |                     |         |
| cg12368542 | 13 | 50,570,250  | 0.00802  | 0.242 | 0.115 |          |       |     | <i>TRIM13</i>       | TSS1500 |

|            |    |             |          |       |       |  |  |  |              |         |
|------------|----|-------------|----------|-------|-------|--|--|--|--------------|---------|
| cg26575738 | 17 | 44,896,168  | 5.71E-05 | 0.242 | 0.277 |  |  |  | WNT3         | TSS200  |
| cg07458308 | 5  | 134,827,512 | 0.000943 | 0.242 | 0.184 |  |  |  |              |         |
| cg12892303 | 17 | 42,733,592  | 0.006051 | 0.242 | 0.263 |  |  |  | C17orf104    | TSS200  |
| cg25027832 | 2  | 176,948,544 | 2.14E-05 | 0.242 | 0.235 |  |  |  | EVX2         | 5'UTR   |
| cg06535308 | 11 | 17,497,693  | 2.73E-06 | 0.242 | 0.226 |  |  |  | ABCC8        | Body    |
| cg09853936 | 1  | 3,388,196   | 8.82E-15 | 0.242 | 0.236 |  |  |  | ARHGEF16     | Body    |
| cg25813936 | 9  | 36,276,879  | 5.34E-08 | 0.242 | 0.249 |  |  |  | GNE          | Body    |
| cg01408010 | 3  | 150,102,779 | 3.96E-06 | 0.242 | 0.232 |  |  |  |              |         |
| cg12463851 | 2  | 237,477,186 | 0.001814 | 0.242 | 0.138 |  |  |  | CXCR7        | TSS1500 |
| cg10424417 | 5  | 87,989,191  | 0.00055  | 0.242 | 0.258 |  |  |  |              |         |
| cg22370057 | 6  | 12,957,918  | 0.001363 | 0.242 | 0.216 |  |  |  | PHACTR1      | Body    |
| cg10814005 | 14 | 91,711,041  | 2.32E-05 | 0.242 | 0.209 |  |  |  | GPR68        | 5'UTR   |
| cg24889694 | 8  | 101,522,535 | 0.004793 | 0.242 | 0.127 |  |  |  |              |         |
| cg26487157 | 2  | 70,313,295  | 0.039708 | 0.242 | 0.271 |  |  |  | PCBP1        | TSS1500 |
| cg26057751 | 2  | 87,016,259  | 6.41E-09 | 0.242 | 0.237 |  |  |  | CD8A         | Body    |
| cg08875705 | 12 | 6,665,330   | 0.00026  | 0.242 | 0.243 |  |  |  | IFFO1        | TSS200  |
| cg00328965 | X  | 129,243,062 | 2.38E-09 | 0.242 | 0.229 |  |  |  | ELF4         | 5'UTR   |
| cg27203560 | 3  | 193,629,645 | 3.76E-09 | 0.242 | 0.241 |  |  |  |              |         |
| cg00821400 | 14 | 55,895,678  | 4.46E-12 | 0.242 | 0.254 |  |  |  | TBPL2        | Body    |
| cg25578028 | 17 | 7,905,704   | 1.77E-06 | 0.242 | 0.244 |  |  |  | GUCY2D       | TSS1500 |
| cg03744440 | 17 | 73,584,108  | 2.68E-05 | 0.242 | 0.235 |  |  |  | MYO15B       | TSS200  |
| cg07870999 | 7  | 155,260,895 | 9.3E-05  | 0.242 | 0.192 |  |  |  |              |         |
| cg07098902 | 2  | 17,720,407  | 0.015439 | 0.242 | 0.240 |  |  |  | VSNL1        | TSS1500 |
| cg27470373 | 2  | 64,836,764  | 0.000357 | 0.242 | 0.255 |  |  |  |              |         |
| cg01782024 | 1  | 91,989,267  | 6.98E-05 | 0.242 | 0.249 |  |  |  | CDC7         | Body    |
| cg04961582 | 14 | 95,239,464  | 8.98E-07 | 0.241 | 0.238 |  |  |  |              |         |
| cg12877039 | 5  | 140,857,192 | 1.16E-06 | 0.241 | 0.207 |  |  |  | PCDHGA4      | Body    |
| cg18257810 | 3  | 54,121,929  | 0.005805 | 0.241 | 0.309 |  |  |  |              |         |
| cg23847381 | 18 | 5,544,031   | 0.039282 | 0.241 | 0.350 |  |  |  | EPB41L3      | TSS200  |
| cg05812089 | 11 | 19,736,648  | 6.99E-05 | 0.241 | 0.203 |  |  |  | LOC100126784 | TSS1500 |
| cg13732857 | 2  | 45,029,729  | 0.014287 | 0.241 | 0.195 |  |  |  |              |         |
| cg19031085 | 5  | 135,228,288 | 2.24E-14 | 0.241 | 0.243 |  |  |  | IL9          | Body    |
| cg21163960 | 11 | 35,441,777  | 1.44E-05 | 0.241 | 0.251 |  |  |  | SLC1A2       | TSS1500 |
| cg04506114 | 1  | 179,322,762 | 2.94E-14 | 0.241 | 0.236 |  |  |  | SOAT1        | Body    |

|            |    |             |          |       |       |  |  |  |                       |         |
|------------|----|-------------|----------|-------|-------|--|--|--|-----------------------|---------|
| cg13072717 | 3  | 186,743,989 | 5.24E-05 | 0.241 | 0.190 |  |  |  | <i>ST6GAL1</i>        | 5'UTR   |
| cg16820186 | 11 | 17,373,103  | 0.035442 | 0.241 | 0.043 |  |  |  | <i>DKFZp686O24166</i> | TSS1500 |
| cg13416381 | 17 | 46,090,231  | 3.64E-09 | 0.241 | 0.200 |  |  |  |                       |         |
| cg04902729 | 1  | 181,452,707 | 0.004991 | 0.241 | 0.234 |  |  |  | <i>CACNA1E</i>        | TSS200  |
| cg06772309 | 1  | 17,571,896  | 3.3E-07  | 0.241 | 0.225 |  |  |  | <i>PADI1</i>          | 3'UTR   |
| cg11155356 | 8  | 134,114,892 | 3.53E-12 | 0.241 | 0.220 |  |  |  | <i>TG</i>             | Body    |
| cg06583412 | X  | 102,001,318 | 0.029872 | 0.241 | 0.096 |  |  |  | <i>BHLHB9</i>         | 5'UTR   |
| cg05965392 | 8  | 53,478,624  | 0.016586 | 0.241 | 0.210 |  |  |  | <i>FAM150A</i>        | TSS1500 |
| cg15802091 | 14 | 65,009,101  | 0.000127 | 0.241 | 0.231 |  |  |  | <i>HSPA2</i>          | 1stExon |
| cg01710189 | 8  | 22,454,888  | 2.67E-09 | 0.241 | 0.241 |  |  |  | <i>PDLIM2</i>         | 3'UTR   |
| cg25020286 | 1  | 18,956,947  | 2.25E-05 | 0.241 | 0.218 |  |  |  | <i>PAX7</i>           | TSS1500 |
| cg02017534 | 13 | 46,425,999  | 0.001603 | 0.241 | 0.206 |  |  |  | <i>SIAH3</i>          | TSS200  |
| cg02516134 | 7  | 134,575,187 | 5.5E-09  | 0.241 | 0.269 |  |  |  | <i>CALD1</i>          | TSS1500 |
| cg24848035 | 8  | 101,118,525 | 8.78E-06 | 0.241 | 0.286 |  |  |  | <i>RGS22</i>          | TSS200  |
| cg04308769 | 1  | 200,007,623 | 1.12E-08 | 0.241 | 0.218 |  |  |  | <i>NR5A2</i>          | Body    |
| cg08000684 | 19 | 11,530,025  | 0.000857 | 0.241 | 0.229 |  |  |  | <i>RGL3</i>           | TSS200  |
| cg24416660 | 17 | 73,865,998  | 4.98E-21 | 0.241 | 0.244 |  |  |  |                       |         |
| cg10002860 | 11 | 1,482,176   | 0.000164 | 0.241 | 0.244 |  |  |  | <i>BRSK2</i>          | Body    |
| cg27423669 | 13 | 97,766,320  | 4.32E-07 | 0.241 | 0.205 |  |  |  |                       |         |
| cg23415995 | 4  | 128,704,651 | 0.015759 | 0.241 | 0.258 |  |  |  | <i>HSPA4L</i>         | Body    |
| cg01804925 | 6  | 27,107,588  | 7.23E-06 | 0.241 | 0.257 |  |  |  | <i>HIST1H2BK</i>      | 3'UTR   |
| cg09872737 | 6  | 32,076,270  | 1.37E-06 | 0.241 | 0.268 |  |  |  | <i>TNXB</i>           | 5'UTR   |
| cg14727777 | 4  | 140,201,652 | 2.82E-05 | 0.241 | 0.212 |  |  |  | <i>C4orf49</i>        | TSS200  |
| cg17920936 | 9  | 94,710,553  | 1.49E-06 | 0.241 | 0.191 |  |  |  | <i>ROR2</i>           | Body    |
| cg03526459 | 1  | 146,549,940 | 1.38E-10 | 0.241 | 0.254 |  |  |  |                       |         |
| cg23490638 | 6  | 28,557,467  | 0.001063 | 0.241 | 0.194 |  |  |  |                       |         |
| cg26187308 | 8  | 70,947,440  | 0.000108 | 0.241 | 0.224 |  |  |  |                       |         |
| cg01294808 | 5  | 3,599,686   | 5.15E-14 | 0.241 | 0.224 |  |  |  | <i>IRX1</i>           | Body    |
| cg08624472 | 7  | 98,971,852  | 0.007726 | 0.241 | 0.191 |  |  |  | <i>ARPC1B</i>         | TSS1500 |
| cg08044097 | 8  | 55,371,013  | 5.01E-05 | 0.241 | 0.320 |  |  |  | <i>SOX17</i>          | Body    |
| cg09832911 | 10 | 45,923,678  | 2.99E-09 | 0.241 | 0.254 |  |  |  | <i>ALOX5</i>          | Body    |
| cg00752099 | 4  | 94,748,619  | 5.71E-07 | 0.241 | 0.241 |  |  |  | <i>ATOH1</i>          | TSS1500 |
| cg04937144 | 17 | 46,832,631  | 3.26E-06 | 0.241 | 0.233 |  |  |  |                       |         |
| cg13521842 | 14 | 101,036,202 | 1.13E-08 | 0.241 | 0.233 |  |  |  | <i>BEGAIN</i>         | TSS200  |



|            |    |             |          |       |       |          |       |     |                 |         |
|------------|----|-------------|----------|-------|-------|----------|-------|-----|-----------------|---------|
| cg19995654 | 12 | 66,628,777  | 0.000431 | 0.241 | 0.209 |          |       |     | <i>IRAK3</i>    | Body    |
| cg04027328 | 1  | 11,372,138  | 1.3E-15  | 0.241 | 0.216 |          |       |     |                 |         |
| cg04365481 | 1  | 17,086,061  | 1.96E-05 | 0.241 | 0.209 |          |       |     | <i>MST1P9</i>   | Body    |
| cg14397893 | 2  | 23,777,302  | 3.9E-15  | 0.241 | 0.226 |          |       |     | <i>KLHL29</i>   | 5'UTR   |
| cg06445944 | 5  | 67,586,928  | 0.01906  | 0.241 | 0.139 |          |       |     | <i>PIK3R1</i>   | Body    |
| cg09808235 | 1  | 2,542,588   | 0.000304 | 0.241 | 0.215 |          |       |     | <i>MMEL1</i>    | Body    |
| cg24158160 | 1  | 151,693,222 | 1.19E-05 | 0.241 | 0.208 |          |       |     | <i>C1orf230</i> | TSS1500 |
| cg13943217 | 9  | 133,542,125 | 0.029291 | 0.241 | 0.233 |          |       |     | <i>PRDM12</i>   | Body    |
| cg16086559 | 15 | 96,911,531  | 0.002581 | 0.241 | 0.216 |          |       |     |                 |         |
| cg10427430 | 11 | 12,783,675  | 4.59E-13 | 0.241 | 0.221 |          |       |     | <i>TEAD1</i>    | 5'UTR   |
| cg11384924 | 6  | 33,160,224  | 4.41E-06 | 0.241 | 0.241 |          |       |     | <i>COL11A2</i>  | 5'UTR   |
| cg17817168 | 12 | 22,486,454  | 3.64E-05 | 0.241 | 0.216 |          |       |     | <i>ST8SIA1</i>  | Body    |
| cg23462514 | 4  | 1,107,585   | 0.048379 | 0.241 | 0.158 |          |       |     | <i>RNF212</i>   | TSS200  |
| cg26595520 | 7  | 127,671,033 | 0.011484 | 0.241 | 0.174 |          |       |     | <i>LRRC4</i>    | TSS200  |
| cg13233461 | 12 | 54,350,209  | 0.023056 | 0.241 | 0.229 |          |       |     | <i>HOXC12</i>   | Body    |
| cg19657174 | 22 | 19,746,268  | 2.55E-07 | 0.241 | 0.230 |          |       |     | <i>TBX1</i>     | 5'UTR   |
| cg24955592 | 6  | 26,271,227  | 4.4E-05  | 0.241 | 0.248 |          |       |     | <i>HIST1H3G</i> | 1stExon |
| cg12198334 | 11 | 70,692,032  | 1.54E-05 | 0.241 | 0.210 |          |       | Yes | <i>SHANK2</i>   | Body    |
| cg08969855 | 16 | 23,417,536  | 1.47E-30 | 0.241 | 0.240 |          |       |     | <i>COG7</i>     | Body    |
| cg23004527 | 19 | 3,390,353   | 8.61E-08 | 0.241 | 0.232 |          |       |     | <i>NFIC</i>     | Body    |
| cg18038207 | 12 | 80,581,062  | 0.000288 | 0.241 | 0.246 |          |       |     |                 |         |
| cg26590744 | 2  | 177,017,389 | 3.22E-05 | 0.241 | 0.205 |          |       |     | <i>HOXD4</i>    | Body    |
| cg02874569 | 6  | 5,851,436   | 0.01556  | 0.241 | 0.086 |          |       |     |                 |         |
| cg12244647 | 22 | 50,737,978  | 5.25E-17 | 0.241 | 0.260 |          |       |     | <i>PLXNB2</i>   | 5'UTR   |
| cg16257051 | 5  | 153,862,183 | 0.027635 | 0.241 | 0.304 |          |       |     |                 |         |
| cg10231675 | 12 | 2,944,493   | 2.14E-07 | 0.241 | 0.171 |          |       |     | <i>NRIP2</i>    | TSS1500 |
| cg12593812 | 3  | 51,990,638  | 0.00267  | 0.241 | 0.242 |          |       |     | <i>GPR62</i>    | 1stExon |
| cg18297736 | 4  | 85,416,865  | 0.015396 | 0.241 | 0.291 |          |       |     | <i>NKX6-1</i>   | Body    |
| cg01315572 | 10 | 116,391,550 | 1.7E-07  | 0.241 | 0.246 |          |       |     | <i>ABLIM1</i>   | Body    |
| cg04025964 | 1  | 200,010,788 | 0.010833 | 0.241 | 0.290 |          |       |     | <i>NR5A2</i>    | Body    |
| cg21529533 | 6  | 29,796,015  | 0.010522 | 0.241 | 0.271 | 9.29E-13 | 0.203 |     | <i>HLA-G</i>    | Body    |
| cg12856183 | 15 | 89,953,033  | 1.42E-05 | 0.241 | 0.217 |          |       |     |                 |         |
| cg22431992 | 8  | 30,244,571  | 0.002423 | 0.241 | 0.214 |          |       |     | <i>RBPMS</i>    | Body    |
| cg18797653 | 5  | 135,416,613 | 0.002607 | 0.241 | 0.237 |          |       |     | <i>MIR886</i>   | TSS1500 |

|            |    |             |          |       |       |          |       |     |          |         |
|------------|----|-------------|----------|-------|-------|----------|-------|-----|----------|---------|
| cg08347042 | 19 | 45,579,378  | 0.021848 | 0.241 | 0.271 |          |       |     | ZNF296   | 1stExon |
| cg06549238 | 11 | 93,277,161  | 2.03E-05 | 0.241 | 0.185 |          |       | Yes | C11orf75 | TSS1500 |
| cg12710899 | 14 | 57,261,702  | 0.015235 | 0.241 | 0.238 |          |       |     |          |         |
| cg03945800 | 16 | 4,165,515   | 2.62E-08 | 0.241 | 0.197 | 1.43E-23 | 0.219 |     | ADCY9    | 5'UTR   |
| cg01115857 | 14 | 73,695,018  | 1.41E-07 | 0.241 | 0.230 |          |       |     |          |         |
| cg12350474 | 17 | 46,578,476  | 2.24E-17 | 0.241 | 0.216 |          |       |     |          |         |
| cg15617155 | 1  | 63,785,321  | 0.012664 | 0.241 | 0.308 |          |       |     |          |         |
| cg15921876 | 3  | 133,393,656 | 0.000443 | 0.241 | 0.217 |          |       |     |          |         |
| cg00674004 | 10 | 101,280,750 | 4.09E-06 | 0.241 | 0.247 |          |       |     |          |         |
| cg04508701 | 6  | 137,813,878 | 8.02E-05 | 0.241 | 0.218 |          |       |     | OLIG3    | 1stExon |
| cg25986200 | 2  | 131,010,423 | 1.43E-07 | 0.241 | 0.203 |          |       |     |          |         |
| cg14261272 | 2  | 127,976,400 | 0.010911 | 0.241 | 0.322 |          |       |     |          |         |
| cg00351472 | 9  | 97,846,551  | 2.54E-12 | 0.241 | 0.234 |          |       |     | MIR23B   | TSS1500 |
| cg00636527 | 5  | 176,859,356 | 1.11E-08 | 0.241 | 0.225 |          |       |     | GRK6     | Body    |
| cg20154618 | 19 | 4,153,677   | 0.005638 | 0.241 | 0.255 |          |       |     | CREB3L3  | 1stExon |
| cg25409809 | 15 | 22,920,168  | 6.32E-10 | 0.241 | 0.212 |          |       |     | CYFIP1   | 5'UTR   |
| cg01288372 | 2  | 209,271,383 | 0.020236 | 0.241 | 0.228 |          |       |     | PTH2R    | TSS200  |
| cg03957109 | 15 | 60,654,693  | 0.000124 | 0.241 | 0.218 |          |       |     | ANXA2    | Body    |
| cg03801871 | 2  | 30,453,395  | 4.68E-06 | 0.241 | 0.231 |          |       |     | LBH      | TSS1500 |
| cg09797337 | 13 | 112,709,538 | 0.001352 | 0.241 | 0.247 |          |       |     |          |         |
| cg10501360 | 10 | 49,671,665  | 1.11E-13 | 0.241 | 0.228 |          |       |     | ARHGAP22 | Body    |
| cg14260169 | 10 | 72,344,881  | 1.84E-05 | 0.241 | 0.266 |          |       |     |          |         |
| cg20457051 | 6  | 47,668,044  | 1.76E-07 | 0.241 | 0.251 |          |       |     | GPR115   | 5'UTR   |
| cg11192416 | 1  | 231,296,968 | 0.002401 | 0.241 | 0.260 |          |       |     |          |         |
| cg15664152 | 7  | 129,008,407 | 2.32E-09 | 0.241 | 0.240 |          |       |     | AHCYL2   | Body    |
| cg22328396 | 4  | 6,116,698   | 6.11E-06 | 0.241 | 0.219 |          |       |     | JAKMIP1  | 5'UTR   |
| cg03167763 | 1  | 20,512,397  | 2.21E-07 | 0.241 | 0.211 | 2.33E-09 | 0.114 |     | UBXN10   | TSS200  |
| cg06570476 | 19 | 33,764,439  | 4.37E-10 | 0.241 | 0.228 |          |       |     |          |         |
| cg15833843 | 17 | 53,341,243  | 0.000188 | 0.241 | 0.224 |          |       |     | HLF      | TSS1500 |
| cg23662097 | 3  | 4,873,008   | 3.67E-06 | 0.241 | 0.202 |          |       |     | ITPR1    | Body    |
| cg12308279 | 11 | 8,731,033   | 1.15E-14 | 0.241 | 0.224 |          |       |     | ST5      | Body    |
| cg22750254 | 10 | 13,043,421  | 0.025356 | 0.241 | 0.288 | 1.28E-19 | 0.245 |     | CCDC3    | 1stExon |
| cg06245037 | 11 | 44,332,938  | 0.018835 | 0.241 | 0.279 |          |       |     | ALX4     | TSS1500 |
| cg01452847 | 17 | 46,711,341  | 0.000655 | 0.241 | 0.167 |          |       |     | MIR196A1 | TSS1500 |

|            |    |             |          |       |       |          |       |     |                  |         |
|------------|----|-------------|----------|-------|-------|----------|-------|-----|------------------|---------|
| cg01981252 | 6  | 150,286,646 | 0.00642  | 0.241 | 0.216 |          |       |     | <i>ULBP1</i>     | Body    |
| cg05782445 | 2  | 26,915,207  | 8.98E-05 | 0.241 | 0.170 |          |       |     | <i>KCNK3</i>     | TSS1500 |
| cg20038493 | 14 | 24,809,226  | 2.52E-05 | 0.241 | 0.206 |          |       |     | <i>RIPK3</i>     | 5'UTR   |
| cg04922681 | 13 | 43,149,234  | 0.030579 | 0.241 | 0.316 |          |       |     | <i>TNFSF11</i>   | Body    |
| cg06533244 | 6  | 27,258,460  | 0.032716 | 0.241 | 0.267 |          |       |     |                  |         |
| cg12904904 | 5  | 155,754,151 | 0.001547 | 0.241 | 0.199 |          |       |     | <i>SGCD</i>      | 1stExon |
| cg18454863 | 9  | 70,972,325  | 1.9E-07  | 0.241 | 0.242 |          |       |     | <i>LOC572558</i> | Body    |
| cg07271302 | 6  | 114,177,535 | 0.012241 | 0.241 | 0.190 |          |       |     | <i>MARCKS</i>    | TSS1500 |
| cg18596947 | 14 | 94,393,816  | 4.39E-09 | 0.241 | 0.244 |          |       |     | <i>FAM181A</i>   | Body    |
| cg14923652 | 18 | 12,277,384  | 0.000163 | 0.241 | 0.253 |          |       |     | <i>CIDEA</i>     | 3'UTR   |
| cg00528902 | 8  | 9,760,528   | 0.00053  | 0.241 | 0.226 |          |       |     | <i>LOC157627</i> | Body    |
| cg05609218 | 10 | 15,760,947  | 5.83E-05 | 0.241 | 0.229 |          |       | Yes | <i>ITGA8</i>     | Body    |
| cg09313482 | 8  | 120,685,317 | 4.93E-06 | 0.241 | 0.279 |          |       |     |                  |         |
| cg00398130 | 8  | 80,525,764  | 0.014117 | 0.241 | 0.201 |          |       |     | <i>STMN2</i>     | Body    |
| cg05260469 | 8  | 62,621,327  | 3.91E-07 | 0.241 | 0.253 |          |       |     | <i>ASPH</i>      | Body    |
| cg13952840 | 9  | 136,114,300 | 0.001268 | 0.241 | 0.232 |          |       |     |                  |         |
| cg17301223 | 8  | 145,106,438 | 2.05E-05 | 0.241 | 0.259 |          |       |     | <i>OPLAH</i>     | Body    |
| cg23424043 | 7  | 138,795,004 | 3.76E-08 | 0.241 | 0.185 |          |       |     | <i>ZC3HAV1</i>   | TSS1500 |
| cg08867471 | 5  | 56,738,244  | 2.12E-17 | 0.241 | 0.210 |          |       |     |                  |         |
| cg16634404 | 6  | 33,161,438  | 2.59E-19 | 0.241 | 0.226 |          |       |     | <i>COL11A2</i>   | TSS1500 |
| cg21897034 | 3  | 38,567,652  | 2.22E-05 | 0.241 | 0.286 |          |       |     | <i>EXOG</i>      | 3'UTR   |
| cg23705098 | 7  | 1,289,853   | 4.24E-07 | 0.241 | 0.215 |          |       |     |                  |         |
| cg24759821 | 12 | 103,311,462 | 0.006656 | 0.241 | 0.092 | 7.17E-13 | 0.175 |     | <i>PAH</i>       | TSS200  |
| cg25911551 | 4  | 144,266,241 | 3.68E-10 | 0.241 | 0.258 |          |       |     | <i>GAB1</i>      | Body    |
| cg00517532 | 6  | 3,232,025   | 0.036545 | 0.241 | 0.198 |          |       |     |                  |         |
| cg12891160 | 2  | 119,916,686 | 0.00313  | 0.241 | 0.252 |          |       |     | <i>C1QL2</i>     | TSS1500 |
| cg22374525 | 1  | 116,370,764 | 1.11E-08 | 0.241 | 0.225 |          |       |     |                  |         |
| cg25718383 | 7  | 130,020,096 | 4.21E-06 | 0.241 | 0.273 |          |       |     | <i>CPA1</i>      | TSS200  |
| cg16754364 | 16 | 29,677,969  | 0.018687 | 0.241 | 0.266 |          |       |     | <i>SPN</i>       | 3'UTR   |
| cg01402735 | 1  | 79,472,558  | 3.48E-06 | 0.241 | 0.213 |          |       |     | <i>ELTD1</i>     | TSS200  |
| cg12110327 | 10 | 38,264,581  | 3.24E-07 | 0.241 | 0.193 |          |       |     | <i>ZNF25</i>     | 5'UTR   |
| cg15469272 | 1  | 91,189,314  | 0.009297 | 0.241 | 0.271 |          |       |     |                  |         |
| cg21692450 | 1  | 46,940,325  | 1.49E-08 | 0.241 | 0.222 |          |       |     |                  |         |
| cg26740494 | 1  | 1,567,131   | 1.71E-11 | 0.241 | 0.238 |          |       |     | <i>MMP23A</i>    | TSS1500 |

|            |    |             |          |       |       |  |  |  |                |         |
|------------|----|-------------|----------|-------|-------|--|--|--|----------------|---------|
| cg08605656 | X  | 73,642,885  | 4.71E-22 | 0.241 | 0.234 |  |  |  | <i>SLC16A2</i> | Body    |
| cg18026631 | 8  | 23,584,746  | 0.001069 | 0.241 | 0.206 |  |  |  |                |         |
| cg16470716 | 6  | 28,956,719  | 9.09E-07 | 0.241 | 0.226 |  |  |  |                |         |
| cg22489510 | 2  | 8,675,599   | 1.31E-14 | 0.241 | 0.226 |  |  |  |                |         |
| cg18424072 | 20 | 39,656,880  | 0.002574 | 0.240 | 0.185 |  |  |  | <i>TOP1</i>    | TSS1500 |
| cg26889659 | 6  | 684,090     | 1.22E-13 | 0.240 | 0.235 |  |  |  | <i>EXOC2</i>   | 5'UTR   |
| cg13031251 | 5  | 77,268,734  | 0.009309 | 0.240 | 0.221 |  |  |  |                |         |
| cg05370101 | 2  | 43,188,839  | 8.31E-06 | 0.240 | 0.263 |  |  |  |                |         |
| cg05758861 | 8  | 143,580,823 | 0.026165 | 0.240 | 0.362 |  |  |  | <i>BAI1</i>    | Body    |
| cg22244192 | 6  | 33,943,837  | 1.15E-06 | 0.240 | 0.229 |  |  |  |                |         |
| cg05266321 | 3  | 46,401,927  | 1.19E-07 | 0.240 | 0.178 |  |  |  | <i>CCR2</i>    | 3'UTR   |
| cg07441518 | 11 | 31,846,849  | 4.47E-05 | 0.240 | 0.269 |  |  |  |                |         |
| cg15999311 | 14 | 65,749,247  | 2.42E-08 | 0.240 | 0.244 |  |  |  |                |         |
| cg20256245 | 22 | 29,877,285  | 0.000322 | 0.240 | 0.232 |  |  |  | <i>NEFH</i>    | Body    |
| cg00133857 | 17 | 15,317,624  | 2.05E-20 | 0.240 | 0.216 |  |  |  |                |         |
| cg14651446 | 6  | 28,574,571  | 0.012284 | 0.240 | 0.288 |  |  |  |                |         |
| cg04922566 | 3  | 57,198,244  | 5.56E-10 | 0.240 | 0.222 |  |  |  | <i>IL17RD</i>  | Body    |
| cg17387577 | 12 | 124,864,657 | 2.77E-16 | 0.240 | 0.274 |  |  |  | <i>NCOR2</i>   | Body    |
| cg19238380 | 1  | 156,093,948 | 8.38E-12 | 0.240 | 0.282 |  |  |  | <i>LMNA</i>    | Body    |
| cg25493589 | 3  | 42,307,193  | 2.13E-08 | 0.240 | 0.252 |  |  |  | <i>CCK</i>     | TSS1500 |
| cg01821923 | 5  | 134,914,371 | 5.48E-05 | 0.240 | 0.220 |  |  |  | <i>CXCL14</i>  | Body    |
| cg05778494 | 1  | 155,165,346 | 3.74E-05 | 0.240 | 0.141 |  |  |  |                |         |
| cg07007118 | 2  | 237,477,262 | 0.001127 | 0.240 | 0.133 |  |  |  | <i>CXCR7</i>   | TSS1500 |
| cg10095777 | 6  | 31,734,292  | 2.29E-06 | 0.240 | 0.231 |  |  |  | <i>C6orf27</i> | Body    |
| cg11212451 | 5  | 173,198,508 | 0.004497 | 0.240 | 0.170 |  |  |  |                |         |
| cg11353598 | 15 | 70,740,451  | 7.18E-14 | 0.240 | 0.225 |  |  |  |                |         |
| cg11980129 | 3  | 79,815,639  | 0.000268 | 0.240 | 0.189 |  |  |  | <i>ROBO1</i>   | 5'UTR   |
| cg01724917 | 16 | 17,563,028  | 6.01E-14 | 0.240 | 0.238 |  |  |  | <i>XYLT1</i>   | Body    |
| cg06902607 | 1  | 247,511,400 | 7.04E-08 | 0.240 | 0.191 |  |  |  |                |         |
| cg15321401 | 6  | 166,884,430 | 9.76E-14 | 0.240 | 0.208 |  |  |  | <i>RPS6KA2</i> | Body    |
| cg19597529 | 3  | 122,399,230 | 2.48E-06 | 0.240 | 0.166 |  |  |  | <i>PARP14</i>  | TSS1500 |
| cg01843768 | 7  | 2,078,650   | 1.4E-16  | 0.240 | 0.201 |  |  |  | <i>MAD1L1</i>  | Body    |
| cg17793776 | 5  | 77,140,381  | 2.57E-05 | 0.240 | 0.207 |  |  |  |                |         |
| cg00538458 | 16 | 22,959,868  | 0.005077 | 0.240 | 0.238 |  |  |  |                |         |

|            |    |             |          |       |       |          |       |  |     |           |         |
|------------|----|-------------|----------|-------|-------|----------|-------|--|-----|-----------|---------|
| cg19940644 | 1  | 12,112,386  | 0.002231 | 0.240 | 0.280 |          |       |  |     |           |         |
| cg22345878 | 12 | 6,234,313   | 4.55E-08 | 0.240 | 0.264 |          |       |  |     | VWF       | TSS1500 |
| cg04924185 | 16 | 56,710,098  | 3.24E-05 | 0.240 | 0.231 |          |       |  |     | MT1IP     | Body    |
| cg19865237 | 14 | 104,690,244 | 3.44E-17 | 0.240 | 0.244 |          |       |  |     |           |         |
| cg03543600 | 17 | 4,614,422   | 0.003503 | 0.240 | 0.099 |          |       |  |     | ARRB2     | Body    |
| cg01494551 | 6  | 28,367,070  | 0.001164 | 0.240 | 0.234 |          |       |  |     | ZSCAN12   | Body    |
| cg02392179 | 10 | 106,400,114 | 1.23E-05 | 0.240 | 0.256 |          |       |  |     | SORCS3    | TSS1500 |
| cg07601320 | 12 | 47,219,841  | 0.000537 | 0.240 | 0.159 | 1.52E-20 | 0.197 |  |     | SLC38A4   | TSS200  |
| cg20474425 | 12 | 54,746,067  | 1.88E-19 | 0.240 | 0.243 |          |       |  |     |           |         |
| cg16165748 | 11 | 65,030,448  | 0.000229 | 0.240 | 0.212 |          |       |  |     | POLA2     | Body    |
| cg21521518 | 4  | 53,727,714  | 0.000194 | 0.240 | 0.152 |          |       |  |     | RASL11B   | TSS1500 |
| cg04711852 | 14 | 37,126,283  | 0.001465 | 0.240 | 0.232 |          |       |  | Yes | PAX9      | TSS1500 |
| cg05876917 | 17 | 35,014,676  | 0.002306 | 0.240 | 0.195 |          |       |  |     |           |         |
| cg16589830 | 1  | 212,284,214 | 0.000167 | 0.240 | 0.233 |          |       |  |     |           |         |
| cg01366595 | 5  | 42,952,307  | 9.49E-05 | 0.240 | 0.220 |          |       |  |     |           |         |
| cg14345676 | 5  | 175,109,098 | 0.003743 | 0.240 | 0.236 |          |       |  |     | HRH2      | 5'UTR   |
| cg14843868 | 1  | 53,791,688  | 0.003125 | 0.240 | 0.137 |          |       |  |     | LRP8      | Body    |
| cg18103394 | X  | 47,433,374  | 0.001347 | 0.240 | 0.289 |          |       |  |     | SYN1      | Body    |
| cg27499185 | 19 | 6,138,355   | 2.19E-09 | 0.240 | 0.247 |          |       |  |     | ACSBG2    | 5'UTR   |
| cg00815214 | 21 | 47,717,953  | 7.72E-10 | 0.240 | 0.220 |          |       |  |     |           |         |
| cg20125091 | 1  | 92,952,641  | 1.38E-05 | 0.240 | 0.223 | 2.05E-20 | 0.152 |  |     | GFI1      | TSS1500 |
| cg22047703 | 20 | 55,841,896  | 0.019377 | 0.240 | 0.121 |          |       |  |     | BMP7      | TSS200  |
| cg00730441 | 17 | 59,483,863  | 1.6E-13  | 0.240 | 0.241 |          |       |  |     | TBX2      | Body    |
| cg13322252 | 1  | 15,392,793  | 1.75E-11 | 0.240 | 0.243 |          |       |  |     | KIAA1026  | Body    |
| cg14966782 | 2  | 109,812,089 | 3.96E-14 | 0.240 | 0.243 |          |       |  |     | SH3RF3    | Body    |
| cg03983213 | 7  | 157,475,737 | 0.00013  | 0.240 | 0.211 |          |       |  |     | PTPRN2    | Body    |
| cg09802066 | 4  | 183,063,534 | 9.03E-07 | 0.240 | 0.244 |          |       |  |     | MGC45800  | Body    |
| cg11317690 | 4  | 6,347,280   | 5.02E-12 | 0.240 | 0.249 |          |       |  |     | PPP2R2C   | Body    |
| cg12733607 | 10 | 21,813,501  | 1.22E-07 | 0.240 | 0.272 |          |       |  |     | C10orf140 | 5'UTR   |
| cg27138223 | 2  | 109,561,317 | 1.67E-14 | 0.240 | 0.202 |          |       |  |     | EDAR      | 5'UTR   |
| cg01353903 | X  | 99,662,650  | 1.25E-06 | 0.240 | 0.227 |          |       |  |     | PCDH19    | 1stExon |
| cg05238069 | 17 | 16,257,135  | 0.000224 | 0.240 | 0.153 |          |       |  |     | CENPV     | TSS1500 |
| cg05650674 | 16 | 68,677,997  | 2.01E-14 | 0.240 | 0.215 |          |       |  |     | CDH3      | TSS200  |
| cg09674468 | 1  | 234,300,299 | 3.61E-05 | 0.240 | 0.280 |          |       |  |     | SLC35F3   | Body    |

|            |    |             |          |       |       |         |       |  |           |         |
|------------|----|-------------|----------|-------|-------|---------|-------|--|-----------|---------|
| cg10393598 | 6  | 87,862,264  | 0.014717 | 0.240 | 0.184 |         |       |  |           |         |
| cg26467528 | 6  | 31,632,248  | 6.12E-07 | 0.240 | 0.254 |         |       |  | BAT4      | Body    |
| cg20836412 | 8  | 82,543,285  | 0.000143 | 0.240 | 0.223 |         |       |  |           |         |
| cg07097722 | 20 | 43,247,325  | 2.66E-08 | 0.240 | 0.256 |         |       |  | PKIG      | 3'UTR   |
| cg25105745 | 1  | 110,141,275 | 1.44E-12 | 0.240 | 0.249 |         |       |  | MIR197    | TSS1500 |
| cg25988710 | X  | 72,667,379  | 0.000631 | 0.240 | 0.227 |         |       |  | CDX4      | 1stExon |
| cg06321998 | 6  | 27,173,991  | 0.042281 | 0.240 | 0.282 |         |       |  |           |         |
| cg13277939 | 14 | 39,735,211  | 0.000495 | 0.240 | 0.277 | 1.2E-12 | 0.177 |  | CTAGE5    | TSS1500 |
| cg15630458 | 8  | 142,986,649 | 0.001036 | 0.240 | 0.179 |         |       |  |           |         |
| cg19593949 | 1  | 205,312,444 | 1.85E-09 | 0.240 | 0.183 |         |       |  | KLHDC8A   | Body    |
| cg17881600 | 6  | 17,012,979  | 0.005905 | 0.240 | 0.105 |         |       |  |           |         |
| cg19869746 | 6  | 7,107,108   | 0.005999 | 0.240 | 0.139 |         |       |  | RREB1     | TSS1500 |
| cg08193322 | 2  | 74,730,586  | 0.032739 | 0.240 | 0.328 |         |       |  | LOC151534 | Body    |
| cg03220124 | 17 | 54,756,137  | 4.76E-08 | 0.240 | 0.223 |         |       |  |           |         |
| cg22047977 | 17 | 62,962,070  | 0.000344 | 0.240 | 0.265 |         |       |  |           |         |
| cg04344565 | 8  | 140,715,646 | 0.008549 | 0.240 | 0.278 |         |       |  | KCNK9     | TSS1500 |
| cg07160746 | 20 | 43,726,765  | 9.5E-08  | 0.240 | 0.292 |         |       |  | KCNS1     | Body    |
| cg11895696 | 7  | 105,283,982 | 1.78E-12 | 0.240 | 0.227 |         |       |  | ATXN7L1   | Body    |
| cg05949903 | 16 | 21,831,636  | 0.048008 | 0.240 | 0.088 |         |       |  | RRN3P1    | TSS1500 |
| cg24886267 | 5  | 167,956,306 | 0.041162 | 0.240 | 0.164 |         |       |  | FBLL1     | TSS1500 |
| cg01636582 | 11 | 844,593     | 7.5E-12  | 0.240 | 0.215 |         |       |  | TSPAN4    | 5'UTR   |
| cg13071386 | 3  | 37,494,403  | 3.4E-16  | 0.240 | 0.219 |         |       |  | ITGA9     | Body    |
| cg06202276 | 4  | 154,713,333 | 0.011319 | 0.240 | 0.248 |         |       |  |           |         |
| cg18268547 | 17 | 79,615,552  | 0.001861 | 0.240 | 0.249 |         |       |  | TSPAN10   | 3'UTR   |
| cg27426835 | 2  | 19,963,298  | 8.22E-07 | 0.240 | 0.213 |         |       |  |           |         |
| cg27060391 | 19 | 42,416,708  | 0.001996 | 0.240 | 0.319 |         |       |  |           |         |
| cg07537370 | 2  | 27,531,124  | 2.7E-07  | 0.240 | 0.213 |         |       |  | UCN       | 5'UTR   |
| cg15107368 | 15 | 68,260,709  | 0.01065  | 0.240 | 0.056 |         |       |  |           |         |
| cg17786642 | 1  | 54,203,678  | 0.000878 | 0.240 | 0.184 |         |       |  |           |         |
| cg10671510 | 11 | 15,494,161  | 1.43E-05 | 0.240 | 0.266 |         |       |  |           |         |
| cg03157027 | 8  | 99,959,723  | 2.27E-05 | 0.240 | 0.265 |         |       |  | OSR2      | 5'UTR   |
| cg05360714 | 17 | 75,543,046  | 2.54E-09 | 0.240 | 0.238 |         |       |  |           |         |
| cg09028204 | 20 | 43,729,808  | 5.1E-07  | 0.240 | 0.226 |         |       |  | KCNS1     | TSS200  |
| cg14606431 | 2  | 71,126,505  | 1.8E-06  | 0.240 | 0.226 |         |       |  | VAX2      | TSS1500 |

|            |    |             |          |       |       |          |       |  |                 |         |
|------------|----|-------------|----------|-------|-------|----------|-------|--|-----------------|---------|
| cg14719959 | 8  | 61,777,711  | 1.39E-07 | 0.240 | 0.230 |          |       |  | <i>CHD7</i>     | Body    |
| cg18866599 | 2  | 208,635,723 | 2.83E-05 | 0.240 | 0.242 |          |       |  |                 |         |
| cg24514391 | 1  | 20,518,904  | 1.5E-12  | 0.240 | 0.238 |          |       |  | <i>UBXN10</i>   | 3'UTR   |
| cg24673771 | 2  | 45,180,267  | 0.000645 | 0.240 | 0.218 |          |       |  |                 |         |
| cg10128164 | 14 | 31,344,535  | 0.007949 | 0.240 | 0.307 | 8.47E-08 | 0.145 |  | <i>COCH</i>     | Body    |
| cg08812555 | 10 | 54,074,788  | 0.029034 | 0.240 | 0.138 |          |       |  | <i>DKK1</i>     | Body    |
| cg06346335 | 1  | 76,489,892  | 2.33E-22 | 0.240 | 0.207 |          |       |  |                 |         |
| cg10862567 | 17 | 80,745,169  | 7.29E-08 | 0.240 | 0.241 |          |       |  | <i>TBCD</i>     | Body    |
| cg14485633 | 9  | 136,783,440 | 9.61E-18 | 0.240 | 0.243 |          |       |  | <i>VAV2</i>     | Body    |
| cg21356535 | 6  | 137,311,287 | 0.046207 | 0.240 | 0.127 |          |       |  | <i>NHEG1</i>    | Body    |
| cg01435109 | 1  | 23,496,648  | 5.6E-11  | 0.240 | 0.224 |          |       |  | <i>LUZP1</i>    | TSS1500 |
| cg20050484 | 3  | 123,339,334 | 3.01E-11 | 0.240 | 0.229 |          |       |  | <i>MYLK</i>     | 1stExon |
| cg00044665 | 16 | 66,400,411  | 4.33E-07 | 0.240 | 0.187 |          |       |  | <i>CDH5</i>     | TSS200  |
| cg06153925 | 17 | 78,755,379  | 1.99E-44 | 0.240 | 0.236 |          |       |  | <i>RPTOR</i>    | Body    |
| cg14038058 | 4  | 165,898,848 | 2.91E-08 | 0.240 | 0.232 |          |       |  | <i>TRIM61</i>   | TSS200  |
| cg21481275 | 13 | 100,639,669 | 0.002179 | 0.240 | 0.277 |          |       |  |                 |         |
| cg22367310 | 2  | 241,856,114 | 9.1E-05  | 0.240 | 0.231 |          |       |  |                 |         |
| cg00088797 | 3  | 12,976,288  | 3.25E-06 | 0.240 | 0.227 |          |       |  | <i>IQSEC1</i>   | Body    |
| cg00339913 | 8  | 22,085,227  | 6.72E-06 | 0.240 | 0.203 |          |       |  | <i>PHYHIP</i>   | Body    |
| cg08622757 | 7  | 156,799,393 | 4.12E-05 | 0.240 | 0.223 |          |       |  | <i>MNX1</i>     | Body    |
| cg19433697 | 15 | 60,294,787  | 0.005469 | 0.240 | 0.283 |          |       |  |                 |         |
| cg14956197 | 14 | 36,993,831  | 0.009384 | 0.240 | 0.355 |          |       |  |                 |         |
| cg15198000 | 4  | 75,230,839  | 0.010523 | 0.240 | 0.271 |          |       |  | <i>EREG</i>     | TSS200  |
| cg05276469 | 17 | 16,570,473  | 0.004052 | 0.240 | 0.232 |          |       |  |                 |         |
| cg08180070 | 2  | 109,647,958 | 0.000252 | 0.240 | 0.201 |          |       |  |                 |         |
| cg10505580 | 1  | 32,238,660  | 3.42E-08 | 0.240 | 0.247 |          |       |  |                 |         |
| cg23726526 | 9  | 96,711,316  | 0.034648 | 0.240 | 0.334 |          |       |  |                 |         |
| cg20784768 | 1  | 234,041,456 | 7.71E-06 | 0.240 | 0.215 |          |       |  | <i>SLC35F3</i>  | Body    |
| cg11283429 | 13 | 28,549,574  | 6.7E-05  | 0.240 | 0.246 |          |       |  |                 |         |
| cg00998451 | 13 | 100,608,123 | 5.05E-05 | 0.240 | 0.227 |          |       |  |                 |         |
| cg06902071 | 5  | 134,879,326 | 0.000236 | 0.240 | 0.243 |          |       |  |                 |         |
| cg07913197 | 2  | 200,334,901 | 0.000962 | 0.240 | 0.263 |          |       |  | <i>FLJ32063</i> | Body    |
| cg12885751 | 13 | 100,085,073 | 1.45E-05 | 0.240 | 0.215 |          |       |  |                 |         |
| cg16318349 | 1  | 154,917,307 | 7.51E-18 | 0.240 | 0.237 |          |       |  | <i>PBXIP1</i>   | 3'UTR   |

|            |    |             |          |       |       |  |  |  |                 |         |
|------------|----|-------------|----------|-------|-------|--|--|--|-----------------|---------|
| cg02366262 | 11 | 121,297,716 | 8.87E-07 | 0.240 | 0.232 |  |  |  |                 |         |
| cg01979888 | 12 | 6,665,424   | 9.99E-05 | 0.240 | 0.218 |  |  |  | <i>IFFO1</i>    | TSS200  |
| cg04935109 | 3  | 187,086,530 | 0.000274 | 0.240 | 0.149 |  |  |  | <i>RTP4</i>     | Body    |
| cg07301795 | 5  | 157,001,698 | 0.000448 | 0.240 | 0.262 |  |  |  | <i>ADAM19</i>   | Body    |
| cg26007189 | 5  | 176,166,980 | 1.87E-06 | 0.240 | 0.243 |  |  |  |                 |         |
| cg03322338 | 11 | 1,403,751   | 0.000357 | 0.240 | 0.309 |  |  |  |                 |         |
| cg04945457 | 16 | 56,894,587  | 7.93E-07 | 0.240 | 0.261 |  |  |  |                 |         |
| cg07540652 | 8  | 81,805,956  | 3.01E-06 | 0.240 | 0.195 |  |  |  |                 |         |
| cg21160842 | 11 | 32,112,091  | 2.55E-07 | 0.240 | 0.219 |  |  |  | <i>RCN1</i>     | TSS1500 |
| cg04657325 | 4  | 185,435,601 | 0.000745 | 0.240 | 0.216 |  |  |  |                 |         |
| cg19386336 | X  | 100,546,064 | 0.001255 | 0.240 | 0.197 |  |  |  | <i>TAF7L</i>    | Body    |
| cg21618017 | 12 | 124,016,861 | 0.000121 | 0.240 | 0.217 |  |  |  | <i>RILPL1</i>   | Body    |
| cg13426351 | 9  | 132,956,279 | 3.34E-12 | 0.240 | 0.229 |  |  |  | <i>FREQ</i>     | Body    |
| cg00162231 | 3  | 11,035,357  | 0.022689 | 0.240 | 0.261 |  |  |  | <i>SLC6A1</i>   | 5'UTR   |
| cg20954971 | 21 | 44,593,642  | 0.005743 | 0.240 | 0.265 |  |  |  |                 |         |
| cg23205629 | 8  | 33,421,410  | 1.05E-14 | 0.240 | 0.231 |  |  |  | <i>RNF122</i>   | Body    |
| cg10060574 | 6  | 30,712,338  | 0.002096 | 0.240 | 0.221 |  |  |  | <i>IER3</i>     | TSS200  |
| cg08509172 | 19 | 19,383,838  | 0.006462 | 0.240 | 0.127 |  |  |  | <i>TM6SF2</i>   | Body    |
| cg02994349 | 1  | 66,999,753  | 0.004167 | 0.240 | 0.212 |  |  |  | <i>SGIP1</i>    | TSS200  |
| cg03731303 | 3  | 181,443,009 | 2.51E-06 | 0.240 | 0.220 |  |  |  | <i>SOX2OT</i>   | Body    |
| cg05191175 | 5  | 134,827,218 | 0.000851 | 0.240 | 0.167 |  |  |  |                 |         |
| cg18956933 | 3  | 147,136,904 | 0.009926 | 0.240 | 0.281 |  |  |  |                 |         |
| cg08791347 | 10 | 13,831,250  | 7.78E-07 | 0.240 | 0.257 |  |  |  | <i>FRMD4A</i>   | Body    |
| cg12798118 | 17 | 15,166,031  | 0.033336 | 0.240 | 0.161 |  |  |  | <i>PMP22</i>    | TSS200  |
| cg02180498 | 6  | 31,830,572  | 0.044954 | 0.240 | 0.229 |  |  |  | <i>NEU1</i>     | 5'UTR   |
| cg02278646 | 12 | 45,608,691  | 9.54E-13 | 0.240 | 0.230 |  |  |  | <i>ANO6</i>     | TSS1500 |
| cg17910813 | 19 | 47,923,387  | 4.67E-05 | 0.240 | 0.266 |  |  |  | <i>MEIS3</i>    | TSS1500 |
| cg19717773 | 7  | 2,847,554   | 0.004046 | 0.240 | 0.140 |  |  |  | <i>GNA12</i>    | Body    |
| cg01413582 | 6  | 30,652,688  | 8.03E-05 | 0.240 | 0.232 |  |  |  | <i>KIAA1949</i> | Body    |
| cg04207385 | 6  | 88,877,064  | 0.000139 | 0.240 | 0.266 |  |  |  | <i>CNR1</i>     | TSS1500 |
| cg06606386 | 19 | 13,947,469  | 2.32E-08 | 0.240 | 0.236 |  |  |  | <i>MIR27A</i>   | TSS200  |
| cg11731221 | 6  | 30,418,508  | 1.97E-05 | 0.240 | 0.272 |  |  |  |                 |         |
| cg18406255 | 2  | 144,995,067 | 0.000954 | 0.240 | 0.235 |  |  |  | <i>GTDC1</i>    | 5'UTR   |
| cg15355388 | 11 | 57,004,919  | 8.27E-06 | 0.240 | 0.273 |  |  |  | <i>APLNR</i>    | Body    |



|            |    |             |          |       |       |          |       |  |                |         |
|------------|----|-------------|----------|-------|-------|----------|-------|--|----------------|---------|
| cg08569678 | 8  | 143,781,397 | 0.004866 | 0.240 | 0.212 |          |       |  | <i>LY6K</i>    | TSS200  |
| cg14349667 | 4  | 81,189,706  | 0.001416 | 0.240 | 0.249 |          |       |  | <i>FGF5</i>    | Body    |
| cg24699719 | 5  | 74,913,041  | 5.96E-08 | 0.240 | 0.232 |          |       |  |                |         |
| cg03032512 | 17 | 77,030,418  | 1.35E-08 | 0.240 | 0.193 |          |       |  | <i>C1QTNF1</i> | TSS200  |
| cg09088836 | 6  | 2,510,144   | 2.64E-12 | 0.240 | 0.227 |          |       |  |                |         |
| cg15559674 | 6  | 149,803,426 | 9.91E-07 | 0.240 | 0.237 |          |       |  | <i>ZC3H12D</i> | 5'UTR   |
| cg19938199 | 15 | 63,233,164  | 5.66E-07 | 0.240 | 0.230 |          |       |  |                |         |
| cg24162251 | 14 | 32,420,205  | 2.28E-05 | 0.240 | 0.214 |          |       |  |                |         |
| cg05363616 | 1  | 119,529,219 | 1.44E-07 | 0.240 | 0.266 |          |       |  | <i>TBX15</i>   | 5'UTR   |
| cg25662822 | 3  | 116,755,155 | 1.1E-13  | 0.240 | 0.243 |          |       |  |                |         |
| cg05341539 | 15 | 86,233,214  | 0.011056 | 0.240 | 0.233 |          |       |  | <i>AKAP13</i>  | Body    |
| cg01438365 | 17 | 59,480,470  | 4.47E-06 | 0.240 | 0.226 |          |       |  | <i>TBX2</i>    | Body    |
| cg02928928 | 11 | 1,975,304   | 1.28E-11 | 0.239 | 0.220 |          |       |  | <i>MRPL23</i>  | Body    |
| cg14326472 | 9  | 126,164,083 | 8.58E-20 | 0.239 | 0.227 |          |       |  | <i>DENND1A</i> | 3'UTR   |
| cg14952457 | 6  | 50,818,685  | 8.65E-05 | 0.239 | 0.247 |          |       |  |                |         |
| cg11039476 | 2  | 127,978,579 | 1.83E-06 | 0.239 | 0.230 |          |       |  |                |         |
| cg06390651 | 2  | 177,023,667 | 0.000565 | 0.239 | 0.188 |          |       |  |                |         |
| cg06857289 | 4  | 13,524,306  | 0.040873 | 0.239 | 0.335 |          |       |  |                |         |
| cg13831540 | 7  | 130,128,420 | 3.87E-21 | 0.239 | 0.230 |          |       |  | <i>MESTIT1</i> | Body    |
| cg27128761 | 5  | 151,055,650 | 8.71E-12 | 0.239 | 0.224 |          |       |  | <i>SPARC</i>   | Body    |
| cg09462924 | 2  | 66,666,470  | 0.042393 | 0.239 | 0.328 |          |       |  | <i>MEIS1</i>   | Body    |
| cg03114255 | 6  | 150,358,985 | 0.044616 | 0.239 | 0.168 |          |       |  |                |         |
| cg05222794 | 20 | 60,540,550  | 5.08E-06 | 0.239 | 0.235 |          |       |  |                |         |
| cg10603592 | 17 | 40,896,097  | 3.05E-12 | 0.239 | 0.227 |          |       |  | <i>EZH1</i>    | 5'UTR   |
| cg10397932 | 1  | 2,166,155   | 0.000171 | 0.239 | 0.325 |          |       |  | <i>SKI</i>     | Body    |
| cg24312680 | 4  | 128,704,518 | 0.008852 | 0.239 | 0.248 |          |       |  | <i>HSPA4L</i>  | Body    |
| cg27584013 | 1  | 23,012,439  | 1.13E-10 | 0.239 | 0.264 |          |       |  |                |         |
| cg10753889 | 11 | 116,706,520 | 0.028706 | 0.239 | 0.184 |          |       |  | <i>APOA1</i>   | 3'UTR   |
| cg20523861 | 13 | 70,682,324  | 0.001546 | 0.239 | 0.199 | 5.64E-22 | 0.230 |  | <i>KLHL1</i>   | 1stExon |
| cg26104293 | 6  | 91,499,812  | 5.06E-12 | 0.239 | 0.217 |          |       |  |                |         |
| cg10368049 | 7  | 94,023,796  | 0.002127 | 0.239 | 0.190 |          |       |  | <i>COL1A2</i>  | TSS200  |
| cg19960891 | 11 | 63,776,653  | 0.015478 | 0.239 | 0.116 |          |       |  | <i>MACROD1</i> | Body    |
| cg15129679 | 1  | 85,513,315  | 1.37E-06 | 0.239 | 0.211 |          |       |  | <i>MCOLN3</i>  | 5'UTR   |
| cg22629111 | 1  | 166,135,208 | 3.79E-06 | 0.239 | 0.264 |          |       |  | <i>FAM78B</i>  | Body    |

|            |    |             |          |       |       |          |       |  |                  |         |
|------------|----|-------------|----------|-------|-------|----------|-------|--|------------------|---------|
| cg16264705 | 12 | 54,071,194  | 0.024254 | 0.239 | 0.216 |          |       |  | <i>ATP5G2</i>    | TSS1500 |
| cg18168249 | 7  | 134,946,296 | 0.000374 | 0.239 | 0.253 |          |       |  |                  |         |
| cg20137746 | 10 | 27,235,598  | 4.92E-06 | 0.239 | 0.258 |          |       |  |                  |         |
| cg00754253 | 11 | 63,259,187  | 1.51E-09 | 0.239 | 0.249 |          |       |  | <i>HRASLS5</i>   | TSS1500 |
| cg06312072 | 12 | 99,287,129  | 1.29E-05 | 0.239 | 0.181 |          |       |  | <i>ANKS1B</i>    | Body    |
| cg15443952 | 7  | 100,817,963 | 0.000979 | 0.239 | 0.323 |          |       |  | <i>C7orf52</i>   | Body    |
| cg12757155 | 18 | 5,628,325   | 0.011911 | 0.239 | 0.284 |          |       |  |                  |         |
| cg14592399 | 4  | 41,881,933  | 3.07E-06 | 0.239 | 0.205 |          |       |  |                  |         |
| cg23590187 | 7  | 29,686,098  | 2.2E-05  | 0.239 | 0.260 |          |       |  | <i>LOC646762</i> | Body    |
| cg14582226 | 7  | 116,164,743 | 0.00986  | 0.239 | 0.170 |          |       |  | <i>CAV1</i>      | TSS200  |
| cg18224993 | 11 | 78,521,705  | 2.92E-15 | 0.239 | 0.241 |          |       |  | <i>ODZ4</i>      | Body    |
| cg18661868 | 15 | 91,427,965  | 0.001637 | 0.239 | 0.169 | 2.39E-08 | 0.081 |  | <i>FES</i>       | 5'UTR   |
| cg19723734 | 7  | 2,271,673   | 2.33E-06 | 0.239 | 0.252 |          |       |  | <i>MAD1L1</i>    | 5'UTR   |
| cg06772268 | 5  | 81,342,312  | 4.22E-19 | 0.239 | 0.211 |          |       |  | <i>ATG10</i>     | Body    |
| cg13348944 | 11 | 118,047,121 | 0.00052  | 0.239 | 0.256 | 4.03E-17 | 0.149 |  | <i>SCN2B</i>     | 1stExon |
| cg22900415 | 13 | 20,736,075  | 7.24E-05 | 0.239 | 0.210 |          |       |  | <i>GJA3</i>      | TSS1500 |
| cg02915422 | X  | 150,863,331 | 0.001071 | 0.239 | 0.262 |          |       |  |                  |         |
| cg02508830 | 7  | 102,576,358 | 6.29E-07 | 0.239 | 0.252 |          |       |  | <i>FBXL13</i>    | Body    |
| cg06570025 | 21 | 34,444,245  | 0.032183 | 0.239 | 0.241 |          |       |  | <i>OLIG1</i>     | 1stExon |
| cg11883737 | 3  | 129,276,179 | 6.73E-31 | 0.239 | 0.246 |          |       |  | <i>PLXND1</i>    | Body    |
| cg20040765 | 8  | 67,358,546  | 1.08E-06 | 0.239 | 0.259 |          |       |  | <i>ADHFE1</i>    | Body    |
| cg23112192 | 17 | 27,893,542  | 6.57E-07 | 0.239 | 0.216 |          |       |  | <i>ABHD15</i>    | 1stExon |
| cg07653695 | 2  | 102,175,888 | 7.63E-05 | 0.239 | 0.226 |          |       |  |                  |         |
| cg21932416 | 2  | 176,997,707 | 2.18E-08 | 0.239 | 0.216 |          |       |  |                  |         |
| cg24227728 | 19 | 11,590,393  | 0.006414 | 0.239 | 0.258 |          |       |  | <i>ELAVL3</i>    | Body    |
| cg03314569 | 1  | 32,041,732  | 1.52E-11 | 0.239 | 0.247 |          |       |  | <i>TINAGL1</i>   | TSS1500 |
| cg05147273 | 17 | 74,696,804  | 2.32E-12 | 0.239 | 0.230 |          |       |  | <i>MXRA7</i>     | Body    |
| cg10543035 | 1  | 179,545,790 | 2.46E-06 | 0.239 | 0.190 |          |       |  | <i>NPHS2</i>     | TSS1500 |
| cg06017559 | 16 | 1,026,760   | 1.27E-11 | 0.239 | 0.221 |          |       |  |                  |         |
| cg26449787 | 6  | 133,562,087 | 1.96E-05 | 0.239 | 0.304 |          |       |  | <i>EYA4</i>      | TSS1500 |
| cg04537567 | 6  | 99,296,068  | 3.34E-05 | 0.239 | 0.197 |          |       |  |                  |         |
| cg13391244 | 7  | 120,629,638 | 5.02E-10 | 0.239 | 0.214 |          |       |  | <i>C7orf58</i>   | 5'UTR   |
| cg27405988 | 3  | 48,171,915  | 3.54E-06 | 0.239 | 0.253 |          |       |  |                  |         |
| cg03059247 | 8  | 11,287,657  | 1.71E-10 | 0.239 | 0.228 |          |       |  | <i>C8orf12</i>   | Body    |

|            |    |             |          |       |       |           |       |  |                |         |
|------------|----|-------------|----------|-------|-------|-----------|-------|--|----------------|---------|
| cg11911305 | 19 | 45,428,924  | 1.62E-11 | 0.239 | 0.242 |           |       |  | <i>APOC1P1</i> | TSS1500 |
| cg16050897 | 17 | 71,361,894  | 5.13E-07 | 0.239 | 0.240 |           |       |  | <i>SDK2</i>    | Body    |
| cg20531550 | 7  | 128,550,902 | 3.13E-16 | 0.239 | 0.234 |           |       |  | <i>KCP</i>     | TSS200  |
| cg03190219 | 7  | 25,898,688  | 1.09E-09 | 0.239 | 0.220 |           |       |  |                |         |
| cg19839026 | 14 | 51,410,501  | 0.001561 | 0.239 | 0.244 |           |       |  | <i>PYGL</i>    | Body    |
| cg20930815 | 11 | 9,099,393   | 1.04E-11 | 0.239 | 0.214 |           |       |  | <i>SCUBE2</i>  | Body    |
| cg09364590 | 6  | 155,537,901 | 3.42E-13 | 0.239 | 0.210 |           |       |  | <i>TIAM2</i>   | Body    |
| cg11242303 | 1  | 67,773,725  | 0.02149  | 0.239 | 0.084 |           |       |  | <i>IL12RB2</i> | 5'UTR   |
| cg16987638 | 6  | 1,601,509   | 0.000877 | 0.239 | 0.155 |           |       |  |                |         |
| cg17207266 | 2  | 25,562,957  | 1.75E-09 | 0.239 | 0.201 |           |       |  | <i>DNMT3A</i>  | 5'UTR   |
| cg00204465 | 17 | 73,583,945  | 3.25E-05 | 0.239 | 0.242 |           |       |  | <i>MYO15B</i>  | TSS200  |
| cg27627006 | 11 | 96,072,706  | 5.72E-06 | 0.239 | 0.222 |           |       |  | <i>MAML2</i>   | Body    |
| cg07328888 | 13 | 33,002,693  | 0.009599 | 0.239 | 0.167 |           |       |  | <i>N4BP2L1</i> | TSS1500 |
| cg27452217 | 1  | 116,371,037 | 2.01E-05 | 0.239 | 0.232 |           |       |  |                |         |
| cg02569115 | 17 | 76,922,138  | 1.59E-06 | 0.239 | 0.251 |           |       |  | <i>TIMP2</i>   | TSS1500 |
| cg13500072 | 1  | 36,788,387  | 3.55E-06 | 0.239 | 0.225 |           |       |  | <i>FAM176B</i> | Body    |
| cg01466330 | 8  | 39,835,697  | 4.93E-11 | 0.239 | 0.174 |           |       |  | <i>IDO2</i>    | Body    |
| cg03784793 | 3  | 116,058,982 | 0.004342 | 0.239 | 0.165 |           |       |  | <i>LSAMP</i>   | Body    |
| cg13152535 | 19 | 51,226,557  | 0.001748 | 0.239 | 0.328 | 0.0000137 | 0.083 |  | <i>CLEC11A</i> | TSS200  |
| cg24815529 | 19 | 55,592,342  | 4.95E-05 | 0.239 | 0.213 |           |       |  | <i>EPS8L1</i>  | Body    |
| cg01858698 | 1  | 46,954,407  | 5.11E-07 | 0.239 | 0.225 |           |       |  |                |         |
| cg07546334 | 3  | 152,557,119 | 4.3E-07  | 0.239 | 0.222 |           |       |  |                |         |
| cg15109744 | 1  | 180,917,873 | 4.57E-15 | 0.239 | 0.228 |           |       |  |                |         |
| cg25978487 | 6  | 32,157,150  | 0.000104 | 0.239 | 0.204 |           |       |  | <i>PBX2</i>    | Body    |
| cg27428520 | 1  | 204,100,192 | 5.26E-12 | 0.239 | 0.224 |           |       |  | <i>ETNK2</i>   | 3'UTR   |
| cg02864619 | 17 | 78,933,961  | 1.17E-84 | 0.239 | 0.235 |           |       |  | <i>RPTOR</i>   | Body    |
| cg01194371 | 5  | 79,331,477  | 0.000597 | 0.239 | 0.236 |           |       |  | <i>THBS4</i>   | Body    |
| cg12405136 | 11 | 68,781,357  | 2.77E-05 | 0.239 | 0.203 |           |       |  | <i>MRGPRF</i>  | TSS1500 |
| cg15624624 | 10 | 114,819,357 | 3.52E-05 | 0.239 | 0.200 |           |       |  | <i>TCF7L2</i>  | Body    |
| cg04084892 | 2  | 17,722,836  | 0.00134  | 0.239 | 0.245 |           |       |  | <i>VSNL1</i>   | 5'UTR   |
| cg18407955 | 7  | 158,110,685 | 1.45E-06 | 0.239 | 0.224 |           |       |  | <i>PTPRN2</i>  | Body    |
| cg12061236 | 6  | 151,560,886 | 8.47E-06 | 0.239 | 0.229 | 2.64E-08  | 0.098 |  | <i>AKAP12</i>  | TSS1500 |
| cg22796922 | 7  | 48,031,800  | 0.010185 | 0.239 | 0.226 |           |       |  | <i>SUNC1</i>   | Body    |
| cg06808089 | 3  | 45,708,680  | 3.5E-17  | 0.239 | 0.236 |           |       |  | <i>LIMD1</i>   | Body    |

|            |    |             |          |       |       |          |       |  |               |         |
|------------|----|-------------|----------|-------|-------|----------|-------|--|---------------|---------|
| cg26632948 | 13 | 25,711,193  | 3.09E-05 | 0.239 | 0.194 |          |       |  |               |         |
| cg04944806 | 6  | 27,798,932  | 0.012083 | 0.239 | 0.184 |          |       |  |               |         |
| cg03548415 | 11 | 111,991,342 | 2.43E-08 | 0.239 | 0.251 |          |       |  |               |         |
| cg16908257 | 12 | 54,404,893  | 0.000326 | 0.239 | 0.176 |          |       |  | <i>HOXC8</i>  | Body    |
| cg17386213 | 6  | 108,488,335 | 0.002431 | 0.239 | 0.256 |          |       |  | <i>NR2E1</i>  | Body    |
| cg26899651 | 17 | 75,441,392  | 2.48E-09 | 0.239 | 0.223 |          |       |  | <i>SEPT9</i>  | Body    |
| cg01876548 | 5  | 124,126,863 | 1.22E-09 | 0.239 | 0.247 |          |       |  |               |         |
| cg02333730 | 17 | 12,199,913  | 9.39E-09 | 0.239 | 0.204 |          |       |  |               |         |
| cg00409356 | 5  | 1,879,525   | 3.05E-05 | 0.239 | 0.230 |          |       |  | <i>IRX4</i>   | Body    |
| cg04279973 | 16 | 23,846,968  | 0.001397 | 0.239 | 0.196 |          |       |  | <i>PRKCB</i>  | TSS1500 |
| cg12836280 | 5  | 50,260,240  | 0.000472 | 0.239 | 0.175 |          |       |  |               |         |
| cg17611193 | 19 | 35,395,942  | 0.007397 | 0.239 | 0.203 |          |       |  |               |         |
| cg17862558 | 4  | 106,137,048 | 7.98E-08 | 0.239 | 0.236 |          |       |  | <i>TET2</i>   | 5'UTR   |
| cg19501909 | 22 | 38,001,083  | 1.96E-05 | 0.239 | 0.228 |          |       |  |               |         |
| cg25544075 | 1  | 1,109,315   | 0.00025  | 0.239 | 0.233 |          |       |  | <i>TLL10</i>  | 5'UTR   |
| cg26472684 | 6  | 14,763,072  | 7.41E-20 | 0.239 | 0.224 |          |       |  |               |         |
| cg18642177 | 1  | 228,195,779 | 0.000159 | 0.239 | 0.250 |          |       |  | <i>WNT3A</i>  | Body    |
| cg09722609 | 5  | 149,887,422 | 2.29E-16 | 0.239 | 0.230 |          |       |  | <i>NDST1</i>  | TSS1500 |
| cg12942552 | 5  | 57,749,839  | 4.9E-09  | 0.239 | 0.257 |          |       |  | <i>PLK2</i>   | 3'UTR   |
| cg24777399 | 2  | 109,855,574 | 1.87E-10 | 0.239 | 0.247 |          |       |  | <i>SH3RF3</i> | Body    |
| cg04948014 | 12 | 120,241,494 | 2.77E-11 | 0.239 | 0.220 |          |       |  | <i>CIT</i>    | Body    |
| cg12111783 | X  | 40,027,674  | 1.71E-25 | 0.239 | 0.216 |          |       |  | <i>BCOR</i>   | 5'UTR   |
| cg12340454 | 15 | 61,519,486  | 0.000237 | 0.239 | 0.169 |          |       |  | <i>RORA</i>   | Body    |
| cg13128937 | 13 | 95,357,743  | 0.00163  | 0.239 | 0.252 |          |       |  |               |         |
| cg22891868 | 2  | 223,536,069 | 2.26E-15 | 0.239 | 0.208 |          |       |  | <i>MOGAT1</i> | TSS1500 |
| cg25843866 | 6  | 168,079,818 | 3.03E-05 | 0.239 | 0.230 |          |       |  |               |         |
| cg21209876 | 14 | 23,447,792  | 6.39E-08 | 0.239 | 0.253 |          |       |  | <i>JUB</i>    | Body    |
| cg15482931 | 15 | 27,019,448  | 9.93E-05 | 0.239 | 0.194 |          |       |  | <i>GABRB3</i> | TSS1500 |
| cg24690479 | 6  | 10,521,142  | 4.44E-08 | 0.239 | 0.203 |          |       |  | <i>GCNT2</i>  | TSS1500 |
| cg13351583 | 9  | 91,793,648  | 2.12E-05 | 0.239 | 0.238 | 1.46E-08 | 0.079 |  | <i>SHC3</i>   | 1stExon |
| cg07714276 | 6  | 7,169,632   | 7.67E-12 | 0.239 | 0.219 |          |       |  | <i>RREB1</i>  | 5'UTR   |
| cg09788586 | 12 | 114,337,676 | 3.64E-07 | 0.239 | 0.223 |          |       |  | <i>RBM19</i>  | Body    |
| cg11590714 | X  | 49,832,148  | 1.59E-13 | 0.239 | 0.246 |          |       |  | <i>CLCN5</i>  | Body    |
| cg13480738 | 2  | 46,110,087  | 4.9E-11  | 0.239 | 0.241 |          |       |  | <i>PRKCE</i>  | Body    |

|            |    |             |          |       |       |         |       |  |                  |         |
|------------|----|-------------|----------|-------|-------|---------|-------|--|------------------|---------|
| cg15514496 | 18 | 12,287,561  | 1.5E-08  | 0.239 | 0.208 |         |       |  |                  |         |
| cg25103337 | 1  | 9,293,583   | 1.81E-08 | 0.239 | 0.237 |         |       |  | <i>H6PD</i>      | TSS1500 |
| cg11832210 | 10 | 91,295,346  | 0.048771 | 0.239 | 0.304 |         |       |  | <i>SLC16A12</i>  | TSS200  |
| cg14458619 | 9  | 8,858,644   | 0.001817 | 0.239 | 0.188 |         |       |  | <i>PTPRD</i>     | 5'UTR   |
| cg25964728 | 3  | 136,539,328 | 0.001859 | 0.239 | 0.157 |         |       |  | <i>TMEM22</i>    | 5'UTR   |
| cg12974388 | 2  | 237,072,998 | 0.045401 | 0.239 | 0.260 |         |       |  |                  |         |
| cg01723876 | 1  | 21,978,856  | 2.29E-10 | 0.239 | 0.224 |         |       |  | <i>RAP1GAP</i>   | 5'UTR   |
| cg16366546 | 10 | 24,672,795  | 9.97E-07 | 0.239 | 0.213 |         |       |  | <i>KIAA1217</i>  | Body    |
| cg05576992 | 8  | 969,029     | 1.09E-07 | 0.239 | 0.196 |         |       |  |                  |         |
| cg12988424 | 3  | 62,355,884  | 0.021949 | 0.239 | 0.286 |         |       |  | <i>FEZF2</i>     | Body    |
| cg19279973 | 3  | 15,563,149  | 0.000136 | 0.239 | 0.252 |         |       |  | <i>COLQ</i>      | 1stExon |
| cg21166964 | 5  | 72,529,816  | 6.39E-07 | 0.239 | 0.175 |         |       |  |                  |         |
| cg00157016 | 2  | 24,344,064  | 1.51E-12 | 0.239 | 0.253 |         |       |  | <i>PFN4</i>      | Body    |
| cg06832449 | 10 | 35,069,982  | 5.48E-06 | 0.239 | 0.228 |         |       |  | <i>PARD3</i>     | Body    |
| cg09238180 | 2  | 176,993,632 | 0.000482 | 0.239 | 0.254 |         |       |  | <i>HOXD8</i>     | TSS1500 |
| cg15009198 | 2  | 97,429,502  | 7.75E-13 | 0.239 | 0.211 |         |       |  | <i>CNNM4</i>     | Body    |
| cg15136975 | 1  | 19,781,337  | 2.36E-06 | 0.239 | 0.266 |         |       |  | <i>CAPZB</i>     | Body    |
| cg23205387 | 7  | 152,623,043 | 0.00491  | 0.239 | 0.264 |         |       |  |                  |         |
| cg01210589 | 14 | 89,895,742  | 0.000161 | 0.239 | 0.180 |         |       |  | <i>FOXN3</i>     | 5'UTR   |
| cg05005332 | 9  | 98,979,142  | 7.74E-14 | 0.239 | 0.251 |         |       |  |                  |         |
| cg23115907 | 6  | 137,817,260 | 0.000988 | 0.239 | 0.250 |         |       |  |                  |         |
| cg00304185 | 16 | 1,033,074   | 9.49E-05 | 0.239 | 0.223 |         |       |  | <i>SOX8</i>      | Body    |
| cg01104119 | 2  | 131,186,487 | 7.13E-15 | 0.239 | 0.223 |         |       |  |                  |         |
| cg07155013 | 6  | 140,030,345 | 2.93E-20 | 0.239 | 0.233 |         |       |  |                  |         |
| cg05467716 | 17 | 62,774,079  | 2.71E-15 | 0.239 | 0.235 |         |       |  | <i>LOC146880</i> | Body    |
| cg23647784 | 10 | 24,386,611  | 1.38E-11 | 0.239 | 0.237 |         |       |  | <i>KIAA1217</i>  | 5'UTR   |
| cg05142765 | 14 | 95,234,822  | 3.84E-05 | 0.239 | 0.241 |         |       |  | <i>GSC</i>       | 3'UTR   |
| cg04503600 | 5  | 140,798,188 | 0.000733 | 0.239 | 0.258 |         |       |  | <i>PCDHGA4</i>   | Body    |
| cg00562180 | 16 | 89,638,519  | 6.54E-10 | 0.239 | 0.236 |         |       |  |                  |         |
| cg20023898 | 16 | 67,048,469  | 5.57E-05 | 0.239 | 0.205 |         |       |  |                  |         |
| cg01305421 | 12 | 102,874,286 | 2.84E-05 | 0.239 | 0.240 | 1.8E-10 | 0.121 |  | <i>IGF1</i>      | 5'UTR   |
| cg02237629 | 14 | 57,264,095  | 0.000499 | 0.239 | 0.245 |         |       |  |                  |         |
| cg06625244 | 19 | 54,175,187  | 4.23E-06 | 0.239 | 0.260 |         |       |  | <i>MIR1323</i>   | TSS200  |
| cg08679238 | 3  | 46,449,100  | 1.29E-06 | 0.239 | 0.232 |         |       |  | <i>CCRL2</i>     | 1stExon |

|            |    |             |          |       |       |           |       |  |                 |         |
|------------|----|-------------|----------|-------|-------|-----------|-------|--|-----------------|---------|
| cg22959260 | 15 | 40,382,862  | 1.31E-25 | 0.239 | 0.229 |           |       |  | <i>BMF</i>      | 3'UTR   |
| cg11704005 | 1  | 19,002,948  | 5.05E-08 | 0.238 | 0.245 |           |       |  | <i>PAX7</i>     | Body    |
| cg23732781 | 6  | 29,595,016  | 1.38E-06 | 0.238 | 0.229 |           |       |  | <i>GABBR1</i>   | Body    |
| cg23978504 | 3  | 181,413,373 | 0.007982 | 0.238 | 0.278 |           |       |  | <i>SOX2OT</i>   | Body    |
| cg14336737 | 10 | 74,079,845  | 0.01389  | 0.238 | 0.153 |           |       |  |                 |         |
| cg16002355 | 4  | 111,544,387 | 0.046916 | 0.238 | 0.203 |           |       |  | <i>PITX2</i>    | Body    |
| cg08463758 | 20 | 39,995,649  | 2.22E-05 | 0.238 | 0.202 |           |       |  | <i>EMILIN3</i>  | TSS200  |
| cg22165175 | 1  | 111,148,915 | 6.61E-06 | 0.238 | 0.197 | 8.18E-17  | 0.176 |  | <i>KCNA2</i>    | TSS1500 |
| cg25775494 | 6  | 108,490,895 | 1.14E-07 | 0.238 | 0.243 |           |       |  | <i>NR2E1</i>    | Body    |
| cg04835613 | 22 | 39,410,292  | 2.37E-06 | 0.238 | 0.215 |           |       |  | <i>APOBEC3C</i> | 1stExon |
| cg05401364 | 3  | 112,967,129 | 1.44E-07 | 0.238 | 0.230 |           |       |  | <i>BOC</i>      | 5'UTR   |
| cg04237918 | 22 | 38,435,259  | 2.38E-05 | 0.238 | 0.267 |           |       |  |                 |         |
| cg14509153 | 9  | 127,274,614 | 3.3E-08  | 0.238 | 0.228 |           |       |  |                 |         |
| cg25379036 | 6  | 125,544,500 | 8.57E-13 | 0.238 | 0.225 |           |       |  | <i>TPD52L1</i>  | Body    |
| cg26327804 | 8  | 140,714,489 | 3.95E-05 | 0.238 | 0.205 |           |       |  | <i>KCNK9</i>    | Body    |
| cg03317811 | 2  | 42,329,494  | 5.64E-05 | 0.238 | 0.235 |           |       |  |                 |         |
| cg02361903 | 1  | 110,452,616 | 4.53E-10 | 0.238 | 0.235 |           |       |  | <i>CSF1</i>     | TSS1500 |
| cg04158367 | 1  | 92,952,440  | 0.001957 | 0.238 | 0.217 |           |       |  | <i>GFI1</i>     | TSS1500 |
| cg26725502 | 11 | 27,034,225  | 9.16E-11 | 0.238 | 0.222 |           |       |  |                 |         |
| cg04629204 | 1  | 26,348,325  | 8.12E-12 | 0.238 | 0.212 | 1.59E-26  | 0.133 |  | <i>EXTL1</i>    | 1stExon |
| cg07703690 | 11 | 27,062,963  | 6.27E-25 | 0.238 | 0.221 |           |       |  | <i>BBOX1</i>    | 5'UTR   |
| cg26486663 | 16 | 2,040,863   | 0.005772 | 0.238 | 0.282 | 0.0000172 | 0.085 |  | <i>SYNGR3</i>   | Body    |
| cg09169779 | 13 | 20,751,710  | 9.17E-14 | 0.238 | 0.211 |           |       |  |                 |         |
| cg02054667 | 14 | 54,687,314  | 0.009124 | 0.238 | 0.228 |           |       |  |                 |         |
| cg13488013 | 17 | 47,592,680  | 4.71E-05 | 0.238 | 0.249 |           |       |  |                 |         |
| cg13835168 | 6  | 29,648,756  | 0.003761 | 0.238 | 0.174 |           |       |  |                 |         |
| cg15237857 | 2  | 45,511      | 4.69E-05 | 0.238 | 0.131 |           |       |  | <i>FAM110C</i>  | 1stExon |
| cg23198707 | 3  | 112,023,284 | 1.32E-06 | 0.238 | 0.229 |           |       |  |                 |         |
| cg25821781 | 17 | 2,325,143   | 5.3E-15  | 0.238 | 0.226 |           |       |  | <i>METT10D</i>  | Body    |
| cg10375078 | 10 | 22,624,374  | 0.01226  | 0.238 | 0.305 |           |       |  |                 |         |
| cg20191453 | 3  | 49,459,855  | 1.54E-08 | 0.238 | 0.243 | 1.88E-11  | 0.178 |  | <i>AMT</i>      | Body    |
| cg08084860 | 2  | 237,080,340 | 0.00109  | 0.238 | 0.213 |           |       |  |                 |         |
| cg08530414 | 11 | 35,160,400  | 0.00486  | 0.238 | 0.317 | 2.77E-20  | 0.226 |  | <i>CD44</i>     | TSS200  |
| cg10595547 | 10 | 119,310,911 | 0.000476 | 0.238 | 0.271 |           |       |  |                 |         |

|            |    |             |          |       |       |            |       |     |  |                 |         |
|------------|----|-------------|----------|-------|-------|------------|-------|-----|--|-----------------|---------|
| cg11851174 | 17 | 17,712,609  | 1.46E-30 | 0.238 | 0.238 |            |       |     |  | <i>RAI1</i>     | Body    |
| cg18823647 | 4  | 99,580,449  | 6.37E-05 | 0.238 | 0.216 |            |       | Yes |  | <i>TSPAN5</i>   | TSS1500 |
| cg25500050 | 12 | 8,171,633   | 0.005536 | 0.238 | 0.262 |            |       |     |  |                 |         |
| cg02245998 | 2  | 100,210,626 | 4.57E-10 | 0.238 | 0.196 |            |       |     |  | <i>AFF3</i>     | Body    |
| cg11194545 | X  | 105,066,793 | 0.035719 | 0.238 | 0.323 |            |       |     |  | <i>NRK</i>      | 5'UTR   |
| cg08251815 | 2  | 85,106,968  | 0.000139 | 0.238 | 0.280 |            |       |     |  | <i>C2orf89</i>  | Body    |
| cg10215414 | 16 | 67,361,708  | 5.44E-15 | 0.238 | 0.231 |            |       |     |  | <i>KCTD19</i>   | TSS1500 |
| cg22399984 | 6  | 1,601,802   | 2.54E-07 | 0.238 | 0.194 |            |       |     |  |                 |         |
| cg17755907 | 5  | 141,293,917 | 0.00916  | 0.238 | 0.142 |            |       |     |  |                 |         |
| cg05784193 | 1  | 192,847,589 | 1.08E-08 | 0.238 | 0.270 |            |       |     |  |                 |         |
| cg12858902 | 1  | 110,254,854 | 4.67E-10 | 0.238 | 0.217 |            |       |     |  | <i>GSTM5</i>    | TSS200  |
| cg03200052 | 1  | 223,538,627 | 0.001111 | 0.238 | 0.163 |            |       |     |  | <i>SUSD4</i>    | TSS1500 |
| cg09169874 | 5  | 603,562     | 2.2E-16  | 0.238 | 0.208 |            |       |     |  |                 |         |
| cg16675758 | 11 | 115,531,171 | 1.05E-07 | 0.238 | 0.203 |            |       |     |  |                 |         |
| cg21067652 | 13 | 41,548,815  | 0.000248 | 0.238 | 0.258 |            |       |     |  | <i>ELF1</i>     | Body    |
| cg22025232 | 6  | 29,894,874  | 0.020641 | 0.238 | 0.211 |            |       |     |  | <i>HCG4P6</i>   | TSS1500 |
| cg14671384 | 12 | 47,219,920  | 7.57E-08 | 0.238 | 0.222 |            |       |     |  | <i>SLC38A4</i>  | TSS200  |
| cg08718490 | 4  | 52,943,099  | 0.000655 | 0.238 | 0.243 |            |       |     |  | <i>SPATA18</i>  | Body    |
| cg03983223 | 2  | 175,499,283 | 0.020781 | 0.238 | 0.205 |            |       |     |  | <i>WIPF1</i>    | 1stExon |
| cg06298346 | 5  | 10,565,679  | 5.35E-08 | 0.238 | 0.235 |            |       |     |  | <i>ANKRD33B</i> | Body    |
| cg09599130 | 10 | 104,170,691 | 0.008281 | 0.238 | 0.242 |            |       |     |  | <i>PSD</i>      | Body    |
| cg14072027 | 17 | 15,301,904  | 1.74E-06 | 0.238 | 0.225 |            |       |     |  |                 |         |
| cg15205636 | 13 | 21,520,468  | 3.6E-05  | 0.238 | 0.229 |            |       |     |  |                 |         |
| cg05861567 | 22 | 50,523,686  | 7.51E-11 | 0.238 | 0.226 | 0.00108251 | 0.099 |     |  | <i>MLC1</i>     | 5'UTR   |
| cg08279008 | 2  | 86,263,224  | 0.038526 | 0.238 | 0.360 |            |       |     |  | <i>POLR1A</i>   | Body    |
| cg12860635 | 6  | 30,095,140  | 1.81E-15 | 0.238 | 0.225 |            |       |     |  |                 |         |
| cg24945701 | 3  | 62,362,783  | 7.23E-05 | 0.238 | 0.264 |            |       |     |  |                 |         |
| cg18798922 | 2  | 171,572,863 | 0.03362  | 0.238 | 0.254 |            |       |     |  | <i>SP5</i>      | Body    |
| cg06170683 | 16 | 3,740,774   | 0.000181 | 0.238 | 0.224 |            |       |     |  | <i>TRAP1</i>    | Body    |
| cg16038120 | 14 | 29,235,196  | 0.037051 | 0.238 | 0.162 |            |       |     |  | <i>FOXG1</i>    | TSS1500 |
| cg06407657 | 20 | 43,937,138  | 2.46E-10 | 0.238 | 0.233 |            |       |     |  | <i>MATN4</i>    | TSS200  |
| cg13528344 | 13 | 20,768,138  | 0.01111  | 0.238 | 0.272 |            |       |     |  | <i>GJB2</i>     | TSS1500 |
| cg00050402 | 7  | 55,073,022  | 1.41E-08 | 0.238 | 0.209 |            |       |     |  |                 |         |
| cg06362543 | 20 | 42,135,794  | 1.94E-06 | 0.238 | 0.201 |            |       |     |  |                 |         |

|            |    |             |          |       |       |          |       |     |                  |         |
|------------|----|-------------|----------|-------|-------|----------|-------|-----|------------------|---------|
| cg08195512 | 17 | 71,948,430  | 0.002055 | 0.238 | 0.265 |          |       |     |                  |         |
| cg10069155 | 15 | 41,852,638  | 3E-05    | 0.238 | 0.218 |          |       | Yes | <i>TYRO3</i>     | Body    |
| cg04487296 | 7  | 149,389,669 | 0.007114 | 0.238 | 0.271 |          |       |     |                  |         |
| cg11851804 | 1  | 848,379     | 2.02E-05 | 0.238 | 0.246 |          |       |     |                  |         |
| cg27210464 | 10 | 101,283,479 | 0.049965 | 0.238 | 0.236 |          |       |     |                  |         |
| cg07219769 | 22 | 38,071,455  | 0.00019  | 0.238 | 0.292 |          |       |     | <i>LGALS1</i>    | TSS200  |
| cg08975803 | 12 | 52,626,818  | 1.07E-06 | 0.238 | 0.218 |          |       |     | <i>KRT7</i>      | TSS200  |
| cg13033858 | 12 | 109,248,326 | 5.79E-06 | 0.238 | 0.231 |          |       |     | <i>SSH1</i>      | Body    |
| cg01388757 | 2  | 102,091,195 | 0.002202 | 0.238 | 0.238 |          |       |     | <i>RFX8</i>      | TSS200  |
| cg09557313 | 13 | 53,313,174  | 0.007762 | 0.238 | 0.164 |          |       |     | <i>LECT1</i>     | Body    |
| cg16615357 | 5  | 135,416,594 | 0.00037  | 0.238 | 0.230 |          |       |     | <i>MIR886</i>    | TSS1500 |
| cg07719492 | 8  | 70,983,348  | 0.019104 | 0.238 | 0.252 |          |       |     | <i>PRDM14</i>    | 5'UTR   |
| cg26514793 | 10 | 73,769,127  | 2.34E-08 | 0.238 | 0.237 |          |       |     | <i>CHST3</i>     | 3'UTR   |
| cg26668713 | 11 | 65,405,903  | 0.02401  | 0.238 | 0.169 | 2.41E-08 | 0.124 |     | <i>SIPA1</i>     | 5'UTR   |
| cg00524220 | 19 | 3,098,963   | 4.59E-05 | 0.238 | 0.263 |          |       |     | <i>GNA11</i>     | Body    |
| cg01246617 | 5  | 53,751,493  | 7.59E-30 | 0.238 | 0.242 |          |       |     | <i>HSPB3</i>     | 5'UTR   |
| cg18291437 | X  | 119,445,843 | 3.49E-08 | 0.238 | 0.245 |          |       |     | <i>FAM70A</i>    | TSS1500 |
| cg19785066 | 20 | 44,746,655  | 4.75E-05 | 0.238 | 0.297 |          |       |     | <i>CD40</i>      | TSS1500 |
| cg24392548 | 3  | 46,854,173  | 0.018629 | 0.238 | 0.227 |          |       |     |                  |         |
| cg04567307 | 4  | 48,492,122  | 0.000762 | 0.238 | 0.201 |          |       |     | <i>ZAR1</i>      | TSS200  |
| cg05637536 | 1  | 154,475,068 | 0.000488 | 0.238 | 0.127 |          |       |     | <i>TDRD10</i>    | 5'UTR   |
| cg10779492 | 1  | 106,623,781 | 0.002665 | 0.238 | 0.226 |          |       |     |                  |         |
| cg15927699 | 1  | 37,856,881  | 3.76E-09 | 0.238 | 0.228 |          |       |     |                  |         |
| cg07188513 | 7  | 156,807,474 | 8.98E-06 | 0.238 | 0.225 |          |       |     |                  |         |
| cg12598235 | 15 | 89,921,182  | 4.32E-05 | 0.238 | 0.206 |          |       |     | <i>LOC254559</i> | TSS200  |
| cg25659902 | 6  | 30,652,202  | 7.28E-06 | 0.238 | 0.242 |          |       |     | <i>KIAA1949</i>  | Body    |
| cg00302983 | 13 | 24,007,545  | 0.003728 | 0.238 | 0.162 |          |       |     | <i>SACS</i>      | 5'UTR   |
| cg22976313 | 14 | 105,070,340 | 3.6E-07  | 0.238 | 0.262 |          |       |     | <i>TMEM179</i>   | Body    |
| cg04205034 | 5  | 134,824,947 | 0.009892 | 0.238 | 0.199 |          |       |     |                  |         |
| cg09169117 | 2  | 153,302,353 | 2.13E-06 | 0.238 | 0.240 |          |       |     | <i>FMNL2</i>     | Body    |
| cg11775488 | 10 | 95,586,237  | 0.001554 | 0.238 | 0.254 |          |       |     |                  |         |
| cg20438306 | 4  | 41,747,092  | 0.000151 | 0.238 | 0.238 |          |       |     | <i>PHOX2B</i>    | 3'UTR   |
| cg14983586 | 6  | 27,206,503  | 0.001728 | 0.238 | 0.256 |          |       |     |                  |         |
| cg01077100 | 10 | 124,067,280 | 6.8E-10  | 0.238 | 0.223 |          |       |     | <i>BTBD16</i>    | Body    |



|            |    |             |          |       |       |            |       |  |  |                  |         |
|------------|----|-------------|----------|-------|-------|------------|-------|--|--|------------------|---------|
| cg03155027 | 3  | 49,907,692  | 4.16E-07 | 0.238 | 0.203 |            |       |  |  | <i>CAMKV</i>     | TSS1500 |
| cg05184394 | 2  | 131,512,773 | 1.06E-12 | 0.238 | 0.249 | 3.3E-33    | 0.210 |  |  | <i>FAM123C</i>   | TSS1500 |
| cg09045681 | 6  | 31,127,178  | 2.39E-05 | 0.238 | 0.245 | 1.44E-08   | 0.131 |  |  | <i>TCF19</i>     | 5'UTR   |
| cg14265068 | 17 | 77,763,497  | 2.59E-12 | 0.238 | 0.197 |            |       |  |  |                  |         |
| cg19656282 | 2  | 74,742,786  | 0.033608 | 0.238 | 0.274 |            |       |  |  | <i>TLX2</i>      | Body    |
| cg21880903 | 4  | 39,408,665  | 3.52E-05 | 0.238 | 0.278 | 3.48E-10   | 0.168 |  |  | <i>KLB</i>       | 1stExon |
| cg12166610 | 8  | 31,498,256  | 0.000192 | 0.238 | 0.264 |            |       |  |  | <i>NRG1</i>      | Body    |
| cg18372607 | 11 | 31,827,084  | 0.009517 | 0.238 | 0.267 |            |       |  |  | <i>PAX6</i>      | Body    |
| cg18497508 | 6  | 41,528,345  | 1.94E-06 | 0.238 | 0.222 |            |       |  |  | <i>FOXP4</i>     | 5'UTR   |
| cg19054158 | 7  | 1,099,421   | 0.007229 | 0.238 | 0.257 |            |       |  |  | <i>C7orf50</i>   | Body    |
| cg10298741 | 16 | 73,019,173  | 4.52E-05 | 0.238 | 0.224 |            |       |  |  | <i>ZFHX3</i>     | 5'UTR   |
| cg14538320 | 8  | 22,722,360  | 0.000263 | 0.238 | 0.145 |            |       |  |  | <i>PEBP4</i>     | Body    |
| cg01493517 | 12 | 6,665,447   | 4.29E-05 | 0.238 | 0.226 |            |       |  |  | <i>IFFO1</i>     | TSS1500 |
| cg15287594 | 20 | 42,938,795  | 5.12E-11 | 0.238 | 0.264 |            |       |  |  | <i>FITM2</i>     | Body    |
| cg21394729 | 15 | 31,316,860  | 1.09E-13 | 0.238 | 0.244 |            |       |  |  | <i>TRPM1</i>     | Body    |
| cg21831174 | 3  | 187,011,187 | 3.51E-12 | 0.238 | 0.224 | 0.00091119 | 0.076 |  |  | <i>MASP1</i>     | TSS1500 |
| cg03920442 | 20 | 25,848,969  | 0.002445 | 0.238 | 0.195 |            |       |  |  |                  |         |
| cg04633600 | 5  | 101,632,286 | 0.011854 | 0.238 | 0.197 |            |       |  |  | <i>SLCO4C1</i>   | TSS200  |
| cg00767010 | 9  | 99,482,094  | 0.011911 | 0.238 | 0.235 |            |       |  |  |                  |         |
| cg05940231 | 1  | 119,532,189 | 1.01E-05 | 0.238 | 0.257 |            |       |  |  | <i>TBX15</i>     | TSS200  |
| cg11765312 | 2  | 84,714,510  | 9.31E-05 | 0.238 | 0.173 |            |       |  |  |                  |         |
| cg06657529 | 5  | 783,288     | 0.000975 | 0.238 | 0.268 |            |       |  |  |                  |         |
| cg09905511 | 2  | 77,621,916  | 1.38E-06 | 0.238 | 0.233 |            |       |  |  | <i>LRRTM4</i>    | Body    |
| cg13577076 | 7  | 752,456     | 0.002788 | 0.238 | 0.167 | 1.75E-12   | 0.231 |  |  | <i>PRKAR1B</i>   | 5'UTR   |
| cg22902089 | 11 | 46,318,223  | 3.34E-21 | 0.238 | 0.225 |            |       |  |  | <i>CREB3L1</i>   | Body    |
| cg26541780 | 1  | 156,217,981 | 5.88E-07 | 0.238 | 0.287 |            |       |  |  | <i>PAQR6</i>     | TSS200  |
| cg05016408 | 5  | 150,326,174 | 0.049784 | 0.238 | 0.265 |            |       |  |  | <i>LOC134466</i> | TSS200  |
| cg12598865 | 11 | 2,901,843   | 5.76E-10 | 0.238 | 0.233 |            |       |  |  |                  |         |
| cg13537353 | 13 | 26,586,651  | 0.000191 | 0.238 | 0.196 |            |       |  |  | <i>ATP8A2</i>    | Body    |
| cg10966139 | 1  | 236,228,837 | 0.000842 | 0.238 | 0.195 |            |       |  |  | <i>NID1</i>      | TSS1500 |
| cg23947326 | 19 | 46,504,128  | 0.033529 | 0.238 | 0.152 |            |       |  |  | <i>CCDC61</i>    | Body    |
| cg24924958 | 6  | 142,409,993 | 0.01398  | 0.238 | 0.181 |            |       |  |  | <i>NMBR</i>      | TSS200  |
| cg02634272 | 16 | 71,459,870  | 0.01848  | 0.238 | 0.231 |            |       |  |  |                  |         |
| cg03340026 | 19 | 1,403,530   | 0.000345 | 0.238 | 0.268 |            |       |  |  |                  |         |

|            |    |             |          |       |       |  |  |  |                  |         |
|------------|----|-------------|----------|-------|-------|--|--|--|------------------|---------|
| cg04607865 | 7  | 20,834,362  | 0.001373 | 0.238 | 0.195 |  |  |  |                  |         |
| cg04628438 | 6  | 10,585,889  | 3.79E-08 | 0.238 | 0.228 |  |  |  | <i>GCNT2</i>     | Body    |
| cg07820868 | 1  | 119,528,638 | 0.006615 | 0.238 | 0.253 |  |  |  | <i>TBX15</i>     | 5'UTR   |
| cg22202689 | 19 | 49,298,227  | 7.71E-10 | 0.238 | 0.267 |  |  |  |                  |         |
| cg19906672 | 4  | 6,918,868   | 0.000676 | 0.238 | 0.188 |  |  |  | <i>TBC1D14</i>   | 5'UTR   |
| cg22967542 | 7  | 96,647,483  | 0.000231 | 0.238 | 0.262 |  |  |  |                  |         |
| cg25034155 | 10 | 80,945,359  | 1.18E-05 | 0.238 | 0.227 |  |  |  | <i>ZMIZ1</i>     | 5'UTR   |
| cg03534504 | 5  | 171,594,998 | 4.76E-15 | 0.238 | 0.222 |  |  |  | <i>STK10</i>     | Body    |
| cg21684012 | 6  | 100,912,906 | 0.014537 | 0.238 | 0.302 |  |  |  | <i>SIM1</i>      | TSS1500 |
| cg18893793 | 12 | 47,472,810  | 0.014011 | 0.238 | 0.156 |  |  |  | <i>AMIGO2</i>    | 5'UTR   |
| cg25929533 | 6  | 127,840,616 | 0.015497 | 0.238 | 0.192 |  |  |  | <i>C6orf174</i>  | TSS200  |
| cg04370442 | 16 | 58,019,866  | 1.62E-20 | 0.238 | 0.226 |  |  |  | <i>TEPP</i>      | Body    |
| cg05399718 | 12 | 123,555,535 | 7.64E-15 | 0.238 | 0.246 |  |  |  | <i>PITPNM2</i>   | 5'UTR   |
| cg08636083 | 1  | 149,785,211 | 2.64E-09 | 0.238 | 0.204 |  |  |  | <i>HIST2H2BF</i> | TSS1500 |
| cg09643340 | 11 | 129,244,105 | 6.45E-08 | 0.238 | 0.258 |  |  |  |                  |         |
| cg12894524 | 12 | 116,997,069 | 1.11E-08 | 0.238 | 0.217 |  |  |  | <i>MAP1LC3B2</i> | TSS200  |
| cg15835817 | 3  | 32,433,905  | 8.8E-05  | 0.238 | 0.150 |  |  |  | <i>CMTM7</i>     | Body    |
| cg06103657 | 12 | 33,030,976  | 2.26E-12 | 0.238 | 0.202 |  |  |  | <i>PKP2</i>      | Body    |
| cg23972298 | 1  | 32,665,582  | 0.000121 | 0.238 | 0.166 |  |  |  | <i>CCDC28B</i>   | TSS1500 |
| cg03402235 | 15 | 42,749,336  | 6.82E-08 | 0.238 | 0.193 |  |  |  | <i>ZFP106</i>    | 1stExon |
| cg12848808 | 15 | 68,125,599  | 0.000966 | 0.238 | 0.246 |  |  |  | <i>LBXCOR1</i>   | Body    |
| cg24900983 | 6  | 152,128,528 | 0.000578 | 0.238 | 0.178 |  |  |  | <i>ESR1</i>      | TSS1500 |
| cg25714956 | 7  | 70,096,264  | 1.2E-09  | 0.238 | 0.228 |  |  |  | <i>AUTS2</i>     | Body    |
| cg02116953 | 20 | 20,346,166  | 0.032469 | 0.238 | 0.188 |  |  |  |                  |         |
| cg25642476 | 6  | 29,595,011  | 7.91E-08 | 0.238 | 0.241 |  |  |  | <i>GABBR1</i>    | Body    |
| cg08318842 | 16 | 55,512,806  | 8.23E-07 | 0.238 | 0.226 |  |  |  | <i>MMP2</i>      | TSS1500 |
| cg17543296 | 1  | 20,880,378  | 0.005401 | 0.238 | 0.129 |  |  |  | <i>FAM43B</i>    | 1stExon |
| cg09720573 | 12 | 110,150,261 | 3.75E-10 | 0.238 | 0.232 |  |  |  |                  |         |
| cg16353624 | 6  | 74,160,974  | 0.013148 | 0.237 | 0.129 |  |  |  | <i>C6orf150</i>  | Body    |
| cg18668813 | 6  | 114,177,341 | 0.020395 | 0.237 | 0.178 |  |  |  | <i>MARCKS</i>    | TSS1500 |
| cg21661379 | 2  | 228,324,983 | 6E-16    | 0.237 | 0.239 |  |  |  |                  |         |
| cg10970143 | 1  | 159,866,558 | 3.44E-05 | 0.237 | 0.210 |  |  |  | <i>CCDC19</i>    | Body    |
| cg11111460 | 4  | 183,063,637 | 6.05E-05 | 0.237 | 0.217 |  |  |  | <i>MGC45800</i>  | Body    |
| cg15920887 | 2  | 190,928,430 | 1.4E-07  | 0.237 | 0.240 |  |  |  | <i>MSTN</i>      | TSS1500 |

|            |    |             |          |       |       |  |  |  |                  |         |
|------------|----|-------------|----------|-------|-------|--|--|--|------------------|---------|
| cg17347104 | 14 | 75,034,677  | 1.32E-08 | 0.237 | 0.230 |  |  |  | <i>LTBP2</i>     | Body    |
| cg05734722 | 2  | 85,122,547  | 0.033438 | 0.237 | 0.105 |  |  |  |                  |         |
| cg19779166 | 14 | 56,890,696  | 0.000134 | 0.237 | 0.241 |  |  |  |                  |         |
| cg21211271 | 1  | 6,265,071   | 0.006372 | 0.237 | 0.245 |  |  |  | <i>RNF207</i>    | TSS1500 |
| cg05116382 | 11 | 66,327,000  | 0.000101 | 0.237 | 0.269 |  |  |  | <i>ACTN3</i>     | Body    |
| cg24909660 | 11 | 47,276,469  | 0.000125 | 0.237 | 0.169 |  |  |  | <i>NR1H3</i>     | 5'UTR   |
| cg19984911 | 5  | 150,020,338 | 2.34E-06 | 0.237 | 0.238 |  |  |  | <i>SYNPO</i>     | 1stExon |
| cg19910201 | 7  | 64,734,691  | 0.00145  | 0.237 | 0.275 |  |  |  |                  |         |
| cg19876672 | 10 | 118,891,266 | 0.006463 | 0.237 | 0.230 |  |  |  | <i>VAX1</i>      | 3'UTR   |
| cg12406726 | 1  | 162,792,568 | 0.027313 | 0.237 | 0.328 |  |  |  |                  |         |
| cg11854259 | 7  | 155,325,815 | 0.000313 | 0.237 | 0.235 |  |  |  | <i>CNPY1</i>     | 5'UTR   |
| cg10927449 | 2  | 63,286,621  | 1.15E-06 | 0.237 | 0.220 |  |  |  |                  |         |
| cg19014941 | 10 | 88,127,363  | 0.003915 | 0.237 | 0.125 |  |  |  | <i>GRID1</i>     | TSS1500 |
| cg07234865 | 1  | 156,390,220 | 0.000183 | 0.237 | 0.337 |  |  |  | <i>MIR9-1</i>    | Body    |
| cg16596367 | 16 | 89,070,757  | 0.003903 | 0.237 | 0.145 |  |  |  |                  |         |
| cg17816357 | 7  | 124,430,776 | 0.001429 | 0.237 | 0.264 |  |  |  |                  |         |
| cg18378551 | 11 | 84,844,436  | 5.94E-08 | 0.237 | 0.233 |  |  |  | <i>DLG2</i>      | Body    |
| cg25960038 | 17 | 46,667,789  | 1.53E-12 | 0.237 | 0.218 |  |  |  | <i>LOC404266</i> | TSS200  |
| cg00339682 | 4  | 13,531,163  | 0.013757 | 0.237 | 0.315 |  |  |  |                  |         |
| cg00994250 | 6  | 151,087,821 | 1.64E-07 | 0.237 | 0.237 |  |  |  | <i>PLEKHG1</i>   | Body    |
| cg06005197 | 11 | 58,612,853  | 9.38E-06 | 0.237 | 0.230 |  |  |  | <i>GLYATL2</i>   | TSS1500 |
| cg10556772 | 6  | 29,795,434  | 8.96E-08 | 0.237 | 0.231 |  |  |  | <i>HLA-G</i>     | 5'UTR   |
| cg16426482 | 16 | 21,831,587  | 0.04417  | 0.237 | 0.058 |  |  |  | <i>RRN3P1</i>    | TSS1500 |
| cg24368031 | 17 | 60,726,097  | 0.007007 | 0.237 | 0.302 |  |  |  | <i>MRC2</i>      | Body    |
| cg05680973 | X  | 132,090,141 | 3.67E-06 | 0.237 | 0.213 |  |  |  | <i>HS6ST2</i>    | Body    |
| cg06613480 | 3  | 181,437,383 | 0.002369 | 0.237 | 0.347 |  |  |  | <i>SOX2OT</i>    | Body    |
| cg00961640 | 1  | 110,933,767 | 4.43E-10 | 0.237 | 0.234 |  |  |  | <i>SLC16A4</i>   | TSS200  |
| cg13426138 | 6  | 31,830,455  | 0.045187 | 0.237 | 0.197 |  |  |  | <i>NEU1</i>      | 1stExon |
| cg00767000 | 16 | 87,525,307  | 3.53E-07 | 0.237 | 0.260 |  |  |  | <i>ZCCHC14</i>   | 1stExon |
| cg04428826 | X  | 75,649,367  | 1.43E-23 | 0.237 | 0.228 |  |  |  | <i>MAGEE1</i>    | 1stExon |
| cg12979844 | 13 | 46,425,929  | 0.004695 | 0.237 | 0.190 |  |  |  | <i>SIAH3</i>     | TSS200  |
| cg14855931 | 3  | 138,631,456 | 0.001306 | 0.237 | 0.261 |  |  |  |                  |         |
| cg19200589 | 21 | 36,041,605  | 0.000469 | 0.237 | 0.229 |  |  |  | <i>CLIC6</i>     | TSS200  |
| cg18226915 | 11 | 126,009,830 | 1.1E-20  | 0.237 | 0.236 |  |  |  |                  |         |

|            |    |             |          |       |       |  |  |     |                 |         |
|------------|----|-------------|----------|-------|-------|--|--|-----|-----------------|---------|
| cg01388260 | 16 | 85,399,742  | 2.86E-17 | 0.237 | 0.230 |  |  |     |                 |         |
| cg19656974 | 2  | 66,653,415  | 1.94E-05 | 0.237 | 0.233 |  |  |     |                 |         |
| cg25630910 | 12 | 123,753,186 | 2.3E-05  | 0.237 | 0.142 |  |  |     | <i>CDK2AP1</i>  | Body    |
| cg12010198 | 8  | 145,939,499 | 3.38E-05 | 0.237 | 0.211 |  |  |     |                 |         |
| cg07606384 | 10 | 94,823,251  | 2.9E-05  | 0.237 | 0.205 |  |  |     | <i>CYP26C1</i>  | Body    |
| cg11869049 | 3  | 48,278,910  | 0.001072 | 0.237 | 0.288 |  |  |     |                 |         |
| cg20712631 | 5  | 172,074,065 | 2.69E-11 | 0.237 | 0.233 |  |  |     | <i>NEURL1B</i>  | Body    |
| cg10532489 | 16 | 29,888,304  | 0.000005 | 0.237 | 0.232 |  |  |     | <i>SEZ6L2</i>   | Body    |
| cg11205636 | 5  | 107,108,407 | 1.05E-10 | 0.237 | 0.251 |  |  |     |                 |         |
| cg15500865 | 7  | 95,025,924  | 0.000277 | 0.237 | 0.208 |  |  |     | <i>PON3</i>     | TSS1500 |
| cg07929768 | 2  | 232,055,508 | 0.000697 | 0.237 | 0.256 |  |  |     |                 |         |
| cg11042214 | 10 | 102,906,231 | 2.82E-05 | 0.237 | 0.271 |  |  |     |                 |         |
| cg14219620 | 6  | 151,561,168 | 0.000937 | 0.237 | 0.129 |  |  | Yes | <i>AKAP12</i>   | 1stExon |
| cg05892568 | 19 | 30,015,782  | 0.000979 | 0.237 | 0.180 |  |  |     |                 |         |
| cg03132556 | 12 | 54,366,760  | 0.00261  | 0.237 | 0.242 |  |  |     | <i>HOXC11</i>   | TSS200  |
| cg12542255 | 19 | 45,976,195  | 2.36E-05 | 0.237 | 0.156 |  |  |     | <i>FOSB</i>     | Body    |
| cg20067049 | 2  | 121,345,149 | 2.38E-09 | 0.237 | 0.229 |  |  |     |                 |         |
| cg07999845 | 4  | 154,710,961 | 0.025074 | 0.237 | 0.360 |  |  |     | <i>SFRP2</i>    | TSS1500 |
| cg16379462 | 14 | 55,119,082  | 2.56E-08 | 0.237 | 0.249 |  |  |     | <i>SAMD4A</i>   | Body    |
| cg04209913 | 5  | 37,836,246  | 5.4E-15  | 0.237 | 0.236 |  |  |     | <i>GDNF</i>     | TSS1500 |
| cg04422990 | 6  | 137,241,923 | 3.82E-06 | 0.237 | 0.236 |  |  |     | <i>SLC35D3</i>  | TSS1500 |
| cg05961294 | 2  | 45,028,264  | 1.71E-06 | 0.237 | 0.219 |  |  |     |                 |         |
| cg13571460 | 9  | 124,989,337 | 6.53E-05 | 0.237 | 0.257 |  |  |     | <i>LHX6</i>     | Body    |
| cg19209066 | 10 | 8,085,349   | 0.003531 | 0.237 | 0.280 |  |  |     |                 |         |
| cg24051242 | 11 | 68,096,138  | 1.31E-10 | 0.237 | 0.182 |  |  |     | <i>LRP5</i>     | Body    |
| cg18485596 | 6  | 111,435,084 | 2.89E-06 | 0.237 | 0.269 |  |  |     | <i>SLC16A10</i> | Body    |
| cg19911329 | 6  | 29,975,345  | 3.25E-14 | 0.237 | 0.235 |  |  |     | <i>HLA-J</i>    | Body    |
| cg02523640 | 10 | 129,534,613 | 0.00339  | 0.237 | 0.229 |  |  |     | <i>FOXI2</i>    | TSS1500 |
| cg08823209 | 19 | 35,611,675  | 3.91E-05 | 0.237 | 0.233 |  |  |     | <i>FXYD3</i>    | Body    |
| cg01128482 | 2  | 177,028,621 | 0.00829  | 0.237 | 0.251 |  |  |     | <i>HOXD3</i>    | TSS200  |
| cg21865845 | 3  | 79,815,848  | 7.76E-05 | 0.237 | 0.189 |  |  |     | <i>ROBO1</i>    | 5'UTR   |
| cg00889398 | 13 | 28,502,089  | 0.002083 | 0.237 | 0.213 |  |  |     |                 |         |
| cg09385692 | 5  | 180,597,400 | 0.000939 | 0.237 | 0.271 |  |  |     |                 |         |
| cg26158279 | 20 | 25,565,667  | 0.022914 | 0.237 | 0.112 |  |  |     | <i>NINL</i>     | 5'UTR   |

|            |    |             |          |       |       |  |  |     |                 |         |
|------------|----|-------------|----------|-------|-------|--|--|-----|-----------------|---------|
| cg25755575 | 1  | 217,311,531 | 2.67E-05 | 0.237 | 0.238 |  |  |     | <i>ESRRG</i>    | TSS1500 |
| cg22706186 | 3  | 68,053,371  | 0.012835 | 0.237 | 0.268 |  |  |     | <i>FAM19A1</i>  | TSS200  |
| cg23007665 | 7  | 43,690,247  | 3.17E-09 | 0.237 | 0.241 |  |  |     | <i>C7orf44</i>  | 5'UTR   |
| cg08469845 | 17 | 39,676,096  | 7.81E-08 | 0.237 | 0.224 |  |  |     | <i>KRT15</i>    | TSS1500 |
| cg09408917 | 21 | 38,069,321  | 0.006114 | 0.237 | 0.261 |  |  |     |                 |         |
| cg07434457 | 2  | 220,222,765 | 3.44E-06 | 0.237 | 0.237 |  |  |     |                 |         |
| cg09816693 | 14 | 74,706,113  | 1.2E-06  | 0.237 | 0.226 |  |  |     | <i>VSX2</i>     | TSS200  |
| cg14977608 | 1  | 55,506,512  | 0.00149  | 0.237 | 0.221 |  |  |     | <i>PCSK9</i>    | Body    |
| cg02973792 | 12 | 117,408,122 | 3.3E-42  | 0.237 | 0.228 |  |  | Yes | <i>FBXW8</i>    | Body    |
| cg02923831 | 8  | 38,386,436  | 2.9E-06  | 0.237 | 0.254 |  |  |     | <i>C8orf86</i>  | TSS1500 |
| cg12775181 | 7  | 1,284,732   | 3.26E-06 | 0.237 | 0.208 |  |  |     |                 |         |
| cg17037355 | 20 | 3,218,545   | 5.3E-17  | 0.237 | 0.217 |  |  |     | <i>SLC4A11</i>  | TSS200  |
| cg25399367 | 6  | 146,136,238 | 0.017603 | 0.237 | 0.139 |  |  |     | <i>FBXO30</i>   | TSS1500 |
| cg12175311 | 15 | 100,538,092 | 3.53E-13 | 0.237 | 0.207 |  |  |     | <i>ADAMTS17</i> | Body    |
| cg13711424 | 14 | 65,017,091  | 1.91E-08 | 0.237 | 0.216 |  |  |     | <i>C14orf50</i> | Body    |
| cg18433784 | 21 | 48,025,155  | 1.27E-08 | 0.237 | 0.209 |  |  |     | <i>S100B</i>    | TSS200  |
| cg22839531 | 6  | 91,123,560  | 0.000738 | 0.237 | 0.196 |  |  |     |                 |         |
| cg13902210 | 1  | 110,754,436 | 1.75E-05 | 0.237 | 0.240 |  |  |     | <i>KCNC4</i>    | 1stExon |
| cg18179931 | 3  | 194,119,058 | 3.56E-05 | 0.237 | 0.216 |  |  |     | <i>GP5</i>      | 5'UTR   |
| cg01298991 | 2  | 20,422,849  | 3.49E-08 | 0.237 | 0.190 |  |  |     | <i>SDC1</i>     | Body    |
| cg21209859 | 1  | 167,682,516 | 9.96E-11 | 0.237 | 0.201 |  |  |     |                 |         |
| cg06003986 | 18 | 35,104,868  | 0.002677 | 0.237 | 0.203 |  |  |     | <i>BRUNOL4</i>  | Body    |
| cg05950572 | 11 | 14,004,854  | 0.000771 | 0.237 | 0.217 |  |  |     | <i>SPON1</i>    | Body    |
| cg07981266 | 6  | 30,720,311  | 0.00248  | 0.237 | 0.137 |  |  | Yes |                 |         |
| cg17771652 | 5  | 82,767,968  | 0.007073 | 0.237 | 0.309 |  |  |     | <i>VCAN</i>     | 5'UTR   |
| cg22178613 | 4  | 154,710,499 | 0.008521 | 0.237 | 0.299 |  |  |     | <i>SFRP2</i>    | TSS1500 |
| cg22881652 | 4  | 13,532,951  | 0.013101 | 0.237 | 0.340 |  |  |     |                 |         |
| cg01857475 | 12 | 104,697,193 | 0.018679 | 0.237 | 0.180 |  |  |     | <i>TXNRD1</i>   | 5'UTR   |
| cg07847273 | 3  | 43,195,345  | 1.39E-13 | 0.237 | 0.237 |  |  |     |                 |         |
| cg07892597 | 1  | 119,532,093 | 2.37E-08 | 0.237 | 0.219 |  |  |     | <i>TBX15</i>    | 1stExon |
| cg14314071 | 17 | 15,165,812  | 0.002952 | 0.237 | 0.223 |  |  |     | <i>PMP22</i>    | 5'UTR   |
| cg21099148 | 17 | 36,611,691  | 1.18E-06 | 0.237 | 0.193 |  |  |     |                 |         |
| cg11323985 | 8  | 18,541,497  | 0.000616 | 0.237 | 0.181 |  |  |     | <i>PSD3</i>     | Body    |
| cg24167422 | 1  | 9,243,600   | 3.64E-06 | 0.237 | 0.225 |  |  |     |                 |         |

|            |    |             |          |       |       |          |       |  |  |                  |         |
|------------|----|-------------|----------|-------|-------|----------|-------|--|--|------------------|---------|
| cg25431463 | 20 | 36,012,946  | 5.32E-06 | 0.237 | 0.253 |          |       |  |  | <i>SRC</i>       | Body    |
| cg19773546 | 17 | 45,944,339  | 5.42E-18 | 0.237 | 0.221 |          |       |  |  |                  |         |
| cg25212090 | 1  | 197,882,170 | 0.003821 | 0.237 | 0.220 |          |       |  |  | <i>LHX9</i>      | Body    |
| cg01295782 | 3  | 71,739,283  | 1.67E-23 | 0.237 | 0.245 |          |       |  |  | <i>EIF4E3</i>    | Body    |
| cg01521274 | 14 | 71,822,452  | 0.002179 | 0.237 | 0.203 |          |       |  |  |                  |         |
| cg02857760 | 2  | 177,012,562 | 1.43E-06 | 0.237 | 0.194 |          |       |  |  |                  |         |
| cg05874561 | 4  | 154,709,828 | 0.010402 | 0.237 | 0.277 |          |       |  |  | <i>SFRP2</i>     | 1stExon |
| cg24033224 | 12 | 131,438,016 | 1.42E-09 | 0.237 | 0.243 |          |       |  |  | <i>GPR133</i>    | TSS1500 |
| cg25826546 | 7  | 100,770,060 | 0.013799 | 0.237 | 0.231 |          |       |  |  | <i>SERPINE1</i>  | TSS1500 |
| cg09627520 | 3  | 58,410,836  | 6.31E-07 | 0.237 | 0.272 |          |       |  |  | <i>PXK</i>       | 3'UTR   |
| cg14600877 | 17 | 78,922,220  | 1.61E-05 | 0.237 | 0.210 |          |       |  |  | <i>RPTOR</i>     | Body    |
| cg24341611 | 17 | 50,235,279  | 0.018554 | 0.237 | 0.255 |          |       |  |  | <i>CA10</i>      | 1stExon |
| cg12583095 | 10 | 92,618,141  | 0.00779  | 0.237 | 0.087 |          |       |  |  | <i>HTR7</i>      | TSS1500 |
| cg23695990 | 12 | 95,967,811  | 9E-10    | 0.237 | 0.221 |          |       |  |  |                  |         |
| cg24908198 | 11 | 128,812,992 | 0.002639 | 0.237 | 0.151 |          |       |  |  | <i>TP53AIP1</i>  | TSS200  |
| cg14473030 | 9  | 119,336,987 | 0.00067  | 0.237 | 0.212 |          |       |  |  | <i>ASTN2</i>     | Body    |
| cg17349389 | 2  | 80,530,770  | 0.00824  | 0.237 | 0.270 |          |       |  |  | <i>CTNNA2</i>    | Body    |
| cg09416188 | 3  | 49,538,552  | 0.000689 | 0.237 | 0.206 |          |       |  |  | <i>DAG1</i>      | 5'UTR   |
| cg12224030 | 17 | 48,047,608  | 1.27E-05 | 0.237 | 0.260 |          |       |  |  | <i>DLX4</i>      | Body    |
| cg17346952 | 12 | 57,630,107  | 4.09E-07 | 0.237 | 0.242 |          |       |  |  | <i>NDUFA4L2</i>  | Body    |
| cg04697454 | 15 | 93,633,408  | 9.34E-05 | 0.237 | 0.242 |          |       |  |  | <i>RGMA</i>      | TSS1500 |
| cg18969232 | 2  | 45,156,937  | 4.71E-05 | 0.237 | 0.204 |          |       |  |  |                  |         |
| cg01310750 | 19 | 52,996,548  | 2.37E-05 | 0.237 | 0.202 |          |       |  |  | <i>ZNF578</i>    | 5'UTR   |
| cg03107235 | 13 | 26,586,713  | 0.000245 | 0.237 | 0.233 |          |       |  |  | <i>ATP8A2</i>    | Body    |
| cg21670944 | 8  | 144,962,931 | 2.13E-14 | 0.237 | 0.248 |          |       |  |  |                  |         |
| cg00134602 | 3  | 64,251,663  | 9.05E-05 | 0.237 | 0.260 |          |       |  |  |                  |         |
| cg02469095 | 8  | 99,960,921  | 7.31E-07 | 0.237 | 0.234 |          |       |  |  | <i>OSR2</i>      | 5'UTR   |
| cg09992184 | 1  | 118,151,821 | 7.07E-05 | 0.237 | 0.230 |          |       |  |  | <i>FAM46C</i>    | 5'UTR   |
| cg18771512 | X  | 153,532,633 | 3.31E-12 | 0.237 | 0.251 |          |       |  |  | <i>TKTL1</i>     | TSS1500 |
| cg06873316 | 11 | 20,690,682  | 0.015648 | 0.237 | 0.143 |          |       |  |  | <i>NELL1</i>     | TSS1500 |
| cg02791331 | 3  | 183,993,724 | 0.008568 | 0.237 | 0.210 |          |       |  |  | <i>ECE2</i>      | TSS200  |
| cg03885399 | 1  | 47,691,550  | 3.72E-05 | 0.237 | 0.253 |          |       |  |  | <i>TAL1</i>      | Body    |
| cg17775490 | 20 | 45,179,354  | 5.1E-07  | 0.237 | 0.217 |          |       |  |  | <i>C20orf123</i> | TSS200  |
| cg03662459 | 9  | 34,654,290  | 8.93E-31 | 0.237 | 0.223 | 5.64E-10 | 0.079 |  |  | <i>IL11RA</i>    | 5'UTR   |

|            |    |             |          |       |       |          |       |  |                 |         |
|------------|----|-------------|----------|-------|-------|----------|-------|--|-----------------|---------|
| cg07576931 | 8  | 117,530,081 | 1.83E-07 | 0.237 | 0.204 |          |       |  |                 |         |
| cg14400292 | 22 | 46,367,203  | 0.00164  | 0.237 | 0.182 |          |       |  | <i>WNT7B</i>    | Body    |
| cg16935980 | 7  | 155,255,310 | 0.014891 | 0.237 | 0.247 |          |       |  | <i>EN2</i>      | Body    |
| cg04728296 | 4  | 166,414,646 | 2.52E-05 | 0.237 | 0.276 |          |       |  | <i>CPE</i>      | Body    |
| cg05337681 | 15 | 58,844,500  | 1.66E-08 | 0.237 | 0.237 |          |       |  | <i>LIPC</i>     | Body    |
| cg06142351 | 2  | 8,683,945   | 8.71E-07 | 0.237 | 0.219 |          |       |  |                 |         |
| cg15822765 | 6  | 28,956,387  | 2.79E-05 | 0.237 | 0.237 |          |       |  |                 |         |
| cg15146752 | 1  | 16,482,767  | 1.88E-05 | 0.237 | 0.147 | 1.64E-41 | 0.262 |  | <i>EPHA2</i>    | TSS1500 |
| cg00191052 | X  | 46,432,770  | 1.22E-20 | 0.237 | 0.231 | 1.4E-10  | 0.103 |  | <i>CHST7</i>    | TSS1500 |
| cg09455225 | X  | 133,684,399 | 0.033647 | 0.236 | 0.181 |          |       |  |                 |         |
| cg01201797 | 2  | 208,635,605 | 1.02E-06 | 0.236 | 0.233 |          |       |  | <i>FZD5</i>     | TSS1500 |
| cg16087412 | 17 | 21,281,017  | 2.62E-09 | 0.236 | 0.239 |          |       |  | <i>KCNJ12</i>   | 5'UTR   |
| cg06326971 | 16 | 57,836,692  | 0.000634 | 0.236 | 0.197 |          |       |  | <i>KIFC3</i>    | TSS1500 |
| cg07421596 | 6  | 31,913,770  | 3E-05    | 0.236 | 0.221 |          |       |  | <i>CFB</i>      | 1stExon |
| cg24425727 | 6  | 36,645,648  | 0.000429 | 0.236 | 0.292 |          |       |  | <i>CDKN1A</i>   | TSS1500 |
| cg07776419 | X  | 133,680,476 | 0.005704 | 0.236 | 0.155 |          |       |  | <i>MGC16121</i> | Body    |
| cg18075666 | 7  | 134,550,430 | 4.34E-06 | 0.236 | 0.235 |          |       |  | <i>CALD1</i>    | 5'UTR   |
| cg24465685 | 1  | 47,009,809  | 0.028799 | 0.236 | 0.313 |          |       |  |                 |         |
| cg02170525 | 2  | 87,018,382  | 0.00012  | 0.236 | 0.168 | 3.11E-15 | 0.121 |  | <i>CD8A</i>     | 5'UTR   |
| cg07713493 | 1  | 205,473,393 | 2.49E-16 | 0.236 | 0.218 | 2.2E-12  | 0.133 |  | <i>CDK18</i>    | TSS1500 |
| cg16602460 | 6  | 32,156,071  | 1.86E-16 | 0.236 | 0.227 |          |       |  | <i>PBX2</i>     | Body    |
| cg24914185 | 2  | 200,663,789 | 8.81E-15 | 0.236 | 0.208 |          |       |  |                 |         |
| cg05527785 | 17 | 46,656,543  | 0.002544 | 0.236 | 0.154 |          |       |  | <i>HOXB4</i>    | TSS1500 |
| cg15874872 | 7  | 100,770,434 | 0.000394 | 0.236 | 0.287 |          |       |  | <i>SERPINE1</i> | 5'UTR   |
| cg18687675 | 14 | 95,234,965  | 3.1E-05  | 0.236 | 0.250 |          |       |  | <i>GSC</i>      | Body    |
| cg00339782 | 1  | 149,908,099 | 3.31E-16 | 0.236 | 0.228 |          |       |  | <i>MTMR11</i>   | Body    |
| cg10937302 | 11 | 33,037,916  | 2.08E-05 | 0.236 | 0.258 |          |       |  | <i>DEPDC7</i>   | 5'UTR   |
| cg13740815 | 19 | 51,170,356  | 0.016868 | 0.236 | 0.225 |          |       |  | <i>SHANK1</i>   | Body    |
| cg06495184 | 19 | 406,256     | 3.35E-14 | 0.236 | 0.216 |          |       |  | <i>C2CD4C</i>   | 3'UTR   |
| cg07930539 | 2  | 177,025,975 | 0.000325 | 0.236 | 0.179 |          |       |  |                 |         |
| cg26690742 | 11 | 2,889,602   | 7.37E-12 | 0.236 | 0.226 |          |       |  |                 |         |
| cg10345920 | 8  | 23,560,319  | 0.006334 | 0.236 | 0.178 |          |       |  | <i>NKX2-6</i>   | Body    |
| cg19893751 | 2  | 45,029,285  | 1.28E-06 | 0.236 | 0.215 |          |       |  |                 |         |
| cg19928046 | 5  | 149,792,249 | 0.030424 | 0.236 | 0.087 | 3.16E-11 | 0.127 |  | <i>CD74</i>     | 1stExon |

|            |    |             |          |       |       |          |       |  |                 |         |
|------------|----|-------------|----------|-------|-------|----------|-------|--|-----------------|---------|
| cg27357306 | 10 | 63,657,059  | 4.44E-05 | 0.236 | 0.240 |          |       |  |                 |         |
| cg05033333 | 16 | 3,222,180   | 0.039994 | 0.236 | 0.165 |          |       |  |                 |         |
| cg06710596 | 19 | 36,024,279  | 0.000377 | 0.236 | 0.249 |          |       |  | <i>GAPDH5</i>   | TSS200  |
| cg14411503 | 14 | 103,589,028 | 2.42E-07 | 0.236 | 0.208 |          |       |  |                 |         |
| cg21127735 | 17 | 47,547,353  | 0.00068  | 0.236 | 0.209 |          |       |  |                 |         |
| cg25125652 | X  | 110,039,604 | 0.007313 | 0.236 | 0.087 |          |       |  | <i>CHRD1</i>    | TSS1500 |
| cg11193342 | 12 | 116,872,185 | 1.14E-06 | 0.236 | 0.175 |          |       |  |                 |         |
| cg15487498 | 1  | 230,372,938 | 2.4E-13  | 0.236 | 0.242 |          |       |  | <i>GALNT2</i>   | Body    |
| cg21165064 | 1  | 156,402,678 | 4.89E-06 | 0.236 | 0.244 |          |       |  |                 |         |
| cg26856924 | 1  | 119,542,573 | 8.51E-09 | 0.236 | 0.243 |          |       |  |                 |         |
| cg01946191 | 12 | 54,444,463  | 0.000953 | 0.236 | 0.155 |          |       |  | <i>HOXC4</i>    | 5'UTR   |
| cg26612165 | 1  | 181,059,499 | 0.036658 | 0.236 | 0.121 |          |       |  | <i>IER5</i>     | 3'UTR   |
| cg09684846 | 16 | 10,912,718  | 5.64E-12 | 0.236 | 0.228 |          |       |  | <i>FAM18A</i>   | TSS200  |
| cg23886978 | 8  | 1,272,628   | 2.12E-05 | 0.236 | 0.254 |          |       |  |                 |         |
| cg25840237 | 15 | 29,967,593  | 3.64E-28 | 0.236 | 0.209 |          |       |  |                 |         |
| cg05392323 | 1  | 23,698,143  | 1.1E-06  | 0.236 | 0.212 |          |       |  | <i>C1orf213</i> | 3'UTR   |
| cg07058377 | 17 | 2,041,773   | 1.65E-05 | 0.236 | 0.166 |          |       |  | <i>SMG6</i>     | Body    |
| cg07722360 | 20 | 17,691,454  | 4.4E-12  | 0.236 | 0.214 |          |       |  | <i>BANF2</i>    | 5'UTR   |
| cg09664550 | 10 | 33,294,358  | 0.000365 | 0.236 | 0.238 |          |       |  |                 |         |
| cg23675930 | 1  | 26,054,700  | 2.23E-16 | 0.236 | 0.230 |          |       |  | <i>MAN1C1</i>   | Body    |
| cg06452665 | 13 | 43,148,436  | 1.65E-09 | 0.236 | 0.238 |          |       |  | <i>TNFSF11</i>  | 1stExon |
| cg08239804 | 6  | 134,497,755 | 1.65E-09 | 0.236 | 0.247 |          |       |  | <i>SGK1</i>     | TSS1500 |
| cg25102370 | 4  | 174,451,141 | 0.000184 | 0.236 | 0.296 |          |       |  | <i>HAND2</i>    | 5'UTR   |
| cg04349243 | 10 | 91,295,159  | 0.012072 | 0.236 | 0.267 |          |       |  | <i>SLC16A12</i> | 5'UTR   |
| cg06047587 | 3  | 117,118,875 | 3.09E-10 | 0.236 | 0.258 |          |       |  |                 |         |
| cg10741760 | 1  | 19,992,024  | 0.004932 | 0.236 | 0.183 | 1.86E-15 | 0.196 |  | <i>HTR6</i>     | 5'UTR   |
| cg23783862 | 8  | 82,658,145  | 2.24E-14 | 0.236 | 0.245 |          |       |  | <i>CHMP4C</i>   | Body    |
| cg26646659 | 5  | 55,776,364  | 2.97E-07 | 0.236 | 0.155 |          |       |  |                 |         |
| cg07205883 | 10 | 116,187,407 | 2.05E-14 | 0.236 | 0.237 |          |       |  |                 |         |
| cg10319893 | 13 | 37,248,953  | 0.005889 | 0.236 | 0.214 |          |       |  | <i>C13orf36</i> | 5'UTR   |
| cg26229752 | 10 | 131,697,345 | 0.018617 | 0.236 | 0.171 |          |       |  | <i>EBF3</i>     | Body    |
| cg22573003 | X  | 15,402,648  | 2.09E-06 | 0.236 | 0.205 |          |       |  | <i>FIGF</i>     | TSS200  |
| cg26618965 | 8  | 67,874,206  | 0.007393 | 0.236 | 0.109 |          |       |  |                 |         |
| cg09820101 | 1  | 162,792,092 | 5.97E-07 | 0.236 | 0.238 |          |       |  |                 |         |



|            |    |             |          |       |       |          |       |  |                  |         |
|------------|----|-------------|----------|-------|-------|----------|-------|--|------------------|---------|
| cg03490331 | 5  | 172,672,817 | 1.15E-08 | 0.236 | 0.220 |          |       |  |                  |         |
| cg23520688 | 14 | 103,294,740 | 9.09E-14 | 0.236 | 0.211 |          |       |  | <i>TRAF3</i>     | 5'UTR   |
| cg26750742 | 2  | 209,054,670 | 2.88E-10 | 0.236 | 0.236 |          |       |  | <i>C2orf80</i>   | 5'UTR   |
| cg13164157 | 4  | 16,085,180  | 0.014842 | 0.236 | 0.340 |          |       |  | <i>PROM1</i>     | 5'UTR   |
| cg08068820 | 19 | 11,530,021  | 0.001778 | 0.236 | 0.229 |          |       |  | <i>RGL3</i>      | TSS200  |
| cg26847866 | 8  | 27,492,077  | 3.7E-11  | 0.236 | 0.223 | 2.98E-29 | 0.146 |  | <i>SCARA3</i>    | Body    |
| cg16722931 | 17 | 75,312,494  | 1.9E-17  | 0.236 | 0.222 |          |       |  | <i>SEPT9</i>     | 5'UTR   |
| cg03261800 | 9  | 36,985,761  | 9.6E-06  | 0.236 | 0.240 |          |       |  | <i>PAX5</i>      | Body    |
| cg19457477 | 19 | 39,108,609  | 0.020783 | 0.236 | 0.225 |          |       |  | <i>MAP4K1</i>    | 1stExon |
| cg03402605 | 10 | 134,257,269 | 0.000777 | 0.236 | 0.270 |          |       |  | <i>C10orf91</i>  | TSS1500 |
| cg04850999 | 10 | 77,872,084  | 4.77E-07 | 0.236 | 0.215 |          |       |  | <i>C10orf11</i>  | Body    |
| cg12758082 | 13 | 113,407,769 | 0.000232 | 0.236 | 0.123 |          |       |  | <i>ATP11A</i>    | Body    |
| cg02028339 | 6  | 125,991,844 | 1.28E-08 | 0.236 | 0.236 |          |       |  |                  |         |
| cg03277049 | 3  | 156,534,076 | 1.41E-05 | 0.236 | 0.265 |          |       |  |                  |         |
| cg15989926 | 12 | 124,607,875 | 8.46E-30 | 0.236 | 0.234 |          |       |  |                  |         |
| cg21219903 | 1  | 43,920,090  | 0.006363 | 0.236 | 0.225 |          |       |  | <i>HYI</i>       | TSS200  |
| cg26953640 | 17 | 1,174,473   | 0.000515 | 0.236 | 0.273 |          |       |  | <i>BHLHA9</i>    | 1stExon |
| cg01704698 | 16 | 84,941,294  | 2.68E-05 | 0.236 | 0.196 |          |       |  | <i>CRISPLD2</i>  | 3'UTR   |
| cg18561261 | 7  | 123,284,476 | 2.44E-12 | 0.236 | 0.226 |          |       |  |                  |         |
| cg12284382 | 22 | 35,940,438  | 1.91E-06 | 0.236 | 0.215 |          |       |  | <i>RASD2</i>     | 5'UTR   |
| cg26581504 | 11 | 112,046,963 | 3.26E-18 | 0.236 | 0.216 |          |       |  | <i>BCO2</i>      | TSS200  |
| cg01793445 | 1  | 167,632,415 | 1.66E-08 | 0.236 | 0.252 |          |       |  | <i>RCSD1</i>     | Body    |
| cg02511456 | 7  | 156,801,419 | 0.000786 | 0.236 | 0.231 |          |       |  | <i>MNX1</i>      | Body    |
| cg09832245 | 16 | 85,494,611  | 3.68E-11 | 0.236 | 0.228 |          |       |  |                  |         |
| cg17173369 | 6  | 169,224,099 | 1.24E-08 | 0.236 | 0.219 |          |       |  |                  |         |
| cg03489023 | 2  | 19,557,201  | 9.94E-06 | 0.236 | 0.244 |          |       |  | <i>OSR1</i>      | 5'UTR   |
| cg07786995 | 1  | 162,114,714 | 4.95E-06 | 0.236 | 0.223 |          |       |  | <i>NOS1AP</i>    | Body    |
| cg09515953 | 19 | 38,747,355  | 0.002859 | 0.236 | 0.303 |          |       |  | <i>PPP1R14A</i>  | TSS200  |
| cg02101486 | 7  | 96,652,245  | 0.004322 | 0.236 | 0.248 | 1.97E-14 | 0.230 |  | <i>DLX5</i>      | Body    |
| cg13575011 | 19 | 16,022,472  | 9.89E-05 | 0.236 | 0.233 |          |       |  |                  |         |
| cg14317414 | 9  | 109,991,376 | 8.45E-08 | 0.236 | 0.238 |          |       |  |                  |         |
| cg01857019 | 15 | 57,210,107  | 0.001386 | 0.236 | 0.206 |          |       |  | <i>LOC145783</i> | Body    |
| cg11854183 | 19 | 38,741,928  | 0.00012  | 0.236 | 0.218 |          |       |  | <i>PPP1R14A</i>  | 3'UTR   |
| cg05144259 | 7  | 157,808,584 | 1.41E-13 | 0.236 | 0.256 |          |       |  | <i>PTPRN2</i>    | Body    |

|            |    |             |          |       |       |          |       |  |                  |         |
|------------|----|-------------|----------|-------|-------|----------|-------|--|------------------|---------|
| cg13638427 | 6  | 29,617,320  | 0.002456 | 0.236 | 0.147 |          |       |  |                  |         |
| cg20099830 | 12 | 114,842,031 | 0.005282 | 0.236 | 0.260 |          |       |  | <i>TBX5</i>      | 5'UTR   |
| cg20917077 | 7  | 129,996,313 | 2.73E-12 | 0.236 | 0.207 |          |       |  | <i>CPA5</i>      | Body    |
| cg16655084 | 1  | 184,005,896 | 0.011405 | 0.236 | 0.168 |          |       |  | <i>GLT25D2</i>   | Body    |
| cg13278353 | 2  | 208,635,942 | 3.6E-10  | 0.236 | 0.226 |          |       |  |                  |         |
| cg13218688 | 18 | 72,125,544  | 2.3E-08  | 0.236 | 0.195 |          |       |  | <i>FAM69C</i>    | TSS1500 |
| cg06420480 | 17 | 78,923,244  | 1.03E-20 | 0.236 | 0.239 |          |       |  | <i>RPTOR</i>     | Body    |
| cg08555653 | 3  | 138,659,021 | 0.000175 | 0.236 | 0.239 |          |       |  |                  |         |
| cg02773945 | 1  | 200,011,858 | 0.019246 | 0.236 | 0.261 |          |       |  | <i>NR5A2</i>     | Body    |
| cg13502125 | 1  | 147,826,191 | 3.29E-09 | 0.236 | 0.244 |          |       |  |                  |         |
| cg15794778 | Y  | 21,665,021  | 0.014256 | 0.236 | 0.192 |          |       |  | <i>BCORL2</i>    | Body    |
| cg24056567 | 8  | 18,871,909  | 0.007174 | 0.236 | 0.127 | 8.24E-14 | 0.158 |  | <i>PSD3</i>      | TSS1500 |
| cg04555312 | 12 | 54,389,114  | 0.006922 | 0.236 | 0.205 |          |       |  |                  |         |
| cg06324373 | 10 | 99,734,805  | 0.000597 | 0.236 | 0.257 |          |       |  | <i>CRTAC1</i>    | Body    |
| cg08119655 | 11 | 7,595,925   | 1.92E-10 | 0.236 | 0.231 |          |       |  | <i>PPFIBP2</i>   | Body    |
| cg16519842 | 1  | 149,399,911 | 7.4E-09  | 0.236 | 0.180 |          |       |  | <i>HIST2H2BF</i> | TSS1500 |
| cg07212778 | 2  | 119,916,510 | 0.00294  | 0.236 | 0.220 |          |       |  | <i>C1QL2</i>     | TSS200  |
| cg02235562 | 13 | 36,729,137  | 0.000835 | 0.236 | 0.189 |          |       |  |                  |         |
| cg04277821 | 6  | 150,572,395 | 6.23E-09 | 0.236 | 0.185 |          |       |  |                  |         |
| cg14344989 | 9  | 137,329,237 | 6.88E-13 | 0.236 | 0.238 |          |       |  | <i>RXRA</i>      | 3'UTR   |
| cg18376817 | 15 | 64,438,372  | 1.06E-26 | 0.236 | 0.227 |          |       |  |                  |         |
| cg13943560 | X  | 40,004,481  | 4.56E-06 | 0.236 | 0.159 |          |       |  | <i>BCOR</i>      | 5'UTR   |
| cg09000800 | 17 | 4,545,081   | 0.020553 | 0.236 | 0.367 |          |       |  | <i>ALOX15</i>    | TSS200  |
| cg26754262 | 8  | 75,617,860  | 3.33E-13 | 0.236 | 0.254 |          |       |  | <i>MIR2052</i>   | TSS200  |
| cg02694884 | 8  | 99,411,691  | 1.86E-24 | 0.236 | 0.240 |          |       |  |                  |         |
| cg16924045 | 2  | 191,343,262 | 0.000124 | 0.236 | 0.210 |          |       |  | <i>MFSD6</i>     | Body    |
| cg24460369 | 12 | 109,549,041 | 2.46E-07 | 0.236 | 0.175 |          |       |  |                  |         |
| cg26376168 | 6  | 30,712,439  | 0.006957 | 0.236 | 0.207 |          |       |  | <i>IER3</i>      | TSS200  |
| cg19592637 | 20 | 25,063,052  | 1.09E-08 | 0.236 | 0.211 |          |       |  | <i>VSX1</i>      | TSS1500 |
| cg21553980 | 17 | 109,444     | 1.27E-09 | 0.236 | 0.212 |          |       |  | <i>RPH3AL</i>    | Body    |
| cg27333706 | 1  | 209,602,002 | 6.55E-05 | 0.236 | 0.135 |          |       |  | <i>LOC642587</i> | TSS200  |
| cg09664054 | 1  | 42,179,097  | 1.38E-22 | 0.236 | 0.236 |          |       |  | <i>HIVEP3</i>    | 5'UTR   |
| cg19556613 | 5  | 116,280,275 | 1.41E-11 | 0.236 | 0.232 |          |       |  |                  |         |
| cg24674635 | 20 | 6,750,696   | 0.007389 | 0.236 | 0.277 |          |       |  | <i>BMP2</i>      | 5'UTR   |

|            |    |             |          |       |       |          |       |  |                 |         |
|------------|----|-------------|----------|-------|-------|----------|-------|--|-----------------|---------|
| cg15423872 | 8  | 58,906,736  | 0.028045 | 0.236 | 0.133 |          |       |  | <i>FAM110B</i>  | TSS1500 |
| cg16214653 | 15 | 100,048,500 | 5.98E-05 | 0.236 | 0.205 |          |       |  |                 |         |
| cg19250989 | 1  | 147,752,892 | 5.64E-05 | 0.236 | 0.252 |          |       |  |                 |         |
| cg01494399 | 16 | 81,709,890  | 8.1E-11  | 0.236 | 0.247 |          |       |  | <i>CMIP</i>     | Body    |
| cg05730368 | 6  | 42,146,052  | 7.28E-10 | 0.236 | 0.217 |          |       |  | <i>GUCA1A</i>   | Body    |
| cg07502417 | 1  | 230,849,801 | 0.00048  | 0.236 | 0.245 |          |       |  | <i>AGT</i>      | 5'UTR   |
| cg14457691 | X  | 100,740,937 | 0.000653 | 0.236 | 0.171 | 2.06E-17 | 0.184 |  | <i>ARMCX4</i>   | Body    |
| cg04447362 | 2  | 237,654,635 | 5.77E-08 | 0.236 | 0.193 |          |       |  |                 |         |
| cg05551825 | 7  | 5,735,129   | 8.17E-06 | 0.236 | 0.216 |          |       |  | <i>RNF216</i>   | Body    |
| cg13303069 | 2  | 85,361,842  | 0.000745 | 0.236 | 0.280 |          |       |  | <i>TCF7L1</i>   | Body    |
| cg11676353 | 1  | 39,548,001  | 6.76E-12 | 0.236 | 0.248 |          |       |  | <i>MACF1</i>    | 5'UTR   |
| cg03423916 | 1  | 153,670,787 | 8.92E-05 | 0.236 | 0.233 |          |       |  |                 |         |
| cg17585615 | 21 | 46,128,908  | 0.019559 | 0.236 | 0.258 |          |       |  | <i>C21orf29</i> | Body    |
| cg02222324 | 2  | 10,231,621  | 0.002417 | 0.236 | 0.227 |          |       |  |                 |         |
| cg13290371 | 7  | 5,518,071   | 3.6E-11  | 0.236 | 0.224 |          |       |  | <i>FBXL18</i>   | 3'UTR   |
| cg23986620 | 2  | 177,012,706 | 7.96E-09 | 0.236 | 0.214 |          |       |  |                 |         |
| cg10189261 | 14 | 101,176,105 | 0.001863 | 0.236 | 0.205 |          |       |  |                 |         |
| cg25529875 | 6  | 13,413,705  | 1.26E-16 | 0.236 | 0.242 |          |       |  | <i>GFOD1</i>    | Body    |
| cg04510874 | 15 | 91,427,884  | 0.005671 | 0.236 | 0.164 |          |       |  | <i>FES</i>      | 5'UTR   |
| cg09493406 | 7  | 91,765,513  | 1.38E-18 | 0.236 | 0.199 |          |       |  | <i>CYP51A1</i>  | TSS1500 |
| cg10572355 | 1  | 119,549,145 | 0.007266 | 0.236 | 0.217 |          |       |  |                 |         |
| cg11642106 | 3  | 27,772,805  | 0.000641 | 0.236 | 0.255 |          |       |  |                 |         |
| cg14582917 | 9  | 132,262,821 | 9.06E-18 | 0.236 | 0.247 |          |       |  |                 |         |
| cg25625968 | 5  | 38,464,319  | 1.13E-07 | 0.236 | 0.256 |          |       |  | <i>EGFLAM</i>   | 3'UTR   |
| cg13274938 | 17 | 38,493,822  | 3.45E-17 | 0.236 | 0.229 |          |       |  | <i>RARA</i>     | Body    |
| cg27385193 | 7  | 21,208,954  | 1.26E-07 | 0.236 | 0.213 |          |       |  |                 |         |
| cg14410476 | 2  | 95,693,023  | 0.003622 | 0.236 | 0.247 |          |       |  | <i>MAL</i>      | Body    |
| cg23227259 | 2  | 132,152,543 | 0.00027  | 0.236 | 0.261 |          |       |  |                 |         |
| cg01336781 | 8  | 23,563,182  | 0.001064 | 0.236 | 0.189 |          |       |  | <i>NKX2-6</i>   | Body    |
| cg01402631 | 5  | 136,359,400 | 7.03E-10 | 0.236 | 0.208 |          |       |  | <i>SPOCK1</i>   | Body    |
| cg05121006 | 4  | 85,402,397  | 0.006879 | 0.236 | 0.237 |          |       |  |                 |         |
| cg21540621 | 11 | 115,531,033 | 1.01E-06 | 0.236 | 0.200 |          |       |  |                 |         |
| cg01697487 | 17 | 48,588,559  | 7.55E-06 | 0.236 | 0.241 |          |       |  | <i>MYCBPAP</i>  | Body    |
| cg12619509 | 16 | 2,286,601   | 0.003891 | 0.236 | 0.129 | 9.86E-11 | 0.134 |  | <i>DNASE1L2</i> | 5'UTR   |

|            |    |             |          |       |       |          |       |     |                  |         |
|------------|----|-------------|----------|-------|-------|----------|-------|-----|------------------|---------|
| cg06872822 | 5  | 6,582,121   | 6.17E-15 | 0.236 | 0.249 |          |       |     | <i>LOC255167</i> | TSS1500 |
| cg03130910 | 1  | 234,908,226 | 0.029539 | 0.236 | 0.149 |          |       |     |                  |         |
| cg20599967 | 2  | 119,592,754 | 0.001339 | 0.236 | 0.204 |          |       |     |                  |         |
| cg22010052 | 5  | 115,298,704 | 1.4E-06  | 0.236 | 0.229 |          |       |     | <i>LVRN</i>      | 1stExon |
| cg26031954 | 1  | 2,139,327   | 1.09E-12 | 0.236 | 0.230 |          |       |     | <i>C1orf86</i>   | TSS200  |
| cg06083669 | 20 | 3,189,437   | 0.003041 | 0.236 | 0.221 |          |       |     | <i>ITPA</i>      | TSS1500 |
| cg08639389 | 4  | 26,995,889  | 1.2E-16  | 0.236 | 0.234 |          |       |     | <i>STIM2</i>     | Body    |
| cg20264966 | 10 | 68,688,049  | 0.000538 | 0.236 | 0.223 |          |       |     | <i>CTNNA3</i>    | Body    |
| cg09430647 | 10 | 106,247,914 | 0.012298 | 0.236 | 0.192 |          |       |     |                  |         |
| cg03131724 | 11 | 58,731,433  | 0.00014  | 0.236 | 0.201 |          |       |     |                  |         |
| cg26259363 | 2  | 220,282,281 | 5.22E-09 | 0.236 | 0.252 | 4.71E-26 | 0.260 |     | <i>DES</i>       | TSS1500 |
| cg13720639 | 14 | 72,061,746  | 3.43E-08 | 0.235 | 0.220 |          |       | Yes | <i>SIPA1L1</i>   | Body    |
| cg23012600 | 1  | 244,088,110 | 1.02E-12 | 0.235 | 0.218 |          |       |     |                  |         |
| cg25508679 | 6  | 28,956,403  | 3.86E-06 | 0.235 | 0.232 |          |       |     |                  |         |
| cg14916924 | 9  | 129,433,969 | 6.95E-10 | 0.235 | 0.231 |          |       |     | <i>LMX1B</i>     | Body    |
| cg00040837 | 1  | 236,081,097 | 5.68E-05 | 0.235 | 0.224 |          |       | Yes |                  |         |
| cg03605610 | 6  | 41,394,765  | 4.24E-17 | 0.235 | 0.220 |          |       |     |                  |         |
| cg09943716 | 20 | 55,202,236  | 3.99E-05 | 0.235 | 0.236 |          |       |     |                  |         |
| cg27002699 | 19 | 11,689,538  | 0.000184 | 0.235 | 0.235 |          |       |     | <i>ACP5</i>      | TSS1500 |
| cg01776188 | 5  | 172,664,082 | 0.00015  | 0.235 | 0.216 |          |       |     |                  |         |
| cg14213692 | 4  | 6,732,388   | 1.43E-06 | 0.235 | 0.251 |          |       |     |                  |         |
| cg17864046 | 6  | 166,422,341 | 0.002323 | 0.235 | 0.198 |          |       |     |                  |         |
| cg20292636 | 1  | 204,328,377 | 9.9E-18  | 0.235 | 0.237 |          |       |     | <i>PLEKHA6</i>   | 5'UTR   |
| cg26310273 | 3  | 55,377,420  | 5.9E-15  | 0.235 | 0.220 |          |       |     |                  |         |
| cg04221521 | 5  | 72,597,715  | 0.000139 | 0.235 | 0.174 |          |       |     |                  |         |
| cg04659582 | 2  | 231,276,073 | 1.1E-05  | 0.235 | 0.180 |          |       |     |                  |         |
| cg12018969 | 2  | 43,350,413  | 2.32E-14 | 0.235 | 0.234 |          |       | Yes |                  |         |
| cg20822858 | 6  | 134,499,519 | 0.006599 | 0.235 | 0.273 |          |       |     | <i>SGK1</i>      | Body    |
| cg09940032 | 8  | 142,215,736 | 0.047377 | 0.235 | 0.173 |          |       |     |                  |         |
| cg23207990 | 4  | 154,710,535 | 0.00328  | 0.235 | 0.298 |          |       |     | <i>SFRP2</i>     | TSS1500 |
| cg18297437 | 3  | 147,131,332 | 4.12E-07 | 0.235 | 0.260 |          |       |     | <i>ZIC1</i>      | Body    |
| cg03085785 | 7  | 27,247,651  | 4.69E-05 | 0.235 | 0.235 |          |       |     |                  |         |
| cg26397549 | 14 | 37,116,121  | 3.8E-05  | 0.235 | 0.227 |          |       |     |                  |         |
| cg03692563 | 11 | 31,846,414  | 0.000838 | 0.235 | 0.264 |          |       |     |                  |         |

|            |    |             |          |       |       |          |       |  |          |         |
|------------|----|-------------|----------|-------|-------|----------|-------|--|----------|---------|
| cg16365064 | 5  | 172,984,486 | 4.4E-14  | 0.235 | 0.213 |          |       |  |          |         |
| cg27204671 | 17 | 46,831,623  | 5.59E-06 | 0.235 | 0.222 |          |       |  |          |         |
| cg17759535 | 1  | 200,010,137 | 0.007495 | 0.235 | 0.293 |          |       |  | NR5A2    | Body    |
| cg02027878 | 7  | 150,711,138 | 2.32E-06 | 0.235 | 0.211 |          |       |  | ATG9B    | 3'UTR   |
| cg09229918 | 16 | 2,041,916   | 4.31E-05 | 0.235 | 0.206 |          |       |  | SYNGR3   | Body    |
| cg09267056 | 1  | 90,410,109  | 2.88E-10 | 0.235 | 0.214 |          |       |  |          |         |
| cg22624907 | 1  | 80,447,732  | 0.014559 | 0.235 | 0.135 |          |       |  |          |         |
| cg04224064 | 14 | 36,992,233  | 1.97E-05 | 0.235 | 0.257 |          |       |  |          |         |
| cg08884974 | 15 | 31,505,024  | 0.017754 | 0.235 | 0.127 |          |       |  |          |         |
| cg09550083 | 2  | 66,672,337  | 2.11E-06 | 0.235 | 0.244 |          |       |  | MEIS1    | Body    |
| cg12235877 | 12 | 323,392     | 0.012964 | 0.235 | 0.307 |          |       |  | SLC6A12  | TSS1500 |
| cg15087907 | 10 | 3,169,259   | 0.033098 | 0.235 | 0.077 |          |       |  | PFKP     | Body    |
| cg04864807 | 2  | 121,412,139 | 1.25E-09 | 0.235 | 0.231 |          |       |  |          |         |
| cg09018299 | 16 | 24,748,339  | 2.25E-08 | 0.235 | 0.248 |          |       |  | TNRC6A   | Body    |
| cg10184983 | 17 | 36,734,911  | 1.49E-05 | 0.235 | 0.224 |          |       |  | SRCIN1   | Body    |
| cg06393679 | 7  | 7,140,086   | 1.48E-07 | 0.235 | 0.203 |          |       |  |          |         |
| cg09178385 | 1  | 35,246,759  | 4.01E-08 | 0.235 | 0.186 |          |       |  | GJB3     | TSS200  |
| cg14015656 | 9  | 100,070,142 | 0.006879 | 0.235 | 0.169 |          |       |  | KIAA1529 | Body    |
| cg17654970 | 2  | 163,027,484 | 0.000252 | 0.235 | 0.179 |          |       |  | FAP      | 3'UTR   |
| cg00743094 | 13 | 100,547,968 | 0.000412 | 0.235 | 0.210 |          |       |  | CLYBL    | 3'UTR   |
| cg09571713 | 4  | 168,154,775 | 0.004906 | 0.235 | 0.280 |          |       |  | SPOCK3   | Body    |
| cg01777643 | 1  | 224,805,287 | 0.01186  | 0.235 | 0.201 |          |       |  | CNIH3    | Body    |
| cg22798214 | 1  | 212,692,190 | 4.42E-07 | 0.235 | 0.213 |          |       |  |          |         |
| cg24530432 | 4  | 174,428,060 | 0.008785 | 0.235 | 0.238 |          |       |  |          |         |
| cg03475190 | 7  | 30,919,932  | 1.55E-08 | 0.235 | 0.201 |          |       |  | FAM188B  | Body    |
| cg20643029 | 21 | 37,915,044  | 5.48E-08 | 0.235 | 0.215 |          |       |  | CLDN14   | TSS200  |
| cg25320780 | 1  | 110,933,345 | 4.94E-08 | 0.235 | 0.223 |          |       |  | SLC16A4  | 5'UTR   |
| cg27662789 | 12 | 43,666,281  | 2.55E-12 | 0.235 | 0.199 |          |       |  |          |         |
| cg03350138 | 6  | 28,446,794  | 0.000166 | 0.235 | 0.202 |          |       |  |          |         |
| cg25600766 | 12 | 22,486,484  | 0.000134 | 0.235 | 0.202 |          |       |  | ST8SIA1  | Body    |
| cg26382697 | 11 | 2,406,712   | 3.36E-17 | 0.235 | 0.212 |          |       |  | CD81     | Body    |
| cg24985060 | 15 | 25,920,220  | 4.09E-06 | 0.235 | 0.199 |          |       |  |          |         |
| cg01254505 | 19 | 17,516,470  | 1.21E-06 | 0.235 | 0.201 | 3.37E-14 | 0.127 |  | BST2     | TSS200  |
| cg01478234 | 12 | 107,975,299 | 3.35E-13 | 0.235 | 0.216 |          |       |  | BTBD11   | Body    |

|            |    |             |          |       |       |          |       |  |                |         |
|------------|----|-------------|----------|-------|-------|----------|-------|--|----------------|---------|
| cg06133205 | 13 | 50,701,960  | 5.09E-05 | 0.235 | 0.241 |          |       |  |                |         |
| cg18698884 | 11 | 16,632,724  | 0.004058 | 0.235 | 0.195 |          |       |  |                |         |
| cg09912079 | 4  | 3,409,828   | 1.17E-11 | 0.235 | 0.209 |          |       |  | <i>RGS12</i>   | Body    |
| cg16231241 | 6  | 33,215,838  | 0.000725 | 0.235 | 0.243 |          |       |  |                |         |
| cg16563171 | 2  | 223,156,106 | 0.001884 | 0.235 | 0.202 |          |       |  | <i>PAX3</i>    | Body    |
| cg26626663 | 8  | 121,137,879 | 0.004191 | 0.235 | 0.291 |          |       |  | <i>COL14A1</i> | 5'UTR   |
| cg27577554 | 17 | 30,412,142  | 1.09E-06 | 0.235 | 0.211 |          |       |  |                |         |
| cg01347682 | 4  | 140,656,794 | 9.13E-05 | 0.235 | 0.209 |          |       |  | <i>MAML3</i>   | Body    |
| cg14098223 | 1  | 2,262,333   | 3.37E-06 | 0.235 | 0.247 |          |       |  | <i>MORN1</i>   | Body    |
| cg25701646 | 3  | 57,969,522  | 7.44E-06 | 0.235 | 0.217 |          |       |  |                |         |
| cg00525383 | X  | 136,647,793 | 0.000145 | 0.235 | 0.273 |          |       |  | <i>ZIC3</i>    | TSS1500 |
| cg05239310 | 14 | 95,651,984  | 2.29E-07 | 0.235 | 0.224 |          |       |  | <i>CLMN</i>    | 3'UTR   |
| cg09507761 | 5  | 96,152,293  | 1.4E-05  | 0.235 | 0.222 |          |       |  |                |         |
| cg01202519 | 11 | 85,645,743  | 9.22E-16 | 0.235 | 0.248 |          |       |  |                |         |
| cg18836366 | 13 | 24,007,560  | 0.006138 | 0.235 | 0.140 |          |       |  | <i>SACS</i>    | 5'UTR   |
| cg03547017 | 17 | 37,031,281  | 2.72E-09 | 0.235 | 0.226 |          |       |  | <i>LASP1</i>   | Body    |
| cg23452752 | 2  | 10,572,946  | 0.000556 | 0.235 | 0.170 |          |       |  |                |         |
| cg26506007 | 17 | 41,939,449  | 8.17E-13 | 0.235 | 0.249 |          |       |  | <i>CD300LG</i> | 3'UTR   |
| cg03731473 | 2  | 130,901,674 | 6.22E-07 | 0.235 | 0.206 |          |       |  | <i>CCDC74B</i> | Body    |
| cg08545287 | 16 | 6,069,047   | 0.031054 | 0.235 | 0.234 |          |       |  | <i>A2BP1</i>   | TSS200  |
| cg16565394 | 6  | 100,896,674 | 0.001159 | 0.235 | 0.268 |          |       |  | <i>SIM1</i>    | Body    |
| cg05477457 | 4  | 169,799,308 | 0.002809 | 0.235 | 0.134 |          |       |  | <i>PALLD</i>   | Body    |
| cg20823772 | 8  | 99,962,013  | 1.42E-07 | 0.235 | 0.236 |          |       |  | <i>OSR2</i>    | Body    |
| cg03020951 | 6  | 34,203,887  | 1.48E-05 | 0.235 | 0.225 | 3.89E-16 | 0.191 |  | <i>HMGA1</i>   | TSS1500 |
| cg16079347 | 9  | 100,265,181 | 2.44E-08 | 0.235 | 0.198 |          |       |  | <i>TMOD1</i>   | 5'UTR   |
| cg01341487 | 22 | 43,505,954  | 7.67E-10 | 0.235 | 0.176 |          |       |  | <i>BIK</i>     | TSS1500 |
| cg04441405 | 5  | 1,877,309   | 6.78E-07 | 0.235 | 0.212 |          |       |  |                |         |
| cg08461451 | 19 | 2,295,092   | 2.21E-11 | 0.235 | 0.210 |          |       |  | <i>LINGO3</i>  | 5'UTR   |
| cg07696842 | 12 | 105,089,508 | 0.001044 | 0.235 | 0.179 |          |       |  | <i>CHST11</i>  | Body    |
| cg08566449 | 6  | 31,631,706  | 9.57E-08 | 0.235 | 0.246 |          |       |  | <i>BAT4</i>    | Body    |
| cg14221171 | 7  | 97,361,759  | 0.000272 | 0.235 | 0.247 | 1.03E-18 | 0.168 |  | <i>TAC1</i>    | 5'UTR   |
| cg06267617 | 1  | 172,291,727 | 5.42E-14 | 0.235 | 0.225 |          |       |  | <i>DNM3</i>    | Body    |
| cg15530351 | 8  | 6,407,676   | 7.16E-06 | 0.235 | 0.210 |          |       |  | <i>ANGPT2</i>  | Body    |
| cg03339609 | 19 | 34,662,636  | 1.9E-05  | 0.235 | 0.239 |          |       |  | <i>LSM14A</i>  | TSS1500 |

|            |    |             |          |       |       |  |  |  |                 |         |
|------------|----|-------------|----------|-------|-------|--|--|--|-----------------|---------|
| cg09100271 | 8  | 48,675,911  | 1.3E-05  | 0.235 | 0.171 |  |  |  |                 |         |
| cg18892169 | 1  | 150,737,762 | 0.000715 | 0.235 | 0.194 |  |  |  | <i>CTSS</i>     | 5'UTR   |
| cg24805875 | 6  | 117,086,941 | 0.017595 | 0.235 | 0.198 |  |  |  | <i>FAM162B</i>  | TSS200  |
| cg04110105 | 3  | 46,395,356  | 0.001599 | 0.235 | 0.225 |  |  |  | <i>CCR2</i>     | 5'UTR   |
| cg25819602 | 7  | 96,627,634  | 0.036524 | 0.235 | 0.310 |  |  |  | <i>DLX6AS</i>   | Body    |
| cg04971534 | 17 | 27,333,432  | 0.005228 | 0.235 | 0.239 |  |  |  | <i>SEZ6</i>     | TSS1500 |
| cg06126593 | 16 | 20,910,405  | 0.000262 | 0.235 | 0.249 |  |  |  | <i>LYRM1</i>    | TSS1500 |
| cg12172441 | 6  | 28,176,163  | 0.003374 | 0.235 | 0.284 |  |  |  |                 |         |
| cg26530713 | 1  | 153,928,406 | 3.35E-31 | 0.235 | 0.221 |  |  |  | <i>CRTC2</i>    | Body    |
| cg11390690 | 10 | 86,120,572  | 7.7E-08  | 0.235 | 0.244 |  |  |  | <i>FAM190B</i>  | 5'UTR   |
| cg12338137 | 2  | 218,701,429 | 2.63E-08 | 0.235 | 0.221 |  |  |  | <i>TNS1</i>     | Body    |
| cg13677415 | 17 | 35,291,900  | 0.000443 | 0.235 | 0.235 |  |  |  |                 |         |
| cg17882660 | 13 | 100,637,258 | 0.000422 | 0.235 | 0.212 |  |  |  | <i>ZIC2</i>     | Body    |
| cg10129665 | 12 | 54,133,618  | 0.003839 | 0.235 | 0.170 |  |  |  |                 |         |
| cg14037769 | 1  | 9,895,799   | 3.43E-12 | 0.235 | 0.220 |  |  |  |                 |         |
| cg21049587 | X  | 46,938,148  | 6.91E-08 | 0.235 | 0.246 |  |  |  | <i>RGN</i>      | 5'UTR   |
| cg26365545 | 5  | 76,932,016  | 0.006989 | 0.235 | 0.270 |  |  |  | <i>OTP</i>      | Body    |
| cg23244289 | 5  | 79,331,135  | 0.035889 | 0.235 | 0.138 |  |  |  | <i>THBS4</i>    | 5'UTR   |
| cg20492922 | 1  | 39,194,066  | 0.008246 | 0.235 | 0.140 |  |  |  |                 |         |
| cg07919145 | 22 | 39,780,408  | 1.3E-11  | 0.235 | 0.229 |  |  |  | <i>SYNGR1</i>   | 3'UTR   |
| cg13023646 | 4  | 165,898,835 | 2.12E-07 | 0.235 | 0.219 |  |  |  | <i>TRIM61</i>   | TSS200  |
| cg15312264 | 14 | 55,907,299  | 0.000105 | 0.235 | 0.218 |  |  |  | <i>TBPL2</i>    | TSS200  |
| cg23262274 | 1  | 38,412,519  | 3.9E-06  | 0.235 | 0.217 |  |  |  | <i>INPP5B</i>   | 5'UTR   |
| cg04496791 | 6  | 41,395,094  | 0.004735 | 0.235 | 0.158 |  |  |  |                 |         |
| cg01490094 | 8  | 72,917,363  | 0.019489 | 0.235 | 0.298 |  |  |  |                 |         |
| cg11072113 | 11 | 61,063,124  | 2.02E-19 | 0.235 | 0.212 |  |  |  | <i>VWCE</i>     | TSS1500 |
| cg14260530 | 9  | 117,157,871 | 1.65E-22 | 0.235 | 0.206 |  |  |  | <i>AKNA</i>     | TSS1500 |
| cg16546861 | X  | 49,022,452  | 1.35E-07 | 0.235 | 0.174 |  |  |  | <i>MAGIX</i>    | Body    |
| cg24771804 | 18 | 55,107,755  | 0.002348 | 0.235 | 0.302 |  |  |  | <i>ONECUT2</i>  | Body    |
| cg16592832 | 22 | 24,891,141  | 0.034196 | 0.235 | 0.266 |  |  |  | <i>C22orf45</i> | TSS1500 |
| cg27342837 | 2  | 188,419,568 | 0.00924  | 0.235 | 0.215 |  |  |  | <i>TFPI</i>     | TSS1500 |
| cg00169725 | 5  | 176,543,901 | 0.041208 | 0.235 | 0.224 |  |  |  |                 |         |
| cg17924476 | 5  | 323,794     | 2.86E-09 | 0.235 | 0.246 |  |  |  | <i>AHRR</i>     | Body    |
| cg22578843 | 13 | 28,495,598  | 0.017599 | 0.235 | 0.208 |  |  |  | <i>PDX1</i>     | Body    |

|            |    |             |          |       |       |          |       |  |                     |         |
|------------|----|-------------|----------|-------|-------|----------|-------|--|---------------------|---------|
| cg04339553 | 15 | 37,307,513  | 0.010655 | 0.235 | 0.240 |          |       |  | <i>MEIS2</i>        | Body    |
| cg09477232 | 7  | 106,061,801 | 1.6E-06  | 0.235 | 0.230 |          |       |  |                     |         |
| cg01363324 | 9  | 124,979,353 | 3.16E-11 | 0.235 | 0.223 |          |       |  | <i>LHX6</i>         | Body    |
| cg23047271 | 3  | 64,210,991  | 0.000332 | 0.235 | 0.197 | 1.01E-07 | 0.102 |  | <i>PRICKLE2</i>     | 1stExon |
| cg07492518 | 20 | 443,641     | 0.001463 | 0.235 | 0.291 |          |       |  | <i>TBC1D20</i>      | TSS1500 |
| cg15053022 | 19 | 36,048,484  | 2.65E-06 | 0.235 | 0.223 |          |       |  | <i>ATP4A</i>        | Body    |
| cg03821689 | 11 | 117,748,187 | 5.26E-05 | 0.235 | 0.195 |          |       |  | <i>FXVD6</i>        | TSS1500 |
| cg20026939 | 18 | 44,788,898  | 0.005684 | 0.235 | 0.213 |          |       |  |                     |         |
| cg01779383 | 10 | 94,180,753  | 7.99E-06 | 0.235 | 0.202 |          |       |  |                     |         |
| cg03763874 | 19 | 933,707     | 6.37E-12 | 0.235 | 0.242 |          |       |  | <i>ARID3A</i>       | Body    |
| cg05469885 | 3  | 124,103,652 | 4.05E-08 | 0.235 | 0.208 |          |       |  | <i>KALRN</i>        | Body    |
| cg24479524 | 1  | 20,512,796  | 3.58E-05 | 0.235 | 0.220 |          |       |  | <i>UBXN10</i>       | 5'UTR   |
| cg16966962 | 1  | 201,915,989 | 0.013282 | 0.235 | 0.086 |          |       |  | <i>LMOD1</i>        | TSS1500 |
| cg10749912 | 10 | 99,531,934  | 0.029712 | 0.235 | 0.194 |          |       |  | <i>SFRP5</i>        | TSS200  |
| cg11071207 | 1  | 110,611,218 | 0.000321 | 0.235 | 0.242 |          |       |  | <i>ALX3</i>         | Body    |
| cg11635839 | 11 | 129,243,456 | 0.001087 | 0.235 | 0.292 |          |       |  |                     |         |
| cg24936799 | 10 | 99,798,395  | 5.36E-05 | 0.235 | 0.244 |          |       |  |                     |         |
| cg00901493 | 17 | 7,197,375   | 0.000179 | 0.235 | 0.172 | 8.77E-18 | 0.174 |  | <i>YBX2</i>         | Body    |
| cg04352288 | 16 | 87,958,407  | 0.001109 | 0.235 | 0.133 |          |       |  | <i>CA5A</i>         | Body    |
| cg05979400 | 2  | 27,295,591  | 5.45E-11 | 0.235 | 0.228 |          |       |  | <i>LOC100128731</i> | TSS1500 |
| cg27209729 | 11 | 64,428,925  | 5.81E-09 | 0.235 | 0.239 |          |       |  | <i>NRXN2</i>        | Body    |
| cg14031365 | 7  | 20,816,695  | 5.96E-06 | 0.235 | 0.194 |          |       |  |                     |         |
| cg17374433 | 10 | 119,876,327 | 0.014436 | 0.235 | 0.189 |          |       |  | <i>CASC2</i>        | Body    |
| cg00318947 | 7  | 27,154,914  | 2.3E-10  | 0.235 | 0.227 |          |       |  | <i>HOXA3</i>        | 5'UTR   |
| cg24262325 | 21 | 43,305,576  | 1.08E-10 | 0.235 | 0.180 |          |       |  | <i>C2CD2</i>        | 3'UTR   |
| cg03270710 | 2  | 74,729,592  | 0.000398 | 0.235 | 0.248 |          |       |  | <i>LBX2</i>         | Body    |
| cg05265484 | 17 | 52,977,445  | 0.000436 | 0.235 | 0.201 |          |       |  | <i>TOM1L1</i>       | TSS1500 |
| cg06470626 | 16 | 22,364,961  | 8.88E-06 | 0.235 | 0.232 |          |       |  | <i>CDR2</i>         | Body    |
| cg07021052 | 2  | 20,871,279  | 0.000304 | 0.235 | 0.271 |          |       |  |                     |         |
| cg23881926 | 8  | 59,058,656  | 1.57E-06 | 0.235 | 0.223 |          |       |  | <i>FAM110B</i>      | 5'UTR   |
| cg07312701 | 13 | 46,189,883  | 0.022181 | 0.235 | 0.282 |          |       |  | <i>FAM194B</i>      | TSS200  |
| cg12150784 | 11 | 119,613,308 | 0.000513 | 0.235 | 0.217 |          |       |  |                     |         |
| cg05576245 | 7  | 138,719,784 | 2.69E-16 | 0.235 | 0.230 |          |       |  | <i>ZC3HAV1L</i>     | Body    |
| cg13877315 | 9  | 140,172,089 | 4.56E-06 | 0.235 | 0.233 |          |       |  | <i>C9orf167</i>     | TSS200  |



|            |    |             |          |       |       |          |       |  |                |         |
|------------|----|-------------|----------|-------|-------|----------|-------|--|----------------|---------|
| cg15632862 | 1  | 38,471,572  | 0.000992 | 0.235 | 0.153 |          |       |  | <i>FHL3</i>    | TSS1500 |
| cg19803952 | 20 | 44,036,136  | 1.91E-12 | 0.235 | 0.218 |          |       |  | <i>DBNDD2</i>  | 5'UTR   |
| cg20820622 | 15 | 70,354,647  | 1.39E-17 | 0.235 | 0.239 |          |       |  | <i>TLE3</i>    | Body    |
| cg13918433 | 7  | 115,779,350 | 8.01E-15 | 0.235 | 0.235 |          |       |  |                |         |
| cg17714010 | 17 | 78,968,450  | 7.51E-10 | 0.235 | 0.235 |          |       |  | <i>CHMP6</i>   | Body    |
| cg17868936 | 1  | 76,053,565  | 0.004194 | 0.235 | 0.232 |          |       |  | <i>SLC44A5</i> | 5'UTR   |
| cg07229760 | 11 | 130,596,374 | 6.67E-20 | 0.235 | 0.230 |          |       |  |                |         |
| cg14834903 | 14 | 73,712,902  | 0.000954 | 0.235 | 0.260 |          |       |  | <i>PAPLN</i>   | Body    |
| cg26061357 | 7  | 150,969,275 | 2.1E-05  | 0.235 | 0.254 |          |       |  | <i>SMARCD3</i> | Body    |
| cg04739880 | 6  | 35,017,865  | 0.00011  | 0.235 | 0.223 |          |       |  | <i>ANKS1A</i>  | Body    |
| cg12938020 | 2  | 177,027,075 | 0.005772 | 0.235 | 0.164 |          |       |  |                |         |
| cg00698916 | 6  | 13,767,628  | 1.78E-08 | 0.235 | 0.232 |          |       |  |                |         |
| cg20417500 | 5  | 73,109,241  | 8.3E-07  | 0.235 | 0.270 |          |       |  | <i>RGNEF</i>   | Body    |
| cg18233786 | 8  | 23,260,961  | 0.003161 | 0.235 | 0.183 |          |       |  | <i>LOXL2</i>   | 5'UTR   |
| cg01922437 | 12 | 67,461,690  | 5.48E-17 | 0.235 | 0.228 |          |       |  |                |         |
| cg05927714 | 17 | 36,734,660  | 1.06E-05 | 0.235 | 0.223 |          |       |  | <i>SRCIN1</i>  | Body    |
| cg21494776 | 19 | 10,397,780  | 4.29E-08 | 0.235 | 0.218 | 2.92E-13 | 0.115 |  | <i>ICAM4</i>   | 1stExon |
| cg03329019 | 1  | 221,051,117 | 4.43E-10 | 0.234 | 0.231 |          |       |  |                |         |
| cg10020892 | 1  | 147,016,901 | 5.77E-10 | 0.234 | 0.230 |          |       |  | <i>BCL9</i>    | 5'UTR   |
| cg10061736 | X  | 133,756,545 | 4.35E-07 | 0.234 | 0.221 |          |       |  | <i>PLAC1</i>   | 5'UTR   |
| cg22280258 | 17 | 4,545,157   | 0.021506 | 0.234 | 0.260 |          |       |  | <i>ALOX15</i>  | TSS200  |
| cg01816186 | 2  | 15,310,191  | 2.52E-08 | 0.234 | 0.218 |          |       |  | <i>NBAS</i>    | Body    |
| cg04243401 | 14 | 37,128,378  | 0.000177 | 0.234 | 0.238 |          |       |  | <i>PAX9</i>    | 5'UTR   |
| cg15611624 | 5  | 156,886,970 | 0.016153 | 0.234 | 0.119 |          |       |  | <i>NIPAL4</i>  | TSS200  |
| cg25065716 | 10 | 1,422,865   | 1.53E-10 | 0.234 | 0.242 |          |       |  | <i>ADARB2</i>  | Body    |
| cg02378006 | 10 | 73,026,288  | 1.23E-06 | 0.234 | 0.226 |          |       |  | <i>UNC5B</i>   | Body    |
| cg03863486 | 6  | 138,724,410 | 7.59E-08 | 0.234 | 0.226 |          |       |  | <i>HEBP2</i>   | TSS1500 |
| cg05118764 | 3  | 183,993,721 | 0.009732 | 0.234 | 0.215 |          |       |  | <i>ECE2</i>    | TSS200  |
| cg19741167 | 2  | 86,263,270  | 0.015105 | 0.234 | 0.321 |          |       |  | <i>POLR1A</i>  | Body    |
| cg04601957 | 2  | 105,467,144 | 0.000457 | 0.234 | 0.258 |          |       |  |                |         |
| cg22310648 | 3  | 58,603,027  | 0.000799 | 0.234 | 0.222 |          |       |  |                |         |
| cg23130075 | 11 | 67,418,365  | 3.14E-11 | 0.234 | 0.238 |          |       |  | <i>ACY3</i>    | TSS1500 |
| cg26564117 | 22 | 28,249,567  | 9.16E-12 | 0.234 | 0.236 |          |       |  | <i>PITPNB</i>  | 3'UTR   |
| cg01093786 | 11 | 96,047,698  | 0.00212  | 0.234 | 0.226 |          |       |  | <i>MAML2</i>   | Body    |

|            |    |             |          |       |       |          |       |  |                  |         |
|------------|----|-------------|----------|-------|-------|----------|-------|--|------------------|---------|
| cg03774463 | 7  | 96,636,616  | 7.32E-06 | 0.234 | 0.227 |          |       |  | <i>DLX6AS</i>    | Body    |
| cg04552451 | 8  | 144,852,873 | 0.000606 | 0.234 | 0.232 |          |       |  |                  |         |
| cg23250528 | 15 | 29,423,177  | 4.43E-06 | 0.234 | 0.226 |          |       |  | <i>FAM189A1</i>  | Body    |
| cg25313930 | 2  | 225,266,783 | 0.020851 | 0.234 | 0.276 |          |       |  | <i>FAM124B</i>   | TSS200  |
| cg24864511 | 1  | 6,480,516   | 0.00083  | 0.234 | 0.218 |          |       |  | <i>HES2</i>      | TSS1500 |
| cg03820828 | 2  | 219,922,362 | 1.22E-05 | 0.234 | 0.268 |          |       |  | <i>IHH</i>       | Body    |
| cg27544405 | 1  | 14,108,975  | 1.22E-09 | 0.234 | 0.211 |          |       |  | <i>PRDM2</i>     | Body    |
| cg24328539 | 15 | 45,671,016  | 0.000871 | 0.234 | 0.208 |          |       |  | <i>LOC145663</i> | Body    |
| cg01207473 | 6  | 159,359,940 | 5.41E-09 | 0.234 | 0.214 |          |       |  |                  |         |
| cg02620769 | 12 | 49,298,070  | 0.006826 | 0.234 | 0.220 | 6.66E-15 | 0.164 |  | <i>CCDC65</i>    | 1stExon |
| cg21684845 | 18 | 19,755,501  | 1.02E-22 | 0.234 | 0.209 |          |       |  | <i>GATA6</i>     | Body    |
| cg04455999 | X  | 119,444,838 | 0.036942 | 0.234 | 0.182 | 8.22E-09 | 0.126 |  | <i>FAM70A</i>    | Body    |
| cg12400025 | 6  | 111,913,206 | 4.83E-10 | 0.234 | 0.225 |          |       |  | <i>TRAF3IP2</i>  | Body    |
| cg25075794 | 7  | 30,951,392  | 6.22E-07 | 0.234 | 0.218 |          |       |  | <i>AQP1</i>      | TSS200  |
| cg25168494 | 2  | 63,286,355  | 3.85E-22 | 0.234 | 0.229 |          |       |  |                  |         |
| cg19868007 | 6  | 29,691,890  | 0.002253 | 0.234 | 0.232 |          |       |  | <i>HLA-F</i>     | Body    |
| cg26992010 | 15 | 89,951,870  | 0.000126 | 0.234 | 0.258 |          |       |  |                  |         |
| cg18771300 | 14 | 63,671,737  | 1.07E-06 | 0.234 | 0.205 | 3.1E-08  | 0.100 |  | <i>RHOJ</i>      | 1stExon |
| cg19024632 | 2  | 18,059,103  | 0.000846 | 0.234 | 0.124 |          |       |  | <i>KCNS3</i>     | TSS1500 |
| cg24000814 | 3  | 184,301,730 | 0.000406 | 0.234 | 0.219 |          |       |  |                  |         |
| cg25644224 | 7  | 158,195,876 | 3.26E-08 | 0.234 | 0.205 |          |       |  | <i>PTPRN2</i>    | Body    |
| cg20507963 | 4  | 13,541,863  | 0.008293 | 0.234 | 0.203 |          |       |  |                  |         |
| cg26711508 | 8  | 119,750,651 | 3.25E-05 | 0.234 | 0.235 |          |       |  |                  |         |
| cg02066681 | 21 | 46,823,800  | 3.76E-08 | 0.234 | 0.190 | 3.01E-23 | 0.174 |  | <i>COL18A1</i>   | TSS1500 |
| cg07204662 | 11 | 64,081,430  | 6.22E-21 | 0.234 | 0.271 |          |       |  | <i>ESRRA</i>     | Body    |
| cg09830083 | 5  | 131,561,058 | 3.03E-23 | 0.234 | 0.222 |          |       |  | <i>P4HA2</i>     | 5'UTR   |
| cg18789547 | 3  | 42,307,799  | 3.08E-07 | 0.234 | 0.231 |          |       |  | <i>CCK</i>       | TSS1500 |
| cg00046899 | 13 | 97,777,690  | 0.000839 | 0.234 | 0.243 |          |       |  |                  |         |
| cg03693105 | 7  | 151,108,340 | 1.66E-05 | 0.234 | 0.230 |          |       |  | <i>WDR86</i>     | TSS1500 |
| cg10135197 | 3  | 126,854,676 | 3.31E-10 | 0.234 | 0.204 |          |       |  |                  |         |
| cg10639585 | 12 | 130,387,131 | 0.006722 | 0.234 | 0.228 |          |       |  | <i>TMEM132D</i>  | Body    |
| cg24008577 | 3  | 62,353,504  | 0.007097 | 0.234 | 0.194 |          |       |  |                  |         |
| cg19285800 | 13 | 21,520,379  | 1.46E-06 | 0.234 | 0.210 |          |       |  |                  |         |
| cg25720804 | 5  | 170,736,389 | 0.009542 | 0.234 | 0.252 | 1.31E-13 | 0.239 |  | <i>TLX3</i>      | 1stExon |

|            |    |             |          |       |       |  |  |  |                  |         |
|------------|----|-------------|----------|-------|-------|--|--|--|------------------|---------|
| cg26113448 | 6  | 27,248,065  | 0.016178 | 0.234 | 0.199 |  |  |  |                  |         |
| cg07650504 | 12 | 48,397,055  | 0.001261 | 0.234 | 0.185 |  |  |  | <i>COL2A1</i>    | Body    |
| cg11571124 | 12 | 122,851,438 | 4.56E-06 | 0.234 | 0.188 |  |  |  | <i>CLIP1</i>     | Body    |
| cg16283208 | 11 | 59,323,398  | 0.000201 | 0.234 | 0.226 |  |  |  |                  |         |
| cg07451080 | 3  | 44,041,025  | 0.041762 | 0.234 | 0.209 |  |  |  |                  |         |
| cg03215422 | 5  | 135,266,509 | 8.91E-07 | 0.234 | 0.231 |  |  |  | <i>FBXL21</i>    | 5'UTR   |
| cg17705334 | 10 | 81,002,615  | 0.011184 | 0.234 | 0.154 |  |  |  | <i>ZMIZ1</i>     | Body    |
| cg04153740 | 16 | 54,971,018  | 0.014011 | 0.234 | 0.294 |  |  |  |                  |         |
| cg08111832 | 14 | 24,868,082  | 0.005339 | 0.234 | 0.114 |  |  |  | <i>NYNRIN</i>    | 1stExon |
| cg08549332 | 7  | 101,558,461 | 3.73E-32 | 0.234 | 0.230 |  |  |  | <i>CUX1</i>      | Body    |
| cg11308643 | 11 | 105,480,788 | 5.45E-05 | 0.234 | 0.213 |  |  |  | <i>GRIA4</i>     | TSS200  |
| cg14415629 | 11 | 33,033,607  | 3.69E-05 | 0.234 | 0.215 |  |  |  |                  |         |
| cg27152890 | 19 | 45,900,241  | 1.64E-15 | 0.234 | 0.228 |  |  |  | <i>PPP1R13L</i>  | Body    |
| cg13792913 | 11 | 118,026,593 | 1.52E-15 | 0.234 | 0.218 |  |  |  |                  |         |
| cg27405731 | 7  | 101,571,203 | 2.15E-14 | 0.234 | 0.210 |  |  |  | <i>CUX1</i>      | Body    |
| cg04105342 | 4  | 30,724,841  | 3.66E-10 | 0.234 | 0.232 |  |  |  | <i>PCDH7</i>     | 1stExon |
| cg14794298 | 11 | 13,336,674  | 3.64E-14 | 0.234 | 0.228 |  |  |  | <i>ARNTL</i>     | 5'UTR   |
| cg18964775 | 10 | 102,890,986 | 0.018618 | 0.234 | 0.155 |  |  |  | <i>TLX1</i>      | TSS200  |
| cg25828185 | 12 | 54,455,656  | 1.13E-05 | 0.234 | 0.184 |  |  |  | <i>FLJ12825</i>  | Body    |
| cg00253228 | 8  | 145,025,610 | 1.51E-07 | 0.234 | 0.226 |  |  |  | <i>PLEC1</i>     | Body    |
| cg15739913 | 3  | 4,722,338   | 5.1E-17  | 0.234 | 0.226 |  |  |  | <i>ITPR1</i>     | Body    |
| cg23758703 | 10 | 114,610,508 | 1.65E-05 | 0.234 | 0.275 |  |  |  | <i>LOC143188</i> | TSS200  |
| cg26109199 | 21 | 34,755,747  | 2.49E-08 | 0.234 | 0.262 |  |  |  |                  |         |
| cg14262955 | 9  | 132,114,769 | 5.07E-10 | 0.234 | 0.185 |  |  |  |                  |         |
| cg05915892 | 18 | 673,911     | 3.16E-07 | 0.234 | 0.253 |  |  |  | <i>ENOSF1</i>    | 3'UTR   |
| cg07243147 | 7  | 150,744,274 | 1.06E-09 | 0.234 | 0.201 |  |  |  | <i>ACCN3</i>     | TSS1500 |
| cg18522038 | 17 | 30,568,596  | 4.49E-05 | 0.234 | 0.239 |  |  |  |                  |         |
| cg19812432 | 17 | 19,351,904  | 1.33E-11 | 0.234 | 0.240 |  |  |  |                  |         |
| cg23734137 | 15 | 96,868,114  | 1.15E-07 | 0.234 | 0.217 |  |  |  | <i>NR2F2</i>     | TSS1500 |
| cg15759056 | 7  | 87,229,552  | 0.001519 | 0.234 | 0.171 |  |  |  | <i>ABCB1</i>     | 5'UTR   |
| cg07741192 | 16 | 4,690,013   | 2.47E-20 | 0.234 | 0.215 |  |  |  | <i>MGRN1</i>     | Body    |
| cg15684724 | 8  | 67,875,033  | 0.009563 | 0.234 | 0.204 |  |  |  |                  |         |
| cg02602182 | X  | 40,026,844  | 0.043343 | 0.234 | 0.274 |  |  |  | <i>BCOR</i>      | 5'UTR   |
| cg07208853 | 1  | 200,005,219 | 0.003315 | 0.234 | 0.272 |  |  |  | <i>NR5A2</i>     | Body    |

|            |    |             |          |       |       |          |       |  |                  |         |
|------------|----|-------------|----------|-------|-------|----------|-------|--|------------------|---------|
| cg13608733 | 11 | 8,228,022   | 1.4E-05  | 0.234 | 0.221 |          |       |  |                  |         |
| cg16170614 | 4  | 24,802,387  | 1.15E-08 | 0.234 | 0.219 |          |       |  | <i>SOD3</i>      | 3'UTR   |
| cg19952015 | 7  | 105,432,653 | 7.77E-09 | 0.234 | 0.227 |          |       |  | <i>ATXN7L1</i>   | Body    |
| cg04466549 | 8  | 23,567,747  | 1.57E-05 | 0.234 | 0.222 |          |       |  |                  |         |
| cg06793867 | 19 | 7,927,374   | 3.63E-08 | 0.234 | 0.206 |          |       |  | <i>EVI5L</i>     | Body    |
| cg23913995 | 20 | 21,490,665  | 0.014017 | 0.234 | 0.259 |          |       |  |                  |         |
| cg25890640 | 11 | 68,610,632  | 0.000102 | 0.234 | 0.225 |          |       |  | <i>CPT1A</i>     | TSS1500 |
| cg02732252 | 16 | 3,068,014   | 0.001626 | 0.234 | 0.254 |          |       |  | <i>CLDN6</i>     | 5'UTR   |
| cg04121415 | 3  | 38,325,566  | 3.42E-13 | 0.234 | 0.231 |          |       |  |                  |         |
| cg07847030 | 2  | 85,361,959  | 0.004815 | 0.234 | 0.259 |          |       |  | <i>TCF7L1</i>    | Body    |
| cg09784934 | 2  | 177,023,062 | 0.000425 | 0.234 | 0.268 |          |       |  |                  |         |
| cg25030888 | 1  | 67,156,909  | 2.99E-05 | 0.234 | 0.228 |          |       |  | <i>SGIP1</i>     | Body    |
| cg06133670 | 7  | 127,744,553 | 0.002815 | 0.234 | 0.207 |          |       |  |                  |         |
| cg08460812 | 4  | 109,087,419 | 9.73E-05 | 0.234 | 0.233 |          |       |  | <i>LOC641518</i> | TSS1500 |
| cg20034617 | 9  | 140,172,277 | 3.37E-07 | 0.234 | 0.222 |          |       |  | <i>C9orf167</i>  | TSS200  |
| cg15833534 | 1  | 31,845,985  | 0.007461 | 0.234 | 0.132 |          |       |  | <i>FABP3</i>     | TSS200  |
| cg02319318 | 8  | 81,639,711  | 0.007449 | 0.234 | 0.191 |          |       |  | <i>ZNF704</i>    | Body    |
| cg14751369 | 12 | 117,042,332 | 4.87E-05 | 0.234 | 0.238 |          |       |  |                  |         |
| cg24713122 | 11 | 46,389,164  | 1.22E-13 | 0.234 | 0.233 |          |       |  | <i>DGKZ</i>      | Body    |
| cg25298725 | 6  | 30,228,047  | 0.00247  | 0.234 | 0.205 |          |       |  | <i>HLA-L</i>     | Body    |
| cg06427054 | 4  | 54,963,174  | 7.58E-09 | 0.234 | 0.255 |          |       |  |                  |         |
| cg06854842 | 2  | 26,947,187  | 9.23E-20 | 0.234 | 0.212 |          |       |  | <i>KCNK3</i>     | Body    |
| cg23651826 | 11 | 115,630,531 | 0.001493 | 0.234 | 0.176 |          |       |  |                  |         |
| cg00328075 | 8  | 12,989,417  | 2.44E-07 | 0.234 | 0.189 |          |       |  | <i>DLC1</i>      | Body    |
| cg19401033 | 3  | 107,148,372 | 4.11E-05 | 0.234 | 0.203 |          |       |  |                  |         |
| cg23037133 | 13 | 97,646,811  | 0.006953 | 0.234 | 0.295 | 4.39E-19 | 0.223 |  | <i>OXGR1</i>     | TSS1500 |
| cg15333426 | 4  | 10,463,620  | 0.000613 | 0.234 | 0.252 |          |       |  |                  |         |
| cg10828904 | 10 | 126,703,991 | 0.000102 | 0.234 | 0.218 |          |       |  | <i>CTBP2</i>     | Body    |
| cg11898347 | Y  | 2,655,866   | 0.022781 | 0.234 | 0.256 |          |       |  | <i>SRY</i>       | TSS200  |
| cg00001583 | 1  | 200,011,786 | 0.039099 | 0.234 | 0.217 |          |       |  | <i>NR5A2</i>     | Body    |
| cg02689863 | 13 | 95,357,832  | 1.88E-05 | 0.234 | 0.214 |          |       |  |                  |         |
| cg08553437 | 4  | 122,686,456 | 0.018744 | 0.234 | 0.144 |          |       |  | <i>TMEM155</i>   | TSS200  |
| cg01081263 | 11 | 9,112,471   | 9.06E-09 | 0.234 | 0.168 | 1.41E-08 | 0.127 |  | <i>SCUBE2</i>    | Body    |
| cg22024120 | 6  | 30,696,029  | 0.003219 | 0.234 | 0.293 |          |       |  | <i>FLOT1</i>     | Body    |

|            |    |             |          |       |       |          |       |  |                 |         |
|------------|----|-------------|----------|-------|-------|----------|-------|--|-----------------|---------|
| cg00980581 | 6  | 36,238,095  | 0.000429 | 0.234 | 0.237 |          |       |  | <i>PNPLA1</i>   | 5'UTR   |
| cg09246103 | 1  | 8,456,466   | 0.000247 | 0.234 | 0.164 |          |       |  | <i>RERE</i>     | 5'UTR   |
| cg22480558 | 5  | 150,461,211 | 0.000524 | 0.234 | 0.178 |          |       |  | <i>TNIP1</i>    | TSS1500 |
| cg03241909 | 11 | 64,952,034  | 4.41E-11 | 0.234 | 0.224 |          |       |  | <i>CAPN1</i>    | Body    |
| cg09718037 | 12 | 117,042,854 | 0.007673 | 0.234 | 0.238 |          |       |  |                 |         |
| cg21878149 | 1  | 221,052,023 | 0.007149 | 0.234 | 0.222 |          |       |  | <i>HLX</i>      | TSS1500 |
| cg20972142 | 19 | 20,189,112  | 0.001735 | 0.234 | 0.220 |          |       |  | <i>ZNF90</i>    | Body    |
| cg23553576 | 11 | 85,451,557  | 0.000238 | 0.234 | 0.166 |          |       |  | <i>SYTL2</i>    | Body    |
| cg01300317 | 12 | 110,316,883 | 4.43E-06 | 0.234 | 0.202 |          |       |  | <i>GLTP</i>     | Body    |
| cg20963227 | 4  | 41,868,203  | 3.16E-05 | 0.234 | 0.219 |          |       |  |                 |         |
| cg00723997 | X  | 48,690,473  | 0.020721 | 0.234 | 0.303 |          |       |  | <i>PCSK1N</i>   | Body    |
| cg12897164 | 8  | 124,529,273 | 4.95E-05 | 0.234 | 0.236 |          |       |  | <i>FBXO32</i>   | 5'UTR   |
| cg00022997 | 6  | 31,650,808  | 8.6E-07  | 0.234 | 0.276 |          |       |  |                 |         |
| cg06492372 | 2  | 97,573,176  | 0.014078 | 0.234 | 0.234 |          |       |  | <i>FAM178B</i>  | Body    |
| cg13547644 | 1  | 229,569,608 | 0.000588 | 0.234 | 0.240 | 4.28E-14 | 0.217 |  | <i>ACTA1</i>    | 5'UTR   |
| cg19784721 | 10 | 126,043,521 | 0.000439 | 0.234 | 0.166 |          |       |  |                 |         |
| cg24932585 | 19 | 12,666,317  | 3.5E-06  | 0.234 | 0.235 |          |       |  |                 |         |
| cg05580671 | 8  | 38,006,196  | 0.022285 | 0.234 | 0.234 |          |       |  | <i>STAR</i>     | Body    |
| cg15393275 | 2  | 45,165,193  | 0.000483 | 0.234 | 0.230 |          |       |  |                 |         |
| cg24458609 | 11 | 56,948,015  | 0.012624 | 0.234 | 0.236 |          |       |  | <i>LRRC55</i>   | TSS1500 |
| cg25149238 | 2  | 45,030,384  | 2.08E-05 | 0.234 | 0.242 |          |       |  |                 |         |
| cg27065254 | 17 | 71,289,332  | 5.87E-13 | 0.234 | 0.222 |          |       |  | <i>CDC42EP4</i> | 5'UTR   |
| cg03740162 | 9  | 1,050,680   | 0.022698 | 0.234 | 0.251 |          |       |  | <i>DMRT2</i>    | 1stExon |
| cg06193628 | 2  | 228,526,145 | 1E-09    | 0.234 | 0.226 |          |       |  |                 |         |
| cg06984848 | 16 | 85,320,722  | 1.06E-18 | 0.234 | 0.210 |          |       |  |                 |         |
| cg08310837 | 16 | 67,572,860  | 2.82E-07 | 0.234 | 0.207 |          |       |  | <i>FAM65A</i>   | Body    |
| cg16736018 | 1  | 156,661,648 | 1.13E-14 | 0.234 | 0.219 |          |       |  |                 |         |
| cg23657099 | 7  | 1,102,138   | 7.75E-15 | 0.234 | 0.231 |          |       |  | <i>C7orf50</i>  | Body    |
| cg19651341 | 4  | 8,012,338   | 2.85E-05 | 0.234 | 0.194 |          |       |  | <i>ABLIM2</i>   | Body    |
| cg27177983 | 4  | 25,033,126  | 0.005741 | 0.234 | 0.201 |          |       |  | <i>LGI2</i>     | TSS1500 |
| cg17929951 | 20 | 44,746,681  | 0.003757 | 0.234 | 0.313 |          |       |  | <i>CD40</i>     | TSS1500 |
| cg21871232 | 14 | 95,693,881  | 2.88E-05 | 0.234 | 0.157 |          |       |  | <i>CLMN</i>     | Body    |
| cg23146833 | 3  | 171,175,866 | 5.99E-06 | 0.234 | 0.264 |          |       |  | <i>TNIK</i>     | Body    |
| cg11616547 | 6  | 28,782,301  | 0.015819 | 0.234 | 0.253 |          |       |  |                 |         |

|            |    |             |          |       |       |          |       |  |     |                 |         |
|------------|----|-------------|----------|-------|-------|----------|-------|--|-----|-----------------|---------|
| cg02407720 | 6  | 10,421,372  | 6.89E-05 | 0.234 | 0.267 |          |       |  |     |                 |         |
| cg04314652 | 16 | 69,597,925  | 8.47E-08 | 0.234 | 0.216 |          |       |  |     | <i>NFAT5</i>    | TSS1500 |
| cg04940329 | 17 | 39,093,054  | 8E-08    | 0.234 | 0.216 |          |       |  |     | <i>KRT23</i>    | 5'UTR   |
| cg16732175 | 19 | 49,250,180  | 0.002195 | 0.234 | 0.246 |          |       |  |     | <i>IZUMO1</i>   | TSS200  |
| cg12235788 | 3  | 123,476,518 | 1.37E-11 | 0.234 | 0.180 |          |       |  |     | <i>MYLK</i>     | Body    |
| cg17176619 | 13 | 99,218,657  | 3.23E-15 | 0.234 | 0.227 |          |       |  |     | <i>STK24</i>    | Body    |
| cg19474865 | 11 | 83,733,268  | 0.002681 | 0.234 | 0.217 |          |       |  |     | <i>DLG2</i>     | Body    |
| cg00456299 | 1  | 22,677,736  | 0.00239  | 0.234 | 0.187 |          |       |  |     |                 |         |
| cg07828024 | 6  | 149,772,892 | 2.56E-16 | 0.234 | 0.222 |          |       |  |     | <i>ZC3H12D</i>  | Body    |
| cg17351439 | 13 | 93,888,067  | 2.08E-05 | 0.234 | 0.253 |          |       |  |     | <i>GPC6</i>     | Body    |
| cg07160932 | 16 | 29,888,733  | 1.94E-06 | 0.234 | 0.238 |          |       |  |     | <i>SEZ6L2</i>   | Body    |
| cg08743812 | 5  | 71,014,736  | 0.020129 | 0.234 | 0.279 |          |       |  |     | <i>CARTPT</i>   | TSS1500 |
| cg08844701 | 6  | 27,064,705  | 2.77E-05 | 0.234 | 0.181 |          |       |  |     |                 |         |
| cg13234863 | 12 | 130,389,138 | 3.13E-05 | 0.234 | 0.202 | 5.38E-23 | 0.221 |  |     | <i>TMEM132D</i> | TSS1500 |
| cg06555468 | 7  | 2,094,790   | 1.02E-07 | 0.234 | 0.212 |          |       |  |     | <i>MAD1L1</i>   | Body    |
| cg08387426 | 16 | 14,042,426  | 5.51E-14 | 0.234 | 0.226 |          |       |  |     | <i>ERCC4</i>    | 3'UTR   |
| cg16674484 | 5  | 149,887,497 | 3.41E-13 | 0.234 | 0.214 |          |       |  |     | <i>NDST1</i>    | TSS200  |
| cg14870539 | 5  | 150,530,752 | 5.24E-09 | 0.234 | 0.224 |          |       |  |     | <i>ANXA6</i>    | 5'UTR   |
| cg03763518 | 1  | 150,245,044 | 9.12E-07 | 0.234 | 0.232 |          |       |  |     | <i>C1orf54</i>  | TSS200  |
| cg05093169 | 11 | 71,955,401  | 0.005074 | 0.234 | 0.302 |          |       |  |     | <i>PHOX2A</i>   | TSS200  |
| cg14115756 | 9  | 125,795,935 | 4.39E-14 | 0.234 | 0.232 |          |       |  |     | <i>GPR21</i>    | TSS1500 |
| cg24645671 | 7  | 42,656,871  | 1.6E-15  | 0.234 | 0.212 |          |       |  |     |                 |         |
| cg15849864 | 15 | 73,661,642  | 3.02E-07 | 0.233 | 0.242 |          |       |  |     | <i>HCN4</i>     | TSS200  |
| cg01955203 | 8  | 124,515,502 | 4.77E-11 | 0.233 | 0.241 |          |       |  |     | <i>FBXO32</i>   | 3'UTR   |
| cg05685892 | 6  | 30,421,091  | 1E-16    | 0.233 | 0.212 |          |       |  |     |                 |         |
| cg19002462 | 11 | 36,036,892  | 1.7E-10  | 0.233 | 0.227 |          |       |  |     | <i>LDLRAD3</i>  | Body    |
| cg23058435 | 14 | 36,983,949  | 0.00013  | 0.233 | 0.260 |          |       |  |     | <i>SFTA3</i>    | TSS1500 |
| cg02532824 | 6  | 108,444,810 | 4.52E-06 | 0.233 | 0.241 |          |       |  | Yes |                 |         |
| cg13816321 | 9  | 973,198     | 1.56E-06 | 0.233 | 0.257 |          |       |  |     |                 |         |
| cg00160583 | 1  | 32,167,512  | 3.74E-11 | 0.233 | 0.219 |          |       |  |     | <i>COL16A1</i>  | Body    |
| cg26416466 | 15 | 66,546,708  | 5.54E-07 | 0.233 | 0.234 | 1.84E-19 | 0.173 |  |     | <i>MEGF11</i>   | TSS1500 |
| cg02856768 | 12 | 94,385,202  | 3.7E-12  | 0.233 | 0.237 |          |       |  | Yes |                 |         |
| cg22132508 | 3  | 138,658,878 | 0.009872 | 0.233 | 0.271 |          |       |  |     |                 |         |
| cg05706696 | X  | 129,254,556 | 0.000128 | 0.233 | 0.219 |          |       |  |     |                 |         |

|            |    |             |          |       |       |            |       |  |                 |         |
|------------|----|-------------|----------|-------|-------|------------|-------|--|-----------------|---------|
| cg02963248 | 2  | 66,809,780  | 1.18E-05 | 0.233 | 0.234 |            |       |  |                 |         |
| cg10043155 | 6  | 25,218,855  | 5.95E-06 | 0.233 | 0.208 |            |       |  |                 |         |
| cg02318527 | 19 | 41,318,069  | 4.74E-05 | 0.233 | 0.200 |            |       |  |                 |         |
| cg06306751 | X  | 154,251,005 | 6.1E-07  | 0.233 | 0.285 | 0.01106387 | 0.056 |  | <i>F8</i>       | TSS200  |
| cg05635036 | 12 | 110,149,962 | 4.3E-09  | 0.233 | 0.227 |            |       |  |                 |         |
| cg00379467 | 4  | 148,401,873 | 7.69E-18 | 0.233 | 0.230 |            |       |  | <i>EDNRA</i>    | TSS200  |
| cg01965552 | 5  | 40,478,425  | 1.6E-07  | 0.233 | 0.172 |            |       |  |                 |         |
| cg04856896 | 1  | 32,665,450  | 4E-16    | 0.233 | 0.212 |            |       |  | <i>CCDC28B</i>  | TSS1500 |
| cg24472574 | 10 | 103,070,503 | 0.001084 | 0.233 | 0.212 |            |       |  |                 |         |
| cg00960305 | 20 | 22,558,297  | 7.9E-05  | 0.233 | 0.198 |            |       |  | <i>C20orf56</i> | Body    |
| cg15992730 | 12 | 7,848,093   | 0.038327 | 0.233 | 0.276 | 0.00063329 | 0.114 |  | <i>GDF3</i>     | 1stExon |
| cg26021627 | 8  | 53,478,706  | 0.003982 | 0.233 | 0.188 | 1.44E-25   | 0.189 |  | <i>FAM150A</i>  | TSS1500 |
| cg27508055 | 2  | 19,286,187  | 7.62E-13 | 0.233 | 0.234 |            |       |  |                 |         |
| cg05420057 | 17 | 36,721,297  | 2.06E-06 | 0.233 | 0.228 |            |       |  | <i>SRCIN1</i>   | Body    |
| cg16334795 | 21 | 42,538,894  | 2.52E-06 | 0.233 | 0.189 | 0.00000182 | 0.151 |  | <i>BACE2</i>    | TSS1500 |
| cg19805005 | 17 | 50,234,775  | 0.027063 | 0.233 | 0.196 |            |       |  | <i>CA10</i>     | Body    |
| cg25116388 | 17 | 46,692,422  | 0.00051  | 0.233 | 0.270 |            |       |  | <i>HOXB8</i>    | TSS200  |
| cg07655487 | 11 | 66,849,820  | 0.001154 | 0.233 | 0.177 |            |       |  |                 |         |
| cg08669447 | 19 | 44,203,749  | 0.01563  | 0.233 | 0.113 |            |       |  |                 |         |
| cg20504791 | 20 | 22,562,478  | 0.028852 | 0.233 | 0.239 |            |       |  | <i>FOXA2</i>    | 3'UTR   |
| cg02223323 | X  | 20,134,399  | 4.02E-07 | 0.233 | 0.239 |            |       |  | <i>MAP7D2</i>   | Body    |
| cg04967578 | 18 | 13,641,894  | 5.58E-06 | 0.233 | 0.199 |            |       |  | <i>C18orf1</i>  | Body    |
| cg07480090 | 6  | 29,818,230  | 0.017427 | 0.233 | 0.263 |            |       |  |                 |         |
| cg02652597 | 2  | 85,811,292  | 7.28E-07 | 0.233 | 0.250 |            |       |  | <i>VAMP5</i>    | TSS1500 |
| cg17618327 | 7  | 2,143,942   | 0.000132 | 0.233 | 0.253 |            |       |  | <i>MAD1L1</i>   | Body    |
| cg23677000 | 19 | 35,773,317  | 0.003466 | 0.233 | 0.239 |            |       |  | <i>HAMP</i>     | TSS200  |
| cg01458510 | 2  | 109,752,622 | 6.47E-30 | 0.233 | 0.220 |            |       |  | <i>SH3RF3</i>   | Body    |
| cg05413277 | 2  | 74,642,087  | 3.79E-06 | 0.233 | 0.196 |            |       |  | <i>C2orf81</i>  | Body    |
| cg18366919 | 19 | 15,344,364  | 1.04E-09 | 0.233 | 0.227 |            |       |  | <i>EPHX3</i>    | TSS1500 |
| cg24119607 | 5  | 139,047,739 | 1.61E-08 | 0.233 | 0.244 |            |       |  | <i>CXXC5</i>    | 5'UTR   |
| cg07211259 | 9  | 5,510,497   | 0.001792 | 0.233 | 0.150 | 8.63E-14   | 0.121 |  | <i>PDCD1LG2</i> | TSS200  |
| cg10950028 | 1  | 110,230,633 | 4.43E-08 | 0.233 | 0.215 |            |       |  | <i>GSTM1</i>    | Body    |
| cg13969001 | 1  | 18,958,084  | 0.032267 | 0.233 | 0.278 |            |       |  | <i>PAX7</i>     | 5'UTR   |
| cg20462512 | 12 | 5,543,155   | 2.55E-07 | 0.233 | 0.226 |            |       |  | <i>NTF3</i>     | Body    |

|            |    |             |          |       |       |          |       |  |                 |         |
|------------|----|-------------|----------|-------|-------|----------|-------|--|-----------------|---------|
| cg04228935 | 21 | 36,399,258  | 0.011041 | 0.233 | 0.277 |          |       |  | <i>RUNX1</i>    | Body    |
| cg17787134 | 17 | 47,073,522  | 0.040636 | 0.233 | 0.239 |          |       |  | <i>IGF2BP1</i>  | TSS1500 |
| cg03900378 | 8  | 54,442,083  | 5.4E-07  | 0.233 | 0.214 |          |       |  |                 |         |
| cg04290586 | 12 | 108,168,987 | 2.52E-05 | 0.233 | 0.181 |          |       |  | <i>ASCL4</i>    | 1stExon |
| cg12324970 | 10 | 104,000,446 | 2.11E-07 | 0.233 | 0.218 |          |       |  | <i>PITX3</i>    | 5'UTR   |
| cg13084731 | 7  | 20,834,411  | 0.000296 | 0.233 | 0.179 |          |       |  |                 |         |
| cg06959514 | 6  | 29,856,141  | 0.001373 | 0.233 | 0.193 |          |       |  | <i>HLA-H</i>    | Body    |
| cg26848718 | 11 | 32,454,975  | 0.004022 | 0.233 | 0.201 |          |       |  | <i>WT1</i>      | Body    |
| cg02490989 | 8  | 17,271,322  | 0.00069  | 0.233 | 0.190 |          |       |  | <i>MTMR7</i>    | TSS1500 |
| cg04267526 | 10 | 109,674,297 | 1.95E-07 | 0.233 | 0.207 |          |       |  |                 |         |
| cg06849477 | 22 | 45,072,724  | 2.16E-14 | 0.233 | 0.229 | 2.43E-39 | 0.158 |  | <i>PRR5</i>     | 5'UTR   |
| cg22768487 | 22 | 46,770,253  | 9.69E-08 | 0.233 | 0.217 |          |       |  | <i>CELSR1</i>   | Body    |
| cg04481923 | 5  | 135,416,205 | 0.004422 | 0.233 | 0.259 |          |       |  | <i>MIR886</i>   | Body    |
| cg15832662 | 11 | 63,448,437  | 0.000445 | 0.233 | 0.133 |          |       |  | <i>RTN3</i>     | TSS1500 |
| cg19913563 | 6  | 30,720,261  | 0.002184 | 0.233 | 0.099 |          |       |  |                 |         |
| cg20629315 | 2  | 43,685,377  | 5.13E-09 | 0.233 | 0.246 |          |       |  | <i>THADA</i>    | Body    |
| cg22627406 | 19 | 10,958,968  | 9.44E-09 | 0.233 | 0.233 |          |       |  | <i>C19orf38</i> | TSS200  |
| cg03595533 | 6  | 28,784,788  | 0.036112 | 0.233 | 0.302 |          |       |  |                 |         |
| cg05228186 | 11 | 83,393,344  | 0.00206  | 0.233 | 0.202 |          |       |  | <i>DLG2</i>     | 1stExon |
| cg08638180 | 16 | 67,283,238  | 7.63E-07 | 0.233 | 0.133 |          |       |  | <i>SLC9A5</i>   | Body    |
| cg09864245 | 11 | 33,746,426  | 0.000179 | 0.233 | 0.227 |          |       |  | <i>CD59</i>     | 5'UTR   |
| cg23669081 | 17 | 46,685,353  | 3.29E-07 | 0.233 | 0.235 |          |       |  | <i>HOXB7</i>    | Body    |
| cg25383605 | 6  | 155,538,047 | 5.81E-08 | 0.233 | 0.184 |          |       |  | <i>TIAM2</i>    | Body    |
| cg06844526 | 2  | 192,169,585 | 0.005526 | 0.233 | 0.146 |          |       |  | <i>MYO1B</i>    | Body    |
| cg13480549 | 1  | 2,058,790   | 1.5E-08  | 0.233 | 0.199 |          |       |  | <i>PRKCZ</i>    | 5'UTR   |
| cg17918937 | 15 | 64,992,780  | 8.67E-16 | 0.233 | 0.240 |          |       |  | <i>OAZ2</i>     | Body    |
| cg18576957 | 6  | 31,651,020  | 0.01845  | 0.233 | 0.283 |          |       |  |                 |         |
| cg22632523 | 10 | 3,711,048   | 0.008189 | 0.233 | 0.106 |          |       |  |                 |         |
| cg02567119 | 10 | 102,891,045 | 0.035974 | 0.233 | 0.160 |          |       |  | <i>TLX1</i>     | TSS200  |
| cg00831237 | 12 | 50,344,289  | 1.73E-08 | 0.233 | 0.199 |          |       |  | <i>AQP2</i>     | TSS1500 |
| cg01363734 | 12 | 117,482,953 | 1.49E-08 | 0.233 | 0.163 |          |       |  | <i>TESC</i>     | Body    |
| cg10663316 | 12 | 124,702,334 | 0.014299 | 0.233 | 0.071 |          |       |  |                 |         |
| cg23532454 | 14 | 75,910,026  | 2.61E-08 | 0.233 | 0.228 |          |       |  | <i>JDP2</i>     | Body    |
| cg24161018 | 7  | 131,847,456 | 1.22E-13 | 0.233 | 0.225 |          |       |  | <i>PLXNA4</i>   | Body    |



|            |    |             |          |       |       |  |  |  |                  |         |
|------------|----|-------------|----------|-------|-------|--|--|--|------------------|---------|
| cg04925129 | 3  | 149,247,133 | 5.04E-16 | 0.233 | 0.253 |  |  |  | <i>WWTR1</i>     | Body    |
| cg06642219 | 1  | 5,586,147   | 0.002658 | 0.233 | 0.181 |  |  |  |                  |         |
| cg17315500 | 12 | 103,359,572 | 0.010382 | 0.233 | 0.179 |  |  |  |                  |         |
| cg00351537 | 19 | 7,580,275   | 8.15E-11 | 0.233 | 0.217 |  |  |  | <i>ZNF358</i>    | TSS1500 |
| cg10500737 | 21 | 17,566,381  | 0.000416 | 0.233 | 0.171 |  |  |  | <i>C21orf34</i>  | Body    |
| cg02039815 | 2  | 224,904,724 | 9.74E-06 | 0.233 | 0.148 |  |  |  | <i>SERPINE2</i>  | TSS1500 |
| cg09473315 | 17 | 76,228,233  | 7.98E-06 | 0.233 | 0.236 |  |  |  | <i>LOC283999</i> | Body    |
| cg13035268 | 7  | 103,085,736 | 3.24E-06 | 0.233 | 0.217 |  |  |  | <i>SLC26A5</i>   | 5'UTR   |
| cg04709035 | 2  | 468,737     | 1.86E-06 | 0.233 | 0.229 |  |  |  |                  |         |
| cg06496666 | 16 | 87,241,473  | 2.3E-05  | 0.233 | 0.180 |  |  |  |                  |         |
| cg01320579 | 17 | 75,405,842  | 1.89E-08 | 0.233 | 0.236 |  |  |  | <i>SEPT9</i>     | Body    |
| cg08640475 | 16 | 85,551,478  | 1.6E-63  | 0.233 | 0.228 |  |  |  |                  |         |
| cg21249595 | 6  | 30,848,811  | 2.78E-12 | 0.233 | 0.215 |  |  |  |                  |         |
| cg00733978 | 7  | 80,352,237  | 1.41E-05 | 0.233 | 0.163 |  |  |  |                  |         |
| cg04007303 | 9  | 100,618,041 | 2.17E-05 | 0.233 | 0.208 |  |  |  | <i>FOXE1</i>     | 3'UTR   |
| cg05379634 | 19 | 1,856,726   | 4.7E-07  | 0.233 | 0.216 |  |  |  | <i>KLF16</i>     | Body    |
| cg07781736 | 20 | 55,839,008  | 0.00657  | 0.233 | 0.227 |  |  |  | <i>BMP7</i>      | Body    |
| cg11089489 | 14 | 37,124,313  | 2.91E-05 | 0.233 | 0.221 |  |  |  |                  |         |
| cg14720024 | 5  | 115,697,696 | 2.18E-09 | 0.233 | 0.237 |  |  |  |                  |         |
| cg17504999 | 4  | 134,072,723 | 0.036716 | 0.233 | 0.225 |  |  |  | <i>PCDH10</i>    | 1stExon |
| cg07799299 | 8  | 131,344,855 | 2.57E-15 | 0.233 | 0.236 |  |  |  | <i>ASAP1</i>     | Body    |
| cg08064488 | 21 | 38,068,043  | 0.0124   | 0.233 | 0.257 |  |  |  |                  |         |
| cg10982443 | 14 | 20,903,611  | 9.61E-08 | 0.233 | 0.246 |  |  |  | <i>KLHL33</i>    | 5'UTR   |
| cg27441486 | 1  | 201,708,522 | 0.006894 | 0.233 | 0.156 |  |  |  | <i>NAV1</i>      | TSS1500 |
| cg06715672 | X  | 136,655,987 | 0.02594  | 0.233 | 0.219 |  |  |  |                  |         |
| cg02953559 | 3  | 123,164,964 | 1.43E-14 | 0.233 | 0.237 |  |  |  | <i>ADCY5</i>     | Body    |
| cg06640763 | 7  | 149,473,097 | 0.001553 | 0.233 | 0.179 |  |  |  | <i>SSPO</i>      | TSS200  |
| cg13508369 | 9  | 129,884,026 | 7.49E-15 | 0.233 | 0.214 |  |  |  | <i>ANGPTL2</i>   | 5'UTR   |
| cg24611608 | 8  | 72,274,615  | 0.019192 | 0.233 | 0.314 |  |  |  | <i>EYA1</i>      | TSS200  |
| cg00760014 | 1  | 19,267,827  | 0.006059 | 0.233 | 0.123 |  |  |  | <i>IFFO2</i>     | Body    |
| cg06126019 | 11 | 9,253,566   | 3.62E-07 | 0.233 | 0.234 |  |  |  | <i>DENND5A</i>   | Body    |
| cg04271801 | 6  | 26,272,516  | 4.37E-05 | 0.233 | 0.252 |  |  |  | <i>HIST1H3G</i>  | TSS1500 |
| cg10732611 | 13 | 33,700,592  | 0.000646 | 0.233 | 0.214 |  |  |  | <i>STARD13</i>   | Body    |
| cg12214003 | 2  | 235,859,792 | 1.8E-05  | 0.233 | 0.199 |  |  |  | <i>SH3BP4</i>    | TSS1500 |

|            |    |             |          |       |       |  |  |  |                |         |
|------------|----|-------------|----------|-------|-------|--|--|--|----------------|---------|
| cg01948226 | 6  | 32,829,208  | 0.005496 | 0.233 | 0.185 |  |  |  |                |         |
| cg10140794 | 5  | 36,066,972  | 0.000349 | 0.233 | 0.227 |  |  |  | <i>UGT3A2</i>  | 1stExon |
| cg13694466 | 10 | 13,382,122  | 5.17E-12 | 0.233 | 0.235 |  |  |  | <i>SEPHS1</i>  | Body    |
| cg18738190 | 10 | 73,740,291  | 2.42E-09 | 0.233 | 0.228 |  |  |  | <i>CHST3</i>   | 5'UTR   |
| cg07065111 | 2  | 5,831,213   | 0.002513 | 0.233 | 0.243 |  |  |  |                |         |
| cg19458787 | 5  | 173,116,776 | 0.002868 | 0.233 | 0.137 |  |  |  |                |         |
| cg21139046 | 3  | 14,339,700  | 4.63E-07 | 0.233 | 0.252 |  |  |  |                |         |
| cg07676145 | 10 | 73,506,646  | 1.29E-08 | 0.233 | 0.234 |  |  |  | <i>CDH23</i>   | Body    |
| cg08369810 | 3  | 194,522,571 | 4.82E-05 | 0.233 | 0.214 |  |  |  |                |         |
| cg13300710 | 11 | 45,167,419  | 0.001009 | 0.233 | 0.260 |  |  |  | <i>PRDM11</i>  | Body    |
| cg02766845 | 6  | 28,956,577  | 0.013008 | 0.233 | 0.223 |  |  |  |                |         |
| cg16967578 | 1  | 218,575,437 | 7.92E-05 | 0.233 | 0.234 |  |  |  | <i>TGFB2</i>   | Body    |
| cg18273412 | 10 | 93,647,857  | 2.29E-07 | 0.233 | 0.207 |  |  |  |                |         |
| cg26224060 | 5  | 94,957,243  | 0.000263 | 0.233 | 0.195 |  |  |  | <i>GPR150</i>  | 1stExon |
| cg08507136 | 8  | 28,515,641  | 4.42E-05 | 0.233 | 0.177 |  |  |  |                |         |
| cg15534755 | 11 | 117,069,859 | 1.01E-09 | 0.233 | 0.235 |  |  |  | <i>TAGLN</i>   | TSS200  |
| cg23283423 | 17 | 821,546     | 6.6E-05  | 0.233 | 0.190 |  |  |  | <i>NXN</i>     | Body    |
| cg02109162 | 15 | 99,646,443  | 0.000582 | 0.233 | 0.180 |  |  |  | <i>SYNM</i>    | Body    |
| cg17284168 | 6  | 134,491,531 | 1.69E-19 | 0.233 | 0.233 |  |  |  | <i>SGK1</i>    | Body    |
| cg17611046 | 6  | 5,672,954   | 1.72E-07 | 0.233 | 0.210 |  |  |  | <i>FARS2</i>   | Body    |
| cg01687189 | 12 | 102,225,365 | 1.46E-12 | 0.233 | 0.214 |  |  |  | <i>GNPTAB</i>  | TSS1500 |
| cg07069844 | 19 | 1,617,027   | 1.43E-08 | 0.233 | 0.293 |  |  |  | <i>TCF3</i>    | Body    |
| cg15980076 | 10 | 94,822,747  | 2.71E-10 | 0.233 | 0.200 |  |  |  | <i>CYP26C1</i> | Body    |
| cg02805106 | 15 | 90,039,409  | 3.87E-07 | 0.233 | 0.239 |  |  |  | <i>RHCG</i>    | Body    |
| cg07956751 | 7  | 150,211,939 | 0.000493 | 0.233 | 0.206 |  |  |  | <i>GIMAP7</i>  | TSS200  |
| cg19333507 | 10 | 116,852,186 | 0.009832 | 0.233 | 0.099 |  |  |  | <i>ATRNL1</i>  | TSS1500 |
| cg07302677 | 7  | 128,550,862 | 3.02E-18 | 0.233 | 0.221 |  |  |  | <i>KCP</i>     | TSS200  |
| cg20813996 | 6  | 166,422,741 | 0.006227 | 0.233 | 0.257 |  |  |  |                |         |
| cg00062245 | 17 | 42,462,260  | 0.000519 | 0.233 | 0.241 |  |  |  | <i>ITGA2B</i>  | Body    |
| cg04421348 | 10 | 82,299,737  | 2.13E-07 | 0.233 | 0.248 |  |  |  | <i>SH2D4B</i>  | TSS1500 |
| cg13587180 | 4  | 42,403,248  | 4.62E-12 | 0.233 | 0.225 |  |  |  | <i>SHISA3</i>  | Body    |
| cg24437535 | 1  | 150,121,441 | 0.004819 | 0.233 | 0.122 |  |  |  | <i>PLEKHO1</i> | TSS1500 |
| cg25890168 | 18 | 19,262,819  | 0.012944 | 0.233 | 0.212 |  |  |  | <i>ABHD3</i>   | Body    |
| cg15666214 | 6  | 108,438,316 | 0.00089  | 0.233 | 0.245 |  |  |  |                |         |

|            |    |             |          |       |       |  |  |  |                 |         |
|------------|----|-------------|----------|-------|-------|--|--|--|-----------------|---------|
| cg00532411 | 1  | 6,241,506   | 2.4E-07  | 0.233 | 0.193 |  |  |  | <i>CHD5</i>     | TSS1500 |
| cg05134426 | 5  | 124,080,479 | 7.11E-05 | 0.233 | 0.267 |  |  |  | <i>ZNF608</i>   | 1stExon |
| cg10486820 | 6  | 51,972,234  | 1.32E-09 | 0.233 | 0.210 |  |  |  |                 |         |
| cg19416417 | 2  | 223,290,324 | 1.86E-14 | 0.233 | 0.220 |  |  |  | <i>SGPP2</i>    | Body    |
| cg22900229 | 2  | 25,391,773  | 0.005231 | 0.233 | 0.180 |  |  |  | <i>POMC</i>     | TSS1500 |
| cg02285386 | 22 | 35,695,157  | 4.92E-14 | 0.233 | 0.217 |  |  |  | <i>TOM1</i>     | TSS1500 |
| cg20193363 | 2  | 947,589     | 4.95E-06 | 0.233 | 0.170 |  |  |  | <i>SNTG2</i>    | Body    |
| cg16136262 | 1  | 169,429,604 | 8.38E-05 | 0.233 | 0.218 |  |  |  |                 |         |
| cg17828689 | 3  | 136,539,113 | 0.016694 | 0.233 | 0.088 |  |  |  | <i>TMEM22</i>   | 5'UTR   |
| cg21890423 | 3  | 55,395,559  | 1.26E-06 | 0.233 | 0.245 |  |  |  |                 |         |
| cg09736968 | 2  | 233,351,609 | 0.041997 | 0.233 | 0.179 |  |  |  | <i>ECEL1</i>    | 5'UTR   |
| cg04929703 | 1  | 91,300,390  | 0.00632  | 0.233 | 0.302 |  |  |  |                 |         |
| cg12935170 | 7  | 23,508,189  | 0.041194 | 0.233 | 0.254 |  |  |  | <i>IGF2BP3</i>  | Body    |
| cg12980549 | 7  | 158,084,782 | 1.17E-24 | 0.233 | 0.223 |  |  |  | <i>PTPRN2</i>   | Body    |
| cg19781462 | 12 | 124,744,261 | 0.000583 | 0.233 | 0.272 |  |  |  |                 |         |
| cg25614364 | 4  | 129,747,274 | 3.72E-14 | 0.233 | 0.234 |  |  |  | <i>PHF17</i>    | 5'UTR   |
| cg15679892 | 7  | 1,267,057   | 2.11E-10 | 0.233 | 0.235 |  |  |  |                 |         |
| cg22510727 | 12 | 64,541,117  | 5.35E-10 | 0.233 | 0.229 |  |  |  | <i>SRGAP1</i>   | 3'UTR   |
| cg09484032 | 12 | 54,329,854  | 2.36E-09 | 0.233 | 0.226 |  |  |  |                 |         |
| cg15095906 | 1  | 36,789,786  | 4.47E-05 | 0.233 | 0.194 |  |  |  | <i>FAM176B</i>  | TSS200  |
| cg21706229 | 17 | 70,112,877  | 5.37E-06 | 0.233 | 0.212 |  |  |  |                 |         |
| cg24927800 | 2  | 220,283,214 | 0.015595 | 0.233 | 0.144 |  |  |  | <i>DES</i>      | 1stExon |
| cg11401568 | 17 | 19,648,157  | 0.000288 | 0.233 | 0.241 |  |  |  | <i>ALDH3A1</i>  | Body    |
| cg25884399 | 9  | 139,237,461 | 0.043194 | 0.233 | 0.258 |  |  |  | <i>GPSM1</i>    | Body    |
| cg09978996 | 10 | 70,321,668  | 2.72E-05 | 0.233 | 0.239 |  |  |  | <i>TET1</i>     | 5'UTR   |
| cg17744078 | 5  | 171,023,504 | 5.34E-07 | 0.233 | 0.220 |  |  |  |                 |         |
| cg13903070 | 1  | 61,456,527  | 1.2E-06  | 0.232 | 0.211 |  |  |  |                 |         |
| cg24082677 | 5  | 38,105,272  | 5.91E-09 | 0.232 | 0.221 |  |  |  |                 |         |
| cg26819718 | 10 | 77,872,170  | 1.63E-11 | 0.232 | 0.197 |  |  |  | <i>C10orf11</i> | Body    |
| cg05532178 | 10 | 70,979,827  | 2.28E-07 | 0.232 | 0.253 |  |  |  | <i>HKDC1</i>    | TSS1500 |
| cg09028008 | 1  | 19,615,080  | 2.74E-08 | 0.232 | 0.166 |  |  |  | <i>AKR7A3</i>   | 1stExon |
| cg12883279 | 6  | 32,120,773  | 9.32E-05 | 0.232 | 0.270 |  |  |  | <i>PPT2</i>     | TSS1500 |
| cg27441045 | X  | 100,446,383 | 2.83E-13 | 0.232 | 0.236 |  |  |  |                 |         |
| cg22160000 | 1  | 45,252,019  | 0.013797 | 0.232 | 0.271 |  |  |  | <i>BEST4</i>    | Body    |

|            |    |             |          |       |       |  |  |     |                 |         |
|------------|----|-------------|----------|-------|-------|--|--|-----|-----------------|---------|
| cg07846737 | 19 | 5,068,701   | 1.94E-38 | 0.232 | 0.217 |  |  |     | <i>KDM4B</i>    | Body    |
| cg24796272 | 8  | 99,954,679  | 1.33E-07 | 0.232 | 0.220 |  |  |     |                 |         |
| cg04334011 | 14 | 21,561,590  | 7.57E-09 | 0.232 | 0.222 |  |  |     | <i>ZNF219</i>   | Body    |
| cg04674956 | 8  | 65,499,048  | 0.000769 | 0.232 | 0.233 |  |  |     |                 |         |
| cg09658497 | 7  | 2,847,517   | 0.001389 | 0.232 | 0.144 |  |  |     | <i>GNA12</i>    | Body    |
| cg15607664 | 12 | 57,630,422  | 2.67E-13 | 0.232 | 0.219 |  |  |     | <i>NDUFA4L2</i> | Body    |
| cg23201938 | 5  | 134,451,535 | 1.21E-23 | 0.232 | 0.233 |  |  |     |                 |         |
| cg04322202 | 4  | 66,533,472  | 0.036427 | 0.232 | 0.247 |  |  |     | <i>EPHA5</i>    | Body    |
| cg04371726 | 2  | 63,285,645  | 0.001773 | 0.232 | 0.232 |  |  |     |                 |         |
| cg02750065 | 12 | 117,155,382 | 1.66E-12 | 0.232 | 0.220 |  |  |     | <i>C12orf49</i> | 3'UTR   |
| cg22218806 | 1  | 203,434,261 | 1.95E-17 | 0.232 | 0.228 |  |  |     |                 |         |
| cg08318587 | 2  | 216,484,453 | 0.023839 | 0.232 | 0.157 |  |  | Yes |                 |         |
| cg26924480 | 1  | 22,463,884  | 1.3E-07  | 0.232 | 0.168 |  |  |     | <i>WNT4</i>     | Body    |
| cg04337653 | 6  | 100,905,587 | 0.01186  | 0.232 | 0.284 |  |  |     | <i>SIM1</i>     | Body    |
| cg20460541 | X  | 129,253,297 | 0.00296  | 0.232 | 0.180 |  |  |     |                 |         |
| cg26809635 | 12 | 54,355,087  | 0.014817 | 0.232 | 0.270 |  |  |     |                 |         |
| cg05762671 | 16 | 67,345,737  | 4.88E-06 | 0.232 | 0.207 |  |  |     | <i>KCTD19</i>   | Body    |
| cg15416329 | 14 | 74,706,016  | 2.2E-08  | 0.232 | 0.219 |  |  |     | <i>VSX2</i>     | TSS200  |
| cg17540545 | 19 | 35,630,355  | 1.98E-08 | 0.232 | 0.252 |  |  |     | <i>FXVD1</i>    | 5'UTR   |
| cg24979288 | 7  | 27,242,424  | 0.04127  | 0.232 | 0.312 |  |  |     |                 |         |
| cg14567085 | 9  | 133,411,807 | 3.81E-05 | 0.232 | 0.172 |  |  |     |                 |         |
| cg14906976 | 21 | 45,177,538  | 2.75E-10 | 0.232 | 0.239 |  |  |     | <i>PDXK</i>     | 3'UTR   |
| cg16552271 | 1  | 15,392,907  | 1.17E-08 | 0.232 | 0.212 |  |  |     | <i>KIAA1026</i> | Body    |
| cg20782117 | 7  | 95,865,631  | 3.05E-08 | 0.232 | 0.221 |  |  |     | <i>SLC25A13</i> | Body    |
| cg13333954 | 12 | 1,098,663   | 3.14E-07 | 0.232 | 0.249 |  |  |     |                 |         |
| cg05656486 | 1  | 161,171,383 | 3.08E-05 | 0.232 | 0.236 |  |  |     | <i>NDUFS2</i>   | 5'UTR   |
| cg20209499 | 2  | 26,929,892  | 1.07E-45 | 0.232 | 0.233 |  |  |     | <i>KCNK3</i>    | Body    |
| cg09285683 | 2  | 216,691,985 | 3.13E-05 | 0.232 | 0.202 |  |  |     |                 |         |
| cg10879867 | 11 | 68,622,263  | 4.2E-06  | 0.232 | 0.205 |  |  |     |                 |         |
| cg01896424 | 11 | 20,010,227  | 0.015775 | 0.232 | 0.169 |  |  |     | <i>NAV2</i>     | Body    |
| cg16705245 | 2  | 180,725,637 | 1.14E-06 | 0.232 | 0.170 |  |  |     | <i>ZNF385B</i>  | 5'UTR   |
| cg25074023 | 2  | 179,316,491 | 0.004456 | 0.232 | 0.242 |  |  |     | <i>PRKRA</i>    | TSS1500 |
| cg07730848 | 5  | 6,379,108   | 1.97E-05 | 0.232 | 0.197 |  |  |     | <i>MED10</i>    | TSS1500 |
| cg00370047 | 11 | 1,481,436   | 1.38E-13 | 0.232 | 0.233 |  |  |     | <i>BRSK2</i>    | Body    |

|            |    |             |          |       |       |            |       |  |                 |         |
|------------|----|-------------|----------|-------|-------|------------|-------|--|-----------------|---------|
| cg19107291 | 15 | 100,537,865 | 2.11E-12 | 0.232 | 0.211 |            |       |  | <i>ADAMTS17</i> | Body    |
| cg27112146 | 2  | 148,641,953 | 5.95E-08 | 0.232 | 0.240 |            |       |  | <i>ACVR2A</i>   | Body    |
| cg21244177 | 1  | 63,795,848  | 1.14E-07 | 0.232 | 0.228 |            |       |  |                 |         |
| cg22855968 | 6  | 134,673,162 | 3.22E-06 | 0.232 | 0.227 |            |       |  |                 |         |
| cg05223396 | 5  | 171,830,155 | 6.83E-23 | 0.232 | 0.217 |            |       |  | <i>SH3PXD2B</i> | Body    |
| cg25930591 | 7  | 96,627,602  | 0.000553 | 0.232 | 0.279 |            |       |  | <i>DLX6AS</i>   | Body    |
| cg20627916 | 6  | 152,128,328 | 0.002697 | 0.232 | 0.204 | 0.03716632 | 0.059 |  | <i>ESR1</i>     | TSS1500 |
| cg18326021 | 10 | 106,401,479 | 0.0347   | 0.232 | 0.218 |            |       |  | <i>SORCS3</i>   | 1stExon |
| cg11412703 | 6  | 44,629,403  | 0.00022  | 0.232 | 0.278 |            |       |  |                 |         |
| cg15990972 | 2  | 177,012,372 | 1.87E-08 | 0.232 | 0.176 |            |       |  |                 |         |
| cg22294740 | 19 | 2,294,961   | 0.000571 | 0.232 | 0.295 |            |       |  | <i>LINGO3</i>   | 5'UTR   |
| cg20596162 | 15 | 45,408,861  | 7.01E-11 | 0.232 | 0.228 |            |       |  | <i>DUOXA2</i>   | Body    |
| cg06403156 | 10 | 1,651,293   | 0.002344 | 0.232 | 0.220 |            |       |  | <i>ADARB2</i>   | Body    |
| cg10949007 | 5  | 95,159,614  | 0.000706 | 0.232 | 0.194 |            |       |  | <i>GLRX</i>     | TSS1500 |
| cg16207110 | 17 | 37,024,401  | 2.12E-05 | 0.232 | 0.252 |            |       |  |                 |         |
| cg16354117 | 17 | 73,829,262  | 0.000184 | 0.232 | 0.242 |            |       |  | <i>UNC13D</i>   | Body    |
| cg19897071 | 5  | 35,991,382  | 0.000195 | 0.232 | 0.230 |            |       |  | <i>UGT3A1</i>   | 5'UTR   |
| cg05774801 | 4  | 154,709,756 | 0.003193 | 0.232 | 0.220 | 2.63E-15   | 0.149 |  | <i>SFRP2</i>    | 1stExon |
| cg06055229 | 5  | 124,077,966 | 0.000466 | 0.232 | 0.208 |            |       |  | <i>ZNF608</i>   | Body    |
| cg11612266 | 2  | 947,167     | 6.14E-07 | 0.232 | 0.215 |            |       |  | <i>SNTG2</i>    | Body    |
| cg15895339 | 10 | 20,210,338  | 3.9E-21  | 0.232 | 0.231 |            |       |  | <i>PLXDC2</i>   | Body    |
| cg22723675 | 13 | 95,358,092  | 0.021804 | 0.232 | 0.208 |            |       |  |                 |         |
| cg03882585 | 6  | 152,957,910 | 0.017706 | 0.232 | 0.189 |            |       |  | <i>SYNE1</i>    | 5'UTR   |
| cg08244262 | 21 | 42,797,939  | 0.003976 | 0.232 | 0.143 |            |       |  | <i>MX1</i>      | TSS200  |
| cg00333483 | 17 | 79,504,180  | 0.033671 | 0.232 | 0.329 |            |       |  |                 |         |
| cg06365303 | 20 | 2,801,844   | 0.016789 | 0.232 | 0.288 |            |       |  |                 |         |
| cg01476003 | 16 | 71,460,486  | 0.001482 | 0.232 | 0.244 |            |       |  |                 |         |
| cg04846781 | 6  | 32,077,084  | 5.83E-05 | 0.232 | 0.219 |            |       |  | <i>TNXB</i>     | 5'UTR   |
| cg09048500 | 20 | 21,085,073  | 1.89E-05 | 0.232 | 0.262 |            |       |  |                 |         |
| cg11647108 | 10 | 81,967,516  | 3.34E-06 | 0.232 | 0.208 |            |       |  |                 |         |
| cg00010445 | 19 | 14,089,630  | 4.72E-07 | 0.232 | 0.171 |            |       |  | <i>RFX1</i>     | Body    |
| cg25353142 | 20 | 43,729,869  | 1.89E-07 | 0.232 | 0.222 |            |       |  | <i>KCNS1</i>    | TSS200  |
| cg26517663 | 15 | 60,295,294  | 0.028597 | 0.232 | 0.290 |            |       |  | <i>FOXB1</i>    | TSS1500 |
| cg00092518 | 13 | 50,070,550  | 0.000282 | 0.232 | 0.206 |            |       |  | <i>PHF11</i>    | Body    |

|            |    |             |          |       |       |          |       |  |                |         |
|------------|----|-------------|----------|-------|-------|----------|-------|--|----------------|---------|
| cg21895319 | 3  | 150,874,026 | 1.03E-20 | 0.232 | 0.221 |          |       |  | <i>MED12L</i>  | Body    |
| cg25631352 | 2  | 70,995,527  | 0.018566 | 0.232 | 0.107 |          |       |  | <i>ADD2</i>    | TSS200  |
| cg05965863 | 3  | 137,480,182 | 0.001293 | 0.232 | 0.185 |          |       |  |                |         |
| cg10169241 | 19 | 1,467,032   | 0.001143 | 0.232 | 0.249 |          |       |  | <i>APC2</i>    | Body    |
| cg13531886 | 10 | 3,281,434   | 3.7E-15  | 0.232 | 0.221 |          |       |  |                |         |
| cg13833437 | 2  | 27,531,236  | 2.94E-09 | 0.232 | 0.237 |          |       |  | <i>UCN</i>     | TSS200  |
| cg13935577 | 12 | 107,974,897 | 3.82E-18 | 0.232 | 0.229 |          |       |  | <i>BTBD11</i>  | Body    |
| cg16072192 | 5  | 2,741,047   | 0.000897 | 0.232 | 0.223 |          |       |  |                |         |
| cg04205616 | 16 | 79,692,516  | 1.41E-11 | 0.232 | 0.217 |          |       |  |                |         |
| cg05209330 | 5  | 131,550,942 | 6.71E-09 | 0.232 | 0.242 |          |       |  | <i>P4HA2</i>   | Body    |
| cg09744051 | 22 | 43,115,937  | 0.000283 | 0.232 | 0.233 | 6.01E-08 | 0.099 |  | <i>A4GALT</i>  | 5'UTR   |
| cg09329936 | 10 | 80,523,167  | 9.51E-07 | 0.232 | 0.220 |          |       |  |                |         |
| cg11029634 | 6  | 130,088,757 | 0.007799 | 0.232 | 0.123 |          |       |  |                |         |
| cg13748267 | X  | 47,483,418  | 0.042153 | 0.232 | 0.033 |          |       |  |                |         |
| cg19429599 | 5  | 50,266,099  | 0.000682 | 0.232 | 0.263 |          |       |  |                |         |
| cg16524960 | 16 | 69,141,345  | 0.031627 | 0.232 | 0.227 |          |       |  | <i>HAS3</i>    | 5'UTR   |
| cg20843277 | 11 | 70,672,365  | 4.65E-21 | 0.232 | 0.193 |          |       |  | <i>SHANK2</i>  | Body    |
| cg14754787 | 17 | 35,299,600  | 4.48E-07 | 0.232 | 0.213 |          |       |  | <i>LHX1</i>    | Body    |
| cg23487201 | 20 | 57,090,122  | 2.52E-07 | 0.232 | 0.257 |          |       |  | <i>APCDD1L</i> | TSS200  |
| cg11691189 | 2  | 47,743,741  | 3.16E-09 | 0.232 | 0.234 |          |       |  |                |         |
| cg15621656 | 5  | 118,609,258 | 4.01E-05 | 0.232 | 0.234 |          |       |  | <i>TNFAIP8</i> | Body    |
| cg12951488 | 11 | 115,516,632 | 1.86E-08 | 0.232 | 0.209 |          |       |  |                |         |
| cg11806178 | 20 | 39,319,929  | 2.1E-08  | 0.232 | 0.217 |          |       |  |                |         |
| cg04691277 | 1  | 6,479,352   | 0.000489 | 0.232 | 0.158 |          |       |  | <i>HES2</i>    | Body    |
| cg05131623 | 3  | 179,755,285 | 0.03646  | 0.232 | 0.328 |          |       |  | <i>PEX5L</i>   | TSS1500 |
| cg09221867 | 4  | 134,071,663 | 0.008473 | 0.232 | 0.160 |          |       |  | <i>PCDH10</i>  | 1stExon |
| cg13292202 | 5  | 112,771,367 | 0.0002   | 0.232 | 0.236 |          |       |  | <i>TSSK1B</i>  | TSS1500 |
| cg03994820 | 3  | 350,682     | 0.005141 | 0.232 | 0.198 |          |       |  | <i>CHL1</i>    | 5'UTR   |
| cg04624228 | 8  | 38,411,598  | 0.033762 | 0.232 | 0.184 |          |       |  |                |         |
| cg11179759 | 15 | 89,947,346  | 0.014612 | 0.232 | 0.222 |          |       |  |                |         |
| cg21226965 | 6  | 169,852,806 | 0.000105 | 0.232 | 0.254 |          |       |  |                |         |
| cg27170985 | 14 | 37,124,063  | 4.02E-06 | 0.232 | 0.236 |          |       |  |                |         |
| cg16077055 | 2  | 106,428,750 | 1.67E-09 | 0.232 | 0.210 |          |       |  | <i>NCK2</i>    | 5'UTR   |
| cg17320707 | 10 | 119,307,931 | 0.016713 | 0.232 | 0.293 |          |       |  | <i>EMX2</i>    | 3'UTR   |

|            |    |             |          |       |       |          |       |  |                  |         |
|------------|----|-------------|----------|-------|-------|----------|-------|--|------------------|---------|
| cg24765394 | 9  | 129,088,647 | 7.87E-07 | 0.232 | 0.212 |          |       |  | <i>FAM125B</i>   | TSS1500 |
| cg17683593 | 11 | 61,283,872  | 0.001285 | 0.232 | 0.258 |          |       |  | <i>SYT7</i>      | 3'UTR   |
| cg23914842 | 1  | 9,327,170   | 0.033943 | 0.232 | 0.252 |          |       |  | <i>H6PD</i>      | 3'UTR   |
| cg04307594 | 1  | 205,525,860 | 1.47E-11 | 0.232 | 0.231 |          |       |  | <i>LOC284578</i> | TSS200  |
| cg04319276 | 19 | 42,445,244  | 0.000475 | 0.232 | 0.255 |          |       |  |                  |         |
| cg22948288 | 17 | 41,739,246  | 6.79E-08 | 0.232 | 0.211 |          |       |  | <i>MEOX1</i>     | TSS1500 |
| cg17599241 | 5  | 82,858,676  | 1.09E-05 | 0.232 | 0.202 |          |       |  | <i>VCAN</i>      | Body    |
| cg19265103 | 12 | 51,784,644  | 1.01E-15 | 0.232 | 0.204 |          |       |  | <i>GALNT6</i>    | 5'UTR   |
| cg19548652 | 14 | 34,419,316  | 0.000136 | 0.232 | 0.254 |          |       |  | <i>EGLN3</i>     | Body    |
| cg22681784 | 4  | 57,687,546  | 5.96E-08 | 0.232 | 0.200 | 2.24E-13 | 0.123 |  | <i>SPINK2</i>    | Body    |
| cg24929538 | 3  | 73,164,119  | 1.69E-09 | 0.232 | 0.249 |          |       |  |                  |         |
| cg07167946 | 5  | 1,878,205   | 1.02E-10 | 0.232 | 0.213 |          |       |  | <i>IRX4</i>      | Body    |
| cg15152362 | 20 | 31,173,500  | 0.003343 | 0.232 | 0.219 |          |       |  |                  |         |
| cg18780257 | 3  | 192,126,023 | 0.015607 | 0.232 | 0.238 |          |       |  | <i>FGF12</i>     | 5'UTR   |
| cg16620390 | 12 | 125,670,262 | 2.19E-05 | 0.232 | 0.187 |          |       |  |                  |         |
| cg00321007 | 17 | 15,340,112  | 4.59E-19 | 0.232 | 0.229 |          |       |  | <i>CDRT4</i>     | 3'UTR   |
| cg09771468 | 9  | 135,462,169 | 0.000229 | 0.232 | 0.232 |          |       |  | <i>BARHL1</i>    | Body    |
| cg18006379 | 10 | 132,907,652 | 1.84E-09 | 0.232 | 0.220 |          |       |  | <i>TCERG1L</i>   | Body    |
| cg18231025 | 1  | 59,573,471  | 3.65E-15 | 0.232 | 0.215 |          |       |  |                  |         |
| cg21484547 | 13 | 28,319,144  | 5.43E-06 | 0.232 | 0.215 |          |       |  |                  |         |
| cg25467634 | 10 | 49,684,658  | 3.34E-09 | 0.232 | 0.178 |          |       |  | <i>ARHGAP22</i>  | Body    |
| cg05455409 | 2  | 202,897,006 | 0.005819 | 0.232 | 0.192 |          |       |  |                  |         |
| cg09819083 | 1  | 110,673,179 | 0.001153 | 0.232 | 0.244 |          |       |  |                  |         |
| cg17444738 | 4  | 85,417,969  | 7.81E-08 | 0.232 | 0.271 |          |       |  | <i>NKX6-1</i>    | Body    |
| cg17838427 | 1  | 204,653,956 | 0.034195 | 0.232 | 0.067 |          |       |  | <i>LRRN2</i>     | 5'UTR   |
| cg14565725 | 1  | 119,532,044 | 2.13E-05 | 0.232 | 0.225 |          |       |  | <i>TBX15</i>     | 1stExon |
| cg20119487 | 11 | 61,723,124  | 5.55E-05 | 0.232 | 0.184 |          |       |  | <i>BEST1</i>     | Body    |
| cg24417499 | 1  | 33,351,653  | 0.00044  | 0.232 | 0.181 | 2.08E-11 | 0.133 |  | <i>HPCA</i>      | TSS1500 |
| cg25162948 | 13 | 50,070,718  | 0.000108 | 0.232 | 0.198 |          |       |  | <i>PHF11</i>     | Body    |
| cg26821745 | 2  | 177,023,183 | 0.002906 | 0.232 | 0.282 |          |       |  |                  |         |
| cg07425204 | 17 | 66,511,183  | 8.97E-10 | 0.232 | 0.191 |          |       |  | <i>PRKAR1A</i>   | 5'UTR   |
| cg20813965 | 4  | 57,976,944  | 0.007261 | 0.232 | 0.248 |          |       |  | <i>IGFBP7</i>    | TSS1500 |
| cg04110224 | 11 | 70,508,463  | 1.37E-05 | 0.232 | 0.231 |          |       |  | <i>SHANK2</i>    | Body    |
| cg27518976 | 1  | 23,886,730  | 4.43E-07 | 0.232 | 0.260 |          |       |  | <i>ID3</i>       | TSS1500 |

|            |    |             |          |       |       |  |  |  |                 |         |
|------------|----|-------------|----------|-------|-------|--|--|--|-----------------|---------|
| cg01089249 | 2  | 171,676,553 | 0.000001 | 0.232 | 0.206 |  |  |  | <i>GAD1</i>     | Body    |
| cg02614024 | 15 | 93,652,766  | 4.88E-07 | 0.232 | 0.223 |  |  |  |                 |         |
| cg11803251 | 4  | 41,659,108  | 0.000752 | 0.232 | 0.199 |  |  |  | <i>LIMCH1</i>   | Body    |
| cg12756396 | 1  | 50,886,969  | 2.83E-07 | 0.232 | 0.226 |  |  |  | <i>DMRTA2</i>   | Body    |
| cg22256631 | 3  | 181,443,971 | 0.000283 | 0.232 | 0.212 |  |  |  | <i>SOX2OT</i>   | Body    |
| cg00290892 | 3  | 87,842,398  | 0.032395 | 0.232 | 0.324 |  |  |  |                 |         |
| cg04768501 | 3  | 9,956,823   | 0.035914 | 0.232 | 0.223 |  |  |  | <i>IL17RE</i>   | Body    |
| cg14579864 | 9  | 79,632,225  | 0.027897 | 0.232 | 0.192 |  |  |  |                 |         |
| cg16294013 | 1  | 66,258,022  | 0.004846 | 0.232 | 0.219 |  |  |  | <i>PDE4B</i>    | TSS200  |
| cg22817352 | 1  | 204,653,629 | 0.001221 | 0.232 | 0.158 |  |  |  | <i>LRRN2</i>    | 5'UTR   |
| cg06467040 | 5  | 34,670,172  | 8.88E-12 | 0.232 | 0.227 |  |  |  | <i>RAI14</i>    | 5'UTR   |
| cg10238080 | 12 | 50,445,058  | 1.65E-06 | 0.232 | 0.259 |  |  |  |                 |         |
| cg15172785 | 11 | 103,105,918 | 2.33E-13 | 0.232 | 0.255 |  |  |  | <i>DYNC2H1</i>  | Body    |
| cg22484737 | 7  | 115,117,568 | 6.66E-06 | 0.232 | 0.235 |  |  |  |                 |         |
| cg23847712 | 4  | 9,783,196   | 0.004885 | 0.232 | 0.311 |  |  |  | <i>DRD5</i>     | TSS200  |
| cg00639615 | 15 | 89,786,496  | 0.002264 | 0.232 | 0.310 |  |  |  | <i>FANCI</i>    | TSS1500 |
| cg10148473 | 12 | 75,601,824  | 0.010399 | 0.232 | 0.162 |  |  |  | <i>KCNC2</i>    | 5'UTR   |
| cg16764778 | 15 | 41,061,410  | 6.53E-06 | 0.232 | 0.218 |  |  |  | <i>DNAJC17</i>  | Body    |
| cg05004665 | 1  | 20,800,052  | 1.53E-07 | 0.232 | 0.244 |  |  |  |                 |         |
| cg18209323 | 7  | 92,672,878  | 3.38E-12 | 0.232 | 0.224 |  |  |  |                 |         |
| cg18220920 | 12 | 115,126,061 | 0.006123 | 0.232 | 0.252 |  |  |  |                 |         |
| cg19061690 | 17 | 46,080,304  | 1.36E-06 | 0.232 | 0.235 |  |  |  |                 |         |
| cg21340621 | 12 | 122,020,166 | 0.008505 | 0.232 | 0.250 |  |  |  | <i>KDM2B</i>    | TSS1500 |
| cg22400703 | 2  | 68,545,995  | 9.51E-09 | 0.232 | 0.244 |  |  |  | <i>CNRIP1</i>   | Body    |
| cg26493188 | 16 | 2,975,209   | 1.39E-08 | 0.232 | 0.226 |  |  |  | <i>FLYWCH1</i>  | 5'UTR   |
| cg15770575 | 22 | 42,760,647  | 4.76E-10 | 0.232 | 0.228 |  |  |  |                 |         |
| cg08302913 | 2  | 182,548,786 | 0.012813 | 0.232 | 0.206 |  |  |  |                 |         |
| cg27161197 | 12 | 47,224,649  | 1.29E-07 | 0.232 | 0.200 |  |  |  |                 |         |
| cg26673012 | 7  | 35,293,753  | 0.046137 | 0.232 | 0.262 |  |  |  | <i>TBX20</i>    | TSS200  |
| cg14471364 | 2  | 157,177,936 | 0.009389 | 0.232 | 0.212 |  |  |  |                 |         |
| cg04854328 | 5  | 92,914,828  | 6.15E-06 | 0.232 | 0.209 |  |  |  | <i>FLJ42709</i> | Body    |
| cg16404157 | 14 | 38,724,648  | 3.84E-05 | 0.232 | 0.241 |  |  |  | <i>CLEC14A</i>  | 1stExon |
| cg19062108 | 12 | 57,630,834  | 5.54E-06 | 0.232 | 0.205 |  |  |  | <i>NDUFA4L2</i> | Body    |
| cg15115171 | 10 | 17,604,829  | 5.65E-06 | 0.232 | 0.196 |  |  |  |                 |         |



|            |    |             |          |       |       |          |       |  |                |         |
|------------|----|-------------|----------|-------|-------|----------|-------|--|----------------|---------|
| cg19071452 | 2  | 152,146,944 | 5.51E-08 | 0.232 | 0.199 |          |       |  | <i>NMI</i>     | TSS1500 |
| cg22295864 | 11 | 74,233,472  | 4.29E-10 | 0.232 | 0.198 |          |       |  |                |         |
| cg19494811 | 6  | 34,356,253  | 6.72E-12 | 0.232 | 0.233 |          |       |  | <i>NUDT3</i>   | Body    |
| cg08126875 | 6  | 125,743,207 | 8.37E-05 | 0.231 | 0.209 |          |       |  |                |         |
| cg20018782 | 14 | 23,317,496  | 1.69E-08 | 0.231 | 0.242 |          |       |  |                |         |
| cg20045394 | 17 | 36,184,576  | 1.49E-06 | 0.231 | 0.224 |          |       |  |                |         |
| cg20972453 | 13 | 20,805,460  | 5.58E-09 | 0.231 | 0.200 |          |       |  | <i>GJB6</i>    | 5'UTR   |
| cg23838005 | 17 | 74,868,604  | 7.69E-15 | 0.231 | 0.226 |          |       |  | <i>MGAT5B</i>  | Body    |
| cg01154445 | 2  | 206,548,171 | 0.000989 | 0.231 | 0.225 |          |       |  | <i>NRP2</i>    | Body    |
| cg01389386 | 16 | 70,471,055  | 1.51E-14 | 0.231 | 0.208 |          |       |  | <i>ST3GAL2</i> | 5'UTR   |
| cg14394550 | 8  | 22,548,400  | 0.000305 | 0.231 | 0.184 |          |       |  | <i>EGR3</i>    | Body    |
| cg15607672 | 14 | 57,277,227  | 1.23E-05 | 0.231 | 0.291 | 2.36E-17 | 0.172 |  | <i>OTX2</i>    | TSS200  |
| cg15934958 | 3  | 37,212,084  | 2.65E-07 | 0.231 | 0.203 |          |       |  | <i>LRRFIP2</i> | 5'UTR   |
| cg00651020 | 2  | 180,726,576 | 0.004383 | 0.231 | 0.099 |          |       |  | <i>MIR1258</i> | TSS1500 |
| cg13522075 | 9  | 99,481,726  | 3.61E-06 | 0.231 | 0.237 |          |       |  |                |         |
| cg13907146 | 3  | 50,243,565  | 6.5E-13  | 0.231 | 0.196 |          |       |  | <i>SLC38A3</i> | 5'UTR   |
| cg07420274 | 2  | 171,676,306 | 2.02E-07 | 0.231 | 0.206 |          |       |  | <i>GAD1</i>    | Body    |
| cg21900073 | 4  | 82,005,992  | 3.34E-07 | 0.231 | 0.221 |          |       |  |                |         |
| cg22844669 | X  | 136,510,760 | 0.022336 | 0.231 | 0.249 |          |       |  |                |         |
| cg26427498 | 7  | 105,987,258 | 3.35E-07 | 0.231 | 0.238 |          |       |  |                |         |
| cg27577928 | 4  | 54,975,388  | 1.28E-08 | 0.231 | 0.190 |          |       |  |                |         |
| cg17557766 | 6  | 10,420,696  | 8.57E-08 | 0.231 | 0.237 |          |       |  | <i>TFAP2A</i>  | TSS1500 |
| cg15092343 | 4  | 4,860,061   | 0.002137 | 0.231 | 0.258 |          |       |  | <i>MSX1</i>    | TSS1500 |
| cg02806733 | 2  | 231,731,972 | 3.55E-06 | 0.231 | 0.267 |          |       |  | <i>ITM2C</i>   | Body    |
| cg06049774 | 10 | 81,892,109  | 0.005551 | 0.231 | 0.217 |          |       |  | <i>PLAC9</i>   | TSS200  |
| cg06012872 | 10 | 45,374,841  | 0.011722 | 0.231 | 0.147 |          |       |  |                |         |
| cg10567964 | 1  | 205,312,695 | 1.72E-05 | 0.231 | 0.194 |          |       |  | <i>KLHDC8A</i> | Body    |
| cg18020955 | 1  | 147,790,806 | 0.000246 | 0.231 | 0.255 |          |       |  |                |         |
| cg20904489 | 6  | 6,002,032   | 5.7E-05  | 0.231 | 0.189 |          |       |  | <i>NRN1</i>    | Body    |
| cg26143719 | 22 | 37,584,227  | 3.63E-09 | 0.231 | 0.220 | 3.73E-19 | 0.154 |  | <i>C1QTNF6</i> | 1stExon |
| cg04864327 | 7  | 111,396,894 | 8.95E-09 | 0.231 | 0.241 |          |       |  | <i>DOCK4</i>   | Body    |
| cg10473369 | 17 | 7,492,352   | 1.48E-24 | 0.231 | 0.224 |          |       |  | <i>SOX15</i>   | Body    |
| cg12642289 | 11 | 78,948,859  | 8.06E-08 | 0.231 | 0.200 |          |       |  | <i>ODZ4</i>    | 5'UTR   |
| cg07281879 | 11 | 32,459,626  | 0.003806 | 0.231 | 0.295 |          |       |  | <i>WIT1</i>    | Body    |

|            |    |             |          |       |       |          |       |  |                  |         |
|------------|----|-------------|----------|-------|-------|----------|-------|--|------------------|---------|
| cg07536847 | 1  | 18,957,232  | 0.003405 | 0.231 | 0.216 | 5.25E-13 | 0.174 |  | <i>PAX7</i>      | TSS1500 |
| cg23316060 | 19 | 33,761,225  | 2.95E-07 | 0.231 | 0.214 |          |       |  |                  |         |
| cg01775265 | 20 | 31,780,882  | 4.13E-23 | 0.231 | 0.212 |          |       |  | <i>BASE</i>      | TSS1500 |
| cg24370475 | 11 | 69,518,003  | 0.000002 | 0.231 | 0.275 |          |       |  | <i>FGF19</i>     | Body    |
| cg08144172 | 1  | 41,849,203  | 3.8E-05  | 0.231 | 0.157 |          |       |  |                  |         |
| cg10859192 | 12 | 54,071,672  | 2.95E-06 | 0.231 | 0.230 |          |       |  | <i>ATP5G2</i>    | TSS1500 |
| cg10934129 | 5  | 172,655,841 | 6.33E-06 | 0.231 | 0.192 |          |       |  |                  |         |
| cg15084543 | 1  | 79,472,408  | 9.1E-09  | 0.231 | 0.237 |          |       |  | <i>ELTD1</i>     | 5'UTR   |
| cg16859420 | 8  | 41,219,116  | 0.003212 | 0.231 | 0.123 |          |       |  |                  |         |
| cg03854796 | 11 | 31,819,162  | 0.00671  | 0.231 | 0.195 |          |       |  | <i>PAX6</i>      | Body    |
| cg05967403 | 13 | 28,367,245  | 0.000214 | 0.231 | 0.230 |          |       |  | <i>GSX1</i>      | Body    |
| cg06755992 | 3  | 123,753,198 | 0.003832 | 0.231 | 0.141 |          |       |  |                  |         |
| cg07188896 | 10 | 59,546,843  | 7.61E-05 | 0.231 | 0.129 |          |       |  |                  |         |
| cg16130857 | 10 | 102,900,262 | 1.67E-05 | 0.231 | 0.208 |          |       |  |                  |         |
| cg12615235 | 16 | 1,969,016   | 1.29E-05 | 0.231 | 0.195 |          |       |  | <i>HS3ST6</i>    | TSS1500 |
| cg20798740 | 8  | 37,560,840  | 0.000102 | 0.231 | 0.207 |          |       |  |                  |         |
| cg14064694 | 6  | 26,273,556  | 0.038523 | 0.231 | 0.145 |          |       |  | <i>HIST1H2BI</i> | 1stExon |
| cg07286123 | 20 | 23,067,126  | 0.007735 | 0.231 | 0.182 |          |       |  | <i>CD93</i>      | TSS200  |
| cg03729251 | 4  | 151,501,035 | 1.37E-11 | 0.231 | 0.233 |          |       |  | <i>LRBA</i>      | Body    |
| cg18128969 | 21 | 22,369,908  | 1.3E-05  | 0.231 | 0.204 |          |       |  | <i>NCAM2</i>     | TSS1500 |
| cg04861904 | 1  | 147,737,182 | 4.55E-05 | 0.231 | 0.221 |          |       |  |                  |         |
| cg05506446 | 11 | 46,409,501  | 2.32E-08 | 0.231 | 0.240 |          |       |  | <i>CHRM4</i>     | TSS1500 |
| cg26118435 | 2  | 161,350,826 | 0.00116  | 0.231 | 0.107 |          |       |  | <i>RBMS1</i>     | TSS1500 |
| cg12595281 | 15 | 93,633,172  | 0.000972 | 0.231 | 0.218 |          |       |  | <i>RGMA</i>      | TSS1500 |
| cg25595442 | 1  | 39,981,352  | 0.001422 | 0.231 | 0.264 |          |       |  | <i>BMP8A</i>     | Body    |
| cg26777456 | 12 | 54,454,250  | 0.001747 | 0.231 | 0.167 |          |       |  | <i>FLJ12825</i>  | Body    |
| cg05621843 | 9  | 97,806,397  | 1E-12    | 0.231 | 0.217 |          |       |  | <i>C9orf3</i>    | Body    |
| cg07611887 | 16 | 21,831,372  | 8.32E-10 | 0.231 | 0.195 |          |       |  | <i>RRN3P1</i>    | TSS1500 |
| cg21170796 | 1  | 119,528,164 | 0.004582 | 0.231 | 0.269 |          |       |  | <i>TBX15</i>     | 5'UTR   |
| cg23880533 | 12 | 124,896,079 | 0.000153 | 0.231 | 0.196 |          |       |  | <i>NCOR2</i>     | Body    |
| cg03715305 | 19 | 5,894,715   | 2.72E-14 | 0.231 | 0.202 |          |       |  | <i>NDUFA11</i>   | 3'UTR   |
| cg05137975 | 6  | 99,786,314  | 2.98E-11 | 0.231 | 0.227 |          |       |  | <i>C6orf168</i>  | Body    |
| cg15726807 | 19 | 41,857,198  | 0.000342 | 0.231 | 0.216 |          |       |  | <i>TGFB1</i>     | Body    |
| cg16101346 | 1  | 186,650,479 | 8.68E-06 | 0.231 | 0.237 |          |       |  | <i>PTGS2</i>     | TSS1500 |

|            |    |             |          |       |       |          |       |  |                 |         |
|------------|----|-------------|----------|-------|-------|----------|-------|--|-----------------|---------|
| cg18533201 | 8  | 97,157,453  | 0.000518 | 0.231 | 0.316 |          |       |  | <i>GDF6</i>     | Body    |
| cg16238815 | 14 | 36,741,794  | 0.010997 | 0.231 | 0.287 |          |       |  |                 |         |
| cg03942871 | 7  | 102,574,105 | 4.75E-12 | 0.231 | 0.226 |          |       |  | <i>LRRC17</i>   | 5'UTR   |
| cg07817686 | 4  | 16,085,401  | 0.000872 | 0.231 | 0.272 |          |       |  | <i>PROM1</i>    | 5'UTR   |
| cg16479539 | 12 | 54,345,212  | 0.00523  | 0.231 | 0.246 |          |       |  |                 |         |
| cg23371746 | 1  | 119,532,925 | 7.25E-06 | 0.231 | 0.222 |          |       |  | <i>TBX15</i>    | TSS1500 |
| cg13358636 | 2  | 124,782,263 | 0.048064 | 0.231 | 0.141 |          |       |  | <i>CNTNAP5</i>  | TSS1500 |
| cg09184832 | 6  | 79,620,586  | 2.9E-10  | 0.231 | 0.237 |          |       |  |                 |         |
| cg12171761 | 8  | 61,910,949  | 2.68E-18 | 0.231 | 0.228 |          |       |  |                 |         |
| cg11795276 | 12 | 54,454,252  | 0.000149 | 0.231 | 0.155 |          |       |  | <i>FLJ12825</i> | Body    |
| cg27138293 | 17 | 79,503,701  | 1.34E-12 | 0.231 | 0.210 |          |       |  | <i>FSCN2</i>    | Body    |
| cg03356689 | 11 | 128,586,365 | 0.049483 | 0.231 | 0.258 |          |       |  | <i>FLI1</i>     | Body    |
| cg24251035 | 7  | 138,721,065 | 0.005493 | 0.231 | 0.129 | 4.3E-23  | 0.171 |  | <i>ZC3HAV1L</i> | TSS1500 |
| cg05197667 | 12 | 64,383,297  | 0.000805 | 0.231 | 0.275 |          |       |  | <i>SRGAP1</i>   | Body    |
| cg06827038 | 17 | 48,912,952  | 1.47E-13 | 0.231 | 0.216 | 2.49E-23 | 0.159 |  | <i>WFIKKN2</i>  | 1stExon |
| cg10641258 | 21 | 43,484,279  | 5.7E-14  | 0.231 | 0.200 |          |       |  |                 |         |
| cg18166150 | 10 | 3,169,037   | 0.000503 | 0.231 | 0.129 |          |       |  | <i>PFKP</i>     | Body    |
| cg09579310 | 6  | 10,395,947  | 9.56E-05 | 0.231 | 0.240 |          |       |  |                 |         |
| cg09990194 | 14 | 76,289,228  | 2.38E-07 | 0.231 | 0.235 |          |       |  | <i>TTL5</i>     | Body    |
| cg10632969 | 11 | 134,023,334 | 1.06E-09 | 0.231 | 0.237 |          |       |  | <i>NCAPD3</i>   | Body    |
| cg14886850 | 14 | 75,122,289  | 4.06E-13 | 0.231 | 0.227 |          |       |  |                 |         |
| cg20735682 | 6  | 168,665,386 | 2.79E-13 | 0.231 | 0.202 |          |       |  |                 |         |
| cg11234688 | 2  | 1,609,660   | 1.96E-07 | 0.231 | 0.218 |          |       |  |                 |         |
| cg17438030 | 5  | 72,526,379  | 3.24E-06 | 0.231 | 0.198 |          |       |  |                 |         |
| cg22057234 | 20 | 34,206,710  | 9.67E-06 | 0.231 | 0.168 |          |       |  | <i>SPAG4</i>    | Body    |
| cg12917718 | 13 | 70,682,019  | 0.000936 | 0.231 | 0.182 |          |       |  | <i>KLHL1</i>    | 1stExon |
| cg19025525 | 1  | 228,566,824 | 0.008409 | 0.231 | 0.218 |          |       |  |                 |         |
| cg23248357 | 5  | 2,755,376   | 1.12E-06 | 0.231 | 0.219 |          |       |  | <i>C5orf38</i>  | 3'UTR   |
| cg26380291 | 10 | 114,787,843 | 5.46E-07 | 0.231 | 0.221 |          |       |  | <i>TCF7L2</i>   | Body    |
| cg05250797 | 16 | 70,222,502  | 0.000142 | 0.231 | 0.159 |          |       |  |                 |         |
| cg07589342 | 1  | 212,392,508 | 1.1E-07  | 0.231 | 0.234 |          |       |  |                 |         |
| cg02588107 | 1  | 207,669,716 | 0.0266   | 0.231 | 0.236 |          |       |  | <i>CR1</i>      | 1stExon |
| cg04376709 | 2  | 106,055,450 | 3.07E-22 | 0.231 | 0.222 |          |       |  | <i>FHL2</i>     | TSS1500 |
| cg25018049 | 1  | 201,472,826 | 1.11E-06 | 0.231 | 0.239 |          |       |  | <i>CSRP1</i>    | 5'UTR   |

|            |    |             |          |       |       |          |       |  |                 |         |
|------------|----|-------------|----------|-------|-------|----------|-------|--|-----------------|---------|
| cg02430797 | 10 | 50,969,719  | 0.038931 | 0.231 | 0.230 |          |       |  | <i>OGDHL</i>    | 5'UTR   |
| cg18991169 | 11 | 31,843,388  | 0.001705 | 0.231 | 0.231 |          |       |  |                 |         |
| cg06151243 | 17 | 5,000,872   | 0.008087 | 0.231 | 0.139 |          |       |  |                 |         |
| cg09814029 | 1  | 39,212,920  | 0.004286 | 0.231 | 0.185 |          |       |  |                 |         |
| cg24425171 | 2  | 25,391,711  | 0.022571 | 0.231 | 0.134 |          |       |  | <i>POMC</i>     | TSS200  |
| cg13510429 | X  | 153,094,195 | 1.6E-06  | 0.231 | 0.176 |          |       |  | <i>PDZD4</i>    | Body    |
| cg14921884 | 8  | 54,442,043  | 4.94E-08 | 0.231 | 0.225 |          |       |  |                 |         |
| cg22519545 | 5  | 50,263,682  | 0.018384 | 0.231 | 0.215 |          |       |  |                 |         |
| cg07419144 | 18 | 55,100,658  | 0.010032 | 0.231 | 0.242 |          |       |  |                 |         |
| cg07942990 | 20 | 23,432,977  | 7.38E-08 | 0.231 | 0.256 |          |       |  | <i>CST11</i>    | Body    |
| cg09549240 | 15 | 75,250,560  | 0.024742 | 0.231 | 0.257 |          |       |  | <i>RPP25</i>    | TSS1500 |
| cg11432962 | 13 | 95,354,741  | 0.00033  | 0.231 | 0.243 |          |       |  |                 |         |
| cg04942516 | 2  | 106,055,458 | 1.13E-25 | 0.231 | 0.224 |          |       |  | <i>FHL2</i>     | TSS1500 |
| cg21690921 | 1  | 240,562,805 | 6.96E-10 | 0.231 | 0.238 |          |       |  | <i>FMN2</i>     | Body    |
| cg13414629 | 9  | 132,935,646 | 0.04908  | 0.231 | 0.161 |          |       |  | <i>FREQ</i>     | Body    |
| cg04569897 | 6  | 45,609,407  | 0.011562 | 0.231 | 0.108 |          |       |  |                 |         |
| cg14557487 | 2  | 162,279,686 | 0.00013  | 0.231 | 0.209 |          |       |  | <i>TBR1</i>     | Body    |
| cg20737812 | 15 | 86,336,631  | 1.17E-16 | 0.231 | 0.217 |          |       |  | <i>KLHL25</i>   | 5'UTR   |
| cg00505001 | 13 | 36,049,807  | 0.039379 | 0.231 | 0.225 |          |       |  | <i>MAB21L1</i>  | 1stExon |
| cg01511806 | 16 | 85,157,939  | 7.74E-12 | 0.231 | 0.225 |          |       |  |                 |         |
| cg04567731 | 17 | 59,532,519  | 4.37E-05 | 0.231 | 0.200 |          |       |  | <i>TBX4</i>     | TSS1500 |
| cg07501919 | 2  | 219,857,231 | 1.09E-05 | 0.231 | 0.223 |          |       |  | <i>CRYBA2</i>   | Body    |
| cg14129775 | 4  | 107,957,941 | 0.000272 | 0.231 | 0.209 |          |       |  | <i>DKK2</i>     | TSS1500 |
| cg21390363 | 17 | 18,171,734  | 2.87E-16 | 0.231 | 0.242 |          |       |  |                 |         |
| cg07476508 | 11 | 111,783,355 | 0.00171  | 0.231 | 0.304 |          |       |  | <i>CRYAB</i>    | TSS1500 |
| cg14328415 | 9  | 139,847,314 | 1.4E-99  | 0.231 | 0.232 |          |       |  | <i>LCN12</i>    | Body    |
| cg11982546 | 8  | 56,832,362  | 2.11E-28 | 0.231 | 0.230 |          |       |  | <i>LYN</i>      | 5'UTR   |
| cg18282791 | 6  | 26,332,501  | 0.016674 | 0.231 | 0.187 |          |       |  |                 |         |
| cg22637890 | 11 | 95,954,652  | 2.38E-08 | 0.231 | 0.211 |          |       |  | <i>MAML2</i>    | Body    |
| cg26756396 | 19 | 7,459,296   | 0.004357 | 0.231 | 0.246 |          |       |  | <i>ARHGEF18</i> | TSS1500 |
| cg07072704 | 22 | 45,899,736  | 2.56E-13 | 0.231 | 0.228 |          |       |  | <i>FBLN1</i>    | Body    |
| cg11591485 | 3  | 124,839,640 | 1.36E-15 | 0.231 | 0.218 |          |       |  | <i>SLC12A8</i>  | Body    |
| cg16072304 | 5  | 153,859,646 | 0.013207 | 0.231 | 0.257 |          |       |  |                 |         |
| cg19797376 | 1  | 47,695,475  | 0.002564 | 0.231 | 0.168 | 2.56E-20 | 0.205 |  | <i>TAL1</i>     | TSS200  |

|            |    |             |          |       |       |          |       |  |                  |         |
|------------|----|-------------|----------|-------|-------|----------|-------|--|------------------|---------|
| cg08390877 | 2  | 119,615,998 | 0.008185 | 0.231 | 0.310 |          |       |  |                  |         |
| cg15013617 | 20 | 2,795,378   | 8.77E-08 | 0.231 | 0.205 |          |       |  | <i>C20orf141</i> | TSS1500 |
| cg22462010 | 8  | 124,173,385 | 1.74E-06 | 0.231 | 0.216 |          |       |  |                  |         |
| cg22705929 | 11 | 57,417,974  | 1.44E-05 | 0.231 | 0.163 | 1.62E-09 | 0.147 |  | <i>YPEL4</i>     | TSS1500 |
| cg24183566 | 7  | 101,629,430 | 5.49E-13 | 0.231 | 0.241 |          |       |  | <i>CUX1</i>      | Body    |
| cg02973171 | 11 | 82,443,614  | 7.17E-07 | 0.231 | 0.226 |          |       |  | <i>FAM181B</i>   | 1stExon |
| cg18837542 | 4  | 139,610,152 | 9.22E-14 | 0.231 | 0.218 |          |       |  |                  |         |
| cg10472919 | 5  | 135,266,805 | 3.04E-07 | 0.231 | 0.211 |          |       |  | <i>FBXL21</i>    | 5'UTR   |
| cg18733548 | 17 | 77,766,817  | 1.05E-06 | 0.231 | 0.219 |          |       |  |                  |         |
| cg23967293 | 6  | 37,550,213  | 1.33E-11 | 0.231 | 0.218 |          |       |  |                  |         |
| cg14381712 | 1  | 12,546,623  | 0.001522 | 0.231 | 0.138 |          |       |  | <i>VPS13D</i>    | Body    |
| cg26414521 | 12 | 132,899,974 | 1.62E-05 | 0.231 | 0.270 |          |       |  | <i>GALNT9</i>    | Body    |
| cg03601920 | 1  | 17,445,310  | 1.29E-07 | 0.231 | 0.217 |          |       |  | <i>PADI2</i>     | Body    |
| cg04707332 | 1  | 119,528,018 | 9.72E-23 | 0.231 | 0.220 |          |       |  | <i>TBX15</i>     | 5'UTR   |
| cg19572487 | 17 | 38,476,024  | 0.000148 | 0.231 | 0.176 |          |       |  | <i>RARA</i>      | 5'UTR   |
| cg07986058 | 15 | 26,094,704  | 0.000465 | 0.231 | 0.139 |          |       |  | <i>ATP10A</i>    | Body    |
| cg10230190 | 1  | 85,405,081  | 5.7E-12  | 0.231 | 0.235 |          |       |  | <i>MCOLN2</i>    | Body    |
| cg20480642 | 8  | 52,722,185  | 1.02E-09 | 0.231 | 0.216 |          |       |  | <i>PXDNL</i>     | TSS200  |
| cg07119973 | 17 | 43,109,221  | 3.72E-09 | 0.231 | 0.237 |          |       |  | <i>DCAKD</i>     | Body    |
| cg15448210 | 6  | 33,401,514  | 7.21E-21 | 0.231 | 0.230 |          |       |  | <i>SYNGAP1</i>   | Body    |
| cg17085688 | 7  | 93,540,134  | 0.033512 | 0.231 | 0.113 |          |       |  | <i>GNGT1</i>     | Body    |
| cg22019158 | 1  | 27,926,683  | 6.64E-09 | 0.231 | 0.229 |          |       |  | <i>AHDC1</i>     | 5'UTR   |
| cg06758644 | 1  | 12,533,120  | 2.35E-09 | 0.231 | 0.210 |          |       |  | <i>VPS13D</i>    | Body    |
| cg06770429 | 6  | 143,206,075 | 1.42E-21 | 0.231 | 0.210 |          |       |  | <i>HIVEP2</i>    | 5'UTR   |
| cg07747133 | 3  | 181,428,307 | 3.95E-06 | 0.231 | 0.218 |          |       |  | <i>SOX2OT</i>    | Body    |
| cg22012659 | 1  | 112,506,949 | 9.94E-12 | 0.231 | 0.210 |          |       |  | <i>KCND3</i>     | Body    |
| cg10996327 | 10 | 94,180,743  | 0.00091  | 0.231 | 0.205 |          |       |  |                  |         |
| cg07078225 | 12 | 52,652,377  | 0.016773 | 0.231 | 0.151 |          |       |  |                  |         |
| cg08757037 | 7  | 75,933,294  | 0.013807 | 0.231 | 0.313 |          |       |  | <i>HSPB1</i>     | Body    |
| cg21525032 | 17 | 80,372,493  | 0.003099 | 0.231 | 0.228 |          |       |  | <i>C17orf101</i> | Body    |
| cg11744777 | 6  | 27,799,370  | 0.002495 | 0.231 | 0.190 |          |       |  | <i>HIST1H4K</i>  | TSS200  |
| cg14041778 | 1  | 33,938,210  | 0.02355  | 0.231 | 0.189 |          |       |  | <i>ZSCAN20</i>   | TSS200  |
| cg24396358 | 6  | 32,977,400  | 0.000463 | 0.231 | 0.249 |          |       |  | <i>HLA-DOA</i>   | TSS200  |
| cg14990644 | 5  | 112,771,691 | 0.000196 | 0.231 | 0.226 |          |       |  | <i>TSSK1B</i>    | TSS1500 |

|            |    |             |          |       |       |            |       |  |                |         |
|------------|----|-------------|----------|-------|-------|------------|-------|--|----------------|---------|
| cg22932427 | 1  | 155,615,664 | 2.35E-09 | 0.231 | 0.246 |            |       |  |                |         |
| cg07267294 | 5  | 58,893,722  | 3.57E-19 | 0.231 | 0.221 |            |       |  | <i>PDE4D</i>   | Body    |
| cg22668218 | 6  | 161,100,017 | 0.00028  | 0.231 | 0.193 |            |       |  |                |         |
| cg27532722 | 22 | 24,115,568  | 2.32E-08 | 0.231 | 0.179 | 3.79E-14   | 0.134 |  | <i>MMP11</i>   | Body    |
| cg21620540 | 11 | 12,031,314  | 1.43E-05 | 0.231 | 0.150 |            |       |  | <i>DKK3</i>    | TSS1500 |
| cg26014634 | 17 | 70,113,514  | 5.63E-05 | 0.231 | 0.230 |            |       |  |                |         |
| cg26444951 | 4  | 13,530,269  | 0.035735 | 0.231 | 0.276 |            |       |  |                |         |
| cg11986760 | 2  | 112,420,098 | 6.3E-10  | 0.231 | 0.242 |            |       |  |                |         |
| cg25726080 | 1  | 167,682,729 | 2.06E-05 | 0.231 | 0.200 |            |       |  |                |         |
| cg08911368 | 8  | 11,471,085  | 0.002134 | 0.231 | 0.163 |            |       |  |                |         |
| cg18087477 | 1  | 115,397,597 | 1.55E-08 | 0.231 | 0.215 | 8.02E-13   | 0.149 |  | <i>SYCP1</i>   | 1stExon |
| cg03096746 | 6  | 29,795,436  | 1.27E-06 | 0.231 | 0.232 |            |       |  | <i>HLA-G</i>   | 5'UTR   |
| cg07730329 | 5  | 140,810,137 | 0.000315 | 0.230 | 0.249 | 1.31E-19   | 0.188 |  | <i>PCDHGA4</i> | Body    |
| cg23930313 | 12 | 25,056,083  | 0.023458 | 0.230 | 0.275 |            |       |  | <i>BCAT1</i>   | Body    |
| cg24837370 | 2  | 5,833,774   | 0.011304 | 0.230 | 0.226 |            |       |  | <i>SOX11</i>   | 1stExon |
| cg26678138 | 4  | 184,642,625 | 5.21E-05 | 0.230 | 0.213 |            |       |  |                |         |
| cg06515144 | 1  | 179,545,091 | 0.049747 | 0.230 | 0.252 |            |       |  | <i>NPHS2</i>   | TSS200  |
| cg19821297 | 19 | 12,890,029  | 1.07E-08 | 0.230 | 0.217 |            |       |  |                |         |
| cg20086517 | 8  | 30,588,468  | 2.08E-54 | 0.230 | 0.221 |            |       |  |                |         |
| cg03388193 | 10 | 100,996,070 | 0.030347 | 0.230 | 0.241 | 6.22E-11   | 0.170 |  | <i>HPSE2</i>   | TSS1500 |
| cg08795320 | 16 | 66,982,803  | 7.88E-11 | 0.230 | 0.231 |            |       |  |                |         |
| cg11638298 | 4  | 188,917,173 | 4.79E-09 | 0.230 | 0.225 |            |       |  | <i>ZFP42</i>   | 5'UTR   |
| cg14039246 | 1  | 53,365,446  | 4.72E-08 | 0.230 | 0.201 |            |       |  | <i>ECHDC2</i>  | Body    |
| cg26393015 | 7  | 128,809,301 | 9.44E-05 | 0.230 | 0.202 |            |       |  |                |         |
| cg01640808 | X  | 21,674,815  | 1.43E-06 | 0.230 | 0.203 |            |       |  | <i>KLHL34</i>  | 1stExon |
| cg13931292 | 1  | 114,698,448 | 0.000447 | 0.230 | 0.239 |            |       |  |                |         |
| cg25446789 | 2  | 25,810,393  | 8.5E-08  | 0.230 | 0.234 |            |       |  | <i>DTNB</i>    | Body    |
| cg05293365 | 15 | 77,287,338  | 8.54E-14 | 0.230 | 0.227 |            |       |  | <i>PSTPIP1</i> | TSS200  |
| cg20080624 | 7  | 96,651,111  | 4.58E-06 | 0.230 | 0.215 | 0.02595709 | 0.053 |  | <i>DLX5</i>    | Body    |
| cg05000994 | 7  | 27,131,807  | 6.18E-08 | 0.230 | 0.226 |            |       |  |                |         |
| cg07307078 | 18 | 12,307,630  | 0.000194 | 0.230 | 0.220 | 3.77E-07   | 0.087 |  | <i>TUBB6</i>   | TSS1500 |
| cg10885779 | 11 | 34,331,908  | 7.13E-10 | 0.230 | 0.232 |            |       |  | <i>ABTB2</i>   | Body    |
| cg15904283 | 10 | 23,484,867  | 0.010411 | 0.230 | 0.322 |            |       |  |                |         |
| cg27297441 | 10 | 134,918,671 | 0.000588 | 0.230 | 0.227 |            |       |  | <i>GPR123</i>  | Body    |

|            |    |             |          |       |       |  |  |     |                 |         |
|------------|----|-------------|----------|-------|-------|--|--|-----|-----------------|---------|
| cg08281371 | 17 | 76,662,056  | 1.04E-06 | 0.230 | 0.219 |  |  |     |                 |         |
| cg18912855 | 14 | 105,830,859 | 0.049432 | 0.230 | 0.113 |  |  |     | <i>PACS2</i>    | Body    |
| cg18539461 | 1  | 201,709,675 | 0.003683 | 0.230 | 0.195 |  |  |     | <i>NAV1</i>     | Body    |
| cg03760457 | 15 | 70,326,230  | 1.09E-10 | 0.230 | 0.209 |  |  |     |                 |         |
| cg09015433 | 8  | 57,359,970  | 0.002261 | 0.230 | 0.224 |  |  |     | <i>PENK</i>     | TSS1500 |
| cg10550882 | 20 | 1,825,647   | 0.003552 | 0.230 | 0.181 |  |  |     |                 |         |
| cg13496662 | 19 | 45,416,369  | 1.01E-10 | 0.230 | 0.243 |  |  |     |                 |         |
| cg18603577 | 12 | 123,900,102 | 1.89E-07 | 0.230 | 0.236 |  |  |     | <i>RILPL2</i>   | 3'UTR   |
| cg23690904 | 4  | 4,387,697   | 0.003148 | 0.230 | 0.242 |  |  |     | <i>D4S234E</i>  | TSS1500 |
| cg03421358 | 17 | 17,479,100  | 9.49E-06 | 0.230 | 0.285 |  |  |     | <i>PEMT</i>     | Body    |
| cg16683770 | 20 | 21,000,992  | 0.01224  | 0.230 | 0.263 |  |  |     |                 |         |
| cg03612413 | 21 | 38,066,918  | 0.000963 | 0.230 | 0.280 |  |  |     |                 |         |
| cg07542748 | 7  | 4,885,643   | 2.74E-05 | 0.230 | 0.196 |  |  |     | <i>RADIL</i>    | Body    |
| cg08208460 | 19 | 39,687,865  | 0.038443 | 0.230 | 0.322 |  |  |     | <i>NCCRP1</i>   | 1stExon |
| cg09556527 | 1  | 1,239,259   | 1.22E-17 | 0.230 | 0.230 |  |  |     | <i>ACAP3</i>    | Body    |
| cg11585893 | 12 | 54,447,430  | 6.12E-07 | 0.230 | 0.198 |  |  |     | <i>HOXC4</i>    | 5'UTR   |
| cg24438217 | 4  | 39,980,114  | 2.72E-14 | 0.230 | 0.228 |  |  |     | <i>PDS5A</i>    | TSS1500 |
| cg26339162 | 14 | 68,509,470  | 0.000192 | 0.230 | 0.204 |  |  |     | <i>RAD51L1</i>  | Body    |
| cg13861244 | 1  | 18,214,635  | 8.66E-07 | 0.230 | 0.191 |  |  |     |                 |         |
| cg23514016 | 5  | 78,407,564  | 1.32E-06 | 0.230 | 0.223 |  |  |     | <i>BHMT</i>     | TSS200  |
| cg09396295 | 17 | 66,196,681  | 0.000515 | 0.230 | 0.231 |  |  |     |                 |         |
| cg14533390 | 3  | 65,342,843  | 7.45E-09 | 0.230 | 0.226 |  |  |     | <i>MAGI1</i>    | Body    |
| cg21397588 | 1  | 203,598,954 | 0.008973 | 0.230 | 0.187 |  |  |     | <i>ATP2B4</i>   | 5'UTR   |
| cg10477905 | 2  | 177,039,295 | 0.001665 | 0.230 | 0.221 |  |  |     |                 |         |
| cg21996351 | 1  | 205,326,059 | 4.59E-42 | 0.230 | 0.221 |  |  |     | <i>KLHDC8A</i>  | TSS200  |
| cg11336311 | 1  | 23,887,324  | 3.77E-20 | 0.230 | 0.236 |  |  | Yes | <i>ID3</i>      | TSS1500 |
| cg25082959 | 13 | 103,046,930 | 0.048582 | 0.230 | 0.176 |  |  |     | <i>FGF14</i>    | Body    |
| cg27387239 | 1  | 218,667,548 | 2.04E-08 | 0.230 | 0.225 |  |  |     |                 |         |
| cg05810170 | 4  | 1,049,609   | 0.003086 | 0.230 | 0.169 |  |  |     |                 |         |
| cg23901857 | 2  | 176,993,221 | 7.37E-06 | 0.230 | 0.196 |  |  |     | <i>HOXD8</i>    | TSS1500 |
| cg24876187 | 6  | 31,126,871  | 0.001202 | 0.230 | 0.185 |  |  |     | <i>CCHCR1</i>   | TSS1500 |
| cg07888912 | 19 | 11,305,913  | 4.12E-05 | 0.230 | 0.189 |  |  |     | <i>KANK2</i>    | 5'UTR   |
| cg16822407 | 1  | 15,392,852  | 2.79E-05 | 0.230 | 0.233 |  |  |     | <i>KIAA1026</i> | Body    |
| cg24452591 | 12 | 47,224,823  | 0.007596 | 0.230 | 0.112 |  |  |     |                 |         |

|            |    |             |          |       |       |  |  |  |                 |         |
|------------|----|-------------|----------|-------|-------|--|--|--|-----------------|---------|
| cg17421991 | 7  | 156,795,356 | 0.045478 | 0.230 | 0.204 |  |  |  |                 |         |
| cg15554023 | 1  | 144,008,937 | 3.38E-09 | 0.230 | 0.239 |  |  |  |                 |         |
| cg23206209 | 15 | 53,079,494  | 0.013831 | 0.230 | 0.153 |  |  |  | <i>ONECUT1</i>  | Body    |
| cg26654798 | 15 | 83,953,864  | 4.2E-07  | 0.230 | 0.223 |  |  |  | <i>BNC1</i>     | TSS1500 |
| cg01517500 | 2  | 10,637,974  | 0.000114 | 0.230 | 0.219 |  |  |  |                 |         |
| cg08696165 | 2  | 45,172,169  | 0.002597 | 0.230 | 0.293 |  |  |  | <i>SIX3</i>     | 3'UTR   |
| cg14780276 | 4  | 148,743,200 | 1.29E-09 | 0.230 | 0.213 |  |  |  | <i>ARHGAP10</i> | Body    |
| cg23754924 | 15 | 93,616,943  | 4.2E-07  | 0.230 | 0.191 |  |  |  | <i>RGMA</i>     | Body    |
| cg02633371 | 17 | 35,298,618  | 1.11E-05 | 0.230 | 0.196 |  |  |  | <i>LHX1</i>     | Body    |
| cg09024228 | 1  | 116,707,400 | 6.12E-09 | 0.230 | 0.250 |  |  |  |                 |         |
| cg15591803 | 1  | 111,733,668 | 5.99E-08 | 0.230 | 0.191 |  |  |  | <i>DENND2D</i>  | Body    |
| cg21929183 | 5  | 140,807,225 | 0.024464 | 0.230 | 0.291 |  |  |  | <i>PCDHGA4</i>  | Body    |
| cg24693341 | 4  | 41,746,947  | 0.03673  | 0.230 | 0.248 |  |  |  | <i>PHOX2B</i>   | 3'UTR   |
| cg06373648 | 6  | 33,401,536  | 2.21E-15 | 0.230 | 0.226 |  |  |  | <i>SYNGAP1</i>  | Body    |
| cg01558645 | 4  | 71,587,904  | 4.17E-13 | 0.230 | 0.218 |  |  |  | <i>RUFY3</i>    | 1stExon |
| cg27160952 | 21 | 44,089,142  | 0.000237 | 0.230 | 0.249 |  |  |  | <i>PDE9A</i>    | Body    |
| cg20699141 | 3  | 182,698,915 | 0.000182 | 0.230 | 0.142 |  |  |  | <i>DCUN1D1</i>  | TSS1500 |
| cg12165546 | 8  | 23,566,799  | 0.001395 | 0.230 | 0.225 |  |  |  |                 |         |
| cg14085358 | 2  | 176,949,017 | 0.009432 | 0.230 | 0.237 |  |  |  | <i>EVX2</i>     | TSS1500 |
| cg20023120 | 11 | 69,830,611  | 0.004331 | 0.230 | 0.220 |  |  |  |                 |         |
| cg23676151 | 6  | 108,491,372 | 0.00044  | 0.230 | 0.268 |  |  |  | <i>NR2E1</i>    | Body    |
| cg24139639 | 5  | 3,605,884   | 0.002821 | 0.230 | 0.291 |  |  |  |                 |         |
| cg26607897 | 1  | 167,510,839 | 0.000689 | 0.230 | 0.242 |  |  |  | <i>CREG1</i>    | 3'UTR   |
| cg11441379 | 12 | 63,026,424  | 0.022706 | 0.230 | 0.180 |  |  |  |                 |         |
| cg12403137 | 11 | 89,867,809  | 0.003942 | 0.230 | 0.277 |  |  |  | <i>NAALAD2</i>  | TSS200  |
| cg10603156 | 10 | 13,732,625  | 1.02E-10 | 0.230 | 0.240 |  |  |  | <i>FRMD4A</i>   | Body    |
| cg14554869 | 5  | 74,231,171  | 0.007545 | 0.230 | 0.276 |  |  |  |                 |         |
| cg18390991 | 2  | 217,672,659 | 6.95E-16 | 0.230 | 0.241 |  |  |  |                 |         |
| cg25349276 | 4  | 41,614,591  | 1.67E-09 | 0.230 | 0.205 |  |  |  | <i>LIMCH1</i>   | Body    |
| cg10056203 | 10 | 13,571,816  | 4.31E-11 | 0.230 | 0.200 |  |  |  |                 |         |
| cg13523649 | 20 | 37,230,741  | 5.99E-12 | 0.230 | 0.234 |  |  |  | <i>C20orf95</i> | Body    |
| cg25406779 | 19 | 40,732,712  | 0.006092 | 0.230 | 0.120 |  |  |  | <i>CNTD2</i>    | TSS200  |
| cg25647583 | 15 | 91,427,184  | 2.32E-14 | 0.230 | 0.235 |  |  |  | <i>FES</i>      | TSS1500 |
| cg02538248 | 16 | 75,045,643  | 1.2E-14  | 0.230 | 0.209 |  |  |  | <i>ZNRF1</i>    | Body    |



|            |    |             |          |       |       |          |       |  |                  |         |
|------------|----|-------------|----------|-------|-------|----------|-------|--|------------------|---------|
| cg11070193 | 1  | 26,527,870  | 8.76E-08 | 0.230 | 0.225 |          |       |  | <i>CATSPER4</i>  | Body    |
| cg09319061 | 12 | 109,128,198 | 1.32E-07 | 0.230 | 0.274 |          |       |  |                  |         |
| cg09690483 | 2  | 202,992,863 | 4.04E-08 | 0.230 | 0.254 |          |       |  |                  |         |
| cg21045608 | 11 | 8,615,456   | 0.016523 | 0.230 | 0.209 |          |       |  | <i>STK33</i>     | 1stExon |
| cg01528028 | 13 | 100,649,800 | 0.000321 | 0.230 | 0.241 |          |       |  |                  |         |
| cg11755796 | 20 | 19,192,616  | 0.015644 | 0.230 | 0.125 |          |       |  | <i>SLC24A3</i>   | TSS1500 |
| cg00991994 | 3  | 99,639,553  | 7.4E-15  | 0.230 | 0.240 |          |       |  | <i>C3orf26</i>   | Body    |
| cg10227187 | 16 | 2,030,509   | 0.024929 | 0.230 | 0.305 |          |       |  | <i>NOXO1</i>     | Body    |
| cg17427305 | 15 | 57,881,059  | 2.81E-20 | 0.230 | 0.210 |          |       |  |                  |         |
| cg21911276 | 18 | 55,289,797  | 3.67E-05 | 0.230 | 0.192 |          |       |  | <i>NARS</i>      | TSS1500 |
| cg25070373 | 2  | 200,966,980 | 2.84E-09 | 0.230 | 0.203 |          |       |  |                  |         |
| cg01091951 | 5  | 42,993,450  | 0.012062 | 0.230 | 0.232 |          |       |  |                  |         |
| cg01638185 | 17 | 64,530,027  | 1.12E-09 | 0.230 | 0.231 |          |       |  | <i>PRKCA</i>     | Body    |
| cg09888468 | 15 | 81,410,853  | 0.004087 | 0.230 | 0.208 |          |       |  |                  |         |
| cg07123069 | 12 | 54,367,250  | 0.000154 | 0.230 | 0.189 | 7.14E-13 | 0.169 |  | <i>HOXC11</i>    | 1stExon |
| cg07910724 | 3  | 117,604,411 | 0.034147 | 0.230 | 0.219 |          |       |  |                  |         |
| cg14875081 | 2  | 96,814,660  | 6.62E-08 | 0.230 | 0.218 |          |       |  |                  |         |
| cg17279839 | 7  | 150,038,598 | 1.96E-05 | 0.230 | 0.231 | 1.19E-25 | 0.200 |  | <i>RARRES2</i>   | 5'UTR   |
| cg17912835 | 2  | 105,478,804 | 2.61E-07 | 0.230 | 0.224 |          |       |  |                  |         |
| cg26512226 | 2  | 220,282,165 | 5.21E-13 | 0.230 | 0.213 |          |       |  | <i>DES</i>       | TSS1500 |
| cg27534599 | 22 | 17,680,477  | 1.45E-05 | 0.230 | 0.200 |          |       |  | <i>CECR1</i>     | Body    |
| cg02833172 | 16 | 84,774,950  | 1.35E-05 | 0.230 | 0.222 |          |       |  | <i>USP10</i>     | Body    |
| cg11050612 | 3  | 149,374,066 | 0.017991 | 0.230 | 0.168 |          |       |  | <i>WWTR1</i>     | Body    |
| cg16002660 | 17 | 2,310,278   | 2.06E-05 | 0.230 | 0.216 |          |       |  | <i>LOC284009</i> | Body    |
| cg02273889 | 5  | 123,941,379 | 3.87E-08 | 0.230 | 0.241 |          |       |  |                  |         |
| cg08917933 | 1  | 19,615,303  | 7.98E-06 | 0.230 | 0.231 |          |       |  | <i>AKR7A3</i>    | TSS200  |
| cg09426383 | 7  | 26,897,182  | 3.66E-08 | 0.230 | 0.196 |          |       |  | <i>SKAP2</i>     | Body    |
| cg16646024 | 5  | 175,560,307 | 0.003903 | 0.230 | 0.211 |          |       |  |                  |         |
| cg19572014 | 2  | 24,232,681  | 9.78E-05 | 0.230 | 0.165 |          |       |  | <i>MFSD2B</i>    | TSS1500 |
| cg23447239 | 7  | 157,697,628 | 7.98E-12 | 0.230 | 0.221 |          |       |  | <i>PTPRN2</i>    | Body    |
| cg26221992 | 6  | 74,024,572  | 0.018944 | 0.230 | 0.243 |          |       |  |                  |         |
| cg09612786 | 7  | 150,715,214 | 0.004118 | 0.230 | 0.266 |          |       |  | <i>ATG9B</i>     | Body    |
| cg15511381 | 18 | 35,147,532  | 0.023248 | 0.230 | 0.163 |          |       |  |                  |         |
| cg26606286 | 4  | 174,440,471 | 0.001272 | 0.230 | 0.225 |          |       |  |                  |         |

|            |    |             |          |       |       |           |       |     |                 |         |
|------------|----|-------------|----------|-------|-------|-----------|-------|-----|-----------------|---------|
| cg15732768 | 7  | 96,651,537  | 1.36E-06 | 0.230 | 0.224 |           |       |     | <i>DLX5</i>     | Body    |
| cg24335895 | 19 | 36,643,771  | 1.46E-07 | 0.230 | 0.244 |           |       |     | <i>COX7A1</i>   | TSS200  |
| cg04518808 | 19 | 54,384,822  | 0.000934 | 0.230 | 0.277 |           |       |     | <i>PRKCG</i>    | TSS1500 |
| cg05322916 | 6  | 36,880,416  | 3.36E-06 | 0.230 | 0.198 |           |       |     | <i>C6orf89</i>  | Body    |
| cg24375218 | 18 | 46,461,399  | 3.5E-10  | 0.230 | 0.221 |           |       |     | <i>SMAD7</i>    | Body    |
| cg26364899 | 3  | 12,329,070  | 0.029074 | 0.230 | 0.384 |           |       |     | <i>PPARG</i>    | TSS1500 |
| cg02137183 | 7  | 141,250,424 | 4.35E-19 | 0.230 | 0.227 |           |       |     | <i>AGK</i>      | TSS1500 |
| cg00731232 | 9  | 18,437,917  | 2.5E-14  | 0.230 | 0.237 |           |       |     |                 |         |
| cg11577716 | 20 | 20,258,001  | 0.001175 | 0.230 | 0.175 |           |       |     | <i>C20orf26</i> | Body    |
| cg13484553 | 9  | 137,990,330 | 0.012238 | 0.230 | 0.173 |           |       |     | <i>OLFM1</i>    | Body    |
| cg18803104 | 6  | 28,956,324  | 0.000161 | 0.230 | 0.221 |           |       |     |                 |         |
| cg21968515 | 11 | 62,694,099  | 2.7E-05  | 0.230 | 0.212 |           |       |     |                 |         |
| cg00912580 | 2  | 135,169,533 | 3.86E-11 | 0.230 | 0.216 |           |       |     | <i>MGAT5</i>    | Body    |
| cg26129545 | 5  | 149,792,330 | 0.039179 | 0.230 | 0.058 |           |       |     | <i>CD74</i>     | 1stExon |
| cg02249657 | 5  | 140,873,765 | 1.17E-10 | 0.230 | 0.240 |           |       |     | <i>PCDHGA4</i>  | Body    |
| cg18728025 | 4  | 121,991,645 | 1.04E-08 | 0.230 | 0.230 |           |       |     | <i>C4orf31</i>  | 5'UTR   |
| cg25747427 | 15 | 89,561,135  | 0.007663 | 0.230 | 0.198 |           |       |     |                 |         |
| cg06172942 | 3  | 50,378,529  | 2.02E-06 | 0.230 | 0.232 |           |       |     | <i>RASSF1</i>   | TSS200  |
| cg13342435 | 11 | 30,605,787  | 0.021927 | 0.230 | 0.236 |           |       |     | <i>MPPED2</i>   | 5'UTR   |
| cg14787269 | 19 | 46,380,394  | 1.1E-13  | 0.230 | 0.219 |           |       |     |                 |         |
| cg04182378 | X  | 21,958,416  | 0.004743 | 0.230 | 0.280 |           |       |     | <i>SMS</i>      | TSS1500 |
| cg16345647 | 21 | 38,378,406  | 0.000244 | 0.230 | 0.202 |           |       | Yes | <i>DSCR6</i>    | TSS1500 |
| cg01920232 | 12 | 106,976,668 | 0.00143  | 0.230 | 0.199 | 2.18E-18  | 0.151 |     | <i>RFX4</i>     | TSS1500 |
| cg11241627 | 7  | 19,185,165  | 0.008192 | 0.230 | 0.269 | 0.0000164 | 0.068 |     | <i>FERD3L</i>   | TSS200  |
| cg27485646 | X  | 38,080,412  | 0.016066 | 0.230 | 0.203 |           |       |     | <i>SRPX</i>     | TSS1500 |
| cg03276408 | 13 | 112,712,475 | 0.000149 | 0.230 | 0.268 |           |       |     |                 |         |
| cg00374016 | 15 | 24,722,944  | 0.00012  | 0.230 | 0.238 |           |       |     |                 |         |
| cg19012170 | 15 | 65,715,664  | 0.001005 | 0.230 | 0.280 |           |       |     | <i>IGDCC4</i>   | TSS1500 |
| cg21405761 | 8  | 11,304,273  | 4.66E-15 | 0.230 | 0.219 |           |       | Yes | <i>FAM167A</i>  | 5'UTR   |
| cg27624162 | 2  | 111,876,008 | 3.76E-06 | 0.230 | 0.226 |           |       |     |                 |         |
| cg24234899 | 10 | 118,922,493 | 0.034828 | 0.230 | 0.174 |           |       |     |                 |         |
| cg13572309 | 12 | 16,758,267  | 0.001813 | 0.230 | 0.207 |           |       |     | <i>LMO3</i>     | 5'UTR   |
| cg26429783 | 1  | 245,753,302 | 1.03E-14 | 0.230 | 0.219 |           |       |     | <i>KIF26B</i>   | Body    |
| cg00920139 | 8  | 22,455,473  | 4.85E-12 | 0.230 | 0.236 |           |       |     | <i>PDLIM2</i>   | 3'UTR   |

|            |    |             |          |       |       |          |       |  |                 |         |
|------------|----|-------------|----------|-------|-------|----------|-------|--|-----------------|---------|
| cg06663149 | 4  | 41,457,558  | 4.92E-05 | 0.230 | 0.250 |          |       |  | <i>LIMCH1</i>   | Body    |
| cg23698476 | 19 | 4,607,318   | 0.008406 | 0.230 | 0.156 |          |       |  |                 |         |
| cg26734335 | 16 | 87,166,401  | 0.000117 | 0.230 | 0.251 |          |       |  |                 |         |
| cg00854172 | 2  | 23,748,104  | 8.57E-14 | 0.230 | 0.212 |          |       |  | <i>KLHL29</i>   | 5'UTR   |
| cg06214007 | 1  | 89,829,308  | 0.000588 | 0.230 | 0.238 | 2.65E-17 | 0.214 |  | <i>GBP6</i>     | TSS200  |
| cg00797651 | 1  | 207,494,336 | 1.52E-05 | 0.230 | 0.208 |          |       |  | <i>CD55</i>     | TSS1500 |
| cg10227830 | 4  | 144,332,828 | 4.58E-06 | 0.230 | 0.235 |          |       |  | <i>GAB1</i>     | Body    |
| cg01138867 | 5  | 160,975,792 | 0.027115 | 0.230 | 0.248 |          |       |  | <i>GABRB2</i>   | TSS1500 |
| cg04296203 | 2  | 242,985,752 | 0.000411 | 0.230 | 0.232 |          |       |  |                 |         |
| cg15315056 | 3  | 184,504,579 | 5.78E-06 | 0.229 | 0.213 |          |       |  |                 |         |
| cg04581214 | 19 | 1,267,741   | 7.27E-12 | 0.229 | 0.217 |          |       |  | <i>C19orf23</i> | Body    |
| cg06087019 | 3  | 27,770,182  | 0.00212  | 0.229 | 0.208 |          |       |  |                 |         |
| cg17498296 | 10 | 124,907,540 | 0.043032 | 0.229 | 0.159 |          |       |  | <i>HMX2</i>     | TSS200  |
| cg00579520 | 12 | 128,752,586 | 4.76E-06 | 0.229 | 0.190 |          |       |  | <i>TMEM132C</i> | Body    |
| cg04755365 | 14 | 100,625,253 | 0.00219  | 0.229 | 0.222 |          |       |  | <i>DEGS2</i>    | Body    |
| cg21735668 | 15 | 67,072,353  | 2.68E-13 | 0.229 | 0.224 |          |       |  | <i>SMAD6</i>    | Body    |
| cg21052608 | 5  | 81,652,962  | 0.004373 | 0.229 | 0.159 |          |       |  |                 |         |
| cg25514273 | 13 | 70,681,804  | 0.001301 | 0.229 | 0.207 |          |       |  | <i>KLHL1</i>    | 1stExon |
| cg09656020 | 15 | 33,009,409  | 0.000546 | 0.229 | 0.245 |          |       |  | <i>GREM1</i>    | TSS1500 |
| cg12345778 | 12 | 49,364,094  | 7.64E-07 | 0.229 | 0.181 |          |       |  | <i>WNT10B</i>   | Body    |
| cg12560421 | 7  | 2,656,527   | 3.58E-19 | 0.229 | 0.233 |          |       |  |                 |         |
| cg12831863 | 6  | 28,457,210  | 2.57E-06 | 0.229 | 0.219 |          |       |  |                 |         |
| cg00849990 | 8  | 86,090,773  | 4.73E-07 | 0.229 | 0.205 |          |       |  | <i>E2F5</i>     | Body    |
| cg13575422 | 9  | 91,608,364  | 5.27E-09 | 0.229 | 0.254 |          |       |  | <i>C9orf47</i>  | 3'UTR   |
| cg23375552 | 6  | 10,426,310  | 4.42E-08 | 0.229 | 0.263 |          |       |  |                 |         |
| cg03964111 | 7  | 150,498,493 | 1.12E-10 | 0.229 | 0.234 | 1.38E-16 | 0.127 |  | <i>TMEM176B</i> | TSS200  |
| cg15239238 | 11 | 16,629,389  | 0.001193 | 0.229 | 0.126 |          |       |  |                 |         |
| cg23679982 | 17 | 1,686,737   | 0.000909 | 0.229 | 0.137 |          |       |  | <i>SMYD4</i>    | Body    |
| cg00473179 | 15 | 29,033,881  | 3.07E-05 | 0.229 | 0.265 |          |       |  |                 |         |
| cg02285920 | 19 | 17,958,956  | 2.11E-06 | 0.229 | 0.191 |          |       |  | <i>JAK3</i>     | TSS200  |
| cg06226156 | 2  | 74,726,478  | 0.00115  | 0.229 | 0.236 |          |       |  | <i>LBX2</i>     | Body    |
| cg10136560 | 4  | 140,737,518 | 2.42E-07 | 0.229 | 0.241 |          |       |  | <i>MAML3</i>    | Body    |
| cg14614754 | 1  | 120,289,923 | 4.92E-13 | 0.229 | 0.222 |          |       |  |                 |         |
| cg15742751 | 1  | 155,213,747 | 0.001894 | 0.229 | 0.246 |          |       |  | <i>GBA</i>      | 5'UTR   |

|            |    |             |          |       |       |          |       |  |          |         |
|------------|----|-------------|----------|-------|-------|----------|-------|--|----------|---------|
| cg14531834 | 9  | 87,655,988  | 0.00472  | 0.229 | 0.297 |          |       |  |          |         |
| cg18814699 | 7  | 36,342,851  | 1.02E-09 | 0.229 | 0.163 |          |       |  |          |         |
| cg26297344 | 1  | 111,151,163 | 8.12E-08 | 0.229 | 0.226 |          |       |  |          |         |
| cg23123731 | 10 | 80,161,611  | 1.07E-06 | 0.229 | 0.217 |          |       |  |          |         |
| cg17620199 | 20 | 21,685,925  | 6.72E-06 | 0.229 | 0.269 |          |       |  | PAX1     | TSS1500 |
| cg16397884 | 5  | 132,082,837 | 0.003505 | 0.229 | 0.193 |          |       |  | CCNI2    | TSS1500 |
| cg16653620 | 2  | 162,284,135 | 0.015442 | 0.229 | 0.246 |          |       |  |          |         |
| cg23990272 | 1  | 25,906,648  | 2.72E-17 | 0.229 | 0.223 |          |       |  |          |         |
| cg05210258 | 13 | 102,569,538 | 0.041563 | 0.229 | 0.259 |          |       |  | FGF14    | Body    |
| cg26685246 | 6  | 32,805,692  | 4.96E-06 | 0.229 | 0.162 |          |       |  | TAP2     | Body    |
| cg12978433 | 20 | 52,789,956  | 0.028814 | 0.229 | 0.129 |          |       |  | CYP24A1  | 1stExon |
| cg00031162 | 17 | 7,453,377   | 6.11E-12 | 0.229 | 0.218 | 4.46E-14 | 0.136 |  | TNFSF12  | Body    |
| cg09978860 | 4  | 56,023,921  | 7.35E-05 | 0.229 | 0.241 |          |       |  |          |         |
| cg09553982 | 10 | 77,875,676  | 0.034388 | 0.229 | 0.095 |          |       |  | C10orf11 | Body    |
| cg14486905 | 2  | 171,677,602 | 0.00024  | 0.229 | 0.223 |          |       |  | GAD1     | Body    |
| cg12215739 | 2  | 177,014,966 | 5.62E-08 | 0.229 | 0.202 |          |       |  | HOXD4    | TSS1500 |
| cg25397636 | 7  | 1,896,220   | 3.06E-24 | 0.229 | 0.208 |          |       |  | MAD1L1   | Body    |
| cg01033938 | 11 | 130,298,880 | 0.00734  | 0.229 | 0.269 | 5.69E-21 | 0.192 |  | ADAMTS8  | TSS1500 |
| cg03636532 | 18 | 55,107,236  | 0.009519 | 0.229 | 0.239 |          |       |  | ONECUT2  | Body    |
| cg04007726 | 10 | 80,981,129  | 0.000418 | 0.229 | 0.260 |          |       |  | ZMIZ1    | Body    |
| cg04993276 | 1  | 65,730,339  | 6.02E-05 | 0.229 | 0.209 |          |       |  | DNAJC6   | TSS200  |
| cg09503045 | 19 | 55,592,453  | 0.000172 | 0.229 | 0.223 |          |       |  | EPS8L1   | Body    |
| cg25673591 | 17 | 39,945,814  | 5.51E-07 | 0.229 | 0.225 |          |       |  |          |         |
| cg17771050 | 10 | 47,083,342  | 0.000434 | 0.229 | 0.107 |          |       |  | PPYR1    | TSS200  |
| cg12195742 | 18 | 72,123,456  | 1.64E-08 | 0.229 | 0.179 |          |       |  | FAM69C   | Body    |
| cg12229555 | 17 | 80,260,329  | 2.84E-09 | 0.229 | 0.203 |          |       |  |          |         |
| cg17419888 | 2  | 23,840,555  | 5.23E-06 | 0.229 | 0.227 |          |       |  | KLHL29   | Body    |
| cg26181727 | 3  | 14,581,959  | 4.31E-06 | 0.229 | 0.254 |          |       |  | GRIP2    | Body    |
| cg02369820 | 4  | 6,200,609   | 0.020059 | 0.229 | 0.147 |          |       |  | JAKMIP1  | 5'UTR   |
| cg06660332 | 1  | 47,009,707  | 8.82E-06 | 0.229 | 0.244 |          |       |  |          |         |
| cg09920605 | 7  | 140,341,335 | 0.000111 | 0.229 | 0.224 |          |       |  |          |         |
| cg14300730 | 2  | 108,994,366 | 0.007021 | 0.229 | 0.131 |          |       |  | SULT1C4  | TSS200  |
| cg21614408 | 6  | 52,228,023  | 0.009604 | 0.229 | 0.131 |          |       |  | PAQR8    | 5'UTR   |
| cg01748757 | 17 | 54,230,996  | 3.12E-09 | 0.229 | 0.207 |          |       |  | ANKFN1   | Body    |

|            |    |             |          |       |       |          |       |     |                  |         |
|------------|----|-------------|----------|-------|-------|----------|-------|-----|------------------|---------|
| cg07917150 | 7  | 27,154,264  | 7.74E-06 | 0.229 | 0.211 |          |       |     | <i>HOXA3</i>     | 5'UTR   |
| cg14477581 | 9  | 72,899,321  | 1.27E-08 | 0.229 | 0.225 |          |       |     | <i>SMC5</i>      | Body    |
| cg02629070 | 6  | 41,394,156  | 5.25E-09 | 0.229 | 0.225 |          |       |     |                  |         |
| cg08776014 | 21 | 43,183,039  | 8.08E-10 | 0.229 | 0.196 |          |       |     | <i>RIPK4</i>     | Body    |
| cg26618058 | 12 | 118,022,239 | 4.01E-07 | 0.229 | 0.219 |          |       |     | <i>KSR2</i>      | Body    |
| cg12801917 | 17 | 15,417,503  | 1.25E-05 | 0.229 | 0.221 |          |       |     | <i>FAM18B2</i>   | Body    |
| cg25140419 | 1  | 221,050,742 | 4.34E-05 | 0.229 | 0.210 |          |       |     |                  |         |
| cg06890415 | 8  | 67,405,405  | 2.52E-06 | 0.229 | 0.206 |          |       |     | <i>C8orf46</i>   | TSS200  |
| cg14417760 | 15 | 27,111,749  | 0.000212 | 0.229 | 0.240 |          |       |     | <i>GABRA5</i>    | TSS1500 |
| cg11549972 | 12 | 103,358,649 | 0.000109 | 0.229 | 0.208 |          |       |     |                  |         |
| cg22980079 | 4  | 2,627,118   | 1.62E-13 | 0.229 | 0.205 | 3.09E-19 | 0.184 |     | <i>FAM193A</i>   | TSS200  |
| cg00976949 | 3  | 127,950,782 | 4E-20    | 0.229 | 0.208 |          |       |     | <i>EEFSEC</i>    | Body    |
| cg01231108 | 2  | 155,556,016 | 0.000263 | 0.229 | 0.232 |          |       |     | <i>KCNJ3</i>     | Body    |
| cg27656658 | 17 | 46,628,224  | 3.49E-07 | 0.229 | 0.220 |          |       |     | <i>HOXB3</i>     | Body    |
| cg12105183 | 1  | 89,829,876  | 4.4E-21  | 0.229 | 0.231 |          |       |     | <i>GBP6</i>      | 5'UTR   |
| cg13623495 | 6  | 10,426,099  | 1.96E-05 | 0.229 | 0.221 |          |       |     |                  |         |
| cg14508021 | 15 | 85,987,419  | 1.22E-07 | 0.229 | 0.205 |          |       |     | <i>AKAP13</i>    | 5'UTR   |
| cg08607018 | 19 | 31,842,873  | 2.46E-05 | 0.229 | 0.214 |          |       |     |                  |         |
| cg02064360 | 2  | 219,854,101 | 7.25E-06 | 0.229 | 0.226 |          |       | Yes |                  |         |
| cg10454327 | 16 | 85,204,789  | 5.4E-18  | 0.229 | 0.241 |          |       |     |                  |         |
| cg20597172 | 1  | 246,646,424 | 2.28E-08 | 0.229 | 0.212 |          |       |     | <i>SMYD3</i>     | Body    |
| cg00203568 | X  | 135,850,876 | 2.15E-08 | 0.229 | 0.221 |          |       |     | <i>ARHGEF6</i>   | Body    |
| cg11280525 | 5  | 87,955,695  | 0.000273 | 0.229 | 0.253 |          |       |     | <i>LOC645323</i> | Body    |
| cg20890989 | 2  | 223,574,238 | 0.000409 | 0.229 | 0.237 |          |       |     | <i>MOGAT1</i>    | Body    |
| cg04055345 | 10 | 116,264,862 | 7.83E-10 | 0.229 | 0.237 |          |       |     | <i>ABLIM1</i>    | Body    |
| cg00036976 | 16 | 85,343,281  | 9.24E-19 | 0.229 | 0.219 |          |       |     |                  |         |
| cg01222180 | X  | 150,345,616 | 0.008629 | 0.229 | 0.227 |          |       |     | <i>GPR50</i>     | Body    |
| cg04729730 | 11 | 69,258,477  | 0.022031 | 0.229 | 0.107 |          |       |     |                  |         |
| cg23856138 | 10 | 35,658,321  | 0.001297 | 0.229 | 0.218 |          |       |     | <i>CCNY</i>      | Body    |
| cg26307117 | 3  | 46,506,552  | 0.000135 | 0.229 | 0.177 |          |       |     | <i>LTF</i>       | TSS200  |
| cg02456406 | 19 | 36,288,702  | 0.000984 | 0.229 | 0.265 |          |       |     |                  |         |
| cg00687306 | 15 | 37,398,943  | 0.01723  | 0.229 | 0.258 |          |       |     |                  |         |
| cg02438164 | 16 | 4,651,732   | 0.000121 | 0.229 | 0.264 |          |       |     |                  |         |
| cg13530507 | X  | 54,833,796  | 1.21E-07 | 0.229 | 0.224 |          |       |     | <i>MAGED2</i>    | TSS1500 |

|            |    |             |          |       |       |            |       |  |                 |         |
|------------|----|-------------|----------|-------|-------|------------|-------|--|-----------------|---------|
| cg07776049 | 2  | 928,870     | 1.15E-05 | 0.229 | 0.219 |            |       |  |                 |         |
| cg13030582 | 17 | 19,290,708  | 4.9E-20  | 0.229 | 0.221 | 7.68E-16   | 0.117 |  | <i>MFAP4</i>    | TSS1500 |
| cg25125298 | 5  | 71,853,215  | 3E-09    | 0.229 | 0.202 |            |       |  |                 |         |
| cg27413563 | 7  | 95,026,090  | 1.01E-05 | 0.229 | 0.219 |            |       |  | <i>PON3</i>     | TSS1500 |
| cg01096199 | 14 | 90,191,045  | 0.005823 | 0.229 | 0.174 |            |       |  |                 |         |
| cg04805577 | 7  | 27,286,684  | 7.28E-10 | 0.229 | 0.199 |            |       |  |                 |         |
| cg13737332 | 10 | 100,993,583 | 0.004658 | 0.229 | 0.297 |            |       |  | <i>HPSE2</i>    | Body    |
| cg27450668 | 1  | 3,460,070   | 0.005702 | 0.229 | 0.186 |            |       |  | <i>MEGF6</i>    | Body    |
| cg01427769 | 6  | 31,830,600  | 0.045091 | 0.229 | 0.223 |            |       |  | <i>NEU1</i>     | 5'UTR   |
| cg01212071 | 2  | 122,041,650 | 2.13E-08 | 0.229 | 0.214 |            |       |  | <i>TFCP2L1</i>  | Body    |
| cg00194519 | X  | 133,679,545 | 0.00132  | 0.229 | 0.235 |            |       |  | <i>MGC16121</i> | Body    |
| cg19134347 | 14 | 104,584,279 | 1.95E-09 | 0.229 | 0.217 |            |       |  |                 |         |
| cg00077904 | 5  | 151,078,909 | 6.49E-11 | 0.229 | 0.219 |            |       |  |                 |         |
| cg10303107 | 11 | 45,230,795  | 1.3E-62  | 0.229 | 0.212 |            |       |  | <i>PRDM11</i>   | Body    |
| cg16160493 | 14 | 89,837,519  | 2.46E-14 | 0.229 | 0.220 |            |       |  | <i>FOXN3</i>    | Body    |
| cg26266041 | 14 | 88,852,686  | 0.003748 | 0.229 | 0.103 |            |       |  | <i>SPATA7</i>   | Body    |
| cg03572011 | 17 | 43,229,244  | 7.31E-06 | 0.229 | 0.249 |            |       |  | <i>HEXIM1</i>   | 1stExon |
| cg13743231 | 10 | 94,958,683  | 0.031464 | 0.229 | 0.155 |            |       |  |                 |         |
| cg04340435 | 13 | 114,145,973 | 0.000513 | 0.229 | 0.183 |            |       |  | <i>TMCO3</i>    | 5'UTR   |
| cg04202892 | 2  | 111,875,749 | 4.49E-05 | 0.229 | 0.236 |            |       |  | <i>ACOXL</i>    | 3'UTR   |
| cg09104660 | 12 | 57,635,479  | 6.96E-10 | 0.229 | 0.196 |            |       |  | <i>NDUFA4L2</i> | TSS1500 |
| cg12600692 | 2  | 198,809,390 | 0.000431 | 0.229 | 0.217 |            |       |  | <i>PLCL1</i>    | Body    |
| cg23015118 | 1  | 2,232,527   | 0.000207 | 0.229 | 0.218 |            |       |  | <i>SKI</i>      | Body    |
| cg09792881 | 1  | 50,884,544  | 0.011597 | 0.229 | 0.283 |            |       |  | <i>DMRTA2</i>   | Body    |
| cg18178715 | 1  | 43,795,999  | 0.000325 | 0.229 | 0.246 |            |       |  |                 |         |
| cg06124975 | 6  | 107,810,578 | 0.003071 | 0.229 | 0.118 |            |       |  | <i>SOBP</i>     | TSS1500 |
| cg01938018 | 1  | 179,545,425 | 0.000105 | 0.229 | 0.196 |            |       |  | <i>NPHS2</i>    | TSS1500 |
| cg04478428 | 20 | 61,584,072  | 1.21E-07 | 0.229 | 0.225 |            |       |  | <i>SLC17A9</i>  | 1stExon |
| cg08162976 | 2  | 67,032,496  | 2.9E-08  | 0.229 | 0.183 |            |       |  |                 |         |
| cg09606564 | 17 | 19,290,353  | 1.4E-08  | 0.229 | 0.253 | 0.00000792 | 0.094 |  | <i>MFAP4</i>    | Body    |
| cg07963345 | 22 | 39,436,852  | 5.96E-07 | 0.229 | 0.207 |            |       |  | <i>APOBEC3F</i> | 1stExon |
| cg22158992 | 5  | 1,021,831   | 3.59E-13 | 0.229 | 0.202 |            |       |  | <i>NKD2</i>     | Body    |
| cg26777836 | 3  | 26,665,815  | 0.039539 | 0.229 | 0.095 |            |       |  | <i>LRR3B</i>    | 5'UTR   |
| cg13067221 | 14 | 23,449,582  | 7.35E-05 | 0.229 | 0.236 |            |       |  | <i>JUB</i>      | Body    |

|            |    |             |          |       |       |           |       |  |                 |         |
|------------|----|-------------|----------|-------|-------|-----------|-------|--|-----------------|---------|
| cg23636571 | 6  | 32,828,996  | 0.024047 | 0.229 | 0.167 |           |       |  |                 |         |
| cg26668276 | 7  | 96,633,311  | 0.011544 | 0.229 | 0.270 |           |       |  | <i>DLX6AS</i>   | Body    |
| cg02773756 | 6  | 27,799,308  | 0.001212 | 0.229 | 0.186 |           |       |  | <i>HIST1H4K</i> | TSS200  |
| cg15406469 | 11 | 35,546,824  | 6.23E-05 | 0.229 | 0.204 |           |       |  | <i>PAMR1</i>    | Body    |
| cg16134717 | 1  | 11,752,494  | 0.001065 | 0.229 | 0.238 |           |       |  | <i>MAD2L2</i>   | TSS1500 |
| cg20325547 | 1  | 9,431,594   | 2.93E-12 | 0.229 | 0.223 |           |       |  |                 |         |
| cg18614381 | 19 | 31,844,182  | 5.03E-07 | 0.229 | 0.211 |           |       |  |                 |         |
| cg27246147 | 17 | 47,987,056  | 0.00025  | 0.229 | 0.246 |           |       |  |                 |         |
| cg00801512 | 17 | 28,996,047  | 7.53E-06 | 0.229 | 0.283 |           |       |  |                 |         |
| cg08355659 | 12 | 54,399,190  | 2.62E-10 | 0.229 | 0.196 |           |       |  |                 |         |
| cg12061886 | 14 | 75,746,793  | 4.03E-09 | 0.229 | 0.204 |           |       |  | <i>FOS</i>      | Body    |
| cg21046160 | 22 | 24,105,147  | 0.001913 | 0.229 | 0.149 |           |       |  | <i>C22orf15</i> | TSS200  |
| cg04105091 | 6  | 32,121,355  | 0.000708 | 0.229 | 0.235 |           |       |  | <i>PPT2</i>     | TSS1500 |
| cg07197785 | 1  | 111,813,690 | 0.000877 | 0.229 | 0.282 |           |       |  |                 |         |
| cg25706257 | 1  | 6,390,530   | 8.78E-23 | 0.229 | 0.209 |           |       |  | <i>ACOT7</i>    | Body    |
| cg06558014 | 6  | 100,051,116 | 0.045262 | 0.229 | 0.371 |           |       |  |                 |         |
| cg08910558 | 15 | 75,471,194  | 4.26E-05 | 0.229 | 0.229 |           |       |  |                 |         |
| cg13382288 | 1  | 202,614,046 | 3.58E-07 | 0.229 | 0.215 |           |       |  | <i>SYT2</i>     | TSS1500 |
| cg15852963 | 3  | 181,440,178 | 1.29E-05 | 0.229 | 0.211 |           |       |  | <i>SOX2OT</i>   | Body    |
| cg26575450 | 2  | 64,834,280  | 0.000854 | 0.229 | 0.213 |           |       |  |                 |         |
| cg00178119 | 8  | 105,235,184 | 9.66E-07 | 0.229 | 0.217 |           |       |  | <i>RIMS2</i>    | Body    |
| cg07910680 | 18 | 56,296,449  | 1.21E-15 | 0.229 | 0.216 |           |       |  | <i>ALPK2</i>    | TSS1500 |
| cg01084154 | 1  | 20,692,892  | 0.020133 | 0.229 | 0.303 |           |       |  |                 |         |
| cg09731996 | 5  | 3,599,090   | 0.00368  | 0.229 | 0.265 |           |       |  | <i>IRX1</i>     | Body    |
| cg16601359 | 12 | 2,955,294   | 1.12E-13 | 0.229 | 0.228 |           |       |  |                 |         |
| cg04074153 | 12 | 29,568,207  | 0.00076  | 0.229 | 0.287 |           |       |  |                 |         |
| cg21357996 | 20 | 33,578,276  | 6.43E-17 | 0.229 | 0.225 |           |       |  | <i>MYH7B</i>    | Body    |
| cg21784254 | 13 | 108,922,428 | 8.97E-06 | 0.229 | 0.218 |           |       |  | <i>TNFSF13B</i> | 1stExon |
| cg01289103 | 17 | 38,821,277  | 0.029216 | 0.229 | 0.232 | 0.0000128 | 0.114 |  | <i>KRT222</i>   | 1stExon |
| cg10780949 | 15 | 67,418,316  | 0.000375 | 0.229 | 0.166 |           |       |  | <i>SMAD3</i>    | Body    |
| cg11028052 | 15 | 81,154,387  | 7.81E-10 | 0.229 | 0.232 |           |       |  | <i>KIAA1199</i> | 5'UTR   |
| cg07417284 | 17 | 1,082,225   | 1.57E-05 | 0.229 | 0.196 |           |       |  | <i>ABR</i>      | Body    |
| cg13045555 | 8  | 105,342,365 | 1.53E-10 | 0.229 | 0.216 |           |       |  |                 |         |
| cg17032005 | 1  | 92,891,301  | 3.98E-14 | 0.229 | 0.236 |           |       |  |                 |         |

|            |    |             |          |       |       |  |  |  |                 |         |
|------------|----|-------------|----------|-------|-------|--|--|--|-----------------|---------|
| cg17172851 | 1  | 18,957,328  | 0.002991 | 0.229 | 0.244 |  |  |  | <i>PAX7</i>     | TSS200  |
| cg24848787 | 15 | 58,844,359  | 3.59E-06 | 0.229 | 0.195 |  |  |  | <i>LIPC</i>     | Body    |
| cg27485596 | 13 | 111,829,530 | 1.44E-09 | 0.229 | 0.223 |  |  |  | <i>ARHGEF7</i>  | Body    |
| cg16999370 | 4  | 122,302,232 | 0.030095 | 0.229 | 0.224 |  |  |  | <i>QRFPR</i>    | TSS200  |
| cg08072507 | 7  | 133,897,858 | 6.88E-07 | 0.229 | 0.199 |  |  |  | <i>LRGUK</i>    | Body    |
| cg24213719 | 18 | 60,263,646  | 0.015375 | 0.229 | 0.201 |  |  |  |                 |         |
| cg00162969 | 12 | 132,933,532 | 0.013749 | 0.229 | 0.299 |  |  |  |                 |         |
| cg00702126 | 1  | 1,369,793   | 0.01489  | 0.229 | 0.142 |  |  |  | <i>VWA1</i>     | TSS1500 |
| cg04995300 | 3  | 66,848,608  | 0.00015  | 0.229 | 0.250 |  |  |  |                 |         |
| cg06017212 | 17 | 1,478,463   | 2.53E-12 | 0.228 | 0.215 |  |  |  | <i>SLC43A2</i>  | 3'UTR   |
| cg27176614 | 16 | 88,717,989  | 2.13E-11 | 0.228 | 0.227 |  |  |  | <i>CYBA</i>     | TSS1500 |
| cg26421310 | 1  | 25,257,058  | 0.005799 | 0.228 | 0.189 |  |  |  | <i>RUNX3</i>    | TSS1500 |
| cg13341668 | 3  | 50,359,909  | 9.12E-14 | 0.228 | 0.247 |  |  |  | <i>HYAL2</i>    | 5'UTR   |
| cg15976388 | 1  | 114,696,946 | 0.011963 | 0.228 | 0.266 |  |  |  | <i>SYT6</i>     | TSS1500 |
| cg17533927 | 7  | 128,550,898 | 3.11E-18 | 0.228 | 0.203 |  |  |  | <i>KCP</i>      | TSS200  |
| cg02582057 | 7  | 155,258,253 | 0.011712 | 0.228 | 0.206 |  |  |  |                 |         |
| cg11993173 | 8  | 54,857,695  | 2.97E-05 | 0.228 | 0.262 |  |  |  | <i>RGS20</i>    | Body    |
| cg17069396 | 20 | 2,731,102   | 4.75E-09 | 0.228 | 0.209 |  |  |  | <i>EBF4</i>     | Body    |
| cg15603311 | 3  | 54,157,900  | 0.006877 | 0.228 | 0.221 |  |  |  | <i>CACNA2D3</i> | Body    |
| cg03804255 | 12 | 90,278,335  | 8.55E-07 | 0.228 | 0.223 |  |  |  |                 |         |
| cg09260773 | 1  | 119,529,266 | 0.003687 | 0.228 | 0.310 |  |  |  | <i>TBX15</i>    | 5'UTR   |
| cg22101190 | 17 | 77,896,096  | 0.001152 | 0.228 | 0.189 |  |  |  |                 |         |
| cg04143876 | 15 | 76,639,558  | 0.000452 | 0.228 | 0.131 |  |  |  |                 |         |
| cg08818092 | X  | 24,665,074  | 0.048632 | 0.228 | 0.184 |  |  |  | <i>PCYT1B</i>   | Body    |
| cg10499651 | 3  | 12,465,415  | 0.004479 | 0.228 | 0.177 |  |  |  | <i>PPARG</i>    | Body    |
| cg03230711 | 2  | 45,228,334  | 2.92E-10 | 0.228 | 0.251 |  |  |  |                 |         |
| cg11620672 | 6  | 19,298,476  | 1.2E-14  | 0.228 | 0.225 |  |  |  |                 |         |
| cg07010228 | 19 | 2,253,854   | 1.17E-07 | 0.228 | 0.214 |  |  |  | <i>JSRP1</i>    | Body    |
| cg08662620 | 10 | 34,061,705  | 8.7E-07  | 0.228 | 0.233 |  |  |  |                 |         |
| cg14780466 | 2  | 20,870,812  | 3.53E-10 | 0.228 | 0.216 |  |  |  | <i>GDF7</i>     | Body    |
| cg20779964 | 20 | 54,580,070  | 6.53E-12 | 0.228 | 0.210 |  |  |  | <i>CBLN4</i>    | TSS200  |
| cg18496447 | 15 | 45,480,917  | 0.019099 | 0.228 | 0.126 |  |  |  | <i>SHF</i>      | Body    |
| cg25910519 | 7  | 157,389,729 | 1.24E-17 | 0.228 | 0.220 |  |  |  | <i>PTPRN2</i>   | Body    |
| cg06948492 | 19 | 34,398,264  | 4.87E-07 | 0.228 | 0.226 |  |  |  |                 |         |



|            |    |             |          |       |       |          |       |  |                |         |
|------------|----|-------------|----------|-------|-------|----------|-------|--|----------------|---------|
| cg15843262 | 2  | 25,473,895  | 1.8E-06  | 0.228 | 0.223 |          |       |  | <i>DNMT3A</i>  | Body    |
| cg16198103 | 8  | 53,471,884  | 9.78E-09 | 0.228 | 0.209 |          |       |  | <i>FAM150A</i> | Body    |
| cg06159404 | 10 | 43,846,376  | 0.01462  | 0.228 | 0.136 |          |       |  |                |         |
| cg26006870 | 8  | 11,559,039  | 1.71E-06 | 0.228 | 0.239 |          |       |  |                |         |
| cg01942962 | 4  | 158,143,439 | 0.03986  | 0.228 | 0.167 |          |       |  | <i>GRIA2</i>   | Body    |
| cg00953480 | 9  | 37,034,933  | 0.043273 | 0.228 | 0.377 |          |       |  | <i>PAX5</i>    | TSS1500 |
| cg25929173 | 2  | 182,548,308 | 0.038767 | 0.228 | 0.049 |          |       |  |                |         |
| cg08290668 | 16 | 876,164     | 1.41E-07 | 0.228 | 0.197 |          |       |  |                |         |
| cg10130564 | 11 | 117,069,849 | 4.28E-13 | 0.228 | 0.225 |          |       |  | <i>TAGLN</i>   | TSS200  |
| cg24399204 | 2  | 11,636,294  | 2.69E-07 | 0.228 | 0.191 |          |       |  |                |         |
| cg04633683 | 16 | 29,837,056  | 2.05E-06 | 0.228 | 0.229 |          |       |  | <i>MVP</i>     | 5'UTR   |
| cg07942135 | 7  | 27,154,262  | 0.000327 | 0.228 | 0.203 |          |       |  | <i>HOXA3</i>   | 5'UTR   |
| cg27262850 | 18 | 74,826,769  | 3.47E-07 | 0.228 | 0.214 |          |       |  | <i>MBP</i>     | 5'UTR   |
| cg05053978 | 6  | 117,869,098 | 1.69E-05 | 0.228 | 0.221 |          |       |  | <i>DCBLD1</i>  | Body    |
| cg03795847 | 3  | 44,596,512  | 5.1E-05  | 0.228 | 0.157 |          |       |  | <i>ZNF167</i>  | TSS200  |
| cg13344095 | 6  | 26,233,352  | 0.014963 | 0.228 | 0.216 |          |       |  |                |         |
| cg00761125 | 12 | 96,590,115  | 1.54E-07 | 0.228 | 0.228 |          |       |  | <i>ELK3</i>    | 5'UTR   |
| cg26522361 | 5  | 55,625,247  | 2.68E-10 | 0.228 | 0.209 |          |       |  |                |         |
| cg05673882 | 5  | 74,862,702  | 0.000165 | 0.228 | 0.210 |          |       |  | <i>POLK</i>    | Body    |
| cg10397440 | 8  | 57,359,258  | 5.28E-05 | 0.228 | 0.253 |          |       |  | <i>PENK</i>    | TSS1500 |
| cg17046823 | 17 | 16,256,992  | 0.006156 | 0.228 | 0.143 |          |       |  | <i>CENPV</i>   | TSS200  |
| cg18722841 | 11 | 71,954,982  | 0.000579 | 0.228 | 0.277 | 4.24E-08 | 0.163 |  | <i>PHOX2A</i>  | 1stExon |
| cg01547915 | 2  | 38,947,762  | 0.00189  | 0.228 | 0.243 |          |       |  | <i>GALM</i>    | Body    |
| cg06191390 | 2  | 73,299,285  | 7.36E-06 | 0.228 | 0.175 |          |       |  | <i>SFXN5</i>   | TSS1500 |
| cg26395761 | 7  | 107,700,124 | 2.08E-11 | 0.228 | 0.220 |          |       |  | <i>LAMB4</i>   | Body    |
| cg02329430 | 15 | 73,921,385  | 1.37E-23 | 0.228 | 0.215 |          |       |  | <i>NPTN</i>    | Body    |
| cg09090017 | 15 | 23,158,623  | 0.000279 | 0.228 | 0.241 |          |       |  |                |         |
| cg22729539 | 12 | 122,519,119 | 2.36E-07 | 0.228 | 0.226 |          |       |  | <i>MLXIP</i>   | Body    |
| cg08832414 | 3  | 183,993,571 | 6.3E-10  | 0.228 | 0.191 |          |       |  | <i>ECE2</i>    | Body    |
| cg12854483 | 19 | 11,649,671  | 7.68E-07 | 0.228 | 0.234 | 6.84E-28 | 0.211 |  | <i>CNN1</i>    | 1stExon |
| cg23733328 | X  | 53,311,101  | 6.46E-06 | 0.228 | 0.242 |          |       |  | <i>IQSEC2</i>  | Body    |
| cg22494858 | 1  | 110,611,712 | 3.71E-06 | 0.228 | 0.228 |          |       |  | <i>ALX3</i>    | Body    |
| cg06201393 | 3  | 169,378,835 | 2.55E-05 | 0.228 | 0.216 |          |       |  | <i>MECOM</i>   | Body    |
| cg09553651 | 15 | 60,411,555  | 0.004838 | 0.228 | 0.185 |          |       |  |                |         |

|            |    |             |          |       |       |          |       |  |                 |         |
|------------|----|-------------|----------|-------|-------|----------|-------|--|-----------------|---------|
| cg26346108 | 19 | 35,329,641  | 0.001035 | 0.228 | 0.262 |          |       |  |                 |         |
| cg07355926 | 19 | 1,852,127   | 9.28E-06 | 0.228 | 0.210 |          |       |  |                 |         |
| cg09473576 | 1  | 20,813,647  | 0.033153 | 0.228 | 0.092 |          |       |  | <i>CAMK2N1</i>  | TSS1500 |
| cg05230392 | 17 | 55,976,522  | 0.000262 | 0.228 | 0.279 |          |       |  | <i>CUEDC1</i>   | 5'UTR   |
| cg10546817 | 14 | 95,233,855  | 1.99E-06 | 0.228 | 0.207 |          |       |  |                 |         |
| cg06710259 | 5  | 55,775,841  | 8.81E-12 | 0.228 | 0.214 |          |       |  |                 |         |
| cg14376625 | 12 | 111,736,686 | 2.36E-08 | 0.228 | 0.246 |          |       |  | <i>CUX2</i>     | Body    |
| cg14886572 | 17 | 40,934,398  | 0.045292 | 0.228 | 0.075 |          |       |  | <i>WNK4</i>     | Body    |
| cg16585333 | 1  | 223,302,861 | 0.004751 | 0.228 | 0.236 |          |       |  | <i>TLR5</i>     | 5'UTR   |
| cg25670685 | 13 | 102,068,432 | 0.008936 | 0.228 | 0.129 |          |       |  | <i>NALCN</i>    | 5'UTR   |
| cg08430329 | 2  | 73,430,374  | 0.015133 | 0.228 | 0.264 |          |       |  | <i>NOTO</i>     | Body    |
| cg10902144 | 3  | 28,618,700  | 2.81E-06 | 0.228 | 0.162 |          |       |  |                 |         |
| cg13900817 | 5  | 172,070,153 | 1.55E-05 | 0.228 | 0.219 |          |       |  | <i>NEURL1B</i>  | Body    |
| cg02852670 | 14 | 20,903,410  | 1.1E-11  | 0.228 | 0.257 |          |       |  | <i>KLHL33</i>   | 5'UTR   |
| cg19659741 | 8  | 39,172,099  | 9.86E-05 | 0.228 | 0.246 |          |       |  | <i>ADAM5P</i>   | TSS200  |
| cg27343917 | 2  | 75,751,211  | 5.8E-05  | 0.228 | 0.244 |          |       |  | <i>FAM176A</i>  | 5'UTR   |
| cg27638453 | 6  | 157,470,150 | 6.59E-06 | 0.228 | 0.217 |          |       |  | <i>ARID1B</i>   | Body    |
| cg02246426 | 8  | 97,162,431  | 0.000361 | 0.228 | 0.216 |          |       |  | <i>GDF6</i>     | Body    |
| cg18358869 | 10 | 102,808,077 | 1.12E-10 | 0.228 | 0.217 |          |       |  |                 |         |
| cg19317211 | 20 | 2,801,711   | 0.002439 | 0.228 | 0.270 |          |       |  |                 |         |
| cg05771342 | 11 | 68,782,202  | 6.02E-09 | 0.228 | 0.221 |          |       |  | <i>MRGPRF</i>   | TSS1500 |
| cg15282819 | 16 | 12,997,592  | 0.016989 | 0.228 | 0.257 |          |       |  | <i>SHISA9</i>   | Body    |
| cg24366665 | 13 | 31,371,618  | 0.002529 | 0.228 | 0.200 |          |       |  |                 |         |
| cg00395063 | 11 | 120,210,293 | 6.95E-07 | 0.228 | 0.227 |          |       |  | <i>ARHGEF12</i> | Body    |
| cg05033803 | 6  | 27,182,976  | 0.017349 | 0.228 | 0.315 |          |       |  |                 |         |
| cg05619598 | 19 | 33,569,228  | 3.06E-05 | 0.228 | 0.229 |          |       |  |                 |         |
| cg07802949 | 8  | 1,404,980   | 1.98E-07 | 0.228 | 0.192 |          |       |  |                 |         |
| cg10333214 | 16 | 1,382,952   | 0.00011  | 0.228 | 0.203 |          |       |  |                 |         |
| cg25444386 | 4  | 55,990,944  | 3.89E-10 | 0.228 | 0.237 |          |       |  | <i>KDR</i>      | Body    |
| cg10205310 | 12 | 117,131,820 | 9.62E-14 | 0.228 | 0.181 |          |       |  |                 |         |
| cg08914623 | 11 | 44,327,572  | 2.2E-06  | 0.228 | 0.252 | 4.03E-23 | 0.211 |  | <i>ALX4</i>     | Body    |
| cg13598256 | 5  | 140,801,286 | 0.00286  | 0.228 | 0.277 |          |       |  | <i>PCDHGA4</i>  | Body    |
| cg15927196 | 7  | 95,025,905  | 1.68E-05 | 0.228 | 0.199 |          |       |  | <i>PON3</i>     | TSS1500 |
| cg21413219 | 1  | 6,299,374   | 9.12E-05 | 0.228 | 0.275 |          |       |  |                 |         |

|            |    |             |          |       |       |          |       |  |                  |         |
|------------|----|-------------|----------|-------|-------|----------|-------|--|------------------|---------|
| cg15081720 | 1  | 119,866,618 | 2.34E-16 | 0.228 | 0.217 |          |       |  |                  |         |
| cg15895925 | 1  | 33,810,859  | 1.6E-18  | 0.228 | 0.240 |          |       |  | <i>PHC2</i>      | 5'UTR   |
| cg02854922 | 1  | 144,930,964 | 2.57E-06 | 0.228 | 0.135 |          |       |  | <i>PDE4DIP</i>   | 1stExon |
| cg11581248 | 1  | 9,887,811   | 2.24E-14 | 0.228 | 0.222 |          |       |  |                  |         |
| cg12067764 | 1  | 153,762,244 | 0.002352 | 0.228 | 0.176 |          |       |  |                  |         |
| cg21506800 | 19 | 11,531,519  | 9.37E-05 | 0.228 | 0.235 |          |       |  | <i>CCDC151</i>   | Body    |
| cg22663872 | 7  | 149,120,266 | 0.000137 | 0.228 | 0.231 |          |       |  |                  |         |
| cg03391657 | 1  | 121,260,690 | 0.000616 | 0.228 | 0.095 |          |       |  | <i>LOC647121</i> | TSS1500 |
| cg11721464 | 19 | 42,703,763  | 6.62E-09 | 0.228 | 0.202 |          |       |  | <i>DEDD2</i>     | Body    |
| cg14270581 | 14 | 103,394,548 | 6.59E-09 | 0.228 | 0.204 |          |       |  | <i>AMN</i>       | Body    |
| cg06759189 | 17 | 77,777,947  | 0.021966 | 0.228 | 0.187 |          |       |  |                  |         |
| cg01691710 | 8  | 49,292,285  | 3.67E-11 | 0.228 | 0.201 |          |       |  |                  |         |
| cg02168584 | 2  | 172,972,681 | 0.001664 | 0.228 | 0.222 |          |       |  |                  |         |
| cg04431143 | 3  | 37,986,017  | 2.47E-05 | 0.228 | 0.240 |          |       |  | <i>CTDSPL</i>    | Body    |
| cg17173187 | 15 | 85,201,210  | 0.0256   | 0.228 | 0.202 |          |       |  | <i>NMB</i>       | Body    |
| cg19547972 | 7  | 73,389,575  | 8.18E-09 | 0.228 | 0.231 |          |       |  |                  |         |
| cg26818573 | 2  | 46,717,839  | 2.57E-09 | 0.228 | 0.227 |          |       |  |                  |         |
| cg17964510 | 2  | 175,199,694 | 0.033455 | 0.228 | 0.279 |          |       |  | <i>SP9</i>       | TSS200  |
| cg00767496 | 15 | 45,671,279  | 7.47E-06 | 0.228 | 0.223 |          |       |  | <i>LOC145663</i> | Body    |
| cg01043845 | 2  | 177,013,071 | 6.34E-06 | 0.228 | 0.187 |          |       |  |                  |         |
| cg14377594 | 9  | 1,051,505   | 9.8E-08  | 0.228 | 0.198 |          |       |  | <i>DMRT2</i>     | 5'UTR   |
| cg04335355 | X  | 44,204,116  | 1.27E-05 | 0.228 | 0.218 |          |       |  | <i>EFHC2</i>     | TSS1500 |
| cg21858380 | 2  | 119,916,486 | 0.002981 | 0.228 | 0.230 |          |       |  | <i>C1QL2</i>     | TSS200  |
| cg01815538 | 6  | 100,054,615 | 5.46E-05 | 0.228 | 0.148 |          |       |  | <i>PRDM13</i>    | TSS200  |
| cg02718825 | 20 | 55,202,842  | 2.9E-07  | 0.228 | 0.219 |          |       |  |                  |         |
| cg02801786 | 12 | 113,914,222 | 0.005787 | 0.228 | 0.254 |          |       |  |                  |         |
| cg16552454 | 20 | 61,583,924  | 5.16E-09 | 0.228 | 0.222 |          |       |  | <i>SLC17A9</i>   | TSS200  |
| cg03233918 | 4  | 84,991,657  | 0.031789 | 0.228 | 0.254 |          |       |  |                  |         |
| cg06118312 | 5  | 54,398,555  | 0.000808 | 0.228 | 0.242 | 1.18E-13 | 0.217 |  | <i>GZMA</i>      | 1stExon |
| cg08529345 | 16 | 54,971,700  | 0.002593 | 0.228 | 0.249 |          |       |  |                  |         |
| cg22254983 | 8  | 136,181,389 | 0.049822 | 0.228 | 0.323 |          |       |  |                  |         |
| cg07227671 | 12 | 124,780,924 | 0.011683 | 0.228 | 0.282 |          |       |  | <i>FAM101A</i>   | 5'UTR   |
| cg01944288 | 9  | 135,036,217 | 1.26E-09 | 0.228 | 0.237 |          |       |  | <i>NTNG2</i>     | TSS1500 |
| cg11652668 | 18 | 13,136,899  | 0.007275 | 0.228 | 0.069 |          |       |  |                  |         |

|            |    |             |          |       |       |          |       |  |                 |         |
|------------|----|-------------|----------|-------|-------|----------|-------|--|-----------------|---------|
| cg13929328 | 10 | 129,535,898 | 4.22E-07 | 0.228 | 0.173 | 5.15E-23 | 0.207 |  | <i>FOXI2</i>    | 1stExon |
| cg15438548 | 10 | 123,098,791 | 1.31E-11 | 0.228 | 0.213 |          |       |  |                 |         |
| cg22751954 | 6  | 143,023,932 | 2.55E-13 | 0.228 | 0.214 |          |       |  |                 |         |
| cg26525121 | 6  | 14,129,370  | 3.36E-17 | 0.228 | 0.218 |          |       |  | <i>CD83</i>     | Body    |
| cg26860613 | 12 | 6,661,647   | 2.18E-13 | 0.228 | 0.221 |          |       |  | <i>IFFO1</i>    | Body    |
| cg10885338 | 2  | 106,682,640 | 2.51E-06 | 0.228 | 0.206 | 5.67E-09 | 0.089 |  | <i>C2orf40</i>  | Body    |
| cg24116965 | 4  | 148,654,701 | 2.63E-08 | 0.228 | 0.207 |          |       |  | <i>ARHGAP10</i> | Body    |
| cg01323049 | 2  | 19,557,396  | 2.97E-05 | 0.228 | 0.187 |          |       |  | <i>OSR1</i>     | 5'UTR   |
| cg09314702 | 12 | 76,271,607  | 3.81E-09 | 0.228 | 0.223 |          |       |  |                 |         |
| cg03946671 | 20 | 62,693,973  | 4.6E-13  | 0.228 | 0.233 |          |       |  | <i>TCEA2</i>    | TSS200  |
| cg04754011 | 11 | 60,623,144  | 7.58E-09 | 0.228 | 0.216 | 1.78E-20 | 0.101 |  | <i>GPR44</i>    | 5'UTR   |
| cg06772671 | 16 | 85,123,778  | 8.35E-18 | 0.228 | 0.220 |          |       |  | <i>KIAA0513</i> | 3'UTR   |
| cg15506703 | 2  | 242,844,601 | 0.01847  | 0.228 | 0.185 |          |       |  |                 |         |
| cg18249173 | 7  | 35,293,245  | 0.007369 | 0.228 | 0.244 |          |       |  | <i>TBX20</i>    | 1stExon |
| cg23319982 | 19 | 41,641,847  | 0.000194 | 0.228 | 0.224 |          |       |  |                 |         |
| cg06829760 | 2  | 16,845,412  | 9.5E-08  | 0.228 | 0.246 |          |       |  | <i>FAM49A</i>   | 5'UTR   |
| cg10066186 | 14 | 23,083,160  | 7.09E-13 | 0.228 | 0.235 |          |       |  |                 |         |
| cg11410682 | 19 | 46,999,224  | 0.001727 | 0.228 | 0.279 |          |       |  | <i>PNMAL2</i>   | TSS200  |
| cg12999932 | 3  | 177,412,249 | 3.98E-09 | 0.228 | 0.234 |          |       |  |                 |         |
| cg17818471 | 2  | 177,012,640 | 6.33E-07 | 0.228 | 0.174 |          |       |  |                 |         |
| cg07016258 | 15 | 83,953,929  | 3.54E-06 | 0.228 | 0.243 |          |       |  | <i>BNC1</i>     | TSS1500 |
| cg14799457 | 18 | 19,927,125  | 0.026323 | 0.228 | 0.149 |          |       |  |                 |         |
| cg03982087 | 18 | 9,708,920   | 0.044965 | 0.228 | 0.110 |          |       |  | <i>RAB31</i>    | Body    |
| cg06108459 | 6  | 43,089,049  | 4.99E-10 | 0.228 | 0.225 |          |       |  | <i>PTK7</i>     | Body    |
| cg22459204 | 5  | 10,565,940  | 1.75E-07 | 0.228 | 0.221 |          |       |  | <i>ANKRD33B</i> | Body    |
| cg10362172 | 3  | 138,679,578 | 0.001971 | 0.228 | 0.252 |          |       |  |                 |         |
| cg14252141 | 6  | 1,388,159   | 1.89E-06 | 0.228 | 0.172 |          |       |  |                 |         |
| cg20387775 | 6  | 158,136,705 | 3.14E-13 | 0.228 | 0.233 |          |       |  |                 |         |
| cg05670461 | 3  | 157,155,088 | 8.69E-05 | 0.228 | 0.208 |          |       |  | <i>VEPH1</i>    | Body    |
| cg16858415 | 11 | 116,967,348 | 8.45E-06 | 0.228 | 0.233 |          |       |  | <i>SIK3</i>     | Body    |
| cg01387771 | 16 | 1,036,944   | 0.002425 | 0.228 | 0.228 |          |       |  | <i>SOX8</i>     | 3'UTR   |
| cg11944284 | 11 | 2,904,663   | 2.87E-15 | 0.228 | 0.208 |          |       |  | <i>CDKN1C</i>   | 3'UTR   |
| cg05488474 | 12 | 54,388,934  | 0.0021   | 0.228 | 0.174 |          |       |  |                 |         |
| cg05826677 | 7  | 48,031,468  | 0.013686 | 0.228 | 0.271 |          |       |  | <i>SUNC1</i>    | Body    |

|            |    |             |          |       |       |         |       |  |                  |         |
|------------|----|-------------|----------|-------|-------|---------|-------|--|------------------|---------|
| cg10687131 | 2  | 20,871,002  | 0.032888 | 0.228 | 0.302 |         |       |  | <i>GDF7</i>      | Body    |
| cg11848254 | 7  | 134,939,464 | 9.61E-08 | 0.228 | 0.229 |         |       |  | <i>STRA8</i>     | Body    |
| cg11841529 | 20 | 44,746,751  | 0.028131 | 0.228 | 0.338 |         |       |  | <i>CD40</i>      | TSS200  |
| cg04365202 | 1  | 197,889,248 | 0.007592 | 0.228 | 0.260 |         |       |  | <i>LHX9</i>      | Body    |
| cg20459687 | 13 | 99,128,579  | 2.7E-07  | 0.228 | 0.219 |         |       |  | <i>STK24</i>     | Body    |
| cg24927890 | 5  | 149,980,526 | 0.000302 | 0.228 | 0.212 |         |       |  | <i>SYNPO</i>     | TSS200  |
| cg10502220 | 4  | 176,733,966 | 2.49E-05 | 0.228 | 0.173 |         |       |  | <i>GPM6A</i>     | 1stExon |
| cg14087880 | 10 | 47,083,316  | 0.006783 | 0.228 | 0.091 |         |       |  | <i>PPYR1</i>     | TSS1500 |
| cg11132534 | 2  | 218,114,431 | 1.56E-06 | 0.228 | 0.187 |         |       |  |                  |         |
| cg21752601 | 2  | 27,531,310  | 9.95E-26 | 0.228 | 0.232 |         |       |  | <i>UCN</i>       | TSS200  |
| cg03950655 | 1  | 64,379,958  | 1.15E-06 | 0.228 | 0.250 |         |       |  | <i>ROR1</i>      | Body    |
| cg08355260 | 2  | 74,729,429  | 0.027671 | 0.228 | 0.298 |         |       |  | <i>LOC151534</i> | TSS1500 |
| cg14700707 | 6  | 32,191,840  | 2.11E-07 | 0.228 | 0.251 | 1.1E-30 | 0.162 |  | <i>NOTCH4</i>    | 1stExon |
| cg03509898 | 14 | 104,190,750 | 3.18E-21 | 0.228 | 0.219 |         |       |  | <i>ZFYVE21</i>   | Body    |
| cg19503640 | 5  | 1,503,763   | 1.33E-43 | 0.228 | 0.228 |         |       |  | <i>LPCAT1</i>    | Body    |
| cg01270593 | 14 | 51,339,072  | 1.72E-06 | 0.228 | 0.248 |         |       |  | <i>ABHD12B</i>   | 5'UTR   |
| cg04451570 | 10 | 81,892,128  | 5.97E-05 | 0.228 | 0.199 |         |       |  | <i>PLAC9</i>     | TSS200  |
| cg09807875 | 7  | 34,136,112  | 0.001283 | 0.228 | 0.205 |         |       |  | <i>BMPER</i>     | Body    |
| cg10679688 | 13 | 100,624,965 | 0.013125 | 0.228 | 0.234 |         |       |  | <i>ZIC5</i>      | TSS1500 |
| cg18468354 | 14 | 36,993,517  | 0.002103 | 0.228 | 0.247 |         |       |  |                  |         |
| cg07557630 | 5  | 34,503,180  | 8.71E-11 | 0.228 | 0.216 |         |       |  |                  |         |
| cg12729305 | 1  | 208,497,546 | 0.012122 | 0.228 | 0.152 |         |       |  |                  |         |
| cg14334441 | 6  | 27,235,820  | 0.00038  | 0.228 | 0.253 |         |       |  |                  |         |
| cg21476000 | 12 | 54,430,684  | 2.47E-15 | 0.228 | 0.204 |         |       |  | <i>HOXC4</i>     | 5'UTR   |
| cg21550024 | 4  | 123,747,533 | 5.96E-08 | 0.228 | 0.216 |         |       |  | <i>FGF2</i>      | TSS1500 |
| cg03583050 | 19 | 3,358,182   | 5.6E-08  | 0.228 | 0.189 |         |       |  | <i>NFIC</i>      | TSS1500 |
| cg11012061 | 5  | 145,722,468 | 0.032025 | 0.228 | 0.204 |         |       |  |                  |         |
| cg13011961 | 3  | 67,291,183  | 5.51E-12 | 0.228 | 0.223 |         |       |  |                  |         |
| cg22059812 | 1  | 19,992,564  | 9.72E-05 | 0.228 | 0.198 |         |       |  | <i>HTR6</i>      | 1stExon |
| cg08827358 | 16 | 66,461,802  | 0.002901 | 0.228 | 0.246 |         |       |  | <i>BEAN</i>      | 5'UTR   |
| cg15996644 | 12 | 54,370,352  | 0.006447 | 0.227 | 0.137 |         |       |  |                  |         |
| cg17470942 | 6  | 134,210,279 | 4.16E-05 | 0.227 | 0.246 |         |       |  | <i>TCF21</i>     | 1stExon |
| cg18469813 | 6  | 168,148,018 | 1.02E-16 | 0.227 | 0.221 |         |       |  |                  |         |
| cg06043908 | 8  | 49,467,831  | 3.79E-19 | 0.227 | 0.218 |         |       |  |                  |         |

|            |    |             |          |       |       |           |       |  |                 |         |
|------------|----|-------------|----------|-------|-------|-----------|-------|--|-----------------|---------|
| cg08761350 | X  | 101,967,081 | 0.032535 | 0.227 | 0.236 |           |       |  | <i>GPRASP2</i>  | TSS1500 |
| cg08848847 | 11 | 36,399,468  | 6.4E-05  | 0.227 | 0.123 |           |       |  | <i>PRR5L</i>    | 5'UTR   |
| cg10553103 | 5  | 140,619,567 | 0.004527 | 0.227 | 0.301 |           |       |  | <i>PCDHB19P</i> | TSS200  |
| cg12485727 | 20 | 39,762,753  | 1.29E-12 | 0.227 | 0.218 |           |       |  |                 |         |
| cg16831623 | 20 | 6,750,617   | 0.022735 | 0.227 | 0.275 |           |       |  | <i>BMP2</i>     | 5'UTR   |
| cg23357257 | 16 | 29,887,967  | 1.26E-05 | 0.227 | 0.234 |           |       |  | <i>SEZ6L2</i>   | Body    |
| cg08373610 | 2  | 198,540,621 | 0.002386 | 0.227 | 0.265 | 0.0000873 | 0.073 |  | <i>RFTN2</i>    | TSS200  |
| cg06989610 | 12 | 54,451,877  | 1.82E-06 | 0.227 | 0.167 |           |       |  | <i>FLJ12825</i> | TSS200  |
| cg07568117 | 16 | 2,139,114   | 1.47E-07 | 0.227 | 0.219 |           |       |  | <i>PKD1</i>     | 3'UTR   |
| cg13222091 | 20 | 3,758,207   | 0.000904 | 0.227 | 0.076 |           |       |  | <i>SPEF1</i>    | 3'UTR   |
| cg01751605 | 7  | 137,028,546 | 0.007351 | 0.227 | 0.151 |           |       |  | <i>PTN</i>      | TSS200  |
| cg05996512 | 15 | 63,032,491  | 9E-13    | 0.227 | 0.224 |           |       |  | <i>TLN2</i>     | Body    |
| cg22927247 | 8  | 86,351,195  | 4.43E-10 | 0.227 | 0.223 |           |       |  | <i>CA3</i>      | Body    |
| cg02185666 | 2  | 206,549,667 | 1.69E-05 | 0.227 | 0.218 |           |       |  | <i>NRP2</i>     | Body    |
| cg05534403 | 20 | 61,583,830  | 3.69E-05 | 0.227 | 0.219 |           |       |  | <i>SLC17A9</i>  | TSS200  |
| cg18708252 | 22 | 39,545,030  | 3.55E-08 | 0.227 | 0.263 |           |       |  | <i>CBX7</i>     | Body    |
| cg10646402 | 12 | 15,475,490  | 0.003328 | 0.227 | 0.231 | 5.57E-08  | 0.134 |  | <i>PTPRO</i>    | 1stExon |
| cg19519310 | 6  | 1,389,367   | 0.003826 | 0.227 | 0.127 |           |       |  | <i>FOXF2</i>    | TSS1500 |
| cg03783663 | 13 | 70,682,628  | 0.000131 | 0.227 | 0.249 |           |       |  | <i>KLHL1</i>    | TSS200  |
| cg13154880 | 4  | 48,486,472  | 0.000128 | 0.227 | 0.228 |           |       |  | <i>SLC10A4</i>  | Body    |
| cg15000841 | 11 | 64,815,642  | 0.000275 | 0.227 | 0.217 |           |       |  | <i>NAALADL1</i> | Body    |
| cg16153547 | 2  | 74,725,925  | 0.00251  | 0.227 | 0.260 |           |       |  | <i>LBX2</i>     | Body    |
| cg21141812 | 3  | 48,556,323  | 3.96E-07 | 0.227 | 0.190 |           |       |  | <i>PFKFB4</i>   | 3'UTR   |
| cg22579075 | 7  | 94,250,352  | 0.001431 | 0.227 | 0.292 |           |       |  | <i>SGCE</i>     | Body    |
| cg07250162 | 17 | 46,832,247  | 1.05E-05 | 0.227 | 0.210 |           |       |  |                 |         |
| cg09829263 | 13 | 49,066,969  | 0.001724 | 0.227 | 0.115 |           |       |  | <i>RCBTB2</i>   | Body    |
| cg11469061 | 11 | 31,826,421  | 0.009998 | 0.227 | 0.216 |           |       |  | <i>PAX6</i>     | Body    |
| cg01671895 | 11 | 100,997,799 | 0.000377 | 0.227 | 0.211 |           |       |  | <i>PGR</i>      | Body    |
| cg08479476 | 2  | 70,313,163  | 0.034081 | 0.227 | 0.284 |           |       |  | <i>PCBP1</i>    | TSS1500 |
| cg14081465 | 9  | 119,722,239 | 2.9E-07  | 0.227 | 0.218 |           |       |  | <i>ASTN2</i>    | Body    |
| cg23280568 | 17 | 46,534,400  | 1.66E-09 | 0.227 | 0.188 |           |       |  |                 |         |
| cg05082708 | 4  | 4,765,299   | 0.000106 | 0.227 | 0.207 |           |       |  |                 |         |
| cg05874806 | 2  | 102,350,276 | 4.89E-06 | 0.227 | 0.231 |           |       |  | <i>MAP4K4</i>   | Body    |
| cg07719621 | 16 | 54,970,469  | 0.007837 | 0.227 | 0.284 |           |       |  |                 |         |

|            |    |             |          |       |       |          |       |     |                  |         |
|------------|----|-------------|----------|-------|-------|----------|-------|-----|------------------|---------|
| cg15158977 | 17 | 62,962,238  | 0.000219 | 0.227 | 0.228 |          |       |     |                  |         |
| cg26620147 | 12 | 58,210,716  | 1.68E-08 | 0.227 | 0.238 |          |       |     | <i>AVIL</i>      | TSS1500 |
| cg02119938 | 15 | 78,505,051  | 1.05E-09 | 0.227 | 0.232 |          |       |     | <i>ACSBG1</i>    | Body    |
| cg03408904 | 22 | 17,956,462  | 5.3E-12  | 0.227 | 0.199 |          |       |     | <i>CECR2</i>     | TSS200  |
| cg08714590 | 7  | 90,895,894  | 4.86E-05 | 0.227 | 0.248 |          |       |     | <i>FZD1</i>      | 1stExon |
| cg10105237 | 8  | 135,726,091 | 5.13E-14 | 0.227 | 0.229 |          |       |     | <i>ZFAT</i>      | TSS1500 |
| cg02124184 | 5  | 72,950,691  | 1.48E-20 | 0.227 | 0.214 |          |       | Yes | <i>RGNEF</i>     | 5'UTR   |
| cg06654127 | 6  | 41,395,230  | 0.001786 | 0.227 | 0.184 |          |       |     |                  |         |
| cg27178922 | 1  | 213,476,578 | 7.85E-20 | 0.227 | 0.196 |          |       |     |                  |         |
| cg08108750 | 15 | 96,889,464  | 0.000627 | 0.227 | 0.240 |          |       |     |                  |         |
| cg21280510 | 1  | 40,137,089  | 0.001675 | 0.227 | 0.147 | 1.32E-11 | 0.120 |     | <i>NT5C1A</i>    | Body    |
| cg17104258 | 1  | 167,090,646 | 0.01966  | 0.227 | 0.098 |          |       |     | <i>DUSP27</i>    | Body    |
| cg07021447 | 14 | 69,418,951  | 6.37E-09 | 0.227 | 0.217 |          |       |     | <i>ACTN1</i>     | Body    |
| cg10714061 | 6  | 33,714,631  | 6.37E-12 | 0.227 | 0.217 |          |       |     | <i>IP6K3</i>     | 1stExon |
| cg06769082 | 7  | 99,156,634  | 0.016126 | 0.227 | 0.175 |          |       |     | <i>ZNF655</i>    | 5'UTR   |
| cg03774514 | 20 | 22,563,702  | 0.013585 | 0.227 | 0.189 |          |       |     | <i>FOXA2</i>     | Body    |
| cg06911084 | 7  | 96,652,894  | 0.000204 | 0.227 | 0.181 | 6.09E-20 | 0.232 |     | <i>DLX5</i>      | Body    |
| cg12091498 | 12 | 47,226,255  | 9.22E-06 | 0.227 | 0.228 |          |       |     |                  |         |
| cg21145245 | 5  | 150,593,684 | 3.93E-06 | 0.227 | 0.223 |          |       |     | <i>CCDC69</i>    | Body    |
| cg01334682 | 6  | 21,666,939  | 0.001159 | 0.227 | 0.245 |          |       |     | <i>FLJ22536</i>  | Body    |
| cg01304890 | 4  | 81,106,772  | 0.000127 | 0.227 | 0.229 |          |       |     | <i>PRDM8</i>     | 5'UTR   |
| cg27149179 | 11 | 86,451,848  | 1.53E-06 | 0.227 | 0.211 |          |       |     |                  |         |
| cg23558213 | 22 | 41,215,939  | 3.14E-12 | 0.227 | 0.223 |          |       |     | <i>SLC25A17</i>  | TSS1500 |
| cg24889708 | 17 | 46,678,719  | 2.21E-08 | 0.227 | 0.223 |          |       |     | <i>LOC404266</i> | Body    |
| cg16481365 | 14 | 105,554,352 | 0.006898 | 0.227 | 0.143 |          |       |     |                  |         |
| cg01554437 | 14 | 21,091,422  | 2.91E-05 | 0.227 | 0.254 |          |       |     |                  |         |
| cg02389949 | 7  | 30,176,264  | 5.52E-07 | 0.227 | 0.163 |          |       |     | <i>C7orf41</i>   | Body    |
| cg20561830 | 14 | 81,893,829  | 1.49E-05 | 0.227 | 0.190 |          |       |     |                  |         |
| cg03284866 | 8  | 124,173,487 | 0.000218 | 0.227 | 0.215 |          |       |     |                  |         |
| cg18503912 | 19 | 35,630,279  | 2.27E-08 | 0.227 | 0.218 |          |       |     | <i>FXYD1</i>     | 5'UTR   |
| cg22958090 | 12 | 52,627,438  | 1.73E-08 | 0.227 | 0.221 |          |       |     | <i>KRT7</i>      | Body    |
| cg12418190 | 15 | 37,403,304  | 0.007172 | 0.227 | 0.131 |          |       |     |                  |         |
| cg04424215 | X  | 111,325,143 | 5.01E-06 | 0.227 | 0.217 |          |       |     | <i>TRPC5</i>     | 5'UTR   |
| cg06686156 | 16 | 20,420,222  | 5.17E-16 | 0.227 | 0.235 |          |       |     | <i>ACSM5</i>     | TSS1500 |

|            |    |             |          |       |       |          |       |     |               |         |
|------------|----|-------------|----------|-------|-------|----------|-------|-----|---------------|---------|
| cg09712234 | 16 | 30,614,413  | 5.2E-10  | 0.227 | 0.226 |          |       |     |               |         |
| cg10803577 | 2  | 177,016,837 | 0.000165 | 0.227 | 0.175 |          |       |     | <i>HOXD4</i>  | Body    |
| cg13283952 | 2  | 121,412,005 | 1.58E-09 | 0.227 | 0.234 |          |       |     |               |         |
| cg01250001 | 8  | 103,758,088 | 3.05E-09 | 0.227 | 0.212 |          |       |     |               |         |
| cg04549460 | 8  | 109,095,975 | 0.007431 | 0.227 | 0.231 |          |       |     | <i>RSPO2</i>  | TSS200  |
| cg12057563 | X  | 135,230,841 | 1.27E-05 | 0.227 | 0.246 |          |       |     | <i>FHL1</i>   | Body    |
| cg02241986 | 10 | 5,566,543   | 2.31E-06 | 0.227 | 0.258 |          |       |     | <i>CALML3</i> | TSS1500 |
| cg26493353 | 9  | 91,793,721  | 0.01415  | 0.227 | 0.283 |          |       |     | <i>SHC3</i>   | TSS200  |
| cg13324546 | 8  | 23,564,031  | 0.000197 | 0.227 | 0.204 |          |       |     | <i>NKX2-6</i> | TSS200  |
| cg21899640 | 6  | 168,609,219 | 1.44E-07 | 0.227 | 0.209 |          |       |     |               |         |
| cg02770751 | 19 | 795,467     | 2.97E-07 | 0.227 | 0.235 |          |       |     |               |         |
| cg07852825 | 3  | 172,166,182 | 1.95E-08 | 0.227 | 0.217 |          |       |     | <i>GHSR</i>   | 1stExon |
| cg23331961 | 15 | 72,564,179  | 1.22E-06 | 0.227 | 0.174 |          |       |     | <i>PARP6</i>  | TSS1500 |
| cg25658983 | 13 | 46,426,026  | 0.000331 | 0.227 | 0.206 |          |       |     | <i>SIAH3</i>  | TSS200  |
| cg27229613 | 1  | 229,569,046 | 0.001068 | 0.227 | 0.246 |          |       |     | <i>ACTA1</i>  | 5'UTR   |
| cg06145736 | 3  | 143,559,620 | 2.52E-24 | 0.227 | 0.224 |          |       | Yes | <i>SLC9A9</i> | Body    |
| cg16429975 | 1  | 6,445,632   | 4.26E-07 | 0.227 | 0.184 |          |       |     | <i>ACOT7</i>  | Body    |
| cg07200280 | 3  | 16,554,619  | 0.025997 | 0.227 | 0.324 | 2.59E-07 | 0.100 |     | <i>RFTN1</i>  | 5'UTR   |
| cg09685182 | 3  | 130,236,037 | 0.000573 | 0.227 | 0.240 |          |       |     |               |         |
| cg02646779 | 2  | 72,342,554  | 3.12E-08 | 0.227 | 0.194 |          |       |     |               |         |
| cg15787039 | 15 | 32,934,185  | 2.85E-10 | 0.227 | 0.164 | 4.03E-19 | 0.201 |     | <i>SCG5</i>   | 5'UTR   |
| cg18530551 | 5  | 172,670,879 | 0.013053 | 0.227 | 0.294 |          |       |     |               |         |
| cg06157170 | 6  | 167,764,523 | 0.013829 | 0.227 | 0.112 |          |       |     |               |         |
| cg17094985 | 3  | 159,756,929 | 0.047608 | 0.227 | 0.250 |          |       |     |               |         |
| cg08474786 | 17 | 17,491,465  | 2.23E-17 | 0.227 | 0.238 |          |       |     | <i>PEMT</i>   | Body    |
| cg00456672 | 15 | 62,358,751  | 4.74E-12 | 0.227 | 0.184 |          |       |     | <i>C2CD4A</i> | TSS1500 |
| cg06550984 | 10 | 23,480,002  | 0.031999 | 0.227 | 0.271 |          |       |     | <i>PTF1A</i>  | TSS1500 |
| cg27543403 | 5  | 58,335,880  | 2.5E-06  | 0.227 | 0.201 |          |       |     | <i>PDE4D</i>  | Body    |
| cg08160091 | 4  | 1,398,383   | 0.000487 | 0.227 | 0.135 |          |       |     |               |         |
| cg26082368 | 6  | 37,673,708  | 2.14E-05 | 0.227 | 0.204 |          |       |     |               |         |
| cg06137852 | 13 | 28,545,283  | 1.58E-06 | 0.227 | 0.206 |          |       |     |               |         |
| cg19719930 | 17 | 70,339,343  | 2.13E-07 | 0.227 | 0.199 |          |       |     |               |         |
| cg26174583 | 6  | 1,392,624   | 1.6E-12  | 0.227 | 0.199 |          |       |     | <i>FOXF2</i>  | Body    |
| cg05855039 | 14 | 85,996,751  | 0.044331 | 0.227 | 0.333 |          |       |     | <i>FLRT2</i>  | 1stExon |



|            |    |             |          |       |       |          |       |     |          |         |
|------------|----|-------------|----------|-------|-------|----------|-------|-----|----------|---------|
| cg13396713 | 17 | 505,019     | 3.53E-14 | 0.227 | 0.210 |          |       |     | VPS53    | Body    |
| cg14478713 | 9  | 16,653,688  | 0.029671 | 0.227 | 0.139 |          |       |     | BNC2     | Body    |
| cg26686732 | 20 | 22,562,737  | 0.00302  | 0.227 | 0.233 |          |       |     | FOXA2    | Body    |
| cg00225623 | 13 | 24,845,891  | 0.029224 | 0.227 | 0.057 |          |       |     | SPATA13  | Body    |
| cg04887321 | 16 | 55,090,590  | 0.001982 | 0.227 | 0.258 |          |       |     |          |         |
| cg13547127 | 6  | 145,217,150 | 0.000524 | 0.227 | 0.165 |          |       |     |          |         |
| cg20663495 | 17 | 80,943,851  | 2.72E-11 | 0.227 | 0.228 |          |       |     | B3GNTL1  | Body    |
| cg10591771 | 19 | 3,671,118   | 0.000213 | 0.227 | 0.222 |          |       |     | PIP5K1C  | Body    |
| cg12594244 | 15 | 74,218,754  | 3.97E-13 | 0.227 | 0.221 |          |       |     | LOXL1    | TSS200  |
| cg13372658 | 8  | 49,783,907  | 1.28E-14 | 0.227 | 0.209 |          |       |     |          |         |
| cg02966332 | 20 | 62,369,605  | 1.85E-12 | 0.227 | 0.227 |          |       |     | LIME1    | Body    |
| cg03602280 | 18 | 11,148,914  | 0.026282 | 0.227 | 0.249 |          |       |     | FAM38B   | TSS200  |
| cg09219877 | 16 | 2,287,294   | 0.002543 | 0.227 | 0.149 |          |       |     | DNASE1L2 | Body    |
| cg07005778 | 4  | 188,953,586 | 3.16E-05 | 0.227 | 0.235 |          |       |     |          |         |
| cg22951509 | 5  | 94,955,893  | 0.009593 | 0.227 | 0.153 |          |       |     | GPR150   | TSS200  |
| cg09119688 | X  | 119,133,700 | 0.029669 | 0.227 | 0.264 |          |       |     |          |         |
| cg16617723 | 18 | 24,443,905  | 9.69E-09 | 0.227 | 0.208 |          |       |     | AQP4     | TSS1500 |
| cg24276105 | 11 | 45,686,055  | 0.001567 | 0.227 | 0.196 |          |       |     | CHST1    | 5'UTR   |
| cg05733463 | 11 | 13,282,917  | 1.06E-06 | 0.227 | 0.219 |          |       | Yes |          |         |
| cg25424299 | 3  | 13,319,638  | 0.000547 | 0.227 | 0.245 |          |       |     |          |         |
| cg03245590 | 11 | 15,329,459  | 5.32E-05 | 0.227 | 0.206 |          |       |     |          |         |
| cg05255275 | 14 | 60,952,097  | 0.026313 | 0.227 | 0.177 |          |       |     | C14orf39 | 5'UTR   |
| cg16122427 | 1  | 36,947,989  | 2.26E-07 | 0.227 | 0.252 |          |       |     | CSF3R    | 5'UTR   |
| cg19363579 | 9  | 135,460,728 | 4.41E-05 | 0.227 | 0.220 |          |       |     | BARHL1   | Body    |
| cg14310703 | 3  | 126,006,903 | 0.014051 | 0.227 | 0.139 |          |       |     |          |         |
| cg02061956 | 1  | 146,697,547 | 0.022196 | 0.227 | 0.301 |          |       |     | FMO5     | TSS1500 |
| cg04282694 | 6  | 5,996,412   | 0.001212 | 0.227 | 0.259 |          |       |     |          |         |
| cg16424082 | 12 | 51,323,740  | 2.94E-20 | 0.227 | 0.218 |          |       |     | METTL7A  | Body    |
| cg17533951 | X  | 68,115,082  | 6.41E-22 | 0.227 | 0.228 |          |       |     |          |         |
| cg22635096 | 21 | 46,550,644  | 1.18E-06 | 0.227 | 0.217 |          |       |     | ADARB1   | 5'UTR   |
| cg00561775 | 16 | 1,159,805   | 0.000257 | 0.227 | 0.200 |          |       |     |          |         |
| cg09303936 | 6  | 73,331,290  | 0.02907  | 0.227 | 0.298 |          |       |     | KCNQ5    | TSS1500 |
| cg13351161 | 8  | 27,490,921  | 8.84E-05 | 0.227 | 0.172 | 6.02E-12 | 0.122 |     | SCARA3   | TSS1500 |
| cg20314884 | 2  | 220,108,094 | 0.008748 | 0.227 | 0.154 |          |       |     | GLB1L    | Body    |

|            |    |             |          |       |       |          |       |  |                |         |
|------------|----|-------------|----------|-------|-------|----------|-------|--|----------------|---------|
| cg00258316 | 1  | 8,194,341   | 1.28E-08 | 0.227 | 0.219 |          |       |  |                |         |
| cg14528374 | 7  | 99,178,047  | 0.004225 | 0.227 | 0.145 |          |       |  |                |         |
| cg01310096 | 13 | 35,474,735  | 9.48E-10 | 0.227 | 0.217 |          |       |  |                |         |
| cg05196905 | 21 | 47,877,665  | 0.00011  | 0.227 | 0.183 |          |       |  | <i>DIP2A</i>   | TSS1500 |
| cg25205489 | 13 | 24,125,993  | 2.91E-10 | 0.227 | 0.200 |          |       |  |                |         |
| cg00979931 | 11 | 72,533,664  | 0.000116 | 0.227 | 0.116 |          |       |  | <i>ATG16L2</i> | Body    |
| cg02955098 | 1  | 3,473,665   | 9.02E-06 | 0.227 | 0.249 |          |       |  | <i>MEGF6</i>   | Body    |
| cg18362330 | 5  | 134,872,659 | 8.47E-07 | 0.227 | 0.237 |          |       |  | <i>NEUROG1</i> | TSS1500 |
| cg18453446 | 21 | 28,219,387  | 0.012475 | 0.227 | 0.190 |          |       |  |                |         |
| cg19047068 | 17 | 34,119,162  | 5.2E-07  | 0.227 | 0.257 |          |       |  | <i>MMP28</i>   | Body    |
| cg24794228 | 19 | 52,391,166  | 0.034608 | 0.227 | 0.211 |          |       |  | <i>ZNF577</i>  | Body    |
| cg09456289 | 2  | 43,038,399  | 0.036255 | 0.227 | 0.149 |          |       |  |                |         |
| cg13904481 | 5  | 132,118,820 | 9.99E-06 | 0.227 | 0.220 |          |       |  |                |         |
| cg17782974 | 10 | 104,406,990 | 4.54E-05 | 0.227 | 0.258 |          |       |  | <i>TRIM8</i>   | Body    |
| cg25333529 | 7  | 73,536,420  | 7.5E-18  | 0.227 | 0.213 |          |       |  | <i>LIMK1</i>   | 3'UTR   |
| cg04750421 | 14 | 97,208,333  | 1.26E-05 | 0.227 | 0.226 |          |       |  |                |         |
| cg24529736 | 13 | 96,205,679  | 0.002586 | 0.227 | 0.223 |          |       |  | <i>CLDN10</i>  | Body    |
| cg25946059 | 2  | 242,973,936 | 1.05E-06 | 0.227 | 0.200 |          |       |  |                |         |
| cg03954144 | 13 | 20,751,679  | 7.31E-17 | 0.227 | 0.201 |          |       |  |                |         |
| cg10548805 | 14 | 101,538,070 | 0.00035  | 0.227 | 0.249 |          |       |  |                |         |
| cg19515245 | 2  | 97,151,922  | 1.64E-05 | 0.227 | 0.184 |          |       |  |                |         |
| cg25071651 | 4  | 101,112,317 | 4.32E-07 | 0.227 | 0.188 |          |       |  | <i>DDIT4L</i>  | TSS1500 |
| cg25115460 | 1  | 3,607,110   | 0.007669 | 0.227 | 0.202 | 1.47E-13 | 0.168 |  | <i>TP73</i>    | Body    |
| cg21488066 | 6  | 28,367,898  | 3.31E-05 | 0.227 | 0.185 |          |       |  | <i>ZSCAN12</i> | TSS1500 |
| cg13906377 | 1  | 63,792,695  | 0.039999 | 0.227 | 0.280 |          |       |  |                |         |
| cg04261556 | 7  | 20,373,143  | 9.48E-14 | 0.227 | 0.222 |          |       |  | <i>ITGB8</i>   | Body    |
| cg09635954 | 7  | 29,605,624  | 4E-12    | 0.227 | 0.211 |          |       |  | <i>PRR15</i>   | 5'UTR   |
| cg10784519 | 6  | 30,737,231  | 1.55E-06 | 0.227 | 0.223 |          |       |  |                |         |
| cg25394505 | 10 | 134,399,880 | 1.55E-12 | 0.227 | 0.217 |          |       |  | <i>INPP5A</i>  | Body    |
| cg25535982 | 11 | 74,030,400  | 4.6E-07  | 0.227 | 0.233 |          |       |  |                |         |
| cg05336982 | 16 | 69,564,735  | 0.002173 | 0.227 | 0.222 |          |       |  |                |         |
| cg19092163 | 17 | 4,403,417   | 0.001633 | 0.227 | 0.208 |          |       |  | <i>SPNS2</i>   | Body    |
| cg13853591 | 1  | 65,468,921  | 0.001113 | 0.227 | 0.135 |          |       |  |                |         |
| cg05457768 | 6  | 28,751,790  | 0.04141  | 0.227 | 0.262 |          |       |  |                |         |

|            |    |             |          |       |       |          |       |  |                |         |
|------------|----|-------------|----------|-------|-------|----------|-------|--|----------------|---------|
| cg15256492 | 12 | 115,125,475 | 1.41E-13 | 0.227 | 0.213 |          |       |  |                |         |
| cg15944766 | 8  | 29,210,790  | 0.045459 | 0.227 | 0.231 |          |       |  |                |         |
| cg03506028 | 7  | 35,494,689  | 0.001418 | 0.227 | 0.215 |          |       |  |                |         |
| cg26916780 | 15 | 64,889,554  | 1.11E-05 | 0.227 | 0.174 |          |       |  | <i>ZNF609</i>  | Body    |
| cg01840020 | 17 | 4,648,949   | 0.001508 | 0.227 | 0.229 |          |       |  | <i>ZMYND15</i> | Body    |
| cg00143249 | 7  | 156,798,810 | 0.001028 | 0.227 | 0.233 |          |       |  | <i>MXN1</i>    | Body    |
| cg03825231 | 3  | 125,898,467 | 0.019513 | 0.227 | 0.243 |          |       |  | <i>ALDH1L1</i> | 5'UTR   |
| cg03866862 | 6  | 33,401,542  | 5.82E-15 | 0.227 | 0.220 |          |       |  | <i>SYNGAP1</i> | Body    |
| cg07220152 | 6  | 30,737,270  | 0.002295 | 0.227 | 0.260 |          |       |  |                |         |
| cg09439817 | 17 | 45,933,066  | 1.29E-08 | 0.227 | 0.242 |          |       |  | <i>SP6</i>     | 5'UTR   |
| cg01845476 | 9  | 136,833,401 | 3.03E-17 | 0.226 | 0.197 |          |       |  | <i>VAV2</i>    | Body    |
| cg17679604 | 5  | 115,790,387 | 8.68E-06 | 0.226 | 0.224 |          |       |  | <i>SEMA6A</i>  | Body    |
| cg18280830 | 14 | 57,265,875  | 1.11E-07 | 0.226 | 0.229 |          |       |  |                |         |
| cg11536940 | 8  | 97,658,076  | 0.012799 | 0.226 | 0.135 | 4.56E-23 | 0.203 |  | <i>PGCP</i>    | 5'UTR   |
| cg17161130 | 10 | 113,544,977 | 2.82E-05 | 0.226 | 0.200 |          |       |  |                |         |
| cg09754272 | 1  | 156,399,638 | 0.000121 | 0.226 | 0.303 |          |       |  | <i>C1orf61</i> | TSS1500 |
| cg00152008 | 1  | 50,889,225  | 0.028812 | 0.226 | 0.196 |          |       |  | <i>DMRTA2</i>  | TSS200  |
| cg05002166 | 1  | 217,119,469 | 1.06E-14 | 0.226 | 0.234 |          |       |  | <i>ESRRG</i>   | 5'UTR   |
| cg22886649 | 7  | 190,349     | 2.94E-30 | 0.226 | 0.218 |          |       |  |                |         |
| cg25277809 | 2  | 128,453,484 | 0.034069 | 0.226 | 0.159 |          |       |  |                |         |
| cg16931664 | 11 | 11,169,707  | 1.22E-05 | 0.226 | 0.229 |          |       |  |                |         |
| cg09336988 | 19 | 42,386,872  | 1.9E-06  | 0.226 | 0.205 |          |       |  | <i>ARHGEF1</i> | TSS1500 |
| cg13673514 | 14 | 101,035,818 | 1.86E-06 | 0.226 | 0.232 | 1.62E-12 | 0.128 |  | <i>BEGAIN</i>  | TSS1500 |
| cg24790912 | 7  | 66,162,803  | 1.23E-15 | 0.226 | 0.197 |          |       |  |                |         |
| cg00708598 | 13 | 53,313,895  | 0.000891 | 0.226 | 0.195 | 2.1E-22  | 0.168 |  | <i>LECT1</i>   | 1stExon |
| cg07959574 | 4  | 42,401,056  | 0.020472 | 0.226 | 0.249 |          |       |  | <i>SHISA3</i>  | Body    |
| cg15365032 | 9  | 100,610,697 | 0.01142  | 0.226 | 0.181 |          |       |  |                |         |
| cg02455346 | 1  | 221,055,401 | 2.28E-17 | 0.226 | 0.224 |          |       |  | <i>HLX</i>     | Body    |
| cg05738240 | 12 | 114,337,927 | 1.22E-05 | 0.226 | 0.205 |          |       |  | <i>RBM19</i>   | Body    |
| cg05940514 | 17 | 39,791,696  | 0.000155 | 0.226 | 0.223 |          |       |  |                |         |
| cg06447424 | 13 | 20,875,743  | 3.4E-05  | 0.226 | 0.240 |          |       |  |                |         |
| cg16820615 | 13 | 114,884,918 | 0.006446 | 0.226 | 0.253 |          |       |  | <i>RASA3</i>   | Body    |
| cg01907106 | 22 | 29,875,592  | 0.001637 | 0.226 | 0.267 |          |       |  | <i>NEFH</i>    | TSS1500 |
| cg02748089 | 16 | 78,540,172  | 7.94E-10 | 0.226 | 0.210 |          |       |  | <i>WWOX</i>    | Body    |

|            |    |             |          |       |       |          |       |  |                  |         |
|------------|----|-------------|----------|-------|-------|----------|-------|--|------------------|---------|
| cg16590189 | 5  | 175,299,798 | 0.018783 | 0.226 | 0.263 |          |       |  | <i>CPLX2</i>     | 5'UTR   |
| cg21697381 | 17 | 33,759,957  | 0.01629  | 0.226 | 0.163 |          |       |  | <i>SLFN12</i>    | TSS1500 |
| cg01536803 | 7  | 157,968,578 | 2E-11    | 0.226 | 0.221 |          |       |  | <i>PTPRN2</i>    | Body    |
| cg02372786 | 2  | 45,167,549  | 6.56E-05 | 0.226 | 0.230 |          |       |  | <i>SIX3</i>      | TSS1500 |
| cg12091331 | 8  | 42,065,314  | 0.00046  | 0.226 | 0.142 | 3.39E-26 | 0.238 |  | <i>PLAT</i>      | TSS200  |
| cg09269891 | 16 | 3,843,415   | 9.22E-07 | 0.226 | 0.209 |          |       |  | <i>CREBBP</i>    | Body    |
| cg11430077 | 10 | 8,099,018   | 2.24E-08 | 0.226 | 0.225 |          |       |  | <i>GATA3</i>     | Body    |
| cg05501584 | 15 | 92,936,306  | 0.025487 | 0.226 | 0.227 |          |       |  | <i>ST8SIA2</i>   | TSS1500 |
| cg05545272 | X  | 43,741,376  | 0.003411 | 0.226 | 0.081 |          |       |  | <i>MAOB</i>      | Body    |
| cg03322057 | 1  | 172,114,419 | 5.85E-06 | 0.226 | 0.235 |          |       |  | <i>DNM3</i>      | Body    |
| cg26968812 | 19 | 16,186,873  | 0.000565 | 0.226 | 0.220 | 3.88E-31 | 0.188 |  | <i>TPM4</i>      | Body    |
| cg26950568 | 13 | 30,626,440  | 0.001374 | 0.226 | 0.206 |          |       |  |                  |         |
| cg05544396 | 16 | 66,959,780  | 4.26E-07 | 0.226 | 0.217 |          |       |  | <i>RRAD</i>      | TSS1500 |
| cg08877374 | 1  | 31,845,904  | 4.3E-05  | 0.226 | 0.187 |          |       |  | <i>FABP3</i>     | 1stExon |
| cg09151742 | 12 | 122,018,897 | 0.010435 | 0.226 | 0.186 |          |       |  | <i>KDM2B</i>     | 5'UTR   |
| cg17573720 | 12 | 54,359,712  | 0.011001 | 0.226 | 0.283 |          |       |  | <i>HOTAIR</i>    | Body    |
| cg18942298 | 20 | 42,809,578  | 5.45E-06 | 0.226 | 0.203 |          |       |  | <i>JPH2</i>      | Body    |
| cg26310551 | 14 | 24,780,540  | 0.000498 | 0.226 | 0.201 |          |       |  | <i>LTB4R2</i>    | Body    |
| cg10363397 | Y  | 15,864,778  | 0.004176 | 0.226 | 0.192 |          |       |  |                  |         |
| cg11525020 | 20 | 17,674,233  | 0.00554  | 0.226 | 0.237 |          |       |  | <i>BANF2</i>     | TSS200  |
| cg27501686 | 12 | 2,184,874   | 1.45E-15 | 0.226 | 0.206 |          |       |  | <i>CACNA1C</i>   | Body    |
| cg18645906 | 4  | 15,704,599  | 0.039162 | 0.226 | 0.256 |          |       |  | <i>BST1</i>      | 1stExon |
| cg17566560 | 20 | 35,094,679  | 7.08E-24 | 0.226 | 0.228 |          |       |  | <i>DLGAP4</i>    | Body    |
| cg26382173 | 14 | 105,994,265 | 0.00088  | 0.226 | 0.175 |          |       |  | <i>TMEM121</i>   | 5'UTR   |
| cg07333715 | 11 | 2,292,691   | 0.007157 | 0.226 | 0.234 |          |       |  | <i>ASCL2</i>     | TSS1500 |
| cg14295696 | X  | 135,230,717 | 1.91E-07 | 0.226 | 0.223 |          |       |  | <i>FHL1</i>      | Body    |
| cg19748341 | 17 | 48,503,357  | 2.69E-06 | 0.226 | 0.154 |          |       |  | <i>ACSF2</i>     | TSS200  |
| cg08353973 | 15 | 66,914,175  | 1.25E-07 | 0.226 | 0.223 |          |       |  |                  |         |
| cg08993690 | 4  | 124,621,838 | 2.37E-09 | 0.226 | 0.215 |          |       |  | <i>LOC285419</i> | Body    |
| cg09220235 | 1  | 204,162,877 | 1.64E-13 | 0.226 | 0.221 |          |       |  | <i>KISS1</i>     | 5'UTR   |
| cg24780240 | X  | 68,052,409  | 1.05E-22 | 0.226 | 0.225 |          |       |  | <i>EFNB1</i>     | Body    |
| cg17091312 | 2  | 46,558,320  | 3.27E-12 | 0.226 | 0.217 |          |       |  | <i>EPAS1</i>     | Body    |
| cg00049323 | 5  | 472,564     | 0.022668 | 0.226 | 0.255 |          |       |  | <i>LOC25845</i>  | Body    |
| cg03416521 | 20 | 19,958,192  | 0.013361 | 0.226 | 0.134 |          |       |  | <i>RIN2</i>      | Body    |

|            |    |             |          |       |       |          |       |     |                     |         |
|------------|----|-------------|----------|-------|-------|----------|-------|-----|---------------------|---------|
| cg08930904 | 17 | 80,297,325  | 0.000583 | 0.226 | 0.270 |          |       |     |                     |         |
| cg01049870 | 14 | 95,601,239  | 2.58E-23 | 0.226 | 0.207 |          |       |     | <i>DICER1</i>       | 5'UTR   |
| cg04697946 | 2  | 3,654,582   | 1.32E-05 | 0.226 | 0.216 |          |       |     | <i>COLEC11</i>      | Body    |
| cg20270653 | 7  | 70,962,720  | 0.002128 | 0.226 | 0.178 |          |       |     | <i>WBSCR17</i>      | Body    |
| cg03018679 | 12 | 120,241,922 | 2.01E-14 | 0.226 | 0.210 |          |       |     | <i>CIT</i>          | Body    |
| cg13372811 | 1  | 110,627,590 | 3.47E-07 | 0.226 | 0.219 |          |       |     |                     |         |
| cg18684951 | 5  | 141,700,490 | 1.81E-10 | 0.226 | 0.220 |          |       |     | <i>SPRY4</i>        | 5'UTR   |
| cg19005955 | 5  | 132,938,694 | 5.46E-06 | 0.226 | 0.198 |          |       |     | <i>FSTL4</i>        | Body    |
| cg20907806 | 12 | 570,249     | 7.02E-14 | 0.226 | 0.199 |          |       |     | <i>B4GALNT3</i>     | Body    |
| cg25681339 | 17 | 1,174,148   | 0.000317 | 0.226 | 0.222 |          |       |     | <i>BHLHA9</i>       | 1stExon |
| cg27385757 | 6  | 30,656,024  | 4.87E-13 | 0.226 | 0.193 |          |       |     | <i>KIAA1949</i>     | TSS1500 |
| cg09299055 | 15 | 41,793,629  | 0.001983 | 0.226 | 0.128 |          |       |     | <i>ITPKA</i>        | Body    |
| cg13702421 | 2  | 172,955,759 | 1.49E-06 | 0.226 | 0.236 |          |       |     |                     |         |
| cg00586817 | 2  | 200,329,872 | 4.47E-08 | 0.226 | 0.217 |          |       |     |                     |         |
| cg11616384 | X  | 114,849,448 | 0.02083  | 0.226 | 0.205 |          |       |     | <i>PLS3</i>         | Body    |
| cg14687029 | 11 | 41,519,708  | 0.031927 | 0.226 | 0.130 |          |       |     |                     |         |
| cg16962008 | 7  | 48,075,950  | 0.003905 | 0.226 | 0.095 |          |       |     | <i>C7orf57</i>      | Body    |
| cg09527670 | 19 | 5,059,110   | 7.36E-15 | 0.226 | 0.211 |          |       |     | <i>KDM4B</i>        | Body    |
| cg12329275 | 10 | 11,912,597  | 7.81E-22 | 0.226 | 0.206 |          |       |     | <i>C10orf47</i>     | 3'UTR   |
| cg23882658 | 17 | 1,959,132   | 0.005077 | 0.226 | 0.219 |          |       |     | <i>HIC1</i>         | TSS1500 |
| cg13616314 | 17 | 13,472,852  | 0.000191 | 0.226 | 0.199 |          |       | Yes | <i>HS3ST3A1</i>     | Body    |
| cg25216696 | 8  | 11,565,351  | 0.000348 | 0.226 | 0.234 | 1.66E-21 | 0.182 |     | <i>GATA4</i>        | 5'UTR   |
| cg05387399 | 10 | 124,893,766 | 0.004346 | 0.226 | 0.253 |          |       |     |                     |         |
| cg18052274 | 11 | 19,737,158  | 0.001621 | 0.226 | 0.172 |          |       |     | <i>LOC100126784</i> | TSS1500 |
| cg26660656 | 1  | 245,753,539 | 7.75E-24 | 0.226 | 0.196 |          |       |     | <i>KIF26B</i>       | Body    |
| cg26778345 | 16 | 8,806,586   | 1.01E-06 | 0.226 | 0.236 |          |       |     | <i>ABAT</i>         | 5'UTR   |
| cg02898493 | 17 | 62,097,918  | 0.011763 | 0.226 | 0.217 |          |       |     | <i>ICAM2</i>        | 5'UTR   |
| cg02540827 | 2  | 201,221,975 | 1.74E-15 | 0.226 | 0.241 |          |       |     | <i>SPATS2L</i>      | 5'UTR   |
| cg02793948 | 11 | 68,095,662  | 0.001843 | 0.226 | 0.153 |          |       |     | <i>LRP5</i>         | Body    |
| cg12350762 | 18 | 55,106,285  | 0.044447 | 0.226 | 0.211 |          |       |     | <i>ONECUT2</i>      | Body    |
| cg13292607 | 10 | 126,751,950 | 0.049258 | 0.226 | 0.234 |          |       |     | <i>CTBP2</i>        | 5'UTR   |
| cg16719560 | 2  | 85,811,421  | 5.55E-05 | 0.226 | 0.222 |          |       |     | <i>VAMP5</i>        | TSS200  |
| cg23492779 | 6  | 36,928,572  | 0.000105 | 0.226 | 0.203 |          |       |     | <i>PI16</i>         | Body    |
| cg06409824 | 6  | 30,227,825  | 4.36E-08 | 0.226 | 0.224 |          |       |     | <i>HLA-L</i>        | Body    |

|            |    |             |          |       |       |            |       |  |                   |         |
|------------|----|-------------|----------|-------|-------|------------|-------|--|-------------------|---------|
| cg10643691 | 8  | 95,246,514  | 0.023361 | 0.226 | 0.283 |            |       |  |                   |         |
| cg15027300 | 19 | 38,877,874  | 5.63E-16 | 0.226 | 0.184 |            |       |  | <i>GGN</i>        | Body    |
| cg03175771 | 16 | 30,661,534  | 0.000606 | 0.226 | 0.244 |            |       |  | <i>PRR14</i>      | TSS1500 |
| cg18321976 | 12 | 53,893,000  | 7.77E-05 | 0.226 | 0.132 |            |       |  | <i>MAP3K12</i>    | 5'UTR   |
| cg22268231 | 19 | 50,922,484  | 0.004335 | 0.226 | 0.224 | 0.00607046 | 0.050 |  | <i>SPIB</i>       | Body    |
| cg24178740 | 2  | 219,850,465 | 5.13E-14 | 0.226 | 0.183 | 1.89E-09   | 0.081 |  | <i>FEV</i>        | TSS200  |
| cg25734913 | 5  | 172,672,390 | 0.000183 | 0.226 | 0.217 |            |       |  |                   |         |
| cg09336406 | 2  | 20,068,906  | 0.007084 | 0.226 | 0.125 |            |       |  |                   |         |
| cg11823511 | 1  | 91,183,697  | 0.037985 | 0.226 | 0.255 |            |       |  | <i>BARHL2</i>     | TSS1500 |
| cg00318111 | 7  | 6,010,084   | 0.000413 | 0.226 | 0.235 |            |       |  | <i>RSPH10B</i>    | 5'UTR   |
| cg04065086 | 1  | 151,104,186 | 0.001858 | 0.226 | 0.226 |            |       |  | <i>SEMA6C</i>     | 3'UTR   |
| cg08965888 | 11 | 44,341,446  | 0.002453 | 0.226 | 0.236 |            |       |  |                   |         |
| cg09650907 | 17 | 71,224,983  | 0.017794 | 0.226 | 0.273 |            |       |  | <i>FAM104A</i>    | Body    |
| cg11320187 | 20 | 33,578,094  | 1.7E-16  | 0.226 | 0.231 |            |       |  | <i>MYH7B</i>      | Body    |
| cg04159302 | 5  | 150,162,068 | 0.003928 | 0.226 | 0.225 |            |       |  | <i>C5orf62</i>    | Body    |
| cg12702354 | 1  | 77,043,128  | 4.21E-09 | 0.226 | 0.213 |            |       |  | <i>ST6GALNAC3</i> | Body    |
| cg25271892 | 11 | 62,690,462  | 3.86E-10 | 0.226 | 0.211 |            |       |  | <i>CHRM1</i>      | TSS1500 |
| cg03447967 | 2  | 45,163,099  | 1.49E-09 | 0.226 | 0.209 |            |       |  |                   |         |
| cg03648020 | 1  | 931,327     | 1.17E-11 | 0.226 | 0.199 |            |       |  |                   |         |
| cg20939662 | 9  | 126,777,160 | 8E-08    | 0.226 | 0.226 |            |       |  | <i>LHX2</i>       | Body    |
| cg18106312 | 14 | 51,560,488  | 0.038475 | 0.226 | 0.219 |            |       |  | <i>TRIM9</i>      | Body    |
| cg26233253 | 22 | 31,032,613  | 6.27E-08 | 0.226 | 0.182 | 8.14E-17   | 0.139 |  | <i>SLC35E4</i>    | 1stExon |
| cg27527922 | 1  | 6,260,181   | 6.53E-05 | 0.226 | 0.189 |            |       |  | <i>RPL22</i>      | TSS1500 |
| cg10613707 | 5  | 3,394,463   | 1.35E-07 | 0.226 | 0.209 |            |       |  |                   |         |
| cg11983196 | 1  | 98,518,557  | 1.16E-14 | 0.226 | 0.211 |            |       |  |                   |         |
| cg00124095 | 3  | 72,305,082  | 0.024932 | 0.226 | 0.088 |            |       |  |                   |         |
| cg02192520 | 12 | 56,114,155  | 5.67E-05 | 0.226 | 0.254 | 3.13E-21   | 0.252 |  | <i>RDH5</i>       | 1stExon |
| cg04598121 | 8  | 57,358,505  | 0.000329 | 0.226 | 0.244 |            |       |  | <i>PENK</i>       | Body    |
| cg07247419 | 20 | 21,376,484  | 0.00052  | 0.226 | 0.242 |            |       |  | <i>NKX2-4</i>     | 3'UTR   |
| cg07809589 | 2  | 66,664,535  | 0.024259 | 0.226 | 0.293 |            |       |  | <i>MEIS1</i>      | Body    |
| cg16810031 | 17 | 38,024,146  | 1.91E-11 | 0.226 | 0.234 |            |       |  | <i>ZBP2</i>       | TSS1500 |
| cg21249091 | 2  | 173,204,540 | 1.98E-10 | 0.226 | 0.212 |            |       |  |                   |         |
| cg23155717 | 8  | 145,033,622 | 2.85E-10 | 0.226 | 0.207 |            |       |  | <i>PLEC1</i>      | Body    |
| cg27657333 | 12 | 30,975,867  | 0.000429 | 0.226 | 0.219 |            |       |  |                   |         |

|            |    |             |          |       |       |          |       |     |                  |         |
|------------|----|-------------|----------|-------|-------|----------|-------|-----|------------------|---------|
| cg00426822 | 1  | 39,546,536  | 7.39E-12 | 0.226 | 0.228 |          |       |     | <i>MACF1</i>     | TSS1500 |
| cg01042246 | 2  | 171,572,902 | 0.048811 | 0.226 | 0.185 |          |       |     | <i>SP5</i>       | Body    |
| cg13099330 | 3  | 139,257,799 | 1.52E-06 | 0.226 | 0.228 | 1.31E-16 | 0.152 |     | <i>RBP1</i>      | Body    |
| cg03733831 | X  | 17,653,562  | 3.81E-08 | 0.226 | 0.233 |          |       |     | <i>NHS</i>       | 1stExon |
| cg13229972 | 1  | 110,335,018 | 8.85E-09 | 0.226 | 0.226 |          |       |     |                  |         |
| cg19264571 | 18 | 10,454,085  | 5.56E-13 | 0.226 | 0.225 | 3.09E-19 | 0.173 |     | <i>APCDD1</i>    | TSS1500 |
| cg07983905 | 20 | 3,073,561   | 0.002332 | 0.226 | 0.139 |          |       |     |                  |         |
| cg01170045 | 14 | 60,982,832  | 5.27E-10 | 0.226 | 0.205 |          |       |     |                  |         |
| cg04228468 | 3  | 164,913,627 | 0.000112 | 0.226 | 0.278 |          |       |     | <i>SLITRK3</i>   | 5'UTR   |
| cg18587340 | 20 | 39,995,654  | 8.56E-06 | 0.226 | 0.191 |          |       |     | <i>EMILIN3</i>   | TSS200  |
| cg01705587 | 1  | 149,889,364 | 9.06E-05 | 0.226 | 0.266 |          |       |     | <i>SV2A</i>      | 5'UTR   |
| cg10086659 | 2  | 177,040,226 | 6.56E-06 | 0.226 | 0.161 |          |       |     |                  |         |
| cg26683259 | 5  | 77,943,417  | 0.003526 | 0.226 | 0.182 |          |       |     | <i>LHFPL2</i>    | 5'UTR   |
| cg02311193 | 17 | 46,660,002  | 2.2E-11  | 0.226 | 0.204 |          |       |     |                  |         |
| cg14439622 | 18 | 19,752,292  | 4.98E-09 | 0.226 | 0.197 |          |       |     | <i>GATA6</i>     | Body    |
| cg25109721 | 17 | 48,125,064  | 1.56E-07 | 0.226 | 0.233 |          |       |     |                  |         |
| cg25195334 | 8  | 23,710,946  | 0.001815 | 0.226 | 0.186 |          |       | Yes | <i>STC1</i>      | Body    |
| cg24234651 | 12 | 75,728,471  | 0.001031 | 0.226 | 0.185 |          |       |     | <i>GLIPR1L1</i>  | 5'UTR   |
| cg25397973 | 6  | 5,996,562   | 0.009617 | 0.226 | 0.181 |          |       |     |                  |         |
| cg03883256 | 11 | 119,235,802 | 6.79E-05 | 0.226 | 0.223 |          |       |     | <i>USP2</i>      | TSS1500 |
| cg10308785 | 17 | 46,673,625  | 1.05E-07 | 0.226 | 0.215 |          |       |     | <i>LOC404266</i> | Body    |
| cg01158277 | 11 | 111,783,327 | 0.004627 | 0.226 | 0.321 |          |       |     | <i>CRYAB</i>     | TSS1500 |
| cg14693194 | 18 | 6,415,252   | 0.011706 | 0.226 | 0.209 |          |       |     | <i>L3MBTL4</i>   | TSS1500 |
| cg13615136 | 9  | 116,362,889 | 1.01E-11 | 0.226 | 0.218 |          |       |     |                  |         |
| cg25147158 | 4  | 165,898,707 | 2.2E-08  | 0.226 | 0.223 |          |       |     | <i>TRIM61</i>    | 1stExon |
| cg04141796 | 5  | 42,950,062  | 0.00142  | 0.226 | 0.186 |          |       |     |                  |         |
| cg13619054 | 9  | 129,370,554 | 0.007861 | 0.226 | 0.117 |          |       |     |                  |         |
| cg26371327 | 1  | 16,473,143  | 6.84E-15 | 0.226 | 0.220 |          |       |     | <i>EPHA2</i>     | Body    |
| cg03462322 | 16 | 126,397     | 3.4E-10  | 0.226 | 0.223 |          |       |     | <i>MPG</i>       | TSS1500 |
| cg11354105 | 2  | 25,475,805  | 1.91E-05 | 0.226 | 0.206 |          |       |     | <i>DNMT3A</i>    | Body    |
| cg12777520 | 9  | 129,387,303 | 0.029307 | 0.226 | 0.256 |          |       |     | <i>LMX1B</i>     | Body    |
| cg24253904 | 1  | 201,644,923 | 0.000782 | 0.226 | 0.233 |          |       | Yes | <i>NAV1</i>      | Body    |
| cg03341413 | 15 | 68,125,566  | 0.000621 | 0.226 | 0.234 |          |       |     | <i>LBXCOR1</i>   | Body    |
| cg10572274 | 12 | 104,697,224 | 0.002037 | 0.226 | 0.158 |          |       |     | <i>TXNRD1</i>    | 5'UTR   |

|            |    |             |          |       |       |          |       |     |          |         |
|------------|----|-------------|----------|-------|-------|----------|-------|-----|----------|---------|
| cg13114921 | 12 | 30,976,001  | 4.23E-05 | 0.226 | 0.215 |          |       |     |          |         |
| cg16516639 | 1  | 111,050,810 | 6.25E-09 | 0.226 | 0.223 |          |       |     |          |         |
| cg20122518 | 7  | 810,958     | 0.000267 | 0.226 | 0.218 |          |       |     | HEATR2   | Body    |
| cg02099390 | 3  | 31,959,312  | 8.96E-05 | 0.226 | 0.231 |          |       |     | OSBPL10  | Body    |
| cg03456938 | 16 | 67,197,084  | 0.002553 | 0.226 | 0.281 |          |       |     | HSF4     | TSS1500 |
| cg12351310 | 5  | 52,937,992  | 0.001998 | 0.226 | 0.227 |          |       |     | NDUFS4   | Body    |
| cg05072470 | 13 | 100,643,858 | 0.041752 | 0.226 | 0.269 |          |       |     |          |         |
| cg07387286 | 8  | 39,172,120  | 0.000724 | 0.226 | 0.244 |          |       |     | ADAM5P   | TSS200  |
| cg20301308 | 1  | 65,534,742  | 2.37E-11 | 0.226 | 0.197 |          |       |     |          |         |
| cg21235078 | 9  | 135,645,974 | 0.013613 | 0.226 | 0.219 |          |       |     | C9orf98  | Body    |
| cg26115667 | 14 | 103,294,656 | 6.13E-05 | 0.226 | 0.194 |          |       |     | TRAF3    | 5'UTR   |
| cg09384035 | 8  | 104,131,768 | 8.63E-09 | 0.226 | 0.219 |          |       |     |          |         |
| cg09601505 | 12 | 109,162,445 | 2E-08    | 0.226 | 0.180 |          |       |     |          |         |
| cg11354906 | 4  | 154,710,371 | 0.013318 | 0.226 | 0.290 | 3.17E-16 | 0.159 |     | SFRP2    | TSS200  |
| cg17209471 | 22 | 18,558,411  | 2.13E-29 | 0.226 | 0.227 |          |       |     |          |         |
| cg17552116 | 3  | 126,721,513 | 8.28E-09 | 0.226 | 0.248 |          |       |     | PLXNA1   | Body    |
| cg00810971 | 2  | 65,085,764  | 1.7E-14  | 0.226 | 0.230 |          |       |     |          |         |
| cg05386769 | 2  | 218,681,558 | 2.16E-08 | 0.226 | 0.236 |          |       |     | TNS1     | Body    |
| cg18827470 | 15 | 75,471,200  | 8.26E-05 | 0.226 | 0.217 |          |       |     |          |         |
| cg18616243 | 19 | 7,542,191   | 3.8E-109 | 0.226 | 0.217 |          |       |     | PEX11G   | Body    |
| cg06788790 | 17 | 55,123,356  | 0.00019  | 0.226 | 0.223 |          |       |     | RNF126P1 | Body    |
| cg14518658 | 22 | 37,726,676  | 3.2E-06  | 0.226 | 0.234 |          |       |     |          |         |
| cg09812070 | 4  | 46,995,689  | 0.019496 | 0.226 | 0.223 |          |       |     | GABRA4   | TSS200  |
| cg00149716 | 20 | 13,200,069  | 1.89E-07 | 0.226 | 0.193 |          |       |     |          |         |
| cg05845376 | 5  | 140,683,632 | 3.34E-07 | 0.226 | 0.225 |          |       |     | SLC25A2  | TSS200  |
| cg20802392 | 1  | 150,780,684 | 1.71E-07 | 0.226 | 0.220 | 6.27E-15 | 0.141 |     | CTSK     | 5'UTR   |
| cg26002259 | 14 | 36,976,428  | 0.020706 | 0.226 | 0.278 |          |       |     | SFTA3    | Body    |
| cg19622874 | 14 | 85,998,492  | 0.007008 | 0.225 | 0.287 |          |       |     | FLRT2    | 5'UTR   |
| cg20029745 | 18 | 28,621,985  | 0.022642 | 0.225 | 0.167 |          |       |     | DSC3     | Body    |
| cg14137381 | 5  | 502,291     | 7.21E-05 | 0.225 | 0.256 |          |       | Yes | SLC9A3   | Body    |
| cg18844301 | 2  | 220,379,000 | 0.019935 | 0.225 | 0.209 |          |       |     | ACCN4    | 5'UTR   |
| cg03851159 | 10 | 118,891,090 | 0.02923  | 0.225 | 0.301 |          |       |     | VAX1     | 3'UTR   |
| cg07826859 | 7  | 45,020,086  | 7.27E-11 | 0.225 | 0.200 |          |       |     | MYO1G    | TSS1500 |
| cg27361370 | 3  | 157,813,327 | 0.004368 | 0.225 | 0.187 |          |       |     |          |         |



|            |    |             |          |       |       |          |       |  |          |         |
|------------|----|-------------|----------|-------|-------|----------|-------|--|----------|---------|
| cg04972459 | 1  | 9,460,204   | 1.19E-10 | 0.225 | 0.228 |          |       |  |          |         |
| cg22267770 | 6  | 10,422,139  | 0.001121 | 0.225 | 0.235 |          |       |  |          |         |
| cg10671668 | 12 | 4,919,230   | 0.013119 | 0.225 | 0.127 |          |       |  | KCNA6    | 1stExon |
| cg02426623 | 12 | 3,259,078   | 2.21E-17 | 0.225 | 0.204 |          |       |  | TSPAN9   | 5'UTR   |
| cg19577080 | 4  | 143,470,771 | 1.11E-07 | 0.225 | 0.207 |          |       |  | INPP4B   | 5'UTR   |
| cg22256027 | 4  | 4,863,016   | 3.08E-06 | 0.225 | 0.225 |          |       |  | MSX1     | Body    |
| cg06329735 | 11 | 75,139,390  | 0.021569 | 0.225 | 0.246 |          |       |  | KLHL35   | Body    |
| cg12686273 | 16 | 3,085,867   | 7.2E-11  | 0.225 | 0.234 |          |       |  | CCDC64B  | TSS1500 |
| cg16084857 | X  | 130,216,575 | 0.039532 | 0.225 | 0.164 |          |       |  | FLJ30058 | Body    |
| cg23432345 | 7  | 27,196,153  | 0.011985 | 0.225 | 0.189 | 5.51E-16 | 0.177 |  | HOXA7    | 1stExon |
| cg17842189 | 22 | 47,425,596  | 6.38E-10 | 0.225 | 0.225 |          |       |  | TBC1D22A | Body    |
| cg20626840 | 2  | 38,201,011  | 6.7E-06  | 0.225 | 0.216 |          |       |  | FAM82A1  | Body    |
| cg23197405 | 12 | 54,451,938  | 6.12E-11 | 0.225 | 0.200 |          |       |  | FLJ12825 | TSS200  |
| cg06039988 | 11 | 65,158,399  | 7.55E-09 | 0.225 | 0.203 |          |       |  | FRMD8    | Body    |
| cg09147777 | 11 | 105,480,771 | 0.00011  | 0.225 | 0.192 |          |       |  | GRIA4    | TSS200  |
| cg09828714 | 22 | 29,875,578  | 0.013865 | 0.225 | 0.290 |          |       |  | NEFH     | TSS1500 |
| cg17024482 | 17 | 54,230,730  | 1.87E-16 | 0.225 | 0.206 |          |       |  | ANKFN1   | TSS200  |
| cg18917486 | 15 | 74,093,431  | 4.74E-05 | 0.225 | 0.208 |          |       |  |          |         |
| cg23855319 | 4  | 2,062,392   | 0.000169 | 0.225 | 0.237 |          |       |  | NAT8L    | Body    |
| cg01654862 | 3  | 159,480,947 | 0.000806 | 0.225 | 0.217 |          |       |  | SCHIP1   | Body    |
| cg12931554 | 8  | 37,119,428  | 4.23E-07 | 0.225 | 0.211 |          |       |  |          |         |
| cg19514721 | 5  | 141,813,298 | 4.72E-13 | 0.225 | 0.206 |          |       |  |          |         |
| cg22637867 | 19 | 12,624,466  | 0.000393 | 0.225 | 0.227 |          |       |  | ZNF709   | 5'UTR   |
| cg04569615 | 11 | 20,622,198  | 0.000419 | 0.225 | 0.280 |          |       |  | SLC6A5   | Body    |
| cg05560472 | X  | 99,986,046  | 0.016024 | 0.225 | 0.261 |          |       |  | SYTL4    | 5'UTR   |
| cg15329133 | 5  | 135,467,951 | 1.72E-10 | 0.225 | 0.194 |          |       |  | SMAD5    | TSS1500 |
| cg18932968 | 11 | 102,576,469 | 2.28E-08 | 0.225 | 0.219 |          |       |  | MMP27    | TSS200  |
| cg19672546 | 8  | 145,025,123 | 4.39E-09 | 0.225 | 0.221 |          |       |  | PLEC1    | Body    |
| cg02495604 | 1  | 40,158,076  | 0.000208 | 0.225 | 0.235 |          |       |  | HPCAL4   | TSS1500 |
| cg03024720 | 8  | 9,765,601   | 2.81E-05 | 0.225 | 0.247 |          |       |  |          |         |
| cg07404485 | 7  | 94,953,653  | 8.77E-08 | 0.225 | 0.193 | 1.65E-15 | 0.159 |  | PON1     | Body    |
| cg16762684 | 18 | 74,820,493  | 0.007858 | 0.225 | 0.190 |          |       |  | MBP      | 5'UTR   |
| cg00537673 | 6  | 43,141,823  | 9.03E-15 | 0.225 | 0.199 |          |       |  | SRF      | Body    |
| cg10325497 | 1  | 32,739,049  | 1.65E-09 | 0.225 | 0.206 |          |       |  | LCK      | 5'UTR   |

|            |    |             |          |       |       |  |  |  |                |         |
|------------|----|-------------|----------|-------|-------|--|--|--|----------------|---------|
| cg22667178 | 13 | 44,947,976  | 0.005889 | 0.225 | 0.222 |  |  |  | <i>SERP2</i>   | TSS200  |
| cg22915945 | 8  | 24,151,625  | 1.81E-05 | 0.225 | 0.228 |  |  |  | <i>ADAM28</i>  | 1stExon |
| cg23554686 | X  | 40,122,371  | 8.85E-09 | 0.225 | 0.225 |  |  |  |                |         |
| cg24954895 | 5  | 140,800,761 | 0.004109 | 0.225 | 0.280 |  |  |  | <i>PCDHGA4</i> | Body    |
| cg08159989 | 1  | 205,326,071 | 3.55E-19 | 0.225 | 0.207 |  |  |  | <i>KLHDC8A</i> | TSS200  |
| cg09001939 | 2  | 11,810,534  | 0.002647 | 0.225 | 0.198 |  |  |  | <i>NTSR2</i>   | TSS1500 |
| cg19630681 | 3  | 64,429,607  | 5.17E-08 | 0.225 | 0.220 |  |  |  |                |         |
| cg06421774 | 5  | 2,066,690   | 0.003426 | 0.225 | 0.264 |  |  |  |                |         |
| cg20777398 | 6  | 28,956,244  | 5.3E-05  | 0.225 | 0.213 |  |  |  |                |         |
| cg19258425 | 3  | 181,428,280 | 3.8E-05  | 0.225 | 0.220 |  |  |  | <i>SOX2OT</i>  | Body    |
| cg00028308 | 12 | 54,090,754  | 1.87E-05 | 0.225 | 0.236 |  |  |  |                |         |
| cg10658307 | 11 | 95,071,108  | 3.12E-15 | 0.225 | 0.225 |  |  |  |                |         |
| cg07282889 | 15 | 89,912,141  | 0.01219  | 0.225 | 0.232 |  |  |  |                |         |
| cg13966575 | 8  | 127,592,341 | 6.33E-15 | 0.225 | 0.205 |  |  |  |                |         |
| cg17933493 | X  | 153,532,656 | 5.43E-14 | 0.225 | 0.218 |  |  |  | <i>TKTL1</i>   | TSS1500 |
| cg02080857 | 1  | 85,279,323  | 7.58E-05 | 0.225 | 0.212 |  |  |  | <i>LPAR3</i>   | 3'UTR   |
| cg03941587 | 4  | 123,747,634 | 2.2E-06  | 0.225 | 0.219 |  |  |  | <i>FGF2</i>    | TSS1500 |
| cg25688583 | 15 | 57,510,460  | 8.7E-06  | 0.225 | 0.245 |  |  |  | <i>TCF12</i>   | TSS1500 |
| cg01899676 | 12 | 106,988,413 | 1.85E-07 | 0.225 | 0.229 |  |  |  | <i>RFX4</i>    | Body    |
| cg26840437 | 5  | 1,851,071   | 4.83E-09 | 0.225 | 0.183 |  |  |  |                |         |
| cg27362525 | 17 | 5,019,638   | 0.016586 | 0.225 | 0.274 |  |  |  | <i>ZNF232</i>  | 5'UTR   |
| cg00961418 | 11 | 8,616,172   | 0.000191 | 0.225 | 0.181 |  |  |  | <i>STK33</i>   | TSS1500 |
| cg12539415 | 2  | 177,016,167 | 1.37E-06 | 0.225 | 0.193 |  |  |  | <i>HOXD4</i>   | 5'UTR   |
| cg04002794 | 3  | 171,805,805 | 1.32E-05 | 0.225 | 0.249 |  |  |  | <i>FNDC3B</i>  | 5'UTR   |
| cg09238992 | 10 | 23,484,228  | 0.003411 | 0.225 | 0.273 |  |  |  |                |         |
| cg16228323 | 10 | 43,818,243  | 0.032044 | 0.225 | 0.196 |  |  |  |                |         |
| cg27440150 | 22 | 24,561,080  | 5.55E-36 | 0.225 | 0.217 |  |  |  | <i>CABIN1</i>  | Body    |
| cg08179525 | 15 | 29,033,879  | 0.000305 | 0.225 | 0.236 |  |  |  |                |         |
| cg18850728 | 18 | 48,346,838  | 6.16E-11 | 0.225 | 0.213 |  |  |  | <i>MRO</i>     | TSS1500 |
| cg17739428 | 19 | 23,598,854  | 0.00795  | 0.225 | 0.139 |  |  |  |                |         |
| cg10588211 | 1  | 162,792,246 | 0.03166  | 0.225 | 0.351 |  |  |  |                |         |
| cg18944010 | 1  | 119,522,855 | 0.001211 | 0.225 | 0.267 |  |  |  | <i>TBX15</i>   | 5'UTR   |
| cg20813589 | 11 | 504,930     | 0.008648 | 0.225 | 0.193 |  |  |  | <i>RNH1</i>    | 5'UTR   |
| cg08661007 | 3  | 79,817,232  | 0.016963 | 0.225 | 0.267 |  |  |  | <i>ROBO1</i>   | TSS200  |

|            |    |             |          |       |       |         |       |     |                 |         |
|------------|----|-------------|----------|-------|-------|---------|-------|-----|-----------------|---------|
| cg08927016 | 7  | 156,796,145 | 0.00109  | 0.225 | 0.218 |         |       |     |                 |         |
| cg00181327 | 13 | 31,439,278  | 2.2E-10  | 0.225 | 0.219 |         |       |     |                 |         |
| cg22969524 | 17 | 41,909,716  | 1.29E-05 | 0.225 | 0.201 |         |       |     | <i>MPP3</i>     | 5'UTR   |
| cg26704293 | 12 | 125,073,750 | 6.83E-06 | 0.225 | 0.213 |         |       |     |                 |         |
| cg06008926 | 5  | 170,740,673 | 0.021749 | 0.225 | 0.300 |         |       |     |                 |         |
| cg13459217 | 1  | 205,326,437 | 1.56E-13 | 0.225 | 0.233 |         |       |     | <i>KLHDC8A</i>  | TSS1500 |
| cg15829654 | 6  | 108,482,863 | 0.001647 | 0.225 | 0.256 |         |       |     |                 |         |
| cg01375263 | X  | 57,163,746  | 2.77E-07 | 0.225 | 0.210 |         |       |     | <i>SPIN2A</i>   | 5'UTR   |
| cg09380805 | 3  | 169,384,034 | 9.88E-07 | 0.225 | 0.220 |         |       |     |                 |         |
| cg09777237 | 7  | 73,445,236  | 2.35E-15 | 0.225 | 0.212 |         |       |     | <i>ELN</i>      | Body    |
| cg15821319 | 20 | 37,434,158  | 0.000255 | 0.225 | 0.145 |         |       |     | <i>PPP1R16B</i> | TSS200  |
| cg02441765 | 13 | 33,590,838  | 0.003779 | 0.225 | 0.126 |         |       |     | <i>KL</i>       | 1stExon |
| cg09308580 | 2  | 43,405,947  | 0.001813 | 0.225 | 0.233 |         |       |     |                 |         |
| cg15247509 | 10 | 48,416,977  | 1.28E-08 | 0.225 | 0.236 |         |       |     | <i>GDF2</i>     | TSS200  |
| cg20921890 | 18 | 19,753,208  | 7.7E-14  | 0.225 | 0.206 |         |       |     | <i>GATA6</i>    | Body    |
| cg14157107 | 9  | 16,704,404  | 2.8E-07  | 0.225 | 0.210 |         |       |     | <i>BNC2</i>     | Body    |
| cg27119919 | 11 | 60,684,332  | 3.61E-07 | 0.225 | 0.199 |         |       |     | <i>TMEM109</i>  | 5'UTR   |
| cg07649862 | 16 | 88,897,202  | 4.97E-44 | 0.225 | 0.220 |         |       |     | <i>GALNS</i>    | Body    |
| cg17203647 | 8  | 25,897,201  | 1.65E-05 | 0.225 | 0.210 |         |       |     | <i>EBF2</i>     | Body    |
| cg20168806 | 6  | 10,382,828  | 0.007146 | 0.225 | 0.245 |         |       |     |                 |         |
| cg01330221 | 4  | 57,522,689  | 0.030381 | 0.225 | 0.243 |         |       | Yes | <i>HOPX</i>     | 5'UTR   |
| cg24023258 | 8  | 143,781,297 | 4.46E-11 | 0.225 | 0.227 |         |       |     | <i>LY6K</i>     | TSS1500 |
| cg16973098 | 13 | 95,359,203  | 0.004281 | 0.225 | 0.180 |         |       |     |                 |         |
| cg00468380 | 8  | 11,549,521  | 6.27E-05 | 0.225 | 0.223 |         |       |     |                 |         |
| cg17838420 | 5  | 1,877,906   | 4.02E-09 | 0.225 | 0.204 |         |       |     | <i>IRX4</i>     | 3'UTR   |
| cg06872964 | 1  | 79,085,250  | 0.003033 | 0.225 | 0.196 |         |       |     | <i>IFI44L</i>   | TSS1500 |
| cg07162085 | 10 | 95,751,894  | 0.000162 | 0.225 | 0.242 |         |       |     |                 |         |
| cg10078829 | 19 | 51,415,452  | 2.13E-07 | 0.225 | 0.226 |         |       |     | <i>KLK4</i>     | TSS1500 |
| cg23214071 | 6  | 32,627,784  | 0.022335 | 0.225 | 0.151 |         |       | Yes | <i>HLA-DQB1</i> | 3'UTR   |
| cg04586332 | 22 | 45,659,810  | 0.020646 | 0.225 | 0.246 |         |       |     |                 |         |
| cg13303358 | 1  | 245,644,687 | 1.44E-06 | 0.225 | 0.172 |         |       |     | <i>KIF26B</i>   | Body    |
| cg16166968 | 1  | 120,439,036 | 5.07E-08 | 0.225 | 0.237 |         |       |     | <i>ADAM30</i>   | 1stExon |
| cg01443452 | 19 | 36,024,439  | 4.26E-10 | 0.225 | 0.214 | 2.8E-08 | 0.096 |     | <i>GAPDHS</i>   | 1stExon |
| cg06631160 | 16 | 29,086,456  | 0.000122 | 0.225 | 0.151 |         |       |     | <i>RRN3P2</i>   | Body    |

|            |    |             |          |       |       |          |       |     |                 |         |
|------------|----|-------------|----------|-------|-------|----------|-------|-----|-----------------|---------|
| cg23413506 | 20 | 3,218,579   | 6.77E-17 | 0.225 | 0.207 |          |       |     | <i>SLC4A11</i>  | TSS1500 |
| cg23771366 | 11 | 86,510,998  | 0.000589 | 0.225 | 0.127 |          |       |     | <i>PRSS23</i>   | TSS1500 |
| cg24014143 | 13 | 70,682,127  | 0.019902 | 0.225 | 0.269 |          |       |     | <i>KLHL1</i>    | 1stExon |
| cg04602747 | 6  | 118,273,169 | 0.041625 | 0.225 | 0.050 |          |       |     | <i>SLC35F1</i>  | Body    |
| cg13790353 | 11 | 85,565,559  | 0.012126 | 0.225 | 0.170 |          |       |     | <i>CCDC83</i>   | TSS1500 |
| cg14701491 | 3  | 127,634,449 | 0.040867 | 0.225 | 0.203 |          |       |     |                 |         |
| cg17104824 | 2  | 177,014,959 | 9.03E-07 | 0.225 | 0.173 |          |       |     | <i>HOXD4</i>    | TSS1500 |
| cg07180458 | 1  | 19,600,912  | 0.002514 | 0.225 | 0.163 |          |       |     | <i>AKR7L</i>    | TSS1500 |
| cg06530441 | 22 | 51,016,950  | 3.17E-08 | 0.225 | 0.237 |          |       |     | <i>CPT1B</i>    | TSS200  |
| cg07167423 | 1  | 36,042,986  | 1.47E-05 | 0.225 | 0.226 |          |       |     | <i>TFAP2E</i>   | Body    |
| cg07138399 | 1  | 200,272,215 | 1.43E-05 | 0.225 | 0.198 |          |       |     |                 |         |
| cg03555299 | 2  | 206,830,681 | 0.000126 | 0.225 | 0.223 |          |       |     |                 |         |
| cg13223107 | 6  | 50,810,715  | 9.92E-05 | 0.225 | 0.248 |          |       |     | <i>TFAP2B</i>   | Body    |
| cg17941572 | 1  | 63,784,454  | 0.00491  | 0.225 | 0.247 |          |       |     |                 |         |
| cg23088510 | 10 | 126,428,199 | 0.00033  | 0.225 | 0.219 |          |       |     | <i>FAM53B</i>   | 5'UTR   |
| cg01300341 | 6  | 137,311,021 | 0.000789 | 0.225 | 0.151 |          |       |     | <i>NHEG1</i>    | Body    |
| cg27326452 | 3  | 138,668,931 | 0.036772 | 0.225 | 0.223 |          |       |     | <i>C3orf72</i>  | Body    |
| cg06511312 | 1  | 3,459,949   | 0.003002 | 0.225 | 0.189 |          |       | Yes | <i>MEGF6</i>    | Body    |
| cg07489048 | 14 | 29,236,898  | 0.000274 | 0.225 | 0.268 |          |       |     | <i>FOXP1</i>    | 1stExon |
| cg15165122 | 2  | 71,206,291  | 3.5E-06  | 0.225 | 0.210 |          |       |     | <i>ANKRD53</i>  | Body    |
| cg13971892 | 5  | 146,258,512 | 0.022139 | 0.225 | 0.208 |          |       |     | <i>PPP2R2B</i>  | TSS200  |
| cg01624571 | 15 | 67,417,697  | 8.6E-11  | 0.225 | 0.201 |          |       |     | <i>SMAD3</i>    | Body    |
| cg04569429 | 17 | 37,024,625  | 2.02E-05 | 0.225 | 0.235 |          |       |     | <i>LASP1</i>    | TSS1500 |
| cg05048976 | 3  | 55,516,243  | 0.000113 | 0.225 | 0.189 |          |       |     | <i>WNT5A</i>    | Body    |
| cg05346256 | 12 | 25,959,372  | 2.67E-06 | 0.225 | 0.234 |          |       |     |                 |         |
| cg07545037 | 12 | 54,423,920  | 2.75E-10 | 0.225 | 0.193 |          |       |     | <i>HOXC4</i>    | 5'UTR   |
| cg10184289 | 2  | 64,870,490  | 1.72E-06 | 0.225 | 0.196 |          |       |     | <i>SERTAD2</i>  | 5'UTR   |
| cg22660542 | 12 | 54,402,431  | 5.17E-05 | 0.225 | 0.195 |          |       |     | <i>HOXC8</i>    | TSS1500 |
| cg11772661 | 10 | 118,765,335 | 0.011263 | 0.225 | 0.111 |          |       |     | <i>KIAA1598</i> | TSS1500 |
| cg23713520 | 16 | 57,318,087  | 1.72E-05 | 0.225 | 0.185 | 3.03E-13 | 0.180 |     | <i>PLLP</i>     | Body    |
| cg02725065 | 15 | 101,718,610 | 4.14E-07 | 0.225 | 0.212 |          |       |     | <i>CHSY1</i>    | Body    |
| cg01476969 | 19 | 719,323     | 3.72E-13 | 0.225 | 0.215 |          |       |     | <i>PALM</i>     | Body    |
| cg17280106 | 17 | 77,767,084  | 5.99E-06 | 0.225 | 0.260 |          |       |     |                 |         |
| cg18273417 | 1  | 153,518,418 | 2.86E-09 | 0.225 | 0.227 |          |       |     | <i>S100A4</i>   | TSS200  |

|            |    |             |          |       |       |          |       |     |  |                 |         |
|------------|----|-------------|----------|-------|-------|----------|-------|-----|--|-----------------|---------|
| cg13876325 | 17 | 16,190,098  | 2.02E-07 | 0.225 | 0.225 |          |       |     |  | <i>PIGL</i>     | Body    |
| cg15268136 | 1  | 44,031,309  | 8.82E-06 | 0.225 | 0.230 |          |       |     |  | <i>PTPRF</i>    | Body    |
| cg20989443 | 1  | 230,301,268 | 9.23E-19 | 0.225 | 0.216 |          |       |     |  | <i>GALNT2</i>   | Body    |
| cg04367197 | 11 | 13,300,320  | 0.007626 | 0.225 | 0.146 |          |       |     |  | <i>ARNTL</i>    | 5'UTR   |
| cg11089595 | 8  | 85,094,437  | 0.006789 | 0.225 | 0.184 |          |       |     |  | <i>RALYL</i>    | TSS1500 |
| cg17328631 | 3  | 124,609,514 | 1.34E-07 | 0.225 | 0.213 |          |       |     |  |                 |         |
| cg14018429 | 9  | 129,138,146 | 6.51E-14 | 0.225 | 0.219 |          |       |     |  | <i>FAM125B</i>  | Body    |
| cg22825644 | 7  | 29,186,347  | 0.001964 | 0.225 | 0.226 |          |       |     |  | <i>CPVL</i>     | TSS200  |
| cg18397450 | 14 | 105,830,631 | 0.04818  | 0.225 | 0.104 |          |       |     |  | <i>PACS2</i>    | Body    |
| cg09566763 | 17 | 7,553,760   | 0.002561 | 0.225 | 0.208 |          |       |     |  | <i>ATP1B2</i>   | TSS1500 |
| cg17693604 | 19 | 3,046,805   | 4.12E-23 | 0.225 | 0.215 |          |       |     |  | <i>TLE2</i>     | 5'UTR   |
| cg00008629 | 9  | 115,093,661 | 2.85E-10 | 0.225 | 0.208 |          |       |     |  | <i>ROD1</i>     | Body    |
| cg06891491 | X  | 134,429,749 | 1.63E-05 | 0.225 | 0.211 |          |       |     |  | <i>ZNF75D</i>   | 5'UTR   |
| cg06901711 | 1  | 146,649,635 | 0.018804 | 0.225 | 0.199 |          |       |     |  | <i>PDIA3P</i>   | Body    |
| cg14331316 | 9  | 99,139,396  | 1.92E-07 | 0.225 | 0.210 |          |       |     |  | <i>SLC35D2</i>  | Body    |
| cg19944876 | 17 | 8,905,866   | 5.59E-05 | 0.225 | 0.211 |          |       |     |  |                 |         |
| cg27319216 | 8  | 6,693,540   | 5.09E-09 | 0.225 | 0.225 |          |       |     |  | <i>XKR5</i>     | TSS1500 |
| cg27417609 | 16 | 68,676,806  | 6.46E-06 | 0.225 | 0.198 |          |       |     |  | <i>CDH3</i>     | TSS1500 |
| cg02197277 | 16 | 21,245,235  | 1.38E-08 | 0.225 | 0.195 |          |       |     |  | <i>ANKS4B</i>   | Body    |
| cg16232126 | 2  | 108,603,005 | 0.01482  | 0.225 | 0.195 | 6.25E-17 | 0.183 |     |  | <i>SLC5A7</i>   | 1stExon |
| cg22083053 | 4  | 13,541,444  | 0.022967 | 0.225 | 0.264 |          |       |     |  |                 |         |
| cg27149973 | 17 | 74,868,725  | 2.89E-09 | 0.225 | 0.239 |          |       |     |  | <i>MGAT5B</i>   | Body    |
| cg17063780 | 12 | 103,816,811 | 0.000325 | 0.225 | 0.184 |          |       |     |  | <i>C12orf42</i> | Body    |
| cg24211908 | 17 | 72,443,401  | 3.68E-05 | 0.225 | 0.251 |          |       |     |  | <i>GPRC5C</i>   | 3'UTR   |
| cg06616245 | 12 | 57,854,236  | 3.19E-06 | 0.225 | 0.183 | 2.9E-13  | 0.061 |     |  | <i>GLI1</i>     | 5'UTR   |
| cg24451872 | 1  | 32,177,995  | 6.34E-05 | 0.225 | 0.240 |          |       | Yes |  |                 |         |
| cg18147366 | 1  | 207,669,544 | 0.000468 | 0.225 | 0.271 |          |       |     |  | <i>CR1</i>      | 5'UTR   |
| cg18736448 | 8  | 134,087,171 | 0.00029  | 0.225 | 0.237 |          |       |     |  | <i>TG</i>       | Body    |
| cg09580336 | 1  | 116,915,122 | 0.003831 | 0.225 | 0.178 | 2.22E-14 | 0.104 |     |  | <i>ATP1A1</i>   | TSS1500 |
| cg10508317 | 17 | 76,355,146  | 0.000233 | 0.225 | 0.225 |          |       |     |  | <i>SOCS3</i>    | Body    |
| cg18481230 | 2  | 155,555,347 | 0.018939 | 0.225 | 0.255 |          |       |     |  | <i>KCNJ3</i>    | 1stExon |
| cg12691631 | 4  | 23,891,835  | 0.043393 | 0.225 | 0.283 |          |       |     |  | <i>PPARGC1A</i> | TSS200  |
| cg13710969 | 17 | 79,393,463  | 0.000774 | 0.225 | 0.083 |          |       |     |  | <i>BAHCC1</i>   | Body    |
| cg08062822 | X  | 103,356,845 | 0.016599 | 0.225 | 0.105 |          |       |     |  | <i>MCART6</i>   | 5'UTR   |

|            |    |             |          |       |       |  |  |  |                   |         |
|------------|----|-------------|----------|-------|-------|--|--|--|-------------------|---------|
| cg03602029 | 6  | 137,814,078 | 7.23E-05 | 0.225 | 0.242 |  |  |  | <i>OLIG3</i>      | 1stExon |
| cg15440661 | 2  | 43,395,871  | 8.64E-16 | 0.225 | 0.229 |  |  |  |                   |         |
| cg19620724 | 6  | 50,810,852  | 0.001049 | 0.225 | 0.249 |  |  |  | <i>TFAP2B</i>     | Body    |
| cg14050053 | 17 | 33,416,834  | 4.31E-07 | 0.225 | 0.190 |  |  |  | <i>RFFL</i>       | TSS1500 |
| cg14686919 | 20 | 61,584,159  | 0.000122 | 0.225 | 0.193 |  |  |  | <i>SLC17A9</i>    | 1stExon |
| cg02994246 | 1  | 21,587,174  | 7.77E-12 | 0.225 | 0.209 |  |  |  | <i>ECE1</i>       | Body    |
| cg11605835 | 5  | 3,597,695   | 0.004652 | 0.225 | 0.262 |  |  |  | <i>IRX1</i>       | Body    |
| cg20547575 | 7  | 69,065,351  | 0.008275 | 0.225 | 0.135 |  |  |  | <i>AUTS2</i>      | Body    |
| cg13679772 | 14 | 89,933,549  | 4.95E-07 | 0.225 | 0.195 |  |  |  | <i>FOXN3</i>      | 5'UTR   |
| cg10497692 | 1  | 21,996,199  | 0.018514 | 0.225 | 0.155 |  |  |  | <i>RAP1GAP</i>    | TSS1500 |
| cg12902206 | 3  | 52,351,487  | 1.97E-06 | 0.225 | 0.251 |  |  |  | <i>DNAH1</i>      | 5'UTR   |
| cg14704669 | 10 | 32,046,612  | 6.1E-20  | 0.225 | 0.226 |  |  |  |                   |         |
| cg11858226 | 7  | 2,548,262   | 0.003104 | 0.225 | 0.226 |  |  |  |                   |         |
| cg17856063 | 1  | 146,543,992 | 9.16E-10 | 0.225 | 0.191 |  |  |  |                   |         |
| cg21371809 | 10 | 14,052,028  | 0.000262 | 0.225 | 0.176 |  |  |  | <i>FRMD4A</i>     | Body    |
| cg04457317 | 3  | 50,567,932  | 0.001429 | 0.224 | 0.202 |  |  |  |                   |         |
| cg09171882 | 12 | 75,874,499  | 0.02402  | 0.224 | 0.299 |  |  |  | <i>GLIPR1</i>     | TSS200  |
| cg11604182 | 5  | 177,433,673 | 0.000162 | 0.224 | 0.236 |  |  |  |                   |         |
| cg24993576 | 6  | 168,502,767 | 1.77E-05 | 0.224 | 0.214 |  |  |  |                   |         |
| cg13251484 | 14 | 74,180,217  | 0.004694 | 0.224 | 0.180 |  |  |  | <i>PNMA1</i>      | 1stExon |
| cg21092808 | 2  | 177,029,850 | 0.000992 | 0.224 | 0.207 |  |  |  | <i>HOXD3</i>      | 5'UTR   |
| cg07056299 | 7  | 73,393,148  | 1.79E-09 | 0.224 | 0.220 |  |  |  |                   |         |
| cg15017278 | 16 | 127,449     | 0.004581 | 0.224 | 0.153 |  |  |  | <i>MPG</i>        | 5'UTR   |
| cg16297569 | 1  | 92,952,517  | 0.000188 | 0.224 | 0.183 |  |  |  | <i>GFI1</i>       | TSS1500 |
| cg25577212 | 7  | 24,740,509  | 2.6E-09  | 0.224 | 0.230 |  |  |  | <i>DFNA5</i>      | Body    |
| cg06399427 | 2  | 161,504,772 | 0.002093 | 0.224 | 0.169 |  |  |  |                   |         |
| cg09261593 | 1  | 2,058,612   | 2.76E-12 | 0.224 | 0.212 |  |  |  | <i>PRKCZ</i>      | 5'UTR   |
| cg15269394 | 17 | 40,672,083  | 2.42E-09 | 0.224 | 0.224 |  |  |  | <i>ATP6VOA1</i>   | Body    |
| cg17988320 | 7  | 30,361,459  | 1.46E-09 | 0.224 | 0.201 |  |  |  | <i>ZNRF2</i>      | Body    |
| cg09103619 | 15 | 79,575,048  | 0.045997 | 0.224 | 0.211 |  |  |  | <i>ANKRD34C</i>   | TSS200  |
| cg02762440 | 5  | 71,014,792  | 1.93E-08 | 0.224 | 0.215 |  |  |  | <i>CARTPT</i>     | TSS200  |
| cg04551619 | 1  | 10,692,799  | 1.7E-28  | 0.224 | 0.243 |  |  |  |                   |         |
| cg06386478 | 8  | 19,460,136  | 0.000359 | 0.224 | 0.201 |  |  |  | <i>CSGALNACT1</i> | TSS200  |
| cg06473276 | 6  | 39,399,221  | 0.002119 | 0.224 | 0.174 |  |  |  | <i>KIF6</i>       | Body    |

|            |    |             |          |       |       |          |       |     |                 |         |
|------------|----|-------------|----------|-------|-------|----------|-------|-----|-----------------|---------|
| cg23851027 | 19 | 51,857,538  | 4.37E-06 | 0.224 | 0.174 |          |       |     | <i>ETFB</i>     | 1stExon |
| cg10069809 | 2  | 45,028,604  | 5.38E-07 | 0.224 | 0.224 |          |       |     |                 |         |
| cg24472823 | 7  | 51,296,131  | 1.39E-12 | 0.224 | 0.236 |          |       |     | <i>COBL</i>     | Body    |
| cg27423216 | 12 | 5,543,269   | 0.000157 | 0.224 | 0.226 |          |       |     | <i>NTF3</i>     | Body    |
| cg04464085 | 6  | 30,923,327  | 0.014043 | 0.224 | 0.291 |          |       |     |                 |         |
| cg19201009 | 10 | 99,475,406  | 4.67E-23 | 0.224 | 0.212 |          |       |     | <i>MARVELD1</i> | Body    |
| cg25174438 | 4  | 85,403,915  | 0.000187 | 0.224 | 0.235 |          |       |     |                 |         |
| cg09473359 | 13 | 24,477,933  | 4.07E-11 | 0.224 | 0.227 |          |       |     |                 |         |
| cg26923410 | 7  | 30,951,432  | 9.46E-05 | 0.224 | 0.175 |          |       |     | <i>AQP1</i>     | TSS200  |
| cg04309093 | 14 | 92,980,608  | 0.00427  | 0.224 | 0.152 |          |       |     | <i>RIN3</i>     | Body    |
| cg17299456 | 11 | 10,696,311  | 0.001177 | 0.224 | 0.231 |          |       |     | <i>MRVI1</i>    | 5'UTR   |
| cg22460123 | 12 | 52,638,294  | 9.91E-13 | 0.224 | 0.198 |          |       |     | <i>KRT7</i>     | Body    |
| cg00868523 | 19 | 54,387,036  | 0.002952 | 0.224 | 0.277 |          |       |     | <i>PRKCG</i>    | Body    |
| cg02858132 | 3  | 136,469,005 | 1.74E-12 | 0.224 | 0.244 |          |       |     | <i>STAG1</i>    | 5'UTR   |
| cg12845268 | 10 | 63,657,363  | 1.59E-09 | 0.224 | 0.191 |          |       |     |                 |         |
| cg15559833 | 2  | 218,829,609 | 0.005994 | 0.224 | 0.195 |          |       | Yes |                 |         |
| cg08461692 | 17 | 8,481,454   | 5.37E-13 | 0.224 | 0.197 |          |       |     | <i>MYH10</i>    | Body    |
| cg09100338 | 8  | 48,676,054  | 0.005036 | 0.224 | 0.172 |          |       |     |                 |         |
| cg14176930 | 6  | 10,884,891  | 2.02E-06 | 0.224 | 0.247 |          |       |     |                 |         |
| cg18652721 | 5  | 2,754,074   | 0.043891 | 0.224 | 0.204 |          |       |     | <i>C5orf38</i>  | Body    |
| cg09267051 | 7  | 100,943,468 | 0.015001 | 0.224 | 0.216 |          |       |     |                 |         |
| cg17651821 | 6  | 27,841,683  | 0.017727 | 0.224 | 0.235 | 4.36E-11 | 0.178 |     | <i>HIST1H4L</i> | TSS1500 |
| cg25751198 | 12 | 109,729,573 | 0.00375  | 0.224 | 0.172 |          |       |     | <i>FOXN4</i>    | Body    |
| cg04792712 | 8  | 17,271,105  | 0.001121 | 0.224 | 0.154 |          |       |     | <i>MTMR7</i>    | TSS200  |
| cg05416911 | 12 | 7,176,049   | 5.33E-05 | 0.224 | 0.211 |          |       |     | <i>C1S</i>      | Body    |
| cg09387749 | 2  | 177,028,680 | 0.030618 | 0.224 | 0.227 |          |       |     | <i>HOXD3</i>    | TSS200  |
| cg13985437 | 11 | 76,381,044  | 3.58E-07 | 0.224 | 0.200 |          |       |     | <i>LRRC32</i>   | 5'UTR   |
| cg15854394 | 8  | 22,769,830  | 2.58E-09 | 0.224 | 0.201 |          |       |     | <i>PEBP4</i>    | Body    |
| cg23419907 | 2  | 220,154,319 | 1.45E-10 | 0.224 | 0.206 |          |       |     |                 |         |
| cg13604794 | 17 | 48,050,338  | 3.1E-06  | 0.224 | 0.224 |          |       |     | <i>DLX4</i>     | Body    |
| cg14594111 | 9  | 124,463,457 | 6.55E-13 | 0.224 | 0.200 |          |       | Yes | <i>DAB2IP</i>   | Body    |
| cg18145937 | 5  | 132,010,740 | 1.83E-20 | 0.224 | 0.243 |          |       |     | <i>IL4</i>      | Body    |
| cg14726637 | 1  | 207,669,308 | 1.82E-06 | 0.224 | 0.211 | 1.72E-20 | 0.202 |     | <i>CR1</i>      | TSS200  |
| cg18455523 | 3  | 24,563,685  | 0.000414 | 0.224 | 0.153 |          |       |     |                 |         |

|            |    |             |          |       |       |          |       |  |          |         |
|------------|----|-------------|----------|-------|-------|----------|-------|--|----------|---------|
| cg22871653 | 1  | 119,535,817 | 0.013534 | 0.224 | 0.227 |          |       |  |          |         |
| cg27345924 | 5  | 2,727,758   | 0.002649 | 0.224 | 0.252 |          |       |  |          |         |
| cg01558110 | 22 | 50,607,681  | 4.99E-21 | 0.224 | 0.237 |          |       |  | PANX2    | TSS1500 |
| cg07519536 | 6  | 26,501,950  | 0.012806 | 0.224 | 0.207 |          |       |  | BTN1A1   | Body    |
| cg27560864 | 11 | 118,024,339 | 6.41E-10 | 0.224 | 0.209 | 3.1E-19  | 0.140 |  | SCN4B    | TSS1500 |
| cg15885672 | 17 | 59,488,116  | 8.07E-06 | 0.224 | 0.212 |          |       |  | C17orf82 | TSS1500 |
| cg27264462 | 1  | 2,106,365   | 5.14E-05 | 0.224 | 0.260 |          |       |  | PRKCZ    | Body    |
| cg17864646 | 17 | 80,297,148  | 1.17E-07 | 0.224 | 0.243 |          |       |  |          |         |
| cg26343958 | 12 | 5,539,662   | 0.000734 | 0.224 | 0.249 |          |       |  |          |         |
| cg10237817 | 1  | 154,519,846 | 2.15E-07 | 0.224 | 0.223 |          |       |  | TDRD10   | Body    |
| cg02172819 | 10 | 79,261,503  | 1.53E-07 | 0.224 | 0.209 |          |       |  | KCNMA1   | Body    |
| cg03810479 | X  | 38,666,254  | 2.64E-12 | 0.224 | 0.212 |          |       |  |          |         |
| cg12111714 | 13 | 26,043,472  | 0.002845 | 0.224 | 0.190 | 3.1E-11  | 0.179 |  | ATP8A2   | Body    |
| cg14096207 | 1  | 223,407,010 | 5.25E-05 | 0.224 | 0.248 |          |       |  | SUSD4    | Body    |
| cg24569492 | 2  | 66,808,811  | 0.011121 | 0.224 | 0.239 |          |       |  |          |         |
| cg08368875 | 10 | 134,334,241 | 5.78E-09 | 0.224 | 0.237 |          |       |  |          |         |
| cg22598426 | 4  | 85,417,755  | 1.79E-07 | 0.224 | 0.207 |          |       |  | NKX6-1   | Body    |
| cg23097006 | 20 | 25,063,817  | 0.009489 | 0.224 | 0.321 | 1.67E-11 | 0.174 |  | VSX1     | TSS1500 |
| cg02117721 | 4  | 74,702,421  | 0.002768 | 0.224 | 0.082 |          |       |  | CXCL6    | 5'UTR   |
| cg06615445 | 17 | 36,759,100  | 9.38E-13 | 0.224 | 0.213 |          |       |  | SRCIN1   | Body    |
| cg18055467 | 9  | 129,384,767 | 1.82E-06 | 0.224 | 0.222 |          |       |  | LMX1B    | Body    |
| cg21814178 | 12 | 51,720,755  | 6.7E-06  | 0.224 | 0.226 |          |       |  |          |         |
| cg27148800 | 16 | 54,325,929  | 1.34E-06 | 0.224 | 0.187 |          |       |  |          |         |
| cg04566677 | 12 | 54,779,175  | 1.19E-09 | 0.224 | 0.211 |          |       |  | ZNF385A  | Body    |
| cg26256223 | 8  | 145,106,582 | 1.46E-05 | 0.224 | 0.226 |          |       |  | OPLAH    | Body    |
| cg11731868 | 17 | 7,344,050   | 0.039674 | 0.224 | 0.289 |          |       |  | FGF11    | Body    |
| cg21831931 | 3  | 5,137,953   | 0.009143 | 0.224 | 0.222 |          |       |  |          |         |
| cg21940308 | 1  | 167,766,195 | 8.65E-07 | 0.224 | 0.202 |          |       |  |          |         |
| cg19403534 | 10 | 120,355,419 | 0.00058  | 0.224 | 0.229 |          |       |  | PRLHR    | TSS1500 |
| cg26546537 | 8  | 122,651,555 | 0.015185 | 0.224 | 0.248 |          |       |  | HAS2     | 5'UTR   |
| cg10366797 | 12 | 54,441,509  | 6.64E-08 | 0.224 | 0.207 |          |       |  | HOXC4    | 5'UTR   |
| cg22540514 | 8  | 41,050,652  | 1.07E-09 | 0.224 | 0.213 |          |       |  |          |         |
| cg01919377 | 12 | 5,539,832   | 0.011762 | 0.224 | 0.238 |          |       |  | NTF3     | TSS1500 |
| cg06405341 | 17 | 63,535,223  | 2.5E-14  | 0.224 | 0.223 |          |       |  | AXIN2    | Body    |



|            |    |             |          |       |       |          |       |  |                 |         |
|------------|----|-------------|----------|-------|-------|----------|-------|--|-----------------|---------|
| cg07213414 | 16 | 23,153,611  | 1.97E-24 | 0.224 | 0.227 |          |       |  | <i>USP31</i>    | Body    |
| cg09682051 | 11 | 128,813,008 | 0.008165 | 0.224 | 0.130 |          |       |  | <i>TP53AIP1</i> | TSS200  |
| cg09694921 | 11 | 126,215,608 | 1.49E-13 | 0.224 | 0.201 |          |       |  | <i>DCPS</i>     | 3'UTR   |
| cg09773769 | X  | 132,547,387 | 2.59E-12 | 0.224 | 0.187 |          |       |  | <i>GPC4</i>     | Body    |
| cg17071855 | 17 | 3,819,880   | 8.07E-07 | 0.224 | 0.223 |          |       |  | <i>P2RX1</i>    | 1stExon |
| cg03602233 | 16 | 75,144,040  | 7.37E-12 | 0.224 | 0.212 |          |       |  | <i>ZNRF1</i>    | 3'UTR   |
| cg08819022 | 22 | 18,531,447  | 1.01E-12 | 0.224 | 0.217 |          |       |  |                 |         |
| cg09094355 | X  | 3,632,358   | 0.002705 | 0.224 | 0.172 |          |       |  | <i>PRKX</i>     | TSS1500 |
| cg25638611 | 11 | 70,508,420  | 5.88E-09 | 0.224 | 0.217 |          |       |  | <i>SHANK2</i>   | Body    |
| cg21199165 | 2  | 45,166,884  | 8.44E-07 | 0.224 | 0.209 |          |       |  |                 |         |
| cg23926436 | 17 | 12,133,847  | 4.33E-07 | 0.224 | 0.159 |          |       |  |                 |         |
| cg00209038 | 2  | 48,982,683  | 0.025315 | 0.224 | 0.313 |          |       |  | <i>LHCGR</i>    | 1stExon |
| cg08250880 | 11 | 86,526,022  | 0.000834 | 0.224 | 0.167 |          |       |  |                 |         |
| cg14409032 | 9  | 129,445,219 | 0.000183 | 0.224 | 0.195 |          |       |  | <i>LMX1B</i>    | Body    |
| cg20207763 | 10 | 13,392,088  | 0.004631 | 0.224 | 0.171 |          |       |  |                 |         |
| cg00232453 | 6  | 31,864,574  | 1.11E-10 | 0.224 | 0.209 |          |       |  | <i>EHMT2</i>    | Body    |
| cg03239925 | 18 | 77,230,795  | 3.65E-10 | 0.224 | 0.218 |          |       |  | <i>NFATC1</i>   | Body    |
| cg22023627 | 8  | 20,125,819  | 1.11E-14 | 0.224 | 0.226 |          |       |  |                 |         |
| cg24144574 | 7  | 653,445     | 5.37E-07 | 0.224 | 0.219 |          |       |  | <i>PRKAR1B</i>  | Body    |
| cg01893695 | 14 | 77,370,443  | 7E-11    | 0.224 | 0.227 |          |       |  |                 |         |
| cg21100518 | 6  | 29,595,002  | 5.13E-08 | 0.224 | 0.226 |          |       |  | <i>GABBR1</i>   | Body    |
| cg11907729 | 6  | 55,443,757  | 0.026499 | 0.224 | 0.285 |          |       |  | <i>HMGCLL1</i>  | 1stExon |
| cg02360514 | 19 | 45,975,990  | 2.81E-11 | 0.224 | 0.189 |          |       |  | <i>FOSB</i>     | Body    |
| cg18504989 | 19 | 46,286,198  | 6.7E-06  | 0.224 | 0.235 |          |       |  | <i>DMPK</i>     | TSS1500 |
| cg22331740 | 19 | 48,983,508  | 4.92E-13 | 0.224 | 0.226 |          |       |  | <i>CYTH2</i>    | 3'UTR   |
| cg04838832 | 10 | 72,502,473  | 0.00319  | 0.224 | 0.230 |          |       |  | <i>ADAMTS14</i> | Body    |
| cg05668853 | 17 | 27,044,169  | 0.000222 | 0.224 | 0.245 | 2.48E-22 | 0.165 |  | <i>RAB34</i>    | Body    |
| cg24659328 | 3  | 58,563,666  | 1.97E-08 | 0.224 | 0.246 |          |       |  | <i>FAM107A</i>  | TSS200  |
| cg06098693 | 11 | 70,002,283  | 6.27E-08 | 0.224 | 0.204 |          |       |  | <i>ANO1</i>     | Body    |
| cg13577628 | 1  | 119,534,899 | 0.004377 | 0.224 | 0.187 |          |       |  |                 |         |
| cg04054731 | 22 | 21,386,798  | 0.034902 | 0.224 | 0.081 |          |       |  | <i>SLC7A4</i>   | 5'UTR   |
| cg19615017 | 3  | 30,673,459  | 4.11E-19 | 0.224 | 0.222 |          |       |  | <i>TGFBR2</i>   | Body    |
| cg20196291 | 10 | 116,164,849 | 1.79E-08 | 0.224 | 0.168 |          |       |  | <i>AFAP1L2</i>  | TSS1500 |
| cg00208504 | 4  | 140,200,520 | 0.014417 | 0.224 | 0.147 |          |       |  | <i>C4orf49</i>  | Body    |

|            |    |             |          |       |       |          |       |     |                  |         |
|------------|----|-------------|----------|-------|-------|----------|-------|-----|------------------|---------|
| cg00961517 | 10 | 24,491,007  | 1.33E-05 | 0.224 | 0.223 |          |       |     | <i>KIAA1217</i>  | 5'UTR   |
| cg22065923 | 22 | 30,938,383  | 0.01214  | 0.224 | 0.179 |          |       |     |                  |         |
| cg05228404 | 10 | 125,851,279 | 0.000886 | 0.224 | 0.279 |          |       |     |                  |         |
| cg11947187 | 8  | 134,142,317 | 0.000324 | 0.224 | 0.221 |          |       |     | <i>TG</i>        | Body    |
| cg03646189 | 5  | 2,756,101   | 0.032871 | 0.224 | 0.189 |          |       |     |                  |         |
| cg16765487 | 16 | 89,548,175  | 9.39E-09 | 0.224 | 0.216 |          |       |     | <i>ANKRD11</i>   | 5'UTR   |
| cg25577130 | 17 | 58,226,188  | 2.58E-08 | 0.224 | 0.217 |          |       |     | <i>CA4</i>       | TSS1500 |
| cg24001644 | X  | 20,134,719  | 0.0101   | 0.224 | 0.199 |          |       |     | <i>MAP7D2</i>    | Body    |
| cg20341504 | 2  | 54,900,998  | 0.028223 | 0.224 | 0.221 |          |       |     |                  |         |
| cg22518208 | 14 | 85,997,469  | 0.004261 | 0.224 | 0.242 |          |       |     | <i>FLRT2</i>     | 5'UTR   |
| cg11746996 | 13 | 69,459,533  | 1.58E-08 | 0.224 | 0.216 |          |       |     |                  |         |
| cg14067873 | 12 | 81,110,706  | 1.66E-17 | 0.224 | 0.204 |          |       |     | <i>MYF5</i>      | TSS200  |
| cg19793499 | 7  | 70,096,378  | 1.94E-10 | 0.224 | 0.216 |          |       |     | <i>AUTS2</i>     | Body    |
| cg16099804 | 5  | 83,680,253  | 0.005626 | 0.224 | 0.218 |          |       |     | <i>EDIL3</i>     | 5'UTR   |
| cg05030553 | 21 | 44,061,403  | 0.000448 | 0.224 | 0.181 |          |       |     |                  |         |
| cg16422907 | 13 | 37,006,734  | 0.000109 | 0.224 | 0.193 | 8.97E-24 | 0.197 |     | <i>CCNA1</i>     | 5'UTR   |
| cg22141459 | 17 | 27,899,465  | 7.4E-17  | 0.224 | 0.214 |          |       |     | <i>TP53I13</i>   | Body    |
| cg25623727 | 5  | 15,932,416  | 5.8E-10  | 0.224 | 0.208 |          |       |     | <i>FBXL7</i>     | Body    |
| cg26612727 | 17 | 38,024,636  | 5.4E-06  | 0.224 | 0.184 |          |       |     | <i>ZBP2</i>      | 1stExon |
| cg09350411 | 7  | 157,667,935 | 5.67E-07 | 0.224 | 0.159 |          |       |     | <i>PTPRN2</i>    | Body    |
| cg04915044 | 2  | 86,263,895  | 2.95E-05 | 0.224 | 0.238 |          |       |     | <i>POLR1A</i>    | Body    |
| cg19640500 | 14 | 55,982,148  | 2.62E-09 | 0.224 | 0.224 |          |       |     |                  |         |
| cg21958524 | 12 | 99,139,867  | 1.7E-06  | 0.224 | 0.147 |          |       |     | <i>ANKS1B</i>    | Body    |
| cg24607642 | 17 | 42,345,612  | 0.001093 | 0.224 | 0.233 |          |       | Yes | <i>SLC4A1</i>    | TSS200  |
| cg26867575 | 9  | 96,723,088  | 0.001935 | 0.224 | 0.241 |          |       |     |                  |         |
| cg06174078 | 11 | 1,325,718   | 0.030567 | 0.224 | 0.206 |          |       |     | <i>TOLLIP</i>    | Body    |
| cg16411668 | 4  | 123,704,747 | 1.18E-19 | 0.224 | 0.218 |          |       |     |                  |         |
| cg20429250 | 17 | 33,814,359  | 0.005527 | 0.224 | 0.228 |          |       |     | <i>SLFN12L</i>   | Body    |
| cg19256400 | 2  | 131,512,768 | 6.37E-09 | 0.224 | 0.246 |          |       |     | <i>FAM123C</i>   | TSS1500 |
| cg17839166 | 5  | 53,751,272  | 1.53E-06 | 0.224 | 0.263 |          |       |     | <i>HSPB3</i>     | TSS200  |
| cg08336287 | 10 | 11,206,892  | 5.43E-05 | 0.224 | 0.112 |          |       |     | <i>CUGBP2</i>    | TSS200  |
| cg08128361 | 16 | 67,336,052  | 0.018391 | 0.224 | 0.210 |          |       |     | <i>KCTD19</i>    | Body    |
| cg08188886 | 14 | 105,633,697 | 1.29E-07 | 0.224 | 0.181 |          |       |     | <i>JAG2</i>      | Body    |
| cg12938003 | 4  | 109,092,724 | 0.044973 | 0.224 | 0.287 |          |       |     | <i>LOC641518</i> | TSS1500 |

|            |    |             |          |       |       |          |       |  |                  |         |
|------------|----|-------------|----------|-------|-------|----------|-------|--|------------------|---------|
| cg22304507 | 3  | 136,537,863 | 0.029447 | 0.224 | 0.168 |          |       |  | <i>TMEM22</i>    | 1stExon |
| cg13990947 | 9  | 19,128,801  | 0.000652 | 0.224 | 0.178 |          |       |  | <i>PLIN2</i>     | TSS1500 |
| cg22490454 | 2  | 468,934     | 2.86E-06 | 0.224 | 0.215 |          |       |  |                  |         |
| cg04550823 | 1  | 87,617,916  | 0.003884 | 0.224 | 0.256 |          |       |  | <i>LOC339524</i> | Body    |
| cg07392601 | 9  | 133,413,095 | 0.000631 | 0.224 | 0.200 |          |       |  |                  |         |
| cg21728840 | 19 | 57,829,009  | 1.54E-05 | 0.224 | 0.260 |          |       |  |                  |         |
| cg24512005 | 11 | 3,014,291   | 7.09E-05 | 0.224 | 0.176 |          |       |  | <i>NAP1L4</i>    | TSS1500 |
| cg01602153 | 8  | 59,058,660  | 2.36E-06 | 0.224 | 0.212 |          |       |  | <i>FAM110B</i>   | 5'UTR   |
| cg01992935 | X  | 108,868,271 | 1.66E-05 | 0.224 | 0.240 |          |       |  | <i>KCNE1L</i>    | 1stExon |
| cg14437996 | 9  | 91,794,687  | 2.73E-06 | 0.224 | 0.215 |          |       |  | <i>SHC3</i>      | TSS1500 |
| cg02864688 | 1  | 11,752,342  | 4.37E-07 | 0.224 | 0.181 |          |       |  | <i>MAD2L2</i>    | TSS1500 |
| cg11826961 | 17 | 38,221,639  | 2.31E-05 | 0.224 | 0.224 |          |       |  | <i>THRA</i>      | 5'UTR   |
| cg16691593 | 5  | 76,934,634  | 0.001394 | 0.224 | 0.244 |          |       |  | <i>OTP</i>       | TSS200  |
| cg24095374 | 5  | 176,799,366 | 6.47E-10 | 0.224 | 0.195 |          |       |  | <i>RGS14</i>     | 3'UTR   |
| cg14842777 | 13 | 112,723,226 | 0.02484  | 0.224 | 0.192 |          |       |  | <i>SOX1</i>      | 1stExon |
| cg00176210 | 8  | 41,654,967  | 4.98E-07 | 0.224 | 0.159 | 1.18E-10 | 0.109 |  | <i>ANK1</i>      | Body    |
| cg03138928 | 1  | 226,004,826 | 0.000138 | 0.224 | 0.220 |          |       |  | <i>EPHX1</i>     | 5'UTR   |
| cg07589612 | 8  | 97,171,668  | 0.000107 | 0.224 | 0.269 |          |       |  | <i>GDF6</i>      | Body    |
| cg05998607 | 2  | 119,067,928 | 0.001957 | 0.224 | 0.225 |          |       |  |                  |         |
| cg06394621 | 10 | 29,236,369  | 7.52E-05 | 0.224 | 0.240 |          |       |  |                  |         |
| cg21097036 | 6  | 127,840,640 | 0.025654 | 0.224 | 0.220 |          |       |  | <i>C6orf174</i>  | TSS200  |
| cg04768602 | 8  | 99,960,148  | 1.03E-05 | 0.224 | 0.225 |          |       |  | <i>OSR2</i>      | 5'UTR   |
| cg10385303 | 14 | 36,983,146  | 0.014307 | 0.224 | 0.271 |          |       |  | <i>SFTA3</i>     | TSS200  |
| cg17557141 | 11 | 43,947,677  | 4.22E-09 | 0.224 | 0.226 |          |       |  |                  |         |
| cg20121142 | 7  | 19,158,001  | 0.003052 | 0.224 | 0.218 |          |       |  | <i>TWIST1</i>    | TSS1500 |
| cg20880080 | 18 | 19,780,644  | 1.31E-44 | 0.224 | 0.210 |          |       |  | <i>GATA6</i>     | Body    |
| cg14762436 | 7  | 24,917,750  | 9.88E-12 | 0.224 | 0.216 |          |       |  | <i>OSBPL3</i>    | Body    |
| cg05907933 | 5  | 77,268,888  | 0.03914  | 0.224 | 0.216 |          |       |  |                  |         |
| cg10221896 | 16 | 79,263,595  | 1.27E-08 | 0.224 | 0.240 |          |       |  |                  |         |
| cg14974772 | 14 | 92,414,425  | 0.003553 | 0.224 | 0.094 | 2.49E-22 | 0.142 |  | <i>FBLN5</i>     | TSS1500 |
| cg16105687 | 19 | 22,805,801  | 0.00574  | 0.224 | 0.233 |          |       |  |                  |         |
| cg05134847 | 22 | 19,742,426  | 5.75E-09 | 0.224 | 0.201 |          |       |  |                  |         |
| cg21658968 | 11 | 92,754,025  | 0.002494 | 0.224 | 0.177 |          |       |  |                  |         |
| cg27637521 | 17 | 76,355,202  | 1.81E-05 | 0.224 | 0.222 | 4.85E-22 | 0.225 |  | <i>SOCS3</i>     | 5'UTR   |

|            |    |             |          |       |       |          |       |  |                |         |
|------------|----|-------------|----------|-------|-------|----------|-------|--|----------------|---------|
| cg10214640 | 16 | 54,973,047  | 2.9E-05  | 0.224 | 0.211 |          |       |  |                |         |
| cg15016597 | 1  | 156,401,319 | 1.09E-12 | 0.224 | 0.203 |          |       |  |                |         |
| cg16286925 | 5  | 108,339,964 | 1.7E-10  | 0.224 | 0.217 |          |       |  | <i>FER</i>     | Body    |
| cg20355644 | 10 | 29,747,440  | 1.47E-18 | 0.224 | 0.221 |          |       |  | <i>SVIL</i>    | Body    |
| cg20970205 | 17 | 77,766,040  | 8.23E-06 | 0.224 | 0.215 |          |       |  |                |         |
| cg26099834 | 15 | 66,947,568  | 0.005371 | 0.224 | 0.142 |          |       |  |                |         |
| cg27141517 | 15 | 66,923,526  | 3.84E-12 | 0.224 | 0.209 |          |       |  |                |         |
| cg18397279 | X  | 91,036,807  | 0.037838 | 0.224 | 0.210 |          |       |  | <i>PCDH11X</i> | 5'UTR   |
| cg07853425 | 5  | 134,408,820 | 2.89E-09 | 0.224 | 0.233 |          |       |  |                |         |
| cg23369632 | 6  | 56,438,637  | 0.000201 | 0.224 | 0.266 |          |       |  | <i>DST</i>     | Body    |
| cg01603234 | 1  | 218,990,709 | 6.85E-10 | 0.224 | 0.260 |          |       |  |                |         |
| cg23300372 | 5  | 71,015,432  | 0.028567 | 0.224 | 0.202 | 1.22E-22 | 0.262 |  | <i>CARTPT</i>  | Body    |
| cg02683197 | 6  | 28,174,875  | 0.003281 | 0.224 | 0.243 |          |       |  |                |         |
| cg14062002 | 6  | 139,117,468 | 1.52E-05 | 0.224 | 0.225 |          |       |  |                |         |
| cg04638150 | 11 | 62,273,418  | 1.61E-09 | 0.223 | 0.202 |          |       |  | <i>AHNAK</i>   | Body    |
| cg08660959 | 6  | 32,044,163  | 2.98E-37 | 0.223 | 0.225 |          |       |  | <i>TNXB</i>    | Body    |
| cg09213124 | 17 | 38,599,508  | 0.000129 | 0.223 | 0.172 |          |       |  | <i>IGFBP4</i>  | TSS200  |
| cg16549694 | 1  | 42,204,925  | 5.12E-05 | 0.223 | 0.199 |          |       |  | <i>HIVEP3</i>  | 5'UTR   |
| cg08581937 | 17 | 7,555,132   | 0.012838 | 0.223 | 0.149 |          |       |  | <i>ATP1B2</i>  | Body    |
| cg04396896 | 11 | 125,364,611 | 0.005105 | 0.223 | 0.254 |          |       |  | <i>FEZ1</i>    | 5'UTR   |
| cg11055493 | 10 | 94,451,351  | 4.04E-05 | 0.223 | 0.196 |          |       |  | <i>HHEX</i>    | Body    |
| cg12532095 | 6  | 166,260,964 | 0.008221 | 0.223 | 0.087 |          |       |  |                |         |
| cg02473866 | 12 | 28,128,105  | 0.022872 | 0.223 | 0.264 |          |       |  |                |         |
| cg01733638 | 4  | 140,201,100 | 0.042726 | 0.223 | 0.202 |          |       |  | <i>C4orf49</i> | Body    |
| cg13808083 | 9  | 96,716,527  | 8.29E-07 | 0.223 | 0.205 |          |       |  | <i>BARX1</i>   | Body    |
| cg17633234 | 15 | 93,617,065  | 3.6E-07  | 0.223 | 0.178 |          |       |  | <i>RGMA</i>    | 1stExon |
| cg04132452 | 3  | 160,475,035 | 3.26E-08 | 0.223 | 0.231 |          |       |  | <i>PPM1L</i>   | Body    |
| cg15300753 | 11 | 48,057,861  | 2E-10    | 0.223 | 0.229 |          |       |  | <i>PTPRJ</i>   | Body    |
| cg14216285 | 6  | 28,778,124  | 0.043181 | 0.223 | 0.080 |          |       |  |                |         |
| cg04364695 | 8  | 40,618,425  | 0.000595 | 0.223 | 0.194 |          |       |  | <i>ZMAT4</i>   | Body    |
| cg14496753 | 9  | 124,979,184 | 1.09E-15 | 0.223 | 0.207 |          |       |  | <i>LHX6</i>    | Body    |
| cg26180469 | 11 | 64,081,563  | 1.86E-32 | 0.223 | 0.225 |          |       |  | <i>ESRRA</i>   | Body    |
| cg04042861 | 2  | 231,989,824 | 0.001629 | 0.223 | 0.192 |          |       |  | <i>HTR2B</i>   | TSS200  |
| cg09655666 | 17 | 34,820,190  | 0.019203 | 0.223 | 0.303 |          |       |  |                |         |

|            |    |             |          |       |       |          |       |  |                       |         |
|------------|----|-------------|----------|-------|-------|----------|-------|--|-----------------------|---------|
| cg17790928 | 7  | 1,277,790   | 0.006671 | 0.223 | 0.169 |          |       |  |                       |         |
| cg02711510 | 16 | 85,220,747  | 1.08E-17 | 0.223 | 0.226 |          |       |  |                       |         |
| cg06173663 | 7  | 101,579,929 | 0.00661  | 0.223 | 0.189 |          |       |  | <i>CUX1</i>           | Body    |
| cg11631427 | 17 | 59,478,579  | 0.014307 | 0.223 | 0.168 |          |       |  | <i>TBX2</i>           | Body    |
| cg15572396 | 3  | 58,321,349  | 1.13E-09 | 0.223 | 0.214 |          |       |  | <i>PXK</i>            | Body    |
| cg18576301 | 8  | 100,716,071 | 2.59E-13 | 0.223 | 0.216 |          |       |  | <i>VPS13B</i>         | Body    |
| cg18890556 | 2  | 225,266,580 | 6.84E-07 | 0.223 | 0.198 |          |       |  | <i>FAM124B</i>        | 5'UTR   |
| cg01616394 | 12 | 125,138,263 | 5.72E-11 | 0.223 | 0.234 |          |       |  |                       |         |
| cg06958211 | 15 | 40,532,180  | 1.76E-05 | 0.223 | 0.254 | 2.59E-23 | 0.282 |  | <i>PAK6</i>           | 1stExon |
| cg06812795 | 6  | 32,829,025  | 0.031162 | 0.223 | 0.166 |          |       |  |                       |         |
| cg16847637 | 7  | 130,020,328 | 0.000386 | 0.223 | 0.259 |          |       |  | <i>CPA1</i>           | 1stExon |
| cg02457328 | 12 | 103,355,190 | 0.001234 | 0.223 | 0.202 |          |       |  |                       |         |
| cg08966208 | 11 | 1,769,409   | 0.008606 | 0.223 | 0.148 |          |       |  | <i>HCCA2</i>          | Body    |
| cg14422093 | 1  | 227,009,245 | 4.36E-10 | 0.223 | 0.222 |          |       |  |                       |         |
| cg27141871 | 19 | 41,318,235  | 3.08E-14 | 0.223 | 0.224 |          |       |  |                       |         |
| cg26814883 | X  | 70,328,127  | 2.28E-07 | 0.223 | 0.211 |          |       |  | <i>CXorf65</i>        | TSS1500 |
| cg06142946 | 11 | 17,373,124  | 0.048975 | 0.223 | 0.039 |          |       |  | <i>DKFZp686O24166</i> | TSS200  |
| cg09595185 | 17 | 46,667,812  | 1.99E-08 | 0.223 | 0.223 |          |       |  | <i>LOC404266</i>      | TSS200  |
| cg11616676 | 7  | 87,848,143  | 0.022719 | 0.223 | 0.182 |          |       |  | <i>SRI</i>            | Body    |
| cg24684077 | 12 | 30,948,712  | 3.19E-06 | 0.223 | 0.213 |          |       |  |                       |         |
| cg27176129 | 20 | 43,937,155  | 0.000208 | 0.223 | 0.230 |          |       |  | <i>MATN4</i>          | TSS200  |
| cg01515515 | 1  | 92,414,295  | 0.000481 | 0.223 | 0.249 |          |       |  | <i>BRDT</i>           | TSS1500 |
| cg14323539 | 2  | 928,750     | 6.11E-20 | 0.223 | 0.201 |          |       |  |                       |         |
| cg18406033 | 2  | 223,159,869 | 8.78E-07 | 0.223 | 0.186 |          |       |  | <i>PAX3</i>           | Body    |
| cg19836471 | 10 | 79,638,108  | 0.000195 | 0.223 | 0.239 |          |       |  | <i>DLG5</i>           | Body    |
| cg21282907 | 6  | 74,289,980  | 0.000386 | 0.223 | 0.251 |          |       |  |                       |         |
| cg05267394 | 20 | 32,856,898  | 1.42E-05 | 0.223 | 0.175 |          |       |  | <i>ASIP</i>           | Body    |
| cg11808936 | 4  | 7,894,203   | 0.000676 | 0.223 | 0.171 |          |       |  | <i>AFAP1</i>          | 5'UTR   |
| cg25711779 | 2  | 56,149,825  | 6.14E-11 | 0.223 | 0.202 | 7.72E-16 | 0.175 |  | <i>EFEMP1</i>         | 5'UTR   |
| cg03813151 | 6  | 149,778,058 | 1.16E-17 | 0.223 | 0.236 |          |       |  | <i>ZC3H12D</i>        | Body    |
| cg12236164 | 9  | 972,622     | 0.006033 | 0.223 | 0.255 |          |       |  |                       |         |
| cg01682285 | 14 | 81,422,160  | 5.65E-07 | 0.223 | 0.199 |          |       |  | <i>TSHR</i>           | 1stExon |
| cg14814167 | 6  | 139,293,014 | 4.14E-19 | 0.223 | 0.229 |          |       |  | <i>REPS1</i>          | Body    |
| cg18207741 | 15 | 60,294,120  | 0.00426  | 0.223 | 0.266 |          |       |  |                       |         |

|            |    |             |          |       |       |          |       |     |                 |         |
|------------|----|-------------|----------|-------|-------|----------|-------|-----|-----------------|---------|
| cg27339452 | 3  | 136,537,752 | 0.009867 | 0.223 | 0.243 |          |       |     | <i>TMEM22</i>   | TSS200  |
| cg01500844 | 19 | 11,530,060  | 0.001461 | 0.223 | 0.215 |          |       |     | <i>RGL3</i>     | TSS200  |
| cg13773631 | 9  | 96,715,843  | 0.000666 | 0.223 | 0.235 |          |       |     | <i>BARX1</i>    | Body    |
| cg20345562 | 2  | 175,197,892 | 0.004505 | 0.223 | 0.270 |          |       |     |                 |         |
| cg21795544 | 5  | 42,993,440  | 0.010285 | 0.223 | 0.208 |          |       |     |                 |         |
| cg00278547 | 2  | 177,037,212 | 4.86E-06 | 0.223 | 0.170 |          |       |     | <i>HOXD3</i>    | 3'UTR   |
| cg26814835 | 20 | 30,195,969  | 0.001502 | 0.223 | 0.227 |          |       |     |                 |         |
| cg02100011 | 22 | 38,635,773  | 0.000136 | 0.223 | 0.251 |          |       |     | <i>TMEM184B</i> | Body    |
| cg03171770 | 10 | 43,393,728  | 0.012539 | 0.223 | 0.232 |          |       |     |                 |         |
| cg06158650 | 1  | 119,522,637 | 0.011435 | 0.223 | 0.228 |          |       |     | <i>TBX15</i>    | 5'UTR   |
| cg07786776 | 17 | 40,250,289  | 0.048971 | 0.223 | 0.264 |          |       |     |                 |         |
| cg11453076 | 6  | 137,812,735 | 1.12E-06 | 0.223 | 0.234 |          |       |     |                 |         |
| cg21033965 | 1  | 178,455,800 | 4.84E-05 | 0.223 | 0.234 |          |       |     |                 |         |
| cg05379541 | 7  | 27,252,541  | 1.85E-06 | 0.223 | 0.203 |          |       |     |                 |         |
| cg15304404 | 6  | 163,826,969 | 0.006931 | 0.223 | 0.155 |          |       |     |                 |         |
| cg00352218 | 6  | 19,691,654  | 0.012927 | 0.223 | 0.264 |          |       |     |                 |         |
| cg24206827 | 2  | 214,098,074 | 8.69E-05 | 0.223 | 0.199 |          |       |     |                 |         |
| cg00667862 | 1  | 91,300,446  | 0.037723 | 0.223 | 0.272 |          |       |     |                 |         |
| cg01884681 | 17 | 70,339,149  | 1.18E-05 | 0.223 | 0.207 |          |       |     |                 |         |
| cg12497374 | 3  | 14,339,534  | 4.85E-07 | 0.223 | 0.227 |          |       |     |                 |         |
| cg19194167 | 15 | 57,846,210  | 2.18E-09 | 0.223 | 0.222 |          |       |     |                 |         |
| cg11875044 | 10 | 8,546,509   | 0.019413 | 0.223 | 0.162 |          |       |     |                 |         |
| cg01997270 | 22 | 44,418,018  | 6.55E-17 | 0.223 | 0.204 |          |       |     | <i>PARVB</i>    | Body    |
| cg11978884 | 5  | 135,415,819 | 8.49E-05 | 0.223 | 0.163 |          |       |     |                 |         |
| cg26597734 | 16 | 11,150,952  | 3.41E-05 | 0.223 | 0.221 |          |       | Yes | <i>CLEC16A</i>  | Body    |
| cg11947981 | 2  | 182,322,749 | 0.03716  | 0.223 | 0.219 |          |       |     | <i>ITGA4</i>    | Body    |
| cg22132509 | 3  | 160,475,102 | 4.71E-08 | 0.223 | 0.216 |          |       |     | <i>PPM1L</i>    | Body    |
| cg26643856 | 6  | 32,977,349  | 5.06E-05 | 0.223 | 0.242 | 7.95E-26 | 0.143 |     | <i>HLA-DOA</i>  | 1stExon |
| cg02108033 | 4  | 17,783,294  | 0.012037 | 0.223 | 0.198 |          |       |     | <i>FAM184B</i>  | TSS200  |
| cg04992588 | 3  | 58,563,674  | 1.03E-09 | 0.223 | 0.216 |          |       |     | <i>FAM107A</i>  | TSS200  |
| cg17291521 | 5  | 50,260,045  | 2.91E-08 | 0.223 | 0.195 |          |       |     |                 |         |
| cg01281911 | 1  | 47,882,686  | 9.84E-05 | 0.223 | 0.293 |          |       |     | <i>FOXE3</i>    | 1stExon |
| cg05754861 | 8  | 99,961,768  | 2.49E-07 | 0.223 | 0.213 |          |       |     | <i>OSR2</i>     | Body    |
| cg16754788 | 8  | 97,803,770  | 1.08E-09 | 0.223 | 0.225 |          |       |     | <i>PGCP</i>     | Body    |

|            |    |             |          |       |       |  |  |     |                |         |
|------------|----|-------------|----------|-------|-------|--|--|-----|----------------|---------|
| cg27183030 | 7  | 99,595,458  | 0.005188 | 0.223 | 0.192 |  |  |     |                |         |
| cg06036471 | 10 | 93,861,385  | 0.000182 | 0.223 | 0.198 |  |  |     | <i>CPEB3</i>   | Body    |
| cg17733820 | 22 | 31,536,784  | 0.001061 | 0.223 | 0.156 |  |  | Yes | <i>PLA2G3</i>  | TSS1500 |
| cg24718465 | 19 | 46,999,118  | 9.97E-05 | 0.223 | 0.238 |  |  |     | <i>PNMAL2</i>  | 1stExon |
| cg05945290 | 17 | 39,792,147  | 0.001351 | 0.223 | 0.250 |  |  |     |                |         |
| cg15237152 | 19 | 11,649,631  | 1.15E-07 | 0.223 | 0.207 |  |  |     | <i>CNN1</i>    | 1stExon |
| cg15681255 | 8  | 27,192,141  | 4.31E-10 | 0.223 | 0.197 |  |  |     | <i>PTK2B</i>   | 5'UTR   |
| cg18516557 | 2  | 177,004,015 | 3.22E-08 | 0.223 | 0.192 |  |  |     |                |         |
| cg07310406 | 22 | 50,524,374  | 2.47E-05 | 0.223 | 0.228 |  |  |     | <i>MLC1</i>    | TSS1500 |
| cg19577548 | 20 | 48,178,928  | 1.39E-16 | 0.223 | 0.236 |  |  |     | <i>PTGIS</i>   | Body    |
| cg04347414 | 1  | 2,084,519   | 5.26E-05 | 0.223 | 0.178 |  |  |     | <i>PRKCZ</i>   | Body    |
| cg08348422 | 2  | 236,935,654 | 1.14E-10 | 0.223 | 0.216 |  |  |     | <i>AGAP1</i>   | Body    |
| cg12731671 | 20 | 6,033,516   | 1.67E-06 | 0.223 | 0.198 |  |  |     | <i>LRRN4</i>   | 5'UTR   |
| cg06609197 | 8  | 80,524,611  | 0.014631 | 0.223 | 0.287 |  |  |     | <i>STMN2</i>   | Body    |
| cg20690125 | 17 | 74,476,978  | 2.64E-08 | 0.223 | 0.227 |  |  |     | <i>RHBDF2</i>  | Body    |
| cg16477774 | 11 | 65,325,249  | 0.008058 | 0.223 | 0.128 |  |  |     | <i>LTBP3</i>   | 1stExon |
| cg03396354 | 19 | 46,519,603  | 0.008178 | 0.223 | 0.171 |  |  |     | <i>CCDC61</i>  | Body    |
| cg18961681 | 7  | 32,467,657  | 0.009699 | 0.223 | 0.245 |  |  |     |                |         |
| cg00376022 | 7  | 19,183,880  | 0.008883 | 0.223 | 0.337 |  |  |     |                |         |
| cg01026503 | 20 | 62,025,366  | 8.31E-07 | 0.223 | 0.240 |  |  |     |                |         |
| cg04146745 | 3  | 42,947,263  | 0.000848 | 0.223 | 0.140 |  |  |     | <i>ZNF662</i>  | TSS1500 |
| cg10425005 | 16 | 10,133,433  | 0.007672 | 0.223 | 0.246 |  |  |     | <i>GRIN2A</i>  | Body    |
| cg11871421 | 17 | 6,679,476   | 0.026434 | 0.223 | 0.217 |  |  |     | <i>FBXO39</i>  | TSS200  |
| cg14094242 | 4  | 56,020,979  | 1.67E-05 | 0.223 | 0.221 |  |  |     |                |         |
| cg23363971 | 12 | 56,415,271  | 0.000126 | 0.223 | 0.222 |  |  |     | <i>IKZF4</i>   | 1stExon |
| cg02744524 | 3  | 138,655,827 | 0.038707 | 0.223 | 0.237 |  |  |     |                |         |
| cg09590377 | 2  | 8,597,389   | 0.003764 | 0.223 | 0.220 |  |  |     |                |         |
| cg13768290 | 2  | 63,285,491  | 0.000342 | 0.223 | 0.217 |  |  |     |                |         |
| cg19921377 | 19 | 7,580,209   | 1.88E-11 | 0.223 | 0.218 |  |  | Yes | <i>ZNF358</i>  | TSS1500 |
| cg24377070 | 3  | 128,182,041 | 1.74E-17 | 0.223 | 0.195 |  |  |     | <i>DNAJB8</i>  | Body    |
| cg00380924 | 6  | 166,967,377 | 1.69E-12 | 0.223 | 0.221 |  |  |     | <i>RPS6KA2</i> | Body    |
| cg10635443 | 8  | 23,557,486  | 3.1E-06  | 0.223 | 0.195 |  |  |     |                |         |
| cg15824100 | 1  | 77,980,005  | 8.99E-11 | 0.223 | 0.240 |  |  |     | <i>AK5</i>     | Body    |
| cg26660800 | 17 | 59,480,926  | 6.93E-06 | 0.223 | 0.188 |  |  |     | <i>TBX2</i>    | Body    |

|            |    |             |          |       |       |            |       |  |                |         |
|------------|----|-------------|----------|-------|-------|------------|-------|--|----------------|---------|
| cg18085176 | 4  | 7,939,940   | 1.48E-08 | 0.223 | 0.235 |            |       |  | <i>AFAP1</i>   | 5'UTR   |
| cg21414905 | 6  | 11,901,382  | 1.65E-14 | 0.223 | 0.217 |            |       |  |                |         |
| cg17193155 | 6  | 27,203,343  | 0.000156 | 0.223 | 0.242 |            |       |  |                |         |
| cg00852595 | 12 | 99,548,437  | 2.34E-07 | 0.223 | 0.237 |            |       |  | <i>ANKS1B</i>  | 1stExon |
| cg02197228 | 2  | 220,402,771 | 1.7E-08  | 0.223 | 0.250 |            |       |  | <i>ACCN4</i>   | 3'UTR   |
| cg06103243 | 3  | 193,923,516 | 2.62E-12 | 0.223 | 0.209 |            |       |  |                |         |
| cg10600534 | 15 | 60,971,920  | 2.53E-14 | 0.223 | 0.231 |            |       |  | <i>RORA</i>    | Body    |
| cg18861547 | 1  | 22,196,887  | 1.2E-11  | 0.223 | 0.180 |            |       |  | <i>HSPG2</i>   | Body    |
| cg16864658 | 3  | 42,306,150  | 0.024416 | 0.223 | 0.199 | 0.00000401 | 0.116 |  | <i>CCK</i>     | 5'UTR   |
| cg17327331 | 14 | 67,736,448  | 8.24E-10 | 0.223 | 0.236 |            |       |  | <i>MPP5</i>    | 5'UTR   |
| cg25771271 | 1  | 119,550,191 | 0.002452 | 0.223 | 0.254 |            |       |  |                |         |
| cg06207120 | 15 | 45,996,521  | 1.32E-07 | 0.223 | 0.207 |            |       |  |                |         |
| cg05583240 | 12 | 105,477,579 | 0.012044 | 0.223 | 0.169 |            |       |  | <i>ALDH1L2</i> | Body    |
| cg09970120 | 7  | 155,167,844 | 0.013839 | 0.223 | 0.194 |            |       |  |                |         |
| cg05218245 | 6  | 31,683,352  | 1.05E-23 | 0.223 | 0.222 |            |       |  | <i>LY6G6D</i>  | Body    |
| cg26558799 | 17 | 80,806,435  | 3.56E-07 | 0.223 | 0.243 |            |       |  | <i>TBCD</i>    | Body    |
| cg07533511 | 12 | 94,580,931  | 6.83E-08 | 0.223 | 0.206 |            |       |  | <i>PLXNC1</i>  | Body    |
| cg10236239 | 2  | 108,994,514 | 9.84E-08 | 0.223 | 0.208 | 6.45E-13   | 0.125 |  | <i>SULT1C4</i> | 5'UTR   |
| cg18112953 | 20 | 47,448,545  | 2.21E-12 | 0.223 | 0.203 |            |       |  |                |         |
| cg13526915 | 14 | 24,164,078  | 0.002581 | 0.223 | 0.156 |            |       |  |                |         |
| cg18264486 | 6  | 31,650,916  | 0.017892 | 0.223 | 0.275 |            |       |  |                |         |
| cg20862097 | 6  | 39,760,776  | 0.006302 | 0.223 | 0.277 |            |       |  | <i>DAAM2</i>   | TSS200  |
| cg23448348 | 3  | 139,257,907 | 7.9E-07  | 0.223 | 0.227 |            |       |  | <i>RBP1</i>    | Body    |
| cg01804036 | 12 | 117,483,310 | 1.22E-07 | 0.223 | 0.186 |            |       |  | <i>TESC</i>    | Body    |
| cg10114725 | 2  | 225,266,733 | 0.010716 | 0.223 | 0.266 |            |       |  | <i>FAM124B</i> | TSS200  |
| cg18901140 | 17 | 8,908,225   | 2.55E-10 | 0.223 | 0.194 |            |       |  |                |         |
| cg07958575 | 7  | 140,206,867 | 6.48E-05 | 0.223 | 0.243 |            |       |  |                |         |
| cg26950867 | 2  | 216,299,856 | 1.89E-07 | 0.223 | 0.219 |            |       |  | <i>FN1</i>     | Body    |
| cg26965695 | X  | 23,926,980  | 7.5E-23  | 0.223 | 0.211 |            |       |  | <i>CXorf58</i> | 5'UTR   |
| cg13764778 | 17 | 48,546,503  | 0.021667 | 0.223 | 0.219 |            |       |  | <i>CHAD</i>    | TSS1500 |
| cg26074349 | 12 | 50,426,727  | 0.011128 | 0.223 | 0.266 |            |       |  |                |         |
| cg24953596 | 1  | 3,515,194   | 0.00615  | 0.223 | 0.249 |            |       |  | <i>MEGF6</i>   | Body    |
| cg13466456 | 1  | 29,587,088  | 1.77E-05 | 0.223 | 0.214 |            |       |  | <i>PTPRU</i>   | Body    |
| cg07981013 | 7  | 156,795,767 | 0.020602 | 0.223 | 0.184 |            |       |  |                |         |



|            |    |             |          |       |       |          |       |  |                 |         |
|------------|----|-------------|----------|-------|-------|----------|-------|--|-----------------|---------|
| cg15992347 | 11 | 85,565,475  | 0.02058  | 0.223 | 0.149 |          |       |  | <i>CCDC83</i>   | TSS1500 |
| cg22367872 | 1  | 4,718,573   | 0.003819 | 0.223 | 0.178 |          |       |  | <i>AJAP1</i>    | Body    |
| cg15029935 | 15 | 91,126,012  | 9.87E-29 | 0.223 | 0.205 |          |       |  | <i>CRTC3</i>    | Body    |
| cg14025021 | 15 | 43,809,510  | 2.13E-08 | 0.223 | 0.217 |          |       |  | <i>MAP1A</i>    | TSS1500 |
| cg22236066 | 8  | 103,742,123 | 1.54E-10 | 0.223 | 0.233 |          |       |  |                 |         |
| cg17360338 | 19 | 19,500,060  | 8.16E-10 | 0.223 | 0.215 |          |       |  | <i>GATAD2A</i>  | 5'UTR   |
| cg20647118 | 13 | 92,051,786  | 0.001135 | 0.223 | 0.233 |          |       |  | <i>GPC5</i>     | Body    |
| cg26176204 | 2  | 236,401,677 | 3.77E-06 | 0.223 | 0.199 |          |       |  | <i>AGAP1</i>    | TSS1500 |
| cg01379344 | 17 | 70,609,699  | 1.69E-08 | 0.223 | 0.231 |          |       |  |                 |         |
| cg08380556 | 13 | 31,020,218  | 0.003826 | 0.223 | 0.142 |          |       |  |                 |         |
| cg09533305 | 22 | 38,853,600  | 1.44E-09 | 0.223 | 0.215 |          |       |  |                 |         |
| cg04328562 | 19 | 11,649,701  | 2.38E-05 | 0.223 | 0.245 |          |       |  | <i>CNN1</i>     | 1stExon |
| cg14235846 | 17 | 800,745     | 1.25E-08 | 0.223 | 0.222 |          |       |  | <i>NXN</i>      | Body    |
| cg19160624 | 12 | 68,221,623  | 8.47E-05 | 0.223 | 0.208 |          |       |  |                 |         |
| cg03744842 | 7  | 45,067,319  | 1.83E-08 | 0.223 | 0.186 |          |       |  | <i>CCM2</i>     | Body    |
| cg14368473 | 9  | 123,694,717 | 8.89E-12 | 0.223 | 0.204 |          |       |  |                 |         |
| cg01539484 | 7  | 130,040,067 | 3.15E-12 | 0.223 | 0.230 |          |       |  | <i>TSGA14</i>   | Body    |
| cg13861294 | 12 | 100,750,473 | 2.06E-05 | 0.223 | 0.290 |          |       |  | <i>SLC17A8</i>  | TSS1500 |
| cg15206981 | 4  | 124,323,013 | 2.54E-06 | 0.223 | 0.251 |          |       |  | <i>SPRY1</i>    | Body    |
| cg22452837 | 6  | 28,664,155  | 0.025131 | 0.223 | 0.270 |          |       |  |                 |         |
| cg00318756 | 1  | 67,773,020  | 0.006806 | 0.223 | 0.169 |          |       |  | <i>IL12RB2</i>  | TSS200  |
| cg10174333 | 1  | 116,336,029 | 0.003625 | 0.223 | 0.217 |          |       |  |                 |         |
| cg10421029 | 16 | 30,936,028  | 2.17E-06 | 0.223 | 0.198 |          |       |  | <i>FBXL19</i>   | 1stExon |
| cg18017908 | 17 | 16,394,618  | 0.000209 | 0.223 | 0.135 | 4.51E-13 | 0.108 |  | <i>C17orf76</i> | Body    |
| cg06964190 | 11 | 61,275,247  | 3.61E-08 | 0.223 | 0.185 |          |       |  | <i>LRRC10B</i>  | TSS1500 |
| cg19907725 | 1  | 153,539,397 | 9.07E-10 | 0.223 | 0.212 |          |       |  | <i>S100A2</i>   | TSS1500 |
| cg14507146 | 5  | 34,043,333  | 5.84E-14 | 0.223 | 0.198 |          |       |  | <i>C1QTNF3</i>  | TSS200  |
| cg26323077 | 11 | 95,831,121  | 3.49E-16 | 0.223 | 0.236 |          |       |  | <i>MAML2</i>    | Body    |
| cg25033990 | 17 | 32,484,014  | 6.88E-05 | 0.223 | 0.242 |          |       |  | <i>ACCN1</i>    | TSS200  |
| cg26498247 | 16 | 50,003,613  | 4.38E-12 | 0.223 | 0.189 |          |       |  |                 |         |
| cg07997434 | 2  | 238,864,969 | 0.008284 | 0.222 | 0.207 |          |       |  |                 |         |
| cg22711111 | 6  | 30,139,979  | 0.006388 | 0.222 | 0.318 |          |       |  | <i>TRIM15</i>   | Body    |
| cg22729681 | 1  | 164,717,625 | 2.24E-06 | 0.222 | 0.245 |          |       |  | <i>PBX1</i>     | Body    |
| cg10503842 | 15 | 23,158,338  | 0.001707 | 0.222 | 0.261 |          |       |  |                 |         |

|            |    |             |          |       |       |          |       |     |                  |         |
|------------|----|-------------|----------|-------|-------|----------|-------|-----|------------------|---------|
| cg04905421 | 16 | 1,581,129   | 1.62E-08 | 0.222 | 0.230 |          |       |     | <i>IFT140</i>    | Body    |
| cg13850401 | 9  | 133,413,080 | 0.000296 | 0.222 | 0.211 |          |       |     |                  |         |
| cg22663372 | 2  | 45,161,107  | 0.001839 | 0.222 | 0.188 |          |       |     |                  |         |
| cg01668281 | 21 | 37,915,281  | 2.88E-11 | 0.222 | 0.222 |          |       |     | <i>CLDN14</i>    | 5'UTR   |
| cg02218506 | 10 | 132,975,885 | 0.0005   | 0.222 | 0.251 |          |       |     | <i>TCERG1L</i>   | Body    |
| cg05710562 | 3  | 13,323,633  | 1.59E-05 | 0.222 | 0.203 |          |       |     |                  |         |
| cg05557233 | 6  | 27,482,950  | 0.036431 | 0.222 | 0.248 |          |       |     |                  |         |
| cg11700800 | 5  | 92,906,633  | 3.93E-06 | 0.222 | 0.244 |          |       |     | <i>FLJ42709</i>  | Body    |
| cg20296924 | 2  | 3,654,470   | 1.82E-16 | 0.222 | 0.220 |          |       |     | <i>COLEC11</i>   | Body    |
| cg22459664 | 7  | 139,929,764 | 0.022491 | 0.222 | 0.151 |          |       |     |                  |         |
| cg06275859 | 4  | 1,407,694   | 0.005489 | 0.222 | 0.247 |          |       |     |                  |         |
| cg09106510 | 11 | 71,050,395  | 9.86E-10 | 0.222 | 0.201 |          |       |     |                  |         |
| cg14580628 | 5  | 43,602,116  | 0.003975 | 0.222 | 0.111 |          |       |     | <i>NNT</i>       | TSS1500 |
| cg03486832 | 12 | 122,019,525 | 4.65E-05 | 0.222 | 0.228 |          |       |     | <i>KDM2B</i>     | TSS1500 |
| cg10632395 | 6  | 137,815,648 | 0.004229 | 0.222 | 0.261 |          |       |     | <i>OLIG3</i>     | TSS200  |
| cg25007705 | 1  | 21,588,799  | 2.18E-10 | 0.222 | 0.212 |          |       |     | <i>ECE1</i>      | Body    |
| cg01947130 | 15 | 60,287,196  | 0.021246 | 0.222 | 0.235 |          |       |     |                  |         |
| cg01611777 | 2  | 102,359,027 | 0.019442 | 0.222 | 0.125 |          |       |     | <i>MAP4K4</i>    | Body    |
| cg07145843 | 5  | 95,769,025  | 0.006342 | 0.222 | 0.184 |          |       |     | <i>PCSK1</i>     | TSS200  |
| cg04859826 | 1  | 59,479,179  | 0.000677 | 0.222 | 0.173 |          |       |     |                  |         |
| cg19483007 | 3  | 149,327,651 | 0.000175 | 0.222 | 0.210 |          |       |     | <i>WWTR1</i>     | Body    |
| cg00053393 | 4  | 183,064,388 | 5.48E-06 | 0.222 | 0.249 |          |       |     | <i>MGC45800</i>  | Body    |
| cg15339164 | 12 | 3,589,869   | 3.65E-06 | 0.222 | 0.242 |          |       |     |                  |         |
| cg19344322 | 7  | 105,650,550 | 6.76E-12 | 0.222 | 0.216 |          |       |     | <i>FLJ23834</i>  | Body    |
| cg27134827 | 6  | 32,121,566  | 0.001747 | 0.222 | 0.194 |          |       |     | <i>PPT2</i>      | Body    |
| cg24135939 | 6  | 42,419,091  | 0.008073 | 0.222 | 0.209 |          |       |     | <i>TRERF1</i>    | 5'UTR   |
| cg06261926 | 2  | 161,264,607 | 0.01152  | 0.222 | 0.148 |          |       |     | <i>RBMS1</i>     | Body    |
| cg00171092 | 3  | 124,531,371 | 7.2E-10  | 0.222 | 0.200 |          |       | Yes | <i>ITGB5</i>     | Body    |
| cg03430846 | 8  | 31,497,082  | 0.038383 | 0.222 | 0.216 |          |       |     | <i>NRG1</i>      | TSS200  |
| cg07316846 | 2  | 105,484,694 | 0.00844  | 0.222 | 0.272 |          |       |     |                  |         |
| cg00294382 | 12 | 56,732,721  | 0.000128 | 0.222 | 0.210 | 5.13E-19 | 0.172 |     | <i>IL23A</i>     | 5'UTR   |
| cg01296593 | 16 | 86,599,976  | 0.007458 | 0.222 | 0.255 |          |       |     | <i>FOXC2</i>     | TSS1500 |
| cg24210813 | 17 | 46,669,644  | 8.19E-09 | 0.222 | 0.191 |          |       |     | <i>LOC404266</i> | TSS200  |
| cg00824767 | 10 | 23,488,272  | 0.00169  | 0.222 | 0.213 |          |       |     |                  |         |

|            |    |             |          |       |       |          |       |  |                 |         |
|------------|----|-------------|----------|-------|-------|----------|-------|--|-----------------|---------|
| cg13793157 | 19 | 51,415,450  | 1.14E-11 | 0.222 | 0.223 |          |       |  | <i>KLK4</i>     | TSS1500 |
| cg15090211 | 6  | 3,232,464   | 0.034381 | 0.222 | 0.097 |          |       |  |                 |         |
| cg18390495 | 20 | 239,809     | 2.08E-06 | 0.222 | 0.194 |          |       |  | <i>DEFB132</i>  | Body    |
| cg19909787 | 10 | 124,907,708 | 0.019552 | 0.222 | 0.170 |          |       |  | <i>HMX2</i>     | 1stExon |
| cg14989164 | 1  | 180,205,157 | 0.007343 | 0.222 | 0.278 |          |       |  | <i>LHX4</i>     | Body    |
| cg15668533 | 3  | 10,858,446  | 1.5E-06  | 0.222 | 0.194 |          |       |  | <i>SLC6A11</i>  | Body    |
| cg00983904 | 12 | 6,665,288   | 0.000111 | 0.222 | 0.220 |          |       |  | <i>IFFO1</i>    | TSS200  |
| cg00090619 | 6  | 33,160,286  | 0.042762 | 0.222 | 0.298 |          |       |  | <i>COL11A2</i>  | TSS200  |
| cg12936335 | 6  | 150,286,212 | 0.016536 | 0.222 | 0.196 |          |       |  | <i>ULBP1</i>    | Body    |
| cg15175129 | 12 | 65,672,052  | 2.28E-06 | 0.222 | 0.204 |          |       |  | <i>MSRB3</i>    | TSS1500 |
| cg22038738 | 8  | 42,064,673  | 1.83E-11 | 0.222 | 0.170 | 2.57E-21 | 0.148 |  | <i>PLAT</i>     | 5'UTR   |
| cg22976533 | 14 | 105,784,090 | 1.65E-06 | 0.222 | 0.208 |          |       |  | <i>PACS2</i>    | Body    |
| cg15205547 | 7  | 23,514,347  | 0.044608 | 0.222 | 0.219 |          |       |  |                 |         |
| cg16097191 | 1  | 9,262,511   | 1.53E-05 | 0.222 | 0.200 |          |       |  |                 |         |
| cg24378440 | 22 | 25,816,699  | 0.006006 | 0.222 | 0.198 |          |       |  |                 |         |
| cg02590287 | X  | 106,161,451 | 1.19E-08 | 0.222 | 0.218 |          |       |  | <i>CLDN2</i>    | 5'UTR   |
| cg16299747 | 10 | 118,429,952 | 0.003042 | 0.222 | 0.195 |          |       |  | <i>C10orf82</i> | TSS1500 |
| cg00575066 | 6  | 10,390,039  | 0.000126 | 0.222 | 0.235 |          |       |  |                 |         |
| cg08959094 | 16 | 88,186,048  | 3.51E-32 | 0.222 | 0.221 |          |       |  |                 |         |
| cg09940311 | 1  | 183,901,666 | 7.82E-05 | 0.222 | 0.190 |          |       |  |                 |         |
| cg19092096 | 1  | 110,612,474 | 3.82E-07 | 0.222 | 0.211 |          |       |  | <i>ALX3</i>     | Body    |
| cg21566081 | 7  | 127,841,626 | 0.010023 | 0.222 | 0.195 |          |       |  |                 |         |
| cg00099602 | 6  | 87,993,447  | 5.28E-08 | 0.222 | 0.265 |          |       |  | <i>GJB7</i>     | 3'UTR   |
| cg15616358 | 11 | 68,610,296  | 1.77E-07 | 0.222 | 0.233 |          |       |  | <i>CPT1A</i>    | TSS1500 |
| cg04214430 | 13 | 50,702,707  | 1.09E-11 | 0.222 | 0.201 |          |       |  |                 |         |
| cg01835695 | 5  | 180,230,959 | 2.62E-09 | 0.222 | 0.202 |          |       |  | <i>MGAT1</i>    | 5'UTR   |
| cg07278054 | 3  | 55,523,594  | 2.01E-08 | 0.222 | 0.194 |          |       |  |                 |         |
| cg07515989 | 1  | 43,250,763  | 0.000621 | 0.222 | 0.238 |          |       |  |                 |         |
| cg14537332 | 11 | 70,508,113  | 1.28E-05 | 0.222 | 0.202 |          |       |  | <i>SHANK2</i>   | Body    |
| cg04784839 | 2  | 114,299,047 | 0.006791 | 0.222 | 0.168 |          |       |  |                 |         |
| cg16104076 | 5  | 40,682,069  | 3.19E-06 | 0.222 | 0.234 |          |       |  | <i>PTGER4</i>   | Body    |
| cg18344930 | 5  | 87,441,081  | 0.017628 | 0.222 | 0.289 |          |       |  |                 |         |
| cg19700872 | 5  | 145,895,766 | 0.040164 | 0.222 | 0.259 |          |       |  | <i>GPR151</i>   | TSS200  |
| cg20495365 | 4  | 3,371,291   | 0.000113 | 0.222 | 0.201 |          |       |  | <i>RGS12</i>    | TSS1500 |

|            |    |             |          |       |       |          |       |     |                  |         |
|------------|----|-------------|----------|-------|-------|----------|-------|-----|------------------|---------|
| cg00634665 | 8  | 54,790,957  | 0.000483 | 0.222 | 0.243 |          |       |     | <i>RGS20</i>     | Body    |
| cg12308407 | 6  | 32,081,491  | 1.51E-14 | 0.222 | 0.229 |          |       |     |                  |         |
| cg02097014 | 1  | 203,156,374 | 0.007651 | 0.222 | 0.164 |          |       |     | <i>CHI3L1</i>    | TSS1500 |
| cg26046136 | 20 | 45,526,613  | 1.24E-09 | 0.222 | 0.196 |          |       |     | <i>EYA2</i>      | 5'UTR   |
| cg18143296 | 3  | 157,812,763 | 0.001542 | 0.222 | 0.231 |          |       |     |                  |         |
| cg06230839 | 21 | 43,189,892  | 2.1E-17  | 0.222 | 0.206 |          |       |     |                  |         |
| cg06829686 | 1  | 47,910,843  | 1.4E-05  | 0.222 | 0.202 |          |       |     |                  |         |
| cg11325578 | X  | 9,733,287   | 1.08E-10 | 0.222 | 0.216 |          |       |     | <i>GPR143</i>    | Body    |
| cg08235970 | 1  | 18,957,023  | 0.010083 | 0.222 | 0.189 |          |       |     | <i>PAX7</i>      | TSS1500 |
| cg08783616 | 17 | 16,389,293  | 0.000517 | 0.222 | 0.152 |          |       |     | <i>C17orf76</i>  | Body    |
| cg20954987 | 12 | 48,578,223  | 0.003569 | 0.222 | 0.257 |          |       |     | <i>C12orf68</i>  | 1stExon |
| cg15414638 | 6  | 28,956,731  | 9.66E-05 | 0.222 | 0.209 |          |       |     |                  |         |
| cg18425434 | 10 | 118,429,648 | 0.000192 | 0.222 | 0.286 |          |       |     | <i>C10orf82</i>  | TSS200  |
| cg20248056 | 13 | 113,704,976 | 8.42E-08 | 0.222 | 0.197 |          |       |     | <i>MCF2L</i>     | Body    |
| cg10282491 | 16 | 3,062,368   | 3.76E-06 | 0.222 | 0.230 | 2.24E-25 | 0.200 |     | <i>CLDN9</i>     | TSS200  |
| cg16895719 | 8  | 25,899,257  | 2.9E-05  | 0.222 | 0.206 |          |       |     | <i>EBF2</i>      | Body    |
| cg23015917 | 1  | 67,485,337  | 2.47E-09 | 0.222 | 0.217 |          |       |     | <i>SLC35D1</i>   | Body    |
| cg04407762 | 4  | 113,442,791 | 0.001777 | 0.222 | 0.183 |          |       |     |                  |         |
| cg05939970 | 3  | 127,795,340 | 3.1E-05  | 0.222 | 0.234 |          |       |     |                  |         |
| cg05643964 | 20 | 62,369,504  | 0.00494  | 0.222 | 0.258 |          |       |     | <i>LIME1</i>     | Body    |
| cg15633699 | 1  | 1,356,728   | 2.41E-12 | 0.222 | 0.198 |          |       |     | <i>LOC441869</i> | TSS200  |
| cg15909232 | 7  | 156,235,420 | 3.17E-05 | 0.222 | 0.264 |          |       | Yes |                  |         |
| cg17445765 | 7  | 64,403,162  | 0.000347 | 0.222 | 0.144 |          |       |     |                  |         |
| cg18569734 | 6  | 108,496,460 | 4.93E-05 | 0.222 | 0.218 |          |       |     | <i>NR2E1</i>     | Body    |
| cg19759671 | 4  | 183,063,459 | 0.002394 | 0.222 | 0.203 |          |       |     | <i>MGC45800</i>  | Body    |
| cg26590537 | 12 | 5,020,202   | 7.77E-05 | 0.222 | 0.241 | 4.79E-09 | 0.104 |     | <i>KCNA1</i>     | 5'UTR   |
| cg11840197 | 20 | 60,540,469  | 0.005545 | 0.222 | 0.201 |          |       |     |                  |         |
| cg16639691 | 13 | 28,597,227  | 1.49E-05 | 0.222 | 0.235 |          |       |     | <i>FLT3</i>      | Body    |
| cg18564686 | 2  | 10,169,675  | 9.13E-08 | 0.222 | 0.212 |          |       |     |                  |         |
| cg20671920 | 8  | 10,586,678  | 1.57E-09 | 0.222 | 0.212 |          |       |     | <i>SOX7</i>      | Body    |
| cg05779272 | 9  | 33,168,018  | 2.56E-13 | 0.222 | 0.205 | 1.59E-14 | 0.118 |     | <i>B4GALT1</i>   | TSS1500 |
| cg09630706 | 7  | 229,695     | 2.53E-13 | 0.222 | 0.218 |          |       |     | <i>FAM20C</i>    | Body    |
| cg11049075 | 17 | 42,199,063  | 5.57E-15 | 0.222 | 0.238 |          |       |     | <i>HDAC5</i>     | 5'UTR   |
| cg16592596 | 17 | 79,620,347  | 7.7E-09  | 0.222 | 0.209 |          |       |     | <i>PDE6G</i>     | 5'UTR   |

|            |    |             |          |       |       |            |       |  |                 |         |
|------------|----|-------------|----------|-------|-------|------------|-------|--|-----------------|---------|
| cg24332783 | 11 | 31,818,791  | 0.00124  | 0.222 | 0.230 |            |       |  | <i>PAX6</i>     | Body    |
| cg12406559 | 18 | 56,530,302  | 4.2E-07  | 0.222 | 0.138 | 2.78E-08   | 0.124 |  | <i>ZNF532</i>   | 1stExon |
| cg17316316 | 5  | 180,525,108 | 0.034864 | 0.222 | 0.216 |            |       |  |                 |         |
| cg00873517 | 8  | 136,511,832 | 3.03E-06 | 0.222 | 0.248 |            |       |  | <i>KHDRBS3</i>  | Body    |
| cg04330449 | 5  | 134,871,166 | 0.039637 | 0.222 | 0.260 | 0.00035374 | 0.080 |  | <i>NEUROG1</i>  | 1stExon |
| cg05813297 | 8  | 82,543,035  | 0.000329 | 0.222 | 0.210 |            |       |  |                 |         |
| cg11202345 | 17 | 76,976,057  | 0.0015   | 0.222 | 0.180 |            |       |  | <i>LGALS3BP</i> | 1stExon |
| cg23528975 | 2  | 128,403,133 | 1.09E-26 | 0.222 | 0.212 |            |       |  | <i>LIMS2</i>    | Body    |
| cg12047391 | 1  | 160,957,458 | 4.74E-07 | 0.222 | 0.240 |            |       |  |                 |         |
| cg13450266 | 13 | 113,625,160 | 5.9E-22  | 0.222 | 0.223 |            |       |  | <i>MCF2L</i>    | Body    |
| cg14254480 | 2  | 26,927,693  | 3.2E-14  | 0.222 | 0.218 |            |       |  | <i>KCNK3</i>    | Body    |
| cg14553895 | 3  | 178,899,170 | 1.37E-05 | 0.222 | 0.232 |            |       |  | <i>PIK3CA</i>   | 5'UTR   |
| cg19926444 | 19 | 12,624,742  | 7.48E-06 | 0.222 | 0.245 |            |       |  | <i>ZNF709</i>   | TSS200  |
| cg25316769 | 5  | 72,607,540  | 0.000103 | 0.222 | 0.190 |            |       |  |                 |         |
| cg27315742 | 6  | 117,586,681 | 0.000831 | 0.222 | 0.252 |            |       |  | <i>VGLL2</i>    | TSS200  |
| cg04039799 | 11 | 19,745,484  | 0.004653 | 0.222 | 0.181 |            |       |  | <i>NAV2</i>     | Body    |
| cg11203512 | 11 | 93,064,092  | 0.000822 | 0.222 | 0.171 |            |       |  | <i>CCDC67</i>   | 5'UTR   |
| cg24028260 | 6  | 139,899,284 | 1.22E-17 | 0.222 | 0.223 |            |       |  |                 |         |
| cg25836567 | 17 | 44,929,689  | 0.002025 | 0.222 | 0.185 |            |       |  | <i>WNT9B</i>    | Body    |
| cg26898166 | 2  | 73,143,799  | 6.96E-05 | 0.222 | 0.245 | 2.85E-20   | 0.162 |  | <i>EMX1</i>     | TSS1500 |
| cg00024443 | 16 | 21,569,473  | 3.38E-06 | 0.222 | 0.221 |            |       |  |                 |         |
| cg02882375 | 11 | 34,517,751  | 7.18E-13 | 0.222 | 0.219 |            |       |  | <i>ELF5</i>     | Body    |
| cg06834637 | 18 | 9,017,502   | 0.001041 | 0.222 | 0.190 |            |       |  |                 |         |
| cg17421417 | 5  | 92,934,644  | 7.61E-07 | 0.222 | 0.208 |            |       |  |                 |         |
| cg08461760 | 7  | 25,703,644  | 1.73E-06 | 0.222 | 0.242 |            |       |  |                 |         |
| cg16968985 | 17 | 27,313,254  | 0.006994 | 0.222 | 0.131 |            |       |  | <i>SEZ6</i>     | Body    |
| cg04513549 | 10 | 1,651,238   | 0.006531 | 0.222 | 0.218 |            |       |  | <i>ADARB2</i>   | Body    |
| cg13262467 | 3  | 169,538,890 | 1.14E-12 | 0.222 | 0.243 |            |       |  | <i>LRRIQ4</i>   | TSS1500 |
| cg13713830 | 9  | 79,631,737  | 0.000288 | 0.222 | 0.193 |            |       |  |                 |         |
| cg17583077 | 7  | 108,097,436 | 0.000853 | 0.222 | 0.181 |            |       |  | <i>NRCAM</i>    | TSS1500 |
| cg25217100 | 13 | 37,249,426  | 0.000606 | 0.222 | 0.249 |            |       |  | <i>C13orf36</i> | 5'UTR   |
| cg05657792 | 17 | 6,899,758   | 0.000163 | 0.222 | 0.169 |            |       |  | <i>ALOX12</i>   | Body    |
| cg07033292 | 15 | 78,287,690  | 9.26E-16 | 0.222 | 0.198 |            |       |  | <i>TBC1D2B</i>  | 3'UTR   |
| cg14317639 | 14 | 92,721,505  | 0.000386 | 0.222 | 0.182 |            |       |  |                 |         |

|            |    |             |          |       |       |  |  |  |                 |         |
|------------|----|-------------|----------|-------|-------|--|--|--|-----------------|---------|
| cg07722722 | 1  | 45,187,551  | 2.7E-09  | 0.222 | 0.210 |  |  |  | <i>C1orf228</i> | Body    |
| cg10892950 | 12 | 45,626,938  | 0.001132 | 0.222 | 0.191 |  |  |  | <i>ANO6</i>     | Body    |
| cg14829606 | 6  | 166,579,974 | 0.00036  | 0.222 | 0.240 |  |  |  | <i>T</i>        | Body    |
| cg05512561 | 13 | 33,925,656  | 6.83E-05 | 0.222 | 0.197 |  |  |  |                 |         |
| cg16142218 | 8  | 23,101,221  | 2.55E-09 | 0.222 | 0.196 |  |  |  | <i>CHMP7</i>    | 1stExon |
| cg26315862 | 13 | 21,520,519  | 7.71E-06 | 0.222 | 0.208 |  |  |  |                 |         |
| cg07711397 | 10 | 82,297,615  | 8.57E-17 | 0.222 | 0.214 |  |  |  | <i>SH2D4B</i>   | TSS200  |
| cg09035882 | 20 | 50,720,331  | 2.24E-06 | 0.222 | 0.241 |  |  |  | <i>ZFP64</i>    | Body    |
| cg02103924 | 1  | 110,672,857 | 8.78E-05 | 0.222 | 0.182 |  |  |  |                 |         |
| cg10158997 | 6  | 31,734,106  | 1.9E-14  | 0.222 | 0.209 |  |  |  | <i>C6orf27</i>  | Body    |
| cg22749589 | 20 | 21,501,710  | 0.013072 | 0.222 | 0.218 |  |  |  |                 |         |
| cg06875227 | 5  | 50,683,378  | 0.020304 | 0.222 | 0.277 |  |  |  | <i>ISL1</i>     | Body    |
| cg02056653 | 5  | 140,888,468 | 1.05E-05 | 0.222 | 0.208 |  |  |  | <i>PCDHGA4</i>  | Body    |
| cg06857304 | 10 | 94,826,314  | 1.4E-11  | 0.222 | 0.195 |  |  |  | <i>CYP26C1</i>  | Body    |
| cg10160276 | 16 | 52,583,062  | 5.43E-05 | 0.222 | 0.160 |  |  |  | <i>TOX3</i>     | TSS1500 |
| cg19719391 | 4  | 26,789,915  | 7.5E-08  | 0.222 | 0.216 |  |  |  |                 |         |
| cg20722210 | 5  | 134,827,136 | 7.96E-09 | 0.222 | 0.195 |  |  |  |                 |         |
| cg27044570 | X  | 111,325,176 | 0.000002 | 0.222 | 0.207 |  |  |  | <i>TRPC5</i>    | 5'UTR   |
| cg21331088 | 18 | 908,290     | 0.025012 | 0.222 | 0.219 |  |  |  | <i>ADCYAP1</i>  | Body    |
| cg00328729 | 11 | 45,231,175  | 1.57E-20 | 0.222 | 0.214 |  |  |  | <i>PRDM11</i>   | Body    |
| cg03866607 | 17 | 59,532,826  | 1.33E-07 | 0.222 | 0.190 |  |  |  | <i>TBX4</i>     | TSS1500 |
| cg26517714 | 5  | 170,736,245 | 0.002205 | 0.222 | 0.246 |  |  |  | <i>TLX3</i>     | TSS200  |
| cg26585701 | 6  | 30,418,565  | 1.11E-05 | 0.222 | 0.197 |  |  |  |                 |         |
| cg04410715 | 19 | 39,283,334  | 4.57E-06 | 0.222 | 0.213 |  |  |  |                 |         |
| cg09408098 | 1  | 170,631,331 | 0.000788 | 0.222 | 0.196 |  |  |  |                 |         |
| cg16659284 | 16 | 12,189,952  | 1.03E-12 | 0.222 | 0.223 |  |  |  | <i>SNX29</i>    | Body    |
| cg03978242 | 17 | 40,822,497  | 3.98E-09 | 0.222 | 0.192 |  |  |  | <i>PLEKHH3</i>  | Body    |
| cg05234035 | 5  | 172,673,203 | 1.91E-10 | 0.222 | 0.216 |  |  |  |                 |         |
| cg26312951 | 21 | 42,797,847  | 1.07E-10 | 0.222 | 0.194 |  |  |  | <i>MX1</i>      | TSS200  |
| cg05238917 | 6  | 28,504,946  | 1.79E-05 | 0.222 | 0.208 |  |  |  |                 |         |
| cg07809831 | 16 | 48,428,016  | 1.6E-11  | 0.222 | 0.210 |  |  |  |                 |         |
| cg09246479 | 22 | 24,891,129  | 0.04913  | 0.222 | 0.242 |  |  |  | <i>C22orf45</i> | TSS1500 |
| cg20803910 | 17 | 6,659,375   | 0.009508 | 0.222 | 0.192 |  |  |  | <i>XAF1</i>     | 5'UTR   |
| cg07723251 | 17 | 50,237,742  | 0.007794 | 0.222 | 0.243 |  |  |  | <i>CA10</i>     | TSS1500 |

|            |    |             |          |       |       |          |       |  |                 |         |
|------------|----|-------------|----------|-------|-------|----------|-------|--|-----------------|---------|
| cg17786206 | 1  | 29,142,254  | 2.55E-09 | 0.222 | 0.244 |          |       |  | <i>OPRD1</i>    | Body    |
| cg01169778 | 9  | 136,038,690 | 1.22E-16 | 0.222 | 0.229 | 2.87E-22 | 0.173 |  | <i>GBGT1</i>    | 5'UTR   |
| cg04317047 | 5  | 148,808,388 | 0.000195 | 0.222 | 0.269 |          |       |  | <i>MIR143</i>   | TSS200  |
| cg10987840 | 2  | 9,319,526   | 0.029174 | 0.222 | 0.156 |          |       |  |                 |         |
| cg14355482 | 21 | 22,373,039  | 9.45E-05 | 0.222 | 0.146 |          |       |  | <i>NCAM2</i>    | Body    |
| cg17826594 | 1  | 55,506,014  | 0.004303 | 0.222 | 0.288 |          |       |  | <i>PCSK9</i>    | Body    |
| cg27365701 | 12 | 89,744,150  | 1.44E-08 | 0.222 | 0.228 |          |       |  | <i>DUSP6</i>    | Body    |
| cg22325764 | 8  | 1,959,442   | 0.002175 | 0.222 | 0.100 |          |       |  |                 |         |
| cg15801007 | 6  | 131,383,376 | 8.75E-05 | 0.222 | 0.225 |          |       |  | <i>EPB41L2</i>  | 5'UTR   |
| cg04130163 | 4  | 42,401,214  | 0.000636 | 0.222 | 0.222 |          |       |  | <i>SHISA3</i>   | Body    |
| cg04352305 | 17 | 80,654,922  | 6.97E-05 | 0.222 | 0.156 |          |       |  | <i>RAB40B</i>   | Body    |
| cg17828255 | X  | 40,435,744  | 2.4E-09  | 0.222 | 0.211 |          |       |  |                 |         |
| cg11613003 | 2  | 202,901,288 | 5.41E-05 | 0.222 | 0.225 |          |       |  | <i>FZD7</i>     | 1stExon |
| cg17547578 | X  | 102,983,589 | 1.11E-05 | 0.222 | 0.234 |          |       |  | <i>GLRA4</i>    | TSS200  |
| cg27478485 | 12 | 6,898,682   | 7.85E-07 | 0.222 | 0.206 |          |       |  | <i>CD4</i>      | 5'UTR   |
| cg00988346 | 1  | 27,729,801  | 6.33E-06 | 0.222 | 0.262 |          |       |  |                 |         |
| cg09983301 | 2  | 69,404,831  | 0.000324 | 0.222 | 0.216 |          |       |  | <i>ANTXR1</i>   | Body    |
| cg02909136 | 20 | 44,941,542  | 0.001881 | 0.222 | 0.148 |          |       |  |                 |         |
| cg04964944 | 21 | 27,012,878  | 0.031718 | 0.222 | 0.227 |          |       |  | <i>JAM2</i>     | Body    |
| cg17496661 | 5  | 3,326,343   | 2.7E-15  | 0.222 | 0.176 |          |       |  |                 |         |
| cg20654074 | 15 | 41,223,179  | 1.1E-05  | 0.222 | 0.195 |          |       |  | <i>DLL4</i>     | Body    |
| cg20858454 | 11 | 4,010,737   | 2.06E-11 | 0.222 | 0.221 |          |       |  | <i>STIM1</i>    | Body    |
| cg24553673 | 1  | 200,005,453 | 0.005121 | 0.222 | 0.242 |          |       |  | <i>NR5A2</i>    | Body    |
| cg08062338 | 3  | 181,428,669 | 2.47E-06 | 0.222 | 0.203 |          |       |  | <i>SOX2OT</i>   | Body    |
| cg14355911 | 17 | 59,473,456  | 1.63E-07 | 0.222 | 0.215 |          |       |  |                 |         |
| cg25401612 | 12 | 20,009,446  | 4.19E-07 | 0.222 | 0.233 |          |       |  |                 |         |
| cg09619598 | 9  | 115,512,530 | 4.51E-06 | 0.221 | 0.206 |          |       |  | <i>SNX30</i>    | TSS1500 |
| cg22675791 | 11 | 46,370,729  | 9.5E-09  | 0.221 | 0.197 |          |       |  | <i>DGKZ</i>     | Body    |
| cg03853809 | 1  | 220,863,382 | 0.010651 | 0.221 | 0.107 |          |       |  | <i>C1orf115</i> | TSS1500 |
| cg24351901 | 6  | 29,692,092  | 1.24E-05 | 0.221 | 0.216 |          |       |  | <i>HLA-F</i>    | Body    |
| cg25841265 | 4  | 6,660,482   | 2.14E-16 | 0.221 | 0.227 |          |       |  |                 |         |
| cg02689072 | 4  | 802,844     | 5.34E-07 | 0.221 | 0.216 |          |       |  | <i>CPLX1</i>    | Body    |
| cg03339668 | 12 | 120,241,957 | 5.28E-15 | 0.221 | 0.228 |          |       |  | <i>CIT</i>      | Body    |
| cg04462652 | 2  | 133,429,088 | 1.51E-06 | 0.221 | 0.235 |          |       |  | <i>LYPD1</i>    | TSS1500 |

|            |    |             |          |       |       |            |       |     |  |                 |         |
|------------|----|-------------|----------|-------|-------|------------|-------|-----|--|-----------------|---------|
| cg14327394 | 9  | 116,337,285 | 4.85E-15 | 0.221 | 0.197 |            |       |     |  | <i>RGS3</i>     | Body    |
| cg15388804 | 14 | 36,993,079  | 5.16E-07 | 0.221 | 0.234 |            |       |     |  |                 |         |
| cg18040878 | 12 | 54,409,229  | 0.016286 | 0.221 | 0.233 |            |       |     |  | <i>HOXC4</i>    | TSS1500 |
| cg07337290 | 16 | 28,505,320  | 7.61E-08 | 0.221 | 0.217 |            |       |     |  | <i>APOB48R</i>  | TSS1500 |
| cg21255939 | X  | 9,858,802   | 2.09E-21 | 0.221 | 0.205 |            |       |     |  | <i>SHROOM2</i>  | Body    |
| cg04678916 | 2  | 54,900,910  | 0.000157 | 0.221 | 0.210 |            |       |     |  |                 |         |
| cg09410389 | 8  | 41,168,205  | 7.44E-11 | 0.221 | 0.193 |            |       |     |  | <i>SFRP1</i>    | TSS1500 |
| cg13710662 | 7  | 150,896,489 | 9.77E-09 | 0.221 | 0.212 |            |       |     |  |                 |         |
| cg14870271 | 17 | 76,976,010  | 0.00096  | 0.221 | 0.182 | 6.35E-23   | 0.162 | Yes |  | <i>LGALS3BP</i> | 1stExon |
| cg04415672 | 12 | 58,237,706  | 6.19E-13 | 0.221 | 0.222 |            |       |     |  | <i>CTDSP2</i>   | Body    |
| cg14726488 | 6  | 137,815,572 | 0.016227 | 0.221 | 0.255 |            |       |     |  | <i>OLIG3</i>    | TSS200  |
| cg17627654 | 11 | 70,508,410  | 1.93E-10 | 0.221 | 0.215 |            |       |     |  | <i>SHANK2</i>   | Body    |
| cg22933847 | 11 | 68,780,136  | 2.54E-08 | 0.221 | 0.197 | 0.00257397 | 0.036 |     |  | <i>MRGPRF</i>   | 5'UTR   |
| cg24042578 | 1  | 2,066,981   | 7.02E-07 | 0.221 | 0.182 |            |       |     |  | <i>PRKCZ</i>    | 5'UTR   |
| cg02079034 | 6  | 150,589,148 | 0.009759 | 0.221 | 0.166 |            |       |     |  |                 |         |
| cg07464206 | 11 | 15,960,015  | 4.46E-13 | 0.221 | 0.187 |            |       |     |  |                 |         |
| cg11562411 | 6  | 35,206,618  | 6.84E-07 | 0.221 | 0.228 |            |       |     |  | <i>SCUBE3</i>   | Body    |
| cg03558222 | X  | 47,483,257  | 0.033021 | 0.221 | 0.067 |            |       |     |  |                 |         |
| cg01550055 | 1  | 119,543,216 | 3.23E-05 | 0.221 | 0.228 |            |       |     |  |                 |         |
| cg22185065 | 6  | 6,318,785   | 5.97E-05 | 0.221 | 0.227 |            |       |     |  | <i>F13A1</i>    | Body    |
| cg16331358 | 10 | 1,147,675   | 0.00833  | 0.221 | 0.212 |            |       |     |  | <i>WDR37</i>    | Body    |
| cg24076474 | 19 | 11,531,344  | 0.012838 | 0.221 | 0.288 |            |       |     |  | <i>RGL3</i>     | TSS1500 |
| cg10172432 | 13 | 95,357,042  | 2.84E-06 | 0.221 | 0.204 |            |       |     |  |                 |         |
| cg00093080 | 12 | 117,421,224 | 3.97E-12 | 0.221 | 0.224 |            |       |     |  | <i>FBXW8</i>    | Body    |
| cg25138553 | 1  | 22,223,841  | 3.46E-09 | 0.221 | 0.199 |            |       |     |  | <i>HSPG2</i>    | Body    |
| cg00644823 | 1  | 91,301,461  | 0.002037 | 0.221 | 0.233 |            |       |     |  |                 |         |
| cg07628705 | 14 | 51,339,074  | 2.55E-05 | 0.221 | 0.207 |            |       |     |  | <i>ABHD12B</i>  | 5'UTR   |
| cg17476701 | 6  | 30,651,563  | 1.09E-05 | 0.221 | 0.217 |            |       |     |  | <i>KIAA1949</i> | Body    |
| cg05097643 | 16 | 3,018,470   | 0.020156 | 0.221 | 0.123 |            |       |     |  | <i>PAQR4</i>    | TSS1500 |
| cg16866941 | 22 | 38,601,325  | 1.38E-07 | 0.221 | 0.251 |            |       |     |  | <i>MAFF</i>     | 5'UTR   |
| cg20713092 | 7  | 100,946,111 | 0.026448 | 0.221 | 0.228 |            |       |     |  |                 |         |
| cg15720089 | 10 | 18,550,223  | 7.85E-07 | 0.221 | 0.222 |            |       |     |  | <i>CACNB2</i>   | Body    |
| cg12806763 | 17 | 46,655,836  | 0.001107 | 0.221 | 0.262 |            |       |     |  | <i>HOXB4</i>    | TSS200  |
| cg23477348 | 21 | 45,564,615  | 6.96E-06 | 0.221 | 0.233 |            |       |     |  | <i>C21orf33</i> | Body    |



|            |    |             |          |       |       |          |       |  |                 |         |
|------------|----|-------------|----------|-------|-------|----------|-------|--|-----------------|---------|
| cg01446515 | 13 | 20,805,443  | 3.79E-06 | 0.221 | 0.203 |          |       |  | <i>GJB6</i>     | 5'UTR   |
| cg16120415 | 1  | 156,399,787 | 0.000614 | 0.221 | 0.304 |          |       |  | <i>C1orf61</i>  | TSS1500 |
| cg00381755 | 16 | 30,572,815  | 0.003901 | 0.221 | 0.207 |          |       |  |                 |         |
| cg09515921 | 1  | 221,057,558 | 1.54E-22 | 0.221 | 0.228 |          |       |  | <i>HLX</i>      | Body    |
| cg02586730 | 11 | 65,639,869  | 1.98E-13 | 0.221 | 0.223 | 1.25E-19 | 0.169 |  | <i>EFEMP2</i>   | 5'UTR   |
| cg04253876 | 2  | 30,453,758  | 1.29E-05 | 0.221 | 0.206 |          |       |  | <i>LBH</i>      | TSS1500 |
| cg20305024 | 15 | 40,575,730  | 1.34E-06 | 0.221 | 0.216 |          |       |  |                 |         |
| cg06653004 | 6  | 50,785,325  | 0.002495 | 0.221 | 0.290 |          |       |  | <i>TFAP2B</i>   | TSS1500 |
| cg25980637 | 1  | 16,163,967  | 2.72E-06 | 0.221 | 0.205 |          |       |  | <i>FLJ37453</i> | Body    |
| cg27419860 | 15 | 81,426,477  | 0.017744 | 0.221 | 0.132 |          |       |  | <i>C15orf26</i> | TSS200  |
| cg27589809 | 3  | 50,650,410  | 9.58E-12 | 0.221 | 0.208 |          |       |  | <i>CISH</i>     | TSS1500 |
| cg08272286 | 15 | 33,486,937  | 0.028764 | 0.221 | 0.207 |          |       |  |                 |         |
| cg00192220 | 16 | 48,570,215  | 2.82E-13 | 0.221 | 0.200 |          |       |  |                 |         |
| cg00332937 | 5  | 72,740,460  | 0.000616 | 0.221 | 0.166 |          |       |  |                 |         |
| cg15160686 | 1  | 24,562,825  | 3.42E-09 | 0.221 | 0.217 |          |       |  |                 |         |
| cg04316624 | 2  | 177,036,809 | 5.28E-05 | 0.221 | 0.203 |          |       |  | <i>HOXD3</i>    | Body    |
| cg11430259 | 10 | 123,355,748 | 2.05E-05 | 0.221 | 0.191 |          |       |  | <i>FGFR2</i>    | 5'UTR   |
| cg13444518 | 9  | 135,466,773 | 3.6E-06  | 0.221 | 0.221 |          |       |  |                 |         |
| cg15397593 | 12 | 2,273,119   | 7.75E-09 | 0.221 | 0.222 |          |       |  | <i>CACNA1C</i>  | Body    |
| cg20559634 | 3  | 45,609,400  | 4.07E-06 | 0.221 | 0.213 |          |       |  |                 |         |
| cg24334438 | X  | 13,395,432  | 0.000118 | 0.221 | 0.252 |          |       |  |                 |         |
| cg04492228 | 10 | 8,101,513   | 0.001544 | 0.221 | 0.223 |          |       |  | <i>GATA3</i>    | Body    |
| cg19750282 | 6  | 43,670,519  | 2.52E-09 | 0.221 | 0.212 |          |       |  |                 |         |
| cg24251218 | 11 | 10,347,429  | 2.44E-06 | 0.221 | 0.222 |          |       |  |                 |         |
| cg03936495 | 17 | 59,539,251  | 5.15E-05 | 0.221 | 0.199 |          |       |  | <i>TBX4</i>     | Body    |
| cg06252276 | 11 | 34,852,392  | 2.05E-26 | 0.221 | 0.221 |          |       |  |                 |         |
| cg07276534 | 3  | 193,534,580 | 0.001092 | 0.221 | 0.208 |          |       |  |                 |         |
| cg07892413 | 2  | 129,076,032 | 1.44E-06 | 0.221 | 0.180 |          |       |  | <i>HS6ST1</i>   | 1stExon |
| cg11713658 | 4  | 148,652,434 | 4.43E-05 | 0.221 | 0.222 |          |       |  | <i>ARHGAP10</i> | TSS1500 |
| cg14007090 | 20 | 60,915,009  | 2.89E-12 | 0.221 | 0.209 |          |       |  | <i>LAMA5</i>    | Body    |
| cg04945350 | 1  | 228,605,010 | 0.000621 | 0.221 | 0.246 |          |       |  | <i>TRIM17</i>   | TSS1500 |
| cg10914899 | 13 | 25,290,781  | 3.37E-06 | 0.221 | 0.225 |          |       |  |                 |         |
| cg17666539 | 19 | 7,927,207   | 1.45E-09 | 0.221 | 0.214 |          |       |  | <i>EVI5L</i>    | Body    |
| cg23655970 | 14 | 37,126,582  | 0.000167 | 0.221 | 0.232 |          |       |  | <i>PAX9</i>     | TSS200  |

|            |    |             |          |       |       |            |       |  |                  |         |
|------------|----|-------------|----------|-------|-------|------------|-------|--|------------------|---------|
| cg26316946 | 6  | 101,846,967 | 1.29E-06 | 0.221 | 0.198 | 0.00581339 | 0.047 |  | <i>GRIK2</i>     | 1stExon |
| cg27196745 | 12 | 15,475,319  | 0.000739 | 0.221 | 0.177 | 2.22E-26   | 0.189 |  | <i>PTPRO</i>     | TSS200  |
| cg09940675 | 1  | 54,742,754  | 3.46E-19 | 0.221 | 0.198 |            |       |  | <i>SSBP3</i>     | Body    |
| cg23017915 | 3  | 149,374,535 | 0.007485 | 0.221 | 0.149 |            |       |  | <i>WWTR1</i>     | Body    |
| cg07699845 | 8  | 38,068,205  | 1.35E-08 | 0.221 | 0.224 |            |       |  | <i>BAG4</i>      | 3'UTR   |
| cg11251135 | 17 | 1,863,911   | 5.72E-12 | 0.221 | 0.211 |            |       |  | <i>RTN4RL1</i>   | Body    |
| cg27620317 | 7  | 25,900,768  | 0.001607 | 0.221 | 0.174 |            |       |  |                  |         |
| cg04231050 | 3  | 133,191,297 | 2.47E-06 | 0.221 | 0.177 |            |       |  | <i>BFSP2</i>     | Body    |
| cg26845297 | 4  | 85,422,409  | 0.004786 | 0.221 | 0.204 |            |       |  |                  |         |
| cg14149988 | 9  | 139,048,519 | 0.003347 | 0.221 | 0.204 |            |       |  |                  |         |
| cg15203566 | 5  | 115,697,446 | 1.94E-10 | 0.221 | 0.227 |            |       |  |                  |         |
| cg18886245 | 6  | 50,792,868  | 0.014001 | 0.221 | 0.224 |            |       |  | <i>TFAP2B</i>    | Body    |
| cg18958126 | 13 | 100,547,367 | 0.033455 | 0.221 | 0.139 |            |       |  | <i>CLYBL</i>     | 3'UTR   |
| cg27416261 | 9  | 35,406,590  | 6.83E-05 | 0.221 | 0.153 |            |       |  | <i>LOC158381</i> | TSS200  |
| cg03204678 | 6  | 26,614,535  | 0.047017 | 0.221 | 0.184 |            |       |  |                  |         |
| cg03475821 | 14 | 105,288,120 | 4.83E-08 | 0.221 | 0.195 |            |       |  | <i>MGC23270</i>  | Body    |
| cg11512289 | 4  | 165,898,912 | 1.51E-05 | 0.221 | 0.199 |            |       |  | <i>TRIM61</i>    | TSS200  |
| cg05036173 | 2  | 108,994,528 | 2.4E-05  | 0.221 | 0.180 |            |       |  | <i>SULT1C4</i>   | 5'UTR   |
| cg17409313 | 20 | 42,876,939  | 0.000822 | 0.221 | 0.172 |            |       |  | <i>GDAP1L1</i>   | Body    |
| cg01142526 | 5  | 177,541,754 | 0.004891 | 0.221 | 0.240 |            |       |  | <i>N4BP3</i>     | 5'UTR   |
| cg14517390 | 15 | 78,463,330  | 2.48E-10 | 0.221 | 0.218 |            |       |  | <i>ACSBG1</i>    | 3'UTR   |
| cg18604823 | 19 | 56,687,364  | 0.002475 | 0.221 | 0.286 |            |       |  | <i>GALP</i>      | TSS200  |
| cg21766667 | 17 | 48,287,888  | 8.16E-05 | 0.221 | 0.189 |            |       |  |                  |         |
| cg02212009 | 11 | 12,820,860  | 0.004231 | 0.221 | 0.138 |            |       |  | <i>TEAD1</i>     | Body    |
| cg08203127 | 16 | 331,727     | 0.009983 | 0.221 | 0.265 |            |       |  | <i>ARHGDIG</i>   | Body    |
| cg12098750 | 12 | 99,548,757  | 2.19E-10 | 0.221 | 0.196 |            |       |  | <i>ANKS1B</i>    | TSS1500 |
| cg13633270 | 18 | 55,095,555  | 0.000758 | 0.221 | 0.216 |            |       |  |                  |         |
| cg23034757 | 5  | 140,787,864 | 0.001657 | 0.221 | 0.238 |            |       |  | <i>PCDHGA4</i>   | Body    |
| cg06708634 | 6  | 100,906,895 | 0.000814 | 0.221 | 0.159 |            |       |  | <i>SIM1</i>      | Body    |
| cg18586823 | 5  | 114,525,702 | 0.00012  | 0.221 | 0.204 |            |       |  |                  |         |
| cg13655803 | 17 | 48,912,764  | 5.05E-08 | 0.221 | 0.207 |            |       |  | <i>WFIKKN2</i>   | 1stExon |
| cg18454299 | 15 | 44,959,064  | 1.21E-06 | 0.221 | 0.230 |            |       |  | <i>PATL2</i>     | Body    |
| cg21285198 | 1  | 1,360,970   | 2.99E-12 | 0.221 | 0.228 |            |       |  | <i>TMEM88B</i>   | TSS1500 |
| cg02116942 | 2  | 69,519,143  | 4.39E-12 | 0.221 | 0.221 |            |       |  |                  |         |

|            |    |             |          |       |       |          |       |  |                 |         |
|------------|----|-------------|----------|-------|-------|----------|-------|--|-----------------|---------|
| cg05113410 | 2  | 102,327,511 | 2.19E-08 | 0.221 | 0.213 |          |       |  | <i>MAP4K4</i>   | Body    |
| cg09074113 | 2  | 20,870,087  | 1.66E-17 | 0.221 | 0.214 |          |       |  | <i>GDF7</i>     | Body    |
| cg15528028 | 1  | 33,828,944  | 4.37E-05 | 0.221 | 0.217 |          |       |  | <i>PHC2</i>     | Body    |
| cg17119907 | 12 | 117,797,116 | 4.94E-07 | 0.221 | 0.210 |          |       |  | <i>NOS1</i>     | 5'UTR   |
| cg18707489 | 14 | 104,690,151 | 1.2E-06  | 0.221 | 0.212 |          |       |  |                 |         |
| cg25260137 | 8  | 65,282,185  | 0.014756 | 0.221 | 0.270 |          |       |  |                 |         |
| cg27102297 | 16 | 88,966,903  | 5.87E-24 | 0.221 | 0.211 |          |       |  | <i>CBFA2T3</i>  | Body    |
| cg05325193 | 20 | 22,558,233  | 0.035544 | 0.221 | 0.175 |          |       |  | <i>C20orf56</i> | Body    |
| cg10785340 | 5  | 134,715,577 | 8.55E-11 | 0.221 | 0.213 |          |       |  | <i>H2AFY</i>    | Body    |
| cg19522511 | 3  | 105,073,077 | 2.67E-07 | 0.221 | 0.228 |          |       |  |                 |         |
| cg27349333 | 10 | 5,406,971   | 0.015502 | 0.221 | 0.184 |          |       |  | <i>UCN3</i>     | TSS200  |
| cg02916272 | 11 | 1,769,443   | 0.003483 | 0.221 | 0.193 |          |       |  | <i>HCCA2</i>    | Body    |
| cg16328007 | 1  | 41,119,988  | 0.007485 | 0.221 | 0.266 |          |       |  | <i>RIMS3</i>    | 5'UTR   |
| cg02023167 | 11 | 19,264,191  | 5.09E-07 | 0.221 | 0.214 |          |       |  |                 |         |
| cg04259326 | 1  | 167,599,124 | 0.00046  | 0.221 | 0.177 |          |       |  | <i>RCSD1</i>    | TSS1500 |
| cg05651511 | 17 | 78,754,090  | 1.94E-10 | 0.221 | 0.216 |          |       |  | <i>RPTOR</i>    | Body    |
| cg11977605 | 4  | 1,076,247   | 4.27E-05 | 0.221 | 0.283 |          |       |  | <i>RNF212</i>   | Body    |
| cg00544337 | 10 | 82,116,203  | 0.000162 | 0.221 | 0.166 |          |       |  | <i>DYDC2</i>    | TSS1500 |
| cg00793935 | 2  | 234,847,769 | 0.026163 | 0.221 | 0.227 |          |       |  | <i>TRPM8</i>    | Body    |
| cg14215711 | 10 | 22,894,054  | 1.33E-09 | 0.221 | 0.217 |          |       |  | <i>PIP4K2A</i>  | Body    |
| cg18751141 | 7  | 27,138,173  | 0.018074 | 0.221 | 0.251 |          |       |  |                 |         |
| cg14206056 | 9  | 110,797,033 | 1.42E-11 | 0.221 | 0.204 |          |       |  |                 |         |
| cg16604801 | 17 | 2,718,310   | 1.69E-05 | 0.221 | 0.174 |          |       |  | <i>RAP1GAP2</i> | Body    |
| cg25296938 | 7  | 98,976,900  | 8.05E-06 | 0.221 | 0.221 |          |       |  | <i>ARPC1B</i>   | 5'UTR   |
| cg04299135 | 11 | 129,244,441 | 0.001247 | 0.221 | 0.239 |          |       |  | <i>BARX2</i>    | TSS1500 |
| cg00054210 | 8  | 65,711,644  | 0.000798 | 0.221 | 0.107 |          |       |  | <i>CYP7B1</i>   | TSS1500 |
| cg05441133 | 10 | 48,416,891  | 1.18E-05 | 0.221 | 0.226 | 2.25E-07 | 0.070 |  | <i>GDF2</i>     | TSS200  |
| cg16026922 | 4  | 41,259,044  | 0.000104 | 0.221 | 0.212 |          |       |  | <i>UCHL1</i>    | Body    |
| cg00175709 | 1  | 207,670,014 | 0.001077 | 0.221 | 0.258 |          |       |  | <i>CR1</i>      | Body    |
| cg03444722 | 2  | 112,375,854 | 2.63E-11 | 0.221 | 0.227 |          |       |  |                 |         |
| cg08198193 | 5  | 81,146,787  | 1.56E-05 | 0.221 | 0.226 |          |       |  |                 |         |
| cg18222759 | 14 | 22,989,081  | 2.97E-12 | 0.221 | 0.227 |          |       |  |                 |         |
| cg24127874 | 2  | 239,149,859 | 0.019499 | 0.221 | 0.259 | 1.16E-07 | 0.136 |  | <i>HES6</i>     | TSS1500 |
| cg24421906 | 18 | 11,947,936  | 0.004665 | 0.221 | 0.245 |          |       |  |                 |         |

|            |    |             |          |       |       |          |       |  |     |                  |         |
|------------|----|-------------|----------|-------|-------|----------|-------|--|-----|------------------|---------|
| cg24602417 | 8  | 102,236,283 | 1.64E-14 | 0.221 | 0.215 |          |       |  |     |                  |         |
| cg09112081 | 16 | 29,796,620  | 3.19E-06 | 0.221 | 0.229 |          |       |  |     |                  |         |
| cg10508760 | 1  | 166,853,789 | 0.021322 | 0.221 | 0.182 |          |       |  |     |                  |         |
| cg15583029 | 10 | 134,446,066 | 6.25E-12 | 0.221 | 0.216 |          |       |  |     | <i>INPP5A</i>    | Body    |
| cg25228169 | 15 | 72,489,416  | 5.41E-15 | 0.221 | 0.199 |          |       |  |     | <i>GRAMD2</i>    | Body    |
| cg25962699 | 3  | 170,332,444 | 4.6E-05  | 0.221 | 0.191 |          |       |  |     |                  |         |
| cg02574464 | 16 | 57,940,653  | 1.75E-07 | 0.221 | 0.257 |          |       |  |     | <i>CNGB1</i>     | Body    |
| cg03310937 | 3  | 8,648,591   | 1.93E-06 | 0.221 | 0.181 |          |       |  |     |                  |         |
| cg24173049 | 17 | 6,939,795   | 0.012292 | 0.221 | 0.107 | 8.75E-21 | 0.161 |  |     | <i>SLC16A13</i>  | 1stExon |
| cg26534508 | 1  | 236,306,311 | 0.033604 | 0.221 | 0.084 | 2.26E-16 | 0.170 |  |     | <i>GPR137B</i>   | 1stExon |
| cg11964338 | 19 | 52,847,185  | 5.16E-20 | 0.221 | 0.220 |          |       |  |     | <i>ZNF610</i>    | 5'UTR   |
| cg12610312 | 12 | 109,162,409 | 1.16E-05 | 0.221 | 0.187 |          |       |  |     |                  |         |
| cg23856413 | 6  | 106,429,659 | 3.19E-06 | 0.221 | 0.205 |          |       |  |     |                  |         |
| cg00059737 | 1  | 12,400,434  | 8.93E-13 | 0.221 | 0.222 |          |       |  |     | <i>VPS13D</i>    | Body    |
| cg00597801 | 4  | 109,092,918 | 0.003496 | 0.221 | 0.234 |          |       |  |     | <i>LOC641518</i> | TSS1500 |
| cg15296664 | 12 | 89,748,773  | 4.5E-12  | 0.221 | 0.215 |          |       |  |     |                  |         |
| cg12659606 | 6  | 33,215,807  | 0.002147 | 0.221 | 0.219 |          |       |  |     |                  |         |
| cg27177841 | 1  | 213,125,950 | 4.66E-09 | 0.221 | 0.242 |          |       |  |     | <i>VASH2</i>     | Body    |
| cg01416891 | 10 | 94,820,892  | 3.22E-06 | 0.221 | 0.194 |          |       |  |     | <i>CYP26C1</i>   | TSS200  |
| cg21093033 | 8  | 141,468,743 | 0.035457 | 0.221 | 0.170 |          |       |  |     | <i>TRAPPC9</i>   | TSS1500 |
| cg09803764 | 7  | 107,572,753 | 7.61E-12 | 0.221 | 0.231 |          |       |  |     | <i>LAMB1</i>     | Body    |
| cg03011535 | 20 | 42,544,794  | 7.17E-06 | 0.221 | 0.235 |          |       |  |     | <i>TOX2</i>      | 5'UTR   |
| cg01750507 | 18 | 158,229     | 0.013761 | 0.221 | 0.178 |          |       |  |     | <i>USP14</i>     | TSS1500 |
| cg08110272 | 12 | 108,733,321 | 0.002815 | 0.221 | 0.230 |          |       |  |     | <i>CMKLR1</i>    | TSS1500 |
| cg09887323 | 1  | 6,348,460   | 1.13E-06 | 0.221 | 0.201 |          |       |  |     | <i>ACOT7</i>     | Body    |
| cg13042487 | 14 | 104,181,393 | 0.008552 | 0.221 | 0.120 | 1.21E-15 | 0.119 |  |     | <i>ZFYVE21</i>   | TSS1500 |
| cg14114377 | 19 | 45,756,845  | 1.07E-19 | 0.221 | 0.220 |          |       |  |     | <i>MARK4</i>     | Body    |
| cg14322298 | 6  | 10,585,683  | 1.79E-07 | 0.221 | 0.228 |          |       |  |     | <i>GCNT2</i>     | Body    |
| cg05588228 | 5  | 145,132,641 | 7.71E-05 | 0.221 | 0.115 |          |       |  |     |                  |         |
| cg10147974 | 12 | 1,759,064   | 7.73E-07 | 0.221 | 0.221 |          |       |  |     |                  |         |
| cg15335334 | 17 | 73,642,547  | 0.009005 | 0.221 | 0.161 |          |       |  |     | <i>RECQL5</i>    | Body    |
| cg22126440 | 7  | 120,628,658 | 0.000271 | 0.221 | 0.162 |          |       |  |     | <i>C7orf58</i>   | TSS1500 |
| cg08033998 | 14 | 69,714,389  | 7.23E-13 | 0.221 | 0.227 |          |       |  | Yes |                  |         |
| cg00469602 | 2  | 172,955,930 | 0.001492 | 0.221 | 0.229 |          |       |  |     |                  |         |

|            |    |             |          |       |       |            |       |  |                 |         |
|------------|----|-------------|----------|-------|-------|------------|-------|--|-----------------|---------|
| cg07671949 | 6  | 152,128,338 | 0.009134 | 0.221 | 0.202 | 0.00567154 | 0.060 |  | <i>ESR1</i>     | TSS1500 |
| cg01040654 | 5  | 172,663,219 | 1.1E-07  | 0.221 | 0.201 |            |       |  | <i>NKX2-5</i>   | TSS1500 |
| cg21874193 | 12 | 11,174,898  | 8.74E-11 | 0.221 | 0.250 | 5.06E-14   | 0.227 |  | <i>TAS2R19</i>  | 1stExon |
| cg02737384 | 10 | 45,470,199  | 0.04895  | 0.221 | 0.085 |            |       |  | <i>RASSF4</i>   | Body    |
| cg07106394 | 14 | 104,372,286 | 5.12E-09 | 0.221 | 0.216 |            |       |  |                 |         |
| cg03059420 | 6  | 30,923,241  | 0.007661 | 0.221 | 0.253 |            |       |  |                 |         |
| cg19376973 | 2  | 42,229,025  | 1.03E-09 | 0.221 | 0.197 |            |       |  |                 |         |
| cg27390220 | 3  | 45,268,523  | 1.3E-07  | 0.221 | 0.224 | 1.38E-12   | 0.140 |  | <i>TMEM158</i>  | TSS1500 |
| cg02239862 | 3  | 33,260,743  | 0.013595 | 0.221 | 0.155 |            |       |  | <i>SUSD5</i>    | TSS200  |
| cg06117072 | 6  | 50,791,385  | 7.26E-05 | 0.221 | 0.257 |            |       |  | <i>TFAP2B</i>   | Body    |
| cg10385101 | 7  | 707,728     | 0.030123 | 0.221 | 0.181 |            |       |  | <i>PRKAR1B</i>  | Body    |
| cg26144567 | 1  | 29,446,085  | 4.05E-19 | 0.221 | 0.213 |            |       |  | <i>EPB41</i>    | 3'UTR   |
| cg26514099 | 6  | 33,397,710  | 0.00026  | 0.221 | 0.256 |            |       |  | <i>SYNGAP1</i>  | Body    |
| cg03483626 | 1  | 111,218,276 | 3.51E-08 | 0.221 | 0.215 | 8.13E-11   | 0.174 |  | <i>KCNA3</i>    | TSS1500 |
| cg08748170 | 5  | 54,518,667  | 0.000144 | 0.221 | 0.207 |            |       |  |                 |         |
| cg13283635 | 20 | 61,450,653  | 8.64E-11 | 0.221 | 0.226 |            |       |  | <i>COL9A3</i>   | Body    |
| cg13555278 | 1  | 26,348,484  | 1.07E-11 | 0.221 | 0.216 |            |       |  | <i>EXTL1</i>    | 1stExon |
| cg03655371 | 5  | 134,827,355 | 0.003452 | 0.221 | 0.157 |            |       |  |                 |         |
| cg04702940 | 11 | 66,084,599  | 0.007127 | 0.221 | 0.265 |            |       |  | <i>CD248</i>    | TSS200  |
| cg09760908 | 2  | 45,028,712  | 0.02179  | 0.221 | 0.237 |            |       |  |                 |         |
| cg13636189 | 9  | 102,587,074 | 0.000713 | 0.221 | 0.159 |            |       |  | <i>NR4A3</i>    | 5'UTR   |
| cg14199723 | 8  | 145,051,795 | 7.43E-08 | 0.221 | 0.209 |            |       |  | <i>PLEC1</i>    | TSS1500 |
| cg18416881 | 7  | 134,143,823 | 0.020267 | 0.221 | 0.175 | 8.32E-15   | 0.197 |  | <i>AKR1B1</i>   | 5'UTR   |
| cg25957451 | 2  | 73,512,148  | 6.55E-06 | 0.221 | 0.215 |            |       |  |                 |         |
| cg02281167 | 6  | 30,140,113  | 1.52E-06 | 0.221 | 0.202 |            |       |  | <i>TRIM15</i>   | Body    |
| cg18780769 | 3  | 194,118,985 | 0.000124 | 0.221 | 0.170 |            |       |  | <i>GP5</i>      | Body    |
| cg19334350 | 7  | 157,406,737 | 9.56E-06 | 0.221 | 0.224 |            |       |  | <i>PTPRN2</i>   | Body    |
| cg08847856 | 2  | 106,184,698 | 2.48E-10 | 0.221 | 0.226 |            |       |  |                 |         |
| cg14568830 | 10 | 23,463,243  | 0.004649 | 0.221 | 0.152 |            |       |  |                 |         |
| cg00259249 | 1  | 35,246,726  | 3.31E-05 | 0.221 | 0.178 |            |       |  | <i>GJB3</i>     | TSS200  |
| cg15677384 | 7  | 96,648,043  | 0.01142  | 0.221 | 0.279 |            |       |  |                 |         |
| cg20660171 | 2  | 43,455,046  | 0.000728 | 0.221 | 0.135 |            |       |  | <i>ZFP36L2</i>  | TSS1500 |
| cg23547017 | 2  | 177,030,171 | 3.18E-06 | 0.221 | 0.166 |            |       |  | <i>HOXD3</i>    | 5'UTR   |
| cg25479916 | 6  | 27,841,392  | 0.047067 | 0.221 | 0.276 |            |       |  | <i>HIST1H4L</i> | TSS200  |

|            |    |             |          |       |       |  |  |  |                 |         |
|------------|----|-------------|----------|-------|-------|--|--|--|-----------------|---------|
| cg08058894 | 20 | 42,544,178  | 0.049591 | 0.220 | 0.191 |  |  |  | <i>TOX2</i>     | TSS1500 |
| cg19239040 | 7  | 35,298,664  | 2.3E-05  | 0.220 | 0.224 |  |  |  |                 |         |
| cg00727590 | 22 | 31,536,549  | 2.02E-05 | 0.220 | 0.242 |  |  |  | <i>PLA2G3</i>   | TSS200  |
| cg15345741 | 14 | 103,674,333 | 5.85E-06 | 0.220 | 0.182 |  |  |  |                 |         |
| cg00498289 | 2  | 27,719,787  | 1.69E-14 | 0.220 | 0.221 |  |  |  | <i>GCKR</i>     | 1stExon |
| cg12581592 | 11 | 13,984,043  | 0.001525 | 0.220 | 0.191 |  |  |  | <i>SPON1</i>    | 1stExon |
| cg17578322 | 3  | 55,546,118  | 2.74E-05 | 0.220 | 0.161 |  |  |  | <i>ERC2</i>     | 3'UTR   |
| cg20454400 | 17 | 46,720,386  | 1.17E-06 | 0.220 | 0.234 |  |  |  |                 |         |
| cg11414821 | 6  | 30,652,771  | 4.04E-06 | 0.220 | 0.216 |  |  |  | <i>KIAA1949</i> | Body    |
| cg13302994 | 2  | 210,714,233 | 0.002145 | 0.220 | 0.235 |  |  |  | <i>UNC80</i>    | Body    |
| cg24871887 | 9  | 98,111,365  | 2.07E-06 | 0.220 | 0.191 |  |  |  |                 |         |
| cg27499820 | 13 | 21,296,301  | 0.023751 | 0.220 | 0.087 |  |  |  | <i>IL17D</i>    | 3'UTR   |
| cg04623265 | 1  | 224,363,494 | 9.38E-17 | 0.220 | 0.216 |  |  |  |                 |         |
| cg05929675 | 7  | 28,452,098  | 0.00066  | 0.220 | 0.146 |  |  |  | <i>CREB5</i>    | 5'UTR   |
| cg15765502 | 7  | 20,816,521  | 7.18E-06 | 0.220 | 0.206 |  |  |  |                 |         |
| cg20003368 | 6  | 44,026,475  | 0.021508 | 0.220 | 0.303 |  |  |  |                 |         |
| cg26029221 | 1  | 12,653,721  | 2.06E-13 | 0.220 | 0.201 |  |  |  | <i>DHRS3</i>    | Body    |
| cg01952953 | 12 | 108,168,562 | 0.000348 | 0.220 | 0.212 |  |  |  | <i>ASCL4</i>    | 1stExon |
| cg07769790 | 15 | 83,317,281  | 3.11E-05 | 0.220 | 0.213 |  |  |  | <i>CPEB1</i>    | TSS1500 |
| cg13407335 | 17 | 7,832,852   | 3.8E-12  | 0.220 | 0.209 |  |  |  | <i>KCNAB3</i>   | TSS200  |
| cg01703329 | 17 | 3,859,977   | 5.92E-10 | 0.220 | 0.232 |  |  |  | <i>ATP2A3</i>   | Body    |
| cg21145938 | 8  | 38,795,218  | 0.00075  | 0.220 | 0.210 |  |  |  | <i>PLEKHA2</i>  | Body    |
| cg26830291 | 10 | 88,392,088  | 0.012467 | 0.220 | 0.212 |  |  |  |                 |         |
| cg08461339 | 2  | 241,459,227 | 3.97E-08 | 0.220 | 0.199 |  |  |  | <i>ANKMY1</i>   | Body    |
| cg00737840 | 11 | 125,036,420 | 0.011005 | 0.220 | 0.124 |  |  |  | <i>PKNOX2</i>   | 5'UTR   |
| cg07320017 | X  | 138,774,347 | 0.023887 | 0.220 | 0.235 |  |  |  | <i>MCF2</i>     | 5'UTR   |
| cg02624298 | 8  | 144,108,018 | 2.2E-06  | 0.220 | 0.202 |  |  |  |                 |         |
| cg04198091 | 5  | 139,283,351 | 0.001019 | 0.220 | 0.257 |  |  |  | <i>NRG2</i>     | Body    |
| cg04582294 | 10 | 88,022,744  | 0.003527 | 0.220 | 0.140 |  |  |  | <i>GRID1</i>    | Body    |
| cg04803994 | 11 | 1,592,587   | 0.00791  | 0.220 | 0.249 |  |  |  | <i>HCCA2</i>    | Body    |
| cg15336196 | 18 | 42,261,241  | 0.026566 | 0.220 | 0.137 |  |  |  | <i>SETBP1</i>   | 5'UTR   |
| cg05237470 | X  | 31,526,531  | 0.008816 | 0.220 | 0.224 |  |  |  | <i>DMD</i>      | Body    |
| cg18692678 | 12 | 114,838,772 | 0.008436 | 0.220 | 0.187 |  |  |  | <i>TBX5</i>     | Body    |
| cg00296038 | 3  | 11,624,533  | 6.41E-23 | 0.220 | 0.205 |  |  |  | <i>VGLL4</i>    | Body    |

|            |    |             |          |       |       |          |       |  |                 |         |
|------------|----|-------------|----------|-------|-------|----------|-------|--|-----------------|---------|
| cg06822690 | 1  | 82,040,009  | 1.73E-10 | 0.220 | 0.200 |          |       |  |                 |         |
| cg16198692 | 5  | 115,152,835 | 0.044769 | 0.220 | 0.027 |          |       |  | <i>CDO1</i>     | TSS1500 |
| cg27136740 | 2  | 172,965,837 | 3.84E-06 | 0.220 | 0.211 |          |       |  | <i>DLX2</i>     | Body    |
| cg27614534 | 18 | 56,296,496  | 4.25E-17 | 0.220 | 0.203 |          |       |  | <i>ALPK2</i>    | TSS1500 |
| cg27634724 | 20 | 43,729,861  | 5.23E-06 | 0.220 | 0.211 |          |       |  | <i>KCNS1</i>    | TSS200  |
| cg18071865 | 7  | 55,224,895  | 9.49E-09 | 0.220 | 0.203 |          |       |  | <i>EGFR</i>     | Body    |
| cg02421172 | 7  | 1,938,701   | 1.75E-09 | 0.220 | 0.222 |          |       |  | <i>MAD1L1</i>   | Body    |
| cg07920930 | 7  | 158,381,884 | 7.32E-11 | 0.220 | 0.193 |          |       |  | <i>PTPRN2</i>   | TSS1500 |
| cg20590797 | 17 | 48,253,122  | 8.28E-07 | 0.220 | 0.263 |          |       |  | <i>SGCA</i>     | 3'UTR   |
| cg22185100 | 20 | 20,344,529  | 0.006461 | 0.220 | 0.162 |          |       |  |                 |         |
| cg04829830 | 14 | 105,339,549 | 2.61E-14 | 0.220 | 0.204 |          |       |  | <i>KIAA0284</i> | 5'UTR   |
| cg05118960 | 3  | 50,359,978  | 2.54E-23 | 0.220 | 0.223 |          |       |  | <i>HYAL2</i>    | 5'UTR   |
| cg16824301 | 1  | 182,573,155 | 0.001484 | 0.220 | 0.249 |          |       |  | <i>RGS16</i>    | Body    |
| cg17158913 | 1  | 10,764,886  | 0.000758 | 0.220 | 0.118 |          |       |  | <i>CASZ1</i>    | 5'UTR   |
| cg06546202 | 8  | 143,387,265 | 7.46E-12 | 0.220 | 0.204 |          |       |  | <i>TSNARE1</i>  | Body    |
| cg12960126 | 4  | 187,686,256 | 5.93E-15 | 0.220 | 0.198 |          |       |  |                 |         |
| cg21550372 | 14 | 100,908,908 | 3.07E-05 | 0.220 | 0.222 |          |       |  | <i>WDR25</i>    | Body    |
| cg23118721 | 8  | 94,133,100  | 5.49E-08 | 0.220 | 0.215 |          |       |  |                 |         |
| cg16662451 | 17 | 18,647,507  | 5.54E-10 | 0.220 | 0.223 |          |       |  | <i>FBXW10</i>   | 5'UTR   |
| cg23340017 | 10 | 102,895,133 | 9.21E-07 | 0.220 | 0.204 |          |       |  | <i>TLX1</i>     | Body    |
| cg07493197 | 17 | 53,573,969  | 1.75E-07 | 0.220 | 0.237 |          |       |  |                 |         |
| cg25391117 | 5  | 34,043,284  | 4.95E-12 | 0.220 | 0.197 |          |       |  | <i>C1QTNF3</i>  | 1stExon |
| cg05597836 | 7  | 96,655,566  | 2.72E-08 | 0.220 | 0.197 |          |       |  | <i>DLX5</i>     | TSS1500 |
| cg23526298 | 12 | 5,620,971   | 0.017838 | 0.220 | 0.218 |          |       |  |                 |         |
| cg27422759 | 11 | 69,970,464  | 1.87E-07 | 0.220 | 0.209 |          |       |  | <i>ANO1</i>     | Body    |
| cg05085500 | 6  | 19,692,172  | 0.023177 | 0.220 | 0.219 |          |       |  |                 |         |
| cg14648774 | 20 | 61,900,546  | 7.32E-05 | 0.220 | 0.185 |          |       |  |                 |         |
| cg03454225 | 6  | 168,225,472 | 2.93E-12 | 0.220 | 0.202 |          |       |  | <i>C6orf124</i> | Body    |
| cg09088576 | 1  | 36,947,785  | 9.82E-10 | 0.220 | 0.212 |          |       |  | <i>CSF3R</i>    | 5'UTR   |
| cg16387532 | 5  | 124,747,822 | 0.046499 | 0.220 | 0.096 |          |       |  |                 |         |
| cg12571423 | 13 | 37,006,748  | 0.000623 | 0.220 | 0.200 | 9.15E-28 | 0.170 |  | <i>CCNA1</i>    | 5'UTR   |
| cg12755421 | 11 | 6,342,214   | 3.18E-05 | 0.220 | 0.202 |          |       |  | <i>PRKCDBP</i>  | TSS1500 |
| cg17548735 | 6  | 41,020,969  | 1.79E-10 | 0.220 | 0.201 |          |       |  | <i>APOBEC2</i>  | 5'UTR   |
| cg22389949 | 6  | 152,003,038 | 1.07E-08 | 0.220 | 0.218 |          |       |  |                 |         |

|            |    |             |          |       |       |  |  |     |                  |         |
|------------|----|-------------|----------|-------|-------|--|--|-----|------------------|---------|
| cg10608948 | 17 | 6,478,486   | 6.64E-08 | 0.220 | 0.202 |  |  |     |                  |         |
| cg03193847 | 4  | 169,637,496 | 2.93E-09 | 0.220 | 0.225 |  |  |     | <i>PALLD</i>     | Body    |
| cg21985690 | 5  | 79,330,669  | 1.24E-06 | 0.220 | 0.224 |  |  |     | <i>THBS4</i>     | TSS1500 |
| cg02356993 | 15 | 27,111,476  | 4.41E-08 | 0.220 | 0.199 |  |  |     | <i>GABRA5</i>    | TSS1500 |
| cg19389293 | 18 | 13,641,872  | 6.33E-05 | 0.220 | 0.187 |  |  |     | <i>C18orf1</i>   | Body    |
| cg26970042 | 11 | 111,815,419 | 1.03E-11 | 0.220 | 0.218 |  |  |     | <i>DIXDC1</i>    | Body    |
| cg04227238 | 6  | 29,894,005  | 5.41E-18 | 0.220 | 0.191 |  |  |     | <i>HCG4P6</i>    | TSS1500 |
| cg15204594 | 19 | 16,531,632  | 2.91E-11 | 0.220 | 0.223 |  |  |     | <i>EPS15L1</i>   | Body    |
| cg06997226 | 13 | 111,452,040 | 1.63E-06 | 0.220 | 0.207 |  |  |     |                  |         |
| cg14227460 | 19 | 4,518,743   | 0.037056 | 0.220 | 0.236 |  |  | Yes | <i>PLIN4</i>     | TSS1500 |
| cg06882591 | 19 | 34,397,628  | 5E-07    | 0.220 | 0.198 |  |  |     |                  |         |
| cg07556059 | 1  | 29,449,513  | 2.33E-08 | 0.220 | 0.226 |  |  |     | <i>TMEM200B</i>  | 5'UTR   |
| cg11375458 | 2  | 177,003,996 | 1.38E-07 | 0.220 | 0.185 |  |  |     |                  |         |
| cg20986832 | 1  | 226,150,312 | 0.000812 | 0.220 | 0.242 |  |  |     |                  |         |
| cg25300694 | 2  | 151,184,358 | 0.018152 | 0.220 | 0.152 |  |  |     |                  |         |
| cg03856949 | 12 | 51,318,042  | 0.002141 | 0.220 | 0.184 |  |  |     | <i>METTL7A</i>   | TSS1500 |
| cg05110828 | 3  | 61,570,099  | 8.73E-20 | 0.220 | 0.214 |  |  |     | <i>PTPRG</i>     | Body    |
| cg09371281 | 9  | 8,858,574   | 0.017693 | 0.220 | 0.164 |  |  |     | <i>PTPRD</i>     | 5'UTR   |
| cg14385362 | 9  | 127,054,095 | 4.63E-07 | 0.220 | 0.203 |  |  |     | <i>NEK6</i>      | TSS1500 |
| cg14414903 | 2  | 240,171,712 | 6.59E-08 | 0.220 | 0.219 |  |  |     | <i>HDAC4</i>     | Body    |
| cg20618826 | 10 | 81,148,896  | 1.56E-14 | 0.220 | 0.192 |  |  |     | <i>ZCCHC24</i>   | Body    |
| cg15775138 | 7  | 127,744,389 | 0.049122 | 0.220 | 0.199 |  |  |     |                  |         |
| cg16138458 | 6  | 27,841,120  | 0.011531 | 0.220 | 0.228 |  |  |     | <i>HIST1H4L</i>  | 1stExon |
| cg19693158 | 19 | 56,596,642  | 2.71E-07 | 0.220 | 0.196 |  |  |     |                  |         |
| cg03819089 | 2  | 66,298,217  | 6.74E-10 | 0.220 | 0.223 |  |  |     |                  |         |
| cg04144533 | 1  | 206,681,983 | 1.05E-08 | 0.220 | 0.212 |  |  |     | <i>RASSF5</i>    | Body    |
| cg06060522 | 20 | 44,782,039  | 0.007854 | 0.220 | 0.251 |  |  |     |                  |         |
| cg13075279 | 12 | 125,333,267 | 7.2E-17  | 0.220 | 0.194 |  |  |     | <i>SCARB1</i>    | Body    |
| cg03455107 | 17 | 54,509,207  | 1.01E-06 | 0.220 | 0.197 |  |  |     | <i>ANKFN1</i>    | Body    |
| cg21459340 | 20 | 2,781,324   | 0.047409 | 0.220 | 0.138 |  |  |     | <i>CPXM1</i>     | TSS200  |
| cg23497383 | 2  | 239,140,182 | 0.000432 | 0.220 | 0.209 |  |  |     | <i>LOC151174</i> | Body    |
| cg13971030 | 11 | 35,366,721  | 2.64E-13 | 0.220 | 0.223 |  |  |     | <i>SLC1A2</i>    | Body    |
| cg18254356 | 5  | 43,044,573  | 0.001005 | 0.220 | 0.245 |  |  |     | <i>LOC153684</i> | Body    |
| cg26288502 | 8  | 10,421,582  | 3.07E-07 | 0.220 | 0.255 |  |  |     |                  |         |



|            |    |             |          |       |       |          |       |  |                 |         |
|------------|----|-------------|----------|-------|-------|----------|-------|--|-----------------|---------|
| cg07095637 | 7  | 2,079,008   | 1.57E-19 | 0.220 | 0.180 |          |       |  | <i>MAD1L1</i>   | Body    |
| cg13107768 | 1  | 119,542,229 | 0.012645 | 0.220 | 0.197 |          |       |  |                 |         |
| cg25722029 | 19 | 13,907,696  | 1.95E-08 | 0.220 | 0.168 |          |       |  | <i>ZSWIM4</i>   | Body    |
| cg03252313 | 7  | 148,117,075 | 8.7E-13  | 0.220 | 0.207 |          |       |  | <i>CNTNAP2</i>  | 3'UTR   |
| cg12636499 | 10 | 105,408,599 | 1.11E-08 | 0.220 | 0.202 |          |       |  | <i>SH3PXD2A</i> | Body    |
| cg13957043 | 4  | 100,174,038 | 4.36E-10 | 0.220 | 0.225 |          |       |  |                 |         |
| cg11817961 | 1  | 39,025,469  | 0.023314 | 0.220 | 0.162 |          |       |  |                 |         |
| cg07733851 | 5  | 142,781,498 | 0.004536 | 0.220 | 0.131 |          |       |  | <i>NR3C1</i>    | 5'UTR   |
| cg07812715 | 12 | 117,483,086 | 4.15E-10 | 0.220 | 0.168 |          |       |  | <i>TESC</i>     | Body    |
| cg07281318 | 7  | 6,575,968   | 0.003885 | 0.220 | 0.255 |          |       |  | <i>GRID2IP</i>  | Body    |
| cg10634136 | 2  | 202,901,470 | 7.7E-06  | 0.220 | 0.218 |          |       |  | <i>FZD7</i>     | 1stExon |
| cg26127479 | 6  | 39,070,179  | 3.75E-08 | 0.220 | 0.213 |          |       |  |                 |         |
| cg26978698 | 4  | 145,567,592 | 0.003059 | 0.220 | 0.121 |          |       |  | <i>HHIP</i>     | 1stExon |
| cg05779675 | 16 | 50,637,092  | 5.55E-13 | 0.220 | 0.209 |          |       |  | <i>NKD1</i>     | Body    |
| cg12024292 | 9  | 120,177,979 | 0.000177 | 0.220 | 0.187 | 2.07E-20 | 0.165 |  | <i>ASTN2</i>    | TSS1500 |
| cg19611013 | 22 | 50,915,586  | 1.09E-10 | 0.220 | 0.208 |          |       |  |                 |         |
| cg20669292 | 17 | 40,823,420  | 7.75E-06 | 0.220 | 0.192 |          |       |  | <i>PLEKHH3</i>  | Body    |
| cg24392955 | 12 | 54,454,325  | 2.73E-12 | 0.220 | 0.192 |          |       |  | <i>FLJ12825</i> | Body    |
| cg02961101 | 16 | 48,533,155  | 1.7E-05  | 0.220 | 0.196 |          |       |  |                 |         |
| cg17017317 | 1  | 4,645,438   | 0.021779 | 0.220 | 0.292 |          |       |  |                 |         |
| cg10553204 | 2  | 20,871,195  | 1.61E-16 | 0.220 | 0.198 |          |       |  | <i>GDF7</i>     | 3'UTR   |
| cg20791593 | 2  | 242,751,796 | 1.73E-07 | 0.220 | 0.214 | 2.86E-11 | 0.090 |  | <i>NEU4</i>     | TSS1500 |
| cg11518509 | 1  | 114,525,428 | 1.7E-33  | 0.220 | 0.210 |          |       |  |                 |         |
| cg04370247 | 10 | 126,308,552 | 1.16E-10 | 0.220 | 0.197 |          |       |  | <i>FAM53B</i>   | 3'UTR   |
| cg08986840 | 8  | 38,409,865  | 2.32E-08 | 0.220 | 0.208 |          |       |  |                 |         |
| cg21225548 | 9  | 100,864,335 | 0.000735 | 0.220 | 0.150 |          |       |  | <i>TRIM14</i>   | Body    |
| cg15890075 | 17 | 18,011,923  | 3E-17    | 0.220 | 0.198 |          |       |  | <i>MYO15A</i>   | TSS200  |
| cg18208602 | 18 | 10,488,229  | 0.002373 | 0.220 | 0.213 |          |       |  | <i>APCDD1</i>   | 3'UTR   |
| cg17438155 | 7  | 73,038,045  | 0.004171 | 0.220 | 0.227 |          |       |  | <i>MLXIPL</i>   | Body    |
| cg10552446 | 2  | 66,809,923  | 0.000929 | 0.220 | 0.228 |          |       |  |                 |         |
| cg15673955 | 2  | 173,787,028 | 2.45E-06 | 0.220 | 0.195 |          |       |  | <i>RAPGEF4</i>  | Body    |
| cg24112713 | 14 | 21,494,093  | 2.67E-05 | 0.220 | 0.212 |          |       |  | <i>NDRG2</i>    | TSS1500 |
| cg06132502 | 15 | 71,145,127  | 1.88E-09 | 0.220 | 0.200 |          |       |  | <i>LARP6</i>    | Body    |
| cg12754421 | 11 | 105,480,790 | 0.003594 | 0.220 | 0.227 |          |       |  | <i>GRIA4</i>    | TSS200  |

|            |    |             |          |       |       |          |       |  |                 |         |
|------------|----|-------------|----------|-------|-------|----------|-------|--|-----------------|---------|
| cg00301795 | 1  | 200,195,818 | 0.020834 | 0.220 | 0.266 |          |       |  |                 |         |
| cg10695490 | 19 | 49,659,299  | 8.26E-13 | 0.220 | 0.202 |          |       |  | <i>HRC</i>      | TSS1500 |
| cg12165215 | 17 | 35,277,398  | 0.001249 | 0.220 | 0.164 |          |       |  |                 |         |
| cg23559689 | 11 | 105,481,292 | 0.02223  | 0.220 | 0.258 |          |       |  | <i>GRIA4</i>    | 5'UTR   |
| cg05774978 | 1  | 146,649,842 | 0.010506 | 0.220 | 0.209 |          |       |  | <i>PDIA3P</i>   | Body    |
| cg19871388 | 20 | 50,419,082  | 1.08E-06 | 0.220 | 0.186 |          |       |  | <i>SALL4</i>    | TSS200  |
| cg12947833 | 11 | 111,783,499 | 6.44E-05 | 0.220 | 0.246 |          |       |  | <i>HSPB2</i>    | 5'UTR   |
| cg24422029 | 10 | 18,549,378  | 2.29E-12 | 0.220 | 0.202 |          |       |  | <i>CACNB2</i>   | Body    |
| cg07245678 | 2  | 85,641,254  | 0.039889 | 0.220 | 0.324 |          |       |  |                 |         |
| cg14774117 | 6  | 44,310,005  | 5.46E-10 | 0.220 | 0.208 |          |       |  | <i>SPATS1</i>   | TSS1500 |
| cg24698655 | 6  | 28,557,774  | 0.000581 | 0.220 | 0.188 |          |       |  |                 |         |
| cg13997645 | 11 | 15,136,475  | 0.024128 | 0.220 | 0.253 |          |       |  | <i>INSC</i>     | TSS200  |
| cg09086087 | 16 | 68,000,763  | 8.83E-11 | 0.220 | 0.196 |          |       |  | <i>SLC12A4</i>  | 1stExon |
| cg27405400 | 2  | 127,839,539 | 7.92E-06 | 0.220 | 0.214 |          |       |  | <i>BIN1</i>     | Body    |
| cg01670677 | 11 | 71,955,322  | 0.027463 | 0.220 | 0.288 |          |       |  | <i>PHOX2A</i>   | TSS200  |
| cg03665785 | 22 | 29,458,676  | 1.39E-07 | 0.220 | 0.223 | 6.39E-13 | 0.216 |  | <i>C22orf31</i> | TSS1500 |
| cg09287650 | 10 | 29,981,216  | 1.08E-19 | 0.220 | 0.224 |          |       |  | <i>SVIL</i>     | 5'UTR   |
| cg02361878 | 1  | 165,326,327 | 2.91E-10 | 0.220 | 0.193 |          |       |  | <i>LMX1A</i>    | TSS1500 |
| cg08029978 | 6  | 28,784,801  | 0.04174  | 0.220 | 0.325 |          |       |  |                 |         |
| cg21293464 | 11 | 66,885,276  | 0.000104 | 0.220 | 0.202 |          |       |  | <i>KDM2A</i>    | TSS1500 |
| cg26312807 | 3  | 127,057,048 | 3.16E-06 | 0.220 | 0.192 |          |       |  |                 |         |
| cg04789403 | 15 | 80,271,218  | 2.15E-07 | 0.220 | 0.236 |          |       |  |                 |         |
| cg06204755 | 17 | 70,484,432  | 1.02E-05 | 0.220 | 0.152 |          |       |  |                 |         |
| cg10585661 | 3  | 184,056,618 | 2.09E-09 | 0.220 | 0.186 |          |       |  | <i>FAM131A</i>  | 5'UTR   |
| cg16353318 | 16 | 81,564,161  | 3.17E-05 | 0.220 | 0.202 |          |       |  | <i>CMIP</i>     | Body    |
| cg24849648 | 7  | 120,964,019 | 1.03E-06 | 0.220 | 0.167 | 1.08E-07 | 0.128 |  | <i>WNT16</i>    | TSS1500 |
| cg02876293 | 7  | 157,456,001 | 6.94E-12 | 0.220 | 0.180 |          |       |  | <i>PTPRN2</i>   | Body    |
| cg07409292 | 4  | 90,228,685  | 2.25E-05 | 0.220 | 0.147 |          |       |  | <i>GPRIN3</i>   | 5'UTR   |
| cg15869071 | 4  | 2,798,158   | 0.019866 | 0.220 | 0.085 |          |       |  | <i>SH3BP2</i>   | 5'UTR   |
| cg26341831 | 1  | 226,036,279 | 0.000463 | 0.220 | 0.161 |          |       |  | <i>TMEM63A</i>  | Body    |
| cg01580681 | 4  | 174,450,016 | 0.002965 | 0.220 | 0.231 | 1.49E-08 | 0.133 |  | <i>HAND2</i>    | 1stExon |
| cg06478457 | 7  | 29,604,764  | 0.015825 | 0.220 | 0.169 |          |       |  | <i>PRR15</i>    | 5'UTR   |
| cg07064711 | 8  | 117,950,335 | 0.026126 | 0.220 | 0.138 |          |       |  | <i>C8orf85</i>  | TSS200  |
| cg14813083 | 11 | 18,477,280  | 0.000342 | 0.220 | 0.175 | 1.24E-08 | 0.128 |  | <i>LDHAL6A</i>  | TSS200  |

|            |    |             |          |       |       |          |       |  |                  |         |
|------------|----|-------------|----------|-------|-------|----------|-------|--|------------------|---------|
| cg01299332 | 5  | 79,406,275  | 5.86E-08 | 0.220 | 0.229 |          |       |  |                  |         |
| cg18182148 | 1  | 92,952,533  | 6.63E-06 | 0.220 | 0.190 |          |       |  | <i>GFI1</i>      | TSS1500 |
| cg00905746 | 2  | 857,746     | 0.001908 | 0.220 | 0.212 |          |       |  |                  |         |
| cg04368971 | 14 | 94,917,779  | 0.000442 | 0.220 | 0.213 |          |       |  | <i>SERPINA11</i> | 5'UTR   |
| cg09543819 | 6  | 49,881,441  | 0.043144 | 0.220 | 0.187 |          |       |  |                  |         |
| cg17510278 | 20 | 21,696,115  | 0.006037 | 0.220 | 0.260 |          |       |  | <i>PAX1</i>      | 3'UTR   |
| cg10862535 | 19 | 46,526,483  | 2.25E-07 | 0.220 | 0.190 | 1.64E-08 | 0.086 |  | <i>PGLYRP1</i>   | TSS200  |
| cg17806162 | 1  | 2,472,133   | 1.34E-05 | 0.220 | 0.213 |          |       |  |                  |         |
| cg20689476 | 4  | 6,385,854   | 0.007678 | 0.220 | 0.209 |          |       |  | <i>PPP2R2C</i>   | Body    |
| cg03593823 | 1  | 240,690,404 | 1.99E-06 | 0.220 | 0.212 |          |       |  | <i>GREM2</i>     | 5'UTR   |
| cg14155193 | 9  | 129,148,742 | 1.21E-10 | 0.220 | 0.214 |          |       |  | <i>FAM125B</i>   | Body    |
| cg03043665 | 1  | 3,615,762   | 3.09E-06 | 0.220 | 0.213 |          |       |  | <i>TP73</i>      | Body    |
| cg03186851 | 17 | 44,896,748  | 0.004059 | 0.220 | 0.272 |          |       |  | <i>WNT3</i>      | TSS1500 |
| cg07982740 | 20 | 44,410,114  | 2.08E-11 | 0.220 | 0.215 |          |       |  | <i>WFDC3</i>     | Body    |
| cg10544251 | 1  | 156,215,727 | 0.02821  | 0.220 | 0.154 |          |       |  | <i>PAQR6</i>     | 5'UTR   |
| cg26220594 | 1  | 19,110,978  | 0.022196 | 0.220 | 0.218 |          |       |  |                  |         |
| cg08594888 | 12 | 53,183,773  | 0.001717 | 0.220 | 0.205 |          |       |  | <i>KRT3</i>      | 3'UTR   |
| cg26588612 | 6  | 148,562,337 | 1.17E-17 | 0.220 | 0.226 |          |       |  |                  |         |
| cg03274456 | 11 | 62,273,116  | 2.33E-10 | 0.220 | 0.213 |          |       |  | <i>AHNAK</i>     | Body    |
| cg03532263 | 14 | 103,012,356 | 0.001691 | 0.220 | 0.182 |          |       |  |                  |         |
| cg03700024 | 2  | 74,666,700  | 1.99E-06 | 0.220 | 0.221 |          |       |  | <i>RTKN</i>      | Body    |
| cg16563187 | 16 | 85,730,606  | 5.77E-09 | 0.220 | 0.223 |          |       |  |                  |         |
| cg26576398 | 10 | 18,550,135  | 3.69E-09 | 0.220 | 0.197 |          |       |  | <i>CACNB2</i>    | 1stExon |
| cg01947583 | 4  | 8,310,999   | 9.03E-10 | 0.219 | 0.209 |          |       |  |                  |         |
| cg22191981 | 6  | 41,472,382  | 0.002393 | 0.219 | 0.176 |          |       |  |                  |         |
| cg26698460 | 19 | 58,716,004  | 1.38E-13 | 0.219 | 0.230 |          |       |  | <i>ZNF274</i>    | Body    |
| cg13904874 | 9  | 89,411,000  | 1.89E-09 | 0.219 | 0.202 |          |       |  |                  |         |
| cg24931346 | 1  | 22,979,546  | 5.47E-15 | 0.219 | 0.212 |          |       |  | <i>C1QB</i>      | TSS200  |
| cg10918171 | 6  | 170,601,120 | 0.042172 | 0.219 | 0.157 |          |       |  | <i>DLL1</i>      | TSS1500 |
| cg13933734 | 1  | 119,550,484 | 0.000929 | 0.219 | 0.199 |          |       |  |                  |         |
| cg08966889 | 6  | 52,440,429  | 4.79E-10 | 0.219 | 0.205 |          |       |  | <i>TRAM2</i>     | Body    |
| cg09547119 | 19 | 52,391,367  | 0.034482 | 0.219 | 0.208 |          |       |  | <i>ZNF577</i>    | TSS200  |
| cg09833911 | 16 | 88,701,212  | 2.95E-07 | 0.219 | 0.195 |          |       |  |                  |         |
| cg24063856 | 17 | 43,863,303  | 0.000199 | 0.219 | 0.128 |          |       |  | <i>CRHR1</i>     | Body    |

|            |    |             |          |       |       |          |       |  |                  |         |
|------------|----|-------------|----------|-------|-------|----------|-------|--|------------------|---------|
| cg24680629 | 5  | 177,535,066 | 5.4E-09  | 0.219 | 0.229 |          |       |  |                  |         |
| cg26275647 | 7  | 114,648,973 | 6.4E-05  | 0.219 | 0.181 |          |       |  | <i>MDFIC</i>     | Body    |
| cg09706122 | 12 | 54,071,165  | 0.015127 | 0.219 | 0.184 |          |       |  | <i>ATP5G2</i>    | TSS1500 |
| cg09887059 | 12 | 113,916,664 | 0.003382 | 0.219 | 0.221 |          |       |  |                  |         |
| cg08958168 | 16 | 68,001,415  | 3.2E-11  | 0.219 | 0.190 |          |       |  | <i>SLC12A4</i>   | Body    |
| cg11241663 | 2  | 66,810,341  | 0.014457 | 0.219 | 0.243 |          |       |  |                  |         |
| cg14349977 | 4  | 187,219,430 | 0.029165 | 0.219 | 0.306 |          |       |  |                  |         |
| cg14785392 | 5  | 61,180,442  | 1.18E-06 | 0.219 | 0.167 |          |       |  |                  |         |
| cg18956714 | 13 | 97,646,803  | 0.011495 | 0.219 | 0.282 |          |       |  | <i>OXGR1</i>     | TSS200  |
| cg01404873 | 13 | 50,701,050  | 3.23E-12 | 0.219 | 0.195 |          |       |  | <i>DLEU2</i>     | TSS1500 |
| cg07848409 | 3  | 172,166,987 | 0.016458 | 0.219 | 0.296 |          |       |  | <i>GHSR</i>      | TSS1500 |
| cg09719269 | 12 | 125,033,803 | 0.004326 | 0.219 | 0.186 |          |       |  |                  |         |
| cg12103152 | 6  | 78,173,200  | 0.016409 | 0.219 | 0.201 |          |       |  | <i>HTR1B</i>     | TSS200  |
| cg13785196 | 1  | 32,646,858  | 0.000142 | 0.219 | 0.192 |          |       |  | <i>TXLNA</i>     | Body    |
| cg16867777 | 21 | 32,932,073  | 0.0012   | 0.219 | 0.145 |          |       |  | <i>TIAM1</i>     | TSS1500 |
| cg22851200 | 7  | 100,465,833 | 4.7E-14  | 0.219 | 0.210 |          |       |  | <i>TRIP6</i>     | Body    |
| cg27398401 | 1  | 56,976,548  | 3.55E-06 | 0.219 | 0.206 |          |       |  | <i>PPAP2B</i>    | Body    |
| cg11129008 | 3  | 181,428,647 | 7.57E-06 | 0.219 | 0.205 |          |       |  | <i>SOX2OT</i>    | Body    |
| cg11847636 | 19 | 50,015,523  | 7.21E-18 | 0.219 | 0.219 |          |       |  | <i>FCGRT</i>     | TSS200  |
| cg18674643 | 4  | 154,713,748 | 0.026284 | 0.219 | 0.262 |          |       |  |                  |         |
| cg19951244 | 5  | 172,672,766 | 0.000254 | 0.219 | 0.258 |          |       |  |                  |         |
| cg11678896 | 4  | 568,514     | 0.03275  | 0.219 | 0.233 |          |       |  |                  |         |
| cg24496666 | 1  | 78,511,979  | 0.000104 | 0.219 | 0.205 | 1.62E-13 | 0.184 |  | <i>GIPC2</i>     | 1stExon |
| cg23098599 | 19 | 15,235,953  | 0.004018 | 0.219 | 0.165 |          |       |  | <i>ILVBL</i>     | 5'UTR   |
| cg21324456 | 20 | 50,248,076  | 2.39E-06 | 0.219 | 0.249 |          |       |  | <i>ATP9A</i>     | Body    |
| cg09119967 | 20 | 9,494,838   | 1.36E-05 | 0.219 | 0.193 | 1.55E-07 | 0.087 |  | <i>C20orf103</i> | TSS1500 |
| cg20803293 | 1  | 110,254,709 | 2.12E-07 | 0.219 | 0.189 |          |       |  | <i>GSTM5</i>     | TSS200  |
| cg08879365 | 12 | 106,066,082 | 0.002079 | 0.219 | 0.125 |          |       |  |                  |         |
| cg02195680 | 16 | 28,519,566  | 5.4E-08  | 0.219 | 0.225 |          |       |  | <i>IL27</i>      | TSS1500 |
| cg16200879 | 19 | 4,326,975   | 5.7E-06  | 0.219 | 0.232 |          |       |  | <i>STAP2</i>     | Body    |
| cg10609310 | 8  | 38,722,935  | 0.000304 | 0.219 | 0.192 |          |       |  |                  |         |
| cg03121281 | 7  | 96,627,253  | 0.024925 | 0.219 | 0.231 |          |       |  | <i>DLX6AS</i>    | Body    |
| cg05142617 | 2  | 95,690,821  | 2.63E-05 | 0.219 | 0.218 |          |       |  | <i>MAL</i>       | TSS1500 |
| cg24878115 | 19 | 18,545,062  | 0.005723 | 0.219 | 0.084 |          |       |  | <i>SSBP4</i>     | 3'UTR   |

|            |    |             |          |       |       |          |       |  |                  |         |
|------------|----|-------------|----------|-------|-------|----------|-------|--|------------------|---------|
| cg01613010 | 7  | 20,835,627  | 7.54E-09 | 0.219 | 0.214 |          |       |  |                  |         |
| cg04811512 | 20 | 21,686,080  | 0.001162 | 0.219 | 0.189 |          |       |  | <i>PAX1</i>      | TSS1500 |
| cg13878010 | 3  | 123,167,276 | 0.011289 | 0.219 | 0.253 | 3.93E-08 | 0.137 |  | <i>ADCY5</i>     | 1stExon |
| cg05736768 | 8  | 105,479,248 | 0.025555 | 0.219 | 0.211 |          |       |  | <i>DPYS</i>      | 1stExon |
| cg00971695 | 14 | 65,169,664  | 1.35E-08 | 0.219 | 0.182 |          |       |  |                  |         |
| cg03740216 | 19 | 10,397,561  | 0.000613 | 0.219 | 0.229 | 6.57E-18 | 0.148 |  | <i>ICAM4</i>     | TSS200  |
| cg04505845 | 6  | 170,553,549 | 1.58E-05 | 0.219 | 0.190 |          |       |  |                  |         |
| cg14499058 | 8  | 141,129,321 | 0.000103 | 0.219 | 0.233 |          |       |  | <i>TRAPPC9</i>   | Body    |
| cg06870213 | 6  | 55,444,335  | 2.98E-06 | 0.219 | 0.162 |          |       |  | <i>HMGCLL1</i>   | TSS1500 |
| cg13307880 | 5  | 140,744,367 | 0.02289  | 0.219 | 0.225 |          |       |  | <i>PCDHGA4</i>   | Body    |
| cg14021133 | 7  | 20,834,283  | 1.27E-06 | 0.219 | 0.208 |          |       |  |                  |         |
| cg21269897 | 6  | 27,107,002  | 2.72E-05 | 0.219 | 0.210 | 5.33E-09 | 0.119 |  | <i>HIST1H2BK</i> | 3'UTR   |
| cg00805880 | 1  | 203,045,044 | 0.011514 | 0.219 | 0.136 |          |       |  | <i>PPFIA4</i>    | Body    |
| cg01106926 | 4  | 13,539,255  | 0.011693 | 0.219 | 0.298 |          |       |  |                  |         |
| cg18361098 | 14 | 37,136,391  | 0.007556 | 0.219 | 0.154 |          |       |  | <i>PAX9</i>      | Body    |
| cg03609488 | 12 | 12,044,761  | 2E-13    | 0.219 | 0.201 |          |       |  | <i>ETV6</i>      | 3'UTR   |
| cg12062282 | 19 | 49,524,228  | 0.011285 | 0.219 | 0.261 |          |       |  |                  |         |
| cg12731773 | 11 | 846,055     | 9.38E-27 | 0.219 | 0.218 |          |       |  | <i>TSPAN4</i>    | 5'UTR   |
| cg19518104 | 8  | 70,981,345  | 4.01E-06 | 0.219 | 0.206 |          |       |  | <i>PRDM14</i>    | Body    |
| cg26630171 | 19 | 3,459,270   | 2.84E-13 | 0.219 | 0.227 |          |       |  | <i>NFIC</i>      | Body    |
| cg03319497 | 5  | 145,722,730 | 0.000891 | 0.219 | 0.216 |          |       |  |                  |         |
| cg19244428 | 6  | 3,229,233   | 0.041584 | 0.219 | 0.282 |          |       |  | <i>TUBB2B</i>    | TSS1500 |
| cg20564283 | 8  | 49,469,560  | 0.005978 | 0.219 | 0.218 |          |       |  |                  |         |
| cg04751149 | 2  | 66,673,449  | 2.41E-05 | 0.219 | 0.215 |          |       |  | <i>MEIS1</i>     | Body    |
| cg08009275 | 17 | 79,790,191  | 6.32E-30 | 0.219 | 0.206 |          |       |  | <i>FAM195B</i>   | 5'UTR   |
| cg20194973 | 22 | 50,524,676  | 2.44E-05 | 0.219 | 0.189 |          |       |  | <i>MLC1</i>      | TSS1500 |
| cg01513063 | 17 | 75,470,567  | 2.22E-05 | 0.219 | 0.174 |          |       |  | <i>SEPT9</i>     | Body    |
| cg02382400 | 20 | 3,218,487   | 1.47E-20 | 0.219 | 0.207 |          |       |  | <i>SLC4A11</i>   | TSS200  |
| cg05141333 | 8  | 145,048,363 | 3.08E-21 | 0.219 | 0.211 |          |       |  | <i>PLEC1</i>     | Body    |
| cg23338993 | 2  | 234,600,423 | 4.94E-09 | 0.219 | 0.190 |          |       |  | <i>UGT1A10</i>   | Body    |
| cg03101021 | 7  | 126,891,319 | 0.008794 | 0.219 | 0.296 |          |       |  | <i>GRM8</i>      | 5'UTR   |
| cg04671932 | 7  | 79,082,898  | 0.005417 | 0.219 | 0.186 |          |       |  | <i>MAGI2</i>     | TSS200  |
| cg05719612 | 10 | 18,629,545  | 0.005101 | 0.219 | 0.162 |          |       |  | <i>CACNB2</i>    | Body    |
| cg12348202 | 7  | 158,381,023 | 6.46E-32 | 0.219 | 0.209 |          |       |  | <i>PTPRN2</i>    | TSS1500 |

|            |    |             |          |       |       |           |       |  |           |         |
|------------|----|-------------|----------|-------|-------|-----------|-------|--|-----------|---------|
| cg12998503 | 4  | 184,177,628 | 1.24E-06 | 0.219 | 0.237 |           |       |  | WWC2      | Body    |
| cg14503636 | 13 | 113,611,556 | 1.79E-17 | 0.219 | 0.215 |           |       |  |           |         |
| cg08764162 | 10 | 31,147,088  | 4.5E-12  | 0.219 | 0.227 |           |       |  | ZNF438    | Body    |
| cg22044002 | 10 | 94,825,547  | 0.003611 | 0.219 | 0.092 |           |       |  | CYP26C1   | Body    |
| cg07793033 | 16 | 85,256,423  | 5.23E-13 | 0.219 | 0.210 |           |       |  |           |         |
| cg11070059 | 7  | 96,626,399  | 0.035546 | 0.219 | 0.230 |           |       |  | DLX6AS    | Body    |
| cg11382529 | 8  | 65,490,613  | 0.041189 | 0.219 | 0.165 |           |       |  | LOC401463 | TSS1500 |
| cg14021168 | 17 | 8,242,177   | 5.94E-18 | 0.219 | 0.199 |           |       |  | ODF4      | TSS1500 |
| cg23000806 | 8  | 48,854,968  | 0.014792 | 0.219 | 0.098 |           |       |  | PRKDC     | Body    |
| cg20374595 | 13 | 100,627,956 | 0.000441 | 0.219 | 0.204 |           |       |  |           |         |
| cg12399687 | 15 | 66,949,579  | 2.1E-11  | 0.219 | 0.233 |           |       |  |           |         |
| cg15106134 | 3  | 181,428,466 | 3.27E-06 | 0.219 | 0.215 |           |       |  | SOX2OT    | Body    |
| cg25560247 | 6  | 31,832,173  | 7.39E-09 | 0.219 | 0.188 |           |       |  | NEU1      | TSS1500 |
| cg11479156 | 11 | 70,672,388  | 1.8E-14  | 0.219 | 0.193 |           |       |  | SHANK2    | Body    |
| cg00271210 | 6  | 167,070,053 | 1.37E-07 | 0.219 | 0.160 |           |       |  | RPS6KA2   | Body    |
| cg18697632 | 5  | 77,140,985  | 0.006703 | 0.219 | 0.234 |           |       |  |           |         |
| cg24324985 | 20 | 22,566,884  | 2E-05    | 0.219 | 0.211 |           |       |  | FOXA2     | TSS1500 |
| cg03787603 | 7  | 101,768,610 | 4.83E-09 | 0.219 | 0.221 |           |       |  | CUX1      | Body    |
| cg15989981 | 13 | 20,736,009  | 1.31E-05 | 0.219 | 0.197 |           |       |  | GJA3      | TSS1500 |
| cg22970173 | 22 | 41,637,080  | 6.97E-08 | 0.219 | 0.198 |           |       |  | CHADL     | TSS200  |
| cg10919664 | 6  | 28,945,322  | 3.31E-05 | 0.219 | 0.208 |           |       |  |           |         |
| cg12408601 | 6  | 27,841,665  | 0.044671 | 0.219 | 0.249 |           |       |  | HIST1H4L  | TSS1500 |
| cg26461855 | 6  | 30,695,686  | 1.57E-13 | 0.219 | 0.210 |           |       |  | FLOT1     | 3'UTR   |
| cg07610192 | 2  | 131,130,423 | 0.038749 | 0.219 | 0.185 |           |       |  | PTPN18    | Body    |
| cg05395187 | 12 | 124,913,717 | 6.05E-20 | 0.219 | 0.213 |           |       |  | NCOR2     | Body    |
| cg15076318 | 6  | 32,847,788  | 8.15E-06 | 0.219 | 0.253 |           |       |  | PPP1R2P1  | Body    |
| cg26710891 | 17 | 2,324,923   | 1.45E-06 | 0.219 | 0.242 |           |       |  | METT10D   | Body    |
| cg04872675 | 12 | 108,983,234 | 0.006315 | 0.219 | 0.237 |           |       |  |           |         |
| cg10529613 | 14 | 25,287,305  | 0.006779 | 0.219 | 0.234 |           |       |  | STXBP6    | Body    |
| cg07665260 | 20 | 42,544,086  | 0.026952 | 0.219 | 0.144 |           |       |  | TOX2      | TSS1500 |
| cg16750777 | 16 | 50,583,441  | 1.43E-11 | 0.219 | 0.212 |           |       |  | NKD1      | Body    |
| cg20927731 | 15 | 74,726,561  | 0.001551 | 0.219 | 0.133 |           |       |  | SEMA7A    | TSS1500 |
| cg11071231 | 8  | 57,069,907  | 0.013398 | 0.219 | 0.120 |           |       |  |           |         |
| cg03425110 | 10 | 71,333,037  | 0.02002  | 0.219 | 0.248 | 0.0000412 | 0.089 |  | NEUROG3   | 5'UTR   |

|            |    |             |          |       |       |            |       |  |                 |         |
|------------|----|-------------|----------|-------|-------|------------|-------|--|-----------------|---------|
| cg13866253 | 11 | 77,093,001  | 1.7E-15  | 0.219 | 0.220 |            |       |  | <i>PAK1</i>     | Body    |
| cg15556591 | 4  | 1,027,967   | 1.65E-07 | 0.219 | 0.203 |            |       |  |                 |         |
| cg23247185 | 3  | 14,530,356  | 6.29E-06 | 0.219 | 0.250 |            |       |  | <i>SLC6A6</i>   | 3'UTR   |
| cg13508175 | 10 | 88,296,364  | 0.000843 | 0.219 | 0.192 |            |       |  |                 |         |
| cg27016494 | 7  | 96,651,586  | 8.67E-10 | 0.219 | 0.208 | 0.00106596 | 0.064 |  | <i>DLX5</i>     | Body    |
| cg12930100 | 3  | 181,428,697 | 1.23E-06 | 0.219 | 0.202 |            |       |  | <i>SOX20T</i>   | Body    |
| cg21771463 | 3  | 44,626,400  | 0.007285 | 0.219 | 0.093 |            |       |  | <i>ZNF660</i>   | TSS200  |
| cg01344171 | 6  | 43,612,647  | 1.17E-07 | 0.219 | 0.194 | 1.47E-15   | 0.173 |  | <i>RSPH9</i>    | TSS200  |
| cg14188840 | 7  | 27,220,398  | 1.24E-10 | 0.219 | 0.202 |            |       |  | <i>HOXA10</i>   | TSS1500 |
| cg17065262 | 17 | 27,506,097  | 0.033603 | 0.219 | 0.124 |            |       |  | <i>MYO18A</i>   | 5'UTR   |
| cg00407944 | 9  | 139,424,152 | 1.03E-12 | 0.219 | 0.196 |            |       |  | <i>NOTCH1</i>   | Body    |
| cg08202144 | 8  | 1,004,177   | 0.001666 | 0.219 | 0.209 |            |       |  |                 |         |
| cg27577993 | 7  | 151,454,795 | 6.87E-10 | 0.219 | 0.224 |            |       |  | <i>PRKAG2</i>   | Body    |
| cg07047653 | 12 | 50,344,626  | 3.15E-22 | 0.219 | 0.204 | 0.00019757 | 0.044 |  | <i>AQP2</i>     | 1stExon |
| cg10027723 | 1  | 51,888,574  | 4.63E-11 | 0.219 | 0.203 |            |       |  | <i>EPS15</i>    | TSS1500 |
| cg12041056 | 22 | 27,053,247  | 0.04812  | 0.219 | 0.188 |            |       |  | <i>MIAT</i>     | TSS1500 |
| cg08134091 | 6  | 11,213,750  | 4.07E-14 | 0.219 | 0.223 |            |       |  | <i>NEDD9</i>    | Body    |
| cg16706389 | 10 | 1,568,812   | 0.000745 | 0.219 | 0.165 |            |       |  | <i>ADARB2</i>   | Body    |
| cg18255353 | 4  | 154,712,422 | 0.040354 | 0.219 | 0.209 |            |       |  |                 |         |
| cg24824371 | 7  | 158,075,968 | 5.73E-14 | 0.219 | 0.227 |            |       |  | <i>PTPRN2</i>   | Body    |
| cg07608565 | 19 | 55,595,022  | 2.71E-11 | 0.219 | 0.205 |            |       |  | <i>EPS8L1</i>   | Body    |
| cg24088496 | 11 | 96,071,506  | 1.51E-07 | 0.219 | 0.214 |            |       |  | <i>MAML2</i>    | Body    |
| cg25824509 | 3  | 42,701,690  | 1.63E-05 | 0.219 | 0.256 |            |       |  | <i>ZBTB47</i>   | Body    |
| cg26827533 | 8  | 22,458,122  | 3.32E-10 | 0.219 | 0.222 |            |       |  | <i>C8orf58</i>  | Body    |
| cg01948850 | 3  | 11,651,536  | 1.84E-18 | 0.219 | 0.194 |            |       |  | <i>VGLL4</i>    | Body    |
| cg06325209 | 1  | 162,602,217 | 1.52E-08 | 0.219 | 0.213 |            |       |  | <i>DDR2</i>     | TSS200  |
| cg12929809 | 12 | 98,150,305  | 3.87E-06 | 0.219 | 0.227 |            |       |  |                 |         |
| cg13560452 | 6  | 137,813,584 | 5.58E-06 | 0.219 | 0.213 |            |       |  | <i>OLIG3</i>    | 1stExon |
| cg15223899 | 22 | 24,891,158  | 0.003054 | 0.219 | 0.246 |            |       |  | <i>C22orf45</i> | TSS1500 |
| cg16301004 | 10 | 106,082,537 | 0.003215 | 0.219 | 0.215 |            |       |  | <i>ITPRIP</i>   | 5'UTR   |
| cg21829328 | 22 | 24,188,134  | 4.74E-05 | 0.219 | 0.267 |            |       |  |                 |         |
| cg06015218 | 6  | 146,350,434 | 0.004175 | 0.219 | 0.186 | 4.56E-20   | 0.140 |  | <i>GRM1</i>     | 5'UTR   |
| cg07838048 | 16 | 70,720,440  | 1.31E-11 | 0.219 | 0.196 |            |       |  | <i>MTSS1L</i>   | TSS1500 |
| cg07272264 | 12 | 101,111,683 | 0.011881 | 0.219 | 0.256 |            |       |  |                 |         |

|            |    |             |          |       |       |  |  |     |                 |         |
|------------|----|-------------|----------|-------|-------|--|--|-----|-----------------|---------|
| cg23379208 | 6  | 30,522,674  | 6.16E-13 | 0.219 | 0.203 |  |  |     | <i>GNL1</i>     | Body    |
| cg17825384 | 1  | 31,380,853  | 0.00972  | 0.219 | 0.204 |  |  |     | <i>SDC3</i>     | Body    |
| cg21085701 | 19 | 12,033,228  | 2.97E-10 | 0.219 | 0.207 |  |  |     |                 |         |
| cg00736406 | 16 | 23,504,930  | 1.18E-08 | 0.219 | 0.222 |  |  |     | <i>GGA2</i>     | Body    |
| cg20670946 | 12 | 122,502,170 | 6.22E-10 | 0.219 | 0.206 |  |  |     |                 |         |
| cg23547157 | 12 | 133,199,323 | 2.99E-10 | 0.219 | 0.215 |  |  |     |                 |         |
| cg14391586 | 20 | 62,681,296  | 0.024218 | 0.219 | 0.270 |  |  |     | <i>SOX18</i>    | TSS1500 |
| cg00148862 | 2  | 1,286,394   | 0.000134 | 0.219 | 0.141 |  |  |     | <i>SNTG2</i>    | Body    |
| cg02509058 | 5  | 2,753,746   | 0.00997  | 0.219 | 0.271 |  |  |     | <i>C5orf38</i>  | Body    |
| cg08454507 | 17 | 78,755,406  | 9.41E-13 | 0.219 | 0.215 |  |  |     | <i>RPTOR</i>    | Body    |
| cg13901675 | 9  | 109,460,023 | 6.06E-20 | 0.219 | 0.199 |  |  |     |                 |         |
| cg19084629 | 12 | 117,407,879 | 2.41E-32 | 0.219 | 0.218 |  |  |     | <i>FBXW8</i>    | Body    |
| cg02391509 | 3  | 27,766,382  | 0.002892 | 0.219 | 0.265 |  |  |     |                 |         |
| cg07333191 | 4  | 13,526,769  | 0.017696 | 0.219 | 0.235 |  |  |     |                 |         |
| cg25461801 | 13 | 100,630,316 | 0.000473 | 0.219 | 0.209 |  |  |     |                 |         |
| cg10670430 | 3  | 196,755,688 | 4.74E-10 | 0.219 | 0.200 |  |  |     | <i>MF12</i>     | Body    |
| cg03834567 | 2  | 218,808,745 | 8.17E-19 | 0.219 | 0.213 |  |  |     | <i>TNS1</i>     | 1stExon |
| cg16533767 | 2  | 23,736,552  | 0.000572 | 0.219 | 0.193 |  |  |     | <i>KLHL29</i>   | 5'UTR   |
| cg25534244 | 17 | 53,341,098  | 5.23E-09 | 0.219 | 0.186 |  |  |     | <i>HLF</i>      | TSS1500 |
| cg00902823 | 17 | 71,162,349  | 0.013187 | 0.219 | 0.138 |  |  |     | <i>SSTR2</i>    | 5'UTR   |
| cg13726724 | X  | 47,483,268  | 0.039925 | 0.219 | 0.064 |  |  |     |                 |         |
| cg08145373 | 11 | 2,407,008   | 5.78E-15 | 0.219 | 0.202 |  |  |     | <i>CD81</i>     | Body    |
| cg10179300 | 5  | 14,147,618  | 5.49E-06 | 0.219 | 0.158 |  |  |     | <i>TRIO</i>     | Body    |
| cg11621464 | 19 | 41,120,268  | 5.38E-08 | 0.219 | 0.179 |  |  |     | <i>LTBP4</i>    | Body    |
| cg24024056 | 10 | 102,415,556 | 0.038691 | 0.219 | 0.175 |  |  |     |                 |         |
| cg02744113 | 2  | 73,147,030  | 0.000775 | 0.219 | 0.181 |  |  |     | <i>EMX1</i>     | Body    |
| cg14482569 | 11 | 130,185,651 | 7.15E-10 | 0.219 | 0.213 |  |  |     | <i>ZBTB44</i>   | TSS1500 |
| cg01408486 | 5  | 139,027,024 | 3.12E-08 | 0.219 | 0.183 |  |  |     | <i>CXXC5</i>    | TSS1500 |
| cg06654537 | 13 | 100,641,317 | 0.000722 | 0.219 | 0.181 |  |  |     |                 |         |
| cg15172053 | 8  | 105,342,214 | 5.85E-07 | 0.219 | 0.205 |  |  |     |                 |         |
| cg18144593 | 2  | 71,116,411  | 0.010996 | 0.219 | 0.216 |  |  |     |                 |         |
| cg00182758 | 17 | 43,047,971  | 0.001042 | 0.219 | 0.187 |  |  |     |                 |         |
| cg00980060 | 1  | 14,849,511  | 8.77E-06 | 0.219 | 0.212 |  |  | Yes |                 |         |
| cg16617366 | 18 | 46,064,816  | 0.000571 | 0.219 | 0.099 |  |  |     | <i>KIAA0427</i> | TSS1500 |



|            |    |             |          |       |       |            |       |     |                 |         |
|------------|----|-------------|----------|-------|-------|------------|-------|-----|-----------------|---------|
| cg23699274 | 12 | 40,618,284  | 0.001951 | 0.219 | 0.172 |            |       |     | <i>LRRK2</i>    | TSS1500 |
| cg10016788 | 19 | 55,599,029  | 9.34E-07 | 0.219 | 0.211 |            |       |     | <i>EPS8L1</i>   | 3'UTR   |
| cg12140975 | 1  | 33,351,568  | 0.014846 | 0.219 | 0.237 |            |       |     | <i>HPCA</i>     | TSS1500 |
| cg23621496 | 1  | 211,667,487 | 6.56E-34 | 0.219 | 0.211 |            |       | Yes | <i>RD3</i>      | TSS1500 |
| cg05852760 | 7  | 23,508,224  | 0.040024 | 0.219 | 0.275 |            |       |     | <i>IGF2BP3</i>  | Body    |
| cg22344631 | 2  | 177,012,133 | 7.03E-06 | 0.219 | 0.174 |            |       |     |                 |         |
| cg21216477 | 12 | 54,440,773  | 5.62E-05 | 0.219 | 0.191 |            |       |     | <i>HOXC4</i>    | 5'UTR   |
| cg13850355 | 4  | 47,034,939  | 0.049851 | 0.219 | 0.241 |            |       |     | <i>GABRB1</i>   | Body    |
| cg14093255 | 9  | 14,081,508  | 7.66E-09 | 0.219 | 0.188 |            |       |     |                 |         |
| cg20553124 | 6  | 36,253,157  | 0.001843 | 0.219 | 0.216 |            |       |     | <i>PNPLA1</i>   | 5'UTR   |
| cg04787888 | 16 | 86,547,322  | 0.00201  | 0.219 | 0.215 |            |       |     | <i>FOXF1</i>    | 3'UTR   |
| cg05451094 | 17 | 26,557,385  | 4.85E-07 | 0.219 | 0.199 |            |       |     |                 |         |
| cg20257866 | 8  | 134,203,235 | 0.000228 | 0.219 | 0.248 |            |       |     | <i>WISP1</i>    | TSS200  |
| cg07685869 | 16 | 57,836,706  | 0.000469 | 0.218 | 0.192 | 1.2191E-05 | 0.081 |     | <i>KIFC3</i>    | TSS1500 |
| cg10604168 | 15 | 65,360,370  | 0.035171 | 0.218 | 0.111 | 4.41E-16   | 0.140 |     | <i>RASL12</i>   | 5'UTR   |
| cg23987137 | 5  | 58,653,624  | 4.07E-08 | 0.218 | 0.222 |            |       |     | <i>PDE4D</i>    | Body    |
| cg26140475 | 8  | 126,525,558 | 0.002119 | 0.218 | 0.205 |            |       |     |                 |         |
| cg02516189 | 9  | 139,268,092 | 4.75E-11 | 0.218 | 0.216 | 3.94E-22   | 0.153 |     | <i>CARD9</i>    | 1stExon |
| cg04158698 | 1  | 201,523,041 | 1.58E-09 | 0.218 | 0.213 |            |       |     |                 |         |
| cg11393995 | 6  | 2,842,359   | 0.019276 | 0.218 | 0.195 |            |       |     | <i>SERPINB1</i> | TSS1500 |
| cg18628367 | 7  | 157,475,548 | 8.26E-06 | 0.218 | 0.200 |            |       |     | <i>PTPRN2</i>   | Body    |
| cg01616178 | 8  | 41,755,140  | 0.037745 | 0.218 | 0.147 |            |       |     | <i>ANK1</i>     | TSS1500 |
| cg21289397 | 8  | 41,510,988  | 0.029817 | 0.218 | 0.287 |            |       |     | <i>ANK1</i>     | 3'UTR   |
| cg21752517 | 11 | 74,951,359  | 1.74E-05 | 0.218 | 0.173 |            |       |     |                 |         |
| cg24766308 | 5  | 147,162,432 | 0.036432 | 0.218 | 0.180 |            |       |     | <i>JAKMIP2</i>  | TSS200  |
| cg03137071 | 8  | 49,496,369  | 8.46E-10 | 0.218 | 0.221 |            |       |     |                 |         |
| cg13060157 | 1  | 113,286,610 | 0.016431 | 0.218 | 0.177 |            |       |     |                 |         |
| cg13565138 | 9  | 91,614,156  | 9.82E-15 | 0.218 | 0.209 |            |       |     | <i>S1PR3</i>    | 5'UTR   |
| cg21042919 | 17 | 36,621,139  | 7.03E-06 | 0.218 | 0.223 |            |       |     | <i>ARHGAP23</i> | Body    |
| cg03160935 | 9  | 132,242,593 | 4.06E-07 | 0.218 | 0.226 |            |       |     |                 |         |
| cg05501320 | 8  | 75,263,248  | 0.001588 | 0.218 | 0.148 |            |       |     | <i>GDAP1</i>    | Body    |
| cg13490235 | 1  | 217,004,524 | 2.14E-06 | 0.218 | 0.181 |            |       |     | <i>ESRRG</i>    | 5'UTR   |
| cg19806642 | 5  | 178,422,140 | 0.036466 | 0.218 | 0.255 |            |       |     | <i>GRM6</i>     | TSS200  |
| cg18088442 | 18 | 43,355,547  | 9.5E-05  | 0.218 | 0.192 |            |       |     |                 |         |

|            |    |             |          |       |       |            |       |  |                  |         |
|------------|----|-------------|----------|-------|-------|------------|-------|--|------------------|---------|
| cg02657654 | 2  | 45,154,029  | 3.4E-06  | 0.218 | 0.224 |            |       |  |                  |         |
| cg12461141 | 11 | 5,710,654   | 1.03E-07 | 0.218 | 0.229 | 0.00018243 | 0.099 |  | <i>TRIM22</i>    | TSS1500 |
| cg17290213 | 11 | 65,344,355  | 4.14E-10 | 0.218 | 0.213 |            |       |  | <i>EHBP1L1</i>   | Body    |
| cg23350294 | 8  | 57,359,992  | 0.001246 | 0.218 | 0.235 |            |       |  | <i>PENK</i>      | TSS1500 |
| cg23740610 | 17 | 72,257,002  | 2.7E-11  | 0.218 | 0.222 |            |       |  | <i>TTYH2</i>     | 3'UTR   |
| cg02705759 | 4  | 7,283,005   | 0.002454 | 0.218 | 0.152 |            |       |  | <i>SORCS2</i>    | Body    |
| cg26184501 | 17 | 48,139,723  | 4.58E-16 | 0.218 | 0.194 |            |       |  | <i>ITGA3</i>     | Body    |
| cg03217729 | 16 | 11,222,890  | 7.43E-10 | 0.218 | 0.210 |            |       |  | <i>CLEC16A</i>   | Body    |
| cg05755899 | 17 | 80,794,139  | 2.99E-05 | 0.218 | 0.190 |            |       |  | <i>TBCD</i>      | Body    |
| cg12279419 | 6  | 33,943,662  | 2.09E-06 | 0.218 | 0.208 |            |       |  |                  |         |
| cg21325822 | 3  | 154,497,591 | 0.000431 | 0.218 | 0.230 |            |       |  |                  |         |
| cg09025327 | 1  | 9,309,004   | 7.08E-10 | 0.218 | 0.232 |            |       |  | <i>H6PD</i>      | Body    |
| cg26519184 | 21 | 43,237,089  | 0.02272  | 0.218 | 0.288 |            |       |  | <i>PRDM15</i>    | Body    |
| cg27297263 | 6  | 86,160,468  | 0.008582 | 0.218 | 0.249 |            |       |  | <i>NT5E</i>      | Body    |
| cg18175809 | 3  | 62,355,525  | 0.023052 | 0.218 | 0.272 |            |       |  | <i>FEZF2</i>     | 3'UTR   |
| cg24402975 | 19 | 1,009,732   | 1.82E-21 | 0.218 | 0.192 |            |       |  | <i>C19orf6</i>   | 3'UTR   |
| cg09980058 | 19 | 18,898,325  | 0.000491 | 0.218 | 0.227 |            |       |  | <i>COMP</i>      | Body    |
| cg16551732 | 4  | 169,799,087 | 0.028296 | 0.218 | 0.111 |            |       |  | <i>PALLD</i>     | Body    |
| cg00857921 | 1  | 92,257,380  | 2.29E-13 | 0.218 | 0.220 |            |       |  | <i>TGFBR3</i>    | Body    |
| cg11385338 | 7  | 63,250,817  | 0.000175 | 0.218 | 0.238 |            |       |  |                  |         |
| cg12097883 | 17 | 62,774,939  | 0.008532 | 0.218 | 0.124 |            |       |  | <i>LOC146880</i> | Body    |
| cg17510121 | 6  | 35,182,910  | 8.2E-10  | 0.218 | 0.210 |            |       |  | <i>SCUBE3</i>    | Body    |
| cg13869942 | 1  | 151,878,061 | 1.02E-08 | 0.218 | 0.198 |            |       |  | <i>THEM4</i>     | Body    |
| cg21062347 | 11 | 62,783,543  | 5.5E-09  | 0.218 | 0.222 | 1.19E-08   | 0.092 |  | <i>SLC22A8</i>   | TSS1500 |
| cg23864949 | 8  | 99,984,534  | 2.35E-05 | 0.218 | 0.232 |            |       |  |                  |         |
| cg02108620 | 3  | 42,002,230  | 3.4E-10  | 0.218 | 0.227 |            |       |  | <i>ULK4</i>      | 5'UTR   |
| cg09665332 | 1  | 67,022,173  | 1.69E-06 | 0.218 | 0.211 |            |       |  | <i>SGIP1</i>     | Body    |
| cg01020413 | 2  | 66,810,487  | 0.000172 | 0.218 | 0.220 |            |       |  |                  |         |
| cg18164305 | 11 | 4,212,446   | 1.06E-06 | 0.218 | 0.195 |            |       |  |                  |         |
| cg24598145 | 8  | 1,955,069   | 4.79E-05 | 0.218 | 0.215 |            |       |  | <i>KBTBD11</i>   | 3'UTR   |
| cg03653026 | 9  | 135,115,118 | 3.19E-05 | 0.218 | 0.192 |            |       |  | <i>NTNG2</i>     | Body    |
| cg09735723 | 10 | 106,402,042 | 0.012645 | 0.218 | 0.163 |            |       |  | <i>SORCS3</i>    | Body    |
| cg14542839 | 11 | 35,547,074  | 0.000104 | 0.218 | 0.179 | 4.79E-16   | 0.164 |  | <i>PAMR1</i>     | 1stExon |
| cg00364016 | 6  | 10,113,648  | 2.73E-06 | 0.218 | 0.223 |            |       |  |                  |         |

|            |    |             |          |       |       |          |       |  |                  |         |
|------------|----|-------------|----------|-------|-------|----------|-------|--|------------------|---------|
| cg12068280 | 19 | 46,804,528  | 4E-08    | 0.218 | 0.202 |          |       |  | <i>HIF3A</i>     | 5'UTR   |
| cg13137458 | 11 | 77,160,347  | 1.55E-05 | 0.218 | 0.171 |          |       |  | <i>PAK1</i>      | 5'UTR   |
| cg17717169 | 1  | 178,621,037 | 1.08E-05 | 0.218 | 0.200 |          |       |  |                  |         |
| cg02227292 | 6  | 28,442,848  | 0.009898 | 0.218 | 0.228 |          |       |  |                  |         |
| cg03561565 | 8  | 99,438,624  | 0.000503 | 0.218 | 0.153 | 5.08E-11 | 0.145 |  | <i>KCNS2</i>     | TSS1500 |
| cg10236245 | 14 | 95,234,015  | 1.9E-06  | 0.218 | 0.214 |          |       |  |                  |         |
| cg17966192 | 2  | 108,994,116 | 0.022007 | 0.218 | 0.093 | 2.73E-16 | 0.155 |  | <i>SULT1C4</i>   | TSS1500 |
| cg19283806 | 18 | 66,389,420  | 0.033831 | 0.218 | 0.119 |          |       |  | <i>CCDC102B</i>  | 5'UTR   |
| cg02634341 | 1  | 179,711,583 | 0.040683 | 0.218 | 0.222 |          |       |  | <i>FAM163A</i>   | TSS1500 |
| cg16601461 | 2  | 114,048,829 | 2.69E-10 | 0.218 | 0.195 |          |       |  | <i>LOC440839</i> | Body    |
| cg26393629 | 14 | 21,191,859  | 0.002364 | 0.218 | 0.168 |          |       |  |                  |         |
| cg06901893 | 7  | 73,400,692  | 7.72E-11 | 0.218 | 0.221 |          |       |  |                  |         |
| cg12137450 | 8  | 22,458,046  | 1.21E-08 | 0.218 | 0.212 |          |       |  | <i>C8orf58</i>   | Body    |
| cg12893030 | 10 | 73,769,174  | 7.06E-10 | 0.218 | 0.197 |          |       |  | <i>CHST3</i>     | 3'UTR   |
| cg13536107 | 4  | 153,437,193 | 1.11E-20 | 0.218 | 0.202 |          |       |  | <i>FBXW7</i>     | 5'UTR   |
| cg09903430 | 1  | 44,172,605  | 0.043135 | 0.218 | 0.103 | 4.12E-11 | 0.099 |  | <i>ST3GAL3</i>   | TSS1500 |
| cg15422685 | 3  | 62,356,774  | 0.002301 | 0.218 | 0.249 |          |       |  | <i>FEZF2</i>     | Body    |
| cg01309213 | 16 | 331,821     | 0.01242  | 0.218 | 0.236 |          |       |  | <i>ARHGDI3</i>   | Body    |
| cg07107824 | 10 | 95,633,260  | 4.31E-08 | 0.218 | 0.248 |          |       |  |                  |         |
| cg06563450 | 5  | 55,737,211  | 0.01756  | 0.218 | 0.212 |          |       |  |                  |         |
| cg07562821 | 15 | 43,810,131  | 0.000119 | 0.218 | 0.251 |          |       |  | <i>MAP1A</i>     | 5'UTR   |
| cg19412669 | 1  | 36,839,270  | 0.016189 | 0.218 | 0.170 |          |       |  | <i>STK40</i>     | 5'UTR   |
| cg09829636 | 14 | 102,976,856 | 0.028254 | 0.218 | 0.143 |          |       |  | <i>ANKRD9</i>    | TSS1500 |
| cg17220055 | 1  | 42,248,998  | 5.06E-06 | 0.218 | 0.182 |          |       |  | <i>HIVEP3</i>    | 5'UTR   |
| cg10342908 | 15 | 43,415,239  | 0.007311 | 0.218 | 0.165 |          |       |  |                  |         |
| cg10694507 | 3  | 134,076,315 | 2.89E-21 | 0.218 | 0.211 |          |       |  | <i>AMOTL2</i>    | 3'UTR   |
| cg22125433 | 8  | 143,386,979 | 1.8E-05  | 0.218 | 0.205 |          |       |  | <i>TSNARE1</i>   | Body    |
| cg25557175 | 11 | 32,193,776  | 0.003442 | 0.218 | 0.251 |          |       |  |                  |         |
| cg08061755 | 11 | 9,781,826   | 9.93E-10 | 0.218 | 0.203 |          |       |  |                  |         |
| cg13821785 | 7  | 2,657,347   | 7.28E-13 | 0.218 | 0.218 |          |       |  |                  |         |
| cg24990131 | 6  | 6,320,710   | 0.043014 | 0.218 | 0.164 |          |       |  | <i>F13A1</i>     | 5'UTR   |
| cg13520394 | 12 | 57,635,339  | 2.55E-05 | 0.218 | 0.175 |          |       |  | <i>NDUFA4L2</i>  | TSS1500 |
| cg23402821 | 17 | 35,292,159  | 0.002605 | 0.218 | 0.195 |          |       |  |                  |         |
| cg03343013 | 1  | 43,473,097  | 7.46E-05 | 0.218 | 0.177 |          |       |  |                  |         |

|            |    |             |          |       |       |          |       |  |                 |         |
|------------|----|-------------|----------|-------|-------|----------|-------|--|-----------------|---------|
| cg05496768 | 10 | 77,872,288  | 9.67E-12 | 0.218 | 0.190 |          |       |  | <i>C10orf11</i> | Body    |
| cg06958766 | 14 | 76,446,087  | 0.007189 | 0.218 | 0.320 |          |       |  | <i>TGFB3</i>    | Body    |
| cg08495770 | 10 | 106,400,824 | 0.016329 | 0.218 | 0.087 |          |       |  | <i>SORCS3</i>   | TSS200  |
| cg09926027 | 9  | 87,285,693  | 0.002954 | 0.218 | 0.222 |          |       |  | <i>NTRK2</i>    | Body    |
| cg23104954 | 13 | 50,701,501  | 8.14E-05 | 0.218 | 0.202 |          |       |  |                 |         |
| cg03696974 | 16 | 29,888,670  | 0.000124 | 0.218 | 0.201 |          |       |  | <i>SEZ6L2</i>   | Body    |
| cg03778207 | 11 | 86,230,664  | 1.14E-09 | 0.218 | 0.221 |          |       |  | <i>ME3</i>      | Body    |
| cg08529825 | 1  | 114,489,550 | 2.2E-05  | 0.218 | 0.215 |          |       |  | <i>HIPK1</i>    | Body    |
| cg15095327 | 3  | 9,944,512   | 4.07E-06 | 0.218 | 0.223 | 4.69E-14 | 0.144 |  | <i>IL17RE</i>   | 1stExon |
| cg18661379 | 10 | 104,393,081 | 0.000126 | 0.218 | 0.205 |          |       |  | <i>SUFU</i>     | 3'UTR   |
| cg01421548 | 16 | 25,705,355  | 0.000479 | 0.218 | 0.234 |          |       |  | <i>HS3ST4</i>   | Body    |
| cg20286200 | 6  | 133,562,267 | 0.005276 | 0.218 | 0.273 | 9.48E-16 | 0.167 |  | <i>EYA4</i>     | TSS1500 |
| cg01580934 | 7  | 104,909,815 | 0.021025 | 0.218 | 0.226 |          |       |  | <i>SRPK2</i>    | TSS1500 |
| cg03840647 | 14 | 36,974,968  | 0.004835 | 0.218 | 0.248 |          |       |  | <i>SFTA3</i>    | Body    |
| cg12222588 | 18 | 34,823,808  | 1.19E-06 | 0.218 | 0.228 |          |       |  | <i>BRUNOL4</i>  | 3'UTR   |
| cg12415060 | 15 | 26,950,274  | 1.41E-08 | 0.218 | 0.173 |          |       |  | <i>GABRB3</i>   | Body    |
| cg14364903 | 3  | 48,631,834  | 7.02E-08 | 0.218 | 0.200 |          |       |  | <i>COL7A1</i>   | Body    |
| cg27552679 | 15 | 74,425,757  | 0.004396 | 0.218 | 0.193 |          |       |  | <i>ISLR2</i>    | Body    |
| cg06186450 | 1  | 154,942,910 | 0.000709 | 0.218 | 0.232 |          |       |  | <i>SHC1</i>     | 5'UTR   |
| cg13761284 | 9  | 130,708,393 | 5.67E-15 | 0.218 | 0.212 |          |       |  | <i>FAM102A</i>  | Body    |
| cg14215082 | 8  | 9,055,850   | 2.03E-12 | 0.218 | 0.210 |          |       |  |                 |         |
| cg17031967 | 6  | 25,297,487  | 3.8E-10  | 0.218 | 0.220 |          |       |  | <i>LRRC16A</i>  | Body    |
| cg04752042 | 1  | 46,951,683  | 0.003711 | 0.218 | 0.181 |          |       |  |                 |         |
| cg05962055 | 4  | 141,566,966 | 1.14E-14 | 0.218 | 0.217 |          |       |  | <i>TBC1D9</i>   | Body    |
| cg20236750 | 10 | 95,516,908  | 1.01E-10 | 0.218 | 0.219 |          |       |  | <i>LGI1</i>     | TSS1500 |
| cg02098752 | 5  | 176,024,005 | 0.020091 | 0.218 | 0.175 |          |       |  | <i>GPRIN1</i>   | Body    |
| cg18741372 | 19 | 45,906,156  | 2.17E-06 | 0.218 | 0.189 |          |       |  | <i>PPP1R13L</i> | 5'UTR   |
| cg25447873 | 15 | 63,548,963  | 4.23E-09 | 0.218 | 0.219 |          |       |  | <i>RAB8B</i>    | Body    |
| cg27301674 | 8  | 885,217     | 5.52E-06 | 0.218 | 0.224 |          |       |  |                 |         |
| cg01072639 | 20 | 5,891,781   | 1.09E-05 | 0.218 | 0.183 |          |       |  | <i>CHGB</i>     | TSS200  |
| cg03357664 | 1  | 29,446,693  | 1.88E-07 | 0.218 | 0.234 |          |       |  | <i>TMEM200B</i> | 3'UTR   |
| cg07155381 | 17 | 180,856     | 4.02E-12 | 0.218 | 0.193 |          |       |  | <i>RPH3AL</i>   | 5'UTR   |
| cg16824584 | 20 | 31,170,822  | 6.4E-06  | 0.218 | 0.181 |          |       |  |                 |         |
| cg06897860 | 1  | 54,965,458  | 0.037024 | 0.218 | 0.284 |          |       |  |                 |         |

|            |    |             |          |       |       |  |  |  |                 |         |
|------------|----|-------------|----------|-------|-------|--|--|--|-----------------|---------|
| cg00566320 | 1  | 32,172,204  | 2.06E-06 | 0.218 | 0.258 |  |  |  |                 |         |
| cg00880452 | 19 | 39,694,617  | 0.007453 | 0.218 | 0.176 |  |  |  | <i>SYCN</i>     | 1stExon |
| cg00943382 | 7  | 156,786,185 | 1.51E-08 | 0.218 | 0.208 |  |  |  |                 |         |
| cg10682560 | 11 | 31,845,148  | 0.015151 | 0.218 | 0.293 |  |  |  |                 |         |
| cg15117372 | 6  | 35,992,219  | 7.94E-15 | 0.218 | 0.203 |  |  |  | <i>SLC26A8</i>  | 5'UTR   |
| cg16421871 | 13 | 113,634,978 | 2.07E-06 | 0.218 | 0.198 |  |  |  | <i>MCF2L</i>    | Body    |
| cg24085885 | 19 | 18,879,446  | 8.2E-26  | 0.218 | 0.227 |  |  |  | <i>CRTC1</i>    | Body    |
| cg26386624 | 12 | 54,366,859  | 0.000292 | 0.218 | 0.266 |  |  |  | <i>HOXC11</i>   | TSS200  |
| cg12421834 | 6  | 168,714,673 | 3.75E-12 | 0.218 | 0.197 |  |  |  | <i>DACT2</i>    | Body    |
| cg04137171 | 15 | 79,104,232  | 7.12E-07 | 0.218 | 0.146 |  |  |  | <i>ADAMTS7</i>  | TSS1500 |
| cg04303330 | 5  | 131,992,430 | 1.66E-08 | 0.218 | 0.208 |  |  |  | <i>IL13</i>     | TSS1500 |
| cg11381404 | 3  | 104,813,499 | 2.54E-06 | 0.218 | 0.212 |  |  |  |                 |         |
| cg00213123 | 15 | 75,019,070  | 8.97E-10 | 0.218 | 0.203 |  |  |  | <i>CYP1A1</i>   | TSS1500 |
| cg02895192 | X  | 153,190,027 | 0.006909 | 0.218 | 0.227 |  |  |  | <i>ARHGAP4</i>  | Body    |
| cg27295595 | 16 | 29,796,756  | 2.31E-07 | 0.218 | 0.226 |  |  |  |                 |         |
| cg13733266 | 11 | 85,397,216  | 1.55E-06 | 0.218 | 0.175 |  |  |  | <i>CCDC89</i>   | 1stExon |
| cg16312968 | 6  | 6,900,945   | 6.56E-10 | 0.218 | 0.202 |  |  |  |                 |         |
| cg17840501 | 17 | 75,385,086  | 1.52E-07 | 0.218 | 0.205 |  |  |  | <i>SEPT9</i>    | 5'UTR   |
| cg20205704 | 17 | 2,213,196   | 1.49E-12 | 0.218 | 0.202 |  |  |  | <i>SRR</i>      | 5'UTR   |
| cg00436476 | 6  | 26,240,505  | 0.04066  | 0.218 | 0.264 |  |  |  | <i>HIST1H4F</i> | TSS200  |
| cg06196801 | 12 | 121,164,025 | 8.72E-05 | 0.218 | 0.196 |  |  |  | <i>ACADS</i>    | Body    |
| cg23102014 | 15 | 70,574,295  | 5.69E-05 | 0.218 | 0.233 |  |  |  |                 |         |
| cg00699219 | 4  | 174,422,442 | 0.000183 | 0.218 | 0.247 |  |  |  |                 |         |
| cg07196577 | 1  | 109,850,486 | 1.92E-10 | 0.218 | 0.215 |  |  |  | <i>MYBPHL</i>   | TSS1500 |
| cg14925328 | 2  | 207,913,718 | 3.01E-11 | 0.218 | 0.218 |  |  |  |                 |         |
| cg17605814 | 11 | 44,585,659  | 2.19E-06 | 0.218 | 0.219 |  |  |  | <i>CD82</i>     | TSS1500 |
| cg23953176 | 2  | 947,515     | 4.49E-15 | 0.218 | 0.206 |  |  |  | <i>SNTG2</i>    | Body    |
| cg11960629 | 10 | 91,295,317  | 0.028464 | 0.218 | 0.253 |  |  |  | <i>SLC16A12</i> | TSS200  |
| cg04138103 | 5  | 38,796,759  | 2.3E-09  | 0.218 | 0.218 |  |  |  |                 |         |
| cg13761321 | 9  | 97,768,771  | 0.022448 | 0.218 | 0.127 |  |  |  | <i>C9orf3</i>   | Body    |
| cg14657725 | 8  | 99,959,549  | 2.73E-07 | 0.218 | 0.223 |  |  |  | <i>OSR2</i>     | 5'UTR   |
| cg14703061 | 11 | 120,435,915 | 0.023812 | 0.218 | 0.175 |  |  |  |                 |         |
| cg16574134 | 10 | 102,588,315 | 0.04627  | 0.218 | 0.140 |  |  |  | <i>PAX2</i>     | 3'UTR   |
| cg06973615 | 2  | 175,208,761 | 0.00084  | 0.218 | 0.225 |  |  |  |                 |         |

|            |    |             |          |       |       |  |  |     |                |         |
|------------|----|-------------|----------|-------|-------|--|--|-----|----------------|---------|
| cg10568624 | 9  | 100,619,991 | 0.013054 | 0.218 | 0.250 |  |  |     |                |         |
| cg15413523 | 5  | 133,451,625 | 7.52E-15 | 0.218 | 0.185 |  |  |     | <i>TCF7</i>    | 5'UTR   |
| cg07378309 | 3  | 121,312,164 | 6.78E-05 | 0.218 | 0.220 |  |  |     | <i>FBXO40</i>  | TSS200  |
| cg14067761 | 2  | 23,840,739  | 6.72E-05 | 0.218 | 0.231 |  |  |     | <i>KLHL29</i>  | Body    |
| cg15058645 | 2  | 175,528,343 | 1.35E-13 | 0.218 | 0.211 |  |  |     | <i>WIPF1</i>   | 5'UTR   |
| cg23142799 | 13 | 26,625,089  | 0.000967 | 0.218 | 0.095 |  |  |     | <i>SHISA2</i>  | 1stExon |
| cg00835279 | 2  | 3,642,710   | 2.22E-06 | 0.218 | 0.171 |  |  |     | <i>COLEC11</i> | 1stExon |
| cg09467436 | 2  | 72,079,424  | 5.13E-17 | 0.218 | 0.197 |  |  |     |                |         |
| cg12169875 | 6  | 29,856,193  | 0.023781 | 0.218 | 0.177 |  |  |     | <i>HLA-H</i>   | Body    |
| cg24575083 | 11 | 7,695,485   | 9.21E-06 | 0.218 | 0.187 |  |  |     | <i>CYB5R2</i>  | TSS1500 |
| cg01154355 | 5  | 124,043,109 | 8.2E-05  | 0.218 | 0.229 |  |  |     | <i>ZNF608</i>  | Body    |
| cg03695236 | 7  | 157,369,121 | 0.001295 | 0.218 | 0.146 |  |  |     | <i>PTPRN2</i>  | Body    |
| cg11575295 | 7  | 158,250,911 | 2.37E-06 | 0.218 | 0.221 |  |  |     | <i>PTPRN2</i>  | Body    |
| cg19122260 | 17 | 78,808,570  | 1.15E-11 | 0.218 | 0.212 |  |  |     | <i>RPTOR</i>   | Body    |
| cg11583762 | 8  | 39,172,020  | 0.011076 | 0.218 | 0.232 |  |  |     | <i>ADAM5P</i>  | TSS200  |
| cg18449021 | 5  | 107,004,816 | 5.37E-06 | 0.218 | 0.224 |  |  |     | <i>EFNA5</i>   | Body    |
| cg18984103 | 14 | 104,163,025 | 2.29E-11 | 0.218 | 0.217 |  |  |     | <i>KLC1</i>    | Body    |
| cg20793420 | 22 | 38,861,635  | 3.55E-06 | 0.218 | 0.242 |  |  |     |                |         |
| cg04478180 | 4  | 76,932,862  | 0.003387 | 0.218 | 0.233 |  |  |     | <i>ART3</i>    | 5'UTR   |
| cg05215272 | 17 | 6,899,095   | 1.64E-05 | 0.218 | 0.186 |  |  |     | <i>ALOX12</i>  | TSS1500 |
| cg16711124 | 16 | 29,796,373  | 2.08E-06 | 0.218 | 0.214 |  |  |     |                |         |
| cg09541576 | 2  | 44,873,248  | 5.51E-08 | 0.218 | 0.229 |  |  | Yes | <i>C2orf34</i> | Body    |
| cg08443357 | 20 | 1,310,000   | 0.000272 | 0.218 | 0.206 |  |  |     | <i>SDCBP2</i>  | TSS200  |
| cg00350199 | 11 | 67,418,213  | 1.8E-13  | 0.218 | 0.198 |  |  |     | <i>ACY3</i>    | TSS200  |
| cg23698978 | 7  | 20,838,631  | 1.44E-05 | 0.218 | 0.164 |  |  |     |                |         |
| cg05121790 | 1  | 12,123,554  | 0.015257 | 0.218 | 0.130 |  |  |     | <i>TNFRSF8</i> | 5'UTR   |
| cg02124022 | 4  | 54,974,886  | 5.26E-06 | 0.218 | 0.219 |  |  |     |                |         |
| cg00542992 | 5  | 141,595,654 | 0.015826 | 0.218 | 0.182 |  |  |     |                |         |
| cg11781986 | 14 | 24,808,787  | 7.42E-12 | 0.218 | 0.229 |  |  |     | <i>RIPK3</i>   | Body    |
| cg26422458 | 1  | 79,472,452  | 7.51E-08 | 0.218 | 0.208 |  |  |     | <i>ELTD1</i>   | 5'UTR   |
| cg13910813 | 9  | 117,157,614 | 0.000185 | 0.218 | 0.240 |  |  |     | <i>AKNA</i>    | TSS1500 |
| cg27090062 | 5  | 92,939,842  | 1.12E-09 | 0.218 | 0.211 |  |  |     |                |         |
| cg19951298 | 6  | 10,883,054  | 2.6E-07  | 0.218 | 0.195 |  |  |     | <i>GCM2</i>    | TSS1500 |
| cg12426146 | 4  | 140,657,110 | 1.33E-06 | 0.218 | 0.205 |  |  |     | <i>MAML3</i>   | Body    |

|            |    |             |          |       |       |          |       |  |                 |         |
|------------|----|-------------|----------|-------|-------|----------|-------|--|-----------------|---------|
| cg03408271 | 4  | 13,537,647  | 0.010257 | 0.218 | 0.221 |          |       |  |                 |         |
| cg11133524 | 8  | 145,104,106 | 0.003182 | 0.218 | 0.197 |          |       |  |                 |         |
| cg08635097 | 13 | 44,833,857  | 4.35E-05 | 0.218 | 0.177 |          |       |  |                 |         |
| cg14447193 | 9  | 87,433,864  | 1.81E-08 | 0.218 | 0.188 |          |       |  | <i>NTRK2</i>    | Body    |
| cg16739178 | 16 | 85,470,674  | 0.003023 | 0.218 | 0.169 |          |       |  |                 |         |
| cg24813038 | 4  | 85,404,026  | 9.57E-05 | 0.218 | 0.199 |          |       |  |                 |         |
| cg11270393 | 2  | 96,991,017  | 0.022609 | 0.218 | 0.291 |          |       |  | <i>ITPRIPL1</i> | TSS1500 |
| cg04585669 | 3  | 11,599,640  | 1.07E-05 | 0.218 | 0.245 |          |       |  | <i>VGLL4</i>    | 3'UTR   |
| cg06361606 | 1  | 154,915,180 | 5.58E-08 | 0.218 | 0.219 |          |       |  |                 |         |
| cg08826839 | 2  | 163,100,125 | 0.000594 | 0.218 | 0.175 | 3.17E-07 | 0.129 |  | <i>FAP</i>      | TSS200  |
| cg15135803 | 1  | 12,579,742  | 5.15E-10 | 0.218 | 0.225 |          |       |  |                 |         |
| cg00786685 | 2  | 218,842,585 | 1.61E-11 | 0.218 | 0.225 |          |       |  |                 |         |
| cg05380019 | 7  | 19,146,555  | 0.00633  | 0.218 | 0.192 |          |       |  |                 |         |
| cg10298052 | 10 | 57,391,055  | 8.44E-07 | 0.218 | 0.179 |          |       |  |                 |         |
| cg15111638 | 11 | 16,631,993  | 1.08E-06 | 0.218 | 0.215 |          |       |  |                 |         |
| cg18616175 | 20 | 39,321,473  | 0.000916 | 0.218 | 0.226 |          |       |  |                 |         |
| cg19651694 | 11 | 71,955,164  | 0.003262 | 0.218 | 0.190 |          |       |  | <i>PHOX2A</i>   | 1stExon |
| cg20852250 | 3  | 72,149,422  | 5.12E-07 | 0.218 | 0.203 |          |       |  |                 |         |
| cg13207501 | 1  | 38,470,665  | 9.06E-05 | 0.218 | 0.178 |          |       |  | <i>FHL3</i>     | 5'UTR   |
| cg23601374 | 2  | 240,213,173 | 1.18E-10 | 0.218 | 0.207 |          |       |  | <i>HDAC4</i>    | Body    |
| cg03677492 | 17 | 80,273,969  | 0.000964 | 0.217 | 0.214 |          |       |  | <i>CD7</i>      | Body    |
| cg00491180 | 16 | 2,892,604   | 0.00057  | 0.217 | 0.224 |          |       |  | <i>TMPRSS8</i>  | Body    |
| cg12352960 | 10 | 43,428,578  | 0.026322 | 0.217 | 0.357 |          |       |  |                 |         |
| cg02945385 | 3  | 9,246,501   | 3.62E-20 | 0.217 | 0.209 |          |       |  | <i>SRGAP3</i>   | Body    |
| cg12046758 | 17 | 59,474,922  | 0.033986 | 0.217 | 0.085 |          |       |  |                 |         |
| cg13493563 | 9  | 132,260,096 | 3.67E-08 | 0.217 | 0.227 |          |       |  |                 |         |
| cg10727673 | 3  | 136,537,267 | 9.25E-08 | 0.217 | 0.219 |          |       |  | <i>TMEM22</i>   | TSS1500 |
| cg06825661 | 18 | 13,260,398  | 0.007262 | 0.217 | 0.218 |          |       |  | <i>C18orf1</i>  | 5'UTR   |
| cg06850005 | 10 | 35,926,564  | 6.08E-08 | 0.217 | 0.202 |          |       |  |                 |         |
| cg21430685 | 8  | 29,387,008  | 9.69E-06 | 0.217 | 0.184 |          |       |  |                 |         |
| cg14806083 | 6  | 169,002,120 | 6.76E-17 | 0.217 | 0.206 |          |       |  | <i>SMOC2</i>    | Body    |
| cg20774846 | 8  | 105,479,420 | 0.000702 | 0.217 | 0.199 | 6.23E-21 | 0.159 |  | <i>DPYS</i>     | TSS200  |
| cg12993163 | 3  | 157,821,407 | 0.048988 | 0.217 | 0.194 |          |       |  | <i>SHOX2</i>    | Body    |
| cg07229688 | 18 | 59,564,213  | 0.000141 | 0.217 | 0.262 |          |       |  |                 |         |

|            |    |             |          |       |       |          |       |  |                  |         |
|------------|----|-------------|----------|-------|-------|----------|-------|--|------------------|---------|
| cg20449379 | 8  | 968,983     | 1.33E-10 | 0.217 | 0.206 |          |       |  |                  |         |
| cg00782828 | 1  | 54,940,382  | 0.000105 | 0.217 | 0.089 |          |       |  |                  |         |
| cg02485922 | 16 | 30,379,391  | 5.97E-05 | 0.217 | 0.176 |          |       |  | <i>TBC1D10B</i>  | Body    |
| cg05210266 | 8  | 65,282,507  | 0.006109 | 0.217 | 0.277 |          |       |  |                  |         |
| cg13515064 | 13 | 113,611,440 | 6.28E-24 | 0.217 | 0.205 |          |       |  |                  |         |
| cg17355191 | 9  | 136,039,576 | 0.000199 | 0.217 | 0.134 |          |       |  | <i>GBGT1</i>     | TSS1500 |
| cg07866001 | 5  | 14,440,492  | 5.53E-09 | 0.217 | 0.222 |          |       |  | <i>TRIO</i>      | Body    |
| cg14770102 | 11 | 58,984,446  | 0.038365 | 0.217 | 0.157 |          |       |  |                  |         |
| cg18262201 | 10 | 6,187,854   | 2.87E-06 | 0.217 | 0.194 |          |       |  | <i>PFKFB3</i>    | Body    |
| cg20238355 | 7  | 100,612,155 | 0.010952 | 0.217 | 0.299 |          |       |  | <i>MUC12</i>     | TSS1500 |
| cg02102456 | 2  | 100,824,336 | 1.01E-20 | 0.217 | 0.200 |          |       |  |                  |         |
| cg03024301 | 6  | 52,440,589  | 8.37E-11 | 0.217 | 0.206 |          |       |  | <i>TRAM2</i>     | Body    |
| cg11105610 | 17 | 76,976,352  | 1.89E-09 | 0.217 | 0.190 | 1.48E-16 | 0.139 |  | <i>LGALS3BP</i>  | TSS1500 |
| cg24634746 | 1  | 7,538,723   | 0.00073  | 0.217 | 0.250 |          |       |  | <i>CAMTA1</i>    | Body    |
| cg23222745 | 6  | 27,791,912  | 0.001437 | 0.217 | 0.187 |          |       |  | <i>HIST1H4J</i>  | 1stExon |
| cg15056128 | 17 | 38,821,487  | 0.010309 | 0.217 | 0.213 |          |       |  | <i>KRT222</i>    | TSS200  |
| cg05231308 | 2  | 27,531,163  | 4.93E-09 | 0.217 | 0.196 |          |       |  | <i>UCN</i>       | TSS200  |
| cg11549025 | 7  | 75,994,082  | 0.00011  | 0.217 | 0.232 |          |       |  |                  |         |
| cg18127395 | 7  | 95,433,546  | 2.89E-06 | 0.217 | 0.197 |          |       |  | <i>DYNC1I1</i>   | 5'UTR   |
| cg05519187 | 17 | 35,303,387  | 0.001127 | 0.217 | 0.307 |          |       |  |                  |         |
| cg09113474 | 6  | 1,601,369   | 9E-19    | 0.217 | 0.183 |          |       |  |                  |         |
| cg10233454 | 12 | 57,529,389  | 6.67E-08 | 0.217 | 0.221 |          |       |  | <i>LRP1</i>      | Body    |
| cg16276982 | 15 | 29,968,032  | 5.41E-10 | 0.217 | 0.194 |          |       |  |                  |         |
| cg00073837 | 2  | 223,177,008 | 0.01728  | 0.217 | 0.224 |          |       |  |                  |         |
| cg00146004 | 16 | 3,241,434   | 0.007985 | 0.217 | 0.184 |          |       |  |                  |         |
| cg18556792 | 2  | 43,445,934  | 0.003007 | 0.217 | 0.203 |          |       |  |                  |         |
| cg14501219 | 17 | 62,775,713  | 0.000727 | 0.217 | 0.131 |          |       |  | <i>LOC146880</i> | Body    |
| cg19795292 | 2  | 102,952,285 | 1.7E-10  | 0.217 | 0.227 |          |       |  | <i>IL1RL1</i>    | 5'UTR   |
| cg26258213 | 10 | 127,220,321 | 3.96E-05 | 0.217 | 0.215 |          |       |  |                  |         |
| cg01700462 | 20 | 45,179,230  | 1.69E-09 | 0.217 | 0.199 |          |       |  | <i>C20orf123</i> | TSS200  |
| cg08579858 | 22 | 29,709,964  | 0.000386 | 0.217 | 0.226 |          |       |  | <i>RASL10A</i>   | Body    |
| cg10256976 | 11 | 20,078,682  | 0.000101 | 0.217 | 0.193 |          |       |  | <i>NAV2</i>      | Body    |
| cg14138540 | 15 | 93,571,988  | 0.000153 | 0.217 | 0.276 |          |       |  |                  |         |
| cg15301794 | 11 | 31,822,243  | 2.64E-05 | 0.217 | 0.178 |          |       |  | <i>PAX6</i>      | Body    |



|            |    |             |          |       |       |            |       |  |                 |         |
|------------|----|-------------|----------|-------|-------|------------|-------|--|-----------------|---------|
| cg18212762 | 11 | 64,556,654  | 8.03E-12 | 0.217 | 0.218 |            |       |  | <i>MAP4K2</i>   | 3'UTR   |
| cg00921973 | 9  | 130,701,076 | 1.14E-08 | 0.217 | 0.232 |            |       |  | <i>DPM2</i>     | TSS1500 |
| cg10767223 | 5  | 1,295,799   | 2.25E-07 | 0.217 | 0.201 |            |       |  | <i>TERT</i>     | TSS1500 |
| cg00478479 | 19 | 40,904,851  | 1.83E-06 | 0.217 | 0.206 |            |       |  | <i>PRX</i>      | Body    |
| cg25800500 | 2  | 97,505,275  | 1.92E-05 | 0.217 | 0.202 |            |       |  | <i>ANKRD23</i>  | 3'UTR   |
| cg19601035 | 12 | 48,399,140  | 9.65E-07 | 0.217 | 0.201 | 0.00000112 | 0.073 |  | <i>COL2A1</i>   | TSS1500 |
| cg13284614 | 3  | 52,569,169  | 2.28E-05 | 0.217 | 0.184 |            |       |  | <i>NT5DC2</i>   | TSS200  |
| cg13812927 | 9  | 89,517,863  | 2.61E-06 | 0.217 | 0.219 |            |       |  |                 |         |
| cg16235891 | 7  | 158,243,546 | 1.15E-09 | 0.217 | 0.219 |            |       |  | <i>PTPRN2</i>   | Body    |
| cg19262637 | 1  | 240,783,328 | 0.001911 | 0.217 | 0.168 |            |       |  |                 |         |
| cg19594218 | 1  | 62,660,556  | 0.000816 | 0.217 | 0.187 |            |       |  | <i>L1TD1</i>    | 1stExon |
| cg23525438 | 6  | 17,016,226  | 3.72E-06 | 0.217 | 0.241 |            |       |  |                 |         |
| cg11847222 | 5  | 77,268,624  | 0.003817 | 0.217 | 0.205 |            |       |  |                 |         |
| cg19236794 | 1  | 1,181,769   | 3.39E-10 | 0.217 | 0.217 |            |       |  | <i>FAM132A</i>  | Body    |
| cg26927232 | 17 | 2,135,631   | 9.95E-15 | 0.217 | 0.219 |            |       |  | <i>SMG6</i>     | Body    |
| cg27404023 | 2  | 162,283,994 | 0.039093 | 0.217 | 0.183 |            |       |  |                 |         |
| cg25500196 | 17 | 40,464,780  | 3.08E-15 | 0.217 | 0.215 |            |       |  |                 |         |
| cg10376827 | 10 | 88,730,324  | 0.000647 | 0.217 | 0.166 |            |       |  | <i>AGAP11</i>   | TSS200  |
| cg12427162 | 1  | 168,198,488 | 9.06E-14 | 0.217 | 0.186 |            |       |  | <i>SFT2D2</i>   | Body    |
| cg13017239 | 2  | 131,185,379 | 0.002504 | 0.217 | 0.247 |            |       |  |                 |         |
| cg22942704 | 1  | 20,813,574  | 0.013389 | 0.217 | 0.100 |            |       |  | <i>CAMK2N1</i>  | TSS1500 |
| cg13208704 | 17 | 36,761,029  | 8.27E-07 | 0.217 | 0.211 |            |       |  | <i>SRCIN1</i>   | Body    |
| cg13583230 | 14 | 24,809,297  | 4.58E-05 | 0.217 | 0.200 |            |       |  | <i>RIPK3</i>    | TSS200  |
| cg18210365 | 15 | 65,066,710  | 1.67E-11 | 0.217 | 0.215 |            |       |  | <i>RBPM2</i>    | Body    |
| cg22365906 | 12 | 99,548,546  | 4.85E-07 | 0.217 | 0.177 |            |       |  | <i>ANKS1B</i>   | TSS200  |
| cg12829142 | 7  | 23,529,999  | 0.000139 | 0.217 | 0.178 |            |       |  | <i>RPS2P32</i>  | TSS200  |
| cg02155398 | 2  | 45,160,490  | 6.27E-06 | 0.217 | 0.218 |            |       |  |                 |         |
| cg20805367 | 17 | 6,918,952   | 6.79E-07 | 0.217 | 0.197 |            |       |  | <i>C17orf49</i> | Body    |
| cg00258597 | 8  | 23,567,607  | 6.62E-06 | 0.217 | 0.180 |            |       |  |                 |         |
| cg04380519 | 17 | 61,778,366  | 1.63E-05 | 0.217 | 0.217 |            |       |  | <i>LIMD2</i>    | TSS1500 |
| cg09267467 | 1  | 178,914,986 | 1.17E-05 | 0.217 | 0.205 |            |       |  |                 |         |
| cg04651137 | 7  | 23,287,222  | 0.00093  | 0.217 | 0.218 |            |       |  | <i>GPNMB</i>    | Body    |
| cg08422803 | 21 | 46,341,067  | 3.81E-08 | 0.217 | 0.217 |            |       |  | <i>ITGB2</i>    | TSS200  |
| cg09357761 | 14 | 61,933,059  | 1.44E-13 | 0.217 | 0.214 |            |       |  | <i>PRKCH</i>    | Body    |

|            |    |             |          |       |       |  |  |  |                     |         |
|------------|----|-------------|----------|-------|-------|--|--|--|---------------------|---------|
| cg09924848 | 10 | 126,308,486 | 8.67E-11 | 0.217 | 0.206 |  |  |  | <i>FAM53B</i>       | 3'UTR   |
| cg04434896 | 8  | 23,562,003  | 6.92E-05 | 0.217 | 0.197 |  |  |  | <i>NKX2-6</i>       | Body    |
| cg12076463 | 4  | 85,418,265  | 6.48E-10 | 0.217 | 0.218 |  |  |  | <i>NKX6-1</i>       | Body    |
| cg13078671 | 12 | 6,662,193   | 3.3E-14  | 0.217 | 0.221 |  |  |  | <i>IFFO1</i>        | Body    |
| cg16025118 | 12 | 114,273,678 | 2.19E-06 | 0.217 | 0.221 |  |  |  | <i>RBM19</i>        | Body    |
| cg20219381 | 8  | 101,118,083 | 2.51E-06 | 0.217 | 0.222 |  |  |  | <i>RGS22</i>        | Body    |
| cg21158087 | 17 | 58,216,415  | 0.005473 | 0.217 | 0.230 |  |  |  |                     |         |
| cg07229001 | 15 | 70,897,224  | 0.015177 | 0.217 | 0.279 |  |  |  |                     |         |
| cg07358855 | 8  | 99,960,843  | 4.38E-06 | 0.217 | 0.210 |  |  |  | <i>OSR2</i>         | 5'UTR   |
| cg20970369 | 1  | 111,744,108 | 1.03E-07 | 0.217 | 0.201 |  |  |  | <i>DENND2D</i>      | TSS1500 |
| cg15422382 | 10 | 81,141,532  | 6.2E-14  | 0.217 | 0.193 |  |  |  |                     |         |
| cg00019759 | 1  | 212,687,842 | 0.001399 | 0.217 | 0.235 |  |  |  |                     |         |
| cg03714110 | 5  | 92,923,623  | 2.15E-05 | 0.217 | 0.185 |  |  |  | <i>NR2F1</i>        | Body    |
| cg25464265 | 1  | 221,063,484 | 2.75E-05 | 0.217 | 0.187 |  |  |  |                     |         |
| cg26813646 | 10 | 50,817,651  | 0.01685  | 0.217 | 0.258 |  |  |  | <i>SLC18A3</i>      | TSS1500 |
| cg06563089 | 12 | 75,601,157  | 3.01E-05 | 0.217 | 0.242 |  |  |  | <i>KCNC2</i>        | Body    |
| cg10571987 | 6  | 41,528,395  | 2.47E-06 | 0.217 | 0.209 |  |  |  | <i>FOXP4</i>        | 5'UTR   |
| cg11390073 | 12 | 29,302,515  | 0.003663 | 0.217 | 0.188 |  |  |  |                     |         |
| cg21990700 | 12 | 7,260,776   | 0.004488 | 0.217 | 0.180 |  |  |  | <i>LOC283314</i>    | TSS200  |
| cg07500325 | 21 | 47,062,264  | 0.001699 | 0.217 | 0.113 |  |  |  |                     |         |
| cg10253847 | 6  | 28,227,085  | 4.69E-06 | 0.217 | 0.210 |  |  |  | <i>NKAPL</i>        | TSS200  |
| cg20268039 | 7  | 25,900,167  | 0.001374 | 0.217 | 0.202 |  |  |  |                     |         |
| cg26311734 | 4  | 94,755,520  | 7.21E-05 | 0.217 | 0.201 |  |  |  |                     |         |
| cg08720517 | 5  | 138,729,919 | 0.002451 | 0.217 | 0.232 |  |  |  | <i>LOC389333</i>    | 1stExon |
| cg13487918 | 3  | 38,067,350  | 0.000785 | 0.217 | 0.176 |  |  |  | <i>PLCD1</i>        | TSS1500 |
| cg20884298 | 13 | 46,190,037  | 2.88E-05 | 0.217 | 0.242 |  |  |  | <i>FAM194B</i>      | TSS200  |
| cg24361291 | 19 | 16,394,499  | 1.49E-05 | 0.217 | 0.206 |  |  |  |                     |         |
| cg07740306 | 18 | 77,246,369  | 4.69E-12 | 0.217 | 0.215 |  |  |  | <i>NFATC1</i>       | Body    |
| cg21201099 | 17 | 59,482,446  | 1.97E-05 | 0.217 | 0.226 |  |  |  | <i>TBX2</i>         | Body    |
| cg22380508 | 11 | 63,381,144  | 0.018553 | 0.217 | 0.110 |  |  |  | <i>PLA2G16</i>      | Body    |
| cg06410191 | 5  | 115,298,920 | 0.000477 | 0.217 | 0.244 |  |  |  | <i>LVRN</i>         | 1stExon |
| cg13026370 | 18 | 8,367,098   | 0.000184 | 0.217 | 0.180 |  |  |  | <i>LOC100192426</i> | TSS200  |
| cg14632140 | 12 | 16,758,112  | 0.000338 | 0.217 | 0.166 |  |  |  | <i>LMO3</i>         | 5'UTR   |
| cg12243453 | 11 | 113,775,400 | 5.52E-10 | 0.217 | 0.206 |  |  |  | <i>HTR3B</i>        | TSS200  |

|            |    |             |          |       |       |          |       |     |                 |         |
|------------|----|-------------|----------|-------|-------|----------|-------|-----|-----------------|---------|
| cg19611392 | 18 | 56,888,922  | 0.001062 | 0.217 | 0.267 |          |       |     | <i>GRP</i>      | Body    |
| cg09807148 | 17 | 34,122,069  | 0.003525 | 0.217 | 0.174 |          |       |     | <i>MMP28</i>    | Body    |
| cg02583525 | 2  | 26,624,612  | 0.041054 | 0.217 | 0.060 |          |       |     | <i>C2orf39</i>  | TSS200  |
| cg07377994 | 17 | 55,533,142  | 5.45E-08 | 0.217 | 0.211 |          |       | Yes | <i>MSI2</i>     | Body    |
| cg09533845 | 8  | 81,290,007  | 0.013525 | 0.217 | 0.143 |          |       |     |                 |         |
| cg14826211 | 2  | 23,747,197  | 3.64E-10 | 0.217 | 0.202 |          |       |     | <i>KLHL29</i>   | 5'UTR   |
| cg03053788 | 8  | 65,498,340  | 0.00274  | 0.217 | 0.251 |          |       | Yes |                 |         |
| cg12152002 | 14 | 57,279,496  | 0.002855 | 0.217 | 0.289 |          |       |     | <i>OTX2OS1</i>  | TSS1500 |
| cg09335713 | 22 | 42,828,418  | 9.12E-15 | 0.217 | 0.201 |          |       |     | <i>NFAM1</i>    | TSS200  |
| cg14205791 | 12 | 124,800,227 | 2.25E-14 | 0.217 | 0.207 |          |       |     | <i>FAM101A</i>  | 3'UTR   |
| cg04292993 | 7  | 73,894,730  | 0.038699 | 0.217 | 0.159 |          |       |     | <i>GTF2IRD1</i> | 5'UTR   |
| cg20261167 | 4  | 88,896,942  | 7.95E-06 | 0.217 | 0.209 | 1.06E-12 | 0.218 |     | <i>SPP1</i>     | 1stExon |
| cg03879594 | 16 | 85,207,569  | 1.5E-15  | 0.217 | 0.222 |          |       |     |                 |         |
| cg06569139 | 8  | 101,117,949 | 5.42E-21 | 0.217 | 0.221 |          |       |     | <i>RGS22</i>    | Body    |
| cg07105285 | 11 | 92,702,663  | 6.83E-10 | 0.217 | 0.200 |          |       |     | <i>MTNR1B</i>   | TSS200  |
| cg10423771 | 10 | 50,604,499  | 0.018648 | 0.217 | 0.240 |          |       |     |                 |         |
| cg19566658 | 7  | 100,466,241 | 4.34E-31 | 0.217 | 0.212 |          |       |     | <i>TRIP6</i>    | Body    |
| cg19587237 | 1  | 54,797,076  | 0.008872 | 0.217 | 0.106 |          |       |     | <i>SSBP3</i>    | Body    |
| cg01033642 | 16 | 81,564,192  | 0.00031  | 0.217 | 0.186 |          |       |     | <i>CMIP</i>     | Body    |
| cg06733155 | 7  | 73,508,868  | 6.28E-06 | 0.217 | 0.206 |          |       |     | <i>LIMK1</i>    | Body    |
| cg10534938 | 5  | 1,868,639   | 3.74E-05 | 0.217 | 0.215 |          |       |     |                 |         |
| cg13736514 | 6  | 26,305,472  | 0.000224 | 0.217 | 0.223 |          |       |     |                 |         |
| cg18554976 | 19 | 35,629,356  | 1.19E-07 | 0.217 | 0.181 |          |       |     | <i>FXYP1</i>    | TSS1500 |
| cg19131647 | 17 | 27,397,005  | 0.001353 | 0.217 | 0.146 |          |       |     |                 |         |
| cg07464674 | 17 | 6,358,363   | 1.16E-10 | 0.217 | 0.202 |          |       |     | <i>PITPNM3</i>  | 3'UTR   |
| cg12143499 | 12 | 27,615,389  | 0.006382 | 0.217 | 0.196 |          |       |     |                 |         |
| cg03670393 | 4  | 81,128,690  | 1.06E-11 | 0.217 | 0.206 |          |       |     |                 |         |
| cg04425920 | 10 | 50,604,518  | 0.03651  | 0.217 | 0.298 |          |       |     |                 |         |
| cg03216043 | 19 | 10,928,639  | 8.6E-08  | 0.217 | 0.218 |          |       |     | <i>DNM2</i>     | Body    |
| cg10722799 | 21 | 36,041,699  | 2.03E-05 | 0.217 | 0.210 | 3.48E-07 | 0.072 |     | <i>CLIC6</i>    | 1stExon |
| cg13727629 | 1  | 2,232,469   | 3.39E-05 | 0.217 | 0.204 |          |       |     | <i>SKI</i>      | Body    |
| cg14261840 | 3  | 62,360,417  | 0.034745 | 0.217 | 0.225 |          |       |     | <i>FEZF2</i>    | TSS1500 |
| cg14447077 | 9  | 79,920,904  | 7.33E-09 | 0.217 | 0.205 |          |       |     | <i>VPS13A</i>   | Body    |
| cg17430228 | 11 | 353,919     | 7.21E-11 | 0.217 | 0.205 |          |       |     |                 |         |

|            |    |             |          |       |       |  |  |  |                  |         |
|------------|----|-------------|----------|-------|-------|--|--|--|------------------|---------|
| cg08550353 | 6  | 134,497,627 | 2.18E-11 | 0.217 | 0.233 |  |  |  | <i>SGK1</i>      | TSS1500 |
| cg18173058 | 12 | 114,838,359 | 0.000148 | 0.217 | 0.259 |  |  |  | <i>TBX5</i>      | Body    |
| cg05550420 | 11 | 6,668,214   | 2.11E-05 | 0.217 | 0.219 |  |  |  | <i>DCHS1</i>     | 5'UTR   |
| cg06993255 | 8  | 145,846,234 | 8.57E-06 | 0.217 | 0.200 |  |  |  |                  |         |
| cg13644528 | 9  | 36,163,544  | 2.76E-08 | 0.217 | 0.218 |  |  |  | <i>GLIPR2</i>    | 3'UTR   |
| cg16691177 | 4  | 165,898,666 | 3.56E-06 | 0.217 | 0.210 |  |  |  | <i>TRIM61</i>    | 5'UTR   |
| cg20219329 | 8  | 1,994,478   | 0.026453 | 0.217 | 0.120 |  |  |  | <i>MYOM2</i>     | 5'UTR   |
| cg01301885 | 10 | 128,258,570 | 3.44E-07 | 0.217 | 0.202 |  |  |  |                  |         |
| cg05945608 | 6  | 42,739,639  | 2.24E-06 | 0.217 | 0.246 |  |  |  |                  |         |
| cg06226630 | 4  | 48,493,420  | 2.78E-05 | 0.217 | 0.218 |  |  |  | <i>ZAR1</i>      | Body    |
| cg02165330 | 11 | 124,542,984 | 4.2E-17  | 0.217 | 0.217 |  |  |  | <i>SIAE</i>      | Body    |
| cg05350268 | 6  | 73,330,112  | 0.006154 | 0.217 | 0.237 |  |  |  | <i>KCNQ5</i>     | TSS1500 |
| cg27549878 | 19 | 38,886,554  | 1.8E-05  | 0.217 | 0.203 |  |  |  | <i>SPRED3</i>    | Body    |
| cg00379648 | 12 | 106,979,451 | 0.023456 | 0.217 | 0.287 |  |  |  | <i>RFX4</i>      | Body    |
| cg07704934 | 11 | 44,332,940  | 0.016118 | 0.217 | 0.268 |  |  |  | <i>ALX4</i>      | TSS1500 |
| cg24310711 | 17 | 70,026,605  | 0.034086 | 0.217 | 0.297 |  |  |  |                  |         |
| cg18925726 | 14 | 23,982,474  | 0.000822 | 0.217 | 0.207 |  |  |  |                  |         |
| cg19365673 | 1  | 99,470,618  | 0.018567 | 0.217 | 0.279 |  |  |  | <i>LPPR5</i>     | TSS200  |
| cg12571570 | 2  | 145,267,984 | 9.35E-08 | 0.217 | 0.186 |  |  |  | <i>ZEB2</i>      | Body    |
| cg17388712 | 7  | 50,889,487  | 0.005829 | 0.217 | 0.187 |  |  |  |                  |         |
| cg07249742 | 3  | 124,570,104 | 4.19E-13 | 0.217 | 0.239 |  |  |  | <i>ITGB5</i>     | Body    |
| cg07731871 | 10 | 18,629,568  | 0.002696 | 0.217 | 0.168 |  |  |  | <i>CACNB2</i>    | Body    |
| cg22344727 | 12 | 81,102,035  | 1.72E-09 | 0.217 | 0.196 |  |  |  | <i>MYF6</i>      | Body    |
| cg05664581 | 3  | 181,428,242 | 1.4E-06  | 0.217 | 0.198 |  |  |  | <i>SOX2OT</i>    | Body    |
| cg19351398 | 7  | 149,472,134 | 7.32E-11 | 0.217 | 0.201 |  |  |  | <i>SSPO</i>      | TSS1500 |
| cg25371036 | 11 | 94,500,749  | 6.09E-10 | 0.217 | 0.185 |  |  |  | <i>AMOTL1</i>    | TSS1500 |
| cg14851325 | 6  | 32,156,100  | 7.41E-23 | 0.217 | 0.217 |  |  |  | <i>PBX2</i>      | Body    |
| cg20767912 | 3  | 158,486,217 | 0.005276 | 0.217 | 0.174 |  |  |  |                  |         |
| cg11043815 | 12 | 103,358,817 | 4.61E-05 | 0.217 | 0.188 |  |  |  |                  |         |
| cg12278467 | 5  | 87,971,573  | 0.011496 | 0.217 | 0.221 |  |  |  | <i>LOC645323</i> | Body    |
| cg18034295 | 22 | 42,475,135  | 4.61E-05 | 0.217 | 0.194 |  |  |  | <i>C22orf32</i>  | TSS1500 |
| cg19944656 | 17 | 76,876,040  | 2.08E-06 | 0.217 | 0.210 |  |  |  | <i>TIMP2</i>     | Body    |
| cg04146573 | 11 | 69,970,618  | 4.93E-07 | 0.217 | 0.205 |  |  |  | <i>ANO1</i>      | Body    |
| cg05459609 | 16 | 4,689,950   | 7.12E-19 | 0.217 | 0.188 |  |  |  | <i>MGRN1</i>     | Body    |

|            |    |             |          |       |       |          |       |  |                 |         |
|------------|----|-------------|----------|-------|-------|----------|-------|--|-----------------|---------|
| cg27626620 | 6  | 167,171,727 | 0.002051 | 0.217 | 0.227 |          |       |  | <i>RPS6KA2</i>  | Body    |
| cg08778851 | 17 | 29,888,936  | 0.000135 | 0.217 | 0.185 |          |       |  |                 |         |
| cg11689625 | 4  | 154,386,689 | 0.029095 | 0.217 | 0.160 |          |       |  | <i>KIAA0922</i> | TSS1500 |
| cg03109101 | 10 | 119,305,095 | 8.9E-05  | 0.216 | 0.220 |          |       |  | <i>EMX2</i>     | Body    |
| cg06531741 | 11 | 113,775,450 | 5.76E-17 | 0.216 | 0.201 | 9.81E-26 | 0.177 |  | <i>HTR3B</i>    | TSS200  |
| cg19503963 | 17 | 2,085,005   | 3.78E-10 | 0.216 | 0.203 |          |       |  | <i>SMG6</i>     | Body    |
| cg09834465 | 1  | 35,586,503  | 3.12E-05 | 0.216 | 0.217 |          |       |  |                 |         |
| cg22105158 | 19 | 3,480,672   | 1.09E-05 | 0.216 | 0.210 |          |       |  | <i>C19orf77</i> | TSS200  |
| cg27193080 | 3  | 129,160,612 | 1.32E-11 | 0.216 | 0.238 |          |       |  | <i>IFT122</i>   | Body    |
| cg10045881 | 1  | 111,770,291 | 6.61E-05 | 0.216 | 0.192 | 7.56E-14 | 0.157 |  | <i>CHI3L2</i>   | 1stExon |
| cg12990116 | 6  | 34,433,392  | 0.007179 | 0.216 | 0.155 |          |       |  | <i>PACIN1</i>   | TSS1500 |
| cg15351214 | 14 | 71,277,192  | 1.45E-11 | 0.216 | 0.163 |          |       |  | <i>MAP3K9</i>   | TSS1500 |
| cg04139449 | 6  | 45,631,407  | 1.33E-05 | 0.216 | 0.223 |          |       |  |                 |         |
| cg08419873 | 13 | 27,296,010  | 0.017093 | 0.216 | 0.188 |          |       |  |                 |         |
| cg16683060 | 13 | 99,974,673  | 1.44E-05 | 0.216 | 0.211 |          |       |  | <i>UBAC2</i>    | Body    |
| cg11036041 | 4  | 41,365,307  | 0.01817  | 0.216 | 0.269 |          |       |  | <i>LIMCH1</i>   | Body    |
| cg24827626 | 21 | 46,169,242  | 1.2E-14  | 0.216 | 0.190 |          |       |  |                 |         |
| cg03276479 | 8  | 97,507,958  | 0.002736 | 0.216 | 0.184 |          |       |  | <i>SDC2</i>     | Body    |
| cg05456713 | 19 | 2,513,356   | 2.52E-07 | 0.216 | 0.170 |          |       |  | <i>GNG7</i>     | 3'UTR   |
| cg10606834 | 17 | 59,532,197  | 5.8E-05  | 0.216 | 0.225 |          |       |  |                 |         |
| cg13202751 | 5  | 1,446,443   | 2.47E-05 | 0.216 | 0.174 | 6.65E-26 | 0.204 |  | <i>SLC6A3</i>   | TSS1500 |
| cg01271812 | 2  | 66,671,478  | 6.17E-05 | 0.216 | 0.208 |          |       |  | <i>MEIS1</i>    | Body    |
| cg09368485 | 6  | 29,974,022  | 6.22E-07 | 0.216 | 0.204 |          |       |  | <i>HLA-J</i>    | Body    |
| cg12369353 | 13 | 36,728,963  | 0.0014   | 0.216 | 0.188 |          |       |  |                 |         |
| cg26143752 | 2  | 27,806,326  | 0.000698 | 0.216 | 0.219 |          |       |  | <i>ZNF512</i>   | Body    |
| cg24901662 | 10 | 34,977,342  | 1.25E-11 | 0.216 | 0.185 |          |       |  | <i>PARD3</i>    | Body    |
| cg27247697 | 2  | 87,018,054  | 0.000287 | 0.216 | 0.218 |          |       |  | <i>CD8A</i>     | 5'UTR   |
| cg07155422 | 1  | 12,114,402  | 1.91E-10 | 0.216 | 0.217 |          |       |  |                 |         |
| cg11878182 | 8  | 102,217,722 | 2.53E-17 | 0.216 | 0.217 |          |       |  | <i>ZNF706</i>   | 5'UTR   |
| cg02551980 | 5  | 112,628,419 | 0.00033  | 0.216 | 0.236 |          |       |  | <i>MCC</i>      | Body    |
| cg03377610 | 2  | 45,164,723  | 1.34E-05 | 0.216 | 0.210 |          |       |  |                 |         |
| cg23400512 | 14 | 85,996,315  | 0.029219 | 0.216 | 0.242 |          |       |  | <i>FLRT2</i>    | TSS200  |
| cg02577433 | 10 | 102,887,035 | 0.016375 | 0.216 | 0.257 |          |       |  | <i>TLX1NB</i>   | 5'UTR   |
| cg16797421 | 6  | 147,428,486 | 8.62E-05 | 0.216 | 0.269 |          |       |  |                 |         |

|            |    |             |          |       |       |          |       |     |                 |         |
|------------|----|-------------|----------|-------|-------|----------|-------|-----|-----------------|---------|
| cg22241820 | 15 | 68,122,574  | 6.96E-06 | 0.216 | 0.209 |          |       |     | <i>LBXCOR1</i>  | Body    |
| cg00721572 | 1  | 147,775,609 | 0.013184 | 0.216 | 0.267 |          |       |     |                 |         |
| cg08204129 | 3  | 145,852,537 | 2.09E-14 | 0.216 | 0.194 |          |       |     | <i>PLOD2</i>    | Body    |
| cg23352597 | X  | 46,435,742  | 0.000317 | 0.216 | 0.189 |          |       |     | <i>CHST7</i>    | 3'UTR   |
| cg01581222 | 19 | 10,958,952  | 6.48E-08 | 0.216 | 0.192 |          |       |     | <i>C19orf38</i> | TSS200  |
| cg18735451 | 7  | 28,905,872  | 0.011208 | 0.216 | 0.139 |          |       |     |                 |         |
| cg26505691 | 16 | 27,461,333  | 0.015938 | 0.216 | 0.191 |          |       |     | <i>IL21R</i>    | 3'UTR   |
| cg05471090 | 18 | 71,959,795  | 0.003456 | 0.216 | 0.152 |          |       |     | <i>CYB5A</i>    | TSS1500 |
| cg13606889 | 11 | 121,335,457 | 4.38E-05 | 0.216 | 0.202 |          |       |     | <i>SORL1</i>    | Body    |
| cg17159161 | 6  | 31,323,760  | 0.003572 | 0.216 | 0.142 |          |       |     | <i>HLA-B</i>    | Body    |
| cg24159514 | 19 | 11,785,248  | 1.27E-10 | 0.216 | 0.207 |          |       |     | <i>ZNF833</i>   | Body    |
| cg14871932 | 7  | 44,185,323  | 7.73E-09 | 0.216 | 0.218 |          |       |     | <i>GCK</i>      | Body    |
| cg01575601 | 11 | 130,398,900 | 7.25E-06 | 0.216 | 0.221 |          |       |     |                 |         |
| cg07111861 | 15 | 57,737,942  | 2.87E-14 | 0.216 | 0.197 |          |       |     | <i>CGNL1</i>    | Body    |
| cg18180569 | 1  | 44,883,362  | 0.032892 | 0.216 | 0.212 |          |       |     | <i>RNF220</i>   | Body    |
| cg18564989 | 1  | 226,411,057 | 0.012343 | 0.216 | 0.269 |          |       |     | <i>MIXL1</i>    | TSS1500 |
| cg26751356 | 13 | 112,712,635 | 0.002454 | 0.216 | 0.253 |          |       |     |                 |         |
| cg26825412 | 20 | 62,681,428  | 1.25E-13 | 0.216 | 0.206 | 9.45E-22 | 0.121 |     | <i>SOX18</i>    | TSS1500 |
| cg23174616 | 5  | 145,713,698 | 0.000698 | 0.216 | 0.182 |          |       |     |                 |         |
| cg10002668 | 7  | 107,665,708 | 1.42E-05 | 0.216 | 0.206 |          |       |     | <i>LAMB4</i>    | Body    |
| cg11260097 | 7  | 121,940,647 | 0.000224 | 0.216 | 0.200 |          |       |     |                 |         |
| cg17320136 | 5  | 10,567,905  | 6.02E-10 | 0.216 | 0.213 |          |       |     | <i>ANKRD33B</i> | Body    |
| cg22086566 | 7  | 3,989,097   | 2.57E-09 | 0.216 | 0.220 |          |       |     | <i>SDK1</i>     | Body    |
| cg24161925 | 6  | 139,116,947 | 0.000607 | 0.216 | 0.227 |          |       |     |                 |         |
| cg05360577 | 11 | 17,717,629  | 0.001727 | 0.216 | 0.200 |          |       |     |                 |         |
| cg11537406 | 11 | 124,932,624 | 1.87E-12 | 0.216 | 0.201 |          |       |     | <i>SLC37A2</i>  | TSS1500 |
| cg17298181 | 3  | 187,456,175 | 0.020429 | 0.216 | 0.271 |          |       |     | <i>BCL6</i>     | 5'UTR   |
| cg01970040 | 17 | 27,396,961  | 7.09E-12 | 0.216 | 0.206 |          |       |     |                 |         |
| cg20755170 | 5  | 145,720,024 | 0.033226 | 0.216 | 0.089 |          |       |     | <i>POU4F3</i>   | 3'UTR   |
| cg12868067 | 12 | 128,752,246 | 0.038551 | 0.216 | 0.274 |          |       | Yes | <i>TMEM132C</i> | Body    |
| cg01874730 | 16 | 57,406,425  | 3.25E-12 | 0.216 | 0.215 |          |       |     | <i>CX3CL1</i>   | 1stExon |
| cg13728308 | 14 | 34,532,891  | 1.75E-08 | 0.216 | 0.189 |          |       |     |                 |         |
| cg04871131 | 7  | 94,954,202  | 5.06E-13 | 0.216 | 0.216 |          |       |     | <i>PON1</i>     | TSS1500 |
| cg11839020 | 1  | 90,309,998  | 2.3E-10  | 0.216 | 0.211 |          |       |     | <i>LRR8D</i>    | 5'UTR   |

|            |    |             |          |       |       |           |       |  |                |         |
|------------|----|-------------|----------|-------|-------|-----------|-------|--|----------------|---------|
| cg13334949 | 20 | 44,471,068  | 7.6E-07  | 0.216 | 0.199 |           |       |  | <i>SNX21</i>   | 3'UTR   |
| cg13748092 | 15 | 58,024,200  | 1.61E-16 | 0.216 | 0.212 |           |       |  |                |         |
| cg19453938 | 7  | 73,265,946  | 0.007494 | 0.216 | 0.255 |           |       |  |                |         |
| cg10044470 | 14 | 104,866,284 | 7.68E-06 | 0.216 | 0.163 |           |       |  |                |         |
| cg18433009 | 10 | 72,013,286  | 6.19E-12 | 0.216 | 0.199 |           |       |  |                |         |
| cg20319604 | 2  | 44,428,936  | 3.04E-09 | 0.216 | 0.207 |           |       |  | <i>PPM1B</i>   | Body    |
| cg09063936 | 2  | 74,408,977  | 6.91E-05 | 0.216 | 0.210 |           |       |  |                |         |
| cg16158045 | X  | 2,748,039   | 1.67E-08 | 0.216 | 0.217 |           |       |  | <i>GYG2</i>    | 5'UTR   |
| cg22445940 | 20 | 57,224,919  | 0.003271 | 0.216 | 0.196 |           |       |  | <i>STX16</i>   | TSS1500 |
| cg22698028 | 5  | 400,494     | 0.009304 | 0.216 | 0.263 |           |       |  | <i>AHRR</i>    | Body    |
| cg23662469 | X  | 54,472,372  | 4.16E-06 | 0.216 | 0.219 |           |       |  | <i>FGD1</i>    | 3'UTR   |
| cg03625287 | 13 | 24,121,359  | 0.022726 | 0.216 | 0.191 |           |       |  |                |         |
| cg25583491 | 5  | 94,955,880  | 0.010503 | 0.216 | 0.146 |           |       |  | <i>GPR150</i>  | TSS200  |
| cg02716792 | 16 | 81,480,551  | 0.01485  | 0.216 | 0.227 |           |       |  | <i>CMIP</i>    | Body    |
| cg11139102 | 7  | 100,073,936 | 5.82E-06 | 0.216 | 0.230 |           |       |  | <i>TSC22D4</i> | Body    |
| cg25447894 | 22 | 41,957,443  | 1.78E-06 | 0.216 | 0.245 |           |       |  | <i>CSDC2</i>   | 5'UTR   |
| cg07797660 | 1  | 3,239,139   | 1.46E-13 | 0.216 | 0.178 |           |       |  | <i>PRDM16</i>  | Body    |
| cg15812139 | 6  | 168,996,082 | 9.21E-08 | 0.216 | 0.211 |           |       |  | <i>SMOC2</i>   | Body    |
| cg01285706 | 4  | 81,953,041  | 0.024364 | 0.216 | 0.161 |           |       |  | <i>BMP3</i>    | Body    |
| cg16401270 | 1  | 32,404,469  | 0.010228 | 0.216 | 0.152 |           |       |  | <i>PTP4A2</i>  | TSS1500 |
| cg21177426 | 15 | 37,386,586  | 0.001337 | 0.216 | 0.242 |           |       |  | <i>MEIS2</i>   | Body    |
| cg26523005 | 3  | 42,947,267  | 0.001669 | 0.216 | 0.142 | 0.0000533 | 0.078 |  | <i>ZNF662</i>  | TSS1500 |
| cg26926076 | 6  | 129,204,510 | 0.034558 | 0.216 | 0.234 |           |       |  | <i>LAMA2</i>   | Body    |
| cg19862242 | 6  | 138,200,334 | 4.33E-10 | 0.216 | 0.225 |           |       |  | <i>TNFAIP3</i> | Body    |
| cg26034934 | 2  | 20,420,746  | 7.97E-06 | 0.216 | 0.168 |           |       |  | <i>SDC1</i>    | Body    |
| cg09993814 | 20 | 36,154,222  | 2.02E-08 | 0.216 | 0.217 |           |       |  | <i>BLCAP</i>   | 5'UTR   |
| cg15110101 | 11 | 61,717,334  | 0.021328 | 0.216 | 0.206 |           |       |  | <i>BEST1</i>   | TSS200  |
| cg08944961 | 12 | 111,537,195 | 8.21E-09 | 0.216 | 0.196 |           |       |  | <i>CUX2</i>    | Body    |
| cg22604013 | 3  | 53,173,997  | 1.52E-05 | 0.216 | 0.202 |           |       |  |                |         |
| cg17147820 | 11 | 61,322,255  | 0.000344 | 0.216 | 0.228 |           |       |  | <i>SYT7</i>    | Body    |
| cg25177692 | X  | 129,193,893 | 3.17E-05 | 0.216 | 0.195 |           |       |  |                |         |
| cg13419390 | 2  | 131,512,651 | 0.003238 | 0.216 | 0.254 |           |       |  | <i>FAM123C</i> | TSS1500 |
| cg22305293 | 3  | 93,851,734  | 0.023654 | 0.216 | 0.179 |           |       |  |                |         |
| cg15782228 | 20 | 60,932,415  | 8.45E-09 | 0.216 | 0.219 |           |       |  | <i>LAMA5</i>   | Body    |

|            |    |             |          |       |       |  |  |  |                  |         |
|------------|----|-------------|----------|-------|-------|--|--|--|------------------|---------|
| cg20293942 | 13 | 50,701,256  | 1.42E-06 | 0.216 | 0.193 |  |  |  |                  |         |
| cg25090972 | 7  | 156,797,988 | 0.033556 | 0.216 | 0.243 |  |  |  | <i>MXN1</i>      | 3'UTR   |
| cg26069093 | 12 | 122,048,642 | 1.33E-05 | 0.216 | 0.218 |  |  |  |                  |         |
| cg05896902 | 15 | 45,671,018  | 0.001248 | 0.216 | 0.184 |  |  |  | <i>LOC145663</i> | Body    |
| cg20794824 | 3  | 170,138,205 | 3.96E-07 | 0.216 | 0.189 |  |  |  | <i>CLDN11</i>    | Body    |
| cg25741487 | 3  | 62,363,076  | 0.019623 | 0.216 | 0.205 |  |  |  |                  |         |
| cg01074584 | 8  | 41,168,072  | 1.91E-05 | 0.216 | 0.195 |  |  |  | <i>SFRP1</i>     | TSS1500 |
| cg09931783 | 12 | 123,469,669 | 1.44E-10 | 0.216 | 0.203 |  |  |  | <i>PITPNM2</i>   | 3'UTR   |
| cg19907796 | 2  | 71,134,694  | 0.000647 | 0.216 | 0.217 |  |  |  | <i>VAX2</i>      | Body    |
| cg24834823 | 8  | 38,386,476  | 1.75E-12 | 0.216 | 0.205 |  |  |  | <i>C8orf86</i>   | TSS1500 |
| cg14517133 | 6  | 42,664,420  | 6.46E-10 | 0.216 | 0.190 |  |  |  | <i>PRPH2</i>     | 3'UTR   |
| cg19907305 | 19 | 18,902,117  | 0.000788 | 0.216 | 0.172 |  |  |  | <i>COMP</i>      | TSS200  |
| cg00935216 | 7  | 157,461,368 | 0.000995 | 0.216 | 0.156 |  |  |  | <i>PTPRN2</i>    | Body    |
| cg09845489 | 7  | 157,667,853 | 6.88E-11 | 0.216 | 0.185 |  |  |  | <i>PTPRN2</i>    | Body    |
| cg09866565 | 3  | 137,844,436 | 6.97E-07 | 0.216 | 0.228 |  |  |  | <i>A4GNT</i>     | Body    |
| cg12009023 | 4  | 148,402,128 | 0.032503 | 0.216 | 0.175 |  |  |  | <i>EDNRA</i>     | Body    |
| cg22782017 | 6  | 168,785,895 | 0.001075 | 0.216 | 0.185 |  |  |  |                  |         |
| cg00123055 | 8  | 55,370,951  | 0.002235 | 0.216 | 0.276 |  |  |  | <i>SOX17</i>     | 1stExon |
| cg09059267 | 2  | 220,223,082 | 1.17E-14 | 0.216 | 0.202 |  |  |  |                  |         |
| cg15060599 | 3  | 13,974,467  | 0.015932 | 0.216 | 0.172 |  |  |  |                  |         |
| cg16368146 | 6  | 29,943,425  | 6.68E-09 | 0.216 | 0.212 |  |  |  | <i>HCG9</i>      | Body    |
| cg20864568 | 17 | 43,391,599  | 2.25E-06 | 0.216 | 0.188 |  |  |  | <i>MAP3K14</i>   | 5'UTR   |
| cg21808635 | 7  | 55,225,133  | 5.46E-19 | 0.216 | 0.197 |  |  |  | <i>EGFR</i>      | Body    |
| cg06139749 | 7  | 135,480,516 | 0.00027  | 0.216 | 0.246 |  |  |  |                  |         |
| cg23213887 | 5  | 127,872,767 | 7.82E-06 | 0.216 | 0.211 |  |  |  | <i>FBN2</i>      | Body    |
| cg00666105 | 3  | 181,428,377 | 3.08E-06 | 0.216 | 0.199 |  |  |  | <i>SOX20T</i>    | Body    |
| cg12271981 | 13 | 88,326,752  | 0.017668 | 0.216 | 0.263 |  |  |  | <i>SLITRK5</i>   | 5'UTR   |
| cg18049638 | 6  | 28,733,695  | 0.04944  | 0.216 | 0.099 |  |  |  |                  |         |
| cg27411712 | 12 | 30,976,016  | 0.000235 | 0.216 | 0.193 |  |  |  |                  |         |
| cg08045599 | Y  | 7,140,572   | 2.36E-08 | 0.216 | 0.227 |  |  |  | <i>PRKY</i>      | TSS1500 |
| cg08423562 | 1  | 38,466,544  | 0.003007 | 0.216 | 0.260 |  |  |  | <i>FHL3</i>      | 5'UTR   |
| cg13931134 | 10 | 33,671,135  | 7.05E-07 | 0.216 | 0.218 |  |  |  |                  |         |
| cg24880701 | 15 | 68,121,563  | 0.000265 | 0.216 | 0.180 |  |  |  | <i>LBXCOR1</i>   | Body    |
| cg26512045 | 6  | 31,111,158  | 1.74E-16 | 0.216 | 0.213 |  |  |  | <i>CCHCR1</i>    | Body    |



|            |    |             |          |       |       |          |       |     |                  |         |
|------------|----|-------------|----------|-------|-------|----------|-------|-----|------------------|---------|
| cg27415425 | 8  | 95,084,766  | 2.85E-05 | 0.216 | 0.246 |          |       |     |                  |         |
| cg01960748 | 1  | 24,522,592  | 6.23E-06 | 0.216 | 0.200 |          |       |     |                  |         |
| cg08911048 | 5  | 139,168,029 | 1.17E-05 | 0.216 | 0.206 |          |       | Yes |                  |         |
| cg11823496 | 8  | 23,553,798  | 8.53E-05 | 0.216 | 0.185 |          |       |     |                  |         |
| cg13939055 | 1  | 244,094,869 | 1.4E-16  | 0.216 | 0.199 |          |       |     |                  |         |
| cg18618429 | 3  | 122,043,865 | 4.89E-05 | 0.216 | 0.240 |          |       |     | <i>CSTA</i>      | TSS200  |
| cg18694169 | 6  | 28,227,079  | 3.17E-06 | 0.216 | 0.208 |          |       |     | <i>NKAPL</i>     | TSS200  |
| cg26372400 | 12 | 52,300,922  | 0.000888 | 0.216 | 0.219 |          |       |     | <i>ACVRL1</i>    | TSS1500 |
| cg01864564 | 1  | 152,488,269 | 0.033966 | 0.216 | 0.197 |          |       |     | <i>CRCT1</i>     | 3'UTR   |
| cg13956167 | 2  | 23,792,747  | 9.8E-10  | 0.216 | 0.210 |          |       |     | <i>KLHL29</i>    | Body    |
| cg01879039 | 1  | 52,456,656  | 3.31E-10 | 0.216 | 0.189 |          |       |     | <i>RAB3B</i>     | TSS1500 |
| cg01989521 | 14 | 103,522,012 | 1.2E-12  | 0.216 | 0.198 |          |       |     | <i>CDC42BPB</i>  | Body    |
| cg08164191 | 14 | 65,623,632  | 1.05E-07 | 0.216 | 0.205 |          |       |     |                  |         |
| cg11700824 | 10 | 88,730,823  | 0.03138  | 0.216 | 0.196 |          |       |     | <i>AGAP11</i>    | 5'UTR   |
| cg01134643 | 10 | 5,406,948   | 0.015937 | 0.216 | 0.164 |          |       |     | <i>UCN3</i>      | TSS200  |
| cg19778015 | 3  | 11,625,154  | 3.38E-17 | 0.216 | 0.214 |          |       |     | <i>VGLL4</i>     | Body    |
| cg23991358 | 1  | 114,618,759 | 8.83E-07 | 0.216 | 0.176 |          |       |     |                  |         |
| cg08949339 | 12 | 30,949,073  | 0.036628 | 0.216 | 0.141 |          |       |     |                  |         |
| cg06573604 | 2  | 160,760,825 | 2.47E-05 | 0.216 | 0.212 |          |       |     | <i>LY75</i>      | Body    |
| cg17544177 | 10 | 103,589,245 | 3.76E-12 | 0.216 | 0.193 |          |       |     | <i>KCNIP2</i>    | Body    |
| cg08688659 | 11 | 35,249,965  | 2.05E-11 | 0.216 | 0.207 |          |       |     | <i>CD44</i>      | Body    |
| cg01870826 | 7  | 5,111,875   | 0.045526 | 0.216 | 0.215 | 1.86E-09 | 0.183 |     | <i>LOC389458</i> | Body    |
| cg02139338 | 10 | 134,108,333 | 1.6E-08  | 0.216 | 0.223 |          |       |     | <i>STK32C</i>    | Body    |
| cg04566826 | 19 | 34,289,872  | 2.83E-17 | 0.216 | 0.211 |          |       |     | <i>KCTD15</i>    | 5'UTR   |
| cg14644378 | 9  | 34,988,588  | 0.000972 | 0.216 | 0.236 |          |       |     | <i>DNAJB5</i>    | TSS1500 |
| cg00698413 | 2  | 225,266,656 | 0.005081 | 0.216 | 0.228 |          |       |     | <i>FAM124B</i>   | 5'UTR   |
| cg21691166 | 18 | 43,355,681  | 3.11E-05 | 0.216 | 0.183 |          |       |     |                  |         |
| cg01079860 | 2  | 219,828,633 | 0.010047 | 0.216 | 0.159 |          |       |     |                  |         |
| cg03779078 | 7  | 45,554,419  | 0.02907  | 0.216 | 0.289 |          |       |     |                  |         |
| cg07525682 | 11 | 63,729,080  | 0.000211 | 0.216 | 0.174 |          |       |     |                  |         |
| cg14474777 | 9  | 95,889,381  | 2.49E-07 | 0.216 | 0.212 |          |       |     | <i>NINJ1</i>     | Body    |
| cg15487620 | 1  | 160,084,833 | 7.33E-06 | 0.216 | 0.222 |          |       |     | <i>ATP1A2</i>    | TSS1500 |
| cg26118943 | 5  | 53,816,563  | 5.95E-08 | 0.216 | 0.187 |          |       |     | <i>SNX18</i>     | 1stExon |
| cg08114317 | 1  | 1,935,535   | 1.44E-05 | 0.216 | 0.199 |          |       |     | <i>KIAA1751</i>  | TSS1500 |

|            |    |             |          |       |       |          |       |  |                  |         |
|------------|----|-------------|----------|-------|-------|----------|-------|--|------------------|---------|
| cg15665928 | 3  | 138,658,345 | 0.001113 | 0.216 | 0.273 |          |       |  |                  |         |
| cg18555698 | 11 | 12,699,172  | 5.1E-11  | 0.216 | 0.214 |          |       |  | <i>TEAD1</i>     | 5'UTR   |
| cg19987356 | 17 | 40,823,930  | 9.1E-07  | 0.216 | 0.213 |          |       |  | <i>PLEKHH3</i>   | Body    |
| cg07178969 | 11 | 59,323,439  | 0.007324 | 0.216 | 0.217 |          |       |  |                  |         |
| cg08729178 | 15 | 93,633,249  | 0.000284 | 0.216 | 0.173 |          |       |  | <i>RGMA</i>      | TSS1500 |
| cg25839439 | 1  | 19,764,480  | 1.47E-08 | 0.216 | 0.222 |          |       |  | <i>CAPZB</i>     | Body    |
| cg12737497 | 18 | 56,530,420  | 3.07E-05 | 0.216 | 0.127 |          |       |  | <i>ZNF532</i>    | 5'UTR   |
| cg05377839 | 3  | 61,833,671  | 2.36E-08 | 0.216 | 0.227 |          |       |  | <i>PTPRG</i>     | Body    |
| cg20353227 | 15 | 67,430,416  | 5.24E-13 | 0.216 | 0.205 |          |       |  | <i>SMAD3</i>     | Body    |
| cg05389174 | 22 | 20,192,371  | 9.38E-13 | 0.216 | 0.228 |          |       |  | <i>LOC150197</i> | TSS1500 |
| cg13238479 | 13 | 36,049,673  | 0.013029 | 0.216 | 0.195 |          |       |  | <i>MAB21L1</i>   | 1stExon |
| cg23136139 | 10 | 43,697,918  | 4.09E-26 | 0.216 | 0.214 |          |       |  | <i>RASGEF1A</i>  | Body    |
| cg25313172 | 12 | 52,627,272  | 1.31E-05 | 0.216 | 0.206 |          |       |  | <i>KRT7</i>      | 1stExon |
| cg04617948 | 10 | 129,535,138 | 0.000264 | 0.216 | 0.199 |          |       |  | <i>FOXI2</i>     | TSS1500 |
| cg07053014 | 6  | 44,187,132  | 0.043077 | 0.216 | 0.143 |          |       |  | <i>SLC29A1</i>   | TSS200  |
| cg26485937 | 5  | 140,802,432 | 0.000108 | 0.216 | 0.242 |          |       |  | <i>PCDHGA4</i>   | Body    |
| cg04386144 | 6  | 43,970,475  | 0.046994 | 0.216 | 0.189 |          |       |  | <i>C6orf223</i>  | Body    |
| cg03574306 | 16 | 85,470,662  | 0.001436 | 0.216 | 0.168 |          |       |  |                  |         |
| cg07793808 | 12 | 122,019,006 | 0.022499 | 0.216 | 0.194 |          |       |  | <i>KDM2B</i>     | TSS200  |
| cg09712756 | 6  | 125,276,550 | 2.17E-15 | 0.216 | 0.205 |          |       |  | <i>STL</i>       | Body    |
| cg27624471 | 18 | 77,280,171  | 0.000828 | 0.216 | 0.203 |          |       |  | <i>NFATC1</i>    | Body    |
| cg00997251 | 5  | 142,444,988 | 1.02E-07 | 0.216 | 0.210 |          |       |  | <i>ARHGAP26</i>  | Body    |
| cg02919422 | 8  | 55,370,544  | 0.000994 | 0.216 | 0.253 | 1.26E-26 | 0.229 |  | <i>SOX17</i>     | 5'UTR   |
| cg06600725 | 12 | 48,690,915  | 0.004977 | 0.216 | 0.229 |          |       |  |                  |         |
| cg08196968 | 19 | 38,746,749  | 0.010002 | 0.216 | 0.180 |          |       |  | <i>PPP1R14A</i>  | Body    |
| cg10289074 | 14 | 24,682,916  | 0.000413 | 0.216 | 0.146 |          |       |  | <i>CHMP4A</i>    | 1stExon |
| cg12428326 | 20 | 39,807,896  | 0.000271 | 0.216 | 0.220 |          |       |  | <i>ZHX3</i>      | 3'UTR   |
| cg13702222 | 3  | 152,017,240 | 0.002047 | 0.216 | 0.186 |          |       |  | <i>MBNL1</i>     | 1stExon |
| cg24378227 | 6  | 1,396,771   | 5.85E-06 | 0.216 | 0.191 |          |       |  |                  |         |
| cg24823222 | 10 | 30,247,300  | 5.88E-21 | 0.216 | 0.225 |          |       |  |                  |         |
| cg26036018 | 1  | 65,641,680  | 0.000169 | 0.216 | 0.257 |          |       |  | <i>AK3L1</i>     | Body    |
| cg26389053 | 11 | 67,815,280  | 9.22E-09 | 0.216 | 0.218 |          |       |  | <i>TCIRG1</i>    | Body    |
| cg01166145 | 4  | 55,093,692  | 0.000148 | 0.216 | 0.208 |          |       |  |                  |         |
| cg02812767 | 15 | 74,218,468  | 4.74E-12 | 0.216 | 0.195 |          |       |  | <i>LOXL1</i>     | TSS1500 |

|            |    |             |          |       |       |          |       |     |                 |         |
|------------|----|-------------|----------|-------|-------|----------|-------|-----|-----------------|---------|
| cg15113766 | 1  | 155,290,418 | 3.05E-05 | 0.216 | 0.167 |          |       |     | <i>RUSC1</i>    | TSS1500 |
| cg13656878 | 9  | 119,048,807 | 4.08E-06 | 0.216 | 0.196 |          |       |     | <i>PAPPA</i>    | Body    |
| cg08405119 | 4  | 53,728,999  | 2.11E-07 | 0.216 | 0.209 |          |       |     | <i>RASL11B</i>  | Body    |
| cg08621611 | 16 | 10,277,254  | 0.016248 | 0.216 | 0.258 |          |       |     | <i>GRIN2A</i>   | TSS1500 |
| cg13974394 | 5  | 1,882,188   | 2.63E-07 | 0.216 | 0.235 |          |       |     | <i>IRX4</i>     | Body    |
| cg21863888 | 6  | 31,127,173  | 8.77E-05 | 0.216 | 0.225 |          |       |     | <i>TCF19</i>    | 5'UTR   |
| cg02488338 | 5  | 63,798,214  | 6.49E-05 | 0.216 | 0.197 |          |       |     |                 |         |
| cg11205173 | 4  | 1,775,077   | 8.26E-10 | 0.216 | 0.219 |          |       |     |                 |         |
| cg13367647 | 1  | 155,213,714 | 0.003722 | 0.216 | 0.211 |          |       |     | <i>GBA</i>      | 5'UTR   |
| cg01211283 | 8  | 22,735,276  | 0.029711 | 0.216 | 0.036 |          |       |     | <i>PEBP4</i>    | Body    |
| cg05820959 | 7  | 151,248,135 | 4.84E-10 | 0.216 | 0.198 |          |       |     |                 |         |
| cg13304350 | 17 | 43,084,426  | 0.005274 | 0.216 | 0.292 |          |       |     |                 |         |
| cg00184376 | 13 | 28,499,045  | 0.000902 | 0.215 | 0.157 |          |       |     | <i>PDX1</i>     | 3'UTR   |
| cg00624418 | 5  | 1,282,357   | 0.045418 | 0.215 | 0.062 |          |       |     | <i>TERT</i>     | Body    |
| cg07084163 | 5  | 36,066,783  | 0.000114 | 0.215 | 0.193 | 1.46E-16 | 0.175 |     | <i>UGT3A2</i>   | Body    |
| cg11960377 | 11 | 3,167,827   | 8.54E-28 | 0.215 | 0.216 |          |       |     | <i>OSBPL5</i>   | 5'UTR   |
| cg25775322 | 4  | 154,710,373 | 0.018515 | 0.215 | 0.285 |          |       |     | <i>SFRP2</i>    | TSS200  |
| cg07042014 | 14 | 24,783,620  | 0.002814 | 0.215 | 0.203 |          |       |     | <i>LTB4R</i>    | 5'UTR   |
| cg07483989 | 9  | 33,751,159  | 0.000694 | 0.215 | 0.206 |          |       |     | <i>PRSS3</i>    | Body    |
| cg25849196 | 2  | 175,198,280 | 0.013346 | 0.215 | 0.278 |          |       |     |                 |         |
| cg12145349 | 11 | 63,712,934  | 7.96E-17 | 0.215 | 0.212 |          |       |     | <i>NAA40</i>    | Body    |
| cg12896318 | 5  | 173,395,358 | 2.02E-12 | 0.215 | 0.209 |          |       | Yes |                 |         |
| cg14088142 | 5  | 138,923,113 | 0.000309 | 0.215 | 0.186 |          |       |     |                 |         |
| cg00886387 | 13 | 44,729,868  | 8.5E-12  | 0.215 | 0.208 |          |       |     |                 |         |
| cg12473916 | 1  | 154,943,651 | 5.6E-06  | 0.215 | 0.249 |          |       |     | <i>SHC1</i>     | 5'UTR   |
| cg16353350 | 10 | 75,683,980  | 3.85E-08 | 0.215 | 0.209 |          |       |     | <i>C10orf55</i> | TSS1500 |
| cg25732028 | 17 | 46,619,313  | 0.000225 | 0.215 | 0.197 |          |       |     |                 |         |
| cg26385222 | 7  | 150,497,077 | 0.00094  | 0.215 | 0.144 | 9.43E-20 | 0.162 |     | <i>TMEM176B</i> | TSS1500 |
| cg24644902 | 10 | 77,036,275  | 0.044631 | 0.215 | 0.250 |          |       |     |                 |         |
| cg04085447 | 19 | 35,773,328  | 0.001887 | 0.215 | 0.257 |          |       |     | <i>HAMP</i>     | TSS200  |
| cg05021589 | 6  | 6,588,931   | 4.07E-06 | 0.215 | 0.191 |          |       |     | <i>LY86</i>     | TSS200  |
| cg05291966 | 16 | 52,742,008  | 3.99E-06 | 0.215 | 0.184 |          |       |     |                 |         |
| cg00960263 | 5  | 15,501,678  | 0.042662 | 0.215 | 0.137 |          |       |     | <i>FBXL7</i>    | Body    |
| cg00931874 | 13 | 113,274,535 | 3.17E-05 | 0.215 | 0.210 |          |       |     |                 |         |

|            |    |             |          |       |       |          |       |  |                     |         |
|------------|----|-------------|----------|-------|-------|----------|-------|--|---------------------|---------|
| cg05720733 | 16 | 84,829,007  | 7.01E-11 | 0.215 | 0.190 |          |       |  |                     |         |
| cg18147233 | 1  | 970,294     | 2.03E-11 | 0.215 | 0.201 |          |       |  | <i>AGRN</i>         | Body    |
| cg21762589 | 10 | 133,796,476 | 0.000327 | 0.215 | 0.169 | 1.02E-18 | 0.182 |  | <i>BNIP3</i>        | TSS1500 |
| cg25651608 | 3  | 42,073,868  | 0.02413  | 0.215 | 0.063 |          |       |  |                     |         |
| cg00790395 | 10 | 94,822,172  | 0.021563 | 0.215 | 0.161 |          |       |  | <i>CYP26C1</i>      | Body    |
| cg00883311 | 2  | 62,932,096  | 0.008488 | 0.215 | 0.076 |          |       |  | <i>EHBP1</i>        | TSS1500 |
| cg23683800 | 10 | 115,086,103 | 0.006148 | 0.215 | 0.210 |          |       |  |                     |         |
| cg24727114 | 4  | 124,707,571 | 0.000171 | 0.215 | 0.179 |          |       |  | <i>LOC285419</i>    | Body    |
| cg04127044 | 10 | 47,083,355  | 0.000519 | 0.215 | 0.094 |          |       |  | <i>PPYR1</i>        | TSS200  |
| cg07135032 | 1  | 165,322,099 | 8.71E-06 | 0.215 | 0.179 |          |       |  | <i>LMX1A</i>        | Body    |
| cg21708738 | 2  | 42,175,351  | 4.34E-05 | 0.215 | 0.244 |          |       |  |                     |         |
| cg21916479 | 3  | 194,024,145 | 0.002381 | 0.215 | 0.207 |          |       |  | <i>LOC100131551</i> | Body    |
| cg23940612 | 2  | 218,898,788 | 0.000193 | 0.215 | 0.239 |          |       |  |                     |         |
| cg26581714 | 4  | 52,943,247  | 0.003405 | 0.215 | 0.218 |          |       |  | <i>SPATA18</i>      | Body    |
| cg12526091 | 12 | 58,245,042  | 4.33E-08 | 0.215 | 0.205 |          |       |  |                     |         |
| cg19200515 | 6  | 45,609,499  | 0.000657 | 0.215 | 0.170 |          |       |  |                     |         |
| cg23013473 | 17 | 77,881,799  | 1.21E-12 | 0.215 | 0.191 |          |       |  |                     |         |
| cg15118606 | 1  | 14,954,053  | 0.007111 | 0.215 | 0.153 |          |       |  | <i>KIAA1026</i>     | Body    |
| cg20976526 | 8  | 101,118,021 | 2.48E-06 | 0.215 | 0.221 |          |       |  | <i>RGS22</i>        | Body    |
| cg22961747 | 17 | 28,973,565  | 0.000648 | 0.215 | 0.170 |          |       |  |                     |         |
| cg02486145 | 2  | 38,334,178  | 4.15E-07 | 0.215 | 0.211 |          |       |  |                     |         |
| cg02211519 | 11 | 2,407,267   | 2.87E-14 | 0.215 | 0.224 |          |       |  | <i>CD81</i>         | Body    |
| cg13364230 | 1  | 35,258,779  | 0.000188 | 0.215 | 0.224 |          |       |  | <i>GJA4</i>         | 5'UTR   |
| cg17465423 | 12 | 54,784,180  | 5.68E-07 | 0.215 | 0.165 |          |       |  | <i>ZNF385A</i>      | Body    |
| cg05349245 | 4  | 140,201,539 | 8.51E-09 | 0.215 | 0.213 |          |       |  | <i>C4orf49</i>      | TSS200  |
| cg09093210 | 12 | 57,619,199  | 0.003363 | 0.215 | 0.157 |          |       |  | <i>NXPH4</i>        | Body    |
| cg16680438 | 1  | 16,553,549  | 0.002229 | 0.215 | 0.211 |          |       |  |                     |         |
| cg19065177 | 5  | 140,105,648 | 0.022155 | 0.215 | 0.193 |          |       |  | <i>VTRNA1-3</i>     | TSS200  |
| cg23316253 | 10 | 8,076,277   | 0.001808 | 0.215 | 0.254 |          |       |  |                     |         |
| cg23546474 | 2  | 223,163,033 | 2.29E-06 | 0.215 | 0.192 |          |       |  | <i>PAX3</i>         | Body    |
| cg06111454 | 14 | 24,837,836  | 0.026162 | 0.215 | 0.274 | 1.08E-13 | 0.206 |  | <i>NFATC4</i>       | Body    |
| cg18709306 | 2  | 106,431,541 | 1.98E-05 | 0.215 | 0.248 |          |       |  | <i>NCK2</i>         | 5'UTR   |
| cg21926782 | 3  | 49,459,909  | 1.55E-09 | 0.215 | 0.209 |          |       |  | <i>AMT</i>          | Body    |
| cg22262757 | 15 | 86,632,956  | 4.7E-06  | 0.215 | 0.218 |          |       |  |                     |         |

|            |    |             |          |       |       |          |       |  |                  |         |
|------------|----|-------------|----------|-------|-------|----------|-------|--|------------------|---------|
| cg22956023 | 2  | 96,675,729  | 0.001162 | 0.215 | 0.144 |          |       |  | <i>LOC729234</i> | TSS1500 |
| cg05527530 | 1  | 197,882,003 | 0.02914  | 0.215 | 0.254 |          |       |  | <i>LHX9</i>      | Body    |
| cg27544190 | 21 | 33,785,434  | 0.000106 | 0.215 | 0.149 | 1.08E-26 | 0.138 |  | <i>C21orf63</i>  | Body    |
| cg00615485 | 7  | 29,519,656  | 2.09E-07 | 0.215 | 0.211 |          |       |  | <i>CHN2</i>      | 5'UTR   |
| cg00965023 | 19 | 11,785,188  | 7.41E-06 | 0.215 | 0.162 |          |       |  | <i>ZNF833</i>    | Body    |
| cg12157673 | 19 | 52,996,617  | 0.000953 | 0.215 | 0.189 |          |       |  | <i>ZNF578</i>    | 5'UTR   |
| cg19361800 | 2  | 208,014,177 | 5.83E-09 | 0.215 | 0.215 |          |       |  | <i>KLF7</i>      | Body    |
| cg22805381 | 14 | 51,760,188  | 0.001279 | 0.215 | 0.238 |          |       |  |                  |         |
| cg23875404 | 13 | 36,728,869  | 2.6E-07  | 0.215 | 0.175 |          |       |  |                  |         |
| cg27050153 | 14 | 102,030,110 | 5.88E-05 | 0.215 | 0.189 |          |       |  |                  |         |
| cg12335447 | 22 | 37,546,115  | 0.00011  | 0.215 | 0.177 |          |       |  | <i>IL2RB</i>     | TSS200  |
| cg18877667 | 17 | 48,051,089  | 0.000155 | 0.215 | 0.185 |          |       |  | <i>DLX4</i>      | Body    |
| cg02898293 | 20 | 25,061,762  | 4.77E-05 | 0.215 | 0.193 |          |       |  | <i>VSX1</i>      | Body    |
| cg08078648 | 2  | 236,236,591 | 0.000565 | 0.215 | 0.209 |          |       |  |                  |         |
| cg10270306 | 6  | 151,561,032 | 2.89E-07 | 0.215 | 0.210 |          |       |  | <i>AKAP12</i>    | TSS200  |
| cg15822982 | 10 | 95,517,895  | 0.007146 | 0.215 | 0.226 |          |       |  | <i>LGI1</i>      | 5'UTR   |
| cg18229767 | 11 | 67,776,576  | 1.77E-07 | 0.215 | 0.232 |          |       |  | <i>ALDH3B1</i>   | TSS1500 |
| cg14913644 | 19 | 11,530,065  | 0.003016 | 0.215 | 0.218 |          |       |  | <i>RGL3</i>      | TSS200  |
| cg00849610 | 17 | 59,529,316  | 7.88E-05 | 0.215 | 0.206 |          |       |  |                  |         |
| cg01767631 | 13 | 20,716,728  | 0.002899 | 0.215 | 0.189 |          |       |  | <i>GJA3</i>      | Body    |
| cg14763104 | 11 | 2,406,384   | 3.06E-08 | 0.215 | 0.191 |          |       |  | <i>CD81</i>      | Body    |
| cg04094225 | 6  | 24,930,971  | 4.99E-06 | 0.215 | 0.250 |          |       |  |                  |         |
| cg18392644 | 1  | 1,951,466   | 0.000272 | 0.215 | 0.223 |          |       |  | <i>GABRD</i>     | Body    |
| cg25636478 | 20 | 6,750,989   | 0.0008   | 0.215 | 0.158 |          |       |  | <i>BMP2</i>      | Body    |
| cg00221382 | 16 | 54,322,308  | 2.24E-07 | 0.215 | 0.178 |          |       |  |                  |         |
| cg08817983 | 4  | 3,391,423   | 2.3E-10  | 0.215 | 0.208 |          |       |  | <i>RGS12</i>     | Body    |
| cg03703733 | 6  | 168,147,981 | 3.24E-23 | 0.215 | 0.203 |          |       |  |                  |         |
| cg17884766 | 12 | 50,641,260  | 1.3E-05  | 0.215 | 0.252 |          |       |  | <i>LIMA1</i>     | Body    |
| cg21686171 | 1  | 9,504,429   | 6.08E-13 | 0.215 | 0.199 |          |       |  |                  |         |
| cg07402310 | 17 | 40,424,590  | 1.6E-07  | 0.215 | 0.232 |          |       |  | <i>STAT5B</i>    | 5'UTR   |
| cg13632655 | 7  | 158,266,097 | 1.54E-07 | 0.215 | 0.189 |          |       |  | <i>PTPRN2</i>    | Body    |
| cg19119594 | 22 | 45,094,547  | 8.5E-08  | 0.215 | 0.198 |          |       |  | <i>PRR5</i>      | 5'UTR   |
| cg26678920 | 11 | 6,341,888   | 0.000705 | 0.215 | 0.205 |          |       |  | <i>PRKCDBP</i>   | TSS200  |
| cg01627669 | 12 | 8,068,706   | 0.003696 | 0.215 | 0.148 |          |       |  |                  |         |

|            |    |             |          |       |       |          |       |  |                |         |
|------------|----|-------------|----------|-------|-------|----------|-------|--|----------------|---------|
| cg09435415 | 8  | 105,479,383 | 0.026648 | 0.215 | 0.193 |          |       |  | <i>DPYS</i>    | TSS200  |
| cg18736431 | 2  | 240,253,264 | 1.49E-11 | 0.215 | 0.204 |          |       |  | <i>HDAC4</i>   | Body    |
| cg08474859 | 4  | 85,414,016  | 0.000413 | 0.215 | 0.244 |          |       |  |                |         |
| cg16459349 | 11 | 6,341,717   | 0.00797  | 0.215 | 0.262 |          |       |  | <i>PRKCDBP</i> | 5'UTR   |
| cg00094412 | 6  | 29,592,854  | 2.76E-07 | 0.215 | 0.223 |          |       |  | <i>GABBR1</i>  | Body    |
| cg11345143 | 13 | 20,989,349  | 2.17E-13 | 0.215 | 0.195 |          |       |  | <i>CRYL1</i>   | Body    |
| cg24100636 | 12 | 3,600,087   | 0.045004 | 0.215 | 0.197 |          |       |  | <i>PRMT8</i>   | TSS1500 |
| cg03205238 | 2  | 128,440,053 | 8.71E-23 | 0.215 | 0.219 |          |       |  | <i>LIMS2</i>   | TSS1500 |
| cg14129735 | 6  | 30,737,007  | 7.4E-05  | 0.215 | 0.205 |          |       |  |                |         |
| cg21275283 | 17 | 18,011,513  | 2.19E-06 | 0.215 | 0.239 |          |       |  | <i>MYO15A</i>  | TSS1500 |
| cg13282837 | 14 | 96,180,648  | 0.01059  | 0.215 | 0.211 | 4.77E-13 | 0.158 |  | <i>TCL1A</i>   | TSS200  |
| cg17738010 | 2  | 3,452,437   | 0.000551 | 0.215 | 0.196 |          |       |  | <i>TTC15</i>   | Body    |
| cg26783160 | 8  | 140,871,183 | 3.74E-38 | 0.215 | 0.209 |          |       |  | <i>TRAPPC9</i> | Body    |
| cg05000748 | 21 | 36,399,146  | 2.48E-05 | 0.215 | 0.219 |          |       |  | <i>RUNX1</i>   | Body    |
| cg20038996 | 4  | 41,883,107  | 0.004682 | 0.215 | 0.286 |          |       |  |                |         |
| cg21151432 | 2  | 25,142,229  | 0.03873  | 0.215 | 0.144 |          |       |  | <i>ADCY3</i>   | TSS200  |
| cg02198895 | 13 | 110,759,424 | 1.04E-07 | 0.215 | 0.184 |          |       |  |                |         |
| cg17936572 | 3  | 35,706,114  | 0.004967 | 0.215 | 0.233 |          |       |  | <i>ARPP-21</i> | 5'UTR   |
| cg22375853 | 17 | 58,928,702  | 1.56E-12 | 0.215 | 0.199 |          |       |  | <i>BCAS3</i>   | Body    |
| cg25970832 | 18 | 28,621,651  | 0.031461 | 0.215 | 0.167 |          |       |  | <i>DSC3</i>    | Body    |
| cg01441113 | 4  | 186,560,403 | 1.14E-05 | 0.215 | 0.186 |          |       |  | <i>SORBS2</i>  | Body    |
| cg20440891 | 7  | 28,448,103  | 3.61E-09 | 0.215 | 0.171 |          |       |  | <i>CREB5</i>   | 5'UTR   |
| cg00590620 | 18 | 12,254,690  | 0.002906 | 0.215 | 0.225 |          |       |  | <i>CIDEA</i>   | Body    |
| cg10640333 | 2  | 63,280,625  | 0.000118 | 0.215 | 0.209 |          |       |  | <i>OTX1</i>    | Body    |
| cg04219544 | 17 | 38,860,042  | 0.005952 | 0.215 | 0.271 |          |       |  | <i>KRT24</i>   | TSS200  |
| cg04939673 | 4  | 184,019,125 | 1E-05    | 0.215 | 0.199 |          |       |  | <i>C4orf38</i> | Body    |
| cg06995715 | 16 | 86,612,590  | 1.04E-05 | 0.215 | 0.167 | 2.15E-12 | 0.177 |  | <i>FOXL1</i>   | 1stExon |
| cg19577671 | 19 | 42,782,524  | 1.16E-20 | 0.215 | 0.216 |          |       |  |                |         |
| cg21151355 | 1  | 35,246,607  | 0.000225 | 0.215 | 0.159 |          |       |  | <i>GJB3</i>    | TSS200  |
| cg02260710 | 16 | 85,730,584  | 0.000266 | 0.215 | 0.221 |          |       |  |                |         |
| cg04843067 | 2  | 177,016,037 | 5.34E-07 | 0.215 | 0.180 |          |       |  | <i>HOXD4</i>   | TSS200  |
| cg17178175 | 2  | 178,109,973 | 8.04E-06 | 0.215 | 0.214 |          |       |  | <i>NFE2L2</i>  | Body    |
| cg17275781 | 14 | 103,740,085 | 0.003003 | 0.215 | 0.236 |          |       |  |                |         |
| cg22264436 | 17 | 41,836,423  | 1.67E-05 | 0.215 | 0.188 | 7.77E-20 | 0.178 |  | <i>SOST</i>    | TSS1500 |

|            |    |             |          |       |       |            |       |  |                  |         |
|------------|----|-------------|----------|-------|-------|------------|-------|--|------------------|---------|
| cg25696974 | 6  | 33,396,405  | 1.09E-05 | 0.215 | 0.185 |            |       |  | <i>SYNGAP1</i>   | Body    |
| cg06875552 | 2  | 177,320,218 | 1.7E-06  | 0.215 | 0.198 |            |       |  |                  |         |
| cg10140454 | 17 | 17,626,019  | 2.77E-08 | 0.215 | 0.222 |            |       |  | <i>RAI1</i>      | 5'UTR   |
| cg02284014 | 6  | 41,674,099  | 0.009154 | 0.215 | 0.208 |            |       |  | <i>TFEB</i>      | 5'UTR   |
| cg22344841 | 2  | 20,421,656  | 0.001838 | 0.215 | 0.248 |            |       |  | <i>SDC1</i>      | Body    |
| cg08570118 | 7  | 155,025,533 | 1.45E-06 | 0.215 | 0.180 |            |       |  |                  |         |
| cg10406414 | 8  | 49,587,029  | 4.44E-10 | 0.215 | 0.202 |            |       |  |                  |         |
| cg24938761 | 19 | 2,091,406   | 8E-10    | 0.215 | 0.199 |            |       |  | <i>MOBKL2A</i>   | 5'UTR   |
| cg02318567 | 16 | 31,548,908  | 0.026266 | 0.215 | 0.245 |            |       |  |                  |         |
| cg02551743 | 2  | 66,673,428  | 1.23E-05 | 0.215 | 0.207 |            |       |  | <i>MEIS1</i>     | Body    |
| cg06756919 | 14 | 37,135,898  | 0.002399 | 0.215 | 0.151 |            |       |  | <i>PAX9</i>      | Body    |
| cg00871371 | 17 | 75,371,476  | 5.78E-05 | 0.215 | 0.188 |            |       |  | <i>SEPT9</i>     | 5'UTR   |
| cg03491584 | 19 | 17,958,961  | 0.00034  | 0.215 | 0.162 |            |       |  | <i>JAK3</i>      | TSS200  |
| cg14832908 | 1  | 6,479,424   | 0.000409 | 0.215 | 0.134 |            |       |  | <i>HES2</i>      | Body    |
| cg15798221 | 17 | 62,773,704  | 2.67E-10 | 0.215 | 0.198 |            |       |  | <i>LOC146880</i> | Body    |
| cg08527797 | 12 | 53,730,072  | 8.52E-06 | 0.215 | 0.214 |            |       |  | <i>SP7</i>       | TSS1500 |
| cg13847070 | 5  | 137,071,523 | 0.042498 | 0.215 | 0.039 | 0.00026383 | 0.114 |  | <i>KLHL3</i>     | 5'UTR   |
| cg21475402 | 1  | 156,612,140 | 0.01261  | 0.215 | 0.173 | 0.00000414 | 0.114 |  | <i>BCAN</i>      | 5'UTR   |
| cg09332960 | 2  | 1,787,990   | 0.001532 | 0.215 | 0.187 |            |       |  |                  |         |
| cg09595020 | 7  | 2,654,120   | 0.000309 | 0.215 | 0.173 |            |       |  | <i>IQCE</i>      | 3'UTR   |
| cg11149930 | 2  | 119,593,625 | 0.017    | 0.215 | 0.236 |            |       |  |                  |         |
| cg02880444 | 17 | 29,860,851  | 1.93E-09 | 0.215 | 0.251 |            |       |  | <i>RAB11FIP4</i> | 3'UTR   |
| cg16484162 | 11 | 8,133,258   | 2.03E-08 | 0.215 | 0.204 |            |       |  | <i>RIC3</i>      | Body    |
| cg16528895 | 2  | 108,994,311 | 0.004385 | 0.215 | 0.120 |            |       |  | <i>SULT1C4</i>   | TSS200  |
| cg18064256 | 19 | 45,905,621  | 2.01E-13 | 0.215 | 0.219 |            |       |  | <i>PPP1R13L</i>  | 5'UTR   |
| cg18470295 | 17 | 8,868,834   | 0.017146 | 0.215 | 0.067 |            |       |  | <i>PIK3R5</i>    | 5'UTR   |
| cg06697175 | 11 | 110,047,230 | 4.71E-05 | 0.215 | 0.272 |            |       |  |                  |         |
| cg27310831 | 8  | 120,685,124 | 4.11E-09 | 0.215 | 0.202 |            |       |  |                  |         |
| cg02299195 | 11 | 48,185,069  | 1.18E-40 | 0.215 | 0.216 |            |       |  | <i>PTPRJ</i>     | Body    |
| cg00000321 | 8  | 41,167,802  | 1.73E-05 | 0.215 | 0.172 |            |       |  | <i>SFRP1</i>     | TSS1500 |
| cg15357156 | 1  | 23,884,373  | 6.92E-07 | 0.215 | 0.215 |            |       |  |                  |         |
| cg24717935 | 3  | 27,756,281  | 0.025921 | 0.215 | 0.150 |            |       |  |                  |         |
| cg26820636 | 2  | 237,083,222 | 2.05E-05 | 0.215 | 0.208 |            |       |  |                  |         |
| cg00201133 | 10 | 35,740,216  | 1.25E-08 | 0.215 | 0.201 |            |       |  | <i>CCNY</i>      | Body    |

|            |    |             |          |       |       |       |       |     |                 |         |
|------------|----|-------------|----------|-------|-------|-------|-------|-----|-----------------|---------|
| cg01782097 | 1  | 846,637     | 1.57E-09 | 0.215 | 0.218 |       |       |     |                 |         |
| cg18792381 | 5  | 179,781,547 | 1.19E-10 | 0.215 | 0.204 |       |       |     | <i>GFPT2</i>    | TSS1500 |
| cg03707308 | 6  | 6,002,766   | 0.031597 | 0.215 | 0.274 |       |       |     | <i>NRN1</i>     | Body    |
| cg06493386 | 8  | 72,987,797  | 0.000559 | 0.215 | 0.225 | 7E-25 | 0.195 |     | <i>TRPA1</i>    | 1stExon |
| cg07598052 | 20 | 35,274,639  | 2.75E-06 | 0.215 | 0.222 |       |       |     | <i>SLA2</i>     | TSS200  |
| cg11547613 | 8  | 38,308,427  | 3.07E-09 | 0.215 | 0.218 |       |       |     | <i>FGFR1</i>    | Body    |
| cg23164938 | 6  | 152,128,366 | 0.028919 | 0.215 | 0.094 |       |       |     | <i>ESR1</i>     | TSS1500 |
| cg21411812 | 8  | 67,875,646  | 1.28E-05 | 0.215 | 0.228 |       |       |     |                 |         |
| cg15353061 | 14 | 51,562,486  | 0.001656 | 0.215 | 0.114 |       |       |     | <i>TRIM9</i>    | TSS200  |
| cg01853949 | 16 | 66,537,403  | 2.02E-14 | 0.215 | 0.208 |       |       |     |                 |         |
| cg16458153 | 6  | 33,160,192  | 1.41E-15 | 0.215 | 0.187 |       |       |     | <i>COL11A2</i>  | 5'UTR   |
| cg17159058 | 8  | 1,704,075   | 0.002406 | 0.215 | 0.185 |       |       |     |                 |         |
| cg02304233 | 1  | 147,070,522 | 0.002866 | 0.215 | 0.140 |       |       |     | <i>BCL9</i>     | 5'UTR   |
| cg17447502 | 1  | 6,478,857   | 7.98E-05 | 0.215 | 0.169 |       |       |     | <i>HES2</i>     | 3'UTR   |
| cg01456368 | 3  | 52,351,859  | 0.00728  | 0.215 | 0.201 |       |       |     | <i>DNAH1</i>    | 5'UTR   |
| cg13696609 | 9  | 100,617,710 | 0.000564 | 0.215 | 0.193 |       |       |     | <i>FOXE1</i>    | 3'UTR   |
| cg15883603 | 4  | 186,622,408 | 1.78E-15 | 0.215 | 0.212 |       |       |     | <i>SORBS2</i>   | 5'UTR   |
| cg09703136 | 4  | 173,995,054 | 3.5E-08  | 0.215 | 0.213 |       |       |     |                 |         |
| cg20719980 | 2  | 36,616,441  | 0.001898 | 0.215 | 0.164 |       |       |     | <i>CRIM1</i>    | Body    |
| cg01701555 | 1  | 146,544,097 | 1.48E-05 | 0.215 | 0.204 |       |       |     |                 |         |
| cg03469471 | 7  | 150,707,830 | 0.000305 | 0.215 | 0.232 |       |       | Yes | <i>NOS3</i>     | Body    |
| cg11698035 | 17 | 73,105,356  | 2.54E-09 | 0.215 | 0.207 |       |       |     | <i>ARMC7</i>    | TSS1500 |
| cg12782933 | 11 | 116,451,038 | 0.002009 | 0.215 | 0.204 |       |       |     |                 |         |
| cg16498391 | 18 | 12,421,072  | 8.2E-10  | 0.215 | 0.189 |       |       |     | <i>SLMO1</i>    | Body    |
| cg03020545 | 6  | 73,330,358  | 0.002715 | 0.215 | 0.246 |       |       |     | <i>KCNQ5</i>    | TSS1500 |
| cg10208654 | X  | 135,230,613 | 2.68E-05 | 0.215 | 0.216 |       |       |     | <i>FHL1</i>     | Body    |
| cg24172675 | 14 | 105,830,248 | 1.14E-13 | 0.215 | 0.212 |       |       |     | <i>PACS2</i>    | Body    |
| cg25170822 | 12 | 50,344,458  | 9.7E-19  | 0.215 | 0.203 |       |       |     | <i>AQP2</i>     | TSS200  |
| cg04139223 | 5  | 528,962     | 0.03554  | 0.215 | 0.256 |       |       |     |                 |         |
| cg21051580 | 7  | 4,998,415   | 4.04E-05 | 0.215 | 0.196 |       |       |     | <i>MMD2</i>     | Body    |
| cg23037132 | 1  | 40,105,664  | 6.87E-05 | 0.215 | 0.220 |       |       |     | <i>HEYL</i>     | TSS1500 |
| cg23281803 | 8  | 121,138,317 | 0.005266 | 0.215 | 0.236 |       |       |     | <i>COL14A1</i>  | 5'UTR   |
| cg12309360 | 5  | 177,412,636 | 3.07E-05 | 0.215 | 0.211 |       |       |     |                 |         |
| cg16597406 | 17 | 8,130,173   | 0.001085 | 0.215 | 0.174 |       |       |     | <i>C17orf68</i> | 3'UTR   |



|            |    |             |          |       |       |          |       |  |                 |         |
|------------|----|-------------|----------|-------|-------|----------|-------|--|-----------------|---------|
| cg08681924 | 3  | 62,359,924  | 0.025832 | 0.215 | 0.198 |          |       |  | <i>FEZF2</i>    | TSS1500 |
| cg25658884 | 6  | 88,054,637  | 0.000623 | 0.215 | 0.191 |          |       |  | <i>C6orf163</i> | 1stExon |
| cg12049550 | 1  | 65,035,261  | 1.3E-07  | 0.215 | 0.188 |          |       |  | <i>CACHD1</i>   | Body    |
| cg22171829 | 7  | 95,225,520  | 0.033742 | 0.215 | 0.297 | 6.03E-09 | 0.163 |  | <i>PDK4</i>     | 1stExon |
| cg24804144 | 15 | 101,203,595 | 6.02E-07 | 0.215 | 0.216 |          |       |  |                 |         |
| cg25758690 | 17 | 21,414,701  | 0.001813 | 0.215 | 0.226 |          |       |  |                 |         |
| cg04855216 | 5  | 118,609,467 | 6.78E-05 | 0.215 | 0.246 |          |       |  | <i>TNFAIP8</i>  | Body    |
| cg05525649 | 6  | 32,156,269  | 3.04E-37 | 0.215 | 0.210 |          |       |  | <i>PBX2</i>     | Body    |
| cg06925882 | 16 | 85,157,885  | 2.08E-18 | 0.215 | 0.206 |          |       |  |                 |         |
| cg09624466 | 14 | 57,278,710  | 0.032947 | 0.215 | 0.285 |          |       |  | <i>OTX2OS1</i>  | TSS1500 |
| cg13286614 | 7  | 96,655,501  | 3.88E-10 | 0.215 | 0.205 |          |       |  | <i>DLX5</i>     | TSS1500 |
| cg15541170 | 2  | 238,224,257 | 0.000126 | 0.215 | 0.205 |          |       |  |                 |         |
| cg19059839 | 6  | 33,085,577  | 7.27E-05 | 0.215 | 0.224 |          |       |  | <i>HLA-DPB2</i> | Body    |
| cg19251600 | 6  | 168,672,660 | 1.04E-11 | 0.215 | 0.213 |          |       |  |                 |         |
| cg23622616 | 2  | 236,444,259 | 7.59E-06 | 0.215 | 0.198 |          |       |  | <i>AGAP1</i>    | Body    |
| cg24185357 | 10 | 38,069,909  | 5.41E-05 | 0.215 | 0.212 |          |       |  |                 |         |
| cg25037841 | 22 | 20,237,341  | 2.04E-06 | 0.215 | 0.207 |          |       |  | <i>RTN4R</i>    | Body    |
| cg00768993 | 2  | 200,335,874 | 0.018647 | 0.215 | 0.178 |          |       |  | <i>FLJ32063</i> | Body    |
| cg10009497 | 7  | 1,095,416   | 1.45E-11 | 0.215 | 0.216 |          |       |  | <i>C7orf50</i>  | Body    |
| cg15605858 | 15 | 29,395,932  | 0.000745 | 0.215 | 0.175 |          |       |  | <i>APBA2</i>    | Body    |
| cg26431815 | 8  | 668,053     | 0.003388 | 0.215 | 0.194 |          |       |  | <i>ERICH1</i>   | Body    |
| cg24199834 | 4  | 147,560,126 | 0.035965 | 0.215 | 0.195 | 2.29E-14 | 0.179 |  | <i>POU4F2</i>   | 1stExon |
| cg00502254 | 1  | 12,201,600  | 4.43E-07 | 0.215 | 0.178 |          |       |  | <i>TNFRSF8</i>  | Body    |
| cg22469388 | 17 | 48,912,860  | 4.42E-05 | 0.215 | 0.255 |          |       |  | <i>WFIKKN2</i>  | 1stExon |
| cg02992546 | 18 | 14,748,439  | 0.011611 | 0.215 | 0.188 |          |       |  | <i>ANKRD30B</i> | 1stExon |
| cg04051565 | 2  | 171,211,176 | 2.34E-06 | 0.215 | 0.188 |          |       |  | <i>MYO3B</i>    | Body    |
| cg27059389 | 8  | 10,855,370  | 0.001889 | 0.215 | 0.179 |          |       |  | <i>XKR6</i>     | Body    |
| cg03387346 | 5  | 54,526,536  | 6.54E-05 | 0.215 | 0.218 |          |       |  |                 |         |
| cg14679780 | 19 | 4,059,525   | 9.76E-11 | 0.215 | 0.232 |          |       |  | <i>ZBTB7A</i>   | 5'UTR   |
| cg04792330 | 20 | 21,001,266  | 0.022557 | 0.215 | 0.172 |          |       |  |                 |         |
| cg07289335 | 5  | 158,937,447 | 4.27E-05 | 0.215 | 0.170 |          |       |  |                 |         |
| cg13734833 | 11 | 68,779,817  | 5.53E-11 | 0.215 | 0.211 |          |       |  | <i>MRGPRF</i>   | 5'UTR   |
| cg06288788 | 16 | 65,158,052  | 0.003908 | 0.215 | 0.202 |          |       |  |                 |         |
| cg17366225 | 4  | 11,398,983  | 1.4E-07  | 0.215 | 0.225 |          |       |  |                 |         |

|            |    |             |          |       |       |            |       |  |                 |         |
|------------|----|-------------|----------|-------|-------|------------|-------|--|-----------------|---------|
| cg02003272 | 13 | 50,702,719  | 1.57E-08 | 0.215 | 0.195 |            |       |  |                 |         |
| cg19317715 | 17 | 40,996,578  | 1.79E-05 | 0.215 | 0.216 | 6.23E-15   | 0.179 |  | <i>AOC2</i>     | TSS200  |
| cg11122255 | 10 | 24,995,583  | 0.000277 | 0.215 | 0.214 |            |       |  | <i>ARHGAP21</i> | Body    |
| cg00636508 | 16 | 70,624,430  | 1.35E-05 | 0.214 | 0.163 |            |       |  |                 |         |
| cg20082877 | 18 | 19,926,966  | 0.000188 | 0.214 | 0.193 |            |       |  |                 |         |
| cg18236079 | 17 | 13,505,590  | 0.035482 | 0.214 | 0.100 | 0.00208438 | 0.047 |  | <i>HS3ST3A1</i> | TSS1500 |
| cg12656424 | 2  | 18,923,186  | 4.4E-07  | 0.214 | 0.213 |            |       |  |                 |         |
| cg19810715 | 17 | 55,483,844  | 0.000773 | 0.214 | 0.187 |            |       |  | <i>MSI2</i>     | Body    |
| cg06284231 | 14 | 38,724,255  | 0.003533 | 0.214 | 0.264 |            |       |  | <i>CLEC14A</i>  | 1stExon |
| cg27642554 | 6  | 146,755,622 | 0.028114 | 0.214 | 0.209 |            |       |  | <i>GRM1</i>     | 3'UTR   |
| cg13445593 | 6  | 30,228,076  | 0.003931 | 0.214 | 0.186 |            |       |  | <i>HLA-L</i>    | Body    |
| cg02096793 | 4  | 683,148     | 3.43E-08 | 0.214 | 0.200 |            |       |  | <i>MFSD7</i>    | TSS200  |
| cg05171197 | 2  | 240,230,850 | 2.11E-13 | 0.214 | 0.217 |            |       |  | <i>HDAC4</i>    | Body    |
| cg09918751 | 15 | 100,517,450 | 2.65E-07 | 0.214 | 0.211 |            |       |  | <i>ADAMTS17</i> | Body    |
| cg18645081 | 1  | 221,051,758 | 4.38E-07 | 0.214 | 0.200 |            |       |  | <i>HLX</i>      | TSS1500 |
| cg01357292 | 3  | 42,947,771  | 0.034234 | 0.214 | 0.145 |            |       |  | <i>ZNF662</i>   | 5'UTR   |
| cg20785336 | 13 | 28,064,505  | 3.07E-05 | 0.214 | 0.214 |            |       |  |                 |         |
| cg10099827 | 16 | 85,551,514  | 5.65E-36 | 0.214 | 0.213 |            |       |  |                 |         |
| cg23121457 | 15 | 80,543,983  | 0.001342 | 0.214 | 0.124 |            |       |  |                 |         |
| cg14990808 | 6  | 28,493,651  | 4.81E-14 | 0.214 | 0.230 |            |       |  | <i>GPX5</i>     | TSS200  |
| cg17278072 | 7  | 155,258,411 | 0.014117 | 0.214 | 0.273 |            |       |  |                 |         |
| cg23894086 | 7  | 27,128,046  | 1.38E-06 | 0.214 | 0.222 |            |       |  |                 |         |
| cg13858975 | 15 | 52,016,644  | 9.24E-07 | 0.214 | 0.220 |            |       |  | <i>LYSMD2</i>   | Body    |
| cg16129132 | 11 | 3,182,119   | 2.7E-10  | 0.214 | 0.203 |            |       |  | <i>OSBPL5</i>   | 5'UTR   |
| cg20459495 | 2  | 159,779,958 | 0.005056 | 0.214 | 0.145 |            |       |  |                 |         |
| cg12850036 | 6  | 114,177,329 | 0.013857 | 0.214 | 0.158 |            |       |  | <i>MARCKS</i>   | TSS1500 |
| cg19951297 | 5  | 138,441,071 | 2.16E-11 | 0.214 | 0.190 |            |       |  | <i>SIL1</i>     | Body    |
| cg23554497 | 12 | 103,359,836 | 0.020833 | 0.214 | 0.210 |            |       |  |                 |         |
| cg09313931 | 6  | 149,803,444 | 8.1E-07  | 0.214 | 0.212 |            |       |  | <i>ZC3H12D</i>  | 5'UTR   |
| cg10180092 | 3  | 171,002,363 | 1.24E-05 | 0.214 | 0.207 |            |       |  | <i>TNIK</i>     | Body    |
| cg18065195 | 2  | 202,817,042 | 0.0072   | 0.214 | 0.165 |            |       |  |                 |         |
| cg00445405 | 2  | 63,281,844  | 1.34E-05 | 0.214 | 0.198 |            |       |  | <i>OTX1</i>     | Body    |
| cg04914930 | 13 | 44,785,481  | 1.83E-09 | 0.214 | 0.222 |            |       |  |                 |         |
| cg24039081 | 3  | 197,155,143 | 2.38E-05 | 0.214 | 0.191 |            |       |  |                 |         |

|            |    |             |          |       |       |  |  |  |              |         |
|------------|----|-------------|----------|-------|-------|--|--|--|--------------|---------|
| cg08480367 | X  | 38,080,608  | 9.84E-06 | 0.214 | 0.212 |  |  |  | SRPX         | TSS1500 |
| cg26159832 | 14 | 103,822,211 | 2.1E-06  | 0.214 | 0.162 |  |  |  |              |         |
| cg10540679 | 7  | 130,606,499 | 0.006182 | 0.214 | 0.218 |  |  |  |              |         |
| cg18515031 | 10 | 73,988,469  | 1.04E-11 | 0.214 | 0.237 |  |  |  | C10orf104    | Body    |
| cg21082400 | 5  | 72,595,958  | 0.000305 | 0.214 | 0.203 |  |  |  |              |         |
| cg13591408 | 12 | 104,920,290 | 1.88E-06 | 0.214 | 0.193 |  |  |  | CHST11       | Body    |
| cg24824178 | 5  | 141,263,222 | 0.03402  | 0.214 | 0.277 |  |  |  |              |         |
| cg08420415 | 22 | 38,477,802  | 0.002685 | 0.214 | 0.177 |  |  |  | SLC16A8      | Body    |
| cg16597737 | 1  | 173,572,370 | 2.43E-12 | 0.214 | 0.197 |  |  |  | SLC9A11      | TSS200  |
| cg14543998 | 20 | 3,220,719   | 0.000396 | 0.214 | 0.216 |  |  |  |              |         |
| cg01298678 | 9  | 126,772,537 | 0.004638 | 0.214 | 0.212 |  |  |  | LHX2         | TSS1500 |
| cg04639241 | 8  | 129,031,355 | 2.15E-08 | 0.214 | 0.221 |  |  |  | PVT1         | Body    |
| cg05732832 | 4  | 4,868,723   | 0.011522 | 0.214 | 0.240 |  |  |  |              |         |
| cg13284574 | 1  | 6,519,923   | 8.77E-05 | 0.214 | 0.210 |  |  |  | ESPN         | Body    |
| cg25130385 | 9  | 135,646,027 | 2.54E-06 | 0.214 | 0.204 |  |  |  | C9orf98      | Body    |
| cg13558774 | 4  | 1,196,025   | 4.95E-08 | 0.214 | 0.196 |  |  |  | LOC100130872 | Body    |
| cg19815340 | 3  | 27,770,391  | 7.66E-06 | 0.214 | 0.158 |  |  |  |              |         |
| cg01541347 | 7  | 4,729,920   | 2.29E-11 | 0.214 | 0.200 |  |  |  | FOKK1        | Body    |
| cg08433011 | 21 | 36,399,540  | 1.77E-05 | 0.214 | 0.224 |  |  |  | RUNX1        | Body    |
| cg09128529 | 2  | 227,586,520 | 6.53E-11 | 0.214 | 0.197 |  |  |  |              |         |
| cg11298786 | 1  | 228,195,794 | 0.000468 | 0.214 | 0.222 |  |  |  | WNT3A        | Body    |
| cg15856599 | 14 | 42,074,503  | 0.004961 | 0.214 | 0.269 |  |  |  |              |         |
| cg08655662 | 6  | 41,438,590  | 3.37E-05 | 0.214 | 0.211 |  |  |  |              |         |
| cg19821124 | 14 | 95,927,475  | 0.005754 | 0.214 | 0.196 |  |  |  | C14orf49     | Body    |
| cg05355411 | 8  | 70,449,272  | 0.000266 | 0.214 | 0.209 |  |  |  | SULF1        | 5'UTR   |
| cg18642271 | 19 | 46,180,314  | 0.000844 | 0.214 | 0.172 |  |  |  | GIPR         | Body    |
| cg01862363 | 17 | 8,928,028   | 5.33E-21 | 0.214 | 0.177 |  |  |  | NTN1         | Body    |
| cg08466034 | 17 | 16,318,930  | 0.002944 | 0.214 | 0.242 |  |  |  | TRPV2        | 1stExon |
| cg10933494 | 6  | 28,983,143  | 0.025325 | 0.214 | 0.135 |  |  |  |              |         |
| cg06145195 | X  | 152,107,440 | 3.16E-07 | 0.214 | 0.194 |  |  |  | ZNF185       | Body    |
| cg17587456 | 6  | 168,674,852 | 1.49E-07 | 0.214 | 0.193 |  |  |  |              |         |
| cg13584244 | 9  | 124,030,048 | 0.003647 | 0.214 | 0.084 |  |  |  | GSN          | TSS1500 |
| cg27098470 | 22 | 42,828,411  | 2.02E-17 | 0.214 | 0.201 |  |  |  | NFAM1        | TSS200  |
| cg25845597 | 6  | 27,841,122  | 0.038379 | 0.214 | 0.243 |  |  |  | HIST1H4L     | 1stExon |

|            |    |             |          |       |       |          |       |  |                 |         |
|------------|----|-------------|----------|-------|-------|----------|-------|--|-----------------|---------|
| cg06729034 | 15 | 51,339,830  | 1.64E-14 | 0.214 | 0.199 |          |       |  |                 |         |
| cg27470066 | 17 | 59,485,779  | 4.69E-07 | 0.214 | 0.200 |          |       |  | <i>TBX2</i>     | Body    |
| cg12226033 | 13 | 44,906,847  | 0.002608 | 0.214 | 0.237 |          |       |  |                 |         |
| cg13272465 | 4  | 140,200,658 | 0.039161 | 0.214 | 0.219 |          |       |  | <i>C4orf49</i>  | Body    |
| cg04132146 | 6  | 87,862,158  | 0.003949 | 0.214 | 0.150 |          |       |  |                 |         |
| cg06691520 | 10 | 95,517,738  | 4.58E-05 | 0.214 | 0.212 |          |       |  | <i>LGI1</i>     | 5'UTR   |
| cg05942459 | 6  | 101,846,805 | 5.2E-07  | 0.214 | 0.198 |          |       |  | <i>GRIK2</i>    | TSS200  |
| cg12057576 | 15 | 78,918,529  | 0.000148 | 0.214 | 0.214 |          |       |  | <i>CHRN4</i>    | Body    |
| cg22873661 | 14 | 88,788,597  | 0.044026 | 0.214 | 0.196 |          |       |  | <i>KCNK10</i>   | Body    |
| cg22892607 | 10 | 8,102,583   | 0.01373  | 0.214 | 0.162 |          |       |  | <i>GATA3</i>    | Body    |
| cg02571816 | 19 | 38,747,378  | 0.015584 | 0.214 | 0.237 |          |       |  | <i>PPP1R14A</i> | TSS1500 |
| cg12355681 | 13 | 99,404,153  | 0.001252 | 0.214 | 0.212 |          |       |  | <i>SLC15A1</i>  | Body    |
| cg12857945 | 14 | 37,127,275  | 3.67E-06 | 0.214 | 0.217 |          |       |  | <i>PAX9</i>     | 5'UTR   |
| cg22482700 | 1  | 68,594,186  | 0.007153 | 0.214 | 0.257 |          |       |  | <i>GPR177</i>   | Body    |
| cg16519587 | 6  | 26,614,649  | 0.002273 | 0.214 | 0.189 |          |       |  |                 |         |
| cg15135762 | 2  | 66,805,086  | 0.041761 | 0.214 | 0.255 |          |       |  |                 |         |
| cg11679455 | 10 | 8,100,761   | 7.03E-06 | 0.214 | 0.206 |          |       |  | <i>GATA3</i>    | Body    |
| cg11445123 | 20 | 2,781,478   | 0.017534 | 0.214 | 0.155 |          |       |  | <i>CPXM1</i>    | TSS200  |
| cg00073090 | 19 | 1,265,879   | 9.22E-09 | 0.214 | 0.206 |          |       |  |                 |         |
| cg06487082 | 18 | 56,530,106  | 7.72E-06 | 0.214 | 0.134 |          |       |  | <i>ZNF532</i>   | 1stExon |
| cg10997718 | 2  | 162,275,690 | 0.032014 | 0.214 | 0.217 |          |       |  | <i>TBR1</i>     | Body    |
| cg16865965 | 2  | 85,811,662  | 1.86E-05 | 0.214 | 0.215 |          |       |  | <i>VAMP5</i>    | Body    |
| cg24769879 | 19 | 46,503,907  | 0.002717 | 0.214 | 0.173 |          |       |  | <i>CCDC61</i>   | Body    |
| cg00503298 | 1  | 47,263,713  | 0.000577 | 0.214 | 0.199 |          |       |  | <i>CYP4B1</i>   | TSS1500 |
| cg01765545 | 5  | 81,045,418  | 0.004182 | 0.214 | 0.226 |          |       |  | <i>SSBP2</i>    | Body    |
| cg00547425 | 6  | 31,829,960  | 7.5E-06  | 0.214 | 0.153 |          |       |  | <i>NEU1</i>     | Body    |
| cg04094148 | 11 | 129,244,523 | 2.54E-06 | 0.214 | 0.221 |          |       |  | <i>BARX2</i>    | TSS1500 |
| cg07260592 | 6  | 161,100,122 | 0.006523 | 0.214 | 0.215 | 1.08E-29 | 0.266 |  |                 |         |
| cg11877773 | 14 | 71,660,200  | 4.98E-16 | 0.214 | 0.205 |          |       |  |                 |         |
| cg13801381 | 12 | 4,384,022   | 0.017627 | 0.214 | 0.201 | 1.71E-18 | 0.152 |  | <i>CCND2</i>    | Body    |
| cg00527825 | 15 | 74,218,418  | 4.59E-12 | 0.214 | 0.214 |          |       |  | <i>LOXL1</i>    | TSS1500 |
| cg00765737 | 13 | 110,993,493 | 1.48E-05 | 0.214 | 0.208 |          |       |  | <i>COL4A2</i>   | Body    |
| cg01391084 | 2  | 149,645,372 | 7.84E-05 | 0.214 | 0.247 |          |       |  | <i>KIF5C</i>    | Body    |
| cg22120063 | 5  | 72,596,188  | 0.002894 | 0.214 | 0.243 |          |       |  |                 |         |

|            |    |             |          |       |       |            |       |  |                           |         |
|------------|----|-------------|----------|-------|-------|------------|-------|--|---------------------------|---------|
| cg01530605 | 3  | 181,414,848 | 0.001585 | 0.214 | 0.250 |            |       |  | <i>SOX20T</i>             | Body    |
| cg03064067 | 12 | 85,306,916  | 0.017632 | 0.214 | 0.151 | 1.5E-19    | 0.164 |  | <i>SLC6A15</i>            | TSS1500 |
| cg09868780 | 5  | 115,299,071 | 0.007218 | 0.214 | 0.249 |            |       |  | <i>LVRN</i>               | Body    |
| cg12684209 | 6  | 393,110     | 0.018668 | 0.214 | 0.141 |            |       |  | <i>IRF4</i>               | 5'UTR   |
| cg16206090 | 18 | 20,916,335  | 4.72E-09 | 0.214 | 0.212 |            |       |  | <i>C18orf45</i>           | Body    |
| cg00008488 | 5  | 175,199,915 | 0.018939 | 0.214 | 0.226 |            |       |  |                           |         |
| cg12407867 | 4  | 1,167,369   | 2.76E-08 | 0.214 | 0.200 |            |       |  | <i>LOC100130872-SPON2</i> | Body    |
| cg15916160 | 16 | 54,972,094  | 0.022933 | 0.214 | 0.219 |            |       |  |                           |         |
| cg04621521 | 7  | 99,332,765  | 3.51E-10 | 0.214 | 0.181 |            |       |  | <i>CYP3A7</i>             | 5'UTR   |
| cg10364630 | 19 | 36,132,567  | 0.004073 | 0.214 | 0.262 |            |       |  | <i>ETV2</i>               | TSS200  |
| cg11058366 | 2  | 213,401,195 | 0.027512 | 0.214 | 0.099 |            |       |  | <i>ERBB4</i>              | Body    |
| cg12810212 | 2  | 232,379,626 | 0.004591 | 0.214 | 0.109 |            |       |  | <i>C2orf52</i>            | TSS1500 |
| cg22614327 | 1  | 17,750,198  | 4.05E-14 | 0.214 | 0.210 |            |       |  | <i>RCC2</i>               | Body    |
| cg02792602 | 2  | 218,808,859 | 2.12E-15 | 0.214 | 0.212 |            |       |  | <i>TNS1</i>               | TSS200  |
| cg11636504 | 2  | 99,439,883  | 1.38E-10 | 0.214 | 0.192 |            |       |  | <i>C2orf55</i>            | Body    |
| cg24820936 | 8  | 101,270,745 | 0.000305 | 0.214 | 0.215 |            |       |  | <i>RNF19A</i>             | 3'UTR   |
| cg27179680 | 1  | 205,460,879 | 2.73E-08 | 0.214 | 0.209 |            |       |  |                           |         |
| cg21469772 | 9  | 124,989,294 | 3.54E-05 | 0.214 | 0.208 |            |       |  | <i>LHX6</i>               | Body    |
| cg01351032 | 16 | 10,971,191  | 3.54E-08 | 0.214 | 0.202 | 5.5E-30    | 0.166 |  | <i>CIITA</i>              | 1stExon |
| cg03665078 | 5  | 118,689,961 | 1.19E-10 | 0.214 | 0.196 |            |       |  | <i>TNFAIP8</i>            | Body    |
| cg08341874 | 17 | 4,689,655   | 0.001444 | 0.214 | 0.165 | 0.01485097 | 0.054 |  | <i>VMO1</i>               | 1stExon |
| cg16957940 | 3  | 124,792,406 | 7.85E-13 | 0.214 | 0.187 |            |       |  |                           |         |
| cg02903822 | 8  | 134,203,379 | 0.000189 | 0.214 | 0.270 |            |       |  | <i>WISP1</i>              | 5'UTR   |
| cg13826452 | 6  | 26,758,395  | 3.54E-05 | 0.214 | 0.224 |            |       |  |                           |         |
| cg15765546 | 3  | 133,776,357 | 7E-08    | 0.214 | 0.211 |            |       |  |                           |         |
| cg14009075 | 22 | 43,807,401  | 1.59E-06 | 0.214 | 0.189 |            |       |  | <i>MPPED1</i>             | TSS1500 |
| cg26060817 | 5  | 14,406,676  | 7.33E-10 | 0.214 | 0.192 |            |       |  | <i>TRIO</i>               | Body    |
| cg02819256 | X  | 152,938,698 | 0.001558 | 0.214 | 0.236 |            |       |  | <i>PNCK</i>               | Body    |
| cg04196298 | 17 | 1,480,710   | 0.014793 | 0.214 | 0.334 |            |       |  | <i>SLC43A2</i>            | Body    |
| cg25590181 | 6  | 29,855,467  | 6.79E-07 | 0.214 | 0.226 |            |       |  | <i>HLA-H</i>              | Body    |
| cg05789711 | 16 | 23,724,428  | 0.000107 | 0.214 | 0.251 |            |       |  | <i>ERN2</i>               | 1stExon |
| cg11729679 | 2  | 111,877,065 | 4.99E-05 | 0.214 | 0.198 |            |       |  | <i>BCL2L11</i>            | TSS1500 |
| cg14505585 | 22 | 17,082,770  | 0.047844 | 0.214 | 0.264 |            |       |  | <i>psiTPTE22</i>          | TSS200  |
| cg00988247 | 3  | 169,378,758 | 3.25E-06 | 0.214 | 0.194 |            |       |  | <i>MECOM</i>              | Body    |

|            |    |             |          |       |       |          |       |  |                 |         |
|------------|----|-------------|----------|-------|-------|----------|-------|--|-----------------|---------|
| cg08548284 | 1  | 14,382,172  | 0.000982 | 0.214 | 0.228 |          |       |  |                 |         |
| cg16245261 | 11 | 6,342,357   | 0.00161  | 0.214 | 0.197 |          |       |  | <i>PRKCDBP</i>  | TSS1500 |
| cg19172487 | 22 | 44,394,856  | 5.37E-10 | 0.214 | 0.234 |          |       |  | <i>PARVB</i>    | TSS1500 |
| cg00211625 | 3  | 169,554,913 | 4.57E-20 | 0.214 | 0.219 |          |       |  | <i>LRRIQ4</i>   | Body    |
| cg03404742 | 16 | 58,314,575  | 0.000147 | 0.214 | 0.210 |          |       |  | <i>KLKBL4</i>   | Body    |
| cg12728020 | 1  | 114,698,322 | 0.012529 | 0.214 | 0.230 |          |       |  |                 |         |
| cg16399632 | 4  | 1,244,006   | 0.030015 | 0.214 | 0.123 |          |       |  | <i>CTBP1</i>    | TSS1500 |
| cg02494945 | 17 | 59,535,723  | 3.38E-09 | 0.214 | 0.203 |          |       |  | <i>TBX4</i>     | Body    |
| cg04102163 | 4  | 41,881,185  | 8.22E-06 | 0.214 | 0.199 |          |       |  |                 |         |
| cg22532194 | 18 | 77,231,654  | 8.4E-05  | 0.214 | 0.240 |          |       |  | <i>NFATC1</i>   | Body    |
| cg25884488 | 4  | 153,601,388 | 0.026342 | 0.214 | 0.195 |          |       |  | <i>TMEM154</i>  | TSS200  |
| cg01293179 | 2  | 176,996,285 | 0.000755 | 0.214 | 0.172 |          |       |  | <i>HOXD8</i>    | Body    |
| cg04439458 | 5  | 138,467,593 | 6.4E-10  | 0.214 | 0.184 |          |       |  | <i>SIL1</i>     | 5'UTR   |
| cg07047068 | 11 | 844,686     | 0.001754 | 0.214 | 0.147 |          |       |  | <i>TSPAN4</i>   | 5'UTR   |
| cg09804503 | 1  | 33,231,313  | 7.07E-20 | 0.214 | 0.197 |          |       |  | <i>KIAA1522</i> | Body    |
| cg12924654 | 7  | 138,348,384 | 5.72E-11 | 0.214 | 0.166 |          |       |  | <i>SVOPL</i>    | Body    |
| cg03479715 | 14 | 62,584,513  | 0.032235 | 0.214 | 0.232 |          |       |  | <i>FLJ43390</i> | Body    |
| cg23696593 | 10 | 28,200,623  | 1.8E-09  | 0.214 | 0.213 |          |       |  | <i>ARMC4</i>    | Body    |
| cg06254440 | 9  | 126,779,285 | 0.022169 | 0.214 | 0.222 |          |       |  | <i>LHX2</i>     | Body    |
| cg09045262 | 1  | 19,600,817  | 2.36E-05 | 0.214 | 0.178 |          |       |  | <i>AKR7L</i>    | TSS1500 |
| cg18449997 | 17 | 40,574,243  | 0.019654 | 0.214 | 0.293 |          |       |  | <i>PTRF</i>     | Body    |
| cg10521767 | 1  | 237,116,052 | 0.024387 | 0.214 | 0.092 |          |       |  |                 |         |
| cg13024368 | 11 | 12,030,088  | 0.003273 | 0.214 | 0.296 |          |       |  | <i>DKK3</i>     | 1stExon |
| cg07680167 | 11 | 17,717,574  | 0.041968 | 0.214 | 0.253 |          |       |  |                 |         |
| cg18085407 | 1  | 244,080,114 | 1.2E-14  | 0.214 | 0.195 |          |       |  |                 |         |
| cg23359714 | 8  | 41,168,336  | 0.001235 | 0.214 | 0.196 |          |       |  | <i>SFRP1</i>    | TSS1500 |
| cg09462240 | 4  | 1,409,497   | 0.001673 | 0.214 | 0.192 |          |       |  |                 |         |
| cg16099023 | 6  | 58,148,810  | 3.32E-05 | 0.214 | 0.194 |          |       |  |                 |         |
| cg20096204 | 3  | 169,378,675 | 7.1E-05  | 0.214 | 0.188 |          |       |  | <i>MECOM</i>    | Body    |
| cg17711717 | 9  | 34,590,391  | 0.005664 | 0.214 | 0.175 |          |       |  | <i>CNTFR</i>    | TSS1500 |
| cg00308159 | 22 | 28,198,591  | 6.33E-08 | 0.214 | 0.218 |          |       |  | <i>MN1</i>      | TSS1500 |
| cg15975890 | 5  | 11,903,145  | 0.039119 | 0.214 | 0.156 |          |       |  | <i>CTNND2</i>   | Body    |
| cg19692710 | 11 | 73,661,920  | 1.5E-05  | 0.214 | 0.231 | 1.77E-21 | 0.156 |  | <i>DNAJB13</i>  | 1stExon |
| cg22480783 | 2  | 25,149,622  | 3.9E-05  | 0.214 | 0.190 |          |       |  |                 |         |

|            |    |             |          |       |       |  |  |  |                  |         |
|------------|----|-------------|----------|-------|-------|--|--|--|------------------|---------|
| cg27314116 | 5  | 6,583,850   | 9.94E-08 | 0.214 | 0.198 |  |  |  | <i>LOC255167</i> | Body    |
| cg04242499 | 5  | 140,749,745 | 0.002943 | 0.214 | 0.227 |  |  |  | <i>PCDHGA4</i>   | Body    |
| cg26047334 | 2  | 218,785,909 | 3.28E-06 | 0.214 | 0.230 |  |  |  | <i>TNS1</i>      | 5'UTR   |
| cg26537209 | 16 | 54,324,187  | 2.69E-05 | 0.214 | 0.160 |  |  |  |                  |         |
| cg17328839 | 1  | 64,127,751  | 1.68E-05 | 0.214 | 0.193 |  |  |  |                  |         |
| cg06456154 | 10 | 119,310,356 | 0.027909 | 0.214 | 0.273 |  |  |  |                  |         |
| cg16309595 | 12 | 103,359,445 | 1.16E-05 | 0.214 | 0.196 |  |  |  |                  |         |
| cg16311536 | 10 | 105,344,174 | 0.000798 | 0.214 | 0.211 |  |  |  | <i>NEURL</i>     | Body    |
| cg20207470 | 17 | 37,366,501  | 4.93E-08 | 0.213 | 0.199 |  |  |  |                  |         |
| cg25161512 | 7  | 95,026,066  | 0.000561 | 0.213 | 0.182 |  |  |  | <i>PON3</i>      | TSS1500 |
| cg00610844 | 5  | 6,583,797   | 2.63E-05 | 0.213 | 0.193 |  |  |  | <i>LOC255167</i> | Body    |
| cg01587682 | 11 | 31,820,572  | 0.020624 | 0.213 | 0.222 |  |  |  | <i>PAX6</i>      | Body    |
| cg03099208 | 7  | 8,474,544   | 0.001564 | 0.213 | 0.147 |  |  |  | <i>NXPH1</i>     | 5'UTR   |
| cg03310838 | 16 | 88,545,042  | 3.97E-09 | 0.213 | 0.208 |  |  |  | <i>ZFPM1</i>     | Body    |
| cg06151464 | 2  | 179,278,855 | 0.042627 | 0.213 | 0.074 |  |  |  | <i>MIR548N</i>   | Body    |
| cg19725553 | 7  | 43,797,898  | 0.025368 | 0.213 | 0.185 |  |  |  | <i>BLVRA</i>     | TSS1500 |
| cg02888518 | 10 | 75,716,672  | 1.33E-06 | 0.213 | 0.181 |  |  |  |                  |         |
| cg06183559 | 13 | 95,357,818  | 0.003347 | 0.213 | 0.220 |  |  |  |                  |         |
| cg26502018 | 2  | 181,770,937 | 1.5E-12  | 0.213 | 0.189 |  |  |  |                  |         |
| cg05071823 | X  | 117,628,671 | 3.63E-09 | 0.213 | 0.207 |  |  |  | <i>DOCK11</i>    | TSS1500 |
| cg10824810 | 16 | 54,967,714  | 0.021977 | 0.213 | 0.257 |  |  |  | <i>IRX5</i>      | Body    |
| cg04370174 | 4  | 8,207,250   | 1.07E-10 | 0.213 | 0.208 |  |  |  | <i>SH3TC1</i>    | Body    |
| cg21917728 | 6  | 41,471,064  | 1.02E-10 | 0.213 | 0.201 |  |  |  |                  |         |
| cg11079129 | 5  | 172,669,916 | 0.019369 | 0.213 | 0.264 |  |  |  |                  |         |
| cg17484733 | 2  | 85,362,030  | 0.00111  | 0.213 | 0.222 |  |  |  | <i>TCF7L1</i>    | Body    |
| cg07237653 | 8  | 28,950,303  | 1.78E-17 | 0.213 | 0.183 |  |  |  | <i>KIF13B</i>    | Body    |
| cg14783814 | 1  | 98,511,792  | 0.006949 | 0.213 | 0.248 |  |  |  | <i>MIR137</i>    | TSS200  |
| cg19095568 | 15 | 41,062,113  | 1.84E-09 | 0.213 | 0.232 |  |  |  | <i>DNAJC17</i>   | Body    |
| cg20493526 | 2  | 3,714,936   | 3.03E-05 | 0.213 | 0.216 |  |  |  | <i>ALLC</i>      | 5'UTR   |
| cg23907108 | 11 | 64,405,993  | 0.005465 | 0.213 | 0.126 |  |  |  | <i>NRXN2</i>     | Body    |
| cg00787180 | 14 | 91,751,731  | 2.74E-05 | 0.213 | 0.196 |  |  |  | <i>CCDC88C</i>   | Body    |
| cg04145287 | 1  | 26,552,102  | 0.004218 | 0.213 | 0.250 |  |  |  |                  |         |
| cg12166018 | 15 | 72,564,196  | 0.013877 | 0.213 | 0.179 |  |  |  | <i>PARP6</i>     | TSS1500 |
| cg25575628 | 10 | 7,709,639   | 0.001474 | 0.213 | 0.227 |  |  |  | <i>ITIH5</i>     | TSS1500 |

|            |    |             |          |       |       |  |  |     |                  |         |
|------------|----|-------------|----------|-------|-------|--|--|-----|------------------|---------|
| cg10631947 | 5  | 54,281,668  | 0.000351 | 0.213 | 0.228 |  |  |     | <i>ESM1</i>      | TSS1500 |
| cg22473097 | 6  | 29,818,300  | 0.003097 | 0.213 | 0.189 |  |  |     |                  |         |
| cg08801887 | 11 | 67,811,194  | 5.32E-11 | 0.213 | 0.226 |  |  |     | <i>TCIRG1</i>    | Body    |
| cg11990630 | 13 | 100,641,978 | 8.82E-05 | 0.213 | 0.186 |  |  |     |                  |         |
| cg23423191 | 5  | 171,524,525 | 7.02E-09 | 0.213 | 0.187 |  |  |     | <i>STK10</i>     | Body    |
| cg10805039 | 17 | 750,241     | 0.017068 | 0.213 | 0.158 |  |  |     | <i>NXN</i>       | Body    |
| cg25782375 | 6  | 108,442,906 | 0.000196 | 0.213 | 0.219 |  |  |     |                  |         |
| cg12944183 | 14 | 104,073,931 | 0.008178 | 0.213 | 0.169 |  |  |     |                  |         |
| cg00060374 | 1  | 1,355,235   | 1.4E-07  | 0.213 | 0.180 |  |  |     | <i>LOC441869</i> | Body    |
| cg01450807 | 13 | 73,715,706  | 1.27E-06 | 0.213 | 0.218 |  |  |     |                  |         |
| cg14332524 | 14 | 65,770,225  | 2.08E-09 | 0.213 | 0.204 |  |  | Yes |                  |         |
| cg05049448 | 7  | 2,321,355   | 2.12E-10 | 0.213 | 0.226 |  |  |     | <i>SNX8</i>      | Body    |
| cg15590950 | 1  | 44,874,649  | 0.007532 | 0.213 | 0.256 |  |  |     | <i>RNF220</i>    | 5'UTR   |
| cg20402826 | 2  | 198,077,081 | 9.5E-13  | 0.213 | 0.202 |  |  |     |                  |         |
| cg06693983 | 19 | 55,889,216  | 4.26E-05 | 0.213 | 0.195 |  |  |     | <i>TMEM190</i>   | Body    |
| cg11481687 | 14 | 105,499,998 | 0.020543 | 0.213 | 0.258 |  |  |     |                  |         |
| cg13476200 | 9  | 124,578,224 | 8.11E-11 | 0.213 | 0.203 |  |  |     |                  |         |
| cg13967702 | 1  | 217,312,060 | 7.38E-11 | 0.213 | 0.198 |  |  |     | <i>ESRRG</i>     | TSS1500 |
| cg24881289 | 17 | 40,822,424  | 7.04E-11 | 0.213 | 0.202 |  |  |     | <i>PLEKHH3</i>   | Body    |
| cg01312762 | 22 | 42,222,192  | 7.27E-14 | 0.213 | 0.189 |  |  |     | <i>CCDC134</i>   | 3'UTR   |
| cg23654206 | 19 | 3,683,811   | 1.63E-05 | 0.213 | 0.168 |  |  |     | <i>PIP5K1C</i>   | Body    |
| cg01109169 | 2  | 71,134,630  | 0.004814 | 0.213 | 0.201 |  |  |     | <i>VAX2</i>      | Body    |
| cg11278311 | 17 | 4,544,507   | 7.33E-06 | 0.213 | 0.202 |  |  |     | <i>ALOX15</i>    | Body    |
| cg23490300 | 2  | 41,461,406  | 4.47E-09 | 0.213 | 0.203 |  |  |     |                  |         |
| cg04351088 | 2  | 225,183,651 | 0.018583 | 0.213 | 0.146 |  |  |     |                  |         |
| cg14376836 | 9  | 94,606,638  | 2.25E-09 | 0.213 | 0.197 |  |  |     | <i>ROR2</i>      | Body    |
| cg24427243 | 1  | 12,128,100  | 2.73E-06 | 0.213 | 0.197 |  |  |     | <i>TNFRSF8</i>   | Body    |
| cg02469838 | 16 | 54,404,655  | 0.000305 | 0.213 | 0.198 |  |  |     |                  |         |
| cg14046302 | 2  | 67,939,758  | 4.67E-07 | 0.213 | 0.188 |  |  |     |                  |         |
| cg03014634 | 16 | 85,205,030  | 3.88E-11 | 0.213 | 0.226 |  |  |     |                  |         |
| cg01569082 | 11 | 61,370,871  | 3.38E-13 | 0.213 | 0.193 |  |  |     |                  |         |
| cg03693099 | 9  | 135,936,901 | 4.27E-07 | 0.213 | 0.204 |  |  |     | <i>CEL</i>       | TSS1500 |
| cg10936879 | 10 | 74,397,277  | 0.000521 | 0.213 | 0.207 |  |  |     |                  |         |
| cg07840446 | 4  | 169,690,674 | 3.37E-08 | 0.213 | 0.212 |  |  |     | <i>PALLD</i>     | Body    |



|            |    |             |          |       |       |          |       |     |                  |         |
|------------|----|-------------|----------|-------|-------|----------|-------|-----|------------------|---------|
| cg21205978 | 22 | 36,044,151  | 0.000768 | 0.213 | 0.155 |          |       |     | <i>APOL6</i>     | TSS1500 |
| cg27287254 | 6  | 33,160,067  | 1.2E-05  | 0.213 | 0.183 |          |       |     | <i>COL11A2</i>   | 5'UTR   |
| cg00548824 | 2  | 3,452,407   | 0.000362 | 0.213 | 0.200 |          |       |     | <i>TTC15</i>     | Body    |
| cg10143960 | 1  | 1,109,486   | 1.28E-06 | 0.213 | 0.200 |          |       |     | <i>TLL10</i>     | 5'UTR   |
| cg12492496 | 19 | 18,271,859  | 3.42E-07 | 0.213 | 0.154 |          |       |     | <i>PIK3R2</i>    | Body    |
| cg14432269 | 8  | 67,873,343  | 0.000124 | 0.213 | 0.250 |          |       |     |                  |         |
| cg27428414 | 10 | 99,343,942  | 0.000214 | 0.213 | 0.256 |          |       |     | <i>DHDPSL</i>    | TSS200  |
| cg04010915 | 12 | 110,547,053 | 0.010319 | 0.213 | 0.275 |          |       |     |                  |         |
| cg11220161 | 12 | 117,320,316 | 3.34E-06 | 0.213 | 0.170 |          |       |     | <i>HRK</i>       | TSS1500 |
| cg14865868 | 2  | 12,856,040  | 0.041484 | 0.213 | 0.091 | 2.11E-16 | 0.151 |     | <i>TRIB2</i>     | TSS1500 |
| cg24115032 | 20 | 57,089,953  | 2.71E-05 | 0.213 | 0.197 |          |       |     | <i>APCDD1L</i>   | TSS200  |
| cg12820681 | 7  | 155,166,290 | 0.019123 | 0.213 | 0.210 |          |       |     |                  |         |
| cg15171839 | 5  | 92,924,603  | 5.71E-06 | 0.213 | 0.185 |          |       |     | <i>NR2F1</i>     | Body    |
| cg21959618 | 2  | 100,498,600 | 5.04E-05 | 0.213 | 0.202 |          |       |     | <i>AFF3</i>      | Body    |
| cg06828335 | 10 | 79,238,225  | 4.31E-06 | 0.213 | 0.186 |          |       |     | <i>KCNMA1</i>    | Body    |
| cg09557991 | 1  | 12,227,927  | 3.45E-05 | 0.213 | 0.210 |          |       |     | <i>TNFRSF1B</i>  | Body    |
| cg18631330 | 17 | 79,899,941  | 6.18E-13 | 0.213 | 0.202 |          |       |     | <i>MYADML2</i>   | 5'UTR   |
| cg00859478 | 14 | 60,978,094  | 0.031955 | 0.213 | 0.234 |          |       |     | <i>SIX6</i>      | 3'UTR   |
| cg05726002 | 12 | 115,341,178 | 4.33E-12 | 0.213 | 0.187 |          |       |     |                  |         |
| cg14253517 | 5  | 140,810,726 | 2.55E-05 | 0.213 | 0.221 |          |       |     | <i>PCDHGA4</i>   | Body    |
| cg16197925 | 7  | 121,944,282 | 0.002604 | 0.213 | 0.189 |          |       |     | <i>FEZF1</i>     | 1stExon |
| cg26351776 | 7  | 98,972,156  | 0.022487 | 0.213 | 0.119 |          |       |     | <i>ARPC1B</i>    | TSS200  |
| cg00234625 | 5  | 177,811,648 | 4.24E-05 | 0.213 | 0.215 |          |       |     | <i>COL23A1</i>   | Body    |
| cg02311864 | 6  | 47,215,645  | 2.38E-13 | 0.213 | 0.211 |          |       |     | <i>TNFRSF21</i>  | Body    |
| cg24690094 | 11 | 67,383,802  | 0.000521 | 0.213 | 0.274 |          |       |     |                  |         |
| cg04682133 | 1  | 55,681,841  | 8.19E-08 | 0.213 | 0.179 |          |       |     | <i>USP24</i>     | TSS1500 |
| cg09571082 | 6  | 14,549,941  | 1.45E-09 | 0.213 | 0.187 |          |       |     |                  |         |
| cg23894219 | 1  | 1,356,565   | 8.66E-09 | 0.213 | 0.201 |          |       |     | <i>LOC441869</i> | 1stExon |
| cg26216760 | 12 | 258,365     | 2.13E-08 | 0.213 | 0.192 |          |       | Yes | <i>IQSEC3</i>    | Body    |
| cg27051315 | 2  | 238,864,959 | 0.001852 | 0.213 | 0.219 |          |       |     |                  |         |
| cg27615603 | 16 | 31,213,045  | 3.07E-05 | 0.213 | 0.200 |          |       |     | <i>PYCARD</i>    | Body    |
| cg00614617 | 17 | 8,921,074   | 0.032481 | 0.213 | 0.318 |          |       |     |                  |         |
| cg06392733 | 16 | 85,215,643  | 2.05E-16 | 0.213 | 0.204 |          |       |     |                  |         |
| cg09550809 | 5  | 78,407,562  | 1.96E-07 | 0.213 | 0.212 |          |       |     | <i>BHMT</i>      | TSS200  |

|            |    |             |          |       |       |           |       |  |                  |         |
|------------|----|-------------|----------|-------|-------|-----------|-------|--|------------------|---------|
| cg05484548 | 16 | 29,086,428  | 0.000201 | 0.213 | 0.200 |           |       |  | <i>RRN3P2</i>    | Body    |
| cg01518246 | 11 | 63,870,912  | 3.52E-11 | 0.213 | 0.212 |           |       |  | <i>FLRT1</i>     | TSS1500 |
| cg06166767 | 8  | 41,167,848  | 9.35E-09 | 0.213 | 0.169 | 0.0126121 | 0.035 |  | <i>SFRP1</i>     | TSS1500 |
| cg06675144 | 5  | 127,552,620 | 1.44E-07 | 0.213 | 0.199 |           |       |  |                  |         |
| cg14458815 | 22 | 23,484,001  | 4.25E-15 | 0.213 | 0.196 |           |       |  | <i>RTDR1</i>     | 5'UTR   |
| cg21446511 | 2  | 179,316,481 | 0.016121 | 0.213 | 0.235 |           |       |  | <i>PRKRA</i>     | TSS1500 |
| cg02470690 | 6  | 27,839,548  | 0.043184 | 0.213 | 0.202 |           |       |  |                  |         |
| cg09093931 | 8  | 98,880,926  | 0.002847 | 0.213 | 0.221 |           |       |  | <i>MATN2</i>     | TSS1500 |
| cg15215155 | 7  | 128,473,311 | 2.24E-05 | 0.213 | 0.241 |           |       |  | <i>FLNC</i>      | Body    |
| cg27190385 | 6  | 10,421,865  | 2.96E-05 | 0.213 | 0.215 |           |       |  |                  |         |
| cg16039869 | 11 | 125,260,943 | 0.02728  | 0.213 | 0.225 |           |       |  | <i>PKNOX2</i>    | Body    |
| cg17039369 | 21 | 46,341,006  | 4.86E-05 | 0.213 | 0.209 |           |       |  | <i>ITGB2</i>     | TSS200  |
| cg03045635 | 4  | 9,783,198   | 0.008444 | 0.213 | 0.292 |           |       |  | <i>DRD5</i>      | TSS200  |
| cg06508062 | 21 | 38,063,872  | 0.020442 | 0.213 | 0.250 |           |       |  |                  |         |
| cg24318076 | 17 | 18,091,662  | 3.23E-07 | 0.213 | 0.207 |           |       |  | <i>ALKBH5</i>    | Body    |
| cg02370877 | 8  | 76,316,876  | 1.29E-06 | 0.213 | 0.202 |           |       |  |                  |         |
| cg03266686 | 2  | 47,716,097  | 2.17E-13 | 0.213 | 0.177 |           |       |  |                  |         |
| cg09907170 | 2  | 111,877,177 | 1.07E-05 | 0.213 | 0.209 |           |       |  | <i>BCL2L11</i>   | TSS1500 |
| cg10249734 | 17 | 80,292,079  | 2.02E-14 | 0.213 | 0.184 | 1.05E-15  | 0.146 |  | <i>SECTM1</i>    | TSS200  |
| cg16394290 | 1  | 36,788,416  | 3.69E-06 | 0.213 | 0.209 |           |       |  | <i>FAM176B</i>   | Body    |
| cg00013451 | 8  | 23,711,589  | 0.008741 | 0.213 | 0.112 |           |       |  | <i>STC1</i>      | Body    |
| cg00183886 | 4  | 53,524,296  | 9.42E-10 | 0.213 | 0.207 |           |       |  | <i>USP46</i>     | Body    |
| cg02659568 | 1  | 116,221,763 | 3.64E-09 | 0.213 | 0.206 |           |       |  | <i>VANGL1</i>    | Body    |
| cg03785728 | 20 | 17,674,195  | 0.005833 | 0.213 | 0.220 |           |       |  | <i>BANF2</i>     | TSS200  |
| cg19713947 | 1  | 200,005,635 | 0.002149 | 0.213 | 0.278 |           |       |  | <i>NR5A2</i>     | Body    |
| cg25600933 | 12 | 118,031,023 | 0.0001   | 0.213 | 0.216 |           |       |  | <i>KSR2</i>      | Body    |
| cg26978172 | 6  | 31,696,223  | 4.56E-07 | 0.213 | 0.230 |           |       |  | <i>DDAH2</i>     | Body    |
| cg19223299 | 6  | 100,057,160 | 0.043495 | 0.213 | 0.310 |           |       |  | <i>PRDM13</i>    | Body    |
| cg02433564 | 6  | 37,673,335  | 0.036289 | 0.213 | 0.231 |           |       |  |                  |         |
| cg03553278 | 2  | 177,055,168 | 6.19E-07 | 0.213 | 0.179 |           |       |  | <i>HOXD1</i>     | 3'UTR   |
| cg12108798 | 1  | 1,173,916   | 6.91E-20 | 0.213 | 0.199 |           |       |  |                  |         |
| cg15254238 | 10 | 70,321,874  | 3.47E-05 | 0.213 | 0.206 |           |       |  | <i>TET1</i>      | 5'UTR   |
| cg24026619 | 14 | 59,027,109  | 4.33E-06 | 0.213 | 0.214 |           |       |  |                  |         |
| cg08415853 | 5  | 87,979,005  | 5.73E-05 | 0.213 | 0.248 |           |       |  | <i>LOC645323</i> | Body    |

|            |    |             |          |       |       |          |       |  |                |         |
|------------|----|-------------|----------|-------|-------|----------|-------|--|----------------|---------|
| cg20663364 | 11 | 120,110,627 | 0.016183 | 0.213 | 0.229 |          |       |  | <i>POU2F3</i>  | TSS1500 |
| cg00759329 | 1  | 82,208,723  | 1.72E-06 | 0.213 | 0.154 |          |       |  |                |         |
| cg01373911 | 1  | 6,269,367   | 7.53E-06 | 0.213 | 0.196 |          |       |  | <i>RNF207</i>  | Body    |
| cg02780919 | 11 | 9,026,308   | 7.35E-09 | 0.213 | 0.209 |          |       |  | <i>NRIP3</i>   | TSS1500 |
| cg11950754 | 1  | 53,782,077  | 1.34E-17 | 0.213 | 0.200 |          |       |  | <i>LRP8</i>    | Body    |
| cg14504259 | 9  | 970,882     | 0.006691 | 0.213 | 0.221 |          |       |  |                |         |
| cg27316828 | 10 | 104,436,518 | 0.001071 | 0.213 | 0.220 |          |       |  | <i>ARL3</i>    | 3'UTR   |
| cg04694035 | 7  | 96,647,440  | 0.001992 | 0.213 | 0.240 |          |       |  |                |         |
| cg13596235 | 7  | 99,229,650  | 0.001828 | 0.213 | 0.237 |          |       |  | <i>ZNF498</i>  | 3'UTR   |
| cg14900246 | 2  | 112,655,153 | 2.77E-14 | 0.213 | 0.217 |          |       |  | <i>MERTK</i>   | TSS1500 |
| cg01764559 | 11 | 8,337,383   | 0.001986 | 0.213 | 0.174 |          |       |  |                |         |
| cg10581650 | 10 | 100,155,032 | 2.78E-13 | 0.213 | 0.195 |          |       |  | <i>MIR1287</i> | Body    |
| cg15641162 | 4  | 185,942,800 | 0.002784 | 0.213 | 0.215 |          |       |  |                |         |
| cg00658151 | 1  | 31,368,797  | 1.21E-06 | 0.213 | 0.208 |          |       |  | <i>SDC3</i>    | Body    |
| cg14950829 | 13 | 53,419,617  | 0.008707 | 0.213 | 0.165 |          |       |  | <i>PCDH8</i>   | Body    |
| cg26566898 | 11 | 117,069,891 | 1.97E-15 | 0.213 | 0.217 |          |       |  | <i>TAGLN</i>   | TSS200  |
| cg05389024 | 2  | 170,366,131 | 3.26E-06 | 0.213 | 0.215 | 1.84E-07 | 0.126 |  | <i>KBTBD10</i> | TSS200  |
| cg21069965 | 6  | 25,230,306  | 3.89E-11 | 0.213 | 0.233 |          |       |  |                |         |
| cg14841828 | 14 | 99,729,088  | 0.028282 | 0.213 | 0.208 |          |       |  | <i>BCL11B</i>  | Body    |
| cg18857062 | 6  | 43,276,478  | 0.002337 | 0.213 | 0.178 |          |       |  | <i>CRIP3</i>   | Body    |
| cg08562004 | 17 | 41,008,835  | 2.76E-12 | 0.213 | 0.205 |          |       |  | <i>AOC3</i>    | 3'UTR   |
| cg10943921 | 3  | 129,279,429 | 1.93E-11 | 0.213 | 0.210 |          |       |  | <i>PLXND1</i>  | Body    |
| cg20309640 | 1  | 178,027,432 | 2.55E-05 | 0.213 | 0.219 |          |       |  |                |         |
| cg05155784 | 12 | 110,316,989 | 0.000589 | 0.213 | 0.182 |          |       |  | <i>GLTP</i>    | Body    |
| cg06275853 | 11 | 20,617,937  | 0.011406 | 0.213 | 0.197 |          |       |  |                |         |
| cg21320768 | 13 | 50,070,766  | 1.21E-05 | 0.213 | 0.189 |          |       |  | <i>PHF11</i>   | Body    |
| cg22224597 | 1  | 41,444,871  | 0.001513 | 0.213 | 0.238 |          |       |  | <i>CTPS</i>    | TSS200  |
| cg02804819 | 19 | 49,238,364  | 3.82E-07 | 0.213 | 0.227 |          |       |  | <i>RASIP1</i>  | Body    |
| cg07135660 | 5  | 133,343,843 | 9.26E-10 | 0.213 | 0.201 |          |       |  |                |         |
| cg09076337 | 14 | 81,421,983  | 0.000412 | 0.213 | 0.272 |          |       |  | <i>TSHR</i>    | 5'UTR   |
| cg13782388 | 3  | 126,614,750 | 2.82E-13 | 0.213 | 0.199 |          |       |  | <i>CHCHD6</i>  | Body    |
| cg14989308 | 19 | 17,357,472  | 0.000103 | 0.213 | 0.192 |          |       |  | <i>NR2F6</i>   | TSS1500 |
| cg15418509 | 11 | 71,900,411  | 1.52E-11 | 0.213 | 0.220 |          |       |  | <i>FOLR1</i>   | TSS1500 |
| cg23234149 | 1  | 3,615,561   | 2.4E-07  | 0.213 | 0.204 |          |       |  | <i>TP73</i>    | Body    |

|            |    |             |          |       |       |  |  |  |                  |         |
|------------|----|-------------|----------|-------|-------|--|--|--|------------------|---------|
| cg25588852 | 2  | 216,877,276 | 0.002217 | 0.213 | 0.184 |  |  |  | <i>MREG</i>      | Body    |
| cg11462315 | 2  | 43,455,048  | 0.012239 | 0.213 | 0.103 |  |  |  | <i>ZFP36L2</i>   | TSS1500 |
| cg05825053 | 16 | 11,697,522  | 0.00273  | 0.213 | 0.175 |  |  |  |                  |         |
| cg04018164 | 17 | 12,566,358  | 9.04E-05 | 0.213 | 0.222 |  |  |  |                  |         |
| cg07192961 | 16 | 672,468     | 0.009426 | 0.213 | 0.198 |  |  |  | <i>RAB40C</i>    | Body    |
| cg11245181 | 6  | 149,772,854 | 6.39E-14 | 0.213 | 0.200 |  |  |  | <i>ZC3H12D</i>   | Body    |
| cg15661389 | 17 | 10,018,631  | 0.039624 | 0.213 | 0.238 |  |  |  | <i>GAS7</i>      | Body    |
| cg26870771 | 16 | 67,197,640  | 3.31E-05 | 0.213 | 0.237 |  |  |  | <i>HSF4</i>      | 5'UTR   |
| cg10548163 | 15 | 101,228,329 | 4.25E-09 | 0.213 | 0.224 |  |  |  |                  |         |
| cg18043267 | 10 | 135,170,752 | 8.82E-06 | 0.213 | 0.197 |  |  |  | <i>C10orf125</i> | Body    |
| cg18106366 | 14 | 38,590,628  | 2.33E-06 | 0.213 | 0.228 |  |  |  |                  |         |
| cg24409808 | 10 | 64,957,287  | 0.000381 | 0.213 | 0.185 |  |  |  | <i>JMJD1C</i>    | Body    |
| cg27385729 | 11 | 118,619,582 | 2.26E-16 | 0.213 | 0.204 |  |  |  | <i>DDX6</i>      | 3'UTR   |
| cg00290086 | 9  | 1,050,903   | 1.08E-08 | 0.213 | 0.199 |  |  |  | <i>DMRT2</i>     | 5'UTR   |
| cg00026909 | 1  | 58,089,001  | 0.00032  | 0.213 | 0.156 |  |  |  | <i>DAB1</i>      | 5'UTR   |
| cg02077216 | 5  | 57,753,951  | 0.001252 | 0.213 | 0.239 |  |  |  | <i>PLK2</i>      | Body    |
| cg15010554 | 6  | 122,253,935 | 0.012807 | 0.213 | 0.224 |  |  |  |                  |         |
| cg16190266 | 14 | 38,680,855  | 0.001139 | 0.213 | 0.178 |  |  |  | <i>SSTR1</i>     | 3'UTR   |
| cg20732304 | 13 | 113,752,657 | 2.55E-10 | 0.213 | 0.173 |  |  |  | <i>MCF2L</i>     | 3'UTR   |
| cg22930986 | 3  | 59,171,831  | 5.09E-09 | 0.213 | 0.241 |  |  |  |                  |         |
| cg12136274 | 1  | 146,649,770 | 0.001401 | 0.213 | 0.178 |  |  |  | <i>PDIA3P</i>    | Body    |
| cg18785787 | 1  | 164,750,253 | 2.34E-07 | 0.213 | 0.212 |  |  |  | <i>PBX1</i>      | Body    |
| cg08599355 | 13 | 99,714,609  | 1.01E-09 | 0.213 | 0.212 |  |  |  | <i>DOCK9</i>     | Body    |
| cg11219917 | 4  | 819,151     | 0.004976 | 0.213 | 0.157 |  |  |  | <i>CPLX1</i>     | 5'UTR   |
| cg15768901 | 19 | 41,120,329  | 3.7E-07  | 0.213 | 0.175 |  |  |  | <i>LTBP4</i>     | Body    |
| cg16879806 | 19 | 20,277,919  | 0.005768 | 0.213 | 0.110 |  |  |  | <i>ZNF486</i>    | TSS200  |
| cg17833902 | 1  | 54,143,168  | 2.73E-18 | 0.213 | 0.200 |  |  |  | <i>GLIS1</i>     | 5'UTR   |
| cg20071670 | 11 | 73,661,895  | 0.00091  | 0.213 | 0.271 |  |  |  | <i>DNAJB13</i>   | 1stExon |
| cg13698196 | 12 | 52,257,893  | 0.022919 | 0.213 | 0.259 |  |  |  |                  |         |
| cg01323777 | 17 | 7,832,943   | 6.54E-07 | 0.213 | 0.193 |  |  |  | <i>KCNAB3</i>    | TSS200  |
| cg13347970 | 6  | 137,809,630 | 0.001571 | 0.213 | 0.255 |  |  |  |                  |         |
| cg25536787 | 17 | 26,221,167  | 0.002428 | 0.213 | 0.238 |  |  |  | <i>C17orf108</i> | TSS1500 |
| cg03345805 | 2  | 191,208,171 | 0.002801 | 0.213 | 0.130 |  |  |  | <i>INPP1</i>     | TSS200  |
| cg05418333 | 7  | 101,556,183 | 1.41E-08 | 0.213 | 0.190 |  |  |  | <i>CUX1</i>      | Body    |

|            |    |             |          |       |       |            |       |  |                |         |
|------------|----|-------------|----------|-------|-------|------------|-------|--|----------------|---------|
| cg05647733 | 12 | 106,474,322 | 2.7E-05  | 0.213 | 0.156 |            |       |  | <i>NUAK1</i>   | Body    |
| cg05870586 | 2  | 240,196,769 | 1.33E-06 | 0.213 | 0.194 |            |       |  | <i>HDAC4</i>   | Body    |
| cg10521480 | 1  | 182,721,424 | 0.000643 | 0.213 | 0.209 |            |       |  |                |         |
| cg16632159 | 10 | 7,466,434   | 1.53E-11 | 0.213 | 0.198 |            |       |  |                |         |
| cg26666835 | 5  | 170,742,118 | 0.001238 | 0.213 | 0.239 |            |       |  |                |         |
| cg09252806 | 10 | 131,669,630 | 0.04185  | 0.213 | 0.040 |            |       |  | <i>EBF3</i>    | Body    |
| cg05040232 | 3  | 194,117,403 | 2.4E-05  | 0.213 | 0.194 |            |       |  | <i>GP5</i>     | Body    |
| cg03420242 | 16 | 49,893,122  | 0.007416 | 0.213 | 0.267 |            |       |  |                |         |
| cg04854285 | X  | 102,531,822 | 0.000939 | 0.213 | 0.235 |            |       |  | <i>TCEAL5</i>  | TSS200  |
| cg08071700 | 16 | 81,579,244  | 4.45E-07 | 0.213 | 0.196 |            |       |  | <i>CMIP</i>    | Body    |
| cg25602692 | 12 | 123,998,085 | 8.18E-07 | 0.213 | 0.213 |            |       |  | <i>RILPL1</i>  | Body    |
| cg03137522 | 6  | 117,087,083 | 0.001152 | 0.213 | 0.153 |            |       |  | <i>FAM162B</i> | TSS200  |
| cg11100804 | 5  | 140,783,173 | 6.56E-06 | 0.213 | 0.146 |            |       |  | <i>PCDHGA4</i> | Body    |
| cg16456252 | 6  | 28,483,537  | 0.000184 | 0.213 | 0.228 |            |       |  | <i>GPX6</i>    | 1stExon |
| cg22500555 | 3  | 159,756,996 | 0.026282 | 0.213 | 0.201 |            |       |  |                |         |
| cg24292612 | 8  | 6,735,472   | 0.000107 | 0.213 | 0.166 | 4.47E-23   | 0.169 |  | <i>DEFB1</i>   | 5'UTR   |
| cg13982505 | 2  | 233,642,094 | 1.49E-06 | 0.213 | 0.218 | 0.00024306 | 0.100 |  | <i>GIGYF2</i>  | Body    |
| cg20275132 | 6  | 28,367,749  | 0.01949  | 0.213 | 0.212 |            |       |  | <i>ZSCAN12</i> | TSS1500 |
| cg03281139 | 19 | 3,451,135   | 4.26E-05 | 0.213 | 0.239 |            |       |  | <i>NFIC</i>    | Body    |
| cg15919258 | 14 | 90,849,921  | 0.004347 | 0.213 | 0.169 |            |       |  |                |         |
| cg24387380 | 15 | 27,159,158  | 3.54E-12 | 0.213 | 0.161 |            |       |  | <i>GABRA5</i>  | Body    |
| cg01166925 | 4  | 41,880,280  | 6.02E-11 | 0.213 | 0.204 |            |       |  |                |         |
| cg04551776 | 5  | 393,366     | 3.45E-06 | 0.213 | 0.193 |            |       |  | <i>AHRR</i>    | Body    |
| cg13818276 | 22 | 32,437,865  | 3.16E-11 | 0.213 | 0.191 |            |       |  | <i>SLC5A1</i>  | TSS1500 |
| cg01473837 | 12 | 54,409,321  | 0.041968 | 0.213 | 0.204 |            |       |  | <i>HOXC4</i>   | TSS1500 |
| cg02900766 | 15 | 58,357,319  | 0.000285 | 0.213 | 0.185 |            |       |  | <i>ALDH1A2</i> | Body    |
| cg05371578 | 3  | 147,128,157 | 0.001257 | 0.213 | 0.205 |            |       |  | <i>ZIC1</i>    | 1stExon |
| cg06023941 | 5  | 53,187,565  | 3.32E-16 | 0.213 | 0.191 |            |       |  | <i>ARL15</i>   | Body    |
| cg22970003 | 7  | 157,406,032 | 8.51E-07 | 0.213 | 0.198 |            |       |  | <i>PTPRN2</i>  | Body    |
| cg00280609 | 1  | 45,250,840  | 3.54E-05 | 0.213 | 0.220 |            |       |  | <i>BEST4</i>   | Body    |
| cg27455017 | 7  | 150,037,988 | 0.000616 | 0.213 | 0.147 |            |       |  | <i>RARRES2</i> | 5'UTR   |
| cg05760722 | 12 | 52,115,238  | 0.010774 | 0.213 | 0.243 |            |       |  | <i>SCN8A</i>   | Body    |
| cg05826295 | 6  | 113,886,340 | 0.000765 | 0.213 | 0.206 |            |       |  |                |         |
| cg13394491 | 5  | 15,737,401  | 1.41E-06 | 0.213 | 0.217 |            |       |  | <i>FBXL7</i>   | Body    |

|            |    |             |          |       |       |          |       |     |                 |         |
|------------|----|-------------|----------|-------|-------|----------|-------|-----|-----------------|---------|
| cg07650392 | 3  | 64,127,184  | 0.004271 | 0.212 | 0.230 |          |       | Yes | <i>PRICKLE2</i> | Body    |
| cg09644153 | 16 | 3,345,646   | 1.17E-07 | 0.212 | 0.185 |          |       |     |                 |         |
| cg15855170 | 11 | 116,574,279 | 0.020666 | 0.212 | 0.194 |          |       |     |                 |         |
| cg16967003 | 7  | 1,293,599   | 5.11E-06 | 0.212 | 0.215 |          |       |     |                 |         |
| cg12425861 | 14 | 105,830,606 | 0.023872 | 0.212 | 0.102 |          |       |     | <i>PACS2</i>    | Body    |
| cg19385628 | 3  | 6,904,640   | 0.021352 | 0.212 | 0.071 |          |       |     | <i>GRM7</i>     | Body    |
| cg00194277 | 7  | 30,795,751  | 8.69E-07 | 0.212 | 0.221 |          |       |     | <i>INMT</i>     | 3'UTR   |
| cg17402060 | 12 | 81,108,011  | 6.32E-13 | 0.212 | 0.214 |          |       |     |                 |         |
| cg07871202 | 3  | 42,306,580  | 0.014462 | 0.212 | 0.235 |          |       |     | <i>CCK</i>      | TSS200  |
| cg13998093 | 17 | 44,896,877  | 0.000267 | 0.212 | 0.221 |          |       |     | <i>WNT3</i>     | TSS1500 |
| cg22798707 | 9  | 23,822,666  | 0.031629 | 0.212 | 0.152 |          |       |     | <i>ELAVL2</i>   | TSS1500 |
| cg26980529 | 2  | 109,882,934 | 3.49E-07 | 0.212 | 0.231 |          |       |     | <i>SH3RF3</i>   | Body    |
| cg07140894 | 16 | 5,020,147   | 0.002602 | 0.212 | 0.241 |          |       |     | <i>SEC14L5</i>  | Body    |
| cg07283407 | X  | 133,679,994 | 3.38E-05 | 0.212 | 0.188 |          |       |     | <i>MGC16121</i> | Body    |
| cg15514896 | 1  | 229,074,115 | 2.9E-06  | 0.212 | 0.222 |          |       |     |                 |         |
| cg17362052 | 4  | 107,955,762 | 0.039813 | 0.212 | 0.066 |          |       |     | <i>DKK2</i>     | Body    |
| cg19030579 | 1  | 50,888,710  | 0.031831 | 0.212 | 0.286 |          |       |     | <i>DMRTA2</i>   | 5'UTR   |
| cg25674938 | 19 | 1,360,981   | 0.000131 | 0.212 | 0.236 |          |       |     | <i>MUM1</i>     | Body    |
| cg26328335 | 12 | 50,354,840  | 2.05E-07 | 0.212 | 0.192 |          |       |     | <i>AQP5</i>     | TSS1500 |
| cg27391627 | 16 | 86,704,130  | 1.77E-07 | 0.212 | 0.197 |          |       |     |                 |         |
| cg04971779 | 6  | 44,190,729  | 1.77E-08 | 0.212 | 0.183 |          |       |     | <i>SLC29A1</i>  | 5'UTR   |
| cg13456470 | 9  | 98,266,766  | 1.34E-09 | 0.212 | 0.238 |          |       |     | <i>PTCH1</i>    | 5'UTR   |
| cg21747160 | 12 | 49,504,981  | 0.001475 | 0.212 | 0.199 |          |       |     | <i>LMBR1L</i>   | TSS1500 |
| cg01087977 | 2  | 220,150,857 | 4.4E-09  | 0.212 | 0.220 |          |       |     | <i>DNAJB2</i>   | 3'UTR   |
| cg06177306 | 2  | 133,927,261 | 1.09E-08 | 0.212 | 0.205 |          |       |     | <i>NCKAP5</i>   | Body    |
| cg13235787 | 12 | 117,100,516 | 1.06E-05 | 0.212 | 0.145 |          |       | Yes |                 |         |
| cg20163033 | 4  | 2,627,194   | 4.81E-16 | 0.212 | 0.201 | 3.15E-10 | 0.133 |     | <i>FAM193A</i>  | 1stExon |
| cg24536349 | 8  | 143,781,340 | 1.2E-10  | 0.212 | 0.209 |          |       |     | <i>LY6K</i>     | TSS200  |
| cg25372296 | 1  | 98,510,328  | 0.00358  | 0.212 | 0.169 |          |       |     |                 |         |
| cg11691093 | 22 | 36,727,373  | 0.002444 | 0.212 | 0.275 |          |       |     | <i>MYH9</i>     | Body    |
| cg17371334 | 11 | 134,341,419 | 1.54E-09 | 0.212 | 0.201 |          |       |     |                 |         |
| cg02312904 | 17 | 59,234,870  | 0.000425 | 0.212 | 0.216 |          |       |     | <i>BCAS3</i>    | Body    |
| cg09122387 | 10 | 98,855,762  | 1.29E-07 | 0.212 | 0.238 |          |       |     | <i>SLIT1</i>    | Body    |
| cg05262549 | 1  | 183,256,588 | 9.4E-06  | 0.212 | 0.242 |          |       |     | <i>NMNAT2</i>   | Body    |

|            |    |             |          |       |       |          |       |     |                 |         |
|------------|----|-------------|----------|-------|-------|----------|-------|-----|-----------------|---------|
| cg00017826 | 2  | 30,644,955  | 3.17E-09 | 0.212 | 0.217 |          |       |     |                 |         |
| cg13160874 | 2  | 242,549,431 | 0.002159 | 0.212 | 0.206 |          |       |     | <i>THAP4</i>    | Body    |
| cg26834680 | 1  | 111,814,208 | 0.004066 | 0.212 | 0.241 |          |       |     |                 |         |
| cg05389555 | 1  | 6,659,504   | 0.000502 | 0.212 | 0.212 |          |       |     | <i>KLHL21</i>   | Body    |
| cg05891054 | 17 | 40,380,254  | 7.17E-09 | 0.212 | 0.218 |          |       |     | <i>STAT5B</i>   | Body    |
| cg17844718 | 6  | 32,280,834  | 9.52E-10 | 0.212 | 0.194 |          |       |     | <i>C6orf10</i>  | Body    |
| cg03369269 | 13 | 25,745,946  | 0.037795 | 0.212 | 0.073 |          |       |     | <i>FAM123A</i>  | TSS200  |
| cg16535018 | 17 | 36,829,606  | 0.004838 | 0.212 | 0.259 |          |       |     | <i>C17orf96</i> | 1stExon |
| cg21650962 | 6  | 50,794,057  | 0.012841 | 0.212 | 0.254 |          |       |     | <i>TFAP2B</i>   | Body    |
| cg23362669 | 2  | 106,776,913 | 0.000243 | 0.212 | 0.219 |          |       |     | <i>UXS1</i>     | Body    |
| cg12744820 | 6  | 137,814,960 | 0.003631 | 0.212 | 0.202 |          |       |     | <i>OLIG3</i>    | 1stExon |
| cg06973667 | 10 | 71,332,139  | 6.75E-07 | 0.212 | 0.189 |          |       |     | <i>NEUROG3</i>  | 3'UTR   |
| cg09415955 | 1  | 10,709,885  | 5.29E-16 | 0.212 | 0.225 |          |       |     | <i>CASZ1</i>    | Body    |
| cg13834844 | 10 | 102,415,320 | 0.047365 | 0.212 | 0.235 |          |       |     |                 |         |
| cg03185144 | 16 | 85,106,490  | 4.51E-15 | 0.212 | 0.199 |          |       |     | <i>KIAA0513</i> | Body    |
| cg03301200 | 8  | 99,954,557  | 5.45E-09 | 0.212 | 0.202 |          |       |     |                 |         |
| cg12964697 | 7  | 2,140,231   | 1.32E-11 | 0.212 | 0.206 |          |       |     | <i>MAD1L1</i>   | Body    |
| cg21516044 | 4  | 166,304,596 | 2.66E-13 | 0.212 | 0.209 |          |       |     | <i>CPE</i>      | Body    |
| cg21906379 | X  | 109,936,239 | 0.00102  | 0.212 | 0.217 |          |       |     | <i>CHRDL1</i>   | Body    |
| cg22976218 | 2  | 182,544,321 | 0.04006  | 0.212 | 0.249 |          |       |     | <i>NEUROD1</i>  | 5'UTR   |
| cg11817899 | 10 | 108,923,111 | 0.03948  | 0.212 | 0.157 |          |       |     | <i>SORCS1</i>   | Body    |
| cg22779972 | 12 | 3,207,241   | 5.27E-09 | 0.212 | 0.194 |          |       |     | <i>TSPAN9</i>   | 5'UTR   |
| cg11891925 | 10 | 13,091,949  | 0.00074  | 0.212 | 0.230 |          |       |     |                 |         |
| cg18685879 | 3  | 141,012,746 | 1.47E-05 | 0.212 | 0.243 |          |       |     | <i>ACPL2</i>    | 3'UTR   |
| cg20184238 | 17 | 43,046,859  | 1.04E-07 | 0.212 | 0.202 |          |       |     | <i>C1QL1</i>    | TSS1500 |
| cg09430445 | 3  | 42,918,546  | 1.26E-05 | 0.212 | 0.215 |          |       |     | <i>CYP8B1</i>   | TSS1500 |
| cg15440688 | 14 | 95,237,637  | 5.54E-06 | 0.212 | 0.228 |          |       |     | <i>GSC</i>      | TSS1500 |
| cg20860726 | 2  | 1,820,169   | 3.26E-11 | 0.212 | 0.178 |          |       |     | <i>MYT1L</i>    | Body    |
| cg00250430 | 9  | 1,051,579   | 0.002732 | 0.212 | 0.163 | 8.52E-14 | 0.148 |     | <i>DMRT2</i>    | 5'UTR   |
| cg02331649 | 3  | 52,926,322  | 3.14E-06 | 0.212 | 0.209 |          |       |     | <i>TMEM110</i>  | Body    |
| cg08231493 | 8  | 17,271,093  | 0.010213 | 0.212 | 0.180 |          |       | Yes | <i>MTMR7</i>    | TSS200  |
| cg21174841 | 9  | 100,617,999 | 0.017259 | 0.212 | 0.245 |          |       |     | <i>FOXE1</i>    | 3'UTR   |
| cg05205813 | 10 | 18,549,413  | 2E-10    | 0.212 | 0.199 |          |       |     | <i>CACNB2</i>   | Body    |
| cg07707031 | 17 | 79,504,142  | 2.88E-05 | 0.212 | 0.236 |          |       |     | <i>FSCN2</i>    | 3'UTR   |

|            |    |             |          |       |       |          |       |  |                 |         |
|------------|----|-------------|----------|-------|-------|----------|-------|--|-----------------|---------|
| cg09254322 | 10 | 101,280,807 | 5.84E-05 | 0.212 | 0.202 |          |       |  |                 |         |
| cg21854895 | 17 | 71,305,638  | 1.64E-08 | 0.212 | 0.213 |          |       |  | <i>CDC42EP4</i> | 5'UTR   |
| cg21501064 | X  | 118,827,889 | 8.63E-07 | 0.212 | 0.182 | 7.59E-20 | 0.128 |  | <i>SEPT6</i>    | TSS1500 |
| cg08573435 | 7  | 1,398,116   | 0.005882 | 0.212 | 0.237 |          |       |  |                 |         |
| cg21768287 | X  | 150,068,356 | 0.001062 | 0.212 | 0.115 |          |       |  | <i>CD99L2</i>   | TSS1500 |
| cg09080114 | 12 | 6,983,111   | 0.019928 | 0.212 | 0.214 |          |       |  | <i>SPSB2</i>    | TSS1500 |
| cg09013655 | 1  | 184,005,063 | 1.6E-06  | 0.212 | 0.158 |          |       |  | <i>GLT25D2</i>  | Body    |
| cg10493506 | 2  | 230,340,591 | 0.000311 | 0.212 | 0.139 |          |       |  | <i>DNER</i>     | Body    |
| cg03103919 | 10 | 18,629,674  | 0.010412 | 0.212 | 0.165 |          |       |  | <i>CACNB2</i>   | Body    |
| cg27114644 | 2  | 121,344,729 | 2.95E-57 | 0.212 | 0.193 |          |       |  |                 |         |
| cg09951047 | 9  | 97,848,306  | 2.72E-05 | 0.212 | 0.182 |          |       |  | <i>C9orf3</i>   | 3'UTR   |
| cg04944853 | 3  | 139,252,106 | 1.5E-10  | 0.212 | 0.204 |          |       |  | <i>RBP1</i>     | Body    |
| cg19738463 | 6  | 31,831,574  | 0.037068 | 0.212 | 0.198 |          |       |  | <i>NEU1</i>     | TSS1500 |
| cg26444282 | 5  | 149,980,674 | 7.38E-06 | 0.212 | 0.218 |          |       |  | <i>SYNPO</i>    | 1stExon |
| cg09137301 | 7  | 150,026,998 | 6.06E-14 | 0.212 | 0.207 |          |       |  | <i>C7orf29</i>  | 5'UTR   |
| cg26351479 | X  | 125,686,936 | 0.035338 | 0.212 | 0.147 |          |       |  | <i>DCAF12L1</i> | TSS200  |
| cg07397616 | 22 | 38,035,109  | 2.21E-16 | 0.212 | 0.201 |          |       |  | <i>SH3BP1</i>   | TSS1500 |
| cg16153168 | 5  | 68,114,337  | 2.35E-10 | 0.212 | 0.209 |          |       |  |                 |         |
| cg04026492 | 9  | 139,024,611 | 0.003871 | 0.212 | 0.203 |          |       |  |                 |         |
| cg01230325 | 9  | 96,108,319  | 1.33E-07 | 0.212 | 0.208 |          |       |  | <i>C9orf129</i> | 5'UTR   |
| cg05860111 | 5  | 14,441,261  | 0.000647 | 0.212 | 0.173 |          |       |  | <i>TRIO</i>     | Body    |
| cg13408344 | 15 | 31,631,240  | 0.010195 | 0.212 | 0.096 |          |       |  | <i>KLF13</i>    | Body    |
| cg01464985 | 2  | 27,805,622  | 0.000477 | 0.212 | 0.181 | 2.02E-22 | 0.150 |  | <i>ZNF512</i>   | TSS1500 |
| cg03979024 | 10 | 419,189     | 7.05E-08 | 0.212 | 0.222 |          |       |  | <i>DIP2C</i>    | Body    |
| cg04679902 | 22 | 19,752,869  | 4.93E-08 | 0.212 | 0.192 |          |       |  | <i>TBX1</i>     | Body    |
| cg11511795 | 4  | 10,463,749  | 0.001759 | 0.212 | 0.202 |          |       |  |                 |         |
| cg03302008 | 2  | 96,012,735  | 0.000392 | 0.212 | 0.190 |          |       |  | <i>KCNIP3</i>   | TSS200  |
| cg27200895 | 4  | 7,763,703   | 4.85E-06 | 0.212 | 0.214 |          |       |  | <i>AFAP1</i>    | 3'UTR   |
| cg00400832 | 7  | 96,650,323  | 7.44E-06 | 0.212 | 0.213 |          |       |  | <i>DLX5</i>     | Body    |
| cg01540102 | 16 | 57,506,038  | 5.85E-17 | 0.212 | 0.212 |          |       |  | <i>DOK4</i>     | 3'UTR   |
| cg08498156 | 6  | 30,095,802  | 0.001109 | 0.212 | 0.315 |          |       |  |                 |         |
| cg09678539 | 2  | 27,298,343  | 2.34E-06 | 0.212 | 0.201 |          |       |  |                 |         |
| cg12141659 | 11 | 2,847,462   | 6.37E-05 | 0.212 | 0.182 |          |       |  | <i>KCNQ1</i>    | Body    |
| cg13009111 | 11 | 71,350,975  | 0.025868 | 0.212 | 0.106 |          |       |  |                 |         |



|            |    |             |          |       |       |          |       |  |                  |         |
|------------|----|-------------|----------|-------|-------|----------|-------|--|------------------|---------|
| cg05045981 | 7  | 129,418,470 | 6.37E-05 | 0.212 | 0.157 |          |       |  |                  |         |
| cg09830455 | 11 | 70,886,197  | 1.37E-11 | 0.212 | 0.202 |          |       |  | <i>SHANK2</i>    | 5'UTR   |
| cg14254080 | 2  | 85,106,954  | 0.000372 | 0.212 | 0.213 |          |       |  | <i>C2orf89</i>   | Body    |
| cg18624900 | 10 | 91,295,643  | 0.018709 | 0.212 | 0.218 |          |       |  | <i>SLC16A12</i>  | TSS1500 |
| cg05128520 | 16 | 84,676,746  | 0.006441 | 0.212 | 0.280 |          |       |  |                  |         |
| cg09785033 | 11 | 2,336,066   | 1.11E-10 | 0.212 | 0.178 |          |       |  | <i>TSPAN32</i>   | Body    |
| cg04963697 | 16 | 3,570,555   | 1.27E-11 | 0.212 | 0.214 |          |       |  | <i>CLUAP1</i>    | Body    |
| cg09266602 | 8  | 49,469,775  | 4.41E-05 | 0.212 | 0.214 |          |       |  |                  |         |
| cg19419246 | 19 | 45,950,425  | 3.89E-12 | 0.212 | 0.202 |          |       |  |                  |         |
| cg11118422 | 6  | 28,557,883  | 7.49E-07 | 0.212 | 0.211 |          |       |  |                  |         |
| cg17588373 | X  | 13,957,417  | 5.08E-08 | 0.212 | 0.180 |          |       |  | <i>GPM6B</i>     | TSS1500 |
| cg24207176 | 4  | 89,079,587  | 0.018689 | 0.212 | 0.148 | 2.15E-16 | 0.159 |  | <i>ABCG2</i>     | 1stExon |
| cg00747944 | 16 | 54,972,845  | 0.000205 | 0.212 | 0.205 |          |       |  |                  |         |
| cg12404831 | 2  | 192,114,017 | 0.000308 | 0.212 | 0.212 |          |       |  | <i>MYO1B</i>     | 5'UTR   |
| cg19853936 | 6  | 19,692,304  | 0.000266 | 0.212 | 0.231 |          |       |  |                  |         |
| cg13375589 | 17 | 4,487,125   | 0.040729 | 0.212 | 0.218 |          |       |  | <i>SMTNL2</i>    | TSS200  |
| cg21493727 | 8  | 127,938,624 | 8.99E-05 | 0.212 | 0.215 |          |       |  |                  |         |
| cg00481644 | 15 | 89,921,158  | 2.85E-05 | 0.212 | 0.178 |          |       |  | <i>LOC254559</i> | TSS200  |
| cg02730865 | 16 | 80,972,238  | 9.59E-12 | 0.212 | 0.213 |          |       |  |                  |         |
| cg06703222 | 16 | 69,598,327  | 2.18E-06 | 0.212 | 0.193 |          |       |  | <i>NFAT5</i>     | TSS1500 |
| cg12727256 | 22 | 24,838,292  | 8.76E-06 | 0.212 | 0.209 |          |       |  | <i>C22orf45</i>  | Body    |
| cg00539581 | 5  | 66,477,808  | 0.00104  | 0.212 | 0.211 |          |       |  |                  |         |
| cg02338778 | 2  | 23,840,763  | 2.35E-05 | 0.212 | 0.229 |          |       |  | <i>KLHL29</i>    | Body    |
| cg12559197 | 5  | 76,654,783  | 4.82E-06 | 0.212 | 0.206 |          |       |  | <i>PDE8B</i>     | Body    |
| cg17563034 | 4  | 5,021,268   | 4.58E-05 | 0.212 | 0.195 |          |       |  | <i>CYTL1</i>     | TSS200  |
| cg00609135 | 6  | 26,614,014  | 0.000844 | 0.212 | 0.197 |          |       |  |                  |         |
| cg07693270 | 3  | 186,856,928 | 0.005117 | 0.212 | 0.132 | 7.8E-24  | 0.165 |  | <i>RPL39L</i>    | 5'UTR   |
| cg11789804 | 1  | 219,958,132 | 1.54E-05 | 0.212 | 0.221 |          |       |  |                  |         |
| cg14314744 | 6  | 100,897,445 | 0.009896 | 0.212 | 0.204 |          |       |  | <i>SIM1</i>      | Body    |
| cg16045823 | 7  | 73,295,154  | 6.01E-14 | 0.212 | 0.193 |          |       |  |                  |         |
| cg16845136 | 22 | 46,774,204  | 2.94E-07 | 0.212 | 0.209 |          |       |  | <i>CELSR1</i>    | Body    |
| cg18188653 | 3  | 188,296,976 | 1.2E-06  | 0.212 | 0.184 |          |       |  | <i>LPP</i>       | Body    |
| cg08507952 | 3  | 193,750,969 | 0.002833 | 0.212 | 0.250 |          |       |  |                  |         |
| cg11126767 | 14 | 60,978,275  | 6.43E-06 | 0.212 | 0.195 |          |       |  | <i>SIX6</i>      | 3'UTR   |

|            |    |             |          |       |       |          |       |  |                     |         |
|------------|----|-------------|----------|-------|-------|----------|-------|--|---------------------|---------|
| cg17071957 | 9  | 124,029,926 | 3.45E-05 | 0.212 | 0.106 | 2.59E-08 | 0.102 |  | <i>GSN</i>          | TSS1500 |
| cg24983862 | 17 | 65,242,497  | 0.014261 | 0.212 | 0.144 |          |       |  | <i>HELZ</i>         | TSS1500 |
| cg25262528 | 6  | 86,158,972  | 0.016112 | 0.212 | 0.130 |          |       |  | <i>NT5E</i>         | TSS1500 |
| cg26157386 | 14 | 36,994,270  | 0.031349 | 0.212 | 0.190 |          |       |  |                     |         |
| cg05600126 | 17 | 950,540     | 2.06E-10 | 0.212 | 0.213 |          |       |  | <i>ABR</i>          | Body    |
| cg07186576 | 10 | 31,072,771  | 1.93E-05 | 0.212 | 0.151 |          |       |  |                     |         |
| cg10667895 | 2  | 102,577,876 | 1.58E-11 | 0.212 | 0.207 |          |       |  |                     |         |
| cg11412418 | 5  | 172,658,730 | 0.032048 | 0.212 | 0.316 |          |       |  |                     |         |
| cg03085719 | 11 | 3,860,569   | 4.15E-07 | 0.212 | 0.191 |          |       |  | <i>RHOG</i>         | 5'UTR   |
| cg06854772 | 4  | 1,853,351   | 1.87E-23 | 0.212 | 0.221 |          |       |  | <i>LETM1</i>        | Body    |
| cg15323638 | 7  | 131,229,865 | 1.95E-08 | 0.212 | 0.207 |          |       |  | <i>PODXL</i>        | Body    |
| cg02046552 | 8  | 21,914,287  | 7.43E-09 | 0.212 | 0.194 |          |       |  | <i>EPB49</i>        | TSS1500 |
| cg02787917 | 2  | 175,190,821 | 0.007236 | 0.212 | 0.131 |          |       |  |                     |         |
| cg10857774 | 19 | 46,286,683  | 8.66E-10 | 0.212 | 0.219 | 4.79E-35 | 0.125 |  | <i>DMPK</i>         | TSS1500 |
| cg18172877 | 5  | 1,878,672   | 9.17E-08 | 0.212 | 0.209 |          |       |  | <i>IRX4</i>         | Body    |
| cg01960096 | 1  | 157,012,966 | 8.31E-09 | 0.212 | 0.195 |          |       |  | <i>ARHGEF11</i>     | Body    |
| cg03846767 | 1  | 3,607,292   | 3.44E-05 | 0.212 | 0.204 | 6.42E-17 | 0.204 |  | <i>TP73</i>         | 1stExon |
| cg04557197 | 17 | 77,764,992  | 0.003606 | 0.212 | 0.187 |          |       |  |                     |         |
| cg19088141 | 1  | 113,056,151 | 0.000413 | 0.212 | 0.199 |          |       |  | <i>WNT2B</i>        | Body    |
| cg26843711 | 5  | 140,753,449 | 0.003532 | 0.212 | 0.231 |          |       |  | <i>PCDHGA4</i>      | Body    |
| cg16254756 | 1  | 154,943,676 | 3.2E-05  | 0.212 | 0.228 |          |       |  | <i>SHC1</i>         | 5'UTR   |
| cg19255477 | 1  | 151,810,586 | 0.000121 | 0.212 | 0.198 |          |       |  | <i>LOC100132111</i> | TSS1500 |
| cg27297315 | 2  | 23,704,185  | 4.57E-08 | 0.212 | 0.202 |          |       |  | <i>KLHL29</i>       | 5'UTR   |
| cg01460202 | 16 | 23,706,506  | 0.000236 | 0.212 | 0.236 |          |       |  | <i>ERN2</i>         | Body    |
| cg19118951 | 21 | 35,575,070  | 6.56E-14 | 0.212 | 0.200 |          |       |  |                     |         |
| cg00350296 | 11 | 66,084,841  | 4.43E-05 | 0.212 | 0.206 | 2.79E-10 | 0.125 |  | <i>CD248</i>        | TSS1500 |
| cg06247406 | 6  | 101,846,791 | 6.09E-06 | 0.212 | 0.185 |          |       |  | <i>GRIK2</i>        | TSS200  |
| cg11067786 | 2  | 74,780,467  | 5.5E-16  | 0.212 | 0.224 |          |       |  | <i>LOXL3</i>        | 5'UTR   |
| cg14029759 | 6  | 5,764,816   | 1.76E-10 | 0.212 | 0.196 |          |       |  | <i>FARS2</i>        | Body    |
| cg16792363 | 16 | 14,499,735  | 0.002929 | 0.212 | 0.228 |          |       |  |                     |         |
| cg20313873 | 10 | 101,436,820 | 3.36E-07 | 0.212 | 0.184 |          |       |  | <i>ENTPD7</i>       | Body    |
| cg23206461 | 1  | 147,782,116 | 0.000842 | 0.212 | 0.252 |          |       |  |                     |         |
| cg24683185 | 15 | 31,214,501  | 4.66E-16 | 0.212 | 0.209 |          |       |  | <i>MTMR15</i>       | Body    |
| cg01378515 | 3  | 124,773,106 | 5.09E-09 | 0.212 | 0.205 |          |       |  | <i>HEG1</i>         | Body    |

|            |    |             |          |       |       |  |  |     |                 |         |
|------------|----|-------------|----------|-------|-------|--|--|-----|-----------------|---------|
| cg26585452 | 13 | 50,702,914  | 1.39E-06 | 0.212 | 0.199 |  |  |     |                 |         |
| cg02193762 | 11 | 36,399,139  | 0.005985 | 0.212 | 0.150 |  |  |     | <i>PRR5L</i>    | 5'UTR   |
| cg02805871 | 17 | 6,939,695   | 0.004682 | 0.212 | 0.094 |  |  |     | <i>SLC16A13</i> | 5'UTR   |
| cg02860240 | 3  | 169,530,621 | 0.00858  | 0.212 | 0.186 |  |  |     | <i>LRR34</i>    | TSS1500 |
| cg04043571 | 9  | 127,265,989 | 0.000106 | 0.212 | 0.210 |  |  |     | <i>NR5A1</i>    | 5'UTR   |
| cg04654530 | 2  | 63,282,702  | 2.99E-05 | 0.212 | 0.209 |  |  |     | <i>OTX1</i>     | Body    |
| cg15905200 | 17 | 29,013,706  | 1.95E-09 | 0.212 | 0.196 |  |  |     |                 |         |
| cg24593138 | 1  | 19,687,988  | 1.57E-06 | 0.212 | 0.192 |  |  |     | <i>CAPZB</i>    | Body    |
| cg26794871 | 20 | 44,934,712  | 0.000278 | 0.212 | 0.187 |  |  |     |                 |         |
| cg01025774 | 5  | 42,944,457  | 2.16E-05 | 0.212 | 0.180 |  |  |     |                 |         |
| cg02251393 | 2  | 159,651,559 | 1.03E-08 | 0.212 | 0.228 |  |  |     | <i>DAPL1</i>    | TSS1500 |
| cg11268739 | 14 | 48,145,588  | 0.017408 | 0.212 | 0.265 |  |  |     |                 |         |
| cg03531247 | 2  | 50,573,485  | 0.003044 | 0.212 | 0.227 |  |  |     | <i>NRXN1</i>    | Body    |
| cg11582717 | 17 | 63,452,460  | 3.24E-09 | 0.212 | 0.183 |  |  |     |                 |         |
| cg00661523 | 3  | 151,985,426 | 6.41E-08 | 0.212 | 0.206 |  |  |     | <i>MBNL1</i>    | TSS1500 |
| cg00735023 | 11 | 58,830,355  | 0.000281 | 0.212 | 0.187 |  |  |     |                 |         |
| cg06342195 | 17 | 36,734,475  | 6.01E-06 | 0.212 | 0.195 |  |  |     | <i>SRCIN1</i>   | Body    |
| cg10142520 | 11 | 65,344,604  | 2.65E-11 | 0.212 | 0.205 |  |  |     | <i>EHBP1L1</i>  | Body    |
| cg14372324 | 20 | 30,347,798  | 0.001348 | 0.212 | 0.161 |  |  | Yes | <i>TPX2</i>     | Body    |
| cg08725840 | 11 | 89,224,774  | 0.022992 | 0.212 | 0.228 |  |  |     | <i>NOX4</i>     | 5'UTR   |
| cg09250933 | 2  | 114,035,619 | 4.88E-05 | 0.212 | 0.205 |  |  |     | <i>PAX8</i>     | Body    |
| cg12604331 | 1  | 156,906,485 | 6.12E-08 | 0.212 | 0.224 |  |  |     | <i>ARHGEF11</i> | Body    |
| cg15760474 | 6  | 41,554,529  | 9.7E-08  | 0.212 | 0.210 |  |  |     | <i>FOXP4</i>    | Body    |
| cg14304817 | 11 | 89,867,911  | 0.0004   | 0.212 | 0.250 |  |  |     | <i>NAALAD2</i>  | 5'UTR   |
| cg19565738 | 2  | 174,083,367 | 1.97E-13 | 0.212 | 0.216 |  |  | Yes | <i>ZAK</i>      | Body    |
| cg20733761 | 21 | 47,295,215  | 0.000229 | 0.212 | 0.160 |  |  |     | <i>PCBP3</i>    | Body    |
| cg21064451 | 22 | 38,071,534  | 0.000191 | 0.212 | 0.238 |  |  |     | <i>LGALS1</i>   | TSS200  |
| cg22942200 | 6  | 151,560,992 | 6.55E-06 | 0.212 | 0.197 |  |  |     | <i>AKAP12</i>   | TSS200  |
| cg07943780 | 8  | 41,502,612  | 0.000487 | 0.211 | 0.120 |  |  |     |                 |         |
| cg08323277 | 2  | 20,248,420  | 1.68E-07 | 0.211 | 0.212 |  |  |     | <i>LAPTM4A</i>  | Body    |
| cg18363035 | 13 | 20,805,385  | 1.53E-06 | 0.211 | 0.193 |  |  |     | <i>GJB6</i>     | 5'UTR   |
| cg18773937 | 2  | 113,594,611 | 0.003602 | 0.211 | 0.244 |  |  |     | <i>IL1B</i>     | TSS1500 |
| cg21429615 | 6  | 16,180,388  | 0.014791 | 0.211 | 0.133 |  |  |     |                 |         |
| cg22272056 | 11 | 33,065,566  | 0.000265 | 0.211 | 0.140 |  |  |     | <i>TCP11L1</i>  | Body    |

|            |    |             |          |       |       |          |       |  |                 |         |
|------------|----|-------------|----------|-------|-------|----------|-------|--|-----------------|---------|
| cg09473745 | 10 | 31,423,550  | 3.56E-06 | 0.211 | 0.210 |          |       |  |                 |         |
| cg23702610 | 15 | 100,017,287 | 7.17E-08 | 0.211 | 0.193 |          |       |  |                 |         |
| cg06791102 | X  | 153,191,600 | 0.032871 | 0.211 | 0.219 |          |       |  | <i>ARHGAP4</i>  | 1stExon |
| cg08985885 | 12 | 53,719,903  | 6.39E-08 | 0.211 | 0.249 |          |       |  |                 |         |
| cg01557547 | 3  | 157,823,089 | 0.049516 | 0.211 | 0.252 |          |       |  | <i>SHOX2</i>    | Body    |
| cg14846380 | 12 | 125,333,322 | 2.35E-40 | 0.211 | 0.191 |          |       |  | <i>SCARB1</i>   | Body    |
| cg20610181 | 9  | 35,674,000  | 1.69E-11 | 0.211 | 0.207 | 1.07E-29 | 0.165 |  | <i>CA9</i>      | 1stExon |
| cg24715245 | 4  | 41,258,794  | 0.001362 | 0.211 | 0.219 | 3.8E-34  | 0.272 |  | <i>UCHL1</i>    | TSS200  |
| cg12395205 | 18 | 12,254,469  | 0.042676 | 0.211 | 0.186 |          |       |  | <i>CIDEA</i>    | Body    |
| cg01588826 | 19 | 36,352,459  | 0.000291 | 0.211 | 0.200 |          |       |  | <i>KIRREL2</i>  | Body    |
| cg15167044 | 6  | 100,039,413 | 0.007445 | 0.211 | 0.228 |          |       |  |                 |         |
| cg20402783 | 12 | 54,381,013  | 7.39E-16 | 0.211 | 0.188 |          |       |  | <i>HOXC10</i>   | Body    |
| cg02288964 | 1  | 967,561     | 3.12E-07 | 0.211 | 0.193 |          |       |  | <i>AGRN</i>     | Body    |
| cg04342110 | 19 | 38,945,908  | 0.002358 | 0.211 | 0.231 |          |       |  | <i>RYR1</i>     | Body    |
| cg15473329 | 19 | 39,862,918  | 2.87E-06 | 0.211 | 0.197 |          |       |  | <i>SAMD4B</i>   | Body    |
| cg01064918 | 14 | 92,788,960  | 0.028639 | 0.211 | 0.197 |          |       |  | <i>SLC24A4</i>  | 1stExon |
| cg13225166 | 17 | 37,761,216  | 0.018567 | 0.211 | 0.247 |          |       |  | <i>NEUROD2</i>  | 3'UTR   |
| cg19981243 | 3  | 114,478,256 | 2.34E-08 | 0.211 | 0.213 |          |       |  | <i>ZBTB20</i>   | TSS200  |
| cg21639114 | 6  | 130,687,884 | 0.006158 | 0.211 | 0.105 |          |       |  |                 |         |
| cg08727316 | 10 | 24,545,715  | 4.21E-09 | 0.211 | 0.210 |          |       |  | <i>KIAA1217</i> | Body    |
| cg11083848 | 14 | 76,371,681  | 3.37E-10 | 0.211 | 0.219 |          |       |  | <i>TLL5</i>     | Body    |
| cg26786382 | 11 | 61,277,328  | 2.6E-07  | 0.211 | 0.160 |          |       |  | <i>LRRC10B</i>  | 1stExon |
| cg02860342 | 15 | 73,661,484  | 0.000402 | 0.211 | 0.193 | 1.84E-30 | 0.186 |  | <i>HCN4</i>     | 1stExon |
| cg08452338 | 3  | 149,271,990 | 2.54E-13 | 0.211 | 0.215 |          |       |  | <i>WWTR1</i>    | Body    |
| cg00579036 | 6  | 25,138,551  | 0.047025 | 0.211 | 0.111 |          |       |  | <i>CMAH</i>     | TSS1500 |
| cg00182273 | 16 | 66,876,847  | 3.14E-10 | 0.211 | 0.219 |          |       |  | <i>CA7</i>      | TSS1500 |
| cg19343464 | 11 | 105,481,509 | 0.025553 | 0.211 | 0.215 | 2.09E-15 | 0.173 |  | <i>GRIA4</i>    | 5'UTR   |
| cg25907215 | 22 | 24,178,181  | 1.72E-05 | 0.211 | 0.222 |          |       |  | <i>DERL3</i>    | 3'UTR   |
| cg26485844 | 5  | 77,256,916  | 1.25E-08 | 0.211 | 0.205 |          |       |  |                 |         |
| cg00934355 | 9  | 1,049,244   | 0.021567 | 0.211 | 0.191 |          |       |  | <i>DMRT2</i>    | TSS1500 |
| cg22449337 | 1  | 40,943,913  | 0.001172 | 0.211 | 0.156 |          |       |  | <i>ZNF642</i>   | 5'UTR   |
| cg07924363 | X  | 133,680,812 | 0.047775 | 0.211 | 0.192 |          |       |  | <i>MGC16121</i> | TSS200  |
| cg10457539 | 4  | 85,418,584  | 2.6E-05  | 0.211 | 0.231 |          |       |  | <i>NKX6-1</i>   | Body    |
| cg13134650 | 1  | 203,156,764 | 2.17E-08 | 0.211 | 0.214 |          |       |  | <i>CHI3L1</i>   | TSS1500 |

|            |    |             |          |       |       |          |       |     |                  |         |
|------------|----|-------------|----------|-------|-------|----------|-------|-----|------------------|---------|
| cg02867514 | 17 | 34,207,341  | 9.92E-06 | 0.211 | 0.185 |          |       |     | <i>CCL5</i>      | 1stExon |
| cg07815836 | 19 | 58,715,351  | 2.63E-08 | 0.211 | 0.226 |          |       |     | <i>ZNF274</i>    | Body    |
| cg07324245 | 17 | 75,445,905  | 2.17E-07 | 0.211 | 0.141 |          |       |     | <i>SEPT9</i>     | Body    |
| cg14542583 | 19 | 38,886,667  | 1.7E-07  | 0.211 | 0.189 |          |       |     | <i>SPRED3</i>    | Body    |
| cg26824709 | 5  | 159,740,383 | 0.000799 | 0.211 | 0.114 |          |       |     | <i>CCNJL</i>     | TSS1500 |
| cg03625415 | 5  | 172,662,741 | 3.04E-05 | 0.211 | 0.206 |          |       |     | <i>NKX2-5</i>    | TSS1500 |
| cg05219621 | X  | 15,683,403  | 2.49E-05 | 0.211 | 0.193 |          |       |     | <i>TMEM27</i>    | TSS1500 |
| cg14015441 | 8  | 105,479,318 | 0.022853 | 0.211 | 0.206 |          |       |     | <i>DPYS</i>      | TSS200  |
| cg07222604 | 6  | 30,418,872  | 0.041646 | 0.211 | 0.318 |          |       |     |                  |         |
| cg01179851 | 18 | 76,746,274  | 0.005205 | 0.211 | 0.257 |          |       |     | <i>SALL3</i>     | Body    |
| cg01204927 | 6  | 28,505,394  | 1.9E-06  | 0.211 | 0.204 |          |       |     |                  |         |
| cg01504784 | 19 | 6,414,019   | 6.29E-47 | 0.211 | 0.211 |          |       |     | <i>KHSRP</i>     | 3'UTR   |
| cg24557048 | 1  | 2,063,799   | 2.65E-06 | 0.211 | 0.210 |          |       |     | <i>PRKCZ</i>     | 5'UTR   |
| cg26700716 | 2  | 183,730,940 | 5.01E-07 | 0.211 | 0.191 |          |       |     | <i>FRZB</i>      | 1stExon |
| cg27100236 | 8  | 11,561,458  | 0.004283 | 0.211 | 0.207 |          |       |     | <i>GATA4</i>     | TSS1500 |
| cg13361910 | 1  | 232,750,286 | 3.96E-12 | 0.211 | 0.198 |          |       |     |                  |         |
| cg22752052 | 19 | 34,397,682  | 0.000157 | 0.211 | 0.154 |          |       |     |                  |         |
| cg26389380 | 3  | 11,330,567  | 1.17E-06 | 0.211 | 0.223 |          |       |     | <i>ATG7</i>      | 5'UTR   |
| cg18011517 | 2  | 42,175,341  | 0.015445 | 0.211 | 0.238 |          |       |     |                  |         |
| cg01262290 | 7  | 142,748,458 | 3.08E-10 | 0.211 | 0.211 |          |       |     | <i>OR6V1</i>     | TSS1500 |
| cg06891775 | 10 | 80,704,982  | 3.02E-09 | 0.211 | 0.192 |          |       |     | <i>LOC283050</i> | Body    |
| cg15419378 | 17 | 79,435,967  | 3.25E-10 | 0.211 | 0.200 |          |       |     |                  |         |
| cg26004203 | 1  | 217,310,918 | 4.5E-06  | 0.211 | 0.201 |          |       | Yes | <i>ESRRG</i>     | 5'UTR   |
| cg04329455 | 9  | 137,215,364 | 1.71E-08 | 0.211 | 0.201 |          |       |     |                  |         |
| cg06951677 | 1  | 221,061,837 | 0.003492 | 0.211 | 0.131 |          |       |     |                  |         |
| cg05600717 | 13 | 52,378,744  | 0.000882 | 0.211 | 0.202 | 4.93E-10 | 0.118 |     | <i>DHRS12</i>    | TSS1500 |
| cg11108890 | 2  | 85,811,471  | 8.45E-05 | 0.211 | 0.209 | 1.14E-14 | 0.151 |     | <i>VAMP5</i>     | TSS200  |
| cg11717507 | 12 | 114,838,825 | 0.032835 | 0.211 | 0.262 |          |       |     | <i>TBX5</i>      | Body    |
| cg03607951 | 1  | 79,085,586  | 0.011634 | 0.211 | 0.171 |          |       |     | <i>IFI44L</i>    | TSS1500 |
| cg10433128 | 16 | 70,720,314  | 2.02E-09 | 0.211 | 0.192 |          |       |     | <i>MTSS1L</i>    | TSS1500 |
| cg12021814 | 2  | 172,973,195 | 0.000227 | 0.211 | 0.198 |          |       |     |                  |         |
| cg26116447 | 6  | 21,666,030  | 0.041182 | 0.211 | 0.273 |          |       |     | <i>FLJ22536</i>  | TSS1500 |
| cg00360794 | 15 | 41,803,850  | 0.002514 | 0.211 | 0.194 |          |       |     | <i>LTK</i>       | Body    |
| cg05886811 | 6  | 17,280,740  | 0.000101 | 0.211 | 0.203 |          |       |     | <i>RBM24</i>     | TSS1500 |

|            |    |             |          |       |       |  |  |     |                |         |
|------------|----|-------------|----------|-------|-------|--|--|-----|----------------|---------|
| cg13845561 | 9  | 71,631,514  | 9.41E-08 | 0.211 | 0.209 |  |  |     |                |         |
| cg19414706 | 8  | 76,319,215  | 2.38E-05 | 0.211 | 0.215 |  |  |     |                |         |
| cg21214293 | 5  | 145,713,882 | 0.010497 | 0.211 | 0.216 |  |  |     |                |         |
| cg00808969 | 11 | 77,898,785  | 1.72E-10 | 0.211 | 0.191 |  |  |     | <i>USP35</i>   | TSS1500 |
| cg04605987 | 1  | 200,007,403 | 1.67E-06 | 0.211 | 0.193 |  |  |     | <i>NR5A2</i>   | Body    |
| cg14416523 | 2  | 162,273,928 | 0.019386 | 0.211 | 0.232 |  |  |     | <i>TBR1</i>    | Body    |
| cg21266502 | 4  | 155,663,225 | 0.001793 | 0.211 | 0.242 |  |  |     |                |         |
| cg15137566 | 4  | 13,544,301  | 0.003755 | 0.211 | 0.218 |  |  |     | <i>NKX3-2</i>  | Body    |
| cg08102508 | 3  | 13,115,168  | 0.000332 | 0.211 | 0.221 |  |  |     | <i>IQSEC1</i>  | TSS1500 |
| cg22517925 | 12 | 117,535,242 | 0.005898 | 0.211 | 0.124 |  |  |     | <i>TESC</i>    | Body    |
| cg22900266 | 2  | 65,089,000  | 6.84E-13 | 0.211 | 0.200 |  |  |     |                |         |
| cg06613515 | 15 | 77,287,656  | 1.68E-14 | 0.211 | 0.201 |  |  |     | <i>PSTPIP1</i> | 5'UTR   |
| cg06891458 | 15 | 41,951,943  | 0.001368 | 0.211 | 0.229 |  |  |     | <i>MGA</i>     | TSS1500 |
| cg08132940 | 7  | 1,081,526   | 7.17E-25 | 0.211 | 0.198 |  |  |     | <i>C7orf50</i> | Body    |
| cg06372962 | 1  | 173,638,690 | 0.006912 | 0.211 | 0.134 |  |  |     | <i>ANKRD45</i> | 5'UTR   |
| cg18485215 | 14 | 100,625,110 | 0.004128 | 0.211 | 0.196 |  |  |     | <i>DEGS2</i>   | Body    |
| cg23346945 | 5  | 125,671,946 | 0.00326  | 0.211 | 0.186 |  |  |     |                |         |
| cg13280041 | 6  | 138,866,865 | 7.01E-11 | 0.211 | 0.219 |  |  |     | <i>NHSL1</i>   | Body    |
| cg26942124 | 5  | 124,080,075 | 0.014354 | 0.211 | 0.235 |  |  |     | <i>ZNF608</i>  | 1stExon |
| cg05295388 | 2  | 118,594,304 | 1.87E-09 | 0.211 | 0.212 |  |  |     |                |         |
| cg06133110 | 7  | 30,028,307  | 0.000956 | 0.211 | 0.113 |  |  |     | <i>SCRN1</i>   | 5'UTR   |
| cg10369363 | 12 | 52,404,422  | 5.3E-10  | 0.211 | 0.204 |  |  |     | <i>GRASP</i>   | Body    |
| cg12017745 | 11 | 65,352,327  | 0.000993 | 0.211 | 0.248 |  |  |     | <i>EHBP1L1</i> | Body    |
| cg23739746 | 13 | 114,905,867 | 0.037055 | 0.211 | 0.200 |  |  |     |                |         |
| cg24348479 | 1  | 155,007,323 | 7.64E-08 | 0.211 | 0.207 |  |  |     | <i>DCST1</i>   | Body    |
| cg27013947 | X  | 21,776,178  | 3.92E-11 | 0.211 | 0.213 |  |  |     | <i>SMPX</i>    | 1stExon |
| cg00414384 | 11 | 68,518,048  | 2.43E-10 | 0.211 | 0.192 |  |  |     | <i>MTL5</i>    | Body    |
| cg07368507 | 5  | 137,774,431 | 5.74E-06 | 0.211 | 0.142 |  |  |     | <i>REEP2</i>   | TSS1500 |
| cg14253596 | 13 | 110,132,672 | 0.031764 | 0.211 | 0.166 |  |  | Yes |                |         |
| cg24111955 | 7  | 64,734,226  | 0.018368 | 0.211 | 0.237 |  |  |     |                |         |
| cg03140487 | X  | 40,027,582  | 5.55E-09 | 0.211 | 0.187 |  |  |     | <i>BCOR</i>    | 5'UTR   |
| cg24719487 | 1  | 78,512,129  | 0.000107 | 0.211 | 0.182 |  |  |     | <i>GIPC2</i>   | Body    |
| cg00808935 | 16 | 85,215,140  | 0.012784 | 0.211 | 0.102 |  |  |     |                |         |
| cg06804778 | 1  | 147,790,658 | 1.15E-06 | 0.211 | 0.230 |  |  |     |                |         |

|            |    |             |          |       |       |          |       |  |                     |         |
|------------|----|-------------|----------|-------|-------|----------|-------|--|---------------------|---------|
| cg21163429 | 10 | 44,788,812  | 0.009201 | 0.211 | 0.139 |          |       |  |                     |         |
| cg15110917 | 7  | 7,959,339   | 0.012654 | 0.211 | 0.251 |          |       |  |                     |         |
| cg18025275 | 8  | 22,498,768  | 2.09E-12 | 0.211 | 0.192 |          |       |  | <i>BIN3</i>         | Body    |
| cg26053832 | 16 | 54,971,600  | 0.004047 | 0.211 | 0.214 |          |       |  |                     |         |
| cg21921384 | 4  | 57,976,556  | 0.04811  | 0.211 | 0.217 |          |       |  | <i>IGFBP7</i>       | TSS200  |
| cg00629427 | 13 | 95,357,638  | 1.1E-05  | 0.211 | 0.201 |          |       |  |                     |         |
| cg09372750 | 14 | 23,823,420  | 9.99E-09 | 0.211 | 0.202 |          |       |  | <i>SLC22A17</i>     | TSS1500 |
| cg15601228 | 1  | 21,996,376  | 0.009435 | 0.211 | 0.164 |          |       |  | <i>RAP1GAP</i>      | TSS1500 |
| cg04834770 | 10 | 127,936,505 | 1.62E-05 | 0.211 | 0.180 |          |       |  | <i>ADAM12</i>       | Body    |
| cg13248581 | 22 | 17,680,545  | 1.18E-06 | 0.211 | 0.191 |          |       |  | <i>CECR1</i>        | TSS200  |
| cg07328796 | 2  | 227,389,311 | 1.53E-11 | 0.211 | 0.184 |          |       |  |                     |         |
| cg05634630 | 12 | 99,251,017  | 7.86E-08 | 0.211 | 0.204 |          |       |  | <i>ANKS1B</i>       | Body    |
| cg07136133 | 11 | 36,422,377  | 6.73E-06 | 0.211 | 0.159 |          |       |  | <i>PRR5L</i>        | 5'UTR   |
| cg07962338 | 19 | 53,540,902  | 0.044464 | 0.211 | 0.157 |          |       |  |                     |         |
| cg20662858 | 2  | 235,166,931 | 0.029797 | 0.211 | 0.190 |          |       |  |                     |         |
| cg21822146 | 14 | 77,961,897  | 7.82E-12 | 0.211 | 0.230 |          |       |  | <i>ISM2</i>         | Body    |
| cg23238834 | 6  | 31,126,879  | 0.001225 | 0.211 | 0.182 |          |       |  | <i>CCHCR1</i>       | TSS1500 |
| cg00158789 | 17 | 59,534,683  | 8.41E-06 | 0.211 | 0.212 |          |       |  | <i>TBX4</i>         | Body    |
| cg04885832 | 5  | 176,560,265 | 0.033873 | 0.211 | 0.265 |          |       |  | <i>NSD1</i>         | TSS1500 |
| cg26081162 | 6  | 49,518,449  | 0.010382 | 0.211 | 0.143 | 1.96E-08 | 0.078 |  | <i>C6orf141</i>     | 5'UTR   |
| cg03575666 | 8  | 41,168,186  | 1.35E-07 | 0.211 | 0.200 |          |       |  | <i>SFRP1</i>        | TSS1500 |
| cg10992465 | 1  | 9,504,049   | 2.11E-09 | 0.211 | 0.196 |          |       |  |                     |         |
| cg20359994 | 6  | 27,599,141  | 0.00094  | 0.211 | 0.193 |          |       |  |                     |         |
| cg04983821 | 5  | 133,407,209 | 0.000104 | 0.211 | 0.196 |          |       |  |                     |         |
| cg10502150 | 17 | 8,242,124   | 3.36E-13 | 0.211 | 0.194 |          |       |  | <i>ODF4</i>         | TSS1500 |
| cg02774705 | 2  | 121,741,143 | 1.31E-07 | 0.211 | 0.214 |          |       |  | <i>GLI2</i>         | Body    |
| cg03515656 | 16 | 1,600,304   | 5.11E-06 | 0.211 | 0.247 |          |       |  | <i>IFT140</i>       | Body    |
| cg05460318 | 1  | 232,941,530 | 0.027524 | 0.211 | 0.168 |          |       |  | <i>KIAA1383</i>     | 1stExon |
| cg13340335 | 11 | 133,907,726 | 0.043468 | 0.211 | 0.130 |          |       |  | <i>LOC100128239</i> | Body    |
| cg19708659 | 19 | 8,407,443   | 2.08E-10 | 0.211 | 0.198 |          |       |  | <i>KANK3</i>        | 5'UTR   |
| cg21626848 | 17 | 39,969,267  | 0.041833 | 0.211 | 0.089 |          |       |  | <i>SC65</i>         | TSS1500 |
| cg22824738 | 12 | 54,765,988  | 1.37E-08 | 0.211 | 0.174 |          |       |  | <i>ZNF385A</i>      | Body    |
| cg24880736 | 7  | 156,870,822 | 1.1E-07  | 0.211 | 0.244 |          |       |  |                     |         |
| cg12209693 | 7  | 73,894,884  | 0.007213 | 0.211 | 0.173 |          |       |  | <i>GTF2IRD1</i>     | 5'UTR   |

|            |    |             |          |       |       |  |  |  |                 |         |
|------------|----|-------------|----------|-------|-------|--|--|--|-----------------|---------|
| cg16598244 | 1  | 225,671,862 | 3.1E-07  | 0.211 | 0.226 |  |  |  |                 |         |
| cg00835745 | 15 | 79,722,776  | 5.39E-07 | 0.211 | 0.200 |  |  |  |                 |         |
| cg09195389 | 13 | 20,767,968  | 0.007383 | 0.211 | 0.162 |  |  |  | <i>GJB2</i>     | TSS1500 |
| cg06819546 | 3  | 62,360,674  | 0.006459 | 0.211 | 0.146 |  |  |  | <i>FEZF2</i>    | TSS1500 |
| cg08594681 | 8  | 27,468,684  | 7.9E-08  | 0.211 | 0.198 |  |  |  | <i>CLU</i>      | 1stExon |
| cg04661929 | 17 | 75,320,035  | 1.27E-09 | 0.211 | 0.185 |  |  |  | <i>SEPT9</i>    | 5'UTR   |
| cg07493499 | 17 | 911,887     | 1.04E-13 | 0.211 | 0.213 |  |  |  | <i>ABR</i>      | Body    |
| cg14264372 | 4  | 6,248,114   | 0.002887 | 0.211 | 0.203 |  |  |  |                 |         |
| cg13155295 | 6  | 31,239,653  | 0.011175 | 0.211 | 0.299 |  |  |  | <i>HLA-C</i>    | Body    |
| cg07725183 | 6  | 32,190,556  | 1.86E-05 | 0.211 | 0.205 |  |  |  | <i>NOTCH4</i>   | Body    |
| cg13110334 | 22 | 19,003,848  | 1.95E-18 | 0.211 | 0.198 |  |  |  | <i>DGCR9</i>    | TSS1500 |
| cg09064252 | 2  | 71,693,090  | 1.32E-07 | 0.211 | 0.172 |  |  |  | <i>DYSF</i>     | TSS1500 |
| cg10379890 | 6  | 391,208     | 0.049268 | 0.211 | 0.066 |  |  |  | <i>IRF4</i>     | TSS1500 |
| cg05560435 | 5  | 172,671,526 | 0.021939 | 0.211 | 0.213 |  |  |  |                 |         |
| cg14210287 | 1  | 161,695,659 | 0.023176 | 0.211 | 0.176 |  |  |  | <i>FCRLB</i>    | Body    |
| cg15844871 | 2  | 20,068,384  | 0.046926 | 0.211 | 0.092 |  |  |  |                 |         |
| cg06535156 | 6  | 155,538,055 | 6.42E-05 | 0.211 | 0.161 |  |  |  | <i>TIAM2</i>    | Body    |
| cg10095801 | 21 | 33,785,988  | 3.4E-08  | 0.211 | 0.200 |  |  |  | <i>C21orf63</i> | Body    |
| cg09232358 | 14 | 23,015,657  | 3.61E-06 | 0.211 | 0.208 |  |  |  |                 |         |
| cg16066354 | 22 | 39,417,451  | 2.62E-05 | 0.211 | 0.197 |  |  |  | <i>APOBEC3D</i> | 1stExon |
| cg23687466 | 11 | 504,937     | 0.007675 | 0.211 | 0.182 |  |  |  | <i>RNH1</i>     | 5'UTR   |
| cg00841760 | 7  | 158,362,966 | 4.56E-09 | 0.211 | 0.217 |  |  |  | <i>PTPRN2</i>   | Body    |
| cg09209257 | 14 | 78,907,020  | 3.12E-05 | 0.211 | 0.205 |  |  |  | <i>NRXN3</i>    | 5'UTR   |
| cg10324998 | 1  | 92,338,262  | 0.000692 | 0.211 | 0.242 |  |  |  | <i>TGFBR3</i>   | 5'UTR   |
| cg13671582 | 12 | 122,519,674 | 0.035025 | 0.211 | 0.180 |  |  |  | <i>MLXIP</i>    | Body    |
| cg06329345 | 4  | 121,844,259 | 0.023065 | 0.211 | 0.043 |  |  |  | <i>PRDM5</i>    | TSS1500 |
| cg11144753 | 14 | 103,740,065 | 0.000967 | 0.211 | 0.244 |  |  |  |                 |         |
| cg20611680 | 1  | 16,554,171  | 1.19E-07 | 0.211 | 0.210 |  |  |  |                 |         |
| cg05894970 | 3  | 119,041,204 | 0.048293 | 0.211 | 0.057 |  |  |  | <i>CDGAP</i>    | Body    |
| cg24085232 | 5  | 151,195,433 | 1.23E-07 | 0.211 | 0.222 |  |  |  |                 |         |
| cg14268200 | 17 | 21,094,779  | 4.25E-15 | 0.211 | 0.212 |  |  |  | <i>DHRS7B</i>   | 3'UTR   |
| cg23188430 | 6  | 125,850,052 | 0.000597 | 0.211 | 0.236 |  |  |  |                 |         |
| cg03041109 | 4  | 109,057,004 | 5.95E-10 | 0.211 | 0.185 |  |  |  | <i>LEF1</i>     | Body    |
| cg07956003 | 7  | 95,433,460  | 1.66E-20 | 0.211 | 0.193 |  |  |  | <i>DYNC1I1</i>  | 5'UTR   |



|            |    |             |          |       |       |          |       |  |                  |         |
|------------|----|-------------|----------|-------|-------|----------|-------|--|------------------|---------|
| cg16607065 | 1  | 3,607,222   | 0.006758 | 0.211 | 0.197 | 1.36E-14 | 0.179 |  | <i>TP73</i>      | Body    |
| cg21751684 | 15 | 89,920,887  | 0.000191 | 0.211 | 0.192 |          |       |  | <i>LOC254559</i> | TSS1500 |
| cg00657094 | 1  | 1,174,190   | 2.29E-13 | 0.211 | 0.198 |          |       |  |                  |         |
| cg08017928 | 7  | 156,801,818 | 0.028982 | 0.211 | 0.253 |          |       |  | <i>MNX1</i>      | 1stExon |
| cg27088150 | 3  | 62,353,894  | 0.010293 | 0.211 | 0.234 |          |       |  |                  |         |
| cg07376535 | 18 | 905,450     | 0.014627 | 0.211 | 0.193 | 4.73E-08 | 0.134 |  | <i>ADCYAP1</i>   | Body    |
| cg08526991 | 2  | 5,831,394   | 2.16E-05 | 0.211 | 0.193 |          |       |  | <i>SOX11</i>     | TSS1500 |
| cg13582816 | 4  | 85,404,099  | 0.001941 | 0.211 | 0.231 |          |       |  |                  |         |
| cg14373403 | 6  | 169,351,425 | 3.1E-05  | 0.211 | 0.182 |          |       |  |                  |         |
| cg15393221 | 19 | 40,919,485  | 1.65E-06 | 0.211 | 0.199 |          |       |  | <i>PRX</i>       | TSS1500 |
| cg21865249 | 1  | 208,144,007 | 6.14E-12 | 0.211 | 0.187 |          |       |  |                  |         |
| cg25463779 | 12 | 124,773,236 | 2.29E-09 | 0.211 | 0.195 |          |       |  | <i>FAM101A</i>   | TSS1500 |
| cg11884933 | 7  | 2,774,414   | 3.3E-11  | 0.211 | 0.197 |          |       |  | <i>GNA12</i>     | Body    |
| cg15619377 | 10 | 80,270,722  | 5.7E-06  | 0.211 | 0.178 |          |       |  |                  |         |
| cg19940312 | 4  | 20,257,590  | 2.51E-05 | 0.211 | 0.209 |          |       |  | <i>SLIT2</i>     | Body    |
| cg10308654 | 17 | 59,479,306  | 5.46E-06 | 0.211 | 0.187 |          |       |  | <i>TBX2</i>      | Body    |
| cg14962509 | 1  | 36,039,655  | 1.11E-16 | 0.211 | 0.209 |          |       |  | <i>TFAP2E</i>    | Body    |
| cg02892577 | 10 | 121,181,759 | 0.000168 | 0.211 | 0.236 |          |       |  | <i>GRK5</i>      | Body    |
| cg06080874 | 18 | 46,501,625  | 0.005382 | 0.211 | 0.130 |          |       |  |                  |         |
| cg06527318 | 1  | 25,349,006  | 1.75E-06 | 0.211 | 0.213 |          |       |  |                  |         |
| cg09516959 | 7  | 30,721,478  | 4.63E-06 | 0.211 | 0.243 |          |       |  | <i>CRHR2</i>     | Body    |
| cg18743287 | 19 | 55,575,837  | 5.59E-09 | 0.211 | 0.222 |          |       |  | <i>RDH13</i>     | TSS1500 |
| cg16061498 | 18 | 55,095,886  | 0.002553 | 0.211 | 0.202 |          |       |  |                  |         |
| cg06154531 | 1  | 846,507     | 9.32E-10 | 0.211 | 0.198 |          |       |  |                  |         |
| cg21340170 | 6  | 5,084,517   | 0.007645 | 0.211 | 0.153 |          |       |  | <i>PPP1R3G</i>   | TSS1500 |
| cg13607218 | 2  | 71,118,823  | 0.001821 | 0.211 | 0.274 |          |       |  |                  |         |
| cg27310710 | 12 | 124,941,781 | 1.11E-06 | 0.211 | 0.225 |          |       |  | <i>NCOR2</i>     | Body    |
| cg04897892 | 16 | 81,564,314  | 1.04E-05 | 0.211 | 0.195 |          |       |  | <i>CMIP</i>      | Body    |
| cg10792302 | 12 | 54,376,019  | 8.55E-24 | 0.211 | 0.189 |          |       |  |                  |         |
| cg16306900 | 1  | 182,026,435 | 2.36E-14 | 0.211 | 0.210 |          |       |  | <i>ZNF648</i>    | Body    |
| cg18316621 | 6  | 144,283,348 | 0.001067 | 0.211 | 0.197 |          |       |  | <i>PLAGL1</i>    | 5'UTR   |
| cg16452651 | 21 | 35,016,873  | 6.8E-10  | 0.211 | 0.206 |          |       |  | <i>ITSN1</i>     | 5'UTR   |
| cg18637459 | 12 | 108,991,991 | 0.002661 | 0.211 | 0.283 |          |       |  | <i>TMEM119</i>   | TSS200  |
| cg03192551 | 17 | 42,403,152  | 1.74E-05 | 0.210 | 0.169 | 8.47E-32 | 0.206 |  | <i>SLC25A39</i>  | TSS1500 |

|            |    |             |          |       |       |          |       |  |                 |         |
|------------|----|-------------|----------|-------|-------|----------|-------|--|-----------------|---------|
| cg08696638 | 16 | 31,160,393  | 1.36E-17 | 0.210 | 0.228 |          |       |  | <i>PRSS36</i>   | Body    |
| cg09990169 | 2  | 241,835,740 | 1.26E-09 | 0.210 | 0.194 |          |       |  | <i>C2orf54</i>  | TSS200  |
| cg11726288 | 1  | 11,902,283  | 7.88E-05 | 0.210 | 0.173 |          |       |  | <i>CLCN6</i>    | 3'UTR   |
| cg10420310 | 16 | 14,397,576  | 0.000109 | 0.210 | 0.215 |          |       |  | <i>MIR193B</i>  | TSS1500 |
| cg11072645 | 7  | 157,754,746 | 0.00764  | 0.210 | 0.127 |          |       |  | <i>PTPRN2</i>   | Body    |
| cg12634591 | 2  | 177,028,606 | 0.013393 | 0.210 | 0.208 |          |       |  | <i>HOXD3</i>    | TSS200  |
| cg19442915 | 19 | 45,827,305  | 0.001268 | 0.210 | 0.166 |          |       |  | <i>CKM</i>      | TSS1500 |
| cg23034373 | 21 | 37,915,354  | 8.47E-11 | 0.210 | 0.210 |          |       |  | <i>CLDN14</i>   | 5'UTR   |
| cg27038472 | 19 | 19,102,129  | 3.08E-14 | 0.210 | 0.201 |          |       |  | <i>SFRS14</i>   | 3'UTR   |
| cg07772660 | 1  | 17,085,863  | 1.27E-05 | 0.210 | 0.210 |          |       |  | <i>MST1P9</i>   | Body    |
| cg15174396 | 6  | 29,796,363  | 0.00123  | 0.210 | 0.244 |          |       |  | <i>HLA-G</i>    | Body    |
| cg22332157 | X  | 12,995,746  | 0.008066 | 0.210 | 0.239 |          |       |  |                 |         |
| cg00692173 | 1  | 53,217,358  | 4.71E-17 | 0.210 | 0.224 |          |       |  | <i>ZYG11B</i>   | Body    |
| cg02807859 | 13 | 28,350,407  | 0.017625 | 0.210 | 0.244 |          |       |  |                 |         |
| cg15618978 | 3  | 160,167,990 | 0.000878 | 0.210 | 0.198 |          |       |  | <i>TRIM59</i>   | TSS1500 |
| cg16973715 | 3  | 64,254,112  | 7.89E-09 | 0.210 | 0.201 |          |       |  |                 |         |
| cg17852588 | 6  | 76,059,756  | 0.001662 | 0.210 | 0.175 |          |       |  | <i>FILIP1</i>   | Body    |
| cg07862554 | 3  | 154,797,083 | 0.014171 | 0.210 | 0.062 |          |       |  | <i>MME</i>      | TSS1500 |
| cg08197287 | 4  | 87,952,173  | 0.000657 | 0.210 | 0.185 |          |       |  | <i>AFF1</i>     | Body    |
| cg09491962 | 10 | 98,900,771  | 5.47E-14 | 0.210 | 0.198 |          |       |  | <i>SLIT1</i>    | Body    |
| cg04511728 | 6  | 137,817,846 | 0.033536 | 0.210 | 0.246 |          |       |  |                 |         |
| cg18152887 | 2  | 920,593     | 2.51E-05 | 0.210 | 0.168 |          |       |  |                 |         |
| cg25632299 | 5  | 60,733,133  | 3.5E-10  | 0.210 | 0.198 |          |       |  | <i>ZSWIM6</i>   | Body    |
| cg20347882 | 7  | 155,166,554 | 0.018886 | 0.210 | 0.199 |          |       |  |                 |         |
| cg23990012 | 15 | 95,870,409  | 0.024048 | 0.210 | 0.169 |          |       |  |                 |         |
| cg03465652 | 2  | 121,625,735 | 1.66E-06 | 0.210 | 0.195 |          |       |  | <i>GLI2</i>     | Body    |
| cg03320492 | 1  | 45,187,810  | 2.19E-11 | 0.210 | 0.225 |          |       |  | <i>C1orf228</i> | Body    |
| cg04569165 | X  | 153,688,677 | 5.16E-08 | 0.210 | 0.199 |          |       |  | <i>PLXNA3</i>   | Body    |
| cg05348776 | 14 | 95,693,784  | 0.004717 | 0.210 | 0.133 |          |       |  | <i>CLMN</i>     | Body    |
| cg06131666 | X  | 18,373,515  | 1.49E-08 | 0.210 | 0.188 |          |       |  | <i>SCML2</i>    | TSS1500 |
| cg15305361 | 8  | 1,405,138   | 1.5E-06  | 0.210 | 0.195 |          |       |  |                 |         |
| cg00563678 | 4  | 141,968,563 | 0.000493 | 0.210 | 0.194 |          |       |  | <i>RNF150</i>   | Body    |
| cg01501312 | 1  | 6,480,594   | 6.42E-05 | 0.210 | 0.184 |          |       |  | <i>HES2</i>     | TSS1500 |
| cg19537511 | 17 | 8,213,813   | 9.35E-08 | 0.210 | 0.211 | 1.81E-14 | 0.115 |  | <i>ARHGEF15</i> | 5'UTR   |

|            |    |             |          |       |       |  |  |  |                  |         |
|------------|----|-------------|----------|-------|-------|--|--|--|------------------|---------|
| cg22402467 | 12 | 7,168,056   | 2.18E-07 | 0.210 | 0.220 |  |  |  | <i>C1S</i>       | 1stExon |
| cg20633941 | 6  | 169,351,479 | 0.000517 | 0.210 | 0.173 |  |  |  |                  |         |
| cg16265906 | 5  | 115,152,326 | 0.006212 | 0.210 | 0.099 |  |  |  | <i>CDO1</i>      | 1stExon |
| cg06625934 | 14 | 95,238,988  | 0.004492 | 0.210 | 0.239 |  |  |  |                  |         |
| cg16906765 | 15 | 75,475,038  | 1.18E-06 | 0.210 | 0.140 |  |  |  |                  |         |
| cg18158438 | 11 | 64,322,994  | 0.00272  | 0.210 | 0.230 |  |  |  | <i>SLC22A11</i>  | TSS200  |
| cg10380643 | 1  | 1,356,764   | 5.01E-09 | 0.210 | 0.158 |  |  |  | <i>LOC441869</i> | TSS200  |
| cg23323669 | 6  | 31,126,866  | 0.011991 | 0.210 | 0.196 |  |  |  | <i>CCHCR1</i>    | TSS1500 |
| cg20656587 | 17 | 44,895,317  | 3.28E-06 | 0.210 | 0.191 |  |  |  | <i>WNT3</i>      | Body    |
| cg23176316 | 2  | 20,784,406  | 1.66E-13 | 0.210 | 0.198 |  |  |  |                  |         |
| cg21865533 | 19 | 16,394,774  | 0.000862 | 0.210 | 0.173 |  |  |  |                  |         |
| cg00595237 | 8  | 11,560,763  | 0.002674 | 0.210 | 0.212 |  |  |  | <i>GATA4</i>     | TSS1500 |
| cg06961233 | 22 | 18,531,385  | 9.12E-07 | 0.210 | 0.187 |  |  |  |                  |         |
| cg26242687 | 6  | 41,471,014  | 4.37E-06 | 0.210 | 0.224 |  |  |  |                  |         |
| cg08438435 | 15 | 29,408,145  | 6.21E-07 | 0.210 | 0.193 |  |  |  | <i>APBA2</i>     | Body    |
| cg17368808 | 20 | 9,496,892   | 2.01E-05 | 0.210 | 0.240 |  |  |  | <i>C20orf103</i> | Body    |
| cg09071155 | 7  | 27,280,914  | 3.7E-05  | 0.210 | 0.182 |  |  |  | <i>EVX1</i>      | TSS1500 |
| cg11276093 | 10 | 95,123,774  | 2.39E-08 | 0.210 | 0.191 |  |  |  | <i>MYOF</i>      | Body    |
| cg25510591 | 17 | 11,212,090  | 3.81E-11 | 0.210 | 0.187 |  |  |  | <i>SHISA6</i>    | Body    |
| cg19319588 | 10 | 46,010,025  | 0.031411 | 0.210 | 0.119 |  |  |  | <i>MARCH8</i>    | Body    |
| cg23623622 | 6  | 30,139,880  | 0.009846 | 0.210 | 0.213 |  |  |  | <i>TRIM15</i>    | Body    |
| cg02672737 | 15 | 72,476,759  | 0.008169 | 0.210 | 0.165 |  |  |  | <i>GRAMD2</i>    | Body    |
| cg06540458 | 1  | 226,951,747 | 0.000249 | 0.210 | 0.177 |  |  |  |                  |         |
| cg11067829 | 13 | 23,500,153  | 0.00075  | 0.210 | 0.190 |  |  |  |                  |         |
| cg11640208 | 17 | 42,857,157  | 0.033295 | 0.210 | 0.255 |  |  |  | <i>ADAM11</i>    | 3'UTR   |
| cg00895132 | 3  | 13,318,410  | 4.71E-20 | 0.210 | 0.215 |  |  |  |                  |         |
| cg08738280 | 1  | 168,197,198 | 0.000001 | 0.210 | 0.201 |  |  |  | <i>SFT2D2</i>    | Body    |
| cg15022739 | 18 | 34,823,045  | 2.18E-16 | 0.210 | 0.205 |  |  |  | <i>BRUNOL4</i>   | 3'UTR   |
| cg21714557 | 13 | 113,776,873 | 0.000139 | 0.210 | 0.246 |  |  |  | <i>F10</i>       | TSS1500 |
| cg08467371 | 2  | 233,180,415 | 1.37E-08 | 0.210 | 0.194 |  |  |  | <i>DIS3L2</i>    | Body    |
| cg15022039 | 5  | 139,081,063 | 8.26E-06 | 0.210 | 0.191 |  |  |  |                  |         |
| cg16199747 | 6  | 147,235,033 | 1.07E-05 | 0.210 | 0.199 |  |  |  |                  |         |
| cg02747319 | 2  | 242,480,276 | 9.4E-05  | 0.210 | 0.219 |  |  |  |                  |         |
| cg14288326 | 7  | 77,042,644  | 4E-09    | 0.210 | 0.202 |  |  |  | <i>PION</i>      | Body    |

|            |    |             |          |       |       |         |       |     |                 |         |
|------------|----|-------------|----------|-------|-------|---------|-------|-----|-----------------|---------|
| cg18941641 | 10 | 78,392,320  | 0.006235 | 0.210 | 0.214 |         |       |     |                 |         |
| cg26505974 | 11 | 1,975,791   | 3.04E-17 | 0.210 | 0.183 |         |       |     | <i>MRPL23</i>   | Body    |
| cg05707458 | 1  | 205,425,241 | 0.020594 | 0.210 | 0.188 |         |       |     |                 |         |
| cg08004073 | 3  | 169,377,725 | 0.000127 | 0.210 | 0.244 |         |       |     | <i>MECOM</i>    | Body    |
| cg10014308 | 2  | 73,518,221  | 0.01429  | 0.210 | 0.150 |         |       |     | <i>EGR4</i>     | 3'UTR   |
| cg16706349 | 10 | 85,836,590  | 0.025999 | 0.210 | 0.179 |         |       |     |                 |         |
| cg23690166 | 17 | 46,711,017  | 0.002734 | 0.210 | 0.165 |         |       |     | <i>MIR196A1</i> | TSS1500 |
| cg24812442 | 2  | 237,079,690 | 0.011223 | 0.210 | 0.183 |         |       |     |                 |         |
| cg16554164 | 1  | 32,410,678  | 7.45E-07 | 0.210 | 0.199 |         |       |     |                 |         |
| cg21767952 | 2  | 220,379,260 | 8.56E-05 | 0.210 | 0.185 |         |       |     | <i>ACCN4</i>    | 1stExon |
| cg02419321 | 12 | 54,811,762  | 5.28E-07 | 0.210 | 0.203 |         |       |     | <i>ITGA5</i>    | Body    |
| cg04899656 | 15 | 62,718,755  | 3.9E-09  | 0.210 | 0.197 |         |       |     |                 |         |
| cg26131286 | 6  | 29,521,783  | 0.0008   | 0.210 | 0.201 |         |       |     |                 |         |
| cg10037049 | 12 | 48,276,633  | 1.43E-08 | 0.210 | 0.184 |         |       |     | <i>VDR</i>      | 5'UTR   |
| cg17520027 | 1  | 200,010,708 | 2.12E-13 | 0.210 | 0.203 |         |       |     | <i>NR5A2</i>    | Body    |
| cg20276750 | 3  | 52,279,555  | 0.010179 | 0.210 | 0.169 |         |       |     | <i>PPM1M</i>    | TSS1500 |
| cg25011252 | 8  | 61,777,859  | 5.6E-07  | 0.210 | 0.190 |         |       |     | <i>CHD7</i>     | Body    |
| cg26469608 | 12 | 113,913,695 | 8.44E-07 | 0.210 | 0.235 |         |       |     |                 |         |
| cg01153385 | 12 | 115,874,926 | 7.78E-10 | 0.210 | 0.220 |         |       |     |                 |         |
| cg16248756 | 7  | 127,795,594 | 4.57E-05 | 0.210 | 0.222 |         |       |     |                 |         |
| cg26140911 | 6  | 33,399,151  | 9.32E-15 | 0.210 | 0.203 |         |       |     | <i>SYNGAP1</i>  | Body    |
| cg11035304 | 10 | 112,096,355 | 4.92E-09 | 0.210 | 0.200 |         |       |     |                 |         |
| cg11610614 | 17 | 75,877,811  | 0.000202 | 0.210 | 0.218 |         |       |     | <i>FLJ45079</i> | Body    |
| cg00421173 | 4  | 140,603,682 | 1.53E-11 | 0.210 | 0.210 |         |       | Yes | <i>MGST2</i>    | Body    |
| cg01777812 | 4  | 90,117,697  | 3.36E-13 | 0.210 | 0.179 |         |       |     |                 |         |
| cg01978558 | 8  | 93,114,437  | 0.048674 | 0.210 | 0.252 |         |       |     |                 |         |
| cg09096031 | 2  | 198,540,569 | 0.001801 | 0.210 | 0.205 | 1.4E-21 | 0.170 |     | <i>RFTN2</i>    | 1stExon |
| cg24057218 | 14 | 68,660,680  | 4.69E-11 | 0.210 | 0.212 |         |       |     | <i>RAD51L1</i>  | Body    |
| cg18778986 | X  | 154,842,064 | 0.037131 | 0.210 | 0.212 |         |       |     | <i>TMLHE</i>    | 5'UTR   |
| cg03957481 | 22 | 50,986,962  | 0.000124 | 0.210 | 0.211 |         |       |     | <i>KLHDC7B</i>  | 1stExon |
| cg07784042 | 2  | 67,893,948  | 0.003495 | 0.210 | 0.163 |         |       |     |                 |         |
| cg08798307 | 7  | 141,190,187 | 3.58E-11 | 0.210 | 0.209 |         |       |     |                 |         |
| cg13818316 | 21 | 43,185,803  | 0.001384 | 0.210 | 0.204 |         |       |     | <i>RIPK4</i>    | Body    |
| cg15171154 | 3  | 30,722,557  | 3.49E-08 | 0.210 | 0.233 |         |       |     | <i>TGFBR2</i>   | Body    |

|            |    |             |          |       |       |          |       |  |                 |         |
|------------|----|-------------|----------|-------|-------|----------|-------|--|-----------------|---------|
| cg17579753 | 17 | 34,079,998  | 2.79E-06 | 0.210 | 0.206 |          |       |  | <i>GAS2L2</i>   | TSS200  |
| cg25863503 | 6  | 27,799,295  | 0.001583 | 0.210 | 0.170 |          |       |  | <i>HIST1H4K</i> | 1stExon |
| cg00297721 | 20 | 55,200,767  | 4.42E-06 | 0.210 | 0.200 |          |       |  |                 |         |
| cg02144647 | 22 | 45,597,019  | 6.74E-08 | 0.210 | 0.167 |          |       |  | <i>C22orf9</i>  | Body    |
| cg23548163 | 19 | 46,807,119  | 0.000379 | 0.210 | 0.221 |          |       |  | <i>HIF3A</i>    | 5'UTR   |
| cg03225623 | 8  | 141,294,240 | 5.37E-17 | 0.210 | 0.193 |          |       |  | <i>TRAPPC9</i>  | Body    |
| cg06962867 | 20 | 8,110,080   | 9.9E-10  | 0.210 | 0.204 |          |       |  |                 |         |
| cg12006284 | 11 | 32,449,638  | 0.027919 | 0.210 | 0.245 | 7.12E-15 | 0.201 |  | <i>WT1</i>      | Body    |
| cg27380715 | 17 | 39,802,082  | 3.16E-07 | 0.210 | 0.174 |          |       |  |                 |         |
| cg00792751 | 11 | 44,979,029  | 5.23E-09 | 0.210 | 0.212 |          |       |  |                 |         |
| cg08876943 | 5  | 1,865,843   | 0.000149 | 0.210 | 0.125 |          |       |  |                 |         |
| cg13324103 | 10 | 29,948,428  | 1.19E-07 | 0.210 | 0.178 |          |       |  | <i>SVIL</i>     | 5'UTR   |
| cg18105675 | 2  | 3,642,400   | 2.99E-07 | 0.210 | 0.206 | 6.24E-08 | 0.077 |  | <i>COLEC11</i>  | TSS1500 |
| cg01044025 | 3  | 151,613,372 | 3E-09    | 0.210 | 0.205 |          |       |  |                 |         |
| cg10521450 | 10 | 105,439,280 | 4.89E-12 | 0.210 | 0.190 |          |       |  | <i>SH3PXD2A</i> | Body    |
| cg12199406 | 12 | 6,184,176   | 8.58E-06 | 0.210 | 0.208 |          |       |  | <i>VWF</i>      | Body    |
| cg13520770 | 11 | 3,117,181   | 0.000276 | 0.210 | 0.208 |          |       |  | <i>OSBPL5</i>   | Body    |
| cg18217235 | 6  | 50,817,157  | 0.016476 | 0.210 | 0.271 |          |       |  |                 |         |
| cg26889552 | 5  | 179,032,532 | 2E-05    | 0.210 | 0.208 |          |       |  | <i>RUFY1</i>    | Body    |
| cg05212464 | 5  | 154,071,076 | 4.1E-07  | 0.210 | 0.193 |          |       |  |                 |         |
| cg14162361 | 9  | 82,449,859  | 0.000111 | 0.210 | 0.184 |          |       |  |                 |         |
| cg15593298 | 3  | 142,681,996 | 0.000257 | 0.210 | 0.210 |          |       |  | <i>PAQR9</i>    | 1stExon |
| cg16359657 | 1  | 41,119,931  | 1.91E-05 | 0.210 | 0.228 |          |       |  | <i>RIMS3</i>    | 5'UTR   |
| cg19474888 | 6  | 125,790,562 | 0.032072 | 0.210 | 0.240 |          |       |  |                 |         |
| cg22985134 | X  | 106,163,661 | 1.9E-10  | 0.210 | 0.199 |          |       |  | <i>CLDN2</i>    | 5'UTR   |
| cg01904243 | 14 | 74,251,254  | 1.5E-06  | 0.210 | 0.205 |          |       |  | <i>C14orf43</i> | 5'UTR   |
| cg07977202 | 11 | 66,311,348  | 2.54E-19 | 0.210 | 0.203 |          |       |  | <i>ZDHHC24</i>  | Body    |
| cg10068300 | 18 | 11,752,215  | 0.008677 | 0.210 | 0.181 |          |       |  | <i>GNAL</i>     | 5'UTR   |
| cg13940929 | 15 | 40,829,048  | 1.01E-12 | 0.210 | 0.200 |          |       |  |                 |         |
| cg15619439 | 11 | 102,700,944 | 4.58E-06 | 0.210 | 0.183 |          |       |  |                 |         |
| cg02495823 | 5  | 72,599,143  | 0.006545 | 0.210 | 0.242 |          |       |  |                 |         |
| cg03642635 | 11 | 133,788,233 | 0.047921 | 0.210 | 0.269 |          |       |  | <i>IGSF9B</i>   | 3'UTR   |
| cg03958883 | 11 | 73,020,729  | 0.001501 | 0.210 | 0.090 |          |       |  | <i>ARHGEF17</i> | 1stExon |
| cg05053735 | 16 | 937,312     | 4.42E-09 | 0.210 | 0.199 |          |       |  | <i>LMF1</i>     | Body    |

|            |    |             |          |       |       |  |  |     |                 |         |
|------------|----|-------------|----------|-------|-------|--|--|-----|-----------------|---------|
| cg13754259 | 10 | 101,294,337 | 0.002618 | 0.210 | 0.253 |  |  |     | <i>NKX2-3</i>   | Body    |
| cg18808904 | 20 | 11,898,851  | 0.01737  | 0.210 | 0.072 |  |  |     | <i>BTBD3</i>    | 1stExon |
| cg23345697 | 7  | 520,489     | 7.74E-09 | 0.210 | 0.161 |  |  |     |                 |         |
| cg02297616 | 1  | 40,255,140  | 4.62E-05 | 0.210 | 0.134 |  |  |     | <i>BMP8B</i>    | TSS1500 |
| cg07267600 | 12 | 2,750,053   | 0.000643 | 0.210 | 0.224 |  |  |     | <i>CACNA1C</i>  | Body    |
| cg04339790 | 16 | 10,675,656  | 5.06E-08 | 0.210 | 0.205 |  |  |     | <i>EMP2</i>     | TSS1500 |
| cg23448978 | 7  | 51,209,365  | 0.003979 | 0.210 | 0.145 |  |  |     | <i>COBL</i>     | Body    |
| cg24757778 | 10 | 60,616,392  | 6.2E-05  | 0.210 | 0.191 |  |  |     |                 |         |
| cg25258843 | 8  | 10,587,305  | 0.002843 | 0.210 | 0.101 |  |  |     | <i>SOX7</i>     | Body    |
| cg25695992 | 2  | 38,057,966  | 7.45E-09 | 0.210 | 0.225 |  |  |     |                 |         |
| cg27550721 | 15 | 79,381,747  | 0.003492 | 0.210 | 0.232 |  |  |     | <i>RASGRF1</i>  | Body    |
| cg04850286 | 10 | 81,895,943  | 0.004282 | 0.210 | 0.207 |  |  |     | <i>PLAC9</i>    | Body    |
| cg09417849 | 16 | 331,892     | 0.015848 | 0.210 | 0.235 |  |  |     | <i>ARHGDIG</i>  | Body    |
| cg05422883 | 2  | 43,072,932  | 7.16E-08 | 0.210 | 0.214 |  |  |     |                 |         |
| cg11273176 | 2  | 26,947,126  | 3.71E-27 | 0.210 | 0.207 |  |  |     | <i>KCNK3</i>    | Body    |
| cg13967908 | 9  | 117,159,457 | 9.64E-09 | 0.210 | 0.223 |  |  |     |                 |         |
| cg18311360 | 19 | 34,311,562  | 0.010061 | 0.210 | 0.215 |  |  |     |                 |         |
| cg05091135 | 13 | 51,103,373  | 0.007397 | 0.210 | 0.250 |  |  |     |                 |         |
| cg00690609 | 10 | 72,218,900  | 0.002355 | 0.210 | 0.192 |  |  |     |                 |         |
| cg15944060 | 5  | 180,248,018 | 0.000244 | 0.210 | 0.216 |  |  |     |                 |         |
| cg25460753 | 6  | 10,384,975  | 0.000111 | 0.210 | 0.212 |  |  |     |                 |         |
| cg01480180 | 7  | 90,896,329  | 0.017991 | 0.210 | 0.272 |  |  |     | <i>FZD1</i>     | 1stExon |
| cg02216246 | 11 | 128,564,756 | 0.017525 | 0.210 | 0.172 |  |  |     | <i>FLI1</i>     | Body    |
| cg19375810 | 3  | 42,787,927  | 3.49E-07 | 0.210 | 0.233 |  |  |     | <i>CCDC13</i>   | Body    |
| cg13471424 | 1  | 149,223,500 | 0.000158 | 0.210 | 0.236 |  |  |     |                 |         |
| cg19419874 | 1  | 48,462,278  | 0.014979 | 0.210 | 0.085 |  |  |     |                 |         |
| cg26990680 | 10 | 50,816,058  | 0.015211 | 0.210 | 0.264 |  |  |     | <i>CHAT</i>     | TSS1500 |
| cg16902385 | 18 | 55,019,669  | 0.003407 | 0.210 | 0.225 |  |  |     | <i>ST8SIA3</i>  | TSS200  |
| cg23032674 | 6  | 70,992,911  | 0.001522 | 0.210 | 0.194 |  |  |     | <i>COL9A1</i>   | Body    |
| cg19424531 | 8  | 65,711,522  | 0.008253 | 0.210 | 0.109 |  |  |     | <i>CYP7B1</i>   | TSS200  |
| cg08141862 | 3  | 177,458,423 | 1.75E-09 | 0.210 | 0.183 |  |  |     |                 |         |
| cg10481065 | 20 | 37,357,371  | 0.015486 | 0.210 | 0.206 |  |  | Yes | <i>SLC32A1</i>  | 3'UTR   |
| cg12069540 | 10 | 82,173,570  | 3.45E-06 | 0.210 | 0.192 |  |  |     | <i>C10orf58</i> | TSS200  |
| cg12542656 | 2  | 43,269,469  | 7.82E-06 | 0.210 | 0.222 |  |  |     |                 |         |

|            |    |             |          |       |       |  |  |  |                |         |
|------------|----|-------------|----------|-------|-------|--|--|--|----------------|---------|
| cg13547889 | 9  | 139,433,088 | 0.008891 | 0.210 | 0.125 |  |  |  | <i>NOTCH1</i>  | Body    |
| cg14623306 | 9  | 84,280,537  | 2.05E-09 | 0.210 | 0.183 |  |  |  | <i>TLE1</i>    | Body    |
| cg26811372 | 5  | 140,772,182 | 0.009688 | 0.210 | 0.262 |  |  |  | <i>PCDHGA4</i> | Body    |
| cg20248516 | 2  | 119,602,901 | 0.020821 | 0.210 | 0.258 |  |  |  | <i>EN1</i>     | Body    |
| cg24004007 | 15 | 63,889,250  | 1.07E-08 | 0.210 | 0.203 |  |  |  | <i>FBXL22</i>  | TSS1500 |
| cg02081019 | 5  | 92,930,813  | 1.53E-06 | 0.210 | 0.208 |  |  |  |                |         |
| cg22261669 | 13 | 98,959,799  | 1.41E-08 | 0.210 | 0.162 |  |  |  | <i>FARP1</i>   | Body    |
| cg23578346 | 2  | 3,750,973   | 5.63E-05 | 0.210 | 0.224 |  |  |  |                |         |
| cg15934368 | 2  | 240,044,021 | 1.31E-07 | 0.210 | 0.217 |  |  |  | <i>HDAC4</i>   | Body    |
| cg20656294 | 17 | 76,962,736  | 8.64E-11 | 0.210 | 0.189 |  |  |  |                |         |
| cg02564259 | 16 | 67,978,429  | 3.93E-11 | 0.210 | 0.186 |  |  |  | <i>SLC12A4</i> | 3'UTR   |
| cg24686957 | 6  | 5,214,950   | 0.000124 | 0.210 | 0.174 |  |  |  | <i>LYRM4</i>   | Body    |
| cg16105870 | 2  | 131,451,075 | 1.44E-07 | 0.210 | 0.215 |  |  |  |                |         |
| cg25117523 | 17 | 76,719,640  | 8.2E-05  | 0.210 | 0.244 |  |  |  | <i>CYTH1</i>   | Body    |
| cg05146922 | 2  | 10,634,174  | 1.26E-05 | 0.210 | 0.207 |  |  |  |                |         |
| cg06963205 | 6  | 73,092,820  | 1.67E-12 | 0.210 | 0.202 |  |  |  | <i>RIMS1</i>   | Body    |
| cg14181576 | 1  | 27,961,563  | 4.83E-07 | 0.210 | 0.219 |  |  |  | <i>FGR</i>     | 5'UTR   |
| cg15584486 | 8  | 100,667,796 | 8.59E-09 | 0.210 | 0.194 |  |  |  | <i>VPS13B</i>  | Body    |
| cg18855104 | 2  | 45,181,829  | 0.00015  | 0.210 | 0.218 |  |  |  |                |         |
| cg22501608 | 15 | 78,449,129  | 1.33E-08 | 0.210 | 0.205 |  |  |  | <i>IDH3A</i>   | Body    |
| cg25040466 | 20 | 61,636,172  | 0.000128 | 0.210 | 0.201 |  |  |  |                |         |
| cg05933037 | 16 | 81,223,254  | 9.18E-15 | 0.210 | 0.202 |  |  |  | <i>PKD1L2</i>  | Body    |
| cg12477370 | 6  | 45,391,852  | 0.005661 | 0.210 | 0.162 |  |  |  | <i>RUNX2</i>   | Body    |
| cg02716490 | 2  | 242,986,091 | 8.67E-07 | 0.210 | 0.165 |  |  |  |                |         |
| cg09746494 | 4  | 147,568,715 | 0.004128 | 0.210 | 0.234 |  |  |  |                |         |
| cg11796455 | 6  | 10,883,895  | 0.000958 | 0.210 | 0.230 |  |  |  |                |         |
| cg21837207 | 1  | 119,869,897 | 0.034346 | 0.210 | 0.165 |  |  |  |                |         |
| cg07298347 | 2  | 153,264,085 | 0.000592 | 0.210 | 0.202 |  |  |  | <i>FMNL2</i>   | Body    |
| cg09174411 | 12 | 107,792,027 | 7.1E-12  | 0.210 | 0.194 |  |  |  | <i>BTBD11</i>  | Body    |
| cg14579118 | 7  | 43,797,547  | 4.57E-10 | 0.210 | 0.189 |  |  |  | <i>BLVRA</i>   | TSS1500 |
| cg15634877 | 2  | 220,299,643 | 1.34E-06 | 0.210 | 0.211 |  |  |  | <i>SPEG</i>    | TSS200  |
| cg19035526 | 2  | 217,107,125 | 0.000147 | 0.210 | 0.180 |  |  |  |                |         |
| cg04293175 | 11 | 14,282,775  | 4.47E-12 | 0.210 | 0.217 |  |  |  | <i>SPON1</i>   | Body    |
| cg04436994 | 1  | 221,055,665 | 7.48E-16 | 0.210 | 0.214 |  |  |  | <i>HLX</i>     | Body    |

|            |    |             |          |       |       |  |  |     |                 |         |
|------------|----|-------------|----------|-------|-------|--|--|-----|-----------------|---------|
| cg04819580 | 7  | 150,635,526 | 0.029074 | 0.210 | 0.217 |  |  |     |                 |         |
| cg15263021 | 11 | 61,273,282  | 1.28E-10 | 0.210 | 0.207 |  |  |     |                 |         |
| cg17552357 | 17 | 76,932,332  | 2.53E-11 | 0.210 | 0.218 |  |  |     |                 |         |
| cg11587191 | 1  | 3,382,237   | 1.58E-07 | 0.210 | 0.215 |  |  |     | <i>ARHGEF16</i> | Body    |
| cg15453278 | 11 | 67,134,607  | 8.33E-09 | 0.210 | 0.210 |  |  |     | <i>CLCF1</i>    | Body    |
| cg06801857 | 1  | 230,367,682 | 1.11E-05 | 0.210 | 0.216 |  |  |     | <i>GALNT2</i>   | Body    |
| cg23625823 | 4  | 183,698,078 | 0.000666 | 0.210 | 0.162 |  |  |     | <i>ODZ3</i>     | Body    |
| cg06049171 | 15 | 69,126,265  | 1.78E-09 | 0.210 | 0.202 |  |  |     | <i>MIR548H4</i> | Body    |
| cg09730801 | 17 | 48,048,875  | 1.52E-10 | 0.210 | 0.192 |  |  |     | <i>DLX4</i>     | Body    |
| cg11664818 | 21 | 37,852,665  | 2.01E-14 | 0.210 | 0.188 |  |  |     | <i>CLDN14</i>   | 5'UTR   |
| cg24881973 | 4  | 6,660,945   | 0.001448 | 0.210 | 0.182 |  |  |     |                 |         |
| cg26938013 | 14 | 69,015,199  | 5.16E-09 | 0.210 | 0.213 |  |  |     | <i>RAD51L1</i>  | Body    |
| cg00272971 | 10 | 102,419,564 | 0.024191 | 0.210 | 0.198 |  |  |     |                 |         |
| cg00539300 | 16 | 2,895,093   | 6.19E-07 | 0.210 | 0.190 |  |  |     |                 |         |
| cg11165960 | 15 | 62,876,940  | 5.33E-13 | 0.210 | 0.210 |  |  |     |                 |         |
| cg13098071 | 1  | 156,370,496 | 2.95E-05 | 0.210 | 0.226 |  |  |     |                 |         |
| cg04337096 | 5  | 146,257,347 | 0.000585 | 0.210 | 0.232 |  |  |     | <i>PPP2R2B</i>  | Body    |
| cg03540028 | 21 | 43,183,977  | 2.12E-11 | 0.210 | 0.190 |  |  |     | <i>RIPK4</i>    | Body    |
| cg27480580 | 19 | 12,835,134  | 1.14E-06 | 0.209 | 0.202 |  |  |     | <i>TNPO2</i>    | TSS1500 |
| cg08903441 | 17 | 80,304,981  | 0.000832 | 0.209 | 0.177 |  |  |     |                 |         |
| cg10602757 | 2  | 114,256,781 | 0.000105 | 0.209 | 0.233 |  |  |     | <i>FOXD4L1</i>  | 1stExon |
| cg23213230 | 13 | 50,570,091  | 0.00613  | 0.209 | 0.123 |  |  |     | <i>TRIM13</i>   | TSS1500 |
| cg00928753 | X  | 36,976,515  | 2.97E-05 | 0.209 | 0.220 |  |  |     |                 |         |
| cg12456799 | 10 | 106,441,036 | 0.00406  | 0.209 | 0.254 |  |  |     | <i>SORCS3</i>   | Body    |
| cg19688584 | 6  | 167,529,678 | 1.28E-06 | 0.209 | 0.157 |  |  |     | <i>CCR6</i>     | 5'UTR   |
| cg03883502 | 6  | 5,086,610   | 3.53E-07 | 0.209 | 0.178 |  |  |     | <i>PPP1R3G</i>  | 1stExon |
| cg05996160 | 2  | 16,124,662  | 8.44E-10 | 0.209 | 0.196 |  |  |     |                 |         |
| cg19871588 | 5  | 151,098,316 | 9.04E-15 | 0.209 | 0.206 |  |  | Yes |                 |         |
| cg22917372 | 12 | 122,186,536 | 8.17E-09 | 0.209 | 0.212 |  |  |     | <i>TMEM120B</i> | Body    |
| cg05437823 | 6  | 50,813,676  | 0.028917 | 0.209 | 0.296 |  |  |     | <i>TFAP2B</i>   | 3'UTR   |
| cg23395177 | 14 | 77,498,304  | 1.51E-15 | 0.209 | 0.214 |  |  | Yes |                 |         |
| cg23599385 | 2  | 106,637,299 | 8.69E-09 | 0.209 | 0.169 |  |  |     |                 |         |
| cg04037470 | 22 | 42,196,210  | 0.000789 | 0.209 | 0.150 |  |  |     | <i>CCDC134</i>  | TSS1500 |
| cg17824540 | 2  | 161,260,031 | 3.02E-06 | 0.209 | 0.174 |  |  |     | <i>RBMS1</i>    | Body    |



|            |    |             |          |       |       |          |       |  |                |         |
|------------|----|-------------|----------|-------|-------|----------|-------|--|----------------|---------|
| cg10269548 | 4  | 53,728,923  | 8.38E-09 | 0.209 | 0.220 |          |       |  | <i>RASL11B</i> | Body    |
| cg12544191 | 5  | 172,671,754 | 0.000281 | 0.209 | 0.198 |          |       |  |                |         |
| cg27022584 | 17 | 79,071,378  | 0.006366 | 0.209 | 0.246 |          |       |  | <i>BAIAP2</i>  | Body    |
| cg04847275 | 14 | 95,693,828  | 0.025299 | 0.209 | 0.125 |          |       |  | <i>CLMN</i>    | Body    |
| cg06992324 | 2  | 122,322,947 | 1.78E-11 | 0.209 | 0.232 |          |       |  | <i>CLASP1</i>  | Body    |
| cg09307985 | 19 | 36,643,070  | 1.46E-08 | 0.209 | 0.223 |          |       |  | <i>COX7A1</i>  | Body    |
| cg09450352 | 7  | 157,495,481 | 1.63E-08 | 0.209 | 0.196 |          |       |  | <i>PTPRN2</i>  | Body    |
| cg12107072 | 6  | 36,826,690  | 1.93E-07 | 0.209 | 0.192 |          |       |  | <i>PPIL1</i>   | Body    |
| cg13902024 | 7  | 131,960,464 | 0.001586 | 0.209 | 0.227 |          |       |  | <i>PLXNA4</i>  | Body    |
| cg25400746 | 9  | 131,965,635 | 0.002878 | 0.209 | 0.119 |          |       |  |                |         |
| cg15025248 | 2  | 191,278,648 | 8.03E-05 | 0.209 | 0.197 |          |       |  | <i>MFSD6</i>   | 5'UTR   |
| cg20489909 | 2  | 242,711,046 | 8.3E-14  | 0.209 | 0.190 |          |       |  |                |         |
| cg10726357 | 9  | 115,653,543 | 3.51E-11 | 0.209 | 0.198 | 1.11E-19 | 0.147 |  | <i>SLC46A2</i> | TSS1500 |
| cg14606256 | 12 | 54,132,568  | 1.24E-05 | 0.209 | 0.196 |          |       |  |                |         |
| cg20438687 | 17 | 4,761,644   | 0.026451 | 0.209 | 0.119 |          |       |  | <i>MINK1</i>   | Body    |
| cg23026995 | X  | 128,872,940 | 9.58E-07 | 0.209 | 0.192 | 1.38E-19 | 0.229 |  | <i>XPNPEP2</i> | TSS200  |
| cg08006672 | 16 | 85,427,738  | 5E-29    | 0.209 | 0.200 |          |       |  |                |         |
| cg12533496 | 17 | 26,859,931  | 1.54E-13 | 0.209 | 0.213 |          |       |  | <i>FOXN1</i>   | Body    |
| cg00875272 | 1  | 47,695,321  | 0.02977  | 0.209 | 0.231 | 3.72E-11 | 0.175 |  | <i>TAL1</i>    | 5'UTR   |
| cg13757263 | 3  | 53,807,593  | 0.000329 | 0.209 | 0.262 |          |       |  | <i>CACNA1D</i> | Body    |
| cg19600750 | 14 | 57,274,677  | 0.008413 | 0.209 | 0.192 |          |       |  | <i>OTX2</i>    | 5'UTR   |
| cg02064724 | 14 | 74,179,953  | 0.014132 | 0.209 | 0.126 |          |       |  | <i>PNMA1</i>   | 1stExon |
| cg04212150 | 18 | 56,531,132  | 6.43E-05 | 0.209 | 0.114 |          |       |  | <i>ZNF532</i>  | 5'UTR   |
| cg09042448 | 8  | 23,260,443  | 4.3E-11  | 0.209 | 0.188 |          |       |  | <i>LOXL2</i>   | 5'UTR   |
| cg11142489 | 4  | 74,810,142  | 0.006114 | 0.209 | 0.187 |          |       |  |                |         |
| cg13604166 | 3  | 133,811,326 | 3.16E-17 | 0.209 | 0.201 |          |       |  |                |         |
| cg25102417 | 1  | 115,632,693 | 0.016927 | 0.209 | 0.079 |          |       |  | <i>TSPAN2</i>  | TSS1500 |
| cg07076816 | 7  | 38,351,154  | 0.001252 | 0.209 | 0.107 |          |       |  |                |         |
| cg07126235 | 6  | 43,192,225  | 5.64E-05 | 0.209 | 0.209 |          |       |  | <i>CUL9</i>    | 3'UTR   |
| cg09287629 | 2  | 203,036,208 | 5.17E-06 | 0.209 | 0.214 |          |       |  |                |         |
| cg14608384 | 5  | 54,516,879  | 6.32E-05 | 0.209 | 0.201 |          |       |  |                |         |
| cg22724998 | 15 | 60,288,082  | 0.009275 | 0.209 | 0.160 |          |       |  |                |         |
| cg27279674 | 12 | 3,049,965   | 8.13E-15 | 0.209 | 0.206 |          |       |  | <i>TULP3</i>   | 3'UTR   |
| cg02664349 | 18 | 11,149,841  | 0.009564 | 0.209 | 0.145 |          |       |  | <i>FAM38B</i>  | TSS1500 |

|            |    |             |          |       |       |          |       |  |                  |         |
|------------|----|-------------|----------|-------|-------|----------|-------|--|------------------|---------|
| cg06255601 | 13 | 51,086,835  | 0.041963 | 0.209 | 0.104 |          |       |  |                  |         |
| cg07501955 | 6  | 161,395,110 | 1.15E-08 | 0.209 | 0.206 |          |       |  |                  |         |
| cg24324815 | 10 | 21,783,445  | 0.000299 | 0.209 | 0.194 |          |       |  | <i>C10orf114</i> | 3'UTR   |
| cg27109600 | 2  | 200,332,025 | 1.76E-05 | 0.209 | 0.196 |          |       |  | <i>FLJ32063</i>  | TSS1500 |
| cg14260073 | 6  | 137,244,681 | 6.22E-05 | 0.209 | 0.202 |          |       |  | <i>SLC35D3</i>   | Body    |
| cg07318609 | 10 | 128,585,354 | 0.000228 | 0.209 | 0.234 |          |       |  |                  |         |
| cg27376024 | 11 | 63,273,565  | 3.39E-08 | 0.209 | 0.188 |          |       |  | <i>LGALS12</i>   | 5'UTR   |
| cg26094554 | 17 | 36,719,654  | 3.62E-05 | 0.209 | 0.203 |          |       |  | <i>SRCIN1</i>    | Body    |
| cg10234477 | 12 | 6,585,594   | 0.0003   | 0.209 | 0.191 |          |       |  |                  |         |
| cg15202353 | 1  | 162,831,613 | 5.71E-11 | 0.209 | 0.205 |          |       |  | <i>C1orf110</i>  | 5'UTR   |
| cg19159365 | 1  | 67,218,505  | 0.000155 | 0.209 | 0.181 |          |       |  | <i>TCTEX1D1</i>  | 5'UTR   |
| cg22041190 | 11 | 125,037,348 | 0.006213 | 0.209 | 0.113 |          |       |  | <i>PKNOX2</i>    | 5'UTR   |
| cg22362636 | 4  | 2,758,447   | 0.002833 | 0.209 | 0.133 | 2.05E-40 | 0.181 |  | <i>TNIP2</i>     | TSS1500 |
| cg05114606 | 17 | 21,274,193  | 4.11E-06 | 0.209 | 0.236 |          |       |  |                  |         |
| cg22891600 | 2  | 104,018,319 | 0.02823  | 0.209 | 0.267 |          |       |  |                  |         |
| cg15082028 | 1  | 19,043,507  | 0.040332 | 0.209 | 0.248 |          |       |  | <i>PAX7</i>      | Body    |
| cg23151014 | 4  | 2,418,311   | 9.45E-07 | 0.209 | 0.195 |          |       |  | <i>ZFYVE28</i>   | Body    |
| cg01876338 | 2  | 54,087,008  | 0.000541 | 0.209 | 0.126 |          |       |  | <i>GPR75</i>     | 5'UTR   |
| cg08618173 | 16 | 81,709,749  | 1.95E-17 | 0.209 | 0.192 |          |       |  | <i>CMIP</i>      | Body    |
| cg09820479 | X  | 128,810,342 | 9.8E-08  | 0.209 | 0.215 |          |       |  |                  |         |
| cg14080888 | 9  | 130,712,990 | 9.12E-11 | 0.209 | 0.193 |          |       |  | <i>FAM102A</i>   | 5'UTR   |
| cg07284994 | 16 | 66,982,673  | 1.03E-06 | 0.209 | 0.191 |          |       |  |                  |         |
| cg01896298 | X  | 69,643,036  | 0.00304  | 0.209 | 0.186 |          |       |  | <i>GDPD2</i>     | 1stExon |
| cg06960461 | 12 | 132,950,559 | 0.0349   | 0.209 | 0.224 |          |       |  |                  |         |
| cg08712669 | 1  | 151,585,705 | 0.000617 | 0.209 | 0.118 |          |       |  | <i>SNX27</i>     | Body    |
| cg10506882 | 3  | 35,681,627  | 0.01536  | 0.209 | 0.153 |          |       |  |                  |         |
| cg14880894 | 4  | 78,697,859  | 1.91E-09 | 0.209 | 0.208 |          |       |  | <i>CNOT6L</i>    | Body    |
| cg20635409 | 12 | 103,359,273 | 0.002018 | 0.209 | 0.232 |          |       |  |                  |         |
| cg04552206 | 10 | 102,896,546 | 0.000447 | 0.209 | 0.166 |          |       |  | <i>TLX1</i>      | Body    |
| cg04651781 | 4  | 1,398,798   | 0.005732 | 0.209 | 0.217 |          |       |  |                  |         |
| cg08081323 | 11 | 57,232,407  | 2.59E-08 | 0.209 | 0.199 |          |       |  | <i>RTN4RL2</i>   | Body    |
| cg23144473 | 7  | 38,340,103  | 0.000137 | 0.209 | 0.212 |          |       |  |                  |         |
| cg18680626 | 4  | 6,052,527   | 0.003367 | 0.209 | 0.170 |          |       |  | <i>JAKMIP1</i>   | Body    |
| cg21863499 | 1  | 27,113,640  | 0.000786 | 0.209 | 0.143 |          |       |  | <i>PIGV</i>      | TSS1500 |

|            |    |             |          |       |       |           |       |  |          |         |
|------------|----|-------------|----------|-------|-------|-----------|-------|--|----------|---------|
| cg00109703 | 20 | 39,320,005  | 0.000174 | 0.209 | 0.209 |           |       |  |          |         |
| cg12584458 | 6  | 28,447,107  | 0.00447  | 0.209 | 0.211 |           |       |  |          |         |
| cg13565575 | 12 | 48,397,568  | 0.009153 | 0.209 | 0.109 |           |       |  | COL2A1   | Body    |
| cg21325715 | 17 | 80,297,128  | 0.000228 | 0.209 | 0.270 |           |       |  |          |         |
| cg26931862 | 12 | 54,349,169  | 0.000283 | 0.209 | 0.213 |           |       |  | HOXC12   | 1stExon |
| cg01377200 | 4  | 184,938,316 | 0.000136 | 0.209 | 0.212 |           |       |  | STOX2    | Body    |
| cg01857151 | 5  | 145,304,100 | 2.46E-11 | 0.209 | 0.201 |           |       |  |          |         |
| cg23194346 | X  | 49,033,828  | 1.33E-15 | 0.209 | 0.205 |           |       |  | PRICKLE3 | Body    |
| cg24549659 | 4  | 187,219,643 | 1.49E-08 | 0.209 | 0.184 |           |       |  |          |         |
| cg06520675 | 10 | 102,996,310 | 0.022113 | 0.209 | 0.269 |           |       |  | FLJ41350 | Body    |
| cg11287077 | 5  | 158,590,712 | 4.21E-21 | 0.209 | 0.192 |           |       |  | RNF145   | Body    |
| cg13364881 | 1  | 197,880,513 | 0.005272 | 0.209 | 0.247 |           |       |  | LHX9     | TSS1500 |
| cg04247603 | 6  | 5,994,743   | 0.025149 | 0.209 | 0.197 |           |       |  |          |         |
| cg07333792 | 14 | 26,674,164  | 0.005306 | 0.209 | 0.234 |           |       |  |          |         |
| cg24642523 | 14 | 65,009,265  | 3.71E-05 | 0.209 | 0.183 | 1.16E-09  | 0.106 |  | HSPA2    | 1stExon |
| cg02452944 | 5  | 140,810,109 | 0.011403 | 0.209 | 0.255 |           |       |  | PCDHGA4  | Body    |
| cg13709982 | 9  | 136,567,739 | 0.000455 | 0.209 | 0.213 |           |       |  | SARDH    | Body    |
| cg18267489 | 20 | 23,067,159  | 0.000559 | 0.209 | 0.212 |           |       |  | CD93     | TSS200  |
| cg17503456 | 3  | 138,666,054 | 0.049297 | 0.209 | 0.231 | 0.0000256 | 0.092 |  | FOXL2    | TSS200  |
| cg02702693 | 12 | 116,808,845 | 1.82E-18 | 0.209 | 0.209 |           |       |  |          |         |
| cg13382769 | 7  | 79,084,078  | 0.013914 | 0.209 | 0.203 |           |       |  | MAGI2    | TSS1500 |
| cg21767759 | 17 | 48,154,356  | 7.36E-14 | 0.209 | 0.209 |           |       |  | ITGA3    | Body    |
| cg00713400 | 7  | 22,233,206  | 1.99E-09 | 0.209 | 0.194 |           |       |  | RAPGEF5  | Body    |
| cg09792970 | 12 | 111,374,169 | 0.016963 | 0.209 | 0.191 |           |       |  |          |         |
| cg11267546 | 7  | 27,167,828  | 4.11E-09 | 0.209 | 0.229 |           |       |  | HOXA3    | TSS1500 |
| cg12078229 | 19 | 19,245,687  | 1.3E-05  | 0.209 | 0.199 |           |       |  | TMEM161A | Body    |
| cg18028999 | 15 | 81,426,610  | 0.009392 | 0.209 | 0.176 |           |       |  | C15orf26 | TSS200  |
| cg00328900 | 5  | 82,769,097  | 0.017575 | 0.209 | 0.087 |           |       |  | VCAN     | 5'UTR   |
| cg03235661 | 20 | 60,525,775  | 9.88E-05 | 0.209 | 0.182 |           |       |  |          |         |
| cg04661629 | 1  | 26,687,174  | 0.022757 | 0.209 | 0.274 |           |       |  |          |         |
| cg14568105 | 19 | 37,282,931  | 0.017417 | 0.209 | 0.119 |           |       |  |          |         |
| cg16823083 | 1  | 3,567,412   | 3.92E-05 | 0.209 | 0.210 |           |       |  | WDR8     | TSS1500 |
| cg25600472 | 5  | 140,857,647 | 9.69E-10 | 0.209 | 0.186 |           |       |  | PCDHGA4  | Body    |
| cg02721394 | 3  | 195,914,017 | 0.000165 | 0.209 | 0.181 |           |       |  |          |         |

|            |    |             |          |       |       |          |       |     |                |         |
|------------|----|-------------|----------|-------|-------|----------|-------|-----|----------------|---------|
| cg20925383 | 13 | 50,702,410  | 1.73E-15 | 0.209 | 0.194 |          |       |     |                |         |
| cg02043791 | 8  | 38,322,629  | 6.55E-08 | 0.209 | 0.200 |          |       |     | <i>FGFR1</i>   | 5'UTR   |
| cg11302945 | 12 | 115,133,159 | 2.48E-11 | 0.209 | 0.178 |          |       |     |                |         |
| cg14667799 | 17 | 17,253,104  | 1.57E-20 | 0.209 | 0.203 |          |       |     |                |         |
| cg14963928 | 1  | 40,392,088  | 2.82E-11 | 0.209 | 0.210 |          |       |     |                |         |
| cg20640281 | 17 | 53,341,592  | 1.82E-05 | 0.209 | 0.198 |          |       |     | <i>HLF</i>     | TSS1500 |
| cg21175326 | 14 | 59,074,518  | 0.003541 | 0.209 | 0.206 |          |       |     |                |         |
| cg03591690 | 3  | 166,884,766 | 0.001279 | 0.209 | 0.202 |          |       |     |                |         |
| cg17552714 | 13 | 100,607,949 | 0.000449 | 0.209 | 0.213 |          |       |     |                |         |
| cg26853787 | 2  | 202,904,337 | 1.97E-05 | 0.209 | 0.221 |          |       |     |                |         |
| cg10418755 | 11 | 27,015,519  | 0.047732 | 0.209 | 0.274 |          |       |     | <i>FIBIN</i>   | TSS200  |
| cg21663666 | 2  | 232,220,549 | 7.74E-07 | 0.209 | 0.192 |          |       |     |                |         |
| cg15807143 | 2  | 3,452,624   | 2.59E-06 | 0.209 | 0.201 |          |       |     | <i>TTC15</i>   | Body    |
| cg21065196 | 15 | 89,913,423  | 0.025711 | 0.209 | 0.197 |          |       |     |                |         |
| cg26248586 | 14 | 95,693,981  | 4.94E-05 | 0.209 | 0.146 |          |       |     | <i>CLMN</i>    | Body    |
| cg24522654 | 12 | 19,535,154  | 0.016315 | 0.209 | 0.201 |          |       |     |                |         |
| cg00910882 | 15 | 65,648,312  | 1.98E-05 | 0.209 | 0.121 |          |       |     | <i>IGDCC3</i>  | Body    |
| cg01357370 | 1  | 156,818,961 | 0.002948 | 0.209 | 0.209 |          |       |     | <i>NTRK1</i>   | Body    |
| cg05010967 | 6  | 44,310,640  | 0.003162 | 0.209 | 0.213 | 5.28E-22 | 0.197 |     | <i>SPATS1</i>  | 5'UTR   |
| cg07631407 | 6  | 43,243,961  | 1.66E-05 | 0.209 | 0.218 |          |       |     | <i>TTBK1</i>   | Body    |
| cg08473330 | 2  | 63,282,883  | 3.56E-05 | 0.209 | 0.195 |          |       |     | <i>OTX1</i>    | Body    |
| cg16593333 | 12 | 96,514,873  | 4.91E-07 | 0.209 | 0.184 |          |       |     |                |         |
| cg21077578 | 7  | 1,022,970   | 1.57E-10 | 0.209 | 0.194 |          |       |     | <i>CYP2W1</i>  | 1stExon |
| cg24495008 | 15 | 90,198,882  | 0.020517 | 0.209 | 0.110 |          |       |     | <i>KIF7</i>    | TSS1500 |
| cg07393369 | 7  | 550,640     | 2.82E-12 | 0.209 | 0.173 |          |       |     | <i>PDGFA</i>   | Body    |
| cg07972762 | 22 | 33,196,384  | 0.038095 | 0.209 | 0.283 |          |       | Yes | <i>SYN3</i>    | Body    |
| cg22139212 | 15 | 68,062,715  | 6.3E-07  | 0.209 | 0.190 |          |       |     | <i>MAP2K5</i>  | Body    |
| cg25882366 | 17 | 46,622,037  | 0.000238 | 0.209 | 0.217 | 2.08E-21 | 0.208 |     | <i>HOXB2</i>   | 1stExon |
| cg02633924 | 17 | 75,315,563  | 0.035377 | 0.209 | 0.215 |          |       |     | <i>SEPT9</i>   | 5'UTR   |
| cg08122232 | 17 | 74,100,132  | 6.04E-08 | 0.209 | 0.184 |          |       |     | <i>EXOC7</i>   | TSS1500 |
| cg26727435 | 22 | 50,453,437  | 0.00702  | 0.209 | 0.135 |          |       |     |                |         |
| cg08647652 | 17 | 18,538,582  | 5.78E-07 | 0.209 | 0.210 |          |       |     |                |         |
| cg02728721 | 20 | 9,487,112   | 1.52E-10 | 0.209 | 0.176 |          |       |     |                |         |
| cg07658590 | 21 | 46,963,587  | 1.89E-06 | 0.209 | 0.209 | 3.16E-13 | 0.077 |     | <i>SLC19A1</i> | TSS1500 |

|            |    |             |          |       |       |          |       |  |                   |         |
|------------|----|-------------|----------|-------|-------|----------|-------|--|-------------------|---------|
| cg23052861 | 14 | 69,448,387  | 5.5E-13  | 0.209 | 0.190 |          |       |  |                   |         |
| cg24902920 | 6  | 10,416,373  | 0.019505 | 0.209 | 0.134 |          |       |  | <i>TFAP2A</i>     | Body    |
| cg00426659 | 12 | 99,548,329  | 3E-05    | 0.209 | 0.176 |          |       |  | <i>ANKS1B</i>     | 1stExon |
| cg08327744 | 8  | 33,423,298  | 1.11E-06 | 0.209 | 0.196 |          |       |  | <i>RNF122</i>     | Body    |
| cg11998932 | 7  | 3,901,843   | 0.000118 | 0.209 | 0.228 |          |       |  | <i>SDK1</i>       | Body    |
| cg16996144 | 1  | 67,217,950  | 0.000621 | 0.209 | 0.210 |          |       |  | <i>TCTEX1D1</i>   | TSS200  |
| cg14930075 | 8  | 140,715,018 | 0.013744 | 0.209 | 0.190 |          |       |  | <i>KCNK9</i>      | 1stExon |
| cg13755873 | 17 | 70,113,187  | 0.000816 | 0.209 | 0.219 |          |       |  |                   |         |
| cg17612681 | 2  | 66,298,197  | 2.43E-07 | 0.209 | 0.219 |          |       |  |                   |         |
| cg18541254 | 13 | 112,709,550 | 0.000151 | 0.209 | 0.162 |          |       |  |                   |         |
| cg18709570 | 12 | 8,172,018   | 0.041824 | 0.209 | 0.167 |          |       |  |                   |         |
| cg02628360 | 17 | 79,315,269  | 0.002289 | 0.209 | 0.238 |          |       |  |                   |         |
| cg06612196 | 6  | 6,737,390   | 0.000857 | 0.209 | 0.218 |          |       |  |                   |         |
| cg10553596 | 2  | 242,751,847 | 0.000937 | 0.209 | 0.236 |          |       |  | <i>NEU4</i>       | TSS200  |
| cg11427314 | 7  | 157,516,593 | 1.74E-13 | 0.209 | 0.206 |          |       |  | <i>PTPRN2</i>     | Body    |
| cg22093640 | 15 | 29,033,886  | 0.000282 | 0.209 | 0.211 |          |       |  |                   |         |
| cg22242539 | 17 | 1,665,220   | 4.01E-08 | 0.209 | 0.205 | 4.91E-34 | 0.136 |  | <i>SERPINF1</i>   | TSS200  |
| cg24311933 | 1  | 180,138,771 | 3.28E-17 | 0.209 | 0.205 |          |       |  | <i>QSOX1</i>      | Body    |
| cg26662049 | 15 | 89,903,672  | 0.013527 | 0.209 | 0.148 |          |       |  |                   |         |
| cg19696622 | X  | 20,285,908  | 0.017438 | 0.209 | 0.106 | 4.46E-11 | 0.057 |  | <i>RPS6KA3</i>    | TSS1500 |
| cg17860158 | 1  | 205,012,569 | 0.008842 | 0.209 | 0.286 | 9.55E-14 | 0.131 |  | <i>CNTN2</i>      | 5'UTR   |
| cg00701706 | 17 | 72,931,632  | 3.13E-09 | 0.209 | 0.203 |          |       |  | <i>OTOP3</i>      | TSS1500 |
| cg02065790 | 12 | 27,674,284  | 3.09E-10 | 0.209 | 0.208 |          |       |  |                   |         |
| cg04032071 | 12 | 54,376,241  | 3.33E-06 | 0.209 | 0.161 |          |       |  |                   |         |
| cg04457792 | 10 | 102,473,207 | 0.008113 | 0.209 | 0.233 |          |       |  |                   |         |
| cg12453631 | 3  | 157,812,226 | 3.98E-06 | 0.209 | 0.219 |          |       |  |                   |         |
| cg22560214 | 4  | 13,531,213  | 1.5E-06  | 0.209 | 0.189 |          |       |  |                   |         |
| cg05479627 | 16 | 869,560     | 0.00129  | 0.209 | 0.229 |          |       |  |                   |         |
| cg14041452 | 14 | 38,071,968  | 1.05E-06 | 0.209 | 0.222 |          |       |  |                   |         |
| cg18916055 | 17 | 74,562,048  | 0.01661  | 0.209 | 0.211 |          |       |  | <i>ST6GALNAC2</i> | 3'UTR   |
| cg19317960 | 4  | 54,452,606  | 6.21E-28 | 0.209 | 0.203 |          |       |  | <i>LNX1</i>       | 5'UTR   |
| cg21140843 | 17 | 1,398,405   | 5.1E-13  | 0.209 | 0.193 |          |       |  | <i>INPP5K</i>     | 3'UTR   |
| cg20987924 | 15 | 60,296,981  | 0.008583 | 0.209 | 0.120 |          |       |  | <i>FOXB1</i>      | 5'UTR   |
| cg11639708 | 6  | 20,209,127  | 2.18E-05 | 0.209 | 0.224 |          |       |  | <i>MBOAT1</i>     | Body    |

|            |    |             |          |       |       |          |       |  |                  |         |
|------------|----|-------------|----------|-------|-------|----------|-------|--|------------------|---------|
| cg20674701 | 8  | 10,591,081  | 0.000153 | 0.209 | 0.225 |          |       |  |                  |         |
| cg03160135 | 6  | 117,586,918 | 0.000136 | 0.209 | 0.158 | 9.42E-19 | 0.181 |  | <i>VGLL2</i>     | 1stExon |
| cg24115264 | 13 | 43,149,043  | 0.006089 | 0.209 | 0.217 |          |       |  | <i>TNFSF11</i>   | Body    |
| cg00929496 | 6  | 72,060,594  | 7.42E-11 | 0.209 | 0.221 |          |       |  |                  |         |
| cg02909789 | 14 | 68,386,026  | 1.05E-19 | 0.209 | 0.237 |          |       |  | <i>RAD51L1</i>   | Body    |
| cg04600055 | 8  | 102,092,805 | 0.026491 | 0.209 | 0.215 |          |       |  |                  |         |
| cg26681975 | 6  | 36,238,123  | 0.011936 | 0.209 | 0.226 |          |       |  | <i>PNPLA1</i>    | 5'UTR   |
| cg24396631 | X  | 119,134,082 | 0.001083 | 0.209 | 0.159 |          |       |  |                  |         |
| cg03129014 | 13 | 20,736,156  | 1.1E-06  | 0.209 | 0.188 |          |       |  | <i>GJA3</i>      | TSS1500 |
| cg07780095 | 12 | 85,674,296  | 0.044943 | 0.209 | 0.249 |          |       |  | <i>ALX1</i>      | Body    |
| cg10123662 | 1  | 17,865,713  | 2.34E-06 | 0.209 | 0.202 |          |       |  | <i>ARHGEF10L</i> | TSS1500 |
| cg25934064 | 3  | 52,569,026  | 1.19E-09 | 0.209 | 0.174 |          |       |  | <i>NT5DC2</i>    | 5'UTR   |
| cg18664514 | 2  | 219,851,181 | 2.58E-06 | 0.209 | 0.211 |          |       |  | <i>FEV</i>       | TSS1500 |
| cg26643967 | 19 | 36,485,282  | 0.001256 | 0.209 | 0.206 |          |       |  | <i>SDHAF1</i>    | TSS1500 |
| cg27109106 | 5  | 141,294,040 | 0.026103 | 0.209 | 0.127 |          |       |  |                  |         |
| cg00694520 | 2  | 223,916,687 | 0.025511 | 0.209 | 0.196 |          |       |  | <i>KCNE4</i>     | TSS200  |
| cg02266399 | 7  | 143,582,146 | 1.15E-10 | 0.209 | 0.221 |          |       |  | <i>FAM115A</i>   | 5'UTR   |
| cg04155718 | 3  | 52,519,802  | 1.59E-16 | 0.209 | 0.190 |          |       |  | <i>NISCH</i>     | Body    |
| cg15195412 | 16 | 57,406,955  | 4.97E-06 | 0.209 | 0.181 | 3.18E-36 | 0.190 |  | <i>CX3CL1</i>    | Body    |
| cg22539744 | 3  | 64,476,370  | 1.95E-11 | 0.209 | 0.188 |          |       |  |                  |         |
| cg07020001 | 12 | 122,019,031 | 0.018035 | 0.209 | 0.193 |          |       |  | <i>KDM2B</i>     | TSS200  |
| cg07906193 | 10 | 126,599,966 | 1.31E-10 | 0.209 | 0.205 |          |       |  |                  |         |
| cg10420161 | 10 | 102,899,983 | 9.9E-07  | 0.209 | 0.190 |          |       |  |                  |         |
| cg24407096 | 6  | 169,653,618 | 0.03261  | 0.209 | 0.311 |          |       |  | <i>THBS2</i>     | 5'UTR   |
| cg25075776 | 6  | 30,848,828  | 3.31E-09 | 0.209 | 0.195 |          |       |  |                  |         |
| cg18593081 | 1  | 181,286,640 | 0.016355 | 0.209 | 0.162 |          |       |  |                  |         |
| cg20545410 | 10 | 33,232,548  | 1.13E-10 | 0.209 | 0.195 |          |       |  | <i>ITGB1</i>     | 5'UTR   |
| cg22758916 | 15 | 42,303,292  | 5.75E-07 | 0.209 | 0.200 |          |       |  | <i>PLA2G4E</i>   | TSS1500 |
| cg24599107 | 1  | 161,049,443 | 2.5E-21  | 0.209 | 0.191 |          |       |  | <i>PVRL4</i>     | Body    |
| cg02100373 | 5  | 134,367,090 | 0.000115 | 0.209 | 0.241 |          |       |  | <i>PITX1</i>     | Body    |
| cg14375890 | 6  | 13,355,672  | 1.03E-13 | 0.209 | 0.182 |          |       |  |                  |         |
| cg07128124 | 21 | 44,070,430  | 1.16E-06 | 0.209 | 0.227 |          |       |  |                  |         |
| cg23129478 | 18 | 44,337,922  | 0.049937 | 0.209 | 0.060 | 4.48E-10 | 0.132 |  | <i>ST8SIA5</i>   | TSS1500 |
| cg01837846 | 2  | 23,755,343  | 4.52E-08 | 0.209 | 0.195 |          |       |  | <i>KLHL29</i>    | 5'UTR   |

|            |    |             |          |       |       |          |       |     |                 |         |
|------------|----|-------------|----------|-------|-------|----------|-------|-----|-----------------|---------|
| cg02892286 | 1  | 214,153,377 | 0.04692  | 0.209 | 0.287 |          |       |     |                 |         |
| cg09579094 | 2  | 174,949,048 | 1.46E-10 | 0.209 | 0.173 |          |       |     | <i>OLA1</i>     | Body    |
| cg09632271 | 4  | 68,441,222  | 0.03237  | 0.209 | 0.233 |          |       |     | <i>STAP1</i>    | Body    |
| cg07273992 | 11 | 68,925,191  | 3.66E-11 | 0.209 | 0.214 |          |       |     |                 |         |
| cg10742801 | 10 | 135,161,047 | 0.011243 | 0.209 | 0.190 | 5.67E-21 | 0.197 |     | <i>PRAP1</i>    | Body    |
| cg01957088 | 8  | 122,651,486 | 0.016257 | 0.209 | 0.254 |          |       |     | <i>HAS2</i>     | 5'UTR   |
| cg10104252 | 12 | 3,563,899   | 0.006959 | 0.209 | 0.214 |          |       |     |                 |         |
| cg12055395 | 7  | 96,642,605  | 0.010952 | 0.209 | 0.228 |          |       |     | <i>DLX6AS</i>   | Body    |
| cg21347353 | 22 | 25,678,439  | 0.049787 | 0.209 | 0.117 |          |       |     |                 |         |
| cg21913528 | 1  | 185,283,071 | 1.24E-06 | 0.209 | 0.217 |          |       |     | <i>IVNS1ABP</i> | 5'UTR   |
| cg08031967 | 17 | 853,971     | 2.8E-08  | 0.208 | 0.210 |          |       |     | <i>NXN</i>      | Body    |
| cg08478116 | 15 | 32,933,919  | 2.17E-09 | 0.208 | 0.161 |          |       | Yes | <i>SCG5</i>     | 1stExon |
| cg18396357 | 2  | 50,201,413  | 0.035502 | 0.208 | 0.231 |          |       |     | <i>NRXN1</i>    | Body    |
| cg23151649 | 7  | 151,393,469 | 3.13E-05 | 0.208 | 0.180 |          |       |     | <i>PRKAG2</i>   | Body    |
| cg00588517 | 6  | 31,895,464  | 3.7E-09  | 0.208 | 0.199 |          |       |     | <i>C2</i>       | 1stExon |
| cg11726792 | 4  | 113,432,701 | 1.19E-06 | 0.208 | 0.198 |          |       |     |                 |         |
| cg16484473 | 10 | 50,649,723  | 2.12E-05 | 0.208 | 0.184 |          |       |     |                 |         |
| cg03249020 | 7  | 143,060,108 | 5.07E-06 | 0.208 | 0.173 |          |       |     | <i>FAM131B</i>  | TSS1500 |
| cg04361266 | 16 | 20,910,376  | 2.18E-23 | 0.208 | 0.233 |          |       |     | <i>LYRM1</i>    | TSS1500 |
| cg22119466 | 2  | 9,331,371   | 1.01E-05 | 0.208 | 0.224 |          |       |     |                 |         |
| cg01020263 | 16 | 50,732,073  | 0.001484 | 0.208 | 0.164 |          |       |     | <i>NOD2</i>     | Body    |
| cg25995980 | 10 | 46,993,515  | 7.83E-07 | 0.208 | 0.167 |          |       |     | <i>GPRIN2</i>   | TSS200  |
| cg14865129 | 6  | 3,229,530   | 0.012535 | 0.208 | 0.280 |          |       |     |                 |         |
| cg03497399 | 3  | 33,260,934  | 9.75E-05 | 0.208 | 0.215 |          |       |     | <i>SUSD5</i>    | TSS1500 |
| cg14099718 | 9  | 36,879,449  | 9.16E-09 | 0.208 | 0.193 |          |       |     | <i>PAX5</i>     | Body    |
| cg16706749 | 15 | 74,222,816  | 1.31E-09 | 0.208 | 0.198 |          |       |     | <i>LOXL1</i>    | Body    |
| cg22826333 | 4  | 48,987,791  | 1.85E-05 | 0.208 | 0.196 |          |       |     | <i>CWH43</i>    | TSS1500 |
| cg25180075 | 2  | 129,076,367 | 0.002557 | 0.208 | 0.209 |          |       |     | <i>HS6ST1</i>   | TSS200  |
| cg01393945 | 5  | 10,457,034  | 2.2E-39  | 0.208 | 0.209 |          |       |     | <i>ROPN1L</i>   | Body    |
| cg16185299 | 5  | 3,326,644   | 0.004494 | 0.208 | 0.236 |          |       |     |                 |         |
| cg16549043 | 1  | 156,050,126 | 2.98E-09 | 0.208 | 0.221 |          |       |     | <i>MEX3A</i>    | Body    |
| cg23706836 | 8  | 6,407,997   | 9.3E-09  | 0.208 | 0.161 |          |       |     | <i>ANGPT2</i>   | Body    |
| cg23710218 | 8  | 72,756,656  | 0.000133 | 0.208 | 0.234 | 3.95E-29 | 0.211 |     | <i>MSC</i>      | 1stExon |
| cg01650904 | 20 | 37,354,889  | 0.000593 | 0.208 | 0.248 |          |       |     | <i>SLC32A1</i>  | Body    |

|            |    |             |          |       |       |           |       |  |                 |         |
|------------|----|-------------|----------|-------|-------|-----------|-------|--|-----------------|---------|
| cg06437417 | 11 | 111,895,279 | 0.002583 | 0.208 | 0.161 |           |       |  | <i>DLAT</i>     | TSS1500 |
| cg07983363 | 15 | 101,991,886 | 3.08E-07 | 0.208 | 0.205 |           |       |  | <i>PCSK6</i>    | Body    |
| cg15900221 | 1  | 3,382,434   | 3.49E-13 | 0.208 | 0.191 |           |       |  | <i>ARHGEF16</i> | Body    |
| cg17018946 | 18 | 5,894,665   | 0.02193  | 0.208 | 0.257 |           |       |  |                 |         |
| cg19697981 | 6  | 108,487,820 | 0.010154 | 0.208 | 0.307 | 3.39E-17  | 0.178 |  | <i>NR2E1</i>    | 5'UTR   |
| cg08156066 | 20 | 21,695,334  | 0.015494 | 0.208 | 0.302 |           |       |  | <i>PAX1</i>     | Body    |
| cg09873409 | 7  | 132,095,782 | 1.08E-13 | 0.208 | 0.200 |           |       |  | <i>PLXNA4</i>   | Body    |
| cg00509670 | 14 | 37,130,313  | 0.000142 | 0.208 | 0.208 | 0.0406722 | 0.038 |  | <i>PAX9</i>     | 5'UTR   |
| cg04091555 | 4  | 79,417,584  | 9.57E-16 | 0.208 | 0.193 |           |       |  | <i>FRAS1</i>    | Body    |
| cg23975840 | 12 | 117,042,895 | 0.004728 | 0.208 | 0.215 |           |       |  |                 |         |
| cg05766251 | 17 | 37,024,760  | 1.05E-05 | 0.208 | 0.193 |           |       |  | <i>LASP1</i>    | TSS1500 |
| cg19603836 | 10 | 30,317,688  | 1.56E-09 | 0.208 | 0.211 |           |       |  | <i>KIAA1462</i> | Body    |
| cg03792042 | 8  | 145,045,235 | 1.27E-06 | 0.208 | 0.186 |           |       |  | <i>PLEC1</i>    | Body    |
| cg12927277 | 2  | 238,509,162 | 1.05E-07 | 0.208 | 0.228 |           |       |  |                 |         |
| cg20442078 | 2  | 27,531,360  | 4.82E-09 | 0.208 | 0.220 |           |       |  | <i>UCN</i>      | TSS1500 |
| cg23497016 | 2  | 66,666,684  | 0.034088 | 0.208 | 0.233 |           |       |  | <i>MEIS1</i>    | Body    |
| cg02109484 | 2  | 74,875,253  | 6.76E-05 | 0.208 | 0.182 |           |       |  | <i>C2orf65</i>  | TSS200  |
| cg15840039 | X  | 66,788,098  | 4.52E-09 | 0.208 | 0.209 |           |       |  | <i>AR</i>       | TSS1500 |
| cg16927242 | 2  | 66,664,667  | 0.016511 | 0.208 | 0.246 |           |       |  | <i>MEIS1</i>    | Body    |
| cg05143345 | 14 | 23,447,408  | 1.43E-06 | 0.208 | 0.196 |           |       |  | <i>JUB</i>      | Body    |
| cg08832220 | 3  | 55,516,184  | 5.61E-05 | 0.208 | 0.179 |           |       |  | <i>WNT5A</i>    | Body    |
| cg10018167 | 14 | 64,663,683  | 2.9E-08  | 0.208 | 0.203 |           |       |  | <i>SYNE2</i>    | Body    |
| cg12186317 | 5  | 1,183,173   | 3.95E-06 | 0.208 | 0.221 |           |       |  |                 |         |
| cg16357388 | 4  | 5,892,083   | 0.018974 | 0.208 | 0.214 |           |       |  | <i>CRMP1</i>    | Body    |
| cg26266842 | 1  | 99,470,801  | 0.025519 | 0.208 | 0.257 |           |       |  | <i>LPPR5</i>    | TSS1500 |
| cg15012054 | 12 | 13,253,742  | 0.000202 | 0.208 | 0.191 |           |       |  | <i>GSG1</i>     | Body    |
| cg17403397 | 2  | 145,282,262 | 1.11E-05 | 0.208 | 0.200 |           |       |  |                 |         |
| cg25889711 | 10 | 102,473,609 | 0.006903 | 0.208 | 0.186 |           |       |  |                 |         |
| cg14643892 | 12 | 64,784,070  | 0.00027  | 0.208 | 0.226 |           |       |  | <i>C12orf56</i> | Body    |
| cg13918518 | 17 | 59,488,240  | 2.26E-05 | 0.208 | 0.190 |           |       |  | <i>C17orf82</i> | TSS1500 |
| cg14515812 | 1  | 21,978,863  | 3.06E-07 | 0.208 | 0.204 |           |       |  | <i>RAP1GAP</i>  | 5'UTR   |
| cg18438591 | 1  | 205,473,341 | 8.92E-16 | 0.208 | 0.203 |           |       |  | <i>CDK18</i>    | TSS1500 |
| cg18838941 | 10 | 15,376,939  | 1.18E-18 | 0.208 | 0.212 |           |       |  | <i>FAM171A1</i> | Body    |
| cg21117808 | 1  | 9,887,936   | 3.71E-13 | 0.208 | 0.195 |           |       |  |                 |         |



|            |    |             |          |       |       |  |  |  |                 |         |
|------------|----|-------------|----------|-------|-------|--|--|--|-----------------|---------|
| cg26455386 | 17 | 16,999,983  | 2.93E-11 | 0.208 | 0.204 |  |  |  | <i>MPRIIP</i>   | Body    |
| cg20943039 | 15 | 65,186,445  | 0.000119 | 0.208 | 0.182 |  |  |  |                 |         |
| cg07586272 | 11 | 94,134,580  | 0.014769 | 0.208 | 0.157 |  |  |  | <i>GPR83</i>    | 1stExon |
| cg09155774 | 9  | 96,723,033  | 0.000808 | 0.208 | 0.210 |  |  |  |                 |         |
| cg16934685 | 7  | 143,060,037 | 0.016453 | 0.208 | 0.145 |  |  |  | <i>FAM131B</i>  | TSS1500 |
| cg15999165 | 5  | 102,201,421 | 0.000593 | 0.208 | 0.213 |  |  |  | <i>PAM</i>      | TSS200  |
| cg01152019 | 2  | 177,015,044 | 0.012647 | 0.208 | 0.178 |  |  |  | <i>HOXD4</i>    | TSS1500 |
| cg14985891 | 1  | 116,270,626 | 4.83E-11 | 0.208 | 0.192 |  |  |  | <i>CASQ2</i>    | Body    |
| cg16169475 | 6  | 14,407,532  | 0.000503 | 0.208 | 0.226 |  |  |  |                 |         |
| cg16268769 | 1  | 156,890,782 | 5.38E-06 | 0.208 | 0.154 |  |  |  | <i>C1orf92</i>  | Body    |
| cg18303896 | 11 | 75,922,637  | 0.000254 | 0.208 | 0.200 |  |  |  |                 |         |
| cg07867517 | 16 | 75,520,165  | 0.000169 | 0.208 | 0.189 |  |  |  | <i>CHST6</i>    | 5'UTR   |
| cg18289581 | 14 | 23,830,974  | 0.0004   | 0.208 | 0.241 |  |  |  | <i>EFS</i>      | Body    |
| cg19206146 | 6  | 28,661,759  | 7.05E-05 | 0.208 | 0.219 |  |  |  |                 |         |
| cg01142776 | 2  | 228,582,816 | 0.022166 | 0.208 | 0.165 |  |  |  | <i>SLC19A3</i>  | TSS200  |
| cg12036303 | 6  | 30,652,907  | 0.000104 | 0.208 | 0.209 |  |  |  | <i>KIAA1949</i> | Body    |
| cg18592365 | 1  | 79,472,536  | 1.75E-06 | 0.208 | 0.204 |  |  |  | <i>ELTD1</i>    | TSS200  |
| cg22842797 | 17 | 48,912,621  | 1.03E-06 | 0.208 | 0.196 |  |  |  | <i>WFIKKN2</i>  | 1stExon |
| cg24414325 | 12 | 56,414,442  | 5.5E-09  | 0.208 | 0.196 |  |  |  | <i>IKZF4</i>    | TSS1500 |
| cg26334209 | 10 | 13,726,634  | 0.002863 | 0.208 | 0.196 |  |  |  | <i>FRMD4A</i>   | Body    |
| cg03215181 | 4  | 122,873,487 | 0.011298 | 0.208 | 0.188 |  |  |  | <i>TRPC3</i>    | TSS1500 |
| cg14415160 | 1  | 47,010,105  | 0.003655 | 0.208 | 0.260 |  |  |  |                 |         |
| cg15894581 | 15 | 63,889,406  | 4.43E-12 | 0.208 | 0.190 |  |  |  | <i>FBXL22</i>   | TSS200  |
| cg18647268 | 1  | 39,735,142  | 9.93E-09 | 0.208 | 0.202 |  |  |  | <i>MACF1</i>    | Body    |
| cg00145079 | 15 | 68,112,888  | 0.000314 | 0.208 | 0.241 |  |  |  |                 |         |
| cg02708705 | 17 | 74,264,300  | 4.62E-08 | 0.208 | 0.220 |  |  |  | <i>FAM100B</i>  | Body    |
| cg03512098 | 11 | 2,730,129   | 1.53E-11 | 0.208 | 0.193 |  |  |  | <i>KCNQ1</i>    | Body    |
| cg23287005 | 8  | 141,588,165 | 2.22E-08 | 0.208 | 0.222 |  |  |  | <i>EIF2C2</i>   | Body    |
| cg02019444 | 21 | 35,016,787  | 2.07E-11 | 0.208 | 0.182 |  |  |  | <i>ITSN1</i>    | 5'UTR   |
| cg09333471 | 7  | 24,796,355  | 0.009606 | 0.208 | 0.126 |  |  |  | <i>DFNA5</i>    | 5'UTR   |
| cg09838217 | 5  | 179,770,299 | 7.02E-06 | 0.208 | 0.195 |  |  |  | <i>GFPT2</i>    | Body    |
| cg03996195 | 18 | 55,095,229  | 0.002023 | 0.208 | 0.261 |  |  |  |                 |         |
| cg17453840 | 15 | 83,317,526  | 1.08E-07 | 0.208 | 0.240 |  |  |  | <i>CPEB1</i>    | TSS1500 |
| cg21241889 | 9  | 123,690,658 | 1.57E-06 | 0.208 | 0.148 |  |  |  | <i>TRAF1</i>    | TSS1500 |

|            |    |             |          |       |       |          |       |  |                |         |
|------------|----|-------------|----------|-------|-------|----------|-------|--|----------------|---------|
| cg00990769 | 8  | 98,956,478  | 1.83E-09 | 0.208 | 0.205 |          |       |  | <i>MATN2</i>   | Body    |
| cg07461072 | 16 | 28,073,940  | 2.69E-05 | 0.208 | 0.202 |          |       |  | <i>GSG1L</i>   | Body    |
| cg08166272 | 2  | 227,663,151 | 0.017692 | 0.208 | 0.188 |          |       |  | <i>IRS1</i>    | 1stExon |
| cg13597013 | 17 | 78,922,527  | 2.49E-15 | 0.208 | 0.187 |          |       |  | <i>RPTOR</i>   | Body    |
| cg22804000 | 7  | 24,797,691  | 4.4E-08  | 0.208 | 0.178 |          |       |  | <i>DFNA5</i>   | TSS1500 |
| cg25947489 | 8  | 95,246,814  | 0.031444 | 0.208 | 0.308 |          |       |  |                |         |
| cg02245378 | 2  | 223,161,771 | 0.000907 | 0.208 | 0.157 | 3.81E-17 | 0.178 |  | <i>PAX3</i>    | Body    |
| cg16272030 | 7  | 138,868,118 | 3.42E-10 | 0.208 | 0.217 |          |       |  | <i>TTC26</i>   | Body    |
| cg24729839 | 1  | 225,955,869 | 2.52E-09 | 0.208 | 0.192 |          |       |  |                |         |
| cg02042623 | 12 | 104,227,548 | 1.03E-14 | 0.208 | 0.205 |          |       |  | <i>NT5DC3</i>  | Body    |
| cg14011845 | 17 | 59,533,635  | 3.67E-10 | 0.208 | 0.183 |          |       |  | <i>TBX4</i>    | TSS200  |
| cg11599830 | 12 | 49,504,967  | 9.29E-05 | 0.208 | 0.210 |          |       |  | <i>LMBR1L</i>  | TSS1500 |
| cg19250799 | 1  | 47,910,456  | 0.008427 | 0.208 | 0.214 |          |       |  |                |         |
| cg21988119 | 19 | 17,958,937  | 9.89E-05 | 0.208 | 0.145 |          |       |  | <i>JAK3</i>    | TSS200  |
| cg13935437 | 1  | 19,600,673  | 4.09E-05 | 0.208 | 0.182 |          |       |  | <i>AKR7L</i>   | TSS200  |
| cg15055817 | 3  | 186,079,142 | 0.000854 | 0.208 | 0.166 |          |       |  | <i>DGKG</i>    | 5'UTR   |
| cg18927901 | 6  | 36,238,043  | 4.08E-06 | 0.208 | 0.180 |          |       |  | <i>PNPLA1</i>  | 5'UTR   |
| cg03305955 | 12 | 54,417,033  | 1.99E-09 | 0.208 | 0.169 |          |       |  | <i>HOXC4</i>   | 5'UTR   |
| cg05477823 | 17 | 59,481,085  | 6.58E-06 | 0.208 | 0.199 |          |       |  | <i>TBX2</i>    | Body    |
| cg09731073 | 16 | 29,262,594  | 0.001941 | 0.208 | 0.136 |          |       |  |                |         |
| cg24749089 | 2  | 153,322,823 | 1.43E-05 | 0.208 | 0.197 |          |       |  | <i>FMNL2</i>   | Body    |
| cg02406098 | 3  | 32,911,355  | 1.66E-17 | 0.208 | 0.205 |          |       |  | <i>TRIM71</i>  | Body    |
| cg05670898 | 16 | 66,460,448  | 0.000303 | 0.208 | 0.185 |          |       |  | <i>BEAN</i>    | TSS1500 |
| cg20200460 | 10 | 130,165,501 | 0.000165 | 0.208 | 0.186 |          |       |  |                |         |
| cg02026535 | 19 | 7,580,217   | 1.49E-09 | 0.208 | 0.188 |          |       |  | <i>ZNF358</i>  | TSS1500 |
| cg14543255 | 17 | 8,905,775   | 0.039018 | 0.208 | 0.145 |          |       |  |                |         |
| cg23351327 | 7  | 151,433,178 | 1.17E-08 | 0.208 | 0.161 |          |       |  | <i>PRKAG2</i>  | Body    |
| cg00541683 | 1  | 32,041,933  | 4.24E-05 | 0.208 | 0.167 |          |       |  | <i>TINAGL1</i> | TSS200  |
| cg01978213 | 4  | 41,866,309  | 3.86E-08 | 0.208 | 0.210 |          |       |  |                |         |
| cg23621418 | 10 | 75,670,653  | 0.024675 | 0.208 | 0.131 |          |       |  | <i>PLAU</i>    | TSS1500 |
| cg18231690 | 15 | 85,294,586  | 2.98E-12 | 0.208 | 0.221 |          |       |  | <i>ZNF592</i>  | 5'UTR   |
| cg25375764 | 6  | 24,494,665  | 0.000872 | 0.208 | 0.136 | 4.25E-21 | 0.133 |  | <i>ALDH5A1</i> | TSS1500 |
| cg05130115 | 16 | 11,327,053  | 2.69E-06 | 0.208 | 0.222 |          |       |  |                |         |
| cg08203788 | 7  | 25,900,279  | 2.32E-06 | 0.208 | 0.185 |          |       |  |                |         |

|            |    |             |          |       |       |          |       |  |                     |         |
|------------|----|-------------|----------|-------|-------|----------|-------|--|---------------------|---------|
| cg08244301 | 19 | 17,610,751  | 7.34E-06 | 0.208 | 0.221 |          |       |  | <i>SLC27A1</i>      | Body    |
| cg00607755 | 2  | 42,274,082  | 6.61E-06 | 0.208 | 0.155 |          |       |  | <i>PKDCC</i>        | TSS1500 |
| cg06237151 | 10 | 46,123,153  | 1.38E-05 | 0.208 | 0.231 |          |       |  | <i>ANUBL1</i>       | Body    |
| cg06936231 | 4  | 176,626,819 | 0.000464 | 0.208 | 0.238 |          |       |  | <i>GPM6A</i>        | Body    |
| cg22907295 | 11 | 84,659,234  | 3.49E-05 | 0.208 | 0.108 |          |       |  | <i>DLG2</i>         | Body    |
| cg13305415 | 5  | 141,697,464 | 3.28E-07 | 0.208 | 0.208 |          |       |  | <i>SPRY4</i>        | Body    |
| cg22117805 | 11 | 36,422,455  | 2.98E-08 | 0.208 | 0.171 |          |       |  | <i>PRR5L</i>        | 5'UTR   |
| cg06488655 | 15 | 96,903,665  | 1.65E-07 | 0.208 | 0.211 |          |       |  |                     |         |
| cg07441278 | 3  | 48,256,968  | 3.68E-09 | 0.208 | 0.205 |          |       |  |                     |         |
| cg12461113 | X  | 13,587,550  | 0.000574 | 0.208 | 0.249 |          |       |  | <i>EGFL6</i>        | TSS200  |
| cg18763247 | 2  | 12,907,913  | 0.001618 | 0.208 | 0.129 |          |       |  |                     |         |
| cg17139085 | 1  | 36,787,356  | 1.25E-07 | 0.208 | 0.206 |          |       |  |                     |         |
| cg23409774 | 5  | 175,300,141 | 0.008681 | 0.208 | 0.188 |          |       |  | <i>CPLX2</i>        | 5'UTR   |
| cg01427957 | 1  | 151,689,979 | 0.030223 | 0.208 | 0.193 |          |       |  | <i>TNRC4</i>        | TSS1500 |
| cg18345386 | 3  | 62,363,466  | 0.001764 | 0.208 | 0.201 |          |       |  |                     |         |
| cg18460175 | 19 | 36,132,561  | 0.001769 | 0.208 | 0.253 |          |       |  | <i>ETV2</i>         | TSS200  |
| cg25309292 | 13 | 113,613,574 | 0.000542 | 0.208 | 0.140 |          |       |  |                     |         |
| cg26434983 | 15 | 89,952,904  | 1.98E-06 | 0.208 | 0.183 |          |       |  |                     |         |
| cg23700513 | 6  | 29,856,305  | 0.002425 | 0.208 | 0.213 |          |       |  | <i>HLA-H</i>        | Body    |
| cg04340651 | 15 | 93,617,080  | 1.64E-08 | 0.208 | 0.173 |          |       |  | <i>RGMA</i>         | 1stExon |
| cg09091185 | 16 | 936,993     | 1.39E-09 | 0.208 | 0.181 |          |       |  | <i>LMF1</i>         | Body    |
| cg22487391 | 1  | 95,437,072  | 2.98E-14 | 0.208 | 0.217 |          |       |  |                     |         |
| cg23501051 | 11 | 19,736,912  | 4.91E-06 | 0.208 | 0.182 |          |       |  | <i>LOC100126784</i> | TSS1500 |
| cg27223805 | 11 | 2,889,616   | 1.05E-13 | 0.208 | 0.213 |          |       |  |                     |         |
| cg18724565 | 7  | 5,633,068   | 0.000506 | 0.208 | 0.210 |          |       |  | <i>FSCN1</i>        | 1stExon |
| cg01753788 | 8  | 145,024,929 | 2.46E-06 | 0.208 | 0.229 |          |       |  | <i>PLEC1</i>        | 5'UTR   |
| cg26006951 | 5  | 1,295,988   | 8.51E-06 | 0.208 | 0.173 |          |       |  | <i>TERT</i>         | TSS1500 |
| cg04573398 | 11 | 86,086,005  | 6.54E-09 | 0.208 | 0.203 |          |       |  | <i>CCDC81</i>       | 1stExon |
| cg04999691 | 7  | 150,027,050 | 2.68E-12 | 0.208 | 0.240 | 4.02E-22 | 0.105 |  | <i>C7orf29</i>      | 5'UTR   |
| cg07804276 | 2  | 219,856,889 | 0.000447 | 0.208 | 0.206 |          |       |  | <i>CRYBA2</i>       | Body    |
| cg12615761 | 18 | 8,608,907   | 0.03563  | 0.208 | 0.232 |          |       |  | <i>RAB12</i>        | TSS1500 |
| cg18690385 | 1  | 47,078,966  | 0.000146 | 0.208 | 0.227 |          |       |  | <i>MOBK12C</i>      | Body    |
| cg26156167 | 1  | 161,582,651 | 0.01089  | 0.208 | 0.097 |          |       |  |                     |         |
| cg27392559 | 17 | 27,410,759  | 1.97E-07 | 0.208 | 0.195 |          |       |  | <i>MYO18A</i>       | Body    |

|            |    |             |          |       |       |          |       |  |                 |         |
|------------|----|-------------|----------|-------|-------|----------|-------|--|-----------------|---------|
| cg06893273 | 17 | 46,604,774  | 3.63E-06 | 0.208 | 0.212 |          |       |  |                 |         |
| cg10838925 | 3  | 138,666,318 | 0.001728 | 0.208 | 0.186 |          |       |  | <i>FOXL2</i>    | TSS1500 |
| cg11869862 | 15 | 37,399,798  | 0.00012  | 0.208 | 0.225 |          |       |  |                 |         |
| cg01965636 | 14 | 90,237,942  | 0.004417 | 0.208 | 0.239 |          |       |  |                 |         |
| cg06536333 | 6  | 41,339,977  | 0.002853 | 0.208 | 0.178 |          |       |  |                 |         |
| cg11551879 | 12 | 111,620,258 | 3.81E-12 | 0.208 | 0.188 |          |       |  | <i>CUX2</i>     | Body    |
| cg10476773 | 5  | 177,412,688 | 2.64E-06 | 0.208 | 0.199 |          |       |  |                 |         |
| cg11812015 | 2  | 85,482,129  | 2.51E-13 | 0.208 | 0.197 |          |       |  | <i>TCF7L1</i>   | Body    |
| cg26391794 | 13 | 49,323,899  | 0.002518 | 0.208 | 0.176 |          |       |  |                 |         |
| cg13689996 | 17 | 71,810,497  | 0.001198 | 0.208 | 0.256 |          |       |  | <i>C17orf54</i> | Body    |
| cg14624731 | 2  | 121,436,004 | 1.49E-10 | 0.208 | 0.239 |          |       |  |                 |         |
| cg03893150 | 1  | 6,526,325   | 9.73E-05 | 0.208 | 0.208 |          |       |  | <i>TNFRSF25</i> | TSS200  |
| cg04387597 | 17 | 72,443,179  | 3.81E-10 | 0.208 | 0.194 |          |       |  | <i>GPRC5C</i>   | 3'UTR   |
| cg22778120 | 22 | 45,094,531  | 7.57E-07 | 0.208 | 0.192 |          |       |  | <i>PRR5</i>     | 5'UTR   |
| cg26899598 | 15 | 91,429,088  | 7.48E-06 | 0.208 | 0.214 |          |       |  | <i>FES</i>      | Body    |
| cg16590319 | 1  | 109,805,584 | 4.49E-06 | 0.208 | 0.236 |          |       |  | <i>CELSR2</i>   | Body    |
| cg22875872 | 1  | 44,031,756  | 5.76E-06 | 0.208 | 0.205 |          |       |  | <i>PTPRF</i>    | Body    |
| cg25550823 | 2  | 190,192,866 | 0.01974  | 0.208 | 0.266 |          |       |  |                 |         |
| cg06781608 | 7  | 157,361,040 | 4.43E-09 | 0.208 | 0.196 |          |       |  | <i>PTPRN2</i>   | Body    |
| cg22142254 | 15 | 29,228,305  | 4.9E-17  | 0.208 | 0.202 |          |       |  | <i>APBA2</i>    | 5'UTR   |
| cg23150604 | 2  | 85,732,147  | 2.85E-09 | 0.208 | 0.206 |          |       |  |                 |         |
| cg26554592 | 10 | 108,924,398 | 0.004808 | 0.208 | 0.210 |          |       |  | <i>SORCS1</i>   | TSS200  |
| cg21087137 | 12 | 75,728,469  | 0.009991 | 0.208 | 0.149 | 2.78E-23 | 0.202 |  | <i>GLIPR1L1</i> | 5'UTR   |
| cg15600969 | X  | 119,868,737 | 9.24E-15 | 0.208 | 0.206 |          |       |  |                 |         |
| cg24342961 | 2  | 97,351,094  | 4.93E-10 | 0.208 | 0.190 |          |       |  | <i>FER1L5</i>   | Body    |
| cg27425327 | 12 | 102,270,723 | 0.001244 | 0.208 | 0.141 |          |       |  | <i>DRAM1</i>    | TSS1500 |
| cg05242915 | 19 | 1,263,080   | 2.6E-14  | 0.208 | 0.203 |          |       |  |                 |         |
| cg09937500 | 2  | 208,175,271 | 6.61E-09 | 0.208 | 0.204 |          |       |  |                 |         |
| cg01018477 | 5  | 172,658,226 | 6.96E-06 | 0.208 | 0.189 |          |       |  |                 |         |
| cg04543233 | 20 | 21,689,105  | 0.006848 | 0.208 | 0.226 |          |       |  | <i>PAX1</i>     | Body    |
| cg23072823 | 3  | 14,445,421  | 0.001065 | 0.208 | 0.177 |          |       |  | <i>SLC6A6</i>   | 5'UTR   |
| cg00679520 | 12 | 63,133,578  | 1.42E-07 | 0.208 | 0.207 |          |       |  | <i>PPM1H</i>    | Body    |
| cg08829024 | 16 | 2,879,393   | 2.86E-12 | 0.208 | 0.196 |          |       |  | <i>ZG16B</i>    | TSS1500 |
| cg09954698 | 14 | 74,705,733  | 0.000616 | 0.208 | 0.225 |          |       |  | <i>VSX2</i>     | TSS1500 |

|            |    |             |          |       |       |  |  |  |                 |         |
|------------|----|-------------|----------|-------|-------|--|--|--|-----------------|---------|
| cg23991636 | 7  | 23,507,657  | 0.000194 | 0.208 | 0.205 |  |  |  | <i>IGF2BP3</i>  | Body    |
| cg01602730 | 1  | 153,671,011 | 0.000165 | 0.208 | 0.221 |  |  |  |                 |         |
| cg14025556 | 1  | 200,011,411 | 2.35E-06 | 0.208 | 0.231 |  |  |  | <i>NR5A2</i>    | Body    |
| cg17054386 | 2  | 219,855,054 | 3.2E-08  | 0.208 | 0.178 |  |  |  | <i>CRYBA2</i>   | Body    |
| cg03280245 | 11 | 57,242,445  | 5.36E-07 | 0.208 | 0.188 |  |  |  | <i>RTN4RL2</i>  | Body    |
| cg09050832 | 8  | 1,365,175   | 0.019131 | 0.208 | 0.203 |  |  |  |                 |         |
| cg10930308 | 6  | 30,039,476  | 0.003945 | 0.208 | 0.216 |  |  |  | <i>RNF39</i>    | Body    |
| cg14613470 | 5  | 137,071,799 | 1.51E-05 | 0.208 | 0.096 |  |  |  | <i>KLHL3</i>    | TSS200  |
| cg00741624 | 14 | 93,897,389  | 0.004316 | 0.208 | 0.167 |  |  |  | <i>KIAA1409</i> | 5'UTR   |
| cg01853561 | 21 | 38,120,466  | 0.002128 | 0.208 | 0.122 |  |  |  | <i>SIM2</i>     | 3'UTR   |
| cg16248515 | 3  | 156,840,234 | 7.03E-07 | 0.208 | 0.202 |  |  |  |                 |         |
| cg18082788 | 6  | 149,806,339 | 7.73E-08 | 0.208 | 0.201 |  |  |  | <i>ZC3H12D</i>  | TSS200  |
| cg19716643 | 14 | 52,735,026  | 0.023384 | 0.208 | 0.138 |  |  |  | <i>PTGDR</i>    | 1stExon |
| cg24332002 | 1  | 22,228,582  | 2.63E-12 | 0.208 | 0.203 |  |  |  | <i>HSPG2</i>    | Body    |
| cg09502809 | 1  | 32,248,172  | 1.64E-12 | 0.208 | 0.208 |  |  |  |                 |         |
| cg15377283 | 8  | 55,371,369  | 0.006227 | 0.208 | 0.200 |  |  |  | <i>SOX17</i>    | Body    |
| cg15416279 | 5  | 3,606,795   | 0.007825 | 0.208 | 0.329 |  |  |  |                 |         |
| cg04101194 | 4  | 25,656,865  | 0.005503 | 0.208 | 0.172 |  |  |  | <i>SLC34A2</i>  | TSS1500 |
| cg15120525 | 3  | 188,108,233 | 0.000357 | 0.208 | 0.205 |  |  |  | <i>LPP</i>      | 5'UTR   |
| cg19954218 | X  | 102,983,556 | 4.69E-05 | 0.208 | 0.173 |  |  |  | <i>GLRA4</i>    | TSS200  |
| cg08241465 | 16 | 57,924,256  | 9.78E-13 | 0.208 | 0.191 |  |  |  | <i>CNGB1</i>    | Body    |
| cg08771171 | 5  | 138,211,084 | 1.01E-05 | 0.208 | 0.192 |  |  |  | <i>CTNNA1</i>   | Body    |
| cg14485643 | 9  | 134,484,581 | 0.029163 | 0.208 | 0.284 |  |  |  | <i>RAPGEF1</i>  | Body    |
| cg19509663 | 4  | 7,863,560   | 1.52E-11 | 0.208 | 0.191 |  |  |  | <i>AFAP1</i>    | Body    |
| cg02689489 | 10 | 31,423,315  | 3.14E-05 | 0.208 | 0.220 |  |  |  |                 |         |
| cg14110969 | 12 | 27,236,884  | 1.75E-11 | 0.208 | 0.214 |  |  |  | <i>C12orf71</i> | TSS1500 |
| cg21838979 | 2  | 106,681,945 | 6.44E-05 | 0.208 | 0.183 |  |  |  | <i>C2orf40</i>  | TSS200  |
| cg01776278 | 7  | 149,472,049 | 4.4E-15  | 0.208 | 0.202 |  |  |  | <i>SSPO</i>     | TSS1500 |
| cg08834922 | 17 | 41,003,236  | 1.06E-06 | 0.208 | 0.241 |  |  |  | <i>AOC3</i>     | 1stExon |
| cg11118413 | 3  | 128,292,699 | 9.25E-06 | 0.208 | 0.222 |  |  |  | <i>C3orf27</i>  | 5'UTR   |
| cg24027397 | 3  | 181,437,712 | 0.027784 | 0.208 | 0.286 |  |  |  | <i>SOX2OT</i>   | Body    |
| cg20321801 | 11 | 2,404,384   | 1.77E-31 | 0.208 | 0.219 |  |  |  | <i>CD81</i>     | Body    |
| cg00590029 | 12 | 114,838,618 | 0.001234 | 0.208 | 0.225 |  |  |  | <i>TBX5</i>     | Body    |
| cg20287434 | 17 | 79,958,592  | 1.12E-05 | 0.208 | 0.209 |  |  |  | <i>ASPSCR1</i>  | Body    |

|            |    |             |          |       |       |           |       |     |                 |         |
|------------|----|-------------|----------|-------|-------|-----------|-------|-----|-----------------|---------|
| cg11574184 | 8  | 145,755,264 | 0.01494  | 0.208 | 0.286 |           |       |     | <i>MGC70857</i> | TSS1500 |
| cg16874347 | 2  | 86,450,216  | 1.08E-08 | 0.208 | 0.197 |           |       |     | <i>REEP1</i>    | Body    |
| cg20338426 | 11 | 86,188,827  | 1.62E-08 | 0.208 | 0.200 |           |       |     | <i>ME3</i>      | Body    |
| cg26486175 | X  | 18,658,942  | 3.76E-06 | 0.208 | 0.184 |           |       |     | <i>CDKL5</i>    | Body    |
| cg03761894 | X  | 71,527,796  | 0.026272 | 0.207 | 0.099 |           |       |     | <i>CITED1</i>   | TSS1500 |
| cg09115473 | 5  | 14,440,991  | 9.63E-05 | 0.207 | 0.182 |           |       |     | <i>TRIO</i>     | Body    |
| cg10741308 | 10 | 97,175,272  | 1.89E-08 | 0.207 | 0.213 |           |       |     | <i>SORBS1</i>   | Body    |
| cg27642470 | 6  | 117,802,710 | 0.000469 | 0.207 | 0.204 |           |       |     | <i>DCBLD1</i>   | TSS1500 |
| cg10454937 | 9  | 96,715,047  | 0.021483 | 0.207 | 0.299 |           |       |     | <i>BARX1</i>    | Body    |
| cg04479757 | 22 | 26,951,319  | 0.004705 | 0.207 | 0.222 |           |       |     | <i>MIR548J</i>  | TSS200  |
| cg04597449 | 5  | 94,955,575  | 0.006696 | 0.207 | 0.160 | 0.0000208 | 0.096 |     | <i>GPR150</i>   | TSS1500 |
| cg17770096 | 12 | 121,078,022 | 2.74E-05 | 0.207 | 0.176 |           |       |     | <i>CABP1</i>    | TSS1500 |
| cg19711579 | 2  | 182,545,562 | 0.007694 | 0.207 | 0.118 |           |       |     | <i>NEUROD1</i>  | TSS200  |
| cg22708902 | 8  | 23,100,981  | 1.26E-09 | 0.207 | 0.184 |           |       |     | <i>CHMP7</i>    | TSS200  |
| cg02316596 | 11 | 120,434,979 | 0.030534 | 0.207 | 0.141 |           |       |     |                 |         |
| cg06971092 | 17 | 35,291,286  | 0.000316 | 0.207 | 0.206 |           |       |     |                 |         |
| cg22377389 | 13 | 20,805,679  | 3.23E-05 | 0.207 | 0.166 | 0.0000206 | 0.051 |     | <i>GJB6</i>     | 5'UTR   |
| cg26891237 | 6  | 36,966,223  | 0.008821 | 0.207 | 0.194 |           |       | Yes |                 |         |
| cg01943874 | 20 | 44,746,944  | 0.000182 | 0.207 | 0.255 |           |       |     | <i>CD40</i>     | 1stExon |
| cg12298688 | 2  | 172,946,691 | 6E-05    | 0.207 | 0.165 |           |       |     |                 |         |
| cg14862395 | 20 | 44,879,700  | 0.01829  | 0.207 | 0.223 |           |       |     | <i>CDH22</i>    | 1stExon |
| cg02851047 | 16 | 2,132,723   | 7.86E-07 | 0.207 | 0.200 |           |       |     | <i>TSC2</i>     | Body    |
| cg16081096 | 3  | 12,980,202  | 5.01E-10 | 0.207 | 0.198 |           |       |     | <i>IQSEC1</i>   | Body    |
| cg19839325 | 19 | 18,761,132  | 2.04E-07 | 0.207 | 0.223 |           |       |     | <i>KLHL26</i>   | Body    |
| cg00156230 | 7  | 45,073,692  | 0.021935 | 0.207 | 0.258 |           |       |     | <i>CCM2</i>     | Body    |
| cg02068015 | 22 | 17,848,581  | 1.77E-13 | 0.207 | 0.202 |           |       |     |                 |         |
| cg04939026 | 7  | 25,898,446  | 0.001689 | 0.207 | 0.199 |           |       |     |                 |         |
| cg21206949 | 14 | 94,595,582  | 0.002476 | 0.207 | 0.277 |           |       |     | <i>IFI27L2</i>  | Body    |
| cg02389040 | 6  | 31,650,786  | 2.68E-09 | 0.207 | 0.208 |           |       |     |                 |         |
| cg08827001 | 11 | 111,384,048 | 0.001991 | 0.207 | 0.225 |           |       |     | <i>BTG4</i>     | TSS1500 |
| cg24788090 | 8  | 74,332,815  | 0.000551 | 0.207 | 0.165 |           |       |     | <i>STAU2</i>    | 3'UTR   |
| cg03034070 | 2  | 190,044,841 | 0.000889 | 0.207 | 0.218 |           |       |     | <i>COL5A2</i>   | TSS1500 |
| cg17436460 | 10 | 17,028,480  | 1.01E-08 | 0.207 | 0.202 |           |       |     | <i>CUBN</i>     | Body    |
| cg24416190 | 4  | 186,007,379 | 9.05E-10 | 0.207 | 0.185 |           |       |     |                 |         |

|            |    |             |          |       |        |          |       |  |                 |         |
|------------|----|-------------|----------|-------|--------|----------|-------|--|-----------------|---------|
| cg04287375 | 10 | 102,490,920 | 0.000281 | 0.207 | 0.122  |          |       |  |                 |         |
| cg11065015 | 20 | 327,170     | 9.23E-07 | 0.207 | 0.123  |          |       |  | <i>NRSN2</i>    | TSS200  |
| cg14524936 | 11 | 20,627,597  | 0.021419 | 0.207 | 0.224  |          |       |  | <i>SLC6A5</i>   | Body    |
| cg18447972 | 17 | 7,036,934   | 0.001388 | 0.207 | 0.203  |          |       |  |                 |         |
| cg23361659 | 2  | 28,914,775  | 5.03E-10 | 0.207 | 0.197  |          |       |  |                 |         |
| cg06970290 | 11 | 64,951,536  | 5.05E-08 | 0.207 | 0.193  |          |       |  | <i>CAPN1</i>    | Body    |
| cg07638450 | 7  | 101,796,416 | 5.83E-05 | 0.207 | 0.183  |          |       |  | <i>CUX1</i>     | Body    |
| cg26973488 | 16 | 67,450,606  | 0.032451 | 0.207 | 0.144  |          |       |  | <i>ZDHC1</i>    | TSS1500 |
| cg12108730 | 16 | 69,141,258  | 0.03135  | 0.207 | 0.221  |          |       |  | <i>HAS3</i>     | 5'UTR   |
| cg20050826 | 12 | 52,995,295  | 2.48E-05 | 0.207 | 0.161  | 1.41E-19 | 0.199 |  | <i>KRT72</i>    | 1stExon |
| cg23072008 | 19 | 38,916,738  | 7.12E-07 | 0.207 | 0.219  |          |       |  | <i>RASGRP4</i>  | 1stExon |
| cg09234582 | 6  | 33,048,286  | 0.035356 | 0.207 | -0.001 |          |       |  | <i>HLA-DPB1</i> | Body    |
| cg15288618 | 3  | 139,257,775 | 5.88E-05 | 0.207 | 0.205  |          |       |  | <i>RBP1</i>     | Body    |
| cg01295034 | 16 | 48,576,092  | 1.92E-15 | 0.207 | 0.189  |          |       |  | <i>N4BP1</i>    | 3'UTR   |
| cg06888460 | 11 | 18,477,303  | 1.99E-05 | 0.207 | 0.164  |          |       |  | <i>LDHAL6A</i>  | TSS200  |
| cg07377446 | 19 | 39,754,498  | 0.01104  | 0.207 | 0.277  |          |       |  |                 |         |
| cg11525285 | 14 | 74,706,336  | 0.008504 | 0.207 | 0.241  | 9.74E-18 | 0.207 |  | <i>VSX2</i>     | 1stExon |
| cg17263206 | 5  | 154,071,247 | 1.81E-06 | 0.207 | 0.194  |          |       |  |                 |         |
| cg18342462 | 11 | 111,385,659 | 0.00222  | 0.207 | 0.153  |          |       |  | <i>C11orf88</i> | 1stExon |
| cg20400838 | 7  | 21,208,923  | 4.01E-07 | 0.207 | 0.217  |          |       |  |                 |         |
| cg26306869 | 1  | 153,522,973 | 0.000113 | 0.207 | 0.238  |          |       |  | <i>S100A3</i>   | TSS1500 |
| cg25935014 | 12 | 103,889,042 | 1.05E-05 | 0.207 | 0.193  |          |       |  | <i>C12orf42</i> | 5'UTR   |
| cg11363230 | 6  | 29,796,351  | 0.022068 | 0.207 | 0.251  |          |       |  | <i>HLA-G</i>    | Body    |
| cg16660891 | 16 | 84,828,913  | 3.61E-15 | 0.207 | 0.184  |          |       |  |                 |         |
| cg22623649 | 8  | 99,179,021  | 6.46E-15 | 0.207 | 0.217  |          |       |  |                 |         |
| cg08167110 | 4  | 152,543,520 | 1.33E-08 | 0.207 | 0.190  |          |       |  | <i>FAM160A1</i> | Body    |
| cg10236603 | 4  | 85,246,175  | 7.43E-08 | 0.207 | 0.181  |          |       |  |                 |         |
| cg24041917 | 1  | 119,535,986 | 0.000543 | 0.207 | 0.231  |          |       |  |                 |         |
| cg12927641 | 6  | 109,611,667 | 1.25E-10 | 0.207 | 0.193  |          |       |  |                 |         |
| cg23890008 | 11 | 20,229,545  | 0.028251 | 0.207 | 0.192  |          |       |  |                 |         |
| cg02485328 | 5  | 158,522,603 | 0.007971 | 0.207 | 0.183  |          |       |  | <i>EBF1</i>     | Body    |
| cg06759629 | 4  | 25,090,198  | 0.012089 | 0.207 | 0.231  |          |       |  |                 |         |
| cg08736225 | 2  | 18,654,908  | 4.59E-08 | 0.207 | 0.186  |          |       |  |                 |         |
| cg20650914 | 13 | 44,627,134  | 3.17E-10 | 0.207 | 0.163  |          |       |  |                 |         |

|            |    |             |          |       |       |  |  |  |                 |         |
|------------|----|-------------|----------|-------|-------|--|--|--|-----------------|---------|
| cg24588381 | 13 | 28,551,145  | 7.71E-07 | 0.207 | 0.193 |  |  |  |                 |         |
| cg14141919 | 2  | 10,572,524  | 0.0119   | 0.207 | 0.182 |  |  |  |                 |         |
| cg17785786 | 4  | 166,414,666 | 0.002782 | 0.207 | 0.278 |  |  |  | <i>CPE</i>      | Body    |
| cg00043510 | 1  | 235,814,134 | 0.049293 | 0.207 | 0.127 |  |  |  | <i>GNG4</i>     | TSS1500 |
| cg03857664 | 5  | 171,864,134 | 7.24E-09 | 0.207 | 0.213 |  |  |  | <i>SH3PXD2B</i> | Body    |
| cg26907472 | 16 | 69,006,828  | 9.2E-12  | 0.207 | 0.199 |  |  |  | <i>TMCO7</i>    | Body    |
| cg02603022 | X  | 39,547,825  | 0.003596 | 0.207 | 0.132 |  |  |  |                 |         |
| cg06246094 | 15 | 42,174,085  | 0.000132 | 0.207 | 0.195 |  |  |  | <i>SPTBN5</i>   | Body    |
| cg14548259 | 12 | 116,946,214 | 0.031976 | 0.207 | 0.189 |  |  |  |                 |         |
| cg06616729 | 8  | 55,379,248  | 0.044026 | 0.207 | 0.274 |  |  |  |                 |         |
| cg10975001 | 1  | 33,627,155  | 1.1E-14  | 0.207 | 0.211 |  |  |  | <i>TRIM62</i>   | Body    |
| cg14750757 | 3  | 127,506,604 | 2.12E-09 | 0.207 | 0.205 |  |  |  | <i>MGLL</i>     | Body    |
| cg15473084 | 5  | 50,265,600  | 0.007227 | 0.207 | 0.198 |  |  |  |                 |         |
| cg24674368 | 14 | 97,879,637  | 0.000774 | 0.207 | 0.254 |  |  |  |                 |         |
| cg07241090 | 12 | 124,864,594 | 4.5E-11  | 0.207 | 0.210 |  |  |  | <i>NCOR2</i>    | Body    |
| cg08679180 | 11 | 73,034,459  | 7.84E-07 | 0.207 | 0.205 |  |  |  | <i>ARHGEF17</i> | Body    |
| cg07494691 | 22 | 44,395,110  | 7.2E-16  | 0.207 | 0.209 |  |  |  | <i>PARVB</i>    | TSS200  |
| cg19796532 | 12 | 50,426,901  | 3.34E-06 | 0.207 | 0.206 |  |  |  |                 |         |
| cg23820828 | 8  | 99,959,602  | 3.08E-07 | 0.207 | 0.197 |  |  |  | <i>OSR2</i>     | 5'UTR   |
| cg23729107 | 17 | 6,679,264   | 0.037836 | 0.207 | 0.300 |  |  |  | <i>FBXO39</i>   | TSS1500 |
| cg06324785 | 22 | 25,960,219  | 3.38E-05 | 0.207 | 0.197 |  |  |  | <i>ADRBK2</i>   | TSS1500 |
| cg09955705 | 8  | 30,253,570  | 0.001137 | 0.207 | 0.223 |  |  |  | <i>RBPM5</i>    | Body    |
| cg14996263 | 12 | 7,046,277   | 6.95E-07 | 0.207 | 0.171 |  |  |  | <i>ATN1</i>     | Body    |
| cg20533899 | 11 | 76,381,105  | 0.000005 | 0.207 | 0.208 |  |  |  | <i>LRR32</i>    | 5'UTR   |
| cg22478317 | 2  | 110,271,930 | 0.001161 | 0.207 | 0.191 |  |  |  |                 |         |
| cg24375215 | 17 | 72,462,559  | 2.51E-08 | 0.207 | 0.186 |  |  |  | <i>CD300A</i>   | 5'UTR   |
| cg00568910 | 1  | 43,429,380  | 1.16E-08 | 0.207 | 0.201 |  |  |  |                 |         |
| cg01236063 | 11 | 16,632,088  | 3.67E-07 | 0.207 | 0.192 |  |  |  |                 |         |
| cg18526607 | 5  | 54,519,307  | 5.09E-05 | 0.207 | 0.190 |  |  |  |                 |         |
| cg00039326 | 1  | 36,615,845  | 4.11E-17 | 0.207 | 0.202 |  |  |  | <i>TRAPPC3</i>  | TSS1500 |
| cg08178072 | 2  | 45,164,495  | 1.33E-06 | 0.207 | 0.205 |  |  |  |                 |         |
| cg08182171 | 11 | 130,291,156 | 2.5E-09  | 0.207 | 0.179 |  |  |  | <i>ADAMTS8</i>  | Body    |
| cg13883479 | 9  | 574,312     | 7.15E-15 | 0.207 | 0.197 |  |  |  | <i>KANK1</i>    | 5'UTR   |
| cg23007325 | 8  | 10,924,633  | 9.57E-08 | 0.207 | 0.195 |  |  |  | <i>XKR6</i>     | Body    |



|            |    |             |          |       |       |  |  |  |                 |         |
|------------|----|-------------|----------|-------|-------|--|--|--|-----------------|---------|
| cg26868345 | 3  | 127,912,642 | 7.54E-15 | 0.207 | 0.199 |  |  |  | <i>EEFSEC</i>   | Body    |
| cg09973986 | 12 | 58,135,973  | 0.008862 | 0.207 | 0.258 |  |  |  | <i>AGAP2</i>    | TSS200  |
| cg20282303 | 1  | 236,924,392 | 9.81E-11 | 0.207 | 0.216 |  |  |  | <i>ACTN2</i>    | Body    |
| cg18852692 | 11 | 58,830,191  | 4.29E-08 | 0.207 | 0.200 |  |  |  |                 |         |
| cg23330450 | 6  | 31,548,285  | 1.96E-06 | 0.207 | 0.196 |  |  |  |                 |         |
| cg25036527 | 22 | 36,123,779  | 8.4E-05  | 0.207 | 0.225 |  |  |  | <i>APOL5</i>    | Body    |
| cg07606495 | 19 | 13,993,318  | 3.86E-11 | 0.207 | 0.196 |  |  |  | <i>C19orf57</i> | 3'UTR   |
| cg13492337 | 8  | 52,722,140  | 2.33E-09 | 0.207 | 0.192 |  |  |  | <i>PXDNL</i>    | TSS200  |
| cg05674437 | 3  | 196,694,153 | 2.02E-12 | 0.207 | 0.179 |  |  |  | <i>PIGZ</i>     | 5'UTR   |
| cg16787652 | 6  | 29,759,955  | 0.011726 | 0.207 | 0.254 |  |  |  | <i>HCG4</i>     | Body    |
| cg00407245 | 19 | 55,598,874  | 6.88E-05 | 0.207 | 0.192 |  |  |  | <i>EPS8L1</i>   | Body    |
| cg00603097 | 18 | 72,125,359  | 0.002257 | 0.207 | 0.180 |  |  |  | <i>FAM69C</i>   | TSS1500 |
| cg03877174 | 17 | 4,923,126   | 2.69E-08 | 0.207 | 0.206 |  |  |  | <i>KIF1C</i>    | Body    |
| cg09229893 | 14 | 54,423,811  | 0.002047 | 0.207 | 0.136 |  |  |  | <i>BMP4</i>     | TSS1500 |
| cg25679766 | 6  | 28,558,113  | 2.91E-06 | 0.207 | 0.206 |  |  |  |                 |         |
| cg11935147 | 1  | 145,075,831 | 5.78E-06 | 0.207 | 0.151 |  |  |  | <i>PDE4DIP</i>  | 1stExon |
| cg08477574 | 19 | 2,219,369   | 2.91E-08 | 0.207 | 0.188 |  |  |  | <i>DOT1L</i>    | Body    |
| cg13445230 | 9  | 89,422,493  | 5.87E-07 | 0.207 | 0.197 |  |  |  |                 |         |
| cg01758314 | 17 | 6,797,034   | 0.00011  | 0.207 | 0.219 |  |  |  | <i>ALOX12P2</i> | Body    |
| cg25016544 | 5  | 72,511,412  | 0.019065 | 0.207 | 0.146 |  |  |  |                 |         |
| cg02013527 | 5  | 88,426,579  | 0.00128  | 0.207 | 0.140 |  |  |  |                 |         |
| cg11715858 | 7  | 1,267,228   | 0.001786 | 0.207 | 0.228 |  |  |  |                 |         |
| cg21547371 | 3  | 52,869,521  | 6.12E-09 | 0.207 | 0.216 |  |  |  | <i>MUSTN1</i>   | TSS1500 |
| cg24706115 | 12 | 110,252,831 | 1.99E-05 | 0.207 | 0.188 |  |  |  | <i>TRPV4</i>    | 5'UTR   |
| cg20732198 | 10 | 35,894,310  | 5.11E-05 | 0.207 | 0.211 |  |  |  | <i>GJD4</i>     | TSS200  |
| cg24335310 | 4  | 85,284,492  | 0.001642 | 0.207 | 0.208 |  |  |  |                 |         |
| cg05155319 | 4  | 109,355,164 | 0.009374 | 0.207 | 0.152 |  |  |  |                 |         |
| cg07405021 | 5  | 115,152,019 | 0.007929 | 0.207 | 0.097 |  |  |  | <i>CDO1</i>     | 1stExon |
| cg17701159 | 8  | 18,705,777  | 6.6E-11  | 0.207 | 0.191 |  |  |  | <i>PSD3</i>     | Body    |
| cg21037008 | 6  | 32,119,939  | 0.012025 | 0.207 | 0.216 |  |  |  | <i>PRRT1</i>    | TSS1500 |
| cg23340218 | 3  | 23,653,462  | 5.83E-08 | 0.207 | 0.226 |  |  |  |                 |         |
| cg23558002 | 13 | 28,553,501  | 0.047323 | 0.207 | 0.265 |  |  |  | <i>PRHOXNB</i>  | Body    |
| cg23893332 | 14 | 94,576,048  | 0.010313 | 0.207 | 0.237 |  |  |  | <i>IFI27</i>    | TSS1500 |
| cg11299854 | 5  | 132,083,184 | 0.000878 | 0.207 | 0.192 |  |  |  | <i>CCNI2</i>    | 1stExon |

|            |    |             |          |       |       |  |  |  |                  |         |
|------------|----|-------------|----------|-------|-------|--|--|--|------------------|---------|
| cg01217071 | 2  | 201,450,323 | 0.01038  | 0.207 | 0.188 |  |  |  | <i>AOX1</i>      | TSS1500 |
| cg00920572 | 12 | 54,349,349  | 0.00244  | 0.207 | 0.234 |  |  |  | <i>HOXC12</i>    | Body    |
| cg19988181 | 10 | 73,478,985  | 9.33E-21 | 0.207 | 0.209 |  |  |  | <i>C10orf105</i> | 5'UTR   |
| cg24399122 | 6  | 70,992,907  | 0.001383 | 0.207 | 0.218 |  |  |  | <i>COL9A1</i>    | Body    |
| cg24834436 | 1  | 54,941,132  | 8.88E-07 | 0.207 | 0.184 |  |  |  |                  |         |
| cg25526039 | 6  | 107,813,291 | 0.002004 | 0.207 | 0.107 |  |  |  | <i>SOBP</i>      | Body    |
| cg05160181 | 1  | 151,694,281 | 0.005347 | 0.207 | 0.219 |  |  |  | <i>C1orf230</i>  | Body    |
| cg02287693 | 22 | 46,276,479  | 7.92E-07 | 0.207 | 0.193 |  |  |  |                  |         |
| cg02642565 | 16 | 4,579,402   | 3.09E-12 | 0.207 | 0.202 |  |  |  | <i>C16orf5</i>   | 5'UTR   |
| cg07052737 | 2  | 26,224,428  | 5.68E-12 | 0.207 | 0.211 |  |  |  |                  |         |
| cg04071779 | 7  | 30,517,627  | 0.039206 | 0.207 | 0.104 |  |  |  | <i>NOD1</i>      | 5'UTR   |
| cg25478114 | 6  | 19,328,477  | 7.85E-12 | 0.207 | 0.171 |  |  |  |                  |         |
| cg03427330 | 13 | 111,465,028 | 0.000176 | 0.207 | 0.160 |  |  |  |                  |         |
| cg21773142 | 7  | 54,612,709  | 0.037545 | 0.207 | 0.181 |  |  |  | <i>VSTM2A</i>    | Body    |
| cg04430911 | 1  | 36,914,349  | 1.22E-06 | 0.207 | 0.197 |  |  |  | <i>OSCP1</i>     | Body    |
| cg06779248 | 7  | 95,458,266  | 3.55E-05 | 0.207 | 0.185 |  |  |  | <i>DYNC111</i>   | Body    |
| cg11148581 | 12 | 123,998,115 | 5.31E-11 | 0.207 | 0.193 |  |  |  | <i>RILPL1</i>    | Body    |
| cg17545182 | 1  | 247,694,041 | 0.000888 | 0.207 | 0.197 |  |  |  | <i>LOC148824</i> | Body    |
| cg20964304 | 11 | 125,040,416 | 1.01E-07 | 0.207 | 0.182 |  |  |  | <i>PKNOX2</i>    | 5'UTR   |
| cg22281697 | 7  | 96,642,037  | 0.029428 | 0.207 | 0.308 |  |  |  | <i>DLX6AS</i>    | Body    |
| cg04902302 | 2  | 175,594,739 | 0.003844 | 0.207 | 0.163 |  |  |  |                  |         |
| cg14041855 | 8  | 1,068,250   | 0.000934 | 0.207 | 0.226 |  |  |  |                  |         |
| cg24027477 | 8  | 53,883,763  | 5.64E-14 | 0.207 | 0.204 |  |  |  |                  |         |
| cg27172287 | 22 | 46,974,976  | 0.004574 | 0.207 | 0.177 |  |  |  |                  |         |
| cg09644157 | 12 | 124,896,212 | 1.21E-09 | 0.207 | 0.187 |  |  |  | <i>NCOR2</i>     | Body    |
| cg00937742 | 2  | 133,429,299 | 4.26E-05 | 0.207 | 0.218 |  |  |  | <i>LYPD1</i>     | TSS1500 |
| cg01641620 | 22 | 50,609,803  | 0.007762 | 0.207 | 0.088 |  |  |  | <i>PANX2</i>     | Body    |
| cg02047051 | 3  | 12,792,283  | 0.000496 | 0.207 | 0.161 |  |  |  | <i>TMEM40</i>    | 5'UTR   |
| cg02193611 | 10 | 23,982,779  | 0.038251 | 0.207 | 0.253 |  |  |  | <i>KIAA1217</i>  | TSS1500 |
| cg02922776 | 1  | 212,420,632 | 2.49E-07 | 0.207 | 0.222 |  |  |  |                  |         |
| cg04404694 | 14 | 37,236,997  | 0.047331 | 0.207 | 0.147 |  |  |  | <i>SLC25A21</i>  | Body    |
| cg08890067 | 17 | 77,478,927  | 0.005576 | 0.207 | 0.214 |  |  |  | <i>HRNBP3</i>    | TSS1500 |
| cg13465852 | 17 | 27,942,115  | 0.00206  | 0.207 | 0.194 |  |  |  | <i>CORO6</i>     | 3'UTR   |
| cg23252784 | X  | 44,203,803  | 5.28E-07 | 0.207 | 0.184 |  |  |  | <i>EFHC2</i>     | TSS1500 |

|            |    |             |          |       |       |          |       |     |                  |         |
|------------|----|-------------|----------|-------|-------|----------|-------|-----|------------------|---------|
| cg09025393 | 1  | 18,438,784  | 0.000971 | 0.207 | 0.165 |          |       |     | <i>IGSF21</i>    | Body    |
| cg04169243 | 14 | 76,200,552  | 1.94E-19 | 0.207 | 0.205 |          |       |     | <i>TLL5</i>      | Body    |
| cg08453458 | 4  | 187,491,428 | 0.030822 | 0.207 | 0.114 |          |       |     |                  |         |
| cg08576476 | 16 | 84,231,032  | 8.28E-06 | 0.207 | 0.184 |          |       |     |                  |         |
| cg10606029 | 5  | 37,952,598  | 8.36E-07 | 0.207 | 0.210 |          |       |     |                  |         |
| cg11967111 | 4  | 24,105,842  | 0.002925 | 0.207 | 0.214 |          |       |     |                  |         |
| cg18767735 | 1  | 54,200,420  | 0.001994 | 0.207 | 0.190 |          |       |     | <i>GLIS1</i>     | TSS1500 |
| cg24132991 | 4  | 186,560,360 | 5.86E-06 | 0.207 | 0.178 |          |       |     | <i>SORBS2</i>    | Body    |
| cg24406619 | 1  | 53,611,984  | 1.43E-09 | 0.207 | 0.177 |          |       |     |                  |         |
| cg24710480 | 6  | 29,717,136  | 0.036762 | 0.207 | 0.171 |          |       |     | <i>LOC285830</i> | TSS1500 |
| cg27074174 | 6  | 101,847,318 | 3.46E-05 | 0.207 | 0.192 |          |       |     | <i>GRIK2</i>     | Body    |
| cg03651478 | 1  | 159,893,671 | 0.01792  | 0.207 | 0.221 |          |       |     | <i>TAGLN2</i>    | 5'UTR   |
| cg00851389 | 16 | 56,669,681  | 6.41E-07 | 0.207 | 0.190 |          |       |     |                  |         |
| cg01838004 | 9  | 100,070,007 | 0.003494 | 0.207 | 0.185 |          |       |     | <i>KIAA1529</i>  | Body    |
| cg27256309 | 19 | 49,220,485  | 8.56E-08 | 0.207 | 0.172 | 5.66E-18 | 0.158 |     | <i>MAMSTR</i>    | TSS1500 |
| cg07207367 | 16 | 67,978,216  | 1.98E-09 | 0.207 | 0.185 |          |       |     | <i>SLC12A4</i>   | 3'UTR   |
| cg14312114 | 17 | 80,571,580  | 0.000337 | 0.207 | 0.186 |          |       |     |                  |         |
| cg01007828 | 16 | 62,070,306  | 0.008253 | 0.207 | 0.117 |          |       |     | <i>CDH8</i>      | TSS1500 |
| cg08151370 | 3  | 43,073,152  | 6.2E-14  | 0.207 | 0.209 |          |       |     | <i>FAM198A</i>   | Body    |
| cg04522045 | 2  | 172,958,324 | 0.001311 | 0.207 | 0.204 |          |       |     |                  |         |
| cg25210835 | 1  | 110,254,828 | 3.32E-06 | 0.207 | 0.207 |          |       |     | <i>GSTM5</i>     | TSS200  |
| cg25378181 | 17 | 79,391,490  | 3.54E-07 | 0.207 | 0.210 |          |       |     | <i>BAHCC1</i>    | Body    |
| cg26839356 | 15 | 99,603,018  | 7.59E-08 | 0.207 | 0.158 |          |       |     |                  |         |
| cg05256204 | 20 | 281,440     | 5.31E-08 | 0.207 | 0.176 |          |       |     |                  |         |
| cg08996805 | 3  | 11,010,256  | 2.77E-06 | 0.207 | 0.216 |          |       |     |                  |         |
| cg10521706 | 2  | 19,556,586  | 3.4E-06  | 0.207 | 0.201 |          |       | Yes | <i>OSR1</i>      | 5'UTR   |
| cg12627726 | 1  | 41,290,409  | 3.08E-11 | 0.207 | 0.197 |          |       |     | <i>KCNQ4</i>     | Body    |
| cg13891181 | 4  | 41,869,086  | 0.01585  | 0.207 | 0.225 |          |       |     |                  |         |
| cg14893857 | 14 | 102,554,969 | 2.74E-06 | 0.207 | 0.197 |          |       |     | <i>HSP90AA1</i>  | TSS1500 |
| cg22233890 | 11 | 36,477,229  | 9.66E-12 | 0.207 | 0.205 |          |       |     | <i>PRR5L</i>     | Body    |
| cg02897366 | 1  | 201,425,990 | 1.9E-06  | 0.207 | 0.198 |          |       |     |                  |         |
| cg05325182 | 19 | 13,915,751  | 3.81E-20 | 0.207 | 0.195 |          |       |     | <i>ZSWIM4</i>    | Body    |
| cg18435832 | 15 | 45,671,155  | 4E-05    | 0.207 | 0.192 |          |       |     | <i>LOC145663</i> | Body    |
| cg23672278 | 1  | 36,787,678  | 9.82E-11 | 0.207 | 0.202 |          |       |     | <i>FAM176B</i>   | 3'UTR   |

|            |    |             |          |       |       |          |       |  |                 |         |
|------------|----|-------------|----------|-------|-------|----------|-------|--|-----------------|---------|
| cg00179196 | 16 | 117,934     | 7.24E-61 | 0.207 | 0.218 |          |       |  | <i>RHBDF1</i>   | 5'UTR   |
| cg08335662 | 14 | 19,614,556  | 2.52E-09 | 0.207 | 0.166 |          |       |  |                 |         |
| cg16714755 | 1  | 149,719,243 | 0.001024 | 0.207 | 0.193 |          |       |  |                 |         |
| cg24064055 | 8  | 145,104,176 | 0.005608 | 0.207 | 0.181 |          |       |  |                 |         |
| cg24420717 | 17 | 42,426,506  | 2.03E-10 | 0.207 | 0.211 |          |       |  | <i>GRN</i>      | 5'UTR   |
| cg27111150 | 10 | 97,183,248  | 4.58E-16 | 0.207 | 0.209 |          |       |  | <i>SORBS1</i>   | Body    |
| cg01527777 | 11 | 71,956,145  | 5.91E-06 | 0.207 | 0.182 |          |       |  | <i>PHOX2A</i>   | TSS1500 |
| cg01974478 | 7  | 4,779,312   | 3.93E-16 | 0.207 | 0.203 |          |       |  | <i>FOXK1</i>    | Body    |
| cg11800620 | 1  | 217,311,993 | 4.53E-06 | 0.207 | 0.190 |          |       |  | <i>ESRRG</i>    | TSS1500 |
| cg14646893 | 6  | 143,592,425 | 3.24E-10 | 0.207 | 0.237 |          |       |  | <i>AIG1</i>     | Body    |
| cg17097923 | 17 | 6,679,541   | 0.004636 | 0.207 | 0.150 |          |       |  | <i>FBXO39</i>   | TSS200  |
| cg18593374 | 10 | 126,302,546 | 1.38E-07 | 0.207 | 0.176 |          |       |  | <i>LHPP</i>     | 3'UTR   |
| cg24354624 | 19 | 40,732,728  | 0.004526 | 0.207 | 0.111 |          |       |  | <i>CNTD2</i>    | TSS200  |
| cg24701772 | 1  | 51,888,961  | 1.13E-13 | 0.207 | 0.211 |          |       |  | <i>EPS15</i>    | TSS1500 |
| cg27252766 | 2  | 42,229,092  | 5.23E-08 | 0.207 | 0.179 |          |       |  |                 |         |
| cg04606076 | 13 | 80,934,105  | 0.00757  | 0.207 | 0.232 |          |       |  |                 |         |
| cg13704086 | 2  | 45,177,125  | 0.013501 | 0.207 | 0.129 |          |       |  |                 |         |
| cg25335190 | 6  | 27,791,899  | 0.002284 | 0.207 | 0.168 |          |       |  | <i>HIST1H4J</i> | TSS200  |
| cg00366103 | 7  | 96,645,019  | 0.002012 | 0.207 | 0.088 |          |       |  |                 |         |
| cg01148781 | 8  | 99,963,021  | 3.43E-08 | 0.207 | 0.200 |          |       |  | <i>OSR2</i>     | Body    |
| cg11368643 | 5  | 140,625,059 | 0.026436 | 0.207 | 0.235 | 2.14E-21 | 0.243 |  | <i>PCDHB15</i>  | TSS200  |
| cg04907257 | 5  | 7,395,318   | 2.22E-08 | 0.207 | 0.198 | 2.76E-09 | 0.094 |  | <i>ADCY2</i>    | TSS1500 |
| cg22108360 | 8  | 124,704,218 | 2.56E-08 | 0.207 | 0.196 |          |       |  | <i>ANXA13</i>   | Body    |
| cg01080902 | 19 | 44,039,870  | 5.51E-05 | 0.207 | 0.187 |          |       |  | <i>ZNF575</i>   | 3'UTR   |
| cg01176947 | 6  | 10,385,279  | 6.18E-05 | 0.207 | 0.186 |          |       |  |                 |         |
| cg04011461 | 16 | 89,638,389  | 2.07E-11 | 0.207 | 0.169 |          |       |  |                 |         |
| cg13010373 | 6  | 86,113,013  | 1.37E-05 | 0.207 | 0.170 |          |       |  |                 |         |
| cg24368383 | 1  | 1,565,856   | 8.18E-05 | 0.207 | 0.216 |          |       |  | <i>MIB2</i>     | Body    |
| cg21433231 | 17 | 34,820,712  | 0.030778 | 0.207 | 0.251 |          |       |  |                 |         |
| cg09565310 | 5  | 112,541,553 | 0.029872 | 0.207 | 0.245 |          |       |  | <i>MCC</i>      | Body    |
| cg19358493 | 10 | 119,300,942 | 0.000558 | 0.207 | 0.170 | 6.71E-20 | 0.204 |  | <i>EMX2</i>     | TSS1500 |
| cg08613577 | 17 | 20,687,698  | 0.000299 | 0.207 | 0.189 |          |       |  |                 |         |
| cg10333402 | 7  | 100,845,647 | 0.002693 | 0.207 | 0.141 |          |       |  | <i>MOGAT3</i>   | TSS1500 |
| cg16047117 | 22 | 42,470,063  | 0.000331 | 0.207 | 0.187 |          |       |  | <i>FAM109B</i>  | TSS200  |

|            |    |             |          |       |       |          |       |  |                |         |
|------------|----|-------------|----------|-------|-------|----------|-------|--|----------------|---------|
| cg19293162 | 19 | 2,513,302   | 4.02E-12 | 0.206 | 0.187 |          |       |  | <i>GNG7</i>    | 3'UTR   |
| cg26360616 | 4  | 128,544,667 | 0.010447 | 0.206 | 0.178 |          |       |  |                |         |
| cg26915924 | 16 | 8,807,043   | 7.35E-13 | 0.206 | 0.208 |          |       |  | <i>ABAT</i>    | 5'UTR   |
| cg12877723 | 8  | 57,358,312  | 1.04E-05 | 0.206 | 0.195 |          |       |  | <i>PENK</i>    | Body    |
| cg03889542 | 3  | 44,039,578  | 0.007895 | 0.206 | 0.185 |          |       |  |                |         |
| cg16818395 | 3  | 128,274,084 | 4.7E-05  | 0.206 | 0.203 |          |       |  |                |         |
| cg14186963 | 1  | 113,051,777 | 0.00287  | 0.206 | 0.199 |          |       |  | <i>WNT2B</i>   | Body    |
| cg03398156 | 2  | 220,154,779 | 9.18E-15 | 0.206 | 0.202 |          |       |  | <i>PTPRN</i>   | 3'UTR   |
| cg14681511 | 5  | 140,805,681 | 0.003157 | 0.206 | 0.239 |          |       |  | <i>PCDHGA4</i> | Body    |
| cg22229828 | 1  | 245,874,647 | 6.32E-11 | 0.206 | 0.192 |          |       |  |                |         |
| cg06342072 | 13 | 50,985,639  | 6.95E-10 | 0.206 | 0.196 |          |       |  |                |         |
| cg08899442 | 5  | 157,398,818 | 0.004726 | 0.206 | 0.232 |          |       |  |                |         |
| cg10574006 | 5  | 123,965,051 | 8.68E-06 | 0.206 | 0.186 |          |       |  |                |         |
| cg14967066 | 11 | 314,341     | 0.008785 | 0.206 | 0.075 |          |       |  | <i>IFITM1</i>  | 1stExon |
| cg17176016 | 6  | 108,441,207 | 7.01E-05 | 0.206 | 0.197 |          |       |  |                |         |
| cg19956155 | 5  | 176,511,416 | 0.005384 | 0.206 | 0.175 |          |       |  |                |         |
| cg23482132 | 2  | 153,415,027 | 1.26E-08 | 0.206 | 0.187 |          |       |  | <i>FMNL2</i>   | Body    |
| cg02166842 | 7  | 55,179,471  | 1.75E-12 | 0.206 | 0.187 |          |       |  | <i>EGFR</i>    | Body    |
| cg26211349 | 17 | 77,404,555  | 4E-05    | 0.206 | 0.167 |          |       |  | <i>HRNBP3</i>  | 5'UTR   |
| cg27353308 | 10 | 133,796,559 | 0.002355 | 0.206 | 0.187 |          |       |  | <i>BNIP3</i>   | TSS1500 |
| cg27443071 | 4  | 190,939,090 | 0.022381 | 0.206 | 0.275 |          |       |  |                |         |
| cg01530283 | 7  | 5,085,252   | 0.011057 | 0.206 | 0.213 |          |       |  | <i>RBAK</i>    | TSS1500 |
| cg06300254 | 10 | 50,822,752  | 0.019476 | 0.206 | 0.215 |          |       |  | <i>CHAT</i>    | Body    |
| cg18059012 | 15 | 44,969,129  | 0.000346 | 0.206 | 0.156 |          |       |  | <i>PATL2</i>   | TSS200  |
| cg19156231 | 12 | 52,115,539  | 6.5E-06  | 0.206 | 0.203 |          |       |  | <i>SCN8A</i>   | Body    |
| cg23684410 | 11 | 116,897,558 | 1.1E-06  | 0.206 | 0.202 |          |       |  | <i>SIK3</i>    | Body    |
| cg05623526 | 11 | 2,548,319   | 3.08E-07 | 0.206 | 0.159 |          |       |  | <i>KCNQ1</i>   | Body    |
| cg11160572 | 4  | 169,706,422 | 6.86E-17 | 0.206 | 0.204 |          |       |  | <i>PALLD</i>   | Body    |
| cg01563071 | 3  | 131,647,680 | 2.03E-05 | 0.206 | 0.192 |          |       |  | <i>CPNE4</i>   | 5'UTR   |
| cg09654247 | 2  | 200,524,002 | 0.001603 | 0.206 | 0.212 |          |       |  |                |         |
| cg15448076 | 12 | 4,380,872   | 0.010834 | 0.206 | 0.222 |          |       |  |                |         |
| cg16404106 | 11 | 86,085,623  | 1.06E-05 | 0.206 | 0.189 | 3.51E-08 | 0.115 |  | <i>CCDC81</i>  | TSS200  |
| cg19918734 | 11 | 86,343,931  | 5.4E-05  | 0.206 | 0.197 |          |       |  | <i>ME3</i>     | Body    |
| cg20287790 | 1  | 53,359,982  | 9.14E-11 | 0.206 | 0.203 |          |       |  | <i>ZYG11A</i>  | 3'UTR   |

|            |    |             |          |       |       |          |       |     |                |         |
|------------|----|-------------|----------|-------|-------|----------|-------|-----|----------------|---------|
| cg00122765 | 17 | 29,457,918  | 1.42E-06 | 0.206 | 0.165 |          |       |     | <i>NF1</i>     | Body    |
| cg02754470 | 15 | 59,157,857  | 2.88E-09 | 0.206 | 0.191 |          |       |     |                |         |
| cg03455555 | 15 | 85,356,531  | 2.73E-07 | 0.206 | 0.204 |          |       |     |                |         |
| cg07428004 | 7  | 127,912,372 | 6.27E-07 | 0.206 | 0.219 |          |       |     |                |         |
| cg20567768 | 8  | 22,082,066  | 6.32E-06 | 0.206 | 0.213 |          |       |     | <i>PHYHIP</i>  | Body    |
| cg00377915 | 10 | 70,631,035  | 4.61E-05 | 0.206 | 0.125 |          |       |     | <i>STOX1</i>   | 5'UTR   |
| cg05127924 | 17 | 18,647,524  | 1.29E-09 | 0.206 | 0.196 | 8.1E-12  | 0.116 |     | <i>FBXW10</i>  | 5'UTR   |
| cg05622577 | 10 | 33,710,900  | 8.04E-09 | 0.206 | 0.191 |          |       |     |                |         |
| cg09510752 | 5  | 134,526,173 | 3.61E-11 | 0.206 | 0.207 |          |       |     |                |         |
| cg19764489 | 11 | 2,730,616   | 1.15E-08 | 0.206 | 0.159 |          |       |     | <i>KCNQ1</i>   | Body    |
| cg08810842 | 8  | 22,548,546  | 0.000149 | 0.206 | 0.201 |          |       |     | <i>EGR3</i>    | Body    |
| cg02872373 | 7  | 129,418,058 | 2.3E-06  | 0.206 | 0.198 |          |       |     |                |         |
| cg10180297 | 16 | 22,827,393  | 8.06E-10 | 0.206 | 0.189 |          |       |     | <i>HS3ST2</i>  | Body    |
| cg15146515 | 19 | 49,250,561  | 2.3E-05  | 0.206 | 0.184 |          |       |     | <i>IZUMO1</i>  | TSS1500 |
| cg24463290 | 10 | 114,922,641 | 1.34E-08 | 0.206 | 0.211 |          |       |     | <i>TCF7L2</i>  | Body    |
| cg10261191 | 11 | 125,364,744 | 2.25E-05 | 0.206 | 0.202 | 2.48E-15 | 0.162 |     | <i>FEZ1</i>    | 5'UTR   |
| cg10513330 | 2  | 28,829,939  | 7.94E-09 | 0.206 | 0.216 |          |       |     | <i>PLB1</i>    | Body    |
| cg12438547 | 13 | 100,642,971 | 6.86E-05 | 0.206 | 0.185 |          |       |     |                |         |
| cg18735956 | 6  | 34,113,908  | 0.000612 | 0.206 | 0.227 |          |       |     |                |         |
| cg21563049 | 22 | 18,386,798  | 3.03E-08 | 0.206 | 0.179 |          |       | Yes | <i>MICAL3</i>  | Body    |
| cg00393837 | 2  | 105,470,050 | 0.012825 | 0.206 | 0.205 |          |       |     |                |         |
| cg26077454 | 14 | 95,240,500  | 0.003361 | 0.206 | 0.218 |          |       |     |                |         |
| cg02816297 | 12 | 56,224,411  | 0.040566 | 0.206 | 0.117 |          |       |     | <i>DNAJC14</i> | TSS1500 |
| cg11463505 | 5  | 1,841,594   | 0.000741 | 0.206 | 0.135 |          |       |     |                |         |
| cg00049664 | 16 | 66,613,334  | 3.62E-05 | 0.206 | 0.195 |          |       |     | <i>CMTM2</i>   | TSS200  |
| cg02584537 | 10 | 131,569,018 | 2.03E-15 | 0.206 | 0.187 |          |       |     |                |         |
| cg05279738 | 3  | 141,560,204 | 0.005139 | 0.206 | 0.205 |          |       |     |                |         |
| cg20180247 | 6  | 10,884,140  | 0.001222 | 0.206 | 0.220 |          |       |     |                |         |
| cg26648103 | 11 | 66,791,718  | 1.33E-06 | 0.206 | 0.182 |          |       |     | <i>SYT12</i>   | 5'UTR   |
| cg14914254 | 6  | 29,796,370  | 0.0002   | 0.206 | 0.231 |          |       |     | <i>HLA-G</i>   | Body    |
| cg20029201 | 11 | 118,781,813 | 0.012148 | 0.206 | 0.231 | 5.75E-19 | 0.167 |     | <i>BCL9L</i>   | TSS1500 |
| cg20248093 | 17 | 77,722,496  | 4.2E-05  | 0.206 | 0.204 |          |       |     |                |         |
| cg24713770 | 1  | 20,649,959  | 1.13E-30 | 0.206 | 0.197 |          |       |     | <i>VWA5B1</i>  | Body    |
| cg14644871 | 7  | 26,192,756  | 0.015504 | 0.206 | 0.073 |          |       |     | <i>NFE2L3</i>  | Body    |

|            |    |             |          |       |       |         |       |     |                 |         |
|------------|----|-------------|----------|-------|-------|---------|-------|-----|-----------------|---------|
| cg19715111 | 2  | 224,904,683 | 0.002145 | 0.206 | 0.129 |         |       |     | <i>SERPINE2</i> | TSS1500 |
| cg00116092 | 1  | 217,313,044 | 0.000192 | 0.206 | 0.190 |         |       |     |                 |         |
| cg04768697 | 19 | 15,122,135  | 0.001261 | 0.206 | 0.192 |         |       |     | <i>CCDC105</i>  | 1stExon |
| cg11077681 | 11 | 10,715,188  | 3.62E-05 | 0.206 | 0.169 |         |       |     | <i>MRVI1</i>    | 1stExon |
| cg11828163 | 7  | 5,531,009   | 3.71E-18 | 0.206 | 0.201 |         |       |     | <i>FBXL18</i>   | Body    |
| cg16072884 | 10 | 30,317,625  | 3.06E-08 | 0.206 | 0.206 |         |       |     | <i>KIAA1462</i> | Body    |
| cg17406359 | 21 | 45,773,189  | 8.76E-06 | 0.206 | 0.239 |         |       |     | <i>TRPM2</i>    | TSS1500 |
| cg01414464 | 5  | 113,695,858 | 1.32E-06 | 0.206 | 0.229 |         |       |     |                 |         |
| cg01579841 | 6  | 166,400,494 | 0.009584 | 0.206 | 0.120 |         |       |     | <i>C6orf176</i> | Body    |
| cg04270489 | 11 | 85,827,505  | 0.000178 | 0.206 | 0.194 |         |       |     |                 |         |
| cg20411935 | 1  | 228,653,095 | 0.009968 | 0.206 | 0.291 |         |       |     |                 |         |
| cg22462240 | 17 | 76,962,663  | 9.2E-12  | 0.206 | 0.199 |         |       |     |                 |         |
| cg27504292 | 12 | 124,779,532 | 0.017807 | 0.206 | 0.145 |         |       |     | <i>FAM101A</i>  | 5'UTR   |
| cg10036013 | 7  | 4,778,839   | 2.98E-11 | 0.206 | 0.210 |         |       |     | <i>FOXK1</i>    | Body    |
| cg12912690 | 2  | 239,197,457 | 2.27E-06 | 0.206 | 0.191 |         |       |     | <i>PER2</i>     | TSS1500 |
| cg17953300 | 11 | 65,418,265  | 2.59E-05 | 0.206 | 0.156 |         |       |     | <i>SIPA1</i>    | 3'UTR   |
| cg01906015 | 8  | 63,161,579  | 0.039458 | 0.206 | 0.118 |         |       |     | <i>NKAIN3</i>   | 1stExon |
| cg13398027 | 18 | 46,447,840  | 8.48E-10 | 0.206 | 0.212 |         |       |     | <i>SMAD7</i>    | Body    |
| cg18864124 | 2  | 227,288,863 | 0.01631  | 0.206 | 0.193 |         |       |     |                 |         |
| cg20288617 | 4  | 22,239,907  | 0.001242 | 0.206 | 0.167 |         |       | Yes |                 |         |
| cg13366470 | 15 | 81,666,512  | 8.05E-11 | 0.206 | 0.202 |         |       |     | <i>TMC3</i>     | TSS200  |
| cg14157578 | 9  | 110,764,967 | 2.46E-07 | 0.206 | 0.205 |         |       |     |                 |         |
| cg04064452 | 2  | 242,486,462 | 0.015278 | 0.206 | 0.171 |         |       |     |                 |         |
| cg00260012 | 2  | 31,031,702  | 9.84E-18 | 0.206 | 0.191 |         |       |     | <i>CAPN13</i>   | TSS1500 |
| cg02269978 | 6  | 32,847,585  | 0.003646 | 0.206 | 0.255 |         |       |     | <i>PPP1R2P1</i> | Body    |
| cg14663965 | 6  | 108,495,385 | 5.36E-05 | 0.206 | 0.213 |         |       |     | <i>NR2E1</i>    | Body    |
| cg25556330 | 7  | 27,279,575  | 3.32E-07 | 0.206 | 0.200 |         |       |     |                 |         |
| cg26128383 | 6  | 31,239,158  | 0.011868 | 0.206 | 0.183 |         |       |     | <i>HLA-C</i>    | Body    |
| cg15786205 | 6  | 108,495,578 | 7.44E-05 | 0.206 | 0.207 |         |       |     | <i>NR2E1</i>    | Body    |
| cg20536364 | 5  | 55,790,102  | 2.1E-10  | 0.206 | 0.185 |         |       |     |                 |         |
| cg02194717 | 11 | 70,415,188  | 8.27E-08 | 0.206 | 0.172 |         |       |     | <i>SHANK2</i>   | Body    |
| cg22700686 | 1  | 153,538,764 | 7.02E-07 | 0.206 | 0.201 |         |       |     | <i>S100A2</i>   | TSS1500 |
| cg06339657 | 5  | 76,505,932  | 0.006854 | 0.206 | 0.120 | 7.1E-13 | 0.174 |     | <i>PDE8B</i>    | TSS1500 |
| cg08454563 | 22 | 31,040,187  | 5.3E-06  | 0.206 | 0.204 |         |       |     | <i>SLC35E4</i>  | Body    |

|            |    |             |          |       |       |           |       |  |                 |         |
|------------|----|-------------|----------|-------|-------|-----------|-------|--|-----------------|---------|
| cg08794544 | 11 | 45,825,518  | 0.000478 | 0.206 | 0.137 |           |       |  | <i>SLC35C1</i>  | TSS200  |
| cg10148591 | 19 | 7,197,021   | 0.000174 | 0.206 | 0.231 |           |       |  | <i>INSR</i>     | Body    |
| cg01621716 | 2  | 11,636,147  | 1.01E-05 | 0.206 | 0.179 |           |       |  |                 |         |
| cg03111114 | 5  | 149,886,185 | 3.16E-09 | 0.206 | 0.190 |           |       |  | <i>NDST1</i>    | TSS1500 |
| cg07337793 | 2  | 43,038,584  | 0.016873 | 0.206 | 0.117 |           |       |  |                 |         |
| cg03173722 | 4  | 71,587,640  | 3.71E-05 | 0.206 | 0.217 | 0.0000256 | 0.102 |  | <i>RUFY3</i>    | Body    |
| cg03401297 | 19 | 41,025,959  | 9.74E-06 | 0.206 | 0.160 |           |       |  | <i>SPTBN4</i>   | Body    |
| cg07835443 | 16 | 89,734,986  | 7.48E-06 | 0.206 | 0.158 |           |       |  | <i>C16orf55</i> | Body    |
| cg01701634 | 19 | 51,876,119  | 5.58E-06 | 0.206 | 0.189 |           |       |  | <i>NKG7</i>     | TSS200  |
| cg26282505 | 15 | 90,171,693  | 1.91E-12 | 0.206 | 0.209 |           |       |  | <i>KIF7</i>     | Body    |
| cg00351781 | 17 | 17,709,007  | 1.64E-08 | 0.206 | 0.190 |           |       |  | <i>RAI1</i>     | Body    |
| cg00734629 | 7  | 128,471,146 | 2.11E-07 | 0.206 | 0.191 |           |       |  | <i>FLNC</i>     | Body    |
| cg04010586 | 1  | 36,788,436  | 2.19E-05 | 0.206 | 0.221 |           |       |  | <i>FAM176B</i>  | Body    |
| cg07606234 | 14 | 24,551,147  | 0.004894 | 0.206 | 0.091 |           |       |  | <i>NRL</i>      | Body    |
| cg09403249 | 12 | 45,444,203  | 4.41E-05 | 0.206 | 0.188 |           |       |  | <i>DBX2</i>     | Body    |
| cg23418510 | 10 | 25,240,660  | 0.000951 | 0.206 | 0.215 |           |       |  | <i>PRTFDC1</i>  | Body    |
| cg03117611 | 12 | 125,223,679 | 3.92E-10 | 0.206 | 0.185 |           |       |  |                 |         |
| cg06637618 | 1  | 203,595,048 | 5.25E-06 | 0.206 | 0.170 |           |       |  | <i>ATP2B4</i>   | TSS1500 |
| cg10065736 | 12 | 117,440,120 | 2.04E-13 | 0.206 | 0.175 |           |       |  | <i>FBXW8</i>    | Body    |
| cg19260084 | 12 | 103,349,055 | 0.004395 | 0.206 | 0.188 |           |       |  |                 |         |
| cg27109912 | 17 | 38,707,719  | 0.021028 | 0.206 | 0.242 |           |       |  |                 |         |
| cg10942097 | 2  | 176,947,435 | 0.00561  | 0.206 | 0.209 |           |       |  | <i>EVX2</i>     | Body    |
| cg11380483 | 2  | 127,933,992 | 0.003324 | 0.206 | 0.195 |           |       |  |                 |         |
| cg13304825 | 17 | 79,297,548  | 0.000373 | 0.206 | 0.219 |           |       |  | <i>TMEM105</i>  | 5'UTR   |
| cg15270350 | 17 | 76,215,886  | 9.36E-07 | 0.206 | 0.167 |           |       |  | <i>BIRC5</i>    | Body    |
| cg26577252 | 15 | 99,212,332  | 0.01784  | 0.206 | 0.213 |           |       |  | <i>IGF1R</i>    | Body    |
| cg06126335 | 7  | 73,497,616  | 1.9E-06  | 0.206 | 0.195 |           |       |  | <i>LIMK1</i>    | TSS1500 |
| cg07105272 | 3  | 186,490,785 | 1.11E-05 | 0.206 | 0.207 |           |       |  |                 |         |
| cg09294347 | 2  | 1,286,397   | 0.000163 | 0.206 | 0.130 |           |       |  | <i>SNTG2</i>    | Body    |
| cg16158779 | 11 | 113,258,455 | 0.01859  | 0.206 | 0.141 |           |       |  | <i>ANKK1</i>    | TSS200  |
| cg23208513 | 8  | 101,118,377 | 0.004346 | 0.206 | 0.225 |           |       |  | <i>RGS22</i>    | TSS200  |
| cg24399395 | 21 | 34,392,203  | 0.040657 | 0.206 | 0.176 |           |       |  |                 |         |
| cg00194126 | 2  | 157,186,312 | 0.000556 | 0.206 | 0.193 |           |       |  | <i>NR4A2</i>    | Body    |
| cg00139681 | 7  | 106,125,168 | 6.1E-05  | 0.206 | 0.213 |           |       |  |                 |         |



|            |    |             |          |       |       |         |       |     |                  |         |
|------------|----|-------------|----------|-------|-------|---------|-------|-----|------------------|---------|
| cg07548372 | 14 | 24,848,202  | 3.72E-05 | 0.206 | 0.200 |         |       | Yes | <i>NFATC4</i>    | 3'UTR   |
| cg22306749 | X  | 101,967,085 | 0.037937 | 0.206 | 0.177 |         |       |     | <i>GPRASP2</i>   | TSS1500 |
| cg23045073 | 1  | 179,545,458 | 0.00022  | 0.206 | 0.146 |         |       |     | <i>NPHS2</i>     | TSS1500 |
| cg00151271 | 4  | 7,872,993   | 3.5E-07  | 0.206 | 0.171 |         |       |     | <i>AFAP1</i>     | Body    |
| cg08153621 | 19 | 53,561,441  | 1.9E-05  | 0.206 | 0.197 |         |       |     |                  |         |
| cg10443421 | 16 | 56,644,991  | 1.25E-07 | 0.206 | 0.211 |         |       |     |                  |         |
| cg13858742 | 1  | 204,621,504 | 7.58E-09 | 0.206 | 0.184 |         |       |     | <i>LRRN2</i>     | 5'UTR   |
| cg25851789 | 1  | 217,309,794 | 8.01E-07 | 0.206 | 0.211 |         |       |     | <i>ESRRG</i>     | 5'UTR   |
| cg00745835 | 10 | 80,778,842  | 1.15E-10 | 0.206 | 0.193 |         |       |     | <i>LOC283050</i> | Body    |
| cg06027057 | 14 | 90,849,959  | 0.00353  | 0.206 | 0.173 |         |       |     |                  |         |
| cg08439439 | 6  | 149,190,883 | 2.45E-12 | 0.206 | 0.212 |         |       |     | <i>UST</i>       | Body    |
| cg08755224 | 20 | 21,001,116  | 2.47E-09 | 0.206 | 0.205 |         |       |     |                  |         |
| cg16444607 | 2  | 173,061,858 | 0.000968 | 0.206 | 0.173 |         |       | Yes |                  |         |
| cg09511126 | 10 | 100,993,597 | 0.001291 | 0.206 | 0.209 |         |       |     | <i>HPSE2</i>     | Body    |
| cg12559119 | 17 | 63,590,575  | 1.01E-07 | 0.206 | 0.196 |         |       |     |                  |         |
| cg22886323 | 15 | 100,782,544 | 3.54E-12 | 0.206 | 0.210 |         |       |     | <i>ADAMTS17</i>  | Body    |
| cg26127114 | 11 | 12,419,483  | 1.97E-08 | 0.206 | 0.193 |         |       |     | <i>PARVA</i>     | Body    |
| cg12041266 | 11 | 75,050,147  | 8.3E-15  | 0.206 | 0.205 |         |       | Yes | <i>ARRB1</i>     | Body    |
| cg04109661 | X  | 133,680,249 | 3.27E-09 | 0.206 | 0.188 |         |       |     | <i>MGC16121</i>  | Body    |
| cg23877720 | 7  | 49,815,117  | 0.00024  | 0.206 | 0.302 |         |       |     | <i>VWC2</i>      | Body    |
| cg25196088 | 1  | 7,703,835   | 1.29E-08 | 0.206 | 0.194 |         |       |     | <i>CAMTA1</i>    | Body    |
| cg16603596 | 12 | 8,855,125   | 5.54E-08 | 0.206 | 0.209 |         |       |     | <i>RIMKLB</i>    | 5'UTR   |
| cg07005055 | 1  | 113,052,167 | 0.004793 | 0.206 | 0.225 |         |       |     | <i>WNT2B</i>     | Body    |
| cg13085980 | 12 | 94,544,425  | 0.006043 | 0.206 | 0.247 |         |       |     | <i>PLXNC1</i>    | Body    |
| cg00831931 | 10 | 114,823,094 | 1.76E-20 | 0.206 | 0.186 |         |       |     | <i>TCF7L2</i>    | Body    |
| cg02912316 | 1  | 32,527,924  | 8.35E-15 | 0.206 | 0.202 |         |       |     |                  |         |
| cg05124918 | 12 | 52,473,462  | 3.16E-13 | 0.206 | 0.185 |         |       |     |                  |         |
| cg22341104 | 1  | 92,952,261  | 0.031398 | 0.206 | 0.143 | 8.7E-20 | 0.162 |     | <i>GFI1</i>      | TSS1500 |
| cg24126768 | 17 | 53,645,286  | 0.006946 | 0.206 | 0.196 |         |       |     |                  |         |
| cg25563256 | 17 | 7,341,641   | 0.016631 | 0.206 | 0.217 |         |       |     | <i>FGF11</i>     | TSS1500 |
| cg08309529 | 7  | 156,797,833 | 0.027864 | 0.206 | 0.203 |         |       |     | <i>MXN1</i>      | 3'UTR   |
| cg09193791 | 11 | 117,740,722 | 0.001048 | 0.206 | 0.183 |         |       |     | <i>FXND6</i>     | 5'UTR   |
| cg16626322 | 17 | 78,439,556  | 1.08E-05 | 0.206 | 0.170 |         |       |     |                  |         |
| cg18745629 | 3  | 57,163,527  | 5.22E-14 | 0.206 | 0.196 |         |       |     | <i>IL17RD</i>    | Body    |

|            |    |             |          |       |       |          |       |  |                |         |
|------------|----|-------------|----------|-------|-------|----------|-------|--|----------------|---------|
| cg14245228 | 9  | 135,619,345 | 4.91E-10 | 0.206 | 0.191 |          |       |  | <i>C9orf98</i> | Body    |
| cg16742873 | 4  | 13,544,632  | 2.98E-10 | 0.206 | 0.187 |          |       |  | <i>NKX3-2</i>  | Body    |
| cg22728904 | 7  | 100,433,983 | 0.03651  | 0.206 | 0.151 |          |       |  |                |         |
| cg24371574 | 1  | 230,428,167 | 9.06E-12 | 0.206 | 0.202 |          |       |  |                |         |
| cg25320816 | 13 | 114,099,871 | 7.53E-08 | 0.206 | 0.194 |          |       |  | <i>ADPRHL1</i> | 5'UTR   |
| cg25353281 | 2  | 219,155,378 | 0.007689 | 0.206 | 0.269 |          |       |  | <i>PNKD</i>    | Body    |
| cg01795122 | 19 | 48,828,859  | 0.017948 | 0.206 | 0.184 | 5.72E-15 | 0.141 |  | <i>EMP3</i>    | 1stExon |
| cg00816770 | 4  | 144,621,089 | 0.000163 | 0.206 | 0.183 |          |       |  | <i>FREM3</i>   | 1stExon |
| cg13917662 | 13 | 100,548,513 | 9.64E-07 | 0.206 | 0.186 |          |       |  | <i>CLYBL</i>   | 3'UTR   |
| cg21443659 | 2  | 217,745,721 | 8.08E-07 | 0.206 | 0.190 |          |       |  |                |         |
| cg03564201 | 3  | 42,948,169  | 2.36E-06 | 0.206 | 0.179 |          |       |  | <i>ZNF662</i>  | 5'UTR   |
| cg05951817 | 17 | 28,562,142  | 5.67E-06 | 0.206 | 0.206 |          |       |  | <i>SLC6A4</i>  | 5'UTR   |
| cg13654588 | 10 | 120,354,081 | 0.013848 | 0.206 | 0.126 |          |       |  | <i>PRLHR</i>   | Body    |
| cg14425869 | 9  | 98,343,728  | 6.4E-10  | 0.206 | 0.208 |          |       |  |                |         |
| cg21279316 | 15 | 64,915,229  | 3.97E-05 | 0.206 | 0.175 |          |       |  | <i>ZNF609</i>  | Body    |
| cg15523463 | 5  | 150,804,815 | 1.06E-14 | 0.206 | 0.198 |          |       |  |                |         |
| cg23678594 | 1  | 1,712,021   | 1.48E-06 | 0.206 | 0.204 |          |       |  |                |         |
| cg00111335 | 8  | 593,194     | 6.78E-13 | 0.206 | 0.168 |          |       |  |                |         |
| cg12747860 | 6  | 3,229,027   | 0.007554 | 0.206 | 0.279 |          |       |  | <i>TUBB2B</i>  | TSS1500 |
| cg14468280 | 20 | 47,862,976  | 2.14E-11 | 0.206 | 0.220 |          |       |  | <i>ZNFX1</i>   | 3'UTR   |
| cg16077226 | 11 | 62,156,701  | 8.64E-13 | 0.206 | 0.188 |          |       |  | <i>ASRGL1</i>  | Body    |
| cg17338816 | 7  | 2,607,424   | 0.00014  | 0.206 | 0.146 |          |       |  | <i>IQCE</i>    | Body    |
| cg01032119 | 5  | 10,857,295  | 0.025881 | 0.206 | 0.174 |          |       |  |                |         |
| cg05324789 | 10 | 134,602,475 | 0.000842 | 0.206 | 0.142 |          |       |  |                |         |
| cg06159269 | 1  | 8,767,347   | 0.004339 | 0.206 | 0.199 |          |       |  | <i>RERE</i>    | 5'UTR   |
| cg07770854 | 19 | 4,607,057   | 0.016173 | 0.206 | 0.151 |          |       |  |                |         |
| cg10552473 | 2  | 206,525,681 | 2.27E-07 | 0.206 | 0.217 |          |       |  |                |         |
| cg18601426 | 7  | 158,381,220 | 2.63E-05 | 0.206 | 0.193 | 2.9E-22  | 0.139 |  | <i>PTPRN2</i>  | TSS1500 |
| cg04656222 | 17 | 7,690,529   | 3.76E-05 | 0.206 | 0.221 |          |       |  | <i>DNAH2</i>   | Body    |
| cg08328750 | 17 | 39,675,355  | 0.003874 | 0.206 | 0.139 |          |       |  | <i>KRT15</i>   | TSS200  |
| cg13071508 | 1  | 24,373,210  | 0.000129 | 0.206 | 0.204 |          |       |  |                |         |
| cg19803052 | 7  | 19,813,244  | 0.002579 | 0.206 | 0.154 |          |       |  | <i>TMEM196</i> | TSS1500 |
| cg21210090 | 4  | 15,704,429  | 0.010308 | 0.206 | 0.198 |          |       |  | <i>BST1</i>    | TSS200  |
| cg21893358 | 11 | 120,434,880 | 0.025389 | 0.206 | 0.150 |          |       |  |                |         |

|            |    |             |          |       |       |  |  |  |                 |         |
|------------|----|-------------|----------|-------|-------|--|--|--|-----------------|---------|
| cg22354782 | 1  | 115,881,132 | 0.000305 | 0.206 | 0.168 |  |  |  | <i>NGF</i>      | TSS1500 |
| cg00157572 | 14 | 60,977,961  | 0.023144 | 0.206 | 0.183 |  |  |  | <i>SIX6</i>     | Body    |
| cg02211449 | 10 | 110,671,609 | 0.018336 | 0.206 | 0.257 |  |  |  |                 |         |
| cg06629734 | 6  | 39,017,116  | 2.28E-05 | 0.206 | 0.211 |  |  |  | <i>GLP1R</i>    | Body    |
| cg12854186 | 6  | 32,805,398  | 3.49E-09 | 0.206 | 0.166 |  |  |  | <i>TAP2</i>     | Body    |
| cg17111846 | 1  | 51,567,810  | 3.35E-08 | 0.206 | 0.203 |  |  |  | <i>C1orf185</i> | TSS200  |
| cg20253872 | 1  | 110,166,571 | 2.54E-09 | 0.206 | 0.193 |  |  |  | <i>AMPD2</i>    | Body    |
| cg21923770 | 17 | 1,183,159   | 1.67E-05 | 0.206 | 0.254 |  |  |  | <i>TUSC5</i>    | 1stExon |
| cg22854985 | 2  | 174,082,101 | 9.35E-05 | 0.206 | 0.146 |  |  |  | <i>ZAK</i>      | Body    |
| cg05349542 | 10 | 88,127,572  | 0.000923 | 0.206 | 0.172 |  |  |  | <i>GRID1</i>    | TSS1500 |
| cg11329482 | 12 | 91,493,337  | 2.05E-05 | 0.206 | 0.206 |  |  |  |                 |         |
| cg13053653 | 2  | 177,037,631 | 0.000588 | 0.206 | 0.174 |  |  |  | <i>HOXD3</i>    | 3'UTR   |
| cg13906792 | 15 | 75,199,810  | 7.51E-07 | 0.206 | 0.188 |  |  |  | <i>C15orf17</i> | TSS1500 |
| cg14063488 | 4  | 154,709,878 | 0.042869 | 0.206 | 0.288 |  |  |  | <i>SFRP2</i>    | 1stExon |
| cg17198308 | 12 | 6,665,108   | 0.000363 | 0.206 | 0.193 |  |  |  | <i>IFFO1</i>    | 1stExon |
| cg03316237 | 19 | 45,738,857  | 0.019302 | 0.206 | 0.144 |  |  |  | <i>EXOC3L2</i>  | TSS1500 |
| cg04153489 | 8  | 41,655,983  | 2.22E-05 | 0.206 | 0.160 |  |  |  | <i>ANK1</i>     | TSS1500 |
| cg05106770 | 4  | 128,545,193 | 0.001158 | 0.206 | 0.216 |  |  |  |                 |         |
| cg17261676 | 6  | 26,016,808  | 1.35E-07 | 0.206 | 0.227 |  |  |  |                 |         |
| cg17786894 | 2  | 65,131,556  | 4.88E-08 | 0.206 | 0.205 |  |  |  |                 |         |
| cg02275784 | 11 | 85,242,554  | 0.000107 | 0.206 | 0.151 |  |  |  | <i>DLG2</i>     | Body    |
| cg03337093 | 9  | 135,463,171 | 3.8E-05  | 0.206 | 0.217 |  |  |  | <i>BARHL1</i>   | Body    |
| cg16886175 | 7  | 114,562,063 | 0.011282 | 0.206 | 0.163 |  |  |  | <i>MDFIC</i>    | TSS200  |
| cg24211976 | 15 | 60,285,744  | 0.000333 | 0.206 | 0.216 |  |  |  |                 |         |
| cg03434029 | 1  | 45,274,048  | 0.00275  | 0.206 | 0.255 |  |  |  | <i>TCTEX1D4</i> | TSS1500 |
| cg11353647 | 7  | 158,243,730 | 8.16E-11 | 0.206 | 0.202 |  |  |  | <i>PTPRN2</i>   | Body    |
| cg13814747 | 15 | 31,373,178  | 6.74E-06 | 0.206 | 0.179 |  |  |  | <i>TRPM1</i>    | 5'UTR   |
| cg20051292 | 8  | 101,118,512 | 0.006133 | 0.206 | 0.287 |  |  |  | <i>RGS22</i>    | TSS200  |
| cg04333575 | 11 | 6,340,890   | 0.000414 | 0.206 | 0.232 |  |  |  | <i>PRKCDBP</i>  | Body    |
| cg15986413 | 2  | 233,352,776 | 2.01E-08 | 0.206 | 0.149 |  |  |  | <i>ECEL1</i>    | TSS1500 |
| cg06615940 | 1  | 110,211,023 | 1.06E-18 | 0.206 | 0.198 |  |  |  | <i>GSTM2</i>    | Body    |
| cg11324538 | 19 | 47,778,804  | 7.09E-14 | 0.206 | 0.173 |  |  |  | <i>PRR24</i>    | 3'UTR   |
| cg14934253 | 6  | 108,436,768 | 0.035354 | 0.206 | 0.279 |  |  |  |                 |         |
| cg24826644 | 6  | 30,457,240  | 2.82E-06 | 0.206 | 0.204 |  |  |  | <i>HLA-E</i>    | TSS200  |

|            |    |             |          |       |       |            |       |     |  |                |         |
|------------|----|-------------|----------|-------|-------|------------|-------|-----|--|----------------|---------|
| cg03607638 | 3  | 193,788,482 | 0.013971 | 0.206 | 0.118 |            |       |     |  |                |         |
| cg04961101 | 20 | 37,303,484  | 0.004322 | 0.206 | 0.167 |            |       |     |  |                |         |
| cg06335918 | 11 | 62,610,003  | 0.002453 | 0.206 | 0.184 |            |       |     |  |                |         |
| cg14838970 | 11 | 7,533,817   | 1.73E-05 | 0.206 | 0.151 |            |       |     |  | <i>PPFIBP2</i> | TSS1500 |
| cg02809707 | 2  | 175,191,069 | 0.016718 | 0.206 | 0.219 |            |       |     |  |                |         |
| cg19842809 | 14 | 37,125,997  | 0.000825 | 0.206 | 0.220 |            |       |     |  | <i>PAX9</i>    | TSS1500 |
| cg20372666 | 10 | 71,149,910  | 3.53E-07 | 0.206 | 0.192 |            |       |     |  | <i>HK1</i>     | Body    |
| cg21644489 | 15 | 63,312,170  | 3.17E-08 | 0.206 | 0.192 |            |       |     |  |                |         |
| cg06706550 | 22 | 45,125,480  | 8.62E-08 | 0.206 | 0.208 |            |       |     |  | <i>PRR5</i>    | Body    |
| cg18939596 | 14 | 95,330,880  | 1.44E-05 | 0.206 | 0.201 |            |       |     |  |                |         |
| cg05053440 | 1  | 227,748,442 | 3.69E-06 | 0.206 | 0.195 |            |       |     |  |                |         |
| cg21116457 | 18 | 43,304,007  | 1.47E-05 | 0.206 | 0.235 |            |       |     |  | <i>SLC14A1</i> | TSS200  |
| cg04470072 | 8  | 87,082,014  | 0.001695 | 0.206 | 0.221 |            |       |     |  | <i>PSKH2</i>   | TSS200  |
| cg14839558 | 1  | 1,874,488   | 2.15E-18 | 0.206 | 0.191 |            |       |     |  |                |         |
| cg15036894 | 5  | 16,539,535  | 1.02E-06 | 0.206 | 0.207 |            |       |     |  | <i>FAM134B</i> | Body    |
| cg22537334 | 15 | 70,354,691  | 2.65E-08 | 0.206 | 0.190 |            |       |     |  | <i>TLE3</i>    | Body    |
| cg23674882 | 2  | 74,780,272  | 1.7E-09  | 0.206 | 0.211 | 5.8887E-05 | 0.061 |     |  | <i>LOXL3</i>   | 5'UTR   |
| cg01613249 | 2  | 54,727,293  | 1.47E-07 | 0.206 | 0.220 |            |       |     |  | <i>SPTBN1</i>  | 5'UTR   |
| cg05630111 | 1  | 150,948,030 | 2.36E-07 | 0.206 | 0.199 |            |       |     |  | <i>LASS2</i>   | TSS1500 |
| cg18827332 | 12 | 103,344,506 | 0.001932 | 0.206 | 0.229 |            |       |     |  |                |         |
| cg03852144 | 5  | 95,159,639  | 0.001919 | 0.206 | 0.175 | 0.0000967  | 0.066 |     |  | <i>GLRX</i>    | TSS1500 |
| cg07277549 | 7  | 30,509,141  | 0.002517 | 0.206 | 0.234 |            |       |     |  | <i>NOD1</i>    | 5'UTR   |
| cg02917321 | 22 | 38,215,204  | 0.036348 | 0.205 | 0.092 |            |       |     |  |                |         |
| cg14822490 | 10 | 124,909,889 | 2.34E-05 | 0.205 | 0.181 |            |       |     |  | <i>HMX2</i>    | 3'UTR   |
| cg15564098 | 7  | 27,281,346  | 1.37E-14 | 0.205 | 0.197 |            |       |     |  | <i>EVX1</i>    | TSS1500 |
| cg15612257 | 2  | 65,085,598  | 1.11E-16 | 0.205 | 0.202 |            |       |     |  |                |         |
| cg17102205 | 2  | 208,091,961 | 4.12E-10 | 0.205 | 0.180 |            |       |     |  |                |         |
| cg26606589 | 7  | 64,403,082  | 1.39E-06 | 0.205 | 0.143 |            |       |     |  |                |         |
| cg08939394 | 1  | 17,614,144  | 1.16E-08 | 0.205 | 0.192 |            |       |     |  |                |         |
| cg24621972 | 2  | 223,160,175 | 0.000605 | 0.205 | 0.207 |            |       |     |  | <i>PAX3</i>    | Body    |
| cg21184369 | 8  | 38,831,148  | 0.040912 | 0.205 | 0.100 |            |       |     |  | <i>HTRA4</i>   | TSS1500 |
| cg22863744 | 12 | 124,942,176 | 5.05E-05 | 0.205 | 0.195 |            |       | Yes |  | <i>NCOR2</i>   | Body    |
| cg17551891 | 7  | 1,960,795   | 8.25E-15 | 0.205 | 0.181 |            |       |     |  | <i>MAD1L1</i>  | Body    |
| cg19096825 | 13 | 112,711,941 | 0.010365 | 0.205 | 0.239 |            |       |     |  |                |         |

|            |    |             |          |       |       |  |  |  |                |         |
|------------|----|-------------|----------|-------|-------|--|--|--|----------------|---------|
| cg21244086 | 15 | 45,479,462  | 5.36E-17 | 0.205 | 0.198 |  |  |  | <i>SHF</i>     | Body    |
| cg02573472 | 5  | 76,940,356  | 6.86E-08 | 0.205 | 0.209 |  |  |  |                |         |
| cg10040116 | 17 | 13,332,667  | 1.78E-07 | 0.205 | 0.218 |  |  |  |                |         |
| cg10058920 | 20 | 1,974,738   | 0.012395 | 0.205 | 0.190 |  |  |  | <i>PDYN</i>    | TSS200  |
| cg16799111 | 8  | 10,589,359  | 9.89E-05 | 0.205 | 0.187 |  |  |  | <i>SOX7</i>    | TSS1500 |
| cg01039990 | X  | 136,510,831 | 0.018997 | 0.205 | 0.189 |  |  |  |                |         |
| cg05726661 | 17 | 7,348,438   | 2.12E-23 | 0.205 | 0.174 |  |  |  | <i>CHRNA1</i>  | 1stExon |
| cg09854734 | 16 | 66,613,273  | 2.66E-05 | 0.205 | 0.182 |  |  |  | <i>CMTM2</i>   | TSS200  |
| cg11637968 | 4  | 159,732,036 | 0.002628 | 0.205 | 0.150 |  |  |  | <i>FNIP2</i>   | Body    |
| cg00157359 | 11 | 66,233,183  | 0.000306 | 0.205 | 0.219 |  |  |  | <i>PELI3</i>   | TSS1500 |
| cg00678709 | 3  | 14,584,745  | 6.88E-09 | 0.205 | 0.199 |  |  |  | <i>GRIP2</i>   | TSS1500 |
| cg10690003 | 7  | 96,622,311  | 2.93E-08 | 0.205 | 0.199 |  |  |  | <i>DLX6AS</i>  | Body    |
| cg15392413 | 12 | 78,603,664  | 4.98E-05 | 0.205 | 0.191 |  |  |  | <i>NAV3</i>    | Body    |
| cg21929564 | 5  | 42,757,171  | 5.89E-09 | 0.205 | 0.204 |  |  |  | <i>CCDC152</i> | 5'UTR   |
| cg07466560 | 7  | 5,712,269   | 7.42E-14 | 0.205 | 0.204 |  |  |  | <i>RNF216</i>  | Body    |
| cg07944051 | 15 | 69,068,216  | 6.59E-10 | 0.205 | 0.196 |  |  |  |                |         |
| cg11095383 | 5  | 140,174,887 | 0.000688 | 0.205 | 0.194 |  |  |  | <i>PCDHA1</i>  | Body    |
| cg16064237 | 12 | 132,654,984 | 0.006541 | 0.205 | 0.200 |  |  |  |                |         |
| cg17356036 | 2  | 240,213,057 | 0.005423 | 0.205 | 0.233 |  |  |  | <i>HDAC4</i>   | Body    |
| cg21570493 | 1  | 16,157,388  | 1.23E-12 | 0.205 | 0.202 |  |  |  |                |         |
| cg03468671 | 14 | 39,737,849  | 4.77E-05 | 0.205 | 0.204 |  |  |  | <i>CTAGE5</i>  | Body    |
| cg03960066 | 1  | 150,255,503 | 0.011257 | 0.205 | 0.214 |  |  |  | <i>C1orf51</i> | 1stExon |
| cg11005692 | 4  | 1,595,294   | 3.67E-06 | 0.205 | 0.160 |  |  |  |                |         |
| cg18202521 | 1  | 19,600,702  | 1.1E-05  | 0.205 | 0.184 |  |  |  | <i>AKR7L</i>   | TSS200  |
| cg18639125 | 2  | 11,051,728  | 0.00041  | 0.205 | 0.103 |  |  |  | <i>KCNF1</i>   | TSS1500 |
| cg22516643 | 1  | 107,682,302 | 0.006448 | 0.205 | 0.218 |  |  |  | <i>NTNG1</i>   | TSS1500 |
| cg07250771 | 12 | 70,289,007  | 1.06E-19 | 0.205 | 0.203 |  |  |  |                |         |
| cg10861541 | 2  | 210,444,201 | 2.92E-06 | 0.205 | 0.219 |  |  |  | <i>MAP2</i>    | TSS1500 |
| cg13697735 | 14 | 65,172,103  | 1.82E-06 | 0.205 | 0.259 |  |  |  | <i>PLEKHG3</i> | 5'UTR   |
| cg24162603 | 3  | 127,945,858 | 1.2E-08  | 0.205 | 0.225 |  |  |  | <i>EEFSEC</i>  | Body    |
| cg26277026 | 12 | 22,486,029  | 4.17E-05 | 0.205 | 0.183 |  |  |  | <i>ST8SIA1</i> | Body    |
| cg27037937 | 15 | 93,876,630  | 4.58E-05 | 0.205 | 0.221 |  |  |  |                |         |
| cg20245757 | 17 | 46,663,759  | 0.045256 | 0.205 | 0.234 |  |  |  |                |         |
| cg10189962 | 2  | 175,192,878 | 5.34E-08 | 0.205 | 0.221 |  |  |  |                |         |

|            |    |             |          |       |       |          |       |  |                 |         |
|------------|----|-------------|----------|-------|-------|----------|-------|--|-----------------|---------|
| cg13528854 | 4  | 15,704,795  | 0.008001 | 0.205 | 0.221 |          |       |  | <i>BST1</i>     | 1stExon |
| cg16530881 | 17 | 38,708,399  | 1.05E-10 | 0.205 | 0.180 |          |       |  |                 |         |
| cg22531018 | 7  | 142,981,779 | 2.07E-07 | 0.205 | 0.141 |          |       |  | <i>TMEM139</i>  | TSS1500 |
| cg26094599 | 2  | 219,748,780 | 0.006709 | 0.205 | 0.168 |          |       |  | <i>WNT10A</i>   | Body    |
| cg02710534 | 5  | 141,225,619 | 7.79E-09 | 0.205 | 0.213 |          |       |  |                 |         |
| cg07044282 | 1  | 178,840,137 | 5.64E-10 | 0.205 | 0.208 |          |       |  | <i>ANGPTL1</i>  | 1stExon |
| cg09581226 | 5  | 140,857,474 | 1.31E-08 | 0.205 | 0.177 |          |       |  | <i>PCDHGA4</i>  | Body    |
| cg09884423 | 12 | 104,697,220 | 0.003509 | 0.205 | 0.128 |          |       |  | <i>TXNRD1</i>   | 5'UTR   |
| cg15174623 | 7  | 35,494,345  | 6.46E-07 | 0.205 | 0.197 |          |       |  |                 |         |
| cg26503653 | 5  | 169,064,024 | 0.009739 | 0.205 | 0.215 |          |       |  | <i>DOCK2</i>    | TSS1500 |
| cg26672959 | 3  | 65,387,308  | 1.97E-08 | 0.205 | 0.196 |          |       |  | <i>MAGI1</i>    | Body    |
| cg14375111 | 3  | 14,165,186  | 2.01E-08 | 0.205 | 0.164 |          |       |  | <i>TMEM43</i>   | TSS1500 |
| cg23745864 | 18 | 77,806,288  | 8.11E-22 | 0.205 | 0.202 |          |       |  | <i>C18orf22</i> | 3'UTR   |
| cg01891252 | 1  | 50,881,219  | 0.00063  | 0.205 | 0.194 |          |       |  |                 |         |
| cg02049629 | 6  | 28,662,065  | 0.003864 | 0.205 | 0.231 |          |       |  |                 |         |
| cg22653915 | 8  | 52,722,023  | 2.83E-08 | 0.205 | 0.172 |          |       |  | <i>PXDNL</i>    | TSS200  |
| cg24074477 | 22 | 17,956,455  | 1.47E-10 | 0.205 | 0.189 |          |       |  | <i>CECR2</i>    | TSS200  |
| cg27034935 | 5  | 153,873,021 | 0.007659 | 0.205 | 0.148 |          |       |  |                 |         |
| cg09643186 | 14 | 65,409,452  | 1.86E-05 | 0.205 | 0.185 | 4.89E-28 | 0.226 |  | <i>GPX2</i>     | 1stExon |
| cg18774195 | 3  | 170,303,830 | 0.006193 | 0.205 | 0.226 |          |       |  | <i>SLC7A14</i>  | 5'UTR   |
| cg01523763 | X  | 129,068,084 | 0.000294 | 0.205 | 0.258 |          |       |  |                 |         |
| cg08119553 | 15 | 93,616,966  | 3.36E-05 | 0.205 | 0.168 |          |       |  | <i>RGMA</i>     | 1stExon |
| cg19258062 | 7  | 152,133,423 | 0.013849 | 0.205 | 0.254 |          |       |  | <i>FABP5L3</i>  | TSS1500 |
| cg01505870 | 2  | 85,107,190  | 0.001708 | 0.205 | 0.229 |          |       |  | <i>C2orf89</i>  | Body    |
| cg04865290 | 3  | 52,927,548  | 8.28E-09 | 0.205 | 0.199 |          |       |  | <i>TMEM110</i>  | Body    |
| cg07048519 | 17 | 15,522,876  | 4.97E-10 | 0.205 | 0.211 |          |       |  | <i>CDRT1</i>    | 1stExon |
| cg08557649 | 15 | 76,639,713  | 0.012574 | 0.205 | 0.176 |          |       |  |                 |         |
| cg15409133 | 12 | 132,900,072 | 0.012876 | 0.205 | 0.248 |          |       |  | <i>GALNT9</i>   | Body    |
| cg24348495 | 20 | 62,693,971  | 1.87E-12 | 0.205 | 0.204 |          |       |  | <i>TCEA2</i>    | TSS200  |
| cg10782668 | 13 | 28,496,082  | 0.00724  | 0.205 | 0.243 |          |       |  | <i>PDX1</i>     | Body    |
| cg18817990 | 4  | 13,543,119  | 8.33E-06 | 0.205 | 0.191 |          |       |  | <i>NKX3-2</i>   | 3'UTR   |
| cg16430166 | 1  | 232,941,468 | 0.017969 | 0.205 | 0.178 |          |       |  | <i>KIAA1383</i> | 1stExon |
| cg24146331 | 10 | 102,590,225 | 0.00128  | 0.205 | 0.224 |          |       |  |                 |         |
| cg00317020 | 10 | 60,933,578  | 1.24E-05 | 0.205 | 0.150 |          |       |  |                 |         |

|            |    |             |          |       |       |          |       |     |                     |         |
|------------|----|-------------|----------|-------|-------|----------|-------|-----|---------------------|---------|
| cg03901660 | 1  | 221,050,459 | 8.76E-09 | 0.205 | 0.198 |          |       |     |                     |         |
| cg07787634 | 1  | 241,715,378 | 2.15E-11 | 0.205 | 0.182 |          |       |     | <i>KMO</i>          | Body    |
| cg18124852 | 17 | 43,506,540  | 3.92E-10 | 0.205 | 0.180 |          |       |     |                     |         |
| cg21886425 | 14 | 29,228,476  | 0.02578  | 0.205 | 0.291 |          |       |     |                     |         |
| cg22461324 | 7  | 155,252,944 | 0.031334 | 0.205 | 0.276 |          |       |     | <i>EN2</i>          | Body    |
| cg09582200 | 11 | 117,748,236 | 2.83E-05 | 0.205 | 0.179 |          |       |     | <i>FXVD6</i>        | TSS1500 |
| cg20954179 | 4  | 175,138,488 | 0.002775 | 0.205 | 0.237 |          |       |     |                     |         |
| cg24090911 | 5  | 400,732     | 1.91E-10 | 0.205 | 0.225 |          |       |     | <i>AHRR</i>         | Body    |
| cg02959637 | 11 | 64,513,289  | 0.020198 | 0.205 | 0.129 |          |       |     | <i>RASGRP2</i>      | TSS1500 |
| cg08087268 | 14 | 93,406,082  | 1.08E-06 | 0.205 | 0.199 |          |       |     | <i>ITPK1</i>        | 3'UTR   |
| cg02772106 | X  | 152,992,265 | 0.02288  | 0.205 | 0.244 |          |       |     | <i>ABCD1</i>        | Body    |
| cg01923252 | 6  | 108,436,849 | 0.01113  | 0.205 | 0.302 |          |       |     |                     |         |
| cg02768162 | 12 | 108,992,148 | 9.62E-05 | 0.205 | 0.248 |          |       |     | <i>TMEM119</i>      | TSS1500 |
| cg11572548 | 1  | 22,401,641  | 0.00192  | 0.205 | 0.197 |          |       |     | <i>CDC42</i>        | 5'UTR   |
| cg10950111 | 1  | 228,337,379 | 1.28E-07 | 0.205 | 0.229 |          |       |     | <i>GJC2</i>         | TSS200  |
| cg18989909 | 2  | 121,344,551 | 9.12E-09 | 0.205 | 0.211 |          |       |     |                     |         |
| cg21522159 | 4  | 7,252,415   | 0.019004 | 0.205 | 0.178 |          |       |     | <i>SORCS2</i>       | Body    |
| cg23402305 | 2  | 178,178,939 | 2.44E-05 | 0.205 | 0.214 |          |       |     | <i>LOC100130691</i> | Body    |
| cg15202102 | 11 | 6,341,867   | 0.024791 | 0.205 | 0.254 |          |       |     | <i>PRKCDBP</i>      | TSS200  |
| cg09036837 | 1  | 25,392,224  | 2.32E-08 | 0.205 | 0.197 |          |       |     |                     |         |
| cg12311936 | 2  | 144,994,885 | 3.41E-07 | 0.205 | 0.226 |          |       |     | <i>GTDC1</i>        | 5'UTR   |
| cg27606341 | 5  | 39,219,632  | 0.000561 | 0.205 | 0.163 | 8.21E-16 | 0.132 |     | <i>FYB</i>          | 1stExon |
| cg01861825 | 11 | 62,693,818  | 2.59E-05 | 0.205 | 0.185 |          |       |     |                     |         |
| cg07274253 | 5  | 10,330,984  | 2.59E-08 | 0.205 | 0.214 |          |       |     |                     |         |
| cg08679971 | 19 | 38,281,047  | 7.3E-08  | 0.205 | 0.180 |          |       |     |                     |         |
| cg17147317 | 1  | 207,669,324 | 1.44E-05 | 0.205 | 0.172 |          |       |     | <i>CR1</i>          | TSS200  |
| cg18146226 | 3  | 187,443,267 | 0.011047 | 0.205 | 0.146 |          |       | Yes | <i>BCL6</i>         | Body    |
| cg02179700 | 10 | 3,336,162   | 3.93E-07 | 0.205 | 0.195 |          |       |     |                     |         |
| cg16849609 | 2  | 119,916,662 | 0.049741 | 0.205 | 0.205 |          |       |     | <i>C1QL2</i>        | TSS200  |
| cg24296900 | 12 | 49,657,537  | 4.04E-15 | 0.205 | 0.213 |          |       |     | <i>TUBA1C</i>       | TSS1500 |
| cg00983948 | 6  | 158,937,485 | 5.56E-10 | 0.205 | 0.199 |          |       |     |                     |         |
| cg01270736 | 16 | 3,097,736   | 4.84E-05 | 0.205 | 0.206 |          |       |     | <i>MMP25</i>        | Body    |
| cg01529552 | 14 | 95,687,948  | 1.02E-12 | 0.205 | 0.204 |          |       |     | <i>CLMN</i>         | Body    |
| cg15600488 | 8  | 17,271,119  | 0.016824 | 0.205 | 0.198 |          |       |     | <i>MTMR7</i>        | TSS200  |

|            |    |             |          |       |       |          |       |  |                 |         |
|------------|----|-------------|----------|-------|-------|----------|-------|--|-----------------|---------|
| cg17753347 | 1  | 197,883,190 | 4.5E-07  | 0.205 | 0.199 |          |       |  | <i>LHX9</i>     | Body    |
| cg03292040 | 2  | 132,286,665 | 1.01E-08 | 0.205 | 0.209 |          |       |  | <i>CCDC74A</i>  | Body    |
| cg12966875 | 20 | 43,883,746  | 0.004537 | 0.205 | 0.170 | 1.63E-18 | 0.214 |  | <i>SLPI</i>     | TSS1500 |
| cg03562360 | 2  | 121,670,282 | 1.43E-23 | 0.205 | 0.185 |          |       |  | <i>GLI2</i>     | Body    |
| cg04488758 | 12 | 95,945,366  | 1.87E-11 | 0.205 | 0.180 | 5.43E-09 | 0.075 |  | <i>USP44</i>    | TSS200  |
| cg18228116 | 10 | 133,995,345 | 2.55E-07 | 0.205 | 0.192 |          |       |  | <i>JAKMIP3</i>  | 3'UTR   |
| cg20661138 | 8  | 145,925,314 | 0.046775 | 0.205 | 0.109 |          |       |  |                 |         |
| cg26174326 | 6  | 26,016,674  | 1.15E-11 | 0.205 | 0.202 |          |       |  |                 |         |
| cg27079118 | 7  | 128,809,298 | 0.000501 | 0.205 | 0.165 |          |       |  |                 |         |
| cg01244006 | 12 | 6,485,916   | 4.21E-05 | 0.205 | 0.193 |          |       |  | <i>SCNN1A</i>   | Body    |
| cg03536657 | 15 | 69,099,834  | 6.3E-12  | 0.205 | 0.195 |          |       |  | <i>C15orf28</i> | TSS1500 |
| cg04265797 | 14 | 38,679,952  | 5.72E-05 | 0.205 | 0.161 |          |       |  | <i>SSTR1</i>    | 3'UTR   |
| cg12444166 | 4  | 8,359,458   | 2.07E-05 | 0.205 | 0.207 |          |       |  |                 |         |
| cg21204588 | 15 | 50,316,779  | 3.69E-09 | 0.205 | 0.197 |          |       |  | <i>ATP8B4</i>   | Body    |
| cg21565937 | 2  | 709,250     | 2.98E-05 | 0.205 | 0.217 |          |       |  |                 |         |
| cg01626112 | 12 | 76,653,220  | 2.19E-07 | 0.205 | 0.238 |          |       |  |                 |         |
| cg10512769 | 1  | 211,675,356 | 1.24E-05 | 0.205 | 0.192 |          |       |  |                 |         |
| cg10705379 | 10 | 99,080,932  | 0.00035  | 0.205 | 0.161 |          |       |  | <i>FRAT1</i>    | 1stExon |
| cg12799029 | 17 | 984,184     | 2.11E-05 | 0.205 | 0.220 |          |       |  | <i>ABR</i>      | Body    |
| cg18221021 | 11 | 84,432,312  | 0.001178 | 0.205 | 0.310 |          |       |  | <i>DLG2</i>     | Body    |
| cg20948956 | 2  | 33,317,174  | 0.000618 | 0.205 | 0.261 |          |       |  | <i>LTBP1</i>    | Body    |
| cg13969239 | 6  | 106,439,962 | 0.043697 | 0.205 | 0.102 |          |       |  |                 |         |
| cg18208842 | 2  | 287,395     | 9.55E-06 | 0.205 | 0.208 |          |       |  | <i>FAM150B</i>  | Body    |
| cg09258553 | 2  | 241,564,827 | 0.000412 | 0.205 | 0.157 |          |       |  |                 |         |
| cg13177747 | 8  | 109,095,951 | 0.006741 | 0.205 | 0.193 |          |       |  | <i>RSPO2</i>    | TSS200  |
| cg10275315 | 15 | 83,954,246  | 3.04E-10 | 0.205 | 0.208 |          |       |  | <i>BNC1</i>     | TSS1500 |
| cg12751521 | 12 | 109,711,293 | 2.06E-12 | 0.205 | 0.216 |          |       |  |                 |         |
| cg21647257 | 19 | 36,523,945  | 6.81E-05 | 0.205 | 0.184 |          |       |  | <i>CLIP3</i>    | TSS200  |
| cg05526364 | 3  | 129,205,070 | 7.24E-11 | 0.205 | 0.204 |          |       |  | <i>IFT122</i>   | Body    |
| cg12901910 | 1  | 35,586,453  | 1.59E-07 | 0.205 | 0.217 |          |       |  |                 |         |
| cg24503003 | 12 | 110,682,837 | 9.88E-07 | 0.205 | 0.194 |          |       |  |                 |         |
| cg04036182 | 15 | 45,458,818  | 1.49E-11 | 0.205 | 0.189 |          |       |  |                 |         |
| cg10397082 | 2  | 1,609,832   | 1.97E-07 | 0.205 | 0.196 |          |       |  |                 |         |
| cg14411266 | 2  | 40,679,582  | 0.017719 | 0.205 | 0.099 |          |       |  | <i>SLC8A1</i>   | 5'UTR   |



|            |    |             |          |       |       |          |       |  |                  |         |
|------------|----|-------------|----------|-------|-------|----------|-------|--|------------------|---------|
| cg02927252 | 1  | 14,926,373  | 1.79E-06 | 0.205 | 0.208 |          |       |  | <i>KIAA1026</i>  | Body    |
| cg10729196 | 3  | 149,797,095 | 1.99E-09 | 0.205 | 0.208 |          |       |  |                  |         |
| cg14476852 | 8  | 8,506,370   | 8.41E-07 | 0.205 | 0.171 |          |       |  |                  |         |
| cg20433906 | 17 | 62,076,318  | 0.000173 | 0.205 | 0.226 |          |       |  | <i>C17orf72</i>  | Body    |
| cg21739754 | 2  | 185,462,847 | 0.001055 | 0.205 | 0.086 |          |       |  | <i>ZNF804A</i>   | TSS1500 |
| cg05686445 | 7  | 127,636,396 | 2.94E-14 | 0.205 | 0.207 |          |       |  | <i>C7orf54</i>   | TSS1500 |
| cg09015246 | 16 | 10,971,105  | 7.17E-06 | 0.205 | 0.219 |          |       |  | <i>CIITA</i>     | 1stExon |
| cg09492451 | 16 | 54,967,389  | 5.26E-05 | 0.205 | 0.243 |          |       |  | <i>IRX5</i>      | Body    |
| cg19889856 | 7  | 134,856,654 | 2.24E-07 | 0.205 | 0.218 |          |       |  | <i>C7orf49</i>   | TSS1500 |
| cg01173432 | 3  | 71,622,662  | 4.87E-08 | 0.205 | 0.185 |          |       |  | <i>FOXP1</i>     | 5'UTR   |
| cg02578942 | 3  | 174,558,606 | 2.86E-05 | 0.205 | 0.237 |          |       |  |                  |         |
| cg25596289 | 17 | 10,741,383  | 2.78E-09 | 0.205 | 0.222 |          |       |  | <i>PIRT</i>      | 1stExon |
| cg13581155 | 5  | 135,415,781 | 0.001531 | 0.205 | 0.152 |          |       |  |                  |         |
| cg18685455 | 6  | 135,796,690 | 1.21E-05 | 0.205 | 0.177 |          |       |  | <i>AHI1</i>      | Body    |
| cg19402876 | 3  | 71,119,415  | 7.18E-06 | 0.205 | 0.176 |          |       |  | <i>FOXP1</i>     | Body    |
| cg21544633 | 11 | 12,494,428  | 3.16E-08 | 0.205 | 0.185 |          |       |  | <i>PARVA</i>     | Body    |
| cg21859594 | 12 | 4,872,801   | 0.015545 | 0.205 | 0.244 |          |       |  | <i>GALNT8</i>    | Body    |
| cg04105250 | 2  | 171,679,114 | 2.08E-05 | 0.205 | 0.222 |          |       |  | <i>GAD1</i>      | Body    |
| cg09295799 | 6  | 5,994,235   | 0.009777 | 0.205 | 0.183 |          |       |  |                  |         |
| cg15261665 | 3  | 46,506,374  | 0.001438 | 0.205 | 0.166 | 1.57E-26 | 0.239 |  | <i>LTF</i>       | 5'UTR   |
| cg23424125 | 8  | 1,494,546   | 5.15E-05 | 0.205 | 0.158 |          |       |  | <i>DLGAP2</i>    | 5'UTR   |
| cg04983903 | 6  | 29,974,065  | 2.83E-09 | 0.205 | 0.177 |          |       |  | <i>HLA-J</i>     | Body    |
| cg19567594 | 11 | 10,715,175  | 3.55E-05 | 0.205 | 0.168 |          |       |  | <i>MRVI1</i>     | 1stExon |
| cg23082635 | 3  | 193,991,194 | 1.82E-07 | 0.205 | 0.202 |          |       |  |                  |         |
| cg04080517 | 1  | 120,905,322 | 1.49E-06 | 0.205 | 0.161 |          |       |  | <i>HIST2H2BA</i> | TSS1500 |
| cg20022223 | 17 | 80,260,410  | 1.46E-09 | 0.205 | 0.198 |          |       |  |                  |         |
| cg24884444 | 8  | 49,572,044  | 3.38E-05 | 0.205 | 0.219 |          |       |  |                  |         |
| cg00232402 | 18 | 77,385,290  | 2.55E-05 | 0.205 | 0.177 |          |       |  |                  |         |
| cg00336320 | 6  | 36,253,099  | 0.004205 | 0.205 | 0.183 |          |       |  | <i>PNPLA1</i>    | 5'UTR   |
| cg04144521 | 2  | 191,276,183 | 1.14E-12 | 0.205 | 0.189 |          |       |  | <i>MFSD6</i>     | 5'UTR   |
| cg06740950 | 3  | 171,878,318 | 7.5E-11  | 0.205 | 0.197 |          |       |  | <i>FNDC3B</i>    | Body    |
| cg08306303 | 11 | 119,567,761 | 3.21E-06 | 0.205 | 0.193 |          |       |  | <i>PVRL1</i>     | Body    |
| cg03833604 | 12 | 54,378,500  | 0.010919 | 0.205 | 0.162 |          |       |  | <i>HOXC10</i>    | TSS1500 |
| cg06741367 | 2  | 128,453,108 | 0.00913  | 0.205 | 0.173 |          |       |  |                  |         |

|            |    |             |          |       |       |          |       |  |                  |         |
|------------|----|-------------|----------|-------|-------|----------|-------|--|------------------|---------|
| cg20956815 | 3  | 184,320,006 | 3.3E-05  | 0.205 | 0.192 |          |       |  |                  |         |
| cg02235249 | 2  | 171,570,003 | 0.000544 | 0.205 | 0.157 |          |       |  | <i>LOC440925</i> | Body    |
| cg12744061 | 1  | 115,444,733 | 9.84E-08 | 0.205 | 0.168 |          |       |  | <i>SYCP1</i>     | Body    |
| cg17860090 | 1  | 209,605,104 | 1.43E-05 | 0.205 | 0.138 |          |       |  | <i>LOC642587</i> | Body    |
| cg11022926 | 7  | 43,652,643  | 6.48E-06 | 0.205 | 0.209 |          |       |  | <i>STK17A</i>    | Body    |
| cg14692377 | 17 | 28,562,685  | 0.001704 | 0.205 | 0.147 |          |       |  | <i>SLC6A4</i>    | 1stExon |
| cg05431842 | 4  | 30,724,915  | 5.78E-07 | 0.205 | 0.211 |          |       |  | <i>PCDH7</i>     | 1stExon |
| cg11707219 | 8  | 21,905,756  | 1.82E-08 | 0.205 | 0.169 |          |       |  | <i>FGF17</i>     | Body    |
| cg13871843 | 1  | 9,887,984   | 4.35E-13 | 0.205 | 0.183 |          |       |  |                  |         |
| cg20161179 | 4  | 4,863,282   | 0.000396 | 0.205 | 0.211 | 2.57E-17 | 0.198 |  | <i>MSX1</i>      | Body    |
| cg26333564 | 14 | 105,147,781 | 0.000208 | 0.205 | 0.181 |          |       |  |                  |         |
| cg04738888 | 17 | 73,584,111  | 1.82E-06 | 0.205 | 0.201 |          |       |  | <i>MYO15B</i>    | TSS200  |
| cg16142313 | 8  | 28,950,249  | 2.18E-12 | 0.205 | 0.183 |          |       |  | <i>KIF13B</i>    | Body    |
| cg19555331 | 4  | 147,561,900 | 0.035185 | 0.205 | 0.248 |          |       |  | <i>POU4F2</i>    | Body    |
| cg20073553 | 4  | 13,545,291  | 9.23E-05 | 0.205 | 0.209 | 1.91E-09 | 0.133 |  | <i>NKX3-2</i>    | Body    |
| cg22787186 | 11 | 324,634     | 2.79E-16 | 0.205 | 0.188 |          |       |  |                  |         |
| cg09437162 | 9  | 138,555,074 | 0.007302 | 0.205 | 0.161 |          |       |  | <i>LCN9</i>      | TSS200  |
| cg10092957 | 19 | 39,687,079  | 0.002973 | 0.205 | 0.291 | 1.73E-13 | 0.095 |  | <i>NCCRP1</i>    | TSS1500 |
| cg17375248 | 2  | 66,811,157  | 0.011175 | 0.205 | 0.203 |          |       |  |                  |         |
| cg19273694 | 2  | 24,233,923  | 1.98E-11 | 0.205 | 0.208 |          |       |  | <i>MFSD2B</i>    | Body    |
| cg20138067 | 1  | 203,273,571 | 5.52E-10 | 0.205 | 0.180 |          |       |  | <i>BTG2</i>      | TSS1500 |
| cg22008026 | 4  | 155,413,392 | 0.000212 | 0.205 | 0.216 |          |       |  | <i>DCHS2</i>     | TSS1500 |
| cg02923485 | 1  | 223,959,609 | 9.66E-05 | 0.205 | 0.195 |          |       |  | <i>CAPN2</i>     | Body    |
| cg18117669 | 15 | 57,510,284  | 5.78E-08 | 0.205 | 0.190 |          |       |  | <i>TCF12</i>     | TSS1500 |
| cg06570224 | 3  | 157,812,475 | 4.55E-05 | 0.205 | 0.177 |          |       |  |                  |         |
| cg14706428 | 4  | 6,113,389   | 0.00312  | 0.205 | 0.211 |          |       |  | <i>JAKMIP1</i>   | Body    |
| cg00188032 | 5  | 96,141,721  | 1.16E-05 | 0.205 | 0.196 |          |       |  | <i>ERAP1</i>     | 5'UTR   |
| cg10953225 | 1  | 149,326,531 | 0.000249 | 0.205 | 0.227 |          |       |  |                  |         |
| cg13458005 | 10 | 27,702,309  | 3.99E-05 | 0.205 | 0.224 |          |       |  | <i>PTCHD3</i>    | 1stExon |
| cg13529733 | 2  | 1,609,194   | 8.85E-06 | 0.205 | 0.207 |          |       |  |                  |         |
| cg13757081 | 7  | 26,480,747  | 0.000374 | 0.205 | 0.145 |          |       |  | <i>LOC441204</i> | Body    |
| cg18530324 | 18 | 46,064,992  | 0.001124 | 0.205 | 0.067 | 1.4E-23  | 0.201 |  | <i>KIAA0427</i>  | TSS1500 |
| cg21756647 | 11 | 75,024,611  | 5.26E-08 | 0.205 | 0.211 |          |       |  | <i>ARRB1</i>     | Body    |
| cg11996817 | 17 | 8,230,768   | 6.24E-06 | 0.205 | 0.180 |          |       |  |                  |         |

|            |    |             |          |       |       |          |       |     |                  |         |
|------------|----|-------------|----------|-------|-------|----------|-------|-----|------------------|---------|
| cg13994241 | 17 | 46,667,725  | 4.76E-12 | 0.205 | 0.190 |          |       |     | <i>LOC404266</i> | TSS200  |
| cg21440587 | 6  | 31,583,458  | 0.000108 | 0.205 | 0.234 | 1.86E-16 | 0.080 |     | <i>AIF1</i>      | TSS1500 |
| cg23781334 | 4  | 1,772,062   | 1.34E-23 | 0.205 | 0.200 |          |       |     |                  |         |
| cg25310081 | 12 | 56,959,642  | 0.000432 | 0.205 | 0.179 |          |       |     | <i>RBMS2</i>     | Body    |
| cg00277591 | 17 | 4,079,652   | 1.71E-08 | 0.205 | 0.186 |          |       |     | <i>ANKFY1</i>    | Body    |
| cg02455706 | 16 | 84,918,851  | 0.000129 | 0.205 | 0.190 |          |       |     | <i>CRISPLD2</i>  | Body    |
| cg08288561 | 16 | 66,462,307  | 3.33E-05 | 0.205 | 0.187 |          |       |     | <i>BEAN</i>      | 5'UTR   |
| cg10090792 | 1  | 38,198,142  | 1.86E-10 | 0.205 | 0.205 |          |       |     | <i>EPHA10</i>    | Body    |
| cg14066905 | 11 | 124,953,090 | 2.13E-08 | 0.205 | 0.200 |          |       |     | <i>SLC37A2</i>   | Body    |
| cg25345178 | 8  | 72,459,908  | 0.018264 | 0.205 | 0.245 |          |       |     |                  |         |
| cg03327325 | 10 | 43,846,574  | 0.048025 | 0.205 | 0.129 |          |       | Yes |                  |         |
| cg09900242 | 16 | 68,676,451  | 7.99E-08 | 0.205 | 0.188 |          |       |     |                  |         |
| cg14973892 | 13 | 46,944,143  | 9.19E-05 | 0.205 | 0.212 |          |       |     | <i>C13orf18</i>  | Body    |
| cg22366375 | 4  | 25,033,140  | 0.002085 | 0.205 | 0.173 |          |       |     | <i>LGI2</i>      | TSS1500 |
| cg19319393 | 1  | 6,321,737   | 0.00542  | 0.205 | 0.144 |          |       |     | <i>GPR153</i>    | TSS1500 |
| cg23337631 | 12 | 52,994,933  | 3.17E-09 | 0.205 | 0.221 |          |       |     | <i>KRT72</i>     | 1stExon |
| cg00124009 | 1  | 201,439,578 | 2.37E-23 | 0.205 | 0.197 |          |       |     | <i>PHLDA3</i>    | TSS1500 |
| cg12110437 | 8  | 144,098,888 | 0.00023  | 0.205 | 0.208 |          |       |     | <i>LY6E</i>      | TSS1500 |
| cg20068535 | 6  | 151,560,981 | 2.2E-06  | 0.205 | 0.204 |          |       |     | <i>AKAP12</i>    | TSS200  |
| cg04171065 | 14 | 42,075,760  | 0.018606 | 0.205 | 0.286 |          |       |     | <i>LRFN5</i>     | TSS1500 |
| cg20517697 | 14 | 74,208,225  | 0.000206 | 0.205 | 0.189 |          |       |     | <i>C14orf43</i>  | 5'UTR   |
| cg16502826 | 1  | 970,237     | 4E-09    | 0.205 | 0.193 |          |       |     | <i>AGRN</i>      | Body    |
| cg22219379 | 3  | 140,541,355 | 0.000122 | 0.205 | 0.189 |          |       |     |                  |         |
| cg24946736 | 19 | 7,542,181   | 8.68E-21 | 0.205 | 0.200 |          |       |     | <i>PEX11G</i>    | Body    |
| cg01583753 | 2  | 39,470,725  | 0.044901 | 0.205 | 0.089 |          |       |     |                  |         |
| cg06982745 | 10 | 72,454,006  | 0.00827  | 0.205 | 0.133 |          |       |     | <i>ADAMTS14</i>  | Body    |
| cg15299388 | 4  | 48,491,941  | 0.000427 | 0.205 | 0.184 |          |       |     | <i>ZAR1</i>      | TSS1500 |
| cg16555909 | 1  | 23,721,285  | 0.00278  | 0.205 | 0.230 |          |       |     | <i>TCEA3</i>     | Body    |
| cg07243366 | 12 | 19,729,703  | 1.09E-08 | 0.205 | 0.221 |          |       |     |                  |         |
| cg13780614 | 15 | 49,607,868  | 8.27E-14 | 0.205 | 0.207 |          |       |     | <i>GALK2</i>     | Body    |
| cg13059719 | 1  | 179,712,027 | 0.022737 | 0.205 | 0.175 |          |       |     | <i>FAM163A</i>   | TSS1500 |
| cg15498274 | 19 | 47,742,558  | 1.39E-19 | 0.205 | 0.173 |          |       |     |                  |         |
| cg19107504 | 10 | 88,467,518  | 3.81E-05 | 0.205 | 0.224 |          |       |     | <i>LDB3</i>      | Body    |
| cg09762021 | 1  | 153,762,224 | 0.002154 | 0.205 | 0.172 |          |       |     |                  |         |

|            |    |             |          |       |       |           |       |  |                 |         |
|------------|----|-------------|----------|-------|-------|-----------|-------|--|-----------------|---------|
| cg21092790 | 8  | 117,950,244 | 0.009941 | 0.205 | 0.197 |           |       |  | <i>C8orf85</i>  | TSS1500 |
| cg25465406 | 17 | 7,906,098   | 0.039796 | 0.205 | 0.221 | 4.17E-13  | 0.161 |  | <i>GUCY2D</i>   | 5'UTR   |
| cg00625783 | 17 | 43,222,106  | 0.025432 | 0.205 | 0.122 |           |       |  |                 |         |
| cg05740045 | 8  | 65,499,926  | 0.000195 | 0.205 | 0.173 |           |       |  |                 |         |
| cg17149655 | 15 | 61,521,910  | 0.001993 | 0.205 | 0.179 |           |       |  | <i>RORA</i>     | TSS1500 |
| cg05300248 | 18 | 24,537,063  | 3.36E-06 | 0.205 | 0.181 |           |       |  | <i>CHST9</i>    | Body    |
| cg14652095 | 6  | 26,018,185  | 5.85E-05 | 0.205 | 0.173 | 3.13E-21  | 0.249 |  | <i>HIST1H1A</i> | TSS200  |
| cg17696160 | 14 | 37,136,192  | 0.008184 | 0.205 | 0.127 |           |       |  | <i>PAX9</i>     | Body    |
| cg05643188 | 1  | 197,873,430 | 4.14E-06 | 0.204 | 0.200 |           |       |  | <i>C1orf53</i>  | Body    |
| cg07739851 | 17 | 72,231,448  | 0.002613 | 0.204 | 0.212 |           |       |  | <i>TTYH2</i>    | Body    |
| cg23177714 | 8  | 142,877,740 | 3.64E-06 | 0.204 | 0.212 |           |       |  |                 |         |
| cg02122367 | 5  | 1,841,622   | 0.000587 | 0.204 | 0.129 |           |       |  |                 |         |
| cg03958979 | 6  | 108,486,387 | 2.27E-07 | 0.204 | 0.188 | 3.39E-17  | 0.205 |  | <i>NR2E1</i>    | TSS1500 |
| cg20169062 | 5  | 53,751,411  | 5.56E-09 | 0.204 | 0.194 | 0.0000412 | 0.099 |  | <i>HSPB3</i>    | TSS200  |
| cg20735282 | 11 | 69,481,734  | 2.61E-06 | 0.204 | 0.179 |           |       |  | <i>ORAOV1</i>   | 3'UTR   |
| cg26278454 | 20 | 982,623     | 0.000467 | 0.204 | 0.175 |           |       |  | <i>RSPO4</i>    | Body    |
| cg00093099 | 18 | 2,849,071   | 0.001243 | 0.204 | 0.221 |           |       |  | <i>EMILIN2</i>  | Body    |
| cg15641024 | 11 | 57,232,331  | 1.42E-06 | 0.204 | 0.240 |           |       |  | <i>RTN4RL2</i>  | Body    |
| cg07249684 | 8  | 689,392     | 0.021089 | 0.204 | 0.249 |           |       |  |                 |         |
| cg14768245 | 11 | 14,926,780  | 0.012094 | 0.204 | 0.235 |           |       |  |                 |         |
| cg19962424 | 11 | 35,110,045  | 0.00886  | 0.204 | 0.268 |           |       |  |                 |         |
| cg03733207 | 20 | 36,932,553  | 6.22E-05 | 0.204 | 0.189 |           |       |  | <i>BPI</i>      | 1stExon |
| cg08133931 | 17 | 48,636,626  | 2.89E-05 | 0.204 | 0.217 |           |       |  |                 |         |
| cg13058457 | 15 | 38,422,160  | 0.003547 | 0.204 | 0.160 |           |       |  |                 |         |
| cg24379332 | 19 | 10,627,706  | 0.000645 | 0.204 | 0.227 |           |       |  | <i>S1PR5</i>    | 5'UTR   |
| cg06465011 | 16 | 84,860,871  | 9.17E-07 | 0.204 | 0.189 |           |       |  | <i>CRISPLD2</i> | 5'UTR   |
| cg23180841 | 2  | 28,897,312  | 0.001582 | 0.204 | 0.211 |           |       |  |                 |         |
| cg20559633 | 8  | 142,734,242 | 1.91E-05 | 0.204 | 0.161 |           |       |  |                 |         |
| cg01325935 | X  | 67,905,522  | 1.18E-11 | 0.204 | 0.187 |           |       |  | <i>STARD8</i>   | 5'UTR   |
| cg13130319 | 14 | 77,964,542  | 1.89E-05 | 0.204 | 0.198 |           |       |  | <i>ISM2</i>     | Body    |
| cg13928759 | 10 | 95,517,382  | 3.73E-08 | 0.204 | 0.203 |           |       |  | <i>LGI1</i>     | TSS200  |
| cg18074297 | 21 | 36,041,612  | 0.000349 | 0.204 | 0.191 |           |       |  | <i>CLIC6</i>    | TSS200  |
| cg22459630 | 15 | 68,121,028  | 0.020474 | 0.204 | 0.241 |           |       |  | <i>LBXCOR1</i>  | Body    |
| cg09975397 | 11 | 74,384,522  | 4.22E-10 | 0.204 | 0.201 |           |       |  |                 |         |

|            |    |             |          |       |       |            |       |  |                  |         |
|------------|----|-------------|----------|-------|-------|------------|-------|--|------------------|---------|
| cg22489957 | 6  | 28,921,805  | 0.042966 | 0.204 | 0.142 |            |       |  |                  |         |
| cg21380341 | 12 | 94,543,978  | 0.03494  | 0.204 | 0.204 |            |       |  | <i>PLXNC1</i>    | Body    |
| cg00463746 | 1  | 64,434,320  | 0.007605 | 0.204 | 0.200 |            |       |  | <i>ROR1</i>      | Body    |
| cg17549878 | 17 | 18,280,849  | 1.82E-07 | 0.204 | 0.174 |            |       |  | <i>EVPLL</i>     | TSS1500 |
| cg20991420 | 2  | 173,061,715 | 8.92E-06 | 0.204 | 0.148 |            |       |  |                  |         |
| cg09556952 | 21 | 38,119,946  | 0.012658 | 0.204 | 0.191 |            |       |  | <i>SIM2</i>      | Body    |
| cg16362949 | 17 | 1,390,671   | 0.00047  | 0.204 | 0.105 |            |       |  | <i>MYO1C</i>     | 5'UTR   |
| cg24910943 | 10 | 11,206,320  | 0.000629 | 0.204 | 0.210 |            |       |  | <i>CUGBP2</i>    | Body    |
| cg04655481 | 9  | 125,796,809 | 3.73E-18 | 0.204 | 0.195 | 2.27E-18   | 0.141 |  | <i>GPR21</i>     | TSS200  |
| cg10853431 | 10 | 11,574,300  | 0.000102 | 0.204 | 0.212 |            |       |  | <i>USP6NL</i>    | Body    |
| cg14534144 | 13 | 114,150,007 | 6.95E-07 | 0.204 | 0.199 |            |       |  | <i>TMCO3</i>     | Body    |
| cg17783086 | 17 | 62,775,188  | 0.003807 | 0.204 | 0.112 |            |       |  | <i>LOC146880</i> | Body    |
| cg04076774 | 12 | 107,954,581 | 4.74E-07 | 0.204 | 0.196 |            |       |  | <i>BTBD11</i>    | Body    |
| cg07116163 | 2  | 170,589,499 | 1.13E-05 | 0.204 | 0.193 |            |       |  | <i>KLHL23</i>    | 5'UTR   |
| cg11337388 | 1  | 44,446,092  | 2.84E-09 | 0.204 | 0.204 |            |       |  | <i>B4GALT2</i>   | 5'UTR   |
| cg25772221 | 1  | 1,079,622   | 6.34E-08 | 0.204 | 0.155 |            |       |  |                  |         |
| cg26266099 | 1  | 33,391,638  | 2.98E-05 | 0.204 | 0.198 |            |       |  |                  |         |
| cg00721947 | 8  | 143,755,447 | 1.85E-09 | 0.204 | 0.193 |            |       |  |                  |         |
| cg01883046 | 2  | 174,890,420 | 1.25E-09 | 0.204 | 0.180 |            |       |  |                  |         |
| cg03769939 | 1  | 25,254,129  | 1.2E-10  | 0.204 | 0.198 |            |       |  | <i>RUNX3</i>     | Body    |
| cg11762968 | 13 | 95,354,190  | 1.04E-05 | 0.204 | 0.180 |            |       |  |                  |         |
| cg13629753 | 1  | 89,591,719  | 0.009351 | 0.204 | 0.326 | 0.00000377 | 0.090 |  | <i>GBP2</i>      | 1stExon |
| cg12579212 | 3  | 46,448,868  | 3.29E-06 | 0.204 | 0.196 |            |       |  | <i>CCRL2</i>     | 5'UTR   |
| cg20892260 | 8  | 23,564,025  | 0.00015  | 0.204 | 0.189 |            |       |  | <i>NKX2-6</i>    | TSS200  |
| cg09948958 | 14 | 94,443,055  | 0.010434 | 0.204 | 0.230 |            |       |  |                  |         |
| cg12068124 | 19 | 1,238,538   | 8.41E-07 | 0.204 | 0.243 |            |       |  | <i>C19orf26</i>  | TSS1500 |
| cg21794767 | 7  | 120,657,213 | 5.81E-08 | 0.204 | 0.214 |            |       |  | <i>C7orf58</i>   | Body    |
| cg08247587 | 14 | 38,091,400  | 0.000126 | 0.204 | 0.199 |            |       |  |                  |         |
| cg13983182 | 9  | 130,853,333 | 9.94E-15 | 0.204 | 0.192 |            |       |  | <i>SLC25A25</i>  | Body    |
| cg14334014 | 17 | 64,226,953  | 3.06E-13 | 0.204 | 0.210 |            |       |  | <i>APOH</i>      | TSS1500 |
| cg11018723 | 1  | 25,256,939  | 0.033992 | 0.204 | 0.238 |            |       |  | <i>RUNX3</i>     | Body    |
| cg09566302 | 16 | 30,964,627  | 7.12E-10 | 0.204 | 0.217 |            |       |  | <i>ORAI3</i>     | Body    |
| cg12530864 | 4  | 188,953,092 | 0.006242 | 0.204 | 0.208 |            |       |  |                  |         |
| cg12680205 | 10 | 80,303,482  | 6.61E-06 | 0.204 | 0.165 |            |       |  |                  |         |

|            |    |             |          |       |       |            |       |  |                  |         |
|------------|----|-------------|----------|-------|-------|------------|-------|--|------------------|---------|
| cg19567891 | 15 | 89,921,083  | 8.59E-07 | 0.204 | 0.173 |            |       |  | <i>LOC254559</i> | TSS200  |
| cg25988321 | 14 | 95,238,750  | 0.000554 | 0.204 | 0.203 |            |       |  |                  |         |
| cg06215457 | 13 | 46,190,028  | 0.001477 | 0.204 | 0.231 |            |       |  | <i>FAM194B</i>   | TSS200  |
| cg19893473 | 3  | 177,778,301 | 1.25E-09 | 0.204 | 0.206 |            |       |  |                  |         |
| cg14266251 | 9  | 135,462,291 | 0.032498 | 0.204 | 0.198 |            |       |  | <i>BARHL1</i>    | Body    |
| cg06520300 | 2  | 16,081,824  | 0.001924 | 0.204 | 0.145 |            |       |  | <i>MYCN</i>      | 5'UTR   |
| cg06783423 | 3  | 42,538,831  | 6.69E-06 | 0.204 | 0.206 |            |       |  |                  |         |
| cg21097788 | 14 | 93,502,930  | 4.27E-10 | 0.204 | 0.195 |            |       |  | <i>ITPK1</i>     | Body    |
| cg02642822 | 17 | 46,666,926  | 0.003227 | 0.204 | 0.191 |            |       |  | <i>LOC404266</i> | TSS1500 |
| cg03466525 | 10 | 50,650,021  | 5.98E-08 | 0.204 | 0.181 |            |       |  |                  |         |
| cg08457898 | 19 | 15,343,786  | 0.002922 | 0.204 | 0.221 |            |       |  | <i>EPHX3</i>     | 5'UTR   |
| cg11810743 | 6  | 168,714,693 | 2.86E-06 | 0.204 | 0.170 |            |       |  | <i>DACT2</i>     | Body    |
| cg23998478 | 2  | 121,269,292 | 6.33E-06 | 0.204 | 0.199 |            |       |  |                  |         |
| cg24335116 | 12 | 123,469,507 | 3.89E-06 | 0.204 | 0.248 |            |       |  | <i>PITPNM2</i>   | 3'UTR   |
| cg24834659 | 19 | 22,805,803  | 0.031825 | 0.204 | 0.225 |            |       |  |                  |         |
| cg24574963 | 7  | 149,120,622 | 1.57E-15 | 0.204 | 0.197 |            |       |  |                  |         |
| cg06842071 | 2  | 233,499,460 | 2.3E-05  | 0.204 | 0.184 |            |       |  | <i>EFHD1</i>     | Body    |
| cg14883961 | 8  | 127,846,077 | 1.49E-06 | 0.204 | 0.184 |            |       |  |                  |         |
| cg00214171 | 17 | 73,642,991  | 4.07E-09 | 0.204 | 0.200 |            |       |  | <i>RECQL5</i>    | Body    |
| cg03463523 | 16 | 73,099,917  | 0.000301 | 0.204 | 0.197 |            |       |  |                  |         |
| cg07770222 | 8  | 144,120,106 | 0.015197 | 0.204 | 0.119 | 0.00993538 | 0.041 |  | <i>C8orf31</i>   | TSS1500 |
| cg08388455 | 17 | 37,081,875  | 7.33E-09 | 0.204 | 0.194 |            |       |  |                  |         |
| cg26262576 | 13 | 20,420,028  | 2.32E-05 | 0.204 | 0.229 |            |       |  | <i>ZMYM5</i>     | Body    |
| cg15338967 | 13 | 49,175,326  | 5.61E-06 | 0.204 | 0.234 |            |       |  |                  |         |
| cg17007374 | 15 | 71,417,947  | 2.01E-09 | 0.204 | 0.210 |            |       |  |                  |         |
| cg17926940 | 14 | 97,685,060  | 0.036194 | 0.204 | 0.273 |            |       |  |                  |         |
| cg23473955 | 17 | 27,893,407  | 2.01E-09 | 0.204 | 0.189 |            |       |  | <i>ABHD15</i>    | 1stExon |
| cg24156261 | 3  | 99,721,850  | 2.29E-19 | 0.204 | 0.193 |            |       |  | <i>C3orf26</i>   | Body    |
| cg08777316 | 5  | 158,531,511 | 0.002488 | 0.204 | 0.181 |            |       |  |                  |         |
| cg10576245 | 1  | 233,249,267 | 0.000311 | 0.204 | 0.200 |            |       |  | <i>PCNXL2</i>    | Body    |
| cg17480077 | 1  | 10,895,517  | 3.05E-09 | 0.204 | 0.188 |            |       |  |                  |         |
| cg25010500 | 5  | 140,619,586 | 0.001613 | 0.204 | 0.263 |            |       |  | <i>PCDHB19P</i>  | TSS200  |
| cg26064794 | 1  | 204,435,434 | 2.1E-19  | 0.204 | 0.199 |            |       |  | <i>PIK3C2B</i>   | Body    |
| cg05239811 | 6  | 31,734,147  | 6.72E-05 | 0.204 | 0.212 |            |       |  | <i>C6orf27</i>   | Body    |

|            |    |             |          |       |       |  |  |  |                  |        |
|------------|----|-------------|----------|-------|-------|--|--|--|------------------|--------|
| cg08224569 | 8  | 142,369,705 | 7.93E-11 | 0.204 | 0.190 |  |  |  | <i>GPR20</i>     | 5'UTR  |
| cg24940576 | 11 | 125,904,314 | 7.43E-06 | 0.204 | 0.232 |  |  |  | <i>CDON</i>      | 5'UTR  |
| cg04650789 | 15 | 96,864,196  | 2.66E-06 | 0.204 | 0.214 |  |  |  |                  |        |
| cg18290981 | 11 | 63,789,520  | 3.64E-14 | 0.204 | 0.188 |  |  |  | <i>MACROD1</i>   | Body   |
| cg04734712 | 17 | 1,811,474   | 0.001084 | 0.204 | 0.150 |  |  |  |                  |        |
| cg26251325 | 5  | 54,518,745  | 0.021909 | 0.204 | 0.191 |  |  |  |                  |        |
| cg03828874 | 5  | 3,605,954   | 0.001637 | 0.204 | 0.267 |  |  |  |                  |        |
| cg24937877 | 1  | 11,444,066  | 0.000414 | 0.204 | 0.213 |  |  |  |                  |        |
| cg27241845 | 2  | 233,250,370 | 0.001937 | 0.204 | 0.173 |  |  |  |                  |        |
| cg06587257 | 12 | 50,452,135  | 2.38E-05 | 0.204 | 0.176 |  |  |  | <i>ACCN2</i>     | 5'UTR  |
| cg16468389 | 17 | 46,831,742  | 1.61E-07 | 0.204 | 0.198 |  |  |  |                  |        |
| cg25560775 | 15 | 65,707,468  | 1.67E-05 | 0.204 | 0.198 |  |  |  | <i>IGDCC4</i>    | Body   |
| cg26393630 | 14 | 30,399,576  | 0.007199 | 0.204 | 0.208 |  |  |  |                  |        |
| cg00517787 | 4  | 154,713,235 | 0.001694 | 0.204 | 0.209 |  |  |  |                  |        |
| cg09430957 | 19 | 51,419,804  | 5.02E-10 | 0.204 | 0.192 |  |  |  |                  |        |
| cg05655534 | 2  | 62,798,448  | 0.004735 | 0.204 | 0.222 |  |  |  |                  |        |
| cg08288016 | 4  | 187,590,536 | 8.08E-09 | 0.204 | 0.191 |  |  |  | <i>FAT1</i>      | Body   |
| cg01300684 | 4  | 141,230,118 | 2.78E-11 | 0.204 | 0.197 |  |  |  | <i>SCOC</i>      | 5'UTR  |
| cg09146183 | 22 | 38,610,376  | 5.27E-05 | 0.204 | 0.204 |  |  |  | <i>MAFF</i>      | Body   |
| cg14880184 | 18 | 19,758,221  | 1.31E-17 | 0.204 | 0.197 |  |  |  | <i>GATA6</i>     | Body   |
| cg19584871 | 2  | 11,810,508  | 0.001305 | 0.204 | 0.206 |  |  |  | <i>NTSR2</i>     | TSS200 |
| cg05138949 | 3  | 57,195,542  | 0.002366 | 0.204 | 0.225 |  |  |  | <i>IL17RD</i>    | Body   |
| cg20381115 | 15 | 45,671,148  | 7.45E-05 | 0.204 | 0.201 |  |  |  | <i>LOC145663</i> | Body   |
| cg27517681 | 1  | 119,528,848 | 0.033147 | 0.204 | 0.201 |  |  |  | <i>TBX15</i>     | 5'UTR  |
| cg13827582 | 15 | 99,971,213  | 2.44E-06 | 0.204 | 0.182 |  |  |  |                  |        |
| cg22600043 | 8  | 109,095,991 | 0.001039 | 0.204 | 0.237 |  |  |  | <i>RSPO2</i>     | TSS200 |
| cg07103201 | 17 | 20,171,047  | 7.59E-07 | 0.204 | 0.199 |  |  |  | <i>CYTSB</i>     | Body   |
| cg17518215 | 2  | 172,973,241 | 5.04E-06 | 0.204 | 0.178 |  |  |  |                  |        |
| cg07013148 | 8  | 146,233,339 | 6.55E-17 | 0.204 | 0.204 |  |  |  |                  |        |
| cg08823954 | 11 | 73,359,662  | 1.36E-05 | 0.204 | 0.168 |  |  |  | <i>PLEKHB1</i>   | 5'UTR  |
| cg14848289 | 11 | 117,732,291 | 0.001831 | 0.204 | 0.179 |  |  |  | <i>FXVD6</i>     | 5'UTR  |
| cg15880760 | 17 | 48,546,290  | 0.000253 | 0.204 | 0.174 |  |  |  | <i>CHAD</i>      | TSS200 |
| cg03434509 | 8  | 82,543,424  | 1.69E-06 | 0.204 | 0.197 |  |  |  |                  |        |
| cg03847705 | 10 | 115,860,959 | 0.045174 | 0.204 | 0.008 |  |  |  |                  |        |

|            |    |             |          |       |       |          |       |  |                 |         |
|------------|----|-------------|----------|-------|-------|----------|-------|--|-----------------|---------|
| cg00696323 | 3  | 124,520,019 | 2.51E-11 | 0.204 | 0.187 |          |       |  | <i>ITGB5</i>    | Body    |
| cg06962787 | 17 | 15,522,897  | 2.48E-12 | 0.204 | 0.205 |          |       |  | <i>CDRT1</i>    | 1stExon |
| cg09078293 | 16 | 17,510,730  | 3.12E-07 | 0.204 | 0.187 |          |       |  | <i>XYLT1</i>    | Body    |
| cg17843665 | 13 | 24,351,673  | 0.000191 | 0.204 | 0.226 |          |       |  | <i>MIPEP</i>    | Body    |
| cg20341836 | 6  | 29,894,228  | 0.003552 | 0.204 | 0.163 |          |       |  | <i>HCG4P6</i>   | TSS1500 |
| cg02659920 | 11 | 726,335     | 0.009782 | 0.204 | 0.134 |          |       |  | <i>EPS8L2</i>   | Body    |
| cg02990302 | 16 | 58,155,189  | 0.000558 | 0.204 | 0.222 |          |       |  | <i>C16orf80</i> | Body    |
| cg21578330 | 4  | 87,829,966  | 1.64E-07 | 0.204 | 0.190 |          |       |  |                 |         |
| cg12210914 | 1  | 228,075,694 | 0.000105 | 0.204 | 0.201 |          |       |  |                 |         |
| cg13976134 | 4  | 77,733,007  | 3.25E-05 | 0.204 | 0.221 |          |       |  |                 |         |
| cg15709989 | 3  | 185,912,227 | 0.000106 | 0.204 | 0.163 |          |       |  | <i>DGKG</i>     | Body    |
| cg15895121 | 5  | 141,625,843 | 0.002878 | 0.204 | 0.240 |          |       |  |                 |         |
| cg25799109 | 3  | 57,102,900  | 0.00094  | 0.204 | 0.166 |          |       |  | <i>ARHGEF3</i>  | 5'UTR   |
| cg11346237 | 7  | 130,019,736 | 7.17E-09 | 0.204 | 0.201 |          |       |  | <i>CPA1</i>     | TSS1500 |
| cg02286761 | 19 | 14,315,694  | 1.08E-16 | 0.204 | 0.212 |          |       |  | <i>LPHN1</i>    | 5'UTR   |
| cg10854092 | 10 | 133,985,931 | 0.000979 | 0.204 | 0.209 |          |       |  | <i>JAKMIP3</i>  | 3'UTR   |
| cg02531277 | 7  | 101,558,597 | 8.55E-30 | 0.204 | 0.199 |          |       |  | <i>CUX1</i>     | Body    |
| cg23361265 | 17 | 15,917,660  | 1.2E-07  | 0.204 | 0.241 |          |       |  | <i>TTC19</i>    | Body    |
| cg22157027 | 2  | 10,638,113  | 8.31E-05 | 0.204 | 0.178 |          |       |  |                 |         |
| cg25635500 | 22 | 29,712,139  | 7.91E-09 | 0.204 | 0.210 | 6.58E-15 | 0.112 |  | <i>RASL10A</i>  | TSS1500 |
| cg04523603 | 1  | 3,622,085   | 7.91E-09 | 0.204 | 0.223 |          |       |  | <i>TP73</i>     | Body    |
| cg21609154 | 13 | 113,624,991 | 8.54E-12 | 0.204 | 0.182 |          |       |  | <i>MCF2L</i>    | Body    |
| cg05824809 | 16 | 85,427,847  | 1.68E-14 | 0.204 | 0.190 |          |       |  |                 |         |
| cg13634560 | 13 | 38,173,852  | 0.01051  | 0.204 | 0.216 |          |       |  | <i>POSTN</i>    | TSS1500 |
| cg14762973 | 2  | 187,714,068 | 0.004378 | 0.204 | 0.178 |          |       |  | <i>ZSWIM2</i>   | TSS200  |
| cg04593696 | 16 | 84,076,900  | 5.18E-06 | 0.204 | 0.176 |          |       |  | <i>SLC38A8</i>  | TSS1500 |
| cg10198294 | 10 | 28,616,726  | 2.5E-06  | 0.204 | 0.200 |          |       |  |                 |         |
| cg11964308 | 12 | 54,535,018  | 0.000236 | 0.204 | 0.208 |          |       |  |                 |         |
| cg16058493 | 1  | 91,189,167  | 0.001567 | 0.204 | 0.233 |          |       |  |                 |         |
| cg13980454 | 14 | 36,985,905  | 0.000792 | 0.204 | 0.228 |          |       |  | <i>NKX2-1</i>   | 3'UTR   |
| cg13824500 | 10 | 114,394,236 | 1.51E-18 | 0.204 | 0.189 |          |       |  | <i>VTI1A</i>    | Body    |
| cg25657713 | 6  | 100,038,708 | 7.42E-07 | 0.204 | 0.212 |          |       |  |                 |         |
| cg08710739 | 12 | 111,470,672 | 2.52E-13 | 0.204 | 0.205 |          |       |  | <i>CUX2</i>     | TSS1500 |
| cg21903646 | 6  | 28,447,115  | 0.003896 | 0.204 | 0.184 |          |       |  |                 |         |



|            |    |             |          |       |       |          |       |     |                  |         |
|------------|----|-------------|----------|-------|-------|----------|-------|-----|------------------|---------|
| cg26413900 | 17 | 43,985,654  | 9.01E-06 | 0.204 | 0.173 |          |       |     | <i>MAPT</i>      | 5'UTR   |
| cg03714531 | 6  | 30,923,590  | 0.011291 | 0.204 | 0.309 |          |       |     |                  |         |
| cg17614974 | 3  | 44,039,919  | 0.007514 | 0.204 | 0.147 |          |       |     |                  |         |
| cg21121843 | 4  | 3,203,982   | 3.36E-09 | 0.204 | 0.172 |          |       |     | <i>HTT</i>       | Body    |
| cg03300078 | 11 | 1,769,522   | 0.007431 | 0.204 | 0.174 |          |       |     | <i>HCCA2</i>     | Body    |
| cg04304333 | 17 | 59,474,038  | 0.000309 | 0.204 | 0.175 |          |       |     |                  |         |
| cg06616081 | 15 | 77,336,938  | 4.57E-05 | 0.204 | 0.205 |          |       |     | <i>TSPAN3</i>    | 3'UTR   |
| cg15511120 | 11 | 6,598,119   | 5.14E-09 | 0.204 | 0.190 |          |       |     |                  |         |
| cg27651243 | 7  | 156,799,148 | 0.004599 | 0.204 | 0.216 |          |       |     | <i>MNX1</i>      | Body    |
| cg03551963 | 5  | 39,502,320  | 3.62E-07 | 0.204 | 0.171 |          |       |     |                  |         |
| cg22525581 | 12 | 54,439,112  | 3.31E-13 | 0.204 | 0.190 |          |       |     | <i>HOXC4</i>     | 5'UTR   |
| cg05152781 | 1  | 41,780,807  | 2.72E-05 | 0.204 | 0.207 |          |       | Yes |                  |         |
| cg05201970 | 5  | 45,696,206  | 5.62E-11 | 0.204 | 0.204 |          |       |     | <i>HCN1</i>      | 5'UTR   |
| cg17924813 | 4  | 15,704,844  | 0.004007 | 0.204 | 0.204 |          |       |     | <i>BST1</i>      | 1stExon |
| cg23149064 | 2  | 130,970,868 | 4.43E-10 | 0.204 | 0.183 |          |       |     |                  |         |
| cg24649332 | 20 | 45,280,359  | 3.4E-10  | 0.204 | 0.203 |          |       |     | <i>SLC13A3</i>   | 5'UTR   |
| cg03128890 | 8  | 122,558,224 | 1.35E-05 | 0.204 | 0.181 |          |       |     |                  |         |
| cg05573844 | 12 | 54,354,590  | 0.038593 | 0.204 | 0.125 |          |       |     |                  |         |
| cg14950321 | 19 | 4,530,233   | 7.12E-09 | 0.204 | 0.212 |          |       |     | <i>PLIN5</i>     | Body    |
| cg15081886 | 1  | 1,356,902   | 3E-08    | 0.204 | 0.202 |          |       |     | <i>LOC441869</i> | TSS1500 |
| cg18400079 | 4  | 7,813,911   | 1.32E-08 | 0.204 | 0.210 |          |       | Yes | <i>AFAP1</i>     | Body    |
| cg01062113 | 11 | 93,865,443  | 3.27E-25 | 0.204 | 0.189 |          |       |     | <i>PANX1</i>     | Body    |
| cg02525435 | 16 | 88,977,768  | 2.59E-07 | 0.204 | 0.215 |          |       |     | <i>CBFA2T3</i>   | 5'UTR   |
| cg22743761 | 2  | 162,273,648 | 0.015497 | 0.204 | 0.249 |          |       |     | <i>TBR1</i>      | Body    |
| cg02304584 | 6  | 31,650,790  | 7.72E-08 | 0.204 | 0.202 |          |       |     |                  |         |
| cg25869196 | 2  | 102,952,419 | 7.89E-08 | 0.204 | 0.210 |          |       |     | <i>IL1RL1</i>    | 5'UTR   |
| cg07460804 | 16 | 14,163,963  | 4.15E-07 | 0.204 | 0.182 |          |       |     | <i>MKL2</i>      | TSS1500 |
| cg10485752 | 1  | 26,021,655  | 1.41E-17 | 0.204 | 0.201 |          |       |     | <i>MAN1C1</i>    | Body    |
| cg01536979 | 8  | 117,840,383 | 1.23E-08 | 0.204 | 0.209 |          |       |     |                  |         |
| cg04066316 | 4  | 189,433,040 | 0.001659 | 0.204 | 0.252 |          |       |     |                  |         |
| cg08626653 | 7  | 100,082,322 | 4.78E-18 | 0.204 | 0.197 | 3.21E-07 | 0.059 |     | <i>C7orf51</i>   | 5'UTR   |
| cg21701379 | 12 | 31,079,694  | 0.018749 | 0.204 | 0.113 |          |       |     | <i>TSPAN11</i>   | TSS200  |
| cg21841632 | 3  | 66,853,898  | 0.000787 | 0.204 | 0.223 |          |       | Yes |                  |         |
| cg00044871 | 13 | 25,945,811  | 0.0041   | 0.204 | 0.086 |          |       |     | <i>ATP8A2</i>    | TSS1500 |

|            |    |             |          |       |       |  |  |  |                     |         |
|------------|----|-------------|----------|-------|-------|--|--|--|---------------------|---------|
| cg02423064 | 17 | 32,484,008  | 0.000315 | 0.204 | 0.239 |  |  |  | <i>ACCN1</i>        | TSS200  |
| cg05783135 | 11 | 78,092,939  | 4.24E-11 | 0.204 | 0.182 |  |  |  | <i>GAB2</i>         | Body    |
| cg13635299 | 6  | 42,409,704  | 2.09E-08 | 0.204 | 0.203 |  |  |  | <i>TRERF1</i>       | 5'UTR   |
| cg20383637 | 2  | 2,965,744   | 2.5E-05  | 0.204 | 0.165 |  |  |  |                     |         |
| cg06865612 | 2  | 946,999     | 1.25E-06 | 0.204 | 0.217 |  |  |  | <i>SNTG2</i>        | Body    |
| cg03997176 | 6  | 29,796,066  | 0.030616 | 0.204 | 0.263 |  |  |  | <i>HLA-G</i>        | Body    |
| cg04565337 | 14 | 38,071,768  | 2.53E-07 | 0.204 | 0.203 |  |  |  |                     |         |
| cg13332142 | 3  | 27,575,278  | 4.29E-07 | 0.204 | 0.185 |  |  |  |                     |         |
| cg01245155 | 2  | 205,919,517 | 3.42E-11 | 0.203 | 0.201 |  |  |  | <i>PARD3B</i>       | Body    |
| cg02219949 | 17 | 45,927,392  | 2E-05    | 0.203 | 0.156 |  |  |  | <i>SP6</i>          | 5'UTR   |
| cg04522003 | 17 | 40,913,702  | 8.61E-20 | 0.203 | 0.225 |  |  |  | <i>LOC100190938</i> | TSS1500 |
| cg16096311 | 1  | 151,693,261 | 0.008864 | 0.203 | 0.162 |  |  |  | <i>C1orf230</i>     | TSS1500 |
| cg04074004 | 6  | 31,696,462  | 1.98E-07 | 0.203 | 0.222 |  |  |  | <i>DDAH2</i>        | Body    |
| cg10708189 | 1  | 58,898,793  | 8.26E-05 | 0.203 | 0.142 |  |  |  |                     |         |
| cg11735997 | 11 | 30,039,113  | 0.024391 | 0.203 | 0.225 |  |  |  | <i>KCNA4</i>        | TSS1500 |
| cg12384499 | 15 | 89,949,617  | 0.017406 | 0.203 | 0.284 |  |  |  |                     |         |
| cg15752885 | 7  | 158,255,389 | 6.07E-08 | 0.203 | 0.195 |  |  |  | <i>PTPRN2</i>       | Body    |
| cg26328633 | 5  | 135,416,394 | 3.03E-05 | 0.203 | 0.175 |  |  |  | <i>MIR886</i>       | TSS200  |
| cg00697703 | 7  | 25,018,855  | 1.76E-05 | 0.203 | 0.162 |  |  |  | <i>OSBPL3</i>       | 5'UTR   |
| cg04694437 | 5  | 88,185,051  | 0.002316 | 0.203 | 0.163 |  |  |  | <i>MEF2C</i>        | 5'UTR   |
| cg05554161 | 9  | 127,540,080 | 4.87E-10 | 0.203 | 0.181 |  |  |  | <i>OLFML2A</i>      | Body    |
| cg17658113 | 11 | 1,413,282   | 0.000955 | 0.203 | 0.183 |  |  |  | <i>BRSK2</i>        | Body    |
| cg04837832 | 10 | 101,290,958 | 0.010642 | 0.203 | 0.168 |  |  |  |                     |         |
| cg13845094 | 12 | 81,108,034  | 1.72E-08 | 0.203 | 0.201 |  |  |  |                     |         |
| cg08632388 | 16 | 88,700,818  | 0.001045 | 0.203 | 0.191 |  |  |  |                     |         |
| cg12149609 | 20 | 42,816,600  | 1.87E-05 | 0.203 | 0.213 |  |  |  | <i>JPH2</i>         | TSS1500 |
| cg00306909 | 2  | 175,194,079 | 0.000201 | 0.203 | 0.201 |  |  |  |                     |         |
| cg03295107 | 7  | 151,236,292 | 1.87E-08 | 0.203 | 0.210 |  |  |  |                     |         |
| cg06359394 | 2  | 187,559,328 | 0.017555 | 0.203 | 0.071 |  |  |  | <i>FAM171B</i>      | Body    |
| cg11348249 | 6  | 151,560,831 | 9.56E-06 | 0.203 | 0.207 |  |  |  | <i>AKAP12</i>       | TSS1500 |
| cg25224048 | 5  | 38,467,248  | 3.63E-09 | 0.203 | 0.220 |  |  |  |                     |         |
| cg25687642 | 2  | 210,871     | 6.27E-05 | 0.203 | 0.217 |  |  |  |                     |         |
| cg16809460 | 1  | 50,885,369  | 0.038419 | 0.203 | 0.324 |  |  |  | <i>DMRTA2</i>       | Body    |
| cg12626957 | 3  | 187,770,324 | 3.18E-07 | 0.203 | 0.194 |  |  |  |                     |         |

|            |    |             |          |       |       |  |  |  |                     |         |
|------------|----|-------------|----------|-------|-------|--|--|--|---------------------|---------|
| cg13842240 | 4  | 13,539,213  | 3.33E-06 | 0.203 | 0.187 |  |  |  |                     |         |
| cg16610917 | 17 | 40,912,707  | 5.93E-11 | 0.203 | 0.196 |  |  |  | <i>LOC100190938</i> | Body    |
| cg17002328 | 14 | 91,751,773  | 3.95E-12 | 0.203 | 0.208 |  |  |  | <i>CCDC88C</i>      | Body    |
| cg18261050 | 1  | 119,551,319 | 0.034616 | 0.203 | 0.276 |  |  |  |                     |         |
| cg20811456 | 7  | 20,816,971  | 1.28E-06 | 0.203 | 0.180 |  |  |  |                     |         |
| cg24114556 | 17 | 44,897,431  | 1.41E-06 | 0.203 | 0.187 |  |  |  | <i>WNT3</i>         | TSS1500 |
| cg09313734 | 7  | 155,327,245 | 1.05E-06 | 0.203 | 0.181 |  |  |  | <i>CNPY1</i>        | TSS1500 |
| cg13348530 | 4  | 7,283,184   | 0.000698 | 0.203 | 0.187 |  |  |  | <i>SORCS2</i>       | Body    |
| cg21116900 | 12 | 100,750,760 | 0.000169 | 0.203 | 0.226 |  |  |  | <i>SLC17A8</i>      | TSS200  |
| cg19035107 | 6  | 26,745,662  | 0.027153 | 0.203 | 0.182 |  |  |  |                     |         |
| cg21412456 | 1  | 26,608,782  | 0.033698 | 0.203 | 0.237 |  |  |  | <i>UBXN11</i>       | 3'UTR   |
| cg02615468 | 3  | 58,563,618  | 0.000139 | 0.203 | 0.224 |  |  |  | <i>FAM107A</i>      | TSS200  |
| cg19249811 | 10 | 29,747,315  | 2.18E-05 | 0.203 | 0.201 |  |  |  | <i>SVIL</i>         | Body    |
| cg26978064 | 17 | 70,461,791  | 4.35E-05 | 0.203 | 0.122 |  |  |  |                     |         |
| cg00385761 | 1  | 228,131,966 | 5.45E-12 | 0.203 | 0.188 |  |  |  | <i>WNT9A</i>        | Body    |
| cg09307564 | 14 | 36,983,737  | 0.00307  | 0.203 | 0.211 |  |  |  | <i>SFTA3</i>        | TSS1500 |
| cg14632941 | 4  | 42,156,182  | 0.000153 | 0.203 | 0.207 |  |  |  | <i>BEND4</i>        | TSS1500 |
| cg22763680 | 17 | 33,815,432  | 0.006146 | 0.203 | 0.242 |  |  |  | <i>SLFN12L</i>      | Body    |
| cg07359379 | 1  | 27,445,362  | 3.17E-09 | 0.203 | 0.211 |  |  |  | <i>SLC9A1</i>       | Body    |
| cg12157761 | 15 | 71,005,778  | 1.02E-09 | 0.203 | 0.201 |  |  |  | <i>UACA</i>         | Body    |
| cg15259233 | 6  | 170,712,708 | 6.57E-09 | 0.203 | 0.232 |  |  |  | <i>FAM120B</i>      | Body    |
| cg18633230 | 7  | 151,425,104 | 4.74E-13 | 0.203 | 0.198 |  |  |  | <i>PRKAG2</i>       | Body    |
| cg27344315 | 15 | 100,560,801 | 1.01E-06 | 0.203 | 0.190 |  |  |  | <i>ADAMTS17</i>     | Body    |
| cg02138331 | 20 | 32,893,975  | 8.09E-09 | 0.203 | 0.207 |  |  |  | <i>AHCY</i>         | 5'UTR   |
| cg02430039 | 17 | 47,967,818  | 7.32E-06 | 0.203 | 0.204 |  |  |  |                     |         |
| cg07829379 | 17 | 35,294,198  | 0.039921 | 0.203 | 0.177 |  |  |  | <i>LHX1</i>         | TSS1500 |
| cg09047734 | 16 | 85,202,191  | 8.83E-06 | 0.203 | 0.185 |  |  |  |                     |         |
| cg04568799 | 3  | 197,840,782 | 0.000558 | 0.203 | 0.195 |  |  |  |                     |         |
| cg13071569 | 12 | 107,296,946 | 3.73E-05 | 0.203 | 0.187 |  |  |  |                     |         |
| cg11385476 | 6  | 138,653,150 | 2.42E-09 | 0.203 | 0.218 |  |  |  | <i>KIAA1244</i>     | Body    |
| cg24897126 | 1  | 6,474,383   | 5.8E-08  | 0.203 | 0.191 |  |  |  |                     |         |
| cg08822075 | 7  | 26,193,607  | 0.000391 | 0.203 | 0.135 |  |  |  | <i>NFE2L3</i>       | Body    |
| cg15531930 | 7  | 108,097,606 | 0.002639 | 0.203 | 0.172 |  |  |  | <i>NRCAM</i>        | TSS1500 |
| cg02800334 | 8  | 124,750,855 | 2.09E-11 | 0.203 | 0.201 |  |  |  | <i>ANXA13</i>       | TSS1500 |

|            |    |             |          |       |       |          |       |     |                 |         |
|------------|----|-------------|----------|-------|-------|----------|-------|-----|-----------------|---------|
| cg04601228 | 7  | 70,096,029  | 2.14E-11 | 0.203 | 0.191 |          |       |     | <i>AUTS2</i>    | Body    |
| cg07145664 | 6  | 2,579,591   | 5.08E-13 | 0.203 | 0.178 |          |       |     |                 |         |
| cg08531042 | 5  | 145,717,661 | 0.026873 | 0.203 | 0.262 |          |       |     | <i>POU4F3</i>   | TSS1500 |
| cg22025233 | 7  | 1,022,904   | 3.88E-09 | 0.203 | 0.167 | 3.97E-23 | 0.145 |     | <i>CYP2W1</i>   | 1stExon |
| cg22867729 | 12 | 121,622,315 | 9.67E-05 | 0.203 | 0.164 |          |       |     | <i>P2RX7</i>    | Body    |
| cg23855989 | 12 | 50,355,821  | 3.55E-06 | 0.203 | 0.184 | 4.73E-18 | 0.121 |     | <i>AQP5</i>     | 1stExon |
| cg26703880 | 11 | 78,764,003  | 2.76E-08 | 0.203 | 0.214 |          |       |     | <i>ODZ4</i>     | Body    |
| cg27027242 | 17 | 59,485,894  | 1.31E-06 | 0.203 | 0.186 |          |       |     | <i>TBX2</i>     | 3'UTR   |
| cg06148812 | 22 | 19,746,368  | 1.64E-05 | 0.203 | 0.204 |          |       |     | <i>TBX1</i>     | 5'UTR   |
| cg06319475 | 8  | 145,105,829 | 2.05E-05 | 0.203 | 0.203 |          |       |     |                 |         |
| cg19913626 | 8  | 49,533,357  | 2.01E-14 | 0.203 | 0.186 |          |       |     |                 |         |
| cg23105419 | 2  | 43,496,213  | 3.14E-08 | 0.203 | 0.196 |          |       | Yes | <i>THADA</i>    | Body    |
| cg04540882 | 17 | 27,703,877  | 5.27E-08 | 0.203 | 0.194 |          |       |     |                 |         |
| cg13382072 | 19 | 1,851,882   | 1.11E-05 | 0.203 | 0.187 |          |       |     |                 |         |
| cg19948701 | 17 | 75,471,193  | 2.66E-09 | 0.203 | 0.202 |          |       |     | <i>SEPT9</i>    | Body    |
| cg03846408 | 11 | 1,769,390   | 0.023098 | 0.203 | 0.177 |          |       |     | <i>HCCA2</i>    | Body    |
| cg23281972 | 2  | 223,610,984 | 6.79E-10 | 0.203 | 0.205 |          |       |     |                 |         |
| cg02347652 | 12 | 122,332,665 | 1.37E-14 | 0.203 | 0.186 |          |       |     | <i>PSMD9</i>    | Body    |
| cg07301952 | 18 | 158,011     | 1.25E-05 | 0.203 | 0.154 |          |       | Yes | <i>USP14</i>    | TSS1500 |
| cg19363499 | 8  | 70,983,530  | 0.01035  | 0.203 | 0.248 |          |       |     | <i>PRDM14</i>   | 1stExon |
| cg22274745 | 2  | 182,451,537 | 0.000492 | 0.203 | 0.180 |          |       |     | <i>CERKL</i>    | Body    |
| cg11775521 | 11 | 74,178,795  | 6.62E-09 | 0.203 | 0.197 |          |       |     | <i>KCNE3</i>    | TSS200  |
| cg20407792 | 6  | 32,044,203  | 2.59E-21 | 0.203 | 0.219 |          |       |     | <i>TNXB</i>     | Body    |
| cg01052699 | 4  | 171,030,995 | 0.003958 | 0.203 | 0.226 |          |       |     |                 |         |
| cg01193554 | 1  | 41,846,683  | 6.54E-05 | 0.203 | 0.153 |          |       |     |                 |         |
| cg06760238 | 10 | 134,400,036 | 3.81E-07 | 0.203 | 0.189 |          |       |     | <i>INPP5A</i>   | Body    |
| cg21695024 | 8  | 65,498,708  | 0.040127 | 0.203 | 0.274 |          |       |     |                 |         |
| cg06248480 | 7  | 107,642,453 | 0.030912 | 0.203 | 0.211 |          |       |     | <i>LAMB1</i>    | Body    |
| cg01513392 | 20 | 21,488,198  | 0.000233 | 0.203 | 0.167 |          |       |     |                 |         |
| cg06579738 | 11 | 111,165,311 | 9.39E-11 | 0.203 | 0.200 |          |       |     | <i>C11orf92</i> | 3'UTR   |
| cg22773334 | 10 | 131,569,486 | 8.13E-05 | 0.203 | 0.194 |          |       |     |                 |         |
| cg24535475 | 12 | 7,167,900   | 9.21E-07 | 0.203 | 0.214 |          |       |     | <i>C1S</i>      | TSS200  |
| cg01883635 | 2  | 45,033,155  | 0.044155 | 0.203 | 0.137 |          |       |     |                 |         |
| cg05143012 | 7  | 10,974,404  | 0.000478 | 0.203 | 0.192 |          |       |     | <i>NDUFA4</i>   | Body    |

|            |    |             |          |       |       |          |       |  |                  |         |
|------------|----|-------------|----------|-------|-------|----------|-------|--|------------------|---------|
| cg10831607 | 12 | 115,134,374 | 0.000117 | 0.203 | 0.188 |          |       |  |                  |         |
| cg21556281 | 7  | 27,154,720  | 1.56E-05 | 0.203 | 0.170 |          |       |  | <i>HOXA3</i>     | 5'UTR   |
| cg16655791 | 6  | 106,429,610 | 8.73E-07 | 0.203 | 0.228 |          |       |  |                  |         |
| cg19159759 | 13 | 20,989,818  | 3.49E-10 | 0.203 | 0.183 |          |       |  | <i>CRYL1</i>     | Body    |
| cg14297340 | 9  | 72,871,343  | 1.61E-05 | 0.203 | 0.214 |          |       |  |                  |         |
| cg14948757 | 16 | 56,669,726  | 0.000896 | 0.203 | 0.187 |          |       |  |                  |         |
| cg27502457 | 2  | 87,018,585  | 1.27E-05 | 0.203 | 0.157 |          |       |  | <i>CD8A</i>      | 5'UTR   |
| cg14918927 | 12 | 105,477,694 | 4.89E-05 | 0.203 | 0.163 |          |       |  | <i>ALDH1L2</i>   | Body    |
| cg04946274 | 2  | 127,963,067 | 1.08E-06 | 0.203 | 0.169 |          |       |  | <i>CYP27C1</i>   | 5'UTR   |
| cg10507482 | 2  | 175,198,039 | 0.027609 | 0.203 | 0.223 |          |       |  |                  |         |
| cg14832904 | 2  | 54,087,028  | 3.27E-05 | 0.203 | 0.120 | 2.89E-11 | 0.161 |  | <i>GPR75</i>     | 5'UTR   |
| cg23927970 | 11 | 504,933     | 0.005384 | 0.203 | 0.169 |          |       |  | <i>RNH1</i>      | 5'UTR   |
| cg10857167 | 12 | 126,346,276 | 0.028407 | 0.203 | 0.091 |          |       |  |                  |         |
| cg24265969 | 3  | 55,654,481  | 8.3E-05  | 0.203 | 0.122 |          |       |  | <i>ERC2</i>      | 3'UTR   |
| cg03232933 | 21 | 18,985,641  | 0.002751 | 0.203 | 0.149 |          |       |  | <i>BTG3</i>      | TSS1500 |
| cg04149978 | 1  | 10,764,896  | 8.19E-05 | 0.203 | 0.148 |          |       |  | <i>CASZ1</i>     | 5'UTR   |
| cg16416987 | 1  | 155,177,561 | 1.12E-12 | 0.203 | 0.177 |          |       |  | <i>THBS3</i>     | Body    |
| cg23719124 | 1  | 110,254,919 | 3.42E-05 | 0.203 | 0.212 | 8.66E-13 | 0.102 |  | <i>GSTM5</i>     | 1stExon |
| cg13509147 | 19 | 4,153,603   | 0.000771 | 0.203 | 0.205 | 3.16E-08 | 0.091 |  | <i>CREB3L3</i>   | TSS200  |
| cg15270687 | 6  | 90,143,634  | 0.030227 | 0.203 | 0.169 |          |       |  | <i>ANKRD6</i>    | 5'UTR   |
| cg06520812 | 19 | 46,000,742  | 0.011313 | 0.203 | 0.137 |          |       |  | <i>RTN2</i>      | TSS1500 |
| cg27170458 | 16 | 89,988,252  | 0.008258 | 0.203 | 0.193 |          |       |  | <i>TUBB3</i>     | TSS1500 |
| cg04018702 | 4  | 56,047,829  | 0.001286 | 0.203 | 0.248 |          |       |  |                  |         |
| cg07689260 | 7  | 157,381,098 | 1.07E-14 | 0.203 | 0.188 |          |       |  | <i>PTPRN2</i>    | Body    |
| cg04552418 | 1  | 31,958,245  | 0.008632 | 0.203 | 0.182 |          |       |  |                  |         |
| cg05496514 | 5  | 87,985,513  | 0.031108 | 0.203 | 0.199 |          |       |  |                  |         |
| cg06785429 | 3  | 182,699,414 | 6.39E-09 | 0.203 | 0.179 | 2.41E-21 | 0.183 |  | <i>DCUN1D1</i>   | TSS1500 |
| cg09533168 | 5  | 175,560,568 | 0.004333 | 0.203 | 0.173 |          |       |  |                  |         |
| cg14336674 | 17 | 41,995,064  | 0.002001 | 0.203 | 0.223 |          |       |  | <i>C17orf88</i>  | Body    |
| cg07257441 | 17 | 33,814,596  | 0.002014 | 0.203 | 0.165 |          |       |  | <i>SLFN12L</i>   | Body    |
| cg10572354 | X  | 99,194,929  | 0.012455 | 0.203 | 0.095 |          |       |  | <i>LOC442459</i> | TSS200  |
| cg17575906 | 5  | 111,090,585 | 3.17E-10 | 0.203 | 0.206 |          |       |  | <i>C5orf13</i>   | Body    |
| cg26339788 | X  | 153,745,603 | 6.89E-06 | 0.203 | 0.231 |          |       |  | <i>FAM3A</i>     | TSS1500 |
| cg05897316 | 3  | 40,657,497  | 3.74E-07 | 0.203 | 0.198 |          |       |  |                  |         |

|            |    |             |          |       |       |  |  |  |                |         |
|------------|----|-------------|----------|-------|-------|--|--|--|----------------|---------|
| cg09991306 | 2  | 241,975,140 | 1.3E-07  | 0.203 | 0.176 |  |  |  | <i>SNED1</i>   | Body    |
| cg22650271 | 22 | 39,760,165  | 1E-09    | 0.203 | 0.187 |  |  |  | <i>SYNGR1</i>  | Body    |
| cg26021007 | 17 | 45,283,040  | 0.000171 | 0.203 | 0.213 |  |  |  |                |         |
| cg27294268 | 14 | 36,983,518  | 0.00071  | 0.203 | 0.278 |  |  |  | <i>SFTA3</i>   | TSS1500 |
| cg08022436 | 2  | 155,555,414 | 0.002527 | 0.203 | 0.208 |  |  |  | <i>KCNJ3</i>   | 1stExon |
| cg08856033 | 2  | 121,280,078 | 4.24E-08 | 0.203 | 0.186 |  |  |  |                |         |
| cg09007447 | 1  | 114,545,478 | 1.15E-07 | 0.203 | 0.169 |  |  |  |                |         |
| cg15810815 | 6  | 114,663,139 | 0.034733 | 0.203 | 0.210 |  |  |  |                |         |
| cg19689322 | 1  | 41,284,639  | 0.008349 | 0.203 | 0.200 |  |  |  | <i>KCNQ4</i>   | Body    |
| cg25486618 | 11 | 78,136,642  | 6.97E-07 | 0.203 | 0.190 |  |  |  |                |         |
| cg07103722 | 6  | 31,370,532  | 5.72E-07 | 0.203 | 0.183 |  |  |  | <i>MICA</i>    | TSS1500 |
| cg15316660 | 21 | 38,119,920  | 0.005015 | 0.203 | 0.136 |  |  |  | <i>SIM2</i>    | Body    |
| cg22738642 | 12 | 43,137,977  | 6.54E-07 | 0.203 | 0.163 |  |  |  |                |         |
| cg27304020 | 6  | 28,956,327  | 7.1E-05  | 0.203 | 0.193 |  |  |  |                |         |
| cg00606900 | 22 | 50,175,250  | 1.14E-05 | 0.203 | 0.195 |  |  |  | <i>BRD1</i>    | Body    |
| cg26811159 | 11 | 89,223,981  | 0.003524 | 0.203 | 0.229 |  |  |  | <i>NOX4</i>    | 5'UTR   |
| cg01396530 | X  | 12,974,262  | 2.03E-06 | 0.203 | 0.206 |  |  |  |                |         |
| cg15383276 | 22 | 29,709,282  | 7.82E-06 | 0.203 | 0.189 |  |  |  | <i>RASL10A</i> | 3'UTR   |
| cg17766305 | 10 | 90,147,030  | 0.007511 | 0.203 | 0.199 |  |  |  | <i>RNLS</i>    | Body    |
| cg21046358 | 5  | 41,708,556  | 0.001944 | 0.203 | 0.173 |  |  |  |                |         |
| cg08542715 | 17 | 34,217,960  | 2.31E-07 | 0.203 | 0.163 |  |  |  |                |         |
| cg17186750 | 8  | 38,529,336  | 8.03E-06 | 0.203 | 0.201 |  |  |  |                |         |
| cg01965477 | 17 | 35,285,295  | 0.000856 | 0.203 | 0.248 |  |  |  |                |         |
| cg02268569 | 16 | 1,032,713   | 8.79E-06 | 0.203 | 0.177 |  |  |  | <i>SOX8</i>    | Body    |
| cg04747941 | 15 | 70,877,925  | 0.03469  | 0.203 | 0.130 |  |  |  |                |         |
| cg06635722 | 4  | 13,532,622  | 0.013973 | 0.203 | 0.267 |  |  |  |                |         |
| cg21581504 | 2  | 68,545,960  | 8.14E-06 | 0.203 | 0.192 |  |  |  | <i>CNRIP1</i>  | Body    |
| cg23531257 | 15 | 45,422,553  | 3.48E-07 | 0.203 | 0.184 |  |  |  | <i>DUOX1</i>   | 5'UTR   |
| cg25318296 | 13 | 100,547,785 | 0.000583 | 0.203 | 0.170 |  |  |  | <i>CLYBL</i>   | 3'UTR   |
| cg09506504 | 6  | 106,439,790 | 0.009054 | 0.203 | 0.178 |  |  |  |                |         |
| cg17035539 | 1  | 229,544,326 | 3.52E-13 | 0.203 | 0.198 |  |  |  |                |         |
| cg18825458 | 4  | 55,095,446  | 0.002748 | 0.203 | 0.258 |  |  |  | <i>PDGFRA</i>  | 1stExon |
| cg07191152 | 1  | 25,061,987  | 6.86E-11 | 0.203 | 0.198 |  |  |  |                |         |
| cg12211091 | 19 | 2,512,999   | 1.84E-07 | 0.203 | 0.181 |  |  |  | <i>GNG7</i>    | 3'UTR   |

|            |    |             |          |       |       |            |       |  |                |         |
|------------|----|-------------|----------|-------|-------|------------|-------|--|----------------|---------|
| cg13719885 | 3  | 127,795,394 | 1.5E-06  | 0.203 | 0.214 |            |       |  |                |         |
| cg21741220 | 11 | 19,367,175  | 0.031261 | 0.203 | 0.089 |            |       |  |                |         |
| cg18168924 | Y  | 7,177,888   | 6.77E-08 | 0.203 | 0.193 |            |       |  | <i>PRKY</i>    | Body    |
| cg18277979 | 9  | 79,630,127  | 0.025207 | 0.203 | 0.186 |            |       |  |                |         |
| cg23681213 | 14 | 74,180,391  | 0.003552 | 0.203 | 0.087 | 2.45E-32   | 0.190 |  | <i>PNMA1</i>   | 1stExon |
| cg03150515 | 8  | 25,836,888  | 0.001922 | 0.203 | 0.156 |            |       |  | <i>EBF2</i>    | Body    |
| cg08798295 | 7  | 98,972,169  | 0.018283 | 0.203 | 0.108 |            |       |  | <i>ARPC1B</i>  | TSS200  |
| cg22463553 | 5  | 140,788,504 | 0.00101  | 0.203 | 0.216 |            |       |  | <i>PCDHGA4</i> | Body    |
| cg17733447 | 17 | 45,929,399  | 7.35E-08 | 0.203 | 0.199 |            |       |  | <i>SP6</i>     | 5'UTR   |
| cg22517356 | 1  | 1,361,216   | 4.23E-07 | 0.203 | 0.259 |            |       |  | <i>TMEM88B</i> | TSS1500 |
| cg02286819 | 1  | 219,985,565 | 0.001213 | 0.203 | 0.200 |            |       |  |                |         |
| cg00027114 | 7  | 42,740,486  | 4.87E-06 | 0.203 | 0.226 |            |       |  |                |         |
| cg00538212 | 7  | 158,751,591 | 0.026768 | 0.203 | 0.074 |            |       |  |                |         |
| cg01647314 | 1  | 23,280,066  | 6.61E-05 | 0.203 | 0.201 |            |       |  |                |         |
| cg08739433 | 1  | 113,051,925 | 1.97E-07 | 0.203 | 0.178 |            |       |  | <i>WNT2B</i>   | Body    |
| cg13396607 | 6  | 102,055,059 | 0.033188 | 0.203 | 0.135 |            |       |  | <i>GRIK2</i>   | Body    |
| cg23369670 | 14 | 104,171,944 | 4.88E-06 | 0.203 | 0.174 |            |       |  | <i>XRCC3</i>   | Body    |
| cg24475171 | 9  | 132,598,886 | 0.004618 | 0.203 | 0.151 | 0.00000049 | 0.114 |  | <i>C9orf78</i> | TSS1500 |
| cg01495509 | 5  | 169,816,378 | 0.00194  | 0.203 | 0.186 | 1.11E-12   | 0.150 |  | <i>KCNIP1</i>  | Body    |
| cg09219093 | 3  | 184,099,259 | 1.09E-08 | 0.203 | 0.218 |            |       |  | <i>CHRD</i>    | Body    |
| cg16848712 | 12 | 46,767,747  | 0.000594 | 0.203 | 0.202 |            |       |  | <i>SLC38A2</i> | TSS1500 |
| cg03266453 | 2  | 119,606,055 | 0.001692 | 0.203 | 0.234 | 0.00289955 | 0.068 |  | <i>EN1</i>     | TSS1500 |
| cg04732324 | 11 | 68,564,292  | 9.41E-10 | 0.203 | 0.194 |            |       |  | <i>CPT1A</i>   | Body    |
| cg07278047 | 12 | 99,090,758  | 7.19E-13 | 0.203 | 0.191 |            |       |  | <i>APAF1</i>   | Body    |
| cg07984286 | 16 | 54,317,760  | 0.016104 | 0.203 | 0.207 |            |       |  | <i>IRX3</i>    | Body    |
| cg17694351 | 7  | 27,252,737  | 6.1E-05  | 0.203 | 0.176 |            |       |  |                |         |
| cg23260993 | 2  | 56,149,464  | 8.66E-08 | 0.203 | 0.209 |            |       |  | <i>EFEMP1</i>  | Body    |
| cg07917609 | 5  | 33,938,225  | 0.00027  | 0.203 | 0.175 |            |       |  | <i>RXFP3</i>   | 1stExon |
| cg16583987 | 1  | 44,509,575  | 3.23E-05 | 0.203 | 0.176 |            |       |  |                |         |
| cg18016365 | 4  | 47,033,634  | 0.045577 | 0.203 | 0.277 | 1.44E-21   | 0.176 |  | <i>GABRB1</i>  | 1stExon |
| cg18875453 | 22 | 50,517,795  | 2.37E-08 | 0.203 | 0.193 |            |       |  | <i>MLC1</i>    | Body    |
| cg24811864 | 18 | 55,019,711  | 0.007735 | 0.203 | 0.175 |            |       |  | <i>ST8SIA3</i> | TSS200  |
| cg09544050 | 8  | 143,580,965 | 0.013314 | 0.203 | 0.240 |            |       |  | <i>BAI1</i>    | Body    |
| cg26440261 | 7  | 229,594     | 9.27E-07 | 0.203 | 0.224 |            |       |  | <i>FAM20C</i>  | Body    |

|            |    |             |          |       |       |            |       |  |                 |         |
|------------|----|-------------|----------|-------|-------|------------|-------|--|-----------------|---------|
| cg08420923 | 16 | 89,436,447  | 5.09E-09 | 0.203 | 0.191 |            |       |  | <i>ANKRD11</i>  | 5'UTR   |
| cg14367229 | 13 | 28,367,741  | 0.001043 | 0.203 | 0.164 |            |       |  | <i>GSX1</i>     | Body    |
| cg23836163 | 2  | 157,393,600 | 3.32E-05 | 0.203 | 0.173 |            |       |  | <i>GPD2</i>     | Body    |
| cg25413843 | 2  | 71,126,691  | 1.53E-06 | 0.203 | 0.182 |            |       |  | <i>VAX2</i>     | TSS1500 |
| cg15856028 | 10 | 29,892,129  | 0.012207 | 0.203 | 0.123 |            |       |  | <i>SVIL</i>     | 5'UTR   |
| cg27477277 | 21 | 45,811,432  | 0.007897 | 0.203 | 0.257 |            |       |  | <i>TRPM2</i>    | Body    |
| cg18153322 | 1  | 43,534,145  | 0.008746 | 0.203 | 0.086 |            |       |  |                 |         |
| cg00721170 | 4  | 74,864,239  | 0.0481   | 0.203 | 0.047 |            |       |  | <i>CXCL5</i>    | 1stExon |
| cg00838423 | 1  | 146,552,329 | 7.31E-05 | 0.203 | 0.201 |            |       |  |                 |         |
| cg06780726 | 13 | 111,978,350 | 0.000618 | 0.203 | 0.167 |            |       |  | <i>C13orf16</i> | Body    |
| cg09858862 | 1  | 23,887,514  | 2.73E-14 | 0.203 | 0.211 |            |       |  | <i>ID3</i>      | TSS1500 |
| cg00821731 | 2  | 219,744,626 | 7.78E-10 | 0.203 | 0.210 |            |       |  | <i>WNT10A</i>   | TSS1500 |
| cg15790214 | 6  | 26,522,325  | 0.012755 | 0.203 | 0.115 |            |       |  | <i>HCG11</i>    | Body    |
| cg16362786 | 21 | 45,177,726  | 0.00082  | 0.203 | 0.237 |            |       |  | <i>PDXK</i>     | 3'UTR   |
| cg18567041 | 19 | 2,654,246   | 4.26E-06 | 0.203 | 0.215 |            |       |  | <i>GNG7</i>     | 5'UTR   |
| cg03473518 | 13 | 20,805,656  | 1.9E-05  | 0.203 | 0.169 | 0.00103223 | 0.038 |  | <i>GJB6</i>     | 5'UTR   |
| cg12913879 | 2  | 85,362,480  | 0.000145 | 0.203 | 0.198 |            |       |  | <i>TCF7L1</i>   | Body    |
| cg24860371 | 2  | 36,779,825  | 3.9E-21  | 0.203 | 0.185 |            |       |  | <i>FEZ2</i>     | 3'UTR   |
| cg25133376 | 7  | 73,392,981  | 1.16E-06 | 0.203 | 0.199 |            |       |  |                 |         |
| cg13636583 | 9  | 86,756,031  | 0.014    | 0.203 | 0.133 |            |       |  |                 |         |
| cg14807565 | 10 | 94,179,972  | 9.57E-08 | 0.203 | 0.195 |            |       |  |                 |         |
| cg19453488 | 14 | 95,330,984  | 9.74E-05 | 0.203 | 0.205 |            |       |  |                 |         |
| cg26425313 | 10 | 102,981,446 | 6.62E-06 | 0.203 | 0.182 |            |       |  |                 |         |
| cg13099429 | 14 | 70,827,109  | 0.010209 | 0.203 | 0.245 |            |       |  | <i>COX16</i>    | TSS1500 |
| cg20048045 | 10 | 73,770,523  | 1.94E-09 | 0.203 | 0.209 |            |       |  | <i>CHST3</i>    | 3'UTR   |
| cg06821199 | 4  | 779,230     | 3.56E-07 | 0.202 | 0.194 |            |       |  | <i>CPLX1</i>    | 3'UTR   |
| cg08446038 | 5  | 52,327,649  | 0.01133  | 0.202 | 0.284 |            |       |  | <i>ITGA2</i>    | Body    |
| cg08961893 | 16 | 88,966,466  | 1.07E-15 | 0.202 | 0.198 |            |       |  | <i>CBFA2T3</i>  | Body    |
| cg13765939 | 22 | 27,053,250  | 0.029817 | 0.202 | 0.220 |            |       |  | <i>MIAT</i>     | TSS1500 |
| cg09857513 | 7  | 120,969,044 | 4.92E-05 | 0.202 | 0.170 |            |       |  | <i>WNT16</i>    | TSS200  |
| cg11057205 | 8  | 134,588,243 | 7.43E-07 | 0.202 | 0.216 |            |       |  |                 |         |
| cg20473453 | X  | 15,683,007  | 0.000196 | 0.202 | 0.163 | 2.5E-11    | 0.176 |  | <i>TMEM27</i>   | 5'UTR   |
| cg23024326 | 6  | 36,761,843  | 1.6E-06  | 0.202 | 0.172 |            |       |  | <i>CPNE5</i>    | Body    |
| cg24999727 | 4  | 88,243,818  | 8.75E-13 | 0.202 | 0.202 | 0.0000262  | 0.096 |  | <i>HSD17B13</i> | 1stExon |



|            |    |             |          |       |       |          |       |  |                 |         |
|------------|----|-------------|----------|-------|-------|----------|-------|--|-----------------|---------|
| cg07868721 | 8  | 117,950,348 | 0.021567 | 0.202 | 0.139 |          |       |  | <i>C8orf85</i>  | TSS200  |
| cg11285284 | 6  | 30,709,012  | 4.02E-11 | 0.202 | 0.162 |          |       |  | <i>FLOT1</i>    | Body    |
| cg13329217 | 11 | 63,975,481  | 3.19E-05 | 0.202 | 0.210 |          |       |  | <i>FERMT3</i>   | Body    |
| cg15989892 | 4  | 41,063,747  | 3.76E-05 | 0.202 | 0.211 |          |       |  | <i>APBB2</i>    | 5'UTR   |
| cg11607648 | 3  | 116,936,427 | 1.31E-08 | 0.202 | 0.219 |          |       |  |                 |         |
| cg14843341 | 6  | 42,072,683  | 1.94E-07 | 0.202 | 0.190 |          |       |  | <i>C6orf132</i> | Body    |
| cg24384120 | 10 | 7,594,027   | 6.72E-11 | 0.202 | 0.202 |          |       |  |                 |         |
| cg09264782 | 10 | 78,004,239  | 2.17E-09 | 0.202 | 0.183 |          |       |  | <i>C10orf11</i> | Body    |
| cg10327428 | 8  | 39,172,022  | 0.009421 | 0.202 | 0.215 |          |       |  | <i>ADAM5P</i>   | TSS200  |
| cg13867326 | X  | 13,821,440  | 6.76E-10 | 0.202 | 0.191 |          |       |  | <i>GPM6B</i>    | Body    |
| cg16291048 | 1  | 153,507,498 | 1.16E-07 | 0.202 | 0.217 |          |       |  | <i>S100A6</i>   | Body    |
| cg22745397 | 4  | 42,122,161  | 1.7E-08  | 0.202 | 0.197 |          |       |  | <i>BEND4</i>    | Body    |
| cg10805850 | 13 | 98,794,470  | 0.002031 | 0.202 | 0.099 |          |       |  | <i>FARP1</i>    | TSS1500 |
| cg11098259 | 15 | 58,430,391  | 3.84E-08 | 0.202 | 0.193 | 4.85E-15 | 0.182 |  | <i>AQP9</i>     | TSS200  |
| cg27627803 | 17 | 20,744,682  | 0.000309 | 0.202 | 0.165 |          |       |  |                 |         |
| cg17055736 | 11 | 113,743,320 | 3.06E-09 | 0.202 | 0.167 |          |       |  | <i>USP28</i>    | Body    |
| cg03295417 | 16 | 14,397,892  | 7.13E-06 | 0.202 | 0.223 |          |       |  | <i>MIR193B</i>  | Body    |
| cg08005660 | 12 | 47,226,005  | 0.02943  | 0.202 | 0.154 |          |       |  |                 |         |
| cg09125999 | 11 | 117,534,685 | 0.001813 | 0.202 | 0.164 |          |       |  | <i>DSCAML1</i>  | Body    |
| cg12363903 | 5  | 134,526,269 | 3.56E-15 | 0.202 | 0.202 |          |       |  |                 |         |
| cg14637649 | 17 | 81,057,526  | 2.56E-05 | 0.202 | 0.132 |          |       |  |                 |         |
| cg14678084 | 7  | 127,627,251 | 1.27E-14 | 0.202 | 0.202 |          |       |  | <i>SND1</i>     | Body    |
| cg18128976 | 15 | 40,355,992  | 6.7E-12  | 0.202 | 0.175 |          |       |  |                 |         |
| cg20168849 | 3  | 188,995,030 | 9.2E-08  | 0.202 | 0.203 |          |       |  | <i>TPRG1</i>    | Body    |
| cg06471596 | 7  | 101,579,936 | 0.011802 | 0.202 | 0.166 |          |       |  | <i>CUX1</i>     | Body    |
| cg07166795 | 1  | 44,351,061  | 1.67E-13 | 0.202 | 0.197 |          |       |  | <i>ST3GAL3</i>  | Body    |
| cg23841186 | 12 | 53,492,662  | 5.01E-07 | 0.202 | 0.205 | 3.31E-08 | 0.112 |  | <i>IGFBP6</i>   | Body    |
| cg26736812 | 17 | 48,042,353  | 0.011804 | 0.202 | 0.272 |          |       |  |                 |         |
| cg05045335 | 1  | 8,457,417   | 0.002159 | 0.202 | 0.138 |          |       |  | <i>RERE</i>     | 5'UTR   |
| cg07914856 | 17 | 77,788,484  | 2.64E-07 | 0.202 | 0.210 |          |       |  |                 |         |
| cg09916651 | 12 | 111,620,313 | 1.6E-08  | 0.202 | 0.201 |          |       |  | <i>CUX2</i>     | Body    |
| cg19192626 | 17 | 38,708,638  | 3.1E-06  | 0.202 | 0.202 |          |       |  |                 |         |
| cg02595832 | 10 | 129,535,786 | 0.031041 | 0.202 | 0.210 |          |       |  | <i>FOXI2</i>    | 1stExon |
| cg01069159 | 5  | 161,275,865 | 0.014649 | 0.202 | 0.229 |          |       |  | <i>GABRA1</i>   | 5'UTR   |

|            |    |             |          |       |       |  |  |  |                  |         |
|------------|----|-------------|----------|-------|-------|--|--|--|------------------|---------|
| cg03330485 | 8  | 21,647,596  | 5.08E-05 | 0.202 | 0.197 |  |  |  | <i>GFRA2</i>     | TSS1500 |
| cg01931222 | 12 | 54,623,795  | 4.81E-10 | 0.202 | 0.187 |  |  |  |                  |         |
| cg08829841 | 10 | 129,535,348 | 1.53E-06 | 0.202 | 0.215 |  |  |  | <i>FOXI2</i>     | TSS200  |
| cg23657809 | 1  | 43,847,821  | 1.7E-07  | 0.202 | 0.186 |  |  |  |                  |         |
| cg00030047 | 1  | 6,268,790   | 1.1E-06  | 0.202 | 0.181 |  |  |  | <i>RNF207</i>    | Body    |
| cg00766220 | 5  | 72,598,865  | 0.001845 | 0.202 | 0.143 |  |  |  |                  |         |
| cg17801864 | 20 | 45,179,345  | 1.38E-08 | 0.202 | 0.178 |  |  |  | <i>C20orf123</i> | TSS200  |
| cg26254045 | 19 | 38,886,658  | 5.03E-10 | 0.202 | 0.189 |  |  |  | <i>SPRED3</i>    | Body    |
| cg13286281 | 22 | 21,386,999  | 0.042827 | 0.202 | 0.060 |  |  |  | <i>SLC7A4</i>    | TSS200  |
| cg18892485 | 7  | 129,417,053 | 1.03E-07 | 0.202 | 0.191 |  |  |  |                  |         |
| cg20421446 | 6  | 5,994,588   | 0.008824 | 0.202 | 0.194 |  |  |  |                  |         |
| cg00451194 | 16 | 69,141,250  | 0.032139 | 0.202 | 0.219 |  |  |  | <i>HAS3</i>      | 5'UTR   |
| cg05597624 | 1  | 44,874,524  | 0.019236 | 0.202 | 0.194 |  |  |  | <i>RNF220</i>    | 5'UTR   |
| cg08168580 | 1  | 27,729,992  | 8.3E-09  | 0.202 | 0.188 |  |  |  |                  |         |
| cg16616918 | 17 | 1,686,627   | 0.010647 | 0.202 | 0.123 |  |  |  | <i>SMYD4</i>     | Body    |
| cg19389953 | 7  | 121,939,827 | 0.003345 | 0.202 | 0.182 |  |  |  |                  |         |
| cg01064725 | 1  | 204,461,714 | 9.47E-10 | 0.202 | 0.176 |  |  |  |                  |         |
| cg01881182 | 16 | 8,806,531   | 9.25E-06 | 0.202 | 0.232 |  |  |  | <i>ABAT</i>      | 5'UTR   |
| cg09586183 | 10 | 102,890,514 | 0.001641 | 0.202 | 0.203 |  |  |  | <i>TLX1</i>      | TSS1500 |
| cg05026884 | X  | 40,032,180  | 0.000186 | 0.202 | 0.173 |  |  |  | <i>BCOR</i>      | 5'UTR   |
| cg14640149 | 2  | 216,546,226 | 0.000653 | 0.202 | 0.234 |  |  |  |                  |         |
| cg01335980 | 16 | 27,733,133  | 3.41E-08 | 0.202 | 0.199 |  |  |  | <i>KIAA0556</i>  | Body    |
| cg04743876 | 7  | 130,013,617 | 0.028702 | 0.202 | 0.143 |  |  |  |                  |         |
| cg05110133 | 20 | 3,220,565   | 0.011037 | 0.202 | 0.173 |  |  |  |                  |         |
| cg10655471 | 19 | 41,025,339  | 9.77E-05 | 0.202 | 0.155 |  |  |  | <i>SPTBN4</i>    | Body    |
| cg15193228 | 22 | 30,855,332  | 8.05E-05 | 0.202 | 0.161 |  |  |  | <i>SEC14L3</i>   | 3'UTR   |
| cg19639898 | 1  | 147,826,639 | 4.31E-05 | 0.202 | 0.174 |  |  |  |                  |         |
| cg24998096 | 5  | 115,912,261 | 0.004538 | 0.202 | 0.132 |  |  |  |                  |         |
| cg06821999 | 14 | 95,238,156  | 1.55E-05 | 0.202 | 0.186 |  |  |  |                  |         |
| cg08285151 | 7  | 18,534,872  | 0.009335 | 0.202 | 0.200 |  |  |  | <i>HDAC9</i>     | TSS1500 |
| cg08972954 | 5  | 156,680,241 | 0.000318 | 0.202 | 0.178 |  |  |  | <i>ITK</i>       | 3'UTR   |
| cg16987552 | 1  | 231,015,123 | 1.15E-07 | 0.202 | 0.222 |  |  |  |                  |         |
| cg23766360 | 12 | 6,193,688   | 2.27E-11 | 0.202 | 0.203 |  |  |  | <i>VWF</i>       | Body    |
| cg10227024 | 17 | 11,234,662  | 0.000153 | 0.202 | 0.238 |  |  |  | <i>SHISA6</i>    | Body    |

|            |    |             |          |       |       |            |       |     |  |                 |         |
|------------|----|-------------|----------|-------|-------|------------|-------|-----|--|-----------------|---------|
| cg13166642 | 10 | 134,645,995 | 0.042181 | 0.202 | 0.171 |            |       |     |  |                 |         |
| cg14560430 | 3  | 32,863,175  | 0.001691 | 0.202 | 0.183 |            |       |     |  | <i>TRIM71</i>   | Body    |
| cg15380508 | 5  | 166,874,870 | 0.011361 | 0.202 | 0.210 |            |       |     |  | <i>ODZ2</i>     | Body    |
| cg13194425 | 17 | 7,341,936   | 0.0014   | 0.202 | 0.189 |            |       |     |  | <i>FGF11</i>    | TSS1500 |
| cg16273943 | 8  | 38,175,684  | 2.15E-09 | 0.202 | 0.181 |            |       |     |  | <i>WHSC1L1</i>  | Body    |
| cg21078322 | 6  | 134,491,163 | 8.29E-16 | 0.202 | 0.203 |            |       |     |  | <i>SGK1</i>     | 3'UTR   |
| cg22061628 | 2  | 172,966,180 | 0.00036  | 0.202 | 0.176 |            |       |     |  | <i>DLX2</i>     | Body    |
| cg03100044 | 7  | 29,519,450  | 1.7E-07  | 0.202 | 0.190 |            |       |     |  | <i>CHN2</i>     | TSS200  |
| cg08143343 | 12 | 85,307,152  | 0.039812 | 0.202 | 0.251 |            |       |     |  | <i>SLC6A15</i>  | TSS1500 |
| cg09916157 | 8  | 23,584,760  | 0.003625 | 0.202 | 0.156 |            |       |     |  |                 |         |
| cg12415479 | 3  | 129,311,698 | 3.54E-08 | 0.202 | 0.213 |            |       |     |  | <i>PLXND1</i>   | Body    |
| cg04141948 | 7  | 1,023,156   | 1.24E-08 | 0.202 | 0.183 |            |       |     |  | <i>CYP2W1</i>   | Body    |
| cg07938743 | 2  | 63,283,939  | 6.96E-05 | 0.202 | 0.207 |            |       |     |  | <i>OTX1</i>     | 3'UTR   |
| cg16772514 | 17 | 43,046,872  | 5.44E-10 | 0.202 | 0.170 | 0.03906922 | 0.026 |     |  | <i>C1QL1</i>    | TSS1500 |
| cg17177536 | 10 | 19,778,008  | 8.23E-07 | 0.202 | 0.198 |            |       |     |  |                 |         |
| cg08327269 | 2  | 182,545,555 | 0.036652 | 0.202 | 0.158 |            |       |     |  | <i>NEUROD1</i>  | TSS200  |
| cg02288165 | 20 | 3,687,992   | 3.84E-07 | 0.202 | 0.243 | 2.34E-12   | 0.144 | Yes |  | <i>SIGLEC1</i>  | TSS1500 |
| cg27136994 | 15 | 81,426,534  | 0.010476 | 0.202 | 0.108 |            |       |     |  | <i>C15orf26</i> | TSS200  |
| cg00719224 | X  | 133,681,567 | 0.00604  | 0.202 | 0.239 |            |       |     |  | <i>MIR424</i>   | TSS1500 |
| cg08898055 | 5  | 179,597,395 | 2.19E-07 | 0.202 | 0.196 |            |       |     |  | <i>RASGEF1C</i> | 5'UTR   |
| cg20178764 | 5  | 137,609,835 | 0.000187 | 0.202 | 0.193 | 0.00000732 | 0.071 |     |  | <i>GFRA3</i>    | Body    |
| cg21342728 | 22 | 41,075,673  | 0.000225 | 0.202 | 0.213 | 1.85E-14   | 0.179 |     |  | <i>MCHR1</i>    | 1stExon |
| cg05214460 | 10 | 111,766,841 | 0.000305 | 0.202 | 0.169 |            |       |     |  | <i>ADD3</i>     | 5'UTR   |
| cg06895640 | 11 | 93,277,191  | 0.000807 | 0.202 | 0.131 |            |       |     |  | <i>C11orf75</i> | TSS1500 |
| cg20372821 | 17 | 40,337,892  | 6.06E-08 | 0.202 | 0.216 |            |       |     |  | <i>HCRT</i>     | TSS1500 |
| cg26500142 | 6  | 137,811,589 | 4.41E-06 | 0.202 | 0.197 |            |       |     |  |                 |         |
| cg27180671 | 17 | 65,527,566  | 0.016068 | 0.202 | 0.131 |            |       |     |  | <i>PITPNC1</i>  | Body    |
| cg03129884 | 2  | 95,692,727  | 2.36E-07 | 0.202 | 0.212 |            |       |     |  | <i>MAL</i>      | Body    |
| cg06016427 | 4  | 71,862,187  | 2.64E-10 | 0.202 | 0.199 |            |       |     |  | <i>DCK</i>      | Body    |
| cg11264878 | 10 | 47,004,362  | 0.000386 | 0.202 | 0.140 |            |       |     |  |                 |         |
| cg27353899 | 3  | 195,488,922 | 0.00011  | 0.202 | 0.197 |            |       |     |  | <i>MUC4</i>     | Body    |
| cg00018198 | 2  | 65,297,247  | 3.5E-12  | 0.202 | 0.206 |            |       |     |  | <i>CEP68</i>    | Body    |
| cg06765217 | 14 | 38,091,644  | 8.36E-05 | 0.202 | 0.207 |            |       |     |  |                 |         |
| cg11602901 | 3  | 62,354,878  | 0.013175 | 0.202 | 0.311 |            |       |     |  |                 |         |

|            |    |             |          |       |       |           |       |  |                  |         |
|------------|----|-------------|----------|-------|-------|-----------|-------|--|------------------|---------|
| cg16320249 | 17 | 46,719,761  | 0.000218 | 0.202 | 0.196 |           |       |  |                  |         |
| cg26573518 | 17 | 33,700,745  | 0.009022 | 0.202 | 0.246 |           |       |  | <i>SLFN11</i>    | TSS200  |
| cg01734772 | 7  | 65,723,664  | 1.84E-06 | 0.202 | 0.195 |           |       |  | <i>TPST1</i>     | Body    |
| cg11915218 | 17 | 40,335,849  | 0.000552 | 0.202 | 0.190 |           |       |  |                  |         |
| cg24943627 | 18 | 35,147,826  | 0.034017 | 0.202 | 0.147 |           |       |  |                  |         |
| cg05516489 | 12 | 54,359,761  | 0.003875 | 0.202 | 0.287 |           |       |  | <i>HOTAIR</i>    | Body    |
| cg18443893 | 5  | 192,103     | 1.95E-08 | 0.202 | 0.191 |           |       |  | <i>LRRC14B</i>   | 1stExon |
| cg04088697 | 7  | 96,627,050  | 0.029408 | 0.202 | 0.215 |           |       |  | <i>DLX6AS</i>    | Body    |
| cg05886620 | 7  | 1,266,180   | 0.003393 | 0.202 | 0.221 |           |       |  |                  |         |
| cg22900476 | 2  | 173,647,945 | 0.007404 | 0.202 | 0.092 |           |       |  | <i>RAPGEF4</i>   | Body    |
| cg09255732 | 1  | 32,171,050  | 0.008832 | 0.202 | 0.187 |           |       |  | <i>COL16A1</i>   | TSS1500 |
| cg14370448 | 16 | 30,103,978  | 4.61E-05 | 0.202 | 0.196 | 0.0000498 | 0.068 |  | <i>YPEL3</i>     | 3'UTR   |
| cg02151983 | 3  | 194,756,646 | 2.26E-06 | 0.202 | 0.184 |           |       |  |                  |         |
| cg09567915 | 6  | 29,717,260  | 0.013015 | 0.202 | 0.148 |           |       |  | <i>LOC285830</i> | TSS1500 |
| cg12418043 | 5  | 141,900,671 | 1.31E-10 | 0.202 | 0.209 |           |       |  |                  |         |
| cg24459147 | 21 | 38,068,581  | 0.0105   | 0.202 | 0.217 |           |       |  |                  |         |
| cg02271621 | 11 | 1,592,675   | 0.048117 | 0.202 | 0.255 | 3.35E-13  | 0.137 |  | <i>HCCA2</i>     | Body    |
| cg07412254 | 2  | 121,223,534 | 9.98E-09 | 0.202 | 0.197 | 2.75E-17  | 0.120 |  | <i>LOC84931</i>  | Body    |
| cg07609788 | 20 | 39,995,652  | 0.00087  | 0.202 | 0.147 |           |       |  | <i>EMILIN3</i>   | TSS200  |
| cg13963053 | 6  | 170,540,050 | 1.75E-09 | 0.202 | 0.188 |           |       |  |                  |         |
| cg20631351 | 19 | 711,001     | 7.47E-12 | 0.202 | 0.197 |           |       |  | <i>PALM</i>      | Body    |
| cg14247008 | 2  | 242,786,046 | 0.002113 | 0.202 | 0.230 |           |       |  |                  |         |
| cg15798862 | 7  | 76,129,360  | 0.000262 | 0.202 | 0.179 |           |       |  | <i>DTX2</i>      | Body    |
| cg02215171 | 4  | 89,379,156  | 1.6E-08  | 0.202 | 0.172 |           |       |  | <i>HERC5</i>     | Body    |
| cg02221520 | 4  | 38,859,706  | 0.00361  | 0.202 | 0.260 |           |       |  | <i>TLR6</i>      | TSS1500 |
| cg10914815 | 13 | 99,148,667  | 1.74E-07 | 0.202 | 0.182 |           |       |  | <i>STK24</i>     | Body    |
| cg18597411 | 7  | 148,394,542 | 3.19E-08 | 0.202 | 0.186 |           |       |  | <i>CUL1</i>      | TSS1500 |
| cg18749015 | 6  | 45,631,363  | 6.14E-05 | 0.202 | 0.174 |           |       |  |                  |         |
| cg00078318 | 2  | 5,837,429   | 0.010589 | 0.202 | 0.210 |           |       |  | <i>SOX11</i>     | 3'UTR   |
| cg13588388 | 9  | 138,981,584 | 2.01E-05 | 0.202 | 0.219 |           |       |  | <i>NACC2</i>     | 5'UTR   |
| cg16222581 | 7  | 926,431     | 1.14E-10 | 0.202 | 0.198 |           |       |  | <i>C7orf20</i>   | Body    |
| cg19794163 | X  | 152,157,977 | 0.000163 | 0.202 | 0.207 |           |       |  | <i>PNMA5</i>     | 3'UTR   |
| cg23145794 | 20 | 20,433,062  | 0.003603 | 0.202 | 0.211 |           |       |  | <i>RALGAPA2</i>  | Body    |
| cg00692610 | 17 | 34,996,066  | 0.00026  | 0.202 | 0.216 |           |       |  |                  |         |

|            |    |             |          |       |       |          |       |     |           |         |
|------------|----|-------------|----------|-------|-------|----------|-------|-----|-----------|---------|
| cg04508804 | 3  | 45,077,765  | 0.048513 | 0.202 | 0.259 |          |       |     |           |         |
| cg01803759 | 1  | 27,831,295  | 7.17E-14 | 0.202 | 0.198 |          |       |     |           |         |
| cg18169095 | 1  | 201,353,512 | 3.13E-08 | 0.202 | 0.190 |          |       |     | LAD1      | Body    |
| cg18943588 | 10 | 7,517,833   | 2.18E-08 | 0.202 | 0.181 |          |       |     |           |         |
| cg26336935 | 17 | 39,769,213  | 0.000223 | 0.202 | 0.207 |          |       |     | KRT16     | TSS200  |
| cg02442640 | 17 | 75,451,779  | 5.03E-12 | 0.202 | 0.179 |          |       | Yes | SEPT9     | Body    |
| cg09807817 | 14 | 50,490,901  | 7.4E-18  | 0.202 | 0.222 |          |       |     |           |         |
| cg04515200 | 5  | 135,415,762 | 0.001635 | 0.202 | 0.141 |          |       |     |           |         |
| cg05620980 | 7  | 562,844     | 0.005741 | 0.202 | 0.232 |          |       |     |           |         |
| cg09538651 | 11 | 70,001,896  | 0.001285 | 0.202 | 0.205 |          |       |     | ANO1      | Body    |
| cg13966710 | 1  | 113,392,781 | 0.008154 | 0.202 | 0.180 | 6.94E-12 | 0.120 |     |           |         |
| cg17081976 | 2  | 24,347,010  | 0.000603 | 0.202 | 0.132 |          |       |     | LOC375190 | 5'UTR   |
| cg05421688 | 1  | 179,711,859 | 0.038155 | 0.202 | 0.175 | 9.2E-11  | 0.138 |     | FAM163A   | TSS1500 |
| cg06851753 | X  | 153,745,734 | 5.07E-09 | 0.202 | 0.226 |          |       |     | FAM3A     | TSS1500 |
| cg15665400 | 2  | 133,428,652 | 0.001479 | 0.202 | 0.220 |          |       |     | LYPD1     | TSS200  |
| cg18148179 | 3  | 181,428,298 | 8.68E-06 | 0.202 | 0.177 |          |       |     | SOX2OT    | Body    |
| cg09888283 | 1  | 2,211,524   | 3.32E-06 | 0.202 | 0.219 |          |       |     | SKI       | Body    |
| cg18520238 | 11 | 36,422,557  | 0.000174 | 0.202 | 0.160 |          |       |     | PRR5L     | 5'UTR   |
| cg21307484 | 22 | 37,546,220  | 2.29E-05 | 0.202 | 0.162 |          |       |     | IL2RB     | TSS1500 |
| cg12210255 | 7  | 72,838,671  | 4.75E-05 | 0.202 | 0.185 |          |       |     |           |         |
| cg23508813 | 3  | 137,488,094 | 0.011223 | 0.202 | 0.207 |          |       |     |           |         |
| cg21466107 | 7  | 42,136,966  | 9.09E-13 | 0.202 | 0.190 |          |       |     | GLI3      | Body    |
| cg22450406 | 2  | 235,422,165 | 4.05E-15 | 0.202 | 0.182 |          |       |     |           |         |
| cg00743269 | 17 | 60,747,654  | 1.68E-06 | 0.202 | 0.215 |          |       |     | MRC2      | Body    |
| cg06650255 | 5  | 139,078,529 | 2.73E-07 | 0.202 | 0.205 |          |       |     |           |         |
| cg19963856 | 17 | 33,759,573  | 0.049138 | 0.202 | 0.170 |          |       |     | SLFN12    | TSS200  |
| cg00021242 | 15 | 29,773,425  | 2.11E-09 | 0.202 | 0.181 |          |       |     | FAM189A1  | Body    |
| cg07761358 | X  | 152,991,647 | 1.18E-12 | 0.202 | 0.215 |          |       |     | BCAP31    | TSS1500 |
| cg14831622 | 17 | 11,148,761  | 0.003129 | 0.202 | 0.141 |          |       |     | SHISA6    | Body    |
| cg17885794 | 1  | 176,521,193 | 0.002507 | 0.202 | 0.167 |          |       |     | PAPPA2    | 5'UTR   |
| cg21013395 | 17 | 73,131,789  | 2.07E-07 | 0.202 | 0.193 |          |       |     | HN1       | 3'UTR   |
| cg26985149 | 17 | 40,464,935  | 2.16E-13 | 0.202 | 0.177 |          |       |     |           |         |
| cg04366300 | 11 | 125,157,962 | 5.17E-11 | 0.202 | 0.186 |          |       |     | PKNOX2    | 5'UTR   |
| cg00808555 | 17 | 37,323,734  | 1.18E-08 | 0.202 | 0.205 |          |       |     | ARL5C     | TSS1500 |

|            |    |             |          |       |       |  |  |  |                  |         |
|------------|----|-------------|----------|-------|-------|--|--|--|------------------|---------|
| cg02035605 | 12 | 1,725,867   | 5.8E-10  | 0.202 | 0.184 |  |  |  | <i>WNT5B</i>     | TSS1500 |
| cg02709032 | 19 | 33,699,683  | 6.84E-07 | 0.202 | 0.196 |  |  |  | <i>SLC7A10</i>   | 3'UTR   |
| cg10475970 | 5  | 140,772,512 | 0.000127 | 0.202 | 0.177 |  |  |  | <i>PCDHGA4</i>   | Body    |
| cg26298967 | 6  | 108,444,791 | 5.97E-05 | 0.202 | 0.198 |  |  |  |                  |         |
| cg05447343 | 17 | 19,648,925  | 3.3E-05  | 0.202 | 0.184 |  |  |  | <i>ALDH3A1</i>   | 5'UTR   |
| cg17826956 | 1  | 77,230,619  | 1.89E-05 | 0.202 | 0.142 |  |  |  |                  |         |
| cg18177731 | 1  | 19,249,376  | 5.69E-13 | 0.202 | 0.194 |  |  |  | <i>IFFO2</i>     | Body    |
| cg23028772 | 1  | 162,601,485 | 2.6E-07  | 0.202 | 0.197 |  |  |  | <i>DDR2</i>      | TSS1500 |
| cg00240732 | 7  | 70,923,396  | 0.00016  | 0.202 | 0.118 |  |  |  | <i>WBSCR17</i>   | Body    |
| cg02019774 | 3  | 138,658,470 | 0.043051 | 0.202 | 0.268 |  |  |  |                  |         |
| cg07291445 | 7  | 39,015,928  | 0.016605 | 0.202 | 0.312 |  |  |  |                  |         |
| cg09884076 | 5  | 72,595,434  | 0.009732 | 0.202 | 0.185 |  |  |  |                  |         |
| cg10159951 | 11 | 35,441,881  | 4.46E-05 | 0.202 | 0.199 |  |  |  | <i>SLC1A2</i>    | TSS1500 |
| cg21149983 | 20 | 61,038,949  | 1.94E-11 | 0.202 | 0.205 |  |  |  | <i>GATA5</i>     | 3'UTR   |
| cg00738934 | 8  | 78,996,279  | 0.017897 | 0.202 | 0.178 |  |  |  |                  |         |
| cg07737503 | 19 | 1,132,895   | 7.32E-07 | 0.202 | 0.182 |  |  |  | <i>SBNO2</i>     | Body    |
| cg09975867 | 1  | 18,958,324  | 0.001829 | 0.202 | 0.241 |  |  |  | <i>PAX7</i>      | Body    |
| cg26154714 | 1  | 27,318,618  | 1.45E-05 | 0.202 | 0.203 |  |  |  |                  |         |
| cg01884549 | 12 | 116,997,308 | 2.46E-07 | 0.202 | 0.163 |  |  |  | <i>MAP1LC3B2</i> | 5'UTR   |
| cg10380328 | 4  | 188,953,126 | 0.000152 | 0.202 | 0.193 |  |  |  |                  |         |
| cg01230067 | 6  | 31,239,063  | 0.000579 | 0.202 | 0.183 |  |  |  | <i>HLA-C</i>     | Body    |
| cg13121428 | 14 | 76,446,161  | 1.47E-09 | 0.202 | 0.197 |  |  |  | <i>TGFB3</i>     | Body    |
| cg02795515 | 17 | 37,381,273  | 0.01719  | 0.202 | 0.294 |  |  |  | <i>STAC2</i>     | Body    |
| cg13223682 | 2  | 174,889,929 | 1.48E-06 | 0.202 | 0.190 |  |  |  |                  |         |
| cg17244980 | 10 | 49,664,616  | 2.64E-05 | 0.202 | 0.192 |  |  |  | <i>ARHGAP22</i>  | Body    |
| cg24792289 | 5  | 134,825,895 | 7.13E-06 | 0.202 | 0.189 |  |  |  |                  |         |
| cg08115618 | 8  | 134,667,555 | 2.68E-08 | 0.202 | 0.165 |  |  |  |                  |         |
| cg17129576 | 17 | 27,508,027  | 4.44E-18 | 0.202 | 0.200 |  |  |  | <i>MYO18A</i>    | TSS1500 |
| cg10504000 | 11 | 2,402,391   | 8.2E-09  | 0.202 | 0.208 |  |  |  | <i>CD81</i>      | Body    |
| cg20824939 | 1  | 205,255,082 | 3.59E-06 | 0.202 | 0.185 |  |  |  |                  |         |
| cg22630733 | 11 | 334,833     | 3.84E-15 | 0.202 | 0.195 |  |  |  |                  |         |
| cg01720455 | 2  | 176,948,343 | 0.002136 | 0.202 | 0.189 |  |  |  | <i>EVX2</i>      | 1stExon |
| cg05951084 | 12 | 54,343,681  | 0.024087 | 0.202 | 0.105 |  |  |  |                  |         |
| cg08619378 | 7  | 45,616,358  | 1.92E-10 | 0.202 | 0.188 |  |  |  | <i>ADCY1</i>     | Body    |

|            |    |             |          |       |       |          |       |     |           |         |
|------------|----|-------------|----------|-------|-------|----------|-------|-----|-----------|---------|
| cg11877061 | 2  | 71,133,502  | 5.13E-08 | 0.202 | 0.196 |          |       |     | VAX2      | Body    |
| cg26189139 | 8  | 22,560,972  | 0.000722 | 0.202 | 0.165 |          |       |     |           |         |
| cg08750510 | 5  | 32,537,617  | 2.29E-05 | 0.202 | 0.178 |          |       |     |           |         |
| cg16581347 | 6  | 114,662,739 | 3.79E-05 | 0.202 | 0.212 |          |       |     |           |         |
| cg16896911 | 19 | 33,895,690  | 8.13E-06 | 0.202 | 0.226 |          |       |     | PEPD      | Body    |
| cg17995050 | 7  | 55,073,248  | 5.25E-10 | 0.202 | 0.172 |          |       |     |           |         |
| cg02295872 | 1  | 228,131,977 | 1.5E-12  | 0.202 | 0.203 |          |       |     | WNT9A     | Body    |
| cg21410991 | 5  | 50,678,451  | 0.015312 | 0.202 | 0.146 | 3.96E-07 | 0.131 |     | ISL1      | TSS1500 |
| cg09310092 | 19 | 35,529,201  | 2.61E-07 | 0.202 | 0.201 |          |       |     | SCN1B     | Body    |
| cg15177855 | 11 | 70,517,411  | 0.000359 | 0.202 | 0.185 |          |       |     | SHANK2    | Body    |
| cg04678315 | 12 | 125,212,010 | 1.62E-05 | 0.202 | 0.174 |          |       |     |           |         |
| cg14389122 | 15 | 74,945,851  | 0.002275 | 0.202 | 0.150 |          |       |     | EDC3      | Body    |
| cg19867250 | 1  | 225,648,715 | 1.6E-08  | 0.202 | 0.222 |          |       |     |           |         |
| cg22674789 | 10 | 81,740,565  | 3.89E-06 | 0.202 | 0.162 |          |       |     |           |         |
| cg25344239 | 1  | 68,326,786  | 7.93E-08 | 0.202 | 0.174 |          |       |     |           |         |
| cg02854229 | 14 | 101,962,994 | 9.29E-09 | 0.202 | 0.209 |          |       |     |           |         |
| cg03126058 | 1  | 3,282,757   | 0.001059 | 0.202 | 0.225 |          |       |     | PRDM16    | Body    |
| cg09102864 | 11 | 68,780,892  | 0.021823 | 0.202 | 0.266 |          |       |     | MRGPRF    | TSS200  |
| cg12074541 | 2  | 1,286,641   | 0.000567 | 0.202 | 0.133 |          |       |     | SNTG2     | Body    |
| cg21579710 | 7  | 69,238,693  | 7.12E-09 | 0.202 | 0.203 |          |       |     | AUTS2     | Body    |
| cg25500444 | 11 | 86,086,101  | 0.000267 | 0.202 | 0.241 | 4.33E-08 | 0.148 |     | CCDC81    | 1stExon |
| cg19676285 | 4  | 7,967,275   | 0.001745 | 0.202 | 0.153 |          |       |     | ABLIM2    | 3'UTR   |
| cg26822097 | 22 | 17,082,581  | 0.026764 | 0.202 | 0.273 |          |       |     | psiTPTE22 | TSS1500 |
| cg02927682 | 1  | 54,844,424  | 1.51E-10 | 0.202 | 0.192 |          |       |     | SSBP3     | Body    |
| cg10436410 | 7  | 114,561,988 | 4.94E-11 | 0.202 | 0.191 |          |       |     | MDFIC     | TSS1500 |
| cg26837043 | 19 | 8,407,675   | 3.3E-10  | 0.202 | 0.165 |          |       |     | KANK3     | 5'UTR   |
| cg15744134 | 15 | 32,933,835  | 1.5E-11  | 0.202 | 0.154 |          |       |     | SCG5      | TSS200  |
| cg16731811 | 20 | 21,085,004  | 0.001141 | 0.202 | 0.199 |          |       |     |           |         |
| cg06679694 | 5  | 72,510,954  | 0.021722 | 0.202 | 0.217 |          |       |     |           |         |
| cg11853788 | 1  | 179,561,347 | 8.17E-07 | 0.202 | 0.195 |          |       |     | TDRD5     | 5'UTR   |
| cg12924402 | 2  | 218,898,511 | 0.02295  | 0.202 | 0.266 |          |       | Yes |           |         |
| cg15964018 | 1  | 19,490,180  | 7.24E-07 | 0.202 | 0.204 |          |       |     | UBR4      | Body    |
| cg04773827 | 20 | 55,201,655  | 0.000348 | 0.201 | 0.184 |          |       |     |           |         |
| cg16206813 | 5  | 3,122,162   | 0.001531 | 0.201 | 0.214 |          |       |     |           |         |

|            |    |             |          |       |       |            |       |  |                 |         |
|------------|----|-------------|----------|-------|-------|------------|-------|--|-----------------|---------|
| cg26130581 | 17 | 42,449,613  | 0.003887 | 0.201 | 0.253 |            |       |  | <i>ITGA2B</i>   | 3'UTR   |
| cg01218206 | 11 | 116,933,977 | 2.7E-05  | 0.201 | 0.187 |            |       |  | <i>SIK3</i>     | Body    |
| cg04100337 | 17 | 71,336,777  | 2.33E-06 | 0.201 | 0.197 |            |       |  | <i>SDK2</i>     | Body    |
| cg17894318 | 3  | 181,441,384 | 6.84E-06 | 0.201 | 0.182 |            |       |  | <i>SOX2OT</i>   | Body    |
| cg19980151 | 5  | 92,914,290  | 1.09E-05 | 0.201 | 0.181 |            |       |  | <i>FLJ42709</i> | Body    |
| cg21101465 | 13 | 28,493,404  | 0.004858 | 0.201 | 0.252 |            |       |  | <i>PDX1</i>     | TSS1500 |
| cg13008315 | 19 | 42,785,474  | 0.00014  | 0.201 | 0.173 |            |       |  |                 |         |
| cg02636004 | 3  | 119,747,339 | 5.79E-18 | 0.201 | 0.185 |            |       |  | <i>GSK3B</i>    | Body    |
| cg04045544 | 16 | 27,298,091  | 4.2E-08  | 0.201 | 0.211 |            |       |  |                 |         |
| cg07115767 | 7  | 19,146,255  | 0.001426 | 0.201 | 0.199 |            |       |  |                 |         |
| cg22070406 | 18 | 55,019,708  | 0.002186 | 0.201 | 0.162 |            |       |  | <i>ST8SIA3</i>  | TSS200  |
| cg22958315 | 2  | 39,295,686  | 1.35E-05 | 0.201 | 0.223 |            |       |  | <i>SOS1</i>     | Body    |
| cg23723105 | 1  | 68,150,193  | 0.005815 | 0.201 | 0.126 |            |       |  | <i>GADD45A</i>  | TSS1500 |
| cg00643651 | 1  | 245,848,375 | 5.42E-16 | 0.201 | 0.209 |            |       |  | <i>KIF26B</i>   | Body    |
| cg12011977 | 10 | 122,215,735 | 0.002289 | 0.201 | 0.094 |            |       |  | <i>PPAPDC1A</i> | TSS1500 |
| cg16438686 | 11 | 75,968,191  | 0.003632 | 0.201 | 0.193 |            |       |  |                 |         |
| cg16945312 | 6  | 1,393,028   | 0.03812  | 0.201 | 0.258 |            |       |  | <i>FOXF2</i>    | Body    |
| cg25340688 | 5  | 135,416,398 | 0.000156 | 0.201 | 0.173 |            |       |  | <i>MIR886</i>   | TSS200  |
| cg26424888 | 11 | 74,037,163  | 6.41E-12 | 0.201 | 0.187 |            |       |  |                 |         |
| cg21920775 | 1  | 114,696,641 | 0.02391  | 0.201 | 0.184 |            |       |  | <i>SYT6</i>     | TSS200  |
| cg04189328 | 14 | 24,505,653  | 4.74E-16 | 0.201 | 0.204 |            |       |  | <i>DHRS4L1</i>  | TSS200  |
| cg24358395 | 4  | 139,580,260 | 3.77E-08 | 0.201 | 0.200 |            |       |  |                 |         |
| cg05490591 | 17 | 55,648,137  | 3.48E-07 | 0.201 | 0.199 |            |       |  | <i>MSI2</i>     | Body    |
| cg05841929 | 15 | 59,730,852  | 0.004153 | 0.201 | 0.131 |            |       |  | <i>FAM81A</i>   | 5'UTR   |
| cg07672051 | 5  | 149,887,787 | 4.5E-12  | 0.201 | 0.183 |            |       |  | <i>NDST1</i>    | 5'UTR   |
| cg12718582 | 8  | 1,312,875   | 1.57E-07 | 0.201 | 0.209 |            |       |  |                 |         |
| cg07313334 | 1  | 144,533,861 | 0.000118 | 0.201 | 0.242 |            |       |  |                 |         |
| cg18492126 | 21 | 22,369,802  | 0.001535 | 0.201 | 0.181 |            |       |  | <i>NCAM2</i>    | TSS1500 |
| cg21786808 | 1  | 84,227,630  | 5.32E-09 | 0.201 | 0.182 |            |       |  |                 |         |
| cg01712452 | 20 | 56,736,072  | 5.81E-11 | 0.201 | 0.192 |            |       |  | <i>C20orf85</i> | 3'UTR   |
| cg09351315 | 17 | 77,775,823  | 6.75E-07 | 0.201 | 0.214 |            |       |  |                 |         |
| cg09403666 | 10 | 23,461,493  | 0.000598 | 0.201 | 0.218 |            |       |  |                 |         |
| cg11081272 | 11 | 78,130,236  | 1.48E-05 | 0.201 | 0.231 |            |       |  | <i>GAB2</i>     | TSS1500 |
| cg14378057 | 6  | 42,788,563  | 2.46E-11 | 0.201 | 0.205 | 0.00023513 | 0.050 |  | <i>KIAA0240</i> | TSS1500 |



|            |    |             |          |       |       |           |       |     |  |                  |         |
|------------|----|-------------|----------|-------|-------|-----------|-------|-----|--|------------------|---------|
| cg20403938 | 12 | 54,377,457  | 5E-07    | 0.201 | 0.156 |           |       |     |  | <i>HOXC10</i>    | TSS1500 |
| cg27302675 | 6  | 90,385,873  | 1.16E-07 | 0.201 | 0.223 |           |       |     |  | <i>MDN1</i>      | Body    |
| cg06572160 | 19 | 50,831,901  | 0.003828 | 0.201 | 0.188 | 1.67E-08  | 0.087 |     |  | <i>KCNC3</i>     | 1stExon |
| cg03182688 | 17 | 33,825,300  | 0.000368 | 0.201 | 0.203 |           |       |     |  | <i>SLFN12L</i>   | Body    |
| cg09178261 | 1  | 16,482,818  | 0.00043  | 0.201 | 0.159 |           |       |     |  | <i>EPHA2</i>     | TSS1500 |
| cg18022893 | 1  | 44,951,225  | 1.4E-06  | 0.201 | 0.184 |           |       |     |  | <i>RNF220</i>    | Body    |
| cg19103219 | 10 | 101,287,059 | 0.022605 | 0.201 | 0.152 |           |       |     |  |                  |         |
| cg23181580 | 11 | 22,454,301  | 0.000389 | 0.201 | 0.192 |           |       |     |  |                  |         |
| cg03536711 | 1  | 221,509,067 | 0.041675 | 0.201 | 0.127 |           |       |     |  | <i>LOC400804</i> | Body    |
| cg08472583 | 7  | 65,580,288  | 0.001094 | 0.201 | 0.180 | 3.84E-12  | 0.139 |     |  | <i>CRCP</i>      | Body    |
| cg13522244 | 7  | 116,164,762 | 0.028948 | 0.201 | 0.160 |           |       |     |  | <i>CAV1</i>      | TSS200  |
| cg16315376 | 1  | 202,679,762 | 0.01233  | 0.201 | 0.173 |           |       |     |  | <i>SYT2</i>      | TSS1500 |
| cg14190522 | 9  | 124,344,221 | 0.00233  | 0.201 | 0.198 |           |       |     |  | <i>DAB2IP</i>    | Body    |
| cg05957749 | 1  | 39,875,787  | 0.000704 | 0.201 | 0.189 |           |       |     |  | <i>KIAA0754</i>  | 5'UTR   |
| cg09850980 | 5  | 36,067,127  | 0.000173 | 0.201 | 0.224 |           |       |     |  | <i>UGT3A2</i>    | TSS200  |
| cg14793287 | 12 | 48,578,573  | 0.000122 | 0.201 | 0.197 |           |       |     |  | <i>C12orf68</i>  | 3'UTR   |
| cg07355514 | 16 | 23,420,385  | 4.57E-07 | 0.201 | 0.228 |           |       |     |  | <i>COG7</i>      | Body    |
| cg12528056 | 11 | 60,619,955  | 2.71E-24 | 0.201 | 0.179 |           |       |     |  | <i>GPR44</i>     | 3'UTR   |
| cg13835436 | 11 | 69,809,807  | 5.3E-12  | 0.201 | 0.197 |           |       |     |  |                  |         |
| cg16398581 | 1  | 59,986,591  | 4.69E-09 | 0.201 | 0.188 |           |       |     |  | <i>FGGY</i>      | Body    |
| cg23563927 | 10 | 134,755,679 | 0.006342 | 0.201 | 0.247 |           |       |     |  | <i>C10orf93</i>  | Body    |
| cg25218351 | 2  | 27,505,446  | 4.39E-09 | 0.201 | 0.187 | 2.49E-07  | 0.047 | Yes |  | <i>TRIM54</i>    | TSS200  |
| cg06770532 | 7  | 42,214,276  | 7.57E-06 | 0.201 | 0.160 |           |       |     |  | <i>GLI3</i>      | Body    |
| cg07083818 | 19 | 18,385,672  | 0.015511 | 0.201 | 0.267 |           |       |     |  | <i>KIAA1683</i>  | TSS1500 |
| cg13358623 | X  | 15,402,593  | 1.61E-11 | 0.201 | 0.200 |           |       |     |  | <i>FIGF</i>      | TSS200  |
| cg20434856 | 5  | 16,713,588  | 9.66E-07 | 0.201 | 0.187 |           |       |     |  | <i>MYO10</i>     | Body    |
| cg26651148 | 7  | 157,867,300 | 7.71E-08 | 0.201 | 0.188 |           |       |     |  | <i>PTPRN2</i>    | Body    |
| cg22283925 | 4  | 188,918,218 | 0.002353 | 0.201 | 0.188 |           |       |     |  | <i>ZFP42</i>     | 5'UTR   |
| cg25006077 | 3  | 152,176,018 | 2.97E-09 | 0.201 | 0.210 |           |       |     |  | <i>MBNL1</i>     | Body    |
| cg25312372 | 2  | 129,018,482 | 1.96E-07 | 0.201 | 0.161 |           |       |     |  |                  |         |
| cg01446393 | 3  | 58,563,609  | 2.17E-05 | 0.201 | 0.239 | 0.0000607 | 0.095 |     |  | <i>FAM107A</i>   | TSS200  |
| cg04359840 | 16 | 17,563,300  | 1.61E-09 | 0.201 | 0.194 |           |       |     |  | <i>XYLT1</i>     | Body    |
| cg11560654 | 13 | 27,317,117  | 9.09E-08 | 0.201 | 0.199 |           |       |     |  |                  |         |
| cg01959435 | 22 | 39,759,957  | 1.56E-09 | 0.201 | 0.222 |           |       |     |  | <i>SYNGR1</i>    | TSS1500 |

|            |    |             |          |       |       |            |       |     |                 |         |
|------------|----|-------------|----------|-------|-------|------------|-------|-----|-----------------|---------|
| cg02856124 | 3  | 112,736,847 | 8.1E-09  | 0.201 | 0.201 |            |       |     | <i>C3orf17</i>  | Body    |
| cg14254767 | 9  | 71,819,910  | 1.28E-07 | 0.201 | 0.219 |            |       |     | <i>TJP2</i>     | TSS200  |
| cg22180580 | 6  | 138,867,046 | 3.53E-07 | 0.201 | 0.191 |            |       |     | <i>NHSL1</i>    | Body    |
| cg25899829 | 11 | 75,046,147  | 2.01E-16 | 0.201 | 0.213 |            |       |     | <i>ARRB1</i>    | Body    |
| cg00024086 | 7  | 156,814,491 | 0.011927 | 0.201 | 0.208 |            |       |     |                 |         |
| cg04590434 | 16 | 66,369,967  | 6.53E-08 | 0.201 | 0.201 |            |       |     |                 |         |
| cg01640606 | 14 | 61,119,891  | 0.000788 | 0.201 | 0.216 |            |       |     |                 |         |
| cg03157182 | 12 | 132,655,797 | 0.000165 | 0.201 | 0.184 |            |       |     |                 |         |
| cg11944757 | 10 | 31,422,942  | 0.022142 | 0.201 | 0.242 |            |       |     |                 |         |
| cg00807586 | 3  | 38,080,790  | 0.04096  | 0.201 | 0.120 | 0.00055949 | 0.076 |     | <i>DLEC1</i>    | 1stExon |
| cg08703055 | 1  | 2,232,481   | 7.05E-05 | 0.201 | 0.204 |            |       |     | <i>SKI</i>      | Body    |
| cg26544742 | 6  | 27,533,825  | 0.030233 | 0.201 | 0.209 |            |       |     |                 |         |
| cg04468543 | 5  | 77,268,331  | 0.003247 | 0.201 | 0.177 |            |       |     |                 |         |
| cg11656547 | 9  | 72,658,747  | 0.005187 | 0.201 | 0.187 | 7.6E-18    | 0.160 |     | <i>MAMDC2</i>   | 1stExon |
| cg08379987 | 13 | 31,507,139  | 5.8E-05  | 0.201 | 0.214 |            |       |     | <i>C13orf26</i> | Body    |
| cg08462030 | 6  | 167,033,966 | 3.96E-07 | 0.201 | 0.203 |            |       |     | <i>RPS6KA2</i>  | Body    |
| cg09921610 | 4  | 41,259,866  | 0.024411 | 0.201 | 0.194 |            |       |     | <i>UCHL1</i>    | Body    |
| cg21839338 | 16 | 10,912,331  | 0.013432 | 0.201 | 0.242 |            |       |     | <i>FAM18A</i>   | Body    |
| cg04986504 | 11 | 12,031,266  | 0.001759 | 0.201 | 0.118 |            |       |     | <i>DKK3</i>     | TSS1500 |
| cg20505457 | 14 | 69,388,953  | 0.001228 | 0.201 | 0.196 |            |       |     | <i>ACTN1</i>    | Body    |
| cg26862316 | 19 | 40,792,613  | 3.1E-11  | 0.201 | 0.197 |            |       |     | <i>AKT2</i>     | TSS1500 |
| cg02172312 | 16 | 62,069,337  | 0.017638 | 0.201 | 0.235 |            |       |     | <i>CDH8</i>     | 5'UTR   |
| cg14065857 | 2  | 33,436,054  | 4.91E-05 | 0.201 | 0.221 |            |       |     | <i>LTBP1</i>    | Body    |
| cg18894552 | 14 | 53,478,112  | 3.3E-08  | 0.201 | 0.199 |            |       |     |                 |         |
| cg24724689 | 2  | 11,087,224  | 8.53E-07 | 0.201 | 0.189 |            |       |     |                 |         |
| cg09700701 | 11 | 65,816,819  | 0.000184 | 0.201 | 0.134 |            |       |     | <i>GAL3ST3</i>  | TSS200  |
| cg23572944 | 11 | 60,720,130  | 3.41E-06 | 0.201 | 0.200 |            |       |     | <i>SLC15A3</i>  | TSS1500 |
| cg01845111 | 20 | 31,446,967  | 8.55E-09 | 0.201 | 0.207 |            |       |     | <i>EFCAB8</i>   | 5'UTR   |
| cg20482760 | 11 | 78,725,125  | 1.94E-13 | 0.201 | 0.182 |            |       |     | <i>ODZ4</i>     | Body    |
| cg20606255 | 20 | 36,839,442  | 0.002081 | 0.201 | 0.251 |            |       | Yes | <i>KIAA1755</i> | 3'UTR   |
| cg09499787 | 10 | 118,900,492 | 0.016092 | 0.201 | 0.214 |            |       |     |                 |         |
| cg24109116 | 7  | 99,725,975  | 3.39E-07 | 0.201 | 0.155 |            |       |     | <i>MBLAC1</i>   | 3'UTR   |
| cg01102046 | 17 | 19,801,249  | 5.12E-12 | 0.201 | 0.207 |            |       |     |                 |         |
| cg05364567 | 17 | 5,019,761   | 0.020223 | 0.201 | 0.238 |            |       |     | <i>ZNF232</i>   | 5'UTR   |

|            |    |             |          |       |       |  |  |  |                 |         |
|------------|----|-------------|----------|-------|-------|--|--|--|-----------------|---------|
| cg07142797 | 10 | 50,605,613  | 0.040552 | 0.201 | 0.264 |  |  |  |                 |         |
| cg07546139 | 5  | 92,907,553  | 0.003061 | 0.201 | 0.086 |  |  |  | <i>FLI42709</i> | TSS1500 |
| cg23251746 | 14 | 92,047,329  | 0.002082 | 0.201 | 0.197 |  |  |  | <i>CATSPERB</i> | Body    |
| cg24430580 | 4  | 111,544,235 | 0.010717 | 0.201 | 0.123 |  |  |  | <i>PITX2</i>    | 1stExon |
| cg27212234 | 19 | 36,048,757  | 0.033811 | 0.201 | 0.165 |  |  |  | <i>ATP4A</i>    | Body    |
| cg00336800 | 19 | 1,450,386   | 0.034606 | 0.201 | 0.168 |  |  |  | <i>APC2</i>     | 5'UTR   |
| cg11576274 | 1  | 146,552,552 | 2.97E-07 | 0.201 | 0.200 |  |  |  |                 |         |
| cg00292701 | 4  | 10,463,590  | 0.005472 | 0.201 | 0.192 |  |  |  |                 |         |
| cg06410746 | 8  | 63,161,676  | 0.002031 | 0.201 | 0.110 |  |  |  | <i>NKAIN3</i>   | 1stExon |
| cg15996459 | 17 | 184,106     | 0.004566 | 0.201 | 0.122 |  |  |  | <i>RPH3AL</i>   | 5'UTR   |
| cg23195547 | 11 | 8,740,646   | 5.05E-10 | 0.201 | 0.189 |  |  |  | <i>ST5</i>      | Body    |
| cg13264840 | 7  | 142,494,213 | 0.000246 | 0.201 | 0.221 |  |  |  |                 |         |
| cg20379007 | 12 | 53,271,818  | 1.32E-05 | 0.201 | 0.188 |  |  |  |                 |         |
| cg20449659 | 11 | 32,421,752  | 0.010089 | 0.201 | 0.212 |  |  |  | <i>WT1</i>      | Body    |
| cg15757019 | 4  | 149,756,665 | 4.57E-08 | 0.201 | 0.191 |  |  |  |                 |         |
| cg00478326 | 15 | 78,978,136  | 7.81E-05 | 0.201 | 0.184 |  |  |  |                 |         |
| cg01390950 | 6  | 34,117,273  | 3.47E-07 | 0.201 | 0.194 |  |  |  |                 |         |
| cg11072570 | 13 | 24,734,180  | 2.01E-05 | 0.201 | 0.163 |  |  |  | <i>SPATA13</i>  | TSS1500 |
| cg19448837 | 18 | 48,085,671  | 0.000427 | 0.201 | 0.183 |  |  |  | <i>MAPK4</i>    | TSS1500 |
| cg24733637 | 19 | 19,050,451  | 1.26E-05 | 0.201 | 0.169 |  |  |  | <i>HOMER3</i>   | 5'UTR   |
| cg05337019 | 1  | 16,062,361  | 1.24E-11 | 0.201 | 0.201 |  |  |  | <i>SLC25A34</i> | TSS1500 |
| cg09423312 | 7  | 1,163,549   | 7.33E-08 | 0.201 | 0.200 |  |  |  | <i>C7orf50</i>  | Body    |
| cg03475509 | 4  | 85,402,143  | 0.013932 | 0.201 | 0.212 |  |  |  |                 |         |
| cg05749351 | 1  | 205,897,809 | 0.000445 | 0.201 | 0.178 |  |  |  | <i>SLC26A9</i>  | Body    |
| cg08857729 | 1  | 67,217,826  | 0.001829 | 0.201 | 0.191 |  |  |  | <i>TCTEX1D1</i> | TSS1500 |
| cg10782206 | 14 | 76,445,988  | 1.74E-11 | 0.201 | 0.225 |  |  |  | <i>TGFB3</i>    | Body    |
| cg12784175 | 10 | 103,589,988 | 6.06E-06 | 0.201 | 0.187 |  |  |  | <i>KCNIP2</i>   | Body    |
| cg03683166 | 13 | 113,611,729 | 5.3E-09  | 0.201 | 0.190 |  |  |  |                 |         |
| cg05180182 | 10 | 3,666,755   | 3.26E-05 | 0.201 | 0.186 |  |  |  |                 |         |
| cg07933656 | 17 | 20,445,757  | 0.042147 | 0.201 | 0.317 |  |  |  |                 |         |
| cg26707664 | 18 | 60,278,353  | 1.11E-05 | 0.201 | 0.163 |  |  |  |                 |         |
| cg00588853 | 16 | 29,624,485  | 0.002092 | 0.201 | 0.127 |  |  |  | <i>SLC7A5P1</i> | Body    |
| cg03474687 | 14 | 104,179,160 | 0.000474 | 0.201 | 0.161 |  |  |  | <i>XRCC3</i>    | 5'UTR   |
| cg06683487 | 16 | 936,480     | 3.77E-13 | 0.201 | 0.196 |  |  |  | <i>LMF1</i>     | Body    |

|            |    |             |          |       |       |            |       |  |                  |         |
|------------|----|-------------|----------|-------|-------|------------|-------|--|------------------|---------|
| cg09642857 | 12 | 133,026,813 | 1.99E-16 | 0.201 | 0.191 |            |       |  |                  |         |
| cg06767187 | 7  | 2,640,127   | 2.05E-11 | 0.201 | 0.197 |            |       |  | <i>IQCE</i>      | Body    |
| cg08271153 | 14 | 69,726,221  | 0.001379 | 0.201 | 0.146 |            |       |  | <i>GALNTL1</i>   | TSS1500 |
| cg18471993 | 6  | 100,917,416 | 2.06E-06 | 0.201 | 0.206 |            |       |  |                  |         |
| cg27504195 | 3  | 113,342,400 | 1.18E-14 | 0.201 | 0.193 |            |       |  | <i>SIDT1</i>     | Body    |
| cg08493294 | 2  | 25,500,416  | 0.003304 | 0.201 | 0.229 |            |       |  | <i>DNMT3A</i>    | Body    |
| cg09451215 | 6  | 82,459,960  | 0.00164  | 0.201 | 0.246 |            |       |  | <i>FAM46A</i>    | Body    |
| cg04093225 | 1  | 166,917,158 | 0.000833 | 0.201 | 0.156 |            |       |  | <i>ILDR2</i>     | Body    |
| cg10521023 | 1  | 245,411,583 | 0.039998 | 0.201 | 0.175 |            |       |  | <i>KIF26B</i>    | Body    |
| cg17662774 | 15 | 89,582,414  | 1.24E-09 | 0.201 | 0.207 |            |       |  |                  |         |
| cg22540489 | X  | 99,930,094  | 2.38E-10 | 0.201 | 0.193 |            |       |  | <i>SYTL4</i>     | 3'UTR   |
| cg03806095 | 8  | 37,655,840  | 0.01886  | 0.201 | 0.237 |            |       |  | <i>GPR124</i>    | Body    |
| cg03485172 | 13 | 95,655,579  | 0.012539 | 0.201 | 0.070 |            |       |  |                  |         |
| cg04745805 | 17 | 40,427,474  | 0.004708 | 0.201 | 0.158 | 0.00867966 | 0.033 |  | <i>STAT5B</i>    | 5'UTR   |
| cg27547291 | 2  | 201,451,026 | 3.18E-06 | 0.201 | 0.186 |            |       |  | <i>AOX1</i>      | Body    |
| cg04494873 | 5  | 72,677,287  | 0.034378 | 0.201 | 0.182 |            |       |  |                  |         |
| cg11794956 | 5  | 92,443,321  | 6.32E-08 | 0.201 | 0.184 |            |       |  |                  |         |
| cg01856887 | 6  | 36,812,436  | 1.99E-09 | 0.201 | 0.212 |            |       |  |                  |         |
| cg04834436 | 16 | 55,362,754  | 2.72E-05 | 0.201 | 0.200 |            |       |  | <i>IRX6</i>      | Body    |
| cg16668359 | 2  | 45,159,434  | 1.47E-06 | 0.201 | 0.197 |            |       |  |                  |         |
| cg21823119 | 1  | 209,601,066 | 0.003612 | 0.201 | 0.087 |            |       |  | <i>LOC642587</i> | TSS1500 |
| cg02136452 | 16 | 49,872,492  | 9.21E-05 | 0.201 | 0.166 |            |       |  |                  |         |
| cg11282156 | 3  | 63,428,840  | 0.00311  | 0.201 | 0.144 |            |       |  | <i>SYNPR</i>     | 5'UTR   |
| cg17219326 | 3  | 44,517,846  | 0.015124 | 0.201 | 0.239 |            |       |  | <i>ZNF445</i>    | 5'UTR   |
| cg25938806 | 2  | 177,028,162 | 0.007604 | 0.201 | 0.225 |            |       |  | <i>HOXD3</i>     | TSS1500 |
| cg01113339 | 7  | 1,660,895   | 0.009416 | 0.201 | 0.253 |            |       |  |                  |         |
| cg02230811 | 14 | 56,967,892  | 0.000448 | 0.201 | 0.194 |            |       |  |                  |         |
| cg08254359 | 12 | 54,398,518  | 0.003925 | 0.201 | 0.225 |            |       |  |                  |         |
| cg25383479 | 6  | 108,491,702 | 0.014767 | 0.201 | 0.244 |            |       |  | <i>NR2E1</i>     | Body    |
| cg00615241 | 19 | 839,689     | 0.001943 | 0.201 | 0.256 |            |       |  | <i>PRTN3</i>     | TSS1500 |
| cg14283328 | 11 | 66,823,587  | 9.82E-07 | 0.201 | 0.158 |            |       |  | <i>RHOD</i>      | TSS1500 |
| cg23418968 | 2  | 9,816,010   | 4.66E-07 | 0.201 | 0.205 |            |       |  |                  |         |
| cg21867733 | 12 | 124,985,584 | 9.25E-06 | 0.201 | 0.217 |            |       |  | <i>NCOR2</i>     | 5'UTR   |
| cg06135285 | 17 | 19,675,785  | 0.00454  | 0.201 | 0.153 |            |       |  | <i>ULK2</i>      | 3'UTR   |

|            |    |             |          |       |       |          |       |  |                 |         |
|------------|----|-------------|----------|-------|-------|----------|-------|--|-----------------|---------|
| cg17692403 | 20 | 42,964,959  | 1.28E-06 | 0.201 | 0.204 | 5.63E-25 | 0.175 |  | <i>R3HDML</i>   | TSS1500 |
| cg09884480 | 11 | 1,967,966   | 3.85E-10 | 0.201 | 0.199 |          |       |  | <i>MRPL23</i>   | TSS1500 |
| cg10205038 | 14 | 93,052,501  | 7.87E-06 | 0.201 | 0.177 |          |       |  | <i>RIN3</i>     | Body    |
| cg11599864 | 6  | 38,145,464  | 2.67E-18 | 0.201 | 0.187 |          |       |  | <i>BTBD9</i>    | Body    |
| cg13860928 | 1  | 209,915,875 | 2.6E-11  | 0.201 | 0.187 |          |       |  |                 |         |
| cg05281894 | 1  | 13,910,698  | 0.049988 | 0.201 | 0.386 |          |       |  | <i>PDPN</i>     | TSS1500 |
| cg05708114 | 9  | 34,624,587  | 0.00021  | 0.201 | 0.231 |          |       |  | <i>ARID3C</i>   | Body    |
| cg08045932 | 20 | 61,659,980  | 0.047051 | 0.201 | 0.220 |          |       |  |                 |         |
| cg16623710 | 22 | 45,073,049  | 1.19E-05 | 0.201 | 0.222 |          |       |  | <i>PRR5</i>     | 5'UTR   |
| cg18282388 | 11 | 129,716,470 | 0.003314 | 0.201 | 0.123 |          |       |  | <i>TMEM45B</i>  | 5'UTR   |
| cg22761176 | 2  | 173,539,542 | 0.000832 | 0.201 | 0.141 |          |       |  |                 |         |
| cg07077013 | 2  | 177,025,198 | 0.001602 | 0.201 | 0.164 |          |       |  |                 |         |
| cg10625931 | 12 | 57,632,417  | 0.000147 | 0.201 | 0.209 |          |       |  | <i>NDUFA4L2</i> | 5'UTR   |
| cg02268171 | 13 | 24,477,610  | 0.00039  | 0.201 | 0.163 |          |       |  |                 |         |
| cg06704518 | 8  | 11,565,530  | 0.026352 | 0.201 | 0.253 |          |       |  | <i>GATA4</i>    | 5'UTR   |
| cg22920300 | 3  | 181,441,364 | 0.001383 | 0.201 | 0.201 |          |       |  | <i>SOX2OT</i>   | Body    |
| cg02805028 | 16 | 27,899,239  | 0.000137 | 0.201 | 0.167 | 1.51E-14 | 0.124 |  | <i>GSG1L</i>    | Body    |
| cg19247475 | 5  | 140,789,745 | 5.47E-06 | 0.201 | 0.212 |          |       |  | <i>PCDHGA4</i>  | Body    |
| cg21667069 | 11 | 67,778,641  | 1.13E-10 | 0.201 | 0.198 |          |       |  | <i>ALDH3B1</i>  | 5'UTR   |
| cg17200920 | 7  | 127,808,798 | 0.039011 | 0.201 | 0.192 |          |       |  |                 |         |
| cg01511557 | 1  | 50,514,319  | 2.62E-05 | 0.201 | 0.197 |          |       |  | <i>ELAVL4</i>   | Body    |
| cg05746227 | 5  | 54,516,830  | 0.00145  | 0.201 | 0.196 |          |       |  |                 |         |
| cg02721065 | 8  | 120,932,635 | 2.67E-10 | 0.201 | 0.167 |          |       |  | <i>DEPDC6</i>   | Body    |
| cg08523865 | 2  | 124,782,253 | 0.008709 | 0.201 | 0.168 |          |       |  | <i>CNTNAP5</i>  | TSS1500 |
| cg09768257 | 8  | 11,628,346  | 2.16E-07 | 0.201 | 0.187 |          |       |  | <i>NEIL2</i>    | 5'UTR   |
| cg10425245 | 5  | 168,454,709 | 0.006954 | 0.201 | 0.128 |          |       |  | <i>SLIT3</i>    | Body    |
| cg23511157 | 7  | 123,241,752 | 0.002396 | 0.201 | 0.210 |          |       |  |                 |         |
| cg23719713 | 6  | 10,586,167  | 1.17E-11 | 0.201 | 0.192 |          |       |  | <i>GCNT2</i>    | Body    |
| cg00346985 | 1  | 46,940,516  | 9.51E-08 | 0.201 | 0.208 |          |       |  |                 |         |
| cg08008352 | 16 | 27,322,356  | 3.91E-07 | 0.201 | 0.183 |          |       |  |                 |         |
| cg12623364 | 4  | 109,038,130 | 6.85E-08 | 0.201 | 0.187 |          |       |  | <i>LEF1</i>     | Body    |
| cg14394264 | 11 | 46,121,221  | 2.61E-06 | 0.201 | 0.210 |          |       |  | <i>PHF21A</i>   | 5'UTR   |
| cg16922753 | 8  | 1,113,291   | 5.18E-06 | 0.201 | 0.203 |          |       |  |                 |         |
| cg25410785 | 5  | 3,597,760   | 0.005182 | 0.201 | 0.224 |          |       |  | <i>IRX1</i>     | Body    |

|            |    |             |          |       |       |  |  |  |                 |         |
|------------|----|-------------|----------|-------|-------|--|--|--|-----------------|---------|
| cg26177041 | 4  | 114,389,632 | 4.47E-07 | 0.201 | 0.188 |  |  |  | <i>CAMK2D</i>   | Body    |
| cg02139871 | 2  | 127,783,370 | 0.040513 | 0.201 | 0.158 |  |  |  |                 |         |
| cg03201044 | 20 | 55,203,291  | 0.000286 | 0.201 | 0.166 |  |  |  | <i>TFAP2C</i>   | TSS1500 |
| cg07547765 | 17 | 46,685,448  | 4.88E-08 | 0.201 | 0.178 |  |  |  | <i>HOXB7</i>    | Body    |
| cg08891110 | 15 | 96,952,425  | 0.007229 | 0.201 | 0.193 |  |  |  |                 |         |
| cg22216643 | 17 | 74,704,158  | 1.98E-12 | 0.201 | 0.219 |  |  |  | <i>MXRA7</i>    | Body    |
| cg25596082 | 10 | 43,626,561  | 0.000428 | 0.201 | 0.208 |  |  |  |                 |         |
| cg08027484 | 6  | 10,556,523  | 0.021909 | 0.201 | 0.148 |  |  |  | <i>GCNT2</i>    | 5'UTR   |
| cg02416510 | 8  | 54,791,763  | 5.51E-05 | 0.201 | 0.197 |  |  |  | <i>RGS20</i>    | Body    |
| cg20138186 | 10 | 102,642,655 | 2.46E-09 | 0.201 | 0.199 |  |  |  |                 |         |
| cg10053507 | 1  | 15,307,522  | 2.45E-08 | 0.201 | 0.191 |  |  |  | <i>KIAA1026</i> | Body    |
| cg10989634 | 1  | 111,813,745 | 4.11E-07 | 0.201 | 0.187 |  |  |  |                 |         |
| cg05759150 | 10 | 124,906,565 | 0.000347 | 0.201 | 0.099 |  |  |  | <i>HMX2</i>     | TSS1500 |
| cg12414301 | 5  | 137,224,213 | 0.041236 | 0.201 | 0.127 |  |  |  | <i>PKD2L2</i>   | TSS1500 |
| cg13372879 | 2  | 172,948,073 | 0.029881 | 0.201 | 0.135 |  |  |  |                 |         |
| cg15721145 | 20 | 61,867,205  | 0.013029 | 0.201 | 0.103 |  |  |  | <i>BIRC7</i>    | TSS200  |
| cg15895690 | 14 | 60,982,635  | 4.84E-05 | 0.201 | 0.154 |  |  |  |                 |         |
| cg03638905 | 5  | 72,595,625  | 0.000167 | 0.201 | 0.161 |  |  |  |                 |         |
| cg10431747 | 1  | 34,642,383  | 0.003921 | 0.201 | 0.142 |  |  |  | <i>C1orf94</i>  | 5'UTR   |
| cg05913684 | 19 | 710,906     | 6.01E-22 | 0.201 | 0.217 |  |  |  | <i>PALM</i>     | Body    |
| cg14334338 | 14 | 75,115,531  | 0.007659 | 0.201 | 0.166 |  |  |  |                 |         |
| cg02923300 | X  | 68,759,322  | 9.88E-14 | 0.201 | 0.194 |  |  |  |                 |         |
| cg13420848 | 1  | 197,888,894 | 0.004593 | 0.201 | 0.258 |  |  |  | <i>LHX9</i>     | Body    |
| cg18318006 | 10 | 97,169,147  | 0.000233 | 0.201 | 0.231 |  |  |  | <i>SORBS1</i>   | Body    |
| cg24683041 | 14 | 100,413,076 | 0.000623 | 0.201 | 0.190 |  |  |  |                 |         |
| cg06428163 | 13 | 96,204,856  | 0.027554 | 0.201 | 0.238 |  |  |  | <i>CLDN10</i>   | TSS200  |
| cg07314530 | 7  | 162,691     | 2.3E-10  | 0.201 | 0.201 |  |  |  |                 |         |
| cg09439204 | 12 | 54,090,464  | 0.000238 | 0.201 | 0.122 |  |  |  |                 |         |
| cg19644991 | 5  | 122,482,336 | 3.98E-14 | 0.201 | 0.169 |  |  |  | <i>PRDM6</i>    | Body    |
| cg21837192 | 12 | 54,398,765  | 0.029438 | 0.201 | 0.162 |  |  |  |                 |         |
| cg01266287 | 16 | 66,959,833  | 1.28E-08 | 0.201 | 0.196 |  |  |  | <i>RRAD</i>     | TSS1500 |
| cg03199745 | 12 | 54,454,445  | 1.7E-10  | 0.201 | 0.185 |  |  |  | <i>FLJ12825</i> | Body    |
| cg15462879 | X  | 133,930,054 | 0.000117 | 0.201 | 0.206 |  |  |  | <i>FAM122B</i>  | Body    |
| cg20491406 | 1  | 201,693,818 | 3.51E-12 | 0.201 | 0.196 |  |  |  | <i>NAV1</i>     | Body    |

|            |    |             |          |       |       |          |       |  |                |         |
|------------|----|-------------|----------|-------|-------|----------|-------|--|----------------|---------|
| cg20841748 | 17 | 40,838,078  | 1.43E-05 | 0.201 | 0.211 |          |       |  | <i>CNTNAP1</i> | Body    |
| cg08753468 | 7  | 71,911,541  | 9.35E-08 | 0.200 | 0.190 |          |       |  |                |         |
| cg11539695 | 6  | 32,287,314  | 9.08E-10 | 0.200 | 0.182 |          |       |  | <i>C6orf10</i> | Body    |
| cg14526039 | 3  | 49,210,221  | 3.13E-12 | 0.200 | 0.199 |          |       |  | <i>KLHDC8B</i> | Body    |
| cg21476940 | 1  | 160,854,954 | 0.00367  | 0.200 | 0.152 | 1.91E-13 | 0.145 |  | <i>ITLN1</i>   | 5'UTR   |
| cg23521507 | 14 | 52,519,112  | 0.010591 | 0.200 | 0.206 |          |       |  | <i>NID2</i>    | Body    |
| cg26363759 | 1  | 9,377,984   | 7.67E-25 | 0.200 | 0.206 |          |       |  | <i>SPSB1</i>   | 5'UTR   |
| cg00509207 | 12 | 31,078,979  | 7.14E-11 | 0.200 | 0.200 |          |       |  | <i>TSPAN11</i> | TSS1500 |
| cg02571636 | 4  | 188,953,906 | 0.003759 | 0.200 | 0.230 |          |       |  |                |         |
| cg16324409 | 4  | 3,416,370   | 2.55E-18 | 0.200 | 0.196 |          |       |  | <i>RGS12</i>   | Body    |
| cg27346356 | 19 | 19,648,914  | 0.049018 | 0.200 | 0.007 |          |       |  | <i>CILP2</i>   | TSS200  |
| cg02539682 | 12 | 54,132,444  | 0.013791 | 0.200 | 0.206 |          |       |  |                |         |
| cg09214412 | 15 | 93,614,970  | 1.74E-09 | 0.200 | 0.189 |          |       |  | <i>RGMA</i>    | Body    |
| cg15505412 | 5  | 3,596,996   | 0.032389 | 0.200 | 0.257 |          |       |  | <i>IRX1</i>    | Body    |
| cg06991732 | 8  | 94,934,036  | 0.035467 | 0.200 | 0.246 |          |       |  | <i>PDP1</i>    | 5'UTR   |
| cg09578028 | 2  | 176,987,411 | 0.001326 | 0.200 | 0.174 |          |       |  | <i>HOXD9</i>   | TSS200  |
| cg17573301 | 5  | 72,732,265  | 0.015127 | 0.200 | 0.187 |          |       |  |                |         |
| cg23373640 | 14 | 65,696,480  | 0.000942 | 0.200 | 0.188 |          |       |  |                |         |
| cg23689615 | 15 | 74,228,839  | 0.007839 | 0.200 | 0.168 |          |       |  | <i>LOXL1</i>   | Body    |
| cg14519952 | 12 | 124,491,432 | 0.000592 | 0.200 | 0.179 |          |       |  | <i>ZNF664</i>  | 5'UTR   |
| cg15230985 | 17 | 78,753,887  | 3.02E-13 | 0.200 | 0.186 |          |       |  | <i>RPTOR</i>   | Body    |
| cg16921727 | 7  | 51,539,678  | 0.002801 | 0.200 | 0.183 |          |       |  |                |         |
| cg26817546 | 5  | 135,538,704 | 5.44E-09 | 0.200 | 0.194 |          |       |  |                |         |
| cg26869615 | 11 | 20,044,639  | 0.000614 | 0.200 | 0.145 |          |       |  | <i>NAV2</i>    | Body    |
| cg27287745 | 14 | 61,104,967  | 0.001736 | 0.200 | 0.159 |          |       |  |                |         |
| cg04875821 | 15 | 68,253,897  | 8.35E-11 | 0.200 | 0.191 |          |       |  |                |         |
| cg05543030 | 2  | 45,005,364  | 1.72E-07 | 0.200 | 0.192 |          |       |  |                |         |
| cg07264048 | 6  | 10,556,326  | 0.018    | 0.200 | 0.131 |          |       |  | <i>GCNT2</i>   | 5'UTR   |
| cg09258689 | 12 | 132,853,954 | 0.000246 | 0.200 | 0.243 |          |       |  | <i>GALNT9</i>  | Body    |
| cg24864203 | 5  | 61,612,144  | 1.88E-13 | 0.200 | 0.197 |          |       |  | <i>KIF2A</i>   | Body    |
| cg08841257 | 8  | 10,191,002  | 5.24E-09 | 0.200 | 0.164 |          |       |  | <i>MSRA</i>    | Body    |
| cg16747109 | 4  | 111,544,463 | 0.037687 | 0.200 | 0.155 |          |       |  | <i>PITX2</i>   | TSS1500 |
| cg20271511 | 22 | 17,566,989  | 0.000185 | 0.200 | 0.189 |          |       |  | <i>IL17RA</i>  | Body    |
| cg00512872 | 7  | 6,268,584   | 8.39E-07 | 0.200 | 0.181 |          |       |  | <i>CYTH3</i>   | Body    |

|            |    |             |          |       |       |          |       |     |                  |         |
|------------|----|-------------|----------|-------|-------|----------|-------|-----|------------------|---------|
| cg01462856 | 13 | 108,922,745 | 1.54E-05 | 0.200 | 0.164 |          |       |     | <i>TNFSF13B</i>  | Body    |
| cg07600193 | 5  | 1,228,443   | 0.014423 | 0.200 | 0.154 |          |       |     | <i>SLC6A18</i>   | Body    |
| cg11554566 | 21 | 47,398,596  | 0.015767 | 0.200 | 0.226 |          |       |     |                  |         |
| cg26805263 | 13 | 24,212,312  | 0.000613 | 0.200 | 0.182 |          |       |     | <i>TNFRSF19</i>  | Body    |
| cg01478204 | 11 | 44,339,330  | 0.005927 | 0.200 | 0.276 |          |       |     |                  |         |
| cg03642555 | 5  | 34,502,788  | 2.79E-07 | 0.200 | 0.228 |          |       |     |                  |         |
| cg14376467 | 4  | 86,851,411  | 0.00056  | 0.200 | 0.211 |          |       |     | <i>ARHGAP24</i>  | Body    |
| cg15201175 | 5  | 115,889,873 | 2.51E-07 | 0.200 | 0.201 |          |       | Yes | <i>SEMA6A</i>    | 5'UTR   |
| cg24871089 | 17 | 184,131     | 0.022929 | 0.200 | 0.102 |          |       |     | <i>RPH3AL</i>    | 5'UTR   |
| cg01593673 | 17 | 46,648,014  | 0.000309 | 0.200 | 0.206 |          |       |     | <i>HOXB3</i>     | 5'UTR   |
| cg13584882 | 10 | 74,836,656  | 0.010374 | 0.200 | 0.210 |          |       |     | <i>P4HA1</i>     | 5'UTR   |
| cg13655341 | 17 | 79,859,826  | 0.010816 | 0.200 | 0.142 |          |       |     | <i>NPB</i>       | TSS1500 |
| cg05356496 | 7  | 107,300,998 | 0.000199 | 0.200 | 0.154 |          |       |     | <i>SLC26A4</i>   | TSS200  |
| cg26924825 | 16 | 67,977,865  | 2.86E-10 | 0.200 | 0.201 | 7.75E-11 | 0.112 |     | <i>SLC12A4</i>   | 3'UTR   |
| cg02086801 | 5  | 76,928,406  | 0.001566 | 0.200 | 0.181 |          |       |     | <i>OTP</i>       | Body    |
| cg24394819 | 17 | 78,725,049  | 7.95E-05 | 0.200 | 0.188 |          |       |     | <i>RPTOR</i>     | Body    |
| cg00631329 | 6  | 26,305,371  | 0.005329 | 0.200 | 0.239 |          |       |     |                  |         |
| cg07709606 | 2  | 17,699,243  | 4.73E-06 | 0.200 | 0.218 |          |       |     | <i>RAD51AP2</i>  | 1stExon |
| cg17472111 | 11 | 75,287,721  | 1.25E-07 | 0.200 | 0.155 |          |       |     |                  |         |
| cg06594404 | 4  | 380,396     | 0.001819 | 0.200 | 0.230 |          |       |     |                  |         |
| cg12261451 | 13 | 22,243,030  | 5.95E-06 | 0.200 | 0.187 |          |       |     |                  |         |
| cg16127759 | 1  | 110,613,596 | 2.68E-06 | 0.200 | 0.175 |          |       |     | <i>ALX3</i>      | TSS1500 |
| cg00561634 | 16 | 54,085,398  | 5.42E-07 | 0.200 | 0.192 |          |       |     | <i>FTO</i>       | Body    |
| cg16263367 | 19 | 53,935,096  | 9.29E-07 | 0.200 | 0.209 |          |       |     | <i>ZNF761</i>    | TSS200  |
| cg04959790 | 11 | 47,278,977  | 0.002126 | 0.200 | 0.140 |          |       |     | <i>NR1H3</i>     | 5'UTR   |
| cg19801921 | 1  | 63,784,864  | 0.035692 | 0.200 | 0.266 |          |       |     |                  |         |
| cg24067150 | 6  | 30,956,397  | 0.001496 | 0.200 | 0.209 |          |       |     | <i>MUC21</i>     | 3'UTR   |
| cg25507767 | 7  | 138,483,143 | 2.21E-05 | 0.200 | 0.175 |          |       |     | <i>TMEM213</i>   | Body    |
| cg12588880 | 2  | 8,597,159   | 0.024588 | 0.200 | 0.196 |          |       |     |                  |         |
| cg01803928 | 13 | 50,701,619  | 0.001693 | 0.200 | 0.177 |          |       |     |                  |         |
| cg02489908 | 17 | 6,946,086   | 0.000126 | 0.200 | 0.204 |          |       |     | <i>SLC16A11</i>  | Body    |
| cg04714041 | 19 | 35,068,710  | 0.015316 | 0.200 | 0.226 |          |       |     | <i>LOC643719</i> | TSS200  |
| cg09119776 | 10 | 104,387,263 | 1.72E-06 | 0.200 | 0.210 |          |       |     | <i>SUFU</i>      | Body    |
| cg19570154 | 2  | 5,513,337   | 0.013069 | 0.200 | 0.196 |          |       |     |                  |         |



|            |    |             |          |       |       |         |       |  |                 |         |
|------------|----|-------------|----------|-------|-------|---------|-------|--|-----------------|---------|
| cg02241397 | 1  | 47,698,081  | 0.015585 | 0.200 | 0.270 |         |       |  |                 |         |
| cg03711485 | 10 | 101,296,036 | 0.0007   | 0.200 | 0.180 |         |       |  | <i>NKX2-3</i>   | 3'UTR   |
| cg16609021 | 7  | 157,754,648 | 0.021393 | 0.200 | 0.127 |         |       |  | <i>PTPRN2</i>   | Body    |
| cg16847760 | 8  | 28,912,915  | 2.06E-07 | 0.200 | 0.200 |         |       |  |                 |         |
| cg08084806 | 6  | 28,574,524  | 0.011328 | 0.200 | 0.285 |         |       |  |                 |         |
| cg03946955 | 1  | 156,096,301 | 0.00154  | 0.200 | 0.250 |         |       |  | <i>LMNA</i>     | Body    |
| cg07721547 | 22 | 42,475,119  | 8.62E-07 | 0.200 | 0.178 |         |       |  | <i>C22orf32</i> | TSS1500 |
| cg11991058 | 2  | 168,150,602 | 0.028567 | 0.200 | 0.203 |         |       |  |                 |         |
| cg16087826 | 5  | 131,654,574 | 5E-07    | 0.200 | 0.210 |         |       |  | <i>SLC22A4</i>  | Body    |
| cg17075808 | 2  | 225,774,214 | 0.000809 | 0.200 | 0.143 |         |       |  | <i>DOCK10</i>   | Body    |
| cg02331883 | 5  | 140,798,095 | 0.006128 | 0.200 | 0.168 |         |       |  | <i>PCDHGA4</i>  | Body    |
| cg03742238 | 4  | 41,748,676  | 0.027904 | 0.200 | 0.267 |         |       |  | <i>PHOX2B</i>   | Body    |
| cg25361506 | 1  | 201,426,290 | 5.8E-09  | 0.200 | 0.179 |         |       |  |                 |         |
| cg05134015 | 14 | 36,973,365  | 0.012343 | 0.200 | 0.240 |         |       |  | <i>SFTA3</i>    | Body    |
| cg17851496 | 22 | 46,368,649  | 2.5E-05  | 0.200 | 0.189 |         |       |  | <i>WNT7B</i>    | Body    |
| cg20890210 | 8  | 73,450,181  | 0.001879 | 0.200 | 0.201 | 1.2E-26 | 0.207 |  | <i>KCNB2</i>    | 5'UTR   |
| cg24129390 | 13 | 33,780,205  | 0.006069 | 0.200 | 0.149 |         |       |  | <i>STARD13</i>  | TSS200  |
| cg07962934 | 8  | 144,809,621 | 2.49E-07 | 0.200 | 0.167 |         |       |  | <i>FAM83H</i>   | Body    |
| cg09412707 | 4  | 26,085,653  | 0.015767 | 0.200 | 0.273 |         |       |  |                 |         |
| cg01799681 | 6  | 11,043,368  | 2.33E-05 | 0.200 | 0.199 |         |       |  | <i>ELOVL2</i>   | Body    |
| cg18888464 | 14 | 76,597,657  | 0.020463 | 0.200 | 0.186 |         |       |  |                 |         |
| cg26083180 | 6  | 99,272,089  | 0.042354 | 0.200 | 0.270 |         |       |  |                 |         |
| cg00025643 | 1  | 37,904,694  | 1.65E-08 | 0.200 | 0.181 |         |       |  |                 |         |
| cg05268769 | 14 | 75,733,932  | 0.021883 | 0.200 | 0.231 |         |       |  |                 |         |
| cg08846079 | 1  | 110,420,044 | 1.28E-06 | 0.200 | 0.185 |         |       |  |                 |         |
| cg10646968 | 10 | 111,728,983 | 1.29E-15 | 0.200 | 0.183 |         |       |  |                 |         |
| cg18449739 | 12 | 113,495,701 | 5.84E-08 | 0.200 | 0.201 |         |       |  | <i>DTX1</i>     | 1stExon |
| cg05572456 | 2  | 172,961,504 | 0.013665 | 0.200 | 0.116 |         |       |  |                 |         |
| cg07480640 | 3  | 64,211,328  | 1.06E-05 | 0.200 | 0.187 |         |       |  | <i>PRICKLE2</i> | TSS200  |
| cg08637438 | 17 | 70,113,856  | 0.015886 | 0.200 | 0.223 |         |       |  |                 |         |
| cg20907051 | 1  | 47,999,516  | 1.88E-06 | 0.200 | 0.180 |         |       |  |                 |         |
| cg11491247 | 1  | 155,035,530 | 0.009097 | 0.200 | 0.115 |         |       |  | <i>EFNA4</i>    | TSS1500 |
| cg11510131 | 12 | 120,679,618 | 1.91E-10 | 0.200 | 0.201 |         |       |  | <i>PXN</i>      | 5'UTR   |
| cg12150256 | 3  | 50,359,849  | 7.24E-08 | 0.200 | 0.212 |         |       |  | <i>HYAL2</i>    | 5'UTR   |

|            |    |             |          |        |        |  |  |  |                  |         |
|------------|----|-------------|----------|--------|--------|--|--|--|------------------|---------|
| cg05928806 | 7  | 127,991,614 | 7.86E-05 | 0.200  | 0.203  |  |  |  | <i>PRRT4</i>     | Body    |
| cg18181703 | 17 | 76,354,621  | 1.98E-07 | 0.200  | 0.219  |  |  |  | <i>SOCS3</i>     | Body    |
| cg03465513 | 13 | 28,550,046  | 1.03E-05 | 0.200  | 0.159  |  |  |  |                  |         |
| cg05461270 | 6  | 28,574,608  | 0.030618 | 0.200  | 0.213  |  |  |  |                  |         |
| cg21982455 | 5  | 2,757,976   | 0.014275 | 0.200  | 0.210  |  |  |  |                  |         |
| cg04729004 | 7  | 128,550,932 | 2.73E-19 | 0.200  | 0.190  |  |  |  | <i>KCP</i>       | TSS200  |
| cg22770911 | 10 | 8,101,307   | 8.67E-08 | 0.200  | 0.172  |  |  |  | <i>GATA3</i>     | Body    |
| cg15394142 | 12 | 66,275,988  | 0.04514  | 0.200  | 0.264  |  |  |  | <i>HMGGA2</i>    | Body    |
| cg02627991 | 7  | 74,032,045  | 0.048997 | 0.200  | 0.169  |  |  |  |                  |         |
| cg08757574 | X  | 70,273,027  | 4.08E-09 | 0.200  | 0.217  |  |  |  |                  |         |
| cg19725377 | 14 | 69,535,979  | 8.31E-08 | 0.200  | 0.208  |  |  |  | <i>DCAF5</i>     | Body    |
| cg05813673 | 4  | 53,862,521  | 3.47E-07 | 0.200  | 0.198  |  |  |  | <i>SCFD2</i>     | Body    |
| cg18499083 | 14 | 91,637,035  | 0.000825 | 0.200  | 0.237  |  |  |  | <i>C14orf159</i> | Body    |
| cg21723861 | 17 | 39,686,628  | 7.98E-06 | 0.200  | 0.160  |  |  |  |                  |         |
| cg24382070 | 8  | 22,013,694  | 4.19E-08 | 0.200  | 0.179  |  |  |  | <i>LGI3</i>      | Body    |
| cg24841318 | 17 | 27,038,686  | 0.007586 | 0.200  | 0.192  |  |  |  | <i>PROCA1</i>    | 5'UTR   |
| cg26262055 | 4  | 25,090,618  | 0.001678 | 0.200  | 0.160  |  |  |  |                  |         |
| cg09764807 | 10 | 43,820,676  | 4E-09    | 0.200  | 0.200  |  |  |  |                  |         |
| cg12972064 | 3  | 171,887,393 | 9.69E-05 | 0.200  | 0.246  |  |  |  | <i>FNDC3B</i>    | Body    |
| cg13942922 | 2  | 238,383,665 | 0.000383 | 0.200  | 0.153  |  |  |  |                  |         |
| cg09950256 | 2  | 64,836,449  | 0.000224 | 0.200  | 0.219  |  |  |  |                  |         |
| cg14377922 | 2  | 23,840,537  | 3.27E-05 | 0.200  | 0.191  |  |  |  | <i>KLHL29</i>    | Body    |
| cg25109019 | 3  | 181,441,345 | 1.56E-05 | 0.200  | 0.190  |  |  |  | <i>SOX2OT</i>    | Body    |
| cg15289427 | 6  | 24,911,001  | 0.007506 | 0.200  | 0.144  |  |  |  | <i>FAM65B</i>    | 5'UTR   |
| cg16811108 | 17 | 7,905,840   | 5.4E-06  | 0.200  | 0.191  |  |  |  | <i>GUCY2D</i>    | TSS200  |
| cg23601468 | 22 | 33,200,307  | 0.002582 | 0.200  | 0.229  |  |  |  | <i>SYN3</i>      | Body    |
| cg25656762 | 5  | 60,927,728  | 2.26E-07 | 0.200  | 0.174  |  |  |  |                  |         |
| cg27314002 | 3  | 46,506,519  | 0.001432 | 0.200  | 0.166  |  |  |  | <i>LTF</i>       | TSS200  |
| cg11515095 | 11 | 132,949,437 | 0.014619 | -0.200 | -0.133 |  |  |  | <i>OPCML</i>     | Body    |
| cg18220087 | 11 | 134,783,448 | 0.002179 | -0.200 | -0.136 |  |  |  |                  |         |
| cg04558386 | 6  | 13,815,568  | 0.000299 | -0.200 | -0.257 |  |  |  | <i>CCDC90A</i>   | TSS1500 |
| cg05261272 | 6  | 137,494,924 | 0.000184 | -0.200 | -0.167 |  |  |  | <i>IL22RA2</i>   | TSS200  |
| cg14199090 | 1  | 65,990,564  | 0.001862 | -0.200 | -0.228 |  |  |  | <i>LEPR</i>      | 5'UTR   |
| cg20153240 | 1  | 2,016,789   | 2.71E-07 | -0.200 | -0.189 |  |  |  | <i>PRKCZ</i>     | Body    |

|            |    |             |          |        |        |  |  |                   |         |
|------------|----|-------------|----------|--------|--------|--|--|-------------------|---------|
| cg21760363 | 3  | 167,835,467 | 0.002459 | -0.200 | -0.143 |  |  |                   |         |
| cg09418852 | 15 | 46,636,037  | 0.002418 | -0.200 | -0.228 |  |  |                   |         |
| cg05611565 | 10 | 130,829,629 | 0.000299 | -0.200 | -0.167 |  |  |                   |         |
| cg15777553 | 12 | 34,493,996  | 0.002457 | -0.200 | -0.223 |  |  |                   |         |
| cg16292181 | 6  | 72,254,462  | 0.003076 | -0.200 | -0.116 |  |  |                   |         |
| cg20156165 | 1  | 118,322,537 | 0.027641 | -0.200 | -0.195 |  |  |                   |         |
| cg24156149 | 2  | 197,033,988 | 0.003658 | -0.200 | -0.195 |  |  | <i>STK17B</i>     | 5'UTR   |
| cg00816406 | 1  | 240,286,626 | 1.13E-05 | -0.200 | -0.199 |  |  | <i>FMN2</i>       | Body    |
| cg03994184 | 7  | 1,714,969   | 0.006378 | -0.200 | -0.147 |  |  |                   |         |
| cg12505085 | 10 | 75,913,585  | 7.46E-06 | -0.200 | -0.187 |  |  | <i>ADK</i>        | Body    |
| cg22942908 | 1  | 110,578,259 | 1.05E-05 | -0.200 | -0.153 |  |  | <i>FAM40A</i>     | Body    |
| cg23943272 | 17 | 45,851,891  | 0.004817 | -0.200 | -0.139 |  |  |                   |         |
| cg04518304 | 14 | 76,600,760  | 0.004312 | -0.200 | -0.158 |  |  |                   |         |
| cg25741597 | 3  | 147,722,622 | 3.95E-08 | -0.200 | -0.205 |  |  |                   |         |
| cg02958014 | 12 | 127,206,602 | 0.019358 | -0.200 | -0.216 |  |  |                   |         |
| cg03033543 | 20 | 31,870,884  | 0.000669 | -0.200 | -0.188 |  |  | <i>C20orf114</i>  | TSS200  |
| cg08973950 | 7  | 1,083,309   | 2.8E-06  | -0.200 | -0.199 |  |  | <i>C7orf50</i>    | Body    |
| cg18092977 | 14 | 101,190,167 | 0.023146 | -0.200 | -0.147 |  |  |                   |         |
| cg18280251 | 7  | 48,237,515  | 0.029214 | -0.200 | -0.141 |  |  | <i>ABCA13</i>     | Body    |
| cg05068636 | 15 | 44,887,664  | 4.27E-06 | -0.200 | -0.175 |  |  | <i>SPG11</i>      | Body    |
| cg13921444 | 4  | 186,733,024 | 5.02E-09 | -0.200 | -0.199 |  |  | <i>SORBS2</i>     | 5'UTR   |
| cg16010911 | 17 | 72,581,014  | 0.000715 | -0.200 | -0.249 |  |  | <i>C17orf77</i>   | TSS200  |
| cg16309727 | 8  | 117,963,055 | 2.74E-06 | -0.200 | -0.209 |  |  |                   |         |
| cg23561148 | 18 | 33,688,575  | 1.28E-06 | -0.200 | -0.180 |  |  | <i>SLC39A6</i>    | 3'UTR   |
| cg13635710 | 13 | 56,216,872  | 0.003766 | -0.200 | -0.133 |  |  |                   |         |
| cg27377632 | 19 | 677,895     | 8.61E-08 | -0.200 | -0.171 |  |  | <i>FSTL3</i>      | Body    |
| cg00615010 | X  | 103,809,062 | 0.019388 | -0.200 | -0.183 |  |  |                   |         |
| cg02148324 | 7  | 150,925,493 | 3.39E-12 | -0.200 | -0.175 |  |  | <i>ABCF2</i>      | TSS1500 |
| cg03540912 | 16 | 71,792,711  | 0.001669 | -0.200 | -0.175 |  |  | <i>SNORD71</i>    | TSS1500 |
| cg19787650 | 8  | 130,998,171 | 4.04E-06 | -0.200 | -0.220 |  |  |                   |         |
| cg10236631 | 14 | 36,899,948  | 0.032257 | -0.200 | -0.059 |  |  |                   |         |
| cg20206277 | 21 | 43,098,901  | 6.05E-06 | -0.200 | -0.196 |  |  | <i>NCRNA00111</i> | TSS1500 |
| cg03878567 | 6  | 70,952,001  | 5.64E-06 | -0.200 | -0.197 |  |  | <i>COL9A1</i>     | Body    |
| cg10948284 | 8  | 143,882,645 | 0.027279 | -0.200 | -0.080 |  |  |                   |         |

|            |    |             |          |        |        |           |        |  |           |         |
|------------|----|-------------|----------|--------|--------|-----------|--------|--|-----------|---------|
| cg27075917 | 17 | 38,596,324  | 6.64E-06 | -0.200 | -0.190 |           |        |  |           |         |
| cg21474062 | 3  | 141,087,363 | 9.7E-07  | -0.200 | -0.180 |           |        |  | ZBTB38    | 5'UTR   |
| cg00092443 | 20 | 46,578,370  | 0.011825 | -0.200 | -0.168 |           |        |  |           |         |
| cg04231636 | 6  | 18,186,411  | 9.36E-08 | -0.200 | -0.184 |           |        |  | KDM1B     | Body    |
| cg10887810 | 1  | 119,442,124 | 1.97E-07 | -0.200 | -0.188 |           |        |  | TBX15     | Body    |
| cg20287514 | 1  | 25,869,837  | 0.000303 | -0.200 | -0.167 |           |        |  | LDLRAP1   | TSS1500 |
| cg11830876 | 17 | 78,006,238  | 0.000483 | -0.200 | -0.168 |           |        |  | TBC1D16   | 5'UTR   |
| cg15646123 | 6  | 20,954,499  | 0.00051  | -0.200 | -0.152 |           |        |  | CDKAL1    | Body    |
| cg04225760 | 14 | 96,152,464  | 0.028178 | -0.200 | -0.048 |           |        |  | TCL1B     | TSS1500 |
| cg23091067 | X  | 118,104,340 | 0.003457 | -0.200 | -0.158 |           |        |  |           |         |
| cg17738861 | 5  | 32,233,621  | 4.76E-06 | -0.200 | -0.174 |           |        |  | MTMR12    | Body    |
| cg18789624 | 7  | 30,516,742  | 3.47E-05 | -0.200 | -0.210 |           |        |  | NOD1      | 5'UTR   |
| cg09857577 | 7  | 50,136,102  | 7.74E-05 | -0.200 | -0.176 |           |        |  | C7orf72   | 1stExon |
| cg05733285 | 20 | 44,168,184  | 0.000734 | -0.200 | -0.229 |           |        |  | WFDC6     | TSS200  |
| cg06970472 | 4  | 40,910,981  | 3.29E-07 | -0.200 | -0.139 |           |        |  | APBB2     | Body    |
| cg08217234 | 19 | 4,042,688   | 3.22E-08 | -0.200 | -0.193 |           |        |  |           |         |
| cg16016034 | 1  | 205,579,533 | 3.73E-08 | -0.200 | -0.203 |           |        |  |           |         |
| cg15959080 | 3  | 13,939,366  | 0.029894 | -0.200 | -0.097 |           |        |  |           |         |
| cg03503295 | 5  | 13,944,491  | 0.000526 | -0.200 | -0.207 | 0.0105252 | -0.059 |  | DNAH5     | 1stExon |
| cg03741458 | 2  | 200,468,445 | 0.020822 | -0.200 | -0.189 |           |        |  |           |         |
| cg04431935 | 16 | 1,413,516   | 1.44E-06 | -0.200 | -0.202 |           |        |  | UNKL      | 3'UTR   |
| cg07652628 | 12 | 53,343,514  | 1.75E-07 | -0.200 | -0.198 |           |        |  | KRT18     | Body    |
| cg02468966 | 20 | 56,287,198  | 0.005115 | -0.201 | -0.218 |           |        |  | PMEPA1    | TSS1500 |
| cg03840511 | 15 | 64,649,139  | 0.001242 | -0.201 | -0.203 |           |        |  | CSNK1G1   | TSS1500 |
| cg12113251 | 12 | 58,176,230  | 0.003784 | -0.201 | -0.130 |           |        |  | FAM119B   | 3'UTR   |
| cg24720672 | 15 | 57,599,126  | 8.26E-10 | -0.201 | -0.215 |           |        |  | LOC283663 | Body    |
| cg08719289 | 1  | 41,328,378  | 3.83E-13 | -0.201 | -0.198 |           |        |  | CITED4    | TSS1500 |
| cg11042505 | 2  | 15,950,244  | 0.00045  | -0.201 | -0.175 |           |        |  |           |         |
| cg15013761 | 17 | 25,982,249  | 1.61E-05 | -0.201 | -0.128 |           |        |  |           |         |
| cg21691717 | 1  | 153,321,907 | 0.009216 | -0.201 | -0.193 |           |        |  | PGLYRP4   | TSS1500 |
| cg13578134 | 15 | 75,081,572  | 9.84E-05 | -0.201 | -0.227 |           |        |  | CSK       | 5'UTR   |
| cg01635303 | 12 | 34,511,504  | 0.007773 | -0.201 | -0.203 |           |        |  |           |         |
| cg22603037 | 1  | 152,087,267 | 0.000576 | -0.201 | -0.167 |           |        |  | TCHH      | TSS1500 |
| cg03109316 | 3  | 113,957,903 | 0.038008 | -0.201 | -0.179 | 1.7E-08   | -0.146 |  | ZNF80     | TSS1500 |

|            |    |             |          |        |        |            |        |     |                  |         |
|------------|----|-------------|----------|--------|--------|------------|--------|-----|------------------|---------|
| cg11936341 | 6  | 1,604,140   | 2.74E-05 | -0.201 | -0.198 |            |        |     |                  |         |
| cg02938964 | 17 | 17,120,279  | 0.011392 | -0.201 | -0.108 |            |        |     | <i>FLCN</i>      | Body    |
| cg04522792 | 8  | 122,543,204 | 9.32E-06 | -0.201 | -0.207 |            |        |     |                  |         |
| cg03726785 | 20 | 1,532,543   | 0.049867 | -0.201 | -0.120 |            |        |     | <i>SIRPD</i>     | Body    |
| cg19741359 | 2  | 73,429,176  | 0.037805 | -0.201 | -0.168 |            |        |     | <i>NOTO</i>      | TSS1500 |
| cg04019148 | 13 | 56,226,793  | 0.002035 | -0.201 | -0.154 |            |        |     |                  |         |
| cg06777202 | 13 | 65,532,878  | 0.040705 | -0.201 | -0.154 |            |        |     |                  |         |
| cg22738289 | 10 | 42,859,004  | 0.041339 | -0.201 | -0.167 |            |        |     | <i>LOC441666</i> | Body    |
| cg22405653 | 21 | 32,128,800  | 0.006858 | -0.201 | -0.168 |            |        |     | <i>KRTAP21-1</i> | TSS1500 |
| cg02657245 | 16 | 5,976,578   | 0.019504 | -0.201 | -0.128 |            |        |     |                  |         |
| cg07478467 | 8  | 91,712,588  | 0.005339 | -0.201 | -0.219 |            |        |     |                  |         |
| cg16899306 | 6  | 32,732,585  | 0.022882 | -0.201 | -0.113 | 0.01193822 | -0.090 | Yes | <i>HLA-DQB2</i>  | TSS1500 |
| cg05224524 | 4  | 176,924,985 | 0.000681 | -0.201 | -0.140 |            |        |     | <i>GPM6A</i>     | TSS1500 |
| cg18146398 | 3  | 46,251,215  | 4.51E-07 | -0.201 | -0.182 |            |        |     | <i>CCR1</i>      | TSS1500 |
| cg02120470 | 1  | 67,267,129  | 7.28E-05 | -0.201 | -0.187 |            |        |     | <i>INSL5</i>     | TSS200  |
| cg06631531 | 4  | 5,382,335   | 0.03841  | -0.201 | -0.088 |            |        |     | <i>STK32B</i>    | Body    |
| cg10262744 | 3  | 12,599,968  | 7.65E-06 | -0.201 | -0.212 |            |        |     | <i>MKRN2</i>     | Body    |
| cg16148956 | 8  | 54,140,771  | 8.02E-06 | -0.201 | -0.223 |            |        |     | <i>OPRK1</i>     | 3'UTR   |
| cg24586528 | 13 | 58,299,073  | 0.000621 | -0.201 | -0.125 |            |        |     | <i>PCDH17</i>    | Body    |
| cg04239798 | 1  | 159,236,068 | 0.016047 | -0.201 | -0.127 |            |        |     |                  |         |
| cg06817539 | 4  | 166,131,638 | 0.000467 | -0.201 | -0.187 |            |        |     | <i>KLHL2</i>     | Body    |
| cg17334970 | 6  | 33,218,094  | 1.2E-07  | -0.201 | -0.207 |            |        |     | <i>VPS52</i>     | 3'UTR   |
| cg04010817 | 16 | 62,273,362  | 0.032705 | -0.201 | -0.056 |            |        |     |                  |         |
| cg07813628 | 2  | 88,587,857  | 0.000505 | -0.201 | -0.138 |            |        |     |                  |         |
| cg20490031 | 18 | 61,143,926  | 0.003268 | -0.201 | -0.168 |            |        |     | <i>SERPINB5</i>  | TSS1500 |
| cg00500626 | 1  | 5,544,470   | 0.035045 | -0.201 | -0.082 |            |        |     |                  |         |
| cg04023526 | 11 | 76,371,932  | 5.56E-08 | -0.201 | -0.176 |            |        |     | <i>LRR32</i>     | Body    |
| cg08572278 | 4  | 62,467,955  | 0.040257 | -0.201 | -0.105 |            |        |     | <i>LPHN3</i>     | Body    |
| cg21013206 | 11 | 113,347,208 | 0.004148 | -0.201 | -0.208 |            |        |     | <i>DRD2</i>      | TSS1500 |
| cg05587926 | 11 | 122,387,899 | 0.012507 | -0.201 | -0.200 |            |        |     |                  |         |
| cg20479063 | 4  | 10,016,908  | 1.42E-07 | -0.201 | -0.194 |            |        |     | <i>SLC2A9</i>    | Body    |
| cg01477861 | 4  | 77,609,841  | 0.000995 | -0.201 | -0.229 |            |        |     | <i>SHROOM3</i>   | Body    |
| cg23822644 | 7  | 27,777,487  | 0.002944 | -0.201 | -0.219 |            |        |     |                  |         |
| cg25191332 | 7  | 112,062,419 | 0.000185 | -0.201 | -0.173 |            |        |     | <i>IFRD1</i>     | TSS1500 |

|            |    |             |          |        |        |  |  |  |                  |         |
|------------|----|-------------|----------|--------|--------|--|--|--|------------------|---------|
| cg10115203 | 1  | 7,121,245   | 0.029512 | -0.201 | -0.332 |  |  |  | <i>CAMTA1</i>    | Body    |
| cg24532610 | 12 | 48,961,603  | 0.043969 | -0.201 | -0.119 |  |  |  | <i>LALBA</i>     | 3'UTR   |
| cg00331032 | 22 | 38,339,972  | 0.001813 | -0.201 | -0.279 |  |  |  | <i>C22orf23</i>  | 3'UTR   |
| cg02981092 | 3  | 57,543,499  | 1.57E-09 | -0.201 | -0.201 |  |  |  | <i>PDE12</i>     | Body    |
| cg17658568 | 11 | 122,033,987 | 0.018087 | -0.201 | -0.168 |  |  |  | <i>LOC399959</i> | Body    |
| cg18405691 | 11 | 55,322,753  | 0.018364 | -0.201 | -0.206 |  |  |  | <i>OR4C15</i>    | 1stExon |
| cg25143359 | 1  | 245,533,949 | 0.03397  | -0.201 | -0.107 |  |  |  | <i>KIF26B</i>    | Body    |
| cg21770322 | 7  | 97,807,741  | 9.89E-05 | -0.201 | -0.190 |  |  |  | <i>LMTK2</i>     | Body    |
| cg04572540 | 6  | 30,908,739  | 0.008472 | -0.201 | -0.059 |  |  |  | <i>DPCR1</i>     | TSS200  |
| cg11201447 | 8  | 128,808,063 | 1.62E-05 | -0.201 | -0.185 |  |  |  | <i>MIR1204</i>   | TSS200  |
| cg16204420 | 5  | 44,332,757  | 1.01E-09 | -0.201 | -0.194 |  |  |  | <i>FGF10</i>     | Body    |
| cg09241295 | 3  | 192,560,263 | 0.015668 | -0.201 | -0.153 |  |  |  | <i>C3orf59</i>   | Body    |
| cg14978994 | 1  | 1,978,115   | 1.14E-11 | -0.201 | -0.166 |  |  |  |                  |         |
| cg15997518 | 1  | 81,814,874  | 1.07E-08 | -0.201 | -0.195 |  |  |  |                  |         |
| cg19403586 | 8  | 80,938,785  | 5.1E-06  | -0.201 | -0.161 |  |  |  | <i>MRPS28</i>    | Body    |
| cg27365103 | 20 | 1,578,550   | 0.01027  | -0.201 | -0.169 |  |  |  | <i>SIRPB1</i>    | Body    |
| cg04511463 | 11 | 43,589,582  | 0.037474 | -0.201 | -0.125 |  |  |  |                  |         |
| cg04577162 | 7  | 73,667,397  | 0.008933 | -0.201 | -0.089 |  |  |  | <i>RFC2</i>      | Body    |
| cg03609034 | 7  | 101,680,927 | 0.002077 | -0.201 | -0.164 |  |  |  | <i>CUX1</i>      | Body    |
| cg04267605 | 4  | 52,859,928  | 0.003029 | -0.201 | -0.233 |  |  |  | <i>LRRC66</i>    | 3'UTR   |
| cg11580026 | 3  | 44,730,244  | 1.26E-08 | -0.201 | -0.193 |  |  |  |                  |         |
| cg11441533 | 12 | 64,295,363  | 0.00358  | -0.201 | -0.119 |  |  |  | <i>SRGAP1</i>    | Body    |
| cg25814149 | 6  | 169,420,648 | 7.9E-05  | -0.201 | -0.126 |  |  |  |                  |         |
| cg19928703 | 13 | 30,143,971  | 7.23E-06 | -0.201 | -0.194 |  |  |  | <i>SLC7A1</i>    | 5'UTR   |
| cg20079335 | X  | 151,883,293 | 0.007296 | -0.201 | -0.148 |  |  |  | <i>MAGEA2</i>    | 5'UTR   |
| cg05088605 | 17 | 79,987,813  | 0.006409 | -0.201 | -0.131 |  |  |  | <i>LRRC45</i>    | Body    |
| cg14643415 | 3  | 167,293,056 | 0.048801 | -0.201 | -0.130 |  |  |  | <i>WDR49</i>     | Body    |
| cg23764008 | 11 | 61,344,823  | 0.00208  | -0.201 | -0.164 |  |  |  | <i>SYT7</i>      | Body    |
| cg14327359 | 2  | 47,419,263  | 5.21E-11 | -0.201 | -0.196 |  |  |  |                  |         |
| cg02082650 | X  | 25,022,003  | 4.23E-08 | -0.201 | -0.192 |  |  |  | <i>ARX</i>       | 3'UTR   |
| cg02490626 | 2  | 234,653,891 | 0.023613 | -0.201 | -0.201 |  |  |  | <i>UGT1A10</i>   | Body    |
| cg03531326 | 19 | 39,443,344  | 2.56E-09 | -0.201 | -0.202 |  |  |  | <i>FBXO17</i>    | 5'UTR   |
| cg05683808 | 7  | 157,133,186 | 2.74E-07 | -0.201 | -0.190 |  |  |  | <i>DNAJB6</i>    | 5'UTR   |
| cg08250055 | 6  | 32,052,736  | 0.033472 | -0.201 | -0.043 |  |  |  | <i>TNXB</i>      | Body    |

|            |    |             |          |        |        |           |        |  |                  |         |
|------------|----|-------------|----------|--------|--------|-----------|--------|--|------------------|---------|
| cg14255981 | 12 | 105,414,154 | 4.95E-05 | -0.201 | -0.211 |           |        |  | <i>ALDH1L2</i>   | Body    |
| cg18566313 | 4  | 186,733,428 | 9.18E-10 | -0.201 | -0.197 |           |        |  | <i>SORBS2</i>    | TSS200  |
| cg08844169 | 3  | 119,180,915 | 0.001125 | -0.201 | -0.168 |           |        |  | <i>TMEM39A</i>   | Body    |
| cg18552413 | 1  | 159,174,610 | 0.001926 | -0.201 | -0.215 | 7.78E-23  | -0.161 |  | <i>DARC</i>      | TSS1500 |
| cg20667778 | 15 | 53,943,590  | 0.033348 | -0.201 | -0.146 |           |        |  | <i>WDR72</i>     | Body    |
| cg20668718 | 5  | 146,991,927 | 0.000145 | -0.201 | -0.239 |           |        |  | <i>JAKMIP2</i>   | Body    |
| cg01919999 | 5  | 180,668,568 | 2.37E-08 | -0.201 | -0.171 |           |        |  | <i>GNB2L1</i>    | Body    |
| cg06884352 | 8  | 122,808,923 | 1.13E-05 | -0.201 | -0.228 |           |        |  |                  |         |
| cg19313311 | 7  | 74,058,031  | 7.1E-12  | -0.201 | -0.223 |           |        |  |                  |         |
| cg24711070 | 11 | 118,842,126 | 0.022482 | -0.201 | -0.064 |           |        |  | <i>FOXR1</i>     | TSS1500 |
| cg11506843 | 8  | 7,153,933   | 0.005946 | -0.201 | -0.222 |           |        |  | <i>FAM90A20</i>  | Body    |
| cg13353152 | 1  | 158,465,963 | 7.01E-07 | -0.201 | -0.208 |           |        |  |                  |         |
| cg10071848 | 14 | 74,770,110  | 0.000002 | -0.201 | -0.172 |           |        |  | <i>ABCD4</i>     | TSS1500 |
| cg16471362 | 20 | 44,170,643  | 0.043162 | -0.201 | -0.081 |           |        |  | <i>SPINLW1</i>   | 3'UTR   |
| cg14972228 | 19 | 38,570,495  | 0.003283 | -0.201 | -0.217 |           |        |  | <i>SIPA1L3</i>   | 5'UTR   |
| cg00033703 | 15 | 63,566,255  | 3.53E-05 | -0.201 | -0.207 |           |        |  |                  |         |
| cg18115481 | 14 | 106,173,722 | 0.013894 | -0.201 | -0.108 |           |        |  |                  |         |
| cg11358713 | 7  | 41,188,092  | 7.86E-05 | -0.201 | -0.171 |           |        |  |                  |         |
| cg21211039 | 22 | 45,555,611  | 7.14E-09 | -0.201 | -0.184 |           |        |  |                  |         |
| cg22636631 | 5  | 79,334,767  | 5.1E-07  | -0.201 | -0.173 |           |        |  | <i>THBS4</i>     | Body    |
| cg13425422 | 2  | 167,168,604 | 0.035504 | -0.201 | -0.103 |           |        |  | <i>SCN9A</i>     | 5'UTR   |
| cg21977507 | 17 | 12,145,856  | 3.77E-08 | -0.201 | -0.194 |           |        |  |                  |         |
| cg14619949 | 5  | 76,116,169  | 0.016368 | -0.201 | -0.199 |           |        |  | <i>F2RL1</i>     | Body    |
| cg21188409 | 3  | 180,466,040 | 2.12E-08 | -0.201 | -0.189 |           |        |  |                  |         |
| cg18195238 | 8  | 64,681,840  | 0.035999 | -0.201 | -0.141 |           |        |  |                  |         |
| cg22008551 | 19 | 46,452,989  | 5.17E-07 | -0.201 | -0.180 |           |        |  | <i>NOVA2</i>     | Body    |
| cg00230837 | 5  | 9,714,909   | 0.032557 | -0.201 | -0.105 |           |        |  | <i>LOC285692</i> | Body    |
| cg02297967 | 8  | 57,473,034  | 0.00093  | -0.201 | -0.228 |           |        |  |                  |         |
| cg09514545 | 19 | 54,200,652  | 3.08E-08 | -0.201 | -0.185 |           |        |  | <i>MIR525</i>    | TSS200  |
| cg03964208 | 10 | 132,461,229 | 0.015167 | -0.201 | -0.093 |           |        |  |                  |         |
| cg08791424 | 2  | 208,795,653 | 6.95E-06 | -0.201 | -0.199 |           |        |  | <i>PLEKHM3</i>   | Body    |
| cg12132396 | 14 | 26,676,915  | 0.026779 | -0.201 | -0.095 |           |        |  |                  |         |
| cg20131968 | 17 | 61,850,012  | 7.74E-11 | -0.202 | -0.194 | 0.0000896 | -0.061 |  | <i>CCDC47</i>    | 5'UTR   |
| cg24032710 | 14 | 104,770,459 | 0.01468  | -0.202 | -0.147 |           |        |  |                  |         |

|             |    |             |          |        |        |          |        |  |          |         |
|-------------|----|-------------|----------|--------|--------|----------|--------|--|----------|---------|
| cg27605977  | 5  | 152,309,662 | 0.027726 | -0.202 | -0.190 |          |        |  |          |         |
| cg14640670  | 5  | 139,494,937 | 6.05E-17 | -0.202 | -0.192 |          |        |  | PURA     | 3'UTR   |
| cg13470969  | 1  | 152,490,870 | 0.038581 | -0.202 | -0.216 |          |        |  |          |         |
| cg19373760  | 1  | 247,679,988 | 1.7E-07  | -0.202 | -0.183 |          |        |  |          |         |
| cg24464789  | 1  | 43,751,497  | 2.91E-05 | -0.202 | -0.209 |          |        |  | C1orf210 | TSS1500 |
| cg17346176  | 6  | 119,239,700 | 2.02E-05 | -0.202 | -0.182 |          |        |  | MCM9     | Body    |
| cg23873288  | 6  | 35,705,851  | 2.84E-08 | -0.202 | -0.194 |          |        |  | C6orf81  | Body    |
| cg27468419  | 8  | 57,309,109  | 0.041773 | -0.202 | -0.305 |          |        |  | SDR16C6  | TSS1500 |
| cg00554948  | 12 | 51,631,858  | 5.85E-05 | -0.202 | -0.183 |          |        |  | DAZAP2   | TSS1500 |
| cg07347148  | 1  | 167,786,802 | 0.001432 | -0.202 | -0.254 |          |        |  | ADCY10   | Body    |
| cg14620221  | 11 | 124,310,939 | 0.022407 | -0.202 | -0.164 | 1.61E-07 | -0.109 |  | OR8B8    | 1stExon |
| cg16509592  | 2  | 106,120,415 | 0.001796 | -0.202 | -0.135 |          |        |  |          |         |
| cg17095929  | 11 | 64,883,911  | 7.28E-09 | -0.202 | -0.192 |          |        |  | ZNHIT2   | 1stExon |
| cg17806482  | 7  | 107,608,007 | 2.7E-05  | -0.202 | -0.192 |          |        |  | LAMB1    | Body    |
| cg131110574 | 21 | 46,493,169  | 0.00226  | -0.202 | -0.166 |          |        |  | ADARB1   | TSS1500 |
| cg18532070  | 7  | 41,940,672  | 0.021164 | -0.202 | -0.153 |          |        |  |          |         |
| cg25987408  | 5  | 154,318,104 | 4.7E-06  | -0.202 | -0.191 |          |        |  | GEMIN5   | TSS1500 |
| cg14059959  | 13 | 111,144,447 | 0.002265 | -0.202 | -0.141 |          |        |  | COL4A2   | Body    |
| cg11179610  | 15 | 95,588,018  | 0.001963 | -0.202 | -0.139 |          |        |  |          |         |
| cg07648740  | 7  | 154,864,630 | 0.00141  | -0.202 | -0.206 |          |        |  | HTR5A    | Body    |
| cg05415308  | 15 | 71,406,783  | 9.45E-08 | -0.202 | -0.203 |          |        |  | CT62     | 5'UTR   |
| cg05941106  | 11 | 123,248,842 | 0.022931 | -0.202 | -0.153 |          |        |  |          |         |
| cg08422172  | 16 | 11,886,668  | 1.86E-07 | -0.202 | -0.196 |          |        |  |          |         |
| cg10610428  | 12 | 5,884,295   | 0.031153 | -0.202 | -0.198 |          |        |  | ANO2     | Body    |
| cg16900910  | 15 | 72,789,182  | 3.49E-05 | -0.202 | -0.187 |          |        |  | ARIH1    | Body    |
| cg13049624  | 3  | 1,050,278   | 1.2E-06  | -0.202 | -0.182 |          |        |  |          |         |
| cg15472885  | 3  | 71,056,608  | 2.09E-06 | -0.202 | -0.227 |          |        |  | FOXP1    | Body    |
| cg15167841  | 11 | 71,787,492  | 6.78E-05 | -0.202 | -0.193 |          |        |  | NUMA1    | 5'UTR   |
| cg22203607  | 5  | 180,536,151 | 0.028897 | -0.202 | -0.071 |          |        |  |          |         |
| cg12751948  | 10 | 133,794,454 | 4.53E-09 | -0.202 | -0.181 |          |        |  | BNIP3    | Body    |
| cg20621674  | 13 | 56,188,634  | 2.2E-05  | -0.202 | -0.165 |          |        |  |          |         |
| cg26339974  | 1  | 153,230,907 | 0.019507 | -0.202 | -0.168 |          |        |  | LOR      | TSS1500 |
| cg18397975  | 5  | 33,997,484  | 0.019733 | -0.202 | -0.170 |          |        |  | AMACR    | Body    |
| cg10517650  | 3  | 113,235,015 | 4.93E-06 | -0.202 | -0.173 |          |        |  | CCDC52   | TSS1500 |



|            |    |             |          |        |        |  |  |  |                 |         |
|------------|----|-------------|----------|--------|--------|--|--|--|-----------------|---------|
| cg23067085 | 3  | 71,180,032  | 8.13E-45 | -0.202 | -0.194 |  |  |  | <i>FOXP1</i>    | Body    |
| cg21070527 | 7  | 63,558,196  | 0.000352 | -0.202 | -0.139 |  |  |  |                 |         |
| cg23024102 | 13 | 45,149,706  | 9.05E-07 | -0.202 | -0.211 |  |  |  | <i>TSC22D1</i>  | 1stExon |
| cg06275134 | X  | 140,335,783 | 0.012669 | -0.202 | -0.181 |  |  |  | <i>SPANXC</i>   | Body    |
| cg26773183 | X  | 108,616,697 | 0.022068 | -0.202 | -0.279 |  |  |  | <i>GUCY2F</i>   | 3'UTR   |
| cg02265105 | 5  | 83,268,490  | 1.27E-06 | -0.202 | -0.196 |  |  |  | <i>EDIL3</i>    | Body    |
| cg07029777 | 2  | 1,658,233   | 2.91E-05 | -0.202 | -0.169 |  |  |  | <i>PXDN</i>     | Body    |
| cg09044174 | 20 | 60,308,212  | 0.002231 | -0.202 | -0.124 |  |  |  | <i>CDH4</i>     | Body    |
| cg20570016 | 1  | 156,261,298 | 4.77E-08 | -0.202 | -0.192 |  |  |  | <i>TMEM79</i>   | Body    |
| cg05729745 | 22 | 49,937,644  | 0.000182 | -0.202 | -0.155 |  |  |  |                 |         |
| cg05854698 | 10 | 134,910,850 | 0.037441 | -0.202 | -0.155 |  |  |  | <i>GPR123</i>   | Body    |
| cg14565752 | 19 | 47,955,003  | 0.031318 | -0.202 | -0.185 |  |  |  | <i>SLC8A2</i>   | Body    |
| cg15625631 | 11 | 123,814,972 | 0.000303 | -0.202 | -0.153 |  |  |  | <i>OR6T1</i>    | TSS1500 |
| cg22838882 | 3  | 138,952,118 | 1.52E-05 | -0.202 | -0.247 |  |  |  | <i>PISRT1</i>   | Body    |
| cg05343159 | 10 | 129,347,529 | 0.009123 | -0.202 | -0.165 |  |  |  | <i>NPS</i>      | TSS200  |
| cg11239749 | 6  | 32,781,307  | 0.03113  | -0.202 | -0.128 |  |  |  | <i>HLA-DOB</i>  | Body    |
| cg02552189 | 2  | 223,891,284 | 0.000127 | -0.202 | -0.201 |  |  |  |                 |         |
| cg11988476 | 21 | 46,368,090  | 0.043965 | -0.202 | -0.124 |  |  |  | <i>C21orf70</i> | Body    |
| cg19959621 | 22 | 37,179,912  | 0.010824 | -0.202 | -0.149 |  |  |  |                 |         |
| cg11770920 | 2  | 218,465,695 | 0.037225 | -0.202 | -0.144 |  |  |  | <i>DIRC3</i>    | Body    |
| cg24443446 | 10 | 65,647,572  | 4.33E-05 | -0.202 | -0.188 |  |  |  |                 |         |
| cg03065888 | 8  | 145,148,823 | 1.33E-06 | -0.202 | -0.148 |  |  |  | <i>CYC1</i>     | TSS1500 |
| cg02822963 | 3  | 149,470,953 | 1.69E-09 | -0.202 | -0.224 |  |  |  | <i>COMMD2</i>   | TSS1500 |
| cg14074970 | 18 | 19,932,132  | 0.04098  | -0.202 | -0.181 |  |  |  |                 |         |
| cg18719016 | 10 | 125,558,960 | 0.004293 | -0.202 | -0.128 |  |  |  | <i>CPXM2</i>    | Body    |
| cg12705541 | X  | 75,245,844  | 0.04504  | -0.202 | -0.186 |  |  |  |                 |         |
| cg25214823 | 13 | 41,626,718  | 0.000542 | -0.202 | -0.210 |  |  |  |                 |         |
| cg00217306 | 3  | 141,681,567 | 2.18E-09 | -0.202 | -0.172 |  |  |  | <i>TFDP2</i>    | Body    |
| cg03262887 | 20 | 29,978,114  | 3.49E-16 | -0.202 | -0.197 |  |  |  | <i>DEFB119</i>  | Body    |
| cg14286140 | 9  | 93,279,614  | 5.16E-20 | -0.202 | -0.188 |  |  |  |                 |         |
| cg07440648 | 4  | 23,236,618  | 0.008247 | -0.202 | -0.115 |  |  |  |                 |         |
| cg09206878 | 15 | 25,165,585  | 0.001689 | -0.202 | -0.174 |  |  |  | <i>SNRPN</i>    | 5'UTR   |
| cg07431888 | 16 | 8,813,274   | 1.97E-06 | -0.202 | -0.196 |  |  |  | <i>ABAT</i>     | 5'UTR   |
| cg25850629 | 1  | 33,210,830  | 4.04E-05 | -0.202 | -0.185 |  |  |  | <i>KIAA1522</i> | Body    |

|            |    |             |          |        |        |            |        |  |                  |         |
|------------|----|-------------|----------|--------|--------|------------|--------|--|------------------|---------|
| cg04813697 | 10 | 22,920,025  | 2.03E-05 | -0.202 | -0.182 |            |        |  | <i>PIP4K2A</i>   | Body    |
| cg01325188 | 16 | 88,050,684  | 0.000331 | -0.202 | -0.206 |            |        |  | <i>BANP</i>      | Body    |
| cg13984173 | 15 | 40,674,438  | 1.73E-07 | -0.202 | -0.191 |            |        |  | <i>C15orf23</i>  | TSS1500 |
| cg17839216 | 5  | 18,504,434  | 0.005897 | -0.202 | -0.149 |            |        |  |                  |         |
| cg00356981 | 13 | 112,804,728 | 0.008105 | -0.202 | -0.229 |            |        |  |                  |         |
| cg02186141 | 17 | 80,864,562  | 0.012765 | -0.202 | -0.171 |            |        |  | <i>TBCD</i>      | Body    |
| cg04441453 | 5  | 41,902,083  | 0.001088 | -0.202 | -0.178 |            |        |  |                  |         |
| cg20975733 | 15 | 87,155,056  | 4.94E-06 | -0.202 | -0.198 |            |        |  | <i>AGBL1</i>     | Body    |
| cg03228407 | 17 | 5,392,363   | 0.000963 | -0.202 | -0.163 |            |        |  | <i>MIS12</i>     | Body    |
| cg03812562 | 4  | 190,597,513 | 0.004022 | -0.202 | -0.161 |            |        |  |                  |         |
| cg24411946 | 10 | 52,645,408  | 0.000565 | -0.202 | -0.196 |            |        |  | <i>A1CF</i>      | 5'UTR   |
| cg15507486 | 19 | 46,627,896  | 0.039569 | -0.202 | -0.160 |            |        |  | <i>IGFL3</i>     | 1stExon |
| cg23931819 | 1  | 1,245,076   | 5.54E-08 | -0.202 | -0.148 |            |        |  | <i>PUSL1</i>     | Body    |
| cg06696292 | 8  | 23,536,779  | 0.003755 | -0.202 | -0.171 |            |        |  | <i>NKX3-1</i>    | 3'UTR   |
| cg22568403 | 5  | 169,758,055 | 2.83E-06 | -0.202 | -0.180 |            |        |  | <i>LOC257358</i> | TSS1500 |
| cg19478478 | 6  | 123,957,927 | 0.003362 | -0.202 | -0.137 | 0.00000109 | -0.137 |  | <i>TRDN</i>      | 1stExon |
| cg22104371 | 7  | 1,787,371   | 0.001435 | -0.202 | -0.163 |            |        |  | <i>ELFN1</i>     | 3'UTR   |
| cg25009896 | 17 | 21,904,695  | 0.003968 | -0.202 | -0.154 |            |        |  | <i>FLJ36000</i>  | Body    |
| cg20249071 | 11 | 122,684,258 | 0.026414 | -0.202 | -0.094 |            |        |  | <i>UBASH3B</i>   | 3'UTR   |
| cg21765032 | 19 | 3,293,547   | 0.00354  | -0.202 | -0.185 |            |        |  | <i>BRUNOL5</i>   | 3'UTR   |
| cg04900872 | 2  | 31,803,536  | 5.69E-10 | -0.202 | -0.212 |            |        |  | <i>SRD5A2</i>    | Body    |
| cg12798194 | 17 | 43,462,791  | 0.006633 | -0.202 | -0.109 |            |        |  |                  |         |
| cg23844115 | 6  | 10,434,871  | 6.07E-05 | -0.202 | -0.153 |            |        |  | <i>C6orf218</i>  | Body    |
| cg16463044 | 17 | 3,956,989   | 0.004313 | -0.202 | -0.185 |            |        |  | <i>ZZEF1</i>     | Body    |
| cg11881735 | 12 | 30,945,390  | 0.001399 | -0.202 | -0.152 |            |        |  |                  |         |
| cg16627193 | 7  | 157,801,404 | 0.002579 | -0.202 | -0.239 |            |        |  | <i>PTPRN2</i>    | Body    |
| cg23565607 | 17 | 80,395,310  | 0.000157 | -0.202 | -0.147 |            |        |  | <i>HEXDC</i>     | Body    |
| cg26076724 | 6  | 15,090,163  | 3.09E-06 | -0.202 | -0.183 |            |        |  |                  |         |
| cg05512061 | 6  | 100,042,195 | 0.001855 | -0.202 | -0.120 |            |        |  |                  |         |
| cg08096854 | 17 | 48,617,637  | 0.002503 | -0.202 | -0.178 |            |        |  | <i>EPN3</i>      | Body    |
| cg21613620 | 13 | 97,927,242  | 1.19E-05 | -0.202 | -0.154 |            |        |  | <i>MBNL2</i>     | 5'UTR   |
| cg16387254 | 1  | 231,472,287 | 0.000795 | -0.203 | -0.183 |            |        |  | <i>C1orf124</i>  | TSS1500 |
| cg01736133 | 4  | 120,605,519 | 4.14E-05 | -0.203 | -0.196 |            |        |  |                  |         |
| cg02909176 | 13 | 113,426,343 | 0.000212 | -0.203 | -0.187 |            |        |  | <i>ATP11A</i>    | Body    |

|            |    |             |          |        |        |            |        |     |                  |         |
|------------|----|-------------|----------|--------|--------|------------|--------|-----|------------------|---------|
| cg16180848 | 11 | 3,612,651   | 0.000333 | -0.203 | -0.147 |            |        |     |                  |         |
| cg05073620 | 3  | 57,530,799  | 9.9E-06  | -0.203 | -0.145 |            |        |     | <i>DNAH12</i>    | TSS1500 |
| cg12491169 | 11 | 40,137,955  | 0.045096 | -0.203 | -0.149 |            |        |     | <i>LRRC4C</i>    | 5'UTR   |
| cg24141885 | 5  | 12,883,715  | 0.017334 | -0.203 | -0.152 |            |        |     |                  |         |
| cg05307141 | 1  | 170,132,227 | 0.008258 | -0.203 | -0.135 |            |        |     | <i>METTL11B</i>  | Body    |
| cg19524824 | 12 | 50,023,313  | 0.000238 | -0.203 | -0.167 |            |        |     | <i>PRPF40B</i>   | 5'UTR   |
| cg26390526 | 1  | 152,299,078 | 0.044117 | -0.203 | -0.243 | 0.00025886 | -0.117 |     | <i>FLG</i>       | TSS1500 |
| cg26442740 | 12 | 55,613,318  | 0.04717  | -0.203 | -0.147 |            |        |     | <i>OR10A7</i>    | TSS1500 |
| cg27019059 | 3  | 133,852,523 | 2.83E-05 | -0.203 | -0.202 |            |        |     |                  |         |
| cg03848127 | 5  | 100,126,093 | 0.003494 | -0.203 | -0.189 |            |        |     |                  |         |
| cg10968815 | 20 | 31,595,346  | 0.001438 | -0.203 | -0.229 | 4.95E-13   | -0.111 |     | <i>BPIL1</i>     | TSS200  |
| cg15075709 | 11 | 1,217,335   | 0.024126 | -0.203 | -0.045 |            |        |     |                  |         |
| cg04611649 | 2  | 152,681,240 | 1.05E-07 | -0.203 | -0.197 |            |        |     | <i>ARL5A</i>     | Body    |
| cg18574911 | 17 | 80,355,371  | 0.005813 | -0.203 | -0.270 |            |        |     | <i>C17orf101</i> | Body    |
| cg15627145 | 10 | 61,802,440  | 1.29E-06 | -0.203 | -0.213 |            |        |     | <i>ANK3</i>      | 3'UTR   |
| cg21052687 | 11 | 55,561,545  | 0.019835 | -0.203 | -0.197 |            |        |     | <i>OR5D14</i>    | TSS1500 |
| cg01938476 | 12 | 7,076,853   | 6.72E-06 | -0.203 | -0.215 |            |        |     | <i>SCARNA12</i>  | TSS200  |
| cg07385257 | 8  | 35,803,167  | 0.003785 | -0.203 | -0.200 |            |        |     |                  |         |
| cg05119467 | 1  | 1,765,440   | 3.84E-08 | -0.203 | -0.185 |            |        |     | <i>GNB1</i>      | 5'UTR   |
| cg13054975 | 1  | 205,603,464 | 0.024536 | -0.203 | -0.079 |            |        |     | <i>ELK4</i>      | TSS1500 |
| cg18289710 | 11 | 103,811,641 | 0.001142 | -0.203 | -0.213 |            |        |     | <i>PDGFD</i>     | Body    |
| cg24640735 | 12 | 10,065,986  | 0.011247 | -0.203 | -0.110 |            |        |     | <i>CLEC2A</i>    | 3'UTR   |
| cg02638909 | 8  | 30,888,801  | 0.00086  | -0.203 | -0.201 |            |        |     | <i>PURG</i>      | Body    |
| cg13784443 | 2  | 80,807,289  | 0.001771 | -0.203 | -0.232 |            |        | Yes | <i>CTNNA2</i>    | Body    |
| cg17603763 | 11 | 94,799,719  | 3.01E-14 | -0.203 | -0.202 |            |        |     | <i>SFRS2B</i>    | TSS1500 |
| cg18480432 | 13 | 63,637,003  | 0.002231 | -0.203 | -0.194 |            |        |     |                  |         |
| cg27509347 | 1  | 28,385,657  | 1.01E-07 | -0.203 | -0.209 |            |        |     | <i>EYA3</i>      | 5'UTR   |
| cg15803671 | 18 | 3,457,981   | 9.94E-05 | -0.203 | -0.232 |            |        |     | <i>TGIF1</i>     | 3'UTR   |
| cg22956205 | 13 | 43,321,660  | 4.89E-06 | -0.203 | -0.203 |            |        |     |                  |         |
| cg24299913 | 19 | 42,408,316  | 0.000534 | -0.203 | -0.180 |            |        |     | <i>ARHGEF1</i>   | Body    |
| cg09075787 | 2  | 69,965,513  | 0.001136 | -0.203 | -0.196 |            |        |     |                  |         |
| cg27504460 | 2  | 188,169,789 | 0.004585 | -0.203 | -0.136 |            |        |     |                  |         |
| cg16462006 | 14 | 95,155,784  | 0.016277 | -0.203 | -0.266 |            |        |     |                  |         |
| cg00054741 | 19 | 54,201,247  | 0.026545 | -0.203 | -0.171 |            |        |     | <i>MIR523</i>    | TSS1500 |

|            |    |             |          |        |        |            |        |  |                  |         |
|------------|----|-------------|----------|--------|--------|------------|--------|--|------------------|---------|
| cg23384017 | 4  | 52,808,725  | 0.023392 | -0.203 | -0.153 |            |        |  |                  |         |
| cg15646919 | 18 | 77,608,799  | 0.000563 | -0.203 | -0.239 |            |        |  |                  |         |
| cg13846509 | 8  | 64,376,550  | 0.004726 | -0.203 | -0.177 |            |        |  |                  |         |
| cg25122699 | 5  | 173,314,531 | 1.92E-06 | -0.203 | -0.181 |            |        |  | <i>CPEB4</i>     | TSS1500 |
| cg10705800 | 1  | 41,328,420  | 9.68E-16 | -0.203 | -0.195 | 0.00000508 | -0.046 |  | <i>CITED4</i>    | TSS1500 |
| cg27180868 | 1  | 161,008,750 | 3.54E-11 | -0.203 | -0.195 |            |        |  | <i>TSTD1</i>     | 5'UTR   |
| cg07465609 | 6  | 66,205,227  | 0.016418 | -0.203 | -0.171 | 0.00000222 | -0.140 |  | <i>EYS</i>       | Body    |
| cg11395306 | 11 | 98,939,366  | 0.009599 | -0.203 | -0.134 |            |        |  | <i>CNTN5</i>     | 5'UTR   |
| cg00045910 | 10 | 23,466,070  | 0.003442 | -0.203 | -0.187 |            |        |  |                  |         |
| cg01229658 | 15 | 70,924,395  | 2.2E-05  | -0.203 | -0.188 |            |        |  |                  |         |
| cg08273233 | 6  | 87,724,979  | 0.000324 | -0.203 | -0.149 |            |        |  | <i>HTR1E</i>     | 5'UTR   |
| cg24328944 | 13 | 96,256,596  | 3.93E-08 | -0.203 | -0.200 |            |        |  | <i>DZIP1</i>     | Body    |
| cg12032655 | 19 | 43,856,746  | 1.31E-06 | -0.203 | -0.183 |            |        |  | <i>CD177</i>     | TSS1500 |
| cg23210521 | 4  | 95,680,414  | 3.14E-06 | -0.203 | -0.197 |            |        |  | <i>BMPR1B</i>    | 5'UTR   |
| cg03698145 | 15 | 98,064,729  | 0.024341 | -0.203 | -0.163 |            |        |  |                  |         |
| cg09159821 | 5  | 146,937,183 | 0.000961 | -0.203 | -0.145 |            |        |  |                  |         |
| cg20897616 | 15 | 26,874,515  | 1.77E-06 | -0.203 | -0.163 |            |        |  | <i>GABRB3</i>    | Body    |
| cg24540281 | 2  | 105,912,735 | 6.8E-05  | -0.203 | -0.198 |            |        |  | <i>TGFBRAP1</i>  | Body    |
| cg14703102 | 17 | 2,975,585   | 0.006617 | -0.203 | -0.121 |            |        |  |                  |         |
| cg25184787 | 20 | 3,898,644   | 0.013334 | -0.203 | -0.162 |            |        |  | <i>PANK2</i>     | Body    |
| cg16890121 | 13 | 28,198,579  | 0.000342 | -0.203 | -0.143 |            |        |  | <i>POLR1D</i>    | Body    |
| cg03769908 | 7  | 79,631,950  | 0.012845 | -0.203 | -0.218 |            |        |  |                  |         |
| cg07516307 | 6  | 33,165,658  | 0.000158 | -0.203 | -0.181 |            |        |  | <i>RXRБ</i>      | Body    |
| cg20901464 | 13 | 112,763,220 | 0.015486 | -0.203 | -0.076 |            |        |  |                  |         |
| cg13797779 | 14 | 99,180,409  | 0.03029  | -0.203 | -0.136 |            |        |  | <i>C14orf177</i> | 5'UTR   |
| cg20316758 | 13 | 106,797,152 | 6.94E-06 | -0.203 | -0.202 |            |        |  |                  |         |
| cg14412833 | 9  | 128,021,077 | 5.87E-05 | -0.203 | -0.194 |            |        |  |                  |         |
| cg10449561 | 5  | 25,909,633  | 0.013761 | -0.203 | -0.120 |            |        |  |                  |         |
| cg13480465 | 4  | 16,795,757  | 0.000303 | -0.203 | -0.214 |            |        |  | <i>LDB2</i>      | Body    |
| cg07999668 | 12 | 8,765,336   | 0.04336  | -0.203 | -0.125 |            |        |  | <i>AICDA</i>     | Body    |
| cg26218823 | X  | 146,318,566 | 0.038419 | -0.203 | -0.158 |            |        |  | <i>MIR508</i>    | TSS200  |
| cg05170856 | 16 | 32,255,825  | 0.000257 | -0.203 | -0.190 |            |        |  |                  |         |
| cg01212562 | 21 | 46,868,092  | 0.003234 | -0.203 | -0.211 |            |        |  | <i>COL18A1</i>   | Body    |
| cg10506618 | 3  | 42,246,902  | 0.00526  | -0.203 | -0.199 |            |        |  | <i>TRAK1</i>     | Body    |

|            |    |             |          |        |        |            |        |     |                      |         |
|------------|----|-------------|----------|--------|--------|------------|--------|-----|----------------------|---------|
| cg15570432 | 20 | 30,460,881  | 0.037034 | -0.203 | -0.105 |            |        |     | <i>TLL9</i>          | Body    |
| cg18827756 | 15 | 42,130,735  | 0.000202 | -0.203 | -0.195 |            |        |     | <i>JMJD7-PLA2G4B</i> | Body    |
| cg00107916 | 5  | 3,188,066   | 0.01659  | -0.203 | -0.248 |            |        |     |                      |         |
| cg19894085 | 12 | 66,633,274  | 6.44E-05 | -0.203 | -0.154 |            |        | Yes | <i>IRAK3</i>         | Body    |
| cg04012844 | 22 | 49,020,400  | 0.002832 | -0.203 | -0.214 |            |        |     | <i>FAM19A5</i>       | Body    |
| cg04830757 | 5  | 87,880,065  | 7.91E-05 | -0.203 | -0.203 |            |        |     | <i>LOC645323</i>     | Body    |
| cg10946681 | 12 | 127,633,722 | 0.005981 | -0.203 | -0.149 |            |        |     |                      |         |
| cg17259265 | 11 | 125,753,373 | 0.00531  | -0.203 | -0.133 | 0.00000355 | -0.083 |     | <i>HYLS1</i>         | TSS200  |
| cg19205850 | 3  | 128,446,370 | 1.55E-11 | -0.203 | -0.216 |            |        |     | <i>RAB7A</i>         | 5'UTR   |
| cg22109208 | 1  | 172,414,443 | 0.001495 | -0.203 | -0.150 |            |        |     | <i>C1orf105</i>      | Body    |
| cg23154497 | 10 | 134,919,573 | 0.01076  | -0.203 | -0.132 |            |        |     | <i>GPR123</i>        | Body    |
| cg07033253 | 7  | 75,908,694  | 8.7E-06  | -0.203 | -0.209 |            |        |     | <i>SRRM3</i>         | Body    |
| cg08626382 | 11 | 62,108,591  | 1.11E-06 | -0.203 | -0.191 |            |        |     | <i>ASRGL1</i>        | Body    |
| cg01889083 | 3  | 36,803,565  | 0.045742 | -0.203 | -0.128 |            |        |     |                      |         |
| cg08426130 | 15 | 95,872,552  | 0.000765 | -0.203 | -0.144 |            |        |     |                      |         |
| cg15382258 | 7  | 48,495,072  | 0.03838  | -0.203 | -0.131 |            |        |     | <i>ABCA13</i>        | Body    |
| cg21304163 | 19 | 35,607,221  | 3.25E-05 | -0.203 | -0.193 |            |        |     | <i>FXD3</i>          | 5'UTR   |
| cg21723559 | 20 | 44,048,174  | 5.7E-08  | -0.203 | -0.215 |            |        |     | <i>PIGT</i>          | Body    |
| cg15446073 | 11 | 62,339,136  | 2.12E-05 | -0.203 | -0.134 |            |        |     | <i>EEF1G</i>         | Body    |
| cg10543582 | 2  | 199,202,432 | 0.002694 | -0.203 | -0.155 |            |        |     |                      |         |
| cg21029155 | 13 | 20,069,043  | 0.001897 | -0.203 | -0.156 |            |        |     | <i>TPTE2</i>         | Body    |
| cg07338464 | 5  | 148,244,123 | 1.28E-08 | -0.203 | -0.179 |            |        |     |                      |         |
| cg07585334 | 16 | 8,617,571   | 4.75E-05 | -0.203 | -0.193 |            |        |     |                      |         |
| cg20992439 | 15 | 91,429,916  | 0.001513 | -0.203 | -0.154 |            |        |     | <i>FES</i>           | Body    |
| cg22812604 | 8  | 140,417,841 | 3.46E-05 | -0.203 | -0.176 |            |        |     |                      |         |
| cg21643429 | 15 | 28,216,043  | 0.008991 | -0.203 | -0.212 |            |        |     | <i>OCA2</i>          | Body    |
| cg03592833 | 3  | 194,129,373 | 0.002773 | -0.203 | -0.193 |            |        |     | <i>ATP13A3</i>       | Body    |
| cg07805642 | 6  | 132,890,602 | 0.035968 | -0.203 | -0.144 |            |        |     | <i>TAAR6</i>         | TSS1500 |
| cg24158157 | 10 | 124,581,726 | 0.000456 | -0.203 | -0.147 |            |        |     |                      |         |
| cg08204867 | 16 | 10,208,426  | 0.000116 | -0.204 | -0.223 |            |        |     | <i>GRIN2A</i>        | Body    |
| cg19870706 | 1  | 75,469,109  | 3.73E-05 | -0.204 | -0.187 |            |        |     |                      |         |
| cg26492744 | X  | 68,046,595  | 4.58E-10 | -0.204 | -0.190 |            |        |     |                      |         |
| cg11185753 | 8  | 105,988,283 | 0.006952 | -0.204 | -0.235 |            |        |     |                      |         |
| cg16450097 | 8  | 101,348,467 | 0.008978 | -0.204 | -0.198 |            |        |     |                      |         |

|            |    |             |          |        |        |  |  |  |                  |         |
|------------|----|-------------|----------|--------|--------|--|--|--|------------------|---------|
| cg14005657 | Y  | 9,365,108   | 0.024625 | -0.204 | -0.127 |  |  |  | <i>TSPY3</i>     | TSS1500 |
| cg25904183 | 4  | 165,877,875 | 2.25E-05 | -0.204 | -0.220 |  |  |  | <i>C4orf39</i>   | TSS1500 |
| cg00920269 | 7  | 45,431,741  | 0.007949 | -0.204 | -0.110 |  |  |  |                  |         |
| cg08312198 | 2  | 235,961,352 | 0.022945 | -0.204 | -0.106 |  |  |  | <i>SH3BP4</i>    | Body    |
| cg14104148 | 11 | 126,203,133 | 0.000274 | -0.204 | -0.098 |  |  |  | <i>DCPS</i>      | Body    |
| cg26353859 | 12 | 60,081,776  | 0.028264 | -0.204 | -0.096 |  |  |  | <i>SLC16A7</i>   | TSS1500 |
| cg17453252 | 13 | 110,964,116 | 0.017717 | -0.204 | -0.096 |  |  |  | <i>COL4A2</i>    | Body    |
| cg03240663 | 19 | 52,150,547  | 0.033388 | -0.204 | -0.183 |  |  |  | <i>SIGLEC14</i>  | TSS1500 |
| cg09874415 | 1  | 35,989,973  | 0.001245 | -0.204 | -0.176 |  |  |  | <i>KIAA0319L</i> | Body    |
| cg06868132 | 5  | 178,987,429 | 0.013095 | -0.204 | -0.267 |  |  |  | <i>RUFY1</i>     | Body    |
| cg18456942 | 20 | 29,956,330  | 0.001862 | -0.204 | -0.214 |  |  |  | <i>DEFB118</i>   | TSS200  |
| cg23198334 | 10 | 76,179,907  | 5.45E-05 | -0.204 | -0.199 |  |  |  | <i>ADK</i>       | Body    |
| cg21409829 | 1  | 2,850,859   | 0.020642 | -0.204 | -0.084 |  |  |  |                  |         |
| cg25153233 | 20 | 37,854,269  | 0.014223 | -0.204 | -0.134 |  |  |  | <i>LOC339568</i> | TSS1500 |
| cg26806260 | 15 | 62,356,512  | 1.23E-06 | -0.204 | -0.214 |  |  |  |                  |         |
| cg01171429 | 16 | 69,939,015  | 0.003016 | -0.204 | -0.156 |  |  |  | <i>WWP2</i>      | Body    |
| cg00532449 | 1  | 2,375,420   | 0.009285 | -0.204 | -0.249 |  |  |  |                  |         |
| cg17536071 | 4  | 71,383,999  | 1.6E-06  | -0.204 | -0.213 |  |  |  | <i>AMTN</i>      | TSS1500 |
| cg20792256 | 19 | 14,992,047  | 3.8E-05  | -0.204 | -0.142 |  |  |  | <i>OR7A17</i>    | 1stExon |
| cg26872482 | 6  | 32,051,108  | 4.24E-09 | -0.204 | -0.211 |  |  |  | <i>TNXB</i>      | Body    |
| cg07744216 | 19 | 7,682,838   | 0.004932 | -0.204 | -0.146 |  |  |  | <i>KIAA1543</i>  | Body    |
| cg25077371 | 10 | 10,346,139  | 0.01929  | -0.204 | -0.184 |  |  |  |                  |         |
| cg04735660 | 1  | 176,999,916 | 0.000363 | -0.204 | -0.182 |  |  |  | <i>MIR488</i>    | TSS1500 |
| cg18086520 | 4  | 186,741,362 | 0.019784 | -0.204 | -0.161 |  |  |  | <i>SORBS2</i>    | 5'UTR   |
| cg19580003 | 13 | 19,236,676  | 0.033346 | -0.204 | -0.115 |  |  |  |                  |         |
| cg14020914 | 19 | 53,798,641  | 0.000621 | -0.204 | -0.224 |  |  |  |                  |         |
| cg16298202 | 4  | 122,680,946 | 0.007599 | -0.204 | -0.126 |  |  |  | <i>TMEM155</i>   | 3'UTR   |
| cg24369466 | 6  | 31,843,146  | 0.000275 | -0.204 | -0.221 |  |  |  | <i>SLC44A4</i>   | Body    |
| cg27500983 | 20 | 34,700,201  | 9.87E-06 | -0.204 | -0.226 |  |  |  | <i>EPB41L1</i>   | TSS200  |
| cg05604487 | 17 | 77,386,277  | 0.002661 | -0.204 | -0.168 |  |  |  | <i>HRNBP3</i>    | 5'UTR   |
| cg00865390 | 8  | 91,713,322  | 0.010995 | -0.204 | -0.242 |  |  |  |                  |         |
| cg27666123 | 5  | 126,988,029 | 0.002641 | -0.204 | -0.133 |  |  |  | <i>CTXN3</i>     | 5'UTR   |
| cg25463409 | 4  | 46,848,264  | 0.000311 | -0.204 | -0.122 |  |  |  | <i>COX7B2</i>    | 5'UTR   |
| cg25458175 | 19 | 59,025,570  | 3.87E-06 | -0.204 | -0.172 |  |  |  | <i>ZBTB45</i>    | Body    |

|            |    |             |          |        |        |            |        |     |                           |         |
|------------|----|-------------|----------|--------|--------|------------|--------|-----|---------------------------|---------|
| cg12943259 | 8  | 89,603,364  | 0.043268 | -0.204 | -0.115 |            |        |     |                           |         |
| cg08543028 | 12 | 31,902,503  | 2.6E-07  | -0.204 | -0.198 |            |        | Yes |                           |         |
| cg23180171 | 12 | 113,055,704 | 2.87E-05 | -0.204 | -0.189 |            |        |     |                           |         |
| cg01963464 | 2  | 228,339,337 | 2.45E-06 | -0.204 | -0.178 |            |        | Yes | <i>AGFG1</i>              | Body    |
| cg14430151 | 4  | 8,440,600   | 0.000721 | -0.204 | -0.184 |            |        |     | <i>ACOX3</i>              | 5'UTR   |
| cg08510178 | 6  | 165,062,070 | 0.003936 | -0.204 | -0.149 |            |        |     |                           |         |
| cg14680360 | 17 | 39,598,430  | 0.000115 | -0.204 | -0.119 |            |        |     | <i>KRT38</i>              | TSS1500 |
| cg07529428 | 12 | 15,717,516  | 6.75E-08 | -0.204 | -0.210 |            |        |     | <i>PTPRO</i>              | Body    |
| cg11780053 | 19 | 7,268,027   | 0.020203 | -0.204 | -0.208 |            |        |     | <i>INSR</i>               | Body    |
| cg26621014 | X  | 88,001,695  | 0.039735 | -0.204 | -0.100 |            |        |     | <i>CPXCR1</i>             | TSS1500 |
| cg05569767 | 18 | 76,638,494  | 0.027054 | -0.204 | -0.089 |            |        |     |                           |         |
| cg13705774 | 1  | 152,670,764 | 0.019297 | -0.204 | -0.195 |            |        |     | <i>LCE2A</i>              | TSS200  |
| cg18448898 | 2  | 128,788,611 | 0.000212 | -0.204 | -0.245 |            |        |     |                           |         |
| cg21038123 | 16 | 733,280     | 4.31E-11 | -0.204 | -0.202 |            |        |     | <i>JMJD8</i>              | Body    |
| cg16773563 | 7  | 44,614,475  | 0.025772 | -0.204 | -0.202 |            |        |     | <i>DDX56</i>              | TSS1500 |
| cg23865597 | 18 | 46,987,786  | 0.038269 | -0.204 | -0.225 |            |        |     | <i>DYM</i>                | TSS1500 |
| cg00180631 | X  | 149,736,640 | 0.005701 | -0.204 | -0.216 | 0.00511158 | -0.055 |     | <i>MTM1</i>               | TSS1500 |
| cg22436195 | 4  | 154,951,775 | 0.04749  | -0.204 | -0.127 |            |        | Yes |                           |         |
| cg02570643 | 5  | 77,531,473  | 0.027467 | -0.204 | -0.114 |            |        |     | <i>AP3B1</i>              | Body    |
| cg02573176 | 8  | 82,607,505  | 0.000129 | -0.204 | -0.214 |            |        |     | <i>SLC10A5</i>            | TSS1500 |
| cg04629433 | 11 | 124,191,389 | 0.021935 | -0.204 | -0.123 |            |        |     | <i>OR8D2</i>              | TSS1500 |
| cg08510253 | 11 | 31,904,940  | 0.03331  | -0.204 | -0.178 |            |        |     |                           |         |
| cg26130533 | 4  | 1,202,700   | 8E-08    | -0.204 | -0.176 |            |        |     | <i>LOC100130872-SPON2</i> | TSS200  |
| cg10835286 | 2  | 66,657,913  | 5.61E-07 | -0.204 | -0.222 |            |        |     |                           |         |
| cg14613361 | 1  | 109,751,302 | 1.31E-05 | -0.204 | -0.169 |            |        |     |                           |         |
| cg00461311 | 12 | 109,460,299 | 2.08E-06 | -0.204 | -0.199 |            |        |     | <i>SVOP</i>               | TSS1500 |
| cg21340845 | 2  | 142,890,700 | 1.32E-05 | -0.204 | -0.218 |            |        |     | <i>LRP1B</i>              | TSS1500 |
| cg19655510 | 20 | 62,374,329  | 0.001057 | -0.204 | -0.216 |            |        |     | <i>SLC2A4RG</i>           | Body    |
| cg21765730 | 6  | 155,777,175 | 0.000695 | -0.204 | -0.163 |            |        |     | <i>NOX3</i>               | TSS200  |
| cg25812683 | 10 | 6,691,515   | 0.002108 | -0.204 | -0.206 |            |        |     |                           |         |
| cg02671458 | 5  | 178,801,812 | 0.020075 | -0.204 | -0.103 |            |        |     |                           |         |
| cg25939242 | 4  | 9,371,392   | 0.01866  | -0.204 | -0.111 |            |        |     |                           |         |
| cg20506745 | 2  | 2,581,285   | 1.08E-09 | -0.204 | -0.189 |            |        |     |                           |         |
| cg14626907 | 6  | 33,873,691  | 0.001121 | -0.204 | -0.144 |            |        |     |                           |         |

|            |    |             |          |        |        |  |  |     |                 |         |
|------------|----|-------------|----------|--------|--------|--|--|-----|-----------------|---------|
| cg20658635 | 15 | 26,877,820  | 1.26E-06 | -0.204 | -0.199 |  |  |     | <i>GABRB3</i>   | Body    |
| cg08632095 | 5  | 172,639,423 | 0.001838 | -0.204 | -0.117 |  |  |     |                 |         |
| cg13590475 | 6  | 133,137,827 | 6.37E-06 | -0.204 | -0.163 |  |  |     | <i>RPS12</i>    | Body    |
| cg05932024 | 2  | 42,086,889  | 2.35E-06 | -0.204 | -0.186 |  |  |     |                 |         |
| cg21848981 | 4  | 190,597,409 | 0.001849 | -0.204 | -0.179 |  |  |     |                 |         |
| cg22106847 | 5  | 118,584,299 | 0.000208 | -0.204 | -0.213 |  |  |     | <i>DMXL1</i>    | 3'UTR   |
| cg23673761 | 1  | 196,865,686 | 0.01635  | -0.204 | -0.195 |  |  |     | <i>CFHR4</i>    | Body    |
| cg08702011 | 16 | 86,934,677  | 0.0448   | -0.204 | -0.084 |  |  | Yes |                 |         |
| cg23200873 | 3  | 167,191,837 | 0.017203 | -0.204 | -0.143 |  |  |     | <i>SERPINI2</i> | TSS200  |
| cg01661742 | 4  | 142,141,192 | 0.043567 | -0.204 | -0.191 |  |  |     | <i>ZNF330</i>   | TSS1500 |
| cg00571870 | 6  | 109,349,597 | 5.84E-06 | -0.204 | -0.216 |  |  |     | <i>SESN1</i>    | Body    |
| cg14300812 | 9  | 134,818,827 | 0.00771  | -0.204 | -0.226 |  |  |     | <i>MED27</i>    | Body    |
| cg26560419 | 6  | 72,290,918  | 0.037952 | -0.204 | -0.237 |  |  |     |                 |         |
| cg04672506 | 6  | 33,117,384  | 1.6E-05  | -0.204 | -0.184 |  |  |     |                 |         |
| cg05361594 | 13 | 68,220,805  | 0.014891 | -0.204 | -0.226 |  |  |     |                 |         |
| cg05991092 | 10 | 134,731,965 | 0.000224 | -0.204 | -0.206 |  |  |     |                 |         |
| cg10735319 | 14 | 65,121,324  | 2.22E-11 | -0.204 | -0.205 |  |  |     |                 |         |
| cg14591439 | 5  | 121,190,799 | 0.043238 | -0.204 | -0.092 |  |  |     |                 |         |
| cg02335700 | 12 | 110,282,809 | 0.001054 | -0.204 | -0.141 |  |  |     |                 |         |
| cg11356398 | 10 | 133,783,182 | 0.000389 | -0.204 | -0.196 |  |  |     | <i>BNIP3</i>    | Body    |
| cg16993682 | 1  | 158,259,268 | 0.000572 | -0.204 | -0.218 |  |  |     | <i>CD1C</i>     | TSS1500 |
| cg25614726 | 1  | 10,490,058  | 2.64E-17 | -0.204 | -0.198 |  |  |     | <i>APITD1</i>   | TSS200  |
| cg00859147 | 19 | 8,841,460   | 0.026293 | -0.204 | -0.164 |  |  |     | <i>OR2Z1</i>    | 1stExon |
| cg12275410 | 10 | 135,123,239 | 0.000148 | -0.204 | -0.197 |  |  |     | <i>ZNF511</i>   | Body    |
| cg17920195 | 4  | 129,149,383 | 8.06E-10 | -0.204 | -0.189 |  |  |     |                 |         |
| cg07412043 | 2  | 137,748,366 | 0.013384 | -0.204 | -0.163 |  |  |     | <i>THSD7B</i>   | TSS200  |
| cg17339327 | 6  | 31,939,025  | 4.01E-06 | -0.204 | -0.214 |  |  |     | <i>STK19</i>    | TSS1500 |
| cg15287443 | 3  | 147,121,229 | 2.7E-07  | -0.204 | -0.184 |  |  |     | <i>ZIC4</i>     | Body    |
| cg19333980 | 20 | 5,094,433   | 0.000876 | -0.204 | -0.204 |  |  |     | <i>C20orf30</i> | TSS1500 |
| cg00976619 | 3  | 156,876,725 | 1.52E-08 | -0.204 | -0.221 |  |  |     | <i>CCNL1</i>    | Body    |
| cg02309868 | 19 | 35,741,001  | 8.24E-08 | -0.204 | -0.173 |  |  |     | <i>LSR</i>      | Body    |
| cg15602359 | 22 | 50,144,431  | 0.007972 | -0.204 | -0.117 |  |  |     |                 |         |
| cg20743708 | 11 | 4,726,105   | 0.002807 | -0.204 | -0.171 |  |  |     |                 |         |
| cg25882240 | 10 | 134,868,158 | 0.013143 | -0.204 | -0.101 |  |  |     |                 |         |



|            |    |             |          |        |        |  |  |  |                  |         |
|------------|----|-------------|----------|--------|--------|--|--|--|------------------|---------|
| cg00817501 | 4  | 138,440,719 | 4.8E-09  | -0.204 | -0.186 |  |  |  | <i>PCDH18</i>    | 3'UTR   |
| cg27152299 | 11 | 71,238,225  | 5.7E-05  | -0.204 | -0.170 |  |  |  | <i>KRTAP5-7</i>  | TSS200  |
| cg01752041 | 8  | 63,055,444  | 0.048327 | -0.204 | -0.193 |  |  |  |                  |         |
| cg08881938 | 3  | 132,599,319 | 0.012854 | -0.204 | -0.240 |  |  |  |                  |         |
| cg02470923 | 13 | 22,392,755  | 0.028183 | -0.204 | -0.137 |  |  |  |                  |         |
| cg27455211 | 16 | 86,734,223  | 0.003135 | -0.204 | -0.134 |  |  |  |                  |         |
| cg04362839 | 14 | 105,688,421 | 0.013268 | -0.204 | -0.164 |  |  |  | <i>BRF1</i>      | Body    |
| cg12331160 | 2  | 135,290,945 | 0.001409 | -0.204 | -0.123 |  |  |  | <i>TMEM163</i>   | Body    |
| cg18450130 | 14 | 105,031,193 | 0.011855 | -0.204 | -0.121 |  |  |  |                  |         |
| cg01157146 | 21 | 42,877,638  | 1.44E-14 | -0.204 | -0.201 |  |  |  | <i>TMPRSS2</i>   | Body    |
| cg02361306 | 19 | 35,940,461  | 4.9E-08  | -0.204 | -0.189 |  |  |  | <i>FFAR2</i>     | TSS200  |
| cg25486039 | 6  | 41,715,166  | 9.41E-06 | -0.204 | -0.174 |  |  |  | <i>PGC</i>       | TSS200  |
| cg26979537 | 19 | 48,016,860  | 0.00074  | -0.204 | -0.190 |  |  |  | <i>NAPA</i>      | Body    |
| cg05334655 | 14 | 23,890,294  | 0.00038  | -0.204 | -0.184 |  |  |  | <i>MYH7</i>      | Body    |
| cg09048404 | 2  | 91,937,754  | 0.012148 | -0.204 | -0.157 |  |  |  |                  |         |
| cg19549898 | 14 | 68,000,922  | 3.35E-07 | -0.204 | -0.234 |  |  |  | <i>PLEKHH1</i>   | 5'UTR   |
| cg10167508 | 20 | 46,988,400  | 0.024685 | -0.204 | -0.159 |  |  |  | <i>LOC284749</i> | TSS1500 |
| cg07682515 | 10 | 134,838,014 | 3.25E-05 | -0.205 | -0.163 |  |  |  |                  |         |
| cg18339075 | 18 | 76,555,521  | 0.029976 | -0.205 | -0.063 |  |  |  |                  |         |
| cg18477674 | 10 | 133,793,527 | 0.010134 | -0.205 | -0.201 |  |  |  | <i>BNIP3</i>     | Body    |
| cg21538450 | 1  | 205,313,833 | 1.01E-06 | -0.205 | -0.240 |  |  |  | <i>KLHDC8A</i>   | 5'UTR   |
| cg26476852 | 7  | 27,204,728  | 0.001621 | -0.205 | -0.129 |  |  |  | <i>HOXA9</i>     | 1stExon |
| cg25249713 | 4  | 177,045,356 | 0.000351 | -0.205 | -0.195 |  |  |  | <i>WDR17</i>     | Body    |
| cg11675165 | 8  | 117,853,304 | 4.78E-05 | -0.205 | -0.164 |  |  |  |                  |         |
| cg02321821 | 17 | 79,804,422  | 0.029738 | -0.205 | -0.182 |  |  |  | <i>P4HB</i>      | Body    |
| cg07778145 | 16 | 17,178,083  | 0.014956 | -0.205 | -0.089 |  |  |  |                  |         |
| cg03519907 | 5  | 154,092,426 | 0.000121 | -0.205 | -0.192 |  |  |  | <i>LARP1</i>     | TSS200  |
| cg06961205 | 6  | 6,623,143   | 1.16E-05 | -0.205 | -0.138 |  |  |  | <i>LOC285780</i> | TSS200  |
| cg15771735 | 6  | 57,614,321  | 0.007917 | -0.205 | -0.252 |  |  |  |                  |         |
| cg04961042 | 14 | 30,218,600  | 0.01058  | -0.205 | -0.253 |  |  |  | <i>PRKD1</i>     | Body    |
| cg23138161 | 8  | 27,337,259  | 0.000691 | -0.205 | -0.189 |  |  |  | <i>CHRNA2</i>    | TSS1500 |
| cg01743846 | 9  | 127,176,827 | 1.21E-05 | -0.205 | -0.193 |  |  |  | <i>PSMB7</i>     | Body    |
| cg24656517 | 4  | 40,844,307  | 2.93E-05 | -0.205 | -0.229 |  |  |  | <i>APBB2</i>     | Body    |
| cg19667460 | 15 | 60,863,379  | 0.000169 | -0.205 | -0.220 |  |  |  | <i>RORA</i>      | Body    |

|            |    |             |          |        |        |  |  |     |                 |         |
|------------|----|-------------|----------|--------|--------|--|--|-----|-----------------|---------|
| cg22706106 | 1  | 153,607,701 | 6.5E-10  | -0.205 | -0.191 |  |  |     | <i>C1orf77</i>  | 5'UTR   |
| cg14971327 | 5  | 4,230,502   | 0.037134 | -0.205 | -0.120 |  |  |     |                 |         |
| cg22062667 | 2  | 187,081,534 | 0.009625 | -0.205 | -0.241 |  |  |     |                 |         |
| cg24732563 | 1  | 204,349,887 | 1.5E-05  | -0.205 | -0.180 |  |  |     |                 |         |
| cg15252768 | 10 | 133,273,850 | 0.035042 | -0.205 | -0.066 |  |  |     |                 |         |
| cg05060976 | 18 | 21,741,492  | 0.000319 | -0.205 | -0.183 |  |  |     | <i>CABYR</i>    | 3'UTR   |
| cg22413399 | 11 | 55,028,287  | 0.004356 | -0.205 | -0.134 |  |  |     | <i>TRIM48</i>   | TSS1500 |
| cg00989002 | 16 | 52,225,569  | 2.41E-05 | -0.205 | -0.171 |  |  |     |                 |         |
| cg01871498 | 16 | 4,855,523   | 0.000138 | -0.205 | -0.172 |  |  | Yes | <i>GLYR1</i>    | Body    |
| cg07882687 | X  | 49,460,608  | 0.031061 | -0.205 | -0.105 |  |  |     | <i>PAGE1</i>    | TSS200  |
| cg21347412 | 19 | 4,339,217   | 0.000142 | -0.205 | -0.167 |  |  |     | <i>STAP2</i>    | TSS1500 |
| cg02562419 | 6  | 159,049,626 | 0.003393 | -0.205 | -0.239 |  |  |     | <i>TMEM181</i>  | Body    |
| cg27599015 | 20 | 50,175,489  | 0.036012 | -0.205 | -0.200 |  |  |     | <i>NFATC2</i>   | Body    |
| cg05229723 | 12 | 104,526,470 | 2.32E-06 | -0.205 | -0.238 |  |  |     | <i>NFYB</i>     | Body    |
| cg13540981 | 6  | 32,011,506  | 0.000841 | -0.205 | -0.112 |  |  |     | <i>TNXB</i>     | Body    |
| cg24573321 | 6  | 69,726,000  | 0.001454 | -0.205 | -0.218 |  |  |     | <i>BAI3</i>     | Body    |
| cg00558645 | 1  | 218,711,575 | 8.2E-06  | -0.205 | -0.238 |  |  |     |                 |         |
| cg07863354 | 17 | 80,832,611  | 5.53E-05 | -0.205 | -0.215 |  |  |     | <i>TBCD</i>     | Body    |
| cg23167506 | 7  | 1,303,302   | 2.73E-07 | -0.205 | -0.208 |  |  |     |                 |         |
| cg12617456 | 1  | 85,240,821  | 1.1E-05  | -0.205 | -0.184 |  |  |     |                 |         |
| cg23511851 | 13 | 108,087,589 | 0.001333 | -0.205 | -0.143 |  |  |     | <i>FAM155A</i>  | Body    |
| cg02216731 | 16 | 801,936     | 3.08E-06 | -0.205 | -0.201 |  |  |     |                 |         |
| cg08695113 | 10 | 74,842,425  | 0.001574 | -0.205 | -0.171 |  |  |     | <i>P4HA1</i>    | 5'UTR   |
| cg09324663 | 6  | 41,621,232  | 2.83E-18 | -0.205 | -0.207 |  |  |     | <i>MDFI</i>     | Body    |
| cg12025690 | 13 | 107,991,871 | 0.030867 | -0.205 | -0.114 |  |  |     | <i>FAM155A</i>  | Body    |
| cg12413346 | 15 | 43,425,285  | 5.83E-08 | -0.205 | -0.219 |  |  |     | <i>TMEM62</i>   | TSS1500 |
| cg01597784 | 2  | 89,986,470  | 5.94E-05 | -0.205 | -0.185 |  |  |     |                 |         |
| cg10911747 | 4  | 15,171,497  | 0.003591 | -0.205 | -0.127 |  |  |     |                 |         |
| cg00163727 | 6  | 98,989,775  | 0.033928 | -0.205 | -0.127 |  |  |     |                 |         |
| cg00778084 | 1  | 173,681,595 | 0.01725  | -0.205 | -0.099 |  |  |     |                 |         |
| cg03815116 | 4  | 44,654,206  | 0.004712 | -0.205 | -0.177 |  |  |     | <i>YIPF7</i>    | TSS1500 |
| cg13990848 | 9  | 93,883,110  | 9.02E-07 | -0.205 | -0.205 |  |  |     |                 |         |
| cg20168964 | 12 | 130,333,393 | 0.001464 | -0.205 | -0.222 |  |  |     | <i>TMEM132D</i> | Body    |
| cg15444358 | 14 | 102,051,071 | 0.041775 | -0.205 | -0.168 |  |  |     |                 |         |

|             |    |             |          |        |        |            |        |     |                 |         |
|-------------|----|-------------|----------|--------|--------|------------|--------|-----|-----------------|---------|
| cg23604959  | X  | 153,283,694 | 0.000167 | -0.205 | -0.164 |            |        |     | <i>IRAK1</i>    | Body    |
| cg03654169  | 8  | 11,710,911  | 1.71E-05 | -0.205 | -0.168 |            |        |     | <i>CTSB</i>     | Body    |
| cg24531714  | 8  | 67,475,459  | 0.000921 | -0.205 | -0.181 |            |        |     | <i>MYBL1</i>    | 3'UTR   |
| cg02039214  | 15 | 88,521,695  | 0.01039  | -0.205 | -0.160 |            |        |     | <i>NTRK3</i>    | Body    |
| cg15983538  | 1  | 156,123,411 | 7.9E-05  | -0.205 | -0.205 | 7.62E-07   | -0.081 |     | <i>SEMA4A</i>   | 5'UTR   |
| cg25605731  | 19 | 13,054,434  | 0.005867 | -0.205 | -0.164 |            |        |     | <i>CALR</i>     | Body    |
| cg27501612  | 16 | 56,977,363  | 0.000727 | -0.205 | -0.200 |            |        |     | <i>HERPUD1</i>  | 3'UTR   |
| cg15405588  | 13 | 33,854,227  | 0.002999 | -0.205 | -0.169 |            |        |     | <i>STARD13</i>  | Body    |
| cg06079062  | 3  | 108,672,412 | 0.005318 | -0.205 | -0.158 |            |        |     | <i>GUCA1C</i>   | 1stExon |
| cg23225508  | 17 | 62,500,377  | 8.37E-11 | -0.205 | -0.182 |            |        |     | <i>DDX5</i>     | Body    |
| cg16249827  | 19 | 11,153,168  | 1.15E-06 | -0.205 | -0.201 |            |        |     | <i>SMARCA4</i>  | Body    |
| cg00915830  | 12 | 34,448,653  | 0.006073 | -0.205 | -0.140 |            |        |     |                 |         |
| cg09940861  | 14 | 101,201,649 | 0.024954 | -0.205 | -0.122 |            |        |     |                 |         |
| cg23920120  | 11 | 122,239,845 | 0.002101 | -0.205 | -0.188 |            |        |     |                 |         |
| cg18695670  | 14 | 61,123,667  | 3.02E-13 | -0.205 | -0.175 |            |        |     |                 |         |
| cg25503323  | 7  | 36,567,098  | 0.004614 | -0.205 | -0.148 |            |        |     | <i>AOAH</i>     | Body    |
| cg15379170  | 2  | 233,476,236 | 1.46E-09 | -0.205 | -0.172 |            |        |     | <i>EFHD1</i>    | Body    |
| cg16564358  | 16 | 85,912,452  | 0.028864 | -0.205 | -0.111 |            |        |     |                 |         |
| cg00861695  | 13 | 24,736,455  | 0.00011  | -0.205 | -0.177 |            |        |     | <i>SPATA13</i>  | 5'UTR   |
| cg06183336  | 13 | 112,196,813 | 0.009635 | -0.205 | -0.082 |            |        |     |                 |         |
| cg23201841  | 1  | 205,602,113 | 2.18E-09 | -0.205 | -0.203 |            |        |     | <i>ELK4</i>     | TSS200  |
| cg24897320  | 1  | 110,042,528 | 9.47E-08 | -0.205 | -0.177 |            |        |     | <i>CYB561D1</i> | 3'UTR   |
| cg15214183  | 11 | 67,232,269  | 1.56E-06 | -0.205 | -0.178 |            |        |     | <i>TMEM134</i>  | Body    |
| cg13933535  | X  | 96,795,331  | 6.96E-10 | -0.205 | -0.207 |            |        |     | <i>DIAPH2</i>   | Body    |
| cg10351740  | 7  | 38,470,121  | 0.027991 | -0.205 | -0.208 |            |        |     | <i>AMPH</i>     | Body    |
| cg20318358  | 12 | 108,167,448 | 3.2E-05  | -0.205 | -0.200 |            |        |     | <i>ASCL4</i>    | TSS1500 |
| cg111108702 | 11 | 67,432,681  | 0.047632 | -0.205 | -0.102 |            |        |     | <i>ALDH3B2</i>  | Body    |
| cg21226735  | 9  | 92,807,111  | 0.000205 | -0.205 | -0.229 |            |        |     |                 |         |
| cg02707593  | 5  | 54,823,369  | 0.001048 | -0.205 | -0.204 |            |        | Yes | <i>PPAP2A</i>   | Body    |
| cg03533858  | 1  | 2,324,396   | 1.24E-07 | -0.205 | -0.213 | 1.2E-16    | -0.223 |     | <i>MORN1</i>    | TSS1500 |
| cg03670994  | 5  | 6,182,647   | 0.002211 | -0.205 | -0.186 |            |        |     |                 |         |
| cg09086416  | 6  | 50,428,999  | 0.002233 | -0.205 | -0.192 |            |        |     |                 |         |
| cg06778853  | 1  | 6,672,620   | 8.13E-15 | -0.205 | -0.209 | 0.00000887 | -0.062 |     | <i>PHF13</i>    | TSS1500 |
| cg22848704  | 1  | 48,648,439  | 0.000432 | -0.205 | -0.191 |            |        |     | <i>SKINTL</i>   | TSS1500 |

|            |    |             |          |        |        |  |  |  |                  |         |
|------------|----|-------------|----------|--------|--------|--|--|--|------------------|---------|
| cg23494863 | 8  | 38,009,476  | 1.05E-06 | -0.205 | -0.194 |  |  |  | <i>STAR</i>      | TSS1500 |
| cg24467337 | 20 | 31,262,314  | 0.000919 | -0.205 | -0.179 |  |  |  | <i>LOC284805</i> | TSS1500 |
| cg05168215 | 12 | 18,433,545  | 0.019246 | -0.205 | -0.149 |  |  |  | <i>PIK3C2G</i>   | 5'UTR   |
| cg13260377 | 6  | 31,592,983  | 0.000562 | -0.205 | -0.201 |  |  |  | <i>BAT2</i>      | Body    |
| cg14848461 | 3  | 74,060,982  | 2.83E-07 | -0.205 | -0.188 |  |  |  |                  |         |
| cg17477990 | 1  | 144,937,317 | 9.72E-06 | -0.205 | -0.208 |  |  |  | <i>PDE4DIP</i>   | Body    |
| cg20157097 | 10 | 6,569,802   | 0.010777 | -0.205 | -0.133 |  |  |  | <i>PRKCQ</i>     | 5'UTR   |
| cg10690657 | 21 | 15,215,654  | 0.003676 | -0.205 | -0.151 |  |  |  | <i>C21orf15</i>  | Body    |
| cg06002305 | 5  | 178,591,479 | 0.036383 | -0.205 | -0.120 |  |  |  | <i>ADAMTS2</i>   | Body    |
| cg19618279 | 17 | 40,715,228  | 3.28E-14 | -0.205 | -0.193 |  |  |  | <i>COASY</i>     | 1stExon |
| cg02861926 | 19 | 56,348,742  | 1.7E-06  | -0.205 | -0.216 |  |  |  | <i>NLRP11</i>    | TSS1500 |
| cg21003380 | 1  | 156,261,207 | 1.17E-07 | -0.205 | -0.200 |  |  |  | <i>TMEM79</i>    | Body    |
| cg24872815 | 2  | 65,623,541  | 8.62E-10 | -0.205 | -0.209 |  |  |  | <i>SPRED2</i>    | Body    |
| cg25755428 | 19 | 13,875,111  | 0.03685  | -0.205 | -0.172 |  |  |  | <i>MRI1</i>      | TSS1500 |
| cg10946404 | 8  | 59,575,772  | 6.57E-06 | -0.205 | -0.217 |  |  |  |                  |         |
| cg15531099 | 1  | 152,770,502 | 2.04E-05 | -0.205 | -0.180 |  |  |  | <i>LCE1D</i>     | Body    |
| cg08382332 | 2  | 58,728,740  | 0.000953 | -0.205 | -0.148 |  |  |  |                  |         |
| cg14377739 | 9  | 139,699,037 | 5.79E-06 | -0.205 | -0.208 |  |  |  | <i>KIAA1984</i>  | Body    |
| cg08614769 | 6  | 1,679,393   | 4.2E-07  | -0.205 | -0.201 |  |  |  | <i>GMDS</i>      | Body    |
| cg12443030 | 1  | 75,565,024  | 0.002073 | -0.205 | -0.177 |  |  |  |                  |         |
| cg08478672 | 8  | 129,374,295 | 1.07E-08 | -0.205 | -0.189 |  |  |  |                  |         |
| cg16050028 | 17 | 6,068,454   | 0.038533 | -0.205 | -0.087 |  |  |  |                  |         |
| cg20519577 | 12 | 132,329,360 | 0.002584 | -0.205 | -0.077 |  |  |  | <i>MMP17</i>     | Body    |
| cg07596401 | 10 | 126,150,086 | 1.27E-07 | -0.205 | -0.188 |  |  |  | <i>LHPP</i>      | TSS1500 |
| cg08198470 | 17 | 1,801,637   | 1.8E-05  | -0.205 | -0.227 |  |  |  | <i>RPA1</i>      | 3'UTR   |
| cg19927661 | 6  | 3,150,267   | 0.003174 | -0.205 | -0.156 |  |  |  | <i>BPHL</i>      | Body    |
| cg00793946 | 2  | 46,163,986  | 4.1E-06  | -0.205 | -0.170 |  |  |  | <i>PRKCE</i>     | Body    |
| cg02018326 | 19 | 51,670,251  | 0.011346 | -0.205 | -0.175 |  |  |  | <i>SIGLECP3</i>  | TSS1500 |
| cg12667125 | 1  | 36,181,447  | 9.15E-17 | -0.205 | -0.187 |  |  |  | <i>C1orf216</i>  | Body    |
| cg17421561 | 7  | 31,726,639  | 0.034605 | -0.205 | -0.087 |  |  |  | <i>C7orf16</i>   | TSS200  |
| cg04984818 | 14 | 104,195,301 | 3.07E-05 | -0.205 | -0.205 |  |  |  | <i>ZFYVE21</i>   | Body    |
| cg12136883 | 4  | 120,613,606 | 0.025043 | -0.205 | -0.176 |  |  |  |                  |         |
| cg18010085 | 6  | 1,297,024   | 7.93E-06 | -0.205 | -0.191 |  |  |  |                  |         |
| cg26738530 | 15 | 71,581,059  | 5.91E-05 | -0.205 | -0.162 |  |  |  | <i>THSD4</i>     | Body    |

|            |    |             |          |        |        |  |  |  |                 |         |
|------------|----|-------------|----------|--------|--------|--|--|--|-----------------|---------|
| cg02034204 | 1  | 8,394,077   | 0.005437 | -0.205 | -0.119 |  |  |  | <i>SLC45A1</i>  | Body    |
| cg11481675 | 8  | 32,504,965  | 0.002067 | -0.205 | -0.188 |  |  |  | <i>NRG1</i>     | Body    |
| cg17294330 | 17 | 77,089,070  | 0.007163 | -0.205 | -0.092 |  |  |  | <i>HRNBP3</i>   | Body    |
| cg18898325 | 22 | 42,394,382  | 0.003997 | -0.205 | -0.235 |  |  |  | <i>WBP2NL</i>   | TSS1500 |
| cg27534624 | 12 | 7,072,727   | 0.000555 | -0.205 | -0.190 |  |  |  | <i>MIR141</i>   | TSS1500 |
| cg23082003 | 13 | 21,713,913  | 2.1E-05  | -0.205 | -0.190 |  |  |  | <i>SAP18</i>    | TSS1500 |
| cg26751513 | 16 | 1,542,910   | 0.000498 | -0.205 | -0.186 |  |  |  | <i>TELO2</i>    | TSS1500 |
| cg01502919 | 6  | 124,122,318 | 0.000195 | -0.205 | -0.195 |  |  |  |                 |         |
| cg16580616 | 1  | 235,256,519 | 0.044793 | -0.205 | -0.176 |  |  |  |                 |         |
| cg23557769 | 22 | 16,871,766  | 0.003151 | -0.205 | -0.160 |  |  |  |                 |         |
| cg09631495 | 8  | 4,617,087   | 0.011384 | -0.205 | -0.186 |  |  |  | <i>CSMD1</i>    | Body    |
| cg11154040 | 4  | 3,795,063   | 0.044281 | -0.205 | -0.122 |  |  |  |                 |         |
| cg21996360 | 1  | 215,940,809 | 0.0303   | -0.205 | -0.118 |  |  |  | <i>USH2A</i>    | Body    |
| cg00607609 | 4  | 119,962,922 | 1.25E-07 | -0.205 | -0.171 |  |  |  | <i>SYNPO2</i>   | Body    |
| cg05082563 | 7  | 137,775,882 | 0.002207 | -0.205 | -0.094 |  |  |  | <i>AKR1D1</i>   | Body    |
| cg19788754 | 17 | 80,847,662  | 0.00011  | -0.205 | -0.203 |  |  |  | <i>TBCD</i>     | Body    |
| cg24324837 | 19 | 49,891,574  | 0.023378 | -0.205 | -0.265 |  |  |  | <i>CCDC155</i>  | 1stExon |
| cg02973354 | 14 | 70,316,670  | 0.011478 | -0.205 | -0.081 |  |  |  |                 |         |
| cg27445072 | 16 | 82,921,787  | 0.016333 | -0.205 | -0.198 |  |  |  | <i>CDH13</i>    | Body    |
| cg27431625 | 2  | 107,679,531 | 3.42E-05 | -0.206 | -0.145 |  |  |  |                 |         |
| cg15795186 | 4  | 58,291,839  | 0.024291 | -0.206 | -0.120 |  |  |  |                 |         |
| cg04687551 | 12 | 129,187,286 | 0.030402 | -0.206 | -0.170 |  |  |  | <i>TMEM132C</i> | Body    |
| cg12976310 | X  | 113,865,129 | 0.017398 | -0.206 | -0.260 |  |  |  | <i>SNORA35</i>  | TSS200  |
| cg19611822 | 15 | 96,101,553  | 1.25E-05 | -0.206 | -0.222 |  |  |  |                 |         |
| cg00159764 | 20 | 35,059,674  | 0.001789 | -0.206 | -0.153 |  |  |  | <i>DLGAP4</i>   | 5'UTR   |
| cg04121368 | 10 | 122,316,088 | 0.038563 | -0.206 | -0.216 |  |  |  | <i>PPAPDC1A</i> | Body    |
| cg16444826 | 2  | 30,441,244  | 3.52E-05 | -0.206 | -0.204 |  |  |  |                 |         |
| cg05070250 | 11 | 36,620,199  | 0.004925 | -0.206 | -0.106 |  |  |  | <i>C11orf74</i> | 5'UTR   |
| cg11152263 | 7  | 569,642     | 0.010644 | -0.206 | -0.163 |  |  |  |                 |         |
| cg26995656 | 14 | 88,121,644  | 0.016378 | -0.206 | -0.139 |  |  |  |                 |         |
| cg02281821 | 10 | 129,692,341 | 1.12E-09 | -0.206 | -0.215 |  |  |  | <i>CLRN3</i>    | TSS1500 |
| cg01566170 | 1  | 223,899,746 | 0.000347 | -0.206 | -0.147 |  |  |  | <i>CAPN2</i>    | TSS1500 |
| cg23010693 | 14 | 103,911,341 | 5.54E-06 | -0.206 | -0.182 |  |  |  | <i>MARK3</i>    | Body    |
| cg04741728 | 12 | 133,003,907 | 0.013067 | -0.206 | -0.228 |  |  |  |                 |         |

|            |    |             |          |        |        |          |        |     |                  |         |
|------------|----|-------------|----------|--------|--------|----------|--------|-----|------------------|---------|
| cg09328012 | 22 | 46,481,677  | 2.19E-07 | -0.206 | -0.179 |          |        |     | <i>LOC400931</i> | TSS200  |
| cg16924061 | 18 | 71,955,528  | 7.74E-05 | -0.206 | -0.182 |          |        |     | <i>CYB5A</i>     | Body    |
| cg26813137 | 5  | 151,784,326 | 0.025026 | -0.206 | -0.239 |          |        |     | <i>NMUR2</i>     | 1stExon |
| cg11793422 | 19 | 15,239,169  | 1.36E-06 | -0.206 | -0.203 |          |        |     |                  |         |
| cg17723122 | 1  | 205,641,542 | 3.11E-12 | -0.206 | -0.198 |          |        |     | <i>SLC45A3</i>   | 5'UTR   |
| cg14883135 | 2  | 43,051,175  | 0.000386 | -0.206 | -0.178 |          |        | Yes |                  |         |
| cg13377341 | 6  | 41,715,281  | 0.000553 | -0.206 | -0.202 |          |        |     | <i>PGC</i>       | TSS200  |
| cg14467464 | 17 | 7,960,406   | 0.000262 | -0.206 | -0.178 |          |        |     |                  |         |
| cg18140889 | 1  | 153,177,577 | 0.000371 | -0.206 | -0.198 |          |        |     | <i>LELP1</i>     | 3'UTR   |
| cg01126560 | 9  | 139,886,304 | 9.22E-07 | -0.206 | -0.205 | 1.19E-12 | -0.103 |     | <i>C9orf142</i>  | TSS1500 |
| cg16863332 | 10 | 64,566,678  | 9.05E-07 | -0.206 | -0.217 |          |        |     | <i>ADO</i>       | 3'UTR   |
| cg23781075 | 20 | 170,581     | 0.000127 | -0.206 | -0.155 |          |        |     | <i>DEFB128</i>   | TSS1500 |
| cg09365529 | 1  | 75,140,289  | 0.013312 | -0.206 | -0.101 |          |        |     | <i>C1orf173</i>  | TSS1500 |
| cg26652266 | 10 | 90,932,152  | 0.029146 | -0.206 | -0.111 |          |        |     |                  |         |
| cg00961325 | 7  | 41,547,329  | 1.25E-07 | -0.206 | -0.198 |          |        |     |                  |         |
| cg11365072 | 5  | 154,392,274 | 0.000277 | -0.206 | -0.185 |          |        |     | <i>KIF4B</i>     | TSS1500 |
| cg10449558 | 17 | 70,552,917  | 0.000197 | -0.206 | -0.137 |          |        |     |                  |         |
| cg00225006 | 15 | 83,477,872  | 6.13E-06 | -0.206 | -0.221 |          |        |     | <i>WHAMM</i>     | TSS200  |
| cg05418395 | 2  | 58,689,455  | 0.040814 | -0.206 | -0.101 |          |        |     |                  |         |
| cg26175729 | 7  | 150,726,136 | 3.95E-12 | -0.206 | -0.211 |          |        |     | <i>ABCB8</i>     | Body    |
| cg26898869 | 8  | 56,364,964  | 0.017806 | -0.206 | -0.169 |          |        |     | <i>XKR4</i>      | Body    |
| cg14016200 | 19 | 10,399,157  | 0.005532 | -0.206 | -0.173 |          |        |     | <i>ICAM5</i>     | TSS1500 |
| cg02475600 | 12 | 34,503,594  | 0.013755 | -0.206 | -0.159 |          |        |     |                  |         |
| cg08008692 | 1  | 159,961,591 | 0.000336 | -0.206 | -0.185 |          |        |     |                  |         |
| cg15746620 | 19 | 14,785,849  | 5.1E-10  | -0.206 | -0.195 | 1.5E-13  | -0.173 |     | <i>EMR3</i>      | TSS200  |
| cg19284751 | 2  | 119,699,789 | 0.003808 | -0.206 | -0.220 |          |        |     | <i>MARCO</i>     | 1stExon |
| cg03197032 | 15 | 36,708,407  | 0.007228 | -0.206 | -0.307 |          |        |     |                  |         |
| cg14381543 | 9  | 93,798,720  | 0.003684 | -0.206 | -0.227 |          |        |     |                  |         |
| cg19190519 | 11 | 123,175,740 | 0.015824 | -0.206 | -0.126 |          |        |     |                  |         |
| cg05582397 | 12 | 8,674,684   | 0.001916 | -0.206 | -0.166 |          |        |     | <i>CLEC4D</i>    | 3'UTR   |
| cg15896624 | 4  | 164,246,900 | 0.018899 | -0.206 | -0.138 |          |        |     | <i>NPY1R</i>     | Body    |
| cg02344361 | 10 | 134,806,481 | 2.76E-05 | -0.206 | -0.195 |          |        |     |                  |         |
| cg20424036 | 8  | 32,777,053  | 0.006367 | -0.206 | -0.123 |          |        |     |                  |         |
| cg02103822 | 1  | 147,246,329 | 0.004602 | -0.206 | -0.132 |          |        |     | <i>GJA5</i>      | TSS1500 |

|            |    |             |          |        |        |            |        |     |                  |         |
|------------|----|-------------|----------|--------|--------|------------|--------|-----|------------------|---------|
| cg10153214 | 16 | 71,571,146  | 3.01E-05 | -0.206 | -0.143 |            |        |     | <i>CHST4</i>     | Body    |
| cg10803722 | 21 | 46,713,166  | 0.000532 | -0.206 | -0.131 |            |        |     | <i>LOC642852</i> | Body    |
| cg15669228 | 9  | 21,409,505  | 0.048344 | -0.206 | -0.139 | 3.15E-07   | -0.155 |     | <i>IFNA8</i>     | 1stExon |
| cg22288927 | 4  | 144,482,688 | 2.2E-06  | -0.206 | -0.211 |            |        |     |                  |         |
| cg00126657 | X  | 47,967,250  | 0.004131 | -0.206 | -0.144 | 6.75E-12   | -0.138 |     | <i>SSX6</i>      | TSS200  |
| cg12043732 | 20 | 61,284,223  | 1E-19    | -0.206 | -0.180 |            |        |     | <i>SLCO4A1</i>   | 5'UTR   |
| cg20140940 | 1  | 241,390,013 | 0.024876 | -0.206 | -0.239 |            |        |     | <i>RGS7</i>      | Body    |
| cg26561254 | 15 | 89,164,044  | 5.56E-09 | -0.206 | -0.199 | 4.74E-09   | -0.075 |     | <i>AEN</i>       | TSS1500 |
| cg11371706 | 10 | 117,817,578 | 0.048447 | -0.206 | -0.123 |            |        |     | <i>GFRA1</i>     | 3'UTR   |
| cg19270309 | 17 | 77,712,853  | 0.000457 | -0.206 | -0.181 |            |        |     | <i>ENPP7</i>     | 3'UTR   |
| cg07696099 | 8  | 133,573,809 | 0.000138 | -0.206 | -0.208 |            |        |     | <i>HPYR1</i>     | TSS200  |
| cg02608124 | 11 | 18,193,422  | 0.002653 | -0.206 | -0.132 |            |        |     | <i>MRGPRX4</i>   | TSS1500 |
| cg06853230 | 7  | 57,832,834  | 0.010283 | -0.206 | -0.185 |            |        |     |                  |         |
| cg12030523 | 5  | 126,984,765 | 1.08E-06 | -0.206 | -0.202 |            |        |     | <i>CTXN3</i>     | 1stExon |
| cg18890615 | 13 | 112,161,629 | 0.009452 | -0.206 | -0.164 |            |        | Yes |                  |         |
| cg20025677 | 6  | 44,217,736  | 8.33E-05 | -0.206 | -0.166 |            |        |     | <i>HSP90AB1</i>  | Body    |
| cg00231085 | 5  | 1,773,166   | 0.001474 | -0.206 | -0.168 |            |        |     |                  |         |
| cg13441891 | 16 | 85,648,370  | 1.53E-05 | -0.206 | -0.194 |            |        |     | <i>KIAA0182</i>  | 5'UTR   |
| cg05008296 | 14 | 68,163,792  | 4.24E-06 | -0.206 | -0.197 |            |        |     | <i>RDH11</i>     | TSS1500 |
| cg19511425 | X  | 13,749,859  | 5.48E-06 | -0.206 | -0.195 |            |        |     | <i>TRAPPC2</i>   | 5'UTR   |
| cg02835977 | 1  | 37,782,729  | 0.027638 | -0.206 | -0.130 |            |        |     |                  |         |
| cg02658528 | 13 | 113,689,139 | 7.02E-06 | -0.206 | -0.165 |            |        |     | <i>MCF2L</i>     | Body    |
| cg03538079 | 7  | 34,874,196  | 0.008301 | -0.206 | -0.175 |            |        |     | <i>AAA1</i>      | TSS1500 |
| cg05553829 | 8  | 57,307,649  | 0.000264 | -0.206 | -0.209 |            |        |     | <i>SDR16C6</i>   | 1stExon |
| cg24459209 | 11 | 57,148,215  | 7.4E-05  | -0.206 | -0.244 | 0.00807386 | -0.065 |     | <i>PRG3</i>      | 5'UTR   |
| cg07664312 | 12 | 18,433,550  | 0.014345 | -0.206 | -0.164 |            |        |     | <i>PIK3C2G</i>   | 5'UTR   |
| cg23949925 | 11 | 68,147,880  | 4.79E-07 | -0.206 | -0.167 |            |        |     | <i>LRP5</i>      | Body    |
| cg22416002 | 22 | 39,713,062  | 2.11E-09 | -0.206 | -0.182 |            |        |     | <i>RPL3</i>      | Body    |
| cg04479876 | 5  | 38,479,736  | 0.003226 | -0.206 | -0.187 |            |        |     | <i>LIFR</i>      | 3'UTR   |
| cg20868817 | 1  | 160,677,398 | 0.000785 | -0.206 | -0.188 |            |        |     | <i>CD48</i>      | Body    |
| cg21691065 | 1  | 2,804,835   | 0.00603  | -0.206 | -0.139 |            |        |     |                  |         |
| cg20619751 | 13 | 114,092,131 | 8.35E-08 | -0.206 | -0.181 |            |        |     | <i>ADPRHL1</i>   | Body    |
| cg02022322 | 12 | 109,576,193 | 0.022782 | -0.206 | -0.113 |            |        |     | <i>ACACB</i>     | TSS1500 |
| cg21293933 | 20 | 42,539,946  | 1.25E-05 | -0.206 | -0.192 |            |        |     |                  |         |

|            |    |             |          |        |        |          |        |     |                 |         |
|------------|----|-------------|----------|--------|--------|----------|--------|-----|-----------------|---------|
| cg21730821 | X  | 100,717,965 | 0.019894 | -0.206 | -0.222 |          |        |     | <i>ARMCX4</i>   | Body    |
| cg25073998 | 2  | 47,492,481  | 0.001275 | -0.206 | -0.192 |          |        |     |                 |         |
| cg26131315 | 4  | 140,787,316 | 1.36E-07 | -0.206 | -0.201 |          |        |     | <i>MAML3</i>    | Body    |
| cg23108559 | 14 | 55,491,009  | 0.021905 | -0.206 | -0.216 |          |        |     | <i>WDHD1</i>    | 5'UTR   |
| cg07897871 | 1  | 201,979,846 | 9.47E-05 | -0.206 | -0.204 |          |        |     | <i>ELF3</i>     | 5'UTR   |
| cg06321300 | 1  | 104,239,696 | 0.031932 | -0.206 | -0.097 |          |        |     | <i>AMY1B</i>    | TSS1500 |
| cg26277069 | 10 | 19,352,926  | 0.002507 | -0.206 | -0.124 |          |        |     |                 |         |
| cg12300018 | 8  | 63,903,574  | 0.048008 | -0.206 | -0.157 |          |        |     | <i>NKAIN3</i>   | 3'UTR   |
| cg12611448 | 3  | 185,255,217 | 5.77E-10 | -0.206 | -0.203 |          |        |     | <i>LIPH</i>     | Body    |
| cg19045344 | X  | 84,364,350  | 0.030174 | -0.206 | -0.107 |          |        |     | <i>SATL1</i>    | TSS1500 |
| cg00111778 | 2  | 3,833,127   | 5.99E-08 | -0.206 | -0.213 |          |        |     |                 |         |
| cg07625619 | 16 | 69,050,940  | 3.1E-05  | -0.206 | -0.196 |          |        |     | <i>TMCO7</i>    | Body    |
| cg10987788 | 11 | 34,535,377  | 0.009252 | -0.206 | -0.207 |          |        |     | <i>ELF5</i>     | TSS200  |
| cg21568141 | 6  | 169,235,962 | 9.93E-05 | -0.206 | -0.101 |          |        |     |                 |         |
| cg18884447 | 14 | 105,018,912 | 0.003779 | -0.206 | -0.080 |          |        |     |                 |         |
| cg05924537 | 3  | 169,588,423 | 0.014169 | -0.206 | -0.297 |          |        |     | <i>LRRC31</i>   | TSS1500 |
| cg23735602 | 3  | 178,276,672 | 2.97E-05 | -0.206 | -0.222 |          |        |     | <i>KCNMB2</i>   | 5'UTR   |
| cg01241450 | 1  | 3,110,867   | 0.043481 | -0.206 | -0.049 |          |        |     | <i>PRDM16</i>   | Body    |
| cg04456892 | 11 | 6,898,245   | 0.038728 | -0.206 | -0.234 |          |        |     | <i>OR10A4</i>   | 1stExon |
| cg07612300 | 2  | 242,033,426 | 1.59E-05 | -0.206 | -0.200 |          |        |     | <i>MTERFD2</i>  | Body    |
| cg03574946 | 4  | 65,723,509  | 0.016598 | -0.206 | -0.143 |          |        |     |                 |         |
| cg22512041 | 2  | 22,504,250  | 0.001193 | -0.206 | -0.133 |          |        |     |                 |         |
| cg22759185 | 19 | 1,492,038   | 7.7E-06  | -0.206 | -0.230 | 4.88E-23 | -0.158 |     | <i>REEP6</i>    | Body    |
| cg06758484 | 10 | 109,671,761 | 0.019569 | -0.207 | -0.160 |          |        |     |                 |         |
| cg07340894 | 8  | 8,238,774   | 0.002987 | -0.207 | -0.204 |          |        |     | <i>PRAGMIN</i>  | Body    |
| cg00095629 | 6  | 168,811,070 | 0.002028 | -0.207 | -0.179 |          |        |     |                 |         |
| cg14852603 | 6  | 164,585,948 | 0.026176 | -0.207 | -0.197 |          |        |     |                 |         |
| cg18934443 | 7  | 149,569,776 | 1.94E-06 | -0.207 | -0.220 |          |        |     | <i>ATP6VOE2</i> | TSS1500 |
| cg20900312 | 14 | 77,670,584  | 7.05E-06 | -0.207 | -0.221 |          |        |     | <i>TMEM63C</i>  | 5'UTR   |
| cg16974699 | 22 | 20,858,742  | 1.23E-07 | -0.207 | -0.167 |          |        |     |                 |         |
| cg16928869 | 20 | 60,397,766  | 0.023876 | -0.207 | -0.135 |          |        | Yes | <i>CDH4</i>     | Body    |
| cg24750674 | 17 | 79,097,243  | 0.029145 | -0.207 | -0.168 |          |        |     | <i>AATK</i>     | Body    |
| cg05134325 | 13 | 52,423,122  | 2.07E-05 | -0.207 | -0.194 |          |        |     |                 |         |
| cg27118080 | 6  | 159,618,364 | 0.000623 | -0.207 | -0.222 |          |        |     | <i>FNDC1</i>    | Body    |



|            |    |             |          |        |        |            |        |     |                |         |
|------------|----|-------------|----------|--------|--------|------------|--------|-----|----------------|---------|
| cg02760280 | 1  | 21,993,555  | 0.001451 | -0.207 | -0.210 |            |        |     | <i>RAP1GAP</i> | 5'UTR   |
| cg07804658 | 5  | 100,108,624 | 0.00276  | -0.207 | -0.222 |            |        |     |                |         |
| cg17815049 | 1  | 246,728,663 | 1.6E-08  | -0.207 | -0.176 |            |        |     | <i>CNST</i>    | TSS1500 |
| cg06852395 | 17 | 7,478,131   | 2.09E-09 | -0.207 | -0.177 |            |        |     | <i>EIF4A1</i>  | Body    |
| cg13621396 | 4  | 26,861,261  | 0.000132 | -0.207 | -0.195 |            |        |     | <i>STIM2</i>   | TSS1500 |
| cg10391102 | 1  | 3,206,316   | 0.008536 | -0.207 | -0.104 |            |        |     | <i>PRDM16</i>  | Body    |
| cg27312242 | 15 | 50,116,359  | 1.21E-05 | -0.207 | -0.219 |            |        |     |                |         |
| cg15042473 | X  | 103,294,786 | 0.012849 | -0.207 | -0.149 |            |        |     | <i>H2BFM</i>   | 1stExon |
| cg23995738 | 15 | 102,308,058 | 1.04E-05 | -0.207 | -0.142 |            |        |     |                |         |
| cg06497051 | 1  | 156,261,200 | 1.59E-08 | -0.207 | -0.183 |            |        |     | <i>TMEM79</i>  | Body    |
| cg24494262 | 4  | 155,339,844 | 0.000332 | -0.207 | -0.106 |            |        |     | <i>DCHS2</i>   | Body    |
| cg24950067 | 21 | 43,406,941  | 8.59E-05 | -0.207 | -0.150 |            |        |     | <i>ZNF295</i>  | 3'UTR   |
| cg13616190 | 8  | 88,041,484  | 0.022324 | -0.207 | -0.177 |            |        |     | <i>CNBD1</i>   | Body    |
| cg27312652 | 21 | 38,073,517  | 5.63E-06 | -0.207 | -0.201 |            |        |     | <i>SIM2</i>    | Body    |
| cg13765621 | 1  | 158,149,228 | 2.79E-05 | -0.207 | -0.172 | 1.17E-15   | -0.179 |     | <i>CD1D</i>    | TSS1500 |
| cg12069151 | 6  | 30,580,546  | 9.92E-05 | -0.207 | -0.176 |            |        |     | <i>PPP1R10</i> | 5'UTR   |
| cg09473585 | 3  | 62,305,519  | 0.000145 | -0.207 | -0.208 | 0.00014063 | -0.104 |     | <i>C3orf14</i> | 5'UTR   |
| cg06572974 | 15 | 93,442,219  | 0.002355 | -0.207 | -0.196 | 8.1E-08    | -0.134 |     | <i>CHD2</i>    | TSS1500 |
| cg23817132 | 13 | 56,790,593  | 0.007435 | -0.207 | -0.141 |            |        |     |                |         |
| cg27139836 | 2  | 219,868,065 | 0.039299 | -0.207 | -0.212 |            |        |     | <i>CCDC108</i> | Body    |
| cg07282879 | 11 | 49,843,431  | 1.6E-05  | -0.207 | -0.194 |            |        |     |                |         |
| cg02441982 | 17 | 76,183,641  | 4.1E-05  | -0.207 | -0.183 |            |        |     | <i>AFMID</i>   | Body    |
| cg04587424 | 2  | 776,719     | 1.15E-12 | -0.207 | -0.198 |            |        |     |                |         |
| cg03527802 | 16 | 29,819,931  | 7.52E-21 | -0.207 | -0.197 |            |        |     | <i>MAZ</i>     | Body    |
| cg04117590 | 3  | 139,346,788 | 2.17E-06 | -0.207 | -0.184 |            |        |     | <i>NMNAT3</i>  | 5'UTR   |
| cg06526622 | 2  | 196,458,613 | 0.01735  | -0.207 | -0.182 |            |        |     |                |         |
| cg11841867 | 18 | 11,153,912  | 1.37E-06 | -0.207 | -0.201 |            |        |     |                |         |
| cg15335683 | 11 | 66,465,299  | 0.001356 | -0.207 | -0.186 |            |        | Yes | <i>SPTBN2</i>  | Body    |
| cg23709855 | 14 | 21,927,732  | 0.000445 | -0.207 | -0.169 |            |        |     | <i>RAB2B</i>   | Body    |
| cg03901431 | 16 | 85,517,684  | 6.76E-06 | -0.207 | -0.140 |            |        |     |                |         |
| cg19539385 | 7  | 6,095,195   | 1.41E-05 | -0.207 | -0.212 |            |        |     | <i>EIF2AK1</i> | Body    |
| cg25002350 | 15 | 94,771,562  | 3.59E-06 | -0.207 | -0.196 |            |        |     |                |         |
| cg03310594 | 7  | 22,704,316  | 0.001229 | -0.207 | -0.156 |            |        |     |                |         |
| cg11323828 | 15 | 41,230,578  | 3.7E-09  | -0.207 | -0.186 |            |        |     | <i>DLL4</i>    | 3'UTR   |

|            |    |             |          |        |        |  |  |  |                   |         |
|------------|----|-------------|----------|--------|--------|--|--|--|-------------------|---------|
| cg15714227 | 5  | 2,225,482   | 0.003351 | -0.207 | -0.255 |  |  |  |                   |         |
| cg03815683 | 16 | 61,897,489  | 0.044424 | -0.207 | -0.100 |  |  |  | <i>CDH8</i>       | Body    |
| cg13692426 | 9  | 79,625,269  | 6.03E-06 | -0.207 | -0.191 |  |  |  |                   |         |
| cg02662170 | 10 | 133,508,385 | 0.035142 | -0.207 | -0.102 |  |  |  |                   |         |
| cg08448341 | 6  | 134,324,873 | 2.92E-05 | -0.207 | -0.223 |  |  |  | <i>SLC2A12</i>    | Body    |
| cg21902964 | 14 | 101,198,397 | 0.019463 | -0.207 | -0.103 |  |  |  | <i>DLK1</i>       | Body    |
| cg04094548 | 1  | 39,301,897  | 0.00761  | -0.207 | -0.123 |  |  |  |                   |         |
| cg14492992 | 15 | 53,101,548  | 0.014897 | -0.207 | -0.209 |  |  |  |                   |         |
| cg24849831 | 17 | 17,389,971  | 0.003312 | -0.207 | -0.122 |  |  |  | <i>MED9</i>       | Body    |
| cg06036459 | 18 | 75,884,536  | 0.035927 | -0.207 | -0.091 |  |  |  |                   |         |
| cg12911556 | 7  | 26,403,780  | 8.41E-06 | -0.207 | -0.208 |  |  |  | <i>SNX10</i>      | Body    |
| cg15778089 | 3  | 35,721,037  | 0.049972 | -0.207 | -0.169 |  |  |  | <i>ARPP-21</i>    | 5'UTR   |
| cg02050028 | 7  | 43,156,037  | 0.00855  | -0.207 | -0.139 |  |  |  | <i>HECW1</i>      | 5'UTR   |
| cg00862016 | 3  | 13,859,125  | 0.026007 | -0.207 | -0.164 |  |  |  |                   |         |
| cg01449973 | 16 | 87,027,662  | 0.046494 | -0.207 | -0.084 |  |  |  |                   |         |
| cg01799015 | 19 | 707,791     | 1.23E-08 | -0.207 | -0.200 |  |  |  | <i>PALM</i>       | TSS1500 |
| cg04170298 | 15 | 86,805,563  | 9.87E-05 | -0.207 | -0.196 |  |  |  | <i>AGBL1</i>      | Body    |
| cg06538345 | 19 | 49,993,186  | 2.04E-06 | -0.207 | -0.206 |  |  |  | <i>RPL13AP5</i>   | Body    |
| cg25963412 | 4  | 8,412,369   | 0.003491 | -0.207 | -0.174 |  |  |  | <i>ACOX3</i>      | Body    |
| cg20128319 | 2  | 97,174,815  | 1.21E-05 | -0.207 | -0.154 |  |  |  | <i>NEURL3</i>     | TSS1500 |
| cg27156515 | 11 | 9,879,023   | 7.36E-06 | -0.207 | -0.207 |  |  |  | <i>SBF2</i>       | Body    |
| cg11186224 | 6  | 132,859,485 | 0.003204 | -0.207 | -0.136 |  |  |  | <i>TAAR9</i>      | 1stExon |
| cg26654827 | 7  | 100,738,414 | 0.000268 | -0.207 | -0.128 |  |  |  |                   |         |
| cg17869851 | 1  | 230,976,414 | 0.001145 | -0.207 | -0.192 |  |  |  | <i>C1orf198</i>   | Body    |
| cg00574819 | 4  | 128,981,252 | 2.25E-06 | -0.207 | -0.209 |  |  |  | <i>LARP1B</i>     | TSS1500 |
| cg00150837 | 3  | 52,721,831  | 3.68E-08 | -0.207 | -0.207 |  |  |  | <i>GNL3</i>       | Body    |
| cg00871207 | 14 | 89,080,250  | 0.000114 | -0.207 | -0.195 |  |  |  |                   |         |
| cg18758405 | 10 | 107,451,306 | 3.27E-06 | -0.207 | -0.192 |  |  |  |                   |         |
| cg03514770 | 8  | 19,313,167  | 0.000745 | -0.207 | -0.207 |  |  |  | <i>CSGALNACT1</i> | Body    |
| cg18416585 | 4  | 62,756,100  | 0.041607 | -0.207 | -0.156 |  |  |  | <i>LPHN3</i>      | Body    |
| cg12273506 | 10 | 70,627,857  | 0.011551 | -0.207 | -0.160 |  |  |  | <i>STOX1</i>      | 5'UTR   |
| cg14933439 | 16 | 49,407,794  | 0.015736 | -0.207 | -0.209 |  |  |  | <i>C16orf78</i>   | TSS200  |
| cg14711592 | 1  | 157,839,587 | 0.008858 | -0.207 | -0.172 |  |  |  |                   |         |
| cg00592494 | X  | 75,249,222  | 0.022481 | -0.207 | -0.175 |  |  |  |                   |         |

|            |    |             |          |        |        |          |        |     |                  |         |
|------------|----|-------------|----------|--------|--------|----------|--------|-----|------------------|---------|
| cg12200188 | 7  | 111,496,282 | 0.0013   | -0.207 | -0.200 |          |        |     | <i>DOCK4</i>     | Body    |
| cg01115380 | 6  | 1,552,904   | 0.001051 | -0.207 | -0.102 |          |        |     |                  |         |
| cg11253879 | 1  | 3,664,522   | 2.6E-07  | -0.207 | -0.199 |          |        |     | <i>KIAA0495</i>  | TSS1500 |
| cg17488785 | X  | 140,009,093 | 0.016547 | -0.207 | -0.227 |          |        |     | <i>MIR320D2</i>  | TSS1500 |
| cg19386998 | 6  | 28,351,829  | 2.04E-05 | -0.207 | -0.126 |          |        |     | <i>ZSCAN12</i>   | Body    |
| cg03021100 | 3  | 31,542,063  | 0.007092 | -0.207 | -0.149 |          |        |     |                  |         |
| cg08269733 | 16 | 62,057,179  | 0.001535 | -0.207 | -0.116 |          |        |     | <i>CDH8</i>      | 5'UTR   |
| cg27280332 | 12 | 77,378,563  | 0.002857 | -0.207 | -0.217 |          |        |     |                  |         |
| cg25564800 | 3  | 122,234,134 | 4.63E-10 | -0.207 | -0.219 | 6.63E-15 | -0.070 |     | <i>KPNA1</i>     | TSS1500 |
| cg06818582 | 15 | 67,286,903  | 0.002416 | -0.207 | -0.174 |          |        |     |                  |         |
| cg11583392 | 7  | 103,087,458 | 2.32E-08 | -0.207 | -0.209 |          |        |     | <i>SLC26A5</i>   | TSS1500 |
| cg18560366 | 3  | 109,057,564 | 0.006342 | -0.207 | -0.155 |          |        |     | <i>DPPA4</i>     | TSS1500 |
| cg12349422 | 3  | 52,485,216  | 0.001787 | -0.207 | -0.106 |          |        |     | <i>TNNC1</i>     | 3'UTR   |
| cg14398214 | 17 | 56,493,260  | 0.000328 | -0.207 | -0.211 |          |        |     | <i>RNF43</i>     | 5'UTR   |
| cg03331924 | 1  | 208,038,413 | 3.03E-05 | -0.207 | -0.193 |          |        |     |                  |         |
| cg12423553 | 21 | 47,541,643  | 0.028808 | -0.207 | -0.105 |          |        |     | <i>COL6A2</i>    | Body    |
| cg16604658 | 12 | 64,847,188  | 3.22E-06 | -0.207 | -0.184 |          |        |     | <i>TBK1</i>      | 5'UTR   |
| cg04927725 | 8  | 30,670,732  | 2.83E-05 | -0.207 | -0.185 |          |        |     | <i>PPP2CB</i>    | TSS1500 |
| cg14481339 | 11 | 128,737,319 | 8.36E-05 | -0.207 | -0.211 | 2.34E-08 | -0.097 |     | <i>KCNJ1</i>     | TSS200  |
| cg21439896 | 1  | 36,108,233  | 0.002992 | -0.207 | -0.162 |          |        |     | <i>PSMB2</i>     | TSS1500 |
| cg04578317 | 14 | 105,189,737 | 0.000001 | -0.207 | -0.226 |          |        |     | <i>ADSSL1</i>    | TSS1500 |
| cg01150351 | 1  | 4,220,528   | 0.002907 | -0.207 | -0.110 |          |        |     |                  |         |
| cg02096790 | 16 | 89,920,010  | 0.028631 | -0.207 | -0.120 |          |        |     | <i>SPIRE2</i>    | Body    |
| cg07516742 | 8  | 55,383,951  | 0.018437 | -0.207 | -0.140 |          |        |     |                  |         |
| cg02391410 | 16 | 59,790,082  | 0.012452 | -0.207 | -0.148 |          |        |     | <i>LOC644649</i> | TSS1500 |
| cg20239081 | 12 | 121,687,822 | 0.000362 | -0.207 | -0.139 |          |        |     | <i>CAMKK2</i>    | Body    |
| cg02072170 | 3  | 194,406,190 | 0.000104 | -0.207 | -0.139 |          |        |     | <i>FAM43A</i>    | TSS1500 |
| cg03457781 | 3  | 20,418,856  | 0.009872 | -0.207 | -0.196 |          |        | Yes |                  |         |
| cg16596250 | 7  | 53,099,739  | 0.026371 | -0.207 | -0.129 |          |        |     |                  |         |
| cg24288715 | 6  | 163,745,629 | 1.11E-05 | -0.207 | -0.219 |          |        |     | <i>LOC285796</i> | TSS200  |
| cg27056759 | 14 | 105,373,391 | 0.007892 | -0.207 | -0.140 |          |        |     |                  |         |
| cg01790523 | 2  | 167,229,656 | 0.012227 | -0.207 | -0.148 |          |        |     | <i>SCN9A</i>     | 5'UTR   |
| cg13423469 | 10 | 116,856,408 | 4.75E-05 | -0.207 | -0.210 |          |        |     | <i>ATRNL1</i>    | Body    |
| cg04329382 | 22 | 46,480,891  | 3.11E-07 | -0.207 | -0.188 |          |        |     | <i>LOC400931</i> | TSS1500 |

|            |    |             |          |        |        |            |        |     |                 |         |
|------------|----|-------------|----------|--------|--------|------------|--------|-----|-----------------|---------|
| cg11252555 | 19 | 49,993,865  | 0.032695 | -0.207 | -0.120 |            |        |     | <i>RPL13AP5</i> | Body    |
| cg25960090 | 5  | 127,277,370 | 0.00018  | -0.207 | -0.202 |            |        |     |                 |         |
| cg17007389 | 7  | 55,874,624  | 0.044719 | -0.207 | -0.099 |            |        |     | <i>SEPT14</i>   | Body    |
| cg21771528 | 5  | 18,745,861  | 0.01711  | -0.207 | -0.175 |            |        |     |                 |         |
| cg12920333 | 14 | 71,805,172  | 1.6E-07  | -0.207 | -0.224 |            |        |     |                 |         |
| cg18146074 | 2  | 232,242,955 | 0.000499 | -0.207 | -0.183 |            |        |     |                 |         |
| cg16459890 | 11 | 104,916,331 | 0.044421 | -0.208 | -0.118 |            |        |     | <i>CASP1</i>    | Body    |
| cg05982301 | 5  | 121,751,763 | 0.000111 | -0.208 | -0.172 |            |        |     | <i>SNCAIP</i>   | Body    |
| cg15163151 | 8  | 100,906,373 | 0.001071 | -0.208 | -0.225 |            |        |     | <i>COX6C</i>    | TSS1500 |
| cg15328241 | 2  | 80,547,585  | 0.001478 | -0.208 | -0.247 |            |        |     | <i>CTNNA2</i>   | Body    |
| cg18087953 | 11 | 68,964,113  | 0.000531 | -0.208 | -0.121 |            |        |     |                 |         |
| cg06276810 | 6  | 153,224,221 | 0.003312 | -0.208 | -0.136 |            |        |     |                 |         |
| cg22608619 | 1  | 10,703,231  | 0.001396 | -0.208 | -0.154 |            |        |     | <i>CASZ1</i>    | Body    |
| cg02339243 | 19 | 8,810,253   | 0.011717 | -0.208 | -0.150 |            |        |     | <i>ACTL9</i>    | TSS1500 |
| cg01386157 | 6  | 29,403,982  | 0.011111 | -0.208 | -0.190 |            |        |     |                 |         |
| cg15618525 | 5  | 180,022,909 | 5.26E-05 | -0.208 | -0.196 |            |        |     |                 |         |
| cg04010040 | 4  | 93,646,144  | 0.000558 | -0.208 | -0.162 |            |        |     | <i>GRID2</i>    | Body    |
| cg08187034 | 2  | 38,970,936  | 2.76E-08 | -0.208 | -0.200 |            |        |     | <i>SFRS7</i>    | 3'UTR   |
| cg09109133 | 16 | 82,688,759  | 0.012268 | -0.208 | -0.178 |            |        |     | <i>CDH13</i>    | Body    |
| cg08048699 | 11 | 57,296,305  | 7.22E-08 | -0.208 | -0.206 |            |        |     | <i>TIMM10</i>   | Body    |
| cg15082843 | 7  | 130,371,296 | 0.000212 | -0.208 | -0.143 |            |        |     | <i>TSGA13</i>   | 5'UTR   |
| cg04568121 | 13 | 102,072,766 | 0.005918 | -0.208 | -0.158 |            |        |     |                 |         |
| cg16471612 | 5  | 127,294,693 | 0.000102 | -0.208 | -0.200 |            |        |     |                 |         |
| cg04286438 | 8  | 144,898,672 | 5.85E-10 | -0.208 | -0.172 |            |        |     | <i>PUF60</i>    | 3'UTR   |
| cg17934470 | 5  | 49,959,703  | 0.000223 | -0.208 | -0.165 |            |        |     |                 |         |
| cg26753302 | 18 | 61,143,993  | 0.000693 | -0.208 | -0.178 |            |        |     | <i>SERPINB5</i> | TSS200  |
| cg27508281 | 16 | 87,027,322  | 0.040179 | -0.208 | -0.072 |            |        |     |                 |         |
| cg04334496 | 6  | 133,953,605 | 0.012413 | -0.208 | -0.174 |            |        |     |                 |         |
| cg12072611 | 14 | 22,433,693  | 0.008749 | -0.208 | -0.188 |            |        |     |                 |         |
| cg12391048 | 16 | 2,770,336   | 0.000289 | -0.208 | -0.243 | 4.49E-09   | -0.110 |     | <i>PRSS27</i>   | 1stExon |
| cg10082354 | 11 | 131,672,204 | 0.003547 | -0.208 | -0.192 |            |        |     | <i>NTM</i>      | Body    |
| cg14733867 | 8  | 144,884,056 | 0.01201  | -0.208 | -0.180 |            |        |     | <i>SCRIB</i>    | Body    |
| cg15008587 | 4  | 122,927,073 | 0.013806 | -0.208 | -0.184 |            |        |     |                 |         |
| cg01469547 | 11 | 7,847,155   | 0.016088 | -0.208 | -0.165 | 0.00000644 | -0.129 | Yes | <i>OR5P3</i>    | 1stExon |

|            |    |             |          |        |        |            |        |     |                  |         |
|------------|----|-------------|----------|--------|--------|------------|--------|-----|------------------|---------|
| cg04397593 | 16 | 55,880,243  | 0.009969 | -0.208 | -0.136 |            |        | Yes | <i>CES7</i>      | 3'UTR   |
| cg21610297 | 12 | 53,857,464  | 0.000951 | -0.208 | -0.198 |            |        |     | <i>PCBP2</i>     | Body    |
| cg22619784 | 6  | 32,793,355  | 6.65E-07 | -0.208 | -0.206 |            |        |     | <i>TAP2</i>      | 3'UTR   |
| cg27295288 | 14 | 58,616,337  | 0.015198 | -0.208 | -0.217 |            |        |     | <i>C14orf37</i>  | 5'UTR   |
| cg12792367 | 7  | 100,238,750 | 0.008784 | -0.208 | -0.125 | 5.31E-10   | -0.094 |     | <i>TFR2</i>      | Body    |
| cg19107435 | 3  | 191,588,392 | 0.046203 | -0.208 | -0.089 |            |        |     |                  |         |
| cg21322022 | 2  | 115,421,931 | 0.021156 | -0.208 | -0.132 |            |        |     | <i>DPP10</i>     | Body    |
| cg03813951 | X  | 52,684,130  | 0.002612 | -0.208 | -0.165 |            |        |     | <i>SSX7</i>      | TSS200  |
| cg02244933 | 16 | 71,324,066  | 1.85E-08 | -0.208 | -0.246 |            |        |     | <i>FTSJD1</i>    | TSS1500 |
| cg23988024 | 19 | 594,272     | 0.000628 | -0.208 | -0.146 |            |        |     | <i>HCN2</i>      | Body    |
| cg08385211 | 10 | 50,118,141  | 0.038375 | -0.208 | -0.106 |            |        |     | <i>LRRC18</i>    | 3'UTR   |
| cg25342642 | 1  | 2,743,491   | 0.001394 | -0.208 | -0.189 |            |        |     |                  |         |
| cg05836475 | X  | 73,163,537  | 6.65E-09 | -0.208 | -0.207 |            |        |     | <i>LOC554203</i> | TSS1500 |
| cg10708400 | 6  | 30,130,449  | 7.55E-08 | -0.208 | -0.185 |            |        |     | <i>TRIM15</i>    | TSS1500 |
| cg14924160 | 13 | 41,496,235  | 0.036017 | -0.208 | -0.278 |            |        |     | <i>SUGT1L1</i>   | TSS1500 |
| cg19359983 | 13 | 103,346,900 | 0.031936 | -0.208 | -0.084 |            |        |     | <i>C13orf39</i>  | TSS200  |
| cg22901249 | 8  | 5,762,990   | 0.042962 | -0.208 | -0.137 |            |        |     |                  |         |
| cg27058221 | 16 | 14,766,421  | 4.94E-07 | -0.208 | -0.221 |            |        |     | <i>PLA2G10</i>   | 3'UTR   |
| cg09684245 | 1  | 57,263,497  | 0.000965 | -0.208 | -0.177 |            |        |     | <i>C1orf168</i>  | Body    |
| cg20695587 | 4  | 68,995,759  | 2.2E-05  | -0.208 | -0.195 | 0.00235185 | -0.050 |     | <i>TMPRSS11F</i> | TSS200  |
| cg01311955 | 11 | 132,965,250 | 0.018294 | -0.208 | -0.103 |            |        |     | <i>OPCML</i>     | Body    |
| cg02016764 | 4  | 38,805,732  | 3.28E-10 | -0.208 | -0.197 |            |        |     | <i>TLR1</i>      | 5'UTR   |
| cg05696436 | 16 | 1,373,786   | 2.11E-07 | -0.208 | -0.214 |            |        |     | <i>UBE2I</i>     | Body    |
| cg08195632 | 16 | 51,059,377  | 0.020342 | -0.208 | -0.187 |            |        |     |                  |         |
| cg10067062 | 21 | 44,086,302  | 4.5E-19  | -0.208 | -0.198 |            |        |     | <i>PDE9A</i>     | Body    |
| cg05881682 | 3  | 95,402,607  | 3.34E-05 | -0.208 | -0.185 |            |        |     |                  |         |
| cg12950492 | 4  | 187,000,846 | 0.001758 | -0.208 | -0.223 |            |        |     | <i>TLR3</i>      | Body    |
| cg15613991 | 7  | 5,277,080   | 2.02E-05 | -0.208 | -0.165 |            |        |     |                  |         |
| cg26532664 | 1  | 2,739,523   | 0.004402 | -0.208 | -0.159 |            |        |     |                  |         |
| cg02074956 | 16 | 4,730,657   | 4.73E-07 | -0.208 | -0.170 |            |        |     | <i>MGRN1</i>     | Body    |
| cg04790169 | 11 | 1,673,436   | 0.032161 | -0.208 | -0.156 |            |        |     | <i>HCCA2</i>     | Body    |
| cg23589587 | 1  | 75,558,249  | 3.02E-06 | -0.208 | -0.204 |            |        |     |                  |         |
| cg06768993 | 4  | 8,443,412   | 8.99E-05 | -0.208 | -0.197 |            |        |     | <i>ACOX3</i>     | TSS1500 |
| cg05078091 | 11 | 129,984,345 | 0.003228 | -0.208 | -0.218 |            |        |     | <i>APLP2</i>     | Body    |

|            |    |             |          |        |        |  |  |     |                |         |
|------------|----|-------------|----------|--------|--------|--|--|-----|----------------|---------|
| cg15001372 | 7  | 44,229,892  | 7.69E-07 | -0.208 | -0.166 |  |  |     | <i>GCK</i>     | TSS1500 |
| cg17868307 | 7  | 73,597,649  | 2.88E-05 | -0.208 | -0.229 |  |  |     | <i>EIF4H</i>   | Body    |
| cg00651359 | 7  | 132,219,281 | 0.019654 | -0.208 | -0.130 |  |  |     | <i>PLXNA4</i>  | 5'UTR   |
| cg24466229 | 8  | 32,618,341  | 0.010695 | -0.208 | -0.188 |  |  |     | <i>NRG1</i>    | Body    |
| cg05119686 | 10 | 31,967,157  | 7.39E-06 | -0.208 | -0.198 |  |  |     |                |         |
| cg07007062 | 5  | 38,417,095  | 4.58E-06 | -0.208 | -0.208 |  |  |     | <i>EGFLAM</i>  | Body    |
| cg16031846 | 8  | 33,628,265  | 3.13E-05 | -0.208 | -0.189 |  |  |     |                |         |
| cg27275374 | 7  | 47,539,765  | 1.22E-07 | -0.208 | -0.198 |  |  |     | <i>TNS3</i>    | 5'UTR   |
| cg02929780 | 11 | 59,282,555  | 0.002756 | -0.208 | -0.172 |  |  |     | <i>OR4D9</i>   | 1stExon |
| cg18229092 | 2  | 196,228,235 | 1.09E-05 | -0.208 | -0.188 |  |  |     |                |         |
| cg06746365 | 7  | 151,468,796 | 3.27E-05 | -0.208 | -0.109 |  |  |     | <i>PRKAG2</i>  | Body    |
| cg12050175 | 10 | 44,754,714  | 2.92E-07 | -0.208 | -0.204 |  |  | Yes |                |         |
| cg00750606 | 1  | 20,899,121  | 1.64E-05 | -0.208 | -0.176 |  |  |     |                |         |
| cg12074915 | 7  | 6,882,112   | 0.001509 | -0.208 | -0.223 |  |  |     |                |         |
| cg25485734 | 10 | 30,981,289  | 0.005575 | -0.208 | -0.142 |  |  |     |                |         |
| cg07672631 | 10 | 38,445,710  | 0.031808 | -0.208 | -0.145 |  |  |     |                |         |
| cg23290556 | 10 | 81,707,922  | 0.000477 | -0.208 | -0.157 |  |  |     | <i>SFTPD</i>   | 5'UTR   |
| cg02853387 | 11 | 117,484,904 | 0.005976 | -0.208 | -0.108 |  |  |     | <i>DSCAML1</i> | Body    |
| cg21150843 | 4  | 153,641,409 | 0.001634 | -0.208 | -0.212 |  |  |     |                |         |
| cg07483086 | 2  | 150,444,834 | 0.000698 | -0.208 | -0.212 |  |  |     | <i>MMADHC</i>  | TSS1500 |
| cg23161359 | X  | 21,960,400  | 3.61E-09 | -0.208 | -0.164 |  |  |     | <i>SMS</i>     | Body    |
| cg07220366 | 8  | 10,405,379  | 0.001967 | -0.208 | -0.201 |  |  |     |                |         |
| cg04946506 | 14 | 104,646,441 | 0.03085  | -0.208 | -0.077 |  |  |     | <i>KIF26A</i>  | 3'UTR   |
| cg23768940 | 12 | 108,585,952 | 9.28E-07 | -0.208 | -0.220 |  |  |     | <i>WSCD2</i>   | 5'UTR   |
| cg26522708 | 1  | 10,839,450  | 8.05E-06 | -0.208 | -0.210 |  |  |     | <i>CASZ1</i>   | 5'UTR   |
| cg27418851 | 10 | 54,531,653  | 0.00028  | -0.208 | -0.182 |  |  |     | <i>MBL2</i>    | TSS200  |
| cg18444589 | 14 | 101,521,608 | 0.029342 | -0.208 | -0.177 |  |  |     | <i>MIR485</i>  | TSS200  |
| cg19165216 | 11 | 811,661     | 2.45E-11 | -0.208 | -0.198 |  |  |     | <i>RPLP2</i>   | Body    |
| cg07153978 | 5  | 35,773,878  | 0.000222 | -0.208 | -0.203 |  |  |     | <i>SPEF2</i>   | Body    |
| cg03097190 | 22 | 32,854,361  | 0.001653 | -0.208 | -0.164 |  |  |     | <i>BPIL2</i>   | TSS1500 |
| cg13496244 | 7  | 4,925,830   | 0.028275 | -0.208 | -0.076 |  |  |     |                |         |
| cg00326648 | 2  | 61,246,248  | 6.43E-08 | -0.208 | -0.173 |  |  |     | <i>PEX13</i>   | Body    |
| cg06111374 | 12 | 14,109,584  | 0.033678 | -0.208 | -0.206 |  |  |     | <i>GRIN2B</i>  | 5'UTR   |
| cg17987059 | 13 | 28,752,067  | 7.48E-05 | -0.208 | -0.242 |  |  |     | <i>PAN3</i>    | Body    |

|            |    |             |          |        |        |          |        |  |                 |         |
|------------|----|-------------|----------|--------|--------|----------|--------|--|-----------------|---------|
| cg02467735 | 8  | 143,999,729 | 0.038642 | -0.208 | -0.106 |          |        |  | <i>CYP11B2</i>  | TSS1500 |
| cg07592388 | 3  | 191,178,814 | 0.000438 | -0.208 | -0.128 |          |        |  | <i>PYDC2</i>    | TSS200  |
| cg20837735 | 18 | 61,144,177  | 0.00117  | -0.208 | -0.186 |          |        |  | <i>SERPINB5</i> | 1stExon |
| cg16563470 | 17 | 40,119,847  | 2.31E-06 | -0.208 | -0.200 |          |        |  | <i>CNP</i>      | Body    |
| cg09044294 | 2  | 50,234,533  | 0.002781 | -0.208 | -0.146 |          |        |  | <i>NRXN1</i>    | Body    |
| cg08607280 | 19 | 58,693,421  | 3.86E-09 | -0.208 | -0.203 |          |        |  | <i>ZNF274</i>   | TSS1500 |
| cg24333364 | 12 | 128,869,782 | 0.025649 | -0.208 | -0.151 |          |        |  | <i>TMEM132C</i> | Body    |
| cg22461018 | 4  | 174,538,011 | 0.008483 | -0.208 | -0.188 | 1.01E-07 | -0.087 |  | <i>MORF4</i>    | TSS1500 |
| cg22789515 | 1  | 233,432,915 | 0.000335 | -0.208 | -0.123 |          |        |  | <i>PCNXL2</i>   | TSS1500 |
| cg02130289 | 17 | 80,732,581  | 4.51E-06 | -0.208 | -0.192 |          |        |  | <i>TBCD</i>     | Body    |
| cg07142325 | 1  | 119,684,001 | 0.004569 | -0.208 | -0.137 |          |        |  | <i>WARS2</i>    | TSS1500 |
| cg07990681 | 16 | 86,666,077  | 0.035216 | -0.208 | -0.129 |          |        |  |                 |         |
| cg05305046 | 5  | 40,841,315  | 0.001689 | -0.208 | -0.177 |          |        |  | <i>CARD6</i>    | TSS200  |
| cg09315586 | 13 | 104,168,550 | 0.005214 | -0.208 | -0.216 |          |        |  |                 |         |
| cg22115706 | 7  | 130,125,719 | 0.006043 | -0.208 | -0.183 |          |        |  | <i>MEST</i>     | TSS1500 |
| cg02547263 | 20 | 32,450,501  | 5.09E-09 | -0.208 | -0.199 |          |        |  |                 |         |
| cg18674828 | 12 | 132,839,436 | 0.003794 | -0.208 | -0.112 |          |        |  | <i>GALNT9</i>   | Body    |
| cg20724862 | 5  | 84,943,476  | 0.010662 | -0.208 | -0.167 |          |        |  |                 |         |
| cg16958148 | 7  | 49,060,407  | 5.09E-09 | -0.208 | -0.222 |          |        |  |                 |         |
| cg24393844 | 12 | 68,115,110  | 3.55E-09 | -0.208 | -0.204 |          |        |  |                 |         |
| cg05477331 | 11 | 133,716,207 | 0.040088 | -0.208 | -0.104 |          |        |  | <i>SPATA19</i>  | TSS1500 |
| cg14308375 | 4  | 111,545,119 | 0.018402 | -0.208 | -0.132 |          |        |  | <i>PITX2</i>    | TSS1500 |
| cg19970883 | 15 | 35,082,573  | 8.03E-05 | -0.208 | -0.218 |          |        |  | <i>ACTC1</i>    | 3'UTR   |
| cg06917998 | 14 | 73,269,031  | 0.008655 | -0.208 | -0.226 |          |        |  | <i>DPF3</i>     | Body    |
| cg08099626 | 17 | 3,213,032   | 0.013833 | -0.208 | -0.159 |          |        |  | <i>OR3A4</i>    | TSS1500 |
| cg06829157 | 1  | 93,430,542  | 2.01E-05 | -0.208 | -0.177 |          |        |  |                 |         |
| cg15528411 | 18 | 5,545,169   | 0.026678 | -0.208 | -0.243 |          |        |  | <i>EPB41L3</i>  | TSS1500 |
| cg26114457 | 1  | 157,895,649 | 0.001325 | -0.208 | -0.172 |          |        |  |                 |         |
| cg26390400 | 5  | 10,556,455  | 0.000179 | -0.208 | -0.178 |          |        |  |                 |         |
| cg14434922 | 9  | 991,047     | 0.014651 | -0.208 | -0.143 |          |        |  | <i>DMRT3</i>    | 3'UTR   |
| cg00238543 | 20 | 56,246,759  | 0.009835 | -0.209 | -0.214 |          |        |  | <i>PMEPA1</i>   | 5'UTR   |
| cg01449756 | 4  | 128,125,758 | 0.017726 | -0.209 | -0.140 |          |        |  |                 |         |
| cg17987968 | 5  | 152,869,882 | 2.62E-05 | -0.209 | -0.222 |          |        |  | <i>GRIA1</i>    | TSS1500 |
| cg25546004 | 11 | 114,645,223 | 0.000315 | -0.209 | -0.168 |          |        |  |                 |         |

|            |    |             |          |        |        |  |  |  |                 |         |
|------------|----|-------------|----------|--------|--------|--|--|--|-----------------|---------|
| cg27027375 | 4  | 6,695,319   | 0.001366 | -0.209 | -0.221 |  |  |  | <i>S100P</i>    | TSS1500 |
| cg01996004 | 5  | 180,338,435 | 0.006516 | -0.209 | -0.213 |  |  |  | <i>BTNL8</i>    | 5'UTR   |
| cg04844534 | 11 | 13,073,904  | 4.53E-07 | -0.209 | -0.202 |  |  |  |                 |         |
| cg13777287 | 6  | 154,830,168 | 1.95E-11 | -0.209 | -0.203 |  |  |  | <i>CNKSR3</i>   | Body    |
| cg09601514 | 2  | 119,698,352 | 0.001419 | -0.209 | -0.233 |  |  |  | <i>MARCO</i>    | TSS1500 |
| cg11728145 | 2  | 1,658,190   | 0.001455 | -0.209 | -0.187 |  |  |  | <i>PXDN</i>     | Body    |
| cg27304415 | 3  | 77,064,282  | 0.01534  | -0.209 | -0.169 |  |  |  |                 |         |
| cg20932426 | 1  | 2,415,221   | 3.44E-05 | -0.209 | -0.159 |  |  |  | <i>PLCH2</i>    | Body    |
| cg20312418 | 10 | 10,403,467  | 0.047648 | -0.209 | -0.181 |  |  |  |                 |         |
| cg23395692 | 12 | 23,119,040  | 0.039673 | -0.209 | -0.142 |  |  |  |                 |         |
| cg08234372 | 16 | 86,094,189  | 0.030005 | -0.209 | -0.076 |  |  |  |                 |         |
| cg09076299 | 10 | 9,920,000   | 7.38E-05 | -0.209 | -0.196 |  |  |  |                 |         |
| cg02848961 | 1  | 202,091,865 | 7.77E-05 | -0.209 | -0.141 |  |  |  | <i>GPR37L1</i>  | TSS200  |
| cg08988797 | 8  | 102,505,513 | 1.86E-13 | -0.209 | -0.199 |  |  |  | <i>GRHL2</i>    | Body    |
| cg21375452 | 12 | 9,997,326   | 0.011114 | -0.209 | -0.138 |  |  |  | <i>KLRF1</i>    | 3'UTR   |
| cg24057107 | 7  | 117,970,353 | 1.71E-05 | -0.209 | -0.204 |  |  |  |                 |         |
| cg21149595 | 14 | 93,813,495  | 0.013555 | -0.209 | -0.100 |  |  |  | <i>KIAA1409</i> | 5'UTR   |
| cg23244761 | 6  | 161,796,850 | 0.001368 | -0.209 | -0.207 |  |  |  | <i>PARK2</i>    | Body    |
| cg00673646 | 11 | 59,950,525  | 7.38E-08 | -0.209 | -0.211 |  |  |  | <i>MS4A6A</i>   | 1stExon |
| cg09673807 | 6  | 33,575,719  | 5.31E-09 | -0.209 | -0.180 |  |  |  |                 |         |
| cg18639495 | 10 | 70,584,876  | 6.11E-05 | -0.209 | -0.169 |  |  |  |                 |         |
| cg12687069 | 11 | 5,474,001   | 3.16E-05 | -0.209 | -0.168 |  |  |  | <i>OR5112</i>   | TSS1500 |
| cg22593395 | 3  | 21,038,502  | 0.042045 | -0.209 | -0.219 |  |  |  |                 |         |
| cg26315457 | 2  | 48,759,821  | 9.68E-11 | -0.209 | -0.205 |  |  |  |                 |         |
| cg09805403 | 16 | 12,010,698  | 6.58E-07 | -0.209 | -0.224 |  |  |  | <i>GSPT1</i>    | TSS1500 |
| cg13460378 | 2  | 88,788,866  | 0.032169 | -0.209 | -0.058 |  |  |  |                 |         |
| cg16178855 | 20 | 56,269,979  | 0.000261 | -0.209 | -0.250 |  |  |  | <i>PMEPA1</i>   | 5'UTR   |
| cg13282691 | 13 | 112,555,987 | 0.018841 | -0.209 | -0.048 |  |  |  |                 |         |
| cg18787420 | 20 | 30,309,466  | 8.21E-10 | -0.209 | -0.218 |  |  |  | <i>BCL2L1</i>   | Body    |
| cg13704497 | 6  | 31,590,622  | 8.35E-06 | -0.209 | -0.204 |  |  |  | <i>SNORA38</i>  | TSS1500 |
| cg02936263 | 17 | 32,596,886  | 0.032583 | -0.209 | -0.087 |  |  |  | <i>CCL7</i>     | TSS1500 |
| cg03625515 | 16 | 18,157,108  | 0.035706 | -0.209 | -0.153 |  |  |  |                 |         |
| cg05164406 | 16 | 29,830,908  | 0.000946 | -0.209 | -0.195 |  |  |  | <i>C16orf53</i> | Body    |
| cg19676238 | 1  | 2,342,094   | 0.00031  | -0.209 | -0.229 |  |  |  | <i>PEX10</i>    | Body    |



|            |    |             |          |        |        |  |  |  |                  |         |
|------------|----|-------------|----------|--------|--------|--|--|--|------------------|---------|
| cg04049225 | 16 | 85,672,175  | 0.002026 | -0.209 | -0.152 |  |  |  | <i>KIAA0182</i>  | 5'UTR   |
| cg12529432 | 8  | 23,538,610  | 0.009245 | -0.209 | -0.169 |  |  |  | <i>NKX3-1</i>    | 3'UTR   |
| cg19844110 | 4  | 9,533,426   | 9.73E-05 | -0.209 | -0.197 |  |  |  |                  |         |
| cg25532292 | 6  | 30,415,782  | 0.035806 | -0.209 | -0.134 |  |  |  |                  |         |
| cg01719179 | 16 | 29,296,693  | 3.32E-08 | -0.209 | -0.197 |  |  |  |                  |         |
| cg06593447 | 7  | 7,832,563   | 0.006713 | -0.209 | -0.133 |  |  |  |                  |         |
| cg15912390 | 3  | 194,826,514 | 0.015855 | -0.209 | -0.241 |  |  |  | <i>C3orf21</i>   | Body    |
| cg16594910 | 11 | 132,107,419 | 0.045389 | -0.209 | -0.129 |  |  |  | <i>NTM</i>       | Body    |
| cg00157656 | 8  | 644,663     | 0.000491 | -0.209 | -0.148 |  |  |  | <i>ERICH1</i>    | Body    |
| cg18447077 | X  | 77,912,605  | 0.026828 | -0.209 | -0.189 |  |  |  | <i>ZCCHC5</i>    | Body    |
| cg16029623 | 14 | 58,663,626  | 0.000114 | -0.209 | -0.185 |  |  |  |                  |         |
| cg05149537 | 22 | 45,709,699  | 0.000144 | -0.209 | -0.195 |  |  |  | <i>FAM118A</i>   | 5'UTR   |
| cg04165004 | 16 | 17,299,953  | 2.2E-08  | -0.209 | -0.237 |  |  |  | <i>XYLT1</i>     | Body    |
| cg05892146 | 17 | 3,337,184   | 0.01157  | -0.209 | -0.179 |  |  |  | <i>OR1E2</i>     | TSS200  |
| cg01556466 | 7  | 31,146,260  | 0.032944 | -0.209 | -0.160 |  |  |  | <i>ADCYAP1R1</i> | Body    |
| cg02119955 | 13 | 102,104,573 | 0.017159 | -0.209 | -0.083 |  |  |  | <i>ITGBL1</i>    | TSS1500 |
| cg14210985 | 12 | 28,115,804  | 1.82E-06 | -0.209 | -0.221 |  |  |  | <i>PTHLH</i>     | Body    |
| cg05058809 | 16 | 834,201     | 5.37E-08 | -0.209 | -0.146 |  |  |  | <i>MSLNL</i>     | TSS1500 |
| cg05357338 | 2  | 364,326     | 1.32E-05 | -0.209 | -0.144 |  |  |  |                  |         |
| cg06427176 | 5  | 178,854,265 | 0.038701 | -0.209 | -0.157 |  |  |  |                  |         |
| cg11802013 | 11 | 69,469,175  | 2.16E-05 | -0.209 | -0.204 |  |  |  | <i>CCND1</i>     | 3'UTR   |
| cg25471639 | 4  | 26,063,077  | 0.00767  | -0.209 | -0.123 |  |  |  |                  |         |
| cg21245207 | 9  | 136,837,406 | 4.98E-05 | -0.209 | -0.223 |  |  |  | <i>VAV2</i>      | Body    |
| cg00434535 | 7  | 9,022,554   | 0.041566 | -0.209 | -0.146 |  |  |  |                  |         |
| cg11428427 | X  | 151,563,983 | 0.035742 | -0.209 | -0.098 |  |  |  | <i>MIR105-2</i>  | TSS1500 |
| cg15906260 | 3  | 186,505,240 | 4.27E-13 | -0.209 | -0.206 |  |  |  | <i>SNORA4</i>    | TSS200  |
| cg21534317 | 2  | 115,602,681 | 0.004013 | -0.209 | -0.167 |  |  |  | <i>DPP10</i>     | Body    |
| cg01777913 | 12 | 7,077,090   | 9.75E-08 | -0.209 | -0.214 |  |  |  | <i>PHB2</i>      | Body    |
| cg22446491 | 15 | 98,961,376  | 0.031486 | -0.209 | -0.101 |  |  |  |                  |         |
| cg26495526 | 16 | 49,407,968  | 0.048036 | -0.209 | -0.184 |  |  |  | <i>C16orf78</i>  | 1stExon |
| cg22791045 | 11 | 133,403,793 | 0.014736 | -0.209 | -0.155 |  |  |  | <i>OPCML</i>     | TSS1500 |
| cg02755847 | 6  | 29,232,651  | 9.98E-06 | -0.209 | -0.218 |  |  |  |                  |         |
| cg17589883 | 11 | 1,260,199   | 0.000123 | -0.209 | -0.197 |  |  |  | <i>MUC5B</i>     | Body    |
| cg03128219 | 10 | 50,366,272  | 0.000974 | -0.209 | -0.197 |  |  |  | <i>C10orf128</i> | Body    |

|            |    |             |          |        |        |          |        |     |                  |         |
|------------|----|-------------|----------|--------|--------|----------|--------|-----|------------------|---------|
| cg10057126 | 4  | 77,819,792  | 0.004673 | -0.209 | -0.178 |          |        |     | <i>ANKRD56</i>   | TSS1500 |
| cg22693863 | 19 | 14,118,191  | 2.29E-06 | -0.209 | -0.239 |          |        |     | <i>RFX1</i>      | TSS1500 |
| cg23173806 | 6  | 30,299,968  | 7.52E-05 | -0.209 | -0.210 |          |        |     | <i>TRIM39</i>    | Body    |
| cg05973132 | 2  | 240,451,894 | 0.006527 | -0.209 | -0.155 |          |        |     |                  |         |
| cg07161395 | 16 | 51,390,410  | 0.039726 | -0.209 | -0.172 |          |        |     |                  |         |
| cg10988075 | 12 | 115,751,106 | 0.01926  | -0.209 | -0.265 |          |        |     |                  |         |
| cg20911707 | 8  | 3,855,415   | 0.016887 | -0.209 | -0.120 |          |        |     | <i>CSMD1</i>     | Body    |
| cg15348679 | 21 | 45,626,491  | 8.9E-09  | -0.209 | -0.205 |          |        |     |                  |         |
| cg24633312 | 7  | 43,300,742  | 0.008876 | -0.209 | -0.170 |          |        |     | <i>HECW1</i>     | Body    |
| cg09174601 | 17 | 13,442,632  | 0.022869 | -0.209 | -0.104 |          |        |     | <i>HS3ST3A1</i>  | Body    |
| cg20995127 | 2  | 135,808,369 | 0.00173  | -0.209 | -0.178 |          |        |     | <i>RAB3GAP1</i>  | TSS1500 |
| cg26029547 | 6  | 31,939,085  | 2.9E-08  | -0.209 | -0.214 |          |        |     | <i>STK19</i>     | TSS1500 |
| cg08818297 | 5  | 44,911,232  | 0.020018 | -0.209 | -0.151 |          |        |     |                  |         |
| cg06572812 | 15 | 27,110,587  | 0.005624 | -0.209 | -0.143 |          |        |     | <i>GABRA5</i>    | TSS1500 |
| cg23870181 | 6  | 32,713,044  | 0.008351 | -0.209 | -0.115 |          |        | Yes | <i>HLA-DQA2</i>  | Body    |
| cg26327040 | 12 | 131,561,080 | 0.04375  | -0.209 | -0.143 |          |        |     | <i>GPR133</i>    | Body    |
| cg01880929 | 2  | 36,614,588  | 1.79E-06 | -0.209 | -0.209 |          |        |     | <i>CRIM1</i>     | Body    |
| cg08996459 | 10 | 125,617,230 | 0.020815 | -0.209 | -0.143 |          |        |     | <i>CPXM2</i>     | Body    |
| cg02769535 | 2  | 56,574,420  | 0.010702 | -0.209 | -0.206 |          |        |     | <i>CCDC85A</i>   | Body    |
| cg02937080 | 19 | 23,183,750  | 0.000146 | -0.209 | -0.207 |          |        |     |                  |         |
| cg17288892 | 5  | 178,956,874 | 7.17E-06 | -0.209 | -0.217 |          |        |     |                  |         |
| cg23066564 | 22 | 46,481,734  | 2.09E-07 | -0.209 | -0.187 |          |        |     | <i>LOC400931</i> | TSS200  |
| cg15923139 | 4  | 186,801,896 | 1.57E-05 | -0.209 | -0.200 |          |        |     | <i>SORBS2</i>    | 5'UTR   |
| cg19961980 | 7  | 55,063,854  | 1.12E-09 | -0.209 | -0.219 |          |        |     |                  |         |
| cg26226546 | 7  | 103,088,199 | 2.38E-07 | -0.209 | -0.189 |          |        |     |                  |         |
| cg20015986 | 4  | 62,072,253  | 0.035466 | -0.209 | -0.180 |          |        |     |                  |         |
| cg08238568 | 1  | 241,474,238 | 0.01103  | -0.209 | -0.235 |          |        |     | <i>RGS7</i>      | Body    |
| cg10358939 | 3  | 192,973,502 | 0.016549 | -0.209 | -0.137 |          |        |     | <i>HRASLS</i>    | Body    |
| cg10437722 | 17 | 35,087,542  | 0.000127 | -0.209 | -0.204 |          |        |     |                  |         |
| cg23976981 | 13 | 22,560,659  | 0.045028 | -0.209 | -0.203 |          |        |     |                  |         |
| cg08899593 | 12 | 132,892,613 | 0.015751 | -0.209 | -0.096 |          |        |     | <i>GALNT9</i>    | Body    |
| cg17206001 | 11 | 118,219,601 | 0.004058 | -0.209 | -0.071 |          |        |     | <i>CD3G</i>      | Body    |
| cg15298173 | 15 | 29,903,900  | 1.62E-05 | -0.209 | -0.138 |          |        |     |                  |         |
| cg02992596 | 4  | 155,702,220 | 0.002978 | -0.209 | -0.130 | 3.96E-12 | -0.145 |     | <i>RBM46</i>     | TSS1500 |

|            |    |             |          |        |        |  |  |  |                   |         |
|------------|----|-------------|----------|--------|--------|--|--|--|-------------------|---------|
| cg20592707 | 1  | 152,086,623 | 0.000157 | -0.209 | -0.206 |  |  |  | <i>TCHH</i>       | TSS200  |
| cg21176026 | 4  | 156,592,010 | 0.026245 | -0.209 | -0.338 |  |  |  | <i>GUCY1A3</i>    | 5'UTR   |
| cg02232377 | 7  | 86,297,084  | 0.002367 | -0.209 | -0.177 |  |  |  | <i>GRM3</i>       | 5'UTR   |
| cg14746118 | X  | 135,569,630 | 0.039104 | -0.209 | -0.158 |  |  |  | <i>BRS3</i>       | TSS1500 |
| cg15695194 | 11 | 35,179,802  | 3.05E-05 | -0.209 | -0.168 |  |  |  | <i>CD44</i>       | Body    |
| cg01490663 | 16 | 87,091,301  | 0.028276 | -0.209 | -0.137 |  |  |  |                   |         |
| cg16285854 | 11 | 85,469,247  | 6.9E-05  | -0.209 | -0.194 |  |  |  | <i>SYTL2</i>      | TSS1500 |
| cg02743342 | 5  | 126,984,564 | 3.97E-06 | -0.209 | -0.224 |  |  |  | <i>CTXN3</i>      | TSS200  |
| cg17667294 | 19 | 6,333,761   | 1.46E-05 | -0.209 | -0.232 |  |  |  | <i>ACER1</i>      | TSS200  |
| cg12752325 | 11 | 2,137,875   | 0.000132 | -0.209 | -0.156 |  |  |  |                   |         |
| cg22599740 | 13 | 76,215,076  | 1.92E-06 | -0.209 | -0.184 |  |  |  | <i>LMO7</i>       | Body    |
| cg02363960 | 7  | 79,080,535  | 7.5E-07  | -0.209 | -0.223 |  |  |  | <i>MAGI2</i>      | Body    |
| cg25994871 | 7  | 107,967,614 | 2.14E-05 | -0.210 | -0.184 |  |  |  | <i>NRCAM</i>      | 5'UTR   |
| cg02876129 | 14 | 75,394,075  | 0.000384 | -0.210 | -0.235 |  |  |  |                   |         |
| cg00179940 | 12 | 126,978,053 | 0.00078  | -0.210 | -0.242 |  |  |  |                   |         |
| cg17316078 | 12 | 127,221,700 | 0.043299 | -0.210 | -0.151 |  |  |  |                   |         |
| cg19628619 | 1  | 155,104,050 | 4.09E-06 | -0.210 | -0.203 |  |  |  | <i>EFNA1</i>      | Body    |
| cg09640621 | 10 | 129,346,391 | 0.005102 | -0.210 | -0.137 |  |  |  | <i>NPS</i>        | TSS1500 |
| cg16586227 | 16 | 24,359,682  | 0.038701 | -0.210 | -0.155 |  |  |  | <i>CACNG3</i>     | Body    |
| cg13986969 | 9  | 73,984,868  | 3.88E-05 | -0.210 | -0.182 |  |  |  |                   |         |
| cg22063369 | 2  | 101,504,017 | 0.007471 | -0.210 | -0.273 |  |  |  | <i>NPAS2</i>      | 5'UTR   |
| cg04603355 | 19 | 35,264,987  | 0.003774 | -0.210 | -0.168 |  |  |  | <i>ZNF599</i>     | TSS1500 |
| cg09982883 | 17 | 33,704,726  | 0.000105 | -0.210 | -0.149 |  |  |  |                   |         |
| cg13049471 | 17 | 74,641,167  | 0.000222 | -0.210 | -0.199 |  |  |  | <i>ST6GALNAC1</i> | TSS1500 |
| cg02050232 | 16 | 29,296,614  | 1.36E-19 | -0.210 | -0.194 |  |  |  |                   |         |
| cg14199629 | 9  | 84,202,866  | 0.001356 | -0.210 | -0.187 |  |  |  | <i>TLE1</i>       | Body    |
| cg01066189 | 4  | 158,493,216 | 0.024407 | -0.210 | -0.157 |  |  |  | <i>LOC340017</i>  | TSS1500 |
| cg07956012 | 1  | 156,542,701 | 4.14E-06 | -0.210 | -0.175 |  |  |  | <i>IQGAP3</i>     | TSS1500 |
| cg20852364 | 3  | 30,301,024  | 0.012151 | -0.210 | -0.135 |  |  |  |                   |         |
| cg07303330 | 6  | 132,945,515 | 0.033467 | -0.210 | -0.112 |  |  |  | <i>TAAR2</i>      | TSS200  |
| cg07548668 | 3  | 151,388,160 | 0.012247 | -0.210 | -0.145 |  |  |  |                   |         |
| cg03415001 | 4  | 181,480,012 | 0.048527 | -0.210 | -0.136 |  |  |  |                   |         |
| cg05801374 | 1  | 24,283,657  | 2.49E-05 | -0.210 | -0.208 |  |  |  |                   |         |
| cg26422784 | 11 | 62,063,821  | 0.002938 | -0.210 | -0.173 |  |  |  | <i>SCGB1D4</i>    | 3'UTR   |

|            |    |             |          |        |        |  |  |                 |         |
|------------|----|-------------|----------|--------|--------|--|--|-----------------|---------|
| cg01829342 | 14 | 52,218,954  | 4.56E-05 | -0.210 | -0.232 |  |  |                 |         |
| cg03541338 | 10 | 121,301,343 | 0.036647 | -0.210 | -0.267 |  |  | <i>RGS10</i>    | Body    |
| cg01223204 | 22 | 22,863,655  | 4.79E-07 | -0.210 | -0.244 |  |  | <i>ZNF280B</i>  | TSS200  |
| cg03468967 | 3  | 19,673,982  | 0.002825 | -0.210 | -0.188 |  |  |                 |         |
| cg19095714 | 11 | 2,645,098   | 0.002223 | -0.210 | -0.229 |  |  | <i>KCNQ1</i>    | Body    |
| cg03429348 | 2  | 233,750,589 | 1.96E-05 | -0.210 | -0.210 |  |  | <i>NGEF</i>     | Body    |
| cg09588186 | 3  | 118,479,934 | 0.00109  | -0.210 | -0.239 |  |  |                 |         |
| cg11237207 | 1  | 158,911,377 | 0.000916 | -0.210 | -0.155 |  |  | <i>PYHIN1</i>   | Body    |
| cg14653988 | 5  | 167,171,284 | 3.56E-06 | -0.210 | -0.231 |  |  | <i>ODZ2</i>     | Body    |
| cg07207043 | 6  | 7,051,497   | 0.013716 | -0.210 | -0.192 |  |  |                 |         |
| cg17404981 | 4  | 1,240,264   | 1.01E-08 | -0.210 | -0.196 |  |  | <i>CTBP1</i>    | Body    |
| cg13437554 | 19 | 2,272,716   | 2.36E-17 | -0.210 | -0.205 |  |  | <i>OAZ1</i>     | Body    |
| cg04536957 | 3  | 184,487,758 | 0.003421 | -0.210 | -0.145 |  |  |                 |         |
| cg07099640 | 16 | 88,292,973  | 7.76E-16 | -0.210 | -0.187 |  |  |                 |         |
| cg18622538 | 12 | 34,523,825  | 0.000132 | -0.210 | -0.217 |  |  |                 |         |
| cg20181079 | 11 | 59,270,409  | 0.025746 | -0.210 | -0.199 |  |  | <i>OR4D11</i>   | TSS1500 |
| cg01156081 | 17 | 3,214,298   | 0.023119 | -0.210 | -0.086 |  |  | <i>OR3A4</i>    | Body    |
| cg12752420 | 1  | 43,751,363  | 5.84E-07 | -0.210 | -0.213 |  |  | <i>C1orf210</i> | TSS200  |
| cg15549435 | 7  | 14,192,484  | 7.2E-05  | -0.210 | -0.197 |  |  | <i>DGKB</i>     | Body    |
| cg23235622 | 20 | 34,039,349  | 0.000285 | -0.210 | -0.237 |  |  |                 |         |
| cg24481441 | 1  | 29,509,511  | 1.9E-06  | -0.210 | -0.204 |  |  | <i>SFRS4</i>    | TSS1500 |
| cg05221326 | 12 | 126,172,639 | 0.01417  | -0.210 | -0.221 |  |  |                 |         |
| cg11809107 | 2  | 3,826,782   | 5.61E-06 | -0.210 | -0.241 |  |  |                 |         |
| cg13917002 | 9  | 72,260,688  | 1.03E-05 | -0.210 | -0.200 |  |  | <i>APBA1</i>    | 5'UTR   |
| cg26978976 | 8  | 63,164,796  | 0.042583 | -0.210 | -0.171 |  |  | <i>NKAIN3</i>   | Body    |
| cg15886294 | 12 | 131,767,291 | 0.000404 | -0.210 | -0.137 |  |  |                 |         |
| cg12213811 | 12 | 122,251,152 | 4.7E-07  | -0.210 | -0.200 |  |  | <i>SETD1B</i>   | Body    |
| cg20797528 | 6  | 14,218,193  | 0.000472 | -0.210 | -0.239 |  |  |                 |         |
| cg11902093 | 11 | 1,661,972   | 0.000822 | -0.210 | -0.074 |  |  | <i>HCCA2</i>    | Body    |
| cg24310126 | 10 | 124,514,711 | 0.00522  | -0.210 | -0.107 |  |  | <i>FLJ46361</i> | TSS1500 |
| cg08670181 | 16 | 48,846,942  | 0.017331 | -0.210 | -0.169 |  |  |                 |         |
| cg14329066 | 8  | 73,885,161  | 0.017726 | -0.210 | -0.173 |  |  |                 |         |
| cg10877315 | 6  | 141,335,831 | 0.000294 | -0.210 | -0.148 |  |  |                 |         |
| cg17516997 | 15 | 53,100,108  | 1.49E-05 | -0.210 | -0.179 |  |  |                 |         |

|            |    |             |          |        |        |  |  |  |                    |         |
|------------|----|-------------|----------|--------|--------|--|--|--|--------------------|---------|
| cg22039357 | 1  | 184,388,675 | 6.92E-08 | -0.210 | -0.206 |  |  |  | <i>C1orf21</i>     | 5'UTR   |
| cg18893311 | 14 | 101,201,611 | 0.035445 | -0.210 | -0.135 |  |  |  |                    |         |
| cg20993386 | 17 | 65,408,367  | 4.64E-07 | -0.210 | -0.202 |  |  |  | <i>PITPNC1</i>     | Body    |
| cg17900015 | 17 | 38,957,507  | 0.000774 | -0.210 | -0.165 |  |  |  | <i>KRT28</i>       | TSS1500 |
| cg14221048 | 9  | 89,735,272  | 0.003285 | -0.210 | -0.146 |  |  |  |                    |         |
| cg16580289 | 6  | 90,025,307  | 2.52E-06 | -0.210 | -0.207 |  |  |  | <i>GABRR2</i>      | TSS1500 |
| cg16725552 | 14 | 26,338,282  | 0.040171 | -0.210 | -0.065 |  |  |  |                    |         |
| cg12937413 | 7  | 158,820,418 | 0.000372 | -0.210 | -0.233 |  |  |  |                    |         |
| cg23262094 | 1  | 209,422,036 | 5.39E-18 | -0.210 | -0.202 |  |  |  |                    |         |
| cg05231542 | 2  | 219,902,901 | 6.33E-06 | -0.210 | -0.192 |  |  |  | <i>CCDC108</i>     | Body    |
| cg25014026 | 8  | 73,735,989  | 3.47E-05 | -0.210 | -0.173 |  |  |  | <i>KCNB2</i>       | Body    |
| cg15717377 | 2  | 28,971,087  | 6E-05    | -0.210 | -0.203 |  |  |  |                    |         |
| cg08500171 | 6  | 31,590,674  | 1.22E-05 | -0.210 | -0.208 |  |  |  | <i>BAT2</i>        | Body    |
| cg13983692 | 19 | 3,808,649   | 3.12E-07 | -0.210 | -0.206 |  |  |  | <i>ZFR2</i>        | Body    |
| cg23415373 | 6  | 91,086,362  | 0.000839 | -0.210 | -0.149 |  |  |  |                    |         |
| cg05741638 | 16 | 90,084,774  | 4.64E-06 | -0.210 | -0.178 |  |  |  | <i>DBNDD1</i>      | Body    |
| cg13043454 | 2  | 48,980,605  | 0.019601 | -0.210 | -0.173 |  |  |  | <i>LHCGR</i>       | Body    |
| cg10022966 | 12 | 34,518,957  | 0.002073 | -0.210 | -0.157 |  |  |  |                    |         |
| cg16985023 | 10 | 133,195,834 | 0.008901 | -0.210 | -0.125 |  |  |  |                    |         |
| cg18966140 | 10 | 15,898,849  | 0.001993 | -0.210 | -0.188 |  |  |  | <i>FAM188A</i>     | Body    |
| cg03309455 | 8  | 88,845,118  | 0.024364 | -0.210 | -0.163 |  |  |  |                    |         |
| cg11274778 | 20 | 31,781,232  | 0.000106 | -0.210 | -0.203 |  |  |  | <i>BASE</i>        | TSS200  |
| cg05383657 | 12 | 34,757,822  | 0.000227 | -0.210 | -0.215 |  |  |  |                    |         |
| cg08918845 | 20 | 31,595,432  | 6.21E-05 | -0.210 | -0.229 |  |  |  | <i>BPIL1</i>       | 5'UTR   |
| cg10000148 | 14 | 101,447,095 | 0.005658 | -0.210 | -0.204 |  |  |  | <i>SNORD114-21</i> | TSS1500 |
| cg20668096 | 4  | 151,500,192 | 3.09E-06 | -0.210 | -0.208 |  |  |  | <i>LRBA</i>        | Body    |
| cg12755471 | 12 | 93,096,780  | 7.05E-06 | -0.210 | -0.220 |  |  |  | <i>C12orf74</i>    | TSS200  |
| cg00327332 | 20 | 23,498,993  | 0.012235 | -0.210 | -0.159 |  |  |  | <i>CSTT</i>        | TSS1500 |
| cg04565216 | 3  | 171,728,208 | 0.002063 | -0.210 | -0.237 |  |  |  |                    |         |
| cg07895124 | 16 | 57,599,076  | 0.045088 | -0.210 | -0.073 |  |  |  | <i>GPR114</i>      | Body    |
| cg10546603 | 11 | 49,003,527  | 0.007183 | -0.210 | -0.145 |  |  |  |                    |         |
| cg14520947 | 1  | 225,942,842 | 4.2E-06  | -0.210 | -0.235 |  |  |  |                    |         |
| cg15983182 | 7  | 73,474,232  | 4.82E-06 | -0.210 | -0.209 |  |  |  | <i>ELN</i>         | Body    |
| cg19939969 | 1  | 209,801,351 | 3.98E-14 | -0.210 | -0.202 |  |  |  | <i>LAMB3</i>       | Body    |

|            |    |             |          |        |        |            |        |  |                 |         |
|------------|----|-------------|----------|--------|--------|------------|--------|--|-----------------|---------|
| cg23048656 | 14 | 91,227,147  | 0.000286 | -0.210 | -0.131 |            |        |  | <i>TTC7B</i>    | Body    |
| cg17256192 | 5  | 31,323,297  | 0.046972 | -0.210 | -0.150 |            |        |  | <i>CDH6</i>     | Body    |
| cg19794481 | 12 | 7,073,240   | 0.000227 | -0.210 | -0.201 |            |        |  | <i>MIR141</i>   | TSS200  |
| cg04334235 | 14 | 106,188,793 | 0.000321 | -0.210 | -0.217 |            |        |  |                 |         |
| cg10432933 | 13 | 19,965,341  | 0.016625 | -0.210 | -0.158 |            |        |  |                 |         |
| cg26111327 | 3  | 195,164,931 | 0.001992 | -0.210 | -0.146 |            |        |  | <i>ACAP2</i>    | TSS1500 |
| cg02076020 | 1  | 201,979,938 | 1.47E-05 | -0.210 | -0.205 |            |        |  | <i>ELF3</i>     | 5'UTR   |
| cg16434510 | 8  | 129,800,022 | 0.04088  | -0.210 | -0.229 |            |        |  |                 |         |
| cg01206347 | 7  | 49,811,765  | 0.028539 | -0.210 | -0.229 |            |        |  | <i>VWC2</i>     | TSS1500 |
| cg18515872 | 14 | 72,943,461  | 1.65E-10 | -0.210 | -0.211 |            |        |  | <i>RGS6</i>     | Body    |
| cg21165909 | 2  | 211,419,938 | 0.003034 | -0.210 | -0.192 | 0.00000304 | -0.129 |  | <i>CPS1</i>     | Body    |
| cg10250660 | 14 | 23,876,824  | 9.92E-06 | -0.210 | -0.190 |            |        |  | <i>MYH6</i>     | 5'UTR   |
| cg13027851 | 2  | 102,433,793 | 5.78E-09 | -0.210 | -0.171 |            |        |  | <i>MAP4K4</i>   | Body    |
| cg01378062 | 3  | 88,961,910  | 0.040436 | -0.210 | -0.159 |            |        |  |                 |         |
| cg20707786 | 17 | 79,058,303  | 7.9E-13  | -0.210 | -0.173 |            |        |  | <i>BAIAP2</i>   | Body    |
| cg22077313 | 4  | 6,691,093   | 9.17E-15 | -0.210 | -0.208 |            |        |  |                 |         |
| cg23717593 | 1  | 86,617,731  | 0.005955 | -0.210 | -0.171 |            |        |  | <i>COL24A1</i>  | Body    |
| cg20884362 | 21 | 46,358,702  | 5.82E-06 | -0.210 | -0.201 | 0.01827691 | -0.040 |  | <i>C21orf67</i> | Body    |
| cg01612003 | 4  | 15,355,722  | 0.032738 | -0.210 | -0.210 |            |        |  | <i>C1QTNF7</i>  | Body    |
| cg26743132 | 13 | 111,107,905 | 3.44E-07 | -0.210 | -0.165 |            |        |  | <i>COL4A2</i>   | Body    |
| cg01344243 | 16 | 9,855,280   | 0.007398 | -0.210 | -0.172 |            |        |  | <i>GRIN2A</i>   | 3'UTR   |
| cg08645400 | 16 | 49,307,062  | 0.033606 | -0.210 | -0.141 |            |        |  |                 |         |
| cg18695263 | 3  | 196,387,505 | 0.000646 | -0.210 | -0.189 |            |        |  | <i>LRR33</i>    | Body    |
| cg19169535 | X  | 71,699,559  | 9.74E-09 | -0.210 | -0.205 |            |        |  | <i>HDAC8</i>    | Body    |
| cg22137572 | 5  | 19,915,602  | 0.000597 | -0.210 | -0.231 |            |        |  | <i>CDH18</i>    | 5'UTR   |
| cg25747783 | 7  | 105,603,622 | 1.68E-06 | -0.210 | -0.205 |            |        |  | <i>FLJ23834</i> | TSS200  |
| cg27635859 | 2  | 92,263,464  | 0.011368 | -0.210 | -0.165 |            |        |  |                 |         |
| cg13201362 | 1  | 215,567,839 | 0.009812 | -0.210 | -0.150 |            |        |  |                 |         |
| cg26138073 | 13 | 22,979,750  | 1.05E-05 | -0.210 | -0.186 |            |        |  |                 |         |
| cg08015107 | 11 | 8,618,950   | 2.47E-09 | -0.210 | -0.199 |            |        |  |                 |         |
| cg08623256 | 5  | 3,858,275   | 0.005902 | -0.210 | -0.112 |            |        |  |                 |         |
| cg27095035 | 17 | 48,623,891  | 0.007174 | -0.210 | -0.197 |            |        |  | <i>SPATA20</i>  | TSS1500 |
| cg26622537 | 11 | 101,458,233 | 0.023582 | -0.211 | -0.195 |            |        |  |                 |         |
| cg07614747 | 8  | 2,418,520   | 0.000163 | -0.211 | -0.231 |            |        |  |                 |         |

|            |    |             |          |        |        |          |        |  |                  |         |
|------------|----|-------------|----------|--------|--------|----------|--------|--|------------------|---------|
| cg14072219 | 1  | 242,162,802 | 0.007593 | -0.211 | -0.155 |          |        |  | <i>MAP1LC3C</i>  | TSS1500 |
| cg25282652 | 12 | 128,364,739 | 0.011698 | -0.211 | -0.187 |          |        |  |                  |         |
| cg08924619 | 13 | 111,160,399 | 2E-05    | -0.211 | -0.204 |          |        |  | <i>COL4A2</i>    | Body    |
| cg13745946 | 14 | 104,205,299 | 0.046464 | -0.211 | -0.106 |          |        |  | <i>PPP1R13B</i>  | Body    |
| cg05954120 | 1  | 156,254,757 | 2.56E-11 | -0.211 | -0.204 |          |        |  | <i>TMEM79</i>    | Body    |
| cg04826831 | 16 | 87,392,001  | 0.022853 | -0.211 | -0.060 |          |        |  | <i>FBXO31</i>    | Body    |
| cg16720379 | 11 | 33,506,184  | 0.033004 | -0.211 | -0.086 |          |        |  |                  |         |
| cg05279643 | 11 | 62,445,555  | 3.33E-07 | -0.211 | -0.190 |          |        |  | <i>UBXN1</i>     | Body    |
| cg10038490 | 10 | 124,515,334 | 0.006392 | -0.211 | -0.134 |          |        |  | <i>FLJ46361</i>  | TSS1500 |
| cg01861131 | 16 | 4,845,708   | 0.011803 | -0.211 | -0.186 |          |        |  | <i>LOC440335</i> | Body    |
| cg01897191 | 5  | 167,097,366 | 0.013045 | -0.211 | -0.161 |          |        |  | <i>ODZ2</i>      | Body    |
| cg05306183 | 8  | 11,144,705  | 4.41E-06 | -0.211 | -0.202 |          |        |  | <i>MTMR9</i>     | Body    |
| cg15165950 | 5  | 83,720,892  | 0.030621 | -0.211 | -0.152 |          |        |  |                  |         |
| cg18008487 | 7  | 95,157,228  | 4.12E-08 | -0.211 | -0.206 |          |        |  | <i>ASB4</i>      | Body    |
| cg24247132 | 7  | 64,458,642  | 2.3E-05  | -0.211 | -0.187 |          |        |  |                  |         |
| cg10759651 | 1  | 163,144,950 | 4.78E-05 | -0.211 | -0.180 |          |        |  | <i>RGS5</i>      | Body    |
| cg14360405 | 11 | 87,912,414  | 4.32E-05 | -0.211 | -0.182 |          |        |  |                  |         |
| cg15682266 | 6  | 134,155,787 | 0.004772 | -0.211 | -0.149 |          |        |  | <i>MGC34034</i>  | Body    |
| cg25481160 | 3  | 71,111,489  | 7.16E-12 | -0.211 | -0.205 |          |        |  | <i>FOXP1</i>     | Body    |
| cg12624721 | 8  | 143,511,575 | 0.005595 | -0.211 | -0.120 |          |        |  |                  |         |
| cg07044276 | 1  | 246,859,889 | 1.38E-06 | -0.211 | -0.182 |          |        |  |                  |         |
| cg10763891 | 7  | 93,300,578  | 0.016279 | -0.211 | -0.166 |          |        |  |                  |         |
| cg22682297 | 6  | 57,972,721  | 0.043623 | -0.211 | -0.135 |          |        |  |                  |         |
| cg02134660 | 6  | 54,710,399  | 0.037287 | -0.211 | -0.109 |          |        |  | <i>FAM83B</i>    | TSS1500 |
| cg03049917 | 15 | 88,752,391  | 0.014466 | -0.211 | -0.180 |          |        |  | <i>NTRK3</i>     | Body    |
| cg03146196 | 20 | 30,007,925  | 0.003513 | -0.211 | -0.140 |          |        |  | <i>DEFB122</i>   | TSS1500 |
| cg08319974 | 6  | 164,506,861 | 0.031101 | -0.211 | -0.152 |          |        |  |                  |         |
| cg08583240 | 2  | 102,460,597 | 0.000491 | -0.211 | -0.198 |          |        |  | <i>MAP4K4</i>    | Body    |
| cg24167473 | 3  | 113,899,263 | 0.000177 | -0.211 | -0.193 |          |        |  | <i>DRD3</i>      | TSS1500 |
| cg05686467 | 11 | 124,789,005 | 0.00024  | -0.211 | -0.205 |          |        |  | <i>HEPN1</i>     | TSS200  |
| cg07007122 | 8  | 89,270,978  | 0.040992 | -0.211 | -0.174 |          |        |  | <i>MMP16</i>     | Body    |
| cg07014174 | 21 | 32,253,760  | 0.036704 | -0.211 | -0.144 | 1.61E-08 | -0.184 |  | <i>KRTAP11-1</i> | 1stExon |
| cg11420780 | 11 | 71,320,513  | 0.017243 | -0.211 | -0.108 |          |        |  |                  |         |
| cg27569034 | 1  | 152,957,018 | 0.00205  | -0.211 | -0.143 |          |        |  | <i>SPRR1A</i>    | 5'UTR   |

|            |    |             |          |        |        |            |        |  |                 |         |
|------------|----|-------------|----------|--------|--------|------------|--------|--|-----------------|---------|
| cg07800498 | 8  | 2,244,943   | 0.002952 | -0.211 | -0.186 |            |        |  |                 |         |
| cg21546821 | 2  | 10,975,271  | 2.58E-07 | -0.211 | -0.216 |            |        |  |                 |         |
| cg00780520 | 8  | 128,808,554 | 0.004629 | -0.211 | -0.109 |            |        |  | <i>PVT1</i>     | Body    |
| cg14753070 | 19 | 14,163,842  | 0.019633 | -0.211 | -0.188 |            |        |  | <i>IL27RA</i>   | 3'UTR   |
| cg06393098 | 19 | 46,235,602  | 1.6E-06  | -0.211 | -0.180 |            |        |  | <i>FBXO46</i>   | TSS1500 |
| cg10077899 | 2  | 25,818,974  | 0.001219 | -0.211 | -0.229 |            |        |  | <i>DTNB</i>     | Body    |
| cg09763373 | 16 | 596,899     | 0.008515 | -0.211 | -0.111 |            |        |  | <i>SOLH</i>     | Body    |
| cg07912020 | 2  | 2,713,385   | 0.014094 | -0.211 | -0.174 |            |        |  |                 |         |
| cg10520226 | 1  | 2,811,554   | 6.64E-05 | -0.211 | -0.153 |            |        |  |                 |         |
| cg03238075 | 17 | 21,113,363  | 0.00069  | -0.211 | -0.202 |            |        |  | <i>TMEM11</i>   | Body    |
| cg00716660 | 1  | 224,543,513 | 1.83E-06 | -0.211 | -0.190 |            |        |  | <i>CNIH4</i>    | TSS1500 |
| cg01476885 | 17 | 21,908,498  | 0.015447 | -0.211 | -0.165 |            |        |  | <i>FLJ36000</i> | Body    |
| cg00564163 | 7  | 87,935,979  | 0.0299   | -0.211 | -0.244 | 0.00441312 | -0.041 |  | <i>STEAP4</i>   | 5'UTR   |
| cg17085280 | 18 | 31,018,457  | 0.014206 | -0.211 | -0.147 |            |        |  | <i>C18orf34</i> | 5'UTR   |
| cg04921771 | 1  | 40,349,687  | 0.004097 | -0.211 | -0.141 |            |        |  | <i>TRIT1</i>    | TSS1500 |
| cg10423328 | X  | 84,364,131  | 0.032414 | -0.211 | -0.182 |            |        |  | <i>SATL1</i>    | TSS200  |
| cg00947896 | 16 | 10,349,228  | 0.011317 | -0.211 | -0.104 |            |        |  |                 |         |
| cg18027831 | 1  | 227,083,489 | 0.000265 | -0.211 | -0.240 |            |        |  | <i>PSEN2</i>    | 3'UTR   |
| cg03062717 | 19 | 35,940,483  | 2.24E-07 | -0.211 | -0.202 |            |        |  | <i>FFAR2</i>    | TSS200  |
| cg04317927 | 11 | 55,418,816  | 0.000203 | -0.211 | -0.240 |            |        |  | <i>OR4S2</i>    | 1stExon |
| cg04348305 | 20 | 25,230,959  | 0.000268 | -0.211 | -0.188 |            |        |  | <i>PYGB</i>     | Body    |
| cg08212545 | 16 | 31,584,046  | 7.91E-06 | -0.211 | -0.169 |            |        |  |                 |         |
| cg14776195 | 20 | 29,956,028  | 0.019089 | -0.211 | -0.153 |            |        |  | <i>DEFB118</i>  | TSS1500 |
| cg26973989 | 4  | 190,949,036 | 0.033966 | -0.211 | -0.124 |            |        |  | <i>FRG2</i>     | TSS1500 |
| cg04050782 | 4  | 47,707,064  | 0.003697 | -0.211 | -0.157 |            |        |  | <i>CORIN</i>    | Body    |
| cg04036366 | 17 | 79,976,900  | 0.004262 | -0.211 | -0.181 |            |        |  | <i>STRA13</i>   | 3'UTR   |
| cg14518227 | 1  | 196,312,876 | 3.89E-08 | -0.211 | -0.200 |            |        |  | <i>KCNT2</i>    | Body    |
| cg17004025 | 19 | 840,795     | 1.63E-08 | -0.211 | -0.192 |            |        |  | <i>PRTN3</i>    | TSS200  |
| cg18884942 | 1  | 161,679,921 | 0.002946 | -0.211 | -0.169 |            |        |  | <i>FCRLA</i>    | Body    |
| cg07651080 | 3  | 77,145,918  | 0.005642 | -0.211 | -0.158 |            |        |  | <i>ROBO2</i>    | TSS1500 |
| cg04062040 | 2  | 103,343,421 | 3.71E-05 | -0.211 | -0.205 |            |        |  | <i>MFSD9</i>    | Body    |
| cg25598203 | 10 | 53,870,395  | 0.02067  | -0.211 | -0.066 |            |        |  | <i>PRKG1</i>    | Body    |
| cg21212505 | 7  | 117,228,958 | 1.57E-07 | -0.211 | -0.203 |            |        |  | <i>CFTR</i>     | Body    |
| cg22029284 | 1  | 3,077,356   | 0.000593 | -0.211 | -0.111 |            |        |  | <i>PRDM16</i>   | Body    |



|            |    |             |          |        |        |          |        |  |                  |         |
|------------|----|-------------|----------|--------|--------|----------|--------|--|------------------|---------|
| cg26088269 | 11 | 131,983,984 | 0.003612 | -0.211 | -0.177 |          |        |  | <i>NTM</i>       | Body    |
| cg05070372 | 16 | 87,027,489  | 0.002407 | -0.211 | -0.127 |          |        |  |                  |         |
| cg06639544 | 19 | 14,940,319  | 0.014488 | -0.211 | -0.108 |          |        |  | <i>OR7A5</i>     | TSS1500 |
| cg12017221 | 12 | 22,968,563  | 0.016522 | -0.211 | -0.145 |          |        |  |                  |         |
| cg12400457 | 1  | 115,919,812 | 9.8E-07  | -0.211 | -0.207 |          |        |  |                  |         |
| cg02283204 | 6  | 40,570,601  | 0.000144 | -0.211 | -0.177 |          |        |  |                  |         |
| cg00576736 | 1  | 20,030,383  | 0.000124 | -0.211 | -0.208 |          |        |  | <i>TMCO4</i>     | Body    |
| cg07844563 | 1  | 28,423,139  | 7.31E-06 | -0.211 | -0.202 |          |        |  | <i>LOC653566</i> | TSS200  |
| cg14877963 | 3  | 108,854,657 | 0.011651 | -0.211 | -0.142 |          |        |  |                  |         |
| cg20832320 | 3  | 49,712,339  | 0.000124 | -0.211 | -0.147 |          |        |  | <i>APEH</i>      | Body    |
| cg01514353 | 22 | 46,259,643  | 4.25E-10 | -0.211 | -0.175 |          |        |  |                  |         |
| cg06198390 | 1  | 152,648,726 | 0.018305 | -0.211 | -0.142 |          |        |  | <i>LCE2C</i>     | Body    |
| cg24328844 | 12 | 26,122,271  | 5.57E-05 | -0.211 | -0.219 |          |        |  | <i>RASSF8</i>    | 5'UTR   |
| cg24870391 | 17 | 32,612,675  | 4.19E-06 | -0.211 | -0.209 | 2.24E-16 | -0.136 |  | <i>CCL11</i>     | TSS200  |
| cg01921323 | 7  | 153,881,192 | 9.75E-05 | -0.211 | -0.223 |          |        |  | <i>DPP6</i>      | Body    |
| cg18185987 | 14 | 88,477,518  | 6.13E-08 | -0.211 | -0.199 |          |        |  | <i>GPR65</i>     | Body    |
| cg25233308 | 11 | 66,192,121  | 0.002298 | -0.211 | -0.122 |          |        |  | <i>NPAS4</i>     | Body    |
| cg03034101 | 4  | 166,631,112 | 0.00024  | -0.211 | -0.213 |          |        |  |                  |         |
| cg12034871 | 14 | 92,525,005  | 1.25E-05 | -0.211 | -0.243 |          |        |  | <i>ATXN3</i>     | Body    |
| cg12593764 | 15 | 83,332,873  | 0.014619 | -0.211 | -0.105 |          |        |  | <i>AP3B2</i>     | Body    |
| cg05911990 | 7  | 112,063,449 | 1.51E-09 | -0.211 | -0.204 |          |        |  | <i>IFRD1</i>     | 1stExon |
| cg00357546 | 10 | 135,032,154 | 0.044736 | -0.211 | -0.062 |          |        |  | <i>KNDC1</i>     | Body    |
| cg12569880 | 18 | 11,151,764  | 0.004014 | -0.211 | -0.156 |          |        |  |                  |         |
| cg25292309 | 2  | 58,989,427  | 1.12E-05 | -0.211 | -0.180 |          |        |  |                  |         |
| cg03039990 | 14 | 101,317,622 | 0.000995 | -0.211 | -0.183 |          |        |  | <i>MIR770</i>    | TSS1500 |
| cg09215582 | 4  | 71,575,507  | 0.000202 | -0.211 | -0.212 |          |        |  | <i>RUFY3</i>     | Body    |
| cg00473045 | 8  | 120,779,899 | 0.000132 | -0.211 | -0.224 |          |        |  | <i>TAF2</i>      | Body    |
| cg21838013 | 11 | 122,708,207 | 0.02434  | -0.211 | -0.160 |          |        |  | <i>CRTAM</i>     | TSS1500 |
| cg01633359 | 5  | 33,439,359  | 0.000435 | -0.211 | -0.216 |          |        |  |                  |         |
| cg04208853 | 5  | 5,890,802   | 0.020768 | -0.211 | -0.180 |          |        |  |                  |         |
| cg22688815 | 8  | 9,775,751   | 0.005522 | -0.211 | -0.200 |          |        |  |                  |         |
| cg05778559 | 3  | 16,646,375  | 0.022837 | -0.211 | -0.099 |          |        |  | <i>DAZL</i>      | Body    |
| cg14255655 | 2  | 137,891,808 | 0.011972 | -0.211 | -0.160 |          |        |  | <i>THSD7B</i>    | Body    |
| cg00018866 | 10 | 50,343,286  | 0.019658 | -0.211 | -0.082 |          |        |  | <i>FAM170B</i>   | TSS1500 |

|            |    |             |          |        |        |           |        |     |                 |         |
|------------|----|-------------|----------|--------|--------|-----------|--------|-----|-----------------|---------|
| cg00210127 | 16 | 12,352,233  | 0.015634 | -0.211 | -0.177 |           |        |     | <i>SNX29</i>    | Body    |
| cg00494183 | 13 | 21,645,350  | 9.03E-07 | -0.211 | -0.180 |           |        |     |                 |         |
| cg24336547 | 20 | 1,539,702   | 0.005438 | -0.211 | -0.210 |           |        |     | <i>SIRPD</i>    | TSS1500 |
| cg26808478 | 1  | 6,760,926   | 2.39E-06 | -0.211 | -0.249 |           |        |     | <i>DNAJC11</i>  | Body    |
| cg21822905 | 1  | 2,341,337   | 0.026441 | -0.211 | -0.293 |           |        |     | <i>PEX10</i>    | Body    |
| cg05025046 | 2  | 119,013,708 | 0.00184  | -0.211 | -0.209 |           |        |     |                 |         |
| cg10358212 | 16 | 81,069,005  | 0.000462 | -0.212 | -0.193 |           |        |     | <i>ATMIN</i>    | TSS1500 |
| cg27078562 | 4  | 175,838,768 | 0.003254 | -0.212 | -0.149 |           |        |     | <i>ADAM29</i>   | TSS1500 |
| cg18991321 | 7  | 100,144,475 | 0.000149 | -0.212 | -0.162 |           |        |     | <i>AGFG2</i>    | Body    |
| cg22553301 | 19 | 3,839,231   | 0.000448 | -0.212 | -0.176 |           |        |     | <i>ZFR2</i>     | Body    |
| cg05886537 | 11 | 132,936,428 | 0.047638 | -0.212 | -0.126 |           |        | Yes | <i>OPCML</i>    | Body    |
| cg08168844 | 16 | 29,830,973  | 4.62E-05 | -0.212 | -0.183 |           |        |     | <i>C16orf53</i> | Body    |
| cg18936502 | 7  | 35,187,811  | 6.57E-08 | -0.212 | -0.213 |           |        |     |                 |         |
| cg19861312 | 8  | 143,214,422 | 0.003005 | -0.212 | -0.121 |           |        |     |                 |         |
| cg02309655 | 19 | 2,588,629   | 0.000367 | -0.212 | -0.238 |           |        |     | <i>GNG7</i>     | 5'UTR   |
| cg20905413 | 3  | 36,375,125  | 0.012039 | -0.212 | -0.161 |           |        |     |                 |         |
| cg04767756 | 16 | 10,652,706  | 5.06E-13 | -0.212 | -0.204 |           |        |     | <i>EMP2</i>     | 5'UTR   |
| cg05885484 | 5  | 122,847,316 | 2.97E-05 | -0.212 | -0.199 |           |        |     | <i>CSNK1G3</i>  | TSS1500 |
| cg18926420 | 15 | 27,035,113  | 9.73E-05 | -0.212 | -0.159 |           |        |     |                 |         |
| cg15191887 | 5  | 664,666     | 0.031107 | -0.212 | -0.152 |           |        |     | <i>TPPP</i>     | 3'UTR   |
| cg22427279 | 1  | 116,384,534 | 0.000765 | -0.212 | -0.198 | 0.0000175 | -0.096 | Yes | <i>NHLH2</i>    | TSS1500 |
| cg27356115 | 15 | 53,422,311  | 4.34E-11 | -0.212 | -0.197 |           |        |     |                 |         |
| cg24414363 | 22 | 42,336,273  | 3.02E-06 | -0.212 | -0.189 |           |        |     | <i>CENPM</i>    | TSS200  |
| cg10309454 | 7  | 158,775,112 | 1.08E-05 | -0.212 | -0.183 |           |        |     |                 |         |
| cg09305680 | 8  | 117,778,069 | 7.45E-06 | -0.212 | -0.195 |           |        |     | <i>UTP23</i>    | TSS1500 |
| cg08166767 | 1  | 152,671,348 | 0.000668 | -0.212 | -0.196 |           |        |     | <i>LCE2A</i>    | 5'UTR   |
| cg23313644 | 14 | 82,296,090  | 0.002272 | -0.212 | -0.207 |           |        |     |                 |         |
| cg04703950 | 10 | 104,211,424 | 4.31E-06 | -0.212 | -0.194 |           |        |     | <i>C10orf95</i> | TSS200  |
| cg16548605 | 1  | 169,453,550 | 1.78E-06 | -0.212 | -0.128 |           |        |     | <i>SLC19A2</i>  | Body    |
| cg00949424 | 5  | 4,144,830   | 0.03354  | -0.212 | -0.098 |           |        |     |                 |         |
| cg18614510 | 22 | 47,081,903  | 2.01E-05 | -0.212 | -0.152 |           |        |     | <i>CERK</i>     | 3'UTR   |
| cg24533864 | 22 | 22,307,684  | 3.43E-05 | -0.212 | -0.140 |           |        |     | <i>PPM1F</i>    | TSS1500 |
| cg03952578 | 15 | 61,509,038  | 6.72E-05 | -0.212 | -0.206 |           |        |     | <i>RORA</i>     | Body    |
| cg10531104 | 6  | 169,235,025 | 7.29E-07 | -0.212 | -0.184 |           |        |     |                 |         |

|            |    |             |          |        |        |            |        |  |                |         |
|------------|----|-------------|----------|--------|--------|------------|--------|--|----------------|---------|
| cg08005208 | 1  | 163,395,211 | 0.009801 | -0.212 | -0.150 |            |        |  |                |         |
| cg23008136 | 2  | 55,743,936  | 0.001209 | -0.212 | -0.180 |            |        |  |                |         |
| cg18022607 | 3  | 61,924,802  | 7.46E-05 | -0.212 | -0.223 |            |        |  | <i>PTPRG</i>   | Body    |
| cg10999670 | 16 | 86,870,144  | 0.013208 | -0.212 | -0.105 |            |        |  |                |         |
| cg15314588 | 7  | 129,470,730 | 0.000364 | -0.212 | -0.204 |            |        |  |                |         |
| cg23611710 | 12 | 132,152,645 | 0.024938 | -0.212 | -0.058 |            |        |  |                |         |
| cg24183678 | 4  | 16,919,935  | 0.001873 | -0.212 | -0.128 |            |        |  |                |         |
| cg26010756 | 6  | 7,731,069   | 0.003632 | -0.212 | -0.201 |            |        |  | <i>BMP6</i>    | Body    |
| cg20695203 | 13 | 112,335,939 | 0.006449 | -0.212 | -0.089 |            |        |  |                |         |
| cg02777447 | 6  | 47,452,990  | 1.98E-06 | -0.212 | -0.235 |            |        |  | <i>CD2AP</i>   | Body    |
| cg02343275 | 1  | 212,589,072 | 1.79E-05 | -0.212 | -0.181 |            |        |  | <i>TMEM206</i> | TSS1500 |
| cg11061946 | 22 | 43,407,460  | 0.045422 | -0.212 | -0.147 |            |        |  |                |         |
| cg14813258 | 11 | 27,935,243  | 0.034554 | -0.212 | -0.149 |            |        |  |                |         |
| cg19290738 | 19 | 2,152,184   | 3.58E-13 | -0.212 | -0.209 |            |        |  | <i>AP3D1</i>   | TSS1500 |
| cg26274995 | 8  | 11,302,983  | 1.74E-05 | -0.212 | -0.177 |            |        |  | <i>FAM167A</i> | 5'UTR   |
| cg02491003 | 3  | 57,581,393  | 7.47E-09 | -0.212 | -0.195 |            |        |  | <i>ARF4</i>    | Body    |
| cg03401963 | 2  | 125,755,746 | 0.005509 | -0.212 | -0.200 |            |        |  |                |         |
| cg11042746 | 11 | 57,167,405  | 0.003072 | -0.212 | -0.175 |            |        |  |                |         |
| cg00758374 | 3  | 111,804,343 | 0.001885 | -0.212 | -0.164 |            |        |  | <i>C3orf52</i> | TSS1500 |
| cg00115458 | 6  | 33,141,305  | 0.007225 | -0.212 | -0.088 |            |        |  | <i>COL11A2</i> | Body    |
| cg10443159 | 7  | 7,839,258   | 1.48E-05 | -0.212 | -0.189 |            |        |  |                |         |
| cg27019122 | 12 | 34,538,786  | 0.000257 | -0.212 | -0.207 |            |        |  |                |         |
| cg06235145 | 4  | 17,034,835  | 0.000547 | -0.212 | -0.168 |            |        |  |                |         |
| cg26555733 | 16 | 23,846,279  | 0.00904  | -0.212 | -0.178 |            |        |  | <i>PRKCB</i>   | TSS1500 |
| cg00602655 | 10 | 35,979,870  | 0.000283 | -0.212 | -0.214 |            |        |  |                |         |
| cg01662869 | 16 | 4,730,410   | 3.71E-08 | -0.212 | -0.211 |            |        |  | <i>MGRN1</i>   | Body    |
| cg27069616 | 7  | 49,076,868  | 0.026068 | -0.212 | -0.211 |            |        |  |                |         |
| cg17851657 | 7  | 99,680,296  | 7.1E-07  | -0.212 | -0.222 |            |        |  | <i>ZNF3</i>    | TSS1500 |
| cg26321840 | 8  | 49,241,685  | 0.001832 | -0.212 | -0.159 |            |        |  |                |         |
| cg20188621 | 10 | 105,127,192 | 4.5E-10  | -0.212 | -0.208 |            |        |  | <i>TAF5</i>    | TSS1500 |
| cg27631593 | 1  | 153,065,613 | 0.023324 | -0.212 | -0.183 |            |        |  | <i>SPRR2E</i>  | 3'UTR   |
| cg00527514 | 11 | 132,002,516 | 0.030882 | -0.212 | -0.222 |            |        |  | <i>NTM</i>     | Body    |
| cg02723533 | 11 | 69,468,991  | 0.001633 | -0.212 | -0.202 | 0.00013485 | -0.063 |  | <i>CCND1</i>   | 3'UTR   |
| cg07506081 | 17 | 77,952,290  | 0.021179 | -0.212 | -0.205 |            |        |  | <i>TBC1D16</i> | Body    |

|            |    |             |          |        |        |          |        |  |          |         |
|------------|----|-------------|----------|--------|--------|----------|--------|--|----------|---------|
| cg10983206 | 10 | 7,564,401   | 0.000683 | -0.212 | -0.208 |          |        |  |          |         |
| cg01374885 | X  | 146,319,567 | 2.09E-06 | -0.212 | -0.210 |          |        |  | MIR508   | TSS1500 |
| cg09312149 | 5  | 114,516,420 | 7.73E-11 | -0.212 | -0.191 | 1.33E-07 | -0.079 |  | TRIM36   | TSS200  |
| cg13900542 | 1  | 74,888,995  | 0.03579  | -0.212 | -0.123 |          |        |  | TNNI3K   | Body    |
| cg01717194 | 13 | 39,543,257  | 0.030009 | -0.212 | -0.158 |          |        |  | STOML3   | Body    |
| cg21850934 | 11 | 90,451,108  | 0.017245 | -0.212 | -0.143 |          |        |  |          |         |
| cg20363199 | 10 | 108,335,668 | 0.001573 | -0.212 | -0.207 |          |        |  | SORCS1   | 3'UTR   |
| cg02279503 | 1  | 30,374,065  | 0.001592 | -0.212 | -0.121 |          |        |  |          |         |
| cg10954765 | 4  | 3,412,750   | 5.57E-06 | -0.212 | -0.223 |          |        |  | RGS12    | Body    |
| cg19250790 | 19 | 2,614,086   | 1.41E-08 | -0.212 | -0.187 |          |        |  | GNG7     | 5'UTR   |
| cg02263260 | 16 | 82,658,496  | 0.024339 | -0.212 | -0.213 |          |        |  |          |         |
| cg05201300 | 5  | 172,443,740 | 5.18E-09 | -0.212 | -0.207 |          |        |  | ATP6V0E1 | Body    |
| cg15983005 | 17 | 39,506,938  | 0.000917 | -0.212 | -0.120 | 1.91E-09 | -0.135 |  | KRT33A   | 1stExon |
| cg22608265 | 1  | 3,351,106   | 0.025048 | -0.212 | -0.191 |          |        |  | PRDM16   | 3'UTR   |
| cg16057408 | 14 | 101,196,998 | 0.011087 | -0.212 | -0.164 |          |        |  | DLK1     | Body    |
| cg12315311 | 19 | 54,568,443  | 0.00372  | -0.212 | -0.244 |          |        |  | VSTM1    | TSS1500 |
| cg05979170 | 3  | 131,974,369 | 1.95E-10 | -0.212 | -0.220 |          |        |  |          |         |
| cg19533977 | 17 | 57,719,682  | 2.01E-07 | -0.212 | -0.206 |          |        |  | CLTC     | Body    |
| cg23211310 | 10 | 50,120,250  | 0.042714 | -0.212 | -0.123 |          |        |  | LRRC18   | Body    |
| cg02487491 | 8  | 4,183,726   | 0.019127 | -0.212 | -0.196 |          |        |  | CSMD1    | Body    |
| cg15081844 | 3  | 133,117,569 | 0.002825 | -0.212 | -0.173 |          |        |  | BFSP2    | TSS1500 |
| cg19015997 | 7  | 12,611,607  | 0.038376 | -0.212 | -0.173 |          |        |  | SCIN     | Body    |
| cg06294766 | 4  | 154,680,314 | 0.040854 | -0.212 | -0.188 |          |        |  | RNF175   | Body    |
| cg07918509 | 17 | 62,083,407  | 8.3E-06  | -0.212 | -0.212 |          |        |  | ICAM2    | Body    |
| cg16325421 | 20 | 60,470,081  | 0.038712 | -0.212 | -0.103 |          |        |  | CDH4     | Body    |
| cg18115132 | 1  | 107,819,805 | 0.022095 | -0.212 | -0.124 |          |        |  | NTNG1    | Body    |
| cg06484232 | 11 | 5,905,350   | 7.45E-05 | -0.212 | -0.198 |          |        |  | OR52E4   | TSS200  |
| cg03171710 | 8  | 133,140,125 | 0.036106 | -0.212 | -0.164 |          |        |  |          |         |
| cg07224291 | 6  | 133,777,802 | 0.003885 | -0.212 | -0.219 |          |        |  | EYA4     | Body    |
| cg19228683 | 11 | 91,963,266  | 0.000265 | -0.212 | -0.160 |          |        |  |          |         |
| cg02709052 | 11 | 86,748,071  | 1.29E-05 | -0.212 | -0.189 |          |        |  | TMEM135  | TSS1500 |
| cg15649671 | 1  | 157,895,227 | 0.04046  | -0.212 | -0.109 |          |        |  |          |         |
| cg17108958 | 1  | 221,129,545 | 0.006109 | -0.212 | -0.238 |          |        |  |          |         |
| cg23822732 | 2  | 2,692,854   | 0.013652 | -0.212 | -0.191 |          |        |  |          |         |

|            |    |             |          |        |        |  |  |     |                  |         |
|------------|----|-------------|----------|--------|--------|--|--|-----|------------------|---------|
| cg09334699 | 2  | 2,193,511   | 0.002252 | -0.212 | -0.127 |  |  |     | <i>MYT1L</i>     | 5'UTR   |
| cg00670721 | 3  | 186,504,202 | 5.37E-10 | -0.212 | -0.200 |  |  |     | <i>SNORA63</i>   | TSS1500 |
| cg23228019 | 20 | 46,579,870  | 0.00067  | -0.212 | -0.147 |  |  |     |                  |         |
| cg07561132 | 20 | 18,794,975  | 0.001503 | -0.212 | -0.164 |  |  |     | <i>C20orf79</i>  | 1stExon |
| cg11865119 | 7  | 130,125,932 | 0.000799 | -0.212 | -0.240 |  |  |     | <i>MEST</i>      | TSS200  |
| cg11870021 | 17 | 21,913,158  | 0.014049 | -0.212 | -0.185 |  |  |     |                  |         |
| cg08343600 | 10 | 43,894,095  | 9.83E-06 | -0.212 | -0.205 |  |  |     | <i>HNRNPF</i>    | 5'UTR   |
| cg11064170 | 2  | 178,080,435 | 6.12E-05 | -0.212 | -0.158 |  |  |     | <i>HNRNPA3</i>   | Body    |
| cg17233896 | 12 | 127,227,116 | 0.03184  | -0.212 | -0.182 |  |  |     |                  |         |
| cg26620747 | 16 | 27,523,214  | 0.000238 | -0.212 | -0.228 |  |  |     | <i>GTF3C1</i>    | Body    |
| cg07960922 | 7  | 83,461,505  | 3.06E-06 | -0.212 | -0.174 |  |  |     |                  |         |
| cg15209376 | 13 | 102,104,976 | 0.001985 | -0.212 | -0.149 |  |  |     | <i>ITGBL1</i>    | 1stExon |
| cg23898213 | X  | 62,979,075  | 0.005829 | -0.212 | -0.160 |  |  |     |                  |         |
| cg01080552 | X  | 2,986,093   | 1.13E-06 | -0.212 | -0.207 |  |  |     | <i>ARSF</i>      | 5'UTR   |
| cg07884251 | 15 | 89,398,614  | 0.008336 | -0.212 | -0.107 |  |  |     | <i>ACAN</i>      | Body    |
| cg10013324 | 16 | 6,335,194   | 0.002746 | -0.212 | -0.220 |  |  |     | <i>A2BP1</i>     | 5'UTR   |
| cg14577716 | 3  | 95,402,225  | 0.005904 | -0.212 | -0.122 |  |  |     |                  |         |
| cg09614301 | 16 | 1,090,228   | 0.026424 | -0.212 | -0.113 |  |  |     |                  |         |
| cg10158151 | 17 | 51,900,032  | 0.015271 | -0.213 | -0.150 |  |  |     | <i>KIF2B</i>     | TSS1500 |
| cg21408061 | 1  | 155,989,796 | 4.07E-09 | -0.213 | -0.193 |  |  |     | <i>SSR2</i>      | Body    |
| cg08155584 | 3  | 82,314,701  | 0.020429 | -0.213 | -0.155 |  |  |     |                  |         |
| cg11629955 | 3  | 126,679,199 | 0.000274 | -0.213 | -0.241 |  |  |     | <i>CHCHD6</i>    | 3'UTR   |
| cg18890249 | 10 | 51,361,773  | 4.15E-05 | -0.213 | -0.176 |  |  |     | <i>LOC728407</i> | Body    |
| cg23066675 | 3  | 118,676,357 | 0.000128 | -0.213 | -0.211 |  |  |     | <i>IGSF11</i>    | Body    |
| cg17372047 | 19 | 22,807,010  | 0.006109 | -0.213 | -0.249 |  |  |     |                  |         |
| cg20545694 | 8  | 48,910,778  | 1.37E-05 | -0.213 | -0.151 |  |  |     |                  |         |
| cg00415389 | 7  | 138,162,679 | 3.34E-05 | -0.213 | -0.192 |  |  | Yes | <i>TRIM24</i>    | Body    |
| cg17218342 | 21 | 43,918,422  | 6.09E-09 | -0.213 | -0.219 |  |  |     | <i>SLC37A1</i>   | TSS1500 |
| cg03888764 | 7  | 57,207,547  | 4.63E-07 | -0.213 | -0.196 |  |  |     | <i>ZNF479</i>    | 5'UTR   |
| cg15769756 | 13 | 107,489,008 | 0.00177  | -0.213 | -0.162 |  |  |     |                  |         |
| cg24320225 | 8  | 2,238,305   | 0.000209 | -0.213 | -0.202 |  |  |     |                  |         |
| cg09211256 | 12 | 38,552,636  | 0.000194 | -0.213 | -0.181 |  |  |     |                  |         |
| cg10625488 | 2  | 203,733,187 | 3.86E-05 | -0.213 | -0.245 |  |  |     | <i>ICA1L</i>     | 5'UTR   |
| cg15389025 | 12 | 49,627,934  | 9.23E-05 | -0.213 | -0.166 |  |  |     |                  |         |

|            |    |             |          |        |        |  |  |  |                  |         |
|------------|----|-------------|----------|--------|--------|--|--|--|------------------|---------|
| cg21263710 | 18 | 49,865,488  | 0.000222 | -0.213 | -0.159 |  |  |  | <i>DCC</i>       | TSS1500 |
| cg00045762 | 5  | 167,181,762 | 0.039079 | -0.213 | -0.179 |  |  |  | <i>ODZ2</i>      | Body    |
| cg14833337 | 1  | 157,490,546 | 0.024985 | -0.213 | -0.163 |  |  |  | <i>FCRL5</i>     | Body    |
| cg23311800 | 11 | 34,535,396  | 5.74E-05 | -0.213 | -0.210 |  |  |  | <i>ELF5</i>      | TSS200  |
| cg25765192 | 1  | 13,184,954  | 0.019021 | -0.213 | -0.116 |  |  |  | <i>LOC440563</i> | TSS1500 |
| cg18984002 | 17 | 36,876,514  | 0.007438 | -0.213 | -0.144 |  |  |  | <i>MLLT6</i>     | Body    |
| cg21926883 | 2  | 100,939,477 | 1.37E-06 | -0.213 | -0.210 |  |  |  | <i>LONRF2</i>    | TSS1500 |
| cg27473997 | 4  | 9,355,351   | 0.001361 | -0.213 | -0.137 |  |  |  | <i>USP17</i>     | TSS200  |
| cg24707219 | 6  | 31,847,009  | 2.86E-12 | -0.213 | -0.216 |  |  |  | <i>SLC44A4</i>   | TSS200  |
| cg14851608 | 1  | 22,777,266  | 8.97E-06 | -0.213 | -0.180 |  |  |  | <i>ZBTB40</i>    | TSS1500 |
| cg18649198 | 7  | 151,477,667 | 5.84E-06 | -0.213 | -0.230 |  |  |  | <i>PRKAG2</i>    | Body    |
| cg03617867 | 6  | 155,053,338 | 8.33E-05 | -0.213 | -0.211 |  |  |  | <i>RBM16</i>     | TSS1500 |
| cg23304784 | 8  | 2,179,815   | 0.014891 | -0.213 | -0.071 |  |  |  |                  |         |
| cg09814128 | 4  | 178,243,783 | 0.002704 | -0.213 | -0.199 |  |  |  | <i>NEIL3</i>     | Body    |
| cg03142975 | 9  | 125,026,202 | 7.43E-20 | -0.213 | -0.221 |  |  |  | <i>MRRF</i>      | TSS1500 |
| cg04846432 | 3  | 186,965,021 | 0.014357 | -0.213 | -0.195 |  |  |  | <i>MASP1</i>     | 3'UTR   |
| cg15380358 | 20 | 61,937,737  | 0.003989 | -0.213 | -0.185 |  |  |  | <i>COL20A1</i>   | Body    |
| cg22537167 | 12 | 178,510     | 8.85E-11 | -0.213 | -0.201 |  |  |  | <i>IQSEC3</i>    | Body    |
| cg27236146 | 3  | 191,851,266 | 0.048943 | -0.213 | -0.161 |  |  |  |                  |         |
| cg08084390 | 11 | 55,044,082  | 0.007723 | -0.213 | -0.169 |  |  |  |                  |         |
| cg19442493 | 17 | 77,375,519  | 1.69E-08 | -0.213 | -0.191 |  |  |  | <i>HRNBP3</i>    | 5'UTR   |
| cg26950369 | 2  | 167,816,565 | 0.015176 | -0.213 | -0.190 |  |  |  | <i>XIRP2</i>     | Body    |
| cg23350812 | 2  | 236,415,734 | 0.010477 | -0.213 | -0.194 |  |  |  | <i>AGAP1</i>     | Body    |
| cg21813377 | 1  | 4,192,817   | 0.004105 | -0.213 | -0.120 |  |  |  |                  |         |
| cg07551952 | 7  | 12,613,522  | 0.00114  | -0.213 | -0.196 |  |  |  | <i>SCIN</i>      | Body    |
| cg02291365 | 13 | 25,317,267  | 0.001861 | -0.213 | -0.120 |  |  |  |                  |         |
| cg03729603 | 16 | 24,269,804  | 0.029017 | -0.213 | -0.133 |  |  |  | <i>CACNG3</i>    | Body    |
| cg04994795 | 1  | 8,404,050   | 3.93E-06 | -0.213 | -0.176 |  |  |  | <i>SLC45A1</i>   | Body    |
| cg15541062 | 11 | 5,531,199   | 0.00716  | -0.213 | -0.234 |  |  |  | <i>UBQLN3</i>    | TSS200  |
| cg18009093 | 5  | 177,853,574 | 4.59E-05 | -0.213 | -0.208 |  |  |  | <i>COL23A1</i>   | Body    |
| cg21663916 | 8  | 122,863,171 | 0.00067  | -0.213 | -0.174 |  |  |  |                  |         |
| cg09571345 | 10 | 26,931,926  | 2.66E-10 | -0.213 | -0.203 |  |  |  | <i>LOC731789</i> | TSS200  |
| cg14414873 | 9  | 112,970,463 | 7.68E-06 | -0.213 | -0.206 |  |  |  | <i>C9orf152</i>  | TSS200  |
| cg19050940 | 13 | 76,445,108  | 6.92E-12 | -0.213 | -0.198 |  |  |  |                  |         |

|            |    |             |          |        |        |  |  |     |                  |         |
|------------|----|-------------|----------|--------|--------|--|--|-----|------------------|---------|
| cg19785773 | 8  | 142,398,412 | 9.02E-14 | -0.213 | -0.214 |  |  |     |                  |         |
| cg12744694 | 8  | 89,300,240  | 0.03773  | -0.213 | -0.181 |  |  |     | <i>MMP16</i>     | Body    |
| cg16659026 | 19 | 54,617,827  | 0.015973 | -0.213 | -0.225 |  |  |     | <i>PRPF31</i>    | TSS1500 |
| cg19556854 | 6  | 32,945,549  | 8.62E-06 | -0.213 | -0.249 |  |  |     | <i>BRD2</i>      | Body    |
| cg26063643 | 22 | 16,998,752  | 0.004393 | -0.213 | -0.126 |  |  |     |                  |         |
| cg00253971 | 19 | 4,038,851   | 3.36E-11 | -0.213 | -0.233 |  |  |     |                  |         |
| cg04595200 | 12 | 34,486,507  | 0.000431 | -0.213 | -0.207 |  |  |     |                  |         |
| cg20810675 | 4  | 171,604,188 | 0.047953 | -0.213 | -0.208 |  |  |     |                  |         |
| cg21611093 | 3  | 134,512,956 | 0.000632 | -0.213 | -0.196 |  |  |     | <i>EPHB1</i>     | TSS1500 |
| cg19300923 | 1  | 14,026,137  | 2.17E-07 | -0.213 | -0.240 |  |  |     | <i>PRDM2</i>     | TSS1500 |
| cg18377376 | 11 | 131,707,728 | 0.035692 | -0.213 | -0.282 |  |  |     | <i>NTM</i>       | Body    |
| cg11188440 | 11 | 45,667,273  | 0.001067 | -0.213 | -0.153 |  |  |     |                  |         |
| cg00767201 | 19 | 22,141,063  | 7.75E-06 | -0.213 | -0.210 |  |  |     |                  |         |
| cg02686091 | 19 | 43,673,501  | 0.000832 | -0.213 | -0.155 |  |  |     | <i>PSG5</i>      | 3'UTR   |
| cg09479341 | 17 | 40,119,957  | 7.96E-07 | -0.213 | -0.226 |  |  |     | <i>CNP</i>       | Body    |
| cg10044209 | 14 | 88,122,084  | 0.00248  | -0.213 | -0.137 |  |  |     |                  |         |
| cg10079131 | 11 | 688,397     | 0.026634 | -0.213 | -0.126 |  |  |     | <i>DEAF1</i>     | Body    |
| cg03473127 | 19 | 51,411,782  | 6.12E-10 | -0.213 | -0.217 |  |  |     | <i>KLK4</i>      | Body    |
| cg18191092 | 8  | 64,331,042  | 9.55E-06 | -0.213 | -0.209 |  |  |     |                  |         |
| cg05195318 | 5  | 156,722,426 | 3.65E-05 | -0.213 | -0.198 |  |  | Yes | <i>CYFIP2</i>    | Body    |
| cg05693204 | 5  | 1,860,135   | 6.41E-05 | -0.213 | -0.162 |  |  |     |                  |         |
| cg02480320 | 5  | 2,135,054   | 0.000184 | -0.213 | -0.222 |  |  |     |                  |         |
| cg09043941 | 10 | 6,297,748   | 0.001079 | -0.213 | -0.207 |  |  |     |                  |         |
| cg04646186 | 15 | 27,215,757  | 0.000106 | -0.213 | -0.153 |  |  |     | <i>GABRG3</i>    | TSS1500 |
| cg01939535 | 5  | 55,010,789  | 1.27E-07 | -0.213 | -0.194 |  |  |     |                  |         |
| cg03410269 | 12 | 7,077,969   | 1.36E-05 | -0.213 | -0.199 |  |  |     | <i>PHB2</i>      | Body    |
| cg10755723 | 3  | 192,576,964 | 0.026112 | -0.213 | -0.125 |  |  |     | <i>C3orf59</i>   | Body    |
| cg26875832 | 7  | 54,346,209  | 0.000796 | -0.213 | -0.218 |  |  |     |                  |         |
| cg08145178 | X  | 103,294,452 | 0.015486 | -0.213 | -0.169 |  |  |     | <i>MIR1256</i>   | Body    |
| cg06143663 | 16 | 11,242,115  | 9.53E-06 | -0.213 | -0.199 |  |  |     | <i>CLEC16A</i>   | Body    |
| cg07467958 | 4  | 190,597,742 | 0.004215 | -0.213 | -0.185 |  |  |     |                  |         |
| cg00249974 | 1  | 156,254,149 | 3.42E-05 | -0.213 | -0.206 |  |  |     | <i>TMEM79</i>    | 1stExon |
| cg25553522 | 4  | 71,388,589  | 3.06E-05 | -0.213 | -0.202 |  |  |     | <i>AMTN</i>      | Body    |
| cg15579926 | 2  | 207,511,246 | 0.005258 | -0.213 | -0.099 |  |  |     | <i>LOC200726</i> | Body    |

|            |    |             |          |        |        |          |        |     |                   |         |
|------------|----|-------------|----------|--------|--------|----------|--------|-----|-------------------|---------|
| cg24174959 | 7  | 34,528,600  | 0.029261 | -0.213 | -0.212 |          |        |     |                   |         |
| cg05122213 | 13 | 114,062,198 | 1.07E-08 | -0.213 | -0.178 |          |        |     |                   |         |
| cg17753169 | 8  | 41,523,177  | 0.003066 | -0.213 | -0.109 |          |        | Yes | <i>ANK1</i>       | TSS1500 |
| cg17367832 | 2  | 241,395,288 | 0.000724 | -0.213 | -0.204 |          |        |     | <i>MIR149</i>     | TSS200  |
| cg26839288 | 10 | 44,287,132  | 0.02767  | -0.213 | -0.169 |          |        |     | <i>HNRNPA3P1</i>  | TSS1500 |
| cg19747968 | 11 | 131,940,559 | 4.05E-05 | -0.213 | -0.228 |          |        |     | <i>NTM</i>        | Body    |
| cg07859753 | 13 | 96,300,257  | 0.000349 | -0.213 | -0.210 |          |        |     |                   |         |
| cg15363455 | 7  | 1,650,412   | 0.016711 | -0.213 | -0.065 |          |        |     |                   |         |
| cg19647474 | 6  | 159,736,729 | 0.000968 | -0.213 | -0.169 |          |        |     |                   |         |
| cg08363001 | 10 | 10,945,277  | 0.021796 | -0.213 | -0.207 |          |        |     |                   |         |
| cg19837298 | 7  | 5,348,995   | 0.000269 | -0.213 | -0.147 |          |        |     | <i>TNRC18</i>     | Body    |
| cg27303733 | 11 | 8,007,457   | 1.3E-05  | -0.213 | -0.173 |          |        |     | <i>EIF3F</i>      | TSS1500 |
| cg15629868 | 1  | 8,319,945   | 1.25E-07 | -0.213 | -0.208 |          |        |     |                   |         |
| cg02416536 | 12 | 98,577,192  | 0.042676 | -0.213 | -0.320 |          |        |     |                   |         |
| cg08316234 | 17 | 51,899,386  | 0.001124 | -0.213 | -0.140 |          |        |     | <i>KIF2B</i>      | TSS1500 |
| cg01678292 | 8  | 41,522,873  | 5.25E-08 | -0.213 | -0.205 |          |        |     | <i>ANK1</i>       | TSS200  |
| cg16907101 | 13 | 112,747,087 | 0.046913 | -0.213 | -0.113 |          |        |     |                   |         |
| cg19765351 | 6  | 49,986,643  | 0.033905 | -0.213 | -0.169 |          |        |     | <i>DEFB110</i>    | Body    |
| cg25593631 | 1  | 9,687,880   | 0.000595 | -0.213 | -0.131 |          |        |     |                   |         |
| cg02815102 | 20 | 60,388,903  | 0.014581 | -0.213 | -0.160 |          |        | Yes | <i>CDH4</i>       | Body    |
| cg03526920 | 14 | 77,291,706  | 0.001653 | -0.213 | -0.157 |          |        |     | <i>C14orf166B</i> | TSS1500 |
| cg23029159 | 14 | 101,524,635 | 0.026116 | -0.214 | -0.226 |          |        |     | <i>MIR154</i>     | TSS1500 |
| cg15916628 | 19 | 56,092,834  | 5.75E-07 | -0.214 | -0.203 | 1.94E-09 | -0.079 |     | <i>ZNF579</i>     | TSS1500 |
| cg02711212 | 15 | 69,854,024  | 2.32E-05 | -0.214 | -0.213 |          |        |     | <i>LOC145837</i>  | TSS200  |
| cg20575856 | 10 | 50,428,882  | 0.047057 | -0.214 | -0.086 |          |        |     |                   |         |
| cg25628429 | 11 | 50,005,457  | 0.011468 | -0.214 | -0.187 |          |        |     | <i>OR4C12</i>     | TSS1500 |
| cg26899012 | 5  | 86,042,549  | 0.000326 | -0.214 | -0.197 |          |        |     |                   |         |
| cg01004918 | 1  | 2,731,370   | 3.63E-06 | -0.214 | -0.170 |          |        |     |                   |         |
| cg13376438 | 7  | 108,168,711 | 0.043082 | -0.214 | -0.067 |          |        |     |                   |         |
| cg20546259 | 2  | 49,271,470  | 0.01537  | -0.214 | -0.242 |          |        |     | <i>FSHR</i>       | Body    |
| cg25247520 | 8  | 128,808,017 | 2.94E-05 | -0.214 | -0.189 |          |        |     | <i>MIR1204</i>    | TSS200  |
| cg07353266 | 11 | 120,387,832 | 0.000218 | -0.214 | -0.264 |          |        |     |                   |         |
| cg09040942 | 7  | 158,060,003 | 0.000222 | -0.214 | -0.214 |          |        |     | <i>PTPRN2</i>     | Body    |
| cg11267879 | 19 | 41,619,952  | 0.045821 | -0.214 | -0.117 |          |        |     | <i>CYP2F1</i>     | TSS1500 |



|            |    |             |          |        |        |  |  |     |                 |         |
|------------|----|-------------|----------|--------|--------|--|--|-----|-----------------|---------|
| cg00162104 | 4  | 2,926,894   | 6.56E-05 | -0.214 | -0.240 |  |  |     | <i>ADD1</i>     | Body    |
| cg00522231 | 2  | 9,549,277   | 6.73E-05 | -0.214 | -0.214 |  |  |     | <i>ITGB1BP1</i> | Body    |
| cg19277516 | 1  | 94,235,220  | 0.00404  | -0.214 | -0.157 |  |  |     |                 |         |
| cg20466895 | 7  | 83,319,354  | 9.62E-05 | -0.214 | -0.198 |  |  |     |                 |         |
| cg17136696 | 1  | 2,823,861   | 0.031441 | -0.214 | -0.094 |  |  |     |                 |         |
| cg03138282 | 13 | 39,187,482  | 0.009814 | -0.214 | -0.158 |  |  |     |                 |         |
| cg16706613 | 12 | 52,423,671  | 2.28E-06 | -0.214 | -0.218 |  |  |     |                 |         |
| cg19201723 | 20 | 7,921,280   | 0.00078  | -0.214 | -0.194 |  |  |     | <i>HAO1</i>     | TSS200  |
| cg17035844 | 1  | 171,640,211 | 0.000333 | -0.214 | -0.217 |  |  |     |                 |         |
| cg14449317 | 7  | 62,198,343  | 0.015678 | -0.214 | -0.135 |  |  |     |                 |         |
| cg03265969 | 7  | 54,617,631  | 0.02796  | -0.214 | -0.200 |  |  |     | <i>VSTM2A</i>   | Body    |
| cg04365699 | 3  | 177,320,997 | 2.65E-05 | -0.214 | -0.205 |  |  |     |                 |         |
| cg08319312 | 12 | 34,500,811  | 0.038351 | -0.214 | -0.097 |  |  |     |                 |         |
| cg14541582 | 5  | 601,475     | 0.040123 | -0.214 | -0.205 |  |  | Yes |                 |         |
| cg17034342 | 12 | 132,870,388 | 7.81E-05 | -0.214 | -0.121 |  |  |     | <i>GALNT9</i>   | Body    |
| cg04164640 | 2  | 162,137,680 | 9.5E-14  | -0.214 | -0.168 |  |  |     |                 |         |
| cg04765207 | X  | 151,883,250 | 0.026732 | -0.214 | -0.160 |  |  |     | <i>MAGEA2</i>   | 5'UTR   |
| cg08523756 | 11 | 41,165,407  | 0.008612 | -0.214 | -0.168 |  |  |     |                 |         |
| cg11834658 | 1  | 21,611,224  | 3.7E-07  | -0.214 | -0.211 |  |  |     | <i>ECE1</i>     | Body    |
| cg11343506 | 11 | 34,535,568  | 0.048272 | -0.214 | -0.273 |  |  |     | <i>ELF5</i>     | TSS1500 |
| cg12758147 | 6  | 30,103,696  | 0.008132 | -0.214 | -0.210 |  |  |     | <i>TRIM40</i>   | TSS1500 |
| cg21767657 | 8  | 47,751,623  | 0.000938 | -0.214 | -0.216 |  |  |     | <i>BEYLA</i>    | TSS1500 |
| cg26329274 | 5  | 156,607,853 | 0.00792  | -0.214 | -0.169 |  |  |     | <i>ITK</i>      | TSS200  |
| cg03503758 | 19 | 2,614,104   | 1.19E-07 | -0.214 | -0.181 |  |  | Yes | <i>GNG7</i>     | 5'UTR   |
| cg04854917 | 10 | 131,378,330 | 7.77E-09 | -0.214 | -0.203 |  |  |     | <i>MGMT</i>     | Body    |
| cg05878332 | 11 | 109,302,849 | 8.31E-05 | -0.214 | -0.187 |  |  |     |                 |         |
| cg16933248 | 12 | 132,932,245 | 0.026847 | -0.214 | -0.104 |  |  |     |                 |         |
| cg18720533 | 10 | 134,833,372 | 0.014776 | -0.214 | -0.096 |  |  |     |                 |         |
| cg26389913 | 12 | 97,631,769  | 0.000276 | -0.214 | -0.280 |  |  |     |                 |         |
| cg02398007 | 12 | 67,616,546  | 0.02788  | -0.214 | -0.109 |  |  |     |                 |         |
| cg07869023 | 20 | 17,212,376  | 0.046058 | -0.214 | -0.235 |  |  |     | <i>PCSK2</i>    | Body    |
| cg22611523 | 10 | 10,630,114  | 0.028851 | -0.214 | -0.234 |  |  |     |                 |         |
| cg07294114 | 3  | 63,047,382  | 4.54E-12 | -0.214 | -0.221 |  |  |     |                 |         |
| cg11806305 | 5  | 139,782,703 | 8.04E-19 | -0.214 | -0.190 |  |  |     | <i>ANKHD1</i>   | Body    |

|            |    |             |          |        |        |  |  |  |                  |         |
|------------|----|-------------|----------|--------|--------|--|--|--|------------------|---------|
| cg02689785 | 10 | 105,004,949 | 3.12E-05 | -0.214 | -0.163 |  |  |  | <i>LOC729020</i> | TSS1500 |
| cg04655834 | 15 | 25,031,239  | 1.86E-08 | -0.214 | -0.193 |  |  |  |                  |         |
| cg16732341 | 4  | 112,130,812 | 0.019928 | -0.214 | -0.174 |  |  |  |                  |         |
| cg19304088 | 4  | 111,547,790 | 0.012765 | -0.214 | -0.149 |  |  |  | <i>PITX2</i>     | Body    |
| cg09170397 | 1  | 181,480,632 | 0.01492  | -0.214 | -0.245 |  |  |  | <i>CACNA1E</i>   | Body    |
| cg21649629 | 8  | 66,933,425  | 0.000154 | -0.214 | -0.232 |  |  |  | <i>DNAJC5B</i>   | TSS1500 |
| cg20985521 | 1  | 55,168,830  | 0.000233 | -0.214 | -0.153 |  |  |  | <i>C1orf175</i>  | Body    |
| cg05030450 | 5  | 167,480,853 | 0.032664 | -0.214 | -0.169 |  |  |  | <i>ODZ2</i>      | Body    |
| cg22455963 | X  | 132,095,750 | 7.1E-05  | -0.214 | -0.249 |  |  |  | <i>HS6ST2</i>    | TSS1500 |
| cg10015500 | 7  | 56,241,697  | 0.004067 | -0.214 | -0.193 |  |  |  |                  |         |
| cg16697850 | 7  | 141,946,928 | 2.82E-06 | -0.214 | -0.235 |  |  |  | <i>MOXD2</i>     | TSS200  |
| cg26080567 | 21 | 37,536,137  | 1.6E-06  | -0.214 | -0.204 |  |  |  | <i>DOPEY2</i>    | TSS1500 |
| cg26137103 | 4  | 40,193,114  | 0.000173 | -0.214 | -0.201 |  |  |  |                  |         |
| cg24522489 | 20 | 30,553,236  | 0.024611 | -0.214 | -0.083 |  |  |  |                  |         |
| cg02876221 | 4  | 134,545,513 | 0.000184 | -0.214 | -0.204 |  |  |  |                  |         |
| cg22831029 | 7  | 83,325,268  | 0.000382 | -0.214 | -0.254 |  |  |  |                  |         |
| cg00397871 | 7  | 31,692,686  | 0.02328  | -0.214 | -0.120 |  |  |  | <i>CCDC129</i>   | 3'UTR   |
| cg11241549 | 6  | 56,114,591  | 0.002111 | -0.214 | -0.158 |  |  |  |                  |         |
| cg09905416 | 11 | 59,861,219  | 0.000676 | -0.214 | -0.214 |  |  |  | <i>MS4A2</i>     | Body    |
| cg10257070 | 10 | 125,399,468 | 0.021762 | -0.214 | -0.199 |  |  |  |                  |         |
| cg19153300 | 11 | 134,794,980 | 0.029114 | -0.214 | -0.116 |  |  |  |                  |         |
| cg05810129 | 10 | 14,597,004  | 0.001049 | -0.214 | -0.151 |  |  |  | <i>FAM107B</i>   | Body    |
| cg11025037 | 14 | 25,104,483  | 7.96E-08 | -0.214 | -0.207 |  |  |  | <i>GZMB</i>      | TSS1500 |
| cg08439276 | 2  | 68,937,224  | 0.000168 | -0.214 | -0.188 |  |  |  |                  |         |
| cg16747973 | 4  | 155,533,784 | 0.007751 | -0.214 | -0.152 |  |  |  | <i>FGG</i>       | 5'UTR   |
| cg19911566 | 17 | 28,164,614  | 8.37E-05 | -0.214 | -0.179 |  |  |  | <i>SSH2</i>      | Body    |
| cg21588838 | 3  | 190,152,481 | 0.003473 | -0.214 | -0.175 |  |  |  | <i>TMEM207</i>   | Body    |
| cg18030265 | 6  | 32,975,083  | 0.000913 | -0.214 | -0.163 |  |  |  | <i>HLA-DOA</i>   | Body    |
| cg08271622 | 20 | 37,053,969  | 2.83E-12 | -0.214 | -0.181 |  |  |  | <i>LOC388796</i> | Body    |
| cg27026405 | 4  | 4,224,879   | 1.31E-06 | -0.214 | -0.183 |  |  |  | <i>OTOP1</i>     | Body    |
| cg19350375 | 10 | 98,624,529  | 9.95E-05 | -0.214 | -0.219 |  |  |  | <i>LCOR</i>      | 5'UTR   |
| cg24311643 | 1  | 159,748,210 | 0.000396 | -0.214 | -0.118 |  |  |  |                  |         |
| cg03419014 | 21 | 38,362,742  | 4.37E-15 | -0.214 | -0.224 |  |  |  | <i>HLCS</i>      | TSS1500 |
| cg04067806 | 10 | 50,974,397  | 0.003122 | -0.214 | -0.153 |  |  |  |                  |         |

|            |    |             |          |        |        |          |        |  |                  |         |
|------------|----|-------------|----------|--------|--------|----------|--------|--|------------------|---------|
| cg07012823 | 6  | 155,777,070 | 1.24E-05 | -0.214 | -0.196 |          |        |  | <i>NOX3</i>      | TSS200  |
| cg21615663 | 16 | 19,727,911  | 4.77E-06 | -0.214 | -0.230 | 1.74E-08 | -0.090 |  | <i>IQCK</i>      | 5'UTR   |
| cg05816993 | 11 | 59,709,403  | 0.014432 | -0.214 | -0.201 |          |        |  |                  |         |
| cg06109939 | 11 | 33,637,874  | 0.027977 | -0.214 | -0.148 |          |        |  | <i>C11orf41</i>  | Body    |
| cg00305947 | 18 | 13,822,384  | 9.78E-06 | -0.214 | -0.195 |          |        |  |                  |         |
| cg00111826 | 5  | 7,983,865   | 0.016954 | -0.214 | -0.156 |          |        |  |                  |         |
| cg03467728 | 1  | 46,220,388  | 0.005191 | -0.214 | -0.148 |          |        |  |                  |         |
| cg03877014 | 4  | 142,197,646 | 5.72E-10 | -0.214 | -0.219 |          |        |  |                  |         |
| cg10300464 | 11 | 15,012,924  | 0.008239 | -0.214 | -0.125 |          |        |  |                  |         |
| cg06752698 | 7  | 98,366,427  | 0.008258 | -0.214 | -0.147 |          |        |  |                  |         |
| cg07568203 | 11 | 5,365,377   | 0.02387  | -0.214 | -0.170 |          |        |  | <i>OR51B5</i>    | TSS1500 |
| cg09650495 | 7  | 32,463,798  | 0.000174 | -0.214 | -0.166 |          |        |  |                  |         |
| cg13691599 | 9  | 74,863,413  | 0.014641 | -0.214 | -0.173 |          |        |  | <i>GDA</i>       | 3'UTR   |
| cg18289557 | 13 | 113,426,705 | 1.91E-05 | -0.214 | -0.185 |          |        |  | <i>ATP11A</i>    | Body    |
| cg03688324 | 13 | 22,251,017  | 0.021763 | -0.214 | -0.188 |          |        |  | <i>FGF9</i>      | Body    |
| cg22540067 | 2  | 125,305,001 | 0.008501 | -0.214 | -0.257 |          |        |  | <i>CNTNAP5</i>   | Body    |
| cg25853612 | 10 | 19,540,759  | 0.000513 | -0.214 | -0.197 |          |        |  |                  |         |
| cg18571451 | 4  | 16,507,312  | 0.019185 | -0.214 | -0.209 |          |        |  | <i>LDB2</i>      | Body    |
| cg23336810 | 21 | 43,936,497  | 0.000144 | -0.214 | -0.199 |          |        |  | <i>SLC37A1</i>   | 5'UTR   |
| cg25666210 | 12 | 71,148,346  | 1.08E-09 | -0.214 | -0.207 |          |        |  | <i>PTPRR</i>     | 1stExon |
| cg08738346 | 5  | 152,352,697 | 0.039437 | -0.214 | -0.228 |          |        |  |                  |         |
| cg18807895 | 5  | 110,427,112 | 0.000415 | -0.214 | -0.170 |          |        |  | <i>WDR36</i>     | TSS1500 |
| cg26422762 | 22 | 46,481,785  | 1.96E-06 | -0.214 | -0.198 |          |        |  | <i>LOC400931</i> | TSS200  |
| cg04212127 | 11 | 78,809,824  | 2.48E-05 | -0.214 | -0.167 |          |        |  | <i>ODZ4</i>      | 5'UTR   |
| cg01902355 | 4  | 49,520,738  | 0.001766 | -0.215 | -0.160 |          |        |  |                  |         |
| cg05089225 | 4  | 7,395,027   | 0.000239 | -0.215 | -0.153 |          |        |  | <i>SORCS2</i>    | Body    |
| cg07333608 | 2  | 240,445,555 | 0.000748 | -0.215 | -0.156 |          |        |  |                  |         |
| cg09765297 | 16 | 83,029,415  | 0.000286 | -0.215 | -0.173 |          |        |  | <i>CDH13</i>     | Body    |
| cg07443717 | 3  | 129,383,357 | 0.00606  | -0.215 | -0.252 |          |        |  | <i>TMCC1</i>     | Body    |
| cg08651590 | 2  | 65,543,410  | 7.28E-09 | -0.215 | -0.206 |          |        |  | <i>SPRED2</i>    | Body    |
| cg02305353 | 12 | 113,307,748 | 0.03024  | -0.215 | -0.164 |          |        |  | <i>RPH3A</i>     | Body    |
| cg23024484 | 3  | 35,780,851  | 0.029736 | -0.215 | -0.148 |          |        |  | <i>ARPP-21</i>   | Body    |
| cg00009553 | 16 | 61,854,084  | 0.018973 | -0.215 | -0.145 |          |        |  | <i>CDH8</i>      | Body    |
| cg03123091 | 1  | 27,080,598  | 9.94E-06 | -0.215 | -0.218 |          |        |  | <i>ARID1A</i>    | Body    |

|            |    |             |          |        |        |            |        |  |                  |         |
|------------|----|-------------|----------|--------|--------|------------|--------|--|------------------|---------|
| cg07641643 | 12 | 123,234,584 | 1.14E-10 | -0.215 | -0.211 |            |        |  |                  |         |
| cg05269432 | 3  | 118,663,470 | 0.016364 | -0.215 | -0.198 |            |        |  | <i>IGSF11</i>    | Body    |
| cg10559407 | 4  | 147,287,029 | 1.86E-05 | -0.215 | -0.189 |            |        |  | <i>SLC10A7</i>   | Body    |
| cg27580689 | 10 | 115,939,651 | 3.43E-11 | -0.215 | -0.212 |            |        |  | <i>TDRD1</i>     | 5'UTR   |
| cg02634861 | 1  | 10,757,954  | 0.000231 | -0.215 | -0.219 |            |        |  | <i>CASZ1</i>     | 5'UTR   |
| cg19303187 | 2  | 172,968,881 | 4.55E-06 | -0.215 | -0.204 |            |        |  | <i>DLX2</i>      | TSS1500 |
| cg05123257 | 16 | 88,163,879  | 0.002264 | -0.215 | -0.145 |            |        |  |                  |         |
| cg02088996 | 7  | 41,817,771  | 0.024007 | -0.215 | -0.186 |            |        |  | <i>LOC285954</i> | Body    |
| cg10899768 | 8  | 102,506,635 | 5.81E-12 | -0.215 | -0.211 |            |        |  | <i>GRHL2</i>     | Body    |
| cg04293948 | 15 | 96,158,220  | 0.001152 | -0.215 | -0.153 |            |        |  |                  |         |
| cg23766996 | 7  | 86,272,023  | 0.03093  | -0.215 | -0.208 |            |        |  | <i>GRM3</i>      | TSS1500 |
| cg08908482 | 13 | 80,377,426  | 0.039945 | -0.215 | -0.083 |            |        |  |                  |         |
| cg00114478 | 8  | 73,658,110  | 0.000222 | -0.215 | -0.240 |            |        |  | <i>KCNB2</i>     | Body    |
| cg09029902 | 20 | 52,199,594  | 1.36E-13 | -0.215 | -0.228 |            |        |  | <i>ZNF217</i>    | 5'UTR   |
| cg14721506 | 20 | 61,758,358  | 0.000782 | -0.215 | -0.172 |            |        |  |                  |         |
| cg09009466 | 10 | 11,483,241  | 0.001952 | -0.215 | -0.170 |            |        |  |                  |         |
| cg10315366 | 10 | 134,911,047 | 0.000566 | -0.215 | -0.113 |            |        |  | <i>GPR123</i>    | Body    |
| cg17497052 | 11 | 125,763,722 | 6.35E-05 | -0.215 | -0.177 |            |        |  | <i>PUS3</i>      | Body    |
| cg09473613 | 1  | 24,152,604  | 0.002112 | -0.215 | -0.212 |            |        |  | <i>HMGCL</i>     | TSS1500 |
| cg01751800 | 4  | 77,820,391  | 0.000205 | -0.215 | -0.191 |            |        |  | <i>ANKRD56</i>   | TSS1500 |
| cg07356534 | 1  | 158,008,055 | 0.008708 | -0.215 | -0.140 |            |        |  | <i>KIRREL</i>    | Body    |
| cg26318682 | 2  | 53,261,081  | 0.026708 | -0.215 | -0.144 |            |        |  |                  |         |
| cg20962500 | 1  | 149,174,971 | 0.041763 | -0.215 | -0.117 |            |        |  |                  |         |
| cg09021430 | 5  | 549,028     | 0.001071 | -0.215 | -0.140 |            |        |  |                  |         |
| cg07857792 | 19 | 18,060,683  | 0.024278 | -0.215 | -0.278 |            |        |  | <i>KCNN1</i>     | TSS1500 |
| cg10677017 | 11 | 132,184,930 | 0.026906 | -0.215 | -0.235 |            |        |  | <i>NTM</i>       | Body    |
| cg26772104 | 17 | 51,501,596  | 0.020231 | -0.215 | -0.132 |            |        |  |                  |         |
| cg10283182 | 16 | 77,998,415  | 0.004    | -0.215 | -0.178 |            |        |  | <i>VAT1L</i>     | Body    |
| cg08470031 | 11 | 2,423,043   | 1.16E-09 | -0.215 | -0.189 |            |        |  | <i>TSSC4</i>     | TSS1500 |
| cg15590780 | 1  | 216,596,639 | 0.025834 | -0.215 | -0.274 | 0.00060695 | -0.095 |  | <i>USH2A</i>     | 1stExon |
| cg10028983 | 11 | 68,174,077  | 1.09E-07 | -0.215 | -0.221 |            |        |  | <i>LRP5</i>      | Body    |
| cg25494605 | 5  | 173,472,097 | 0.0161   | -0.215 | -0.211 |            |        |  | <i>HMP19</i>     | TSS1500 |
| cg22671986 | 4  | 62,799,523  | 0.002234 | -0.215 | -0.179 |            |        |  | <i>LPHN3</i>     | Body    |
| cg01407447 | 13 | 77,090,294  | 0.005961 | -0.215 | -0.161 |            |        |  |                  |         |

|            |    |             |          |        |        |          |        |  |                 |         |
|------------|----|-------------|----------|--------|--------|----------|--------|--|-----------------|---------|
| cg09617441 | 6  | 36,287,380  | 3.63E-08 | -0.215 | -0.212 |          |        |  | <i>C6orf222</i> | Body    |
| cg00208218 | 2  | 71,251,453  | 0.000162 | -0.215 | -0.215 |          |        |  | <i>OR7E91P</i>  | Body    |
| cg24205414 | 2  | 127,560,448 | 0.011607 | -0.215 | -0.157 |          |        |  |                 |         |
| cg05648964 | 12 | 8,833,355   | 0.007668 | -0.215 | -0.138 |          |        |  |                 |         |
| cg07179329 | 16 | 83,171,992  | 0.00161  | -0.215 | -0.210 |          |        |  | <i>CDH13</i>    | Body    |
| cg21762655 | 3  | 30,554,481  | 1.73E-10 | -0.215 | -0.210 |          |        |  |                 |         |
| cg21015470 | 11 | 132,621,619 | 0.048194 | -0.215 | -0.268 |          |        |  | <i>OPCML</i>    | Body    |
| cg08845685 | 2  | 8,167,037   | 0.002548 | -0.215 | -0.138 |          |        |  |                 |         |
| cg22866825 | 5  | 125,936,419 | 1.87E-05 | -0.215 | -0.168 |          |        |  | <i>PHAX</i>     | TSS1500 |
| cg07458500 | 19 | 2,796,382   | 0.00012  | -0.215 | -0.199 |          |        |  | <i>THOP1</i>    | Body    |
| cg09455823 | 2  | 201,606,912 | 3.74E-11 | -0.215 | -0.199 |          |        |  |                 |         |
| cg09834770 | 5  | 78,536,281  | 0.009355 | -0.215 | -0.210 |          |        |  | <i>JMY</i>      | Body    |
| cg18252424 | 3  | 13,862,475  | 0.024631 | -0.215 | -0.127 |          |        |  | <i>WNT7A</i>    | Body    |
| cg24837219 | 3  | 132,772,692 | 0.001455 | -0.215 | -0.235 |          |        |  | <i>TMEM108</i>  | 5'UTR   |
| cg04119852 | 3  | 182,840,603 | 0.000166 | -0.215 | -0.142 |          |        |  | <i>LAMP3</i>    | 3'UTR   |
| cg05612673 | 12 | 72,836,959  | 0.027404 | -0.215 | -0.112 |          |        |  | <i>TRHDE</i>    | Body    |
| cg04446870 | 17 | 64,440,273  | 0.007403 | -0.215 | -0.259 |          |        |  | <i>PRKCA</i>    | Body    |
| cg21854228 | 11 | 122,192,427 | 0.000513 | -0.215 | -0.192 |          |        |  |                 |         |
| cg00081465 | 18 | 77,383,609  | 0.001252 | -0.215 | -0.129 |          |        |  |                 |         |
| cg07824497 | 16 | 86,930,033  | 0.032761 | -0.215 | -0.110 |          |        |  |                 |         |
| cg09228327 | 12 | 24,908,780  | 0.039645 | -0.215 | -0.231 |          |        |  |                 |         |
| cg15086439 | 1  | 236,563,070 | 0.001063 | -0.215 | -0.187 |          |        |  | <i>EDARADD</i>  | Body    |
| cg09581935 | 10 | 114,591,707 | 4.31E-05 | -0.215 | -0.234 |          |        |  |                 |         |
| cg07473976 | 21 | 39,292,764  | 1.67E-06 | -0.215 | -0.178 |          |        |  |                 |         |
| cg15813550 | 20 | 62,221,886  | 0.013628 | -0.215 | -0.223 |          |        |  | <i>GMEB2</i>    | Body    |
| cg14696820 | 1  | 152,800,168 | 0.003642 | -0.215 | -0.216 | 3.69E-09 | -0.095 |  | <i>LCE1A</i>    | 1stExon |
| cg03794214 | 22 | 42,912,017  | 0.000102 | -0.215 | -0.182 |          |        |  | <i>RRP7A</i>    | Body    |
| cg04208435 | 1  | 192,116,518 | 0.034358 | -0.215 | -0.127 |          |        |  |                 |         |
| cg04314261 | 12 | 10,163,030  | 2.67E-05 | -0.215 | -0.207 |          |        |  | <i>CLEC12B</i>  | TSS200  |
| cg15799605 | 17 | 30,948,425  | 6.73E-10 | -0.215 | -0.211 |          |        |  | <i>MYO1D</i>    | Body    |
| cg10008571 | 17 | 76,987,812  | 0.000209 | -0.215 | -0.200 |          |        |  | <i>CANT1</i>    | 3'UTR   |
| cg19232395 | 11 | 8,550,221   | 0.000976 | -0.215 | -0.187 |          |        |  | <i>STK33</i>    | 5'UTR   |
| cg23891487 | 12 | 93,969,700  | 0.017569 | -0.215 | -0.071 |          |        |  | <i>SOCS2</i>    | 3'UTR   |
| cg08001580 | 8  | 6,637,992   | 5.32E-06 | -0.215 | -0.205 |          |        |  |                 |         |

|            |    |             |          |        |        |  |  |     |                 |         |
|------------|----|-------------|----------|--------|--------|--|--|-----|-----------------|---------|
| cg12309668 | 4  | 186,732,837 | 3.95E-09 | -0.215 | -0.212 |  |  |     | <i>SORBS2</i>   | 5'UTR   |
| cg15039415 | 17 | 45,690,396  | 4.22E-11 | -0.215 | -0.219 |  |  |     | <i>NPEPPS</i>   | Body    |
| cg16740364 | 19 | 34,718,795  | 2.8E-06  | -0.215 | -0.213 |  |  |     | <i>LSM14A</i>   | 3'UTR   |
| cg08787698 | 2  | 9,172,228   | 2.79E-06 | -0.215 | -0.191 |  |  |     |                 |         |
| cg02617560 | 8  | 32,785,757  | 0.000291 | -0.215 | -0.179 |  |  |     |                 |         |
| cg03632782 | 16 | 82,781,365  | 0.001154 | -0.215 | -0.219 |  |  |     | <i>CDH13</i>    | Body    |
| cg20016599 | 11 | 104,508,637 | 0.005886 | -0.215 | -0.096 |  |  |     |                 |         |
| cg11366886 | 20 | 11,666,805  | 0.01127  | -0.215 | -0.166 |  |  |     |                 |         |
| cg05082920 | 8  | 91,108,188  | 0.009735 | -0.215 | -0.208 |  |  |     |                 |         |
| cg12068366 | 19 | 4,548,354   | 1.66E-05 | -0.215 | -0.187 |  |  |     | <i>SEMA6B</i>   | Body    |
| cg22786657 | 10 | 11,381,854  | 0.019403 | -0.215 | -0.143 |  |  |     |                 |         |
| cg19091779 | 12 | 13,200,089  | 0.003148 | -0.215 | -0.301 |  |  |     | <i>KIAA1467</i> | Body    |
| cg13576330 | 5  | 92,943,267  | 3.41E-05 | -0.215 | -0.232 |  |  |     |                 |         |
| cg02609724 | 5  | 139,506,447 | 0.000651 | -0.215 | -0.214 |  |  |     | <i>C5orf53</i>  | 1stExon |
| cg10947001 | 4  | 139,593,196 | 0.002237 | -0.215 | -0.197 |  |  |     |                 |         |
| cg03192231 | 3  | 35,786,480  | 0.005971 | -0.216 | -0.157 |  |  |     | <i>ARPP-21</i>  | Body    |
| cg02540593 | 11 | 103,908,576 | 0.009103 | -0.216 | -0.190 |  |  |     | <i>PDGFD</i>    | Body    |
| cg04900186 | 7  | 50,347,487  | 0.027869 | -0.216 | -0.143 |  |  | Yes | <i>IKZF1</i>    | 5'UTR   |
| cg19243842 | 1  | 3,058,521   | 0.003984 | -0.216 | -0.162 |  |  |     | <i>PRDM16</i>   | Body    |
| cg07047815 | 11 | 1,909,656   | 0.004047 | -0.216 | -0.148 |  |  |     | <i>LSP1</i>     | 3'UTR   |
| cg16219879 | 16 | 32,937,057  | 1.03E-05 | -0.216 | -0.192 |  |  |     |                 |         |
| cg17373345 | 8  | 66,946,188  | 1.39E-09 | -0.216 | -0.210 |  |  |     | <i>DNAJC5B</i>  | 5'UTR   |
| cg17000480 | 10 | 134,756,994 | 1.69E-05 | -0.216 | -0.198 |  |  |     | <i>C10orf93</i> | TSS1500 |
| cg10841338 | X  | 150,342,651 | 3.17E-08 | -0.216 | -0.168 |  |  |     |                 |         |
| cg05000772 | 17 | 48,194,500  | 3.12E-06 | -0.216 | -0.221 |  |  |     | <i>SAMD14</i>   | Body    |
| cg04350120 | 8  | 93,004,284  | 0.022129 | -0.216 | -0.272 |  |  |     | <i>RUNX1T1</i>  | Body    |
| cg08197072 | 16 | 1,316,081   | 0.012041 | -0.216 | -0.065 |  |  |     |                 |         |
| cg27408897 | 18 | 67,136,810  | 0.028039 | -0.216 | -0.101 |  |  |     | <i>DOK6</i>     | Body    |
| cg16377738 | 17 | 76,141,068  | 3.37E-06 | -0.216 | -0.220 |  |  |     | <i>C17orf99</i> | TSS1500 |
| cg27361847 | 5  | 2,865,179   | 0.049864 | -0.216 | -0.069 |  |  |     |                 |         |
| cg05330604 | 15 | 91,837,300  | 1.96E-05 | -0.216 | -0.259 |  |  |     | <i>SV2B</i>     | 3'UTR   |
| cg00618087 | 17 | 16,282,382  | 0.000493 | -0.216 | -0.250 |  |  |     |                 |         |
| cg09787089 | 1  | 54,739,176  | 7.54E-05 | -0.216 | -0.190 |  |  |     | <i>SSBP3</i>    | Body    |
| cg14834881 | 4  | 92,034,737  | 3.93E-07 | -0.216 | -0.175 |  |  |     | <i>FAM190A</i>  | Body    |

|            |    |             |          |        |        |  |  |  |                  |         |
|------------|----|-------------|----------|--------|--------|--|--|--|------------------|---------|
| cg16710099 | 1  | 3,162,173   | 2E-05    | -0.216 | -0.165 |  |  |  | <i>PRDM16</i>    | Body    |
| cg11058951 | 7  | 92,855,729  | 0.005716 | -0.216 | -0.213 |  |  |  | <i>HEPACAM2</i>  | 1stExon |
| cg07656641 | 22 | 50,018,876  | 0.029682 | -0.216 | -0.117 |  |  |  | <i>C22orf34</i>  | Body    |
| cg06969622 | 17 | 79,022,798  | 0.000612 | -0.216 | -0.151 |  |  |  | <i>BAIAP2</i>    | Body    |
| cg22235258 | 11 | 34,675,402  | 1.03E-05 | -0.216 | -0.217 |  |  |  | <i>EHF</i>       | Body    |
| cg26856658 | 12 | 128,899,884 | 0.01012  | -0.216 | -0.159 |  |  |  | <i>TMEM132C</i>  | Body    |
| cg25080924 | 4  | 176,339,367 | 0.000249 | -0.216 | -0.169 |  |  |  |                  |         |
| cg26518932 | 5  | 169,720,975 | 4.77E-06 | -0.216 | -0.149 |  |  |  | <i>LCP2</i>      | Body    |
| cg25029529 | 2  | 208,795,859 | 0.000133 | -0.216 | -0.230 |  |  |  | <i>PLEKHM3</i>   | Body    |
| cg26242755 | 6  | 6,624,147   | 6.68E-11 | -0.216 | -0.183 |  |  |  | <i>LOC285780</i> | TSS1500 |
| cg10115148 | 1  | 2,872,908   | 0.025813 | -0.216 | -0.111 |  |  |  |                  |         |
| cg02328713 | 1  | 2,704,354   | 0.015833 | -0.216 | -0.091 |  |  |  |                  |         |
| cg02487061 | 1  | 85,721,250  | 0.000256 | -0.216 | -0.230 |  |  |  | <i>C1orf52</i>   | Body    |
| cg20135307 | 7  | 127,256,705 | 0.020352 | -0.216 | -0.118 |  |  |  | <i>PAX4</i>      | TSS1500 |
| cg01553182 | 6  | 29,342,533  | 0.003582 | -0.216 | -0.162 |  |  |  | <i>OR12D3</i>    | 1stExon |
| cg18009704 | 17 | 3,117,981   | 0.031026 | -0.216 | -0.120 |  |  |  | <i>OR1A1</i>     | TSS1500 |
| cg22073121 | 5  | 41,045,396  | 0.040831 | -0.216 | -0.166 |  |  |  | <i>HEATR7B2</i>  | Body    |
| cg09241714 | 7  | 50,366,850  | 0.014023 | -0.216 | -0.211 |  |  |  | <i>IKZF1</i>     | Body    |
| cg18413237 | 7  | 41,742,795  | 0.006252 | -0.216 | -0.215 |  |  |  | <i>LOC285954</i> | Body    |
| cg10773972 | 15 | 81,035,670  | 4.09E-05 | -0.216 | -0.234 |  |  |  | <i>FAM108C1</i>  | Body    |
| cg27533472 | 11 | 59,856,225  | 0.000194 | -0.216 | -0.197 |  |  |  | <i>MS4A2</i>     | 1stExon |
| cg04957903 | 7  | 38,880,852  | 0.006512 | -0.216 | -0.099 |  |  |  | <i>VPS41</i>     | Body    |
| cg09154034 | 4  | 172,846,599 | 0.004737 | -0.216 | -0.170 |  |  |  | <i>GALNTL6</i>   | Body    |
| cg26236655 | 2  | 200,051,434 | 0.034832 | -0.216 | -0.203 |  |  |  |                  |         |
| cg06832258 | 8  | 34,533,034  | 0.04142  | -0.216 | -0.087 |  |  |  |                  |         |
| cg23484230 | 10 | 133,218,314 | 0.045917 | -0.216 | -0.106 |  |  |  |                  |         |
| cg24938372 | 6  | 1,603,115   | 8.15E-07 | -0.216 | -0.232 |  |  |  |                  |         |
| cg25429446 | 4  | 113,839,045 | 5.06E-07 | -0.216 | -0.200 |  |  |  | <i>ANK2</i>      | Body    |
| cg02855850 | 1  | 152,882,420 | 0.023545 | -0.216 | -0.168 |  |  |  | <i>IVL</i>       | Body    |
| cg23290674 | 8  | 112,906,823 | 0.001583 | -0.216 | -0.187 |  |  |  |                  |         |
| cg08908643 | 5  | 12,794,310  | 0.010096 | -0.216 | -0.176 |  |  |  |                  |         |
| cg14494812 | 17 | 48,941,039  | 1.29E-11 | -0.216 | -0.203 |  |  |  | <i>TOB1</i>      | 1stExon |
| cg07199257 | 15 | 78,640,536  | 1.9E-06  | -0.216 | -0.206 |  |  |  | <i>CRABP1</i>    | 3'UTR   |
| cg18472159 | 5  | 3,188,172   | 0.016702 | -0.216 | -0.272 |  |  |  |                  |         |

|            |    |             |          |        |        |            |        |     |                  |         |
|------------|----|-------------|----------|--------|--------|------------|--------|-----|------------------|---------|
| cg20162599 | 11 | 63,990,138  | 0.020738 | -0.216 | -0.207 | 0.00176914 | -0.073 |     | <i>FERMT3</i>    | Body    |
| cg23268879 | 7  | 5,359,951   | 0.000132 | -0.216 | -0.182 |            |        |     | <i>TNRC18</i>    | Body    |
| cg23615488 | 1  | 66,869,943  | 2.66E-12 | -0.216 | -0.207 |            |        |     |                  |         |
| cg15306060 | 22 | 39,712,956  | 2.81E-11 | -0.216 | -0.211 |            |        |     | <i>RPL3</i>      | Body    |
| cg01387036 | 17 | 32,690,255  | 1.67E-08 | -0.216 | -0.180 |            |        |     | <i>CCL1</i>      | TSS200  |
| cg25013044 | 3  | 193,096,009 | 0.036144 | -0.216 | -0.111 |            |        |     | <i>ATP13A5</i>   | Body    |
| cg00232160 | 9  | 129,468,157 | 1.72E-06 | -0.216 | -0.187 |            |        |     |                  |         |
| cg24645149 | 1  | 3,159,083   | 0.01217  | -0.216 | -0.172 |            |        |     | <i>PRDM16</i>    | Body    |
| cg02492873 | 2  | 25,193,821  | 0.000791 | -0.216 | -0.228 |            |        |     | <i>DNAJC27</i>   | Body    |
| cg03970643 | 4  | 23,505,221  | 0.012026 | -0.216 | -0.106 |            |        |     |                  |         |
| cg10481072 | 7  | 92,459,517  | 0.000225 | -0.216 | -0.206 |            |        |     | <i>CDK6</i>      | Body    |
| cg04415689 | 2  | 242,128,250 | 1.36E-07 | -0.216 | -0.173 | 3.05E-25   | -0.187 |     | <i>ANO7</i>      | Body    |
| cg07945618 | 15 | 99,926,398  | 8.79E-08 | -0.216 | -0.186 |            |        |     | <i>LRRC28</i>    | 3'UTR   |
| cg08691775 | 8  | 134,310,658 | 2.1E-11  | -0.216 | -0.206 |            |        |     | <i>NDRG1</i>     | TSS1500 |
| cg09218757 | 15 | 66,944,475  | 0.020563 | -0.216 | -0.140 |            |        |     |                  |         |
| cg18067134 | 3  | 71,084,634  | 7.15E-06 | -0.216 | -0.224 |            |        |     | <i>FOXP1</i>     | Body    |
| cg18740800 | 11 | 27,914,934  | 0.03544  | -0.216 | -0.142 | 0.00000111 | -0.158 |     |                  |         |
| cg15811371 | 19 | 9,093,198   | 0.001164 | -0.216 | -0.188 |            |        |     | <i>MUC16</i>     | TSS1500 |
| cg09538031 | 5  | 41,072,796  | 0.020701 | -0.216 | -0.167 |            |        |     | <i>HEATR7B2</i>  | TSS1500 |
| cg24784129 | 15 | 57,215,558  | 0.000133 | -0.216 | -0.207 |            |        |     | <i>TCF12</i>     | Body    |
| cg12981595 | 17 | 39,254,427  | 1.45E-05 | -0.216 | -0.140 |            |        |     | <i>KRTAP4-8</i>  | TSS200  |
| cg09829888 | 12 | 32,758,168  | 7.71E-06 | -0.216 | -0.202 |            |        |     | <i>FGD4</i>      | Body    |
| cg18029167 | 8  | 110,693,289 | 9.2E-06  | -0.216 | -0.228 |            |        |     | <i>GOLSYN</i>    | 5'UTR   |
| cg19371121 | 1  | 175,050,479 | 0.015299 | -0.216 | -0.169 |            |        |     | <i>TNN</i>       | Body    |
| cg20694666 | 13 | 21,343,614  | 3.19E-08 | -0.216 | -0.191 |            |        | Yes | <i>N6AMT2</i>    | 5'UTR   |
| cg02876191 | 6  | 54,328,858  | 0.005706 | -0.216 | -0.198 |            |        |     |                  |         |
| cg05440289 | 1  | 152,881,119 | 0.006038 | -0.216 | -0.133 | 0.00035855 | -0.114 |     | <i>IVL</i>       | 5'UTR   |
| cg06980460 | 11 | 49,230,548  | 7.25E-05 | -0.216 | -0.188 | 6.03E-11   | -0.213 |     | <i>FOLH1</i>     | TSS1500 |
| cg00434573 | 19 | 2,041,960   | 7.21E-08 | -0.216 | -0.198 |            |        |     | <i>MKNK2</i>     | Body    |
| cg23856293 | 20 | 62,795,341  | 0.014589 | -0.216 | -0.230 |            |        |     | <i>MYT1</i>      | TSS1500 |
| cg26606947 | 10 | 123,781,602 | 8.36E-07 | -0.216 | -0.202 |            |        |     | <i>TACC2</i>     | Body    |
| cg07111988 | 1  | 24,971,764  | 7.01E-06 | -0.216 | -0.215 |            |        |     | <i>SRRM1</i>     | Body    |
| cg21549695 | 5  | 74,333,288  | 1.31E-05 | -0.216 | -0.202 |            |        |     |                  |         |
| cg03684845 | 16 | 4,606,754   | 1.07E-12 | -0.216 | -0.229 |            |        | Yes | <i>LOC342346</i> | 1stExon |



|            |    |             |          |        |        |            |        |     |                  |         |
|------------|----|-------------|----------|--------|--------|------------|--------|-----|------------------|---------|
| cg10893667 | 5  | 111,313,992 | 0.014789 | -0.216 | -0.240 |            |        |     | <i>C5orf13</i>   | TSS1500 |
| cg27015047 | 10 | 124,320,805 | 7.71E-06 | -0.216 | -0.207 | 0.00000112 | -0.121 |     | <i>DMBT1</i>     | Body    |
| cg09180566 | 13 | 24,736,095  | 6.36E-19 | -0.216 | -0.196 |            |        |     | <i>SPATA13</i>   | 5'UTR   |
| cg10785153 | 13 | 48,011,758  | 2.49E-05 | -0.217 | -0.226 |            |        |     |                  |         |
| cg24139898 | 19 | 35,531,817  | 5.82E-05 | -0.217 | -0.200 |            |        |     | <i>HPN</i>       | 5'UTR   |
| cg11020894 | 3  | 186,659,238 | 1.55E-12 | -0.217 | -0.210 |            |        |     | <i>ST6GAL1</i>   | 5'UTR   |
| cg17345276 | 2  | 27,349,220  | 1.56E-06 | -0.217 | -0.211 |            |        | Yes | <i>ABHD1</i>     | Body    |
| cg22575436 | 5  | 31,323,515  | 0.010827 | -0.217 | -0.151 |            |        |     | <i>CDH6</i>      | 3'UTR   |
| cg26794227 | 5  | 169,483,131 | 0.03247  | -0.217 | -0.189 |            |        |     | <i>DOCK2</i>     | Body    |
| cg16734451 | 8  | 32,430,022  | 0.000451 | -0.217 | -0.155 |            |        |     | <i>NRG1</i>      | Body    |
| cg17572903 | 20 | 47,713,223  | 0.004764 | -0.217 | -0.252 |            |        |     | <i>CSE1L</i>     | 3'UTR   |
| cg11737879 | 6  | 143,779,064 | 0.000115 | -0.217 | -0.230 |            |        |     | <i>PEX3</i>      | Body    |
| cg12665414 | 5  | 173,318,755 | 2.37E-07 | -0.217 | -0.207 |            |        |     | <i>CPEB4</i>     | Body    |
| cg01373819 | 15 | 91,209,329  | 4.63E-07 | -0.217 | -0.199 |            |        |     |                  |         |
| cg03768338 | 8  | 76,823,133  | 0.000387 | -0.217 | -0.235 |            |        |     |                  |         |
| cg27287305 | 4  | 100,576,985 | 0.005781 | -0.217 | -0.201 |            |        |     |                  |         |
| cg06154311 | 20 | 61,002,657  | 5.96E-06 | -0.217 | -0.218 |            |        |     | <i>C20orf151</i> | TSS200  |
| cg13804467 | 9  | 28,907,222  | 0.000801 | -0.217 | -0.165 |            |        |     |                  |         |
| cg19942083 | 12 | 7,070,562   | 6.41E-11 | -0.217 | -0.197 |            |        |     |                  |         |
| cg24369233 | 2  | 127,713,082 | 0.000219 | -0.217 | -0.223 |            |        |     |                  |         |
| cg14019464 | 20 | 377,350     | 0.006759 | -0.217 | -0.103 |            |        |     | <i>TRIB3</i>     | 3'UTR   |
| cg03785456 | 2  | 134,255,543 | 0.001756 | -0.217 | -0.292 |            |        |     | <i>NCKAP5</i>    | Body    |
| cg00406188 | 1  | 152,647,216 | 0.044542 | -0.217 | -0.093 | 0.00186677 | -0.101 |     | <i>LCE2C</i>     | TSS1500 |
| cg20597842 | 12 | 7,818,585   | 0.01677  | -0.217 | -0.136 |            |        |     | <i>APOBEC1</i>   | TSS200  |
| cg21186966 | 4  | 5,401,430   | 7.79E-14 | -0.217 | -0.201 |            |        |     | <i>STK32B</i>    | Body    |
| cg06625721 | 12 | 33,205,814  | 0.003438 | -0.217 | -0.186 |            |        |     |                  |         |
| cg08925606 | 20 | 31,595,509  | 6.22E-10 | -0.217 | -0.219 |            |        |     | <i>BPIL1</i>     | 5'UTR   |
| cg18319612 | 1  | 203,257,946 | 1.72E-06 | -0.217 | -0.216 |            |        |     |                  |         |
| cg00215851 | 4  | 46,427,528  | 0.00098  | -0.217 | -0.176 |            |        |     |                  |         |
| cg21334510 | 5  | 1,093,580   | 7.74E-05 | -0.217 | -0.174 |            |        |     | <i>SLC12A7</i>   | Body    |
| cg25767154 | 8  | 145,594,413 | 1.67E-05 | -0.217 | -0.261 |            |        |     |                  |         |
| cg05086987 | 21 | 46,931,501  | 0.001929 | -0.217 | -0.152 |            |        |     | <i>COL18A1</i>   | Body    |
| cg09807227 | 17 | 80,201,957  | 3.9E-05  | -0.217 | -0.202 |            |        |     |                  |         |
| cg22934449 | 14 | 104,199,773 | 0.000166 | -0.217 | -0.198 |            |        |     | <i>ZFYVE21</i>   | 3'UTR   |

|            |    |             |          |        |        |  |  |     |                  |         |
|------------|----|-------------|----------|--------|--------|--|--|-----|------------------|---------|
| cg18051316 | 6  | 31,925,660  | 5.81E-08 | -0.217 | -0.215 |  |  |     | <i>RDBP</i>      | Body    |
| cg23112423 | 7  | 10,516,354  | 0.013969 | -0.217 | -0.172 |  |  |     |                  |         |
| cg16262284 | 3  | 182,987,901 | 0.003505 | -0.217 | -0.216 |  |  |     | <i>MCF2L2</i>    | Body    |
| cg16854200 | 12 | 5,603,261   | 0.002209 | -0.217 | -0.171 |  |  |     | <i>NTF3</i>      | TSS200  |
| cg00246486 | 3  | 112,642,487 | 0.00084  | -0.217 | -0.163 |  |  |     | <i>CD200R1</i>   | 3'UTR   |
| cg09820557 | 17 | 8,249,349   | 3.91E-05 | -0.217 | -0.203 |  |  |     | <i>ODF4</i>      | 3'UTR   |
| cg16819051 | 2  | 229,173,235 | 2.67E-05 | -0.217 | -0.223 |  |  |     |                  |         |
| cg16179938 | 18 | 77,277,583  | 0.026643 | -0.217 | -0.219 |  |  |     | <i>NFATC1</i>    | Body    |
| cg21484315 | 2  | 2,712,669   | 1.98E-06 | -0.217 | -0.170 |  |  |     |                  |         |
| cg15814750 | 15 | 53,880,678  | 0.02689  | -0.217 | -0.164 |  |  |     | <i>WDR72</i>     | Body    |
| cg02960488 | 3  | 178,863,507 | 8.36E-07 | -0.217 | -0.206 |  |  |     |                  |         |
| cg05626536 | 8  | 144,801,088 | 1.68E-06 | -0.217 | -0.217 |  |  | Yes | <i>MAPK15</i>    | Body    |
| cg22726414 | 8  | 3,316,819   | 0.038817 | -0.217 | -0.105 |  |  |     | <i>CSMD1</i>     | Body    |
| cg14898232 | 2  | 201,124,405 | 5.79E-06 | -0.217 | -0.214 |  |  |     |                  |         |
| cg09140665 | 11 | 7,960,899   | 0.00324  | -0.217 | -0.204 |  |  |     | <i>OR10A3</i>    | 1stExon |
| cg17913347 | 2  | 98,357,103  | 0.000555 | -0.217 | -0.155 |  |  |     |                  |         |
| cg24212047 | 11 | 121,973,805 | 0.040416 | -0.217 | -0.159 |  |  |     | <i>LOC399959</i> | Body    |
| cg09577324 | 11 | 6,890,860   | 0.032948 | -0.217 | -0.222 |  |  |     | <i>OR10A2</i>    | TSS200  |
| cg13364075 | 7  | 157,320,369 | 0.001398 | -0.217 | -0.150 |  |  |     |                  |         |
| cg17721480 | 4  | 187,619,391 | 0.000604 | -0.217 | -0.227 |  |  |     | <i>FAT1</i>      | Body    |
| cg14898127 | 15 | 81,587,493  | 0.000597 | -0.217 | -0.241 |  |  |     | <i>IL16</i>      | Body    |
| cg21296602 | 11 | 93,476,060  | 0.002938 | -0.217 | -0.110 |  |  |     | <i>TAF1D</i>     | TSS1500 |
| cg22692725 | 3  | 52,722,452  | 0.000155 | -0.217 | -0.218 |  |  |     | <i>GNL3</i>      | Body    |
| cg25577367 | 11 | 123,676,979 | 0.010775 | -0.217 | -0.199 |  |  |     | <i>OR6M1</i>     | 1stExon |
| cg13712197 | 12 | 124,844,874 | 2.29E-07 | -0.217 | -0.190 |  |  |     | <i>NCOR2</i>     | Body    |
| cg24947212 | 10 | 127,999,713 | 6.99E-07 | -0.217 | -0.200 |  |  |     | <i>ADAM12</i>    | Body    |
| cg17887364 | 8  | 37,891,957  | 0.0016   | -0.217 | -0.199 |  |  | Yes | <i>EIF4EBP1</i>  | Body    |
| cg02154084 | 5  | 146,184,364 | 0.015783 | -0.217 | -0.272 |  |  |     | <i>PPP2R2B</i>   | Body    |
| cg24614200 | 13 | 19,967,206  | 0.000341 | -0.217 | -0.166 |  |  |     |                  |         |
| cg18065599 | 11 | 47,968,995  | 1.15E-09 | -0.217 | -0.217 |  |  |     |                  |         |
| cg18640098 | 5  | 9,888,660   | 0.027329 | -0.217 | -0.156 |  |  |     | <i>LOC285692</i> | Body    |
| cg23719663 | X  | 71,093,852  | 0.016801 | -0.217 | -0.202 |  |  |     |                  |         |
| cg01229998 | 11 | 60,049,447  | 0.0018   | -0.217 | -0.211 |  |  |     | <i>MS4A4A</i>    | Body    |
| cg04839975 | 3  | 193,656,618 | 0.000462 | -0.217 | -0.195 |  |  |     |                  |         |

|            |    |             |          |        |        |  |  |     |                 |         |
|------------|----|-------------|----------|--------|--------|--|--|-----|-----------------|---------|
| cg08394602 | 19 | 22,123,885  | 0.000773 | -0.217 | -0.206 |  |  |     |                 |         |
| cg23990124 | 7  | 63,639,860  | 0.049155 | -0.217 | -0.124 |  |  |     |                 |         |
| cg06576783 | 6  | 53,572,893  | 3.45E-06 | -0.217 | -0.167 |  |  |     |                 |         |
| cg21565960 | 11 | 61,793,285  | 8.58E-05 | -0.217 | -0.230 |  |  |     |                 |         |
| cg06500134 | 2  | 11,822,560  | 6.37E-05 | -0.217 | -0.173 |  |  |     |                 |         |
| cg15461017 | 12 | 34,519,837  | 6.56E-09 | -0.217 | -0.209 |  |  |     |                 |         |
| cg14283447 | 21 | 43,735,412  | 1.93E-06 | -0.217 | -0.187 |  |  |     | <i>TFF3</i>     | 1stExon |
| cg18485530 | 13 | 59,547,037  | 0.000393 | -0.217 | -0.204 |  |  |     |                 |         |
| cg17667625 | 8  | 134,224,711 | 0.003007 | -0.217 | -0.247 |  |  |     | <i>WISP1</i>    | Body    |
| cg20533982 | 7  | 158,533,927 | 0.002921 | -0.217 | -0.197 |  |  |     | <i>ESYT2</i>    | Body    |
| cg08315399 | 14 | 76,298,938  | 1.37E-06 | -0.217 | -0.194 |  |  |     | <i>TLL5</i>     | Body    |
| cg09174555 | 1  | 153,364,020 | 1.97E-06 | -0.217 | -0.186 |  |  |     | <i>S100A8</i>   | TSS1500 |
| cg06389098 | 16 | 71,424,252  | 2.23E-05 | -0.217 | -0.205 |  |  |     | <i>CALB2</i>    | Body    |
| cg09828010 | 5  | 173,533,377 | 0.011382 | -0.217 | -0.249 |  |  |     | <i>HMP19</i>    | Body    |
| cg25144149 | 10 | 133,317,423 | 0.019622 | -0.217 | -0.104 |  |  |     |                 |         |
| cg24645447 | 1  | 243,426,679 | 0.0008   | -0.217 | -0.199 |  |  |     | <i>SDCCAG8</i>  | Body    |
| cg27582081 | 3  | 119,294,816 | 1.17E-08 | -0.217 | -0.200 |  |  |     |                 |         |
| cg26317899 | 17 | 35,527,041  | 0.00015  | -0.217 | -0.190 |  |  | Yes | <i>ACACA</i>    | Body    |
| cg06417570 | 16 | 31,828,859  | 0.011531 | -0.217 | -0.215 |  |  |     |                 |         |
| cg06848199 | 16 | 77,983,066  | 0.000635 | -0.217 | -0.145 |  |  |     | <i>VAT1L</i>    | Body    |
| cg16169950 | 5  | 165,412     | 0.000255 | -0.217 | -0.297 |  |  |     | <i>PLEKHG4B</i> | Body    |
| cg08447373 | 5  | 90,478,943  | 0.034311 | -0.217 | -0.089 |  |  |     |                 |         |
| cg09194202 | 11 | 103,910,096 | 0.004429 | -0.217 | -0.184 |  |  |     | <i>PDGFD</i>    | Body    |
| cg12080079 | 1  | 19,007,925  | 0.004368 | -0.217 | -0.108 |  |  |     | <i>PAX7</i>     | Body    |
| cg14313576 | 3  | 134,339,988 | 0.006141 | -0.217 | -0.259 |  |  |     | <i>KY</i>       | Body    |
| cg17444747 | 5  | 177,915,909 | 1.13E-05 | -0.217 | -0.234 |  |  |     | <i>COL23A1</i>  | Body    |
| cg17036744 | 3  | 56,717,720  | 0.002494 | -0.217 | -0.245 |  |  |     | <i>C3orf63</i>  | TSS1500 |
| cg26075408 | 2  | 203,006,406 | 0.00024  | -0.217 | -0.137 |  |  |     |                 |         |
| cg20642115 | 10 | 134,316,586 | 0.021765 | -0.217 | -0.041 |  |  |     |                 |         |
| cg25072766 | 11 | 3,073,488   | 2.2E-09  | -0.217 | -0.243 |  |  |     | <i>CARS</i>     | Body    |
| cg20530843 | 3  | 9,976,241   | 3.31E-08 | -0.217 | -0.195 |  |  |     | <i>CRELD1</i>   | Body    |
| cg01841050 | 17 | 39,539,863  | 0.010127 | -0.217 | -0.115 |  |  | Yes | <i>KRT34</i>    | TSS1500 |
| cg13812570 | X  | 144,327,920 | 0.002918 | -0.217 | -0.203 |  |  |     | <i>SPANXN1</i>  | TSS1500 |
| cg22203867 | 5  | 171,621,698 | 0.001356 | -0.217 | -0.194 |  |  |     | <i>EFCAB9</i>   | Body    |

|            |    |             |          |        |        |          |        |     |                  |         |
|------------|----|-------------|----------|--------|--------|----------|--------|-----|------------------|---------|
| cg09667753 | 11 | 50,239,550  | 5.87E-08 | -0.217 | -0.204 |          |        |     | <i>LOC441601</i> | Body    |
| cg14814536 | 11 | 22,648,107  | 0.000104 | -0.217 | -0.248 |          |        |     | <i>FANCF</i>     | TSS1500 |
| cg17120792 | 11 | 55,705,284  | 0.002284 | -0.217 | -0.166 |          |        |     | <i>OR5I1</i>     | TSS1500 |
| cg03673094 | 11 | 76,391,253  | 0.003444 | -0.217 | -0.149 |          |        |     | <i>GUCY2E</i>    | Body    |
| cg25122369 | 3  | 168,801,790 | 0.000495 | -0.217 | -0.131 |          |        |     | <i>MECOM</i>     | 3'UTR   |
| cg05462446 | 16 | 77,574,072  | 0.003033 | -0.217 | -0.163 |          |        |     |                  |         |
| cg18512205 | 15 | 40,183,559  | 5.34E-12 | -0.217 | -0.219 |          |        |     | <i>GPR176</i>    | Body    |
| cg19540371 | 5  | 13,945,611  | 0.000529 | -0.217 | -0.204 |          |        |     | <i>DNAH5</i>     | TSS1500 |
| cg22150051 | 20 | 23,499,697  | 0.045203 | -0.217 | -0.159 |          |        |     | <i>CSTT</i>      | TSS200  |
| cg08596618 | 1  | 24,275,885  | 0.003951 | -0.217 | -0.124 |          |        |     |                  |         |
| cg15718811 | 8  | 120,427,810 | 3.95E-05 | -0.217 | -0.219 |          |        |     | <i>NOV</i>       | TSS1500 |
| cg18502477 | 11 | 57,946,199  | 0.000904 | -0.217 | -0.153 |          |        |     | <i>OR9Q1</i>     | 5'UTR   |
| cg20469625 | 8  | 106,582,085 | 0.034932 | -0.217 | -0.228 |          |        |     | <i>ZFPM2</i>     | Body    |
| cg19103704 | 19 | 40,440,963  | 9.82E-07 | -0.217 | -0.183 | 1.58E-12 | -0.120 |     | <i>FCGBP</i>     | TSS1500 |
| cg22836134 | 14 | 75,647,041  | 0.000481 | -0.217 | -0.191 |          |        |     |                  |         |
| cg01264963 | 11 | 123,885,967 | 5.62E-11 | -0.217 | -0.213 |          |        |     | <i>OR10G4</i>    | TSS1500 |
| cg01454540 | 10 | 134,782,773 | 1.65E-05 | -0.217 | -0.173 |          |        |     |                  |         |
| cg04231701 | 4  | 1,032,855   | 8.8E-09  | -0.217 | -0.204 |          |        |     |                  |         |
| cg18268948 | 7  | 2,113,694   | 3.45E-07 | -0.217 | -0.201 |          |        |     | <i>MAD1L1</i>    | Body    |
| cg25719521 | 2  | 192,742,700 | 0.000251 | -0.217 | -0.143 |          |        |     |                  |         |
| cg12115882 | 11 | 133,449,267 | 0.026205 | -0.217 | -0.156 |          |        |     |                  |         |
| cg26275841 | 14 | 103,040,826 | 0.000523 | -0.217 | -0.173 |          |        |     |                  |         |
| cg13430173 | 9  | 112,914,149 | 1.03E-10 | -0.217 | -0.200 |          |        |     | <i>AKAP2</i>     | Body    |
| cg25362714 | 22 | 32,804,978  | 0.00829  | -0.217 | -0.177 |          |        |     | <i>C22orf28</i>  | Body    |
| cg14660328 | 11 | 79,878,290  | 4.46E-10 | -0.217 | -0.228 |          |        |     |                  |         |
| cg04988729 | 11 | 606,583     | 1.73E-11 | -0.217 | -0.202 |          |        |     | <i>PHRF1</i>     | Body    |
| cg22792461 | 10 | 97,850,322  | 0.005879 | -0.217 | -0.234 |          |        |     |                  |         |
| cg26977737 | 21 | 22,175,522  | 0.007091 | -0.217 | -0.176 |          |        |     | <i>C21orf131</i> | TSS200  |
| cg01102471 | 2  | 58,584,770  | 0.003098 | -0.217 | -0.201 |          |        | Yes |                  |         |
| cg09300089 | 16 | 89,539,230  | 2.38E-08 | -0.217 | -0.200 |          |        |     | <i>ANKRD11</i>   | 5'UTR   |
| cg14856914 | 10 | 86,018,582  | 0.001045 | -0.217 | -0.176 |          |        |     | <i>RGR</i>       | 3'UTR   |
| cg26306530 | 13 | 60,053,952  | 0.028354 | -0.217 | -0.207 |          |        |     |                  |         |
| cg04287755 | 1  | 2,732,366   | 0.000722 | -0.218 | -0.191 |          |        |     |                  |         |
| cg10976311 | 5  | 152,591,026 | 9.1E-05  | -0.218 | -0.207 |          |        |     |                  |         |

|            |    |             |          |        |        |            |        |     |                 |         |
|------------|----|-------------|----------|--------|--------|------------|--------|-----|-----------------|---------|
| cg26552067 | 12 | 131,747,296 | 0.018247 | -0.218 | -0.140 |            |        |     |                 |         |
| cg08327428 | 10 | 109,641,026 | 0.000142 | -0.218 | -0.208 |            |        |     |                 |         |
| cg15821546 | 6  | 31,843,465  | 4.44E-11 | -0.218 | -0.213 |            |        |     | <i>SLC44A4</i>  | Body    |
| cg25837904 | 4  | 154,167,187 | 9.4E-08  | -0.218 | -0.204 |            |        |     | <i>TRIM2</i>    | Body    |
| cg10369242 | 12 | 52,625,486  | 1.78E-05 | -0.218 | -0.221 |            |        |     | <i>KRT7</i>     | TSS1500 |
| cg23629187 | 8  | 125,576,109 | 3.86E-07 | -0.218 | -0.219 |            |        |     | <i>MTSS1</i>    | Body    |
| cg27188860 | 8  | 33,801,282  | 1.5E-05  | -0.218 | -0.167 |            |        |     |                 |         |
| cg06083483 | 17 | 32,646,006  | 5.81E-07 | -0.218 | -0.203 |            |        |     | <i>CCL8</i>     | TSS200  |
| cg07588439 | 2  | 198,571,554 | 5.8E-07  | -0.218 | -0.199 |            |        |     | <i>MARS2</i>    | 1stExon |
| cg11373895 | 2  | 78,545,567  | 0.028813 | -0.218 | -0.201 |            |        |     |                 |         |
| cg21177502 | 8  | 50,968,578  | 0.000343 | -0.218 | -0.207 |            |        |     | <i>SNTG1</i>    | 5'UTR   |
| cg00050133 | 4  | 178,167,583 | 0.001613 | -0.218 | -0.150 |            |        |     |                 |         |
| cg00213668 | 7  | 98,028,207  | 1.42E-09 | -0.218 | -0.225 |            |        |     | <i>BAIAP2L1</i> | Body    |
| cg01589580 | 18 | 77,440,800  | 8.22E-08 | -0.218 | -0.218 | 2.8E-12    | -0.079 |     | <i>CTDP1</i>    | Body    |
| cg05594286 | 16 | 86,840,467  | 0.002276 | -0.218 | -0.252 |            |        |     |                 |         |
| cg10640284 | 20 | 13,971,811  | 1.69E-05 | -0.218 | -0.211 |            |        |     | <i>SEL1L2</i>   | TSS1500 |
| cg13640423 | 3  | 120,412,084 | 0.00135  | -0.218 | -0.255 |            |        |     | <i>RABL3</i>    | Body    |
| cg06127719 | 18 | 11,150,784  | 0.000608 | -0.218 | -0.201 |            |        |     |                 |         |
| cg10720545 | 19 | 45,504,295  | 5.6E-06  | -0.218 | -0.171 |            |        |     | <i>RELB</i>     | TSS1500 |
| cg17761538 | 8  | 145,753,477 | 0.01725  | -0.218 | -0.171 |            |        |     | <i>MGC70857</i> | Body    |
| cg18162059 | 4  | 5,405,706   | 0.014446 | -0.218 | -0.151 |            |        |     | <i>STK32B</i>   | Body    |
| cg07700925 | 10 | 129,540,267 | 2.35E-05 | -0.218 | -0.159 |            |        |     |                 |         |
| cg13085403 | 1  | 232,901,128 | 6.45E-08 | -0.218 | -0.193 |            |        |     |                 |         |
| cg21166999 | 6  | 117,746,793 | 2.28E-06 | -0.218 | -0.191 | 0.00000855 | -0.099 |     | <i>ROS1</i>     | 1stExon |
| cg00641679 | 8  | 94,230,311  | 0.006769 | -0.218 | -0.201 |            |        |     |                 |         |
| cg04960007 | 17 | 5,820,294   | 0.001928 | -0.218 | -0.156 |            |        |     |                 |         |
| cg05331214 | 2  | 167,343,774 | 0.045076 | -0.218 | -0.150 | 4.65E-16   | -0.168 |     | <i>SCN7A</i>    | TSS1500 |
| cg09904358 | 10 | 24,446,911  | 0.000192 | -0.218 | -0.219 |            |        |     | <i>KIAA1217</i> | 5'UTR   |
| cg15015426 | 1  | 159,506,559 | 4.28E-11 | -0.218 | -0.215 |            |        |     | <i>OR10J5</i>   | TSS1500 |
| cg22127773 | 17 | 7,754,785   | 0.01941  | -0.218 | -0.108 |            |        |     | <i>KDM6B</i>    | Body    |
| cg02870485 | 17 | 14,891,458  | 0.013491 | -0.218 | -0.098 |            |        | Yes |                 |         |
| cg04133673 | 2  | 142,890,490 | 0.000731 | -0.218 | -0.194 |            |        |     | <i>LRP1B</i>    | TSS1500 |
| cg08688636 | 7  | 31,935,390  | 0.001897 | -0.218 | -0.152 |            |        |     | <i>PDE1C</i>    | Body    |
| cg16759787 | 14 | 85,667,733  | 0.007617 | -0.218 | -0.182 |            |        |     |                 |         |

|            |    |             |          |        |        |          |        |     |                  |         |
|------------|----|-------------|----------|--------|--------|----------|--------|-----|------------------|---------|
| cg15285975 | 3  | 146,498,234 | 5.08E-06 | -0.218 | -0.236 |          |        |     |                  |         |
| cg19621065 | 15 | 92,459,857  | 0.000239 | -0.218 | -0.177 |          |        |     | <i>SLCO3A1</i>   | Body    |
| cg22635088 | 5  | 2,096,922   | 1.02E-05 | -0.218 | -0.168 |          |        |     |                  |         |
| cg10023915 | 11 | 9,772,285   | 1.21E-10 | -0.218 | -0.210 |          |        |     | <i>SWAP70</i>    | 3'UTR   |
| cg24359868 | 21 | 30,261,524  | 0.023929 | -0.218 | -0.143 |          |        |     |                  |         |
| cg17980364 | 11 | 86,748,241  | 1.28E-06 | -0.218 | -0.217 |          |        |     | <i>TMEM135</i>   | TSS1500 |
| cg06528591 | 12 | 131,978,899 | 0.005467 | -0.218 | -0.161 |          |        |     |                  |         |
| cg14074184 | 10 | 133,837,230 | 5.35E-15 | -0.218 | -0.207 |          |        |     |                  |         |
| cg20624429 | 11 | 122,471,331 | 0.027265 | -0.218 | -0.115 |          |        | Yes |                  |         |
| cg23575688 | 11 | 119,486,443 | 9.45E-07 | -0.218 | -0.176 |          |        |     |                  |         |
| cg17759816 | 19 | 1,313,033   | 1.64E-05 | -0.218 | -0.180 |          |        |     |                  |         |
| cg06966245 | 1  | 30,043,002  | 0.036698 | -0.218 | -0.127 |          |        |     |                  |         |
| cg13676215 | 7  | 17,337,976  | 8.97E-12 | -0.218 | -0.225 |          |        |     | <i>AHR</i>       | TSS1500 |
| cg03782437 | 11 | 71,295,908  | 0.000301 | -0.218 | -0.141 |          |        |     |                  |         |
| cg16663980 | 1  | 158,809,049 | 0.033607 | -0.218 | -0.272 |          |        |     | <i>MNDA</i>      | 5'UTR   |
| cg00169419 | 4  | 111,530,900 | 0.041309 | -0.218 | -0.100 |          |        |     |                  |         |
| cg01243226 | X  | 15,807,818  | 0.000111 | -0.218 | -0.200 |          |        |     | <i>ZRSR2</i>     | TSS1500 |
| cg01571491 | 17 | 72,440,050  | 0.000976 | -0.218 | -0.121 |          |        |     | <i>GPRC5C</i>    | Body    |
| cg02537838 | 20 | 61,002,595  | 7.88E-05 | -0.218 | -0.231 | 1.11E-07 | -0.075 |     | <i>C20orf151</i> | TSS200  |
| cg08038219 | 20 | 62,031,924  | 0.000605 | -0.218 | -0.204 |          |        |     |                  |         |
| cg16660394 | 16 | 19,089,709  | 4.55E-09 | -0.218 | -0.219 |          |        |     | <i>COQ7</i>      | 3'UTR   |
| cg21292473 | 1  | 181,683,239 | 0.009077 | -0.218 | -0.272 |          |        |     | <i>CACNA1E</i>   | Body    |
| cg12496211 | 12 | 2,193,060   | 6.67E-15 | -0.218 | -0.203 |          |        |     | <i>CACNA1C</i>   | Body    |
| cg17633170 | 12 | 131,217,151 | 0.014349 | -0.218 | -0.149 |          |        |     |                  |         |
| cg21295827 | 1  | 178,708,719 | 0.038989 | -0.218 | -0.064 |          |        |     | <i>RALGPS2</i>   | 5'UTR   |
| cg23216731 | 8  | 130,832,237 | 0.000247 | -0.218 | -0.127 |          |        |     |                  |         |
| cg24629972 | 8  | 43,147,439  | 0.027718 | -0.218 | -0.190 |          |        |     | <i>POTEA</i>     | TSS200  |
| cg09815642 | 16 | 59,602,460  | 0.001362 | -0.218 | -0.182 |          |        |     |                  |         |
| cg12599765 | 4  | 112,729,702 | 0.000685 | -0.218 | -0.163 |          |        |     |                  |         |
| cg15846556 | 8  | 13,735,387  | 1.03E-07 | -0.218 | -0.203 |          |        |     |                  |         |
| cg20169766 | 1  | 66,747,598  | 8.04E-09 | -0.218 | -0.212 |          |        |     | <i>PDE4B</i>     | Body    |
| cg02307277 | 6  | 150,690,125 | 1.28E-10 | -0.218 | -0.197 |          |        |     | <i>IYD</i>       | 5'UTR   |
| cg20743662 | 3  | 38,589,496  | 0.022668 | -0.218 | -0.143 |          |        |     |                  |         |
| cg03583746 | 6  | 1,604,013   | 2.03E-05 | -0.218 | -0.196 |          |        |     |                  |         |

|            |    |             |          |        |        |            |        |     |                  |         |
|------------|----|-------------|----------|--------|--------|------------|--------|-----|------------------|---------|
| cg02936593 | 11 | 45,734,486  | 5.74E-05 | -0.218 | -0.231 |            |        |     |                  |         |
| cg07100532 | 18 | 713,085     | 0.000286 | -0.218 | -0.254 |            |        |     | <i>ENOSF1</i>    | TSS1500 |
| cg00606396 | 5  | 19,531,574  | 2.13E-05 | -0.218 | -0.230 |            |        |     | <i>CDH18</i>     | Body    |
| cg02442572 | 7  | 1,303,351   | 6.92E-05 | -0.218 | -0.219 |            |        |     |                  |         |
| cg15441416 | 19 | 54,972,047  | 0.007154 | -0.218 | -0.176 |            |        |     | <i>LENG8</i>     | Body    |
| cg21680327 | 1  | 36,108,225  | 0.002713 | -0.218 | -0.182 |            |        |     | <i>PSMB2</i>     | TSS1500 |
| cg00334941 | 3  | 146,964,907 | 8.51E-07 | -0.218 | -0.251 |            |        |     |                  |         |
| cg01323371 | 3  | 179,667,823 | 0.018093 | -0.218 | -0.158 |            |        | Yes | <i>PEX5L</i>     | Body    |
| cg24786174 | 18 | 74,118,243  | 1.59E-05 | -0.218 | -0.200 |            |        |     | <i>ZNF516</i>    | Body    |
| cg24984506 | 3  | 135,086,818 | 0.016937 | -0.218 | -0.266 |            |        |     |                  |         |
| cg06252455 | 12 | 38,558,124  | 8.9E-05  | -0.218 | -0.193 |            |        |     |                  |         |
| cg06919312 | 12 | 64,474,195  | 0.000494 | -0.218 | -0.177 |            |        |     | <i>SRGAP1</i>    | Body    |
| cg07234199 | 20 | 37,059,825  | 0.006788 | -0.218 | -0.147 |            |        |     | <i>LOC388796</i> | Body    |
| cg13724820 | 2  | 44,104,732  | 0.000465 | -0.218 | -0.190 |            |        |     | <i>ABCG8</i>     | Body    |
| cg27041655 | 5  | 87,733,473  | 0.000586 | -0.218 | -0.172 |            |        |     |                  |         |
| cg05376362 | 6  | 74,826,447  | 0.003861 | -0.218 | -0.269 |            |        |     |                  |         |
| cg25232786 | 3  | 161,138,842 | 2.76E-05 | -0.218 | -0.228 |            |        |     |                  |         |
| cg27168033 | 19 | 3,983,219   | 4.7E-10  | -0.218 | -0.197 |            |        |     | <i>EEF2</i>      | Body    |
| cg05193162 | 12 | 101,604,787 | 0.00112  | -0.218 | -0.168 |            |        |     | <i>SLC5A8</i>    | TSS1500 |
| cg06855422 | 4  | 94,566,151  | 0.005573 | -0.218 | -0.175 |            |        | Yes | <i>GRID2</i>     | Body    |
| cg10002131 | 19 | 53,794,492  | 0.002812 | -0.218 | -0.154 |            |        |     | <i>BIRC8</i>     | 5'UTR   |
| cg19614643 | 2  | 19,499,118  | 0.000245 | -0.218 | -0.252 |            |        |     |                  |         |
| cg27244482 | 5  | 149,669,488 | 9.98E-06 | -0.218 | -0.227 | 0.00000131 | -0.123 |     | <i>CAMK2A</i>    | TSS200  |
| cg03943115 | 1  | 153,014,367 | 1.88E-05 | -0.218 | -0.187 |            |        |     | <i>SPRR2D</i>    | TSS1500 |
| cg07695603 | X  | 150,399,990 | 0.027313 | -0.218 | -0.137 |            |        |     |                  |         |
| cg11039314 | 7  | 16,921,699  | 0.026825 | -0.218 | -0.235 |            |        |     | <i>AGR3</i>      | TSS200  |
| cg09627060 | 10 | 134,875,916 | 0.002275 | -0.218 | -0.209 |            |        |     |                  |         |
| cg03084648 | 8  | 23,429,119  | 0.000171 | -0.218 | -0.200 |            |        |     | <i>SLC25A37</i>  | Body    |
| cg05402622 | 16 | 86,666,183  | 0.024773 | -0.218 | -0.125 |            |        |     |                  |         |
| cg16710042 | 2  | 165,760,725 | 1.17E-07 | -0.218 | -0.187 |            |        |     | <i>SLC38A11</i>  | Body    |
| cg10651502 | 4  | 46,738,197  | 0.03919  | -0.218 | -0.102 |            |        |     | <i>COX7B2</i>    | 5'UTR   |
| cg16237191 | 12 | 55,945,613  | 0.002757 | -0.218 | -0.180 |            |        |     | <i>OR6C4</i>     | 1stExon |
| cg00534479 | 5  | 168,196,464 | 0.002873 | -0.218 | -0.135 |            |        |     | <i>SLIT3</i>     | Body    |
| cg04548096 | 6  | 133,691,357 | 0.020662 | -0.218 | -0.100 |            |        |     | <i>EYA4</i>      | Body    |

|            |    |             |          |        |        |  |  |     |                   |         |
|------------|----|-------------|----------|--------|--------|--|--|-----|-------------------|---------|
| cg04876407 | 2  | 134,781,671 | 0.013027 | -0.218 | -0.146 |  |  |     |                   |         |
| cg17512522 | 20 | 6,195,391   | 0.041318 | -0.218 | -0.109 |  |  |     |                   |         |
| cg26247795 | 21 | 14,407,237  | 0.018847 | -0.218 | -0.189 |  |  | Yes |                   |         |
| cg27570873 | 10 | 135,029,717 | 0.006371 | -0.218 | -0.099 |  |  |     | <i>KNDC1</i>      | Body    |
| cg19829001 | 17 | 74,640,078  | 4.33E-05 | -0.218 | -0.203 |  |  |     | <i>ST6GALNAC1</i> | TSS200  |
| cg00381745 | 7  | 99,096,450  | 0.000286 | -0.218 | -0.251 |  |  |     | <i>ZNF394</i>     | Body    |
| cg01282725 | 12 | 1,645,963   | 1.05E-07 | -0.218 | -0.203 |  |  |     |                   |         |
| cg14086922 | 22 | 18,268,239  | 2.01E-06 | -0.218 | -0.223 |  |  |     |                   |         |
| cg09554339 | 19 | 43,442,693  | 0.013845 | -0.218 | -0.248 |  |  |     | <i>PSG7</i>       | TSS1500 |
| cg04181079 | 11 | 104,896,587 | 0.000626 | -0.218 | -0.173 |  |  |     | <i>CASP1</i>      | 3'UTR   |
| cg05320945 | 19 | 14,911,751  | 0.004291 | -0.218 | -0.132 |  |  |     | <i>OR7C1</i>      | TSS1500 |
| cg10019467 | 4  | 40,632,788  | 2.01E-05 | -0.218 | -0.224 |  |  |     | <i>RBM47</i>      | TSS1500 |
| cg17736285 | 17 | 44,347,643  | 2.21E-06 | -0.218 | -0.210 |  |  |     |                   |         |
| cg03023152 | 8  | 102,505,556 | 3.54E-15 | -0.218 | -0.221 |  |  |     | <i>GRHL2</i>      | Body    |
| cg10488012 | 5  | 3,306,368   | 0.010983 | -0.218 | -0.127 |  |  |     |                   |         |
| cg12904891 | 1  | 155,901,756 | 5.07E-05 | -0.218 | -0.156 |  |  |     | <i>KIAA0907</i>   | Body    |
| cg05012620 | 17 | 47,886,433  | 1.72E-09 | -0.218 | -0.242 |  |  |     | <i>MYST2</i>      | Body    |
| cg10623221 | 3  | 173,119,212 | 0.002953 | -0.218 | -0.225 |  |  |     | <i>NLGN1</i>      | 5'UTR   |
| cg01181150 | 7  | 154,407,878 | 0.035227 | -0.218 | -0.124 |  |  |     | <i>DPP6</i>       | Body    |
| cg17081914 | 2  | 134,326,366 | 2.46E-09 | -0.218 | -0.233 |  |  |     | <i>NCKAP5</i>     | TSS1500 |
| cg05304729 | 1  | 158,800,024 | 0.029665 | -0.218 | -0.294 |  |  |     | <i>MNDA</i>       | TSS1500 |
| cg22069749 | 20 | 62,111,366  | 3.67E-20 | -0.218 | -0.225 |  |  |     |                   |         |
| cg03424602 | 12 | 121,687,747 | 0.003688 | -0.218 | -0.166 |  |  |     | <i>CAMKK2</i>     | Body    |
| cg21443274 | 8  | 106,782,921 | 0.000117 | -0.219 | -0.231 |  |  |     | <i>ZFPM2</i>      | Body    |
| cg22287731 | 11 | 55,066,025  | 0.006719 | -0.219 | -0.146 |  |  |     |                   |         |
| cg11150520 | 1  | 157,660,319 | 0.03205  | -0.219 | -0.134 |  |  |     | <i>FCRL3</i>      | Body    |
| cg26192689 | 2  | 206,730,773 | 1.9E-12  | -0.219 | -0.215 |  |  |     |                   |         |
| cg00425678 | 13 | 81,226,644  | 4.5E-07  | -0.219 | -0.237 |  |  | Yes |                   |         |
| cg08279693 | 1  | 152,657,950 | 0.038416 | -0.219 | -0.095 |  |  |     | <i>LCE2B</i>      | TSS1500 |
| cg14966325 | 1  | 153,029,005 | 0.019235 | -0.219 | -0.177 |  |  |     | <i>SPRR2A</i>     | Body    |
| cg16404898 | 5  | 161,111,187 | 0.008629 | -0.219 | -0.220 |  |  |     | <i>GABRA6</i>     | TSS1500 |
| cg24687276 | 15 | 89,163,928  | 5.67E-06 | -0.219 | -0.218 |  |  |     | <i>AEN</i>        | TSS1500 |
| cg23883265 | 2  | 133,039,779 | 0.00017  | -0.219 | -0.157 |  |  |     |                   |         |
| cg01130157 | 7  | 157,111,309 | 1.46E-08 | -0.219 | -0.193 |  |  |     |                   |         |



|            |    |             |          |        |        |  |  |  |                  |         |
|------------|----|-------------|----------|--------|--------|--|--|--|------------------|---------|
| cg13066693 | 14 | 76,878,042  | 5.37E-05 | -0.219 | -0.200 |  |  |  | <i>ESRRB</i>     | 5'UTR   |
| cg08467103 | 2  | 65,593,933  | 2.94E-22 | -0.219 | -0.201 |  |  |  | <i>SPRED2</i>    | TSS200  |
| cg09736361 | 2  | 242,833,228 | 0.000135 | -0.219 | -0.200 |  |  |  |                  |         |
| cg18177920 | 11 | 5,956,787   | 0.007697 | -0.219 | -0.182 |  |  |  |                  |         |
| cg25054821 | 12 | 119,216,236 | 0.005797 | -0.219 | -0.204 |  |  |  |                  |         |
| cg03904711 | 3  | 118,865,255 | 1.34E-06 | -0.219 | -0.183 |  |  |  | <i>C3orf30</i>   | 1stExon |
| cg12387464 | 11 | 123,775,935 | 3.35E-05 | -0.219 | -0.200 |  |  |  | <i>OR8D4</i>     | TSS1500 |
| cg27304952 | 12 | 52,077,539  | 1.21E-07 | -0.219 | -0.201 |  |  |  | <i>SCN8A</i>     | Body    |
| cg23517941 | 20 | 62,052,997  | 3.91E-05 | -0.219 | -0.129 |  |  |  | <i>KCNQ2</i>     | Body    |
| cg11479568 | 8  | 41,522,951  | 1.21E-06 | -0.219 | -0.208 |  |  |  | <i>ANK1</i>      | TSS200  |
| cg16663645 | 3  | 116,639,591 | 0.000135 | -0.219 | -0.225 |  |  |  |                  |         |
| cg17277939 | 12 | 70,093,008  | 0.000106 | -0.219 | -0.217 |  |  |  | <i>BEST3</i>     | 1stExon |
| cg19235974 | 12 | 1,063,197   | 0.004135 | -0.219 | -0.155 |  |  |  |                  |         |
| cg19071976 | 6  | 32,026,656  | 0.002311 | -0.219 | -0.173 |  |  |  | <i>TNXB</i>      | Body    |
| cg21214566 | 9  | 138,549,731 | 0.014058 | -0.219 | -0.135 |  |  |  |                  |         |
| cg13374304 | 7  | 63,016,648  | 0.001434 | -0.219 | -0.173 |  |  |  |                  |         |
| cg10200451 | 8  | 130,353,282 | 0.043995 | -0.219 | -0.210 |  |  |  |                  |         |
| cg17631914 | 4  | 49,514,820  | 5.34E-25 | -0.219 | -0.196 |  |  |  |                  |         |
| cg24655087 | 15 | 26,416,943  | 0.000161 | -0.219 | -0.209 |  |  |  |                  |         |
| cg21542643 | 7  | 99,425,614  | 4.2E-10  | -0.219 | -0.209 |  |  |  | <i>CYP3A43</i>   | TSS200  |
| cg24670445 | 11 | 57,519,282  | 1.04E-10 | -0.219 | -0.208 |  |  |  | <i>BTBD18</i>    | TSS200  |
| cg26347851 | 20 | 61,754,869  | 0.003121 | -0.219 | -0.125 |  |  |  |                  |         |
| cg19518426 | 5  | 2,866,779   | 0.01216  | -0.219 | -0.119 |  |  |  |                  |         |
| cg14668152 | 10 | 131,357,256 | 0.000233 | -0.219 | -0.215 |  |  |  | <i>MGMT</i>      | Body    |
| cg18384588 | 22 | 46,463,747  | 1.35E-08 | -0.219 | -0.194 |  |  |  |                  |         |
| cg19223521 | 2  | 119,436,490 | 0.011222 | -0.219 | -0.225 |  |  |  |                  |         |
| cg23846443 | 6  | 155,777,949 | 0.004414 | -0.219 | -0.178 |  |  |  | <i>NOX3</i>      | TSS1500 |
| cg13588599 | 9  | 131,102,140 | 1.65E-07 | -0.219 | -0.195 |  |  |  | <i>SLC27A4</i>   | TSS1500 |
| cg24375470 | 2  | 68,066,948  | 1.06E-12 | -0.219 | -0.211 |  |  |  |                  |         |
| cg14301118 | 20 | 47,003,643  | 0.041597 | -0.219 | -0.162 |  |  |  |                  |         |
| cg22036057 | 1  | 104,097,670 | 3.52E-05 | -0.219 | -0.198 |  |  |  | <i>AMY2B</i>     | 5'UTR   |
| cg04742334 | 20 | 37,850,248  | 0.004117 | -0.219 | -0.176 |  |  |  | <i>LOC339568</i> | Body    |
| cg22839180 | 5  | 175,117,697 | 0.044842 | -0.219 | -0.126 |  |  |  |                  |         |
| cg22912214 | 8  | 145,675,857 | 7.8E-05  | -0.219 | -0.200 |  |  |  | <i>CYHR1</i>     | Body    |

|            |    |             |          |        |        |  |     |  |                  |         |
|------------|----|-------------|----------|--------|--------|--|-----|--|------------------|---------|
| cg04234597 | 5  | 3,851,581   | 2.29E-11 | -0.219 | -0.227 |  |     |  |                  |         |
| cg00032490 | 12 | 131,402,349 | 0.008919 | -0.219 | -0.066 |  |     |  |                  |         |
| cg01179769 | 13 | 45,742,810  | 1.76E-07 | -0.219 | -0.261 |  |     |  | <i>GTF2F2</i>    | Body    |
| cg18587499 | 14 | 94,121,146  | 3.16E-09 | -0.219 | -0.184 |  |     |  | <i>KIAA1409</i>  | Body    |
| cg11526413 | 15 | 90,223,712  | 1.19E-09 | -0.219 | -0.230 |  |     |  | <i>PLIN1</i>     | TSS1500 |
| cg01169521 | 14 | 19,746,900  | 1.29E-09 | -0.219 | -0.192 |  |     |  |                  |         |
| cg04515258 | 17 | 78,825,412  | 0.038805 | -0.219 | -0.180 |  |     |  | <i>RPTOR</i>     | Body    |
| cg07183970 | 12 | 34,457,254  | 0.036777 | -0.219 | -0.132 |  |     |  |                  |         |
| cg21093807 | 3  | 56,717,625  | 1.81E-05 | -0.219 | -0.240 |  |     |  | <i>C3orf63</i>   | TSS1500 |
| cg02315870 | 7  | 26,236,721  | 0.000118 | -0.219 | -0.192 |  |     |  | <i>HNRNPA2B1</i> | Body    |
| cg02639667 | 5  | 154,092,321 | 1.18E-05 | -0.219 | -0.208 |  |     |  | <i>LARP1</i>     | TSS200  |
| cg11850659 | 6  | 164,254,856 | 0.011104 | -0.219 | -0.181 |  |     |  |                  |         |
| cg22618219 | 6  | 133,036,651 | 0.012288 | -0.219 | -0.181 |  |     |  | <i>VNN1</i>      | TSS1500 |
| cg24580655 | 1  | 159,145,638 | 0.000276 | -0.219 | -0.157 |  |     |  | <i>CADM3</i>     | Body    |
| cg23296792 | 5  | 147,777,756 | 0.001236 | -0.219 | -0.203 |  | Yes |  | <i>FBXO38</i>    | Body    |
| cg07450749 | 14 | 43,123,081  | 2.6E-05  | -0.219 | -0.250 |  |     |  |                  |         |
| cg13016237 | 7  | 154,681,513 | 0.044385 | -0.219 | -0.163 |  |     |  | <i>DPP6</i>      | Body    |
| cg24702147 | 12 | 7,071,814   | 0.000337 | -0.219 | -0.215 |  |     |  | <i>MIR141</i>    | TSS1500 |
| cg23714454 | 11 | 125,756,760 | 0.012658 | -0.219 | -0.275 |  |     |  | <i>HYLS1</i>     | TSS200  |
| cg09668599 | 2  | 44,231,045  | 0.000795 | -0.219 | -0.158 |  |     |  |                  |         |
| cg22022671 | 5  | 83,253,023  | 0.006326 | -0.219 | -0.157 |  |     |  | <i>EDIL3</i>     | Body    |
| cg03448548 | 16 | 33,604,228  | 5.83E-05 | -0.219 | -0.192 |  |     |  |                  |         |
| cg05433222 | 7  | 94,948,020  | 0.000347 | -0.219 | -0.212 |  |     |  | <i>PON1</i>      | Body    |
| cg10711528 | 3  | 189,022,661 | 7.49E-05 | -0.219 | -0.188 |  |     |  | <i>TPRG1</i>     | Body    |
| cg21045575 | 13 | 59,169,584  | 5.86E-05 | -0.219 | -0.203 |  |     |  |                  |         |
| cg10399850 | 1  | 1,089,668   | 6.41E-05 | -0.219 | -0.196 |  |     |  |                  |         |
| cg15998773 | 1  | 15,987,116  | 0.001313 | -0.219 | -0.197 |  |     |  | <i>RSC1A1</i>    | 1stExon |
| cg20995977 | 1  | 4,856,996   | 0.049115 | -0.219 | -0.082 |  |     |  |                  |         |
| cg15307285 | 11 | 22,648,074  | 0.000168 | -0.219 | -0.237 |  |     |  | <i>FANCF</i>     | TSS1500 |
| cg23990303 | 8  | 130,760,646 | 0.033056 | -0.219 | -0.159 |  |     |  | <i>GSDMC</i>     | 3'UTR   |
| cg00585076 | 6  | 168,376,325 | 0.021274 | -0.219 | -0.142 |  |     |  |                  |         |
| cg14004552 | 6  | 32,167,840  | 4.87E-05 | -0.219 | -0.143 |  |     |  | <i>NOTCH4</i>    | Body    |
| cg20353653 | 15 | 85,143,219  | 3.59E-08 | -0.219 | -0.218 |  |     |  | <i>ZSCAN2</i>    | TSS1500 |
| cg20067780 | 17 | 78,008,520  | 1.13E-05 | -0.219 | -0.184 |  |     |  | <i>TBC1D16</i>   | 5'UTR   |

|            |    |             |          |        |        |  |  |     |  |          |         |
|------------|----|-------------|----------|--------|--------|--|--|-----|--|----------|---------|
| cg02586198 | 16 | 29,820,119  | 7.36E-27 | -0.219 | -0.209 |  |  |     |  | MAZ      | Body    |
| cg26012050 | 20 | 17,292,250  | 0.03552  | -0.219 | -0.146 |  |  |     |  | PCSK2    | Body    |
| cg02683929 | 13 | 39,566,053  | 0.004712 | -0.219 | -0.185 |  |  |     |  | STOML3   | TSS1500 |
| cg10529845 | 16 | 49,522,337  | 0.028461 | -0.219 | -0.160 |  |  |     |  |          |         |
| cg01394884 | 4  | 186,961,192 | 1.02E-12 | -0.219 | -0.209 |  |  |     |  |          |         |
| cg04092699 | 2  | 76,975,220  | 0.000621 | -0.219 | -0.194 |  |  |     |  | LRRTM4   | 3'UTR   |
| cg06587955 | Y  | 9,368,165   | 0.000278 | -0.219 | -0.175 |  |  |     |  | TSPY4    | 3'UTR   |
| cg12210543 | 19 | 12,175,107  | 2.31E-11 | -0.219 | -0.208 |  |  |     |  | ZNF844   | TSS1500 |
| cg02326301 | 1  | 228,650,406 | 2.86E-06 | -0.219 | -0.227 |  |  |     |  |          |         |
| cg01519063 | 8  | 102,505,293 | 2.27E-08 | -0.219 | -0.219 |  |  |     |  | GRHL2    | Body    |
| cg14266927 | 14 | 75,987,682  | 0.000428 | -0.219 | -0.229 |  |  |     |  | BATF     | TSS1500 |
| cg18805469 | 1  | 152,944,810 | 0.032558 | -0.219 | -0.158 |  |  |     |  | SPRR4    | 3'UTR   |
| cg22867156 | 6  | 28,555,664  | 8.83E-22 | -0.219 | -0.206 |  |  |     |  | SCAND3   | TSS1500 |
| cg14728856 | X  | 47,052,534  | 5.91E-10 | -0.219 | -0.199 |  |  |     |  | UBA1     | 5'UTR   |
| cg24082174 | 3  | 186,503,643 | 4.07E-09 | -0.219 | -0.225 |  |  |     |  | SNORA63  | TSS1500 |
| cg15143024 | 7  | 91,199,642  | 5.07E-07 | -0.219 | -0.199 |  |  |     |  |          |         |
| cg01879083 | 5  | 10,306,031  | 0.000844 | -0.219 | -0.291 |  |  |     |  | CMBL     | 5'UTR   |
| cg26906737 | 1  | 212,541,551 | 1.44E-06 | -0.219 | -0.177 |  |  |     |  | TMEM206  | Body    |
| cg02901136 | 1  | 153,348,305 | 0.043923 | -0.219 | -0.141 |  |  |     |  | S100A12  | TSS1500 |
| cg19397885 | 7  | 12,444,115  | 1.38E-06 | -0.219 | -0.223 |  |  |     |  | VWDE     | TSS1500 |
| cg24052731 | 12 | 34,529,645  | 0.005605 | -0.219 | -0.160 |  |  |     |  |          |         |
| cg10961758 | 5  | 83,222,828  | 1.48E-06 | -0.219 | -0.220 |  |  |     |  |          |         |
| cg25533594 | 11 | 101,450,197 | 0.001187 | -0.219 | -0.224 |  |  |     |  | TRPC6    | Body    |
| cg02077256 | 17 | 15,133,981  | 3.07E-05 | -0.220 | -0.229 |  |  |     |  | PMP22    | 3'UTR   |
| cg05680111 | 6  | 32,047,122  | 0.013371 | -0.220 | -0.127 |  |  |     |  | TNXB     | Body    |
| cg07511317 | 14 | 104,159,997 | 0.001265 | -0.220 | -0.229 |  |  |     |  | KLC1     | Body    |
| cg10094886 | 1  | 204,301,278 | 0.021292 | -0.220 | -0.139 |  |  |     |  | PLEKHA6  | 5'UTR   |
| cg18440774 | 4  | 69,212,380  | 0.000299 | -0.220 | -0.170 |  |  |     |  | YTHDC1   | Body    |
| cg22378678 | 3  | 167,185,752 | 1.57E-05 | -0.220 | -0.205 |  |  | Yes |  | SERPINI2 | Body    |
| cg17002719 | 7  | 12,444,013  | 0.025311 | -0.220 | -0.198 |  |  | Yes |  | VWDE     | TSS200  |
| cg08096702 | 15 | 31,358,323  | 0.007581 | -0.220 | -0.221 |  |  |     |  | MIR211   | TSS1500 |
| cg15556873 | 2  | 78,263,008  | 0.009136 | -0.220 | -0.208 |  |  |     |  |          |         |
| cg10462897 | 16 | 86,457,593  | 0.038735 | -0.220 | -0.129 |  |  |     |  |          |         |
| cg14014964 | 9  | 94,443,692  | 0.034137 | -0.220 | -0.125 |  |  |     |  |          |         |

|            |    |             |          |        |        |  |  |  |                 |         |
|------------|----|-------------|----------|--------|--------|--|--|--|-----------------|---------|
| cg19755714 | 4  | 140,842,902 | 1.3E-05  | -0.220 | -0.218 |  |  |  | <i>MAML3</i>    | Body    |
| cg00697290 | 3  | 22,410,416  | 1.26E-06 | -0.220 | -0.223 |  |  |  |                 |         |
| cg00069003 | 5  | 140,164,106 | 0.000293 | -0.220 | -0.243 |  |  |  |                 |         |
| cg14248084 | Y  | 14,076,009  | 0.019966 | -0.220 | -0.154 |  |  |  |                 |         |
| cg16818361 | 3  | 118,792,317 | 0.030789 | -0.220 | -0.150 |  |  |  | <i>IGSF11</i>   | Body    |
| cg01282269 | 21 | 41,515,306  | 7.21E-05 | -0.220 | -0.169 |  |  |  | <i>DSCAM</i>    | Body    |
| cg17540450 | 13 | 35,167,000  | 0.003493 | -0.220 | -0.168 |  |  |  |                 |         |
| cg12677267 | 8  | 36,602,729  | 0.003518 | -0.220 | -0.130 |  |  |  |                 |         |
| cg06765219 | 8  | 644,572     | 8.21E-07 | -0.220 | -0.207 |  |  |  | <i>ERICH1</i>   | Body    |
| cg03207987 | 11 | 56,000,287  | 0.016259 | -0.220 | -0.101 |  |  |  | <i>OR5T2</i>    | 1stExon |
| cg20972294 | 11 | 133,005,919 | 0.048421 | -0.220 | -0.143 |  |  |  | <i>OPCML</i>    | Body    |
| cg08805386 | 8  | 37,797,731  | 0.00252  | -0.220 | -0.152 |  |  |  | <i>GOT1L1</i>   | TSS200  |
| cg11684549 | 17 | 79,122,243  | 0.033091 | -0.220 | -0.099 |  |  |  | <i>AATK</i>     | Body    |
| cg15654892 | 8  | 60,834,013  | 0.00129  | -0.220 | -0.177 |  |  |  |                 |         |
| cg24903668 | 5  | 142,941,044 | 9.22E-06 | -0.220 | -0.207 |  |  |  |                 |         |
| cg07572927 | 14 | 21,155,679  | 1.22E-05 | -0.220 | -0.214 |  |  |  | <i>RNASE4</i>   | TSS1500 |
| cg19737334 | 8  | 46,951,755  | 0.009044 | -0.220 | -0.145 |  |  |  |                 |         |
| cg08120226 | 3  | 195,531,633 | 1.44E-08 | -0.220 | -0.221 |  |  |  | <i>MUC4</i>     | Body    |
| cg09697696 | 5  | 139,488,623 | 0.006429 | -0.220 | -0.145 |  |  |  |                 |         |
| cg19878326 | 6  | 30,078,632  | 0.010396 | -0.220 | -0.202 |  |  |  | <i>TRIM31</i>   | Body    |
| cg26175846 | 6  | 32,972,492  | 0.003746 | -0.220 | -0.124 |  |  |  | <i>HLA-DOA</i>  | 3'UTR   |
| cg00214856 | 11 | 2,242,500   | 0.036846 | -0.220 | -0.191 |  |  |  |                 |         |
| cg09905047 | 16 | 33,570,115  | 0.001365 | -0.220 | -0.147 |  |  |  |                 |         |
| cg24850334 | 1  | 218,879,437 | 1.02E-10 | -0.220 | -0.237 |  |  |  |                 |         |
| cg14646039 | 5  | 152,729,842 | 0.000126 | -0.220 | -0.199 |  |  |  |                 |         |
| cg15202552 | 1  | 157,671,759 | 8.41E-08 | -0.220 | -0.230 |  |  |  | <i>FCRL3</i>    | TSS1500 |
| cg23083074 | 4  | 89,202,819  | 3.32E-06 | -0.220 | -0.214 |  |  |  | <i>PPM1K</i>    | 5'UTR   |
| cg08371224 | 5  | 170,066,539 | 0.002848 | -0.220 | -0.154 |  |  |  | <i>KCNIP1</i>   | Body    |
| cg26150300 | 6  | 134,141,433 | 1.82E-08 | -0.220 | -0.221 |  |  |  | <i>MGC34034</i> | TSS1500 |
| cg08097973 | 11 | 71,793,051  | 3.16E-05 | -0.220 | -0.193 |  |  |  | <i>LRTOMT</i>   | 5'UTR   |
| cg25636441 | 11 | 88,059,527  | 0.007786 | -0.220 | -0.266 |  |  |  | <i>CTSC</i>     | 3'UTR   |
| cg18513357 | 5  | 135,696,688 | 0.008673 | -0.220 | -0.215 |  |  |  | <i>TRPC7</i>    | Body    |
| cg24072224 | 19 | 43,410,455  | 3.42E-07 | -0.220 | -0.207 |  |  |  | <i>PSG6</i>     | Body    |
| cg13541257 | 9  | 44,873,530  | 0.001905 | -0.220 | -0.222 |  |  |  |                 |         |

|            |    |             |          |        |        |          |        |  |                |         |
|------------|----|-------------|----------|--------|--------|----------|--------|--|----------------|---------|
| cg15870576 | 5  | 178,545,115 | 0.001652 | -0.220 | -0.232 |          |        |  | <i>ADAMTS2</i> | Body    |
| cg01927373 | 4  | 82,407,884  | 0.000135 | -0.220 | -0.206 |          |        |  |                |         |
| cg04186249 | 22 | 37,006,716  | 0.009883 | -0.220 | -0.128 |          |        |  | <i>CACNG2</i>  | Body    |
| cg09354518 | 16 | 61,951,081  | 0.01822  | -0.220 | -0.146 |          |        |  | <i>CDH8</i>    | Body    |
| cg13181695 | 2  | 31,749,899  | 2.08E-06 | -0.220 | -0.211 |          |        |  | <i>SRD5A2</i>  | 3'UTR   |
| cg23260578 | 14 | 20,978,830  | 0.021235 | -0.220 | -0.190 |          |        |  | <i>RNASE10</i> | 1stExon |
| cg14201634 | 11 | 111,831,876 | 0.001328 | -0.220 | -0.176 |          |        |  | <i>DIXDC1</i>  | Body    |
| cg10137253 | 14 | 101,507,590 | 0.000596 | -0.220 | -0.248 |          |        |  | <i>MIR300</i>  | TSS200  |
| cg16777493 | 16 | 84,483,628  | 3.85E-06 | -0.220 | -0.208 |          |        |  | <i>ATP2C2</i>  | Body    |
| cg09756014 | 16 | 89,152,366  | 0.042403 | -0.220 | -0.088 |          |        |  |                |         |
| cg11619879 | 5  | 121,022,314 | 0.001554 | -0.220 | -0.138 |          |        |  |                |         |
| cg16405876 | 5  | 78,317,871  | 3.98E-07 | -0.220 | -0.194 |          |        |  | <i>DMGDH</i>   | Body    |
| cg21997672 | 7  | 123,221,351 | 2.86E-10 | -0.220 | -0.202 |          |        |  |                |         |
| cg02512902 | 17 | 25,799,447  | 4.32E-05 | -0.220 | -0.203 |          |        |  | <i>KSR1</i>    | 5'UTR   |
| cg01828798 | Y  | 8,571,457   | 0.026667 | -0.220 | -0.145 |          |        |  | <i>TTY19</i>   | TSS1500 |
| cg15896356 | 18 | 72,168,601  | 0.000925 | -0.220 | -0.162 |          |        |  | <i>CNDP2</i>   | Body    |
| cg23504924 | 5  | 13,945,371  | 2.14E-06 | -0.220 | -0.221 |          |        |  | <i>DNAH5</i>   | TSS1500 |
| cg18940763 | 22 | 29,197,846  | 4.3E-07  | -0.220 | -0.235 | 3.88E-10 | -0.175 |  | <i>XBP1</i>    | TSS1500 |
| cg21631443 | 15 | 100,049,225 | 0.003185 | -0.220 | -0.139 |          |        |  |                |         |
| cg23493497 | 11 | 131,992,673 | 0.01521  | -0.220 | -0.154 |          |        |  | <i>NTM</i>     | Body    |
| cg20084079 | 11 | 55,135,656  | 0.005801 | -0.220 | -0.166 |          |        |  | <i>OR4A15</i>  | 1stExon |
| cg00012148 | 6  | 54,172,997  | 0.049738 | -0.220 | -0.063 |          |        |  | <i>TINAG</i>   | TSS1500 |
| cg07151236 | 20 | 59,543,878  | 0.006943 | -0.220 | -0.147 |          |        |  |                |         |
| cg23003315 | 6  | 30,070,109  | 1.95E-06 | -0.220 | -0.217 |          |        |  |                |         |
| cg25840824 | 20 | 56,269,575  | 3.41E-07 | -0.220 | -0.242 |          |        |  | <i>PMEPA1</i>  | 5'UTR   |
| cg03180819 | 2  | 166,061,599 | 0.001019 | -0.220 | -0.172 |          |        |  | <i>SCN3A</i>   | TSS1500 |
| cg03271150 | 19 | 46,387,760  | 0.00169  | -0.220 | -0.184 |          |        |  | <i>IRF2BP1</i> | 1stExon |
| cg06878009 | 16 | 77,874,011  | 1.92E-07 | -0.220 | -0.224 |          |        |  | <i>VAT1L</i>   | Body    |
| cg07624310 | 15 | 26,235,362  | 0.012469 | -0.220 | -0.123 |          |        |  |                |         |
| cg15690511 | 11 | 50,004,210  | 1.89E-08 | -0.220 | -0.227 |          |        |  | <i>OR4C12</i>  | TSS200  |
| cg06411879 | 10 | 21,456,039  | 1.4E-08  | -0.220 | -0.220 |          |        |  | <i>NEBL</i>    | Body    |
| cg18617860 | 20 | 10,202,522  | 1.98E-07 | -0.220 | -0.190 |          |        |  | <i>SNAP25</i>  | 5'UTR   |
| cg03072740 | 12 | 56,030,437  | 0.041859 | -0.220 | -0.126 |          |        |  | <i>OR10P1</i>  | TSS1500 |
| cg05696931 | 1  | 227,175,867 | 1.83E-06 | -0.220 | -0.226 |          |        |  |                |         |

|            |    |             |          |        |        |          |        |  |                  |         |
|------------|----|-------------|----------|--------|--------|----------|--------|--|------------------|---------|
| cg13959062 | 8  | 2,363,737   | 0.001865 | -0.220 | -0.180 |          |        |  |                  |         |
| cg22222261 | 11 | 22,219,092  | 0.006329 | -0.220 | -0.288 |          |        |  | <i>ANO5</i>      | Body    |
| cg25032793 | 18 | 76,125,627  | 0.047409 | -0.220 | -0.122 |          |        |  |                  |         |
| cg09418000 | 7  | 39,056,400  | 1.62E-05 | -0.220 | -0.231 |          |        |  | <i>POU6F2</i>    | Body    |
| cg13556767 | 9  | 8,234,760   | 0.000339 | -0.220 | -0.199 |          |        |  |                  |         |
| cg04165933 | 16 | 49,833,847  | 0.010847 | -0.220 | -0.119 |          |        |  | <i>ZNF423</i>    | Body    |
| cg14200127 | 1  | 97,604,182  | 1.56E-08 | -0.220 | -0.234 |          |        |  | <i>DPYD</i>      | Body    |
| cg16237565 | 15 | 101,922,942 | 2.55E-07 | -0.220 | -0.201 |          |        |  | <i>PCSK6</i>     | Body    |
| cg02384419 | 7  | 104,568,180 | 0.000224 | -0.220 | -0.231 |          |        |  | <i>LOC723809</i> | TSS1500 |
| cg23855121 | 4  | 38,784,938  | 0.000293 | -0.220 | -0.174 |          |        |  | <i>TLR10</i>     | TSS1500 |
| cg10821841 | 13 | 112,200,892 | 0.046069 | -0.220 | -0.065 |          |        |  |                  |         |
| cg11073813 | 6  | 109,029,018 | 0.000195 | -0.220 | -0.238 |          |        |  |                  |         |
| cg20564865 | 6  | 31,096,861  | 2.44E-05 | -0.220 | -0.227 |          |        |  | <i>PSORS1C1</i>  | 5'UTR   |
| cg19214658 | 13 | 112,892,641 | 0.022619 | -0.221 | -0.133 |          |        |  |                  |         |
| cg01276031 | 14 | 88,737,828  | 0.009989 | -0.221 | -0.155 |          |        |  | <i>KCNK10</i>    | TSS1500 |
| cg10996368 | 11 | 131,940,246 | 0.001645 | -0.221 | -0.201 |          |        |  | <i>NTM</i>       | Body    |
| cg12811617 | 14 | 105,446,698 | 2.24E-14 | -0.221 | -0.190 |          |        |  |                  |         |
| cg11182199 | 6  | 150,161,689 | 4.15E-06 | -0.221 | -0.198 |          |        |  | <i>LRP11</i>     | Body    |
| cg06954520 | 18 | 68,095,624  | 2.23E-05 | -0.221 | -0.202 |          |        |  |                  |         |
| cg13721907 | 14 | 48,148,429  | 2.12E-07 | -0.221 | -0.208 |          |        |  |                  |         |
| cg20318217 | 2  | 147,172,982 | 0.01406  | -0.221 | -0.192 |          |        |  |                  |         |
| cg07646665 | 4  | 12,052,569  | 0.007965 | -0.221 | -0.260 |          |        |  |                  |         |
| cg03274669 | 13 | 74,805,233  | 5.76E-05 | -0.221 | -0.189 |          |        |  |                  |         |
| cg12990035 | 3  | 98,690,540  | 0.015481 | -0.221 | -0.243 |          |        |  |                  |         |
| cg14840487 | 1  | 220,962,870 | 0.009166 | -0.221 | -0.097 |          |        |  | <i>MOSC1</i>     | Body    |
| cg27292264 | 3  | 128,079,636 | 2.51E-06 | -0.221 | -0.268 |          |        |  | <i>MIR1280</i>   | TSS1500 |
| cg02094827 | 10 | 99,496,515  | 8.11E-09 | -0.221 | -0.197 |          |        |  | <i>ZFYVE27</i>   | TSS1500 |
| cg04107005 | 13 | 113,029,350 | 0.03299  | -0.221 | -0.131 |          |        |  | <i>C13orf28</i>  | TSS1500 |
| cg08981648 | 2  | 233,750,457 | 2.02E-05 | -0.221 | -0.210 |          |        |  | <i>NGEF</i>      | Body    |
| cg18181492 | 1  | 2,340,084   | 0.001811 | -0.221 | -0.259 |          |        |  | <i>PEX10</i>     | Body    |
| cg11819637 | 3  | 184,095,505 | 0.008901 | -0.221 | -0.197 | 2.31E-11 | -0.185 |  | <i>THPO</i>      | 5'UTR   |
| cg20481640 | 1  | 100,928,376 | 1.68E-09 | -0.221 | -0.219 |          |        |  | <i>CDC14A</i>    | Body    |
| cg20503535 | 14 | 91,755,616  | 1.85E-05 | -0.221 | -0.220 |          |        |  | <i>CCDC88C</i>   | Body    |
| cg24756966 | 6  | 43,478,692  | 0.005495 | -0.221 | -0.179 |          |        |  | <i>C6orf154</i>  | TSS1500 |

|            |    |             |          |        |        |  |  |  |                |         |
|------------|----|-------------|----------|--------|--------|--|--|--|----------------|---------|
| cg26548729 | 2  | 127,401,321 | 0.004952 | -0.221 | -0.162 |  |  |  |                |         |
| cg20325454 | 2  | 74,078,577  | 6.5E-10  | -0.221 | -0.228 |  |  |  | <i>STAMBP</i>  | Body    |
| cg01272393 | 2  | 103,239,393 | 0.000201 | -0.221 | -0.153 |  |  |  | <i>SLC9A2</i>  | Body    |
| cg01727408 | 16 | 85,609,071  | 0.000313 | -0.221 | -0.213 |  |  |  |                |         |
| cg13097800 | 14 | 47,104,140  | 0.010611 | -0.221 | -0.264 |  |  |  |                |         |
| cg01554539 | 7  | 157,413,902 | 0.013527 | -0.221 | -0.215 |  |  |  | <i>PTPRN2</i>  | Body    |
| cg15082394 | 6  | 33,264,525  | 0.000891 | -0.221 | -0.178 |  |  |  | <i>RGL2</i>    | Body    |
| cg10131232 | 20 | 1,610,358   | 0.007647 | -0.221 | -0.131 |  |  |  | <i>SIRPG</i>   | 3'UTR   |
| cg22542632 | 4  | 59,362,677  | 0.034925 | -0.221 | -0.099 |  |  |  |                |         |
| cg01478628 | 11 | 20,614,302  | 0.000204 | -0.221 | -0.206 |  |  |  |                |         |
| cg21181391 | 8  | 88,886,411  | 0.035256 | -0.221 | -0.111 |  |  |  | <i>DCAF4L2</i> | TSS200  |
| cg22860195 | 2  | 364,258     | 6.66E-06 | -0.221 | -0.155 |  |  |  |                |         |
| cg00148513 | 1  | 241,584,653 | 0.042599 | -0.221 | -0.105 |  |  |  |                |         |
| cg13934236 | 22 | 43,507,609  | 1.05E-08 | -0.221 | -0.217 |  |  |  | <i>BIK</i>     | 5'UTR   |
| cg02490589 | 1  | 158,944,784 | 0.019229 | -0.221 | -0.177 |  |  |  | <i>PYHIN1</i>  | Body    |
| cg08464505 | 13 | 113,425,982 | 3.13E-05 | -0.221 | -0.202 |  |  |  | <i>ATP11A</i>  | Body    |
| cg08658634 | 1  | 184,319,916 | 1.74E-05 | -0.221 | -0.191 |  |  |  |                |         |
| cg23567627 | 14 | 104,093,551 | 1.76E-05 | -0.221 | -0.218 |  |  |  |                |         |
| cg02304751 | 4  | 99,583,945  | 6.1E-06  | -0.221 | -0.230 |  |  |  |                |         |
| cg08891123 | 15 | 59,576,097  | 3.56E-06 | -0.221 | -0.219 |  |  |  | <i>MYO1E</i>   | Body    |
| cg00397764 | 10 | 115,939,717 | 1.03E-10 | -0.221 | -0.214 |  |  |  | <i>TDRD1</i>   | 5'UTR   |
| cg23050227 | 8  | 112,241,152 | 0.017461 | -0.221 | -0.221 |  |  |  |                |         |
| cg19521693 | 19 | 54,468,577  | 9.38E-08 | -0.221 | -0.186 |  |  |  | <i>CACNG8</i>  | Body    |
| cg23132327 | 11 | 80,167,599  | 1.01E-07 | -0.221 | -0.214 |  |  |  |                |         |
| cg01787460 | 5  | 4,868,532   | 2.84E-07 | -0.221 | -0.200 |  |  |  |                |         |
| cg27021368 | 6  | 155,639,080 | 0.006033 | -0.221 | -0.195 |  |  |  |                |         |
| cg00927226 | 7  | 115,608,801 | 0.00411  | -0.221 | -0.248 |  |  |  | <i>TFEC</i>    | Body    |
| cg01661235 | 16 | 23,988,974  | 0.036596 | -0.221 | -0.163 |  |  |  | <i>PRKCB</i>   | Body    |
| cg26124968 | 7  | 44,801,571  | 0.000922 | -0.221 | -0.183 |  |  |  | <i>ZMIZ2</i>   | Body    |
| cg15776919 | 4  | 181,463,296 | 0.000153 | -0.221 | -0.190 |  |  |  |                |         |
| cg11394361 | 17 | 67,570,862  | 0.041909 | -0.221 | -0.129 |  |  |  |                |         |
| cg03784113 | 13 | 112,602,492 | 0.007764 | -0.221 | -0.144 |  |  |  |                |         |
| cg05017309 | 6  | 154,361,687 | 0.014552 | -0.221 | -0.109 |  |  |  | <i>OPRM1</i>   | Body    |
| cg18068140 | 6  | 18,123,164  | 9.03E-06 | -0.221 | -0.228 |  |  |  | <i>NHLRC1</i>  | TSS1500 |

|            |    |             |          |        |        |          |        |  |                 |         |
|------------|----|-------------|----------|--------|--------|----------|--------|--|-----------------|---------|
| cg07568233 | 16 | 7,382,520   | 0.009016 | -0.221 | -0.125 |          |        |  | <i>A2BP1</i>    | Body    |
| cg09493966 | 16 | 51,165,636  | 0.030054 | -0.221 | -0.173 |          |        |  |                 |         |
| cg10489672 | 1  | 117,296,494 | 0.000977 | -0.221 | -0.229 |          |        |  | <i>CD2</i>      | TSS1500 |
| cg19282411 | 6  | 48,842,056  | 0.004365 | -0.221 | -0.223 |          |        |  |                 |         |
| cg05919105 | 1  | 77,533,592  | 5.33E-07 | -0.221 | -0.217 |          |        |  |                 |         |
| cg02681040 | 11 | 3,240,201   | 0.000967 | -0.221 | -0.143 |          |        |  | <i>MRGPRG</i>   | TSS200  |
| cg24681654 | 7  | 31,555,516  | 6.77E-11 | -0.221 | -0.232 |          |        |  | <i>CCDC129</i>  | TSS1500 |
| cg25042465 | 8  | 50,825,702  | 0.006298 | -0.221 | -0.156 |          |        |  | <i>SNTG1</i>    | 5'UTR   |
| cg03329572 | 1  | 157,523,253 | 0.016204 | -0.221 | -0.166 |          |        |  | <i>FCRL5</i>    | TSS1500 |
| cg19770955 | 7  | 107,203,448 | 0.000307 | -0.221 | -0.180 | 2.19E-17 | -0.135 |  | <i>COG5</i>     | Body    |
| cg07760622 | 10 | 117,754,806 | 0.029421 | -0.221 | -0.214 |          |        |  |                 |         |
| cg09546889 | 2  | 22,918,193  | 0.011463 | -0.221 | -0.131 |          |        |  |                 |         |
| cg13150785 | 15 | 41,138,160  | 0.000138 | -0.221 | -0.224 |          |        |  | <i>SPINT1</i>   | Body    |
| cg23457518 | 10 | 134,810,240 | 0.001845 | -0.221 | -0.129 |          |        |  |                 |         |
| cg25551622 | 17 | 65,052,432  | 0.000159 | -0.221 | -0.226 |          |        |  | <i>CACNG1</i>   | 3'UTR   |
| cg13235825 | 11 | 107,574,836 | 0.001875 | -0.221 | -0.198 |          |        |  |                 |         |
| cg23140050 | 14 | 97,673,803  | 0.037145 | -0.221 | -0.153 |          |        |  |                 |         |
| cg12196692 | 5  | 41,071,405  | 0.045565 | -0.221 | -0.170 |          |        |  | <i>HEATR7B2</i> | 1stExon |
| cg18537027 | 5  | 64,601,816  | 0.000575 | -0.221 | -0.190 |          |        |  | <i>ADAMTS6</i>  | Body    |
| cg24418182 | 7  | 97,841,447  | 0.035835 | -0.221 | -0.086 |          |        |  | <i>BHLHA15</i>  | TSS200  |
| cg01515534 | 19 | 42,415,665  | 0.001457 | -0.221 | -0.154 |          |        |  |                 |         |
| cg03787088 | 11 | 34,847,603  | 2.81E-05 | -0.221 | -0.190 |          |        |  |                 |         |
| cg23367089 | 2  | 220,169,805 | 0.027935 | -0.221 | -0.180 |          |        |  | <i>PTPRN</i>    | Body    |
| cg01651570 | 14 | 104,194,141 | 0.007774 | -0.221 | -0.210 |          |        |  | <i>ZFYVE21</i>  | Body    |
| cg14043752 | 2  | 64,770,117  | 1.37E-05 | -0.221 | -0.224 |          |        |  | <i>AFTPH</i>    | 5'UTR   |
| cg08934318 | 1  | 44,583,886  | 5.19E-08 | -0.221 | -0.200 |          |        |  | <i>KLF17</i>    | TSS1500 |
| cg17004733 | 1  | 55,682,652  | 6.38E-07 | -0.221 | -0.211 |          |        |  |                 |         |
| cg02456804 | 1  | 166,039,858 | 0.004427 | -0.221 | -0.256 |          |        |  | <i>FAM78B</i>   | Body    |
| cg11906285 | 5  | 23,315,719  | 0.019984 | -0.221 | -0.184 |          |        |  |                 |         |
| cg01416657 | 1  | 205,392,241 | 1.52E-10 | -0.221 | -0.211 |          |        |  | <i>LEMD1</i>    | TSS1500 |
| cg13392680 | 8  | 72,935,034  | 0.000483 | -0.221 | -0.243 |          |        |  | <i>TRPA1</i>    | 3'UTR   |
| cg15230460 | 8  | 11,989,691  | 0.006259 | -0.221 | -0.139 |          |        |  | <i>FAM66D</i>   | Body    |
| cg10700114 | 4  | 189,956,937 | 0.027672 | -0.221 | -0.121 |          |        |  |                 |         |
| cg16456980 | 11 | 70,714,131  | 0.004887 | -0.221 | -0.146 |          |        |  | <i>SHANK2</i>   | Body    |



|            |    |             |          |        |        |  |  |                  |         |
|------------|----|-------------|----------|--------|--------|--|--|------------------|---------|
| cg04242070 | 5  | 1,749,101   | 0.007674 | -0.221 | -0.144 |  |  |                  |         |
| cg23232188 | 3  | 121,556,543 | 0.000307 | -0.221 | -0.149 |  |  | <i>EAF2</i>      | Body    |
| cg00473929 | 19 | 35,417,259  | 1.09E-10 | -0.221 | -0.198 |  |  | <i>ZNF30</i>     | TSS1500 |
| cg01751245 | 2  | 65,593,761  | 2.68E-09 | -0.221 | -0.203 |  |  | <i>SPRED2</i>    | 5'UTR   |
| cg23840044 | 11 | 22,696,087  | 2.69E-08 | -0.221 | -0.210 |  |  | <i>GAS2</i>      | 5'UTR   |
| cg09509365 | 1  | 3,006,755   | 0.038219 | -0.221 | -0.045 |  |  | <i>PRDM16</i>    | Body    |
| cg12512173 | 13 | 111,936,059 | 0.012269 | -0.221 | -0.225 |  |  | <i>ARHGEF7</i>   | Body    |
| cg19086905 | 15 | 102,342,791 | 0.003827 | -0.221 | -0.166 |  |  |                  |         |
| cg13580382 | 9  | 140,081,032 | 1.87E-06 | -0.222 | -0.205 |  |  | <i>ANAPC2</i>    | Body    |
| cg27435799 | X  | 3,030,635   | 0.023511 | -0.222 | -0.178 |  |  | <i>ARSF</i>      | 3'UTR   |
| cg17822978 | 15 | 72,073,485  | 2.83E-06 | -0.222 | -0.230 |  |  | <i>THSD4</i>     | 3'UTR   |
| cg06502755 | 2  | 84,517,950  | 0.04643  | -0.222 | -0.148 |  |  | <i>LOC388965</i> | Body    |
| cg15458801 | 1  | 209,254,540 | 0.029001 | -0.222 | -0.179 |  |  |                  |         |
| cg13531735 | 3  | 42,923,116  | 0.013241 | -0.222 | -0.132 |  |  |                  |         |
| cg03926846 | 4  | 184,678,574 | 0.000504 | -0.222 | -0.234 |  |  |                  |         |
| cg18555746 | 11 | 18,725,854  | 0.005669 | -0.222 | -0.129 |  |  | <i>IGSF22</i>    | 3'UTR   |
| cg26961103 | X  | 139,865,953 | 0.011648 | -0.222 | -0.213 |  |  | <i>CDR1</i>      | 1stExon |
| cg10704680 | 11 | 2,064,747   | 0.000546 | -0.222 | -0.175 |  |  |                  |         |
| cg11708358 | 6  | 150,183,516 | 1.73E-08 | -0.222 | -0.216 |  |  | <i>LRP11</i>     | Body    |
| cg00347938 | 11 | 69,469,113  | 2.25E-05 | -0.222 | -0.218 |  |  | <i>CCND1</i>     | 3'UTR   |
| cg01534527 | 3  | 38,003,247  | 6.89E-11 | -0.222 | -0.213 |  |  | <i>CTDSPL</i>    | Body    |
| cg16240319 | 10 | 127,590,074 | 2.7E-06  | -0.222 | -0.176 |  |  | <i>FANK1</i>     | Body    |
| cg24013105 | 8  | 137,955,493 | 0.030771 | -0.222 | -0.162 |  |  |                  |         |
| cg18870085 | 4  | 187,985,253 | 0.003474 | -0.222 | -0.189 |  |  |                  |         |
| cg19931596 | 2  | 172,645,256 | 1.23E-05 | -0.222 | -0.203 |  |  | <i>SLC25A12</i>  | Body    |
| cg09596722 | 2  | 232,525,772 | 0.032762 | -0.222 | -0.203 |  |  |                  |         |
| cg25968149 | 3  | 174,255,312 | 0.00081  | -0.222 | -0.119 |  |  |                  |         |
| cg06844719 | 16 | 9,326,393   | 0.046351 | -0.222 | -0.176 |  |  |                  |         |
| cg00880562 | 3  | 153,838,126 | 1.21E-07 | -0.222 | -0.223 |  |  | <i>SGEF</i>      | TSS1500 |
| cg02880679 | 17 | 49,295,615  | 7.48E-07 | -0.222 | -0.268 |  |  | <i>MBTD1</i>     | Body    |
| cg02968890 | 2  | 3,281,036   | 0.02678  | -0.222 | -0.275 |  |  | <i>TSSC1</i>     | Body    |
| cg12530994 | 10 | 5,136,782   | 0.001153 | -0.222 | -0.207 |  |  | <i>AKR1C3</i>    | Body    |
| cg02055988 | 22 | 31,671,702  | 0.000331 | -0.222 | -0.216 |  |  | <i>LIMK2</i>     | Body    |
| cg09374462 | 4  | 49,314,051  | 0.029185 | -0.222 | -0.117 |  |  |                  |         |

|            |    |             |          |        |        |            |        |     |  |                  |         |
|------------|----|-------------|----------|--------|--------|------------|--------|-----|--|------------------|---------|
| cg18827501 | 2  | 167,338,333 | 0.006771 | -0.222 | -0.124 |            |        |     |  | <i>SCN7A</i>     | 5'UTR   |
| cg00523067 | 6  | 154,440,289 | 0.002245 | -0.222 | -0.180 |            |        |     |  | <i>OPRM1</i>     | 3'UTR   |
| cg00918005 | 2  | 79,253,210  | 0.00221  | -0.222 | -0.186 | 0.0000313  | -0.107 |     |  | <i>REG3G</i>     | 5'UTR   |
| cg19800856 | 14 | 104,645,554 | 0.011271 | -0.222 | -0.175 |            |        |     |  | <i>KIF26A</i>    | Body    |
| cg19849728 | 4  | 111,536,767 | 0.034613 | -0.222 | -0.118 |            |        |     |  |                  |         |
| cg00095431 | 2  | 67,775,781  | 8.21E-08 | -0.222 | -0.238 |            |        |     |  |                  |         |
| cg10127415 | X  | 26,210,523  | 0.013894 | -0.222 | -0.267 | 2.35E-13   | -0.214 |     |  | <i>MAGEB6</i>    | TSS200  |
| cg18722615 | 11 | 40,359,642  | 0.001634 | -0.222 | -0.181 |            |        |     |  |                  |         |
| cg06599514 | 16 | 86,328,711  | 0.008436 | -0.222 | -0.166 |            |        |     |  |                  |         |
| cg14229404 | 9  | 107,894,426 | 0.000336 | -0.222 | -0.146 |            |        |     |  |                  |         |
| cg15823330 | 1  | 3,207,539   | 0.040139 | -0.222 | -0.048 |            |        |     |  | <i>PRDM16</i>    | Body    |
| cg01170129 | 2  | 110,448,269 | 7.06E-08 | -0.222 | -0.202 |            |        |     |  |                  |         |
| cg12555810 | 12 | 119,187,794 | 0.006973 | -0.222 | -0.149 |            |        |     |  |                  |         |
| cg26393791 | 2  | 16,180,066  | 0.000835 | -0.222 | -0.256 |            |        |     |  |                  |         |
| cg11018432 | 12 | 124,832,427 | 0.018331 | -0.222 | -0.124 |            |        |     |  | <i>NCOR2</i>     | Body    |
| cg21143109 | 15 | 93,851,183  | 0.019886 | -0.222 | -0.104 |            |        |     |  |                  |         |
| cg23895722 | 11 | 128,776,112 | 2.17E-09 | -0.222 | -0.214 |            |        |     |  | <i>C11orf45</i>  | TSS1500 |
| cg24717078 | 11 | 126,744,469 | 0.048612 | -0.222 | -0.234 |            |        |     |  | <i>KIRREL3</i>   | Body    |
| cg26223968 | 14 | 101,204,240 | 0.025153 | -0.222 | -0.174 |            |        | Yes |  |                  |         |
| cg10931853 | 12 | 34,548,115  | 9.55E-06 | -0.222 | -0.215 |            |        |     |  |                  |         |
| cg03880506 | 12 | 132,638,107 | 0.007745 | -0.222 | -0.152 |            |        |     |  |                  |         |
| cg17959416 | 19 | 22,987,826  | 0.005036 | -0.222 | -0.164 |            |        |     |  |                  |         |
| cg23338408 | 14 | 31,289,523  | 0.000909 | -0.222 | -0.154 |            |        |     |  |                  |         |
| cg00920668 | 1  | 207,991,122 | 0.037199 | -0.222 | -0.086 |            |        |     |  | <i>LOC148696</i> | TSS1500 |
| cg09535475 | 2  | 42,444,827  | 0.000637 | -0.222 | -0.252 |            |        |     |  | <i>EML4</i>      | Body    |
| cg01886855 | 21 | 43,786,997  | 1.04E-06 | -0.222 | -0.215 |            |        |     |  | <i>TFF1</i>      | TSS1500 |
| cg03898365 | 11 | 6,897,491   | 0.004629 | -0.222 | -0.252 | 0.00000167 | -0.131 |     |  | <i>OR10A4</i>    | TSS1500 |
| cg04514206 | 20 | 4,576,647   | 3.99E-05 | -0.222 | -0.202 |            |        |     |  |                  |         |
| cg12690127 | 12 | 7,055,683   | 4.25E-29 | -0.222 | -0.222 |            |        |     |  | <i>PTPN6</i>     | TSS200  |
| cg26208159 | 11 | 48,266,856  | 0.002192 | -0.222 | -0.165 |            |        |     |  | <i>OR4X2</i>     | 1stExon |
| cg20849957 | 1  | 2,820,995   | 0.035135 | -0.222 | -0.070 |            |        |     |  |                  |         |
| cg00789143 | 14 | 98,013,058  | 0.02153  | -0.222 | -0.150 |            |        |     |  |                  |         |
| cg02153208 | 15 | 57,589,160  | 9.5E-07  | -0.222 | -0.205 |            |        |     |  |                  |         |
| cg03374976 | 1  | 205,630,722 | 1.33E-08 | -0.222 | -0.177 |            |        |     |  | <i>SLC45A3</i>   | Body    |

|            |    |             |          |        |        |  |  |  |                 |         |
|------------|----|-------------|----------|--------|--------|--|--|--|-----------------|---------|
| cg02966841 | 2  | 1,926,366   | 0.008761 | -0.222 | -0.178 |  |  |  | <i>MYT1L</i>    | Body    |
| cg08408740 | 5  | 52,558,413  | 0.000363 | -0.222 | -0.174 |  |  |  |                 |         |
| cg18715189 | 19 | 57,631,405  | 0.036768 | -0.222 | -0.093 |  |  |  | <i>USP29</i>    | TSS200  |
| cg02179478 | 3  | 35,785,377  | 0.026353 | -0.222 | -0.187 |  |  |  | <i>MIR128-2</i> | TSS1500 |
| cg09144520 | 10 | 134,842,984 | 1.48E-08 | -0.222 | -0.195 |  |  |  |                 |         |
| cg09873772 | 16 | 4,896,197   | 1.36E-16 | -0.222 | -0.219 |  |  |  | <i>GLYR1</i>    | Body    |
| cg18384794 | 5  | 148,509,515 | 1.19E-06 | -0.222 | -0.198 |  |  |  |                 |         |
| cg05544940 | 6  | 33,170,339  | 0.000172 | -0.222 | -0.253 |  |  |  | <i>SLC39A7</i>  | Body    |
| cg10087556 | 7  | 116,232,819 | 1.08E-05 | -0.222 | -0.244 |  |  |  |                 |         |
| cg20299572 | 11 | 1,750,763   | 0.020317 | -0.222 | -0.187 |  |  |  | <i>HCCA2</i>    | Body    |
| cg07056967 | 11 | 68,176,220  | 1.34E-05 | -0.222 | -0.217 |  |  |  | <i>LRP5</i>     | Body    |
| cg19227053 | 20 | 60,116,795  | 0.014542 | -0.222 | -0.130 |  |  |  | <i>CDH4</i>     | Body    |
| cg25326319 | 7  | 1,733,132   | 5.8E-10  | -0.222 | -0.215 |  |  |  |                 |         |
| cg12380772 | 9  | 34,374,990  | 0.0017   | -0.222 | -0.201 |  |  |  | <i>KIAA1161</i> | 5'UTR   |
| cg15855924 | 13 | 111,565,111 | 4.44E-05 | -0.222 | -0.218 |  |  |  | <i>ANKRD10</i>  | Body    |
| cg14244402 | 9  | 130,681,102 | 2.99E-06 | -0.222 | -0.203 |  |  |  |                 |         |
| cg17769229 | 10 | 83,639,690  | 0.003213 | -0.222 | -0.154 |  |  |  | <i>NRG3</i>     | Body    |
| cg09251492 | 1  | 3,701,070   | 0.002855 | -0.222 | -0.127 |  |  |  | <i>LRRC47</i>   | Body    |
| cg17276450 | 1  | 23,044,353  | 0.019977 | -0.222 | -0.259 |  |  |  | <i>EPHB2</i>    | Body    |
| cg22972187 | 4  | 155,512,766 | 0.00041  | -0.222 | -0.160 |  |  |  | <i>FGA</i>      | TSS1500 |
| cg09851241 | 3  | 186,731,798 | 0.024456 | -0.222 | -0.185 |  |  |  | <i>ST6GAL1</i>  | 5'UTR   |
| cg11407198 | 19 | 5,047,591   | 3.84E-07 | -0.222 | -0.197 |  |  |  | <i>KDM4B</i>    | Body    |
| cg16857852 | X  | 115,567,695 | 3.14E-09 | -0.222 | -0.244 |  |  |  | <i>SLC6A14</i>  | TSS200  |
| cg04063339 | 8  | 56,545,297  | 0.028729 | -0.222 | -0.168 |  |  |  |                 |         |
| cg21805791 | 7  | 1,581,258   | 1.01E-05 | -0.222 | -0.147 |  |  |  | <i>MAFK</i>     | 3'UTR   |
| cg24432768 | 1  | 158,149,974 | 0.004819 | -0.222 | -0.276 |  |  |  | <i>CD1D</i>     | 5'UTR   |
| cg02878382 | 14 | 104,665,702 | 1.48E-05 | -0.222 | -0.186 |  |  |  |                 |         |
| cg15078211 | 7  | 42,265,517  | 9.54E-08 | -0.222 | -0.234 |  |  |  | <i>GLI3</i>     | 5'UTR   |
| cg17983632 | 6  | 1,621,930   | 6.03E-05 | -0.222 | -0.186 |  |  |  |                 |         |
| cg02505681 | 19 | 39,615,285  | 1.52E-05 | -0.222 | -0.146 |  |  |  | <i>PAK4</i>     | TSS1500 |
| cg16432350 | 12 | 52,585,695  | 6.63E-06 | -0.222 | -0.191 |  |  |  | <i>KRT80</i>    | 1stExon |
| cg19923622 | 8  | 2,793,577   | 0.020854 | -0.222 | -0.170 |  |  |  | <i>CSMD1</i>    | 3'UTR   |
| cg05937687 | 8  | 70,101,609  | 1.95E-05 | -0.222 | -0.259 |  |  |  |                 |         |
| cg12079266 | 18 | 55,924,005  | 0.015651 | -0.222 | -0.156 |  |  |  | <i>NEDD4L</i>   | 5'UTR   |

|            |    |             |          |        |        |            |        |     |                |         |
|------------|----|-------------|----------|--------|--------|------------|--------|-----|----------------|---------|
| cg15018704 | 19 | 1,908,132   | 2.98E-06 | -0.222 | -0.234 |            |        |     | <i>ADAT3</i>   | 5'UTR   |
| cg09186101 | 17 | 80,197,062  | 4.15E-07 | -0.222 | -0.238 |            |        |     | <i>SLC16A3</i> | 3'UTR   |
| cg24365121 | 11 | 1,860,114   | 0.012077 | -0.222 | -0.143 |            |        |     | <i>TNNI2</i>   | TSS1500 |
| cg23242649 | 20 | 34,196,465  | 0.000606 | -0.222 | -0.188 |            |        |     | <i>FER1L4</i>  | TSS1500 |
| cg25370836 | 6  | 32,175,001  | 0.001085 | -0.222 | -0.124 |            |        |     | <i>NOTCH4</i>  | Body    |
| cg21094613 | 11 | 78,900,687  | 8.28E-05 | -0.222 | -0.223 |            |        |     | <i>ODZ4</i>    | 5'UTR   |
| cg12078857 | 13 | 79,845,094  | 0.000241 | -0.222 | -0.249 |            |        |     |                |         |
| cg08898349 | 10 | 116,697,070 | 0.003697 | -0.222 | -0.181 |            |        |     | <i>TRUB1</i>   | TSS1500 |
| cg12339328 | 20 | 18,491,484  | 0.004209 | -0.223 | -0.104 |            |        |     | <i>SEC23B</i>  | Body    |
| cg07737566 | 7  | 50,847,263  | 0.010679 | -0.223 | -0.250 |            |        |     | <i>GRB10</i>   | 5'UTR   |
| cg14780990 | 15 | 93,181,182  | 2.1E-06  | -0.223 | -0.196 |            |        |     | <i>FAM174B</i> | Body    |
| cg16746369 | 16 | 51,192,174  | 0.011552 | -0.223 | -0.162 |            |        |     |                |         |
| cg05627696 | 4  | 16,933,239  | 0.001886 | -0.223 | -0.172 |            |        |     |                |         |
| cg07668671 | 12 | 113,305,756 | 1.07E-06 | -0.223 | -0.216 |            |        |     | <i>RPH3A</i>   | Body    |
| cg11168687 | 4  | 185,726,782 | 0.000109 | -0.223 | -0.205 |            |        |     | <i>ACSL1</i>   | 5'UTR   |
| cg00237825 | 20 | 29,844,575  | 0.006781 | -0.223 | -0.186 |            |        |     | <i>DEFB115</i> | TSS1500 |
| cg05713044 | 5  | 16,671,496  | 0.000246 | -0.223 | -0.228 |            |        |     | <i>MYO10</i>   | Body    |
| cg06747288 | 1  | 31,247,617  | 0.000481 | -0.223 | -0.136 |            |        |     |                |         |
| cg12929160 | 13 | 77,030,645  | 0.041212 | -0.223 | -0.209 |            |        |     |                |         |
| cg20789620 | 19 | 4,304,334   | 2.08E-07 | -0.223 | -0.234 | 6.14E-21   | -0.151 |     | <i>FSD1</i>    | TSS1500 |
| cg24897291 | 6  | 136,910,199 | 1.89E-05 | -0.223 | -0.189 |            |        |     | <i>MAP3K5</i>  | Body    |
| cg03132551 | 7  | 55,411,178  | 0.000329 | -0.223 | -0.165 |            |        |     |                |         |
| cg12426196 | 1  | 161,008,826 | 2.37E-28 | -0.223 | -0.231 |            |        |     | <i>TSTD1</i>   | TSS200  |
| cg21505231 | 6  | 30,984,668  | 8.32E-10 | -0.223 | -0.166 |            |        |     |                |         |
| cg07622201 | 7  | 49,929,836  | 0.019096 | -0.223 | -0.186 |            |        |     | <i>VWC2</i>    | Body    |
| cg08650961 | 10 | 104,748,594 | 5.07E-06 | -0.223 | -0.199 |            |        |     | <i>CNNM2</i>   | Body    |
| cg10909192 | 14 | 45,579,847  | 0.000137 | -0.223 | -0.224 |            |        |     | <i>PRPF39</i>  | Body    |
| cg17079788 | 7  | 57,878,893  | 0.004605 | -0.223 | -0.191 |            |        |     |                |         |
| cg25093503 | 5  | 174,163,341 | 0.000832 | -0.223 | -0.157 |            |        |     |                |         |
| cg05538118 | 16 | 32,493,059  | 0.000848 | -0.223 | -0.231 |            |        | Yes |                |         |
| cg20983531 | 7  | 21,986,672  | 6.44E-08 | -0.223 | -0.233 |            |        |     | <i>CDCA7L</i>  | TSS1500 |
| cg10694598 | 7  | 95,957,175  | 1.28E-08 | -0.223 | -0.210 |            |        |     |                |         |
| cg18414381 | 11 | 34,642,885  | 6.86E-09 | -0.223 | -0.213 | 0.00886177 | -0.056 |     | <i>EHF</i>     | 5'UTR   |
| cg00300969 | 20 | 31,366,486  | 0.000228 | -0.223 | -0.161 |            |        |     | <i>DNMT3B</i>  | 5'UTR   |

|            |    |             |          |        |        |  |  |  |                  |         |
|------------|----|-------------|----------|--------|--------|--|--|--|------------------|---------|
| cg06029905 | 11 | 2,155,521   | 0.005594 | -0.223 | -0.123 |  |  |  | <i>INS-IGF2</i>  | Body    |
| cg17275991 | 19 | 58,003,312  | 0.00401  | -0.223 | -0.093 |  |  |  | <i>ZNF419</i>    | Body    |
| cg23260554 | 1  | 2,934,497   | 0.005756 | -0.223 | -0.099 |  |  |  |                  |         |
| cg07371757 | 20 | 45,437,086  | 0.003569 | -0.223 | -0.161 |  |  |  |                  |         |
| cg22971594 | 14 | 23,442,770  | 5.87E-06 | -0.223 | -0.163 |  |  |  | <i>JUB</i>       | Body    |
| cg04498801 | 4  | 2,932,447   | 5.97E-07 | -0.223 | -0.232 |  |  |  | <i>MFSD10</i>    | 3'UTR   |
| cg02489219 | 2  | 197,676,272 | 1.11E-08 | -0.223 | -0.204 |  |  |  | <i>C2orf66</i>   | TSS1500 |
| cg09492832 | 17 | 32,966,466  | 0.003605 | -0.223 | -0.130 |  |  |  |                  |         |
| cg20250343 | 2  | 92,160,107  | 0.000846 | -0.223 | -0.181 |  |  |  |                  |         |
| cg15076179 | 2  | 113,804,820 | 2.11E-10 | -0.223 | -0.217 |  |  |  | <i>IL1F8</i>     | 5'UTR   |
| cg15732053 | X  | 47,662,641  | 3.45E-11 | -0.223 | -0.219 |  |  |  |                  |         |
| cg08675521 | 11 | 18,716,666  | 7.16E-07 | -0.223 | -0.200 |  |  |  |                  |         |
| cg21536086 | 1  | 154,166,546 | 0.000131 | -0.223 | -0.160 |  |  |  | <i>MIR190B</i>   | TSS1500 |
| cg09136052 | 7  | 95,546,508  | 4.28E-05 | -0.223 | -0.270 |  |  |  | <i>DYNC1I1</i>   | Body    |
| cg02449975 | 1  | 165,571,280 | 0.000123 | -0.223 | -0.256 |  |  |  |                  |         |
| cg06362052 | 12 | 37,940,985  | 0.000208 | -0.223 | -0.216 |  |  |  |                  |         |
| cg15781873 | 6  | 156,077,514 | 0.000991 | -0.223 | -0.175 |  |  |  |                  |         |
| cg23117999 | 14 | 96,508,302  | 0.002305 | -0.223 | -0.141 |  |  |  | <i>C14orf132</i> | Body    |
| cg09163412 | 10 | 133,644,714 | 0.022205 | -0.223 | -0.090 |  |  |  |                  |         |
| cg19949697 | 4  | 133,902,873 | 0.017771 | -0.223 | -0.181 |  |  |  |                  |         |
| cg26080545 | 10 | 15,174,924  | 0.000397 | -0.223 | -0.234 |  |  |  | <i>NMT2</i>      | Body    |
| cg01024458 | 1  | 8,703,816   | 1.17E-07 | -0.223 | -0.217 |  |  |  | <i>RERE</i>      | Body    |
| cg01338296 | 7  | 129,556,606 | 7.06E-05 | -0.223 | -0.206 |  |  |  | <i>UBE2H</i>     | Body    |
| cg02141358 | 8  | 57,228,615  | 0.004741 | -0.223 | -0.185 |  |  |  | <i>SDR16C5</i>   | Body    |
| cg19121056 | 3  | 62,864,393  | 1.26E-06 | -0.223 | -0.179 |  |  |  |                  |         |
| cg21312929 | 8  | 72,111,329  | 0.007577 | -0.223 | -0.202 |  |  |  | <i>EYA1</i>      | 3'UTR   |
| cg00492070 | 3  | 107,810,716 | 5.69E-06 | -0.223 | -0.236 |  |  |  | <i>CD47</i>      | TSS1500 |
| cg01466011 | 3  | 156,837,590 | 4.07E-06 | -0.223 | -0.231 |  |  |  |                  |         |
| cg22702857 | 12 | 4,269,985   | 0.022802 | -0.223 | -0.126 |  |  |  |                  |         |
| cg09438085 | X  | 52,087,706  | 0.006306 | -0.223 | -0.212 |  |  |  |                  |         |
| cg27383651 | 6  | 28,888,809  | 1.34E-05 | -0.223 | -0.172 |  |  |  | <i>TRIM27</i>    | Body    |
| cg01240823 | 15 | 92,667,819  | 0.029901 | -0.223 | -0.137 |  |  |  | <i>SLCO3A1</i>   | Body    |
| cg01432087 | 11 | 67,242,162  | 1.15E-08 | -0.223 | -0.210 |  |  |  |                  |         |
| cg04596544 | 5  | 33,997,325  | 0.002891 | -0.223 | -0.151 |  |  |  | <i>AMACR</i>     | Body    |

|            |    |             |          |        |        |  |  |  |                 |         |
|------------|----|-------------|----------|--------|--------|--|--|--|-----------------|---------|
| cg16134254 | 13 | 39,181,323  | 0.036827 | -0.223 | -0.170 |  |  |  |                 |         |
| cg00320453 | 11 | 123,756,564 | 0.023582 | -0.223 | -0.126 |  |  |  | <i>TMEM225</i>  | TSS1500 |
| cg24530116 | 10 | 81,904,331  | 1.03E-13 | -0.223 | -0.181 |  |  |  | <i>PLAC9</i>    | Body    |
| cg01800148 | 1  | 9,130,886   | 2.56E-05 | -0.223 | -0.214 |  |  |  | <i>SLC2A5</i>   | TSS1500 |
| cg21899558 | 7  | 661,634     | 5.97E-05 | -0.223 | -0.186 |  |  |  | <i>PRKAR1B</i>  | Body    |
| cg15446520 | 4  | 120,930,379 | 0.011637 | -0.223 | -0.173 |  |  |  |                 |         |
| cg20469680 | 7  | 135,458,419 | 9.54E-06 | -0.223 | -0.216 |  |  |  |                 |         |
| cg21664614 | 13 | 111,277,611 | 0.023343 | -0.223 | -0.139 |  |  |  | <i>CARKD</i>    | Body    |
| cg26343358 | 6  | 31,275,666  | 0.032177 | -0.223 | -0.246 |  |  |  |                 |         |
| cg14321918 | 3  | 168,526,492 | 0.019575 | -0.223 | -0.113 |  |  |  | <i>C3orf50</i>  | Body    |
| cg26622634 | 10 | 117,886,935 | 8.25E-05 | -0.223 | -0.208 |  |  |  | <i>GFRA1</i>    | Body    |
| cg16636682 | 16 | 33,781,365  | 0.003471 | -0.223 | -0.196 |  |  |  |                 |         |
| cg05155809 | 7  | 62,562,718  | 0.004198 | -0.223 | -0.182 |  |  |  |                 |         |
| cg11387248 | 19 | 43,269,877  | 0.028676 | -0.223 | -0.268 |  |  |  | <i>PSG8</i>     | TSS200  |
| cg16284238 | 6  | 87,196,595  | 0.000819 | -0.223 | -0.282 |  |  |  |                 |         |
| cg04239863 | 16 | 87,093,670  | 0.039505 | -0.223 | -0.125 |  |  |  |                 |         |
| cg01067983 | 6  | 2,961,157   | 2.5E-07  | -0.223 | -0.188 |  |  |  | <i>SERPINB6</i> | 5'UTR   |
| cg03607573 | 11 | 93,471,889  | 4.78E-09 | -0.223 | -0.192 |  |  |  | <i>TAF1D</i>    | Body    |
| cg18674460 | 6  | 32,169,650  | 0.000264 | -0.223 | -0.141 |  |  |  | <i>NOTCH4</i>   | Body    |
| cg00526273 | 20 | 59,864,749  | 0.011886 | -0.223 | -0.115 |  |  |  | <i>CDH4</i>     | Body    |
| cg04428071 | 17 | 80,225,377  | 0.03259  | -0.223 | -0.044 |  |  |  | <i>CSNK1D</i>   | Body    |
| cg26427827 | 1  | 10,713,944  | 0.004765 | -0.223 | -0.149 |  |  |  | <i>CASZ1</i>    | Body    |
| cg15195541 | 8  | 4,188,646   | 0.026831 | -0.223 | -0.132 |  |  |  | <i>CSMD1</i>    | Body    |
| cg07959747 | 10 | 82,050,672  | 9.41E-08 | -0.223 | -0.208 |  |  |  | <i>MAT1A</i>    | TSS1500 |
| cg08293623 | 11 | 40,803,410  | 0.000375 | -0.223 | -0.216 |  |  |  |                 |         |
| cg12710637 | 1  | 2,918,373   | 0.026532 | -0.223 | -0.096 |  |  |  |                 |         |
| cg27039467 | 16 | 1,730,561   | 0.049567 | -0.223 | -0.250 |  |  |  | <i>HN1L</i>     | Body    |
| cg13665853 | 9  | 34,689,585  | 4.32E-05 | -0.223 | -0.208 |  |  |  | <i>CCL19</i>    | 3'UTR   |
| cg07151443 | 6  | 32,920,962  | 8.11E-06 | -0.223 | -0.216 |  |  |  | <i>HLA-DMA</i>  | TSS200  |
| cg15557758 | 1  | 13,828,828  | 0.001474 | -0.223 | -0.088 |  |  |  |                 |         |
| cg20793897 | 2  | 200,025,325 | 0.037083 | -0.223 | -0.165 |  |  |  |                 |         |
| cg09418673 | 11 | 76,372,128  | 0.000159 | -0.223 | -0.214 |  |  |  | <i>LRR32</i>    | Body    |
| cg10581876 | 1  | 205,645,246 | 0.003305 | -0.223 | -0.161 |  |  |  | <i>SLC45A3</i>  | 5'UTR   |
| cg26034799 | 9  | 5,185,804   | 2.81E-05 | -0.223 | -0.181 |  |  |  | <i>INSL6</i>    | TSS200  |

|            |    |             |          |        |        |  |  |  |                  |         |
|------------|----|-------------|----------|--------|--------|--|--|--|------------------|---------|
| cg05453893 | 13 | 56,169,684  | 0.035618 | -0.223 | -0.149 |  |  |  |                  |         |
| cg25195987 | 7  | 31,125,925  | 0.042031 | -0.223 | -0.118 |  |  |  | <i>ADCYAP1R1</i> | Body    |
| cg08697797 | 2  | 234,668,834 | 1.01E-07 | -0.223 | -0.183 |  |  |  | <i>UGT1A10</i>   | Body    |
| cg23075771 | 1  | 64,188,741  | 0.003823 | -0.223 | -0.141 |  |  |  |                  |         |
| cg05265703 | 3  | 137,787,902 | 1.58E-07 | -0.223 | -0.205 |  |  |  | <i>DZIP1L</i>    | Body    |
| cg18414021 | 14 | 100,069,535 | 2.3E-05  | -0.223 | -0.147 |  |  |  | <i>CCDC85C</i>   | 1stExon |
| cg18080370 | 3  | 62,305,486  | 3.63E-05 | -0.224 | -0.223 |  |  |  | <i>C3orf14</i>   | 1stExon |
| cg22882121 | 6  | 31,842,909  | 2.49E-08 | -0.224 | -0.240 |  |  |  | <i>SLC44A4</i>   | Body    |
| cg19011552 | X  | 146,364,725 | 9.01E-08 | -0.224 | -0.214 |  |  |  | <i>MIR514-2</i>  | TSS1500 |
| cg00180447 | 3  | 126,260,260 | 2.99E-06 | -0.224 | -0.253 |  |  |  | <i>CHST13</i>    | Body    |
| cg02745398 | 4  | 9,445,158   | 0.004765 | -0.224 | -0.179 |  |  |  | <i>DEFB131</i>   | TSS1500 |
| cg00326902 | 6  | 117,747,649 | 0.00015  | -0.224 | -0.223 |  |  |  | <i>ROS1</i>      | TSS1500 |
| cg22522402 | X  | 152,402,356 | 0.003452 | -0.224 | -0.178 |  |  |  |                  |         |
| cg03868978 | 21 | 42,537,294  | 1.47E-10 | -0.224 | -0.212 |  |  |  |                  |         |
| cg16799191 | 3  | 112,395,154 | 0.002405 | -0.224 | -0.212 |  |  |  |                  |         |
| cg24563501 | 11 | 67,442,408  | 3.06E-09 | -0.224 | -0.222 |  |  |  | <i>ALDH3B2</i>   | TSS1500 |
| cg00583861 | 1  | 32,014,363  | 0.010347 | -0.224 | -0.152 |  |  |  |                  |         |
| cg22665383 | 11 | 55,339,961  | 0.025438 | -0.224 | -0.216 |  |  |  | <i>OR4C16</i>    | 1stExon |
| cg24882334 | 12 | 24,902,649  | 0.010786 | -0.224 | -0.261 |  |  |  |                  |         |
| cg16587725 | 11 | 41,139,791  | 0.021908 | -0.224 | -0.217 |  |  |  |                  |         |
| cg17570276 | 7  | 6,099,250   | 0.042918 | -0.224 | -0.344 |  |  |  | <i>EIF2AK1</i>   | TSS1500 |
| cg16166230 | 17 | 32,480,663  | 1.93E-08 | -0.224 | -0.208 |  |  |  | <i>ACCN1</i>     | Body    |
| cg05505103 | 11 | 109,785,847 | 0.007107 | -0.224 | -0.183 |  |  |  |                  |         |
| cg03035538 | 1  | 75,139,958  | 0.046494 | -0.224 | -0.117 |  |  |  | <i>C1orf173</i>  | TSS1500 |
| cg12473257 | 20 | 56,239,669  | 1.03E-05 | -0.224 | -0.244 |  |  |  | <i>PMEPA1</i>    | 5'UTR   |
| cg13560914 | 1  | 9,565,530   | 6.9E-07  | -0.224 | -0.215 |  |  |  |                  |         |
| cg16225663 | 6  | 32,026,797  | 0.013957 | -0.224 | -0.166 |  |  |  | <i>TNXB</i>      | Body    |
| cg13371910 | 6  | 69,990,372  | 0.033465 | -0.224 | -0.245 |  |  |  | <i>BAI3</i>      | Body    |
| cg15527308 | 18 | 54,813,067  | 0.000772 | -0.224 | -0.167 |  |  |  |                  |         |
| cg16587174 | 6  | 31,778,842  | 0.004884 | -0.224 | -0.161 |  |  |  | <i>HSPA1L</i>    | Body    |
| cg07045803 | 4  | 160,125,667 | 3.43E-08 | -0.224 | -0.204 |  |  |  |                  |         |
| cg22712883 | 13 | 31,579,374  | 0.038546 | -0.224 | -0.065 |  |  |  |                  |         |
| cg13094583 | 17 | 21,831,674  | 0.018951 | -0.224 | -0.132 |  |  |  |                  |         |
| cg19415202 | 11 | 133,706,356 | 0.005008 | -0.224 | -0.128 |  |  |  |                  |         |

|            |    |             |          |        |        |            |        |  |                 |         |
|------------|----|-------------|----------|--------|--------|------------|--------|--|-----------------|---------|
| cg16727072 | 4  | 8,646,957   | 0.007753 | -0.224 | -0.093 |            |        |  |                 |         |
| cg26601187 | X  | 110,653,460 | 0.006897 | -0.224 | -0.170 |            |        |  | <i>DCX</i>      | Body    |
| cg27561786 | 1  | 8,525,010   | 5.38E-07 | -0.224 | -0.208 |            |        |  | <i>RERE</i>     | Body    |
| cg24373608 | 3  | 103,645,997 | 0.007413 | -0.224 | -0.177 |            |        |  |                 |         |
| cg10408178 | 14 | 72,219,272  | 0.029222 | -0.224 | -0.097 |            |        |  |                 |         |
| cg16802159 | 16 | 86,457,719  | 0.000403 | -0.224 | -0.177 |            |        |  |                 |         |
| cg04948906 | 11 | 124,413,229 | 0.001454 | -0.224 | -0.235 |            |        |  | <i>OR8B12</i>   | 1stExon |
| cg15128334 | 3  | 185,215,532 | 2.01E-11 | -0.224 | -0.204 |            |        |  | <i>TMEM41A</i>  | Body    |
| cg21359747 | 15 | 101,420,636 | 4.69E-08 | -0.224 | -0.231 | 0.00153659 | -0.081 |  | <i>ALDH1A3</i>  | Body    |
| cg18512262 | 11 | 6,049,729   | 0.017863 | -0.224 | -0.235 |            |        |  | <i>OR56A1</i>   | TSS1500 |
| cg12011596 | 19 | 22,442,461  | 0.001341 | -0.224 | -0.173 |            |        |  |                 |         |
| cg05085729 | 3  | 109,213,358 | 1.76E-06 | -0.224 | -0.255 |            |        |  | <i>FLJ25363</i> | 3'UTR   |
| cg13805793 | 10 | 54,515,952  | 0.012831 | -0.224 | -0.233 |            |        |  |                 |         |
| cg22578425 | 7  | 115,456,904 | 0.019797 | -0.224 | -0.249 |            |        |  |                 |         |
| cg13197551 | 20 | 60,709,957  | 7.34E-06 | -0.224 | -0.222 |            |        |  | <i>LSM14B</i>   | 3'UTR   |
| cg15496763 | 6  | 32,711,102  | 0.030378 | -0.224 | -0.098 |            |        |  | <i>HLA-DQA2</i> | Body    |
| cg20989454 | 11 | 613,478     | 3.68E-08 | -0.224 | -0.240 |            |        |  | <i>IRF7</i>     | Body    |
| cg24069653 | 5  | 169,408,301 | 1.09E-07 | -0.224 | -0.198 |            |        |  | <i>FAM196B</i>  | TSS1500 |
| cg10095968 | 21 | 45,847,903  | 0.000492 | -0.224 | -0.146 |            |        |  | <i>TRPM2</i>    | Body    |
| cg10910685 | 4  | 46,911,519  | 0.038824 | -0.224 | -0.103 |            |        |  | <i>COX7B2</i>   | TSS1500 |
| cg17057663 | 5  | 4,863,806   | 0.039355 | -0.224 | -0.107 |            |        |  |                 |         |
| cg21871338 | 14 | 87,262,857  | 0.005193 | -0.224 | -0.183 |            |        |  |                 |         |
| cg12603671 | 1  | 71,418,388  | 0.000408 | -0.224 | -0.154 |            |        |  | <i>PTGER3</i>   | Body    |
| cg24181605 | 15 | 62,458,847  | 5.46E-05 | -0.224 | -0.220 |            |        |  | <i>C2CD4B</i>   | TSS1500 |
| cg26666538 | 2  | 115,021,229 | 0.015579 | -0.224 | -0.272 |            |        |  |                 |         |
| cg03579446 | 8  | 126,216,633 | 4.03E-09 | -0.224 | -0.223 |            |        |  | <i>NSMCE2</i>   | Body    |
| cg14022090 | 11 | 34,642,303  | 1.47E-05 | -0.224 | -0.220 |            |        |  | <i>EHF</i>      | TSS1500 |
| cg16372051 | 6  | 31,794,302  | 8.36E-17 | -0.224 | -0.225 |            |        |  | <i>HSPA1B</i>   | TSS1500 |
| cg26639085 | 19 | 54,972,720  | 2.1E-06  | -0.224 | -0.190 |            |        |  | <i>LENG8</i>    | 3'UTR   |
| cg22630918 | 10 | 102,748,988 | 0.045657 | -0.224 | -0.154 |            |        |  | <i>C10orf2</i>  | 1stExon |
| cg20611039 | 2  | 168,121,101 | 0.000382 | -0.224 | -0.191 |            |        |  |                 |         |
| cg22186380 | 6  | 132,940,093 | 0.026456 | -0.224 | -0.131 |            |        |  | <i>TAAR2</i>    | Body    |
| cg00968640 | 1  | 185,834,094 | 0.000862 | -0.224 | -0.156 |            |        |  | <i>HMCN1</i>    | Body    |
| cg20141817 | 1  | 153,124,825 | 0.024692 | -0.224 | -0.174 |            |        |  | <i>SPRR2G</i>   | TSS1500 |



|            |    |             |          |        |        |  |  |  |                 |         |
|------------|----|-------------|----------|--------|--------|--|--|--|-----------------|---------|
| cg02980055 | 8  | 47,866,183  | 0.000595 | -0.224 | -0.192 |  |  |  |                 |         |
| cg07283011 | 3  | 133,970,158 | 5.41E-10 | -0.224 | -0.235 |  |  |  | <i>RYK</i>      | TSS1500 |
| cg08321867 | 13 | 112,857,019 | 0.02201  | -0.224 | -0.067 |  |  |  |                 |         |
| cg14386668 | 17 | 3,337,334   | 0.003552 | -0.224 | -0.122 |  |  |  | <i>OR1E2</i>    | TSS200  |
| cg26450574 | 6  | 32,944,067  | 1.16E-13 | -0.224 | -0.230 |  |  |  | <i>BRD2</i>     | Body    |
| cg01534808 | 11 | 128,578,726 | 0.001036 | -0.224 | -0.122 |  |  |  | <i>FLI1</i>     | Body    |
| cg08081485 | 2  | 242,617,771 | 1.38E-06 | -0.224 | -0.229 |  |  |  | <i>DTYMK</i>    | Body    |
| cg12843489 | 17 | 35,061,545  | 1.91E-06 | -0.224 | -0.178 |  |  |  |                 |         |
| cg15948795 | 4  | 7,968,678   | 0.006643 | -0.224 | -0.240 |  |  |  | <i>ABLIM2</i>   | 3'UTR   |
| cg13472610 | 21 | 40,174,791  | 4.79E-05 | -0.224 | -0.194 |  |  |  |                 |         |
| cg17797815 | 10 | 119,806,972 | 9.62E-07 | -0.224 | -0.261 |  |  |  | <i>CASC2</i>    | Body    |
| cg21861953 | 13 | 29,158,391  | 0.048355 | -0.224 | -0.123 |  |  |  |                 |         |
| cg24802813 | 7  | 38,389,991  | 9.21E-05 | -0.224 | -0.146 |  |  |  |                 |         |
| cg05406749 | 11 | 123,495,671 | 0.010382 | -0.225 | -0.208 |  |  |  |                 |         |
| cg05431947 | 11 | 12,621,248  | 0.005932 | -0.225 | -0.118 |  |  |  |                 |         |
| cg12583394 | 5  | 101,827,323 | 0.030224 | -0.225 | -0.083 |  |  |  | <i>SLCO6A1</i>  | Body    |
| cg16113347 | 14 | 93,899,367  | 4.76E-05 | -0.225 | -0.197 |  |  |  | <i>KIAA1409</i> | 5'UTR   |
| cg25621991 | 5  | 142,942,670 | 1.05E-08 | -0.225 | -0.167 |  |  |  |                 |         |
| cg25123362 | 10 | 133,793,734 | 3.96E-05 | -0.225 | -0.209 |  |  |  | <i>BNIP3</i>    | Body    |
| cg05384663 | 1  | 157,671,386 | 0.007358 | -0.225 | -0.191 |  |  |  | <i>FCRL3</i>    | TSS1500 |
| cg18066206 | 22 | 46,459,890  | 2.96E-06 | -0.225 | -0.225 |  |  |  |                 |         |
| cg00061185 | 12 | 50,596,347  | 0.000181 | -0.225 | -0.229 |  |  |  | <i>LIMA1</i>    | Body    |
| cg10186254 | 14 | 80,267,501  | 3.11E-06 | -0.225 | -0.173 |  |  |  | <i>NRXN3</i>    | Body    |
| cg00146928 | 12 | 9,269,671   | 0.024613 | -0.225 | -0.099 |  |  |  | <i>A2M</i>      | TSS1500 |
| cg12810264 | 10 | 43,329,092  | 0.010316 | -0.225 | -0.200 |  |  |  | <i>BMS1</i>     | 3'UTR   |
| cg16986661 | 2  | 65,866,869  | 3.55E-12 | -0.225 | -0.224 |  |  |  |                 |         |
| cg20260619 | 14 | 54,449,398  | 0.021339 | -0.225 | -0.357 |  |  |  |                 |         |
| cg27259633 | 16 | 19,534,852  | 0.007339 | -0.225 | -0.169 |  |  |  | <i>GDE1</i>     | TSS1500 |
| cg14771419 | 7  | 142,012,988 | 0.035397 | -0.225 | -0.290 |  |  |  |                 |         |
| cg04627863 | 2  | 234,741,670 | 0.011675 | -0.225 | -0.239 |  |  |  |                 |         |
| cg19616783 | 10 | 1,063,172   | 3.55E-05 | -0.225 | -0.242 |  |  |  | <i>GTPBP4</i>   | 3'UTR   |
| cg05667197 | 7  | 142,828,903 | 0.000853 | -0.225 | -0.162 |  |  |  | <i>PIP</i>      | TSS1500 |
| cg09643350 | 6  | 66,498,032  | 0.031804 | -0.225 | -0.196 |  |  |  | <i>MCART3P</i>  | Body    |
| cg19389370 | 11 | 10,161,484  | 0.013176 | -0.225 | -0.126 |  |  |  | <i>SBF2</i>     | Body    |

|            |    |             |          |        |        |            |        |     |                     |         |
|------------|----|-------------|----------|--------|--------|------------|--------|-----|---------------------|---------|
| cg14321066 | 3  | 168,115,836 | 0.003481 | -0.225 | -0.130 |            |        |     | <i>C3orf50</i>      | Body    |
| cg26283480 | 3  | 129,252,584 | 3.21E-05 | -0.225 | -0.170 |            |        |     | <i>RHO</i>          | 3'UTR   |
| cg14654811 | 1  | 158,550,705 | 0.034897 | -0.225 | -0.118 |            |        |     | <i>OR10X1</i>       | TSS1500 |
| cg09277566 | 22 | 50,017,428  | 0.007976 | -0.225 | -0.137 |            |        |     | <i>C22orf34</i>     | Body    |
| cg24467326 | 10 | 9,646,929   | 0.018028 | -0.225 | -0.193 |            |        |     |                     |         |
| cg03160217 | 2  | 117,814,299 | 0.016594 | -0.225 | -0.177 |            |        |     |                     |         |
| cg06219695 | 16 | 434,256     | 3.64E-08 | -0.225 | -0.205 |            |        |     | <i>LOC100134368</i> | Body    |
| cg15825510 | 7  | 97,882,260  | 0.000112 | -0.225 | -0.187 |            |        |     | <i>TECPR1</i>       | TSS1500 |
| cg23360101 | 8  | 858,591     | 0.000101 | -0.225 | -0.189 |            |        |     |                     |         |
| cg24924502 | 17 | 79,109,777  | 0.029554 | -0.225 | -0.106 |            |        |     | <i>AATK</i>         | Body    |
| cg13847226 | 4  | 7,193,237   | 0.001917 | -0.225 | -0.159 |            |        |     | <i>SORCS2</i>       | TSS1500 |
| cg16714933 | 12 | 34,529,386  | 1.27E-07 | -0.225 | -0.242 |            |        |     |                     |         |
| cg08484337 | 6  | 31,590,563  | 1.27E-06 | -0.225 | -0.219 |            |        |     | <i>SNORA38</i>      | TSS1500 |
| cg16955318 | 11 | 124,056,323 | 0.01878  | -0.225 | -0.171 |            |        |     |                     |         |
| cg20998200 | 11 | 22,370,099  | 1.01E-05 | -0.225 | -0.231 |            |        | Yes | <i>SLC17A6</i>      | Body    |
| cg05078644 | 13 | 101,910,857 | 0.025584 | -0.225 | -0.148 |            |        |     | <i>NALCN</i>        | Body    |
| cg15642035 | 8  | 139,165,052 | 0.01026  | -0.225 | -0.181 | 0.00135878 | -0.107 |     | <i>FAM135B</i>      | Body    |
| cg18186343 | 14 | 101,317,620 | 0.001625 | -0.225 | -0.190 |            |        |     | <i>MIR770</i>       | TSS1500 |
| cg14286514 | 9  | 32,525,315  | 3.44E-05 | -0.225 | -0.165 |            |        |     | <i>DDX58</i>        | Body    |
| cg26277556 | 14 | 54,507,223  | 0.014357 | -0.225 | -0.312 |            |        | Yes |                     |         |
| cg01960885 | 18 | 24,765,781  | 5.55E-07 | -0.225 | -0.190 |            |        |     | <i>CHST9</i>        | TSS1500 |
| cg00861010 | 1  | 41,966,113  | 4.75E-05 | -0.225 | -0.224 |            |        |     |                     |         |
| cg01889461 | 7  | 34,606,530  | 0.008663 | -0.225 | -0.158 |            |        |     |                     |         |
| cg16916688 | 6  | 34,101,441  | 0.001434 | -0.225 | -0.160 |            |        |     | <i>GRM4</i>         | 1stExon |
| cg22366943 | 6  | 124,882,293 | 0.005946 | -0.225 | -0.178 |            |        |     | <i>NKAIN2</i>       | Body    |
| cg08014182 | 6  | 33,241,594  | 1.27E-09 | -0.225 | -0.188 |            |        |     | <i>RPS18</i>        | Body    |
| cg15910070 | 11 | 101,681,939 | 0.020679 | -0.225 | -0.222 |            |        |     |                     |         |
| cg21173150 | 12 | 53,321,588  | 0.000266 | -0.225 | -0.143 |            |        |     |                     |         |
| cg26540441 | 2  | 236,120,905 | 0.000423 | -0.225 | -0.184 |            |        |     |                     |         |
| cg02981942 | 16 | 54,574,605  | 3.5E-07  | -0.225 | -0.190 |            |        |     |                     |         |
| cg04366343 | 4  | 16,819,676  | 0.002654 | -0.225 | -0.149 |            |        |     | <i>LDB2</i>         | Body    |
| cg10567744 | 10 | 130,829,670 | 6.29E-07 | -0.225 | -0.193 |            |        |     |                     |         |
| cg11440666 | 11 | 75,115,402  | 0.000523 | -0.225 | -0.243 |            |        |     | <i>RPS3</i>         | Body    |
| cg26703245 | 11 | 131,460,647 | 0.032574 | -0.225 | -0.141 |            |        |     | <i>NTM</i>          | Body    |

|            |    |             |          |        |        |          |        |  |          |         |
|------------|----|-------------|----------|--------|--------|----------|--------|--|----------|---------|
| cg03400410 | 1  | 198,745,486 | 0.00142  | -0.225 | -0.126 |          |        |  |          |         |
| cg16223358 | 10 | 86,372,858  | 1.58E-08 | -0.225 | -0.218 |          |        |  |          |         |
| cg17331569 | 1  | 160,788,135 | 0.002134 | -0.225 | -0.270 |          |        |  | LY9      | Body    |
| cg10467926 | 7  | 57,090,465  | 0.015451 | -0.225 | -0.176 |          |        |  |          |         |
| cg10808936 | 1  | 159,173,216 | 0.013966 | -0.225 | -0.151 |          |        |  | DARC     | TSS1500 |
| cg00038857 | 17 | 32,645,753  | 0.000231 | -0.225 | -0.213 |          |        |  | CCL8     | TSS1500 |
| cg15756839 | 6  | 57,972,349  | 0.049416 | -0.225 | -0.115 |          |        |  |          |         |
| cg11172483 | 11 | 78,900,896  | 0.00022  | -0.225 | -0.225 |          |        |  | ODZ4     | 5'UTR   |
| cg11232156 | 1  | 158,035,207 | 0.003398 | -0.225 | -0.161 |          |        |  | KIRREL   | Body    |
| cg13399773 | 20 | 34,700,112  | 6.16E-06 | -0.225 | -0.232 |          |        |  | EPB41L1  | TSS1500 |
| cg17184255 | 1  | 12,304,762  | 1.95E-05 | -0.225 | -0.216 |          |        |  | VPS13D   | Body    |
| cg22724854 | 11 | 55,737,072  | 0.005532 | -0.225 | -0.214 |          |        |  | OR10AG1  | TSS1500 |
| cg05431942 | 11 | 6,866,629   | 0.012983 | -0.225 | -0.226 |          |        |  | OR10A5   | TSS1500 |
| cg06361127 | 1  | 182,024,689 | 0.000365 | -0.225 | -0.214 |          |        |  | ZNF648   | 3'UTR   |
| cg11842367 | 1  | 78,703,580  | 3.69E-07 | -0.225 | -0.191 |          |        |  | MGC27382 | Body    |
| cg14401837 | 7  | 34,697,493  | 0.036862 | -0.225 | -0.191 | 3.48E-10 | -0.174 |  | NPSR1    | TSS1500 |
| cg06994787 | 16 | 11,834,960  | 1.28E-06 | -0.225 | -0.281 |          |        |  | TXNDC11  | Body    |
| cg09933323 | 1  | 214,832,208 | 0.00568  | -0.225 | -0.251 |          |        |  | CENPF    | Body    |
| cg21715189 | 2  | 38,304,802  | 0.000319 | -0.225 | -0.240 |          |        |  | CYP1B1   | TSS1500 |
| cg09799307 | 17 | 80,046,218  | 0.009542 | -0.225 | -0.124 |          |        |  | FASN     | Body    |
| cg15139163 | 3  | 11,408,424  | 3.83E-07 | -0.225 | -0.193 |          |        |  | ATG7     | Body    |
| cg11620557 | X  | 39,963,545  | 0.004658 | -0.225 | -0.284 |          |        |  | BCOR     | 5'UTR   |
| cg00616000 | 7  | 6,521,599   | 1.77E-09 | -0.225 | -0.221 |          |        |  | KDELR2   | Body    |
| cg20146904 | 1  | 192,216,653 | 0.006682 | -0.225 | -0.140 |          |        |  |          |         |
| cg06772202 | 7  | 75,678,527  | 2.72E-08 | -0.225 | -0.226 |          |        |  | MDH2     | Body    |
| cg26746309 | 10 | 101,943,528 | 2.65E-07 | -0.225 | -0.184 |          |        |  | ERLIN1   | Body    |
| cg01039849 | 5  | 110,816,428 | 4.69E-06 | -0.225 | -0.208 |          |        |  | CAMK4    | Body    |
| cg02464901 | 2  | 188,851,274 | 7.99E-06 | -0.225 | -0.216 |          |        |  |          |         |
| cg18482892 | 3  | 56,833,426  | 1.45E-17 | -0.225 | -0.217 |          |        |  | ARHGEF3  | Body    |
| cg03975156 | 11 | 7,961,516   | 0.002066 | -0.225 | -0.178 |          |        |  | OR10A3   | TSS1500 |
| cg09385306 | 1  | 85,724,328  | 2.23E-06 | -0.225 | -0.147 |          |        |  | C1orf52  | Body    |
| cg00190034 | 8  | 38,584,636  | 0.009911 | -0.225 | -0.147 |          |        |  | TACC1    | TSS1500 |
| cg01094891 | 19 | 31,048,117  | 0.005141 | -0.225 | -0.165 |          |        |  | ZNF536   | 3'UTR   |
| cg14024893 | 9  | 139,943,146 | 0.011895 | -0.225 | -0.124 |          |        |  | ENTPD2   | Body    |

|            |    |             |          |        |        |            |        |  |                 |         |
|------------|----|-------------|----------|--------|--------|------------|--------|--|-----------------|---------|
| cg02073887 | 15 | 96,531,851  | 2.5E-07  | -0.225 | -0.233 |            |        |  |                 |         |
| cg12663426 | 1  | 155,115,785 | 0.028012 | -0.225 | -0.188 |            |        |  |                 |         |
| cg16384355 | 7  | 157,320,516 | 0.031206 | -0.225 | -0.075 |            |        |  |                 |         |
| cg16401608 | 2  | 220,523,857 | 0.030072 | -0.225 | -0.207 |            |        |  |                 |         |
| cg09424271 | X  | 147,586,050 | 0.003993 | -0.225 | -0.203 |            |        |  | <i>AFF2</i>     | Body    |
| cg14343414 | 6  | 31,025,967  | 0.010204 | -0.225 | -0.143 |            |        |  | <i>HCG22</i>    | Body    |
| cg05670717 | 21 | 46,368,052  | 5.62E-06 | -0.225 | -0.193 |            |        |  | <i>C21orf70</i> | Body    |
| cg07592513 | 19 | 49,994,239  | 9.73E-07 | -0.225 | -0.188 |            |        |  | <i>SNORD35A</i> | TSS200  |
| cg23793965 | 8  | 91,841,347  | 4E-05    | -0.225 | -0.256 |            |        |  | <i>NECAB1</i>   | Body    |
| cg11288686 | 12 | 29,735,807  | 4.98E-10 | -0.225 | -0.212 |            |        |  | <i>TMTC1</i>    | Body    |
| cg22479532 | 4  | 62,450,110  | 0.009904 | -0.225 | -0.151 |            |        |  | <i>LPHN3</i>    | Body    |
| cg10956860 | 5  | 32,175,561  | 3.12E-12 | -0.225 | -0.252 |            |        |  | <i>GOLPH3</i>   | TSS1500 |
| cg24630825 | 4  | 176,909,979 | 1.45E-06 | -0.225 | -0.240 |            |        |  | <i>GPM6A</i>    | 5'UTR   |
| cg23323297 | 19 | 51,195,418  | 0.002723 | -0.225 | -0.225 |            |        |  | <i>SHANK1</i>   | Body    |
| cg21968796 | 21 | 46,358,532  | 1.95E-05 | -0.225 | -0.219 | 0.01592102 | -0.064 |  | <i>C21orf67</i> | Body    |
| cg23406509 | 17 | 31,479,452  | 0.003361 | -0.225 | -0.152 |            |        |  | <i>ACCN1</i>    | Body    |
| cg11214047 | 7  | 92,761,722  | 4.48E-05 | -0.225 | -0.182 |            |        |  | <i>SAMD9L</i>   | Body    |
| cg04084173 | 1  | 48,458,049  | 0.014275 | -0.225 | -0.119 |            |        |  |                 |         |
| cg00170459 | 4  | 136,509,310 | 0.000708 | -0.226 | -0.154 |            |        |  |                 |         |
| cg06817269 | 15 | 59,909,035  | 0.005155 | -0.226 | -0.274 | 1.22E-09   | -0.157 |  | <i>GCNT3</i>    | 5'UTR   |
| cg10717610 | 2  | 394,242     | 0.00045  | -0.226 | -0.261 |            |        |  |                 |         |
| cg18640514 | 7  | 53,664,246  | 0.002657 | -0.226 | -0.199 |            |        |  |                 |         |
| cg05209306 | 19 | 39,899,376  | 2.6E-09  | -0.226 | -0.190 |            |        |  | <i>ZFP36</i>    | 3'UTR   |
| cg07211251 | 5  | 72,989,417  | 6.36E-06 | -0.226 | -0.197 |            |        |  | <i>RGNEF</i>    | Body    |
| cg04955791 | 6  | 152,959,047 | 0.006799 | -0.226 | -0.196 |            |        |  | <i>SYNE1</i>    | TSS1500 |
| cg24884543 | 18 | 77,139,072  | 0.039279 | -0.226 | -0.155 |            |        |  |                 |         |
| cg00532399 | 5  | 171,209,553 | 0.00226  | -0.226 | -0.156 |            |        |  |                 |         |
| cg05285429 | 3  | 77,122,541  | 0.000006 | -0.226 | -0.214 |            |        |  | <i>ROBO2</i>    | Body    |
| cg25920535 | 3  | 196,233,831 | 0.005474 | -0.226 | -0.143 |            |        |  | <i>C3orf43</i>  | 3'UTR   |
| cg02772823 | X  | 115,567,582 | 4.5E-09  | -0.226 | -0.239 |            |        |  | <i>SLC6A14</i>  | TSS200  |
| cg02678638 | 16 | 85,671,115  | 0.001211 | -0.226 | -0.218 |            |        |  | <i>KIAA0182</i> | 5'UTR   |
| cg06872010 | 8  | 12,236,258  | 0.00311  | -0.226 | -0.161 |            |        |  | <i>FAM66A</i>   | Body    |
| cg24423088 | 21 | 32,185,365  | 0.049407 | -0.226 | -0.081 | 0.00771579 | -0.081 |  | <i>KRTAP8-1</i> | 1stExon |
| cg08247866 | 1  | 3,096,529   | 0.011231 | -0.226 | -0.111 |            |        |  | <i>PRDM16</i>   | Body    |

|            |    |             |          |        |        |            |        |  |                   |         |
|------------|----|-------------|----------|--------|--------|------------|--------|--|-------------------|---------|
| cg14347463 | 8  | 129,886,819 | 0.000618 | -0.226 | -0.202 |            |        |  |                   |         |
| cg22164531 | 1  | 192,146,717 | 0.032905 | -0.226 | -0.126 |            |        |  | <i>RGS18</i>      | Body    |
| cg23244540 | 2  | 127,532,388 | 0.012865 | -0.226 | -0.143 |            |        |  |                   |         |
| cg01617018 | 16 | 30,116,135  | 0.002026 | -0.226 | -0.270 |            |        |  | <i>GDPD3</i>      | 3'UTR   |
| cg02571560 | 6  | 32,037,587  | 0.000993 | -0.226 | -0.158 |            |        |  | <i>TNXB</i>       | Body    |
| cg23527409 | 19 | 44,956,065  | 0.017107 | -0.226 | -0.168 |            |        |  |                   |         |
| cg17128024 | 8  | 2,196,833   | 0.003461 | -0.226 | -0.161 |            |        |  |                   |         |
| cg23823833 | 3  | 159,075,576 | 0.000234 | -0.226 | -0.159 |            |        |  | <i>SCHIP1</i>     | Body    |
| cg26403580 | 10 | 120,936,730 | 7.56E-07 | -0.226 | -0.221 |            |        |  | <i>PRDX3</i>      | Body    |
| cg00043591 | 7  | 156,874,860 | 0.001387 | -0.226 | -0.166 |            |        |  |                   |         |
| cg08486180 | 2  | 56,461,845  | 0.026819 | -0.226 | -0.259 |            |        |  | <i>CCDC85A</i>    | Body    |
| cg05139761 | 1  | 4,842,529   | 6.97E-05 | -0.226 | -0.175 |            |        |  | <i>AJAP1</i>      | 3'UTR   |
| cg17385247 | 10 | 115,718,469 | 4.08E-11 | -0.226 | -0.222 |            |        |  |                   |         |
| cg23276912 | 1  | 35,326,118  | 2.21E-12 | -0.226 | -0.229 |            |        |  | <i>C1orf212</i>   | TSS1500 |
| cg11198968 | 10 | 83,676,596  | 0.025507 | -0.226 | -0.128 |            |        |  | <i>NRG3</i>       | Body    |
| cg12114804 | 14 | 70,236,481  | 0.020526 | -0.226 | -0.192 |            |        |  | <i>SFRS5</i>      | Body    |
| cg20738274 | 1  | 207,201,020 | 6.76E-12 | -0.226 | -0.229 |            |        |  | <i>C1orf116</i>   | 5'UTR   |
| cg06759874 | 4  | 186,960,904 | 4.12E-13 | -0.226 | -0.226 |            |        |  |                   |         |
| cg13513349 | 4  | 175,851,061 | 0.014385 | -0.226 | -0.134 |            |        |  | <i>ADAM29</i>     | 5'UTR   |
| cg01763947 | 15 | 92,459,894  | 0.020005 | -0.226 | -0.189 |            |        |  | <i>SLCO3A1</i>    | Body    |
| cg05988964 | 8  | 140,629,559 | 0.013133 | -0.226 | -0.131 |            |        |  | <i>KCNK9</i>      | 3'UTR   |
| cg10821813 | 10 | 129,562,528 | 0.030006 | -0.226 | -0.184 |            |        |  |                   |         |
| cg09242541 | 1  | 10,490,025  | 1.48E-12 | -0.226 | -0.208 | 4E-21      | -0.148 |  | <i>APITD1</i>     | TSS200  |
| cg10138313 | 22 | 44,964,253  | 2.29E-06 | -0.226 | -0.172 |            |        |  | <i>NCRNA00207</i> | TSS1500 |
| cg14284630 | 11 | 56,018,532  | 2.75E-05 | -0.226 | -0.223 |            |        |  | <i>OR5T3</i>      | TSS1500 |
| cg03992092 | X  | 139,169,879 | 0.000281 | -0.226 | -0.221 |            |        |  |                   |         |
| cg15023686 | 18 | 76,675,402  | 3.83E-06 | -0.226 | -0.175 |            |        |  |                   |         |
| cg19532959 | 12 | 65,518,055  | 0.001688 | -0.226 | -0.191 |            |        |  |                   |         |
| cg09059945 | 7  | 130,126,018 | 0.000619 | -0.226 | -0.239 | 0.01226872 | -0.043 |  | <i>MEST</i>       | TSS200  |
| cg02805690 | 1  | 155,895,456 | 0.006556 | -0.226 | -0.178 |            |        |  | <i>KIAA0907</i>   | Body    |
| cg05638689 | 11 | 65,314,454  | 1.8E-17  | -0.226 | -0.248 |            |        |  | <i>LTBP3</i>      | Body    |
| cg27094323 | 7  | 1,216,898   | 0.000454 | -0.226 | -0.149 |            |        |  |                   |         |
| cg26680644 | 1  | 24,920,997  | 4.3E-06  | -0.226 | -0.218 |            |        |  | <i>C1orf130</i>   | 5'UTR   |
| cg01431057 | 1  | 153,362,927 | 0.000194 | -0.226 | -0.195 |            |        |  | <i>S100A8</i>     | Body    |

|            |    |             |          |        |        |  |  |  |                  |         |
|------------|----|-------------|----------|--------|--------|--|--|--|------------------|---------|
| cg16960593 | 6  | 161,087,573 | 0.01057  | -0.226 | -0.220 |  |  |  | <i>LPA</i>       | TSS200  |
| cg24995014 | 22 | 49,934,662  | 0.044846 | -0.226 | -0.070 |  |  |  |                  |         |
| cg16393935 | 11 | 128,263,817 | 5.77E-09 | -0.226 | -0.219 |  |  |  |                  |         |
| cg04530015 | 2  | 215,796,436 | 3.35E-07 | -0.226 | -0.215 |  |  |  | <i>ABCA12</i>    | 3'UTR   |
| cg06254768 | 4  | 114,064,176 | 3.24E-05 | -0.226 | -0.168 |  |  |  | <i>ANK2</i>      | Body    |
| cg01397065 | 19 | 1,908,328   | 7.15E-05 | -0.226 | -0.238 |  |  |  | <i>ADAT3</i>     | 5'UTR   |
| cg03090436 | 6  | 71,121,859  | 0.002426 | -0.226 | -0.257 |  |  |  | <i>FAM135A</i>   | TSS1500 |
| cg00111333 | 1  | 198,828,249 | 0.023005 | -0.226 | -0.094 |  |  |  | <i>MIR181B1</i>  | TSS200  |
| cg02303399 | 1  | 153,175,248 | 0.001617 | -0.226 | -0.176 |  |  |  | <i>LELP1</i>     | TSS1500 |
| cg14219111 | 18 | 13,826,671  | 0.000107 | -0.226 | -0.226 |  |  |  | <i>MC5R</i>      | 1stExon |
| cg14321343 | 22 | 29,838,869  | 2.21E-06 | -0.226 | -0.159 |  |  |  | <i>RFPL1S</i>    | TSS1500 |
| cg10089626 | 1  | 45,969,600  | 0.04438  | -0.226 | -0.122 |  |  |  | <i>MMACHC</i>    | Body    |
| cg18183817 | 3  | 13,665,008  | 0.029048 | -0.226 | -0.268 |  |  |  | <i>FBLN2</i>     | Body    |
| cg04522625 | 3  | 64,751,651  | 2.3E-08  | -0.226 | -0.225 |  |  |  | <i>MIR548A2</i>  | Body    |
| cg10734581 | 14 | 101,520,078 | 0.004337 | -0.226 | -0.225 |  |  |  | <i>MIR134</i>    | TSS1500 |
| cg18218190 | 1  | 201,982,372 | 0.008714 | -0.226 | -0.306 |  |  |  | <i>ELF3</i>      | Body    |
| cg26626829 | 2  | 181,386,053 | 6.54E-11 | -0.226 | -0.213 |  |  |  |                  |         |
| cg07008784 | 1  | 205,498,551 | 4.03E-10 | -0.226 | -0.205 |  |  |  | <i>CDK18</i>     | Body    |
| cg09478995 | 11 | 57,264,045  | 3.29E-06 | -0.226 | -0.166 |  |  |  | <i>SLC43A1</i>   | Body    |
| cg11010561 | 4  | 155,630,610 | 0.000702 | -0.226 | -0.150 |  |  |  |                  |         |
| cg26605760 | 17 | 61,597,601  | 4.38E-09 | -0.226 | -0.219 |  |  |  |                  |         |
| cg03330223 | 16 | 86,371,363  | 0.00253  | -0.226 | -0.197 |  |  |  | <i>LOC732275</i> | Body    |
| cg12277653 | 22 | 50,028,456  | 0.001506 | -0.226 | -0.141 |  |  |  | <i>C22orf34</i>  | Body    |
| cg26486069 | X  | 48,434,354  | 0.000117 | -0.226 | -0.228 |  |  |  | <i>RBM3</i>      | Body    |
| cg00678892 | 2  | 53,543,334  | 0.008561 | -0.226 | -0.202 |  |  |  |                  |         |
| cg08877257 | 16 | 29,820,592  | 1.6E-09  | -0.226 | -0.202 |  |  |  | <i>MAZ</i>       | Body    |
| cg15029475 | 5  | 3,028,202   | 0.018592 | -0.226 | -0.076 |  |  |  |                  |         |
| cg20035127 | 8  | 80,819,477  | 8.61E-05 | -0.226 | -0.246 |  |  |  |                  |         |
| cg20314918 | 2  | 166,151,447 | 0.005082 | -0.226 | -0.164 |  |  |  | <i>SCN2A</i>     | 5'UTR   |
| cg09450260 | 7  | 155,193,250 | 0.00173  | -0.226 | -0.152 |  |  |  |                  |         |
| cg21554588 | 5  | 138,720,378 | 0.001993 | -0.226 | -0.119 |  |  |  | <i>SLC23A1</i>   | TSS1500 |
| cg00032643 | 1  | 3,700,680   | 0.003765 | -0.226 | -0.154 |  |  |  | <i>LRRC47</i>    | Body    |
| cg17503259 | 17 | 32,966,081  | 0.000262 | -0.226 | -0.210 |  |  |  | <i>TMEM132E</i>  | 3'UTR   |
| cg00757453 | X  | 17,986,297  | 2.08E-05 | -0.226 | -0.218 |  |  |  |                  |         |

|            |    |             |          |        |        |  |  |     |                |         |
|------------|----|-------------|----------|--------|--------|--|--|-----|----------------|---------|
| cg10290988 | 11 | 1,673,766   | 0.035273 | -0.226 | -0.167 |  |  |     | <i>HCCA2</i>   | Body    |
| cg17163527 | 1  | 3,447,348   | 1.73E-32 | -0.226 | -0.210 |  |  |     | <i>MEGF6</i>   | Body    |
| cg00252594 | 14 | 102,974,737 | 7.77E-08 | -0.226 | -0.195 |  |  |     | <i>ANKRD9</i>  | 5'UTR   |
| cg02449336 | 7  | 143,805,356 | 1.08E-05 | -0.226 | -0.228 |  |  |     | <i>OR2A2</i>   | TSS1500 |
| cg16784198 | 7  | 157,236,093 | 0.002298 | -0.226 | -0.147 |  |  |     |                |         |
| cg04850842 | 14 | 27,023,180  | 0.009747 | -0.226 | -0.109 |  |  |     | <i>NOVA1</i>   | Body    |
| cg15766408 | 4  | 16,850,240  | 0.035392 | -0.226 | -0.186 |  |  |     | <i>LDB2</i>    | Body    |
| cg23227851 | 3  | 42,633,273  | 1.83E-06 | -0.226 | -0.253 |  |  |     | <i>SS18L2</i>  | Body    |
| cg05046083 | 7  | 111,425,428 | 0.000383 | -0.226 | -0.226 |  |  |     | <i>DOCK4</i>   | Body    |
| cg10815253 | 2  | 116,925,524 | 0.002113 | -0.226 | -0.230 |  |  | Yes |                |         |
| cg02915215 | 8  | 134,467,165 | 3.07E-05 | -0.226 | -0.199 |  |  |     | <i>ST3GAL1</i> | 3'UTR   |
| cg09412619 | 16 | 11,323,792  | 9.07E-05 | -0.226 | -0.249 |  |  |     |                |         |
| cg13978352 | 6  | 30,908,706  | 3.11E-05 | -0.226 | -0.154 |  |  |     | <i>DPCR1</i>   | TSS200  |
| cg18099058 | 11 | 55,737,045  | 0.000242 | -0.226 | -0.236 |  |  |     | <i>OR10AG1</i> | TSS1500 |
| cg05859533 | 16 | 57,727,230  | 0.003034 | -0.227 | -0.223 |  |  |     | <i>CCDC135</i> | TSS1500 |
| cg11384084 | 12 | 132,045,365 | 0.027505 | -0.227 | -0.168 |  |  |     |                |         |
| cg18498565 | 10 | 3,173,604   | 0.007195 | -0.227 | -0.174 |  |  |     | <i>PFKP</i>    | Body    |
| cg24351427 | 1  | 185,670,109 | 0.043348 | -0.227 | -0.126 |  |  |     |                |         |
| cg05385805 | 7  | 143,106,577 | 3.05E-05 | -0.227 | -0.196 |  |  |     | <i>EPHA1</i>   | TSS1500 |
| cg20256009 | 1  | 153,363,020 | 8.64E-08 | -0.227 | -0.203 |  |  |     | <i>S100A8</i>  | 5'UTR   |
| cg03802982 | 16 | 65,089,255  | 0.000449 | -0.227 | -0.189 |  |  |     | <i>CDH11</i>   | 5'UTR   |
| cg15909393 | 2  | 364,075     | 0.026572 | -0.227 | -0.111 |  |  |     |                |         |
| cg18454510 | 6  | 40,363,184  | 0.000258 | -0.227 | -0.250 |  |  |     | <i>LRFN2</i>   | Body    |
| cg24229750 | 11 | 5,531,283   | 0.025157 | -0.227 | -0.235 |  |  |     | <i>UBQLN3</i>  | TSS200  |
| cg04508984 | 22 | 43,536,864  | 7.44E-05 | -0.227 | -0.211 |  |  | Yes | <i>MCAT</i>    | Body    |
| cg09985615 | 4  | 58,291,304  | 0.005961 | -0.227 | -0.143 |  |  |     |                |         |
| cg16639860 | 4  | 20,885,019  | 5.28E-08 | -0.227 | -0.200 |  |  |     | <i>KCNIP4</i>  | Body    |
| cg27092605 | 7  | 93,357,562  | 0.000259 | -0.227 | -0.224 |  |  |     |                |         |
| cg01079019 | 16 | 21,566,602  | 1.71E-08 | -0.227 | -0.171 |  |  |     |                |         |
| cg08084967 | 2  | 137,747,719 | 0.008419 | -0.227 | -0.185 |  |  |     | <i>THSD7B</i>  | TSS1500 |
| cg01766699 | 2  | 196,602,679 | 7.91E-07 | -0.227 | -0.201 |  |  |     | <i>DNAH7</i>   | Body    |
| cg23075139 | 3  | 115,524,031 | 0.0047   | -0.227 | -0.208 |  |  |     | <i>LSAMP</i>   | 3'UTR   |
| cg07874983 | 16 | 62,065,904  | 0.001218 | -0.227 | -0.154 |  |  |     | <i>CDH8</i>    | 5'UTR   |
| cg10666909 | 6  | 32,820,249  | 8.87E-07 | -0.227 | -0.249 |  |  | Yes | <i>TAP1</i>    | Body    |

|            |    |             |          |        |        |            |        |  |                 |         |
|------------|----|-------------|----------|--------|--------|------------|--------|--|-----------------|---------|
| cg15666275 | 19 | 57,274,897  | 0.031408 | -0.227 | -0.233 |            |        |  |                 |         |
| cg22730864 | 1  | 3,161,448   | 6.92E-08 | -0.227 | -0.222 |            |        |  | <i>PRDM16</i>   | Body    |
| cg03102729 | X  | 120,181,504 | 0.006976 | -0.227 | -0.192 |            |        |  | <i>GLUD2</i>    | 5'UTR   |
| cg07774589 | 18 | 73,625,808  | 0.015301 | -0.227 | -0.129 |            |        |  |                 |         |
| cg12848417 | 10 | 108,576,571 | 1.97E-07 | -0.227 | -0.216 |            |        |  | <i>SORCS1</i>   | Body    |
| cg21143441 | 17 | 8,124,011   | 2.63E-10 | -0.227 | -0.228 |            |        |  | <i>C17orf44</i> | Body    |
| cg24562669 | 7  | 97,807,699  | 1.13E-06 | -0.227 | -0.235 |            |        |  | <i>LMTK2</i>    | Body    |
| cg08070235 | 11 | 118,381,379 | 3.97E-07 | -0.227 | -0.205 |            |        |  | <i>MLL</i>      | Body    |
| cg01882991 | 6  | 6,677,756   | 2.22E-11 | -0.227 | -0.186 |            |        |  |                 |         |
| cg10627429 | 10 | 115,511,135 | 5.76E-07 | -0.227 | -0.251 |            |        |  | <i>C10orf81</i> | TSS200  |
| cg16821267 | X  | 27,840,014  | 0.039027 | -0.227 | -0.166 |            |        |  | <i>MAGEB10</i>  | Body    |
| cg00098750 | 16 | 23,727,847  | 0.007547 | -0.227 | -0.183 |            |        |  |                 |         |
| cg27130075 | 13 | 110,935,325 | 0.029322 | -0.227 | -0.141 |            |        |  | <i>COL4A1</i>   | Body    |
| cg01405985 | 19 | 36,345,675  | 1.52E-10 | -0.227 | -0.218 |            |        |  |                 |         |
| cg15357118 | 2  | 128,927,972 | 1.02E-05 | -0.227 | -0.231 |            |        |  | <i>UGGT1</i>    | Body    |
| cg10222734 | 10 | 52,612,019  | 0.004026 | -0.227 | -0.158 |            |        |  | <i>A1CF</i>     | 5'UTR   |
| cg13601993 | 9  | 127,534,760 | 4.15E-06 | -0.227 | -0.185 |            |        |  | <i>NR6A1</i>    | TSS1500 |
| cg11410649 | 1  | 24,122,853  | 6.01E-05 | -0.227 | -0.201 |            |        |  | <i>GALE</i>     | Body    |
| cg16987735 | 1  | 152,759,772 | 0.007366 | -0.227 | -0.227 |            |        |  | <i>LCE1E</i>    | 5'UTR   |
| cg24695977 | 1  | 171,640,387 | 5.75E-07 | -0.227 | -0.233 |            |        |  |                 |         |
| cg27450167 | 2  | 135,272,843 | 3.38E-05 | -0.227 | -0.165 |            |        |  | <i>TMEM163</i>  | Body    |
| cg06314702 | 11 | 104,501,066 | 0.005756 | -0.227 | -0.069 |            |        |  |                 |         |
| cg14894216 | 11 | 65,794,352  | 0.001178 | -0.227 | -0.196 |            |        |  | <i>CATSPER1</i> | TSS1500 |
| cg14710459 | 10 | 15,906,284  | 4.35E-07 | -0.227 | -0.181 |            |        |  |                 |         |
| cg03673470 | 1  | 238,055,429 | 6.21E-05 | -0.227 | -0.159 | 0.00035016 | -0.068 |  | <i>ZP4</i>      | TSS1500 |
| cg24881471 | 17 | 73,996,870  | 0.000179 | -0.227 | -0.132 |            |        |  | <i>CDK3</i>     | TSS200  |
| cg25720825 | 1  | 2,849,682   | 5.72E-07 | -0.227 | -0.220 |            |        |  |                 |         |
| cg20395040 | 13 | 23,310,225  | 0.046079 | -0.227 | -0.167 |            |        |  |                 |         |
| cg10806586 | 14 | 45,366,116  | 2.97E-07 | -0.227 | -0.224 |            |        |  | <i>C14orf28</i> | TSS1500 |
| cg12297501 | 6  | 28,364,357  | 3.99E-07 | -0.227 | -0.270 |            |        |  | <i>ZSCAN12</i>  | Body    |
| cg14240993 | 12 | 132,929,352 | 0.011388 | -0.227 | -0.104 |            |        |  |                 |         |
| cg03078733 | 17 | 14,822,587  | 9.13E-06 | -0.227 | -0.201 |            |        |  |                 |         |
| cg05763609 | 3  | 100,535,443 | 0.043099 | -0.227 | -0.120 |            |        |  | <i>ABI3BP</i>   | Body    |
| cg14406134 | 9  | 117,014,922 | 3.74E-05 | -0.227 | -0.167 |            |        |  | <i>COL27A1</i>  | Body    |



|            |    |             |          |        |        |           |        |  |                 |         |
|------------|----|-------------|----------|--------|--------|-----------|--------|--|-----------------|---------|
| cg02750034 | 15 | 84,320,596  | 9.87E-06 | -0.227 | -0.169 |           |        |  |                 |         |
| cg04031344 | 10 | 130,829,645 | 6.16E-06 | -0.227 | -0.203 |           |        |  |                 |         |
| cg25890048 | 11 | 55,703,443  | 0.021677 | -0.227 | -0.220 | 0.0000647 | -0.117 |  | <i>OR5I1</i>    | 1stExon |
| cg01021196 | 14 | 38,340,164  | 1.25E-05 | -0.227 | -0.227 |           |        |  |                 |         |
| cg08342919 | 7  | 100,894,787 | 0.005626 | -0.227 | -0.212 |           |        |  |                 |         |
| cg23240355 | 17 | 10,276,428  | 0.024294 | -0.227 | -0.117 |           |        |  | <i>MYH13</i>    | TSS200  |
| cg26102295 | 7  | 1,423,622   | 0.036935 | -0.227 | -0.175 |           |        |  |                 |         |
| cg09058554 | 1  | 9,600,721   | 8.87E-06 | -0.227 | -0.215 |           |        |  | <i>SLC25A33</i> | Body    |
| cg02486096 | 19 | 57,373,324  | 6.76E-09 | -0.227 | -0.223 |           |        |  |                 |         |
| cg11384744 | 7  | 16,794,623  | 1.64E-07 | -0.227 | -0.236 |           |        |  | <i>TSPAN13</i>  | Body    |
| cg17372758 | 10 | 73,976,798  | 0.000373 | -0.227 | -0.179 |           |        |  | <i>ASCC1</i>    | TSS1500 |
| cg18899018 | 2  | 119,006,923 | 0.004638 | -0.227 | -0.222 |           |        |  |                 |         |
| cg27232401 | 6  | 127,977,312 | 4.16E-05 | -0.227 | -0.219 |           |        |  |                 |         |
| cg03399574 | 13 | 19,759,420  | 0.006031 | -0.227 | -0.141 |           |        |  |                 |         |
| cg08704660 | 13 | 76,052,395  | 0.002307 | -0.227 | -0.214 |           |        |  | <i>TBC1D4</i>   | Body    |
| cg08151470 | 1  | 10,092,299  | 2.27E-06 | -0.227 | -0.247 | 5.49E-10  | -0.127 |  | <i>UBE4B</i>    | TSS1500 |
| cg25649784 | 8  | 115,565,512 | 2.41E-05 | -0.227 | -0.248 |           |        |  |                 |         |
| cg02674804 | 19 | 1,492,043   | 3.44E-05 | -0.227 | -0.256 | 1.87E-28  | -0.231 |  | <i>REEP6</i>    | Body    |
| cg16212298 | 19 | 51,051,954  | 2.27E-05 | -0.227 | -0.221 |           |        |  | <i>LRRC4B</i>   | Body    |
| cg01565083 | 17 | 80,042,523  | 0.015521 | -0.227 | -0.092 |           |        |  | <i>FASN</i>     | Body    |
| cg11574665 | 2  | 242,580,471 | 0.0067   | -0.227 | -0.125 |           |        |  | <i>ATG4B</i>    | Body    |
| cg03696603 | 16 | 69,111,974  | 4.22E-06 | -0.227 | -0.248 |           |        |  | <i>TMCO7</i>    | Body    |
| cg06741568 | 12 | 129,028,641 | 0.029642 | -0.227 | -0.130 |           |        |  | <i>TMEM132C</i> | Body    |
| cg24157349 | 22 | 47,081,751  | 9.7E-08  | -0.227 | -0.211 |           |        |  | <i>CERK</i>     | 3'UTR   |
| cg20097929 | 10 | 83,464,779  | 0.019054 | -0.227 | -0.121 |           |        |  |                 |         |
| cg11643733 | 12 | 82,148,913  | 0.006855 | -0.227 | -0.136 |           |        |  | <i>PPFIA2</i>   | 5'UTR   |
| cg15552238 | 19 | 14,785,749  | 0.001792 | -0.227 | -0.201 | 6.13E-08  | -0.106 |  | <i>EMR3</i>     | TSS200  |
| cg23165226 | 6  | 31,511,287  | 3.99E-10 | -0.227 | -0.231 |           |        |  | <i>BAT1</i>     | TSS1500 |
| cg24102479 | 1  | 149,259,342 | 0.002086 | -0.227 | -0.236 |           |        |  |                 |         |
| cg04158612 | 16 | 1,157,349   | 0.048528 | -0.227 | -0.164 |           |        |  |                 |         |
| cg18369680 | 20 | 41,984,014  | 0.039995 | -0.227 | -0.109 |           |        |  |                 |         |
| cg24949632 | 4  | 47,032,678  | 0.002458 | -0.227 | -0.192 |           |        |  | <i>GABRB1</i>   | TSS1500 |
| cg01560773 | 21 | 47,428,846  | 0.014922 | -0.228 | -0.143 |           |        |  |                 |         |
| cg06596221 | 12 | 131,416,672 | 0.02599  | -0.228 | -0.096 |           |        |  |                 |         |

|            |    |             |          |        |        |  |  |  |                  |         |
|------------|----|-------------|----------|--------|--------|--|--|--|------------------|---------|
| cg19241878 | 17 | 48,846,189  | 0.000144 | -0.228 | -0.184 |  |  |  | <i>C17orf73</i>  | TSS1500 |
| cg05997059 | 7  | 116,411,780 | 2.79E-07 | -0.228 | -0.210 |  |  |  | <i>MET</i>       | Body    |
| cg21537187 | 7  | 135,662,562 | 2.88E-07 | -0.228 | -0.198 |  |  |  | <i>MTPN</i>      | TSS1500 |
| cg26014580 | 7  | 2,113,781   | 2.37E-07 | -0.228 | -0.221 |  |  |  | <i>MAD1L1</i>    | Body    |
| cg17150898 | 12 | 1,702,116   | 1.22E-19 | -0.228 | -0.206 |  |  |  | <i>FBXL14</i>    | 1stExon |
| cg07450292 | 3  | 76,419,070  | 0.01468  | -0.228 | -0.166 |  |  |  |                  |         |
| cg00279755 | 11 | 103,584,918 | 0.017014 | -0.228 | -0.131 |  |  |  |                  |         |
| cg13758913 | 18 | 24,283,684  | 1.78E-06 | -0.228 | -0.175 |  |  |  | <i>LOC728606</i> | TSS200  |
| cg06967998 | 11 | 132,527,438 | 0.049715 | -0.228 | -0.261 |  |  |  | <i>OPCML</i>     | Body    |
| cg24082526 | 19 | 49,993,125  | 5.7E-17  | -0.228 | -0.224 |  |  |  | <i>RPL13AP5</i>  | Body    |
| cg10626169 | 7  | 48,319,696  | 0.004213 | -0.228 | -0.128 |  |  |  | <i>ABCA13</i>    | Body    |
| cg22349442 | 17 | 39,507,113  | 0.001363 | -0.228 | -0.160 |  |  |  | <i>KRT33A</i>    | TSS200  |
| cg23090936 | 12 | 43,687,522  | 0.001252 | -0.228 | -0.180 |  |  |  |                  |         |
| cg26516680 | 1  | 118,540,478 | 2.99E-07 | -0.228 | -0.224 |  |  |  | <i>SPAG17</i>    | Body    |
| cg03764965 | 2  | 117,971,251 | 0.003631 | -0.228 | -0.256 |  |  |  |                  |         |
| cg21571135 | 4  | 88,038,713  | 1.58E-06 | -0.228 | -0.234 |  |  |  | <i>AFF1</i>      | Body    |
| cg24878051 | 1  | 3,305,115   | 0.000117 | -0.228 | -0.176 |  |  |  | <i>PRDM16</i>    | Body    |
| cg03623568 | 16 | 6,915,990   | 0.016251 | -0.228 | -0.161 |  |  |  | <i>A2BP1</i>     | 5'UTR   |
| cg02075221 | 19 | 51,376,639  | 1.38E-11 | -0.228 | -0.218 |  |  |  | <i>KLK2</i>      | TSS200  |
| cg26874764 | 7  | 63,667,212  | 0.001559 | -0.228 | -0.198 |  |  |  | <i>ZNF735</i>    | TSS1500 |
| cg11345210 | 13 | 60,052,169  | 0.006894 | -0.228 | -0.162 |  |  |  |                  |         |
| cg13860360 | 13 | 33,846,010  | 0.000814 | -0.228 | -0.268 |  |  |  | <i>STARD13</i>   | Body    |
| cg01244043 | 20 | 1,448,437   | 0.000334 | -0.228 | -0.240 |  |  |  | <i>NSFL1C</i>    | TSS200  |
| cg12819873 | 11 | 57,157,632  | 0.001882 | -0.228 | -0.250 |  |  |  | <i>PRG2</i>      | 5'UTR   |
| cg03513858 | 6  | 54,763,001  | 0.013054 | -0.228 | -0.183 |  |  |  | <i>FAM83B</i>    | Body    |
| cg13932473 | 1  | 1,282,742   | 0.000191 | -0.228 | -0.172 |  |  |  | <i>DVL1</i>      | Body    |
| cg17897699 | 8  | 137,806,993 | 0.004092 | -0.228 | -0.123 |  |  |  |                  |         |
| cg01232206 | 16 | 33,044,270  | 0.001101 | -0.228 | -0.191 |  |  |  |                  |         |
| cg03820608 | 11 | 131,547,319 | 0.022408 | -0.228 | -0.195 |  |  |  | <i>NTM</i>       | Body    |
| cg08089153 | 11 | 1,956,292   | 1.3E-06  | -0.228 | -0.176 |  |  |  | <i>TNNT3</i>     | Body    |
| cg12101256 | 1  | 196,547,408 | 0.002497 | -0.228 | -0.151 |  |  |  | <i>KCNT2</i>     | Body    |
| cg03114584 | 4  | 1,534,311   | 0.003819 | -0.228 | -0.137 |  |  |  |                  |         |
| cg11849327 | 10 | 76,682,695  | 0.008974 | -0.228 | -0.164 |  |  |  | <i>MYST4</i>     | Body    |
| cg23648516 | 13 | 78,467,552  | 0.000101 | -0.228 | -0.248 |  |  |  |                  |         |

|            |    |             |          |        |        |  |  |  |                |         |
|------------|----|-------------|----------|--------|--------|--|--|--|----------------|---------|
| cg21592463 | 5  | 85,756,447  | 0.00488  | -0.228 | -0.140 |  |  |  |                |         |
| cg09467433 | 3  | 171,283,606 | 0.000351 | -0.228 | -0.271 |  |  |  |                |         |
| cg03842933 | 4  | 155,244,316 | 0.007744 | -0.228 | -0.151 |  |  |  | <i>DCHS2</i>   | Body    |
| cg16931076 | 12 | 1,702,001   | 5.12E-30 | -0.228 | -0.205 |  |  |  | <i>FBXL14</i>  | Body    |
| cg10076902 | 11 | 1,858,135   | 6.61E-08 | -0.228 | -0.230 |  |  |  | <i>SYT8</i>    | Body    |
| cg11746464 | 2  | 137,748,833 | 5.36E-05 | -0.228 | -0.207 |  |  |  | <i>THSD7B</i>  | Body    |
| cg15035476 | 19 | 46,457,107  | 0.018044 | -0.228 | -0.127 |  |  |  | <i>NOVA2</i>   | Body    |
| cg04209766 | 5  | 114,512,608 | 1.82E-06 | -0.228 | -0.207 |  |  |  | <i>TRIM36</i>  | Body    |
| cg16327839 | 11 | 133,715,264 | 0.019381 | -0.228 | -0.189 |  |  |  | <i>SPATA19</i> | 1stExon |
| cg20340146 | 6  | 160,172,821 | 4.5E-07  | -0.228 | -0.212 |  |  |  | <i>WTAP</i>    | Body    |
| cg01080424 | 7  | 6,520,004   | 0.001123 | -0.228 | -0.190 |  |  |  | <i>KDELR2</i>  | Body    |
| cg14931669 | 6  | 66,497,586  | 0.025743 | -0.228 | -0.204 |  |  |  | <i>MCART3P</i> | TSS200  |
| cg21156912 | 17 | 80,847,546  | 8.43E-05 | -0.228 | -0.220 |  |  |  | <i>TBCD</i>    | Body    |
| cg04490596 | 8  | 32,452,181  | 0.002914 | -0.228 | -0.137 |  |  |  | <i>NRG1</i>    | Body    |
| cg10143323 | 11 | 127,332,027 | 0.03029  | -0.228 | -0.231 |  |  |  |                |         |
| cg20255560 | 8  | 36,347,870  | 0.000368 | -0.228 | -0.190 |  |  |  |                |         |
| cg20910408 | 7  | 44,801,589  | 0.002171 | -0.228 | -0.181 |  |  |  | <i>ZMIZ2</i>   | Body    |
| cg02493544 | 11 | 125,361,336 | 6.41E-05 | -0.228 | -0.217 |  |  |  | <i>FEZ1</i>    | 5'UTR   |
| cg17378966 | 5  | 172,196,746 | 7.71E-06 | -0.228 | -0.223 |  |  |  | <i>DUSP1</i>   | Body    |
| cg21156756 | 14 | 32,866,773  | 1.36E-05 | -0.228 | -0.216 |  |  |  | <i>AKAP6</i>   | 5'UTR   |
| cg20845494 | 13 | 55,576,092  | 0.009599 | -0.228 | -0.213 |  |  |  |                |         |
| cg04926380 | 11 | 44,213,376  | 0.000327 | -0.228 | -0.300 |  |  |  | <i>EXT2</i>    | Body    |
| cg02892650 | 16 | 67,380,234  | 5.15E-08 | -0.228 | -0.205 |  |  |  | <i>LRR36</i>   | Body    |
| cg09326204 | 3  | 121,953,249 | 2.02E-05 | -0.228 | -0.212 |  |  |  | <i>CASR</i>    | 5'UTR   |
| cg27046117 | 1  | 5,125,428   | 0.012896 | -0.228 | -0.098 |  |  |  |                |         |
| cg26930408 | 10 | 50,340,100  | 0.048527 | -0.228 | -0.186 |  |  |  | <i>FAM170B</i> | Body    |
| cg02967056 | 3  | 111,853,315 | 3.31E-06 | -0.228 | -0.239 |  |  |  | <i>GCET2</i>   | TSS1500 |
| cg01951086 | 4  | 111,551,642 | 0.001509 | -0.228 | -0.269 |  |  |  | <i>PITX2</i>   | Body    |
| cg03542322 | 20 | 21,227,215  | 0.000187 | -0.228 | -0.181 |  |  |  | <i>PLK1S1</i>  | 3'UTR   |
| cg09199250 | 11 | 2,191,147   | 8.3E-14  | -0.228 | -0.218 |  |  |  | <i>TH</i>      | Body    |
| cg14887116 | 11 | 124,293,907 | 0.027913 | -0.228 | -0.233 |  |  |  | <i>OR8B4</i>   | 1stExon |
| cg00143527 | 15 | 81,292,171  | 8.38E-12 | -0.228 | -0.231 |  |  |  | <i>MESDC1</i>  | TSS1500 |
| cg24524694 | 10 | 52,829,575  | 0.002962 | -0.228 | -0.186 |  |  |  | <i>PRKG1</i>   | Body    |
| cg05778080 | 17 | 21,832,243  | 0.000574 | -0.228 | -0.189 |  |  |  |                |         |

|            |    |             |          |        |        |  |  |  |                |         |
|------------|----|-------------|----------|--------|--------|--|--|--|----------------|---------|
| cg05527267 | 17 | 1,472,819   | 9.31E-06 | -0.228 | -0.184 |  |  |  |                |         |
| cg23845250 | 12 | 132,944,590 | 6.24E-07 | -0.228 | -0.190 |  |  |  |                |         |
| cg24161057 | 1  | 161,008,811 | 4.92E-13 | -0.228 | -0.234 |  |  |  | <i>TSTD1</i>   | TSS200  |
| cg02420480 | 7  | 41,919,892  | 0.044685 | -0.228 | -0.167 |  |  |  |                |         |
| cg25428846 | 4  | 141,107,931 | 3.37E-05 | -0.228 | -0.184 |  |  |  |                |         |
| cg17519477 | 10 | 83,848,597  | 0.001214 | -0.229 | -0.170 |  |  |  | <i>NRG3</i>    | Body    |
| cg06711333 | 1  | 2,750,406   | 0.000597 | -0.229 | -0.214 |  |  |  |                |         |
| cg14795163 | 1  | 74,620,779  | 0.000504 | -0.229 | -0.155 |  |  |  | <i>LRRIQ3</i>  | Body    |
| cg04824189 | 7  | 80,142,634  | 4.62E-07 | -0.229 | -0.235 |  |  |  | <i>GNAT3</i>   | TSS1500 |
| cg02487712 | 10 | 134,733,396 | 0.008217 | -0.229 | -0.094 |  |  |  |                |         |
| cg06324909 | 16 | 33,574,151  | 0.000567 | -0.229 | -0.211 |  |  |  |                |         |
| cg06755296 | 15 | 98,199,925  | 0.000374 | -0.229 | -0.197 |  |  |  |                |         |
| cg25351550 | 12 | 118,227,792 | 1.05E-06 | -0.229 | -0.194 |  |  |  | <i>KSR2</i>    | Body    |
| cg06120359 | 8  | 127,105,723 | 0.021594 | -0.229 | -0.221 |  |  |  |                |         |
| cg19582128 | 13 | 39,265,218  | 0.008274 | -0.229 | -0.217 |  |  |  | <i>FREM2</i>   | 1stExon |
| cg06842181 | 11 | 2,066,779   | 0.000738 | -0.229 | -0.205 |  |  |  |                |         |
| cg09192940 | 16 | 318,694     | 0.001395 | -0.229 | -0.231 |  |  |  | <i>RGS11</i>   | 3'UTR   |
| cg08678000 | 8  | 89,047,821  | 0.000384 | -0.229 | -0.211 |  |  |  |                |         |
| cg14656774 | 8  | 71,182,802  | 3.3E-05  | -0.229 | -0.193 |  |  |  | <i>NCOA2</i>   | 5'UTR   |
| cg16619721 | 3  | 160,942,782 | 0.000112 | -0.229 | -0.235 |  |  |  | <i>NMD3</i>    | Body    |
| cg20987429 | 8  | 91,553,142  | 0.028184 | -0.229 | -0.169 |  |  |  |                |         |
| cg06152845 | 7  | 1,216,568   | 0.005391 | -0.229 | -0.206 |  |  |  |                |         |
| cg10665263 | 5  | 107,883,502 | 0.006842 | -0.229 | -0.249 |  |  |  |                |         |
| cg10891959 | 13 | 81,432,486  | 0.015063 | -0.229 | -0.123 |  |  |  |                |         |
| cg26259818 | 1  | 181,632,621 | 0.039598 | -0.229 | -0.282 |  |  |  | <i>CACNA1E</i> | Body    |
| cg10143823 | 14 | 28,192,481  | 0.014204 | -0.229 | -0.127 |  |  |  |                |         |
| cg04291014 | 11 | 131,506,437 | 0.048056 | -0.229 | -0.127 |  |  |  | <i>NTM</i>     | Body    |
| cg06995828 | 2  | 84,160,861  | 0.004007 | -0.229 | -0.230 |  |  |  |                |         |
| cg19178742 | 6  | 30,070,099  | 2.11E-07 | -0.229 | -0.233 |  |  |  |                |         |
| cg06084534 | 1  | 158,725,300 | 0.029934 | -0.229 | -0.208 |  |  |  | <i>OR6K6</i>   | 1stExon |
| cg26817755 | 6  | 19,812,885  | 2.9E-08  | -0.229 | -0.211 |  |  |  |                |         |
| cg14961476 | 1  | 9,130,738   | 5.97E-06 | -0.229 | -0.211 |  |  |  | <i>SLC2A5</i>  | TSS1500 |
| cg06580966 | 16 | 7,684,063   | 5.91E-08 | -0.229 | -0.229 |  |  |  | <i>A2BP1</i>   | Body    |
| cg19052042 | 10 | 44,321,465  | 0.048212 | -0.229 | -0.138 |  |  |  |                |         |

|            |    |             |          |        |        |  |  |  |                 |         |
|------------|----|-------------|----------|--------|--------|--|--|--|-----------------|---------|
| cg01620540 | 13 | 47,472,064  | 0.023467 | -0.229 | -0.191 |  |  |  | <i>HTR2A</i>    | TSS1500 |
| cg24151308 | X  | 52,826,694  | 0.015233 | -0.229 | -0.186 |  |  |  | <i>SPANXN5</i>  | TSS1500 |
| cg18110578 | 10 | 50,533,993  | 0.046994 | -0.229 | -0.089 |  |  |  | <i>C10orf71</i> | Body    |
| cg22520372 | 4  | 164,271,492 | 0.010255 | -0.229 | -0.151 |  |  |  | <i>NPY5R</i>    | Body    |
| cg26008650 | 1  | 203,708,794 | 0.031359 | -0.229 | -0.117 |  |  |  | <i>ATP2B4</i>   | 3'UTR   |
| cg19681610 | 1  | 162,148,501 | 1.59E-11 | -0.229 | -0.237 |  |  |  | <i>NOS1AP</i>   | Body    |
| cg24949579 | 11 | 6,024,966   | 0.023363 | -0.229 | -0.168 |  |  |  | <i>OR56A4</i>   | TSS1500 |
| cg24682512 | 7  | 86,277,679  | 0.003381 | -0.229 | -0.245 |  |  |  | <i>GRM3</i>     | 5'UTR   |
| cg04552811 | 3  | 149,708,132 | 6.64E-05 | -0.229 | -0.192 |  |  |  |                 |         |
| cg23858537 | 15 | 72,039,838  | 1.31E-05 | -0.229 | -0.222 |  |  |  | <i>THSD4</i>    | Body    |
| cg24166018 | 10 | 128,021,421 | 0.004135 | -0.229 | -0.236 |  |  |  | <i>ADAM12</i>   | Body    |
| cg23172080 | 5  | 172,168,177 | 2.88E-08 | -0.229 | -0.201 |  |  |  |                 |         |
| cg15209053 | 10 | 87,426,906  | 0.006525 | -0.229 | -0.216 |  |  |  | <i>GRID1</i>    | Body    |
| cg16105569 | 12 | 27,627,468  | 0.01033  | -0.229 | -0.152 |  |  |  | <i>C12orf70</i> | Body    |
| cg02379784 | 5  | 471,326     | 3.67E-05 | -0.229 | -0.222 |  |  |  | <i>LOC25845</i> | Body    |
| cg14080521 | 11 | 27,761,859  | 0.036323 | -0.229 | -0.119 |  |  |  |                 |         |
| cg15623687 | 7  | 112,001,736 | 2.66E-05 | -0.229 | -0.192 |  |  |  |                 |         |
| cg16989719 | 2  | 238,392,110 | 1.07E-06 | -0.229 | -0.176 |  |  |  |                 |         |
| cg19858323 | X  | 151,283,154 | 0.000637 | -0.229 | -0.159 |  |  |  | <i>MAGEA5</i>   | 3'UTR   |
| cg20119532 | 20 | 749,581     | 1.12E-13 | -0.229 | -0.207 |  |  |  | <i>C20orf54</i> | TSS1500 |
| cg26578726 | 14 | 56,289,611  | 1.27E-05 | -0.229 | -0.173 |  |  |  |                 |         |
| cg03532253 | 12 | 56,399,235  | 9.61E-05 | -0.229 | -0.149 |  |  |  | <i>SUOX</i>     | 3'UTR   |
| cg26782825 | 8  | 110,989,116 | 0.002705 | -0.229 | -0.232 |  |  |  |                 |         |
| cg04519327 | 15 | 41,149,780  | 1.05E-05 | -0.229 | -0.237 |  |  |  | <i>SPINT1</i>   | 3'UTR   |
| cg25350065 | 8  | 145,978,427 | 3.67E-08 | -0.229 | -0.260 |  |  |  | <i>ZNF251</i>   | Body    |
| cg10447095 | 16 | 60,678,710  | 0.0003   | -0.229 | -0.199 |  |  |  |                 |         |
| cg24561305 | 13 | 29,149,132  | 3.61E-05 | -0.229 | -0.198 |  |  |  |                 |         |
| cg03020635 | 14 | 82,526,476  | 0.000745 | -0.229 | -0.250 |  |  |  |                 |         |
| cg22457769 | 8  | 144,822,917 | 1.34E-06 | -0.229 | -0.247 |  |  |  |                 |         |
| cg23619890 | 1  | 5,896,050   | 0.030176 | -0.229 | -0.074 |  |  |  |                 |         |
| cg17145652 | 8  | 42,750,650  | 1.34E-09 | -0.229 | -0.203 |  |  |  | <i>RNF170</i>   | 5'UTR   |
| cg25982965 | 6  | 44,253,910  | 0.016969 | -0.229 | -0.135 |  |  |  | <i>TCTE1</i>    | Body    |
| cg03587117 | 11 | 100,227,279 | 0.001197 | -0.229 | -0.165 |  |  |  | <i>CNTN5</i>    | 3'UTR   |
| cg10285618 | 2  | 47,604,745  | 2.86E-10 | -0.229 | -0.223 |  |  |  | <i>MIR559</i>   | TSS200  |

|            |    |             |          |        |        |          |        |  |                  |         |
|------------|----|-------------|----------|--------|--------|----------|--------|--|------------------|---------|
| cg24977541 | 3  | 170,305,197 | 0.001112 | -0.229 | -0.214 |          |        |  | <i>SLC7A14</i>   | TSS1500 |
| cg13696545 | 3  | 55,784,854  | 7.58E-07 | -0.229 | -0.224 |          |        |  | <i>ERC2</i>      | Body    |
| cg03541437 | 1  | 210,485,267 | 0.01179  | -0.229 | -0.148 |          |        |  |                  |         |
| cg02925904 | 16 | 32,165,196  | 0.004667 | -0.229 | -0.135 |          |        |  | <i>HERC2P4</i>   | TSS1500 |
| cg04944300 | 1  | 17,022,524  | 0.001    | -0.229 | -0.186 |          |        |  | <i>ESPNP</i>     | Body    |
| cg13451937 | 17 | 67,710,309  | 3.5E-06  | -0.229 | -0.223 |          |        |  |                  |         |
| cg24395386 | 1  | 3,328,593   | 0.012424 | -0.229 | -0.203 |          |        |  | <i>PRDM16</i>    | Body    |
| cg07788537 | 1  | 2,799,876   | 0.001274 | -0.229 | -0.161 |          |        |  |                  |         |
| cg09228949 | 10 | 50,340,173  | 0.003382 | -0.229 | -0.145 |          |        |  | <i>FAM170B</i>   | Body    |
| cg22272888 | 8  | 27,850,772  | 1.18E-05 | -0.229 | -0.160 |          |        |  | <i>SCARA5</i>    | TSS1500 |
| cg26155152 | 19 | 2,943,999   | 6.66E-06 | -0.229 | -0.253 |          |        |  | <i>ZNF77</i>     | Body    |
| cg05064936 | 17 | 45,764,416  | 2.88E-05 | -0.229 | -0.157 |          |        |  |                  |         |
| cg15246805 | 6  | 133,584,189 | 4.74E-05 | -0.229 | -0.213 |          |        |  | <i>EYA4</i>      | 5'UTR   |
| cg06079495 | 10 | 119,599,940 | 0.017439 | -0.229 | -0.149 |          |        |  |                  |         |
| cg08667569 | 5  | 147,240,402 | 6.65E-08 | -0.229 | -0.203 |          |        |  |                  |         |
| cg03251918 | 4  | 156,298,325 | 0.000315 | -0.229 | -0.238 |          |        |  | <i>MAP9</i>      | TSS1500 |
| cg13905199 | 9  | 103,789,186 | 1.14E-05 | -0.229 | -0.221 |          |        |  |                  |         |
| cg01717047 | 7  | 62,765,320  | 0.006456 | -0.229 | -0.123 |          |        |  | <i>LOC643955</i> | TSS1500 |
| cg06300107 | X  | 63,616,425  | 5.01E-06 | -0.229 | -0.200 |          |        |  | <i>MTMR8</i>     | TSS1500 |
| cg07424912 | 16 | 58,718,915  | 3.42E-06 | -0.229 | -0.218 |          |        |  | <i>SLC38A7</i>   | TSS1500 |
| cg03661929 | 3  | 116,503,715 | 0.005278 | -0.229 | -0.199 |          |        |  |                  |         |
| cg09208942 | 14 | 52,794,647  | 4.54E-10 | -0.229 | -0.258 |          |        |  | <i>PTGER2</i>    | 3'UTR   |
| cg20258486 | 7  | 158,800,888 | 7.46E-05 | -0.229 | -0.193 |          |        |  | <i>LOC154822</i> | TSS200  |
| cg22619910 | 1  | 55,096,622  | 0.000671 | -0.229 | -0.160 |          |        |  | <i>ACOT11</i>    | Body    |
| cg02945019 | 1  | 160,550,488 | 1.57E-06 | -0.229 | -0.193 | 2.19E-07 | -0.139 |  | <i>CD84</i>      | TSS1500 |
| cg04167811 | 8  | 65,152,945  | 0.036252 | -0.229 | -0.144 |          |        |  |                  |         |
| cg05215304 | 2  | 101,402,664 | 3.81E-11 | -0.229 | -0.224 |          |        |  |                  |         |
| cg04745064 | 6  | 29,416,095  | 0.031504 | -0.229 | -0.184 |          |        |  |                  |         |
| cg25112284 | 1  | 31,246,011  | 0.001413 | -0.229 | -0.196 |          |        |  |                  |         |
| cg12261055 | 7  | 41,860,801  | 0.007237 | -0.229 | -0.157 |          |        |  |                  |         |
| cg15158924 | 4  | 21,710,948  | 2.49E-06 | -0.229 | -0.198 |          |        |  | <i>KCNIP4</i>    | 5'UTR   |
| cg02854396 | 12 | 72,696,687  | 0.000766 | -0.229 | -0.170 |          |        |  | <i>TRHDE</i>     | Body    |
| cg11333681 | 1  | 149,232,963 | 0.00387  | -0.229 | -0.150 |          |        |  |                  |         |
| cg26663590 | 16 | 28,959,310  | 2.29E-09 | -0.229 | -0.240 |          |        |  |                  |         |

|            |    |             |          |        |        |  |     |  |                      |         |
|------------|----|-------------|----------|--------|--------|--|-----|--|----------------------|---------|
| cg05303690 | 8  | 32,284,962  | 0.000178 | -0.229 | -0.138 |  |     |  | <i>NRG1</i>          | Body    |
| cg03640051 | 4  | 42,657,689  | 3.42E-10 | -0.229 | -0.238 |  |     |  | <i>ATP8A1</i>        | Body    |
| cg04297995 | 19 | 52,023,213  | 0.000441 | -0.229 | -0.199 |  |     |  | <i>SIGLEC6</i>       | 3'UTR   |
| cg05762612 | 18 | 76,260,568  | 0.010603 | -0.229 | -0.123 |  |     |  |                      |         |
| cg08199529 | 11 | 104,894,514 | 0.003514 | -0.229 | -0.127 |  |     |  | <i>CASP5</i>         | TSS1500 |
| cg01174441 | 18 | 52,262,555  | 3.16E-05 | -0.230 | -0.209 |  |     |  | <i>C18orf26</i>      | Body    |
| cg02186027 | 4  | 189,580,798 | 3.42E-05 | -0.230 | -0.227 |  |     |  |                      |         |
| cg06501157 | 2  | 52,856,495  | 0.036889 | -0.230 | -0.080 |  |     |  |                      |         |
| cg17001753 | 6  | 44,254,089  | 0.026776 | -0.230 | -0.137 |  |     |  | <i>TCTE1</i>         | Body    |
| cg03324851 | 7  | 100,274,414 | 2.45E-12 | -0.230 | -0.201 |  |     |  | <i>GNB2</i>          | Body    |
| cg06372145 | 20 | 29,979,846  | 0.012407 | -0.230 | -0.177 |  |     |  | <i>DEFB119</i>       | TSS1500 |
| cg15071463 | 1  | 116,854,912 | 5.83E-06 | -0.230 | -0.234 |  |     |  |                      |         |
| cg18391442 | 2  | 56,318,614  | 0.015957 | -0.230 | -0.120 |  |     |  |                      |         |
| cg05825085 | 16 | 86,379,872  | 0.000658 | -0.230 | -0.207 |  |     |  | <i>LOC732275</i>     | TSS1500 |
| cg21823425 | 11 | 123,757,331 | 0.000379 | -0.230 | -0.224 |  |     |  | <i>TMEM225</i>       | TSS1500 |
| cg16447311 | 6  | 1,604,134   | 2.07E-07 | -0.230 | -0.220 |  |     |  |                      |         |
| cg19448144 | 6  | 32,169,707  | 0.001997 | -0.230 | -0.105 |  |     |  | <i>NOTCH4</i>        | Body    |
| cg02283042 | 16 | 83,200,382  | 1.88E-06 | -0.230 | -0.208 |  |     |  | <i>CDH13</i>         | Body    |
| cg19840494 | 14 | 89,606,221  | 0.006312 | -0.230 | -0.286 |  |     |  |                      |         |
| cg22135279 | 11 | 124,055,251 | 0.006451 | -0.230 | -0.204 |  |     |  |                      |         |
| cg14353278 | 2  | 21,229,231  | 0.041878 | -0.230 | -0.154 |  |     |  | <i>APOB</i>          | Body    |
| cg15247483 | 3  | 111,853,297 | 0.001317 | -0.230 | -0.187 |  |     |  | <i>GCET2</i>         | TSS1500 |
| cg21825792 | 12 | 5,015,078   | 0.02902  | -0.230 | -0.144 |  |     |  |                      |         |
| cg17291924 | X  | 140,756,646 | 0.003051 | -0.230 | -0.203 |  |     |  |                      |         |
| cg00851261 | 19 | 1,526,651   | 0.005074 | -0.230 | -0.109 |  | Yes |  | <i>PLK5P</i>         | Body    |
| cg04060317 | 12 | 5,603,248   | 0.00079  | -0.230 | -0.177 |  |     |  | <i>NTF3</i>          | TSS200  |
| cg21328389 | 8  | 109,145,172 | 0.021181 | -0.230 | -0.258 |  |     |  |                      |         |
| cg23575349 | 11 | 88,800,388  | 0.005741 | -0.230 | -0.143 |  |     |  |                      |         |
| cg26119806 | 2  | 18,061,572  | 4.55E-10 | -0.230 | -0.243 |  |     |  | <i>KCNS3</i>         | 5'UTR   |
| cg24928023 | 21 | 45,395,775  | 0.00229  | -0.230 | -0.143 |  |     |  | <i>AGPAT3</i>        | Body    |
| cg08508335 | 13 | 19,692,412  | 0.000846 | -0.230 | -0.161 |  |     |  | <i>DKFZp686A1627</i> | Body    |
| cg04388863 | 16 | 48,269,349  | 0.000203 | -0.230 | -0.194 |  |     |  | <i>ABCC11</i>        | TSS1500 |
| cg14948379 | 2  | 105,657,348 | 0.000192 | -0.230 | -0.233 |  |     |  | <i>MRPS9</i>         | Body    |
| cg18446069 | 13 | 111,644,279 | 0.016793 | -0.230 | -0.115 |  |     |  |                      |         |

|            |    |             |          |        |        |          |        |     |                  |         |
|------------|----|-------------|----------|--------|--------|----------|--------|-----|------------------|---------|
| cg11341142 | 12 | 72,152,267  | 7.82E-08 | -0.230 | -0.214 |          |        |     | <i>RAB21</i>     | Body    |
| cg16792071 | 10 | 134,842,795 | 0.0026   | -0.230 | -0.182 |          |        |     |                  |         |
| cg02133070 | 4  | 104,637,628 | 2.2E-05  | -0.230 | -0.154 |          |        |     | <i>TACR3</i>     | Body    |
| cg08400475 | 1  | 158,390,842 | 0.034874 | -0.230 | -0.162 |          |        |     | <i>OR10K2</i>    | TSS200  |
| cg21643939 | 3  | 172,467,326 | 4.37E-06 | -0.230 | -0.211 |          |        |     |                  |         |
| cg06902828 | 8  | 92,647,788  | 0.001078 | -0.230 | -0.190 |          |        |     |                  |         |
| cg15659974 | X  | 115,567,527 | 1.74E-07 | -0.230 | -0.250 |          |        | Yes | <i>SLC6A14</i>   | TSS1500 |
| cg19263469 | 7  | 63,655,394  | 4.11E-11 | -0.230 | -0.204 |          |        |     |                  |         |
| cg21802682 | 11 | 69,682,593  | 2.46E-05 | -0.230 | -0.257 |          |        |     |                  |         |
| cg00382930 | 16 | 87,100,229  | 0.009016 | -0.230 | -0.092 |          |        |     |                  |         |
| cg00436435 | 6  | 30,119,889  | 2.9E-07  | -0.230 | -0.197 |          |        |     | <i>TRIM10</i>    | 3'UTR   |
| cg03762767 | X  | 27,884,673  | 0.025558 | -0.230 | -0.117 |          |        |     |                  |         |
| cg22026150 | 8  | 50,653,870  | 0.012886 | -0.230 | -0.148 |          |        |     |                  |         |
| cg01699693 | 11 | 124,181,447 | 0.019723 | -0.230 | -0.220 |          |        |     | <i>OR8D1</i>     | TSS1500 |
| cg02292206 | 7  | 149,569,715 | 0.001022 | -0.230 | -0.205 |          |        |     | <i>ATP6V0E2</i>  | TSS1500 |
| cg19459470 | 11 | 131,199,383 | 0.000292 | -0.230 | -0.210 |          |        |     |                  |         |
| cg24868292 | 1  | 84,876,625  | 3.19E-07 | -0.230 | -0.228 |          |        |     | <i>DNASE2B</i>   | 5'UTR   |
| cg02642585 | 21 | 32,202,284  | 0.014912 | -0.230 | -0.162 |          |        |     | <i>KRTAP7-1</i>  | TSS1500 |
| cg03895540 | 11 | 5,841,482   | 6.74E-05 | -0.230 | -0.189 |          |        |     | <i>OR52N2</i>    | TSS200  |
| cg14386870 | 16 | 2,013,110   | 2.84E-11 | -0.230 | -0.251 |          |        |     | <i>SNORA10</i>   | TSS1500 |
| cg06837325 | 5  | 97,445,281  | 0.002366 | -0.230 | -0.225 |          |        |     |                  |         |
| cg08272996 | 16 | 64,128,218  | 0.002893 | -0.230 | -0.206 |          |        |     |                  |         |
| cg10767420 | 2  | 2,581,557   | 0.000814 | -0.230 | -0.244 |          |        |     |                  |         |
| cg06514727 | 1  | 198,711,467 | 0.041399 | -0.230 | -0.113 |          |        |     | <i>PTPRC</i>     | Body    |
| cg00629688 | 11 | 105,479,843 | 1.39E-05 | -0.230 | -0.189 |          |        |     | <i>GRIA4</i>     | TSS1500 |
| cg11976616 | 5  | 41,213,172  | 0.003426 | -0.230 | -0.141 | 8.04E-09 | -0.126 |     | <i>C6</i>        | 5'UTR   |
| cg25711239 | 17 | 73,996,656  | 3.27E-05 | -0.230 | -0.160 |          |        |     | <i>CDK3</i>      | TSS1500 |
| cg07851738 | 8  | 131,896,788 | 1.08E-06 | -0.230 | -0.242 |          |        |     | <i>ADCY8</i>     | Body    |
| cg09979311 | 16 | 1,730,579   | 0.012537 | -0.230 | -0.273 |          |        |     | <i>HN1L</i>      | Body    |
| cg14284187 | 9  | 116,355,097 | 1.85E-08 | -0.230 | -0.227 |          |        |     | <i>RGS3</i>      | Body    |
| cg16802855 | 16 | 86,371,130  | 0.035522 | -0.230 | -0.161 |          |        |     | <i>LOC732275</i> | Body    |
| cg06194602 | 17 | 61,997,056  | 0.005556 | -0.230 | -0.143 |          |        |     | <i>GH1</i>       | TSS1500 |
| cg19480470 | 2  | 559,042     | 2.09E-08 | -0.230 | -0.229 |          |        |     |                  |         |
| cg19951409 | 18 | 74,175,071  | 0.031742 | -0.230 | -0.183 |          |        |     | <i>ZNF516</i>    | TSS200  |



|            |    |             |          |        |        |          |        |  |               |         |
|------------|----|-------------|----------|--------|--------|----------|--------|--|---------------|---------|
| cg22543892 | 7  | 85,157,964  | 0.00214  | -0.230 | -0.177 |          |        |  |               |         |
| cg03287339 | 16 | 711,135     | 6E-16    | -0.230 | -0.227 |          |        |  | <i>WDR90</i>  | Body    |
| cg06789677 | 10 | 108,525,625 | 0.016687 | -0.230 | -0.166 |          |        |  | <i>SORCS1</i> | Body    |
| cg13700912 | 7  | 1,968,348   | 1.9E-07  | -0.230 | -0.236 |          |        |  | <i>MAD1L1</i> | Body    |
| cg24080902 | 18 | 73,631,749  | 0.013311 | -0.230 | -0.172 |          |        |  |               |         |
| cg06217320 | 11 | 132,112,645 | 0.018706 | -0.230 | -0.159 |          |        |  | <i>NTM</i>    | Body    |
| cg23120936 | 6  | 44,251,344  | 0.004111 | -0.230 | -0.173 |          |        |  | <i>TCTE1</i>  | Body    |
| cg23634451 | 3  | 100,713,646 | 0.021539 | -0.230 | -0.149 |          |        |  | <i>ABI3BP</i> | TSS1500 |
| cg14445205 | 8  | 72,565,468  | 0.020333 | -0.230 | -0.167 |          |        |  |               |         |
| cg25312122 | 1  | 160,184,732 | 1.24E-06 | -0.230 | -0.230 |          |        |  | <i>PEA15</i>  | 3'UTR   |
| cg14318001 | 14 | 70,236,385  | 0.005774 | -0.230 | -0.195 |          |        |  | <i>SFRS5</i>  | Body    |
| cg17596359 | 13 | 114,844,124 | 3.67E-09 | -0.230 | -0.214 |          |        |  | <i>RASA3</i>  | Body    |
| cg01883966 | 6  | 31,938,886  | 1.31E-06 | -0.230 | -0.217 | 2.26E-24 | -0.192 |  | <i>STK19</i>  | TSS200  |
| cg00988175 | 11 | 59,481,031  | 0.014311 | -0.230 | -0.201 |          |        |  | <i>OR10V1</i> | 1stExon |
| cg12576411 | 13 | 22,694,106  | 0.019161 | -0.230 | -0.252 |          |        |  |               |         |
| cg17979595 | 5  | 175,995,850 | 0.030351 | -0.230 | -0.101 |          |        |  | <i>PCDH24</i> | Body    |
| cg06702891 | 12 | 132,872,081 | 0.009046 | -0.230 | -0.106 |          |        |  | <i>GALNT9</i> | Body    |
| cg03641797 | 7  | 5,396,436   | 0.026095 | -0.230 | -0.261 |          |        |  | <i>TNRC18</i> | Body    |
| cg03722396 | 4  | 111,537,907 | 0.047889 | -0.230 | -0.129 |          |        |  |               |         |
| cg08242576 | 1  | 153,177,188 | 0.006751 | -0.230 | -0.165 |          |        |  | <i>LELP1</i>  | Body    |
| cg02576228 | 16 | 7,702,102   | 0.017466 | -0.231 | -0.123 |          |        |  | <i>A2BP1</i>  | Body    |
| cg04846348 | 6  | 25,024,044  | 0.003168 | -0.231 | -0.203 |          |        |  |               |         |
| cg26757472 | 16 | 86,387,131  | 0.022194 | -0.231 | -0.145 |          |        |  |               |         |
| cg02197192 | 8  | 64,968,883  | 0.010247 | -0.231 | -0.172 |          |        |  |               |         |
| cg02708121 | 4  | 16,670,376  | 0.016757 | -0.231 | -0.098 |          |        |  | <i>LDB2</i>   | Body    |
| cg14171986 | 11 | 4,629,749   | 0.000182 | -0.231 | -0.236 |          |        |  | <i>TRIM68</i> | TSS1500 |
| cg07837520 | 16 | 19,871,730  | 1.96E-05 | -0.231 | -0.250 |          |        |  | <i>GPRC5B</i> | 3'UTR   |
| cg00781378 | 3  | 173,999,704 | 9.02E-14 | -0.231 | -0.241 |          |        |  | <i>NLGN1</i>  | 3'UTR   |
| cg09233156 | 15 | 96,531,769  | 2.39E-05 | -0.231 | -0.250 |          |        |  |               |         |
| cg11583211 | 1  | 152,769,246 | 0.000353 | -0.231 | -0.199 |          |        |  | <i>LCE1D</i>  | 5'UTR   |
| cg13753460 | 14 | 101,520,989 | 0.000825 | -0.231 | -0.247 |          |        |  | <i>MIR134</i> | TSS200  |
| cg15079124 | 7  | 142,829,213 | 0.001995 | -0.231 | -0.152 |          |        |  | <i>PIP</i>    | 1stExon |
| cg05868547 | 2  | 115,425,220 | 0.001803 | -0.231 | -0.243 |          |        |  | <i>DPP10</i>  | Body    |
| cg01002636 | 21 | 15,588,120  | 0.001275 | -0.231 | -0.139 |          |        |  | <i>RBM11</i>  | TSS1500 |

|            |    |             |          |        |        |            |        |     |                |         |
|------------|----|-------------|----------|--------|--------|------------|--------|-----|----------------|---------|
| cg19765196 | 3  | 105,299,405 | 2.66E-08 | -0.231 | -0.212 |            |        |     |                |         |
| cg27258486 | 12 | 130,420,637 | 0.012227 | -0.231 | -0.160 |            |        |     |                |         |
| cg21792737 | 6  | 155,776,999 | 1.01E-11 | -0.231 | -0.217 | 0.01216615 | -0.054 |     | <i>NOX3</i>    | 1stExon |
| cg18324583 | 5  | 142,975,083 | 2.48E-11 | -0.231 | -0.235 |            |        |     |                |         |
| cg24377285 | 19 | 38,943,724  | 2.48E-05 | -0.231 | -0.152 |            |        |     | <i>RYR1</i>    | Body    |
| cg12386752 | 1  | 143,907,550 | 1.36E-11 | -0.231 | -0.226 |            |        |     | <i>FAM72D</i>  | Body    |
| cg04214938 | 2  | 119,496,171 | 0.014731 | -0.231 | -0.124 |            |        |     |                |         |
| cg12373951 | 3  | 133,503,437 | 0.000384 | -0.231 | -0.238 |            |        |     |                |         |
| cg10680621 | 5  | 139,069,449 | 7.94E-13 | -0.231 | -0.215 |            |        |     |                |         |
| cg27073431 | 2  | 47,404,636  | 4.81E-09 | -0.231 | -0.207 |            |        |     | <i>CALM2</i>   | TSS1500 |
| cg03718411 | 5  | 31,280,802  | 0.001962 | -0.231 | -0.250 |            |        |     | <i>CDH6</i>    | Body    |
| cg09437783 | 2  | 88,747,976  | 0.003579 | -0.231 | -0.155 |            |        |     | <i>FOXI3</i>   | Body    |
| cg14884160 | 7  | 89,840,396  | 3.45E-24 | -0.231 | -0.216 |            |        |     | <i>STEAP2</i>  | TSS1500 |
| cg11731805 | 19 | 35,637,957  | 0.000479 | -0.231 | -0.166 |            |        |     | <i>FXYP7</i>   | Body    |
| cg00163541 | 1  | 238,811,442 | 8.36E-05 | -0.231 | -0.215 |            |        |     |                |         |
| cg25946540 | 20 | 30,028,418  | 0.024046 | -0.231 | -0.181 |            |        |     | <i>DEFB123</i> | 1stExon |
| cg00543684 | 13 | 113,652,980 | 0.004804 | -0.231 | -0.182 |            |        |     | <i>MCF2L</i>   | Body    |
| cg27220660 | 16 | 29,820,429  | 3.07E-17 | -0.231 | -0.225 |            |        |     | <i>MAZ</i>     | Body    |
| cg06582250 | 11 | 133,445,802 | 0.003614 | -0.231 | -0.153 |            |        |     |                |         |
| cg19866594 | 8  | 73,848,457  | 0.010936 | -0.231 | -0.185 |            |        |     | <i>KCNB2</i>   | Body    |
| cg21462633 | 2  | 239,437,806 | 0.003616 | -0.231 | -0.283 |            |        |     |                |         |
| cg09329930 | 2  | 223,135,786 | 4.7E-07  | -0.231 | -0.249 |            |        |     | <i>PAX3</i>    | Body    |
| cg12727680 | 3  | 75,959,386  | 0.014835 | -0.231 | -0.179 |            |        |     |                |         |
| cg11966284 | 1  | 2,774,346   | 8.65E-05 | -0.231 | -0.192 |            |        | Yes |                |         |
| cg14319135 | 7  | 63,667,452  | 0.006425 | -0.231 | -0.167 |            |        |     | <i>ZNF735</i>  | TSS200  |
| cg20844619 | 4  | 152,875,860 | 0.001992 | -0.231 | -0.157 |            |        |     |                |         |
| cg02840936 | 1  | 20,492,386  | 0.014062 | -0.231 | -0.331 |            |        |     | <i>PLA2G2C</i> | Body    |
| cg01456609 | 16 | 25,700,781  | 9.11E-13 | -0.231 | -0.224 |            |        |     |                |         |
| cg06833778 | 1  | 241,464,644 | 0.001317 | -0.231 | -0.235 |            |        |     | <i>RGS7</i>    | Body    |
| cg17129188 | 8  | 134,307,597 | 3.43E-06 | -0.231 | -0.233 |            |        |     | <i>NDRG1</i>   | 5'UTR   |
| cg03328485 | 16 | 62,267,020  | 0.008653 | -0.231 | -0.127 |            |        |     |                |         |
| cg21367256 | 20 | 62,795,658  | 0.024885 | -0.231 | -0.195 |            |        |     | <i>MYT1</i>    | TSS200  |
| cg22914987 | 12 | 4,054,555   | 0.018461 | -0.231 | -0.144 |            |        |     |                |         |
| cg16642695 | 8  | 67,343,633  | 8.73E-09 | -0.231 | -0.225 |            |        |     | <i>ADHFE1</i>  | TSS1500 |

|            |    |             |          |        |        |  |  |  |                  |         |
|------------|----|-------------|----------|--------|--------|--|--|--|------------------|---------|
| cg25502462 | X  | 48,620,142  | 0.001021 | -0.231 | -0.271 |  |  |  | <i>GLOD5</i>     | TSS200  |
| cg01092932 | 1  | 198,828,060 | 0.047491 | -0.231 | -0.106 |  |  |  | <i>MIR181B1</i>  | Body    |
| cg02167456 | X  | 147,800,736 | 0.007936 | -0.231 | -0.218 |  |  |  | <i>AFF2</i>      | Body    |
| cg24382712 | 10 | 119,802,739 | 1.02E-05 | -0.231 | -0.197 |  |  |  | <i>RAB11FIP2</i> | Body    |
| cg10422455 | 11 | 19,083,542  | 0.00183  | -0.231 | -0.158 |  |  |  | <i>MRGPRX2</i>   | TSS1500 |
| cg21098892 | 19 | 534,887     | 2.86E-05 | -0.231 | -0.136 |  |  |  | <i>CDC34</i>     | Body    |
| cg19576556 | 17 | 80,024,177  | 3.9E-05  | -0.231 | -0.200 |  |  |  | <i>DUS1L</i>     | TSS1500 |
| cg05142677 | 16 | 88,601,446  | 6.78E-09 | -0.231 | -0.198 |  |  |  | <i>ZFPM1</i>     | 3'UTR   |
| cg19864808 | 6  | 31,938,773  | 3.93E-10 | -0.231 | -0.233 |  |  |  | <i>STK19</i>     | TSS200  |
| cg10021288 | 2  | 128,175,891 | 0.000551 | -0.231 | -0.186 |  |  |  | <i>PROC</i>      | TSS200  |
| cg21803927 | 8  | 14,412,919  | 4.5E-06  | -0.231 | -0.230 |  |  |  | <i>SGCZ</i>      | Body    |
| cg23496571 | 20 | 30,644,728  | 4.28E-05 | -0.231 | -0.187 |  |  |  | <i>HCK</i>       | Body    |
| cg00007076 | 8  | 67,342,600  | 2.64E-15 | -0.231 | -0.224 |  |  |  | <i>RRS1</i>      | 1stExon |
| cg02703563 | 10 | 91,852,861  | 7.13E-05 | -0.231 | -0.280 |  |  |  |                  |         |
| cg21688152 | 17 | 80,926,101  | 0.006154 | -0.231 | -0.276 |  |  |  | <i>B3GNTL1</i>   | Body    |
| cg00345366 | 11 | 18,128,177  | 2.88E-08 | -0.231 | -0.194 |  |  |  | <i>SAAL1</i>     | TSS1500 |
| cg02215357 | 13 | 53,191,046  | 0.000108 | -0.231 | -0.227 |  |  |  | <i>HNRNPA1L2</i> | TSS1500 |
| cg15403616 | 14 | 105,658,685 | 0.00444  | -0.231 | -0.126 |  |  |  |                  |         |
| cg11838237 | 5  | 1,752,864   | 0.009648 | -0.231 | -0.130 |  |  |  |                  |         |
| cg18247124 | 11 | 122,943,141 | 6.06E-06 | -0.231 | -0.228 |  |  |  | <i>ASAM</i>      | 3'UTR   |
| cg22602592 | 20 | 61,956,679  | 0.000985 | -0.231 | -0.136 |  |  |  | <i>COL20A1</i>   | Body    |
| cg11937849 | 3  | 76,292,114  | 0.0307   | -0.231 | -0.100 |  |  |  |                  |         |
| cg25237113 | 2  | 80,551,812  | 0.000347 | -0.231 | -0.285 |  |  |  | <i>CTNNA2</i>    | Body    |
| cg05999628 | 17 | 32,612,684  | 7.34E-07 | -0.231 | -0.227 |  |  |  | <i>CCL11</i>     | TSS200  |
| cg16204066 | 6  | 33,638,922  | 0.0193   | -0.231 | -0.136 |  |  |  | <i>ITPR3</i>     | Body    |
| cg24009250 | 14 | 98,017,621  | 0.000594 | -0.231 | -0.181 |  |  |  |                  |         |
| cg06560282 | 11 | 103,830,847 | 0.000561 | -0.231 | -0.149 |  |  |  | <i>PDGFD</i>     | Body    |
| cg14567374 | 9  | 140,084,348 | 1.42E-10 | -0.231 | -0.218 |  |  |  | <i>ANAPC2</i>    | TSS1500 |
| cg14943002 | 11 | 47,256,035  | 6.64E-10 | -0.231 | -0.213 |  |  |  | <i>DDB2</i>      | Body    |
| cg00432659 | 18 | 11,151,283  | 0.003251 | -0.231 | -0.164 |  |  |  |                  |         |
| cg09165554 | 16 | 33,935,224  | 0.003965 | -0.231 | -0.186 |  |  |  |                  |         |
| cg12377641 | 10 | 11,868,179  | 0.040293 | -0.231 | -0.131 |  |  |  | <i>C10orf47</i>  | 5'UTR   |
| cg13917968 | 5  | 151,504,425 | 0.019968 | -0.231 | -0.250 |  |  |  |                  |         |
| cg00921682 | 19 | 42,081,255  | 0.000482 | -0.231 | -0.188 |  |  |  | <i>CEACAM21</i>  | TSS1500 |

|            |    |             |          |        |        |  |  |  |                  |         |
|------------|----|-------------|----------|--------|--------|--|--|--|------------------|---------|
| cg04811706 | 16 | 55,686,715  | 0.028238 | -0.231 | -0.082 |  |  |  |                  |         |
| cg26017484 | 1  | 3,322,309   | 0.00069  | -0.231 | -0.220 |  |  |  | <i>PRDM16</i>    | Body    |
| cg14500932 | 9  | 126,534,337 | 3.97E-08 | -0.231 | -0.190 |  |  |  | <i>DENND1A</i>   | Body    |
| cg17679980 | 11 | 22,696,306  | 2.07E-08 | -0.231 | -0.236 |  |  |  | <i>GAS2</i>      | 5'UTR   |
| cg14788655 | 11 | 40,224,146  | 0.029425 | -0.231 | -0.202 |  |  |  | <i>LRR4C</i>     | 5'UTR   |
| cg25331127 | 10 | 133,608,464 | 0.011629 | -0.231 | -0.152 |  |  |  |                  |         |
| cg24669741 | 1  | 186,265,423 | 4.92E-06 | -0.231 | -0.221 |  |  |  | <i>PRG4</i>      | 1stExon |
| cg12156167 | 8  | 133,760,274 | 0.032005 | -0.231 | -0.168 |  |  |  | <i>TMEM71</i>    | Body    |
| cg24556382 | 4  | 174,173,455 | 0.001577 | -0.231 | -0.204 |  |  |  | <i>GALNT7</i>    | Body    |
| cg02546833 | 15 | 53,372,675  | 0.006583 | -0.231 | -0.149 |  |  |  |                  |         |
| cg20901032 | 13 | 37,680,691  | 7.2E-05  | -0.231 | -0.207 |  |  |  | <i>CSNK1A1L</i>  | TSS1500 |
| cg17576736 | 13 | 112,908,450 | 0.005711 | -0.231 | -0.154 |  |  |  |                  |         |
| cg23462788 | 3  | 38,941,491  | 0.012136 | -0.231 | -0.181 |  |  |  | <i>SCN11A</i>    | Body    |
| cg14286486 | 10 | 105,125,108 | 1.03E-05 | -0.231 | -0.240 |  |  |  |                  |         |
| cg03581262 | 2  | 106,192,732 | 1.77E-17 | -0.231 | -0.212 |  |  |  |                  |         |
| cg14006798 | 20 | 30,222,136  | 0.000409 | -0.231 | -0.105 |  |  |  |                  |         |
| cg07891457 | 11 | 67,442,075  | 1.76E-06 | -0.231 | -0.223 |  |  |  | <i>ALDH3B2</i>   | 1stExon |
| cg03037761 | 11 | 86,663,341  | 4.1E-10  | -0.231 | -0.179 |  |  |  | <i>FZD4</i>      | Body    |
| cg07236204 | 1  | 199,372,786 | 0.004304 | -0.231 | -0.230 |  |  |  |                  |         |
| cg09513758 | 1  | 110,526,368 | 1.8E-08  | -0.231 | -0.204 |  |  |  | <i>AHCYL1</i>    | TSS1500 |
| cg15499275 | 1  | 9,780,620   | 2.67E-05 | -0.231 | -0.173 |  |  |  | <i>PIK3CD</i>    | Body    |
| cg00334056 | 6  | 33,755,658  | 3.66E-09 | -0.232 | -0.225 |  |  |  | <i>LEMD2</i>     | Body    |
| cg15484808 | 6  | 33,242,542  | 1.78E-10 | -0.232 | -0.236 |  |  |  | <i>RPS18</i>     | Body    |
| cg02583247 | 12 | 4,555,311   | 0.018427 | -0.232 | -0.111 |  |  |  | <i>FGF6</i>      | TSS1500 |
| cg17186132 | 15 | 90,703,444  | 2.49E-09 | -0.232 | -0.238 |  |  |  |                  |         |
| cg01571916 | 11 | 44,881,716  | 0.000403 | -0.232 | -0.159 |  |  |  | <i>TSPAN18</i>   | 5'UTR   |
| cg12930930 | 11 | 5,372,503   | 0.008944 | -0.232 | -0.236 |  |  |  | <i>OR51B6</i>    | TSS1500 |
| cg20562823 | 4  | 63,872,386  | 0.000509 | -0.232 | -0.195 |  |  |  |                  |         |
| cg17976205 | 20 | 61,002,857  | 1.27E-06 | -0.232 | -0.241 |  |  |  | <i>C20orf151</i> | TSS1500 |
| cg02630628 | 19 | 50,116,703  | 4.14E-07 | -0.232 | -0.202 |  |  |  | <i>PRR12</i>     | Body    |
| cg22377480 | 3  | 35,934,217  | 0.004299 | -0.232 | -0.152 |  |  |  |                  |         |
| cg22792177 | 1  | 1,912,606   | 0.017019 | -0.232 | -0.150 |  |  |  | <i>KIAA1751</i>  | Body    |
| cg05936516 | 5  | 114,507,066 | 1.49E-10 | -0.232 | -0.245 |  |  |  | <i>TRIM36</i>    | Body    |
| cg05149258 | 5  | 13,944,584  | 1.16E-05 | -0.232 | -0.235 |  |  |  | <i>DNAH5</i>     | 1stExon |

|            |    |             |          |        |        |          |        |     |                  |         |
|------------|----|-------------|----------|--------|--------|----------|--------|-----|------------------|---------|
| cg11026867 | 12 | 6,473,643   | 4.3E-05  | -0.232 | -0.247 |          |        |     | <i>SCNN1A</i>    | Body    |
| cg06612122 | 16 | 59,788,951  | 0.018474 | -0.232 | -0.197 |          |        |     | <i>LOC644649</i> | Body    |
| cg12629586 | 10 | 50,122,337  | 0.04818  | -0.232 | -0.120 |          |        |     | <i>WDFY4</i>     | Body    |
| cg06867285 | 7  | 79,642,961  | 0.00609  | -0.232 | -0.208 |          |        |     |                  |         |
| cg07875692 | 12 | 64,173,139  | 2.11E-10 | -0.232 | -0.207 |          |        |     | <i>TMEM5</i>     | TSS1500 |
| cg04232098 | 3  | 112,607,776 | 0.020121 | -0.232 | -0.149 |          |        |     |                  |         |
| cg16900102 | 7  | 98,283,412  | 0.011912 | -0.232 | -0.183 |          |        |     |                  |         |
| cg04969878 | 12 | 72,079,240  | 1.84E-08 | -0.232 | -0.225 | 5.41E-10 | -0.092 |     | <i>TMEM19</i>    | TSS1500 |
| cg14993663 | 8  | 63,055,928  | 0.044861 | -0.232 | -0.188 |          |        |     |                  |         |
| cg22356268 | 19 | 58,693,616  | 7.22E-05 | -0.232 | -0.228 |          |        |     | <i>ZNF274</i>    | TSS1500 |
| cg06706813 | 3  | 194,826,411 | 0.010549 | -0.232 | -0.258 |          |        |     | <i>C3orf21</i>   | Body    |
| cg13460934 | 1  | 3,003,690   | 0.02155  | -0.232 | -0.077 |          |        |     | <i>PRDM16</i>    | Body    |
| cg25434272 | 10 | 117,697,078 | 2.15E-06 | -0.232 | -0.196 |          |        |     | <i>ATRNL1</i>    | Body    |
| cg23676880 | 19 | 23,082,052  | 0.034838 | -0.232 | -0.159 |          |        | Yes |                  |         |
| cg26388177 | 11 | 1,889,547   | 0.013894 | -0.232 | -0.099 |          |        |     | <i>LSP1</i>      | TSS1500 |
| cg03498091 | 14 | 28,399,440  | 0.006203 | -0.232 | -0.162 |          |        |     |                  |         |
| cg10923855 | 12 | 34,488,830  | 1.53E-05 | -0.232 | -0.229 |          |        |     |                  |         |
| cg11760500 | 11 | 128,385,880 | 1.4E-12  | -0.232 | -0.248 |          |        |     | <i>ETS1</i>      | Body    |
| cg01306183 | 11 | 63,057,478  | 0.000124 | -0.232 | -0.228 |          |        |     | <i>SLC22A10</i>  | 5'UTR   |
| cg02723558 | 11 | 27,536,073  | 5.82E-05 | -0.232 | -0.211 |          |        |     | <i>BDNFOS</i>    | Body    |
| cg08355317 | X  | 100,642,128 | 0.001749 | -0.232 | -0.159 |          |        |     | <i>BTK</i>       | TSS1500 |
| cg16009120 | 12 | 8,686,707   | 0.013    | -0.232 | -0.190 |          |        |     | <i>CLEC4E</i>    | 3'UTR   |
| cg17742051 | 19 | 13,321,231  | 0.001953 | -0.232 | -0.090 |          |        |     | <i>CACNA1A</i>   | Body    |
| cg08825075 | 16 | 3,934,709   | 0.000348 | -0.232 | -0.149 |          |        |     |                  |         |
| cg19749001 | 2  | 11,681,405  | 0.005323 | -0.232 | -0.141 |          |        |     | <i>GREB1</i>     | TSS1500 |
| cg21017775 | 11 | 34,535,481  | 0.038994 | -0.232 | -0.275 |          |        |     | <i>ELF5</i>      | TSS200  |
| cg14425054 | 9  | 136,860,187 | 2.9E-13  | -0.232 | -0.220 |          |        |     |                  |         |
| cg14642773 | 18 | 75,888,474  | 0.004575 | -0.232 | -0.131 |          |        |     |                  |         |
| cg11331191 | X  | 63,446,644  | 0.004266 | -0.232 | -0.221 |          |        |     | <i>ASB12</i>     | TSS1500 |
| cg16933762 | 3  | 77,147,109  | 0.003941 | -0.232 | -0.216 |          |        |     | <i>ROBO2</i>     | TSS200  |
| cg02066184 | 7  | 16,841,504  | 0.006748 | -0.232 | -0.281 |          |        |     | <i>AGR2</i>      | 5'UTR   |
| cg03948902 | 1  | 170,669,166 | 0.021502 | -0.232 | -0.150 |          |        |     | <i>PRRX1</i>     | Body    |
| cg11408632 | 1  | 4,856,487   | 0.025812 | -0.232 | -0.124 |          |        |     |                  |         |
| cg22825220 | 15 | 54,582,445  | 0.001782 | -0.232 | -0.260 |          |        |     | <i>UNC13C</i>    | Body    |

|            |    |             |          |        |        |            |        |  |                  |         |
|------------|----|-------------|----------|--------|--------|------------|--------|--|------------------|---------|
| cg12942155 | 3  | 35,721,284  | 0.019297 | -0.232 | -0.150 |            |        |  | <i>ARPP-21</i>   | 5'UTR   |
| cg15397577 | 22 | 39,910,060  | 4.64E-05 | -0.232 | -0.190 |            |        |  | <i>SMCR7L</i>    | Body    |
| cg07426101 | 11 | 59,841,011  | 0.001608 | -0.232 | -0.169 |            |        |  |                  |         |
| cg24016995 | 10 | 129,868,149 | 7.05E-07 | -0.232 | -0.169 |            |        |  | <i>PTPRE</i>     | Body    |
| cg15853771 | 2  | 52,656,979  | 0.000149 | -0.232 | -0.239 |            |        |  |                  |         |
| cg16215361 | 11 | 26,594,620  | 1.1E-05  | -0.232 | -0.221 | 0.00061542 | -0.063 |  | <i>MUC15</i>     | TSS1500 |
| cg17393458 | 5  | 176,982,009 | 4.71E-11 | -0.232 | -0.215 |            |        |  | <i>FAM193B</i>   | TSS1500 |
| cg25071869 | 8  | 21,867,345  | 0.001504 | -0.232 | -0.149 |            |        |  |                  |         |
| cg05233614 | 12 | 131,142,966 | 0.004946 | -0.232 | -0.173 |            |        |  |                  |         |
| cg17079556 | 7  | 57,252,146  | 0.000404 | -0.232 | -0.175 |            |        |  |                  |         |
| cg18461347 | 7  | 78,947,094  | 3.09E-06 | -0.232 | -0.240 |            |        |  | <i>MAGI2</i>     | Body    |
| cg06182261 | 20 | 5,451,661   | 0.001637 | -0.232 | -0.178 |            |        |  | <i>LOC643406</i> | TSS200  |
| cg13824815 | 11 | 124,527,240 | 1.29E-06 | -0.232 | -0.180 |            |        |  | <i>SIAE</i>      | Body    |
| cg14251216 | 13 | 76,445,065  | 5.54E-06 | -0.232 | -0.169 |            |        |  |                  |         |
| cg22262095 | 19 | 8,669,981   | 0.001146 | -0.232 | -0.130 |            |        |  | <i>ADAMTS10</i>  | Body    |
| cg23613317 | 5  | 154,092,109 | 9.08E-06 | -0.232 | -0.222 |            |        |  | <i>LARP1</i>     | TSS1500 |
| cg15638170 | 20 | 44,261,252  | 0.015554 | -0.232 | -0.165 |            |        |  | <i>WFDC9</i>     | TSS1500 |
| cg01992512 | 21 | 46,493,156  | 0.006103 | -0.232 | -0.155 |            |        |  | <i>ADARB1</i>    | TSS1500 |
| cg16921285 | 13 | 104,003,206 | 0.046685 | -0.232 | -0.177 |            |        |  |                  |         |
| cg18758233 | 13 | 102,374,627 | 0.002733 | -0.232 | -0.134 |            |        |  | <i>FGF14</i>     | 3'UTR   |
| cg16451027 | 5  | 112,042,859 | 0.0001   | -0.232 | -0.268 |            |        |  | <i>APC</i>       | TSS1500 |
| cg03548035 | 11 | 86,663,407  | 7.78E-09 | -0.232 | -0.188 |            |        |  | <i>FZD4</i>      | Body    |
| cg16132208 | 13 | 76,536,939  | 0.00187  | -0.232 | -0.228 |            |        |  |                  |         |
| cg03621504 | 12 | 116,571,240 | 2.75E-10 | -0.232 | -0.223 |            |        |  | <i>MED13L</i>    | Body    |
| cg07787771 | 10 | 104,341,826 | 1.47E-05 | -0.232 | -0.224 |            |        |  | <i>SUFU</i>      | Body    |
| cg21911343 | 3  | 46,672,436  | 0.000203 | -0.232 | -0.214 |            |        |  |                  |         |
| cg20319457 | 2  | 20,133,404  | 4.06E-06 | -0.232 | -0.245 |            |        |  | <i>WDR35</i>     | Body    |
| cg09641127 | 2  | 10,193,895  | 0.009492 | -0.232 | -0.182 |            |        |  | <i>KLF11</i>     | 3'UTR   |
| cg18196709 | 1  | 170,646,916 | 0.038691 | -0.232 | -0.139 |            |        |  | <i>PRRX1</i>     | Body    |
| cg18430645 | 7  | 63,491,149  | 0.00012  | -0.232 | -0.184 |            |        |  |                  |         |
| cg19178642 | 15 | 89,657,390  | 5.87E-05 | -0.232 | -0.194 |            |        |  | <i>ABHD2</i>     | 5'UTR   |
| cg25943719 | 15 | 101,421,391 | 1.92E-10 | -0.232 | -0.233 |            |        |  | <i>ALDH1A3</i>   | Body    |
| cg25049844 | 21 | 46,933,374  | 9.75E-10 | -0.232 | -0.231 |            |        |  | <i>COL18A1</i>   | 3'UTR   |
| cg23110514 | 1  | 152,538,888 | 0.00194  | -0.232 | -0.182 | 3.62E-09   | -0.176 |  | <i>LCE3E</i>     | 5'UTR   |

|            |    |             |          |        |        |          |        |  |                 |         |
|------------|----|-------------|----------|--------|--------|----------|--------|--|-----------------|---------|
| cg00190738 | 5  | 112,042,650 | 0.000649 | -0.232 | -0.285 |          |        |  | <i>APC</i>      | TSS1500 |
| cg07912766 | 18 | 45,458,698  | 7.35E-06 | -0.232 | -0.222 |          |        |  | <i>SMAD2</i>    | TSS1500 |
| cg14187242 | 9  | 117,673,469 | 2.42E-07 | -0.232 | -0.205 |          |        |  | <i>TNFSF8</i>   | Body    |
| cg13985485 | 1  | 239,550,283 | 5.77E-09 | -0.232 | -0.232 |          |        |  |                 |         |
| cg21041579 | 14 | 95,907,997  | 0.001208 | -0.232 | -0.155 |          |        |  | <i>C14orf49</i> | Body    |
| cg07184316 | 1  | 157,669,111 | 0.002696 | -0.232 | -0.241 |          |        |  | <i>FCRL3</i>    | Body    |
| cg02106180 | 16 | 845,767     | 2.29E-05 | -0.232 | -0.247 |          |        |  | <i>CHTF18</i>   | Body    |
| cg01731341 | 12 | 4,554,295   | 0.01266  | -0.232 | -0.119 | 1.03E-08 | -0.121 |  | <i>FGF6</i>     | Body    |
| cg01303032 | 10 | 25,940,372  | 0.005687 | -0.232 | -0.224 |          |        |  |                 |         |
| cg12756893 | 4  | 24,232,894  | 0.007891 | -0.232 | -0.182 |          |        |  |                 |         |
| cg14975238 | 7  | 97,841,591  | 0.011425 | -0.232 | -0.094 | 2.18E-18 | -0.125 |  | <i>BHLHA15</i>  | 1stExon |
| cg18794475 | 8  | 55,533,829  | 0.012219 | -0.232 | -0.105 |          |        |  | <i>RP1</i>      | Body    |
| cg04394529 | 11 | 2,067,849   | 0.018106 | -0.232 | -0.118 |          |        |  |                 |         |
| cg09374437 | 19 | 52,769,790  | 3.56E-06 | -0.232 | -0.191 |          |        |  |                 |         |
| cg24403338 | 20 | 31,366,437  | 0.000883 | -0.232 | -0.169 |          |        |  | <i>DNMT3B</i>   | 5'UTR   |
| cg01279413 | 20 | 62,030,494  | 2.14E-10 | -0.232 | -0.231 |          |        |  |                 |         |
| cg10938393 | 5  | 32,171,158  | 2.08E-08 | -0.233 | -0.223 |          |        |  | <i>GOLPH3</i>   | Body    |
| cg14492302 | 17 | 21,911,362  | 0.038336 | -0.233 | -0.117 |          |        |  | <i>FLJ36000</i> | Body    |
| cg23770008 | 12 | 34,453,757  | 0.046464 | -0.233 | -0.128 |          |        |  |                 |         |
| cg05089968 | 6  | 166,722,773 | 1.19E-07 | -0.233 | -0.209 | 1.11E-08 | -0.139 |  | <i>PRR18</i>    | TSS1500 |
| cg25580656 | 14 | 104,197,160 | 1.46E-05 | -0.233 | -0.206 |          |        |  | <i>ZFYVE21</i>  | Body    |
| cg01928231 | 6  | 3,502,698   | 1.87E-05 | -0.233 | -0.201 |          |        |  |                 |         |
| cg21027035 | 7  | 152,591,949 | 0.012775 | -0.233 | -0.129 |          |        |  |                 |         |
| cg25569300 | 14 | 97,538,227  | 0.017276 | -0.233 | -0.185 |          |        |  |                 |         |
| cg14863944 | 13 | 22,740,131  | 0.036151 | -0.233 | -0.209 |          |        |  |                 |         |
| cg08325307 | 7  | 31,557,142  | 0.027087 | -0.233 | -0.111 |          |        |  | <i>CCDC129</i>  | 1stExon |
| cg24253136 | 11 | 34,535,140  | 0.02431  | -0.233 | -0.259 |          |        |  | <i>ELF5</i>     | 5'UTR   |
| cg24681125 | 2  | 154,725,150 | 0.002118 | -0.233 | -0.155 |          |        |  |                 |         |
| cg02260630 | 16 | 75,491,894  | 9.05E-08 | -0.233 | -0.218 |          |        |  | <i>TMEM170A</i> | Body    |
| cg17929238 | 4  | 111,545,628 | 7.33E-05 | -0.233 | -0.113 |          |        |  | <i>PITX2</i>    | TSS1500 |
| cg17819250 | 8  | 36,380,237  | 4.13E-06 | -0.233 | -0.244 |          |        |  |                 |         |
| cg17908564 | 3  | 89,294,826  | 0.002469 | -0.233 | -0.197 |          |        |  | <i>EPHA3</i>    | Body    |
| cg19224278 | 15 | 101,419,017 | 0.004902 | -0.233 | -0.174 | 6.91E-12 | -0.197 |  | <i>ALDH1A3</i>  | TSS1500 |
| cg03976856 | 1  | 2,764,669   | 1.23E-12 | -0.233 | -0.213 |          |        |  |                 |         |

|            |    |             |          |        |        |          |        |  |                  |         |
|------------|----|-------------|----------|--------|--------|----------|--------|--|------------------|---------|
| cg07241084 | 7  | 47,493,388  | 0.004042 | -0.233 | -0.201 |          |        |  | <i>TNS3</i>      | 5'UTR   |
| cg01518591 | 6  | 29,408,229  | 0.008312 | -0.233 | -0.220 |          |        |  | <i>OR10C1</i>    | 1stExon |
| cg09947274 | 2  | 27,439,915  | 2.44E-05 | -0.233 | -0.200 | 1.07E-08 | -0.078 |  | <i>C2orf28</i>   | 3'UTR   |
| cg20742415 | 1  | 170,114,481 | 0.026056 | -0.233 | -0.070 |          |        |  | <i>METTL11B</i>  | TSS1500 |
| cg06050193 | 16 | 87,101,721  | 0.027569 | -0.233 | -0.127 |          |        |  |                  |         |
| cg08077807 | 14 | 62,001,072  | 0.002749 | -0.233 | -0.139 |          |        |  | <i>PRKCH</i>     | Body    |
| cg03310930 | 10 | 109,677,537 | 0.046069 | -0.233 | -0.176 |          |        |  |                  |         |
| cg07856280 | 8  | 48,038,289  | 0.006376 | -0.233 | -0.198 |          |        |  |                  |         |
| cg23903244 | 11 | 2,812,987   | 0.007749 | -0.233 | -0.275 |          |        |  | <i>KCNQ1</i>     | Body    |
| cg03312565 | 1  | 4,577,365   | 0.008858 | -0.233 | -0.179 |          |        |  |                  |         |
| cg11915309 | 10 | 50,123,344  | 0.026026 | -0.233 | -0.093 |          |        |  | <i>LRRC18</i>    | TSS1500 |
| cg15698945 | 6  | 132,858,597 | 0.005289 | -0.233 | -0.162 |          |        |  | <i>TAAR9</i>     | TSS1500 |
| cg04774930 | 16 | 23,768,982  | 0.034538 | -0.233 | -0.182 |          |        |  | <i>CHP2</i>      | 3'UTR   |
| cg15230164 | 8  | 89,747,827  | 0.005331 | -0.233 | -0.162 |          |        |  |                  |         |
| cg05463326 | 8  | 133,118,481 | 0.038335 | -0.233 | -0.199 |          |        |  | <i>HHLA1</i>     | TSS1500 |
| cg01747862 | 4  | 174,457,371 | 1.53E-07 | -0.233 | -0.239 |          |        |  | <i>NBLA00301</i> | Body    |
| cg18537464 | 18 | 76,345,144  | 0.028202 | -0.233 | -0.126 |          |        |  |                  |         |
| cg27020161 | 10 | 108,318,417 | 1.34E-07 | -0.233 | -0.212 |          |        |  |                  |         |
| cg16002378 | 14 | 105,036,533 | 0.01236  | -0.233 | -0.141 |          |        |  |                  |         |
| cg02490034 | 7  | 130,125,836 | 7.7E-05  | -0.233 | -0.243 |          |        |  | <i>MEST</i>      | TSS1500 |
| cg11999580 | 8  | 118,383,430 | 0.001218 | -0.233 | -0.178 |          |        |  |                  |         |
| cg21901160 | 13 | 48,046,005  | 0.004116 | -0.233 | -0.195 |          |        |  |                  |         |
| cg00491207 | 18 | 76,270,362  | 0.000282 | -0.233 | -0.137 |          |        |  |                  |         |
| cg05046020 | 1  | 158,148,523 | 0.012992 | -0.233 | -0.241 |          |        |  | <i>CD1D</i>      | TSS1500 |
| cg08134681 | 2  | 88,742,592  | 0.022687 | -0.233 | -0.129 |          |        |  |                  |         |
| cg04291383 | 1  | 12,787,380  | 0.009201 | -0.233 | -0.193 |          |        |  | <i>AADA3L3</i>   | 3'UTR   |
| cg07973026 | 4  | 103,553,119 | 0.00958  | -0.233 | -0.218 |          |        |  | <i>MANBA</i>     | 3'UTR   |
| cg18123581 | 8  | 90,772,386  | 1.25E-07 | -0.233 | -0.253 |          |        |  | <i>RIPK2</i>     | Body    |
| cg26800525 | 13 | 113,411,519 | 7.78E-05 | -0.233 | -0.238 |          |        |  | <i>ATP11A</i>    | Body    |
| cg14216734 | 1  | 158,817,808 | 0.000285 | -0.233 | -0.274 |          |        |  | <i>MNDA</i>      | Body    |
| cg15444735 | 13 | 56,140,478  | 0.001987 | -0.233 | -0.158 |          |        |  |                  |         |
| cg13635184 | 7  | 148,903,126 | 1.93E-06 | -0.233 | -0.234 |          |        |  | <i>ZNF282</i>    | Body    |
| cg22793142 | 1  | 207,995,752 | 1.2E-07  | -0.233 | -0.211 |          |        |  | <i>LOC148696</i> | Body    |
| cg25762854 | 8  | 80,048,524  | 0.008216 | -0.233 | -0.182 |          |        |  |                  |         |



|            |    |             |          |        |        |           |        |  |                  |         |
|------------|----|-------------|----------|--------|--------|-----------|--------|--|------------------|---------|
| cg09869595 | 1  | 48,703,725  | 1.88E-09 | -0.233 | -0.230 |           |        |  | <i>SLC5A9</i>    | Body    |
| cg11759354 | 6  | 32,946,541  | 0.000586 | -0.233 | -0.303 |           |        |  | <i>BRD2</i>      | Body    |
| cg09250365 | 11 | 92,080,444  | 1.45E-12 | -0.233 | -0.238 |           |        |  |                  |         |
| cg15623444 | 4  | 103,867,628 | 0.003565 | -0.233 | -0.219 |           |        |  | <i>NHEDC1</i>    | Body    |
| cg17546376 | 3  | 42,172,097  | 8.95E-06 | -0.233 | -0.228 |           |        |  | <i>TRAK1</i>     | Body    |
| cg09599971 | 16 | 7,615,516   | 0.00134  | -0.233 | -0.174 |           |        |  | <i>A2BP1</i>     | Body    |
| cg06580419 | 2  | 215,276,156 | 8.01E-08 | -0.233 | -0.207 |           |        |  | <i>VWC2L</i>     | TSS1500 |
| cg17073708 | 8  | 55,374,489  | 0.006985 | -0.233 | -0.169 |           |        |  |                  |         |
| cg21196708 | 8  | 118,357,170 | 0.002264 | -0.233 | -0.205 |           |        |  |                  |         |
| cg26370066 | 19 | 7,685,601   | 0.009432 | -0.233 | -0.130 |           |        |  | <i>XAB2</i>      | Body    |
| cg04604142 | 17 | 48,796,515  | 0.000898 | -0.233 | -0.204 |           |        |  | <i>LUC7L3</i>    | TSS1500 |
| cg06995408 | 2  | 48,977,089  | 9.73E-06 | -0.233 | -0.218 |           |        |  | <i>LHCGR</i>     | Body    |
| cg12598937 | 10 | 10,987,228  | 0.048757 | -0.233 | -0.142 |           |        |  | <i>LOC254312</i> | Body    |
| cg19404207 | 7  | 99,587,136  | 1.67E-07 | -0.233 | -0.224 |           |        |  |                  |         |
| cg03660010 | 4  | 48,342,263  | 2.73E-08 | -0.233 | -0.243 |           |        |  | <i>SLAIN2</i>    | TSS1500 |
| cg23069297 | 2  | 242,833,648 | 9.46E-05 | -0.233 | -0.227 |           |        |  |                  |         |
| cg11645465 | 8  | 55,243,181  | 0.006059 | -0.233 | -0.156 |           |        |  |                  |         |
| cg15489693 | 4  | 10,498,037  | 1.34E-11 | -0.233 | -0.220 |           |        |  | <i>CLNK</i>      | Body    |
| cg27652350 | 15 | 101,420,989 | 8.08E-11 | -0.233 | -0.229 | 1E-12     | -0.168 |  | <i>ALDH1A3</i>   | Body    |
| cg10883352 | 3  | 142,895,375 | 9.08E-05 | -0.233 | -0.178 | 0.0002182 | -0.089 |  |                  |         |
| cg03886699 | 1  | 212,698,918 | 0.026348 | -0.233 | -0.041 |           |        |  |                  |         |
| cg03539903 | 20 | 53,088,317  | 0.004241 | -0.233 | -0.170 |           |        |  |                  |         |
| cg09455887 | 16 | 11,629,183  | 0.010775 | -0.233 | -0.185 |           |        |  |                  |         |
| cg24595152 | 3  | 43,733,831  | 7.1E-08  | -0.233 | -0.192 |           |        |  | <i>ABHD5</i>     | Body    |
| cg06646682 | 1  | 1,273,442   | 0.020351 | -0.233 | -0.220 |           |        |  | <i>DVL1</i>      | Body    |
| cg10237442 | 22 | 31,475,122  | 0.000334 | -0.233 | -0.225 |           |        |  |                  |         |
| cg08412936 | 6  | 31,097,051  | 0.000113 | -0.233 | -0.197 |           |        |  | <i>PSORS1C1</i>  | 5'UTR   |
| cg15698171 | 20 | 62,795,464  | 0.007371 | -0.233 | -0.217 |           |        |  | <i>MYT1</i>      | TSS1500 |
| cg19112204 | 11 | 35,425,551  | 6.57E-07 | -0.233 | -0.225 |           |        |  | <i>SLC1A2</i>    | Body    |
| cg14219115 | 9  | 115,707,123 | 0.006065 | -0.233 | -0.230 |           |        |  |                  |         |
| cg13561518 | 14 | 22,336,334  | 0.008295 | -0.233 | -0.244 |           |        |  |                  |         |
| cg18329797 | 4  | 173,585,926 | 0.029975 | -0.233 | -0.175 |           |        |  | <i>GALNTL6</i>   | Body    |
| cg23319289 | 14 | 82,292,196  | 0.000168 | -0.233 | -0.222 |           |        |  |                  |         |
| cg04049033 | 17 | 1,553,661   | 0.001262 | -0.233 | -0.158 | 3.61E-12  | -0.102 |  | <i>RILP</i>      | TSS1500 |

|            |    |             |          |        |        |          |        |  |                 |         |
|------------|----|-------------|----------|--------|--------|----------|--------|--|-----------------|---------|
| cg04840339 | 6  | 123,957,958 | 0.024657 | -0.233 | -0.148 |          |        |  | <i>TRDN</i>     | TSS200  |
| cg21181162 | 8  | 72,650,106  | 0.006435 | -0.234 | -0.265 |          |        |  |                 |         |
| cg12496800 | 10 | 72,648,987  | 1.7E-07  | -0.234 | -0.231 |          |        |  | <i>PCBD1</i>    | TSS1500 |
| cg16149943 | 21 | 46,932,082  | 9.78E-05 | -0.234 | -0.212 |          |        |  | <i>COL18A1</i>  | Body    |
| cg00731958 | 7  | 48,081,031  | 0.042751 | -0.234 | -0.164 |          |        |  | <i>C7orf57</i>  | Body    |
| cg00096106 | 5  | 100,176,809 | 3.81E-05 | -0.234 | -0.242 |          |        |  | <i>ST8SIA4</i>  | Body    |
| cg18071162 | 5  | 25,909,453  | 0.000792 | -0.234 | -0.159 |          |        |  |                 |         |
| cg04170440 | 6  | 154,410,350 | 9.87E-06 | -0.234 | -0.174 |          |        |  | <i>OPRM1</i>    | Body    |
| cg24839529 | 4  | 185,668,393 | 3.24E-09 | -0.234 | -0.242 |          |        |  |                 |         |
| cg08853572 | 16 | 1,843,915   | 0.000156 | -0.234 | -0.197 |          |        |  | <i>IGFALS</i>   | TSS200  |
| cg20127899 | 8  | 32,579,253  | 2.55E-07 | -0.234 | -0.198 |          |        |  | <i>NRG1</i>     | Body    |
| cg21268144 | 12 | 34,531,722  | 4.07E-09 | -0.234 | -0.216 |          |        |  |                 |         |
| cg08886154 | 7  | 127,256,676 | 8.17E-05 | -0.234 | -0.174 | 3.06E-16 | -0.171 |  | <i>PAX4</i>     | TSS1500 |
| cg22338152 | 19 | 57,642,143  | 0.004191 | -0.234 | -0.240 |          |        |  | <i>USP29</i>    | Body    |
| cg05933815 | 16 | 22,012,743  | 1.59E-05 | -0.234 | -0.195 |          |        |  | <i>C16orf65</i> | TSS1500 |
| cg06582512 | 12 | 47,629,311  | 2.25E-11 | -0.234 | -0.209 |          |        |  | <i>FAM113B</i>  | Body    |
| cg02109704 | 5  | 1,721,452   | 2.37E-05 | -0.234 | -0.197 |          |        |  |                 |         |
| cg13488501 | 1  | 46,805,584  | 0.000643 | -0.234 | -0.302 |          |        |  | <i>NSUN4</i>    | TSS1500 |
| cg26891645 | 1  | 12,908,204  | 0.02163  | -0.234 | -0.142 |          |        |  | <i>HNRNPCL1</i> | 5'UTR   |
| cg15238224 | 6  | 30,081,408  | 0.000503 | -0.234 | -0.180 | 2.95E-13 | -0.179 |  | <i>TRIM31</i>   | TSS1500 |
| cg15697852 | 5  | 140,098,576 | 0.035359 | -0.234 | -0.187 |          |        |  | <i>VTRNA1-2</i> | Body    |
| cg01845764 | 11 | 127,112,911 | 8.72E-05 | -0.234 | -0.244 |          |        |  |                 |         |
| cg09288312 | 10 | 134,830,961 | 0.0056   | -0.234 | -0.127 |          |        |  |                 |         |
| cg23620049 | 3  | 185,270,558 | 2.71E-10 | -0.234 | -0.210 |          |        |  | <i>LIPH</i>     | TSS200  |
| cg21166380 | 13 | 39,565,478  | 0.001991 | -0.234 | -0.195 |          |        |  | <i>STOML3</i>   | TSS1500 |
| cg22183373 | 4  | 24,806,777  | 6.62E-05 | -0.234 | -0.224 |          |        |  |                 |         |
| cg10664754 | 9  | 139,939,662 | 9.63E-10 | -0.234 | -0.240 |          |        |  | <i>NPDC1</i>    | Body    |
| cg03996020 | 7  | 157,180,124 | 8.04E-05 | -0.234 | -0.152 |          |        |  | <i>DNAJB6</i>   | Body    |
| cg22255095 | 20 | 60,472,331  | 0.00186  | -0.234 | -0.142 |          |        |  | <i>CDH4</i>     | Body    |
| cg05658922 | 16 | 86,743,763  | 0.023032 | -0.234 | -0.098 |          |        |  |                 |         |
| cg08415557 | 19 | 9,226,505   | 0.002469 | -0.234 | -0.123 |          |        |  | <i>OR7G1</i>    | TSS200  |
| cg15486846 | 15 | 24,509,693  | 1.92E-05 | -0.234 | -0.224 |          |        |  |                 |         |
| cg25839267 | 3  | 77,091,645  | 0.009783 | -0.234 | -0.204 |          |        |  | <i>ROBO2</i>    | Body    |
| cg09221035 | 1  | 3,059,517   | 0.006144 | -0.234 | -0.067 |          |        |  | <i>PRDM16</i>   | Body    |

|            |    |             |          |        |        |  |  |  |                 |         |
|------------|----|-------------|----------|--------|--------|--|--|--|-----------------|---------|
| cg26562691 | 16 | 23,850,404  | 0.018549 | -0.234 | -0.240 |  |  |  | <i>PRKCB</i>    | Body    |
| cg18826076 | 7  | 48,108,684  | 0.016263 | -0.234 | -0.179 |  |  |  |                 |         |
| cg05647431 | 2  | 241,971,306 | 0.001434 | -0.234 | -0.230 |  |  |  | <i>SNED1</i>    | Body    |
| cg10622126 | X  | 147,598,391 | 0.032382 | -0.234 | -0.151 |  |  |  | <i>AFF2</i>     | Body    |
| cg03848588 | 9  | 32,525,008  | 4.73E-06 | -0.234 | -0.219 |  |  |  | <i>DDX58</i>    | Body    |
| cg00554260 | 2  | 59,494,314  | 0.001128 | -0.234 | -0.176 |  |  |  |                 |         |
| cg03854077 | 4  | 189,580,596 | 0.004323 | -0.234 | -0.185 |  |  |  |                 |         |
| cg17001868 | 7  | 63,247,871  | 0.008943 | -0.234 | -0.189 |  |  |  |                 |         |
| cg09319695 | 6  | 13,976,724  | 7.21E-07 | -0.234 | -0.193 |  |  |  | <i>RNF182</i>   | 5'UTR   |
| cg11789371 | 14 | 102,551,385 | 7.25E-05 | -0.234 | -0.165 |  |  |  | <i>HSP90AA1</i> | Body    |
| cg06174454 | 3  | 50,371,818  | 2.12E-07 | -0.234 | -0.224 |  |  |  | <i>RASSF1</i>   | Body    |
| cg20082618 | 18 | 19,318,496  | 2.07E-06 | -0.234 | -0.203 |  |  |  |                 |         |
| cg00337703 | 10 | 115,938,729 | 6.09E-14 | -0.234 | -0.248 |  |  |  | <i>TDRD1</i>    | TSS1500 |
| cg07459248 | 17 | 77,194,008  | 0.006153 | -0.234 | -0.142 |  |  |  | <i>HRNBP3</i>   | 5'UTR   |
| cg04790749 | 17 | 34,123,272  | 1.13E-09 | -0.234 | -0.224 |  |  |  | <i>MMP28</i>    | TSS1500 |
| cg07342258 | 5  | 2,866,851   | 0.011405 | -0.234 | -0.120 |  |  |  |                 |         |
| cg19417526 | 11 | 131,895,599 | 0.019015 | -0.234 | -0.291 |  |  |  | <i>NTM</i>      | Body    |
| cg06641537 | 7  | 142,020,422 | 0.013765 | -0.234 | -0.271 |  |  |  |                 |         |
| cg00394718 | 8  | 120,684,921 | 0.000177 | -0.234 | -0.212 |  |  |  |                 |         |
| cg16559630 | 7  | 56,301,065  | 0.000158 | -0.234 | -0.220 |  |  |  |                 |         |
| cg14072016 | 10 | 384,652     | 0.032028 | -0.234 | -0.207 |  |  |  | <i>DIP2C</i>    | Body    |
| cg12437821 | 12 | 114,852,027 | 0.001075 | -0.234 | -0.193 |  |  |  |                 |         |
| cg06223834 | 16 | 4,103,161   | 0.003974 | -0.234 | -0.297 |  |  |  | <i>ADCY9</i>    | Body    |
| cg15061827 | 1  | 4,015,423   | 7.85E-05 | -0.234 | -0.263 |  |  |  |                 |         |
| cg20207276 | 8  | 23,428,718  | 3.52E-07 | -0.234 | -0.208 |  |  |  | <i>SLC25A37</i> | Body    |
| cg17070005 | 8  | 13,395,492  | 0.000988 | -0.234 | -0.199 |  |  |  |                 |         |
| cg12914733 | 11 | 955,328     | 1.62E-05 | -0.234 | -0.266 |  |  |  | <i>AP2A2</i>    | Body    |
| cg20594465 | 13 | 58,246,705  | 0.00186  | -0.234 | -0.179 |  |  |  | <i>PCDH17</i>   | Body    |
| cg02578929 | 2  | 61,414,329  | 1.57E-05 | -0.234 | -0.205 |  |  |  | <i>AHSA2</i>    | 3'UTR   |
| cg05074133 | 4  | 16,686,903  | 0.010957 | -0.234 | -0.231 |  |  |  | <i>LDB2</i>     | Body    |
| cg14227762 | 14 | 106,053,344 | 0.001388 | -0.234 | -0.107 |  |  |  |                 |         |
| cg04880751 | 1  | 241,695,164 | 6.83E-08 | -0.234 | -0.229 |  |  |  | <i>KMO</i>      | TSS1500 |
| cg07283630 | 15 | 48,667,436  | 0.017373 | -0.234 | -0.201 |  |  |  |                 |         |
| cg23326129 | 8  | 46,951,404  | 0.013245 | -0.234 | -0.189 |  |  |  |                 |         |

|            |    |             |          |        |        |          |        |     |                 |         |
|------------|----|-------------|----------|--------|--------|----------|--------|-----|-----------------|---------|
| cg05230854 | 8  | 8,162,989   | 4.05E-05 | -0.234 | -0.267 |          |        |     |                 |         |
| cg22916646 | 5  | 162,672,583 | 0.0345   | -0.234 | -0.108 |          |        |     |                 |         |
| cg03367622 | 7  | 144,967,385 | 0.003551 | -0.234 | -0.231 |          |        |     |                 |         |
| cg04574507 | 1  | 158,301,038 | 0.032951 | -0.234 | -0.151 | 2.91E-15 | -0.188 |     | <i>CD1B</i>     | Body    |
| cg08470264 | 16 | 86,580,384  | 2.89E-06 | -0.234 | -0.207 |          |        |     | <i>MTHFSD</i>   | Body    |
| cg11853970 | 1  | 986,037     | 6.46E-05 | -0.234 | -0.192 |          |        |     | <i>AGRN</i>     | Body    |
| cg27480913 | 11 | 6,008,246   | 0.002096 | -0.234 | -0.235 |          |        |     | <i>OR52L1</i>   | TSS200  |
| cg01233025 | 11 | 55,637,839  | 1.65E-07 | -0.234 | -0.227 |          |        |     |                 |         |
| cg20723705 | 11 | 122,118,676 | 0.009935 | -0.234 | -0.156 |          |        |     |                 |         |
| cg18221016 | 1  | 185,934,251 | 4.83E-08 | -0.234 | -0.239 |          |        |     | <i>HMCN1</i>    | Body    |
| cg20624941 | 12 | 125,811,144 | 0.006155 | -0.234 | -0.256 |          |        |     | <i>TMEM132B</i> | TSS200  |
| cg04105230 | 15 | 101,938,681 | 2.72E-07 | -0.234 | -0.226 |          |        |     | <i>PCSK6</i>    | Body    |
| cg13697223 | 4  | 173,710,219 | 0.035232 | -0.234 | -0.125 |          |        |     | <i>GALNTL6</i>  | Body    |
| cg23246095 | 2  | 162,931,638 | 4.44E-08 | -0.234 | -0.211 |          |        |     | <i>DPP4</i>     | TSS1500 |
| cg23316648 | 4  | 17,096,664  | 0.001341 | -0.234 | -0.210 |          |        |     |                 |         |
| cg05331856 | 13 | 40,516,584  | 5.88E-08 | -0.235 | -0.254 |          |        |     |                 |         |
| cg16521643 | 16 | 32,452,502  | 0.029216 | -0.235 | -0.140 |          |        |     |                 |         |
| cg13496790 | 3  | 66,455,738  | 0.015048 | -0.235 | -0.255 |          |        |     | <i>LRIG1</i>    | Body    |
| cg03124880 | 12 | 108,617,533 | 0.024569 | -0.235 | -0.153 |          |        | Yes | <i>WSCD2</i>    | Body    |
| cg21966319 | 4  | 169,543,126 | 1.04E-05 | -0.235 | -0.195 |          |        |     | <i>PALLD</i>    | Body    |
| cg05038881 | 1  | 10,490,043  | 1.36E-14 | -0.235 | -0.223 |          |        |     | <i>APITD1</i>   | TSS200  |
| cg13439703 | 9  | 20,566,875  | 0.00015  | -0.235 | -0.208 |          |        |     | <i>MLLT3</i>    | Body    |
| cg20387172 | 8  | 145,689,754 | 1.02E-07 | -0.235 | -0.198 |          |        |     | <i>CYHR1</i>    | Body    |
| cg10149533 | 4  | 154,064,784 | 7.48E-08 | -0.235 | -0.236 |          |        |     |                 |         |
| cg12612406 | 6  | 30,103,459  | 0.000849 | -0.235 | -0.150 |          |        |     | <i>TRIM40</i>   | TSS1500 |
| cg10842913 | 12 | 125,755,229 | 0.018463 | -0.235 | -0.253 |          |        |     |                 |         |
| cg15061682 | 13 | 102,850,387 | 0.021268 | -0.235 | -0.166 |          |        |     | <i>FGF14</i>    | Body    |
| cg26919735 | 1  | 152,647,793 | 0.018754 | -0.235 | -0.160 |          |        |     | <i>LCE2C</i>    | 1stExon |
| cg03344806 | 7  | 18,067,282  | 0.038075 | -0.235 | -0.113 |          |        |     | <i>PRPS1L1</i>  | 1stExon |
| cg03461296 | 20 | 60,637,948  | 1.52E-05 | -0.235 | -0.299 |          |        |     | <i>TAF4</i>     | Body    |
| cg07280272 | 15 | 41,230,536  | 1.77E-39 | -0.235 | -0.227 |          |        |     | <i>DLL4</i>     | 3'UTR   |
| cg05565809 | 6  | 31,740,787  | 1.32E-07 | -0.235 | -0.197 |          |        |     | <i>C6orf27</i>  | Body    |
| cg07369399 | 16 | 50,772,296  | 0.001408 | -0.235 | -0.107 |          |        |     |                 |         |
| cg08449144 | 11 | 1,857,919   | 7.72E-06 | -0.235 | -0.196 |          |        |     | <i>SYT8</i>     | Body    |

|            |    |             |          |        |        |  |  |     |                |         |
|------------|----|-------------|----------|--------|--------|--|--|-----|----------------|---------|
| cg12968800 | 2  | 108,565,893 | 0.002137 | -0.235 | -0.141 |  |  |     |                |         |
| cg01022345 | 14 | 101,317,819 | 0.000138 | -0.235 | -0.127 |  |  |     | <i>MIR770</i>  | TSS1500 |
| cg23982574 | 12 | 132,174,431 | 0.000278 | -0.235 | -0.176 |  |  |     |                |         |
| cg24853313 | X  | 145,078,200 | 0.014596 | -0.235 | -0.160 |  |  |     | <i>MIR892A</i> | Body    |
| cg27562311 | 12 | 8,766,941   | 0.038589 | -0.235 | -0.131 |  |  |     | <i>AICDA</i>   | TSS1500 |
| cg14469928 | 2  | 125,733,618 | 0.000601 | -0.235 | -0.238 |  |  |     |                |         |
| cg26909217 | 16 | 72,974,588  | 1.62E-05 | -0.235 | -0.225 |  |  | Yes | <i>ZFH3</i>    | Body    |
| cg05855347 | 7  | 129,773,086 | 0.00048  | -0.235 | -0.156 |  |  |     | <i>KLHDC10</i> | 3'UTR   |
| cg25786780 | 19 | 12,957,979  | 1.58E-07 | -0.235 | -0.183 |  |  |     | <i>MAST1</i>   | Body    |
| cg01231009 | 8  | 130,641,185 | 0.011552 | -0.235 | -0.231 |  |  |     |                |         |
| cg00517080 | 11 | 134,098,583 | 3.35E-05 | -0.235 | -0.145 |  |  |     | <i>VPS26B</i>  | Body    |
| cg15810474 | Y  | 9,306,450   | 1.97E-06 | -0.235 | -0.202 |  |  |     | <i>TSPY1</i>   | Body    |
| cg04608582 | 1  | 113,798,121 | 1.56E-06 | -0.235 | -0.229 |  |  |     |                |         |
| cg07791803 | 8  | 34,343,944  | 0.002859 | -0.235 | -0.152 |  |  |     |                |         |
| cg05210558 | 11 | 131,410,879 | 0.005503 | -0.235 | -0.205 |  |  |     | <i>NTM</i>     | Body    |
| cg25753473 | 6  | 170,532,835 | 1.01E-10 | -0.235 | -0.222 |  |  |     |                |         |
| cg17667592 | 11 | 123,496,000 | 0.010244 | -0.235 | -0.174 |  |  |     |                |         |
| cg22103831 | 13 | 58,256,880  | 0.001458 | -0.235 | -0.157 |  |  | Yes | <i>PCDH17</i>  | Body    |
| cg18574499 | 21 | 40,669,669  | 2.14E-06 | -0.235 | -0.261 |  |  |     | <i>BRWD1</i>   | Body    |
| cg10465202 | 12 | 8,766,467   | 0.014932 | -0.235 | -0.160 |  |  |     | <i>AICDA</i>   | TSS1500 |
| cg01974330 | 1  | 196,177,626 | 0.02785  | -0.235 | -0.161 |  |  |     |                |         |
| cg03594972 | 5  | 3,659,656   | 0.018568 | -0.235 | -0.127 |  |  |     |                |         |
| cg08228600 | 11 | 120,911,604 | 5.02E-07 | -0.235 | -0.262 |  |  |     | <i>TBCEL</i>   | 5'UTR   |
| cg18176054 | 12 | 93,839,011  | 2.1E-08  | -0.235 | -0.236 |  |  |     |                |         |
| cg24703336 | 12 | 5,257,426   | 0.010224 | -0.235 | -0.160 |  |  |     |                |         |
| cg07891120 | 4  | 171,663,610 | 0.031316 | -0.235 | -0.207 |  |  |     |                |         |
| cg11538307 | 5  | 40,984,654  | 0.033564 | -0.235 | -0.213 |  |  |     |                |         |
| cg08085487 | X  | 145,110,794 | 0.003531 | -0.235 | -0.132 |  |  |     | <i>MIR891A</i> | TSS1500 |
| cg16842280 | 17 | 10,422,189  | 5.2E-10  | -0.235 | -0.213 |  |  |     | <i>MYH1</i>    | TSS1500 |
| cg09796270 | 17 | 17,721,594  | 0.035758 | -0.235 | -0.245 |  |  |     | <i>SREBF1</i>  | Body    |
| cg05545891 | 11 | 56,113,768  | 0.036757 | -0.235 | -0.124 |  |  |     | <i>OR8K1</i>   | 1stExon |
| cg17895446 | 4  | 173,573,053 | 0.036832 | -0.235 | -0.210 |  |  |     | <i>GALNTL6</i> | Body    |
| cg07436896 | 13 | 84,512,421  | 2.01E-05 | -0.235 | -0.218 |  |  |     |                |         |
| cg23219332 | X  | 134,971,334 | 0.000109 | -0.235 | -0.169 |  |  |     | <i>CT45A6</i>  | TSS200  |

|            |    |             |          |        |        |  |  |     |                  |         |
|------------|----|-------------|----------|--------|--------|--|--|-----|------------------|---------|
| cg02842704 | 5  | 151,305,746 | 1.29E-06 | -0.235 | -0.232 |  |  |     | <i>GLRA1</i>     | TSS1500 |
| cg04290171 | 1  | 207,924,482 | 1.4E-06  | -0.235 | -0.225 |  |  |     | <i>CD46</i>      | TSS1500 |
| cg11868247 | 7  | 7,962,810   | 6.3E-09  | -0.235 | -0.218 |  |  |     |                  |         |
| cg24055855 | 17 | 1,535,293   | 2.8E-05  | -0.235 | -0.227 |  |  |     |                  |         |
| cg24107750 | 10 | 6,569,373   | 0.007057 | -0.235 | -0.155 |  |  |     | <i>PRKCQ</i>     | 5'UTR   |
| cg11813658 | 14 | 87,370,892  | 0.003455 | -0.235 | -0.211 |  |  |     |                  |         |
| cg01015123 | 3  | 161,214,690 | 0.02189  | -0.235 | -0.191 |  |  |     | <i>OTOL1</i>     | 1stExon |
| cg03267167 | 19 | 29,587,012  | 0.023587 | -0.235 | -0.140 |  |  |     |                  |         |
| cg14573759 | 18 | 73,966,755  | 0.002495 | -0.235 | -0.202 |  |  |     |                  |         |
| cg20566970 | 3  | 137,321,245 | 0.008284 | -0.235 | -0.314 |  |  |     |                  |         |
| cg00347056 | 8  | 3,254,000   | 0.000304 | -0.235 | -0.186 |  |  |     | <i>CSMD1</i>     | Body    |
| cg13097102 | 1  | 172,886,544 | 0.003649 | -0.235 | -0.279 |  |  |     |                  |         |
| cg21899520 | 18 | 71,957,896  | 0.000183 | -0.235 | -0.175 |  |  |     | <i>CYB5A</i>     | Body    |
| cg05424333 | 16 | 86,718,577  | 0.006002 | -0.235 | -0.209 |  |  |     |                  |         |
| cg18674899 | 6  | 83,904,319  | 3.83E-05 | -0.235 | -0.279 |  |  |     | <i>PGM3</i>      | TSS1500 |
| cg24150385 | 3  | 66,543,263  | 1.3E-06  | -0.235 | -0.224 |  |  |     | <i>LRIG1</i>     | Body    |
| cg05677630 | 22 | 22,020,012  | 4.05E-07 | -0.235 | -0.200 |  |  |     | <i>PPIL2</i>     | TSS1500 |
| cg12033297 | 1  | 176,998,801 | 0.000522 | -0.235 | -0.222 |  |  |     | <i>MIR488</i>    | TSS1500 |
| cg18116418 | 1  | 152,553,244 | 5.47E-10 | -0.235 | -0.223 |  |  | Yes | <i>LCE3D</i>     | TSS1500 |
| cg03752741 | 15 | 84,168,459  | 2.31E-12 | -0.235 | -0.229 |  |  |     | <i>SH3GL3</i>    | Body    |
| cg11012557 | 14 | 70,512,583  | 1.54E-05 | -0.235 | -0.200 |  |  |     | <i>SLC8A3</i>    | 3'UTR   |
| cg07810733 | 12 | 66,324,092  | 2.57E-06 | -0.235 | -0.247 |  |  |     | <i>HMGA2</i>     | Body    |
| cg13555050 | 4  | 111,985,640 | 0.000433 | -0.235 | -0.169 |  |  |     |                  |         |
| cg15961219 | 14 | 53,960,406  | 2.16E-07 | -0.235 | -0.263 |  |  |     |                  |         |
| cg18599533 | 19 | 58,627,297  | 0.01152  | -0.235 | -0.181 |  |  |     | <i>ZSCAN18</i>   | Body    |
| cg22862319 | 1  | 3,289,994   | 1.74E-05 | -0.235 | -0.200 |  |  |     | <i>PRDM16</i>    | Body    |
| cg16836250 | 11 | 87,224,821  | 0.000793 | -0.235 | -0.239 |  |  |     |                  |         |
| cg25912428 | 10 | 125,427,770 | 0.000617 | -0.235 | -0.198 |  |  |     | <i>GPR26</i>     | Body    |
| cg14181111 | 1  | 168,773,313 | 9.87E-06 | -0.235 | -0.233 |  |  |     |                  |         |
| cg15304679 | 7  | 53,104,001  | 0.013574 | -0.235 | -0.149 |  |  |     | <i>POM121L12</i> | 1stExon |
| cg24456981 | 10 | 26,930,863  | 0.005324 | -0.235 | -0.224 |  |  |     | <i>LOC731789</i> | TSS1500 |
| cg02539662 | 12 | 93,560,520  | 0.000532 | -0.236 | -0.284 |  |  |     |                  |         |
| cg24764810 | 6  | 31,025,949  | 0.000795 | -0.236 | -0.144 |  |  |     | <i>HCG22</i>     | Body    |
| cg13412154 | 12 | 127,941,600 | 7.01E-06 | -0.236 | -0.187 |  |  |     |                  |         |

|            |    |             |          |        |        |            |        |  |                |         |
|------------|----|-------------|----------|--------|--------|------------|--------|--|----------------|---------|
| cg22868951 | 4  | 129,767,588 | 0.001626 | -0.236 | -0.204 |            |        |  | <i>PHF17</i>   | Body    |
| cg25765936 | 8  | 58,130,041  | 0.01488  | -0.236 | -0.178 |            |        |  |                |         |
| cg20703895 | 1  | 157,407,802 | 0.040933 | -0.236 | -0.206 |            |        |  |                |         |
| cg24338513 | 1  | 210,072,223 | 0.00042  | -0.236 | -0.173 |            |        |  |                |         |
| cg24536691 | 6  | 33,238,768  | 5.14E-05 | -0.236 | -0.229 |            |        |  | <i>VPS52</i>   | Body    |
| cg03861532 | 20 | 56,275,607  | 0.01916  | -0.236 | -0.274 |            |        |  | <i>PMEPA1</i>  | 5'UTR   |
| cg24826784 | 6  | 131,952,764 | 6.92E-06 | -0.236 | -0.208 |            |        |  |                |         |
| cg25562958 | 14 | 101,490,676 | 0.023591 | -0.236 | -0.222 |            |        |  | <i>MIR1197</i> | TSS1500 |
| cg18577239 | 12 | 53,955,664  | 2.4E-07  | -0.236 | -0.247 |            |        |  | <i>ATF7</i>    | Body    |
| cg06700060 | 12 | 65,859,647  | 0.007552 | -0.236 | -0.226 |            |        |  | <i>MSRB3</i>   | 3'UTR   |
| cg04136817 | 17 | 32,369,686  | 0.026043 | -0.236 | -0.133 |            |        |  | <i>ACCN1</i>   | Body    |
| cg11970733 | 12 | 129,469,367 | 0.00255  | -0.236 | -0.166 |            |        |  | <i>GLT1D1</i>  | 3'UTR   |
| cg16691898 | 1  | 156,255,600 | 0.011358 | -0.236 | -0.258 |            |        |  | <i>TMEM79</i>  | Body    |
| cg03137700 | 2  | 32,905,314  | 3.16E-09 | -0.236 | -0.260 |            |        |  | <i>TTC27</i>   | Body    |
| cg03379894 | 5  | 141,131,868 | 5.11E-07 | -0.236 | -0.201 |            |        |  |                |         |
| cg09295202 | 14 | 21,535,394  | 9.39E-05 | -0.236 | -0.176 |            |        |  |                |         |
| cg20681783 | 5  | 8,839,868   | 0.000141 | -0.236 | -0.221 |            |        |  |                |         |
| cg00874605 | 16 | 14,569,598  | 1.11E-08 | -0.236 | -0.243 |            |        |  | <i>PARN</i>    | Body    |
| cg24380053 | 3  | 13,028,632  | 8.86E-13 | -0.236 | -0.240 |            |        |  | <i>IQSEC1</i>  | Body    |
| cg02224329 | 2  | 185,740,590 | 0.003677 | -0.236 | -0.275 |            |        |  | <i>ZNF804A</i> | Body    |
| cg15073065 | 12 | 34,530,380  | 4.73E-05 | -0.236 | -0.190 |            |        |  |                |         |
| cg20267897 | 20 | 62,433,369  | 0.010724 | -0.236 | -0.149 |            |        |  | <i>ZBTB46</i>  | 5'UTR   |
| cg07711387 | 16 | 51,529,443  | 0.01015  | -0.236 | -0.181 |            |        |  |                |         |
| cg21166092 | 5  | 1,763,818   | 2.65E-10 | -0.236 | -0.219 |            |        |  |                |         |
| cg18311633 | 2  | 155,309,539 | 0.000193 | -0.236 | -0.138 |            |        |  | <i>GALNT13</i> | 3'UTR   |
| cg16506887 | 11 | 6,867,337   | 0.019913 | -0.236 | -0.271 |            |        |  | <i>OR10A5</i>  | 1stExon |
| cg18348318 | 4  | 7,736,837   | 0.001234 | -0.236 | -0.148 |            |        |  | <i>SORCS2</i>  | Body    |
| cg20070090 | 1  | 153,363,489 | 9.14E-07 | -0.236 | -0.249 | 0.00207367 | -0.043 |  | <i>S100A8</i>  | 5'UTR   |
| cg21656251 | 2  | 240,031,700 | 4.57E-12 | -0.236 | -0.218 |            |        |  | <i>HDAC4</i>   | Body    |
| cg00239171 | 4  | 136,198,747 | 0.001715 | -0.236 | -0.228 |            |        |  |                |         |
| cg05918292 | 14 | 47,834,520  | 0.000179 | -0.236 | -0.244 |            |        |  | <i>MDGA2</i>   | Body    |
| cg13711538 | 13 | 77,283,725  | 0.043262 | -0.236 | -0.196 |            |        |  |                |         |
| cg06738239 | 1  | 2,789,089   | 0.007589 | -0.236 | -0.151 |            |        |  |                |         |
| cg16855440 | 19 | 45,842,723  | 1.49E-06 | -0.236 | -0.212 |            |        |  | <i>KLC3</i>    | TSS1500 |

|            |    |             |          |        |        |           |        |     |                  |         |
|------------|----|-------------|----------|--------|--------|-----------|--------|-----|------------------|---------|
| cg07629125 | 13 | 58,299,015  | 0.004429 | -0.236 | -0.159 |           |        |     | <i>PCDH17</i>    | Body    |
| cg12799790 | 10 | 54,071,134  | 0.002673 | -0.236 | -0.192 |           |        |     |                  |         |
| cg27100471 | 11 | 794,834     | 1.3E-08  | -0.236 | -0.234 |           |        |     | <i>SLC25A22</i>  | Body    |
| cg16911872 | 7  | 152,591,175 | 5.33E-05 | -0.236 | -0.169 |           |        |     |                  |         |
| cg08746033 | 4  | 175,897,327 | 0.042627 | -0.236 | -0.123 |           |        |     | <i>ADAM29</i>    | Body    |
| cg17185705 | 8  | 89,123,876  | 0.005815 | -0.236 | -0.139 |           |        |     | <i>MMP16</i>     | Body    |
| cg13550670 | 14 | 70,547,432  | 0.001555 | -0.236 | -0.235 |           |        |     | <i>SLC8A3</i>    | Body    |
| cg27270968 | 16 | 48,846,874  | 0.02024  | -0.236 | -0.230 |           |        | Yes |                  |         |
| cg20207414 | 12 | 55,423,208  | 0.000189 | -0.236 | -0.174 |           |        |     | <i>NEUROD4</i>   | 3'UTR   |
| cg00431835 | 16 | 86,796,158  | 0.007486 | -0.236 | -0.180 |           |        |     |                  |         |
| cg10838380 | 10 | 1,156,113   | 0.04261  | -0.236 | -0.236 |           |        |     | <i>WDR37</i>     | Body    |
| cg19315730 | 4  | 49,320,210  | 0.023685 | -0.236 | -0.121 |           |        |     |                  |         |
| cg14571619 | 3  | 100,537,801 | 0.001211 | -0.236 | -0.159 |           |        |     | <i>ABI3BP</i>    | Body    |
| cg15711987 | 10 | 99,393,886  | 1.91E-05 | -0.236 | -0.193 |           |        |     | <i>MORN4</i>     | 1stExon |
| cg03015672 | 10 | 32,216,066  | 0.001937 | -0.236 | -0.263 |           |        |     | <i>ARHGAP12</i>  | 5'UTR   |
| cg19274618 | 12 | 50,240,958  | 7.56E-06 | -0.236 | -0.208 |           |        |     |                  |         |
| cg22258892 | 17 | 77,042,315  | 1.78E-10 | -0.236 | -0.211 |           |        |     | <i>C1QTNF1</i>   | 5'UTR   |
| cg04071644 | X  | 149,613,662 | 0.001214 | -0.236 | -0.282 |           |        |     | <i>MAMLD1</i>    | TSS200  |
| cg07340651 | 11 | 94,038,819  | 0.009867 | -0.236 | -0.261 |           |        |     | <i>FOLR4</i>     | 1stExon |
| cg09325375 | 11 | 22,450,715  | 0.003225 | -0.236 | -0.222 |           |        |     |                  |         |
| cg26151163 | 2  | 239,079,168 | 2.38E-07 | -0.236 | -0.208 |           |        |     | <i>ILKAP</i>     | 3'UTR   |
| cg00364325 | 15 | 89,342,191  | 0.005501 | -0.236 | -0.145 |           |        |     |                  |         |
| cg10269560 | 16 | 88,133,238  | 1.45E-12 | -0.236 | -0.205 |           |        |     |                  |         |
| cg03043911 | X  | 86,771,551  | 0.005698 | -0.236 | -0.206 |           |        |     | <i>KLHL4</i>     | TSS1500 |
| cg05862007 | 2  | 48,950,153  | 0.030114 | -0.236 | -0.162 |           |        |     | <i>GTF2A1L</i>   | Body    |
| cg25925578 | 8  | 8,388,047   | 0.001636 | -0.236 | -0.283 |           |        |     |                  |         |
| cg09555879 | 19 | 42,569,956  | 0.013233 | -0.236 | -0.153 | 0.0000017 | -0.100 |     | <i>GRIK5</i>     | 1stExon |
| cg09640686 | 16 | 89,496,981  | 1.39E-06 | -0.236 | -0.210 |           |        |     | <i>ANKRD11</i>   | 5'UTR   |
| cg22226342 | 21 | 31,693,907  | 5.02E-07 | -0.236 | -0.222 |           |        |     | <i>KRTAP26-1</i> | TSS1500 |
| cg23521262 | 10 | 114,323,333 | 1.23E-08 | -0.236 | -0.228 |           |        |     | <i>VTI1A</i>     | Body    |
| cg26901096 | 10 | 10,994,189  | 0.027425 | -0.236 | -0.200 |           |        |     | <i>LOC254312</i> | TSS200  |
| cg06634886 | 5  | 5,033,763   | 0.022391 | -0.236 | -0.184 |           |        |     | <i>LOC340094</i> | TSS1500 |
| cg23638725 | 7  | 48,965,301  | 0.00133  | -0.236 | -0.205 |           |        |     | <i>CDC14C</i>    | Body    |
| cg01027010 | 16 | 31,576,339  | 0.000412 | -0.236 | -0.199 |           |        |     |                  |         |



|            |    |             |          |        |        |  |  |  |                     |         |
|------------|----|-------------|----------|--------|--------|--|--|--|---------------------|---------|
| cg17936359 | 3  | 168,524,260 | 0.003231 | -0.236 | -0.175 |  |  |  | <i>C3orf50</i>      | Body    |
| cg21831485 | 7  | 31,594,014  | 2.26E-07 | -0.236 | -0.238 |  |  |  | <i>CCDC129</i>      | Body    |
| cg23377607 | 17 | 39,728,362  | 0.006813 | -0.236 | -0.125 |  |  |  | <i>KRT9</i>         | TSS200  |
| cg05776787 | 3  | 38,835,276  | 0.045865 | -0.236 | -0.138 |  |  |  | <i>SCN10A</i>       | 1stExon |
| cg25015038 | 14 | 89,604,062  | 5.75E-16 | -0.236 | -0.249 |  |  |  |                     |         |
| cg08019151 | 3  | 38,836,991  | 0.002836 | -0.236 | -0.140 |  |  |  | <i>SCN10A</i>       | TSS1500 |
| cg12298697 | 6  | 32,850,425  | 1.32E-10 | -0.236 | -0.236 |  |  |  |                     |         |
| cg18296784 | 11 | 116,147,929 | 0.000435 | -0.236 | -0.166 |  |  |  |                     |         |
| cg02661623 | 7  | 105,603,743 | 3.53E-09 | -0.236 | -0.234 |  |  |  | <i>FLI23834</i>     | 1stExon |
| cg23452220 | 4  | 16,846,297  | 5.44E-06 | -0.236 | -0.243 |  |  |  | <i>LDB2</i>         | Body    |
| cg06647930 | 22 | 45,135,965  | 0.000266 | -0.236 | -0.201 |  |  |  | <i>PRR5-ARHGAP8</i> | Body    |
| cg15734955 | 17 | 79,977,477  | 0.04274  | -0.236 | -0.091 |  |  |  | <i>STRA13</i>       | Body    |
| cg27325772 | Y  | 9,178,472   | 0.000116 | -0.236 | -0.184 |  |  |  |                     |         |
| cg00174201 | 7  | 10,819,370  | 0.010537 | -0.236 | -0.138 |  |  |  |                     |         |
| cg00242951 | 3  | 9,596,482   | 0.000657 | -0.236 | -0.203 |  |  |  | <i>LHFPL4</i>       | TSS1500 |
| cg01538165 | 8  | 71,240,128  | 4.18E-09 | -0.236 | -0.241 |  |  |  | <i>NCOA2</i>        | 5'UTR   |
| cg13837822 | 10 | 26,931,731  | 0.01811  | -0.236 | -0.157 |  |  |  | <i>LOC731789</i>    | TSS1500 |
| cg12989041 | 6  | 159,049,761 | 0.006931 | -0.236 | -0.280 |  |  |  | <i>TMEM181</i>      | Body    |
| cg01713348 | 16 | 1,480,790   | 1.21E-06 | -0.236 | -0.251 |  |  |  | <i>C16orf91</i>     | TSS1500 |
| cg13519373 | 2  | 219,030,898 | 0.009858 | -0.237 | -0.182 |  |  |  | <i>CXCR1</i>        | 5'UTR   |
| cg16746901 | 11 | 2,428,431   | 0.0173   | -0.237 | -0.146 |  |  |  | <i>TRPM5</i>        | Body    |
| cg26674487 | 3  | 9,590,728   | 0.009947 | -0.237 | -0.175 |  |  |  | <i>LHFPL4</i>       | Body    |
| cg26144569 | 2  | 38,304,804  | 0.000133 | -0.237 | -0.241 |  |  |  | <i>CYP1B1</i>       | TSS1500 |
| cg26254050 | 5  | 25,193,483  | 0.011959 | -0.237 | -0.196 |  |  |  |                     |         |
| cg05834895 | 3  | 69,172,203  | 4.29E-11 | -0.237 | -0.237 |  |  |  | <i>LMOD3</i>        | TSS1500 |
| cg07213415 | 8  | 144,254,866 | 1.13E-06 | -0.237 | -0.241 |  |  |  |                     |         |
| cg09158638 | 16 | 62,309,996  | 0.014757 | -0.237 | -0.145 |  |  |  |                     |         |
| cg16626760 | 6  | 41,621,322  | 7.55E-11 | -0.237 | -0.213 |  |  |  | <i>MDF1</i>         | 3'UTR   |
| cg19026320 | 21 | 31,588,354  | 4.29E-06 | -0.237 | -0.227 |  |  |  | <i>CLDN8</i>        | TSS200  |
| cg26446133 | 18 | 72,167,187  | 3.71E-06 | -0.237 | -0.170 |  |  |  | <i>CNDP2</i>        | 5'UTR   |
| cg08849514 | 5  | 106,530,218 | 0.035804 | -0.237 | -0.072 |  |  |  |                     |         |
| cg18839416 | 1  | 12,805,849  | 5.87E-10 | -0.237 | -0.240 |  |  |  | <i>C1orf158</i>     | TSS1500 |
| cg04281426 | 5  | 69,345,099  | 3.85E-08 | -0.237 | -0.255 |  |  |  | <i>SMN2</i>         | TSS1500 |
| cg09469812 | 1  | 2,899,497   | 0.000686 | -0.237 | -0.161 |  |  |  |                     |         |

|            |    |             |          |        |        |  |  |     |  |                |         |
|------------|----|-------------|----------|--------|--------|--|--|-----|--|----------------|---------|
| cg17162911 | 8  | 13,209,750  | 0.029697 | -0.237 | -0.237 |  |  |     |  | <i>DLC1</i>    | Body    |
| cg03963963 | 10 | 44,434,410  | 0.008269 | -0.237 | -0.229 |  |  |     |  |                |         |
| cg22164298 | 4  | 114,276,834 | 0.021462 | -0.237 | -0.099 |  |  |     |  | <i>ANK2</i>    | Body    |
| cg27475652 | 8  | 24,774,727  | 0.004112 | -0.237 | -0.160 |  |  |     |  | <i>NEFM</i>    | Body    |
| cg03319695 | 18 | 59,156,627  | 0.001508 | -0.237 | -0.170 |  |  |     |  | <i>CDH20</i>   | TSS1500 |
| cg12575429 | 17 | 77,029,518  | 0.001396 | -0.237 | -0.112 |  |  |     |  | <i>C1QTNF1</i> | 5'UTR   |
| cg20333727 | 11 | 1,889,893   | 0.00028  | -0.237 | -0.194 |  |  |     |  | <i>LSP1</i>    | TSS200  |
| cg13137032 | 4  | 5,904,897   | 0.025425 | -0.237 | -0.122 |  |  |     |  |                |         |
| cg16298813 | 1  | 2,878,455   | 0.023708 | -0.237 | -0.101 |  |  |     |  |                |         |
| cg07616471 | 3  | 46,413,711  | 2.88E-09 | -0.237 | -0.224 |  |  |     |  | <i>CCR5</i>    | 5'UTR   |
| cg11001769 | 14 | 61,748,440  | 2.2E-05  | -0.237 | -0.246 |  |  |     |  | <i>TMEM30B</i> | 1stExon |
| cg13123025 | 4  | 190,661,960 | 0.018812 | -0.237 | -0.153 |  |  |     |  |                |         |
| cg05829696 | 8  | 140,488,084 | 0.005901 | -0.237 | -0.139 |  |  |     |  |                |         |
| cg00653455 | 3  | 53,914,075  | 0.004519 | -0.237 | -0.263 |  |  |     |  | <i>ACTR8</i>   | Body    |
| cg24087039 | 4  | 62,788,690  | 3.61E-05 | -0.237 | -0.170 |  |  |     |  | <i>LPHN3</i>   | Body    |
| cg27410383 | 16 | 29,179,329  | 0.002596 | -0.237 | -0.156 |  |  |     |  |                |         |
| cg11465466 | 17 | 39,549,192  | 0.031556 | -0.237 | -0.084 |  |  |     |  |                |         |
| cg14838801 | 2  | 234,385,359 | 0.000548 | -0.237 | -0.157 |  |  |     |  | <i>USP40</i>   | 3'UTR   |
| cg01793704 | 7  | 130,126,024 | 9.36E-06 | -0.237 | -0.252 |  |  |     |  | <i>MEST</i>    | TSS200  |
| cg01794405 | 1  | 198,869,002 | 0.013302 | -0.237 | -0.113 |  |  |     |  |                |         |
| cg23313963 | 6  | 32,023,923  | 0.033085 | -0.237 | -0.093 |  |  |     |  | <i>TNXB</i>    | Body    |
| cg00233633 | 7  | 29,153,560  | 4.9E-05  | -0.237 | -0.230 |  |  |     |  | <i>CPVL</i>    | Body    |
| cg19886365 | 8  | 56,159,797  | 0.029417 | -0.237 | -0.223 |  |  |     |  | <i>XKR4</i>    | Body    |
| cg16219583 | 5  | 135,702,333 | 0.000235 | -0.237 | -0.198 |  |  | Yes |  | <i>TRPC7</i>   | TSS1500 |
| cg06332269 | 19 | 1,978,692   | 0.006109 | -0.237 | -0.213 |  |  |     |  | <i>CSNK1G2</i> | Body    |
| cg25528806 | 11 | 124,190,035 | 5.71E-05 | -0.237 | -0.234 |  |  |     |  | <i>OR8D2</i>   | 1stExon |
| cg05465955 | 17 | 40,715,236  | 1.6E-13  | -0.237 | -0.222 |  |  |     |  | <i>COASY</i>   | 1stExon |
| cg12641024 | 17 | 40,070,691  | 1.96E-08 | -0.237 | -0.235 |  |  |     |  | <i>ACLY</i>    | 5'UTR   |
| cg06455190 | 13 | 19,451,923  | 0.039667 | -0.237 | -0.143 |  |  |     |  |                |         |
| cg21201572 | 7  | 16,844,606  | 0.007282 | -0.237 | -0.312 |  |  |     |  | <i>AGR2</i>    | 5'UTR   |
| cg01246444 | 2  | 161,775,589 | 2.66E-11 | -0.237 | -0.222 |  |  |     |  |                |         |
| cg17130745 | 1  | 81,797,258  | 8.22E-13 | -0.237 | -0.254 |  |  |     |  |                |         |
| cg20784899 | 7  | 32,341,352  | 0.022176 | -0.237 | -0.111 |  |  |     |  |                |         |
| cg02008627 | 16 | 6,318,633   | 0.010271 | -0.237 | -0.188 |  |  |     |  | <i>A2BP1</i>   | 5'UTR   |

|            |    |             |          |        |        |  |  |     |                  |         |
|------------|----|-------------|----------|--------|--------|--|--|-----|------------------|---------|
| cg07060505 | 12 | 116,756,136 | 6.21E-08 | -0.237 | -0.245 |  |  |     |                  |         |
| cg08500510 | 10 | 6,216,350   | 0.000898 | -0.237 | -0.183 |  |  |     | <i>PFKFB3</i>    | Body    |
| cg09529437 | 16 | 24,136,792  | 1.24E-06 | -0.237 | -0.231 |  |  |     | <i>PRKCB</i>     | Body    |
| cg25793597 | 10 | 9,450,986   | 5.69E-05 | -0.237 | -0.244 |  |  |     |                  |         |
| cg00175487 | 14 | 101,490,186 | 0.014672 | -0.237 | -0.215 |  |  |     | <i>MIR380</i>    | TSS1500 |
| cg12611013 | 13 | 103,047,760 | 3.15E-06 | -0.237 | -0.185 |  |  |     | <i>FGF14</i>     | Body    |
| cg20899213 | 3  | 142,546,545 | 0.00769  | -0.237 | -0.106 |  |  |     | <i>PCOLCE2</i>   | Body    |
| cg07581462 | 4  | 178,038,657 | 7.87E-05 | -0.237 | -0.214 |  |  |     |                  |         |
| cg25002129 | 11 | 131,965,815 | 0.013038 | -0.237 | -0.207 |  |  |     | <i>NTM</i>       | Body    |
| cg22514075 | 1  | 99,357,073  | 0.00023  | -0.237 | -0.284 |  |  |     | <i>LPPR5</i>     | 3'UTR   |
| cg07725167 | 11 | 66,185,078  | 0.004438 | -0.237 | -0.230 |  |  |     |                  |         |
| cg26640927 | 4  | 120,726,319 | 4.37E-05 | -0.237 | -0.241 |  |  |     |                  |         |
| cg04066021 | 16 | 86,293,287  | 2.49E-05 | -0.237 | -0.231 |  |  |     |                  |         |
| cg06076518 | 8  | 130,307,191 | 0.011788 | -0.237 | -0.212 |  |  |     |                  |         |
| cg13379558 | 19 | 14,797,552  | 0.001033 | -0.237 | -0.178 |  |  |     |                  |         |
| cg23885889 | 10 | 19,400,365  | 4.67E-05 | -0.237 | -0.201 |  |  |     |                  |         |
| cg00444360 | 11 | 88,270,612  | 0.003391 | -0.237 | -0.156 |  |  |     | <i>GRM5</i>      | Body    |
| cg00013660 | 9  | 140,068,770 | 0.001065 | -0.237 | -0.154 |  |  |     |                  |         |
| cg08478046 | 19 | 42,093,086  | 5.96E-05 | -0.237 | -0.217 |  |  |     | <i>CEACAM21</i>  | 3'UTR   |
| cg22215836 | 17 | 81,026,716  | 0.00027  | -0.237 | -0.152 |  |  |     |                  |         |
| cg26745038 | 16 | 86,371,833  | 0.002343 | -0.237 | -0.199 |  |  |     | <i>LOC732275</i> | Body    |
| cg09075515 | 8  | 56,192,721  | 0.002761 | -0.237 | -0.248 |  |  |     | <i>XKR4</i>      | Body    |
| cg01046833 | 11 | 51,515,596  | 0.000627 | -0.237 | -0.216 |  |  | Yes | <i>OR4C46</i>    | 1stExon |
| cg11460714 | 7  | 63,463,421  | 5.4E-05  | -0.237 | -0.187 |  |  |     |                  |         |
| cg03770410 | 20 | 57,766,332  | 0.002656 | -0.237 | -0.165 |  |  |     | <i>ZNF831</i>    | 1stExon |
| cg25712758 | 19 | 8,271,179   | 0.000101 | -0.237 | -0.193 |  |  |     |                  |         |
| cg18087023 | 1  | 153,014,956 | 0.001745 | -0.237 | -0.210 |  |  |     | <i>SPRR2D</i>    | TSS1500 |
| cg27645294 | 17 | 21,795,257  | 0.026625 | -0.237 | -0.105 |  |  |     |                  |         |
| cg10012711 | 6  | 28,553,927  | 0.016527 | -0.237 | -0.147 |  |  |     | <i>SCAND3</i>    | Body    |
| cg10132287 | 10 | 131,584,334 | 4.37E-05 | -0.237 | -0.205 |  |  |     |                  |         |
| cg16199460 | 5  | 5,087,391   | 1.89E-08 | -0.237 | -0.215 |  |  |     |                  |         |
| cg22319016 | 11 | 86,663,418  | 1.14E-09 | -0.237 | -0.210 |  |  |     | <i>FZD4</i>      | Body    |
| cg04692506 | 11 | 47,401,027  | 1.43E-10 | -0.237 | -0.240 |  |  |     | <i>SPI1</i>      | TSS1500 |
| cg04357225 | 14 | 98,153,758  | 0.014715 | -0.237 | -0.168 |  |  |     |                  |         |

|            |    |             |          |        |        |           |        |     |                 |         |
|------------|----|-------------|----------|--------|--------|-----------|--------|-----|-----------------|---------|
| cg08913410 | 7  | 30,726,859  | 5.42E-09 | -0.237 | -0.214 |           |        |     |                 |         |
| cg00736299 | 16 | 4,730,465   | 6.47E-09 | -0.237 | -0.204 |           |        | Yes | <i>MGRN1</i>    | Body    |
| cg22433447 | 7  | 39,288,391  | 0.00018  | -0.237 | -0.210 |           |        |     | <i>POU6F2</i>   | Body    |
| cg08245989 | 12 | 9,280,923   | 0.006728 | -0.238 | -0.170 |           |        |     |                 |         |
| cg26311677 | 3  | 168,142,949 | 0.003622 | -0.238 | -0.181 |           |        |     | <i>C3orf50</i>  | Body    |
| cg07989466 | 12 | 64,797,213  | 6.41E-08 | -0.238 | -0.241 |           |        |     | <i>XPOT</i>     | TSS1500 |
| cg16464328 | 17 | 42,346,923  | 3.01E-08 | -0.238 | -0.232 |           |        |     | <i>SLC4A1</i>   | TSS1500 |
| cg19821682 | 1  | 4,849,063   | 0.006543 | -0.238 | -0.156 |           |        |     |                 |         |
| cg24327361 | 8  | 4,583,386   | 0.004795 | -0.238 | -0.222 |           |        |     | <i>CSMD1</i>    | Body    |
| cg13897627 | 16 | 49,378,497  | 0.011009 | -0.238 | -0.161 | 0.0000027 | -0.110 |     |                 |         |
| cg21605238 | 13 | 39,264,965  | 0.009231 | -0.238 | -0.238 |           |        |     | <i>FREM2</i>    | 1stExon |
| cg24803687 | 11 | 5,462,916   | 0.001817 | -0.238 | -0.217 |           |        |     | <i>OR5111</i>   | TSS200  |
| cg24995678 | 2  | 235,936,394 | 5.08E-07 | -0.238 | -0.216 |           |        |     | <i>SH3BP4</i>   | 5'UTR   |
| cg18125814 | 11 | 49,455,214  | 0.000451 | -0.238 | -0.188 |           |        |     |                 |         |
| cg18186478 | 8  | 23,423,960  | 1.93E-05 | -0.238 | -0.199 |           |        |     | <i>SLC25A37</i> | Body    |
| cg16112050 | 18 | 713,200     | 0.000508 | -0.238 | -0.281 | 1.57E-15  | -0.140 |     | <i>ENOSF1</i>   | TSS1500 |
| cg21871038 | 6  | 50,697,940  | 0.000307 | -0.238 | -0.227 |           |        | Yes | <i>TFAP2D</i>   | Body    |
| cg19964491 | 6  | 32,016,236  | 0.03476  | -0.238 | -0.050 |           |        |     | <i>TNXB</i>     | Body    |
| cg19656820 | 11 | 34,535,085  | 0.015307 | -0.238 | -0.243 |           |        |     | <i>ELF5</i>     | 5'UTR   |
| cg22852840 | 6  | 47,749,714  | 5.04E-05 | -0.238 | -0.231 |           |        |     | <i>OPN5</i>     | TSS200  |
| cg06859106 | 4  | 17,582,677  | 0.006927 | -0.238 | -0.220 |           |        | Yes | <i>LAP3</i>     | Body    |
| cg06515543 | 19 | 5,823,791   | 0.003853 | -0.238 | -0.176 |           |        |     | <i>NRTN</i>     | TSS200  |
| cg02413104 | X  | 150,395,248 | 9.21E-06 | -0.238 | -0.240 |           |        |     |                 |         |
| cg14346895 | 9  | 37,576,819  | 4.58E-09 | -0.238 | -0.231 |           |        |     | <i>FBXO10</i>   | TSS1500 |
| cg00014104 | 22 | 22,220,367  | 1.81E-12 | -0.238 | -0.238 |           |        |     | <i>MAPK1</i>    | Body    |
| cg01165661 | 3  | 49,157,146  | 2.04E-05 | -0.238 | -0.216 |           |        |     | <i>USP19</i>    | 5'UTR   |
| cg19437852 | 19 | 56,195,465  | 2.25E-05 | -0.238 | -0.237 |           |        |     | <i>EPN1</i>     | Body    |
| cg03462901 | 15 | 93,613,453  | 1.07E-05 | -0.238 | -0.253 |           |        |     | <i>RGMA</i>     | Body    |
| cg27338353 | 22 | 46,471,129  | 2.51E-16 | -0.238 | -0.218 |           |        |     |                 |         |
| cg09561365 | 22 | 45,676,755  | 1.82E-05 | -0.238 | -0.226 |           |        |     |                 |         |
| cg09043962 | 17 | 79,694,615  | 1.36E-05 | -0.238 | -0.246 |           |        |     |                 |         |
| cg26152051 | 2  | 219,994,830 | 4.27E-08 | -0.238 | -0.226 |           |        |     | <i>NHEJ1</i>    | Body    |
| cg27247689 | 8  | 73,445,394  | 1.55E-05 | -0.238 | -0.241 |           |        |     |                 |         |
| cg06465306 | X  | 84,503,836  | 8.3E-06  | -0.238 | -0.185 |           |        |     | <i>ZNF711</i>   | Body    |

|            |    |             |          |        |        |           |        |     |         |         |
|------------|----|-------------|----------|--------|--------|-----------|--------|-----|---------|---------|
| cg14139814 | 7  | 83,378,795  | 0.03441  | -0.238 | -0.191 |           |        |     |         |         |
| cg03452625 | 3  | 11,537,620  | 0.041838 | -0.238 | -0.223 |           |        |     | ATG7    | Body    |
| cg15975283 | 1  | 173,571,345 | 0.012857 | -0.238 | -0.270 |           |        |     | SLC9A11 | 5'UTR   |
| cg00134787 | 17 | 10,419,499  | 0.006621 | -0.238 | -0.189 | 0.0000704 | -0.140 |     | MYH1    | Body    |
| cg00090787 | 15 | 66,795,345  | 8.69E-09 | -0.238 | -0.235 |           |        |     | RPL4    | Body    |
| cg03284670 | 16 | 55,909,732  | 0.00632  | -0.238 | -0.142 |           |        |     | CES7    | TSS1500 |
| cg16847374 | X  | 152,772,343 | 1.22E-05 | -0.238 | -0.205 |           |        |     | BGN     | Body    |
| cg17770910 | 8  | 143,851,427 | 0.03899  | -0.238 | -0.156 |           |        |     | LYNX1   | TSS200  |
| cg03579179 | 7  | 12,444,095  | 1.73E-06 | -0.238 | -0.244 |           |        |     | VWDE    | TSS1500 |
| cg06627043 | 1  | 147,838,662 | 1.65E-08 | -0.238 | -0.201 |           |        |     |         |         |
| cg27296413 | 1  | 159,037,843 | 0.008148 | -0.238 | -0.267 |           |        |     | AIM2    | Body    |
| cg01518790 | 20 | 9,823,348   | 0.005597 | -0.238 | -0.137 |           |        |     |         |         |
| cg06617217 | 12 | 56,708,578  | 1.86E-07 | -0.238 | -0.242 |           |        |     | CNPY2   | Body    |
| cg14128411 | 2  | 1,926,907   | 0.01011  | -0.238 | -0.283 |           |        |     | MYT1L   | Body    |
| cg24935655 | 3  | 193,097,750 | 0.049865 | -0.238 | -0.092 |           |        |     | ATP13A5 | TSS1500 |
| cg25799589 | 4  | 146,800,380 | 1.9E-12  | -0.238 | -0.240 |           |        |     | ZNF827  | Body    |
| cg21997401 | 4  | 12,225,077  | 0.008658 | -0.238 | -0.258 |           |        |     |         |         |
| cg01761453 | X  | 140,983,037 | 0.019217 | -0.238 | -0.157 |           |        |     | MAGEC3  | Body    |
| cg08026039 | 16 | 1,486,384   | 0.014766 | -0.238 | -0.111 |           |        |     | CCDC154 | Body    |
| cg14909213 | 12 | 8,694,468   | 0.008138 | -0.238 | -0.145 |           |        |     | CLEC4E  | TSS1500 |
| cg13050115 | 3  | 73,503,670  | 2.98E-07 | -0.238 | -0.249 |           |        |     | PDZRN3  | Body    |
| cg02282041 | 16 | 82,908,556  | 0.0025   | -0.238 | -0.227 |           |        |     | CDH13   | Body    |
| cg01916400 | 5  | 155,548,458 | 3.3E-13  | -0.238 | -0.226 |           |        |     |         |         |
| cg03228766 | 7  | 57,878,945  | 0.00082  | -0.238 | -0.206 |           |        |     |         |         |
| cg05749728 | 10 | 126,826,902 | 6.59E-05 | -0.238 | -0.195 |           |        |     | CTBP2   | 5'UTR   |
| cg13631222 | 3  | 147,654,565 | 0.001866 | -0.238 | -0.190 |           |        | Yes |         |         |
| cg14624463 | 3  | 153,947,356 | 0.006939 | -0.238 | -0.115 |           |        |     | SGEF    | Body    |
| cg11472422 | 17 | 80,926,014  | 0.000538 | -0.238 | -0.259 |           |        |     | B3GNTL1 | Body    |
| cg07826516 | 5  | 3,106,230   | 0.029288 | -0.238 | -0.116 |           |        |     |         |         |
| cg19740476 | 12 | 130,750,328 | 0.035615 | -0.238 | -0.122 |           |        |     |         |         |
| cg26014066 | X  | 66,763,094  | 9.08E-07 | -0.238 | -0.218 |           |        |     | AR      | TSS1500 |
| cg19029127 | 4  | 37,604,497  | 4.92E-11 | -0.238 | -0.196 |           |        |     | RELL1   | 3'UTR   |
| cg21684179 | 1  | 110,576,933 | 0.002549 | -0.238 | -0.165 |           |        |     | FAM40A  | TSS1500 |
| cg03582419 | 4  | 177,804,777 | 0.018822 | -0.238 | -0.136 |           |        |     |         |         |

|            |    |             |          |        |        |  |  |  |                     |         |
|------------|----|-------------|----------|--------|--------|--|--|--|---------------------|---------|
| cg08833126 | 4  | 180,086,254 | 1.18E-05 | -0.238 | -0.252 |  |  |  |                     |         |
| cg14030940 | 14 | 101,906,274 | 0.004198 | -0.238 | -0.182 |  |  |  |                     |         |
| cg26354750 | 10 | 38,499,434  | 9.63E-06 | -0.238 | -0.213 |  |  |  | <i>LOC100129055</i> | Body    |
| cg14126408 | 10 | 44,705,342  | 0.004455 | -0.238 | -0.258 |  |  |  |                     |         |
| cg19809669 | 6  | 151,346,268 | 0.002597 | -0.238 | -0.190 |  |  |  | <i>MTHFD1L</i>      | Body    |
| cg13290059 | 2  | 104,781,890 | 0.018423 | -0.238 | -0.234 |  |  |  |                     |         |
| cg05784226 | 2  | 91,923,833  | 0.034593 | -0.238 | -0.104 |  |  |  |                     |         |
| cg07151197 | 13 | 87,098,885  | 0.000195 | -0.238 | -0.188 |  |  |  |                     |         |
| cg14150803 | 1  | 8,035,305   | 3.99E-10 | -0.238 | -0.229 |  |  |  | <i>PARK7</i>        | Body    |
| cg18161211 | 4  | 177,716,461 | 0.000451 | -0.238 | -0.241 |  |  |  |                     |         |
| cg22614624 | 2  | 242,618,417 | 2.5E-06  | -0.238 | -0.228 |  |  |  | <i>DTYMK</i>        | Body    |
| cg10652558 | 7  | 57,208,277  | 0.000108 | -0.238 | -0.208 |  |  |  | <i>ZNF479</i>       | TSS1500 |
| cg11534519 | 5  | 171,534,678 | 5.93E-05 | -0.238 | -0.163 |  |  |  | <i>STK10</i>        | Body    |
| cg12492670 | 11 | 50,231,261  | 0.006253 | -0.238 | -0.156 |  |  |  |                     |         |
| cg00133403 | 16 | 57,212,731  | 4.83E-06 | -0.238 | -0.194 |  |  |  | <i>FAM192A</i>      | 5'UTR   |
| cg07795402 | 1  | 2,938,954   | 0.03026  | -0.238 | -0.068 |  |  |  | <i>ACTRT2</i>       | 1stExon |
| cg24197116 | X  | 68,110,972  | 8.35E-07 | -0.238 | -0.251 |  |  |  |                     |         |
| cg09884146 | 2  | 65,593,908  | 1.38E-22 | -0.239 | -0.229 |  |  |  | <i>SPRED2</i>       | 5'UTR   |
| cg18748085 | 5  | 22,372,872  | 0.003299 | -0.239 | -0.191 |  |  |  | <i>CDH12</i>        | 5'UTR   |
| cg09450467 | 22 | 39,711,262  | 0.049495 | -0.239 | -0.144 |  |  |  | <i>SNORD83B</i>     | TSS1500 |
| cg12905592 | 12 | 50,091,449  | 1.16E-08 | -0.239 | -0.223 |  |  |  | <i>FMNL3</i>        | Body    |
| cg25133753 | 20 | 44,299,726  | 0.009633 | -0.239 | -0.214 |  |  |  | <i>WFDC11</i>       | TSS1500 |
| cg11958666 | 8  | 5,019,242   | 0.007572 | -0.239 | -0.180 |  |  |  |                     |         |
| cg09261791 | 14 | 52,347,968  | 8.12E-06 | -0.239 | -0.247 |  |  |  | <i>GNG2</i>         | 5'UTR   |
| cg09775238 | 16 | 86,580,410  | 4.26E-05 | -0.239 | -0.214 |  |  |  | <i>MTHFSD</i>       | Body    |
| cg00268869 | 11 | 91,884,576  | 0.001655 | -0.239 | -0.252 |  |  |  |                     |         |
| cg00863469 | 19 | 49,116,423  | 0.000311 | -0.239 | -0.247 |  |  |  | <i>FAM83E</i>       | 1stExon |
| cg16383871 | 6  | 31,888,543  | 0.004673 | -0.239 | -0.204 |  |  |  |                     |         |
| cg19880077 | 12 | 131,975,791 | 0.049193 | -0.239 | -0.194 |  |  |  |                     |         |
| cg24174145 | 12 | 52,585,892  | 4.52E-09 | -0.239 | -0.207 |  |  |  | <i>KRT80</i>        | TSS200  |
| cg10575986 | 7  | 154,003,309 | 0.020352 | -0.239 | -0.159 |  |  |  | <i>DPP6</i>         | Body    |
| cg03804732 | 12 | 14,136,365  | 0.023412 | -0.239 | -0.233 |  |  |  |                     |         |
| cg18548400 | 3  | 182,506,874 | 8.29E-05 | -0.239 | -0.244 |  |  |  |                     |         |
| cg20978858 | 22 | 41,653,226  | 5.04E-07 | -0.239 | -0.207 |  |  |  | <i>RANGAP1</i>      | Body    |

|            |    |             |          |        |        |  |  |  |                   |         |
|------------|----|-------------|----------|--------|--------|--|--|--|-------------------|---------|
| cg19911494 | 5  | 9,169,758   | 0.00094  | -0.239 | -0.174 |  |  |  | <i>SEMA5A</i>     | Body    |
| cg20949198 | 6  | 134,317,925 | 0.000101 | -0.239 | -0.248 |  |  |  | <i>SLC2A12</i>    | Body    |
| cg12610078 | 3  | 82,547,324  | 0.007098 | -0.239 | -0.182 |  |  |  |                   |         |
| cg12169568 | 14 | 89,708,532  | 1.62E-05 | -0.239 | -0.177 |  |  |  | <i>FOXN3</i>      | Body    |
| cg23257105 | 11 | 45,671,015  | 0.004265 | -0.239 | -0.093 |  |  |  | <i>CHST1</i>      | 3'UTR   |
| cg20615517 | 17 | 3,213,559   | 0.013671 | -0.239 | -0.105 |  |  |  | <i>OR3A4</i>      | Body    |
| cg25986727 | 11 | 71,723,428  | 0.001297 | -0.239 | -0.180 |  |  |  | <i>NUMA1</i>      | Body    |
| cg27289628 | 19 | 29,458,302  | 0.031032 | -0.239 | -0.140 |  |  |  | <i>LOC148145</i>  | Body    |
| cg06059043 | 16 | 559,311     | 9.11E-11 | -0.239 | -0.248 |  |  |  | <i>RAB11FIP3</i>  | Body    |
| cg20521198 | 4  | 27,102,907  | 4.02E-07 | -0.239 | -0.248 |  |  |  |                   |         |
| cg17450075 | 12 | 130,411,204 | 0.002066 | -0.239 | -0.195 |  |  |  |                   |         |
| cg11576988 | 6  | 26,544,615  | 8.1E-12  | -0.239 | -0.220 |  |  |  | <i>HMGN4</i>      | 5'UTR   |
| cg11592631 | 2  | 119,470,715 | 0.000371 | -0.239 | -0.233 |  |  |  |                   |         |
| cg12163365 | 8  | 140,465,582 | 0.014208 | -0.239 | -0.157 |  |  |  |                   |         |
| cg15050328 | 3  | 124,448,651 | 4.33E-06 | -0.239 | -0.253 |  |  |  | <i>UMPS</i>       | TSS1500 |
| cg27258696 | 11 | 20,987,359  | 0.002098 | -0.239 | -0.256 |  |  |  | <i>NELL1</i>      | Body    |
| cg01997606 | 5  | 151,308,141 | 0.000183 | -0.239 | -0.235 |  |  |  |                   |         |
| cg03954343 | 12 | 15,822,734  | 6.03E-06 | -0.239 | -0.255 |  |  |  | <i>EPS8</i>       | Body    |
| cg26561570 | 1  | 161,602,002 | 0.002117 | -0.239 | -0.212 |  |  |  | <i>FCGR3B</i>     | TSS1500 |
| cg03447413 | 16 | 86,912,782  | 0.00162  | -0.239 | -0.144 |  |  |  |                   |         |
| cg10875257 | 6  | 28,554,274  | 1.53E-14 | -0.239 | -0.229 |  |  |  | <i>SCAND3</i>     | 1stExon |
| cg07163168 | 1  | 76,899,846  | 7.83E-07 | -0.239 | -0.218 |  |  |  | <i>ST6GALNAC3</i> | Body    |
| cg13540060 | 6  | 141,793,045 | 0.001824 | -0.239 | -0.163 |  |  |  |                   |         |
| cg17035109 | 21 | 10,882,029  | 0.000606 | -0.239 | -0.175 |  |  |  |                   |         |
| cg01274257 | 22 | 31,746,540  | 9.89E-05 | -0.239 | -0.227 |  |  |  |                   |         |
| cg16333374 | 2  | 88,579,997  | 0.007993 | -0.239 | -0.211 |  |  |  |                   |         |
| cg24813857 | 4  | 16,859,428  | 9.62E-08 | -0.239 | -0.229 |  |  |  | <i>LDB2</i>       | Body    |
| cg16099871 | 8  | 13,296,183  | 0.009125 | -0.239 | -0.180 |  |  |  | <i>DLC1</i>       | Body    |
| cg20669366 | 8  | 142,283,615 | 0.000416 | -0.239 | -0.222 |  |  |  |                   |         |
| cg02858817 | X  | 26,155,148  | 0.003169 | -0.239 | -0.256 |  |  |  | <i>MAGEB18</i>    | TSS1500 |
| cg10626107 | 1  | 2,564,880   | 0.001459 | -0.239 | -0.148 |  |  |  | <i>MMEL1</i>      | TSS1500 |
| cg15797102 | 4  | 17,158,272  | 0.007241 | -0.239 | -0.191 |  |  |  |                   |         |
| cg00268945 | 13 | 81,229,541  | 0.009634 | -0.239 | -0.139 |  |  |  |                   |         |
| cg05502478 | 3  | 182,911,560 | 1.79E-11 | -0.239 | -0.233 |  |  |  | <i>MCF2L2</i>     | Body    |

|            |    |             |          |        |        |  |  |     |                |         |
|------------|----|-------------|----------|--------|--------|--|--|-----|----------------|---------|
| cg26500457 | 11 | 122,733,080 | 8.32E-06 | -0.239 | -0.223 |  |  |     | <i>CRTAM</i>   | Body    |
| cg05753046 | 11 | 67,801,224  | 6.27E-11 | -0.239 | -0.213 |  |  |     | <i>NDUFS8</i>  | Body    |
| cg14717069 | 13 | 103,945,151 | 1.77E-06 | -0.239 | -0.213 |  |  |     |                |         |
| cg13401840 | 1  | 153,112,816 | 0.013617 | -0.239 | -0.190 |  |  |     | <i>SPRR2C</i>  | Body    |
| cg16241391 | 1  | 181,470,120 | 0.002017 | -0.239 | -0.296 |  |  |     | <i>CACNA1E</i> | Body    |
| cg18528145 | X  | 91,130,234  | 0.000352 | -0.239 | -0.204 |  |  |     | <i>PCDH11X</i> | Body    |
| cg02826368 | 4  | 175,839,610 | 0.012605 | -0.239 | -0.164 |  |  |     | <i>ADAM29</i>  | 1stExon |
| cg07241908 | 8  | 56,284,622  | 0.013407 | -0.239 | -0.270 |  |  |     | <i>XKR4</i>    | Body    |
| cg06386009 | 16 | 86,743,964  | 0.000716 | -0.239 | -0.167 |  |  | Yes |                |         |
| cg08292485 | 20 | 29,993,663  | 1.33E-07 | -0.239 | -0.249 |  |  |     | <i>DEFB121</i> | Body    |
| cg26974681 | 14 | 98,012,978  | 0.020732 | -0.239 | -0.145 |  |  |     |                |         |
| cg06657560 | 12 | 121,841,372 | 9.32E-09 | -0.239 | -0.237 |  |  |     | <i>RNF34</i>   | Body    |
| cg15473569 | 17 | 45,854,061  | 0.000816 | -0.239 | -0.175 |  |  |     |                |         |
| cg22253078 | 2  | 212,196,399 | 0.00013  | -0.239 | -0.219 |  |  |     |                |         |
| cg20622565 | 13 | 112,906,400 | 0.044006 | -0.239 | -0.054 |  |  |     |                |         |
| cg10366786 | 4  | 53,578,129  | 0.000121 | -0.239 | -0.237 |  |  |     | <i>SNORA26</i> | TSS1500 |
| cg18988856 | 7  | 99,425,577  | 4.18E-06 | -0.239 | -0.235 |  |  |     | <i>CYP3A43</i> | TSS200  |
| cg07804289 | 1  | 153,114,690 | 0.007843 | -0.240 | -0.215 |  |  |     | <i>SPRR2C</i>  | TSS1500 |
| cg12027248 | 8  | 2,820,857   | 0.046554 | -0.240 | -0.141 |  |  |     | <i>CSMD1</i>   | Body    |
| cg00028056 | 2  | 220,407,171 | 1.57E-07 | -0.240 | -0.203 |  |  |     | <i>CHPF</i>    | Body    |
| cg24121168 | 3  | 58,652,503  | 3.3E-08  | -0.240 | -0.244 |  |  |     | <i>FAM3D</i>   | 1stExon |
| cg24525744 | 6  | 144,217,883 | 2.1E-06  | -0.240 | -0.248 |  |  |     | <i>C6orf94</i> | Body    |
| cg03369029 | X  | 52,847,274  | 7.78E-06 | -0.240 | -0.256 |  |  |     | <i>XAGE5</i>   | 3'UTR   |
| cg10600594 | 6  | 30,176,107  | 0.001801 | -0.240 | -0.227 |  |  |     | <i>TRIM26</i>  | 5'UTR   |
| cg20620783 | 11 | 7,870,238   | 0.01874  | -0.240 | -0.187 |  |  |     | <i>OR5E1P</i>  | TSS1500 |
| cg12860156 | 6  | 98,744,658  | 1.48E-06 | -0.240 | -0.232 |  |  |     |                |         |
| cg17400812 | 7  | 41,854,825  | 0.004294 | -0.240 | -0.156 |  |  |     |                |         |
| cg05890062 | 8  | 51,288,552  | 0.00218  | -0.240 | -0.203 |  |  |     | <i>SNTG1</i>   | 5'UTR   |
| cg06708731 | 9  | 136,501,420 | 0.00143  | -0.240 | -0.156 |  |  |     | <i>DBH</i>     | TSS200  |
| cg16735938 | 6  | 32,073,324  | 1.35E-05 | -0.240 | -0.234 |  |  |     | <i>TNXB</i>    | 5'UTR   |
| cg18866586 | 5  | 178,803,207 | 0.007317 | -0.240 | -0.190 |  |  |     |                |         |
| cg06427867 | 21 | 31,588,661  | 1.78E-06 | -0.240 | -0.245 |  |  |     | <i>CLDN8</i>   | TSS1500 |
| cg00629088 | 17 | 39,506,964  | 1.4E-06  | -0.240 | -0.167 |  |  |     | <i>KRT33A</i>  | 1stExon |
| cg08264124 | X  | 63,006,802  | 0.019052 | -0.240 | -0.205 |  |  |     | <i>MIR1468</i> | TSS1500 |



|            |    |             |          |        |        |            |        |  |                  |         |
|------------|----|-------------|----------|--------|--------|------------|--------|--|------------------|---------|
| cg18268863 | 11 | 55,650,046  | 1.23E-05 | -0.240 | -0.210 |            |        |  | <i>SPRYD5</i>    | TSS1500 |
| cg22952287 | X  | 103,268,599 | 0.004682 | -0.240 | -0.217 |            |        |  | <i>H2BFWT</i>    | TSS1500 |
| cg23126203 | 12 | 117,036,972 | 1.08E-08 | -0.240 | -0.219 |            |        |  |                  |         |
| cg17170463 | 4  | 157,311,747 | 0.003966 | -0.240 | -0.202 |            |        |  |                  |         |
| cg09340639 | 1  | 157,789,662 | 3.38E-17 | -0.240 | -0.245 | 0.00000012 | -0.112 |  | <i>FCRL1</i>     | Body    |
| cg23194364 | 11 | 7,870,558   | 0.002488 | -0.240 | -0.215 |            |        |  | <i>OR5E1P</i>    | TSS200  |
| cg25472174 | 11 | 55,904,782  | 0.002524 | -0.240 | -0.189 |            |        |  | <i>OR8J3</i>     | 1stExon |
| cg24597512 | 15 | 26,874,788  | 0.033091 | -0.240 | -0.333 |            |        |  | <i>GABRB3</i>    | Body    |
| cg13212525 | 3  | 161,214,813 | 0.03153  | -0.240 | -0.238 |            |        |  | <i>OTOL1</i>     | 1stExon |
| cg26420391 | 1  | 152,691,758 | 0.014047 | -0.240 | -0.158 |            |        |  | <i>C1orf68</i>   | TSS1500 |
| cg26248646 | 12 | 34,501,300  | 0.000266 | -0.240 | -0.166 |            |        |  |                  |         |
| cg01642901 | 4  | 170,190,012 | 0.019849 | -0.240 | -0.267 |            |        |  | <i>SH3RF1</i>    | Body    |
| cg26593521 | 5  | 156,594,725 | 4.34E-05 | -0.240 | -0.238 |            |        |  | <i>FAM71B</i>    | TSS1500 |
| cg05031448 | 5  | 173,764,100 | 0.015069 | -0.240 | -0.122 |            |        |  |                  |         |
| cg12351073 | 3  | 89,312,020  | 0.008191 | -0.240 | -0.292 |            |        |  | <i>EPHA3</i>     | Body    |
| cg16673052 | 13 | 54,883,769  | 0.000323 | -0.240 | -0.220 |            |        |  |                  |         |
| cg03587235 | 6  | 136,682,949 | 0.00102  | -0.240 | -0.153 |            |        |  | <i>MAP7</i>      | Body    |
| cg24883742 | 5  | 41,219,519  | 0.038863 | -0.240 | -0.265 |            |        |  | <i>C6</i>        | 5'UTR   |
| cg23206888 | 2  | 242,833,114 | 1.1E-05  | -0.240 | -0.223 |            |        |  |                  |         |
| cg26959392 | 11 | 133,715,511 | 0.010903 | -0.240 | -0.160 |            |        |  | <i>SPATA19</i>   | TSS200  |
| cg04643690 | 15 | 60,907,749  | 4.66E-05 | -0.240 | -0.236 |            |        |  | <i>RORA</i>      | Body    |
| cg10451200 | 11 | 88,781,564  | 3.73E-06 | -0.240 | -0.173 |            |        |  | <i>GRM5</i>      | 5'UTR   |
| cg06485032 | 13 | 22,615,064  | 6.84E-05 | -0.240 | -0.178 |            |        |  |                  |         |
| cg08346127 | 20 | 31,871,019  | 1.13E-05 | -0.240 | -0.218 |            |        |  | <i>C20orf114</i> | 1stExon |
| cg08291487 | X  | 145,075,914 | 0.002469 | -0.240 | -0.246 |            |        |  | <i>MIR890</i>    | TSS200  |
| cg01055386 | 12 | 128,900,228 | 0.041437 | -0.240 | -0.202 |            |        |  | <i>TMEM132C</i>  | Body    |
| cg26116669 | 2  | 88,654,640  | 0.003962 | -0.240 | -0.210 |            |        |  |                  |         |
| cg03481903 | 2  | 242,066,203 | 0.004874 | -0.240 | -0.096 |            |        |  | <i>PASK</i>      | Body    |
| cg24035112 | 4  | 159,441,687 | 0.019279 | -0.240 | -0.225 |            |        |  | <i>RXFP1</i>     | TSS1500 |
| cg01184591 | 7  | 57,249,065  | 8.15E-08 | -0.240 | -0.197 |            |        |  | <i>LOC642006</i> | TSS1500 |
| cg08254089 | 20 | 36,933,189  | 0.004762 | -0.240 | -0.142 | 5.86E-17   | -0.171 |  | <i>BPI</i>       | Body    |
| cg11559769 | 6  | 133,944,167 | 0.005017 | -0.240 | -0.173 |            |        |  |                  |         |
| cg18369913 | 11 | 51,515,083  | 1.72E-05 | -0.240 | -0.229 |            |        |  | <i>OR4C46</i>    | TSS200  |
| cg19589427 | 1  | 173,019,720 | 7.99E-09 | -0.240 | -0.264 | 2.01E-16   | -0.155 |  | <i>TNFSF18</i>   | Body    |

|            |    |             |          |        |        |  |  |     |                 |         |
|------------|----|-------------|----------|--------|--------|--|--|-----|-----------------|---------|
| cg02852025 | 7  | 50,348,174  | 0.013705 | -0.240 | -0.205 |  |  |     | <i>IKZF1</i>    | 5'UTR   |
| cg13987885 | 9  | 37,591,782  | 0.000187 | -0.240 | -0.215 |  |  |     | <i>TOMM5</i>    | Body    |
| cg14040633 | 17 | 73,996,331  | 1.86E-05 | -0.240 | -0.230 |  |  |     | <i>CDK3</i>     | TSS1500 |
| cg20271985 | 11 | 71,238,270  | 2.58E-06 | -0.240 | -0.213 |  |  |     | <i>KRTAP5-7</i> | TSS200  |
| cg06180910 | 22 | 24,382,663  | 0.005332 | -0.240 | -0.155 |  |  |     | <i>GSTT1</i>    | Body    |
| cg16524240 | 15 | 93,316,187  | 0.028199 | -0.240 | -0.340 |  |  |     |                 |         |
| cg24082215 | 17 | 56,297,515  | 4.28E-05 | -0.240 | -0.220 |  |  |     | <i>MKS1</i>     | TSS1500 |
| cg24592194 | 2  | 125,410,491 | 8.61E-05 | -0.240 | -0.258 |  |  |     | <i>CNTNAP5</i>  | Body    |
| cg18098498 | 4  | 173,589,088 | 0.011927 | -0.240 | -0.182 |  |  |     | <i>GALNTL6</i>  | Body    |
| cg02306493 | 19 | 13,044,967  | 0.013439 | -0.240 | -0.310 |  |  |     | <i>FARSA</i>    | TSS1500 |
| cg26068654 | 1  | 109,505,079 | 7.27E-09 | -0.240 | -0.204 |  |  |     | <i>CLCC1</i>    | 5'UTR   |
| cg02077688 | 12 | 127,257,703 | 0.001292 | -0.240 | -0.161 |  |  |     |                 |         |
| cg02553039 | 22 | 49,563,521  | 0.003767 | -0.240 | -0.181 |  |  |     |                 |         |
| cg26289291 | 13 | 30,028,229  | 4.62E-07 | -0.240 | -0.217 |  |  |     | <i>MTUS2</i>    | Body    |
| cg24119990 | 3  | 187,386,810 | 0.000957 | -0.240 | -0.191 |  |  |     | <i>SST</i>      | 3'UTR   |
| cg13666232 | 2  | 229,048,814 | 6.61E-05 | -0.240 | -0.242 |  |  |     |                 |         |
| cg26712821 | 3  | 15,244,698  | 1.29E-11 | -0.240 | -0.201 |  |  |     | <i>DVWA</i>     | Body    |
| cg26258396 | 17 | 3,182,940   | 0.003801 | -0.240 | -0.130 |  |  |     | <i>OR3A2</i>    | TSS1500 |
| cg27265778 | 1  | 158,116,650 | 0.008736 | -0.240 | -0.140 |  |  |     |                 |         |
| cg25977492 | 6  | 29,365,261  | 0.044348 | -0.240 | -0.190 |  |  | Yes | <i>OR12D2</i>   | 1stExon |
| cg13564460 | 6  | 72,301,257  | 8.76E-05 | -0.240 | -0.287 |  |  |     |                 |         |
| cg22014430 | 1  | 24,077,973  | 7.6E-05  | -0.240 | -0.145 |  |  |     | <i>TCEB3</i>    | Body    |
| cg02450563 | 1  | 54,839,981  | 0.000309 | -0.240 | -0.244 |  |  |     | <i>SSBP3</i>    | Body    |
| cg04126957 | 1  | 1,479,238   | 1.49E-06 | -0.240 | -0.224 |  |  |     | <i>SSU72</i>    | Body    |
| cg05681072 | 6  | 30,104,982  | 0.000124 | -0.240 | -0.184 |  |  |     | <i>TRIM40</i>   | 1stExon |
| cg07456376 | 17 | 39,557,589  | 0.001258 | -0.240 | -0.179 |  |  | Yes |                 |         |
| cg16011217 | 1  | 152,777,382 | 0.003001 | -0.240 | -0.197 |  |  |     | <i>LCE1C</i>    | 3'UTR   |
| cg00347856 | 7  | 53,879,253  | 0.021363 | -0.240 | -0.203 |  |  |     |                 |         |
| cg10799386 | 10 | 108,332,882 | 0.030387 | -0.241 | -0.236 |  |  |     |                 |         |
| cg19864539 | 22 | 25,747,688  | 2.81E-11 | -0.241 | -0.257 |  |  |     | <i>LRP5L</i>    | 3'UTR   |
| cg16680624 | 7  | 30,516,376  | 9.32E-08 | -0.241 | -0.256 |  |  |     | <i>NOD1</i>     | 5'UTR   |
| cg06753367 | 22 | 24,256,600  | 1.6E-05  | -0.241 | -0.242 |  |  |     |                 |         |
| cg09135320 | 1  | 158,737,591 | 0.002274 | -0.241 | -0.185 |  |  |     | <i>OR6N1</i>    | TSS1500 |
| cg21087481 | 8  | 13,947,812  | 0.007065 | -0.241 | -0.202 |  |  |     | <i>SGCZ</i>     | 3'UTR   |

|            |    |             |          |        |        |            |        |  |                   |         |
|------------|----|-------------|----------|--------|--------|------------|--------|--|-------------------|---------|
| cg03884238 | 9  | 112,970,590 | 1.33E-05 | -0.241 | -0.224 |            |        |  | <i>C9orf152</i>   | TSS200  |
| cg14869505 | 12 | 57,037,657  | 1.24E-05 | -0.241 | -0.243 |            |        |  | <i>ATP5B</i>      | Body    |
| cg23015361 | 3  | 83,656,006  | 1.66E-06 | -0.241 | -0.227 |            |        |  |                   |         |
| cg03926958 | 10 | 9,354,305   | 0.015959 | -0.241 | -0.152 |            |        |  |                   |         |
| cg16797473 | 6  | 142,277,658 | 0.00085  | -0.241 | -0.189 |            |        |  |                   |         |
| cg01749213 | 2  | 219,906,749 | 8.94E-05 | -0.241 | -0.226 |            |        |  | <i>CCDC108</i>    | TSS1500 |
| cg06250841 | 8  | 58,138,048  | 1.02E-06 | -0.241 | -0.241 |            |        |  |                   |         |
| cg08960663 | 7  | 63,893,895  | 1.08E-07 | -0.241 | -0.224 |            |        |  | <i>LOC649395</i>  | TSS200  |
| cg12032650 | 7  | 73,864,404  | 6.86E-07 | -0.241 | -0.171 |            |        |  |                   |         |
| cg16742703 | 19 | 51,357,857  | 1.87E-08 | -0.241 | -0.237 | 0.00078295 | -0.084 |  | <i>KLK3</i>       | TSS1500 |
| cg01977473 | 5  | 125,800,916 | 7.72E-06 | -0.241 | -0.254 |            |        |  | <i>GRAMD3</i>     | Body    |
| cg12085265 | 1  | 2,014,628   | 0.001803 | -0.241 | -0.115 |            |        |  | <i>PRKCZ</i>      | Body    |
| cg22174681 | 1  | 2,013,930   | 2.72E-06 | -0.241 | -0.231 |            |        |  | <i>PRKCZ</i>      | Body    |
| cg00151048 | 1  | 102,098,127 | 0.000749 | -0.241 | -0.217 |            |        |  |                   |         |
| cg04414849 | 11 | 44,159,002  | 4.91E-07 | -0.241 | -0.233 |            |        |  | <i>EXT2</i>       | Body    |
| cg20000220 | 8  | 144,800,997 | 0.000165 | -0.241 | -0.242 |            |        |  | <i>MAPK15</i>     | Body    |
| cg15726040 | 2  | 115,598,354 | 6.05E-05 | -0.241 | -0.240 |            |        |  | <i>DPP10</i>      | Body    |
| cg25375916 | 3  | 155,570,275 | 0.000136 | -0.241 | -0.226 |            |        |  | <i>SLC33A1</i>    | Body    |
| cg00460691 | 6  | 65,779,514  | 0.021276 | -0.241 | -0.184 |            |        |  | <i>EYS</i>        | Body    |
| cg10503208 | 11 | 5,545,506   | 0.000172 | -0.241 | -0.246 |            |        |  |                   |         |
| cg11035122 | 14 | 101,491,994 | 0.007132 | -0.241 | -0.220 |            |        |  | <i>MIR758</i>     | TSS1500 |
| cg26287521 | 6  | 30,019,655  | 4.01E-06 | -0.241 | -0.242 |            |        |  | <i>NCRNA00171</i> | Body    |
| cg24995904 | 8  | 32,462,945  | 0.000427 | -0.241 | -0.206 |            |        |  | <i>NRG1</i>       | Body    |
| cg23161733 | 10 | 108,385,382 | 0.049016 | -0.241 | -0.173 |            |        |  | <i>SORCS1</i>     | Body    |
| cg15444478 | 12 | 130,494,697 | 0.000554 | -0.241 | -0.169 |            |        |  |                   |         |
| cg26552743 | 11 | 58,826,414  | 9.72E-09 | -0.241 | -0.223 |            |        |  |                   |         |
| cg01206349 | 22 | 49,762,220  | 0.028991 | -0.241 | -0.141 |            |        |  |                   |         |
| cg08053115 | Y  | 9,605,072   | 3.24E-05 | -0.241 | -0.235 |            |        |  | <i>TTY1</i>       | Body    |
| cg20005760 | 15 | 44,830,861  | 5.76E-08 | -0.241 | -0.227 |            |        |  | <i>EIF3J</i>      | Body    |
| cg00004105 | 10 | 100,022,608 | 2.41E-11 | -0.241 | -0.217 |            |        |  | <i>LOXL4</i>      | Body    |
| cg14599380 | 4  | 17,310,680  | 3.31E-08 | -0.241 | -0.235 |            |        |  |                   |         |
| cg05454961 | 16 | 62,745,680  | 0.001575 | -0.241 | -0.222 |            |        |  |                   |         |
| cg26815032 | 6  | 55,956,315  | 1.36E-06 | -0.241 | -0.243 |            |        |  | <i>COL21A1</i>    | Body    |
| cg24058145 | 6  | 29,523,592  | 0.002253 | -0.241 | -0.173 |            |        |  | <i>UBD</i>        | 3'UTR   |

|            |    |             |          |        |        |          |        |  |                  |         |
|------------|----|-------------|----------|--------|--------|----------|--------|--|------------------|---------|
| cg07433373 | 7  | 79,080,588  | 0.011073 | -0.241 | -0.208 |          |        |  | <i>MAGI2</i>     | Body    |
| cg15841533 | 15 | 92,715,189  | 0.004645 | -0.241 | -0.202 |          |        |  | <i>SLCO3A1</i>   | 3'UTR   |
| cg21067632 | 3  | 71,258,221  | 0.000788 | -0.241 | -0.232 |          |        |  | <i>FOXP1</i>     | 5'UTR   |
| cg22538712 | 2  | 5,216,945   | 5.36E-08 | -0.241 | -0.196 |          |        |  |                  |         |
| cg14786212 | 3  | 192,947,753 | 0.003435 | -0.241 | -0.159 |          |        |  |                  |         |
| cg09557341 | 13 | 104,057,520 | 0.027748 | -0.241 | -0.182 |          |        |  |                  |         |
| cg10024505 | 14 | 76,818,832  | 3.34E-06 | -0.241 | -0.207 |          |        |  |                  |         |
| cg02035366 | 7  | 79,085,293  | 0.00263  | -0.241 | -0.223 |          |        |  |                  |         |
| cg15963988 | 4  | 15,895,695  | 0.00047  | -0.241 | -0.187 |          |        |  |                  |         |
| cg09322899 | 2  | 240,280,217 | 0.003561 | -0.241 | -0.221 |          |        |  | <i>HDAC4</i>     | 5'UTR   |
| cg22535084 | 7  | 1,426,162   | 0.000946 | -0.241 | -0.137 |          |        |  |                  |         |
| cg26470501 | 19 | 45,252,955  | 1.21E-11 | -0.241 | -0.229 |          |        |  | <i>BCL3</i>      | Body    |
| cg05852888 | 5  | 141,075,426 | 2.68E-15 | -0.241 | -0.224 |          |        |  |                  |         |
| cg07557612 | 8  | 73,008,545  | 0.00082  | -0.241 | -0.250 |          |        |  |                  |         |
| cg26380106 | 11 | 29,650,449  | 0.004801 | -0.241 | -0.236 |          |        |  |                  |         |
| cg01522553 | 1  | 110,775,554 | 0.009164 | -0.241 | -0.068 |          |        |  | <i>KCNC4</i>     | Body    |
| cg20416179 | 6  | 150,690,143 | 2.71E-09 | -0.241 | -0.209 | 6.38E-19 | -0.140 |  | <i>IYD</i>       | 5'UTR   |
| cg09614626 | 21 | 22,175,001  | 0.030792 | -0.241 | -0.128 |          |        |  | <i>C21orf131</i> | Body    |
| cg16348715 | 10 | 26,763,087  | 4.39E-05 | -0.241 | -0.244 |          |        |  | <i>APBB1IP</i>   | 5'UTR   |
| cg19832898 | 10 | 71,010,742  | 4.18E-09 | -0.241 | -0.236 |          |        |  | <i>HKDC1</i>     | Body    |
| cg01687402 | 17 | 48,620,661  | 5.23E-07 | -0.241 | -0.234 |          |        |  | <i>EPN3</i>      | 3'UTR   |
| cg27158462 | 15 | 26,873,818  | 0.041388 | -0.241 | -0.316 |          |        |  | <i>GABRB3</i>    | Body    |
| cg02764898 | X  | 16,966,893  | 7.15E-08 | -0.241 | -0.228 |          |        |  | <i>REPS2</i>     | Body    |
| cg23552820 | 17 | 64,272,071  | 4.69E-07 | -0.241 | -0.171 |          |        |  |                  |         |
| cg13419884 | 2  | 226,446,871 | 0.010267 | -0.241 | -0.114 |          |        |  | <i>KIAA1486</i>  | Body    |
| cg10711871 | 3  | 13,860,812  | 0.00044  | -0.241 | -0.173 |          |        |  | <i>WNT7A</i>     | Body    |
| cg22446206 | 1  | 185,743,787 | 0.018904 | -0.241 | -0.178 |          |        |  | <i>HMCN1</i>     | Body    |
| cg16883726 | 8  | 50,729,333  | 0.002304 | -0.241 | -0.227 |          |        |  |                  |         |
| cg06518781 | 19 | 22,703,283  | 0.018473 | -0.241 | -0.150 |          |        |  |                  |         |
| cg07704181 | 12 | 120,975,110 | 2.91E-05 | -0.241 | -0.199 |          |        |  | <i>RNF10</i>     | Body    |
| cg07994859 | 13 | 79,328,636  | 0.005713 | -0.241 | -0.260 |          |        |  |                  |         |
| cg12646227 | 1  | 46,805,334  | 0.00093  | -0.241 | -0.293 |          |        |  | <i>NSUN4</i>     | TSS1500 |
| cg13498184 | X  | 144,337,589 | 8.13E-08 | -0.241 | -0.229 |          |        |  | <i>SPANXN1</i>   | 3'UTR   |
| cg16146353 | 2  | 115,199,477 | 3.39E-06 | -0.241 | -0.228 |          |        |  | <i>DPP10</i>     | TSS1500 |

|            |    |             |          |        |        |          |        |     |                 |         |
|------------|----|-------------|----------|--------|--------|----------|--------|-----|-----------------|---------|
| cg24656207 | 11 | 36,030,086  | 0.006541 | -0.241 | -0.181 |          |        |     | <i>LDLRAD3</i>  | Body    |
| cg08167466 | 13 | 48,073,444  | 0.001241 | -0.241 | -0.255 |          |        |     |                 |         |
| cg18060081 | 4  | 173,630,259 | 0.015538 | -0.241 | -0.203 |          |        |     | <i>GALNTL6</i>  | Body    |
| cg01072969 | 19 | 51,108,274  | 0.004204 | -0.241 | -0.175 |          |        |     | <i>SNAR-F</i>   | Body    |
| cg01961387 | 6  | 32,944,195  | 5.81E-05 | -0.241 | -0.311 |          |        |     | <i>BRD2</i>     | Body    |
| cg22083633 | 5  | 4,143,214   | 0.006471 | -0.241 | -0.206 |          |        |     |                 |         |
| cg22585255 | 11 | 57,519,288  | 6.28E-10 | -0.241 | -0.203 |          |        |     | <i>BTBD18</i>   | TSS200  |
| cg10500084 | 5  | 174,172,044 | 0.00353  | -0.241 | -0.163 |          |        |     |                 |         |
| cg09185990 | 12 | 22,090,231  | 0.000386 | -0.242 | -0.151 |          |        |     | <i>ABCC9</i>    | TSS1500 |
| cg20306025 | 7  | 57,207,952  | 0.003814 | -0.242 | -0.144 |          |        |     | <i>ZNF479</i>   | TSS1500 |
| cg00377916 | 20 | 30,008,986  | 9.34E-09 | -0.242 | -0.184 |          |        |     | <i>DEFB122</i>  | TSS1500 |
| cg07944396 | 16 | 7,382,514   | 0.00281  | -0.242 | -0.175 |          |        |     | <i>A2BP1</i>    | Body    |
| cg13364756 | 7  | 99,425,193  | 2.89E-06 | -0.242 | -0.224 |          |        | Yes | <i>CYP3A43</i>  | TSS1500 |
| cg24851859 | 5  | 27,532,684  | 0.033979 | -0.242 | -0.118 |          |        |     |                 |         |
| cg02993944 | 11 | 132,831,381 | 0.016068 | -0.242 | -0.184 |          |        |     | <i>OPCML</i>    | Body    |
| cg27628370 | 8  | 133,773,484 | 0.020461 | -0.242 | -0.182 |          |        | Yes | <i>TMEM71</i>   | TSS1500 |
| cg02360367 | 1  | 2,180,027   | 0.000424 | -0.242 | -0.254 |          |        |     | <i>SKI</i>      | Body    |
| cg04851314 | 17 | 51,900,106  | 0.006546 | -0.242 | -0.227 |          |        |     | <i>KIF2B</i>    | TSS200  |
| cg17144184 | 8  | 143,221,499 | 0.005749 | -0.242 | -0.160 |          |        |     |                 |         |
| cg11188837 | X  | 103,268,309 | 0.031334 | -0.242 | -0.159 |          |        |     | <i>H2BFWT</i>   | TSS200  |
| cg25724515 | 11 | 131,926,464 | 0.000724 | -0.242 | -0.258 |          |        |     | <i>NTM</i>      | Body    |
| cg01131388 | 3  | 157,548,511 | 0.028511 | -0.242 | -0.240 |          |        |     |                 |         |
| cg14106584 | 9  | 45,737,537  | 0.002123 | -0.242 | -0.193 |          |        |     |                 |         |
| cg16040306 | 1  | 166,353,877 | 0.001103 | -0.242 | -0.217 |          |        |     |                 |         |
| cg24884084 | 1  | 153,003,198 | 6.86E-09 | -0.242 | -0.213 |          |        |     | <i>SPRR1B</i>   | TSS1500 |
| cg04923840 | 1  | 215,228,588 | 4.18E-09 | -0.242 | -0.252 |          |        |     | <i>KCNK2</i>    | Body    |
| cg05400200 | 7  | 104,752,143 | 5.72E-08 | -0.242 | -0.251 |          |        |     | <i>MLL5</i>     | Body    |
| cg21271420 | 6  | 164,527,436 | 0.00088  | -0.242 | -0.205 |          |        |     |                 |         |
| cg11835619 | 12 | 56,475,064  | 4.57E-06 | -0.242 | -0.207 |          |        |     | <i>ERBB3</i>    | Body    |
| cg22964621 | 14 | 47,859,275  | 0.030643 | -0.242 | -0.120 |          |        |     | <i>MDGA2</i>    | Body    |
| cg12081643 | 13 | 110,802,645 | 1.96E-06 | -0.242 | -0.170 |          |        |     | <i>COL4A1</i>   | 3'UTR   |
| cg09161570 | 10 | 133,515,261 | 0.01948  | -0.242 | -0.115 |          |        |     |                 |         |
| cg02989940 | 16 | 31,539,234  | 0.002207 | -0.242 | -0.221 | 9.06E-11 | -0.178 |     | <i>AHSP</i>     | 5'UTR   |
| cg08145381 | 14 | 75,172,505  | 5.01E-05 | -0.242 | -0.257 |          |        |     | <i>KIAA0317</i> | 5'UTR   |

|            |    |             |          |        |        |  |  |  |                 |         |
|------------|----|-------------|----------|--------|--------|--|--|--|-----------------|---------|
| cg00920395 | 1  | 158,689,263 | 0.000214 | -0.242 | -0.223 |  |  |  | <i>OR6K3</i>    | TSS1500 |
| cg04989070 | 1  | 151,962,816 | 4.22E-07 | -0.242 | -0.240 |  |  |  | <i>S100A10</i>  | 5'UTR   |
| cg05345996 | 10 | 133,508,028 | 0.018835 | -0.242 | -0.131 |  |  |  |                 |         |
| cg10120807 | 16 | 69,350,190  | 5.74E-05 | -0.242 | -0.191 |  |  |  | <i>VPS4A</i>    | Body    |
| cg20696451 | 10 | 14,881,628  | 1.69E-10 | -0.242 | -0.242 |  |  |  | <i>HSPA14</i>   | Body    |
| cg26416241 | 11 | 131,557,414 | 0.018182 | -0.242 | -0.162 |  |  |  | <i>NTM</i>      | Body    |
| cg04816803 | 10 | 44,426,803  | 0.001341 | -0.242 | -0.265 |  |  |  |                 |         |
| cg27606618 | 3  | 61,826,848  | 3.53E-07 | -0.242 | -0.300 |  |  |  | <i>PTPRG</i>    | Body    |
| cg11412468 | 2  | 84,433,405  | 0.00637  | -0.242 | -0.268 |  |  |  |                 |         |
| cg09100014 | 16 | 85,937,496  | 0.040946 | -0.242 | -0.123 |  |  |  | <i>IRF8</i>     | Body    |
| cg10677214 | 4  | 22,746,262  | 0.007869 | -0.242 | -0.159 |  |  |  | <i>GBA3</i>     | Body    |
| cg13510813 | 19 | 42,571,339  | 0.002335 | -0.242 | -0.167 |  |  |  | <i>GRIK5</i>    | TSS1500 |
| cg22355525 | 6  | 28,889,876  | 0.003054 | -0.242 | -0.137 |  |  |  | <i>TRIM27</i>   | Body    |
| cg14445012 | 9  | 115,926,922 | 6.22E-10 | -0.242 | -0.228 |  |  |  |                 |         |
| cg17493193 | 1  | 26,440,896  | 4.61E-05 | -0.242 | -0.160 |  |  |  | <i>PDIK1L</i>   | Body    |
| cg00770443 | 12 | 108,611,845 | 0.00015  | -0.242 | -0.189 |  |  |  | <i>WSCD2</i>    | Body    |
| cg04307587 | 19 | 44,104,283  | 5.13E-08 | -0.242 | -0.241 |  |  |  | <i>ZNF576</i>   | 3'UTR   |
| cg06521247 | 1  | 3,209,787   | 0.009381 | -0.242 | -0.144 |  |  |  | <i>PRDM16</i>   | Body    |
| cg07599819 | 19 | 57,308,239  | 0.003766 | -0.242 | -0.232 |  |  |  | <i>ZIM2</i>     | Body    |
| cg03131092 | 19 | 7,682,983   | 1.69E-10 | -0.242 | -0.220 |  |  |  | <i>KIAA1543</i> | 3'UTR   |
| cg04995095 | 17 | 72,619,556  | 0.003576 | -0.242 | -0.149 |  |  |  | <i>CD300E</i>   | Body    |
| cg23524184 | 17 | 48,129,754  | 4.7E-05  | -0.242 | -0.243 |  |  |  |                 |         |
| cg06072769 | 10 | 50,146,962  | 0.029675 | -0.242 | -0.168 |  |  |  | <i>WDFY4</i>    | Body    |
| cg11132921 | 8  | 66,560,891  | 6.49E-05 | -0.242 | -0.246 |  |  |  | <i>MTFR1</i>    | 5'UTR   |
| cg04637490 | X  | 52,840,332  | 0.013165 | -0.242 | -0.171 |  |  |  | <i>XAGE5</i>    | TSS1500 |
| cg21396956 | 18 | 56,340,167  | 0.004744 | -0.242 | -0.122 |  |  |  | <i>MALT1</i>    | Body    |
| cg25483191 | 8  | 67,050,040  | 3.13E-07 | -0.242 | -0.249 |  |  |  | <i>TRIM55</i>   | Body    |
| cg16668520 | 8  | 55,387,024  | 0.0004   | -0.242 | -0.245 |  |  |  |                 |         |
| cg22720215 | 4  | 154,048,247 | 2.79E-07 | -0.242 | -0.239 |  |  |  |                 |         |
| cg01889956 | 6  | 100,650,602 | 7.16E-13 | -0.242 | -0.229 |  |  |  |                 |         |
| cg02693118 | 2  | 27,819,901  | 1.94E-11 | -0.242 | -0.229 |  |  |  | <i>ZNF512</i>   | Body    |
| cg01695620 | 8  | 58,122,850  | 0.039418 | -0.242 | -0.166 |  |  |  |                 |         |
| cg05240537 | X  | 103,346,747 | 0.002733 | -0.242 | -0.120 |  |  |  | <i>MIR1256</i>  | TSS1500 |
| cg04749323 | 16 | 18,039,447  | 0.006256 | -0.242 | -0.198 |  |  |  |                 |         |

|            |    |             |          |        |        |          |        |  |                  |         |
|------------|----|-------------|----------|--------|--------|----------|--------|--|------------------|---------|
| cg25299371 | 2  | 226,264,545 | 0.01594  | -0.242 | -0.118 |          |        |  | <i>KIAA1486</i>  | TSS1500 |
| cg11304383 | 12 | 7,818,635   | 3.9E-08  | -0.242 | -0.235 |          |        |  | <i>APOBEC1</i>   | TSS200  |
| cg16291917 | 6  | 31,590,576  | 4.66E-10 | -0.242 | -0.228 |          |        |  | <i>SNORA38</i>   | TSS1500 |
| cg27009703 | 7  | 27,204,894  | 0.04504  | -0.242 | -0.073 |          |        |  | <i>HOXA9</i>     | 1stExon |
| cg11639984 | 10 | 125,617,197 | 0.001355 | -0.242 | -0.195 |          |        |  | <i>CPXM2</i>     | Body    |
| cg22039724 | 4  | 75,400,046  | 7.78E-11 | -0.242 | -0.241 |          |        |  |                  |         |
| cg10678215 | 5  | 143,191,565 | 0.002804 | -0.242 | -0.152 |          |        |  | <i>HMHB1</i>     | TSS200  |
| cg26589753 | 16 | 86,932,968  | 0.029761 | -0.242 | -0.111 |          |        |  |                  |         |
| cg08426157 | 7  | 18,794,174  | 2.02E-08 | -0.242 | -0.197 |          |        |  | <i>HDAC9</i>     | Body    |
| cg03804500 | 9  | 140,081,972 | 0.000325 | -0.242 | -0.285 | 5.76E-30 | -0.202 |  | <i>ANAPC2</i>    | Body    |
| cg22226131 | 1  | 3,496,027   | 0.000152 | -0.242 | -0.206 |          |        |  | <i>MEGF6</i>     | Body    |
| cg24734347 | 22 | 49,564,133  | 0.018923 | -0.242 | -0.097 |          |        |  |                  |         |
| cg02725485 | X  | 30,577,300  | 0.003813 | -0.242 | -0.162 |          |        |  | <i>CXorf21</i>   | 3'UTR   |
| cg04285194 | 2  | 187,867,339 | 0.000367 | -0.242 | -0.218 |          |        |  |                  |         |
| cg24478733 | 11 | 90,264,861  | 2.02E-05 | -0.242 | -0.214 |          |        |  |                  |         |
| cg01097011 | 20 | 46,987,304  | 0.039685 | -0.242 | -0.260 |          |        |  | <i>LOC284749</i> | TSS1500 |
| cg14039479 | 10 | 125,454,278 | 0.00132  | -0.243 | -0.216 |          |        |  | <i>GPR26</i>     | 3'UTR   |
| cg20749510 | 20 | 62,374,070  | 0.005129 | -0.243 | -0.187 |          |        |  | <i>SLC2A4RG</i>  | Body    |
| cg25982561 | 11 | 22,696,308  | 1.01E-06 | -0.243 | -0.230 |          |        |  | <i>GAS2</i>      | 5'UTR   |
| cg06172859 | 6  | 117,866,589 | 2.78E-05 | -0.243 | -0.162 |          |        |  | <i>DCBLD1</i>    | Body    |
| cg24230893 | 11 | 108,918,285 | 0.002104 | -0.243 | -0.181 |          |        |  |                  |         |
| cg05788138 | 11 | 55,577,775  | 1.05E-08 | -0.243 | -0.220 |          |        |  | <i>OR5L1</i>     | TSS1500 |
| cg22143971 | 4  | 105,472,236 | 0.004589 | -0.243 | -0.213 |          |        |  |                  |         |
| cg12806853 | 20 | 6,193,532   | 8.7E-05  | -0.243 | -0.171 |          |        |  |                  |         |
| cg06378434 | 10 | 26,729,179  | 4.85E-05 | -0.243 | -0.204 |          |        |  | <i>APBB1IP</i>   | 5'UTR   |
| cg22946774 | 11 | 26,581,996  | 0.021825 | -0.243 | -0.144 |          |        |  | <i>MUC15</i>     | 3'UTR   |
| cg04771729 | X  | 130,929,851 | 1.58E-06 | -0.243 | -0.240 |          |        |  | <i>LOC286467</i> | Body    |
| cg05758139 | 1  | 215,169,182 | 0.032386 | -0.243 | -0.215 |          |        |  |                  |         |
| cg21704166 | 6  | 155,717,789 | 0.014008 | -0.243 | -0.166 |          |        |  | <i>NOX3</i>      | 3'UTR   |
| cg27090087 | 6  | 54,172,378  | 2.04E-14 | -0.243 | -0.236 |          |        |  | <i>TINAG</i>     | TSS1500 |
| cg02100381 | 13 | 111,025,711 | 0.004505 | -0.243 | -0.133 |          |        |  | <i>COL4A2</i>    | Body    |
| cg02637414 | 19 | 13,613,091  | 0.000253 | -0.243 | -0.194 |          |        |  | <i>CACNA1A</i>   | Body    |
| cg10832107 | 1  | 67,924,892  | 3.89E-07 | -0.243 | -0.209 |          |        |  |                  |         |
| cg01284289 | 12 | 66,025,635  | 1.84E-08 | -0.243 | -0.232 |          |        |  |                  |         |

|            |    |             |          |        |        |            |        |  |                |         |
|------------|----|-------------|----------|--------|--------|------------|--------|--|----------------|---------|
| cg17581200 | 17 | 80,040,464  | 0.001121 | -0.243 | -0.148 |            |        |  | <i>FASN</i>    | Body    |
| cg17520215 | 12 | 100,967,016 | 2.19E-09 | -0.243 | -0.210 |            |        |  | <i>GAS2L3</i>  | TSS1500 |
| cg22527898 | 10 | 95,557,610  | 0.000005 | -0.243 | -0.246 |            |        |  | <i>LGI1</i>    | 3'UTR   |
| cg24685775 | 19 | 48,771,567  | 4.13E-06 | -0.243 | -0.196 |            |        |  |                |         |
| cg02677035 | 11 | 128,592,094 | 0.034831 | -0.243 | -0.170 |            |        |  | <i>FLI1</i>    | Body    |
| cg05489252 | 3  | 183,109,869 | 1.79E-06 | -0.243 | -0.231 |            |        |  | <i>MCF2L2</i>  | Body    |
| cg00905417 | 8  | 133,141,673 | 0.020041 | -0.243 | -0.187 |            |        |  | <i>KCNQ3</i>   | Body    |
| cg22063692 | 18 | 73,966,627  | 0.012049 | -0.243 | -0.146 |            |        |  |                |         |
| cg23159678 | 14 | 27,063,169  | 0.039401 | -0.243 | -0.059 |            |        |  | <i>NOVA1</i>   | Body    |
| cg26963545 | 17 | 7,219,319   | 4.05E-07 | -0.243 | -0.222 |            |        |  | <i>NEURL4</i>  | 3'UTR   |
| cg11460364 | 2  | 162,931,397 | 5.23E-10 | -0.243 | -0.211 | 1.77E-09   | -0.100 |  | <i>DPP4</i>    | TSS1500 |
| cg22683657 | 5  | 12,663,018  | 0.000209 | -0.243 | -0.196 |            |        |  |                |         |
| cg14659547 | 3  | 108,476,126 | 3.48E-05 | -0.243 | -0.186 | 1.5E-13    | -0.191 |  | <i>RETNLB</i>  | 5'UTR   |
| cg16862361 | 2  | 31,637,622  | 1.56E-07 | -0.243 | -0.238 | 0.00043055 | -0.079 |  | <i>XDH</i>     | TSS200  |
| cg25487405 | 22 | 46,473,039  | 3.05E-13 | -0.243 | -0.209 |            |        |  |                |         |
| cg00020799 | 12 | 94,565,092  | 6.75E-06 | -0.243 | -0.244 |            |        |  | <i>PLXNC1</i>  | Body    |
| cg09177473 | X  | 103,264,980 | 0.003037 | -0.243 | -0.241 |            |        |  | <i>MIR1256</i> | Body    |
| cg25780632 | 20 | 52,687,924  | 4.75E-07 | -0.243 | -0.220 |            |        |  | <i>BCAS1</i>   | TSS1500 |
| cg14896003 | 11 | 562,366     | 0.000278 | -0.243 | -0.207 | 3.99E-21   | -0.150 |  | <i>RASSF7</i>  | Body    |
| cg17715482 | 19 | 3,979,910   | 7.81E-08 | -0.243 | -0.205 |            |        |  | <i>EEF2</i>    | Body    |
| cg25546118 | 19 | 43,257,346  | 0.000986 | -0.243 | -0.240 |            |        |  | <i>PSG8</i>    | 3'UTR   |
| cg01819142 | 8  | 139,064,307 | 0.000137 | -0.243 | -0.205 |            |        |  |                |         |
| cg09438605 | 15 | 80,757,169  | 1.22E-08 | -0.243 | -0.277 |            |        |  | <i>ARNT2</i>   | Body    |
| cg08375941 | 3  | 98,250,382  | 1.54E-06 | -0.243 | -0.185 | 3.79E-10   | -0.104 |  | <i>GPR15</i>   | TSS1500 |
| cg20691502 | 1  | 185,688,754 | 4.53E-05 | -0.243 | -0.198 |            |        |  |                |         |
| cg00691081 | 16 | 6,379,449   | 0.005965 | -0.243 | -0.172 |            |        |  | <i>A2BP1</i>   | 5'UTR   |
| cg17777531 | 8  | 88,885,043  | 0.043413 | -0.243 | -0.181 |            |        |  | <i>DCAF4L2</i> | 1stExon |
| cg24035745 | 1  | 11,702,744  | 6.59E-15 | -0.243 | -0.234 |            |        |  |                |         |
| cg03311252 | 11 | 67,209,355  | 1.64E-05 | -0.243 | -0.194 |            |        |  | <i>CORO1B</i>  | Body    |
| cg05796128 | 4  | 38,100,918  | 4.66E-08 | -0.243 | -0.210 |            |        |  | <i>TBC1D1</i>  | Body    |
| cg10168086 | 16 | 26,499,966  | 0.043048 | -0.243 | -0.261 |            |        |  |                |         |
| cg14471191 | 10 | 117,818,509 | 0.000299 | -0.243 | -0.203 |            |        |  | <i>GFRA1</i>   | 3'UTR   |
| cg23639120 | 8  | 55,243,106  | 0.000794 | -0.243 | -0.212 |            |        |  |                |         |
| cg01405242 | 8  | 131,705,773 | 0.00439  | -0.243 | -0.261 |            |        |  |                |         |



|            |    |             |          |        |        |  |  |  |                 |         |
|------------|----|-------------|----------|--------|--------|--|--|--|-----------------|---------|
| cg22978384 | 3  | 35,785,107  | 0.000913 | -0.243 | -0.216 |  |  |  | <i>MIR128-2</i> | TSS1500 |
| cg23883874 | 8  | 10,405,415  | 4.48E-06 | -0.243 | -0.232 |  |  |  |                 |         |
| cg01651688 | 8  | 73,066,751  | 0.003563 | -0.243 | -0.186 |  |  |  |                 |         |
| cg03535099 | 17 | 80,847,270  | 3.39E-05 | -0.243 | -0.247 |  |  |  | <i>TBCD</i>     | Body    |
| cg10458446 | 2  | 238,500,325 | 4.03E-09 | -0.243 | -0.203 |  |  |  | <i>RAB17</i>    | TSS1500 |
| cg22506801 | 4  | 94,304,388  | 0.025949 | -0.243 | -0.132 |  |  |  | <i>GRID2</i>    | Body    |
| cg04892758 | 16 | 7,358,470   | 6.69E-05 | -0.243 | -0.236 |  |  |  | <i>A2BP1</i>    | Body    |
| cg16178743 | 6  | 131,895,275 | 9.39E-07 | -0.243 | -0.247 |  |  |  | <i>ARG1</i>     | Body    |
| cg18055557 | 6  | 32,073,358  | 2.82E-11 | -0.243 | -0.230 |  |  |  | <i>TNXB</i>     | 5'UTR   |
| cg25100880 | 11 | 5,878,019   | 0.000501 | -0.243 | -0.235 |  |  |  | <i>OR52E8</i>   | 1stExon |
| cg07041214 | 11 | 5,968,801   | 0.025118 | -0.243 | -0.161 |  |  |  | <i>OR56A3</i>   | 1stExon |
| cg16577588 | 1  | 158,079,311 | 0.021305 | -0.243 | -0.159 |  |  |  |                 |         |
| cg09623623 | 11 | 44,862,793  | 0.001815 | -0.243 | -0.209 |  |  |  | <i>TSPAN18</i>  | 5'UTR   |
| cg12548176 | 12 | 55,640,113  | 0.004658 | -0.243 | -0.182 |  |  |  | <i>OR6C74</i>   | TSS1500 |
| cg21027599 | 6  | 159,639,549 | 0.034608 | -0.243 | -0.149 |  |  |  | <i>FNDC1</i>    | Body    |
| cg08311085 | 7  | 53,879,422  | 0.016776 | -0.243 | -0.178 |  |  |  |                 |         |
| cg27578754 | 7  | 11,012,967  | 9.44E-07 | -0.243 | -0.238 |  |  |  | <i>PHF14</i>    | TSS1500 |
| cg15197893 | 1  | 151,416,412 | 2.54E-13 | -0.243 | -0.230 |  |  |  | <i>POGZ</i>     | 5'UTR   |
| cg17489748 | 10 | 117,887,197 | 2.18E-06 | -0.243 | -0.216 |  |  |  | <i>GFRA1</i>    | Body    |
| cg21057473 | 11 | 5,346,163   | 0.000623 | -0.243 | -0.238 |  |  |  | <i>OR51B2</i>   | TSS1500 |
| cg02390084 | 12 | 28,658,805  | 2.1E-06  | -0.243 | -0.224 |  |  |  | <i>CCDC91</i>   | Body    |
| cg05864011 | 7  | 56,419,094  | 0.000138 | -0.243 | -0.238 |  |  |  |                 |         |
| cg24174996 | 11 | 124,295,015 | 0.037461 | -0.243 | -0.240 |  |  |  | <i>OR8B4</i>    | TSS1500 |
| cg16570669 | 11 | 126,923,106 | 0.011565 | -0.243 | -0.321 |  |  |  |                 |         |
| cg06283052 | 10 | 44,774,998  | 0.018645 | -0.243 | -0.220 |  |  |  |                 |         |
| cg09950423 | 16 | 49,856,768  | 0.010218 | -0.243 | -0.162 |  |  |  | <i>ZNF423</i>   | 5'UTR   |
| cg00468228 | 8  | 67,092,562  | 4.22E-07 | -0.243 | -0.226 |  |  |  |                 |         |
| cg26064142 | 5  | 152,867,989 | 1.25E-06 | -0.243 | -0.236 |  |  |  |                 |         |
| cg13928909 | 9  | 140,487,898 | 5.16E-11 | -0.243 | -0.240 |  |  |  |                 |         |
| cg21038780 | 5  | 167,780,864 | 1.41E-07 | -0.243 | -0.231 |  |  |  | <i>WWC1</i>     | Body    |
| cg07849052 | 7  | 50,445,456  | 0.021651 | -0.243 | -0.234 |  |  |  | <i>IKZF1</i>    | Body    |
| cg15595739 | 17 | 63,183,451  | 3.05E-06 | -0.243 | -0.192 |  |  |  | <i>RGS9</i>     | Body    |
| cg21810379 | 4  | 114,168,914 | 0.035705 | -0.244 | -0.079 |  |  |  | <i>ANK2</i>     | Body    |
| cg21997746 | 6  | 22,718,216  | 6.03E-10 | -0.244 | -0.216 |  |  |  |                 |         |

|            |    |             |          |        |        |            |        |  |                 |         |
|------------|----|-------------|----------|--------|--------|------------|--------|--|-----------------|---------|
| cg26035689 | 8  | 63,582,931  | 0.010528 | -0.244 | -0.257 |            |        |  | <i>NKAIN3</i>   | Body    |
| cg26746469 | 20 | 36,663,290  | 1.97E-05 | -0.244 | -0.263 |            |        |  | <i>KIAA0406</i> | TSS1500 |
| cg27461824 | 13 | 111,596,806 | 6.52E-05 | -0.244 | -0.155 |            |        |  |                 |         |
| cg16339097 | 3  | 82,293,457  | 0.005324 | -0.244 | -0.229 |            |        |  |                 |         |
| cg19371339 | 1  | 152,657,198 | 0.00153  | -0.244 | -0.251 |            |        |  | <i>LCE2B</i>    | TSS1500 |
| cg24277788 | 4  | 185,724,837 | 0.032957 | -0.244 | -0.211 |            |        |  | <i>ACSL1</i>    | 5'UTR   |
| cg25581330 | 4  | 186,434,993 | 4.19E-12 | -0.244 | -0.265 |            |        |  | <i>PDLIM3</i>   | Body    |
| cg03685774 | 1  | 159,870,326 | 1.55E-07 | -0.244 | -0.244 |            |        |  | <i>CCDC19</i>   | TSS1500 |
| cg21900069 | 3  | 99,408,767  | 0.001568 | -0.244 | -0.217 |            |        |  | <i>COL8A1</i>   | 5'UTR   |
| cg01833755 | 14 | 89,889,372  | 9.01E-07 | -0.244 | -0.234 |            |        |  | <i>FOXN3</i>    | 5'UTR   |
| cg02212575 | 3  | 156,838,403 | 2.02E-09 | -0.244 | -0.250 |            |        |  |                 |         |
| cg05157420 | 5  | 111,690,150 | 0.0001   | -0.244 | -0.177 |            |        |  | <i>EPB41L4A</i> | Body    |
| cg02068832 | 12 | 1,976,671   | 0.000651 | -0.244 | -0.189 |            |        |  | <i>CACNA2D4</i> | Body    |
| cg05067377 | 16 | 88,330,953  | 0.000954 | -0.244 | -0.154 |            |        |  |                 |         |
| cg10473367 | 16 | 1,309,550   | 6.31E-16 | -0.244 | -0.237 |            |        |  |                 |         |
| cg00624908 | 1  | 3,327,395   | 2.47E-10 | -0.244 | -0.240 |            |        |  | <i>PRDM16</i>   | Body    |
| cg02969500 | 14 | 33,767,024  | 0.009328 | -0.244 | -0.228 |            |        |  | <i>NPAS3</i>    | Body    |
| cg20311730 | 11 | 7,985,183   | 0.002978 | -0.244 | -0.228 | 3.45E-16   | -0.195 |  | <i>NLRP10</i>   | TSS200  |
| cg25943276 | 11 | 131,533,284 | 0.004397 | -0.244 | -0.148 | 0.00000799 | -0.110 |  | <i>NTM</i>      | Body    |
| cg06373377 | 1  | 43,825,745  | 0.000117 | -0.244 | -0.169 |            |        |  | <i>CDC20</i>    | Body    |
| cg25141766 | 17 | 79,826,316  | 3.74E-11 | -0.244 | -0.225 |            |        |  | <i>ARHGDI1</i>  | 3'UTR   |
| cg17736819 | 6  | 133,783,020 | 0.012907 | -0.244 | -0.184 |            |        |  | <i>EYA4</i>     | Body    |
| cg07790170 | 4  | 111,537,570 | 0.014551 | -0.244 | -0.126 |            |        |  |                 |         |
| cg14712983 | 1  | 12,184,541  | 5.26E-05 | -0.244 | -0.283 |            |        |  | <i>TNFRSF8</i>  | Body    |
| cg03299824 | 16 | 17,647,941  | 0.001201 | -0.244 | -0.171 |            |        |  |                 |         |
| cg09833701 | 11 | 1,959,051   | 0.000297 | -0.244 | -0.165 |            |        |  | <i>TNNT3</i>    | Body    |
| cg10782703 | 6  | 133,851,542 | 0.005138 | -0.244 | -0.223 |            |        |  | <i>EYA4</i>     | 3'UTR   |
| cg05316911 | 7  | 3,816,859   | 1.35E-07 | -0.244 | -0.245 |            |        |  | <i>SDK1</i>     | Body    |
| cg26446816 | 2  | 236,640,324 | 2.09E-06 | -0.244 | -0.182 |            |        |  | <i>AGAP1</i>    | Body    |
| cg08525712 | 16 | 30,413,324  | 4.75E-11 | -0.244 | -0.250 |            |        |  |                 |         |
| cg09819958 | 17 | 80,043,505  | 0.002029 | -0.244 | -0.162 |            |        |  | <i>FASN</i>     | Body    |
| cg20556704 | 2  | 84,105,889  | 0.047471 | -0.244 | -0.144 |            |        |  |                 |         |
| cg09730689 | 4  | 122,184,241 | 0.00755  | -0.244 | -0.250 |            |        |  |                 |         |
| cg19377421 | 1  | 156,697,041 | 1.53E-05 | -0.244 | -0.206 |            |        |  | <i>ISG20L2</i>  | 1stExon |

|            |    |             |          |        |        |            |        |  |                  |         |
|------------|----|-------------|----------|--------|--------|------------|--------|--|------------------|---------|
| cg11435943 | 18 | 61,222,687  | 0.019486 | -0.244 | -0.185 |            |        |  | <i>SERPINB12</i> | TSS1500 |
| cg17015522 | 17 | 77,044,488  | 0.009766 | -0.244 | -0.144 |            |        |  | <i>C1QTNF1</i>   | 3'UTR   |
| cg26842720 | 8  | 62,212,734  | 0.001321 | -0.244 | -0.227 |            |        |  | <i>CLVS1</i>     | Body    |
| cg16081499 | 12 | 129,000,862 | 0.00274  | -0.244 | -0.206 |            |        |  | <i>TMEM132C</i>  | Body    |
| cg06479057 | 3  | 112,358,468 | 0.005442 | -0.244 | -0.167 |            |        |  | <i>CCDC80</i>    | Body    |
| cg26811568 | 11 | 50,005,399  | 3.4E-05  | -0.244 | -0.227 |            |        |  | <i>OR4C12</i>    | TSS1500 |
| cg13629783 | 17 | 5,689,617   | 0.000959 | -0.244 | -0.178 |            |        |  |                  |         |
| cg24998981 | 18 | 77,441,810  | 3.69E-07 | -0.244 | -0.222 |            |        |  | <i>CTDP1</i>     | Body    |
| cg03609427 | 7  | 48,068,758  | 0.016946 | -0.244 | -0.182 |            |        |  | <i>SUNC1</i>     | TSS200  |
| cg24838240 | 19 | 14,721,367  | 0.010776 | -0.244 | -0.140 |            |        |  | <i>CLEC17A</i>   | 3'UTR   |
| cg04895001 | 11 | 6,805,701   | 0.000127 | -0.244 | -0.263 |            |        |  | <i>OR2AG1</i>    | TSS1500 |
| cg26137121 | 8  | 145,578,601 | 9.23E-08 | -0.244 | -0.227 |            |        |  | <i>C8ORFK29</i>  | TSS200  |
| cg26939283 | 1  | 152,731,117 | 0.01183  | -0.244 | -0.195 |            |        |  | <i>KPRP</i>      | 5'UTR   |
| cg02650512 | 17 | 27,048,975  | 5.55E-12 | -0.244 | -0.236 |            |        |  | <i>RPL23A</i>    | Body    |
| cg11154727 | 5  | 85,189,638  | 0.001268 | -0.244 | -0.175 |            |        |  |                  |         |
| cg17707493 | 17 | 42,222,405  | 2.69E-06 | -0.244 | -0.226 |            |        |  | <i>C17orf53</i>  | Body    |
| cg06738652 | 12 | 5,256,318   | 0.003926 | -0.244 | -0.137 |            |        |  |                  |         |
| cg12094863 | 6  | 164,092,588 | 0.002078 | -0.244 | -0.138 |            |        |  |                  |         |
| cg06873461 | 2  | 115,822,184 | 7.7E-05  | -0.244 | -0.200 |            |        |  | <i>DPP10</i>     | Body    |
| cg25249728 | 2  | 55,391,421  | 2.33E-08 | -0.244 | -0.249 |            |        |  |                  |         |
| cg04556550 | 7  | 72,982,668  | 0.000163 | -0.244 | -0.228 |            |        |  |                  |         |
| cg12542670 | 6  | 150,379,047 | 0.001013 | -0.244 | -0.191 |            |        |  |                  |         |
| cg13267619 | 3  | 36,812,001  | 0.011678 | -0.244 | -0.196 |            |        |  |                  |         |
| cg13757194 | 15 | 69,223,774  | 0.000127 | -0.244 | -0.258 |            |        |  | <i>MIR548H4</i>  | Body    |
| cg22730004 | 1  | 158,656,718 | 3.46E-10 | -0.245 | -0.255 | 0.00000237 | -0.138 |  | <i>SPTA1</i>     | TSS1500 |
| cg05702234 | 11 | 5,527,468   | 0.009778 | -0.245 | -0.220 |            |        |  |                  |         |
| cg06063171 | 11 | 190,242     | 6.56E-13 | -0.245 | -0.227 |            |        |  |                  |         |
| cg09583036 | 11 | 87,846,644  | 0.000158 | -0.245 | -0.185 |            |        |  | <i>RAB38</i>     | 3'UTR   |
| cg15602298 | 1  | 157,670,825 | 0.005528 | -0.245 | -0.295 |            |        |  | <i>FCRL3</i>     | TSS200  |
| cg06294384 | 16 | 18,057,597  | 0.022172 | -0.245 | -0.192 |            |        |  |                  |         |
| cg17499358 | 1  | 24,476,861  | 1.96E-14 | -0.245 | -0.224 |            |        |  |                  |         |
| cg02986924 | 2  | 55,200,201  | 6.66E-11 | -0.245 | -0.243 |            |        |  | <i>RTN4</i>      | 3'UTR   |
| cg06780861 | 14 | 83,683,592  | 0.001134 | -0.245 | -0.258 |            |        |  |                  |         |
| cg10419295 | 7  | 1,303,448   | 5.45E-05 | -0.245 | -0.248 |            |        |  |                  |         |

|            |    |             |          |        |        |            |        |     |                |         |
|------------|----|-------------|----------|--------|--------|------------|--------|-----|----------------|---------|
| cg00653041 | 7  | 122,524,465 | 9.01E-08 | -0.245 | -0.243 |            |        |     | <i>CADPS2</i>  | Body    |
| cg08650784 | 1  | 35,250,229  | 3.32E-07 | -0.245 | -0.228 |            |        |     | <i>GJB3</i>    | 5'UTR   |
| cg20068510 | 15 | 95,397,535  | 0.023061 | -0.245 | -0.199 |            |        |     |                |         |
| cg17373022 | 10 | 54,539,758  | 2.3E-08  | -0.245 | -0.230 |            |        |     |                |         |
| cg09522018 | 6  | 139,644,871 | 5.08E-09 | -0.245 | -0.252 |            |        |     |                |         |
| cg00454447 | 16 | 3,728,185   | 0.003298 | -0.245 | -0.133 |            |        |     | <i>TRAP1</i>   | Body    |
| cg02476374 | 16 | 1,204,932   | 0.044755 | -0.245 | -0.271 |            |        |     | <i>CACNA1H</i> | Body    |
| cg18553840 | 22 | 39,713,018  | 1.99E-08 | -0.245 | -0.233 |            |        |     | <i>RPL3</i>    | Body    |
| cg02796568 | 6  | 152,784,396 | 0.000281 | -0.245 | -0.190 |            |        |     | <i>SYNE1</i>   | Body    |
| cg06241374 | 2  | 56,410,071  | 0.000791 | -0.245 | -0.242 |            |        |     | <i>CCDC85A</i> | TSS1500 |
| cg24778538 | 12 | 14,131,975  | 0.01026  | -0.245 | -0.271 |            |        |     | <i>GRIN2B</i>  | 5'UTR   |
| cg26251098 | 11 | 131,319,616 | 0.008684 | -0.245 | -0.271 |            |        |     | <i>NTM</i>     | Body    |
| cg12447398 | 7  | 2,944,127   | 3.22E-05 | -0.245 | -0.218 |            |        |     |                |         |
| cg02721374 | 17 | 2,996,177   | 0.003679 | -0.245 | -0.171 | 0.00085345 | -0.093 |     | <i>OR1D2</i>   | 1stExon |
| cg15624274 | 7  | 46,754,068  | 2.78E-06 | -0.245 | -0.161 |            |        |     |                |         |
| cg11067224 | 1  | 152,780,139 | 0.000154 | -0.245 | -0.184 |            |        |     | <i>LCE1C</i>   | TSS1500 |
| cg22634633 | 7  | 48,044,273  | 3.81E-07 | -0.245 | -0.229 |            |        |     | <i>SUNC1</i>   | Body    |
| cg17609294 | 17 | 6,327,601   | 0.016183 | -0.245 | -0.124 |            |        |     | <i>AIPL1</i>   | 3'UTR   |
| cg06382546 | 2  | 141,039,361 | 0.003469 | -0.245 | -0.254 |            |        |     | <i>LRP1B</i>   | Body    |
| cg16432125 | 14 | 87,542,031  | 2.64E-05 | -0.245 | -0.250 |            |        |     |                |         |
| cg20057103 | 11 | 121,740,719 | 0.036929 | -0.245 | -0.196 |            |        |     |                |         |
| cg01962826 | 6  | 34,100,967  | 0.001036 | -0.245 | -0.180 |            |        |     | <i>GRM4</i>    | 1stExon |
| cg11800379 | 1  | 10,715,885  | 0.007426 | -0.245 | -0.133 |            |        |     | <i>CASZ1</i>   | Body    |
| cg15108326 | 12 | 133,381,454 | 0.01895  | -0.245 | -0.225 |            |        |     | <i>GOLGA3</i>  | Body    |
| cg01612158 | 1  | 157,567,720 | 2.49E-05 | -0.245 | -0.251 | 7.5E-08    | -0.137 |     | <i>FCRL4</i>   | 1stExon |
| cg23547411 | 12 | 84,990,914  | 0.001152 | -0.245 | -0.201 |            |        |     |                |         |
| cg08812937 | X  | 152,159,208 | 0.006776 | -0.245 | -0.116 |            |        |     | <i>PNMA5</i>   | Body    |
| cg00380428 | 17 | 77,463,587  | 0.009051 | -0.245 | -0.151 |            |        |     | <i>HRNBP3</i>  | 5'UTR   |
| cg01457572 | 8  | 72,456,434  | 0.011992 | -0.245 | -0.193 |            |        |     |                |         |
| cg07532183 | 8  | 120,684,968 | 0.003272 | -0.245 | -0.233 |            |        |     |                |         |
| cg03114253 | 1  | 158,122,905 | 0.007551 | -0.245 | -0.206 |            |        |     |                |         |
| cg03450107 | 1  | 41,980,863  | 0.00051  | -0.245 | -0.315 |            |        |     | <i>HIVEP3</i>  | Body    |
| cg12725323 | 1  | 152,768,727 | 0.016032 | -0.245 | -0.178 |            |        |     | <i>LCE1D</i>   | TSS1500 |
| cg01236166 | 16 | 59,390,195  | 0.000545 | -0.245 | -0.248 |            |        | Yes |                |         |

|            |    |             |          |        |        |  |  |  |                  |         |
|------------|----|-------------|----------|--------|--------|--|--|--|------------------|---------|
| cg10057614 | 16 | 56,841,060  | 2.97E-05 | -0.245 | -0.202 |  |  |  | <i>NUP93</i>     | Body    |
| cg03226435 | 1  | 3,058,199   | 0.003735 | -0.245 | -0.134 |  |  |  | <i>PRDM16</i>    | Body    |
| cg27475365 | 6  | 125,476,259 | 3.23E-09 | -0.245 | -0.234 |  |  |  | <i>TPD52L1</i>   | 5'UTR   |
| cg01357233 | 10 | 50,123,030  | 0.029147 | -0.245 | -0.141 |  |  |  | <i>LRRC18</i>    | TSS1500 |
| cg04418162 | 3  | 125,687,269 | 1.5E-07  | -0.245 | -0.240 |  |  |  | <i>ROPN1B</i>    | TSS1500 |
| cg00727777 | 8  | 2,337,813   | 0.019517 | -0.245 | -0.173 |  |  |  |                  |         |
| cg27227663 | 11 | 123,626,544 | 0.00087  | -0.245 | -0.221 |  |  |  | <i>OR6X1</i>     | TSS1500 |
| cg13027458 | 16 | 59,789,219  | 3.34E-07 | -0.245 | -0.210 |  |  |  | <i>LOC644649</i> | TSS200  |
| cg25188760 | 20 | 5,301,547   | 0.000543 | -0.245 | -0.225 |  |  |  |                  |         |
| cg06888270 | 1  | 238,053,972 | 0.014346 | -0.245 | -0.264 |  |  |  | <i>ZP4</i>       | TSS200  |
| cg09057080 | 16 | 837,441     | 5.43E-09 | -0.245 | -0.204 |  |  |  | <i>RPUSD1</i>    | Body    |
| cg18499396 | 3  | 191,680,064 | 0.009077 | -0.245 | -0.188 |  |  |  |                  |         |
| cg10026158 | 7  | 148,891,888 | 0.000783 | -0.245 | -0.210 |  |  |  | <i>ZNF282</i>    | TSS1500 |
| cg18710298 | 4  | 111,012,198 | 6.34E-10 | -0.245 | -0.259 |  |  |  | <i>ELOVL6</i>    | Body    |
| cg03398474 | 4  | 190,501,057 | 8.78E-06 | -0.245 | -0.219 |  |  |  |                  |         |
| cg15861835 | X  | 76,649,101  | 0.000112 | -0.245 | -0.226 |  |  |  |                  |         |
| cg19296305 | 4  | 109,030,040 | 1.15E-05 | -0.245 | -0.279 |  |  |  | <i>LEF1</i>      | Body    |
| cg04983349 | 6  | 80,381,447  | 2.15E-07 | -0.245 | -0.282 |  |  |  | <i>SH3BGRL2</i>  | Body    |
| cg09367092 | 22 | 43,254,168  | 3.47E-05 | -0.245 | -0.193 |  |  |  | <i>ARFGAP3</i>   | TSS1500 |
| cg23918388 | 1  | 207,991,593 | 5.43E-07 | -0.245 | -0.194 |  |  |  | <i>LOC148696</i> | TSS200  |
| cg01554149 | 16 | 86,285,923  | 0.011495 | -0.245 | -0.172 |  |  |  |                  |         |
| cg23609450 | 20 | 44,313,578  | 0.00667  | -0.245 | -0.149 |  |  |  | <i>WFDC10B</i>   | Body    |
| cg13624964 | 14 | 86,088,696  | 0.002519 | -0.245 | -0.154 |  |  |  | <i>FLRT2</i>     | Body    |
| cg15301694 | 14 | 31,496,854  | 1E-09    | -0.246 | -0.269 |  |  |  | <i>STRN3</i>     | TSS1500 |
| cg02314201 | 10 | 134,843,775 | 0.000629 | -0.246 | -0.199 |  |  |  |                  |         |
| cg26587228 | 19 | 57,641,846  | 0.000361 | -0.246 | -0.232 |  |  |  | <i>USP29</i>     | Body    |
| cg02010152 | 6  | 32,782,617  | 3.66E-05 | -0.246 | -0.176 |  |  |  | <i>HLA-DOB</i>   | Body    |
| cg10328538 | 10 | 9,445,611   | 0.007079 | -0.246 | -0.175 |  |  |  |                  |         |
| cg06829391 | 16 | 9,857,151   | 0.003488 | -0.246 | -0.203 |  |  |  | <i>GRIN2A</i>    | Body    |
| cg23287952 | 11 | 40,436,677  | 0.000398 | -0.246 | -0.204 |  |  |  |                  |         |
| cg12497304 | X  | 78,002,454  | 0.001155 | -0.246 | -0.208 |  |  |  | <i>LPAR4</i>     | TSS1500 |
| cg03804126 | 16 | 5,880,449   | 2.6E-07  | -0.246 | -0.221 |  |  |  |                  |         |
| cg15644639 | 8  | 125,538,941 | 8.45E-07 | -0.246 | -0.227 |  |  |  | <i>TATDN1</i>    | Body    |
| cg04640834 | 12 | 49,261,012  | 9.45E-09 | -0.246 | -0.231 |  |  |  | <i>RND1</i>      | TSS1500 |

|            |    |             |          |        |        |  |  |     |                     |         |
|------------|----|-------------|----------|--------|--------|--|--|-----|---------------------|---------|
| cg03718883 | 11 | 2,098,414   | 3.42E-07 | -0.246 | -0.226 |  |  |     |                     |         |
| cg09679746 | 16 | 61,960,656  | 0.004949 | -0.246 | -0.168 |  |  |     | <i>CDH8</i>         | Body    |
| cg05626376 | 6  | 31,938,847  | 3.76E-08 | -0.246 | -0.228 |  |  |     | <i>STK19</i>        | TSS200  |
| cg04554505 | 11 | 101,323,578 | 0.003397 | -0.246 | -0.255 |  |  |     | <i>TRPC6</i>        | 3'UTR   |
| cg27070902 | 11 | 44,750,083  | 7.94E-05 | -0.246 | -0.260 |  |  |     |                     |         |
| cg23350273 | 3  | 97,982,397  | 2.93E-08 | -0.246 | -0.235 |  |  |     | <i>OR5H6</i>        | TSS1500 |
| cg25541968 | 11 | 7,848,142   | 4.44E-05 | -0.246 | -0.202 |  |  |     | <i>OR5P3</i>        | TSS1500 |
| cg14833626 | 4  | 54,667,491  | 3.25E-07 | -0.246 | -0.240 |  |  |     |                     |         |
| cg09297225 | 4  | 56,656,788  | 0.011844 | -0.246 | -0.181 |  |  |     |                     |         |
| cg14652646 | 4  | 16,847,844  | 0.007875 | -0.246 | -0.179 |  |  |     | <i>LDB2</i>         | Body    |
| cg19652416 | 10 | 134,697,862 | 0.000113 | -0.246 | -0.155 |  |  |     |                     |         |
| cg00791406 | 12 | 14,118,880  | 0.001268 | -0.246 | -0.277 |  |  |     | <i>GRIN2B</i>       | 5'UTR   |
| cg11416605 | X  | 63,267,928  | 0.025607 | -0.246 | -0.179 |  |  |     |                     |         |
| cg02383368 | 19 | 7,684,468   | 6.13E-06 | -0.246 | -0.232 |  |  |     | <i>XAB2</i>         | 3'UTR   |
| cg16643706 | 5  | 111,289,503 | 0.002475 | -0.246 | -0.267 |  |  |     | <i>C5orf13</i>      | Body    |
| cg20981106 | 8  | 107,139,751 | 0.00152  | -0.246 | -0.214 |  |  |     |                     |         |
| cg16357179 | 7  | 56,562,731  | 0.016695 | -0.246 | -0.118 |  |  |     | <i>DKFZp434L192</i> | TSS1500 |
| cg04142010 | 11 | 103,905,296 | 0.009265 | -0.246 | -0.204 |  |  |     | <i>PDGFD</i>        | Body    |
| cg07387335 | 15 | 34,781,891  | 0.00011  | -0.246 | -0.172 |  |  |     |                     |         |
| cg04845236 | 9  | 104,294,981 | 3.68E-07 | -0.246 | -0.185 |  |  |     | <i>RNF20</i>        | TSS1500 |
| cg17946714 | 21 | 37,536,083  | 3.15E-07 | -0.246 | -0.238 |  |  |     | <i>DOPEY2</i>       | TSS1500 |
| cg12827946 | 3  | 66,513,559  | 2.85E-05 | -0.246 | -0.274 |  |  |     | <i>LRIG1</i>        | Body    |
| cg08170608 | 16 | 32,037,687  | 0.010195 | -0.246 | -0.173 |  |  |     |                     |         |
| cg21369801 | 17 | 80,202,961  | 0.010141 | -0.246 | -0.199 |  |  |     | <i>CSNK1D</i>       | Body    |
| cg04757081 | 10 | 65,424,432  | 0.027055 | -0.246 | -0.429 |  |  |     |                     |         |
| cg08382963 | 6  | 164,345,307 | 0.015    | -0.246 | -0.238 |  |  |     |                     |         |
| cg15844441 | 17 | 51,902,426  | 1.7E-05  | -0.246 | -0.229 |  |  |     | <i>KIF2B</i>        | 1stExon |
| cg05119754 | 15 | 69,853,722  | 1.26E-05 | -0.246 | -0.245 |  |  | Yes | <i>LOC145837</i>    | TSS1500 |
| cg06405820 | 16 | 86,951,397  | 0.006381 | -0.246 | -0.170 |  |  |     |                     |         |
| cg08080489 | 11 | 132,526,947 | 0.013638 | -0.246 | -0.293 |  |  |     | <i>OPCML</i>        | Body    |
| cg22668995 | 3  | 168,558,640 | 0.018294 | -0.246 | -0.177 |  |  |     |                     |         |
| cg26559703 | 10 | 26,853,625  | 0.012471 | -0.246 | -0.136 |  |  |     | <i>APBB1IP</i>      | Body    |
| cg18594701 | 11 | 55,111,658  | 3.52E-05 | -0.246 | -0.227 |  |  |     | <i>OR4A16</i>       | 1stExon |
| cg27143703 | 17 | 77,961,719  | 2.41E-07 | -0.246 | -0.259 |  |  |     | <i>TBC1D16</i>      | Body    |

|            |    |             |          |        |        |  |  |  |                  |         |
|------------|----|-------------|----------|--------|--------|--|--|--|------------------|---------|
| cg19419054 | 6  | 39,779,548  | 0.014257 | -0.246 | -0.150 |  |  |  | <i>DAAM2</i>     | 5'UTR   |
| cg12469902 | 5  | 4,230,546   | 0.02002  | -0.246 | -0.172 |  |  |  |                  |         |
| cg22227747 | 8  | 47,165,466  | 0.004569 | -0.246 | -0.133 |  |  |  |                  |         |
| cg08441248 | 7  | 48,495,215  | 0.006654 | -0.246 | -0.173 |  |  |  | <i>ABCA13</i>    | Body    |
| cg11493661 | 6  | 32,016,239  | 0.030836 | -0.246 | -0.065 |  |  |  | <i>TNXB</i>      | Body    |
| cg22188815 | 18 | 67,137,030  | 0.031105 | -0.246 | -0.168 |  |  |  | <i>DOK6</i>      | Body    |
| cg07195224 | 1  | 159,047,034 | 2.08E-05 | -0.246 | -0.260 |  |  |  | <i>AIM2</i>      | TSS1500 |
| cg10991752 | 6  | 155,845,314 | 0.000765 | -0.246 | -0.205 |  |  |  |                  |         |
| cg00813765 | X  | 134,846,987 | 2.54E-06 | -0.246 | -0.203 |  |  |  | <i>CT45A1</i>    | TSS200  |
| cg00692892 | X  | 150,861,833 | 0.034122 | -0.246 | -0.135 |  |  |  |                  |         |
| cg07717083 | 6  | 32,051,857  | 0.000457 | -0.246 | -0.170 |  |  |  | <i>TNXB</i>      | Body    |
| cg27527345 | 1  | 159,505,015 | 0.010383 | -0.246 | -0.182 |  |  |  | <i>OR10J5</i>    | 1stExon |
| cg17958291 | 7  | 121,519,375 | 1.17E-13 | -0.246 | -0.253 |  |  |  | <i>PTPRZ1</i>    | Body    |
| cg01892695 | X  | 99,893,802  | 2.56E-05 | -0.246 | -0.240 |  |  |  |                  |         |
| cg01550013 | 5  | 152,234,077 | 0.006124 | -0.246 | -0.173 |  |  |  |                  |         |
| cg22495211 | 7  | 56,514,965  | 7.24E-06 | -0.246 | -0.254 |  |  |  | <i>LOC650226</i> | Body    |
| cg00542261 | 10 | 71,121,415  | 8.46E-05 | -0.246 | -0.238 |  |  |  | <i>HK1</i>       | Body    |
| cg25549758 | X  | 70,435,082  | 4.53E-07 | -0.246 | -0.231 |  |  |  | <i>BCYRN1</i>    | Body    |
| cg16088380 | 13 | 114,750,991 | 1.91E-05 | -0.246 | -0.259 |  |  |  | <i>RASA3</i>     | Body    |
| cg21543102 | 1  | 152,974,771 | 0.039834 | -0.246 | -0.168 |  |  |  | <i>SPRR3</i>     | 5'UTR   |
| cg00733567 | 10 | 133,663,272 | 0.000105 | -0.246 | -0.160 |  |  |  |                  |         |
| cg03066050 | 9  | 110,249,749 | 0.017476 | -0.246 | -0.145 |  |  |  | <i>KLF4</i>      | Body    |
| cg06955716 | 14 | 69,867,830  | 1.88E-06 | -0.246 | -0.206 |  |  |  | <i>SLC39A9</i>   | Body    |
| cg26959384 | 19 | 57,272,621  | 0.003688 | -0.246 | -0.182 |  |  |  |                  |         |
| cg13525397 | 6  | 31,025,933  | 2.84E-05 | -0.246 | -0.166 |  |  |  | <i>HCG22</i>     | Body    |
| cg16465407 | 7  | 9,673,790   | 0.030464 | -0.247 | -0.225 |  |  |  | <i>PER4</i>      | TSS200  |
| cg26283136 | X  | 150,944,987 | 0.002033 | -0.247 | -0.226 |  |  |  |                  |         |
| cg01055462 | 12 | 21,590,246  | 3.76E-05 | -0.247 | -0.200 |  |  |  | <i>PYROXD1</i>   | TSS1500 |
| cg14758163 | 5  | 84,943,636  | 0.000467 | -0.247 | -0.209 |  |  |  |                  |         |
| cg10976626 | 1  | 158,322,841 | 0.020675 | -0.247 | -0.146 |  |  |  | <i>CD1E</i>      | TSS1500 |
| cg13191008 | 11 | 4,629,912   | 1.11E-05 | -0.247 | -0.239 |  |  |  | <i>TRIM68</i>    | TSS1500 |
| cg23818921 | 4  | 76,871,621  | 1.84E-08 | -0.247 | -0.246 |  |  |  | <i>SDAD1</i>     | 3'UTR   |
| cg26432459 | 5  | 172,279,819 | 2.32E-06 | -0.247 | -0.238 |  |  |  | <i>ERGIC1</i>    | Body    |
| cg09932955 | 12 | 131,184,892 | 0.045628 | -0.247 | -0.134 |  |  |  |                  |         |

|            |    |             |          |        |        |           |        |  |                  |         |
|------------|----|-------------|----------|--------|--------|-----------|--------|--|------------------|---------|
| cg15963070 | 2  | 80,341,377  | 0.000306 | -0.247 | -0.224 |           |        |  | <i>CTNNA2</i>    | Body    |
| cg04505023 | 1  | 152,956,186 | 0.010042 | -0.247 | -0.174 | 0.0036949 | -0.062 |  | <i>SPRR1A</i>    | TSS1500 |
| cg06417385 | 10 | 11,847,111  | 0.000561 | -0.247 | -0.208 |           |        |  |                  |         |
| cg13195526 | 12 | 68,647,498  | 1.54E-07 | -0.247 | -0.215 |           |        |  | <i>IL22</i>      | TSS1500 |
| cg16123421 | 10 | 134,473,552 | 0.037457 | -0.247 | -0.243 |           |        |  | <i>INPP5A</i>    | Body    |
| cg20611453 | 10 | 26,877,515  | 0.005883 | -0.247 | -0.162 |           |        |  | <i>C10orf50</i>  | TSS1500 |
| cg21109025 | 17 | 32,580,869  | 0.012309 | -0.247 | -0.182 | 6.49E-10  | -0.157 |  | <i>CCL2</i>      | TSS1500 |
| cg25157408 | 20 | 7,921,059   | 0.000224 | -0.247 | -0.202 | 7.57E-07  | -0.154 |  | <i>HAO1</i>      | 1stExon |
| cg18321073 | 5  | 12,795,705  | 0.006557 | -0.247 | -0.190 |           |        |  |                  |         |
| cg25525825 | 6  | 28,889,919  | 7.34E-05 | -0.247 | -0.164 |           |        |  | <i>TRIM27</i>    | Body    |
| cg03129645 | 7  | 141,947,898 | 0.029907 | -0.247 | -0.257 |           |        |  | <i>MOXD2</i>     | TSS1500 |
| cg00051662 | 10 | 96,521,086  | 0.001141 | -0.247 | -0.283 |           |        |  | <i>CYP2C19</i>   | TSS1500 |
| cg02930348 | 20 | 59,968,939  | 0.026667 | -0.247 | -0.067 |           |        |  | <i>CDH4</i>      | Body    |
| cg05663891 | 19 | 22,233,809  | 0.031722 | -0.247 | -0.130 |           |        |  | <i>ZNF257</i>    | TSS1500 |
| cg11504078 | 1  | 240,761,363 | 2.82E-10 | -0.247 | -0.227 |           |        |  | <i>GREM2</i>     | 5'UTR   |
| cg07045460 | 1  | 3,194,247   | 0.003833 | -0.247 | -0.125 |           |        |  | <i>PRDM16</i>    | Body    |
| cg11472951 | 8  | 112,347,457 | 0.002159 | -0.247 | -0.207 |           |        |  |                  |         |
| cg14768519 | 17 | 79,870,056  | 0.000429 | -0.247 | -0.159 |           |        |  | <i>SIRT7</i>     | 3'UTR   |
| cg15102821 | 1  | 1,844,801   | 4.79E-07 | -0.247 | -0.218 |           |        |  | <i>CALML6</i>    | TSS1500 |
| cg04157194 | 17 | 21,832,408  | 0.040059 | -0.247 | -0.131 |           |        |  |                  |         |
| cg26959913 | 11 | 88,073,722  | 6.15E-05 | -0.247 | -0.249 |           |        |  |                  |         |
| cg20555040 | 5  | 110,404,682 | 0.000735 | -0.247 | -0.206 |           |        |  |                  |         |
| cg26245202 | 1  | 205,602,864 | 0.00035  | -0.247 | -0.163 | 4.28E-07  | -0.097 |  | <i>ELK4</i>      | TSS1500 |
| cg03670736 | 12 | 13,748,224  | 0.004951 | -0.247 | -0.305 |           |        |  | <i>GRIN2B</i>    | Body    |
| cg06331700 | 13 | 22,661,121  | 0.023687 | -0.247 | -0.238 |           |        |  |                  |         |
| cg13474262 | 1  | 5,137,221   | 0.020092 | -0.247 | -0.119 |           |        |  |                  |         |
| cg11344572 | 1  | 10,702,712  | 0.0124   | -0.247 | -0.152 |           |        |  | <i>CASZ1</i>     | Body    |
| cg07687131 | 12 | 93,967,580  | 0.000199 | -0.247 | -0.153 |           |        |  | <i>SOCS2</i>     | Body    |
| cg05321594 | 8  | 330,175     | 1.14E-09 | -0.247 | -0.263 |           |        |  |                  |         |
| cg19274341 | 1  | 8,143,891   | 0.000319 | -0.247 | -0.249 |           |        |  |                  |         |
| cg15735954 | 19 | 54,972,723  | 4.05E-07 | -0.247 | -0.213 |           |        |  | <i>LENG8</i>     | 3'UTR   |
| cg07479492 | 16 | 10,483,353  | 0.002628 | -0.247 | -0.340 |           |        |  |                  |         |
| cg05852824 | 15 | 26,543,817  | 4.47E-06 | -0.247 | -0.236 |           |        |  |                  |         |
| cg08641706 | 2  | 105,069,200 | 0.004287 | -0.247 | -0.200 |           |        |  | <i>LOC150568</i> | Body    |



|            |    |             |          |        |        |  |  |  |                  |         |
|------------|----|-------------|----------|--------|--------|--|--|--|------------------|---------|
| cg19615295 | 20 | 58,570,200  | 0.001045 | -0.247 | -0.255 |  |  |  | <i>CDH26</i>     | Body    |
| cg24694502 | 1  | 4,736,187   | 0.0185   | -0.247 | -0.110 |  |  |  | <i>AJAP1</i>     | Body    |
| cg15618210 | 11 | 132,816,803 | 0.043647 | -0.247 | -0.313 |  |  |  | <i>OPCML</i>     | Body    |
| cg06481517 | 2  | 49,084,769  | 3.82E-05 | -0.247 | -0.265 |  |  |  |                  |         |
| cg13508949 | 4  | 166,131,313 | 6.76E-06 | -0.247 | -0.246 |  |  |  | <i>KLHL2</i>     | 1stExon |
| cg17157198 | 7  | 50,367,171  | 0.021804 | -0.247 | -0.119 |  |  |  | <i>IKZF1</i>     | Body    |
| cg01876288 | 7  | 158,800,934 | 3.41E-08 | -0.247 | -0.232 |  |  |  | <i>LOC154822</i> | TSS200  |
| cg11532725 | 2  | 56,407,143  | 7.64E-07 | -0.247 | -0.191 |  |  |  |                  |         |
| cg09611226 | 16 | 85,672,056  | 0.003707 | -0.247 | -0.153 |  |  |  | <i>KIAA0182</i>  | 5'UTR   |
| cg22806934 | 11 | 122,577,359 | 0.030078 | -0.247 | -0.144 |  |  |  | <i>UBASH3B</i>   | Body    |
| cg25918833 | 11 | 4,718,962   | 0.011399 | -0.247 | -0.182 |  |  |  | <i>OR51E2</i>    | 1stExon |
| cg16560137 | 14 | 104,565,926 | 0.003358 | -0.247 | -0.214 |  |  |  | <i>ASPG</i>      | Body    |
| cg10338848 | 16 | 7,701,595   | 0.011607 | -0.247 | -0.166 |  |  |  | <i>A2BP1</i>     | Body    |
| cg15687395 | 5  | 79,379,309  | 1.24E-07 | -0.247 | -0.234 |  |  |  |                  |         |
| cg18219713 | 8  | 50,837,079  | 0.001783 | -0.247 | -0.188 |  |  |  | <i>SNTG1</i>     | 5'UTR   |
| cg24481882 | 6  | 136,450,701 | 1.49E-07 | -0.247 | -0.242 |  |  |  | <i>PDE7B</i>     | Body    |
| cg16786274 | 13 | 102,865,555 | 0.043507 | -0.247 | -0.170 |  |  |  | <i>FGF14</i>     | Body    |
| cg14666310 | 19 | 42,211,479  | 1.15E-05 | -0.247 | -0.155 |  |  |  | <i>CEACAM5</i>   | TSS1500 |
| cg15568376 | 19 | 8,808,271   | 4.31E-06 | -0.247 | -0.198 |  |  |  | <i>ACTL9</i>     | 1stExon |
| cg25174601 | 22 | 49,847,690  | 0.023053 | -0.247 | -0.119 |  |  |  |                  |         |
| cg27036066 | 10 | 108,053,805 | 0.000439 | -0.247 | -0.211 |  |  |  |                  |         |
| cg27277183 | 12 | 121,688,441 | 0.014106 | -0.247 | -0.131 |  |  |  | <i>CAMKK2</i>    | Body    |
| cg10639029 | 5  | 151,946,019 | 0.006187 | -0.247 | -0.209 |  |  |  |                  |         |
| cg22719992 | 11 | 105,261,210 | 0.022952 | -0.247 | -0.191 |  |  |  |                  |         |
| cg23703633 | 10 | 62,135,541  | 0.000456 | -0.247 | -0.237 |  |  |  | <i>ANK3</i>      | Body    |
| cg11085294 | 1  | 177,057,631 | 0.00973  | -0.247 | -0.270 |  |  |  | <i>ASTN1</i>     | Body    |
| cg05949889 | 11 | 106,336,898 | 0.024687 | -0.247 | -0.262 |  |  |  |                  |         |
| cg20771846 | 17 | 1,372,516   | 0.028561 | -0.248 | -0.155 |  |  |  | <i>MYO1C</i>     | Body    |
| cg21679468 | 6  | 127,785,332 | 2.87E-07 | -0.248 | -0.204 |  |  |  | <i>C6orf174</i>  | 3'UTR   |
| cg02783529 | 6  | 3,762,185   | 2.76E-08 | -0.248 | -0.223 |  |  |  |                  |         |
| cg16408815 | 1  | 157,610,088 | 7.42E-06 | -0.248 | -0.226 |  |  |  |                  |         |
| cg16521605 | 19 | 46,363,340  | 5.46E-05 | -0.248 | -0.214 |  |  |  | <i>SYMPK</i>     | 5'UTR   |
| cg12044923 | 4  | 5,207,312   | 4.18E-14 | -0.248 | -0.241 |  |  |  | <i>STK32B</i>    | Body    |
| cg05357750 | 6  | 106,344,938 | 1.06E-05 | -0.248 | -0.270 |  |  |  |                  |         |

|            |    |             |          |        |        |            |        |  |                 |         |
|------------|----|-------------|----------|--------|--------|------------|--------|--|-----------------|---------|
| cg07882007 | 12 | 48,359,998  | 0.000264 | -0.248 | -0.241 |            |        |  | <i>TMEM106C</i> | Body    |
| cg10043313 | 16 | 32,212,399  | 0.001146 | -0.248 | -0.176 |            |        |  |                 |         |
| cg07617814 | 20 | 52,198,164  | 0.000544 | -0.248 | -0.305 |            |        |  | <i>ZNF217</i>   | 1stExon |
| cg26170133 | 8  | 49,959,180  | 0.016113 | -0.248 | -0.192 |            |        |  |                 |         |
| cg00321555 | 10 | 6,779,875   | 0.019105 | -0.248 | -0.214 |            |        |  |                 |         |
| cg06143658 | 2  | 233,878,015 | 0.000261 | -0.248 | -0.209 |            |        |  | <i>NGEF</i>     | TSS200  |
| cg07092233 | 6  | 152,795,102 | 0.001706 | -0.248 | -0.148 |            |        |  | <i>SYNE1</i>    | Body    |
| cg14171418 | 14 | 83,272,320  | 6.8E-05  | -0.248 | -0.255 |            |        |  |                 |         |
| cg00967316 | 7  | 113,558,794 | 0.000856 | -0.248 | -0.224 | 0.00056338 | -0.124 |  | <i>PPP1R3A</i>  | 1stExon |
| cg06742678 | 4  | 158,478,835 | 0.006871 | -0.248 | -0.176 |            |        |  |                 |         |
| cg07157333 | 16 | 19,422,554  | 6.57E-08 | -0.248 | -0.293 |            |        |  | <i>TMC5</i>     | 5'UTR   |
| cg09331780 | X  | 84,364,419  | 0.003833 | -0.248 | -0.250 |            |        |  | <i>SATL1</i>    | TSS1500 |
| cg17028658 | 4  | 186,321,177 | 1.92E-08 | -0.248 | -0.201 |            |        |  | <i>UFSP2</i>    | 3'UTR   |
| cg19423081 | 17 | 79,057,830  | 0.017611 | -0.248 | -0.072 |            |        |  | <i>BAIAP2</i>   | Body    |
| cg24914139 | 4  | 174,962,548 | 5.48E-06 | -0.248 | -0.250 |            |        |  |                 |         |
| cg26501046 | 2  | 218,466,307 | 0.00049  | -0.248 | -0.244 |            |        |  | <i>DIRC3</i>    | Body    |
| cg03487269 | 4  | 74,813,739  | 7.82E-06 | -0.248 | -0.249 |            |        |  |                 |         |
| cg03629497 | 8  | 114,440,908 | 8.13E-05 | -0.248 | -0.225 |            |        |  | <i>CSMD3</i>    | Body    |
| cg25408620 | 7  | 56,173,166  | 1.44E-09 | -0.248 | -0.235 |            |        |  | <i>CHCHD2</i>   | Body    |
| cg06583549 | 19 | 46,387,962  | 8.94E-07 | -0.248 | -0.217 |            |        |  | <i>IRF2BP1</i>  | 1stExon |
| cg02359025 | 16 | 86,950,827  | 0.049297 | -0.248 | -0.123 |            |        |  |                 |         |
| cg05138768 | 12 | 127,207,919 | 0.019989 | -0.248 | -0.172 |            |        |  |                 |         |
| cg22596806 | 1  | 241,517,815 | 2.79E-06 | -0.248 | -0.243 |            |        |  | <i>RGS7</i>     | Body    |
| cg00061678 | 1  | 170,776,719 | 0.014205 | -0.248 | -0.150 |            |        |  |                 |         |
| cg15932610 | 12 | 108,820,116 | 0.002172 | -0.248 | -0.236 |            |        |  |                 |         |
| cg12640653 | 5  | 168,183,115 | 9.38E-07 | -0.248 | -0.209 |            |        |  | <i>SLIT3</i>    | Body    |
| cg12716083 | 6  | 30,559,087  | 8.1E-17  | -0.248 | -0.229 |            |        |  | <i>ABCF1</i>    | 3'UTR   |
| cg24042452 | 1  | 156,305,664 | 2.51E-11 | -0.248 | -0.239 | 3.63E-19   | -0.150 |  | <i>CCT3</i>     | Body    |
| cg00773653 | 14 | 73,147,151  | 0.013599 | -0.248 | -0.246 |            |        |  | <i>DPF3</i>     | Body    |
| cg15536401 | 7  | 119,831,208 | 0.005997 | -0.248 | -0.293 |            |        |  |                 |         |
| cg17834650 | Y  | 9,214,205   | 0.004537 | -0.248 | -0.182 |            |        |  | <i>FAM197Y2</i> | TSS1500 |
| cg06803821 | 16 | 50,533,237  | 0.006441 | -0.248 | -0.196 |            |        |  |                 |         |
| cg16231678 | 4  | 155,056,918 | 0.04832  | -0.248 | -0.123 |            |        |  |                 |         |
| cg20307598 | 12 | 88,220,906  | 0.005241 | -0.248 | -0.240 |            |        |  |                 |         |

|            |    |             |          |        |        |  |     |  |                  |         |
|------------|----|-------------|----------|--------|--------|--|-----|--|------------------|---------|
| cg13844500 | 11 | 123,495,493 | 0.040655 | -0.248 | -0.228 |  |     |  |                  |         |
| cg26875135 | 7  | 1,221,192   | 1.74E-13 | -0.248 | -0.229 |  |     |  |                  |         |
| cg11208222 | 5  | 7,852,098   | 7.47E-08 | -0.248 | -0.244 |  |     |  | <i>C5orf49</i>   | TSS1500 |
| cg14571539 | 5  | 128,746,622 | 0.000145 | -0.248 | -0.171 |  |     |  |                  |         |
| cg05957546 | 11 | 7,819,874   | 1.77E-05 | -0.248 | -0.242 |  |     |  | <i>OR5P2</i>     | TSS1500 |
| cg08404739 | 16 | 48,269,424  | 2.41E-05 | -0.248 | -0.209 |  |     |  | <i>ABCC11</i>    | TSS1500 |
| cg00273543 | 13 | 103,055,487 | 0.010755 | -0.248 | -0.162 |  |     |  | <i>FGF14</i>     | TSS1500 |
| cg07092145 | 8  | 118,369,910 | 0.00164  | -0.248 | -0.202 |  |     |  |                  |         |
| cg08708231 | 11 | 132,992,485 | 0.003834 | -0.248 | -0.116 |  |     |  | <i>OPCML</i>     | Body    |
| cg16510350 | 4  | 112,477,798 | 0.000859 | -0.248 | -0.219 |  |     |  |                  |         |
| cg14850784 | 16 | 1,430,103   | 9.26E-06 | -0.248 | -0.276 |  |     |  | <i>UNKL</i>      | TSS1500 |
| cg20456954 | 8  | 68,178,729  | 1.78E-06 | -0.248 | -0.312 |  |     |  | <i>ARFGEF1</i>   | Body    |
| cg14794866 | 10 | 31,772,744  | 1.32E-08 | -0.248 | -0.262 |  |     |  | <i>ZEB1</i>      | Body    |
| cg01236299 | 17 | 9,819,556   | 0.000973 | -0.248 | -0.185 |  |     |  | <i>GAS7</i>      | 3'UTR   |
| cg01079872 | 1  | 3,302,477   | 0.007506 | -0.248 | -0.184 |  |     |  | <i>PRDM16</i>    | Body    |
| cg01216589 | 14 | 43,723,010  | 0.004886 | -0.248 | -0.148 |  |     |  |                  |         |
| cg00099427 | 1  | 159,870,134 | 4.65E-14 | -0.248 | -0.226 |  |     |  | <i>CCDC19</i>    | TSS1500 |
| cg04380873 | 3  | 184,089,743 | 5.24E-05 | -0.248 | -0.205 |  |     |  |                  |         |
| cg20083442 | 8  | 73,600,575  | 0.000196 | -0.248 | -0.269 |  |     |  | <i>KCNB2</i>     | Body    |
| cg10274606 | 14 | 73,118,334  | 0.002266 | -0.248 | -0.228 |  |     |  |                  |         |
| cg23432301 | X  | 55,650,979  | 2.31E-05 | -0.248 | -0.215 |  |     |  | <i>FOXR2</i>     | 1stExon |
| cg02066813 | 7  | 57,247,707  | 0.037267 | -0.248 | -0.178 |  | Yes |  | <i>LOC642006</i> | Body    |
| cg03080493 | 2  | 175,867,700 | 0.000135 | -0.248 | -0.202 |  |     |  | <i>CHN1</i>      | Body    |
| cg08755736 | 8  | 95,957,928  | 4.36E-11 | -0.248 | -0.252 |  |     |  | <i>TP53INP1</i>  | 5'UTR   |
| cg13851744 | 9  | 140,092,222 | 1.83E-09 | -0.248 | -0.241 |  |     |  | <i>C9orf75</i>   | Body    |
| cg07879681 | 13 | 112,336,027 | 0.007668 | -0.248 | -0.096 |  |     |  |                  |         |
| cg08247289 | 13 | 113,400,754 | 0.023632 | -0.248 | -0.391 |  |     |  | <i>ATP11A</i>    | Body    |
| cg08642716 | 1  | 3,213,431   | 3.04E-05 | -0.248 | -0.187 |  |     |  | <i>PRDM16</i>    | Body    |
| cg26545913 | 6  | 66,819,090  | 0.028272 | -0.248 | -0.273 |  |     |  |                  |         |
| cg00790672 | 1  | 3,324,671   | 4.34E-06 | -0.248 | -0.247 |  | Yes |  | <i>PRDM16</i>    | Body    |
| cg21211551 | 8  | 91,108,620  | 0.000223 | -0.248 | -0.222 |  |     |  |                  |         |
| cg07851374 | 13 | 76,723,380  | 0.000458 | -0.248 | -0.199 |  |     |  |                  |         |
| cg00035630 | 11 | 33,036,664  | 0.003208 | -0.248 | -0.296 |  |     |  | <i>DEPDC7</i>    | TSS1500 |
| cg00193859 | 7  | 139,723,923 | 1.08E-10 | -0.248 | -0.243 |  |     |  | <i>PARP12</i>    | 3'UTR   |

|            |    |             |          |        |        |  |  |     |                  |         |
|------------|----|-------------|----------|--------|--------|--|--|-----|------------------|---------|
| cg02947418 | 16 | 59,789,071  | 0.003671 | -0.248 | -0.137 |  |  |     | <i>LOC644649</i> | Body    |
| cg03092482 | 17 | 77,949,135  | 0.002746 | -0.248 | -0.163 |  |  |     | <i>TBC1D16</i>   | Body    |
| cg10624914 | 13 | 114,103,477 | 1.39E-06 | -0.249 | -0.173 |  |  |     | <i>ADPRHL1</i>   | Body    |
| cg13332571 | 22 | 50,923,890  | 0.00422  | -0.249 | -0.123 |  |  |     | <i>ADM2</i>      | 3'UTR   |
| cg19693031 | 1  | 145,441,552 | 0.001915 | -0.249 | -0.221 |  |  |     | <i>TXNIP</i>     | 3'UTR   |
| cg18865080 | 11 | 21,263,031  | 0.013661 | -0.249 | -0.274 |  |  |     | <i>NELL1</i>     | Body    |
| cg20474924 | 7  | 89,843,258  | 9.27E-08 | -0.249 | -0.254 |  |  |     | <i>STEAP2</i>    | 5'UTR   |
| cg06437862 | 13 | 19,756,096  | 0.006706 | -0.249 | -0.172 |  |  |     | <i>TUBA3C</i>    | TSS200  |
| cg08843850 | 1  | 199,092,823 | 0.010596 | -0.249 | -0.185 |  |  |     |                  |         |
| cg11863380 | 5  | 95,094,981  | 2.83E-08 | -0.249 | -0.257 |  |  |     | <i>RHOBTB3</i>   | Body    |
| cg20449074 | 7  | 10,658,637  | 8.18E-08 | -0.249 | -0.240 |  |  | Yes |                  |         |
| cg19790884 | 22 | 50,025,306  | 0.003016 | -0.249 | -0.167 |  |  |     | <i>C22orf34</i>  | Body    |
| cg13103485 | 7  | 94,536,651  | 1.41E-07 | -0.249 | -0.203 |  |  |     | <i>PPP1R9A</i>   | TSS1500 |
| cg00017842 | 2  | 119,528,421 | 0.000735 | -0.249 | -0.296 |  |  |     |                  |         |
| cg25247122 | 13 | 112,652,556 | 0.041137 | -0.249 | -0.075 |  |  |     |                  |         |
| cg04399632 | 16 | 11,837,547  | 3.2E-10  | -0.249 | -0.251 |  |  |     | <i>TXNDC11</i>   | TSS1500 |
| cg25050951 | 15 | 30,115,147  | 7.03E-14 | -0.249 | -0.246 |  |  |     | <i>TJP1</i>      | TSS1500 |
| cg24836679 | 19 | 56,017,564  | 0.001663 | -0.249 | -0.161 |  |  |     | <i>SSC5D</i>     | Body    |
| cg24268663 | X  | 151,560,719 | 0.005866 | -0.249 | -0.183 |  |  |     | <i>GABRA3</i>    | 5'UTR   |
| cg26629715 | 8  | 89,379,430  | 0.000213 | -0.249 | -0.229 |  |  | Yes |                  |         |
| cg05616589 | 6  | 55,298,362  | 6.71E-06 | -0.249 | -0.273 |  |  |     |                  |         |
| cg01068621 | 1  | 159,061,369 | 0.022689 | -0.249 | -0.174 |  |  |     |                  |         |
| cg21205855 | 8  | 61,563,866  | 4.59E-23 | -0.249 | -0.262 |  |  |     |                  |         |
| cg18912847 | 20 | 57,616,897  | 2.32E-08 | -0.249 | -0.283 |  |  |     | <i>SLMO2</i>     | Body    |
| cg22821358 | 1  | 198,828,005 | 0.016533 | -0.249 | -0.154 |  |  |     | <i>MIR181B1</i>  | Body    |
| cg17025555 | 1  | 158,724,362 | 0.012588 | -0.249 | -0.175 |  |  |     | <i>OR6K6</i>     | TSS1500 |
| cg10190334 | 6  | 73,935,676  | 1.45E-05 | -0.249 | -0.216 |  |  | Yes | <i>KHDC1L</i>    | TSS1500 |
| cg15961007 | 6  | 153,023,279 | 6.79E-08 | -0.249 | -0.245 |  |  |     | <i>MYCT1</i>     | Body    |
| cg01517188 | 14 | 57,127,077  | 4.05E-07 | -0.249 | -0.270 |  |  | Yes |                  |         |
| cg27178401 | 16 | 10,652,711  | 3.16E-10 | -0.249 | -0.253 |  |  |     | <i>EMP2</i>      | 5'UTR   |
| cg13170174 | 4  | 130,700,964 | 2.36E-05 | -0.249 | -0.192 |  |  |     |                  |         |
| cg10173620 | 15 | 89,658,904  | 2.54E-11 | -0.249 | -0.249 |  |  |     | <i>ABHD2</i>     | 5'UTR   |
| cg09394608 | 13 | 47,472,429  | 0.00774  | -0.249 | -0.243 |  |  |     | <i>HTR2A</i>     | TSS1500 |
| cg22032283 | 13 | 111,936,044 | 0.01798  | -0.249 | -0.231 |  |  |     | <i>ARHGEF7</i>   | Body    |

|            |    |             |          |        |        |          |        |  |                  |         |
|------------|----|-------------|----------|--------|--------|----------|--------|--|------------------|---------|
| cg13563869 | 1  | 104,635,600 | 0.002288 | -0.249 | -0.220 |          |        |  |                  |         |
| cg20492034 | 7  | 6,313,058   | 2.04E-09 | -0.249 | -0.233 |          |        |  | <i>CYTH3</i>     | TSS1500 |
| cg26738880 | 7  | 154,429,032 | 0.023092 | -0.249 | -0.144 | 2.46E-07 | -0.178 |  | <i>DPP6</i>      | Body    |
| cg00948085 | 7  | 25,890,572  | 1.73E-06 | -0.249 | -0.256 |          |        |  |                  |         |
| cg23655160 | 10 | 134,912,411 | 6.63E-05 | -0.249 | -0.234 |          |        |  | <i>GPR123</i>    | Body    |
| cg09141623 | 10 | 53,143,287  | 0.016867 | -0.249 | -0.138 |          |        |  | <i>PRKG1</i>     | Body    |
| cg10399946 | 6  | 33,242,016  | 2.18E-11 | -0.249 | -0.218 |          |        |  | <i>RPS18</i>     | Body    |
| cg03025880 | 4  | 100,572,172 | 0.000535 | -0.249 | -0.241 |          |        |  |                  |         |
| cg10958087 | 5  | 130,310,961 | 3.22E-10 | -0.249 | -0.247 |          |        |  |                  |         |
| cg20813374 | 6  | 35,657,180  | 2.46E-16 | -0.249 | -0.240 |          |        |  | <i>FKBP5</i>     | 5'UTR   |
| cg22764535 | 2  | 242,833,494 | 4.23E-05 | -0.249 | -0.234 |          |        |  |                  |         |
| cg27179810 | 1  | 1,226,776   | 8.1E-10  | -0.249 | -0.233 |          |        |  | <i>SCNN1D</i>    | Body    |
| cg00416882 | 18 | 44,495,671  | 0.002138 | -0.249 | -0.242 |          |        |  | <i>PIAS2</i>     | Body    |
| cg16896313 | 15 | 58,552,619  | 0.001882 | -0.249 | -0.156 |          |        |  |                  |         |
| cg12456973 | 6  | 31,938,744  | 1.91E-07 | -0.249 | -0.247 |          |        |  | <i>STK19</i>     | TSS1500 |
| cg15065561 | 19 | 22,319,196  | 0.018305 | -0.249 | -0.143 |          |        |  |                  |         |
| cg12527110 | 4  | 163,907,607 | 0.000558 | -0.249 | -0.279 |          |        |  |                  |         |
| cg01990257 | 8  | 33,847,504  | 0.000189 | -0.249 | -0.192 |          |        |  |                  |         |
| cg20524452 | 4  | 37,604,480  | 0.000103 | -0.249 | -0.187 |          |        |  | <i>RELL1</i>     | 3'UTR   |
| cg00471857 | 7  | 154,000,016 | 0.019549 | -0.249 | -0.154 |          |        |  | <i>DPP6</i>      | Body    |
| cg23751110 | 4  | 19,197,380  | 8.13E-07 | -0.249 | -0.245 |          |        |  |                  |         |
| cg14244493 | 9  | 137,515,845 | 0.012937 | -0.249 | -0.086 |          |        |  |                  |         |
| cg04910662 | 16 | 73,083,014  | 9.22E-10 | -0.249 | -0.240 |          |        |  | <i>ZFH3</i>      | 5'UTR   |
| cg03928812 | 11 | 59,634,276  | 2.04E-08 | -0.249 | -0.260 |          |        |  | <i>TCN1</i>      | TSS1500 |
| cg08657671 | 5  | 175,608,441 | 0.001717 | -0.249 | -0.138 |          |        |  |                  |         |
| cg18594467 | 3  | 1,809,617   | 0.006863 | -0.249 | -0.151 |          |        |  |                  |         |
| cg06419732 | 1  | 205,498,530 | 0.000138 | -0.249 | -0.189 |          |        |  | <i>CDK18</i>     | Body    |
| cg03468468 | 4  | 144,834,574 | 0.000231 | -0.249 | -0.178 |          |        |  |                  |         |
| cg15331945 | 12 | 34,756,042  | 1.07E-06 | -0.249 | -0.252 |          |        |  |                  |         |
| cg25503804 | 11 | 46,739,832  | 7.75E-10 | -0.249 | -0.258 |          |        |  | <i>F2</i>        | TSS1500 |
| cg13496793 | 9  | 129,645,969 | 0.000885 | -0.249 | -0.229 |          |        |  | <i>ZBTB34</i>    | 3'UTR   |
| cg23621149 | 10 | 6,824,325   | 0.015745 | -0.249 | -0.132 |          |        |  |                  |         |
| cg16885235 | 13 | 107,853,066 | 0.000231 | -0.249 | -0.228 |          |        |  | <i>FAM155A</i>   | Body    |
| cg18236862 | 12 | 131,651,239 | 0.024832 | -0.249 | -0.166 |          |        |  | <i>LOC116437</i> | Body    |

|            |    |             |          |        |        |  |  |     |                  |         |
|------------|----|-------------|----------|--------|--------|--|--|-----|------------------|---------|
| cg21411781 | 3  | 131,984,709 | 1.8E-08  | -0.249 | -0.307 |  |  |     |                  |         |
| cg22103414 | 8  | 6,638,082   | 8.38E-06 | -0.250 | -0.229 |  |  |     |                  |         |
| cg25360518 | 12 | 4,554,623   | 0.004764 | -0.250 | -0.153 |  |  |     | <i>FGF6</i>      | 1stExon |
| cg02092807 | 20 | 56,239,706  | 7.33E-05 | -0.250 | -0.272 |  |  |     | <i>PMEPA1</i>    | 5'UTR   |
| cg16764177 | 6  | 164,252,644 | 0.003795 | -0.250 | -0.174 |  |  |     |                  |         |
| cg15563205 | 6  | 30,300,013  | 2.62E-09 | -0.250 | -0.242 |  |  |     | <i>TRIM39</i>    | Body    |
| cg18049164 | 5  | 110,407,157 | 0.000756 | -0.250 | -0.169 |  |  |     | <i>TSLP</i>      | TSS1500 |
| cg13319761 | 11 | 48,509,778  | 0.01286  | -0.250 | -0.152 |  |  | Yes | <i>OR4A47</i>    | TSS1500 |
| cg08235349 | 18 | 5,198,566   | 0.007782 | -0.250 | -0.244 |  |  |     | <i>LOC642597</i> | TSS1500 |
| cg02943456 | 8  | 33,866,594  | 2.29E-05 | -0.250 | -0.207 |  |  |     |                  |         |
| cg27519145 | 1  | 166,039,635 | 0.002019 | -0.250 | -0.236 |  |  |     | <i>FAM78B</i>    | Body    |
| cg15126897 | 1  | 192,155,550 | 0.000572 | -0.250 | -0.220 |  |  |     |                  |         |
| cg07785444 | 19 | 45,664,665  | 4.03E-05 | -0.250 | -0.303 |  |  |     | <i>NKPD1</i>     | TSS1500 |
| cg10534479 | 5  | 166,198,692 | 0.010278 | -0.250 | -0.198 |  |  |     |                  |         |
| cg12656160 | 4  | 155,407,855 | 0.002179 | -0.250 | -0.168 |  |  | Yes | <i>DCHS2</i>     | Body    |
| cg01034312 | 4  | 89,510,112  | 3.56E-06 | -0.250 | -0.205 |  |  |     |                  |         |
| cg13323553 | 7  | 63,018,494  | 0.000171 | -0.250 | -0.199 |  |  |     |                  |         |
| cg15774334 | 2  | 209,854,267 | 3.78E-08 | -0.250 | -0.271 |  |  |     |                  |         |
| cg01351787 | 14 | 20,664,021  | 8.2E-09  | -0.250 | -0.205 |  |  |     | <i>OR11G2</i>    | TSS1500 |
| cg09149672 | 1  | 158,261,151 | 0.025547 | -0.250 | -0.145 |  |  |     | <i>CD1C</i>      | Body    |
| cg00206542 | 11 | 59,210,965  | 0.026551 | -0.250 | -0.222 |  |  |     | <i>OR5A1</i>     | 1stExon |
| cg09197443 | Y  | 14,107,195  | 0.001371 | -0.250 | -0.163 |  |  |     |                  |         |
| cg10806811 | 14 | 25,451,658  | 1.89E-08 | -0.250 | -0.223 |  |  |     | <i>STXBP6</i>    | 5'UTR   |
| cg01777433 | 5  | 57,875,838  | 2.25E-05 | -0.250 | -0.233 |  |  |     |                  |         |
| cg11649665 | 12 | 34,464,939  | 0.047264 | -0.250 | -0.153 |  |  |     |                  |         |
| cg12397981 | 15 | 101,814,046 | 5.01E-06 | -0.250 | -0.216 |  |  |     | <i>SELS</i>      | Body    |
| cg20213166 | 11 | 6,191,635   | 0.001122 | -0.250 | -0.265 |  |  |     | <i>OR52B2</i>    | TSS200  |
| cg27326683 | 13 | 87,732,923  | 0.02429  | -0.250 | -0.123 |  |  |     |                  |         |
| cg03734750 | 4  | 17,040,881  | 0.017777 | -0.250 | -0.177 |  |  |     |                  |         |
| cg21805734 | 1  | 166,124,736 | 0.001877 | -0.250 | -0.302 |  |  | Yes | <i>MIR921</i>    | TSS1500 |
| cg02388453 | 15 | 37,084,662  | 0.011045 | -0.250 | -0.311 |  |  |     | <i>C15orf41</i>  | Body    |
| cg08286791 | 2  | 80,412,398  | 7E-05    | -0.250 | -0.252 |  |  |     | <i>CTNNA2</i>    | Body    |
| cg27644733 | 16 | 9,857,216   | 0.036272 | -0.250 | -0.223 |  |  |     | <i>GRIN2A</i>    | Body    |
| cg15922513 | 12 | 131,561,251 | 0.004692 | -0.250 | -0.163 |  |  |     | <i>GPR133</i>    | Body    |

|            |    |             |          |        |        |           |        |  |                  |         |
|------------|----|-------------|----------|--------|--------|-----------|--------|--|------------------|---------|
| cg23240465 | 1  | 42,610,907  | 2.73E-06 | -0.250 | -0.277 |           |        |  |                  |         |
| cg03035657 | 16 | 51,873,539  | 0.011173 | -0.250 | -0.249 |           |        |  |                  |         |
| cg01473816 | 11 | 34,535,281  | 0.012489 | -0.250 | -0.280 | 0.0000134 | -0.105 |  | <i>ELF5</i>      | 1stExon |
| cg07834418 | 10 | 107,409,739 | 0.007742 | -0.250 | -0.281 |           |        |  |                  |         |
| cg22624391 | 11 | 1,937,457   | 0.001372 | -0.250 | -0.221 |           |        |  |                  |         |
| cg03544379 | 19 | 15,052,824  | 0.00382  | -0.250 | -0.180 | 9.97E-07  | -0.121 |  | <i>OR7C2</i>     | 1stExon |
| cg13796211 | 10 | 6,407,932   | 1.08E-05 | -0.250 | -0.266 |           |        |  |                  |         |
| cg04398180 | 13 | 114,103,452 | 4.28E-06 | -0.250 | -0.159 |           |        |  | <i>ADPRHL1</i>   | 1stExon |
| cg07639783 | 7  | 1,610,747   | 0.002085 | -0.250 | -0.333 |           |        |  | <i>PSMG3</i>     | TSS1500 |
| cg24463066 | 4  | 48,377,724  | 3.08E-08 | -0.250 | -0.250 |           |        |  | <i>SLAIN2</i>    | Body    |
| cg17367472 | 21 | 32,254,161  | 0.015307 | -0.250 | -0.146 |           |        |  | <i>KRTAP11-1</i> | TSS1500 |
| cg02595851 | 2  | 119,132,095 | 9.44E-05 | -0.250 | -0.294 |           |        |  |                  |         |
| cg20182232 | 3  | 118,865,365 | 1.66E-05 | -0.250 | -0.229 |           |        |  | <i>C3orf30</i>   | 1stExon |
| cg02576892 | 1  | 2,878,813   | 0.015014 | -0.250 | -0.114 |           |        |  |                  |         |
| cg15010903 | 17 | 76,850,256  | 1.36E-09 | -0.250 | -0.243 |           |        |  | <i>TIMP2</i>     | 3'UTR   |
| cg19370451 | 1  | 152,386,561 | 0.015196 | -0.250 | -0.222 | 1.65E-09  | -0.117 |  | <i>CRNN</i>      | 5'UTR   |
| cg25775109 | 19 | 5,823,786   | 0.028879 | -0.250 | -0.176 |           |        |  | <i>NRTN</i>      | TSS200  |
| cg00407820 | 6  | 150,182,095 | 1.81E-07 | -0.250 | -0.240 |           |        |  | <i>LRP11</i>     | Body    |
| cg03244438 | 6  | 112,139,510 | 0.000465 | -0.250 | -0.236 |           |        |  | <i>FYN</i>       | 5'UTR   |
| cg20712955 | 8  | 106,810,999 | 0.036599 | -0.250 | -0.257 |           |        |  | <i>ZFPM2</i>     | Body    |
| cg10243004 | 2  | 128,616,167 | 0.001206 | -0.250 | -0.230 |           |        |  | <i>POLR2D</i>    | TSS1500 |
| cg16589705 | 8  | 80,226,364  | 0.001767 | -0.250 | -0.231 |           |        |  |                  |         |
| cg07658681 | 10 | 73,553,201  | 0.001519 | -0.250 | -0.154 |           |        |  | <i>CDH23</i>     | Body    |
| cg12497692 | 19 | 36,203,089  | 1.47E-06 | -0.250 | -0.217 | 2.23E-26  | -0.222 |  | <i>ZBTB32</i>    | TSS1500 |
| cg27611699 | 3  | 193,189,809 | 0.000416 | -0.250 | -0.147 |           |        |  | <i>ATP13A4</i>   | Body    |
| cg03549618 | 14 | 35,838,977  | 3.19E-13 | -0.250 | -0.245 |           |        |  |                  |         |
| cg15227682 | 17 | 37,843,264  | 7.69E-07 | -0.250 | -0.247 |           |        |  | <i>ERBB2</i>     | TSS1500 |
| cg00589791 | 5  | 30,429,329  | 0.000842 | -0.250 | -0.243 |           |        |  |                  |         |
| cg00658367 | 4  | 101,732,612 | 2E-05    | -0.250 | -0.250 |           |        |  |                  |         |
| cg15392549 | 6  | 104,216,442 | 8.09E-06 | -0.250 | -0.204 |           |        |  |                  |         |
| cg14462830 | 6  | 123,959,184 | 0.029645 | -0.250 | -0.169 | 9.91E-07  | -0.155 |  | <i>TRDN</i>      | TSS1500 |
| cg19290091 | 4  | 27,321,334  | 8.54E-12 | -0.250 | -0.240 |           |        |  |                  |         |
| cg27527503 | 4  | 108,909,664 | 6.38E-07 | -0.250 | -0.232 |           |        |  | <i>HADH</i>      | TSS1500 |
| cg00639218 | Y  | 14,096,487  | 1.26E-06 | -0.250 | -0.208 |           |        |  |                  |         |

|            |    |             |          |        |        |  |  |  |                |         |
|------------|----|-------------|----------|--------|--------|--|--|--|----------------|---------|
| cg01455398 | 17 | 77,200,481  | 1.45E-05 | -0.250 | -0.213 |  |  |  | <i>HRNBP3</i>  | 5'UTR   |
| cg27526774 | 1  | 235,099,089 | 1.01E-09 | -0.250 | -0.272 |  |  |  |                |         |
| cg02491905 | 2  | 10,975,305  | 6.44E-12 | -0.250 | -0.244 |  |  |  |                |         |
| cg09579605 | 8  | 144,681,482 | 0.000328 | -0.250 | -0.224 |  |  |  | <i>TIGD5</i>   | 1stExon |
| cg11808874 | 2  | 70,529,494  | 4.3E-08  | -0.250 | -0.234 |  |  |  | <i>FAM136A</i> | TSS1500 |
| cg16466270 | 4  | 122,305,076 | 0.006439 | -0.250 | -0.199 |  |  |  |                |         |
| cg06798887 | 16 | 17,898,759  | 0.015024 | -0.250 | -0.161 |  |  |  |                |         |
| cg07128890 | 11 | 59,807,164  | 0.000197 | -0.250 | -0.267 |  |  |  | <i>PLAC1L</i>  | TSS1500 |
| cg07706367 | 4  | 3,342,725   | 2.27E-08 | -0.250 | -0.235 |  |  |  | <i>RGS12</i>   | Body    |
| cg04335523 | 10 | 53,790,078  | 0.004657 | -0.250 | -0.187 |  |  |  | <i>PRKG1</i>   | Body    |
| cg10324825 | 1  | 158,153,227 | 0.002211 | -0.250 | -0.213 |  |  |  | <i>CD1D</i>    | Body    |
| cg21652803 | 8  | 58,256,341  | 8.8E-09  | -0.250 | -0.226 |  |  |  |                |         |
| cg25204186 | 17 | 31,889,590  | 1.45E-09 | -0.250 | -0.178 |  |  |  | <i>ACCN1</i>   | Body    |
| cg01116831 | 16 | 2,190,356   | 1.4E-07  | -0.250 | -0.279 |  |  |  |                |         |
| cg14797295 | 7  | 93,641,451  | 5.56E-05 | -0.250 | -0.230 |  |  |  |                |         |
| cg19666225 | 12 | 17,972,332  | 0.000862 | -0.251 | -0.193 |  |  |  |                |         |
| cg26721868 | 19 | 4,567,641   | 6.84E-07 | -0.251 | -0.213 |  |  |  |                |         |
| cg04693329 | 11 | 123,995,045 | 0.001526 | -0.251 | -0.296 |  |  |  | <i>VWA5A</i>   | Body    |
| cg06547203 | 16 | 15,154,082  | 3.85E-09 | -0.251 | -0.253 |  |  |  | <i>RRN3</i>    | 3'UTR   |
| cg00580715 | 10 | 133,508,590 | 0.015238 | -0.251 | -0.110 |  |  |  |                |         |
| cg01413522 | 16 | 86,519,105  | 1.26E-05 | -0.251 | -0.231 |  |  |  |                |         |
| cg26659572 | 11 | 22,569,243  | 0.00955  | -0.251 | -0.212 |  |  |  |                |         |
| cg01634213 | 5  | 176,982,179 | 1.78E-05 | -0.251 | -0.186 |  |  |  | <i>FAM193B</i> | TSS1500 |
| cg01958906 | 14 | 86,705,163  | 0.026588 | -0.251 | -0.168 |  |  |  |                |         |
| cg04354077 | 20 | 5,295,137   | 8.45E-05 | -0.251 | -0.206 |  |  |  | <i>PROKR2</i>  | TSS200  |
| cg08920032 | 15 | 99,332,004  | 9.8E-09  | -0.251 | -0.253 |  |  |  | <i>IGF1R</i>   | Body    |
| cg12428378 | 1  | 153,280,070 | 0.006881 | -0.251 | -0.168 |  |  |  | <i>PGLYRP3</i> | Body    |
| cg20979153 | 20 | 52,199,748  | 2.5E-06  | -0.251 | -0.252 |  |  |  | <i>ZNF217</i>  | TSS200  |
| cg13679311 | 11 | 55,889,808  | 0.000217 | -0.251 | -0.218 |  |  |  | <i>OR8H3</i>   | TSS200  |
| cg03918703 | 14 | 23,888,450  | 2.03E-05 | -0.251 | -0.201 |  |  |  | <i>MIR208B</i> | TSS1500 |
| cg10069736 | 13 | 102,929,516 | 0.009185 | -0.251 | -0.241 |  |  |  | <i>FGF14</i>   | Body    |
| cg23897083 | 12 | 34,755,568  | 5.6E-07  | -0.251 | -0.250 |  |  |  |                |         |
| cg16284674 | 10 | 135,123,337 | 1.54E-06 | -0.251 | -0.247 |  |  |  | <i>ZNF511</i>  | Body    |
| cg21311798 | X  | 13,703,900  | 3.11E-05 | -0.251 | -0.319 |  |  |  |                |         |



|            |    |             |          |        |        |  |  |  |                 |         |
|------------|----|-------------|----------|--------|--------|--|--|--|-----------------|---------|
| cg22016870 | 2  | 237,980,832 | 0.010769 | -0.251 | -0.086 |  |  |  |                 |         |
| cg22202381 | 13 | 102,103,051 | 0.00717  | -0.251 | -0.133 |  |  |  |                 |         |
| cg14462402 | 11 | 120,678,447 | 7.47E-18 | -0.251 | -0.220 |  |  |  | <i>GRIK4</i>    | Body    |
| cg06746492 | 2  | 167,344,555 | 3.31E-06 | -0.251 | -0.201 |  |  |  | <i>SCN7A</i>    | TSS1500 |
| cg10210510 | 1  | 40,771,135  | 5.4E-07  | -0.251 | -0.265 |  |  |  | <i>COL9A2</i>   | Body    |
| cg21810373 | 11 | 70,917,159  | 1.85E-06 | -0.251 | -0.257 |  |  |  | <i>SHANK2</i>   | 5'UTR   |
| cg18356170 | 7  | 25,065,912  | 0.000694 | -0.251 | -0.177 |  |  |  |                 |         |
| cg11281110 | 13 | 112,335,776 | 0.030549 | -0.251 | -0.056 |  |  |  |                 |         |
| cg02622846 | 11 | 88,096,346  | 1.84E-05 | -0.251 | -0.221 |  |  |  |                 |         |
| cg01071367 | 2  | 97,174,391  | 2.97E-05 | -0.251 | -0.181 |  |  |  | <i>NEURL3</i>   | TSS1500 |
| cg15651267 | 5  | 167,028,535 | 0.002033 | -0.251 | -0.306 |  |  |  | <i>ODZ2</i>     | Body    |
| cg06524192 | 16 | 7,615,568   | 0.009484 | -0.251 | -0.145 |  |  |  | <i>A2BP1</i>    | Body    |
| cg16338011 | 3  | 137,301,727 | 0.011538 | -0.251 | -0.316 |  |  |  |                 |         |
| cg24591082 | 6  | 56,143,542  | 0.003313 | -0.251 | -0.219 |  |  |  |                 |         |
| cg01882058 | 16 | 86,465,884  | 0.001401 | -0.251 | -0.174 |  |  |  |                 |         |
| cg09187549 | 1  | 170,456,527 | 0.005689 | -0.251 | -0.215 |  |  |  |                 |         |
| cg02161203 | 22 | 50,008,841  | 0.000741 | -0.251 | -0.156 |  |  |  |                 |         |
| cg03466428 | 4  | 165,628,435 | 0.001567 | -0.251 | -0.233 |  |  |  |                 |         |
| cg01649867 | 4  | 155,056,878 | 0.025095 | -0.251 | -0.132 |  |  |  |                 |         |
| cg03018162 | 8  | 137,807,457 | 0.004635 | -0.251 | -0.185 |  |  |  |                 |         |
| cg11913917 | X  | 104,463,622 | 0.012379 | -0.251 | -0.222 |  |  |  | <i>TEX13A</i>   | 3'UTR   |
| cg13856643 | 2  | 238,500,389 | 6.92E-14 | -0.251 | -0.224 |  |  |  | <i>RAB17</i>    | TSS1500 |
| cg26350373 | 15 | 42,449,015  | 3.17E-06 | -0.251 | -0.227 |  |  |  | <i>PLA2G4F</i>  | TSS200  |
| cg24520479 | 4  | 163,906,031 | 0.003243 | -0.251 | -0.247 |  |  |  |                 |         |
| cg00625845 | 7  | 97,841,502  | 0.016061 | -0.251 | -0.113 |  |  |  | <i>BHLHA15</i>  | TSS200  |
| cg16928393 | 3  | 109,033,890 | 0.033461 | -0.251 | -0.162 |  |  |  | <i>DPPA2</i>    | 5'UTR   |
| cg10920297 | 11 | 94,803,188  | 4.95E-10 | -0.251 | -0.217 |  |  |  | <i>SFRS2B</i>   | 1stExon |
| cg16712155 | 11 | 6,007,249   | 0.03121  | -0.251 | -0.119 |  |  |  | <i>OR52L1</i>   | 1stExon |
| cg00724015 | 2  | 119,145,086 | 9.9E-06  | -0.251 | -0.269 |  |  |  |                 |         |
| cg15554338 | 3  | 167,190,158 | 0.002526 | -0.251 | -0.168 |  |  |  | <i>SERPINI2</i> | 5'UTR   |
| cg07185041 | 6  | 31,845,721  | 1.26E-08 | -0.251 | -0.246 |  |  |  | <i>SLC44A4</i>  | Body    |
| cg13548810 | 1  | 55,349,365  | 0.002641 | -0.251 | -0.192 |  |  |  | <i>DHCR24</i>   | Body    |
| cg21197905 | 11 | 111,602,136 | 1.09E-05 | -0.251 | -0.223 |  |  |  | <i>PPP2R1B</i>  | Body    |
| cg06469214 | 10 | 134,898,381 | 0.003697 | -0.251 | -0.173 |  |  |  |                 |         |

|            |    |             |          |        |        |            |        |     |                 |         |
|------------|----|-------------|----------|--------|--------|------------|--------|-----|-----------------|---------|
| cg13123165 | 11 | 122,106,236 | 0.005045 | -0.251 | -0.246 |            |        |     |                 |         |
| cg21419383 | 1  | 152,881,930 | 0.046706 | -0.251 | -0.123 |            |        |     | <i>IVL</i>      | 5'UTR   |
| cg06892501 | 11 | 5,345,105   | 0.026015 | -0.251 | -0.190 |            |        |     | <i>OR51B2</i>   | 1stExon |
| cg05391892 | 2  | 208,795,620 | 1.56E-06 | -0.251 | -0.251 |            |        |     | <i>PLEKHM3</i>  | Body    |
| cg26404952 | X  | 146,343,575 | 2.9E-06  | -0.251 | -0.234 |            |        |     | <i>MIR509-2</i> | TSS1500 |
| cg03717755 | 6  | 16,136,539  | 0.000621 | -0.251 | -0.189 |            |        |     | <i>MYLIP</i>    | Body    |
| cg14971418 | 10 | 133,806,912 | 5.94E-08 | -0.251 | -0.280 |            |        |     |                 |         |
| cg16777106 | 4  | 158,281,194 | 0.004849 | -0.251 | -0.169 |            |        |     | <i>GRIA2</i>    | Body    |
| cg18172829 | 5  | 4,590,292   | 0.006056 | -0.251 | -0.163 |            |        |     |                 |         |
| cg23801782 | 18 | 66,471,057  | 0.033354 | -0.251 | -0.146 |            |        |     | <i>CCDC102B</i> | 5'UTR   |
| cg06159296 | 11 | 92,150,122  | 0.012986 | -0.251 | -0.283 |            |        |     | <i>FAT3</i>     | Body    |
| cg17940268 | 1  | 166,124,106 | 0.000494 | -0.251 | -0.275 |            |        |     | <i>MIR921</i>   | TSS200  |
| cg21137501 | 14 | 106,892,303 | 5.02E-07 | -0.251 | -0.191 |            |        |     |                 |         |
| cg01067062 | 17 | 48,195,695  | 3.05E-05 | -0.251 | -0.226 |            |        |     | <i>SAMD14</i>   | Body    |
| cg15818577 | 17 | 80,040,107  | 0.001613 | -0.251 | -0.144 |            |        |     | <i>FASN</i>     | Body    |
| cg08879886 | 8  | 5,909,880   | 0.015307 | -0.251 | -0.183 |            |        |     |                 |         |
| cg25974831 | 20 | 30,028,223  | 0.046685 | -0.251 | -0.140 |            |        |     | <i>DEFB123</i>  | TSS200  |
| cg03180042 | 4  | 69,681,824  | 2.81E-07 | -0.251 | -0.245 |            |        |     | <i>UGT2B10</i>  | 1stExon |
| cg08667786 | 16 | 8,995,677   | 0.000349 | -0.251 | -0.221 |            |        |     | <i>USP7</i>     | Body    |
| cg00601648 | 8  | 131,974,587 | 0.00065  | -0.252 | -0.266 |            |        |     | <i>ADCY8</i>    | Body    |
| cg11875995 | 8  | 123,587,744 | 0.000295 | -0.252 | -0.173 |            |        | Yes |                 |         |
| cg24860589 | 11 | 129,941,906 | 0.000487 | -0.252 | -0.253 |            |        |     | <i>APLP2</i>    | Body    |
| cg09712962 | 2  | 48,946,375  | 0.009759 | -0.252 | -0.196 |            |        |     | <i>GTF2A1L</i>  | Body    |
| cg13320538 | 8  | 2,419,822   | 0.002233 | -0.252 | -0.280 |            |        |     |                 |         |
| cg11871280 | 12 | 60,082,038  | 0.008648 | -0.252 | -0.127 | 0.00010095 | -0.136 |     | <i>SLC16A7</i>  | TSS1500 |
| cg22790986 | 11 | 123,757,153 | 0.010822 | -0.252 | -0.186 |            |        |     | <i>TMEM225</i>  | TSS1500 |
| cg23502204 | 11 | 87,905,295  | 0.017365 | -0.252 | -0.150 |            |        |     | <i>RAB38</i>    | Body    |
| cg02499535 | 6  | 132,531,419 | 0.005621 | -0.252 | -0.202 |            |        | Yes |                 |         |
| cg11311332 | 7  | 131,433,049 | 3.68E-05 | -0.252 | -0.237 |            |        |     |                 |         |
| cg09681386 | 2  | 74,053,699  | 1.16E-05 | -0.252 | -0.212 |            |        |     |                 |         |
| cg25616535 | 17 | 47,294,967  | 9.74E-06 | -0.252 | -0.170 |            |        |     | <i>ABI3</i>     | Body    |
| cg27189481 | 3  | 192,710,593 | 0.03219  | -0.252 | -0.179 |            |        |     |                 |         |
| cg00015699 | 12 | 90,313,589  | 0.016204 | -0.252 | -0.147 |            |        |     |                 |         |
| cg16159925 | X  | 139,866,657 | 0.046602 | -0.252 | -0.244 |            |        |     | <i>CDR1</i>     | 5'UTR   |

|             |    |             |          |        |        |          |        |     |                  |         |
|-------------|----|-------------|----------|--------|--------|----------|--------|-----|------------------|---------|
| cg22360146  | 1  | 115,301,208 | 7.23E-06 | -0.252 | -0.174 |          |        |     | <i>CSDE1</i>     | TSS1500 |
| cg27069588  | X  | 145,078,289 | 0.015527 | -0.252 | -0.252 |          |        |     | <i>MIR892A</i>   | TSS200  |
| cg19255722  | 3  | 38,762,483  | 0.029358 | -0.252 | -0.196 |          |        |     | <i>SCN10A</i>    | Body    |
| cg12301619  | 1  | 110,676,840 | 3.12E-07 | -0.252 | -0.244 |          |        |     |                  |         |
| cg22374268  | 11 | 105,011,637 | 0.024547 | -0.252 | -0.162 |          |        |     | <i>CARD18</i>    | TSS1500 |
| cg08013890  | 12 | 66,965,641  | 5.49E-07 | -0.252 | -0.215 |          |        |     | <i>GRIP1</i>     | Body    |
| cg14691364  | 7  | 126,165,242 | 0.004351 | -0.252 | -0.156 |          |        |     | <i>GRM8</i>      | Body    |
| cg21916461  | 11 | 68,148,079  | 4.43E-12 | -0.252 | -0.222 |          |        |     | <i>LRP5</i>      | Body    |
| cg27553638  | X  | 140,786,627 | 0.004466 | -0.252 | -0.179 |          |        |     | <i>SPANXD</i>    | TSS200  |
| cg02021789  | 19 | 15,162,515  | 4.05E-06 | -0.252 | -0.204 |          |        |     | <i>CASP14</i>    | TSS1500 |
| cg16709904  | 16 | 86,379,417  | 0.02869  | -0.252 | -0.112 |          |        |     | <i>LOC732275</i> | TSS200  |
| cg20542190  | 19 | 54,850,619  | 0.000158 | -0.252 | -0.200 | 1.24E-11 | -0.126 |     | <i>LILRA4</i>    | TSS200  |
| cg05099240  | 13 | 19,756,038  | 0.043187 | -0.252 | -0.098 |          |        | Yes | <i>TUBA3C</i>    | TSS200  |
| cg23154270  | 2  | 137,527,566 | 1.34E-05 | -0.252 | -0.215 |          |        |     |                  |         |
| cg06639538  | 11 | 133,373,892 | 0.010425 | -0.252 | -0.155 |          |        |     | <i>OPCML</i>     | Body    |
| cg15626881  | 7  | 33,923,464  | 3.8E-17  | -0.252 | -0.253 |          |        |     |                  |         |
| cg05173058  | 15 | 93,573,245  | 3.77E-18 | -0.252 | -0.253 |          |        |     |                  |         |
| cg04741880  | 19 | 51,362,954  | 2.71E-19 | -0.252 | -0.229 |          |        |     | <i>KLK3</i>      | Body    |
| cg25669593  | 6  | 168,811,263 | 0.000162 | -0.252 | -0.227 |          |        |     |                  |         |
| cg111129772 | 7  | 53,879,728  | 0.000814 | -0.252 | -0.232 |          |        |     |                  |         |
| cg11173246  | 11 | 841,376     | 2.66E-05 | -0.252 | -0.196 | 3.26E-11 | -0.125 |     | <i>TSPAN4</i>    | TSS1500 |
| cg01561758  | 19 | 52,514,445  | 0.003986 | -0.252 | -0.245 |          |        |     |                  |         |
| cg02499925  | 17 | 3,031,618   | 0.000921 | -0.252 | -0.205 |          |        |     | <i>OR1G1</i>     | TSS1500 |
| cg01509330  | 6  | 170,535,724 | 7.78E-06 | -0.252 | -0.247 |          |        |     |                  |         |
| cg17484699  | 4  | 77,507,651  | 3.06E-07 | -0.252 | -0.238 |          |        |     | <i>SHROOM3</i>   | Body    |
| cg00535683  | 1  | 153,114,002 | 0.01959  | -0.252 | -0.190 |          |        |     | <i>SPRR2C</i>    | TSS200  |
| cg01449674  | 10 | 31,531,682  | 0.002893 | -0.252 | -0.267 |          |        |     |                  |         |
| cg01760434  | 16 | 34,204,266  | 0.035521 | -0.252 | -0.102 |          |        | Yes |                  |         |
| cg07429192  | 5  | 9,918,811   | 0.004407 | -0.252 | -0.246 |          |        |     |                  |         |
| cg13193591  | 11 | 120,377,997 | 9.24E-10 | -0.252 | -0.255 |          |        |     |                  |         |
| cg02160083  | 2  | 49,089,947  | 0.000425 | -0.252 | -0.261 |          |        |     |                  |         |
| cg26380116  | 12 | 125,927,452 | 0.001335 | -0.252 | -0.291 |          |        |     | <i>TMEM132B</i>  | Body    |
| cg06353345  | 11 | 5,322,976   | 0.01745  | -0.252 | -0.280 | 2.98E-08 | -0.195 |     | <i>OR51B4</i>    | 1stExon |
| cg17526887  | 2  | 223,918,000 | 0.001409 | -0.252 | -0.189 |          |        |     | <i>KCNE4</i>     | Body    |

|            |    |             |          |        |        |          |        |     |                  |         |
|------------|----|-------------|----------|--------|--------|----------|--------|-----|------------------|---------|
| cg13032902 | 12 | 131,863,570 | 0.026993 | -0.252 | -0.130 |          |        |     |                  |         |
| cg16556696 | 1  | 74,445,461  | 0.008409 | -0.252 | -0.221 |          |        |     |                  |         |
| cg22971920 | X  | 153,199,588 | 3.83E-08 | -0.252 | -0.209 |          |        |     | <i>NAA10</i>     | Body    |
| cg19982893 | 11 | 20,188,331  | 0.000307 | -0.252 | -0.243 |          |        |     |                  |         |
| cg21221557 | 5  | 83,639,995  | 0.000104 | -0.252 | -0.217 |          |        |     | <i>EDIL3</i>     | Body    |
| cg25510164 | 4  | 22,818,572  | 0.002476 | -0.252 | -0.218 |          |        |     | <i>GBA3</i>      | Body    |
| cg14592673 | 17 | 48,768,755  | 1.78E-10 | -0.253 | -0.248 |          |        |     | <i>ABCC3</i>     | 3'UTR   |
| cg25202503 | 13 | 111,468,250 | 1.12E-07 | -0.253 | -0.299 |          |        |     |                  |         |
| cg21615397 | 18 | 55,714,393  | 6.67E-05 | -0.253 | -0.215 |          |        |     | <i>NEDD4L</i>    | TSS200  |
| cg24691330 | 8  | 125,150,452 | 2.38E-05 | -0.253 | -0.268 |          |        |     |                  |         |
| cg13401658 | 2  | 177,311,027 | 7.59E-08 | -0.253 | -0.202 |          |        |     |                  |         |
| cg15498306 | 4  | 164,534,641 | 2.16E-09 | -0.253 | -0.257 |          |        |     | <i>MARCH1</i>    | Body    |
| cg07638009 | 12 | 126,571,072 | 0.000903 | -0.253 | -0.308 |          |        |     |                  |         |
| cg17436778 | 5  | 57,184,384  | 6.39E-05 | -0.253 | -0.229 |          |        |     |                  |         |
| cg14727409 | 20 | 29,994,192  | 0.001157 | -0.253 | -0.184 |          |        |     | <i>DEFB121</i>   | TSS1500 |
| cg23853165 | 10 | 42,864,912  | 0.015247 | -0.253 | -0.229 |          |        |     | <i>LOC441666</i> | TSS1500 |
| cg05636047 | 4  | 188,156,675 | 6.6E-05  | -0.253 | -0.195 |          |        |     |                  |         |
| cg14174502 | 1  | 104,523,359 | 2.58E-07 | -0.253 | -0.261 |          |        |     |                  |         |
| cg26570233 | 11 | 93,475,962  | 0.00096  | -0.253 | -0.159 | 3.27E-13 | -0.226 |     | <i>TAF1D</i>     | TSS1500 |
| cg19758142 | 3  | 172,365,942 | 0.000003 | -0.253 | -0.256 |          |        |     | <i>NCEH1</i>     | 5'UTR   |
| cg17341136 | 12 | 132,893,339 | 0.025072 | -0.253 | -0.104 |          |        |     | <i>GALNT9</i>    | Body    |
| cg25319337 | 7  | 48,008,127  | 0.002763 | -0.253 | -0.155 |          |        |     | <i>HUS1</i>      | Body    |
| cg01247127 | 20 | 1,538,366   | 0.006129 | -0.253 | -0.199 |          |        |     | <i>SIRPD</i>     | TSS200  |
| cg01564165 | 13 | 114,109,526 | 0.017849 | -0.253 | -0.321 |          |        | Yes |                  |         |
| cg07294323 | 16 | 73,083,327  | 6.04E-07 | -0.253 | -0.217 |          |        |     | <i>ZFH3</i>      | 5'UTR   |
| cg07109745 | 11 | 3,901,552   | 5.18E-06 | -0.253 | -0.235 |          |        |     | <i>STIM1</i>     | Body    |
| cg19545933 | 15 | 81,028,959  | 6.04E-09 | -0.253 | -0.230 |          |        |     | <i>FAM108C1</i>  | Body    |
| cg17297045 | 12 | 125,581,343 | 6.47E-07 | -0.253 | -0.245 |          |        |     | <i>AACS</i>      | Body    |
| cg01747796 | 1  | 59,040,648  | 0.001296 | -0.253 | -0.211 |          |        |     |                  |         |
| cg07259382 | 4  | 164,536,228 | 0.038491 | -0.253 | -0.075 |          |        |     | <i>MARCH1</i>    | TSS1500 |
| cg14095733 | X  | 27,481,558  | 0.000843 | -0.253 | -0.197 |          |        |     | <i>SMEK3P</i>    | TSS200  |
| cg24014538 | 13 | 98,870,066  | 0.00342  | -0.253 | -0.198 |          |        |     | <i>FARP1</i>     | Body    |
| cg26746878 | 7  | 50,470,492  | 0.003134 | -0.253 | -0.218 |          |        |     | <i>IKZF1</i>     | 3'UTR   |
| cg09705667 | 11 | 125,525,217 | 1.92E-07 | -0.253 | -0.244 |          |        |     | <i>CHEK1</i>     | 3'UTR   |

|            |    |             |          |        |        |            |        |  |                |         |
|------------|----|-------------|----------|--------|--------|------------|--------|--|----------------|---------|
| cg02620403 | 5  | 110,404,837 | 3.85E-09 | -0.253 | -0.254 |            |        |  |                |         |
| cg15985905 | 12 | 128,078,475 | 2.87E-08 | -0.253 | -0.264 |            |        |  |                |         |
| cg18568534 | 14 | 23,240,117  | 3.04E-09 | -0.253 | -0.229 |            |        |  | <i>OXA1L</i>   | Body    |
| cg00003965 | 3  | 108,476,878 | 0.024924 | -0.253 | -0.145 |            |        |  | <i>RETNLB</i>  | TSS1500 |
| cg04664126 | 6  | 28,554,262  | 2E-17    | -0.253 | -0.245 |            |        |  | <i>SCAND3</i>  | 1stExon |
| cg10119001 | 1  | 153,114,766 | 0.015064 | -0.253 | -0.166 |            |        |  | <i>SPRR2C</i>  | TSS1500 |
| cg21049958 | 19 | 42,134,128  | 0.001778 | -0.253 | -0.144 |            |        |  | <i>CEACAM4</i> | TSS1500 |
| cg24721647 | 4  | 185,726,836 | 3.19E-09 | -0.253 | -0.248 |            |        |  | <i>ACSL1</i>   | 5'UTR   |
| cg15057995 | 12 | 43,399,208  | 0.000175 | -0.253 | -0.197 |            |        |  |                |         |
| cg06190216 | X  | 152,771,994 | 0.005047 | -0.253 | -0.142 |            |        |  | <i>BGN</i>     | Body    |
| cg03368758 | 4  | 16,900,733  | 0.017164 | -0.253 | -0.182 | 0.02469547 | -0.055 |  | <i>LDB2</i>    | TSS1500 |
| cg08625996 | 7  | 127,547,490 | 3.15E-06 | -0.253 | -0.221 |            |        |  | <i>SND1</i>    | Body    |
| cg15200711 | 5  | 1,507,775   | 0.034865 | -0.253 | -0.173 |            |        |  | <i>LPCAT1</i>  | Body    |
| cg00332689 | 8  | 2,885,537   | 0.00246  | -0.253 | -0.166 |            |        |  | <i>CSMD1</i>   | Body    |
| cg21393699 | X  | 70,405,164  | 3.1E-06  | -0.253 | -0.253 |            |        |  |                |         |
| cg19632664 | 12 | 34,447,816  | 5.06E-05 | -0.253 | -0.270 |            |        |  |                |         |
| cg23581700 | 8  | 73,012,616  | 0.034936 | -0.253 | -0.201 |            |        |  |                |         |
| cg27242134 | 11 | 94,824,192  | 6.84E-11 | -0.253 | -0.245 |            |        |  | <i>ENDOD1</i>  | Body    |
| cg07778290 | 12 | 6,325,048   | 4.69E-06 | -0.253 | -0.234 |            |        |  | <i>CD9</i>     | Body    |
| cg07842635 | 13 | 47,862,393  | 4.73E-06 | -0.253 | -0.293 |            |        |  |                |         |
| cg25727008 | 7  | 62,577,907  | 0.006974 | -0.253 | -0.187 |            |        |  |                |         |
| cg26858065 | 19 | 53,932,017  | 0.000255 | -0.253 | -0.260 |            |        |  |                |         |
| cg02986451 | 18 | 59,159,403  | 0.002906 | -0.253 | -0.186 |            |        |  | <i>CDH20</i>   | Body    |
| cg13594869 | 14 | 86,088,946  | 0.000906 | -0.253 | -0.245 |            |        |  | <i>FLRT2</i>   | Body    |
| cg14508777 | 3  | 42,847,116  | 3.98E-12 | -0.253 | -0.235 |            |        |  | <i>HIGD1A</i>  | TSS1500 |
| cg09386139 | 17 | 7,143,424   | 2.2E-09  | -0.253 | -0.221 |            |        |  | <i>PHF23</i>   | TSS1500 |
| cg20189937 | 14 | 50,780,124  | 2.44E-13 | -0.253 | -0.244 |            |        |  | <i>ATP5S</i>   | Body    |
| cg17794320 | 15 | 90,190,822  | 8.99E-06 | -0.253 | -0.162 |            |        |  | <i>KIF7</i>    | Body    |
| cg18560638 | 13 | 100,008,200 | 2.15E-08 | -0.253 | -0.273 |            |        |  | <i>UBAC2</i>   | Body    |
| cg14405300 | 2  | 88,427,027  | 0.01375  | -0.253 | -0.131 |            |        |  | <i>FABP1</i>   | Body    |
| cg22541336 | 7  | 32,106,580  | 0.024529 | -0.253 | -0.167 |            |        |  | <i>PDE1C</i>   | Body    |
| cg12517410 | 2  | 115,612,096 | 0.000437 | -0.253 | -0.278 |            |        |  | <i>DPP10</i>   | Body    |
| cg14055195 | 3  | 99,013,462  | 5.28E-11 | -0.253 | -0.237 |            |        |  |                |         |
| cg20654082 | 2  | 191,895,804 | 9.37E-08 | -0.253 | -0.218 |            |        |  | <i>STAT4</i>   | Body    |

|            |    |             |          |        |        |  |     |  |                     |         |
|------------|----|-------------|----------|--------|--------|--|-----|--|---------------------|---------|
| cg18413062 | 11 | 132,931,732 | 3.98E-09 | -0.253 | -0.235 |  |     |  | <i>OPCML</i>        | Body    |
| cg06440087 | 10 | 7,745,191   | 0.000186 | -0.253 | -0.233 |  |     |  | <i>ITIH2</i>        | TSS200  |
| cg03002735 | 8  | 94,998,325  | 3.88E-07 | -0.253 | -0.308 |  |     |  |                     |         |
| cg10979216 | 8  | 50,947,399  | 0.014555 | -0.253 | -0.178 |  |     |  | <i>SNTG1</i>        | 5'UTR   |
| cg15320905 | 12 | 114,162,813 | 0.027762 | -0.253 | -0.187 |  |     |  |                     |         |
| cg25764935 | 6  | 168,551,427 | 3.34E-05 | -0.253 | -0.188 |  |     |  |                     |         |
| cg01208614 | 5  | 141,031,443 | 6.21E-08 | -0.253 | -0.238 |  |     |  | <i>FCHSD1</i>       | TSS1500 |
| cg12472416 | 17 | 48,077,156  | 5.44E-09 | -0.253 | -0.211 |  |     |  |                     |         |
| cg01472043 | 10 | 11,868,183  | 0.018379 | -0.253 | -0.151 |  |     |  | <i>C10orf47</i>     | 5'UTR   |
| cg01978246 | 8  | 145,749,776 | 1.46E-07 | -0.253 | -0.245 |  |     |  | <i>LRRC24</i>       | Body    |
| cg08866497 | 5  | 43,781,155  | 4.93E-11 | -0.253 | -0.249 |  |     |  |                     |         |
| cg11152825 | 20 | 44,881,449  | 2.25E-08 | -0.254 | -0.291 |  |     |  | <i>CDH22</i>        | TSS1500 |
| cg23759189 | 11 | 131,410,868 | 0.002277 | -0.254 | -0.248 |  |     |  | <i>NTM</i>          | Body    |
| cg04281344 | 16 | 5,530,509   | 1.75E-08 | -0.254 | -0.278 |  |     |  |                     |         |
| cg17143291 | 1  | 181,458,839 | 3.39E-07 | -0.254 | -0.224 |  |     |  | <i>CACNA1E</i>      | Body    |
| cg10770652 | 6  | 32,945,243  | 6.39E-10 | -0.254 | -0.265 |  |     |  | <i>BRD2</i>         | Body    |
| cg21621104 | 3  | 66,468,921  | 2.36E-07 | -0.254 | -0.254 |  |     |  | <i>LRIG1</i>        | Body    |
| cg01859460 | 19 | 2,273,050   | 1.34E-12 | -0.254 | -0.263 |  |     |  | <i>OAZ1</i>         | Body    |
| cg07014126 | 6  | 169,717,713 | 0.012252 | -0.254 | -0.115 |  |     |  |                     |         |
| cg16845880 | 3  | 81,886,014  | 3.65E-06 | -0.254 | -0.250 |  |     |  |                     |         |
| cg03443143 | Y  | 9,363,365   | 0.004633 | -0.254 | -0.154 |  |     |  | <i>TSPY4</i>        | Body    |
| cg19618505 | X  | 27,882,528  | 0.001443 | -0.254 | -0.181 |  |     |  |                     |         |
| cg00592871 | 8  | 118,738,517 | 0.000166 | -0.254 | -0.246 |  |     |  |                     |         |
| cg03888064 | 1  | 156,305,656 | 6.97E-12 | -0.254 | -0.240 |  |     |  | <i>CCT3</i>         | Body    |
| cg06565368 | 11 | 131,907,820 | 8.15E-08 | -0.254 | -0.257 |  |     |  | <i>NTM</i>          | Body    |
| cg07639982 | 10 | 12,555,079  | 4.99E-08 | -0.254 | -0.263 |  | Yes |  | <i>CAMK1D</i>       | Body    |
| cg09093409 | 11 | 67,113,285  | 0.015062 | -0.254 | -0.154 |  |     |  | <i>LOC100130987</i> | Body    |
| cg11623855 | 11 | 33,563,720  | 1.65E-17 | -0.254 | -0.231 |  |     |  | <i>C11orf41</i>     | TSS200  |
| cg26522684 | 7  | 56,563,018  | 0.000296 | -0.254 | -0.233 |  |     |  | <i>DKFZp434L192</i> | TSS1500 |
| cg18553202 | 7  | 63,893,881  | 4.25E-08 | -0.254 | -0.248 |  |     |  | <i>LOC649395</i>    | TSS200  |
| cg07179981 | 7  | 922,051     | 1.2E-06  | -0.254 | -0.266 |  |     |  | <i>C7orf20</i>      | Body    |
| cg16322346 | 4  | 57,874,657  | 8.28E-06 | -0.254 | -0.233 |  |     |  | <i>POLR2B</i>       | Body    |
| cg19210342 | 10 | 23,640,730  | 0.000634 | -0.254 | -0.218 |  |     |  |                     |         |
| cg17494438 | 10 | 50,600,744  | 2.01E-06 | -0.254 | -0.172 |  |     |  | <i>DRGX</i>         | TSS1500 |

|            |    |             |          |        |        |          |        |     |                  |         |
|------------|----|-------------|----------|--------|--------|----------|--------|-----|------------------|---------|
| cg04706044 | 12 | 127,208,176 | 0.0174   | -0.254 | -0.159 |          |        |     |                  |         |
| cg14270650 | 6  | 136,397,995 | 0.008627 | -0.254 | -0.112 |          |        |     | <i>PDE7B</i>     | Body    |
| cg24009656 | 6  | 146,759,324 | 0.004299 | -0.254 | -0.210 |          |        |     |                  |         |
| cg14557554 | 9  | 136,217,171 | 1.32E-06 | -0.254 | -0.261 |          |        |     | <i>SNORD36C</i>  | TSS1500 |
| cg16925177 | 8  | 73,849,114  | 0.024181 | -0.254 | -0.172 |          |        |     | <i>KCNB2</i>     | Body    |
| cg25493276 | 5  | 3,855,077   | 0.034128 | -0.254 | -0.145 |          |        |     |                  |         |
| cg03984344 | 4  | 126,232,432 | 3.04E-05 | -0.254 | -0.198 |          |        |     |                  |         |
| cg09432465 | 16 | 32,486,334  | 0.00015  | -0.254 | -0.229 |          |        |     |                  |         |
| cg11937768 | 10 | 65,344,030  | 9.59E-09 | -0.254 | -0.248 |          |        |     | <i>REEP3</i>     | Body    |
| cg16888547 | 7  | 32,339,497  | 0.012679 | -0.254 | -0.179 |          |        |     |                  |         |
| cg20268689 | 2  | 20,431,435  | 4.79E-09 | -0.254 | -0.237 |          |        |     |                  |         |
| cg05357660 | 6  | 105,750,581 | 0.006968 | -0.254 | -0.353 |          |        |     | <i>PREP</i>      | Body    |
| cg08469215 | 1  | 156,261,351 | 1.38E-07 | -0.254 | -0.214 |          |        |     | <i>TMEM79</i>    | Body    |
| cg09258315 | 20 | 62,053,155  | 4.81E-07 | -0.254 | -0.210 |          |        |     | <i>KCNQ2</i>     | Body    |
| cg01015395 | 5  | 167,332,342 | 0.004003 | -0.254 | -0.230 |          |        |     | <i>ODZ2</i>      | Body    |
| cg26827876 | 19 | 51,409,609  | 8.04E-07 | -0.254 | -0.240 |          |        |     | <i>KLK4</i>      | 3'UTR   |
| cg18088587 | 17 | 25,618,450  | 1.06E-07 | -0.254 | -0.266 |          |        |     |                  |         |
| cg16330965 | 15 | 66,790,390  | 4.03E-06 | -0.254 | -0.217 | 1.05E-16 | -0.142 |     | <i>SNAPC5</i>    | TSS1500 |
| cg07070518 | 7  | 976,997     | 0.000853 | -0.254 | -0.166 |          |        |     | <i>ADAP1</i>     | Body    |
| cg16927372 | 17 | 32,367,929  | 0.000301 | -0.254 | -0.259 |          |        | Yes | <i>ACCN1</i>     | Body    |
| cg17385248 | 10 | 133,507,998 | 0.013408 | -0.254 | -0.139 |          |        |     |                  |         |
| cg20840800 | 2  | 79,253,193  | 0.011583 | -0.254 | -0.168 |          |        |     | <i>REG3G</i>     | 5'UTR   |
| cg17901584 | 1  | 55,353,706  | 7.14E-10 | -0.254 | -0.248 |          |        |     | <i>DHCR24</i>    | TSS1500 |
| cg27312916 | 11 | 85,469,117  | 1.1E-05  | -0.254 | -0.260 |          |        |     | <i>SYTL2</i>     | TSS200  |
| cg09649901 | 6  | 133,851,460 | 0.001169 | -0.254 | -0.230 |          |        |     | <i>EYA4</i>      | 3'UTR   |
| cg26754170 | 10 | 54,969,710  | 2.27E-07 | -0.254 | -0.236 |          |        |     |                  |         |
| cg09685763 | 20 | 30,597,590  | 0.000528 | -0.254 | -0.218 |          |        |     | <i>C20orf160</i> | TSS1500 |
| cg15731296 | X  | 150,867,017 | 1.58E-09 | -0.254 | -0.230 |          |        |     | <i>PRRG3</i>     | 5'UTR   |
| cg20651080 | 17 | 80,019,526  | 3.05E-08 | -0.254 | -0.240 |          |        |     | <i>DUS1L</i>     | Body    |
| cg20761840 | 4  | 186,732,153 | 3.32E-10 | -0.254 | -0.237 |          |        |     | <i>SORBS2</i>    | 5'UTR   |
| cg13441112 | 1  | 196,844,364 | 0.000412 | -0.254 | -0.249 |          |        |     |                  |         |
| cg00181889 | 4  | 154,261,731 | 1.41E-05 | -0.254 | -0.209 |          |        |     |                  |         |
| cg01541650 | 6  | 157,505,968 | 1.56E-06 | -0.254 | -0.264 |          |        |     | <i>ARID1B</i>    | Body    |
| cg21320123 | 7  | 153,897,058 | 0.008284 | -0.254 | -0.228 |          |        |     | <i>DPP6</i>      | Body    |

|            |    |             |          |        |        |  |  |  |                  |         |
|------------|----|-------------|----------|--------|--------|--|--|--|------------------|---------|
| cg05318503 | 6  | 44,383,329  | 4.07E-06 | -0.254 | -0.247 |  |  |  | <i>CDC5L</i>     | Body    |
| cg15646741 | 1  | 208,021,736 | 2.79E-15 | -0.254 | -0.231 |  |  |  |                  |         |
| cg10208132 | 4  | 16,362,584  | 0.002832 | -0.254 | -0.225 |  |  |  |                  |         |
| cg24405068 | 6  | 137,366,336 | 4.69E-07 | -0.254 | -0.214 |  |  |  | <i>IL20RA</i>    | TSS200  |
| cg08448547 | 8  | 47,862,954  | 0.007886 | -0.254 | -0.196 |  |  |  |                  |         |
| cg11744116 | 7  | 141,673,582 | 0.000412 | -0.254 | -0.290 |  |  |  | <i>TAS2R38</i>   | TSS200  |
| cg01638235 | 12 | 34,536,156  | 3.41E-08 | -0.254 | -0.251 |  |  |  |                  |         |
| cg22575043 | 7  | 1,664,952   | 0.001095 | -0.254 | -0.186 |  |  |  |                  |         |
| cg14651254 | 1  | 1,449,202   | 0.000831 | -0.254 | -0.282 |  |  |  | <i>ATAD3A</i>    | 5'UTR   |
| cg00881487 | X  | 3,236,105   | 2.12E-05 | -0.254 | -0.234 |  |  |  | <i>MXRA5</i>     | Body    |
| cg04598611 | 1  | 171,640,223 | 7.82E-05 | -0.254 | -0.243 |  |  |  |                  |         |
| cg19223190 | 17 | 80,058,835  | 0.012319 | -0.254 | -0.235 |  |  |  |                  |         |
| cg19904031 | 1  | 157,805,906 | 0.022817 | -0.254 | -0.128 |  |  |  | <i>CD5L</i>      | Body    |
| cg02395779 | 3  | 101,396,658 | 0.000415 | -0.254 | -0.266 |  |  |  | <i>ZBTB11</i>    | TSS1500 |
| cg23549179 | 12 | 113,228,545 | 0.021896 | -0.254 | -0.101 |  |  |  | <i>RPH3A</i>     | TSS1500 |
| cg08124030 | 3  | 149,095,283 | 1.43E-10 | -0.255 | -0.255 |  |  |  | <i>TM4SF1</i>    | 1stExon |
| cg06895005 | 16 | 86,168,540  | 0.018773 | -0.255 | -0.103 |  |  |  |                  |         |
| cg13580649 | 4  | 177,467,794 | 0.001711 | -0.255 | -0.136 |  |  |  |                  |         |
| cg22917617 | X  | 150,861,519 | 0.025822 | -0.255 | -0.154 |  |  |  |                  |         |
| cg13208438 | 15 | 78,296,041  | 1.77E-06 | -0.255 | -0.251 |  |  |  | <i>TBC1D2B</i>   | Body    |
| cg10719363 | 7  | 157,314,735 | 6.82E-05 | -0.255 | -0.196 |  |  |  |                  |         |
| cg14348706 | 6  | 33,170,405  | 5.61E-10 | -0.255 | -0.238 |  |  |  | <i>SLC39A7</i>   | Body    |
| cg17282592 | 10 | 6,797,081   | 0.01949  | -0.255 | -0.159 |  |  |  |                  |         |
| cg04879561 | 7  | 31,126,531  | 0.013277 | -0.255 | -0.225 |  |  |  | <i>ADCYAP1R1</i> | Body    |
| cg10316270 | 4  | 155,702,266 | 1.58E-07 | -0.255 | -0.187 |  |  |  | <i>RBM46</i>     | TSS200  |
| cg19593182 | 6  | 30,176,076  | 1.42E-09 | -0.255 | -0.277 |  |  |  | <i>TRIM26</i>    | 5'UTR   |
| cg00290626 | 8  | 132,499,131 | 0.033889 | -0.255 | -0.163 |  |  |  |                  |         |
| cg18477362 | 3  | 166,452,764 | 4.05E-07 | -0.255 | -0.257 |  |  |  |                  |         |
| cg01932361 | 16 | 86,985,993  | 0.00049  | -0.255 | -0.224 |  |  |  |                  |         |
| cg17495046 | 1  | 2,017,010   | 2.39E-09 | -0.255 | -0.199 |  |  |  | <i>PRKCZ</i>     | Body    |
| cg19589277 | 12 | 119,313,382 | 0.00048  | -0.255 | -0.207 |  |  |  |                  |         |
| cg17476320 | 22 | 50,007,440  | 3.61E-05 | -0.255 | -0.226 |  |  |  |                  |         |
| cg01521917 | 17 | 56,238,140  | 0.000514 | -0.255 | -0.164 |  |  |  |                  |         |
| cg08617337 | X  | 151,802,723 | 2.16E-06 | -0.255 | -0.258 |  |  |  |                  |         |



|            |    |             |          |        |        |          |        |     |                     |         |
|------------|----|-------------|----------|--------|--------|----------|--------|-----|---------------------|---------|
| cg02169859 | 9  | 100,068,416 | 0.001066 | -0.255 | -0.255 |          |        |     | <i>KIAA1529</i>     | Body    |
| cg21243459 | 9  | 92,264,216  | 3.09E-07 | -0.255 | -0.223 |          |        |     | <i>LOC100129066</i> | Body    |
| cg03266780 | 6  | 70,762,024  | 0.00139  | -0.255 | -0.247 |          |        |     | <i>COL19A1</i>      | Body    |
| cg26516710 | 16 | 2,569,911   | 0.000314 | -0.255 | -0.228 |          |        |     | <i>AMDHD2</i>       | TSS1500 |
| cg06690548 | 4  | 139,162,808 | 5.05E-08 | -0.255 | -0.208 | 5.37E-08 | -0.140 |     | <i>SLC7A11</i>      | Body    |
| cg22226775 | 1  | 3,008,033   | 0.000939 | -0.255 | -0.154 |          |        |     | <i>PRDM16</i>       | Body    |
| cg23976934 | 19 | 2,867,289   | 3.03E-05 | -0.255 | -0.252 |          |        |     | <i>ZNF556</i>       | TSS200  |
| cg04757389 | 19 | 5,250,655   | 4.3E-10  | -0.255 | -0.236 |          |        |     | <i>PTPRS</i>        | Body    |
| cg07157893 | 4  | 164,535,548 | 0.003069 | -0.255 | -0.148 |          |        |     | <i>MARCH1</i>       | TSS1500 |
| cg08895260 | 11 | 82,756,563  | 3.73E-06 | -0.255 | -0.220 |          |        |     | <i>RAB30</i>        | 5'UTR   |
| cg08271443 | 16 | 4,845,348   | 0.00855  | -0.255 | -0.192 |          |        |     | <i>LOC440335</i>    | TSS200  |
| cg19318403 | 7  | 107,389,546 | 4.67E-08 | -0.255 | -0.250 |          |        |     | <i>CBLL1</i>        | Body    |
| cg24602572 | X  | 103,294,320 | 0.003391 | -0.255 | -0.162 |          |        |     | <i>MIR1256</i>      | Body    |
| cg00339769 | 6  | 24,489,855  | 8.06E-11 | -0.255 | -0.256 |          |        |     | <i>GPLD1</i>        | TSS200  |
| cg22896102 | 17 | 27,272,875  | 9.1E-05  | -0.255 | -0.231 |          |        |     | <i>PHF12</i>        | Body    |
| cg18871179 | 7  | 57,468,369  | 0.001123 | -0.255 | -0.189 |          |        |     |                     |         |
| cg03555881 | 6  | 31,275,551  | 0.000297 | -0.255 | -0.263 |          |        |     |                     |         |
| cg14080925 | 4  | 652,907     | 0.003852 | -0.255 | -0.359 |          |        |     | <i>PDE6B</i>        | Body    |
| cg14261474 | 4  | 158,555,507 | 0.015245 | -0.255 | -0.181 |          |        |     |                     |         |
| cg04736911 | 2  | 71,220,904  | 1.54E-10 | -0.255 | -0.264 |          |        |     | <i>TEX261</i>       | Body    |
| cg23110407 | 7  | 31,745,454  | 0.008441 | -0.255 | -0.137 |          |        |     | <i>C7orf16</i>      | Body    |
| cg24066641 | 5  | 179,554,466 | 7.49E-12 | -0.255 | -0.244 |          |        | Yes | <i>RASGEF1C</i>     | Body    |
| cg06175416 | 4  | 178,046,085 | 0.01918  | -0.255 | -0.108 |          |        |     |                     |         |
| cg06228763 | 7  | 1,773,169   | 7.78E-05 | -0.255 | -0.300 |          |        |     | <i>ELFN1</i>        | 5'UTR   |
| cg10681391 | 3  | 134,512,480 | 0.030018 | -0.255 | -0.221 |          |        |     |                     |         |
| cg14511866 | 2  | 102,448,055 | 2.3E-07  | -0.255 | -0.233 |          |        |     | <i>MAP4K4</i>       | Body    |
| cg25524464 | 10 | 133,326,998 | 0.010646 | -0.255 | -0.130 |          |        |     |                     |         |
| cg04795700 | 13 | 113,652,110 | 3.98E-05 | -0.255 | -0.274 |          |        |     | <i>MCF2L</i>        | Body    |
| cg17164016 | 8  | 110,990,365 | 2.43E-14 | -0.255 | -0.266 |          |        |     |                     |         |
| cg24895497 | 8  | 133,138,440 | 0.020151 | -0.255 | -0.189 |          |        |     |                     |         |
| cg27631199 | 1  | 66,376,337  | 1.52E-09 | -0.255 | -0.228 |          |        |     | <i>PDE4B</i>        | 5'UTR   |
| cg16582255 | 5  | 41,152,767  | 1.82E-06 | -0.255 | -0.277 |          |        |     | <i>C6</i>           | Body    |
| cg23408116 | 4  | 190,462,739 | 0.001782 | -0.255 | -0.187 |          |        |     |                     |         |
| cg23833033 | 2  | 206,544,411 | 1.31E-05 | -0.255 | -0.179 |          |        |     |                     |         |

|            |    |             |          |        |        |          |        |  |                  |         |
|------------|----|-------------|----------|--------|--------|----------|--------|--|------------------|---------|
| cg09675824 | 20 | 61,695,785  | 0.000144 | -0.255 | -0.244 |          |        |  |                  |         |
| cg15211996 | 1  | 2,936,768   | 0.007642 | -0.255 | -0.122 |          |        |  | <i>ACTRT2</i>    | TSS1500 |
| cg06373660 | 13 | 81,414,986  | 2.37E-05 | -0.255 | -0.201 |          |        |  |                  |         |
| cg07209298 | 1  | 196,795,943 | 0.000154 | -0.255 | -0.227 |          |        |  | <i>CFHR1</i>     | Body    |
| cg20778022 | 7  | 119,121,235 | 0.023611 | -0.255 | -0.171 |          |        |  |                  |         |
| cg09141856 | 16 | 5,498,227   | 0.003022 | -0.255 | -0.205 |          |        |  |                  |         |
| cg12967164 | 7  | 1,753,637   | 1.23E-07 | -0.255 | -0.244 |          |        |  | <i>ELFN1</i>     | 5'UTR   |
| cg22529760 | 4  | 190,283,198 | 3.41E-06 | -0.255 | -0.178 |          |        |  |                  |         |
| cg00635343 | 18 | 5,193,969   | 1.37E-05 | -0.255 | -0.223 |          |        |  | <i>LOC642597</i> | Body    |
| cg20243900 | 19 | 1,908,388   | 0.000173 | -0.255 | -0.247 |          |        |  | <i>ADAT3</i>     | 5'UTR   |
| cg21134737 | 11 | 2,871,400   | 3.42E-07 | -0.255 | -0.256 |          |        |  |                  |         |
| cg03925970 | 8  | 140,352,581 | 0.000332 | -0.256 | -0.198 |          |        |  |                  |         |
| cg06042148 | 8  | 97,138,161  | 0.000406 | -0.256 | -0.238 |          |        |  |                  |         |
| cg13696012 | 20 | 31,595,360  | 4.06E-06 | -0.256 | -0.279 | 1.24E-16 | -0.135 |  | <i>BPIL1</i>     | TSS200  |
| cg19591696 | 8  | 33,132,258  | 6.97E-05 | -0.256 | -0.206 |          |        |  |                  |         |
| cg05215056 | 10 | 44,250,314  | 0.025383 | -0.256 | -0.210 |          |        |  |                  |         |
| cg25742300 | 2  | 142,857,903 | 0.000715 | -0.256 | -0.205 |          |        |  | <i>LRP1B</i>     | Body    |
| cg07053177 | 12 | 128,899,814 | 0.025249 | -0.256 | -0.160 |          |        |  | <i>TMEM132C</i>  | Body    |
| cg10860270 | X  | 77,912,297  | 0.036164 | -0.256 | -0.142 |          |        |  | <i>ZCCHC5</i>    | 3'UTR   |
| cg17512993 | 17 | 80,039,971  | 0.010948 | -0.256 | -0.116 |          |        |  | <i>FASN</i>      | Body    |
| cg05038367 | 22 | 42,479,360  | 4.7E-07  | -0.256 | -0.271 |          |        |  | <i>C22orf32</i>  | 3'UTR   |
| cg02150582 | 6  | 9,398,309   | 2.11E-11 | -0.256 | -0.261 |          |        |  |                  |         |
| cg27090727 | 3  | 161,884,911 | 0.004073 | -0.256 | -0.260 |          |        |  |                  |         |
| cg03345976 | 4  | 118,007,225 | 2.79E-07 | -0.256 | -0.261 |          |        |  | <i>TRAM1L1</i>   | TSS1500 |
| cg04943797 | 20 | 61,671,429  | 2.02E-06 | -0.256 | -0.231 |          |        |  |                  |         |
| cg23500637 | 6  | 74,027,775  | 0.000841 | -0.256 | -0.237 |          |        |  |                  |         |
| cg20976019 | 17 | 25,931,360  | 0.002608 | -0.256 | -0.186 |          |        |  | <i>KSR1</i>      | Body    |
| cg08247887 | 10 | 44,394,566  | 0.028049 | -0.256 | -0.177 |          |        |  |                  |         |
| cg05138957 | 14 | 101,528,123 | 0.000312 | -0.256 | -0.256 |          |        |  | <i>MIR377</i>    | TSS1500 |
| cg06099439 | 1  | 3,146,905   | 0.032199 | -0.256 | -0.078 |          |        |  | <i>PRDM16</i>    | Body    |
| cg00201870 | 7  | 53,103,789  | 1.81E-05 | -0.256 | -0.205 |          |        |  | <i>POM121L12</i> | 1stExon |
| cg07556151 | 16 | 3,089,237   | 4.31E-07 | -0.256 | -0.236 |          |        |  |                  |         |
| cg10072526 | 16 | 6,534,430   | 0.015096 | -0.256 | -0.204 |          |        |  | <i>A2BP1</i>     | 5'UTR   |
| cg08160063 | 16 | 7,704,961   | 0.021077 | -0.256 | -0.170 |          |        |  | <i>A2BP1</i>     | Body    |

|            |    |             |          |        |        |          |        |     |                  |         |
|------------|----|-------------|----------|--------|--------|----------|--------|-----|------------------|---------|
| cg18437685 | 12 | 34,554,116  | 3.06E-06 | -0.256 | -0.251 |          |        |     |                  |         |
| cg01737550 | X  | 101,395,217 | 0.002008 | -0.256 | -0.266 |          |        |     | <i>TCEAL6</i>    | 3'UTR   |
| cg05555951 | 11 | 55,872,478  | 0.000298 | -0.256 | -0.237 |          |        |     | <i>OR8H2</i>     | TSS200  |
| cg10409443 | 16 | 32,252,365  | 2.63E-06 | -0.256 | -0.218 |          |        |     |                  |         |
| cg23658462 | 19 | 1,290,552   | 0.007169 | -0.256 | -0.131 |          |        |     | <i>EFNA2</i>     | Body    |
| cg16619764 | 1  | 116,524,390 | 1.38E-07 | -0.256 | -0.215 |          |        |     | <i>SLC22A15</i>  | Body    |
| cg13543106 | 3  | 90,086,806  | 4.08E-05 | -0.256 | -0.307 |          |        |     |                  |         |
| cg11038231 | 11 | 101,576,844 | 0.049651 | -0.256 | -0.255 |          |        |     |                  |         |
| cg14940420 | 3  | 51,895,692  | 0.000613 | -0.256 | -0.226 | 9.16E-12 | -0.210 |     | <i>IQCF2</i>     | 1stExon |
| cg08048194 | 12 | 55,641,538  | 0.009413 | -0.256 | -0.189 |          |        |     | <i>OR6C74</i>    | 1stExon |
| cg15598276 | 6  | 32,948,343  | 5.39E-08 | -0.256 | -0.274 |          |        | Yes | <i>BRD2</i>      | Body    |
| cg16773814 | 16 | 87,644,704  | 1.59E-07 | -0.256 | -0.216 |          |        |     | <i>JPH3</i>      | Body    |
| cg02609775 | 16 | 430,019     | 0.002662 | -0.256 | -0.256 |          |        |     | <i>TMEM8A</i>    | Body    |
| cg12200412 | 1  | 158,324,331 | 1.28E-17 | -0.256 | -0.256 | 2.28E-26 | -0.185 |     | <i>CD1E</i>      | Body    |
| cg19961720 | 22 | 17,309,849  | 0.003758 | -0.256 | -0.214 |          |        |     | <i>HSFYP1</i>    | Body    |
| cg25813290 | 7  | 108,767,676 | 4E-08    | -0.256 | -0.234 |          |        |     |                  |         |
| cg27096807 | 3  | 111,442,336 | 0.002973 | -0.256 | -0.210 |          |        |     | <i>PLCXD2</i>    | 3'UTR   |
| cg18742855 | 2  | 26,800,399  | 0.000588 | -0.256 | -0.125 |          |        |     | <i>C2orf70</i>   | Body    |
| cg27632318 | 1  | 241,032,479 | 0.009181 | -0.256 | -0.153 |          |        |     | <i>RGS7</i>      | Body    |
| cg03193096 | 8  | 56,363,711  | 0.001745 | -0.256 | -0.228 |          |        |     | <i>XKR4</i>      | Body    |
| cg27390627 | 1  | 242,874,219 | 0.015836 | -0.256 | -0.261 |          |        |     |                  |         |
| cg23891364 | 1  | 1,207,789   | 2.54E-17 | -0.256 | -0.244 |          |        |     | <i>UBE2J2</i>    | 5'UTR   |
| cg24949907 | 3  | 56,717,804  | 8.79E-09 | -0.256 | -0.249 |          |        |     | <i>C3orf63</i>   | TSS1500 |
| cg00191458 | 5  | 169,757,859 | 0.000288 | -0.256 | -0.247 |          |        |     | <i>LOC257358</i> | TSS1500 |
| cg11839579 | 1  | 208,891,263 | 0.005415 | -0.256 | -0.301 |          |        |     |                  |         |
| cg12094965 | 12 | 109,749,643 | 2.21E-07 | -0.256 | -0.272 |          |        |     |                  |         |
| cg16193733 | 6  | 132,465,076 | 0.015089 | -0.256 | -0.159 |          |        |     |                  |         |
| cg18580232 | 2  | 116,155,326 | 2.07E-06 | -0.256 | -0.280 |          |        |     | <i>DPP10</i>     | Body    |
| cg02132728 | 4  | 2,755,777   | 2.52E-06 | -0.256 | -0.161 |          |        |     | <i>TNIP2</i>     | Body    |
| cg08966706 | 5  | 5,034,361   | 0.007308 | -0.256 | -0.157 |          |        |     | <i>LOC340094</i> | TSS200  |
| cg16285206 | 5  | 25,106,774  | 2.5E-05  | -0.256 | -0.242 |          |        |     |                  |         |
| cg07309576 | 11 | 5,463,768   | 0.005178 | -0.256 | -0.231 |          |        |     | <i>OR5111</i>    | TSS1500 |
| cg05327192 | 11 | 75,133,593  | 1.54E-06 | -0.256 | -0.253 |          |        |     | <i>KLHL35</i>    | 3'UTR   |
| cg05247035 | 8  | 72,596,351  | 0.002692 | -0.256 | -0.164 |          |        |     |                  |         |

|            |    |             |          |        |        |          |        |     |                   |         |
|------------|----|-------------|----------|--------|--------|----------|--------|-----|-------------------|---------|
| cg05342835 | 1  | 33,160,791  | 3.02E-07 | -0.256 | -0.233 | 7.98E-22 | -0.162 |     | <i>SYNC</i>       | Body    |
| cg07915516 | 16 | 377,344     | 6.93E-09 | -0.256 | -0.246 |          |        |     | <i>AXIN1</i>      | Body    |
| cg09696486 | 16 | 7,270,014   | 0.009411 | -0.256 | -0.206 |          |        |     | <i>A2BP1</i>      | Body    |
| cg00732807 | 6  | 73,935,584  | 6.85E-06 | -0.256 | -0.240 |          |        |     | <i>KHDC1L</i>     | TSS1500 |
| cg11256628 | 8  | 113,113,972 | 3.41E-06 | -0.256 | -0.271 |          |        |     |                   |         |
| cg13882988 | 10 | 54,531,345  | 0.017478 | -0.256 | -0.221 | 1.05E-17 | -0.181 |     | <i>MBL2</i>       | 1stExon |
| cg04629189 | 11 | 41,065,794  | 0.000339 | -0.256 | -0.201 |          |        |     |                   |         |
| cg16378117 | 16 | 9,857,804   | 0.000109 | -0.256 | -0.263 |          |        |     | <i>GRIN2A</i>     | Body    |
| cg26138846 | 6  | 31,842,729  | 4.07E-08 | -0.256 | -0.300 |          |        |     | <i>SLC44A4</i>    | Body    |
| cg14841965 | 11 | 123,814,849 | 0.040517 | -0.256 | -0.167 |          |        |     | <i>OR6T1</i>      | TSS1500 |
| cg20338030 | 11 | 105,010,463 | 2.91E-07 | -0.257 | -0.219 |          |        |     | <i>CARD18</i>     | TSS200  |
| cg01422370 | 2  | 73,384,389  | 0.019383 | -0.257 | -0.118 |          |        |     |                   |         |
| cg06878303 | X  | 151,903,174 | 0.038025 | -0.257 | -0.128 |          |        |     | <i>MAGEA12</i>    | 1stExon |
| cg21448927 | 6  | 159,796,527 | 6.14E-05 | -0.257 | -0.259 |          |        |     |                   |         |
| cg22200649 | 12 | 65,961,644  | 3.27E-05 | -0.257 | -0.245 |          |        |     |                   |         |
| cg12271797 | 8  | 50,891,864  | 0.002006 | -0.257 | -0.213 |          |        |     | <i>SNTG1</i>      | 5'UTR   |
| cg17247873 | 10 | 134,332,277 | 0.046672 | -0.257 | -0.266 |          |        | Yes |                   |         |
| cg16837206 | 11 | 104,972,474 | 0.000797 | -0.257 | -0.225 |          |        |     | <i>CASP1</i>      | TSS1500 |
| cg16377367 | 1  | 85,743,497  | 4.34E-07 | -0.257 | -0.234 |          |        |     | <i>BCL10</i>      | 1stExon |
| cg09580755 | 1  | 76,761,200  | 0.000917 | -0.257 | -0.229 |          |        |     | <i>ST6GALNAC3</i> | Body    |
| cg09500738 | 15 | 87,911,464  | 0.012508 | -0.257 | -0.295 |          |        |     |                   |         |
| cg22667294 | 5  | 179,755,381 | 2.8E-14  | -0.257 | -0.224 |          |        |     | <i>GFPT2</i>      | Body    |
| cg27125439 | 10 | 29,311,888  | 1.06E-07 | -0.257 | -0.282 |          |        |     |                   |         |
| cg12228534 | 19 | 24,156,884  | 1.01E-07 | -0.257 | -0.255 |          |        |     |                   |         |
| cg16484967 | 6  | 56,234,854  | 4.72E-05 | -0.257 | -0.138 |          |        |     |                   |         |
| cg25188395 | 7  | 27,204,052  | 0.005474 | -0.257 | -0.117 |          |        |     | <i>HOXA9</i>      | Body    |
| cg06848148 | 2  | 137,748,455 | 0.000196 | -0.257 | -0.222 |          |        |     | <i>THSD7B</i>     | TSS200  |
| cg14556762 | 1  | 170,532,470 | 0.000245 | -0.257 | -0.231 |          |        |     |                   |         |
| cg10623290 | 1  | 1,912,185   | 0.005722 | -0.257 | -0.214 |          |        |     | <i>KIAA1751</i>   | Body    |
| cg22767164 | 19 | 51,958,448  | 0.000419 | -0.257 | -0.170 |          |        |     | <i>SIGLEC8</i>    | Body    |
| cg26960988 | 5  | 140,728,617 | 3.7E-05  | -0.257 | -0.235 |          |        |     | <i>PCDHGA2</i>    | Body    |
| cg08862366 | 16 | 86,152,925  | 0.027258 | -0.257 | -0.094 |          |        |     |                   |         |
| cg27395342 | 8  | 13,224,310  | 0.000195 | -0.257 | -0.263 |          |        |     | <i>DLC1</i>       | Body    |
| cg16646298 | 6  | 30,698,987  | 0.000104 | -0.257 | -0.143 |          |        |     | <i>FLOT1</i>      | Body    |

|            |    |             |          |        |        |            |        |     |                |         |
|------------|----|-------------|----------|--------|--------|------------|--------|-----|----------------|---------|
| cg14568971 | 12 | 75,883,052  | 0.000469 | -0.257 | -0.192 |            |        |     | <i>GLIPR1</i>  | Body    |
| cg13372231 | 11 | 5,531,235   | 0.002042 | -0.257 | -0.260 |            |        |     | <i>UBQLN3</i>  | TSS200  |
| cg04515986 | X  | 31,089,692  | 0.001649 | -0.257 | -0.237 | 1.2679E-05 | -0.105 |     | <i>FTHL17</i>  | 1stExon |
| cg06173461 | 11 | 48,285,821  | 0.003235 | -0.257 | -0.220 |            |        |     | <i>OR4X1</i>   | 1stExon |
| cg21146273 | 5  | 152,869,193 | 0.000606 | -0.257 | -0.296 |            |        |     | <i>GRIA1</i>   | TSS1500 |
| cg05302896 | 7  | 108,524,793 | 8.95E-05 | -0.257 | -0.223 |            |        | Yes | <i>C7orf66</i> | TSS200  |
| cg19621338 | 11 | 22,533,592  | 0.000112 | -0.257 | -0.241 |            |        |     |                |         |
| cg05818824 | 17 | 62,051,709  | 1.25E-08 | -0.257 | -0.243 |            |        |     | <i>SCN4A</i>   | TSS1500 |
| cg03460239 | 11 | 124,311,153 | 0.001643 | -0.257 | -0.244 |            |        |     | <i>OR8B8</i>   | TSS200  |
| cg02078520 | 1  | 84,944,298  | 0.000635 | -0.257 | -0.235 |            |        |     | <i>RPF1</i>    | TSS1500 |
| cg05853130 | 2  | 138,019,701 | 0.001287 | -0.257 | -0.294 |            |        |     | <i>THSD7B</i>  | Body    |
| cg20368567 | 17 | 29,649,961  | 6.14E-05 | -0.257 | -0.272 |            |        |     | <i>NF1</i>     | Body    |
| cg24828167 | 4  | 5,899,040   | 0.001475 | -0.257 | -0.190 |            |        |     |                |         |
| cg16884847 | 2  | 46,121,488  | 2.21E-07 | -0.257 | -0.273 |            |        | Yes | <i>PRKCE</i>   | Body    |
| cg22395255 | 15 | 71,903,974  | 1.57E-08 | -0.257 | -0.198 |            |        |     | <i>THSD4</i>   | Body    |
| cg26521402 | 7  | 89,842,741  | 1.09E-10 | -0.257 | -0.252 |            |        |     | <i>STEAP2</i>  | 5'UTR   |
| cg01515155 | 11 | 55,579,363  | 0.012849 | -0.257 | -0.232 |            |        |     | <i>OR5L1</i>   | 1stExon |
| cg19508823 | 2  | 116,315,952 | 0.003361 | -0.257 | -0.295 |            |        |     | <i>DPP10</i>   | Body    |
| cg23629166 | 1  | 2,345,368   | 0.000367 | -0.257 | -0.305 |            |        |     | <i>PEX10</i>   | TSS1500 |
| cg01046961 | 4  | 190,474,558 | 6.76E-06 | -0.257 | -0.220 |            |        |     |                |         |
| cg17256679 | 17 | 32,647,709  | 0.008307 | -0.257 | -0.141 |            |        |     | <i>CCL8</i>    | Body    |
| cg05750323 | 6  | 152,953,820 | 0.000283 | -0.257 | -0.210 |            |        |     | <i>SYNE1</i>   | 5'UTR   |
| cg17010657 | 5  | 125,936,146 | 3.69E-07 | -0.257 | -0.242 |            |        |     | <i>PHAX</i>    | TSS1500 |
| cg11801110 | 22 | 50,356,763  | 1.98E-08 | -0.257 | -0.263 |            |        |     | <i>PIM3</i>    | Body    |
| cg16652531 | 4  | 189,602,185 | 0.040504 | -0.257 | -0.165 |            |        |     |                |         |
| cg12236368 | 6  | 66,337,526  | 0.001389 | -0.257 | -0.226 |            |        |     | <i>EYS</i>     | 5'UTR   |
| cg19449919 | 19 | 3,232,085   | 0.004465 | -0.257 | -0.141 |            |        |     | <i>BRUNOL5</i> | Body    |
| cg26598831 | 8  | 64,681,200  | 0.000523 | -0.257 | -0.224 |            |        |     |                |         |
| cg22924840 | 2  | 127,646,404 | 0.000199 | -0.257 | -0.241 |            |        |     |                |         |
| cg27228660 | 3  | 162,705,203 | 5.93E-05 | -0.257 | -0.278 |            |        |     |                |         |
| cg14769021 | 3  | 39,231,122  | 4.78E-14 | -0.257 | -0.219 |            |        |     | <i>XIRP1</i>   | 5'UTR   |
| cg02431964 | 2  | 119,700,029 | 0.000732 | -0.258 | -0.216 | 1.02E-07   | -0.139 |     | <i>MARCO</i>   | Body    |
| cg19212391 | 17 | 72,432,790  | 5.86E-07 | -0.258 | -0.263 |            |        |     | <i>GPRC5C</i>  | Body    |
| cg27135989 | 8  | 61,088,342  | 0.009283 | -0.258 | -0.273 |            |        |     |                |         |

|            |    |             |          |        |        |  |  |     |                  |         |
|------------|----|-------------|----------|--------|--------|--|--|-----|------------------|---------|
| cg06218678 | 8  | 73,066,895  | 2.65E-05 | -0.258 | -0.262 |  |  |     |                  |         |
| cg06394103 | 2  | 116,480,197 | 1.12E-06 | -0.258 | -0.235 |  |  |     | <i>DPP10</i>     | Body    |
| cg10930290 | 2  | 219,840,349 | 1.74E-12 | -0.258 | -0.249 |  |  |     | <i>LOC151300</i> | TSS1500 |
| cg09886921 | 15 | 45,810,535  | 0.002064 | -0.258 | -0.237 |  |  |     | <i>SLC30A4</i>   | Body    |
| cg04677581 | 7  | 158,625,220 | 1.58E-05 | -0.258 | -0.239 |  |  |     |                  |         |
| cg19453059 | 20 | 29,955,259  | 5.89E-05 | -0.258 | -0.250 |  |  |     | <i>DEFB118</i>   | TSS1500 |
| cg23295683 | 14 | 81,998,796  | 2.43E-09 | -0.258 | -0.227 |  |  |     | <i>SEL1L</i>     | Body    |
| cg25202411 | 10 | 135,002,976 | 0.008273 | -0.258 | -0.091 |  |  |     | <i>KNDC1</i>     | Body    |
| cg02683577 | 2  | 88,716,767  | 0.009364 | -0.258 | -0.200 |  |  |     |                  |         |
| cg13615592 | 15 | 101,420,708 | 6.94E-17 | -0.258 | -0.258 |  |  |     | <i>ALDH1A3</i>   | Body    |
| cg01814027 | 8  | 71,923,401  | 0.006265 | -0.258 | -0.296 |  |  |     |                  |         |
| cg02217063 | 16 | 6,348,709   | 0.000301 | -0.258 | -0.256 |  |  |     | <i>A2BP1</i>     | 5'UTR   |
| cg00182421 | 3  | 170,586,396 | 0.000309 | -0.258 | -0.206 |  |  |     | <i>RPL22L1</i>   | Body    |
| cg26308293 | 2  | 125,357,655 | 0.00145  | -0.258 | -0.194 |  |  |     | <i>CNTNAP5</i>   | Body    |
| cg14583999 | 3  | 10,019,040  | 1.03E-06 | -0.258 | -0.216 |  |  |     | <i>TMEM111</i>   | Body    |
| cg20426713 | 1  | 84,763,338  | 1.46E-05 | -0.258 | -0.295 |  |  |     | <i>SAMD13</i>    | TSS1500 |
| cg14352362 | 20 | 5,293,433   | 0.00375  | -0.258 | -0.188 |  |  |     | <i>PROKR2</i>    | Body    |
| cg18625409 | 6  | 133,783,544 | 0.005357 | -0.258 | -0.227 |  |  |     | <i>EYA4</i>      | Body    |
| cg08097817 | 21 | 32,255,313  | 0.037613 | -0.258 | -0.141 |  |  |     | <i>KRTAP11-1</i> | TSS1500 |
| cg27454698 | 12 | 130,420,666 | 0.000264 | -0.258 | -0.221 |  |  |     |                  |         |
| cg08457298 | 8  | 110,693,280 | 3.48E-09 | -0.258 | -0.258 |  |  | Yes | <i>GOLSYN</i>    | 5'UTR   |
| cg25626375 | 8  | 133,072,269 | 0.000141 | -0.258 | -0.240 |  |  |     | <i>OC90</i>      | TSS1500 |
| cg22602513 | 1  | 160,429,714 | 2.39E-09 | -0.258 | -0.244 |  |  |     |                  |         |
| cg03399210 | 8  | 37,616,064  | 8.08E-10 | -0.258 | -0.232 |  |  |     |                  |         |
| cg18170680 | 22 | 49,444,372  | 0.000581 | -0.258 | -0.166 |  |  |     |                  |         |
| cg18743793 | 7  | 50,464,661  | 0.005928 | -0.258 | -0.216 |  |  |     | <i>IKZF1</i>     | Body    |
| cg22515937 | 1  | 157,790,499 | 0.000331 | -0.258 | -0.190 |  |  | Yes | <i>FCRL1</i>     | TSS1500 |
| cg24539090 | 1  | 158,978,504 | 0.001662 | -0.258 | -0.204 |  |  |     | <i>IFI16</i>     | TSS1500 |
| cg20703581 | 7  | 9,768,723   | 0.002612 | -0.258 | -0.175 |  |  |     |                  |         |
| cg03041055 | 1  | 192,154,460 | 0.001275 | -0.258 | -0.196 |  |  |     | <i>RGS18</i>     | 3'UTR   |
| cg16109680 | 1  | 159,161,344 | 5.35E-05 | -0.258 | -0.275 |  |  |     | <i>CADM3</i>     | Body    |
| cg00551647 | 21 | 27,943,730  | 0.000531 | -0.258 | -0.208 |  |  |     | <i>CYYR1</i>     | Body    |
| cg25187049 | 8  | 73,848,484  | 0.013764 | -0.258 | -0.202 |  |  |     | <i>KCNB2</i>     | Body    |
| cg25375297 | 6  | 133,783,563 | 0.031364 | -0.258 | -0.167 |  |  |     | <i>EYA4</i>      | Body    |

|            |    |             |          |        |        |  |  |     |                  |         |
|------------|----|-------------|----------|--------|--------|--|--|-----|------------------|---------|
| cg06193232 | 17 | 62,161,106  | 9.92E-07 | -0.258 | -0.247 |  |  |     | <i>ERN1</i>      | Body    |
| cg09529454 | 17 | 55,094,077  | 0.000003 | -0.258 | -0.242 |  |  |     |                  |         |
| cg01557738 | 22 | 49,812,057  | 0.000963 | -0.258 | -0.166 |  |  |     |                  |         |
| cg18605349 | 6  | 99,007,865  | 0.001303 | -0.258 | -0.223 |  |  |     |                  |         |
| cg26428069 | 2  | 134,326,273 | 4.77E-08 | -0.258 | -0.249 |  |  |     | <i>NCKAP5</i>    | TSS1500 |
| cg25024214 | 1  | 157,895,596 | 5.82E-06 | -0.258 | -0.222 |  |  |     |                  |         |
| cg06788355 | 4  | 100,613,955 | 5.13E-07 | -0.258 | -0.269 |  |  |     |                  |         |
| cg17913570 | Y  | 9,382,523   | 5.36E-05 | -0.258 | -0.247 |  |  |     |                  |         |
| cg03599774 | 2  | 84,122,914  | 0.001398 | -0.258 | -0.199 |  |  |     |                  |         |
| cg17639493 | 11 | 124,055,283 | 0.000425 | -0.258 | -0.204 |  |  |     |                  |         |
| cg00183606 | 2  | 84,517,474  | 0.010032 | -0.258 | -0.166 |  |  |     | <i>LOC388965</i> | TSS1500 |
| cg20130965 | 17 | 51,899,837  | 0.002059 | -0.258 | -0.209 |  |  |     | <i>KIF2B</i>     | TSS1500 |
| cg14603046 | 7  | 152,157,902 | 1.24E-08 | -0.258 | -0.245 |  |  |     |                  |         |
| cg08628006 | 13 | 19,243,756  | 0.000128 | -0.258 | -0.271 |  |  |     |                  |         |
| cg24968692 | 7  | 131,032,645 | 5.67E-15 | -0.258 | -0.244 |  |  |     | <i>MKLN1</i>     | Body    |
| cg26488544 | 11 | 106,351,597 | 0.017277 | -0.258 | -0.264 |  |  |     |                  |         |
| cg04858536 | 1  | 181,558,481 | 0.011487 | -0.258 | -0.322 |  |  |     | <i>CACNA1E</i>   | Body    |
| cg00374101 | 8  | 87,878,605  | 0.000849 | -0.258 | -0.193 |  |  |     | <i>CNBD1</i>     | TSS200  |
| cg13433687 | 9  | 26,293,669  | 0.006793 | -0.258 | -0.147 |  |  |     |                  |         |
| cg15336893 | 11 | 67,210,282  | 8.97E-12 | -0.258 | -0.253 |  |  |     | <i>CORO1B</i>    | 5'UTR   |
| cg08161081 | 20 | 34,327,466  | 8.84E-10 | -0.258 | -0.263 |  |  |     | <i>RBM39</i>     | Body    |
| cg03046466 | 16 | 1,005,503   | 0.005281 | -0.258 | -0.321 |  |  | Yes | <i>LMF1</i>      | Body    |
| cg04074481 | 12 | 4,917,740   | 0.003731 | -0.258 | -0.197 |  |  |     | <i>KCNA6</i>     | TSS1500 |
| cg12475142 | 17 | 79,012,396  | 1.61E-10 | -0.258 | -0.228 |  |  |     | <i>BAIAP2</i>    | Body    |
| cg04598095 | X  | 52,685,166  | 0.001217 | -0.258 | -0.216 |  |  |     | <i>SSX7</i>      | TSS1500 |
| cg05518130 | 7  | 70,666,259  | 6.29E-10 | -0.258 | -0.250 |  |  |     | <i>WBSCR17</i>   | Body    |
| cg25973354 | 19 | 1,395,646   | 0.000353 | -0.258 | -0.231 |  |  |     |                  |         |
| cg10548708 | 3  | 38,175,456  | 3.63E-06 | -0.258 | -0.221 |  |  |     | <i>ACAA1</i>     | Body    |
| cg06035708 | 16 | 6,073,509   | 4.58E-11 | -0.258 | -0.281 |  |  |     | <i>A2BP1</i>     | 5'UTR   |
| cg13608458 | 14 | 43,653,106  | 0.001314 | -0.258 | -0.185 |  |  |     |                  |         |
| cg18185596 | 1  | 195,023,534 | 0.014784 | -0.258 | -0.208 |  |  |     |                  |         |
| cg16511229 | 7  | 130,126,153 | 0.001401 | -0.258 | -0.304 |  |  |     | <i>MEST</i>      | 1stExon |
| cg07825955 | 7  | 63,014,468  | 0.005932 | -0.259 | -0.202 |  |  |     |                  |         |
| cg13985135 | 1  | 155,641,827 | 6.47E-08 | -0.259 | -0.239 |  |  |     | <i>YY1AP1</i>    | Body    |

|            |    |             |          |        |        |            |        |     |                  |         |
|------------|----|-------------|----------|--------|--------|------------|--------|-----|------------------|---------|
| cg25591428 | 1  | 247,677,638 | 3.62E-06 | -0.259 | -0.217 |            |        |     |                  |         |
| cg00562107 | 11 | 37,532,293  | 0.008713 | -0.259 | -0.170 |            |        |     |                  |         |
| cg14047153 | 5  | 1,093,797   | 0.038337 | -0.259 | -0.089 |            |        |     | <i>SLC12A7</i>   | Body    |
| cg08759276 | 16 | 86,644,262  | 1.01E-05 | -0.259 | -0.164 |            |        |     |                  |         |
| cg17547296 | 8  | 32,461,618  | 0.000206 | -0.259 | -0.214 |            |        |     | <i>NRG1</i>      | Body    |
| cg10786550 | 13 | 32,716,659  | 3.37E-05 | -0.259 | -0.242 |            |        |     | <i>FRY</i>       | Body    |
| cg02659138 | 7  | 134,003,124 | 9.11E-09 | -0.259 | -0.276 |            |        |     | <i>SLC35B4</i>   | TSS1500 |
| cg03376340 | 16 | 5,803,496   | 0.010112 | -0.259 | -0.174 |            |        | Yes |                  |         |
| cg06473675 | 2  | 237,174,072 | 1.1E-06  | -0.259 | -0.263 |            |        |     | <i>ASB18</i>     | TSS1500 |
| cg11052983 | 10 | 134,473,574 | 0.002412 | -0.259 | -0.238 |            |        |     | <i>INPP5A</i>    | Body    |
| cg25940557 | 1  | 158,575,177 | 1.11E-07 | -0.259 | -0.264 |            |        |     | <i>OR10Z1</i>    | TSS1500 |
| cg16678925 | 17 | 3,100,972   | 6.4E-05  | -0.259 | -0.222 | 1.63E-20   | -0.204 |     | <i>OR1A2</i>     | 1stExon |
| cg14647335 | 7  | 55,712,936  | 3.88E-07 | -0.259 | -0.269 |            |        |     | <i>LOC442308</i> | TSS1500 |
| cg21449397 | 12 | 113,305,783 | 0.000151 | -0.259 | -0.212 |            |        |     | <i>RPH3A</i>     | Body    |
| cg26959300 | 12 | 132,172,421 | 6.66E-05 | -0.259 | -0.206 |            |        |     |                  |         |
| cg23713998 | 14 | 30,375,102  | 3.34E-07 | -0.259 | -0.255 |            |        |     | <i>PRKD1</i>     | Body    |
| cg01025095 | 5  | 4,101,132   | 0.039935 | -0.259 | -0.098 |            |        |     |                  |         |
| cg13963735 | 8  | 106,810,858 | 0.036064 | -0.259 | -0.208 |            |        |     | <i>ZFPM2</i>     | Body    |
| cg17137218 | 1  | 3,331,278   | 1.49E-05 | -0.259 | -0.176 |            |        |     | <i>PRDM16</i>    | Body    |
| cg22791700 | 17 | 5,490,686   | 2.63E-06 | -0.259 | -0.267 |            |        |     |                  |         |
| cg16464506 | 8  | 88,034,230  | 0.002918 | -0.259 | -0.277 |            |        | Yes | <i>CNBD1</i>     | Body    |
| cg09478478 | 1  | 158,322,845 | 0.015216 | -0.259 | -0.162 | 0.00116116 | -0.120 |     | <i>CD1E</i>      | TSS1500 |
| cg21307628 | 3  | 112,360,952 | 2.96E-08 | -0.259 | -0.249 | 4.54E-29   | -0.295 |     | <i>CCDC80</i>    | TSS1500 |
| cg10803767 | 2  | 231,688,923 | 9.42E-11 | -0.259 | -0.256 |            |        |     |                  |         |
| cg26207909 | 14 | 103,986,467 | 0.012657 | -0.259 | -0.195 |            |        |     | <i>CKB</i>       | Body    |
| cg04275239 | 10 | 132,912,961 | 4.63E-07 | -0.259 | -0.257 |            |        |     | <i>TCERG1L</i>   | Body    |
| cg13209892 | 8  | 19,174,316  | 2.11E-07 | -0.259 | -0.213 |            |        |     | <i>SH2D4A</i>    | 5'UTR   |
| cg21769093 | 7  | 49,819,689  | 0.009776 | -0.259 | -0.329 |            |        |     | <i>VWC2</i>      | Body    |
| cg04931808 | 14 | 49,274,525  | 0.001793 | -0.259 | -0.230 |            |        |     |                  |         |
| cg15973075 | 5  | 12,355,075  | 0.000198 | -0.259 | -0.267 |            |        |     |                  |         |
| cg00762636 | 20 | 6,191,508   | 0.02031  | -0.259 | -0.158 |            |        |     |                  |         |
| cg21794066 | 17 | 22,023,552  | 0.00152  | -0.259 | -0.156 |            |        |     |                  |         |
| cg01164202 | 8  | 71,579,983  | 0.000156 | -0.259 | -0.234 |            |        |     | <i>LACTB2</i>    | Body    |
| cg21295295 | 1  | 156,256,448 | 0.000177 | -0.259 | -0.235 |            |        |     | <i>TMEM79</i>    | Body    |



|            |    |             |          |        |        |          |        |  |                |         |
|------------|----|-------------|----------|--------|--------|----------|--------|--|----------------|---------|
| cg07130714 | 3  | 168,335,941 | 1.05E-05 | -0.259 | -0.262 |          |        |  | <i>C3orf50</i> | Body    |
| cg14479344 | 3  | 108,126,795 | 1E-11    | -0.259 | -0.247 |          |        |  | <i>MYH15</i>   | Body    |
| cg17129017 | 19 | 4,566,400   | 0.009621 | -0.259 | -0.111 |          |        |  |                |         |
| cg26630859 | 5  | 173,738,315 | 5.01E-05 | -0.259 | -0.181 |          |        |  |                |         |
| cg15451248 | 3  | 155,570,809 | 2.54E-13 | -0.259 | -0.277 |          |        |  | <i>SLC33A1</i> | Body    |
| cg18902109 | 13 | 103,821,520 | 0.001159 | -0.259 | -0.242 |          |        |  |                |         |
| cg19724485 | 11 | 55,999,683  | 0.004789 | -0.259 | -0.241 |          |        |  | <i>OR5T2</i>   | 1stExon |
| cg21864732 | 3  | 82,014,264  | 9.32E-05 | -0.259 | -0.301 |          |        |  |                |         |
| cg10103906 | 11 | 125,744,170 | 0.003996 | -0.259 | -0.178 |          |        |  |                |         |
| cg10347418 | 1  | 23,693,926  | 9.15E-05 | -0.259 | -0.246 | 6.37E-34 | -0.252 |  | <i>ZNF436</i>  | Body    |
| cg19244064 | 10 | 103,991,857 | 3.85E-10 | -0.259 | -0.262 |          |        |  | <i>PITX3</i>   | 5'UTR   |
| cg07165610 | 3  | 39,231,277  | 2.2E-09  | -0.259 | -0.235 |          |        |  | <i>XIRP1</i>   | 5'UTR   |
| cg13662778 | 4  | 155,533,883 | 6E-08    | -0.259 | -0.225 |          |        |  | <i>FGG</i>     | 5'UTR   |
| cg12472449 | 17 | 79,022,879  | 0.035614 | -0.259 | -0.158 |          |        |  | <i>BAIAP2</i>  | Body    |
| cg26309194 | 21 | 42,880,557  | 6.42E-14 | -0.259 | -0.260 |          |        |  | <i>TMPRSS2</i> | TSS1500 |
| cg05558615 | 17 | 5,820,161   | 3.34E-05 | -0.259 | -0.210 |          |        |  |                |         |
| cg09650731 | 16 | 46,823,623  | 2.8E-12  | -0.259 | -0.231 |          |        |  |                |         |
| cg23893406 | 1  | 81,918,997  | 5.59E-09 | -0.259 | -0.233 |          |        |  |                |         |
| cg07797208 | 19 | 57,642,998  | 0.015745 | -0.259 | -0.144 |          |        |  | <i>USP29</i>   | 3'UTR   |
| cg08259755 | 8  | 56,437,720  | 0.008502 | -0.259 | -0.167 |          |        |  | <i>XKR4</i>    | 3'UTR   |
| cg11577329 | 5  | 1,093,738   | 7.45E-06 | -0.259 | -0.208 |          |        |  | <i>SLC12A7</i> | Body    |
| cg04958280 | 4  | 1,720,439   | 3.75E-16 | -0.259 | -0.257 |          |        |  | <i>TMEM129</i> | Body    |
| cg12256941 | 18 | 13,026,680  | 2.46E-06 | -0.259 | -0.232 |          |        |  | <i>CEP192</i>  | Body    |
| cg18241967 | 11 | 7,098,472   | 1.86E-06 | -0.259 | -0.267 |          |        |  |                |         |
| cg23201676 | 15 | 32,569,053  | 4.3E-12  | -0.259 | -0.265 |          |        |  |                |         |
| cg14440205 | 14 | 101,487,928 | 0.001176 | -0.259 | -0.218 |          |        |  | <i>MIR379</i>  | TSS1500 |
| cg00748911 | 10 | 44,450,977  | 0.00824  | -0.259 | -0.279 |          |        |  |                |         |
| cg00176740 | 7  | 39,472,716  | 0.030702 | -0.259 | -0.147 |          |        |  | <i>POU6F2</i>  | Body    |
| cg05068156 | 6  | 29,408,587  | 0.001869 | -0.259 | -0.222 |          |        |  | <i>OR10C1</i>  | 1stExon |
| cg11389889 | 20 | 2,634,874   | 1.81E-06 | -0.259 | -0.220 |          |        |  | <i>NOP56</i>   | Body    |
| cg25998666 | 11 | 64,780,896  | 3.49E-08 | -0.259 | -0.248 |          |        |  | <i>ARL2</i>    | TSS1500 |
| cg22864462 | 8  | 3,706,763   | 0.00345  | -0.259 | -0.209 |          |        |  | <i>CSMD1</i>   | Body    |
| cg06372233 | 2  | 79,252,027  | 0.003094 | -0.259 | -0.190 |          |        |  | <i>REG3G</i>   | TSS1500 |
| cg18580274 | 6  | 30,070,074  | 2.3E-06  | -0.259 | -0.266 |          |        |  |                |         |

|            |    |             |          |        |        |  |  |  |                 |         |
|------------|----|-------------|----------|--------|--------|--|--|--|-----------------|---------|
| cg09517450 | 5  | 1,209,057   | 0.010525 | -0.260 | -0.192 |  |  |  | <i>SLC6A19</i>  | Body    |
| cg22626866 | 19 | 22,318,466  | 0.008027 | -0.260 | -0.186 |  |  |  |                 |         |
| cg14444710 | 16 | 2,587,080   | 4.36E-05 | -0.260 | -0.199 |  |  |  | <i>PDPK1</i>    | TSS1500 |
| cg07074042 | 22 | 30,783,944  | 2.03E-07 | -0.260 | -0.212 |  |  |  | <i>RNF215</i>   | TSS1500 |
| cg00050873 | Y  | 9,363,356   | 0.005044 | -0.260 | -0.171 |  |  |  | <i>TSPY4</i>    | Body    |
| cg04184716 | 14 | 75,084,887  | 3.4E-11  | -0.260 | -0.266 |  |  |  |                 |         |
| cg05262224 | 16 | 86,482,459  | 0.0415   | -0.260 | -0.160 |  |  |  |                 |         |
| cg24884217 | 6  | 32,038,155  | 0.000245 | -0.260 | -0.189 |  |  |  | <i>TNXB</i>     | Body    |
| cg20663846 | 17 | 39,254,439  | 4.77E-05 | -0.260 | -0.170 |  |  |  | <i>KRTAP4-8</i> | TSS200  |
| cg24082880 | 2  | 119,496,816 | 0.001512 | -0.260 | -0.214 |  |  |  |                 |         |
| cg26555149 | 3  | 10,011,470  | 2.26E-05 | -0.260 | -0.164 |  |  |  | <i>TMEM111</i>  | Body    |
| cg03603542 | 3  | 192,606,870 | 0.000571 | -0.260 | -0.179 |  |  |  | <i>C3orf59</i>  | Body    |
| cg14817783 | 2  | 170,551,745 | 0.000702 | -0.260 | -0.296 |  |  |  | <i>PHOSPHO2</i> | 5'UTR   |
| cg20608966 | 18 | 74,113,813  | 3.06E-10 | -0.260 | -0.236 |  |  |  | <i>ZNF516</i>   | Body    |
| cg19642505 | 6  | 30,224,156  | 0.000439 | -0.260 | -0.179 |  |  |  |                 |         |
| cg23655769 | 7  | 56,358,512  | 1.82E-09 | -0.260 | -0.221 |  |  |  |                 |         |
| cg10449091 | 7  | 1,783,609   | 1.31E-07 | -0.260 | -0.233 |  |  |  | <i>ELFN1</i>    | 5'UTR   |
| cg02882755 | 6  | 34,100,963  | 0.001153 | -0.260 | -0.231 |  |  |  | <i>GRM4</i>     | 1stExon |
| cg07694806 | 3  | 18,168,406  | 0.00016  | -0.260 | -0.264 |  |  |  |                 |         |
| cg16658337 | 5  | 1,468,749   | 3.33E-06 | -0.260 | -0.193 |  |  |  | <i>LPCAT1</i>   | Body    |
| cg19807836 | 1  | 198,357,038 | 0.004532 | -0.260 | -0.180 |  |  |  |                 |         |
| cg23976846 | 3  | 168,794,896 | 0.000271 | -0.260 | -0.185 |  |  |  |                 |         |
| cg05471509 | 13 | 114,109,420 | 0.040134 | -0.260 | -0.348 |  |  |  |                 |         |
| cg12460175 | 22 | 18,268,062  | 9.36E-05 | -0.260 | -0.257 |  |  |  |                 |         |
| cg20671415 | 1  | 152,976,275 | 0.009515 | -0.260 | -0.178 |  |  |  | <i>SPRR3</i>    | 3'UTR   |
| cg04788987 | 14 | 48,096,041  | 0.015442 | -0.260 | -0.200 |  |  |  | <i>MDGA2</i>    | Body    |
| cg13845858 | 9  | 139,916,992 | 3.8E-05  | -0.260 | -0.254 |  |  |  | <i>ABCA2</i>    | Body    |
| cg22835712 | 2  | 102,737,379 | 1.09E-08 | -0.260 | -0.251 |  |  |  |                 |         |
| cg18049099 | 12 | 124,832,556 | 5.82E-09 | -0.260 | -0.227 |  |  |  | <i>NCOR2</i>    | Body    |
| cg20761853 | 17 | 76,850,198  | 1.03E-08 | -0.260 | -0.259 |  |  |  | <i>TIMP2</i>    | 3'UTR   |
| cg01353670 | 3  | 112,512,556 | 1.84E-07 | -0.260 | -0.286 |  |  |  |                 |         |
| cg05662884 | 2  | 126,595,338 | 0.000735 | -0.260 | -0.239 |  |  |  |                 |         |
| cg22586603 | 8  | 129,985,596 | 0.00113  | -0.260 | -0.241 |  |  |  |                 |         |
| cg02628680 | 6  | 32,015,618  | 3.57E-06 | -0.260 | -0.191 |  |  |  | <i>TNXB</i>     | Body    |

|            |    |             |          |        |        |          |        |     |                 |         |
|------------|----|-------------|----------|--------|--------|----------|--------|-----|-----------------|---------|
| cg07375700 | 1  | 2,013,507   | 4.62E-10 | -0.260 | -0.270 |          |        |     | <i>PRKCZ</i>    | Body    |
| cg02902186 | 8  | 118,683,119 | 0.002821 | -0.260 | -0.234 |          |        |     |                 |         |
| cg06021880 | 12 | 50,105,418  | 2.56E-05 | -0.260 | -0.237 |          |        |     |                 |         |
| cg13787610 | 11 | 78,618,572  | 1.21E-09 | -0.260 | -0.279 |          |        |     | <i>ODZ4</i>     | Body    |
| cg06084312 | 1  | 243,139,525 | 0.001098 | -0.260 | -0.216 |          |        |     |                 |         |
| cg23688713 | 7  | 93,967,090  | 0.006783 | -0.260 | -0.404 |          |        |     |                 |         |
| cg00276455 | 6  | 54,904,638  | 0.002419 | -0.260 | -0.228 |          |        |     |                 |         |
| cg11976592 | 6  | 76,078,187  | 1.61E-07 | -0.260 | -0.269 |          |        |     | <i>FILIP1</i>   | Body    |
| cg23204096 | 6  | 169,768,053 | 0.000108 | -0.260 | -0.192 |          |        |     |                 |         |
| cg16198416 | 4  | 155,669,266 | 0.000308 | -0.260 | -0.152 |          |        |     | <i>LRAT</i>     | Body    |
| cg12990639 | 2  | 119,471,314 | 0.004016 | -0.260 | -0.222 |          |        |     |                 |         |
| cg20554761 | 7  | 38,469,054  | 0.000481 | -0.260 | -0.216 |          |        |     | <i>AMPH</i>     | Body    |
| cg00071727 | 13 | 98,869,894  | 5.91E-06 | -0.260 | -0.247 |          |        |     | <i>FARP1</i>    | Body    |
| cg10090241 | 1  | 15,932,434  | 3.88E-09 | -0.260 | -0.264 |          |        |     |                 |         |
| cg25817165 | 18 | 72,167,213  | 7.12E-07 | -0.260 | -0.201 |          |        |     | <i>CNDP2</i>    | 1stExon |
| cg03862437 | 3  | 194,353,432 | 0.002574 | -0.260 | -0.244 |          |        |     | <i>TMEM44</i>   | Body    |
| cg04367107 | 11 | 88,238,963  | 0.003033 | -0.260 | -0.132 |          |        |     | <i>GRM5</i>     | 3'UTR   |
| cg06747362 | 21 | 26,955,262  | 1.08E-05 | -0.260 | -0.210 |          |        |     | <i>C21orf71</i> | Body    |
| cg17978103 | 20 | 56,272,305  | 1.39E-05 | -0.260 | -0.295 |          |        |     | <i>PMEPA1</i>   | 5'UTR   |
| cg27000831 | 17 | 32,645,748  | 0.001398 | -0.260 | -0.255 | 2.87E-10 | -0.215 |     | <i>CCL8</i>     | TSS1500 |
| cg03142256 | 3  | 75,958,299  | 5.33E-06 | -0.260 | -0.242 |          |        | Yes |                 |         |
| cg03473809 | 4  | 155,672,265 | 3.25E-05 | -0.260 | -0.204 |          |        |     | <i>LRAT</i>     | 3'UTR   |
| cg00781388 | 16 | 86,995,081  | 0.009137 | -0.260 | -0.181 |          |        |     |                 |         |
| cg11019127 | 11 | 115,369,647 | 4.11E-10 | -0.260 | -0.216 |          |        |     | <i>CADM1</i>    | Body    |
| cg12773197 | 13 | 112,238,673 | 0.049058 | -0.261 | -0.074 |          |        |     |                 |         |
| cg25640096 | 6  | 1,374,513   | 1.05E-05 | -0.261 | -0.226 |          |        |     |                 |         |
| cg18394995 | X  | 48,901,652  | 1.16E-10 | -0.261 | -0.246 |          |        |     | <i>TFE3</i>     | TSS1500 |
| cg03043804 | 14 | 96,152,706  | 0.003194 | -0.261 | -0.220 |          |        |     | <i>TCL1B</i>    | TSS200  |
| cg27093637 | 11 | 5,410,452   | 0.00923  | -0.261 | -0.265 |          |        |     | <i>OR51M1</i>   | TSS200  |
| cg02160684 | 8  | 126,448,033 | 9.59E-05 | -0.261 | -0.290 |          |        |     | <i>TRIB1</i>    | Body    |
| cg02195405 | 8  | 7,650,102   | 0.001433 | -0.261 | -0.189 |          |        |     |                 |         |
| cg04421974 | 8  | 134,224,814 | 0.000168 | -0.261 | -0.308 |          |        |     | <i>WISP1</i>    | Body    |
| cg18385570 | 19 | 15,052,282  | 0.007652 | -0.261 | -0.252 |          |        |     | <i>OR7C2</i>    | TSS200  |
| cg09075149 | 5  | 663,895     | 3.64E-06 | -0.261 | -0.197 |          |        |     | <i>TPPP</i>     | 3'UTR   |

|            |    |             |          |        |        |          |        |     |                |         |
|------------|----|-------------|----------|--------|--------|----------|--------|-----|----------------|---------|
| cg16107470 | 5  | 12,865,512  | 2.75E-08 | -0.261 | -0.236 |          |        |     |                |         |
| cg07879977 | 16 | 3,254,567   | 0.002038 | -0.261 | -0.206 | 4.75E-10 | -0.110 |     | <i>OR1F1</i>   | 1stExon |
| cg18578954 | 6  | 28,887,247  | 6.94E-07 | -0.261 | -0.245 |          |        |     | <i>TRIM27</i>  | Body    |
| cg04221650 | 1  | 152,681,887 | 0.002513 | -0.261 | -0.257 |          |        |     | <i>LCE4A</i>   | 1stExon |
| cg24070963 | 6  | 64,734,843  | 0.010158 | -0.261 | -0.222 |          |        |     | <i>EYS</i>     | Body    |
| cg25520146 | 8  | 133,574,073 | 0.028829 | -0.261 | -0.195 |          |        |     | <i>HPYR1</i>   | TSS1500 |
| cg13419214 | Y  | 6,341,961   | 0.001167 | -0.261 | -0.246 |          |        |     | <i>TTY8B</i>   | TSS1500 |
| cg01520297 | 10 | 134,456,336 | 0.00724  | -0.261 | -0.136 |          |        |     | <i>INPP5A</i>  | Body    |
| cg09424682 | 3  | 191,670,257 | 0.007606 | -0.261 | -0.164 |          |        |     |                |         |
| cg08448622 | 6  | 31,026,105  | 0.018796 | -0.261 | -0.149 |          |        |     | <i>HCG22</i>   | Body    |
| cg18815018 | 14 | 22,315,066  | 0.000367 | -0.261 | -0.259 |          |        |     |                |         |
| cg19247310 | 11 | 59,132,298  | 0.005446 | -0.261 | -0.224 |          |        |     | <i>OR5AN1</i>  | 1stExon |
| cg02832905 | 18 | 75,591,983  | 0.020024 | -0.261 | -0.083 |          |        |     |                |         |
| cg06624020 | 19 | 58,632,805  | 0.006117 | -0.261 | -0.216 |          |        |     |                |         |
| cg11346722 | 6  | 34,512,215  | 0.005884 | -0.261 | -0.210 |          |        |     | <i>SPDEF</i>   | Body    |
| cg18577167 | 13 | 74,805,590  | 1.85E-07 | -0.261 | -0.228 |          |        |     |                |         |
| cg20817363 | 8  | 143,560,651 | 2.46E-06 | -0.261 | -0.281 |          |        |     | <i>BAI1</i>    | Body    |
| cg02631868 | 2  | 242,190,788 | 5.39E-07 | -0.261 | -0.229 |          |        |     | <i>HDLBP</i>   | Body    |
| cg04570362 | 1  | 9,871,402   | 7.53E-09 | -0.261 | -0.265 |          |        |     | <i>CLSTN1</i>  | Body    |
| cg04898487 | 16 | 10,272,607  | 0.000218 | -0.261 | -0.214 |          |        |     | <i>GRIN2A</i>  | Body    |
| cg08014964 | 17 | 10,372,972  | 1.36E-07 | -0.261 | -0.268 |          |        |     | <i>MYH4</i>    | TSS200  |
| cg12157582 | 5  | 84,844,201  | 0.02867  | -0.261 | -0.092 |          |        |     |                |         |
| cg18641908 | 1  | 4,129,718   | 9.74E-07 | -0.261 | -0.207 |          |        | Yes |                |         |
| cg07900024 | 20 | 29,896,456  | 0.003959 | -0.261 | -0.154 |          |        |     | <i>DEFB116</i> | TSS200  |
| cg22164891 | 20 | 52,199,729  | 3.98E-11 | -0.261 | -0.276 |          |        |     | <i>ZNF217</i>  | TSS200  |
| cg25377796 | 4  | 8,643,957   | 0.040801 | -0.261 | -0.153 |          |        |     |                |         |
| cg04429994 | 16 | 51,093,890  | 0.003283 | -0.261 | -0.215 |          |        |     |                |         |
| cg26623696 | 11 | 90,797,970  | 0.001135 | -0.261 | -0.158 |          |        |     |                |         |
| cg06787316 | 14 | 52,273,865  | 0.001692 | -0.261 | -0.220 |          |        |     |                |         |
| cg03002968 | 1  | 158,670,397 | 0.009238 | -0.261 | -0.158 |          |        |     | <i>OR6K2</i>   | 1stExon |
| cg25573386 | 12 | 18,890,579  | 0.001271 | -0.261 | -0.318 | 2.7E-10  | -0.183 |     | <i>CAPZA3</i>  | TSS1500 |
| cg11132336 | 7  | 54,705,907  | 0.005893 | -0.261 | -0.180 |          |        |     |                |         |
| cg14128018 | 5  | 4,399,620   | 0.008943 | -0.261 | -0.155 |          |        |     |                |         |
| cg18149307 | 2  | 88,382,160  | 0.004551 | -0.261 | -0.240 |          |        |     | <i>SMYD1</i>   | Body    |

|            |    |             |          |        |        |            |        |  |                  |         |
|------------|----|-------------|----------|--------|--------|------------|--------|--|------------------|---------|
| cg02965283 | 2  | 39,952,015  | 2.09E-12 | -0.261 | -0.252 |            |        |  |                  |         |
| cg26120477 | 10 | 125,367,374 | 0.001598 | -0.261 | -0.246 |            |        |  |                  |         |
| cg20758834 | 4  | 114,262,093 | 0.002415 | -0.261 | -0.131 |            |        |  | <i>ANK2</i>      | Body    |
| cg22228134 | 14 | 25,078,609  | 0.003979 | -0.261 | -0.170 | 0.00201436 | -0.074 |  | <i>GZMH</i>      | Body    |
| cg02122540 | 8  | 142,518,658 | 1.99E-06 | -0.261 | -0.274 |            |        |  | <i>FLJ43860</i>  | TSS1500 |
| cg12510512 | 7  | 1,717,187   | 2.19E-07 | -0.261 | -0.183 |            |        |  |                  |         |
| cg27321439 | 20 | 44,656,559  | 0.002717 | -0.261 | -0.220 |            |        |  | <i>SLC12A5</i>   | TSS1500 |
| cg15615022 | 13 | 19,756,254  | 0.007071 | -0.261 | -0.149 |            |        |  | <i>TUBA3C</i>    | TSS1500 |
| cg01678091 | 15 | 23,890,686  | 7.43E-06 | -0.261 | -0.235 | 3.68E-17   | -0.129 |  | <i>MAGEL2</i>    | 1stExon |
| cg08177968 | 16 | 59,788,728  | 0.017657 | -0.261 | -0.200 |            |        |  | <i>LOC644649</i> | Body    |
| cg26681414 | 1  | 111,934,770 | 3.66E-08 | -0.261 | -0.263 |            |        |  |                  |         |
| cg23594882 | 7  | 54,487,346  | 0.026704 | -0.261 | -0.135 |            |        |  |                  |         |
| cg17144305 | 1  | 233,432,923 | 1.86E-06 | -0.261 | -0.193 |            |        |  | <i>PCNXL2</i>    | TSS1500 |
| cg17473656 | 4  | 190,286,944 | 0.002067 | -0.261 | -0.203 |            |        |  |                  |         |
| cg08235522 | 4  | 5,186,748   | 0.008931 | -0.261 | -0.211 |            |        |  | <i>STK32B</i>    | Body    |
| cg01190800 | 4  | 1,539,702   | 0.000911 | -0.261 | -0.170 |            |        |  |                  |         |
| cg03863499 | 3  | 191,670,165 | 0.006282 | -0.261 | -0.220 |            |        |  |                  |         |
| cg06169041 | 4  | 166,306,860 | 3.02E-06 | -0.261 | -0.223 |            |        |  | <i>MIR578</i>    | TSS1500 |
| cg17488500 | 1  | 154,307,007 | 4.6E-10  | -0.261 | -0.252 |            |        |  | <i>ATP8B2</i>    | Body    |
| cg06646708 | 6  | 18,123,224  | 7.65E-05 | -0.261 | -0.233 |            |        |  | <i>NHLRC1</i>    | TSS1500 |
| cg26554141 | 8  | 111,342,449 | 1.19E-11 | -0.261 | -0.261 |            |        |  |                  |         |
| cg03577128 | 3  | 148,050,624 | 3.74E-06 | -0.261 | -0.226 |            |        |  |                  |         |
| cg07511098 | 13 | 22,494,901  | 4.19E-05 | -0.261 | -0.228 |            |        |  |                  |         |
| cg13048903 | 13 | 21,755,056  | 3.92E-13 | -0.261 | -0.231 |            |        |  |                  |         |
| cg24881910 | 1  | 157,672,074 | 6.55E-05 | -0.261 | -0.247 |            |        |  | <i>FCRL3</i>     | TSS1500 |
| cg03768717 | 12 | 131,787,828 | 0.006263 | -0.261 | -0.170 |            |        |  |                  |         |
| cg25733797 | 11 | 18,033,296  | 3.72E-10 | -0.261 | -0.261 |            |        |  | <i>SERGEF</i>    | Body    |
| cg27534912 | 1  | 158,258,802 | 0.000566 | -0.261 | -0.220 |            |        |  | <i>CD1C</i>      | TSS1500 |
| cg21778835 | 11 | 132,016,192 | 0.001101 | -0.261 | -0.185 |            |        |  | <i>NTM</i>       | Body    |
| cg13089406 | 8  | 89,218,697  | 8.82E-05 | -0.261 | -0.206 |            |        |  | <i>MMP16</i>     | Body    |
| cg27128734 | 19 | 51,411,940  | 2.31E-17 | -0.262 | -0.249 |            |        |  | <i>KLK4</i>      | Body    |
| cg21293902 | 19 | 49,994,097  | 0.000214 | -0.262 | -0.191 |            |        |  | <i>SNORD34</i>   | TSS200  |
| cg25995212 | 2  | 167,342,984 | 0.007144 | -0.262 | -0.210 | 2.56E-08   | -0.187 |  | <i>SCN7A</i>     | 5'UTR   |
| cg15036529 | 1  | 158,900,644 | 0.001354 | -0.262 | -0.298 |            |        |  | <i>PYHIN1</i>    | TSS1500 |

|            |    |             |          |        |        |            |        |     |                   |         |
|------------|----|-------------|----------|--------|--------|------------|--------|-----|-------------------|---------|
| cg23253674 | 6  | 169,287,939 | 2.95E-09 | -0.262 | -0.273 |            |        |     |                   |         |
| cg19159011 | 7  | 50,348,870  | 0.017358 | -0.262 | -0.270 |            |        |     | <i>IKZF1</i>      | 5'UTR   |
| cg27428744 | 16 | 65,508,251  | 0.000674 | -0.262 | -0.186 |            |        |     | <i>LOC283867</i>  | Body    |
| cg00718036 | 4  | 108,745,325 | 9.69E-21 | -0.262 | -0.248 |            |        |     | <i>SGMS2</i>      | TSS1500 |
| cg20283505 | 1  | 175,490,611 | 6.95E-07 | -0.262 | -0.237 |            |        |     | <i>TNR</i>        | 5'UTR   |
| cg16459667 | 5  | 161,124,759 | 0.00624  | -0.262 | -0.226 |            |        |     | <i>GABRA6</i>     | Body    |
| cg14800603 | 5  | 178,424,364 | 0.000452 | -0.262 | -0.174 |            |        |     |                   |         |
| cg08583231 | 4  | 22,999,086  | 0.043434 | -0.262 | -0.144 |            |        |     |                   |         |
| cg05032957 | 11 | 7,869,872   | 0.000169 | -0.262 | -0.242 |            |        |     | <i>OR5E1P</i>     | TSS1500 |
| cg12185975 | 8  | 131,773,696 | 0.001055 | -0.262 | -0.278 |            |        |     |                   |         |
| cg06448442 | 6  | 137,494,919 | 0.005416 | -0.262 | -0.208 |            |        |     | <i>IL22RA2</i>    | TSS200  |
| cg09631175 | 8  | 130,472,165 | 0.013817 | -0.262 | -0.274 |            |        |     |                   |         |
| cg17870569 | 2  | 84,513,930  | 9.35E-07 | -0.262 | -0.259 |            |        |     |                   |         |
| cg15909737 | 3  | 69,811,645  | 6.59E-09 | -0.262 | -0.254 |            |        |     | <i>MITF</i>       | TSS1500 |
| cg03014957 | 20 | 29,956,062  | 0.010379 | -0.262 | -0.095 |            |        |     | <i>DEFB118</i>    | TSS1500 |
| cg07141605 | 12 | 133,005,406 | 1.24E-09 | -0.262 | -0.259 |            |        |     |                   |         |
| cg07344468 | 11 | 127,811,816 | 6.69E-07 | -0.262 | -0.221 |            |        |     |                   |         |
| cg15452017 | 4  | 46,737,312  | 0.003841 | -0.262 | -0.210 |            |        |     | <i>COX7B2</i>     | 5'UTR   |
| cg17928317 | X  | 140,982,278 | 0.030634 | -0.262 | -0.135 |            |        |     | <i>MAGEC3</i>     | Body    |
| cg20678800 | 1  | 115,857,431 | 3.01E-09 | -0.262 | -0.291 |            |        | Yes | <i>NGF</i>        | 5'UTR   |
| cg06201717 | 1  | 2,949,633   | 0.003892 | -0.262 | -0.098 |            |        |     |                   |         |
| cg17651760 | 12 | 9,389,499   | 0.029362 | -0.262 | -0.190 |            |        |     |                   |         |
| cg15604242 | 19 | 11,450,739  | 8.21E-11 | -0.262 | -0.257 |            |        |     | <i>RAB3D</i>      | TSS1500 |
| cg04874562 | 11 | 5,462,540   | 0.000903 | -0.262 | -0.260 |            |        |     | <i>OR51I1</i>     | 1stExon |
| cg15580075 | 11 | 129,871,059 | 8.45E-07 | -0.262 | -0.208 |            |        |     | <i>NCRNA00167</i> | TSS1500 |
| cg18236250 | 4  | 16,791,106  | 0.008526 | -0.262 | -0.200 |            |        |     | <i>LDB2</i>       | Body    |
| cg24787357 | 4  | 39,457,832  | 5.95E-05 | -0.262 | -0.272 |            |        |     | <i>RPL9</i>       | Body    |
| cg23689219 | 1  | 159,408,079 | 6.84E-07 | -0.262 | -0.220 |            |        |     | <i>OR10J1</i>     | TSS1500 |
| cg25516151 | 8  | 18,413,889  | 9.36E-05 | -0.262 | -0.236 |            |        |     | <i>PSD3</i>       | Body    |
| cg16411152 | 4  | 175,839,604 | 0.023887 | -0.262 | -0.160 | 0.00017724 | -0.086 |     | <i>ADAM29</i>     | 1stExon |
| cg22688043 | 11 | 55,944,198  | 0.015075 | -0.262 | -0.167 |            |        | Yes | <i>OR5J2</i>      | 1stExon |
| cg23054121 | 11 | 2,423,159   | 1.85E-06 | -0.262 | -0.265 |            |        |     | <i>TSSC4</i>      | TSS1500 |
| cg07855575 | 5  | 25,393,894  | 5.01E-09 | -0.262 | -0.252 |            |        |     |                   |         |
| cg20147595 | 8  | 110,349,212 | 1.86E-07 | -0.262 | -0.286 |            |        |     | <i>ENY2</i>       | Body    |

|            |    |             |          |        |        |  |  |     |                  |         |
|------------|----|-------------|----------|--------|--------|--|--|-----|------------------|---------|
| cg25403442 | 10 | 134,810,102 | 0.000227 | -0.262 | -0.222 |  |  |     |                  |         |
| cg06233731 | 12 | 18,890,872  | 0.001919 | -0.262 | -0.262 |  |  |     | <i>PLCZ1</i>     | 1stExon |
| cg11708223 | 8  | 6,638,123   | 0.000215 | -0.262 | -0.217 |  |  |     |                  |         |
| cg16013670 | 1  | 241,804,175 | 2.19E-08 | -0.262 | -0.256 |  |  |     | <i>OPN3</i>      | TSS1500 |
| cg23591609 | 12 | 70,092,840  | 8.98E-08 | -0.262 | -0.253 |  |  |     | <i>BEST3</i>     | 5'UTR   |
| cg14258504 | 12 | 49,189,285  | 1.35E-08 | -0.262 | -0.249 |  |  |     |                  |         |
| cg25451456 | 11 | 5,967,520   | 0.000183 | -0.262 | -0.241 |  |  |     | <i>OR56A3</i>    | TSS1500 |
| cg06705862 | 3  | 128,151,236 | 1.18E-05 | -0.262 | -0.273 |  |  |     |                  |         |
| cg05530612 | 10 | 125,618,545 | 0.000232 | -0.262 | -0.203 |  |  |     | <i>CPXM2</i>     | Body    |
| cg00250645 | 8  | 72,534,391  | 0.017828 | -0.262 | -0.134 |  |  |     |                  |         |
| cg00894567 | 10 | 44,670,010  | 0.00046  | -0.262 | -0.226 |  |  |     |                  |         |
| cg19554569 | 11 | 5,364,833   | 0.002303 | -0.262 | -0.242 |  |  |     | <i>OR51B5</i>    | TSS200  |
| cg23602690 | 11 | 122,010,222 | 1.49E-06 | -0.262 | -0.268 |  |  |     | <i>LOC399959</i> | Body    |
| cg19812613 | 3  | 108,672,872 | 0.014848 | -0.262 | -0.163 |  |  |     | <i>GUCA1C</i>    | TSS200  |
| cg09923769 | 16 | 9,918,288   | 0.007942 | -0.262 | -0.287 |  |  |     | <i>GRIN2A</i>    | Body    |
| cg02635786 | 10 | 115,939,284 | 0.019314 | -0.262 | -0.373 |  |  |     | <i>TDRD1</i>     | 5'UTR   |
| cg23934819 | 11 | 124,788,965 | 2.37E-06 | -0.262 | -0.271 |  |  | Yes | <i>HEPN1</i>     | TSS200  |
| cg00423453 | 11 | 5,372,944   | 0.005057 | -0.262 | -0.255 |  |  |     | <i>OR51B6</i>    | 1stExon |
| cg12448298 | 2  | 115,822,039 | 0.011859 | -0.262 | -0.200 |  |  |     | <i>DPP10</i>     | Body    |
| cg18444099 | 7  | 154,703,905 | 1.08E-10 | -0.262 | -0.250 |  |  |     |                  |         |
| cg21179255 | X  | 152,772,707 | 7.63E-08 | -0.262 | -0.232 |  |  |     | <i>BGN</i>       | Body    |
| cg10440524 | 10 | 83,728,257  | 1.17E-05 | -0.262 | -0.215 |  |  |     | <i>NRG3</i>      | Body    |
| cg13088038 | 2  | 113,923,196 | 5.27E-05 | -0.262 | -0.315 |  |  |     | <i>LOC440839</i> | Body    |
| cg13115222 | 1  | 203,670,963 | 1.24E-10 | -0.262 | -0.242 |  |  |     | <i>ATP2B4</i>    | Body    |
| cg01129320 | 13 | 102,064,942 | 0.003457 | -0.262 | -0.104 |  |  |     | <i>NALCN</i>     | 5'UTR   |
| cg02313922 | 3  | 59,560,961  | 1.46E-09 | -0.262 | -0.266 |  |  |     |                  |         |
| cg09299053 | 7  | 57,509,762  | 0.044327 | -0.262 | -0.136 |  |  |     | <i>ZNF716</i>    | TSS200  |
| cg27497038 | 10 | 125,401,743 | 2.44E-05 | -0.262 | -0.202 |  |  |     |                  |         |
| cg09169356 | 10 | 2,323,382   | 0.003065 | -0.263 | -0.210 |  |  |     |                  |         |
| cg13416109 | 16 | 33,259,538  | 0.004089 | -0.263 | -0.195 |  |  |     | <i>TP53TG3B</i>  | TSS1500 |
| cg21140628 | 1  | 153,351,569 | 0.008944 | -0.263 | -0.126 |  |  |     |                  |         |
| cg26893816 | 5  | 33,997,223  | 0.035889 | -0.263 | -0.214 |  |  |     | <i>AMACR</i>     | Body    |
| cg01349088 | 20 | 30,012,193  | 0.001044 | -0.263 | -0.267 |  |  |     | <i>DEFB122</i>   | Body    |
| cg19157199 | 6  | 155,777,867 | 0.000288 | -0.263 | -0.188 |  |  |     | <i>NOX3</i>      | TSS1500 |

|            |    |             |          |        |        |  |  |     |                  |         |
|------------|----|-------------|----------|--------|--------|--|--|-----|------------------|---------|
| cg23545828 | 10 | 125,454,530 | 0.00053  | -0.263 | -0.203 |  |  |     | <i>GPR26</i>     | 3'UTR   |
| cg06084210 | 13 | 103,754,324 | 0.02183  | -0.263 | -0.232 |  |  |     |                  |         |
| cg16922523 | 11 | 115,292,945 | 1.46E-05 | -0.263 | -0.239 |  |  |     | <i>CADM1</i>     | Body    |
| cg08417857 | 13 | 102,057,990 | 0.000226 | -0.263 | -0.209 |  |  |     | <i>NALCN</i>     | 5'UTR   |
| cg16486109 | 11 | 613,632     | 1.97E-07 | -0.263 | -0.268 |  |  |     | <i>IRF7</i>      | Body    |
| cg01708091 | 6  | 28,552,674  | 0.007153 | -0.263 | -0.162 |  |  |     | <i>SCAND3</i>    | Body    |
| cg08748890 | 11 | 127,063,061 | 0.008436 | -0.263 | -0.230 |  |  |     |                  |         |
| cg24015747 | 19 | 4,323,081   | 0.00309  | -0.263 | -0.342 |  |  |     | <i>FSD1</i>      | Body    |
| cg26673722 | 4  | 68,776,652  | 1.4E-09  | -0.263 | -0.214 |  |  |     | <i>TMPRSS11A</i> | 3'UTR   |
| cg00372249 | 4  | 185,745,711 | 5.71E-05 | -0.263 | -0.241 |  |  |     | <i>ACSL1</i>     | 5'UTR   |
| cg02919712 | 8  | 120,885,511 | 1.84E-08 | -0.263 | -0.265 |  |  |     | <i>DEPDC6</i>    | TSS1500 |
| cg08290845 | 20 | 30,065,523  | 0.009614 | -0.263 | -0.203 |  |  |     | <i>REM1</i>      | Body    |
| cg04317344 | 13 | 113,426,023 | 3.27E-06 | -0.263 | -0.235 |  |  |     | <i>ATP11A</i>    | Body    |
| cg20826576 | 1  | 170,636,223 | 0.000645 | -0.263 | -0.250 |  |  |     | <i>PRRX1</i>     | Body    |
| cg06246646 | 8  | 114,992,667 | 0.005863 | -0.263 | -0.243 |  |  |     |                  |         |
| cg00005166 | 16 | 3,264,442   | 0.000106 | -0.263 | -0.217 |  |  |     | <i>OR1F2P</i>    | TSS1500 |
| cg01446270 | 16 | 7,570,558   | 0.000533 | -0.263 | -0.221 |  |  |     | <i>A2BP1</i>     | Body    |
| cg17005937 | 4  | 190,529,320 | 4.88E-05 | -0.263 | -0.230 |  |  |     |                  |         |
| cg27167613 | 19 | 42,569,967  | 0.004461 | -0.263 | -0.168 |  |  |     | <i>GRIK5</i>     | TSS200  |
| cg24946204 | 5  | 177,020,109 | 3.47E-05 | -0.263 | -0.195 |  |  |     | <i>TMED9</i>     | Body    |
| cg23914535 | 11 | 87,885,119  | 0.006967 | -0.263 | -0.127 |  |  |     | <i>RAB38</i>     | Body    |
| cg04029738 | 17 | 80,049,290  | 8.36E-09 | -0.263 | -0.223 |  |  |     | <i>FASN</i>      | Body    |
| cg08550748 | 6  | 66,999,374  | 0.010967 | -0.263 | -0.205 |  |  | Yes |                  |         |
| cg17019184 | 10 | 133,508,039 | 0.019415 | -0.263 | -0.168 |  |  |     |                  |         |
| cg03773636 | 3  | 192,769,633 | 0.010982 | -0.263 | -0.163 |  |  |     |                  |         |
| cg07469742 | 12 | 132,113,315 | 4.54E-05 | -0.263 | -0.217 |  |  |     |                  |         |
| cg10944063 | 2  | 120,233,706 | 5.09E-08 | -0.263 | -0.240 |  |  |     | <i>SCTR</i>      | Body    |
| cg26574247 | 17 | 77,712,786  | 3.65E-05 | -0.263 | -0.225 |  |  |     | <i>ENPP7</i>     | 3'UTR   |
| cg24956176 | 17 | 33,542,219  | 1.69E-05 | -0.263 | -0.242 |  |  |     |                  |         |
| cg06992213 | 6  | 22,718,574  | 7.55E-10 | -0.263 | -0.269 |  |  |     |                  |         |
| cg14662886 | 3  | 39,450,018  | 6.93E-09 | -0.263 | -0.259 |  |  |     | <i>SNORA6</i>    | Body    |
| cg18766791 | 7  | 64,295,458  | 6.9E-06  | -0.264 | -0.258 |  |  |     |                  |         |
| cg12713040 | 20 | 62,562,546  | 0.012945 | -0.264 | -0.352 |  |  |     | <i>DNAJC5</i>    | Body    |
| cg23302998 | 17 | 31,888,899  | 7.34E-12 | -0.264 | -0.203 |  |  |     | <i>ACCN1</i>     | Body    |



|            |    |             |          |        |        |          |        |     |                 |         |
|------------|----|-------------|----------|--------|--------|----------|--------|-----|-----------------|---------|
| cg17928916 | 17 | 80,041,824  | 0.004473 | -0.264 | -0.130 |          |        |     | <i>FASN</i>     | Body    |
| cg06588841 | 4  | 150,737,126 | 7.52E-05 | -0.264 | -0.257 |          |        |     |                 |         |
| cg18423626 | 13 | 47,994,694  | 6.69E-05 | -0.264 | -0.281 |          |        |     |                 |         |
| cg15203028 | 11 | 1,029,188   | 1.75E-06 | -0.264 | -0.193 |          |        |     | <i>MUC6</i>     | Body    |
| cg13155823 | 8  | 80,993,721  | 6.86E-13 | -0.264 | -0.253 |          |        |     | <i>TPD52</i>    | Body    |
| cg00669774 | 12 | 127,768,788 | 0.007208 | -0.264 | -0.179 |          |        |     |                 |         |
| cg03301433 | 2  | 242,617,946 | 9.67E-06 | -0.264 | -0.267 |          |        |     | <i>DTYMK</i>    | Body    |
| cg10736337 | 19 | 1,439,980   | 9.82E-14 | -0.264 | -0.279 |          |        |     | <i>RPS15</i>    | Body    |
| cg09387970 | 11 | 55,433,005  | 0.00012  | -0.264 | -0.245 |          |        |     | <i>OR4C6</i>    | 1stExon |
| cg13917614 | 17 | 40,125,660  | 4.78E-06 | -0.264 | -0.228 |          |        |     | <i>CNP</i>      | Body    |
| cg01291204 | 16 | 85,670,348  | 0.016061 | -0.264 | -0.143 |          |        |     | <i>KIAA0182</i> | 5'UTR   |
| cg25277462 | 4  | 137,199,590 | 0.000141 | -0.264 | -0.203 |          |        | Yes |                 |         |
| cg02897974 | 13 | 112,673,923 | 0.031469 | -0.264 | -0.071 |          |        |     |                 |         |
| cg25104107 | 1  | 152,731,590 | 3.27E-09 | -0.264 | -0.247 |          |        |     | <i>KPRP</i>     | 5'UTR   |
| cg24119717 | 5  | 139,488,731 | 0.002019 | -0.264 | -0.213 |          |        |     |                 |         |
| cg27160556 | 11 | 124,181,099 | 9.68E-06 | -0.264 | -0.264 |          |        |     | <i>OR8D1</i>    | TSS1500 |
| cg09090733 | 16 | 32,473,096  | 0.000103 | -0.264 | -0.231 |          |        |     |                 |         |
| cg00186207 | 2  | 134,788,575 | 0.005981 | -0.264 | -0.209 |          |        |     |                 |         |
| cg13007502 | 2  | 208,795,771 | 1.69E-05 | -0.264 | -0.275 |          |        |     | <i>PLEKHM3</i>  | Body    |
| cg07378350 | 20 | 34,027,324  | 1.27E-05 | -0.264 | -0.275 | 2.13E-19 | -0.191 |     | <i>GDF5</i>     | TSS1500 |
| cg23178069 | 11 | 21,043,240  | 0.003065 | -0.264 | -0.242 |          |        |     | <i>NELL1</i>    | Body    |
| cg18114036 | 1  | 156,260,918 | 2.54E-11 | -0.264 | -0.275 |          |        |     | <i>TMEM79</i>   | Body    |
| cg23468045 | 5  | 12,669,584  | 0.00439  | -0.264 | -0.215 |          |        |     |                 |         |
| cg02965157 | 1  | 40,350,001  | 6.19E-06 | -0.264 | -0.226 |          |        |     | <i>TRIT1</i>    | TSS1500 |
| cg02406469 | 15 | 83,381,070  | 0.000418 | -0.264 | -0.203 |          |        |     |                 |         |
| cg07241457 | 20 | 61,787,786  | 0.012097 | -0.264 | -0.243 |          |        |     |                 |         |
| cg08009265 | 1  | 153,044,457 | 0.030162 | -0.264 | -0.198 |          |        |     | <i>SPRR2B</i>   | TSS1500 |
| cg09610558 | 16 | 87,102,113  | 0.010644 | -0.264 | -0.117 |          |        |     |                 |         |
| cg22476960 | 11 | 124,134,914 | 4.61E-12 | -0.264 | -0.265 |          |        |     | <i>OR8G1</i>    | Body    |
| cg03188793 | 11 | 755,658     | 3.25E-07 | -0.264 | -0.277 |          |        |     | <i>TALDO1</i>   | Body    |
| cg27015884 | 8  | 64,349,529  | 0.000758 | -0.264 | -0.220 |          |        |     |                 |         |
| cg14662728 | 8  | 32,578,937  | 0.0004   | -0.264 | -0.188 |          |        |     | <i>NRG1</i>     | Body    |
| cg06395652 | 10 | 55,568,997  | 0.009829 | -0.264 | -0.221 |          |        |     | <i>PCDH15</i>   | 3'UTR   |
| cg15705971 | 11 | 92,110,262  | 1.32E-06 | -0.264 | -0.289 |          |        |     | <i>FAT3</i>     | Body    |

|            |    |             |          |        |        |            |        |  |                  |         |
|------------|----|-------------|----------|--------|--------|------------|--------|--|------------------|---------|
| cg20100668 | 8  | 88,885,469  | 0.022797 | -0.264 | -0.225 |            |        |  | <i>DCAF4L2</i>   | 1stExon |
| cg26595909 | 6  | 32,946,524  | 1.09E-05 | -0.264 | -0.309 |            |        |  | <i>BRD2</i>      | Body    |
| cg02172216 | 10 | 131,514,248 | 8.97E-08 | -0.264 | -0.279 |            |        |  | <i>MGMT</i>      | Body    |
| cg11549848 | 13 | 24,464,707  | 6.89E-06 | -0.264 | -0.254 |            |        |  | <i>PCOTH</i>     | 5'UTR   |
| cg01836096 | 8  | 145,578,603 | 1.85E-05 | -0.264 | -0.183 |            |        |  | <i>C8ORFK29</i>  | TSS200  |
| cg02028524 | 14 | 92,573,410  | 2.66E-08 | -0.264 | -0.242 |            |        |  | <i>ATXN3</i>     | TSS1500 |
| cg11123303 | 6  | 132,946,216 | 0.000128 | -0.264 | -0.248 |            |        |  | <i>TAAR2</i>     | TSS1500 |
| cg00320138 | 11 | 124,181,369 | 0.015362 | -0.264 | -0.161 |            |        |  | <i>OR8D1</i>     | TSS1500 |
| cg25536171 | 13 | 108,535,144 | 0.000108 | -0.264 | -0.260 |            |        |  |                  |         |
| cg27638035 | 18 | 35,015,753  | 0.000153 | -0.264 | -0.225 |            |        |  | <i>BRUNOL4</i>   | Body    |
| cg10260050 | 11 | 118,415,431 | 4.79E-05 | -0.264 | -0.259 |            |        |  | <i>C11orf60</i>  | 3'UTR   |
| cg19922435 | 4  | 124,694,178 | 8.82E-07 | -0.264 | -0.285 |            |        |  | <i>LOC285419</i> | Body    |
| cg21052677 | 7  | 32,471,406  | 1.47E-05 | -0.264 | -0.204 |            |        |  |                  |         |
| cg23400451 | 17 | 10,373,728  | 3.88E-05 | -0.264 | -0.259 | 0.00000313 | -0.154 |  | <i>MYH4</i>      | TSS1500 |
| cg25030694 | 2  | 134,329,911 | 0.000158 | -0.264 | -0.350 |            |        |  |                  |         |
| cg17079497 | 10 | 53,655,621  | 0.030816 | -0.264 | -0.199 |            |        |  | <i>PRKG1</i>     | Body    |
| cg19761458 | 7  | 54,766,273  | 0.005386 | -0.264 | -0.147 |            |        |  |                  |         |
| cg11385938 | 7  | 6,432,590   | 0.000585 | -0.264 | -0.286 |            |        |  | <i>RAC1</i>      | Body    |
| cg09453685 | 2  | 56,318,438  | 0.001856 | -0.264 | -0.216 |            |        |  |                  |         |
| cg06077224 | 7  | 977,136     | 0.000137 | -0.264 | -0.192 |            |        |  | <i>ADAP1</i>     | Body    |
| cg19345277 | 19 | 57,646,138  | 2.07E-05 | -0.264 | -0.205 |            |        |  | <i>ZIM3</i>      | 3'UTR   |
| cg25815219 | 7  | 31,827,390  | 5.21E-05 | -0.264 | -0.234 |            |        |  |                  |         |
| cg17580416 | 6  | 44,217,559  | 5.19E-11 | -0.264 | -0.251 |            |        |  | <i>HSP90AB1</i>  | Body    |
| cg07747690 | 3  | 168,268,757 | 0.038504 | -0.264 | -0.112 |            |        |  | <i>MIR551B</i>   | TSS1500 |
| cg16341056 | X  | 151,286,548 | 5.72E-06 | -0.264 | -0.253 |            |        |  | <i>MAGEA5</i>    | TSS200  |
| cg09691862 | 11 | 90,705,491  | 0.023485 | -0.264 | -0.146 |            |        |  |                  |         |
| cg16061228 | 11 | 118,014,547 | 3.24E-12 | -0.264 | -0.215 |            |        |  | <i>SCN4B</i>     | Body    |
| cg03221073 | 1  | 186,157,555 | 0.001234 | -0.264 | -0.248 |            |        |  | <i>HMCN1</i>     | Body    |
| cg01250845 | 11 | 82,708,076  | 1.44E-05 | -0.264 | -0.303 |            |        |  | <i>RAB30</i>     | Body    |
| cg14650116 | 9  | 140,112,941 | 3.78E-16 | -0.265 | -0.249 |            |        |  | <i>NDOR1</i>     | 3'UTR   |
| cg27418402 | 3  | 64,008,161  | 0.000625 | -0.265 | -0.324 |            |        |  | <i>PSMD6</i>     | Body    |
| cg01460430 | 8  | 79,885,164  | 2.71E-09 | -0.265 | -0.231 |            |        |  |                  |         |
| cg04261529 | 5  | 82,726,149  | 3.77E-10 | -0.265 | -0.219 |            |        |  |                  |         |
| cg16182465 | 11 | 76,371,946  | 4.67E-08 | -0.265 | -0.229 |            |        |  | <i>LRR32</i>     | Body    |

|            |    |             |          |        |        |  |  |  |                     |         |
|------------|----|-------------|----------|--------|--------|--|--|--|---------------------|---------|
| cg09397692 | 19 | 51,304,172  | 1.06E-10 | -0.265 | -0.226 |  |  |  | <i>SNORD88A</i>     | TSS1500 |
| cg13674249 | 9  | 86,321,038  | 7.06E-08 | -0.265 | -0.268 |  |  |  | <i>UBQLN1</i>       | Body    |
| cg01889899 | 15 | 101,922,827 | 1.73E-07 | -0.265 | -0.288 |  |  |  | <i>PCSK6</i>        | Body    |
| cg07796335 | 4  | 59,167,549  | 5.17E-10 | -0.265 | -0.266 |  |  |  |                     |         |
| cg00909094 | 3  | 12,586,368  | 2.35E-06 | -0.265 | -0.274 |  |  |  |                     |         |
| cg19679302 | 7  | 81,238,309  | 0.00034  | -0.265 | -0.220 |  |  |  |                     |         |
| cg25997796 | 10 | 53,350,074  | 0.003483 | -0.265 | -0.190 |  |  |  | <i>PRKG1</i>        | Body    |
| cg05378695 | Y  | 9,528,418   | 0.001691 | -0.265 | -0.243 |  |  |  | <i>TTY8</i>         | TSS1500 |
| cg26631397 | 2  | 11,682,864  | 0.023141 | -0.265 | -0.148 |  |  |  | <i>GREB1</i>        | 5'UTR   |
| cg18478850 | 5  | 176,982,070 | 0.00056  | -0.265 | -0.254 |  |  |  | <i>FAM193B</i>      | TSS1500 |
| cg03011928 | 16 | 83,023,240  | 0.002577 | -0.265 | -0.312 |  |  |  | <i>CDH13</i>        | Body    |
| cg10976778 | 17 | 76,989,832  | 0.009356 | -0.265 | -0.174 |  |  |  | <i>CANT1</i>        | Body    |
| cg00288844 | 16 | 11,835,360  | 4.57E-12 | -0.265 | -0.278 |  |  |  | <i>TXNDC11</i>      | Body    |
| cg12346967 | 21 | 32,185,331  | 0.00667  | -0.265 | -0.163 |  |  |  | <i>KRTAP8-1</i>     | 1stExon |
| cg21338153 | 6  | 148,880,579 | 1.21E-11 | -0.265 | -0.232 |  |  |  |                     |         |
| cg07082358 | 7  | 102,981,127 | 2.71E-06 | -0.265 | -0.266 |  |  |  | <i>DNAJC2</i>       | Body    |
| cg24775180 | 12 | 132,423,699 | 5.48E-07 | -0.265 | -0.230 |  |  |  | <i>PUS1</i>         | Body    |
| cg16599983 | 6  | 32,168,969  | 3.06E-12 | -0.265 | -0.214 |  |  |  | <i>NOTCH4</i>       | Body    |
| cg22198397 | 19 | 15,067,457  | 0.000152 | -0.265 | -0.258 |  |  |  | <i>SLC1A6</i>       | Body    |
| cg22759800 | 15 | 27,787,026  | 0.005508 | -0.265 | -0.345 |  |  |  |                     |         |
| cg05432034 | 16 | 86,743,939  | 0.012333 | -0.265 | -0.185 |  |  |  |                     |         |
| cg25832529 | X  | 77,915,772  | 0.002039 | -0.265 | -0.260 |  |  |  | <i>ZCCHC5</i>       | TSS1500 |
| cg20137179 | 1  | 158,327,383 | 0.011701 | -0.265 | -0.194 |  |  |  |                     |         |
| cg26303229 | 11 | 131,626,205 | 0.020521 | -0.265 | -0.226 |  |  |  | <i>NTM</i>          | Body    |
| cg00127070 | 8  | 119,011,673 | 3.65E-08 | -0.265 | -0.278 |  |  |  | <i>EXT1</i>         | Body    |
| cg13496251 | 1  | 147,401,791 | 3.68E-20 | -0.265 | -0.234 |  |  |  | <i>GPR89B</i>       | Body    |
| cg05497273 | 16 | 6,530,373   | 0.006148 | -0.265 | -0.247 |  |  |  | <i>A2BP1</i>        | 5'UTR   |
| cg09758490 | 4  | 1,198,524   | 0.023741 | -0.265 | -0.314 |  |  |  | <i>LOC100130872</i> | Body    |
| cg19175742 | 15 | 83,331,452  | 7.26E-06 | -0.265 | -0.191 |  |  |  | <i>AP3B2</i>        | Body    |
| cg01651728 | X  | 145,076,186 | 0.005067 | -0.265 | -0.258 |  |  |  | <i>MIR890</i>       | TSS1500 |
| cg11261655 | 11 | 123,988,417 | 0.001694 | -0.265 | -0.285 |  |  |  | <i>VWA5A</i>        | Body    |
| cg04956485 | 11 | 5,510,396   | 0.014137 | -0.265 | -0.176 |  |  |  | <i>OR52D1</i>       | 1stExon |
| cg01615475 | 11 | 50,227,199  | 0.005408 | -0.265 | -0.178 |  |  |  |                     |         |
| cg13271206 | 11 | 75,109,830  | 3.67E-05 | -0.265 | -0.189 |  |  |  | <i>RPS3</i>         | TSS1500 |

|            |    |             |          |        |        |  |  |  |                |         |
|------------|----|-------------|----------|--------|--------|--|--|--|----------------|---------|
| cg02634141 | X  | 146,313,213 | 9.91E-05 | -0.265 | -0.274 |  |  |  | <i>MIR507</i>  | TSS1500 |
| cg20100745 | 8  | 134,307,728 | 1.7E-06  | -0.265 | -0.283 |  |  |  | <i>NDRG1</i>   | 5'UTR   |
| cg21079591 | 6  | 31,510,735  | 1.69E-09 | -0.265 | -0.266 |  |  |  | <i>BAT1</i>    | TSS1500 |
| cg06708331 | 22 | 49,761,906  | 4.76E-05 | -0.265 | -0.273 |  |  |  |                |         |
| cg01397223 | 5  | 85,756,331  | 1.04E-06 | -0.265 | -0.237 |  |  |  |                |         |
| cg08835992 | 11 | 7,870,404   | 0.02709  | -0.265 | -0.167 |  |  |  | <i>OR5E1P</i>  | TSS200  |
| cg17114501 | 10 | 59,066,158  | 0.000359 | -0.265 | -0.245 |  |  |  |                |         |
| cg17200850 | 5  | 175,107,097 | 1.26E-08 | -0.265 | -0.245 |  |  |  | <i>HRH2</i>    | 5'UTR   |
| cg25201707 | 1  | 246,772,605 | 4.49E-18 | -0.265 | -0.235 |  |  |  | <i>CNST</i>    | Body    |
| cg06614284 | 20 | 30,689,432  | 6.89E-05 | -0.265 | -0.261 |  |  |  | <i>HCK</i>     | 3'UTR   |
| cg06839417 | 3  | 149,106,151 | 5.9E-06  | -0.265 | -0.212 |  |  |  |                |         |
| cg18282099 | 11 | 131,965,129 | 0.001069 | -0.265 | -0.261 |  |  |  | <i>NTM</i>     | Body    |
| cg05513274 | 12 | 114,212,759 | 0.001397 | -0.265 | -0.241 |  |  |  |                |         |
| cg07576186 | 3  | 58,413,668  | 0.000374 | -0.265 | -0.223 |  |  |  | <i>PDHB</i>    | 3'UTR   |
| cg21512324 | 8  | 89,718,417  | 0.002926 | -0.265 | -0.160 |  |  |  |                |         |
| cg18755094 | 19 | 35,940,593  | 7.03E-07 | -0.265 | -0.248 |  |  |  | <i>FFAR2</i>   | TSS200  |
| cg08893109 | 7  | 6,313,050   | 1.65E-10 | -0.265 | -0.274 |  |  |  | <i>CYTH3</i>   | TSS1500 |
| cg08937612 | 1  | 159,833,713 | 6.93E-10 | -0.265 | -0.226 |  |  |  | <i>VSIG8</i>   | TSS1500 |
| cg20335425 | 1  | 153,363,264 | 5.18E-10 | -0.265 | -0.203 |  |  |  | <i>S100A8</i>  | 5'UTR   |
| cg24809269 | 17 | 74,260,692  | 0.000988 | -0.265 | -0.262 |  |  |  | <i>FAM100B</i> | TSS1500 |
| cg11406765 | 11 | 980,039     | 0.033556 | -0.265 | -0.324 |  |  |  | <i>AP2A2</i>   | Body    |
| cg26852437 | 11 | 29,327,844  | 0.000206 | -0.265 | -0.214 |  |  |  |                |         |
| cg21499078 | 6  | 58,399,664  | 0.000168 | -0.265 | -0.279 |  |  |  |                |         |
| cg02579332 | 7  | 154,875,967 | 0.023705 | -0.266 | -0.173 |  |  |  | <i>HTR5A</i>   | Body    |
| cg04933601 | 1  | 74,945,347  | 0.0043   | -0.266 | -0.157 |  |  |  | <i>TNNI3K</i>  | Body    |
| cg16549644 | 17 | 79,652,024  | 8.46E-07 | -0.266 | -0.268 |  |  |  | <i>ARL16</i>   | TSS1500 |
| cg24923953 | 4  | 72,996,777  | 0.006129 | -0.266 | -0.213 |  |  |  | <i>NPFFR2</i>  | Body    |
| cg12861622 | 8  | 47,761,906  | 1.28E-05 | -0.266 | -0.262 |  |  |  | <i>BEYLA</i>   | Body    |
| cg13016851 | 7  | 56,295,392  | 1.5E-09  | -0.266 | -0.235 |  |  |  |                |         |
| cg09249101 | 17 | 74,520,697  | 7.52E-10 | -0.266 | -0.260 |  |  |  |                |         |
| cg04548327 | 8  | 71,716,525  | 0.002484 | -0.266 | -0.266 |  |  |  |                |         |
| cg09840386 | 17 | 79,058,751  | 4.31E-11 | -0.266 | -0.253 |  |  |  | <i>BAIAP2</i>  | Body    |
| cg18987103 | 11 | 134,338,443 | 0.003846 | -0.266 | -0.159 |  |  |  |                |         |
| cg24926465 | 3  | 156,007,787 | 0.000262 | -0.266 | -0.163 |  |  |  | <i>KCNAB1</i>  | TSS1500 |

|            |    |             |          |        |        |          |        |     |                  |         |
|------------|----|-------------|----------|--------|--------|----------|--------|-----|------------------|---------|
| cg18232313 | 6  | 18,123,232  | 0.00027  | -0.266 | -0.236 |          |        |     | <i>NHLRC1</i>    | TSS1500 |
| cg11975980 | 6  | 54,173,316  | 0.027633 | -0.266 | -0.165 |          |        |     | <i>TINAG</i>     | 1stExon |
| cg13546514 | 3  | 9,712,113   | 3.1E-13  | -0.266 | -0.247 |          |        |     | <i>MTMR14</i>    | Body    |
| cg19142553 | 7  | 26,236,069  | 5.35E-12 | -0.266 | -0.251 |          |        |     | <i>HNRNPA2B1</i> | Body    |
| cg20099511 | 7  | 62,904,398  | 0.000155 | -0.266 | -0.205 |          |        |     |                  |         |
| cg23537659 | 12 | 127,545,067 | 0.002134 | -0.266 | -0.206 |          |        |     |                  |         |
| cg19510698 | 15 | 101,421,249 | 1.54E-13 | -0.266 | -0.253 | 4.14E-15 | -0.143 |     | <i>ALDH1A3</i>   | Body    |
| cg16177440 | 7  | 100,275,304 | 1.54E-06 | -0.266 | -0.211 |          |        |     | <i>GNB2</i>      | Body    |
| cg27600794 | 10 | 118,349,430 | 4.91E-11 | -0.266 | -0.278 |          |        |     | <i>PNLIPRP1</i>  | TSS1500 |
| cg07134266 | 13 | 112,886,222 | 0.024914 | -0.266 | -0.144 |          |        |     |                  |         |
| cg16154462 | 15 | 37,783,120  | 0.002251 | -0.266 | -0.296 |          |        |     |                  |         |
| cg03507064 | 3  | 84,259,272  | 3.83E-05 | -0.266 | -0.288 |          |        |     |                  |         |
| cg26094484 | 10 | 133,318,755 | 0.000424 | -0.266 | -0.195 |          |        |     |                  |         |
| cg19710323 | 12 | 34,499,253  | 0.000212 | -0.266 | -0.243 |          |        |     |                  |         |
| cg22660609 | 4  | 132,984,188 | 0.020036 | -0.266 | -0.229 |          |        |     |                  |         |
| cg26043322 | 1  | 159,507,162 | 9.95E-05 | -0.266 | -0.216 |          |        |     | <i>OR10J5</i>    | TSS1500 |
| cg00866836 | 2  | 58,662,766  | 0.001105 | -0.266 | -0.211 |          |        |     |                  |         |
| cg17520000 | 10 | 5,203,419   | 0.000136 | -0.266 | -0.265 |          |        |     | <i>AKR1CL1</i>   | Body    |
| cg05503824 | 3  | 193,097,879 | 0.001484 | -0.266 | -0.169 |          |        |     | <i>ATP13A5</i>   | TSS1500 |
| cg01012836 | 12 | 125,810,767 | 0.022033 | -0.266 | -0.215 |          |        | Yes | <i>TMEM132B</i>  | TSS1500 |
| cg25304405 | 17 | 32,485,152  | 4.56E-06 | -0.266 | -0.246 |          |        |     | <i>ACCN1</i>     | TSS1500 |
| cg00954545 | 8  | 91,735,520  | 0.000358 | -0.266 | -0.266 |          |        |     |                  |         |
| cg10111664 | 3  | 112,504,720 | 1.61E-05 | -0.266 | -0.238 |          |        |     |                  |         |
| cg13869366 | 11 | 7,869,666   | 1.9E-09  | -0.266 | -0.248 |          |        |     | <i>OR5E1P</i>    | TSS1500 |
| cg15534052 | 18 | 13,871,104  | 0.000973 | -0.266 | -0.266 |          |        |     |                  |         |
| cg02902946 | 20 | 57,617,168  | 3.05E-09 | -0.266 | -0.270 |          |        |     | <i>SLMO2</i>     | Body    |
| cg12958569 | 18 | 49,146,678  | 0.000273 | -0.266 | -0.218 |          |        |     |                  |         |
| cg16372048 | 10 | 26,214,594  | 0.001986 | -0.266 | -0.169 |          |        |     |                  |         |
| cg02511531 | 11 | 55,652,114  | 0.000963 | -0.266 | -0.261 |          |        |     | <i>SPRYD5</i>    | 5'UTR   |
| cg09533145 | 5  | 178,563,145 | 1.35E-08 | -0.266 | -0.228 |          |        |     | <i>ADAMTS2</i>   | Body    |
| cg26551791 | X  | 145,076,879 | 0.000786 | -0.266 | -0.247 |          |        |     | <i>MIR888</i>    | TSS1500 |
| cg02749752 | 6  | 30,176,093  | 6.76E-11 | -0.266 | -0.281 |          |        |     | <i>TRIM26</i>    | 5'UTR   |
| cg07680368 | 11 | 109,172,798 | 3.5E-05  | -0.266 | -0.243 |          |        |     |                  |         |
| cg19539556 | 11 | 55,110,562  | 0.001485 | -0.266 | -0.183 |          |        |     | <i>OR4A16</i>    | TSS200  |

|            |    |             |          |        |        |  |     |  |                 |         |
|------------|----|-------------|----------|--------|--------|--|-----|--|-----------------|---------|
| cg25210884 | 7  | 32,091,043  | 0.003546 | -0.266 | -0.164 |  |     |  | <i>PDE1C</i>    | Body    |
| cg02478603 | 1  | 158,301,451 | 0.001046 | -0.266 | -0.229 |  |     |  | <i>CD1B</i>     | TSS200  |
| cg05593336 | 6  | 85,361,633  | 0.003355 | -0.266 | -0.305 |  |     |  |                 |         |
| cg27485289 | 8  | 116,068,124 | 0.000165 | -0.266 | -0.208 |  |     |  |                 |         |
| cg08192033 | 6  | 125,476,407 | 2.14E-07 | -0.266 | -0.240 |  |     |  | <i>TPD52L1</i>  | 5'UTR   |
| cg17322118 | 1  | 85,743,732  | 4.95E-07 | -0.266 | -0.257 |  |     |  | <i>BCL10</i>    | TSS200  |
| cg21129670 | 8  | 50,314,174  | 0.001448 | -0.266 | -0.197 |  |     |  |                 |         |
| cg08699680 | 8  | 32,452,965  | 0.001221 | -0.266 | -0.180 |  |     |  | <i>NRG1</i>     | Body    |
| cg25030515 | 1  | 117,284,802 | 1.92E-05 | -0.266 | -0.196 |  |     |  |                 |         |
| cg09169531 | 1  | 153,030,594 | 0.003047 | -0.266 | -0.227 |  |     |  | <i>SPRR2A</i>   | TSS1500 |
| cg23184756 | 7  | 63,646,960  | 0.001995 | -0.266 | -0.136 |  |     |  |                 |         |
| cg06934394 | 13 | 101,959,848 | 0.013517 | -0.267 | -0.160 |  |     |  | <i>NALCN</i>    | Body    |
| cg09567596 | 8  | 87,684,002  | 0.024705 | -0.267 | -0.232 |  |     |  | <i>CNGB3</i>    | Body    |
| cg15764264 | X  | 151,303,631 | 7.95E-05 | -0.267 | -0.268 |  |     |  | <i>MAGEA10</i>  | Body    |
| cg00297282 | 7  | 50,469,687  | 0.014667 | -0.267 | -0.238 |  |     |  | <i>IKZF1</i>    | 3'UTR   |
| cg05529343 | 3  | 22,412,124  | 8.76E-05 | -0.267 | -0.262 |  |     |  |                 |         |
| cg12852134 | 11 | 88,210,187  | 0.002273 | -0.267 | -0.180 |  |     |  |                 |         |
| cg18023455 | 7  | 49,894,664  | 0.000293 | -0.267 | -0.235 |  |     |  | <i>VWC2</i>     | Body    |
| cg22947481 | 19 | 22,803,398  | 0.003363 | -0.267 | -0.224 |  |     |  |                 |         |
| cg19825898 | 1  | 2,949,651   | 0.038474 | -0.267 | -0.069 |  |     |  |                 |         |
| cg14671357 | Y  | 7,676,811   | 8.79E-07 | -0.267 | -0.278 |  |     |  | <i>TTY12</i>    | Body    |
| cg02014899 | 7  | 7,098,017   | 0.000212 | -0.267 | -0.179 |  |     |  |                 |         |
| cg19520280 | 13 | 111,032,155 | 7.07E-05 | -0.267 | -0.163 |  |     |  | <i>COL4A2</i>   | Body    |
| cg11757167 | 10 | 133,195,947 | 0.006858 | -0.267 | -0.097 |  |     |  |                 |         |
| cg19405868 | 11 | 104,912,363 | 0.015267 | -0.267 | -0.181 |  | Yes |  | <i>CASP1</i>    | Body    |
| cg21606405 | 6  | 152,795,042 | 0.00027  | -0.267 | -0.205 |  |     |  | <i>SYNE1</i>    | Body    |
| cg23339656 | 2  | 234,159,882 | 3.01E-05 | -0.267 | -0.221 |  |     |  | <i>ATG16L1</i>  | TSS1500 |
| cg25714147 | 2  | 137,747,982 | 2.55E-05 | -0.267 | -0.252 |  |     |  | <i>THSD7B</i>   | TSS1500 |
| cg03935729 | 11 | 104,405,198 | 0.006207 | -0.267 | -0.178 |  |     |  |                 |         |
| cg24344394 | 1  | 157,790,434 | 1.13E-06 | -0.267 | -0.236 |  |     |  | <i>FCRL1</i>    | TSS1500 |
| cg05698082 | 6  | 158,239,859 | 1.42E-11 | -0.267 | -0.238 |  |     |  |                 |         |
| cg21984645 | 7  | 214,577     | 3.17E-12 | -0.267 | -0.233 |  |     |  | <i>FAM20C</i>   | Body    |
| cg00215019 | 10 | 50,311,040  | 0.017538 | -0.267 | -0.176 |  |     |  | <i>C10orf72</i> | Body    |
| cg24979513 | 7  | 32,334,483  | 0.017254 | -0.267 | -0.133 |  |     |  |                 |         |

|            |    |             |          |        |        |          |        |  |     |                 |         |
|------------|----|-------------|----------|--------|--------|----------|--------|--|-----|-----------------|---------|
| cg16618605 | X  | 151,128,222 | 8.73E-11 | -0.267 | -0.273 |          |        |  |     | <i>GABRE</i>    | Body    |
| cg17453187 | 8  | 127,384,408 | 1.16E-08 | -0.267 | -0.296 |          |        |  |     |                 |         |
| cg18382294 | 10 | 6,934,352   | 0.014417 | -0.267 | -0.285 |          |        |  |     |                 |         |
| cg20118157 | 3  | 193,078,051 | 0.000293 | -0.267 | -0.199 |          |        |  |     | <i>ATP13A5</i>  | Body    |
| cg27166177 | 22 | 49,498,376  | 8.4E-06  | -0.267 | -0.261 |          |        |  |     |                 |         |
| cg17680303 | 4  | 47,183,921  | 0.002256 | -0.267 | -0.218 |          |        |  |     | <i>GABRB1</i>   | Body    |
| cg23896695 | 8  | 128,931,535 | 4.04E-08 | -0.267 | -0.279 |          |        |  |     | <i>PVT1</i>     | Body    |
| cg03121419 | X  | 125,687,720 | 0.012653 | -0.267 | -0.348 |          |        |  |     | <i>DCAF12L1</i> | TSS1500 |
| cg03453781 | 6  | 132,347,049 | 0.009773 | -0.267 | -0.234 |          |        |  |     |                 |         |
| cg06159667 | X  | 103,268,258 | 0.002254 | -0.267 | -0.216 |          |        |  |     | <i>H2BFWT</i>   | TSS200  |
| cg19680583 | 5  | 83,409,549  | 0.001361 | -0.267 | -0.200 |          |        |  |     | <i>EDIL3</i>    | Body    |
| cg04029027 | 7  | 130,125,811 | 0.002646 | -0.267 | -0.309 |          |        |  |     | <i>MEST</i>     | TSS1500 |
| cg02335370 | 8  | 33,579,138  | 0.028651 | -0.267 | -0.230 |          |        |  |     |                 |         |
| cg06070563 | 10 | 135,190,325 | 0.007573 | -0.267 | -0.141 |          |        |  | Yes |                 |         |
| cg03638781 | 16 | 23,880,664  | 0.008788 | -0.267 | -0.217 |          |        |  |     | <i>PRKCB</i>    | Body    |
| cg15067713 | 3  | 137,433,605 | 0.014108 | -0.267 | -0.236 |          |        |  |     |                 |         |
| cg23791718 | 8  | 60,034,928  | 8.75E-07 | -0.267 | -0.209 |          |        |  |     |                 |         |
| cg09313140 | 12 | 128,309,593 | 0.025813 | -0.267 | -0.343 |          |        |  |     |                 |         |
| cg23310290 | 7  | 676,291     | 4.37E-15 | -0.267 | -0.253 |          |        |  |     | <i>PRKAR1B</i>  | Body    |
| cg03180768 | 15 | 68,923,400  | 0.006566 | -0.267 | -0.126 |          |        |  |     | <i>CORO2B</i>   | Body    |
| cg07089161 | 7  | 153,287,529 | 0.004728 | -0.267 | -0.175 |          |        |  |     |                 |         |
| cg15996914 | 5  | 171,426,937 | 6.05E-16 | -0.267 | -0.253 |          |        |  |     | <i>FBXW11</i>   | Body    |
| cg18658151 | 17 | 77,952,453  | 0.005565 | -0.267 | -0.228 |          |        |  |     | <i>TBC1D16</i>  | Body    |
| cg24000437 | 1  | 152,538,857 | 0.000215 | -0.267 | -0.251 |          |        |  |     | <i>LCE3E</i>    | 5'UTR   |
| cg24709951 | 17 | 73,033,009  | 0.000131 | -0.267 | -0.191 |          |        |  |     |                 |         |
| cg00413543 | 8  | 34,893,470  | 0.000183 | -0.267 | -0.198 |          |        |  |     |                 |         |
| cg24606662 | 1  | 185,882,734 | 8.7E-09  | -0.267 | -0.273 |          |        |  |     | <i>HMCN1</i>    | Body    |
| cg07594472 | 20 | 29,965,177  | 4.79E-08 | -0.267 | -0.250 |          |        |  |     | <i>DEFB119</i>  | Body    |
| cg23629393 | 14 | 47,908,980  | 2.59E-09 | -0.267 | -0.269 |          |        |  |     | <i>MDGA2</i>    | Body    |
| cg02786019 | 7  | 142,582,859 | 5.7E-08  | -0.267 | -0.263 | 1.19E-18 | -0.164 |  |     | <i>TRPV6</i>    | Body    |
| cg14419046 | 9  | 90,043,268  | 1.91E-13 | -0.267 | -0.235 |          |        |  |     |                 |         |
| cg18052778 | 17 | 46,030,312  | 1.68E-11 | -0.267 | -0.238 |          |        |  |     | <i>PRR15L</i>   | Body    |
| cg14982276 | 21 | 42,880,582  | 2.16E-06 | -0.267 | -0.275 |          |        |  |     | <i>TMPRSS2</i>  | TSS1500 |
| cg23499929 | 17 | 79,097,152  | 0.007354 | -0.267 | -0.246 |          |        |  |     | <i>AATK</i>     | Body    |

|            |    |             |          |        |        |  |  |  |                  |         |
|------------|----|-------------|----------|--------|--------|--|--|--|------------------|---------|
| cg08928100 | 5  | 141,477,782 | 1.05E-07 | -0.267 | -0.241 |  |  |  |                  |         |
| cg13557752 | 10 | 125,448,352 | 0.000116 | -0.267 | -0.265 |  |  |  | <i>GPR26</i>     | 3'UTR   |
| cg25028189 | 17 | 2,898,878   | 1.16E-11 | -0.267 | -0.238 |  |  |  | <i>RAP1GAP2</i>  | Body    |
| cg01496891 | 11 | 92,065,861  | 2.49E-07 | -0.268 | -0.276 |  |  |  |                  |         |
| cg10006252 | 17 | 2,976,031   | 3.37E-05 | -0.268 | -0.215 |  |  |  |                  |         |
| cg07939046 | 6  | 31,933,695  | 4.98E-15 | -0.268 | -0.257 |  |  |  | <i>SKIV2L</i>    | Body    |
| cg05641843 | 17 | 7,477,972   | 3.5E-08  | -0.268 | -0.234 |  |  |  | <i>EIF4A1</i>    | Body    |
| cg10369653 | 3  | 38,679,751  | 0.000243 | -0.268 | -0.206 |  |  |  | <i>SCN5A</i>     | 5'UTR   |
| cg20040306 | 12 | 10,163,345  | 0.000216 | -0.268 | -0.234 |  |  |  | <i>CLEC12B</i>   | 5'UTR   |
| cg01284709 | 11 | 104,972,078 | 0.000563 | -0.268 | -0.267 |  |  |  | <i>CARD17</i>    | Body    |
| cg11078326 | 1  | 104,616,118 | 5.26E-05 | -0.268 | -0.256 |  |  |  |                  |         |
| cg26345401 | 8  | 125,538,412 | 1.46E-09 | -0.268 | -0.278 |  |  |  | <i>TATDN1</i>    | Body    |
| cg06968859 | 2  | 80,724,209  | 3.01E-06 | -0.268 | -0.328 |  |  |  | <i>CTNNA2</i>    | Body    |
| cg02352295 | X  | 144,901,807 | 0.001068 | -0.268 | -0.226 |  |  |  | <i>SLITRK2</i>   | TSS1500 |
| cg00482994 | 6  | 32,945,234  | 9.41E-13 | -0.268 | -0.260 |  |  |  | <i>BRD2</i>      | Body    |
| cg07858195 | 5  | 177,853,481 | 0.000102 | -0.268 | -0.261 |  |  |  | <i>COL23A1</i>   | Body    |
| cg24750539 | 11 | 119,791,649 | 4.98E-08 | -0.268 | -0.209 |  |  |  |                  |         |
| cg20245515 | 18 | 75,690,565  | 0.000873 | -0.268 | -0.150 |  |  |  |                  |         |
| cg23418201 | 2  | 9,134,057   | 7.36E-13 | -0.268 | -0.252 |  |  |  | <i>MBOAT2</i>    | Body    |
| cg18817392 | 6  | 133,788,156 | 0.002081 | -0.268 | -0.295 |  |  |  | <i>EYA4</i>      | Body    |
| cg01412220 | 20 | 30,134,188  | 2.3E-06  | -0.268 | -0.264 |  |  |  | <i>HM13</i>      | Body    |
| cg12676534 | 20 | 30,449,856  | 0.042583 | -0.268 | -0.279 |  |  |  | <i>DUSP15</i>    | Body    |
| cg14451771 | 9  | 100,822,040 | 3.64E-08 | -0.268 | -0.240 |  |  |  | <i>NANS</i>      | Body    |
| cg10343367 | 16 | 86,375,065  | 1.23E-08 | -0.268 | -0.222 |  |  |  | <i>LOC732275</i> | Body    |
| cg12798859 | 6  | 30,285,979  | 4.29E-07 | -0.268 | -0.315 |  |  |  | <i>HCG18</i>     | Body    |
| cg22789976 | 1  | 209,801,479 | 1.8E-15  | -0.268 | -0.262 |  |  |  | <i>LAMB3</i>     | Body    |
| cg16274353 | 1  | 193,055,237 | 8.07E-10 | -0.268 | -0.245 |  |  |  | <i>TROVE2</i>    | 3'UTR   |
| cg15221831 | 19 | 42,408,464  | 3.06E-06 | -0.268 | -0.261 |  |  |  | <i>ARHGEF1</i>   | Body    |
| cg20110742 | 7  | 32,339,457  | 0.001415 | -0.268 | -0.196 |  |  |  |                  |         |
| cg10487221 | 20 | 60,119,551  | 7.92E-07 | -0.268 | -0.206 |  |  |  | <i>CDH4</i>      | Body    |
| cg16467015 | 18 | 55,816,677  | 2.16E-06 | -0.268 | -0.231 |  |  |  | <i>NEDD4L</i>    | 5'UTR   |
| cg22951411 | 19 | 57,375,307  | 0.000642 | -0.268 | -0.205 |  |  |  |                  |         |
| cg00079898 | 11 | 5,801,244   | 0.001408 | -0.268 | -0.188 |  |  |  | <i>OR52N5</i>    | TSS1500 |
| cg02969422 | 6  | 138,484,687 | 1.2E-10  | -0.268 | -0.256 |  |  |  | <i>KIAA1244</i>  | Body    |



|            |    |             |          |        |        |            |        |     |                 |         |
|------------|----|-------------|----------|--------|--------|------------|--------|-----|-----------------|---------|
| cg25119415 | 1  | 158,799,935 | 0.002819 | -0.268 | -0.268 |            |        |     | <i>MNDA</i>     | TSS1500 |
| cg11698119 | 12 | 53,344,746  | 1.32E-08 | -0.268 | -0.266 |            |        |     | <i>KRT18</i>    | Body    |
| cg17252489 | 2  | 169,069,249 | 3.63E-10 | -0.268 | -0.255 |            |        |     | <i>STK39</i>    | Body    |
| cg16312101 | 8  | 56,357,912  | 0.000982 | -0.268 | -0.240 |            |        |     | <i>XKR4</i>     | Body    |
| cg16218705 | 4  | 140,941,031 | 5.97E-07 | -0.268 | -0.249 |            |        |     | <i>MAML3</i>    | Body    |
| cg21807034 | 18 | 61,144,150  | 0.000113 | -0.268 | -0.246 |            |        |     | <i>SERPIN5</i>  | 1stExon |
| cg24935208 | 3  | 89,097,455  | 0.000346 | -0.268 | -0.302 |            |        |     |                 |         |
| cg18220380 | 8  | 142,185,447 | 9.05E-05 | -0.268 | -0.227 |            |        |     | <i>DENND3</i>   | Body    |
| cg02814525 | 14 | 105,268,604 | 2.85E-05 | -0.268 | -0.190 |            |        |     | <i>ZBTB42</i>   | Body    |
| cg21536783 | 1  | 59,041,407  | 5.15E-07 | -0.268 | -0.267 |            |        |     | <i>TACSTD2</i>  | 3'UTR   |
| cg01210307 | 3  | 35,799,781  | 0.000879 | -0.268 | -0.258 |            |        |     | <i>ARPP-21</i>  | Body    |
| cg19618438 | 2  | 206,794,410 | 2.95E-06 | -0.268 | -0.163 |            |        |     |                 |         |
| cg22333833 | 19 | 16,145,109  | 0.002049 | -0.268 | -0.226 |            |        |     | <i>FLJ25328</i> | Body    |
| cg23702644 | 8  | 3,254,875   | 0.003145 | -0.268 | -0.182 |            |        |     | <i>CSMD1</i>    | Body    |
| cg02139586 | 16 | 59,792,836  | 1.17E-05 | -0.268 | -0.270 |            |        | Yes |                 |         |
| cg02770843 | 19 | 29,214,454  | 0.004427 | -0.268 | -0.289 |            |        |     |                 |         |
| cg12255501 | 8  | 2,421,548   | 0.004218 | -0.268 | -0.185 |            |        |     |                 |         |
| cg01182154 | 13 | 112,202,929 | 0.000931 | -0.268 | -0.167 |            |        |     |                 |         |
| cg25726425 | 2  | 234,637,574 | 0.004509 | -0.268 | -0.151 |            |        |     | <i>UGT1A10</i>  | Body    |
| cg05392949 | 13 | 77,091,333  | 1.05E-07 | -0.268 | -0.262 |            |        |     |                 |         |
| cg24493367 | 4  | 106,635,507 | 2.29E-10 | -0.268 | -0.249 |            |        |     | <i>GSTCD</i>    | 5'UTR   |
| cg19183833 | 17 | 80,042,014  | 0.007664 | -0.268 | -0.119 |            |        |     | <i>FASN</i>     | Body    |
| cg24094538 | 6  | 50,695,479  | 0.00032  | -0.268 | -0.243 |            |        |     | <i>TFAP2D</i>   | Body    |
| cg19798908 | 14 | 48,430,115  | 0.000405 | -0.268 | -0.211 |            |        |     |                 |         |
| cg16027147 | 3  | 108,475,765 | 0.011592 | -0.268 | -0.131 |            |        |     | <i>RETNLB</i>   | Body    |
| cg02871925 | 3  | 50,395,650  | 1.96E-10 | -0.268 | -0.267 |            |        |     | <i>TMEM115</i>  | 1stExon |
| cg00498816 | 3  | 13,665,022  | 0.004454 | -0.268 | -0.304 |            |        |     | <i>FBLN2</i>    | Body    |
| cg16812174 | 8  | 23,423,862  | 0.000112 | -0.268 | -0.195 |            |        |     | <i>SLC25A37</i> | Body    |
| cg13551505 | 12 | 2,014,983   | 6.55E-05 | -0.269 | -0.155 |            |        |     | <i>CACNA2D4</i> | Body    |
| cg17829936 | 6  | 132,910,681 | 0.000989 | -0.269 | -0.235 | 0.04733289 | -0.050 |     | <i>TAAR5</i>    | 1stExon |
| cg11807280 | 2  | 66,654,644  | 9.44E-17 | -0.269 | -0.266 |            |        |     |                 |         |
| cg19624420 | 14 | 48,541,885  | 0.001992 | -0.269 | -0.162 |            |        | Yes |                 |         |
| cg25225483 | 17 | 3,134,816   | 2.05E-05 | -0.269 | -0.215 |            |        |     |                 |         |
| cg14010829 | 9  | 133,322,940 | 0.001517 | -0.269 | -0.227 |            |        |     | <i>ASS1</i>     | 5'UTR   |

|            |    |             |          |        |        |            |        |     |                 |         |
|------------|----|-------------|----------|--------|--------|------------|--------|-----|-----------------|---------|
| cg13837295 | 10 | 134,826,531 | 0.002501 | -0.269 | -0.133 |            |        |     |                 |         |
| cg01955492 | 6  | 49,110,730  | 1.46E-05 | -0.269 | -0.292 |            |        |     |                 |         |
| cg13521991 | 17 | 51,900,096  | 0.000229 | -0.269 | -0.269 |            |        |     | <i>KIF2B</i>    | TSS200  |
| cg19385365 | 7  | 137,263,558 | 1.27E-08 | -0.269 | -0.265 |            |        |     | <i>DGKI</i>     | Body    |
| cg22846876 | 19 | 38,959,746  | 1.2E-05  | -0.269 | -0.198 |            |        |     | <i>RYR1</i>     | Body    |
| cg19534723 | 19 | 20,147,046  | 2E-05    | -0.269 | -0.180 |            |        |     | <i>ZNF682</i>   | 5'UTR   |
| cg20642712 | 7  | 96,745,340  | 1.91E-11 | -0.269 | -0.254 |            |        |     | <i>ACN9</i>     | TSS1500 |
| cg03110722 | 19 | 51,984,816  | 8.42E-06 | -0.269 | -0.217 |            |        |     | <i>CEACAM18</i> | Body    |
| cg21383592 | 4  | 190,569,145 | 0.008793 | -0.269 | -0.179 |            |        |     |                 |         |
| cg06422351 | 19 | 22,888,276  | 6.76E-06 | -0.269 | -0.260 |            |        |     |                 |         |
| cg02211983 | 1  | 152,086,879 | 9.43E-06 | -0.269 | -0.274 |            |        |     | <i>TCHH</i>     | TSS1500 |
| cg10943629 | 5  | 3,286,208   | 0.008501 | -0.269 | -0.164 |            |        |     |                 |         |
| cg23216015 | 7  | 31,726,654  | 0.019107 | -0.269 | -0.182 | 0.00000159 | -0.168 |     | <i>C7orf16</i>  | TSS200  |
| cg03290560 | 3  | 117,774,686 | 0.000396 | -0.269 | -0.260 |            |        |     |                 |         |
| cg04543516 | 20 | 21,589,093  | 3.97E-06 | -0.269 | -0.252 |            |        |     |                 |         |
| cg22338798 | 8  | 130,254,545 | 0.002073 | -0.269 | -0.263 |            |        |     |                 |         |
| cg10210690 | 1  | 55,138,059  | 2.5E-08  | -0.269 | -0.221 |            |        |     | <i>C1orf175</i> | Body    |
| cg07324496 | 7  | 154,241,813 | 0.000516 | -0.269 | -0.223 |            |        |     | <i>DPP6</i>     | Body    |
| cg03795378 | 14 | 20,978,481  | 0.000105 | -0.269 | -0.236 |            |        |     | <i>RNASE10</i>  | TSS200  |
| cg00254095 | 18 | 47,016,218  | 0.000817 | -0.269 | -0.179 |            |        | Yes | <i>RPL17</i>    | Body    |
| cg09102610 | 4  | 94,427,508  | 0.008967 | -0.269 | -0.165 |            |        |     | <i>GRID2</i>    | Body    |
| cg11900742 | 8  | 114,058,427 | 0.011686 | -0.269 | -0.315 |            |        |     | <i>CSMD3</i>    | Body    |
| cg12728791 | 1  | 185,925,146 | 0.014763 | -0.269 | -0.115 |            |        |     | <i>HMCN1</i>    | Body    |
| cg00206332 | X  | 151,140,984 | 3.32E-08 | -0.269 | -0.266 |            |        |     | <i>GABRE</i>    | Body    |
| cg02230254 | 11 | 65,586,170  | 1.01E-10 | -0.269 | -0.261 |            |        |     |                 |         |
| cg04638205 | 5  | 3,002,493   | 0.011717 | -0.269 | -0.094 |            |        |     |                 |         |
| cg25219874 | 17 | 22,193,751  | 0.002095 | -0.269 | -0.244 |            |        |     |                 |         |
| cg22785561 | 4  | 46,923,365  | 5.65E-08 | -0.269 | -0.255 |            |        |     | <i>GABRA4</i>   | 3'UTR   |
| cg02389084 | 7  | 26,403,254  | 8.52E-07 | -0.269 | -0.270 |            |        |     | <i>SNX10</i>    | Body    |
| cg07454595 | 4  | 23,561,262  | 0.000115 | -0.269 | -0.193 |            |        |     |                 |         |
| cg23812886 | X  | 48,056,290  | 0.000327 | -0.269 | -0.230 | 1.24E-08   | -0.160 |     | <i>SSX5</i>     | TSS200  |
| cg26623222 | X  | 144,712,731 | 0.015503 | -0.269 | -0.183 |            |        |     |                 |         |
| cg15003570 | 10 | 133,529,939 | 0.007355 | -0.269 | -0.269 |            |        |     |                 |         |
| cg27110580 | 3  | 195,463,368 | 2.34E-05 | -0.269 | -0.223 |            |        |     | <i>MUC20</i>    | 3'UTR   |

|            |    |             |          |        |        |          |        |     |                  |         |
|------------|----|-------------|----------|--------|--------|----------|--------|-----|------------------|---------|
| cg14747086 | 6  | 30,070,087  | 3.03E-05 | -0.269 | -0.268 |          |        |     |                  |         |
| cg20596724 | 12 | 57,328,644  | 3.3E-08  | -0.269 | -0.265 |          |        |     | <i>SDR9C7</i>    | TSS1500 |
| cg05452854 | 16 | 32,276,952  | 6.28E-06 | -0.269 | -0.247 |          |        |     |                  |         |
| cg12108912 | 2  | 120,435,949 | 7.73E-06 | -0.269 | -0.349 | 3.23E-19 | -0.197 |     | <i>TMEM177</i>   | TSS1500 |
| cg14198860 | 19 | 3,982,566   | 0.000129 | -0.269 | -0.221 |          |        |     | <i>EEF2</i>      | Body    |
| cg11452087 | 1  | 2,918,752   | 0.000161 | -0.269 | -0.205 |          |        |     |                  |         |
| cg07996278 | 4  | 190,529,481 | 3.19E-09 | -0.269 | -0.246 |          |        |     |                  |         |
| cg08698943 | 10 | 3,509,758   | 2.91E-18 | -0.269 | -0.288 |          |        |     |                  |         |
| cg05893353 | 3  | 115,335,126 | 0.002305 | -0.269 | -0.332 |          |        |     |                  |         |
| cg24445116 | 10 | 48,523,589  | 1.63E-05 | -0.269 | -0.192 |          |        |     |                  |         |
| cg06120122 | 11 | 22,201,921  | 0.001125 | -0.269 | -0.208 |          |        |     |                  |         |
| cg01525428 | 8  | 56,436,771  | 0.005567 | -0.269 | -0.224 |          |        |     | <i>XKR4</i>      | Body    |
| cg20966659 | 3  | 126,379,474 | 2.11E-07 | -0.269 | -0.258 |          |        |     |                  |         |
| cg11683364 | 1  | 202,205,348 | 5.54E-07 | -0.269 | -0.200 |          |        |     | <i>LGR6</i>      | Body    |
| cg09356916 | 4  | 23,791,473  | 0.003185 | -0.269 | -0.179 |          |        |     |                  |         |
| cg09131332 | 22 | 50,482,045  | 1.5E-09  | -0.269 | -0.273 |          |        |     | <i>TLL8</i>      | Body    |
| cg16273485 | 3  | 192,963,092 | 0.002725 | -0.269 | -0.192 |          |        |     | <i>HRASLS</i>    | 5'UTR   |
| cg19495428 | 10 | 135,123,067 | 2.8E-10  | -0.269 | -0.261 |          |        |     | <i>ZNF511</i>    | Body    |
| cg09104321 | 12 | 34,755,856  | 5.2E-05  | -0.269 | -0.224 |          |        |     |                  |         |
| cg15713734 | 4  | 137,718,563 | 0.007972 | -0.269 | -0.138 |          |        |     |                  |         |
| cg04046889 | 8  | 56,232,667  | 0.000127 | -0.269 | -0.257 |          |        |     | <i>XKR4</i>      | Body    |
| cg09646578 | 8  | 5,019,363   | 0.042937 | -0.269 | -0.102 |          |        |     |                  |         |
| cg10541534 | 4  | 140,429,995 | 5.35E-06 | -0.269 | -0.243 |          |        |     | <i>SETD7</i>     | 3'UTR   |
| cg05132999 | 1  | 51,796,987  | 0.000371 | -0.270 | -0.206 |          |        |     | <i>TTC39A</i>    | Body    |
| cg25549519 | X  | 151,306,094 | 4.97E-05 | -0.270 | -0.260 |          |        |     | <i>MAGEA10</i>   | 5'UTR   |
| cg09786278 | 1  | 241,198,066 | 2.58E-07 | -0.270 | -0.220 |          |        | Yes | <i>RGS7</i>      | Body    |
| cg04582365 | 10 | 59,155,846  | 0.000679 | -0.270 | -0.288 |          |        |     |                  |         |
| cg08704934 | 3  | 194,826,585 | 0.002656 | -0.270 | -0.354 |          |        |     | <i>C3orf21</i>   | Body    |
| cg08584061 | 19 | 22,718,926  | 1.41E-06 | -0.270 | -0.274 |          |        |     |                  |         |
| cg10233904 | 20 | 61,625,364  | 0.000649 | -0.270 | -0.213 |          |        |     |                  |         |
| cg17826043 | 19 | 42,299,635  | 6.69E-08 | -0.270 | -0.200 |          |        |     | <i>CEACAM3</i>   | TSS1500 |
| cg22872906 | 4  | 124,694,137 | 1.4E-07  | -0.270 | -0.281 |          |        |     | <i>LOC285419</i> | Body    |
| cg16226642 | 11 | 7,847,876   | 3.43E-10 | -0.270 | -0.267 |          |        |     | <i>OR5P3</i>     | TSS1500 |
| cg15640140 | 19 | 17,972,376  | 4.22E-09 | -0.270 | -0.247 |          |        |     | <i>RPL18AP3</i>  | Body    |

|            |    |             |          |        |        |         |        |  |                  |         |
|------------|----|-------------|----------|--------|--------|---------|--------|--|------------------|---------|
| cg11195360 | 11 | 124,311,399 | 0.031156 | -0.270 | -0.226 |         |        |  | <i>OR8B8</i>     | TSS1500 |
| cg00264754 | 11 | 40,136,810  | 0.003878 | -0.270 | -0.236 |         |        |  | <i>LRRC4C</i>    | Body    |
| cg16291750 | 3  | 18,003,561  | 1E-04    | -0.270 | -0.254 |         |        |  |                  |         |
| cg08874384 | 19 | 17,725,883  | 9.62E-08 | -0.270 | -0.228 |         |        |  | <i>UNC13A</i>    | Body    |
| cg22718077 | 7  | 57,712,819  | 0.003187 | -0.270 | -0.213 |         |        |  |                  |         |
| cg00227110 | 11 | 124,056,297 | 1.77E-06 | -0.270 | -0.227 |         |        |  |                  |         |
| cg19307090 | 11 | 66,206,913  | 0.000839 | -0.270 | -0.145 |         |        |  | <i>MRPL11</i>    | TSS1500 |
| cg24377150 | 1  | 2,179,933   | 4.89E-07 | -0.270 | -0.273 |         |        |  | <i>SKI</i>       | Body    |
| cg12050706 | 1  | 148,891,668 | 1.46E-06 | -0.270 | -0.234 |         |        |  |                  |         |
| cg09085201 | 7  | 49,708,532  | 1.1E-07  | -0.270 | -0.301 |         |        |  |                  |         |
| cg00859622 | 20 | 36,532,668  | 0.001183 | -0.270 | -0.295 |         |        |  | <i>VSTM2L</i>    | Body    |
| cg20435284 | 19 | 1,166,292   | 0.030736 | -0.270 | -0.248 |         |        |  | <i>SBNO2</i>     | 5'UTR   |
| cg05750788 | 11 | 67,210,225  | 2.8E-16  | -0.270 | -0.271 |         |        |  | <i>CORO1B</i>    | 5'UTR   |
| cg05033952 | 16 | 34,255,535  | 0.000232 | -0.270 | -0.235 |         |        |  |                  |         |
| cg22295983 | 7  | 46,015,793  | 0.030513 | -0.270 | -0.056 |         |        |  |                  |         |
| cg19964403 | 2  | 235,961,524 | 3.87E-06 | -0.270 | -0.216 |         |        |  | <i>SH3BP4</i>    | Body    |
| cg07297111 | 2  | 242,128,843 | 0.001498 | -0.270 | -0.179 |         |        |  | <i>ANO7</i>      | Body    |
| cg26505300 | 21 | 37,579,025  | 1.01E-09 | -0.270 | -0.271 |         |        |  | <i>DOPEY2</i>    | Body    |
| cg17538768 | 11 | 123,626,540 | 0.003827 | -0.270 | -0.218 |         |        |  | <i>OR6X1</i>     | TSS1500 |
| cg11295724 | 20 | 1,538,353   | 0.000535 | -0.270 | -0.246 |         |        |  | <i>SIRPD</i>     | TSS200  |
| cg24726333 | 14 | 106,173,575 | 1.67E-05 | -0.270 | -0.170 |         |        |  |                  |         |
| cg23571170 | 11 | 124,180,298 | 0.002262 | -0.270 | -0.195 |         |        |  | <i>OR8D1</i>     | 1stExon |
| cg26341619 | 1  | 29,676,588  | 0.004553 | -0.270 | -0.188 |         |        |  |                  |         |
| cg11696165 | 12 | 120,663,824 | 1.12E-06 | -0.270 | -0.273 |         |        |  | <i>PXN</i>       | 5'UTR   |
| cg18814052 | 5  | 122,736,095 | 3.26E-07 | -0.270 | -0.269 |         |        |  | <i>CEP120</i>    | Body    |
| cg17440085 | 11 | 124,056,244 | 0.029985 | -0.270 | -0.151 |         |        |  |                  |         |
| cg16941568 | 11 | 1,575,781   | 3E-09    | -0.270 | -0.277 |         |        |  | <i>HCCA2</i>     | Body    |
| cg02572796 | 4  | 186,732,124 | 1.13E-11 | -0.270 | -0.257 |         |        |  | <i>SORBS2</i>    | 5'UTR   |
| cg09176893 | 4  | 100,574,596 | 0.028799 | -0.270 | -0.224 |         |        |  |                  |         |
| cg16154857 | 3  | 69,249,276  | 1.05E-17 | -0.270 | -0.257 |         |        |  | <i>FRMD4B</i>    | Body    |
| cg01195196 | 16 | 2,770,211   | 0.0115   | -0.270 | -0.285 |         |        |  | <i>PRSS27</i>    | 1stExon |
| cg22897419 | 3  | 147,449,682 | 0.006196 | -0.270 | -0.257 |         |        |  |                  |         |
| cg25994725 | 6  | 35,703,435  | 2.91E-07 | -0.270 | -0.171 | 2.9E-12 | -0.130 |  | <i>LOC285847</i> | Body    |
| cg02202484 | 1  | 152,942,688 | 0.028701 | -0.270 | -0.192 |         |        |  | <i>SPRR4</i>     | TSS1500 |

|            |    |             |          |        |        |          |        |  |                |         |
|------------|----|-------------|----------|--------|--------|----------|--------|--|----------------|---------|
| cg13587665 | 3  | 128,154,244 | 2.4E-08  | -0.271 | -0.287 |          |        |  |                |         |
| cg01452911 | 16 | 86,512,095  | 1.09E-05 | -0.271 | -0.216 |          |        |  |                |         |
| cg24910822 | 10 | 63,553,327  | 7.79E-05 | -0.271 | -0.230 |          |        |  |                |         |
| cg25567280 | 3  | 149,654,539 | 6.51E-10 | -0.271 | -0.267 |          |        |  | <i>RNF13</i>   | Body    |
| cg23207673 | 1  | 35,649,498  | 1.48E-12 | -0.271 | -0.250 |          |        |  | <i>SFPQ</i>    | 3'UTR   |
| cg26496205 | 16 | 1,488,037   | 0.001728 | -0.271 | -0.245 |          |        |  | <i>CCDC154</i> | Body    |
| cg04459983 | 5  | 5,079,075   | 0.00327  | -0.271 | -0.136 |          |        |  |                |         |
| cg13041637 | 11 | 123,626,485 | 1.51E-09 | -0.271 | -0.266 |          |        |  | <i>OR6X1</i>   | TSS1500 |
| cg20120939 | 11 | 105,010,531 | 0.024529 | -0.271 | -0.237 |          |        |  | <i>CARD18</i>  | TSS200  |
| cg26127113 | 15 | 57,799,854  | 2.86E-09 | -0.271 | -0.279 |          |        |  | <i>CGNL1</i>   | Body    |
| cg03717503 | 16 | 86,734,176  | 5.76E-05 | -0.271 | -0.213 |          |        |  |                |         |
| cg06970571 | 1  | 153,232,060 | 0.012028 | -0.271 | -0.189 |          |        |  | <i>LOR</i>     | TSS200  |
| cg10413513 | 16 | 7,106,265   | 0.00195  | -0.271 | -0.226 |          |        |  | <i>A2BP1</i>   | Body    |
| cg17919396 | 15 | 101,440,419 | 3.57E-07 | -0.271 | -0.239 |          |        |  | <i>ALDH1A3</i> | Body    |
| cg23957285 | 19 | 4,558,740   | 0.007186 | -0.271 | -0.302 |          |        |  | <i>SEMA6B</i>  | TSS1500 |
| cg21194776 | 10 | 75,314,128  | 4.46E-06 | -0.271 | -0.222 | 7.33E-10 | -0.109 |  | <i>USP54</i>   | Body    |
| cg15057138 | 1  | 2,849,495   | 0.00159  | -0.271 | -0.145 |          |        |  |                |         |
| cg03832015 | 16 | 5,982,275   | 0.000178 | -0.271 | -0.244 |          |        |  |                |         |
| cg05116719 | 11 | 8,007,597   | 8.65E-05 | -0.271 | -0.189 |          |        |  | <i>EIF3F</i>   | TSS1500 |
| cg24022152 | 11 | 12,133,196  | 4.89E-06 | -0.271 | -0.274 |          |        |  | <i>MICAL2</i>  | 5'UTR   |
| cg20729460 | 4  | 62,076,499  | 5.92E-06 | -0.271 | -0.252 |          |        |  |                |         |
| cg22234479 | 13 | 19,756,050  | 0.048847 | -0.271 | -0.104 |          |        |  | <i>TUBA3C</i>  | TSS200  |
| cg18142856 | 11 | 7,961,111   | 0.003363 | -0.271 | -0.210 |          |        |  | <i>OR10A3</i>  | TSS200  |
| cg18305031 | 19 | 3,982,603   | 0.001997 | -0.271 | -0.214 |          |        |  | <i>SNORD37</i> | TSS200  |
| cg11983942 | 11 | 132,946,934 | 4.23E-06 | -0.271 | -0.251 |          |        |  | <i>OPCML</i>   | Body    |
| cg13726563 | 13 | 112,599,593 | 0.005821 | -0.271 | -0.137 |          |        |  |                |         |
| cg14422932 | 4  | 5,374,425   | 0.004168 | -0.271 | -0.275 |          |        |  | <i>STK32B</i>  | Body    |
| cg15096958 | 19 | 58,334,700  | 5.34E-12 | -0.271 | -0.255 |          |        |  |                |         |
| cg23816037 | 2  | 127,455,623 | 0.003248 | -0.271 | -0.218 |          |        |  |                |         |
| cg06282802 | 2  | 127,529,446 | 9.35E-06 | -0.271 | -0.237 |          |        |  |                |         |
| cg14060417 | 12 | 112,746,621 | 1.34E-06 | -0.271 | -0.271 |          |        |  |                |         |
| cg19026859 | 12 | 112,818,601 | 1.66E-12 | -0.271 | -0.270 |          |        |  |                |         |
| cg16764236 | 17 | 32,611,290  | 0.000305 | -0.271 | -0.206 |          |        |  | <i>CCL11</i>   | TSS1500 |
| cg00728046 | 19 | 43,569,592  | 2.67E-05 | -0.271 | -0.296 |          |        |  | <i>PSG2</i>    | 3'UTR   |

|            |    |             |          |        |        |  |  |           |         |
|------------|----|-------------|----------|--------|--------|--|--|-----------|---------|
| cg14457305 | 9  | 138,482,392 | 0.000607 | -0.271 | -0.157 |  |  |           |         |
| cg00301762 | 7  | 1,714,056   | 0.000751 | -0.271 | -0.182 |  |  |           |         |
| cg07804196 | X  | 33,229,454  | 1.08E-05 | -0.271 | -0.241 |  |  | DMD       | 5'UTR   |
| cg02824604 | 12 | 42,124,611  | 1.28E-09 | -0.271 | -0.260 |  |  |           |         |
| cg13573346 | 14 | 101,363,925 | 1.94E-09 | -0.271 | -0.273 |  |  | MEG8      | Body    |
| cg18813601 | 10 | 3,330,571   | 0.010205 | -0.271 | -0.267 |  |  |           |         |
| cg22225849 | 6  | 11,188,760  | 0.00124  | -0.271 | -0.237 |  |  | NEDD9     | Body    |
| cg13451433 | 9  | 139,317,772 | 0.005632 | -0.271 | -0.238 |  |  | PMPCA     | 3'UTR   |
| cg07998554 | 19 | 14,785,776  | 1.91E-05 | -0.271 | -0.209 |  |  | EMR3      | TSS200  |
| cg12314682 | 17 | 77,952,463  | 0.00446  | -0.271 | -0.245 |  |  | TBC1D16   | Body    |
| cg13289364 | 11 | 48,510,647  | 0.00384  | -0.271 | -0.185 |  |  | OR4A47    | 1stExon |
| cg19460909 | 13 | 112,515,103 | 0.015688 | -0.271 | -0.152 |  |  |           |         |
| cg20736321 | 11 | 1,029,162   | 0.000154 | -0.271 | -0.156 |  |  | MUC6      | Body    |
| cg21592091 | 3  | 160,427,542 | 6.65E-09 | -0.271 | -0.249 |  |  |           |         |
| cg11553311 | 5  | 66,541,588  | 1.49E-10 | -0.271 | -0.251 |  |  |           |         |
| cg19153095 | 8  | 106,811,143 | 0.001299 | -0.271 | -0.261 |  |  | ZFPM2     | Body    |
| cg23029597 | 12 | 123,009,494 | 7.83E-06 | -0.271 | -0.229 |  |  | RSRC2     | 5'UTR   |
| cg23076870 | 10 | 135,174,003 | 3.07E-05 | -0.271 | -0.261 |  |  |           |         |
| cg04554195 | 19 | 52,268,814  | 1.72E-08 | -0.271 | -0.242 |  |  | FPR2      | 5'UTR   |
| cg16800162 | 11 | 90,739,454  | 0.001683 | -0.271 | -0.246 |  |  |           |         |
| cg04726373 | 16 | 67,513,468  | 2.13E-06 | -0.271 | -0.228 |  |  | ATP6VOD1  | Body    |
| cg07103673 | 11 | 7,092,719   | 0.000818 | -0.271 | -0.296 |  |  | NLRP14    | 3'UTR   |
| cg14592066 | 18 | 2,851,949   | 1.04E-10 | -0.271 | -0.259 |  |  | EMILIN2   | Body    |
| cg16555188 | 5  | 9,838,964   | 0.000312 | -0.271 | -0.275 |  |  | LOC285692 | Body    |
| cg21899374 | 8  | 144,915,517 | 1.55E-05 | -0.271 | -0.237 |  |  |           |         |
| cg07699978 | 12 | 63,194,001  | 2.78E-09 | -0.271 | -0.259 |  |  | PPM1H     | Body    |
| cg19704073 | 1  | 3,162,159   | 1.36E-07 | -0.271 | -0.222 |  |  | PRDM16    | Body    |
| cg27237541 | 10 | 26,497,739  | 3.39E-05 | -0.271 | -0.291 |  |  | MYO3A     | Body    |
| cg00367962 | 2  | 240,508,665 | 0.036407 | -0.271 | -0.329 |  |  |           |         |
| cg13676706 | 12 | 127,944,448 | 0.009593 | -0.272 | -0.214 |  |  |           |         |
| cg17840047 | 4  | 18,580,125  | 4.54E-12 | -0.272 | -0.246 |  |  |           |         |
| cg09579081 | 15 | 81,109,237  | 6.03E-06 | -0.272 | -0.272 |  |  | KIAA1199  | 5'UTR   |
| cg13805219 | Y  | 6,137,453   | 0.000593 | -0.272 | -0.273 |  |  |           |         |
| cg17824277 | 1  | 13,838,127  | 0.003405 | -0.272 | -0.117 |  |  |           |         |

|            |    |             |          |        |        |  |  |  |                  |         |
|------------|----|-------------|----------|--------|--------|--|--|--|------------------|---------|
| cg26079428 | 11 | 106,513,618 | 1.11E-05 | -0.272 | -0.270 |  |  |  |                  |         |
| cg19981951 | 18 | 61,817,088  | 0.000456 | -0.272 | -0.220 |  |  |  | <i>C18orf20</i>  | TSS1500 |
| cg05138702 | 10 | 126,827,000 | 0.0001   | -0.272 | -0.213 |  |  |  | <i>CTBP2</i>     | 5'UTR   |
| cg15486123 | 1  | 152,881,815 | 0.023202 | -0.272 | -0.191 |  |  |  | <i>IVL</i>       | 5'UTR   |
| cg12466324 | 6  | 154,406,664 | 0.000387 | -0.272 | -0.259 |  |  |  | <i>OPRM1</i>     | Body    |
| cg02939781 | 3  | 183,208,857 | 0.000132 | -0.272 | -0.224 |  |  |  | <i>KLHL6</i>     | 3'UTR   |
| cg18224977 | 1  | 5,398,602   | 0.001567 | -0.272 | -0.238 |  |  |  |                  |         |
| cg03967337 | 1  | 185,941,827 | 6.88E-05 | -0.272 | -0.249 |  |  |  | <i>HMCN1</i>     | Body    |
| cg14527029 | 3  | 120,401,095 | 2.31E-10 | -0.272 | -0.267 |  |  |  | <i>HGD</i>       | 1stExon |
| cg15103616 | 12 | 34,546,903  | 1.47E-05 | -0.272 | -0.264 |  |  |  |                  |         |
| cg24820809 | 22 | 36,019,252  | 5.02E-06 | -0.272 | -0.269 |  |  |  | <i>MB</i>        | 1stExon |
| cg00995854 | 1  | 157,802,305 | 0.000742 | -0.272 | -0.260 |  |  |  | <i>CD5L</i>      | Body    |
| cg07950469 | 16 | 71,265,941  | 1.13E-05 | -0.272 | -0.249 |  |  |  | <i>HYDIN</i>     | TSS1500 |
| cg03174933 | 4  | 155,720,155 | 0.002784 | -0.272 | -0.192 |  |  |  | <i>RBM46</i>     | Body    |
| cg24384519 | 7  | 31,125,198  | 0.003885 | -0.272 | -0.172 |  |  |  | <i>ADCYAP1R1</i> | Body    |
| cg04194840 | 16 | 58,545,502  | 0.00401  | -0.272 | -0.193 |  |  |  | <i>NDRG4</i>     | 3'UTR   |
| cg07106766 | 3  | 137,014,230 | 0.033238 | -0.272 | -0.368 |  |  |  |                  |         |
| cg06553058 | 12 | 117,036,929 | 1.52E-15 | -0.272 | -0.243 |  |  |  |                  |         |
| cg18037376 | 10 | 134,004,552 | 4.39E-10 | -0.272 | -0.286 |  |  |  | <i>DPYSL4</i>    | Body    |
| cg02600772 | X  | 80,259,473  | 0.028808 | -0.272 | -0.136 |  |  |  |                  |         |
| cg13590228 | 3  | 150,477,925 | 9.57E-10 | -0.272 | -0.261 |  |  |  | <i>SIAH2</i>     | Body    |
| cg21948655 | 1  | 152,849,738 | 0.002236 | -0.272 | -0.214 |  |  |  | <i>SMCP</i>      | TSS1500 |
| cg02894109 | 4  | 16,359,846  | 0.000167 | -0.272 | -0.268 |  |  |  |                  |         |
| cg17150265 | 1  | 242,683,142 | 0.012206 | -0.272 | -0.264 |  |  |  | <i>PLD5</i>      | 5'UTR   |
| cg07322909 | 11 | 55,541,018  | 0.000186 | -0.272 | -0.269 |  |  |  | <i>OR5D13</i>    | 1stExon |
| cg19930575 | X  | 151,122,266 | 2.95E-09 | -0.272 | -0.260 |  |  |  | <i>GABRE</i>     | 3'UTR   |
| cg24431372 | 3  | 112,494,836 | 6.75E-07 | -0.272 | -0.284 |  |  |  |                  |         |
| cg07972716 | 20 | 54,582,710  | 0.000157 | -0.272 | -0.255 |  |  |  |                  |         |
| cg00104608 | 3  | 76,146,501  | 0.003395 | -0.272 | -0.235 |  |  |  |                  |         |
| cg14945086 | 18 | 2,657,780   | 6.14E-13 | -0.272 | -0.268 |  |  |  | <i>SMCHD1</i>    | Body    |
| cg06651530 | 12 | 116,599,557 | 0.000303 | -0.272 | -0.246 |  |  |  | <i>MED13L</i>    | Body    |
| cg19666687 | 14 | 98,154,028  | 0.000381 | -0.272 | -0.264 |  |  |  |                  |         |
| cg15013801 | 10 | 73,976,790  | 3.37E-06 | -0.272 | -0.240 |  |  |  | <i>ASCC1</i>     | TSS1500 |
| cg25916135 | 2  | 59,071,761  | 0.000168 | -0.272 | -0.229 |  |  |  |                  |         |

|            |    |             |          |        |        |  |  |  |                  |         |
|------------|----|-------------|----------|--------|--------|--|--|--|------------------|---------|
| cg13661446 | X  | 151,093,031 | 0.000571 | -0.272 | -0.229 |  |  |  | <i>MAGEA4</i>    | Body    |
| cg27029018 | 8  | 2,832,048   | 0.002074 | -0.272 | -0.209 |  |  |  | <i>CSMD1</i>     | Body    |
| cg04422802 | 19 | 22,446,026  | 6.62E-05 | -0.272 | -0.219 |  |  |  |                  |         |
| cg24873202 | 7  | 48,045,851  | 0.000319 | -0.272 | -0.247 |  |  |  | <i>SUNC1</i>     | Body    |
| cg11936639 | 6  | 32,944,495  | 8.67E-08 | -0.272 | -0.318 |  |  |  | <i>BRD2</i>      | Body    |
| cg23554286 | 2  | 137,951,070 | 0.001013 | -0.272 | -0.235 |  |  |  | <i>THSD7B</i>    | Body    |
| cg07146073 | 17 | 29,852,668  | 0.000217 | -0.272 | -0.129 |  |  |  | <i>RAB11FIP4</i> | Body    |
| cg27314580 | 11 | 56,086,656  | 0.000153 | -0.272 | -0.235 |  |  |  | <i>OR8K3</i>     | 1stExon |
| cg21253087 | 9  | 139,290,292 | 0.005215 | -0.272 | -0.242 |  |  |  | <i>SNAPC4</i>    | Body    |
| cg00756172 | 5  | 5,033,311   | 0.030912 | -0.272 | -0.125 |  |  |  | <i>LOC340094</i> | TSS1500 |
| cg02138218 | 1  | 175,035,502 | 0.002833 | -0.272 | -0.228 |  |  |  | <i>TNN</i>       | TSS1500 |
| cg22651079 | 8  | 91,796,396  | 3.45E-08 | -0.272 | -0.286 |  |  |  |                  |         |
| cg25406923 | 2  | 74,010,396  | 9.07E-05 | -0.272 | -0.239 |  |  |  | <i>C2orf78</i>   | TSS1500 |
| cg01973181 | 12 | 124,436,804 | 1.6E-07  | -0.272 | -0.253 |  |  |  | <i>CCDC92</i>    | 5'UTR   |
| cg12435134 | 4  | 76,860,890  | 4.55E-11 | -0.272 | -0.233 |  |  |  | <i>NAAA</i>      | Body    |
| cg22040874 | 1  | 4,230,824   | 0.011522 | -0.272 | -0.128 |  |  |  |                  |         |
| cg24297835 | 8  | 133,732,174 | 0.013801 | -0.272 | -0.273 |  |  |  | <i>TMEM71</i>    | Body    |
| cg11825436 | 1  | 157,961,169 | 0.014911 | -0.272 | -0.173 |  |  |  |                  |         |
| cg25019567 | 1  | 209,346,611 | 3.5E-06  | -0.272 | -0.295 |  |  |  |                  |         |
| cg19770715 | 6  | 31,848,028  | 7.97E-09 | -0.273 | -0.267 |  |  |  | <i>EHMT2</i>     | Body    |
| cg20003179 | 1  | 159,175,295 | 8.75E-05 | -0.273 | -0.220 |  |  |  | <i>DARC</i>      | Body    |
| cg03642695 | 17 | 15,211,958  | 0.005956 | -0.273 | -0.207 |  |  |  | <i>TEKT3</i>     | Body    |
| cg16202419 | 5  | 44,483,200  | 0.013988 | -0.273 | -0.171 |  |  |  |                  |         |
| cg21921978 | 11 | 109,002,818 | 0.000994 | -0.273 | -0.227 |  |  |  |                  |         |
| cg04137837 | 14 | 97,647,221  | 4.39E-05 | -0.273 | -0.278 |  |  |  |                  |         |
| cg04144911 | 19 | 51,979,244  | 5.36E-07 | -0.273 | -0.218 |  |  |  | <i>CEACAM18</i>  | TSS1500 |
| cg07018389 | 5  | 172,195,678 | 1.73E-24 | -0.273 | -0.258 |  |  |  | <i>DUSP1</i>     | 3'UTR   |
| cg04924555 | 6  | 157,505,996 | 8.62E-06 | -0.273 | -0.256 |  |  |  | <i>ARID1B</i>    | Body    |
| cg17089486 | 12 | 60,083,246  | 0.004036 | -0.273 | -0.175 |  |  |  | <i>SLC16A7</i>   | 5'UTR   |
| cg27179498 | 22 | 21,062,267  | 1.99E-05 | -0.273 | -0.202 |  |  |  | <i>PI4KA</i>     | 3'UTR   |
| cg26334558 | 12 | 51,794,933  | 7.77E-09 | -0.273 | -0.257 |  |  |  |                  |         |
| cg07478795 | 3  | 23,782,847  | 0.021458 | -0.273 | -0.224 |  |  |  |                  |         |
| cg20531808 | 8  | 89,231,006  | 3.61E-08 | -0.273 | -0.269 |  |  |  | <i>MMP16</i>     | Body    |
| cg04125586 | 1  | 201,982,404 | 0.002424 | -0.273 | -0.339 |  |  |  | <i>ELF3</i>      | Body    |



|            |    |             |          |        |        |           |        |     |  |                  |         |
|------------|----|-------------|----------|--------|--------|-----------|--------|-----|--|------------------|---------|
| cg16384957 | 11 | 1,050,848   | 0.024259 | -0.273 | -0.147 |           |        |     |  |                  |         |
| cg22377166 | 1  | 166,765,935 | 0.042437 | -0.273 | -0.146 |           |        |     |  |                  |         |
| cg23693245 | 17 | 78,997,300  | 3.51E-12 | -0.273 | -0.262 |           |        |     |  |                  |         |
| cg00670915 | 2  | 101,620,543 | 5.08E-13 | -0.273 | -0.254 |           |        |     |  | <i>RPL31</i>     | Body    |
| cg07633435 | 5  | 152,869,009 | 1.91E-07 | -0.273 | -0.290 |           |        |     |  | <i>GRIA1</i>     | TSS1500 |
| cg12735489 | 15 | 37,783,172  | 0.00034  | -0.273 | -0.276 |           |        |     |  |                  |         |
| cg19854704 | 10 | 133,508,755 | 0.008416 | -0.273 | -0.165 |           |        |     |  |                  |         |
| cg20888292 | 8  | 133,490,080 | 0.012944 | -0.273 | -0.268 |           |        | Yes |  | <i>KCNQ3</i>     | Body    |
| cg22669120 | 12 | 5,024,586   | 0.000957 | -0.273 | -0.203 |           |        |     |  | <i>KCNA1</i>     | 3'UTR   |
| cg11042769 | 8  | 2,242,128   | 0.027503 | -0.273 | -0.154 |           |        |     |  |                  |         |
| cg02110858 | 8  | 145,028,222 | 4.82E-38 | -0.273 | -0.260 |           |        |     |  | <i>PLEC1</i>     | Body    |
| cg23846955 | 15 | 22,541,062  | 1.6E-09  | -0.273 | -0.276 |           |        |     |  |                  |         |
| cg13353019 | 5  | 1,648,083   | 0.000323 | -0.273 | -0.139 |           |        |     |  |                  |         |
| cg19537070 | 5  | 161,112,334 | 2.73E-05 | -0.273 | -0.281 |           |        |     |  | <i>GABRA6</i>    | TSS1500 |
| cg19378216 | 20 | 31,870,775  | 7.38E-08 | -0.273 | -0.267 |           |        |     |  | <i>C20orf114</i> | TSS200  |
| cg12333338 | 6  | 32,787,925  | 5.22E-05 | -0.273 | -0.194 |           |        |     |  |                  |         |
| cg03835038 | 17 | 4,475,000   | 6.62E-06 | -0.273 | -0.237 |           |        |     |  |                  |         |
| cg27444644 | 11 | 55,872,467  | 1.44E-06 | -0.273 | -0.263 |           |        |     |  | <i>OR8H2</i>     | TSS200  |
| cg23219336 | 1  | 153,175,262 | 0.003598 | -0.273 | -0.203 |           |        |     |  | <i>LELP1</i>     | TSS1500 |
| cg02987523 | 13 | 103,978,230 | 0.002032 | -0.273 | -0.216 |           |        |     |  |                  |         |
| cg12733040 | 22 | 17,303,493  | 5.96E-05 | -0.273 | -0.237 |           |        |     |  | <i>XKR3</i>      | TSS1500 |
| cg17187764 | 12 | 7,818,654   | 2.51E-06 | -0.273 | -0.243 |           |        |     |  | <i>APOBEC1</i>   | TSS200  |
| cg22325921 | 4  | 136,482,220 | 0.003179 | -0.273 | -0.208 |           |        |     |  |                  |         |
| cg08513547 | 5  | 150,323,558 | 0.005471 | -0.273 | -0.211 |           |        |     |  | <i>LOC134466</i> | Body    |
| cg03199239 | 19 | 2,588,553   | 7.25E-06 | -0.273 | -0.286 |           |        |     |  | <i>GNG7</i>      | 5'UTR   |
| cg10078143 | 7  | 63,016,835  | 0.002389 | -0.273 | -0.186 |           |        |     |  |                  |         |
| cg23260456 | 2  | 116,474,615 | 0.000104 | -0.273 | -0.255 |           |        |     |  | <i>DPP10</i>     | Body    |
| cg08479865 | 3  | 113,897,550 | 0.004715 | -0.273 | -0.231 |           |        |     |  | <i>DRD3</i>      | 1stExon |
| cg22089701 | 11 | 124,253,666 | 2.98E-05 | -0.273 | -0.267 |           |        |     |  | <i>OR8B2</i>     | TSS1500 |
| cg10792130 | 11 | 38,318,090  | 0.000771 | -0.273 | -0.269 |           |        |     |  |                  |         |
| cg01888566 | 7  | 130,126,513 | 0.038233 | -0.273 | -0.334 |           |        |     |  | <i>MEST</i>      | 5'UTR   |
| cg06005177 | 10 | 135,190,664 | 7.6E-10  | -0.273 | -0.260 |           |        |     |  |                  |         |
| cg03517923 | 3  | 38,870,296  | 0.004556 | -0.273 | -0.222 |           |        |     |  |                  |         |
| cg17542385 | 1  | 152,681,979 | 0.02373  | -0.273 | -0.174 | 0.0000129 | -0.123 |     |  |                  |         |

|            |    |             |          |        |        |          |        |  |                  |         |
|------------|----|-------------|----------|--------|--------|----------|--------|--|------------------|---------|
| cg00586321 | X  | 73,759,065  | 2.82E-08 | -0.273 | -0.243 |          |        |  |                  |         |
| cg03516026 | 1  | 16,564,651  | 1.52E-11 | -0.273 | -0.235 |          |        |  | <i>C1orf89</i>   | TSS1500 |
| cg06699422 | 19 | 43,580,600  | 0.001412 | -0.273 | -0.300 |          |        |  | <i>PSG2</i>      | Body    |
| cg25540032 | 2  | 98,885,650  | 6.1E-09  | -0.273 | -0.244 |          |        |  | <i>VWA3B</i>     | Body    |
| cg21754343 | 1  | 152,658,797 | 0.012835 | -0.273 | -0.186 |          |        |  | <i>LCE2B</i>     | 5'UTR   |
| cg12397274 | 6  | 54,172,183  | 9.73E-10 | -0.274 | -0.281 | 2.43E-09 | -0.158 |  | <i>TINAG</i>     | TSS1500 |
| cg24974845 | 14 | 47,123,298  | 0.003634 | -0.274 | -0.249 |          |        |  |                  |         |
| cg05989672 | 7  | 153,589,306 | 0.007656 | -0.274 | -0.303 |          |        |  | <i>DPP6</i>      | Body    |
| cg23522194 | 19 | 48,565,189  | 0.042405 | -0.274 | -0.260 |          |        |  | <i>PLA2G4C</i>   | Body    |
| cg02155675 | X  | 48,206,388  | 0.000538 | -0.274 | -0.218 |          |        |  | <i>SSX3</i>      | 3'UTR   |
| cg06029700 | 12 | 6,473,311   | 2.12E-07 | -0.274 | -0.280 |          |        |  | <i>SCNN1A</i>    | Body    |
| cg16101080 | 6  | 32,126,315  | 1.12E-08 | -0.274 | -0.263 |          |        |  | <i>PPT2</i>      | Body    |
| cg05926837 | 10 | 50,146,991  | 0.020423 | -0.274 | -0.174 |          |        |  | <i>WDFY4</i>     | Body    |
| cg25444339 | 7  | 75,194,698  | 1.92E-15 | -0.274 | -0.251 |          |        |  | <i>HIP1</i>      | Body    |
| cg24693160 | 11 | 124,438,770 | 5.62E-05 | -0.274 | -0.273 |          |        |  | <i>OR8A1</i>     | TSS1500 |
| cg06003388 | 16 | 59,363,443  | 1.16E-05 | -0.274 | -0.237 |          |        |  |                  |         |
| cg16558307 | 1  | 4,036,538   | 0.005681 | -0.274 | -0.104 |          |        |  |                  |         |
| cg00417710 | 7  | 48,889,641  | 0.000344 | -0.274 | -0.246 |          |        |  |                  |         |
| cg24140586 | 10 | 96,697,436  | 0.00037  | -0.274 | -0.296 |          |        |  | <i>CYP2C9</i>    | TSS1500 |
| cg25475843 | 3  | 95,456,922  | 0.001244 | -0.274 | -0.226 |          |        |  |                  |         |
| cg25728188 | 6  | 12,484,939  | 9.76E-13 | -0.274 | -0.259 |          |        |  |                  |         |
| cg11865900 | X  | 153,215,934 | 2.91E-05 | -0.274 | -0.188 |          |        |  | <i>HCFC1</i>     | Body    |
| cg03225787 | 1  | 158,518,363 | 1.27E-08 | -0.274 | -0.272 |          |        |  | <i>OR6Y1</i>     | TSS1500 |
| cg03598313 | 1  | 208,955,564 | 0.014685 | -0.274 | -0.330 |          |        |  |                  |         |
| cg07164136 | 10 | 108,393,920 | 0.016645 | -0.274 | -0.221 |          |        |  | <i>SORCS1</i>    | Body    |
| cg08818866 | 2  | 33,415,906  | 7.19E-06 | -0.274 | -0.249 |          |        |  | <i>LTBP1</i>     | Body    |
| cg02548132 | 8  | 6,420,242   | 1.87E-05 | -0.274 | -0.225 |          |        |  | <i>ANGPT2</i>    | 1stExon |
| cg19564450 | 2  | 23,023,791  | 2.85E-05 | -0.274 | -0.249 |          |        |  |                  |         |
| cg21719418 | 11 | 105,800,243 | 0.001935 | -0.274 | -0.254 |          |        |  | <i>GRIA4</i>     | Body    |
| cg12145085 | 14 | 73,289,895  | 0.017587 | -0.274 | -0.334 |          |        |  | <i>DPF3</i>      | Body    |
| cg26048897 | 10 | 51,632,982  | 2.1E-06  | -0.274 | -0.245 |          |        |  |                  |         |
| cg00563352 | 5  | 9,765,708   | 0.000881 | -0.274 | -0.284 |          |        |  | <i>LOC285692</i> | Body    |
| cg02451502 | 13 | 22,486,732  | 0.001498 | -0.274 | -0.241 |          |        |  |                  |         |
| cg18237047 | 7  | 5,276,991   | 7.31E-08 | -0.274 | -0.211 |          |        |  |                  |         |

|            |    |             |          |        |        |            |        |  |                  |         |
|------------|----|-------------|----------|--------|--------|------------|--------|--|------------------|---------|
| cg00844298 | 7  | 9,826,908   | 0.00105  | -0.274 | -0.252 |            |        |  |                  |         |
| cg18596794 | 1  | 167,689,891 | 2.72E-09 | -0.274 | -0.241 | 2.67E-08   | -0.150 |  | <i>MPZL1</i>     | TSS1500 |
| cg17497172 | 20 | 30,028,229  | 0.017198 | -0.274 | -0.155 |            |        |  | <i>DEFB123</i>   | TSS200  |
| cg24846807 | 1  | 75,043,066  | 0.001391 | -0.274 | -0.210 |            |        |  | <i>C1orf173</i>  | Body    |
| cg05096681 | 3  | 108,767,055 | 5.12E-10 | -0.274 | -0.264 |            |        |  | <i>MORC1</i>     | Body    |
| cg01025883 | 16 | 23,867,088  | 0.001737 | -0.274 | -0.256 |            |        |  | <i>PRKCB</i>     | Body    |
| cg00224028 | 7  | 84,671,333  | 4.38E-07 | -0.275 | -0.274 |            |        |  | <i>SEMA3D</i>    | Body    |
| cg24525988 | 4  | 19,134,792  | 2.25E-10 | -0.275 | -0.263 |            |        |  |                  |         |
| cg02936740 | 4  | 68,995,995  | 1.08E-08 | -0.275 | -0.268 | 1.4886E-05 | -0.086 |  | <i>TMPRSS11F</i> | TSS1500 |
| cg02016467 | 16 | 801,549     | 3.99E-07 | -0.275 | -0.284 |            |        |  |                  |         |
| cg02459415 | 11 | 55,594,854  | 5.17E-06 | -0.275 | -0.255 |            |        |  | <i>OR5L2</i>     | 1stExon |
| cg04640729 | 12 | 95,864,049  | 3.09E-13 | -0.275 | -0.242 |            |        |  |                  |         |
| cg15036326 | 17 | 27,048,708  | 2.68E-18 | -0.275 | -0.270 |            |        |  | <i>RPL23A</i>    | Body    |
| cg16710348 | 3  | 121,660,655 | 7.95E-11 | -0.275 | -0.262 |            |        |  | <i>SLC15A2</i>   | 3'UTR   |
| cg10436737 | 1  | 170,700,508 | 0.000173 | -0.275 | -0.185 |            |        |  | <i>PRRX1</i>     | Body    |
| cg15236149 | 6  | 153,073,383 | 0.002855 | -0.275 | -0.220 |            |        |  | <i>VIP</i>       | Body    |
| cg06598634 | 4  | 63,416,083  | 0.00142  | -0.275 | -0.290 |            |        |  |                  |         |
| cg18163559 | Y  | 9,742,930   | 0.001234 | -0.275 | -0.269 |            |        |  |                  |         |
| cg11242581 | 5  | 153,565,919 | 0.000817 | -0.275 | -0.167 |            |        |  |                  |         |
| cg19211853 | 13 | 79,968,216  | 0.000282 | -0.275 | -0.221 |            |        |  | <i>RBM26</i>     | Body    |
| cg07691684 | 4  | 16,773,677  | 1.5E-07  | -0.275 | -0.272 |            |        |  | <i>LDB2</i>      | Body    |
| cg00160262 | 1  | 158,533,225 | 2.79E-06 | -0.275 | -0.254 |            |        |  | <i>OR6P1</i>     | 1stExon |
| cg23624133 | 1  | 152,816,168 | 0.002057 | -0.275 | -0.224 |            |        |  | <i>LCE6A</i>     | Body    |
| cg13781096 | X  | 48,216,201  | 0.000749 | -0.275 | -0.235 |            |        |  | <i>SSX3</i>      | TSS200  |
| cg18217048 | 8  | 9,742,024   | 2.26E-05 | -0.275 | -0.266 |            |        |  |                  |         |
| cg25890391 | 12 | 40,938,465  | 7.95E-08 | -0.275 | -0.272 |            |        |  |                  |         |
| cg20446252 | X  | 150,797,951 | 0.000239 | -0.275 | -0.241 |            |        |  | <i>PASD1</i>     | Body    |
| cg03833216 | 17 | 51,603,096  | 2.25E-05 | -0.275 | -0.284 |            |        |  |                  |         |
| cg15900051 | 6  | 158,245,997 | 1.07E-12 | -0.275 | -0.270 |            |        |  | <i>SNX9</i>      | Body    |
| cg09856271 | 3  | 118,620,082 | 7.59E-08 | -0.275 | -0.223 |            |        |  | <i>IGSF11</i>    | 3'UTR   |
| cg14183136 | 2  | 127,736,736 | 0.000848 | -0.275 | -0.183 |            |        |  |                  |         |
| cg16823009 | 4  | 146,823,969 | 0.007262 | -0.275 | -0.104 |            |        |  | <i>ZNF827</i>    | Body    |
| cg15687300 | 8  | 62,084,457  | 0.001013 | -0.275 | -0.312 |            |        |  |                  |         |
| cg15442888 | 4  | 175,789,139 | 0.000331 | -0.275 | -0.274 |            |        |  |                  |         |

|            |    |             |          |        |        |          |        |     |                 |         |
|------------|----|-------------|----------|--------|--------|----------|--------|-----|-----------------|---------|
| cg13883186 | 7  | 142,333,186 | 0.000164 | -0.275 | -0.337 |          |        |     |                 |         |
| cg18192419 | 3  | 128,005,180 | 1.12E-08 | -0.275 | -0.276 |          |        | Yes | <i>EEFSEC</i>   | Body    |
| cg09032499 | 6  | 30,993,705  | 6.12E-06 | -0.275 | -0.210 |          |        |     |                 |         |
| cg10821830 | 2  | 79,823,717  | 0.0019   | -0.275 | -0.229 |          |        |     | <i>CTNNA2</i>   | 5'UTR   |
| cg26275355 | 4  | 12,252,318  | 0.005565 | -0.275 | -0.251 |          |        |     |                 |         |
| cg20143859 | 18 | 56,806,343  | 2.85E-07 | -0.275 | -0.231 |          |        |     | <i>SEC11C</i>   | TSS1500 |
| cg12802876 | 8  | 72,751,354  | 0.002181 | -0.275 | -0.319 |          |        |     |                 |         |
| cg27064482 | 16 | 14,326,543  | 5.46E-08 | -0.275 | -0.302 |          |        |     | <i>MKL2</i>     | Body    |
| cg05912589 | 14 | 20,774,818  | 0.0002   | -0.275 | -0.260 |          |        |     | <i>TTC5</i>     | TSS1500 |
| cg00378658 | 11 | 1,232,347   | 2.04E-06 | -0.275 | -0.292 |          |        |     |                 |         |
| cg16858472 | 8  | 57,067,553  | 8.38E-05 | -0.275 | -0.223 |          |        |     |                 |         |
| cg11313862 | 6  | 152,892,780 | 1.69E-05 | -0.275 | -0.204 |          |        |     | <i>SYNE1</i>    | Body    |
| cg24704759 | 10 | 133,446,251 | 0.000229 | -0.275 | -0.136 |          |        |     |                 |         |
| cg05855124 | 12 | 128,896,756 | 0.017555 | -0.275 | -0.188 |          |        |     | <i>TMEM132C</i> | Body    |
| cg08763351 | 1  | 152,943,210 | 0.013428 | -0.275 | -0.195 | 2.67E-14 | -0.189 |     | <i>SPRR4</i>    | 5'UTR   |
| cg20437660 | 8  | 56,367,005  | 0.002058 | -0.275 | -0.240 |          |        |     | <i>XKR4</i>     | Body    |
| cg25464787 | 1  | 158,904,784 | 6.64E-05 | -0.275 | -0.307 |          |        |     | <i>PYHIN1</i>   | 5'UTR   |
| cg10907582 | 14 | 96,411,400  | 0.005047 | -0.275 | -0.170 |          |        |     |                 |         |
| cg06010711 | 2  | 80,453,645  | 0.002458 | -0.275 | -0.250 |          |        |     | <i>CTNNA2</i>   | Body    |
| cg08448931 | X  | 151,080,620 | 0.00016  | -0.276 | -0.240 |          |        |     | <i>MAGEA4</i>   | TSS1500 |
| cg07037019 | 1  | 159,506,621 | 0.000491 | -0.276 | -0.206 |          |        |     | <i>OR10J5</i>   | TSS1500 |
| cg09320652 | 1  | 66,708,864  | 5.03E-05 | -0.276 | -0.268 |          |        |     | <i>PDE4B</i>    | Body    |
| cg08844770 | 19 | 3,982,903   | 8.14E-20 | -0.276 | -0.247 |          |        |     | <i>EEF2</i>     | Body    |
| cg06219125 | 16 | 24,373,675  | 0.002747 | -0.276 | -0.258 |          |        |     | <i>CACNG3</i>   | 3'UTR   |
| cg06619428 | 1  | 152,659,754 | 0.002365 | -0.276 | -0.212 |          |        |     | <i>LCE2B</i>    | 3'UTR   |
| cg08030662 | 17 | 51,900,534  | 0.002845 | -0.276 | -0.178 |          |        |     | <i>KIF2B</i>    | 1stExon |
| cg25161029 | 11 | 122,845,972 | 5.11E-06 | -0.276 | -0.270 |          |        |     |                 |         |
| cg25766801 | 8  | 2,990,464   | 0.000247 | -0.276 | -0.223 |          |        |     | <i>CSMD1</i>    | Body    |
| cg11411564 | 5  | 160,049,388 | 0.029318 | -0.276 | -0.247 |          |        |     | <i>ATP10B</i>   | Body    |
| cg18026416 | 13 | 48,128,547  | 0.000199 | -0.276 | -0.272 |          |        |     |                 |         |
| cg16510654 | 1  | 16,330,625  | 7.19E-06 | -0.276 | -0.263 |          |        |     | <i>C1orf64</i>  | TSS200  |
| cg20291436 | 4  | 111,539,352 | 1.94E-05 | -0.276 | -0.277 |          |        |     | <i>PITX2</i>    | Body    |
| cg11348583 | 1  | 196,746,875 | 0.027019 | -0.276 | -0.150 |          |        |     | <i>CFHR3</i>    | Body    |
| cg12385165 | 6  | 123,321,699 | 0.000624 | -0.276 | -0.221 |          |        |     | <i>CLVS2</i>    | Body    |

|            |    |             |          |        |        |          |        |  |                 |         |
|------------|----|-------------|----------|--------|--------|----------|--------|--|-----------------|---------|
| cg01566028 | 9  | 123,341,267 | 8.21E-05 | -0.276 | -0.188 |          |        |  | <i>CDK5RAP2</i> | Body    |
| cg05703009 | 11 | 5,841,688   | 3.41E-05 | -0.276 | -0.275 |          |        |  | <i>OR52N2</i>   | 1stExon |
| cg06329587 | 11 | 118,991,065 | 1.43E-13 | -0.276 | -0.276 |          |        |  | <i>HINFP</i>    | TSS1500 |
| cg07611620 | 18 | 8,710,133   | 3.29E-08 | -0.276 | -0.273 |          |        |  |                 |         |
| cg13241144 | 12 | 34,463,891  | 0.000121 | -0.276 | -0.189 |          |        |  |                 |         |
| cg18484189 | 11 | 7,984,973   | 4.25E-07 | -0.276 | -0.259 | 8.33E-24 | -0.274 |  | <i>NLRP10</i>   | 1stExon |
| cg23774016 | 1  | 159,284,082 | 1.48E-13 | -0.276 | -0.253 |          |        |  | <i>OR10J3</i>   | 1stExon |
| cg25940523 | 8  | 132,313,141 | 0.003621 | -0.276 | -0.245 |          |        |  |                 |         |
| cg03271520 | 17 | 3,100,171   | 3.31E-06 | -0.276 | -0.280 |          |        |  | <i>OR1A2</i>    | TSS1500 |
| cg04521543 | 2  | 669,505     | 2.86E-09 | -0.276 | -0.217 |          |        |  | <i>TMEM18</i>   | 3'UTR   |
| cg07219844 | 10 | 135,123,764 | 1.46E-08 | -0.276 | -0.244 |          |        |  | <i>ZNF511</i>   | Body    |
| cg07343027 | 17 | 80,024,200  | 8.49E-05 | -0.276 | -0.243 |          |        |  | <i>DUS1L</i>    | TSS1500 |
| cg17069586 | 11 | 88,189,880  | 1.67E-06 | -0.276 | -0.272 |          |        |  |                 |         |
| cg20556988 | 17 | 32,690,127  | 0.003292 | -0.276 | -0.143 | 9.89E-11 | -0.190 |  | <i>CCL1</i>     | 1stExon |
| cg25696807 | X  | 145,109,374 | 3.67E-07 | -0.276 | -0.276 |          |        |  | <i>MIR891A</i>  | Body    |
| cg03846107 | 12 | 34,061,681  | 3.41E-05 | -0.276 | -0.262 |          |        |  |                 |         |
| cg24906015 | 2  | 58,482,767  | 0.008236 | -0.276 | -0.242 |          |        |  |                 |         |
| cg16108887 | 7  | 25,608,305  | 1.62E-05 | -0.276 | -0.243 |          |        |  |                 |         |
| cg16358044 | 4  | 164,245,970 | 0.003966 | -0.276 | -0.212 |          |        |  | <i>NPY1R</i>    | 3'UTR   |
| cg24051487 | 20 | 11,671,599  | 0.004218 | -0.276 | -0.204 |          |        |  |                 |         |
| cg17342469 | 22 | 46,473,074  | 1.09E-11 | -0.276 | -0.236 |          |        |  |                 |         |
| cg27292547 | 12 | 1,672,440   | 2.47E-06 | -0.276 | -0.263 |          |        |  |                 |         |
| cg14472778 | 1  | 11,867,308  | 3.2E-10  | -0.276 | -0.254 | 1.59E-15 | -0.192 |  | <i>CLCN6</i>    | Body    |
| cg17412901 | 1  | 3,332,705   | 4.59E-05 | -0.277 | -0.169 |          |        |  | <i>PRDM16</i>   | Body    |
| cg14448195 | 7  | 79,086,223  | 2.51E-06 | -0.277 | -0.275 |          |        |  |                 |         |
| cg16372648 | 3  | 150,338,266 | 8.49E-13 | -0.277 | -0.279 |          |        |  | <i>SELT</i>     | Body    |
| cg22519158 | 1  | 152,552,175 | 2.44E-06 | -0.277 | -0.249 |          |        |  | <i>LCE3D</i>    | Body    |
| cg08988420 | 4  | 186,435,488 | 3.97E-05 | -0.277 | -0.328 |          |        |  | <i>PDLIM3</i>   | Body    |
| cg26159860 | 11 | 133,469,193 | 0.013092 | -0.277 | -0.217 |          |        |  |                 |         |
| cg10115387 | 2  | 119,134,313 | 2.46E-07 | -0.277 | -0.277 |          |        |  |                 |         |
| cg21246516 | 6  | 54,668,826  | 0.02273  | -0.277 | -0.192 |          |        |  |                 |         |
| cg03581311 | 4  | 19,457,163  | 0.000345 | -0.277 | -0.225 |          |        |  |                 |         |
| cg25249068 | 3  | 133,118,940 | 3.45E-05 | -0.277 | -0.226 | 2.08E-14 | -0.138 |  | <i>BFSP2</i>    | 1stExon |
| cg02608831 | 8  | 73,856,874  | 1.76E-06 | -0.277 | -0.267 |          |        |  |                 |         |

|            |    |             |          |        |        |          |        |  |                 |         |
|------------|----|-------------|----------|--------|--------|----------|--------|--|-----------------|---------|
| cg17060964 | 11 | 55,796,572  | 5.39E-11 | -0.277 | -0.269 |          |        |  | <i>OR5AS1</i>   | TSS1500 |
| cg19953452 | 17 | 254,590     | 0.000309 | -0.277 | -0.272 |          |        |  |                 |         |
| cg22842882 | X  | 85,517,184  | 0.017709 | -0.277 | -0.369 |          |        |  | <i>DACH2</i>    | Body    |
| cg13906823 | 1  | 161,008,824 | 8.45E-26 | -0.277 | -0.289 |          |        |  | <i>TSTD1</i>    | TSS200  |
| cg23708209 | 15 | 88,843,899  | 0.000378 | -0.277 | -0.261 |          |        |  |                 |         |
| cg02288969 | 1  | 172,413,492 | 7.89E-17 | -0.277 | -0.281 |          |        |  | <i>C1orf105</i> | Body    |
| cg03478630 | 10 | 10,436,568  | 4.57E-07 | -0.277 | -0.316 |          |        |  |                 |         |
| cg02696798 | 10 | 107,301,935 | 1.23E-06 | -0.277 | -0.261 |          |        |  |                 |         |
| cg20699839 | 5  | 4,942,023   | 0.045321 | -0.277 | -0.181 |          |        |  |                 |         |
| cg00319312 | 1  | 203,671,140 | 4.75E-11 | -0.277 | -0.263 |          |        |  | <i>ATP2B4</i>   | Body    |
| cg10633609 | 4  | 190,705,649 | 1.1E-06  | -0.277 | -0.287 |          |        |  |                 |         |
| cg13606495 | 14 | 101,202,747 | 9.03E-06 | -0.277 | -0.238 |          |        |  |                 |         |
| cg21472835 | 4  | 46,874,750  | 0.000577 | -0.277 | -0.204 |          |        |  | <i>COX7B2</i>   | 5'UTR   |
| cg26349048 | 11 | 55,682,099  | 0.000751 | -0.277 | -0.278 |          |        |  | <i>OR5W2</i>    | TSS200  |
| cg04993112 | 1  | 153,030,514 | 0.000344 | -0.277 | -0.186 |          |        |  | <i>SPRR2A</i>   | TSS1500 |
| cg15227168 | 18 | 73,630,290  | 0.002666 | -0.277 | -0.213 |          |        |  |                 |         |
| cg23172911 | 1  | 165,880,082 | 1.44E-09 | -0.277 | -0.255 |          |        |  |                 |         |
| cg02228042 | 7  | 105,603,432 | 5.86E-09 | -0.277 | -0.285 |          |        |  | <i>FLJ23834</i> | TSS1500 |
| cg21908886 | 1  | 166,039,444 | 2.89E-05 | -0.277 | -0.338 |          |        |  | <i>FAM78B</i>   | 3'UTR   |
| cg11388664 | 1  | 159,140,372 | 0.000564 | -0.277 | -0.248 |          |        |  | <i>CADM3</i>    | TSS1500 |
| cg11446507 | 10 | 132,692,284 | 0.0021   | -0.277 | -0.197 |          |        |  |                 |         |
| cg22736624 | 1  | 209,365,350 | 2.57E-08 | -0.277 | -0.250 |          |        |  |                 |         |
| cg08291907 | 10 | 53,011,793  | 0.011191 | -0.277 | -0.169 |          |        |  | <i>PRKG1</i>    | Body    |
| cg05283685 | 11 | 92,001,577  | 3.31E-05 | -0.277 | -0.292 |          |        |  |                 |         |
| cg06497921 | 2  | 11,796,786  | 4.76E-07 | -0.277 | -0.296 |          |        |  |                 |         |
| cg18538751 | 2  | 233,879,149 | 6.22E-06 | -0.277 | -0.190 |          |        |  | <i>NGEF</i>     | TSS1500 |
| cg00955547 | 21 | 19,614,112  | 0.000155 | -0.277 | -0.242 |          |        |  |                 |         |
| cg19130189 | 8  | 89,241,632  | 1.03E-10 | -0.277 | -0.269 |          |        |  | <i>MMP16</i>    | Body    |
| cg03649574 | 1  | 158,066,515 | 0.016959 | -0.277 | -0.192 |          |        |  |                 |         |
| cg18224395 | 19 | 50,037,880  | 1.55E-12 | -0.277 | -0.250 |          |        |  | <i>RCN3</i>     | Body    |
| cg01604429 | 11 | 18,208,699  | 0.000549 | -0.277 | -0.221 |          |        |  |                 |         |
| cg20676475 | 1  | 152,552,494 | 0.001453 | -0.277 | -0.225 | 5.66E-21 | -0.239 |  | <i>LCE3D</i>    | 5'UTR   |
| cg07908874 | 10 | 135,123,006 | 3.09E-12 | -0.277 | -0.279 | 4.41E-23 | -0.175 |  | <i>ZNF511</i>   | Body    |
| cg08622675 | 7  | 6,524,998   | 2.77E-05 | -0.277 | -0.280 |          |        |  | <i>KDELR2</i>   | TSS1500 |

|            |    |             |          |        |        |            |        |  |                  |         |
|------------|----|-------------|----------|--------|--------|------------|--------|--|------------------|---------|
| cg10019018 | 12 | 119,214,021 | 9.7E-05  | -0.277 | -0.302 |            |        |  |                  |         |
| cg10021786 | 16 | 46,964,129  | 1.31E-05 | -0.277 | -0.195 |            |        |  | <i>GPT2</i>      | 3'UTR   |
| cg27560687 | 7  | 62,555,691  | 0.000998 | -0.277 | -0.156 |            |        |  |                  |         |
| cg07478662 | 19 | 5,047,466   | 1.39E-05 | -0.277 | -0.172 |            |        |  | <i>KDM4B</i>     | Body    |
| cg21756355 | 7  | 2,233,135   | 7.69E-08 | -0.277 | -0.274 |            |        |  | <i>MAD1L1</i>    | Body    |
| cg17101720 | 8  | 89,278,806  | 0.000222 | -0.277 | -0.202 |            |        |  | <i>MMP16</i>     | Body    |
| cg25856811 | 1  | 152,973,957 | 0.009175 | -0.278 | -0.254 | 4.45E-19   | -0.223 |  | <i>SPRR3</i>     | TSS1500 |
| cg26965236 | 8  | 13,434,991  | 4.74E-09 | -0.278 | -0.271 |            |        |  |                  |         |
| cg23693487 | 8  | 30,670,746  | 5.59E-07 | -0.278 | -0.262 |            |        |  | <i>PPP2CB</i>    | TSS1500 |
| cg05245416 | 2  | 105,087,010 | 0.025864 | -0.278 | -0.174 |            |        |  | <i>LOC150568</i> | Body    |
| cg01053349 | Y  | 3,446,859   | 0.000241 | -0.278 | -0.238 |            |        |  | <i>TGIF2LY</i>   | TSS1500 |
| cg00169930 | 4  | 736,398     | 4.08E-06 | -0.278 | -0.190 |            |        |  | <i>PCGF3</i>     | Body    |
| cg03596479 | 11 | 88,059,873  | 7.63E-05 | -0.278 | -0.249 |            |        |  | <i>CTSC</i>      | Body    |
| cg20653032 | 11 | 7,259,254   | 0.000201 | -0.278 | -0.308 |            |        |  |                  |         |
| cg03105556 | 2  | 80,329,553  | 0.001723 | -0.278 | -0.290 |            |        |  | <i>CTNNA2</i>    | Body    |
| cg22152492 | 6  | 28,554,334  | 2.71E-08 | -0.278 | -0.270 |            |        |  | <i>SCAND3</i>    | 1stExon |
| cg07356283 | 10 | 135,030,513 | 0.001749 | -0.278 | -0.125 |            |        |  | <i>KNDC1</i>     | Body    |
| cg26793019 | 8  | 2,795,929   | 0.020204 | -0.278 | -0.211 |            |        |  | <i>CSMD1</i>     | 3'UTR   |
| cg14649589 | 8  | 56,578,622  | 0.000555 | -0.278 | -0.245 |            |        |  |                  |         |
| cg06046216 | 1  | 247,680,201 | 3.49E-05 | -0.278 | -0.221 |            |        |  |                  |         |
| cg06909646 | 1  | 32,681,593  | 6.08E-18 | -0.278 | -0.289 |            |        |  | <i>DCDC2B</i>    | 3'UTR   |
| cg12811284 | 1  | 158,688,804 | 6.61E-08 | -0.278 | -0.250 |            |        |  | <i>OR6K3</i>     | TSS1500 |
| cg22739858 | 5  | 142,053,365 | 5E-07    | -0.278 | -0.213 |            |        |  | <i>FGF1</i>      | 5'UTR   |
| cg13945631 | 12 | 34,551,489  | 0.000376 | -0.278 | -0.231 |            |        |  |                  |         |
| cg23726802 | 7  | 155,617,398 | 4.41E-06 | -0.278 | -0.284 |            |        |  |                  |         |
| cg01033360 | 19 | 3,381,432   | 5.47E-07 | -0.278 | -0.264 |            |        |  | <i>NFIC</i>      | Body    |
| cg09552123 | 1  | 152,849,783 | 0.001356 | -0.278 | -0.222 |            |        |  | <i>SMCP</i>      | TSS1500 |
| cg03072195 | 17 | 51,900,115  | 0.001701 | -0.278 | -0.253 |            |        |  | <i>KIF2B</i>     | TSS200  |
| cg18766755 | 1  | 153,029,939 | 1.06E-06 | -0.278 | -0.246 | 5.47E-07   | -0.158 |  | <i>SPRR2A</i>    | 5'UTR   |
| cg04797323 | 12 | 93,966,978  | 1.95E-13 | -0.278 | -0.250 | 0.01836539 | -0.058 |  | <i>SOCS2</i>     | Body    |
| cg10352303 | 16 | 87,100,972  | 0.000835 | -0.278 | -0.193 |            |        |  |                  |         |
| cg14151317 | 9  | 139,916,869 | 0.002805 | -0.278 | -0.285 |            |        |  | <i>ABCA2</i>     | Body    |
| cg21135483 | 21 | 42,830,710  | 0.016592 | -0.278 | -0.314 |            |        |  | <i>MX1</i>       | 3'UTR   |
| cg21752758 | 8  | 73,848,532  | 0.005113 | -0.278 | -0.212 |            |        |  | <i>KCNB2</i>     | Body    |

|            |    |             |          |        |        |  |  |  |                    |         |
|------------|----|-------------|----------|--------|--------|--|--|--|--------------------|---------|
| cg09342225 | 11 | 101,668,461 | 0.030382 | -0.278 | -0.321 |  |  |  |                    |         |
| cg21414251 | 6  | 29,364,554  | 1.13E-07 | -0.278 | -0.238 |  |  |  | <i>OR12D2</i>      | 1stExon |
| cg01820213 | 14 | 104,645,063 | 0.000152 | -0.278 | -0.264 |  |  |  | <i>KIF26A</i>      | Body    |
| cg12388838 | 5  | 4,941,467   | 0.004252 | -0.278 | -0.192 |  |  |  |                    |         |
| cg26200239 | 11 | 118,013,431 | 6.1E-13  | -0.278 | -0.284 |  |  |  | <i>SCN4B</i>       | Body    |
| cg01069648 | 2  | 237,906,688 | 6.68E-10 | -0.278 | -0.235 |  |  |  |                    |         |
| cg12854428 | 8  | 89,281,994  | 0.000563 | -0.278 | -0.177 |  |  |  | <i>MMP16</i>       | Body    |
| cg17449026 | 1  | 75,100,556  | 0.002616 | -0.278 | -0.209 |  |  |  | <i>C1orf173</i>    | Body    |
| cg03281194 | 1  | 2,776,972   | 0.001137 | -0.278 | -0.218 |  |  |  |                    |         |
| cg20058187 | 11 | 121,665,730 | 0.001756 | -0.278 | -0.224 |  |  |  |                    |         |
| cg02813121 | 1  | 153,348,911 | 0.005648 | -0.278 | -0.188 |  |  |  | <i>S100A12</i>     | TSS1500 |
| cg00350503 | 19 | 13,613,614  | 0.002429 | -0.278 | -0.243 |  |  |  | <i>CACNA1A</i>     | Body    |
| cg15471388 | 14 | 49,360,792  | 2.45E-06 | -0.278 | -0.282 |  |  |  |                    |         |
| cg05198244 | 21 | 26,732,918  | 0.000588 | -0.278 | -0.270 |  |  |  |                    |         |
| cg17625224 | 22 | 47,031,262  | 8.66E-14 | -0.278 | -0.270 |  |  |  | <i>GRAMD4</i>      | Body    |
| cg21229718 | 5  | 148,894,958 | 5.45E-10 | -0.279 | -0.257 |  |  |  | <i>CSNK1A1</i>     | Body    |
| cg02202502 | 16 | 86,371,442  | 7.88E-05 | -0.279 | -0.232 |  |  |  | <i>LOC732275</i>   | Body    |
| cg05922429 | 12 | 7,077,914   | 9.24E-10 | -0.279 | -0.256 |  |  |  | <i>PHB2</i>        | Body    |
| cg21070669 | 12 | 57,885,563  | 7.93E-07 | -0.279 | -0.261 |  |  |  | <i>MARS</i>        | Body    |
| cg05031931 | 7  | 214,779     | 0.000392 | -0.279 | -0.106 |  |  |  | <i>FAM20C</i>      | Body    |
| cg08231096 | 2  | 137,748,460 | 3.13E-05 | -0.279 | -0.273 |  |  |  | <i>THSD7B</i>      | TSS200  |
| cg12987138 | 5  | 10,047,253  | 0.003128 | -0.279 | -0.244 |  |  |  |                    |         |
| cg16157895 | 14 | 93,412,666  | 7.84E-10 | -0.279 | -0.220 |  |  |  | <i>ITPK1</i>       | Body    |
| cg00246768 | 8  | 3,245,147   | 0.004437 | -0.279 | -0.232 |  |  |  | <i>CSMD1</i>       | Body    |
| cg19830128 | 20 | 29,995,343  | 5.87E-06 | -0.279 | -0.245 |  |  |  | <i>DEFB121</i>     | TSS1500 |
| cg04546097 | 3  | 120,401,058 | 1.37E-08 | -0.279 | -0.276 |  |  |  | <i>HGD</i>         | 1stExon |
| cg26735980 | 16 | 83,195,465  | 0.000506 | -0.279 | -0.211 |  |  |  | <i>CDH13</i>       | Body    |
| cg27321750 | 22 | 45,148,218  | 1.17E-11 | -0.279 | -0.260 |  |  |  | <i>ARHGAP8</i>     | TSS1500 |
| cg02556071 | 11 | 105,010,284 | 2.32E-05 | -0.279 | -0.293 |  |  |  | <i>CARD18</i>      | Body    |
| cg14612733 | 1  | 155,103,569 | 1.45E-12 | -0.279 | -0.291 |  |  |  | <i>EFNA1</i>       | Body    |
| cg17327828 | 14 | 101,435,254 | 0.00017  | -0.279 | -0.267 |  |  |  | <i>SNORD114-12</i> | TSS200  |
| cg07148968 | 10 | 26,072,483  | 6.38E-05 | -0.279 | -0.286 |  |  |  |                    |         |
| cg09551916 | 1  | 196,911,888 | 0.00203  | -0.279 | -0.261 |  |  |  | <i>CFHR2</i>       | TSS1500 |
| cg10276272 | 16 | 10,271,822  | 0.013835 | -0.279 | -0.209 |  |  |  | <i>GRIN2A</i>      | Body    |



|            |    |             |          |        |        |  |  |  |     |                  |         |
|------------|----|-------------|----------|--------|--------|--|--|--|-----|------------------|---------|
| cg02431866 | 8  | 14,710,899  | 0.000353 | -0.279 | -0.300 |  |  |  |     | <i>SGCZ</i>      | Body    |
| cg21129006 | 12 | 4,023,078   | 0.017798 | -0.279 | -0.165 |  |  |  |     |                  |         |
| cg18242400 | 4  | 62,384,183  | 6.59E-05 | -0.279 | -0.205 |  |  |  |     | <i>LPHN3</i>     | Body    |
| cg27190398 | 16 | 731,844     | 2.89E-12 | -0.279 | -0.289 |  |  |  |     | <i>STUB1</i>     | Body    |
| cg05946604 | 17 | 3,119,329   | 2.56E-05 | -0.279 | -0.215 |  |  |  |     | <i>OR1A1</i>     | 1stExon |
| cg05343184 | 1  | 3,058,151   | 0.01235  | -0.279 | -0.097 |  |  |  |     | <i>PRDM16</i>    | Body    |
| cg11141743 | 4  | 17,188,725  | 0.000257 | -0.279 | -0.253 |  |  |  |     |                  |         |
| cg17000021 | 20 | 54,933,521  | 1.17E-06 | -0.279 | -0.265 |  |  |  |     | <i>C20orf108</i> | TSS1500 |
| cg25228280 | 19 | 22,321,700  | 0.001044 | -0.279 | -0.212 |  |  |  |     |                  |         |
| cg11720863 | 14 | 24,604,040  | 7.52E-11 | -0.279 | -0.278 |  |  |  |     | <i>PSME1</i>     | TSS1500 |
| cg12521910 | X  | 52,897,630  | 0.003513 | -0.279 | -0.233 |  |  |  |     | <i>XAGE3</i>     | TSS1500 |
| cg19651184 | 4  | 77,491,762  | 7.16E-15 | -0.279 | -0.272 |  |  |  |     | <i>SHROOM3</i>   | Body    |
| cg08305879 | 8  | 2,127,340   | 0.003447 | -0.279 | -0.192 |  |  |  |     |                  |         |
| cg03602321 | 5  | 3,962,083   | 0.00029  | -0.279 | -0.224 |  |  |  |     |                  |         |
| cg16438841 | 12 | 132,149,724 | 0.004849 | -0.279 | -0.203 |  |  |  |     |                  |         |
| cg25597055 | 1  | 38,002,922  | 1.15E-10 | -0.279 | -0.245 |  |  |  |     | <i>SNIP1</i>     | 3'UTR   |
| cg16473797 | 20 | 61,755,045  | 1.98E-07 | -0.279 | -0.218 |  |  |  |     |                  |         |
| cg00804796 | 13 | 112,624,756 | 0.014737 | -0.279 | -0.127 |  |  |  |     |                  |         |
| cg17421062 | 1  | 153,432,054 | 2.68E-07 | -0.279 | -0.249 |  |  |  |     | <i>S100A7</i>    | 5'UTR   |
| cg13461554 | 2  | 49,037,725  | 1.21E-05 | -0.279 | -0.313 |  |  |  |     |                  |         |
| cg26781464 | 8  | 81,552,714  | 5.49E-08 | -0.279 | -0.298 |  |  |  |     | <i>ZNF704</i>    | 3'UTR   |
| cg23919844 | 13 | 111,819,481 | 1.35E-07 | -0.279 | -0.262 |  |  |  |     | <i>ARHGEF7</i>   | Body    |
| cg10649130 | 11 | 9,682,641   | 1.12E-10 | -0.279 | -0.276 |  |  |  |     |                  |         |
| cg22794244 | 11 | 123,892,873 | 3.5E-07  | -0.279 | -0.247 |  |  |  |     | <i>OR10G9</i>    | TSS1500 |
| cg02498177 | 16 | 51,174,131  | 0.000906 | -0.279 | -0.198 |  |  |  |     | <i>SALL1</i>     | Body    |
| cg20344820 | X  | 114,058,123 | 0.001828 | -0.279 | -0.370 |  |  |  |     | <i>HTR2C</i>     | Body    |
| cg06629644 | 12 | 131,570,492 | 0.00798  | -0.279 | -0.156 |  |  |  |     | <i>GPR133</i>    | Body    |
| cg14510688 | 12 | 132,423,726 | 2.26E-05 | -0.279 | -0.245 |  |  |  |     | <i>PUS1</i>      | Body    |
| cg25467710 | 1  | 185,780,629 | 0.000229 | -0.279 | -0.233 |  |  |  |     | <i>HMCN1</i>     | Body    |
| cg20159490 | 6  | 66,493,769  | 0.001034 | -0.279 | -0.282 |  |  |  |     |                  |         |
| cg24347498 | 1  | 160,456,459 | 0.000156 | -0.279 | -0.225 |  |  |  |     | <i>SLAMF6</i>    | 3'UTR   |
| cg12243622 | 17 | 32,633,974  | 0.007261 | -0.279 | -0.169 |  |  |  |     |                  |         |
| cg27130665 | 11 | 40,316,514  | 5.76E-05 | -0.279 | -0.296 |  |  |  |     | <i>LRRC4C</i>    | TSS1500 |
| cg11394278 | 22 | 49,566,994  | 0.001807 | -0.279 | -0.176 |  |  |  | Yes |                  |         |

|            |    |             |          |        |        |          |        |  |                  |         |
|------------|----|-------------|----------|--------|--------|----------|--------|--|------------------|---------|
| cg14800014 | 5  | 125,800,764 | 6.56E-07 | -0.279 | -0.290 |          |        |  | <i>GRAMD3</i>    | Body    |
| cg02785745 | 2  | 84,745,831  | 1.52E-09 | -0.279 | -0.264 |          |        |  | <i>DNAH6</i>     | Body    |
| cg20686446 | 19 | 50,320,090  | 0.004076 | -0.279 | -0.238 |          |        |  | <i>MED25</i>     | TSS1500 |
| cg24980638 | 10 | 73,553,196  | 4.49E-07 | -0.279 | -0.217 |          |        |  | <i>CDH23</i>     | Body    |
| cg04533266 | 3  | 191,855,359 | 0.000113 | -0.280 | -0.223 |          |        |  |                  |         |
| cg16909742 | 2  | 127,635,678 | 0.004024 | -0.280 | -0.198 |          |        |  |                  |         |
| cg24933651 | 3  | 77,147,070  | 0.002632 | -0.280 | -0.234 |          |        |  | <i>ROBO2</i>     | TSS200  |
| cg01792749 | 3  | 38,835,179  | 4.34E-05 | -0.280 | -0.295 |          |        |  | <i>SCN10A</i>    | Body    |
| cg05807420 | 7  | 83,314,331  | 1.45E-05 | -0.280 | -0.280 |          |        |  |                  |         |
| cg22374415 | 2  | 188,210,673 | 4.2E-05  | -0.280 | -0.231 |          |        |  | <i>CALCRL</i>    | 3'UTR   |
| cg18482656 | 5  | 180,167,965 | 0.001017 | -0.280 | -0.245 |          |        |  | <i>OR2Y1</i>     | TSS1500 |
| cg13298997 | 7  | 32,038,956  | 2.64E-05 | -0.280 | -0.260 |          |        |  | <i>PDE1C</i>     | Body    |
| cg09721595 | 11 | 77,773,924  | 0.000245 | -0.280 | -0.235 |          |        |  | <i>THRSP</i>     | TSS1500 |
| cg21643265 | 12 | 120,963,957 | 3.79E-07 | -0.280 | -0.224 |          |        |  | <i>COQ5</i>      | Body    |
| cg21727907 | 13 | 19,751,364  | 0.003697 | -0.280 | -0.253 |          |        |  | <i>TUBA3C</i>    | Body    |
| cg27291231 | 9  | 140,081,916 | 5.33E-07 | -0.280 | -0.276 | 3.31E-28 | -0.179 |  | <i>ANAPC2</i>    | Body    |
| cg03019112 | 14 | 101,518,520 | 0.004862 | -0.280 | -0.325 |          |        |  | <i>MIR487A</i>   | TSS1500 |
| cg17419731 | 7  | 5,535,731   | 7.98E-07 | -0.280 | -0.199 |          |        |  | <i>MIR589</i>    | TSS200  |
| cg18362003 | 11 | 122,051,630 | 0.009246 | -0.280 | -0.245 |          |        |  | <i>LOC399959</i> | Body    |
| cg17161266 | 7  | 49,907,002  | 0.000489 | -0.280 | -0.307 |          |        |  | <i>VWC2</i>      | Body    |
| cg11153808 | X  | 151,903,039 | 0.008882 | -0.280 | -0.130 |          |        |  | <i>MAGEA12</i>   | 5'UTR   |
| cg24667758 | 18 | 24,283,696  | 0.000116 | -0.280 | -0.195 |          |        |  | <i>LOC728606</i> | TSS200  |
| cg19521511 | 7  | 57,509,813  | 7.52E-05 | -0.280 | -0.224 |          |        |  | <i>ZNF716</i>    | TSS200  |
| cg03094083 | 17 | 26,864,469  | 2.69E-08 | -0.280 | -0.230 |          |        |  | <i>FOXN1</i>     | 3'UTR   |
| cg09508275 | 11 | 55,890,274  | 0.000283 | -0.280 | -0.234 |          |        |  | <i>OR8H3</i>     | 1stExon |
| cg17008031 | 11 | 104,972,907 | 3.37E-05 | -0.280 | -0.267 |          |        |  | <i>CASP1</i>     | TSS1500 |
| cg00667789 | 1  | 59,042,065  | 0.006234 | -0.280 | -0.326 |          |        |  | <i>TACSTD2</i>   | 1stExon |
| cg04064998 | 11 | 109,786,133 | 0.000115 | -0.280 | -0.280 |          |        |  |                  |         |
| cg23753006 | 2  | 143,044,057 | 0.002331 | -0.280 | -0.253 |          |        |  |                  |         |
| cg05807849 | 11 | 132,946,692 | 0.00135  | -0.280 | -0.229 |          |        |  | <i>OPCML</i>     | Body    |
| cg26014281 | 7  | 157,227,226 | 0.003688 | -0.280 | -0.236 |          |        |  |                  |         |
| cg01763692 | 4  | 128,064,781 | 0.00062  | -0.280 | -0.302 |          |        |  |                  |         |
| cg00404599 | X  | 107,018,431 | 1.51E-09 | -0.280 | -0.247 | 1.58E-12 | -0.142 |  | <i>TSC22D3</i>   | 1stExon |
| cg19002907 | 10 | 115,939,579 | 1.94E-08 | -0.280 | -0.276 |          |        |  | <i>TDRD1</i>     | 5'UTR   |

|            |    |             |          |        |        |            |        |  |                |         |
|------------|----|-------------|----------|--------|--------|------------|--------|--|----------------|---------|
| cg27117476 | 14 | 47,120,795  | 3.84E-05 | -0.280 | -0.287 |            |        |  | <i>RPL10L</i>  | 1stExon |
| cg07172237 | X  | 134,158,728 | 2.31E-08 | -0.280 | -0.284 |            |        |  |                |         |
| cg14220224 | 8  | 57,309,145  | 1.17E-10 | -0.280 | -0.309 |            |        |  | <i>SDR16C6</i> | TSS1500 |
| cg21411834 | 1  | 215,740,071 | 1.58E-13 | -0.280 | -0.247 |            |        |  | <i>KCTD3</i>   | TSS1500 |
| cg21679730 | 1  | 65,047,485  | 2.45E-10 | -0.280 | -0.264 |            |        |  | <i>CACHD1</i>  | Body    |
| cg14917100 | 2  | 127,528,627 | 0.001074 | -0.280 | -0.247 |            |        |  |                |         |
| cg13466700 | 6  | 155,776,951 | 0.00684  | -0.280 | -0.123 |            |        |  | <i>NOX3</i>    | 1stExon |
| cg27273125 | X  | 111,919,438 | 1.57E-07 | -0.280 | -0.280 |            |        |  | <i>LHFPL1</i>  | 5'UTR   |
| cg22609474 | 5  | 152,279,040 | 0.000237 | -0.280 | -0.273 |            |        |  |                |         |
| cg02387612 | 11 | 55,889,797  | 2.39E-06 | -0.280 | -0.270 |            |        |  | <i>OR8H3</i>   | TSS200  |
| cg27404351 | 11 | 123,847,741 | 7.74E-09 | -0.280 | -0.276 |            |        |  | <i>OR10S1</i>  | 1stExon |
| cg02892624 | 1  | 153,432,128 | 0.000179 | -0.280 | -0.292 |            |        |  | <i>S100A7</i>  | 5'UTR   |
| cg03361085 | 11 | 1,324,625   | 0.000283 | -0.280 | -0.317 |            |        |  | <i>TOLLIP</i>  | Body    |
| cg14148088 | 14 | 101,495,827 | 2.17E-06 | -0.280 | -0.283 |            |        |  | <i>MIR494</i>  | TSS200  |
| cg00584456 | 8  | 7,191,273   | 0.001189 | -0.280 | -0.192 |            |        |  | <i>FAM66B</i>  | Body    |
| cg15693415 | 5  | 114,510,474 | 3.76E-10 | -0.280 | -0.286 |            |        |  | <i>TRIM36</i>  | Body    |
| cg23890876 | 17 | 80,046,815  | 0.002304 | -0.280 | -0.160 |            |        |  | <i>FASN</i>    | Body    |
| cg05931366 | 20 | 62,957,648  | 0.00015  | -0.280 | -0.287 |            |        |  |                |         |
| cg09118749 | 1  | 21,952,566  | 1.15E-12 | -0.280 | -0.274 |            |        |  | <i>RAP1GAP</i> | Body    |
| cg08288942 | 12 | 127,329,056 | 0.011505 | -0.281 | -0.213 |            |        |  |                |         |
| cg10619731 | 12 | 127,765,627 | 7.57E-05 | -0.281 | -0.259 |            |        |  |                |         |
| cg13239713 | 1  | 229,229,512 | 1.61E-08 | -0.281 | -0.286 |            |        |  |                |         |
| cg14162076 | 12 | 8,665,092   | 0.003548 | -0.281 | -0.249 | 6.67E-08   | -0.125 |  | <i>CLEC4D</i>  | TSS1500 |
| cg17323171 | 11 | 103,908,255 | 0.006823 | -0.281 | -0.152 |            |        |  | <i>PDGFD</i>   | Body    |
| cg21995710 | 2  | 32,514,311  | 2.61E-10 | -0.281 | -0.219 |            |        |  | <i>YIPF4</i>   | Body    |
| cg24040450 | 1  | 196,578,863 | 9.1E-11  | -0.281 | -0.271 |            |        |  | <i>KCNT2</i>   | TSS1500 |
| cg17267493 | 17 | 7,460,485   | 0.002344 | -0.281 | -0.168 | 0.00335356 | -0.056 |  | <i>TNFSF12</i> | Body    |
| cg01748263 | 3  | 193,097,361 | 3.43E-06 | -0.281 | -0.246 |            |        |  | <i>ATP13A5</i> | TSS1500 |
| cg02006324 | 8  | 2,997,052   | 0.0069   | -0.281 | -0.171 |            |        |  | <i>CSMD1</i>   | Body    |
| cg25636481 | 6  | 33,241,410  | 4.93E-15 | -0.281 | -0.250 |            |        |  | <i>RPS18</i>   | Body    |
| cg17242596 | 11 | 132,527,296 | 0.003265 | -0.281 | -0.273 |            |        |  | <i>OPCML</i>   | Body    |
| cg20055924 | 2  | 32,587,004  | 1.87E-05 | -0.281 | -0.228 |            |        |  | <i>BIRC6</i>   | Body    |
| cg09175734 | 5  | 169,510,081 | 0.000313 | -0.281 | -0.237 |            |        |  | <i>DOCK2</i>   | 3'UTR   |
| cg19420720 | 17 | 79,816,504  | 2.77E-13 | -0.281 | -0.272 |            |        |  | <i>P4HB</i>    | Body    |

|            |    |             |          |        |        |  |  |  |                  |         |
|------------|----|-------------|----------|--------|--------|--|--|--|------------------|---------|
| cg00767395 | 2  | 88,583,117  | 0.000812 | -0.281 | -0.240 |  |  |  |                  |         |
| cg02091185 | 5  | 170,288,766 | 1.38E-05 | -0.281 | -0.283 |  |  |  | <i>RANBP17</i>   | TSS1500 |
| cg01526177 | 4  | 9,379,166   | 0.000539 | -0.281 | -0.221 |  |  |  |                  |         |
| cg03957884 | 13 | 23,471,850  | 0.008141 | -0.281 | -0.153 |  |  |  |                  |         |
| cg06580800 | 19 | 39,921,535  | 3.61E-12 | -0.281 | -0.277 |  |  |  |                  |         |
| cg27383876 | 11 | 103,833,427 | 0.000122 | -0.281 | -0.289 |  |  |  | <i>PDGFD</i>     | Body    |
| cg09550024 | 10 | 96,698,366  | 2.69E-05 | -0.281 | -0.255 |  |  |  | <i>CYP2C9</i>    | TSS200  |
| cg11125758 | 14 | 83,591,622  | 0.001763 | -0.281 | -0.320 |  |  |  |                  |         |
| cg26177807 | 8  | 89,688,361  | 0.004925 | -0.281 | -0.219 |  |  |  |                  |         |
| cg19514542 | 10 | 125,614,284 | 0.000313 | -0.281 | -0.264 |  |  |  | <i>CPXM2</i>     | Body    |
| cg19989498 | 10 | 87,336,967  | 2.94E-05 | -0.281 | -0.300 |  |  |  |                  |         |
| cg16704703 | 10 | 3,509,710   | 4.28E-11 | -0.281 | -0.298 |  |  |  |                  |         |
| cg22830091 | 7  | 75,961,684  | 2.06E-10 | -0.281 | -0.319 |  |  |  | <i>YWHAG</i>     | Body    |
| cg11794033 | 6  | 31,275,267  | 1.68E-08 | -0.281 | -0.289 |  |  |  |                  |         |
| cg19312356 | 1  | 160,520,625 | 0.00101  | -0.281 | -0.252 |  |  |  | <i>CD84</i>      | Body    |
| cg08653574 | 22 | 29,838,687  | 0.000345 | -0.281 | -0.231 |  |  |  | <i>RFPL1S</i>    | TSS1500 |
| cg06483559 | 11 | 123,624,914 | 8.39E-05 | -0.281 | -0.287 |  |  |  | <i>OR6X1</i>     | 1stExon |
| cg16280363 | 12 | 57,882,891  | 7.39E-08 | -0.281 | -0.236 |  |  |  | <i>MARS</i>      | Body    |
| cg11863863 | 17 | 75,706,410  | 0.000818 | -0.281 | -0.195 |  |  |  |                  |         |
| cg16466750 | 7  | 214,685     | 5.72E-13 | -0.281 | -0.252 |  |  |  | <i>FAM20C</i>    | Body    |
| cg13922442 | 7  | 38,312,366  | 0.000137 | -0.281 | -0.279 |  |  |  | <i>TARP</i>      | 5'UTR   |
| cg00067884 | 15 | 63,970,198  | 1.97E-10 | -0.281 | -0.305 |  |  |  | <i>HERC1</i>     | Body    |
| cg05180522 | 14 | 98,101,740  | 0.00013  | -0.281 | -0.225 |  |  |  |                  |         |
| cg17222000 | 4  | 168,937,817 | 2.79E-05 | -0.281 | -0.244 |  |  |  |                  |         |
| cg06203976 | 1  | 159,140,445 | 0.00282  | -0.282 | -0.222 |  |  |  | <i>CADM3</i>     | TSS1500 |
| cg04064672 | X  | 141,290,567 | 0.005185 | -0.282 | -0.247 |  |  |  | <i>MAGEC2</i>    | 3'UTR   |
| cg06552160 | 2  | 1,926,724   | 0.000269 | -0.282 | -0.291 |  |  |  | <i>MYT1L</i>     | Body    |
| cg20043679 | 2  | 84,517,321  | 0.000553 | -0.282 | -0.251 |  |  |  | <i>LOC388965</i> | TSS1500 |
| cg12203557 | 10 | 88,590,318  | 2.22E-07 | -0.282 | -0.260 |  |  |  | <i>BMPR1A</i>    | 5'UTR   |
| cg15746253 | 8  | 133,141,656 | 0.002491 | -0.282 | -0.227 |  |  |  | <i>KCNQ3</i>     | Body    |
| cg11243283 | 10 | 109,910,629 | 0.005128 | -0.282 | -0.195 |  |  |  |                  |         |
| cg05653329 | 1  | 21,042,988  | 3.98E-06 | -0.282 | -0.264 |  |  |  | <i>KIF17</i>     | Body    |
| cg27390496 | 19 | 51,357,367  | 3.31E-07 | -0.282 | -0.188 |  |  |  | <i>KLK3</i>      | TSS1500 |
| cg08358803 | 5  | 170,288,742 | 3.39E-07 | -0.282 | -0.301 |  |  |  | <i>RANBP17</i>   | TSS1500 |

|            |    |             |          |        |        |  |     |  |                     |         |
|------------|----|-------------|----------|--------|--------|--|-----|--|---------------------|---------|
| cg08417719 | 11 | 123,814,620 | 0.006711 | -0.282 | -0.251 |  |     |  | <i>OR6T1</i>        | TSS200  |
| cg24734254 | 1  | 14,753,722  | 1.63E-09 | -0.282 | -0.303 |  |     |  |                     |         |
| cg03102663 | 4  | 180,998,204 | 2.16E-05 | -0.282 | -0.265 |  |     |  |                     |         |
| cg22812280 | 11 | 5,173,605   | 0.000653 | -0.282 | -0.256 |  |     |  | <i>OR52A1</i>       | TSS200  |
| cg18788313 | 1  | 35,391,769  | 0.000226 | -0.282 | -0.246 |  |     |  |                     |         |
| cg00033909 | 7  | 9,674,902   | 1.94E-12 | -0.282 | -0.274 |  |     |  | <i>PER4</i>         | Body    |
| cg11294620 | 4  | 157,119,935 | 0.008742 | -0.282 | -0.218 |  |     |  |                     |         |
| cg09386771 | 16 | 1,730,594   | 0.001529 | -0.282 | -0.291 |  |     |  | <i>HN1L</i>         | Body    |
| cg08587313 | 8  | 130,215,373 | 0.008569 | -0.282 | -0.286 |  |     |  |                     |         |
| cg09487985 | 12 | 34,484,805  | 5.12E-05 | -0.282 | -0.243 |  |     |  |                     |         |
| cg19757631 | 1  | 11,118,889  | 1.56E-07 | -0.282 | -0.278 |  |     |  | <i>SRM</i>          | Body    |
| cg11823729 | 6  | 55,190,909  | 0.000247 | -0.282 | -0.209 |  |     |  | <i>GFRAL</i>        | TSS1500 |
| cg01638225 | 4  | 1,202,930   | 4.24E-15 | -0.282 | -0.254 |  |     |  | <i>LOC100130872</i> | TSS200  |
| cg06697455 | 5  | 27,039,965  | 1.04E-12 | -0.282 | -0.276 |  |     |  | <i>CDH9</i>         | TSS1500 |
| cg27394794 | 10 | 52,600,370  | 0.000322 | -0.282 | -0.199 |  |     |  | <i>A1CF</i>         | Body    |
| cg23355636 | 17 | 80,045,966  | 0.002732 | -0.282 | -0.172 |  |     |  | <i>FASN</i>         | Body    |
| cg25391692 | 4  | 100,495,869 | 1.16E-05 | -0.282 | -0.267 |  |     |  | <i>MTTP</i>         | 5'UTR   |
| cg23846114 | X  | 150,867,161 | 0.000613 | -0.282 | -0.191 |  |     |  | <i>PRRG3</i>        | 5'UTR   |
| cg04499646 | 6  | 133,529,701 | 0.008068 | -0.282 | -0.280 |  |     |  |                     |         |
| cg00119186 | 1  | 158,670,124 | 0.014264 | -0.282 | -0.172 |  |     |  | <i>OR6K2</i>        | 1stExon |
| cg25332238 | 2  | 70,122,333  | 0.00351  | -0.282 | -0.324 |  |     |  | <i>SNRNP27</i>      | Body    |
| cg05042749 | 11 | 50,129,456  | 0.045252 | -0.282 | -0.182 |  |     |  |                     |         |
| cg11943883 | 12 | 108,792,983 | 4.38E-05 | -0.282 | -0.272 |  |     |  |                     |         |
| cg24462453 | 11 | 55,644,825  | 0.000622 | -0.282 | -0.179 |  |     |  |                     |         |
| cg27133711 | 8  | 32,290,932  | 0.003334 | -0.282 | -0.269 |  | Yes |  | <i>NRG1</i>         | Body    |
| cg16018995 | 11 | 124,387,366 | 0.01781  | -0.282 | -0.214 |  |     |  |                     |         |
| cg20738733 | 19 | 3,983,041   | 1.06E-05 | -0.282 | -0.235 |  |     |  | <i>EEF2</i>         | Body    |
| cg21028703 | 15 | 22,541,305  | 7.01E-07 | -0.282 | -0.276 |  |     |  |                     |         |
| cg02922689 | 3  | 67,047,651  | 1.08E-05 | -0.282 | -0.305 |  |     |  | <i>KBTBD8</i>       | TSS1500 |
| cg17835455 | 12 | 84,464,130  | 0.00319  | -0.282 | -0.236 |  |     |  |                     |         |
| cg23375617 | 10 | 54,299,632  | 0.000113 | -0.282 | -0.190 |  |     |  |                     |         |
| cg18519834 | 20 | 60,303,394  | 4.15E-05 | -0.282 | -0.212 |  |     |  | <i>CDH4</i>         | Body    |
| cg00500221 | 1  | 2,915,875   | 0.002069 | -0.282 | -0.184 |  |     |  |                     |         |
| cg05787063 | 10 | 6,740,633   | 0.007467 | -0.282 | -0.240 |  |     |  |                     |         |

|            |    |             |          |        |        |            |        |  |                 |         |
|------------|----|-------------|----------|--------|--------|------------|--------|--|-----------------|---------|
| cg22154859 | 20 | 52,823,177  | 1.89E-05 | -0.282 | -0.224 |            |        |  | <i>PFDN4</i>    | TSS1500 |
| cg12404181 | 10 | 5,688,515   | 0.000177 | -0.282 | -0.292 |            |        |  | <i>ASB13</i>    | Body    |
| cg20982011 | 11 | 1,950,657   | 5.08E-05 | -0.282 | -0.198 |            |        |  | <i>TNNT3</i>    | Body    |
| cg19876302 | 10 | 123,494,737 | 6.52E-07 | -0.282 | -0.223 |            |        |  |                 |         |
| cg03952361 | 12 | 132,870,378 | 1.17E-05 | -0.283 | -0.180 |            |        |  | <i>GALNT9</i>   | Body    |
| cg05810731 | 13 | 91,049,886  | 3.91E-05 | -0.283 | -0.217 |            |        |  |                 |         |
| cg21374754 | 3  | 42,452,862  | 4.56E-09 | -0.283 | -0.263 |            |        |  | <i>LYZL4</i>    | TSS1500 |
| cg19370043 | 1  | 170,698,507 | 0.001756 | -0.283 | -0.181 |            |        |  | <i>PRRX1</i>    | Body    |
| cg26852625 | 8  | 2,885,627   | 0.003777 | -0.283 | -0.212 |            |        |  | <i>CSMD1</i>    | Body    |
| cg00790835 | 14 | 73,029,443  | 0.015507 | -0.283 | -0.329 |            |        |  | <i>RGS6</i>     | 3'UTR   |
| cg10656204 | 12 | 127,221,416 | 3.5E-08  | -0.283 | -0.280 |            |        |  |                 |         |
| cg15047223 | 12 | 8,687,513   | 8.94E-08 | -0.283 | -0.270 |            |        |  | <i>CLEC4E</i>   | Body    |
| cg03295542 | 8  | 89,777,219  | 2.49E-12 | -0.283 | -0.260 |            |        |  |                 |         |
| cg27436118 | 16 | 4,729,905   | 6.13E-10 | -0.283 | -0.253 |            |        |  | <i>MGRN1</i>    | Body    |
| cg04481779 | 6  | 137,366,125 | 1.13E-07 | -0.283 | -0.248 | 0.00177822 | -0.045 |  | <i>IL20RA</i>   | 1stExon |
| cg11735242 | 1  | 4,644,030   | 0.009713 | -0.283 | -0.213 |            |        |  |                 |         |
| cg01203136 | 2  | 241,922,076 | 7.68E-06 | -0.283 | -0.213 |            |        |  |                 |         |
| cg21385480 | 3  | 66,454,763  | 5.09E-10 | -0.283 | -0.284 |            |        |  | <i>LRIG1</i>    | Body    |
| cg25389863 | 8  | 130,492,175 | 0.003203 | -0.283 | -0.278 |            |        |  |                 |         |
| cg17678867 | 6  | 152,780,496 | 0.005191 | -0.283 | -0.184 |            |        |  | <i>SYNE1</i>    | Body    |
| cg13029400 | 3  | 141,087,190 | 1.38E-10 | -0.283 | -0.244 |            |        |  | <i>ZBTB38</i>   | 5'UTR   |
| cg11056234 | 2  | 53,004,359  | 8.56E-06 | -0.283 | -0.261 |            |        |  |                 |         |
| cg00117914 | 22 | 50,479,197  | 1.93E-08 | -0.283 | -0.269 |            |        |  | <i>TLL8</i>     | Body    |
| cg26030804 | 11 | 794,764     | 6.4E-07  | -0.283 | -0.273 |            |        |  | <i>SLC25A22</i> | Body    |
| cg04166913 | 6  | 32,945,336  | 8.88E-13 | -0.283 | -0.320 |            |        |  | <i>BRD2</i>     | Body    |
| cg03391002 | 12 | 108,566,377 | 1.23E-07 | -0.283 | -0.239 |            |        |  | <i>WSCD2</i>    | 5'UTR   |
| cg07285983 | 1  | 174,844,490 | 5.9E-08  | -0.283 | -0.261 |            |        |  | <i>RABGAP1L</i> | Body    |
| cg09092344 | 5  | 121,317,684 | 8.45E-13 | -0.283 | -0.262 |            |        |  | <i>SRFBP1</i>   | Body    |
| cg11362049 | 11 | 131,971,356 | 0.000139 | -0.283 | -0.255 |            |        |  | <i>NTM</i>      | Body    |
| cg03856044 | 1  | 159,557,632 | 5.76E-07 | -0.283 | -0.264 |            |        |  | <i>APCS</i>     | 5'UTR   |
| cg18148375 | 2  | 1,926,535   | 1.69E-11 | -0.283 | -0.288 |            |        |  | <i>MYT1L</i>    | Body    |
| cg08782899 | 17 | 79,652,389  | 6.38E-08 | -0.283 | -0.201 |            |        |  | <i>ARL16</i>    | TSS1500 |
| cg01182430 | 18 | 75,680,550  | 0.004626 | -0.283 | -0.173 |            |        |  |                 |         |
| cg11164441 | 4  | 656,100     | 0.002409 | -0.283 | -0.155 |            |        |  | <i>PDE6B</i>    | Body    |

|            |    |             |          |        |        |          |        |     |                |         |
|------------|----|-------------|----------|--------|--------|----------|--------|-----|----------------|---------|
| cg12965553 | 7  | 26,403,802  | 4.75E-12 | -0.283 | -0.312 |          |        |     | <i>SNX10</i>   | Body    |
| cg12990308 | 2  | 91,936,175  | 2.59E-08 | -0.283 | -0.256 |          |        |     |                |         |
| cg22125989 | 11 | 125,744,082 | 0.0011   | -0.283 | -0.205 |          |        |     |                |         |
| cg02415992 | 16 | 10,102,278  | 5.64E-07 | -0.283 | -0.275 |          |        |     | <i>GRIN2A</i>  | Body    |
| cg10467038 | 16 | 10,344,904  | 0.011685 | -0.283 | -0.200 |          |        |     |                |         |
| cg04392615 | 4  | 61,611,159  | 0.010427 | -0.283 | -0.213 |          |        |     |                |         |
| cg18187729 | 8  | 133,117,493 | 0.000765 | -0.283 | -0.281 |          |        |     | <i>HHLA1</i>   | 1stExon |
| cg22691587 | 1  | 40,349,894  | 2.76E-11 | -0.283 | -0.273 |          |        |     | <i>TRIT1</i>   | TSS1500 |
| cg25618439 | 1  | 149,158,099 | 0.005239 | -0.283 | -0.250 |          |        |     |                |         |
| cg04451579 | 7  | 32,059,706  | 0.004321 | -0.283 | -0.195 |          |        |     | <i>PDE1C</i>   | Body    |
| cg14944696 | 3  | 115,155,686 | 2.25E-06 | -0.283 | -0.278 |          |        |     |                |         |
| cg17136275 | 1  | 240,874,893 | 8.3E-05  | -0.283 | -0.239 |          |        |     |                |         |
| cg13440244 | X  | 52,896,774  | 0.007444 | -0.284 | -0.190 |          |        |     | <i>XAGE3</i>   | 5'UTR   |
| cg00998782 | 1  | 152,815,459 | 0.008473 | -0.284 | -0.195 |          |        |     | <i>LCE6A</i>   | 1stExon |
| cg06836656 | 1  | 2,876,347   | 0.004306 | -0.284 | -0.126 |          |        |     |                |         |
| cg19375492 | 19 | 22,441,140  | 6.23E-06 | -0.284 | -0.262 |          |        |     |                |         |
| cg25859489 | 11 | 103,908,787 | 1.94E-06 | -0.284 | -0.214 |          |        |     | <i>PDGFD</i>   | Body    |
| cg10962805 | 2  | 125,672,110 | 8.79E-10 | -0.284 | -0.298 |          |        |     | <i>CNTNAP5</i> | 3'UTR   |
| cg13499324 | 9  | 3,441,530   | 2.6E-12  | -0.284 | -0.277 |          |        |     | <i>RFX3</i>    | 5'UTR   |
| cg19995049 | 8  | 99,059,026  | 9.44E-06 | -0.284 | -0.282 |          |        |     | <i>RPL30</i>   | TSS1500 |
| cg03954794 | 1  | 215,035,489 | 0.000734 | -0.284 | -0.307 |          |        |     |                |         |
| cg18614139 | 14 | 83,692,140  | 1.2E-06  | -0.284 | -0.271 |          |        |     |                |         |
| cg08586216 | 6  | 35,612,351  | 8.51E-06 | -0.284 | -0.218 |          |        |     | <i>FKBP5</i>   | 5'UTR   |
| cg23253752 | 15 | 44,068,246  | 0.000573 | -0.284 | -0.256 |          |        |     | <i>ELL3</i>    | Body    |
| cg00367424 | 11 | 1,673,835   | 5.77E-18 | -0.284 | -0.290 |          |        |     | <i>HCCA2</i>   | Body    |
| cg01999051 | 6  | 166,797,738 | 1.45E-06 | -0.284 | -0.235 |          |        |     | <i>BRP44L</i>  | TSS1500 |
| cg21610556 | 4  | 181,452,599 | 0.003682 | -0.284 | -0.181 |          |        |     |                |         |
| cg03326307 | 3  | 44,751,272  | 5.03E-09 | -0.284 | -0.230 |          |        | Yes |                |         |
| cg13087761 | 7  | 5,645,778   | 0.00864  | -0.284 | -0.148 |          |        |     | <i>FSCN1</i>   | 3'UTR   |
| cg15842898 | 4  | 17,189,023  | 0.000206 | -0.284 | -0.193 |          |        |     |                |         |
| cg23741006 | 11 | 59,634,191  | 6.41E-15 | -0.284 | -0.278 |          |        |     | <i>TCN1</i>    | TSS200  |
| cg11911951 | 16 | 1,430,216   | 2.62E-07 | -0.284 | -0.353 | 3.07E-25 | -0.172 |     | <i>UNKL</i>    | TSS1500 |
| cg02893344 | 16 | 85,517,269  | 0.001716 | -0.284 | -0.241 |          |        |     |                |         |
| cg26607528 | 2  | 69,668,304  | 3.18E-09 | -0.284 | -0.294 |          |        |     |                |         |

|            |    |             |          |        |        |          |        |     |                |         |
|------------|----|-------------|----------|--------|--------|----------|--------|-----|----------------|---------|
| cg12352399 | 3  | 25,689,774  | 1.26E-15 | -0.284 | -0.260 |          |        |     | <i>TOP2B</i>   | Body    |
| cg09171368 | 12 | 38,544,936  | 0.000275 | -0.284 | -0.203 |          |        |     |                |         |
| cg14321373 | 8  | 140,627,494 | 0.001103 | -0.284 | -0.215 |          |        |     | <i>KCNK9</i>   | 3'UTR   |
| cg18332838 | 8  | 126,698,738 | 3.15E-05 | -0.284 | -0.193 |          |        |     |                |         |
| cg23159250 | 11 | 134,783,504 | 0.001165 | -0.284 | -0.224 |          |        |     |                |         |
| cg03803009 | 17 | 72,363,634  | 3.59E-05 | -0.284 | -0.236 | 1.51E-16 | -0.145 |     | <i>GPR142</i>  | TSS200  |
| cg15584084 | 4  | 164,337,795 | 0.003177 | -0.284 | -0.222 |          |        |     |                |         |
| cg08581004 | 16 | 1,487,018   | 5.07E-10 | -0.284 | -0.249 |          |        |     | <i>CCDC154</i> | Body    |
| cg26009029 | 19 | 10,762,098  | 1.85E-15 | -0.284 | -0.278 |          |        |     |                |         |
| cg09234465 | 17 | 43,664,173  | 1.36E-16 | -0.284 | -0.252 |          |        |     |                |         |
| cg06921176 | 11 | 7,819,960   | 0.001971 | -0.284 | -0.285 |          |        |     | <i>OR5P2</i>   | TSS1500 |
| cg18159533 | 12 | 133,357,242 | 0.003869 | -0.284 | -0.231 |          |        |     | <i>GOLGA3</i>  | Body    |
| cg26362078 | 5  | 27,036,352  | 0.000483 | -0.284 | -0.216 |          |        |     | <i>CDH9</i>    | 5'UTR   |
| cg06826710 | 1  | 246,939,249 | 4.74E-08 | -0.284 | -0.264 |          |        |     |                |         |
| cg07885141 | 13 | 97,720,348  | 3.12E-08 | -0.284 | -0.234 |          |        |     |                |         |
| cg16176378 | 8  | 34,843,233  | 1.75E-07 | -0.284 | -0.255 |          |        |     |                |         |
| cg01400480 | 11 | 12,252,002  | 2.19E-05 | -0.284 | -0.306 |          |        |     | <i>MICAL2</i>  | Body    |
| cg04852776 | 8  | 72,843,902  | 0.00139  | -0.284 | -0.223 |          |        |     |                |         |
| cg10318039 | 7  | 84,671,308  | 2.02E-12 | -0.284 | -0.300 |          |        |     | <i>SEMA3D</i>  | Body    |
| cg01601926 | 16 | 8,986,308   | 2.62E-14 | -0.284 | -0.262 |          |        |     | <i>USP7</i>    | 3'UTR   |
| cg04141767 | X  | 147,800,037 | 0.003835 | -0.285 | -0.237 |          |        |     | <i>AFF2</i>    | Body    |
| cg00173005 | 1  | 158,258,366 | 1.1E-06  | -0.285 | -0.303 |          |        |     | <i>CD1C</i>    | TSS1500 |
| cg04870949 | 13 | 114,109,857 | 0.012241 | -0.285 | -0.371 |          |        |     |                |         |
| cg20502080 | 14 | 73,137,874  | 0.000375 | -0.285 | -0.299 |          |        |     | <i>DPF3</i>    | Body    |
| cg26421805 | 1  | 157,938,690 | 0.000193 | -0.285 | -0.233 |          |        |     |                |         |
| cg13322063 | 5  | 83,215,335  | 8.98E-05 | -0.285 | -0.258 |          |        |     |                |         |
| cg00061811 | 6  | 170,475,845 | 8.72E-09 | -0.285 | -0.210 |          |        |     |                |         |
| cg21157873 | 1  | 151,486,487 | 1.33E-07 | -0.285 | -0.258 |          |        |     | <i>CGN</i>     | 5'UTR   |
| cg06061536 | 3  | 41,405,770  | 3.75E-24 | -0.285 | -0.272 |          |        |     | <i>ULK4</i>    | Body    |
| cg24444631 | 6  | 29,636,366  | 4.56E-09 | -0.285 | -0.268 |          |        |     | <i>MOG</i>     | 3'UTR   |
| cg12791065 | 15 | 101,419,269 | 0.001286 | -0.285 | -0.223 |          |        |     | <i>ALDH1A3</i> | TSS1500 |
| cg23404737 | 11 | 123,892,725 | 0.000903 | -0.285 | -0.252 |          |        | Yes | <i>OR10G9</i>  | TSS1500 |
| cg09959790 | 13 | 59,616,937  | 2.34E-05 | -0.285 | -0.227 |          |        |     |                |         |
| cg22142212 | X  | 151,562,912 | 0.000446 | -0.285 | -0.237 |          |        |     | <i>GABRA3</i>  | 5'UTR   |



|            |    |             |          |        |        |          |        |  |                  |         |
|------------|----|-------------|----------|--------|--------|----------|--------|--|------------------|---------|
| cg06612945 | 12 | 101,671,552 | 7.13E-08 | -0.285 | -0.270 |          |        |  |                  |         |
| cg16908740 | 1  | 152,118,444 | 1.49E-11 | -0.285 | -0.259 |          |        |  |                  |         |
| cg17626801 | 11 | 56,020,533  | 0.003286 | -0.285 | -0.222 |          |        |  | <i>OR5T3</i>     | 1stExon |
| cg22433418 | 8  | 113,702,707 | 8.56E-08 | -0.285 | -0.271 |          |        |  | <i>CSMD3</i>     | Body    |
| cg24547910 | 4  | 100,632,951 | 8.98E-12 | -0.285 | -0.289 |          |        |  |                  |         |
| cg09242288 | 4  | 34,312,045  | 3.3E-06  | -0.285 | -0.264 |          |        |  |                  |         |
| cg01584348 | 15 | 98,417,825  | 0.011351 | -0.285 | -0.228 |          |        |  | <i>LOC91948</i>  | TSS200  |
| cg02480077 | 8  | 86,934,762  | 0.001579 | -0.285 | -0.273 |          |        |  |                  |         |
| cg04138756 | 1  | 152,973,849 | 0.004001 | -0.285 | -0.264 | 4.51E-21 | -0.211 |  | <i>SPRR3</i>     | TSS1500 |
| cg00043792 | 10 | 26,219,304  | 3.93E-07 | -0.285 | -0.304 |          |        |  |                  |         |
| cg22363368 | 2  | 59,126,860  | 0.001355 | -0.285 | -0.255 |          |        |  |                  |         |
| cg24832498 | 11 | 5,528,669   | 0.000683 | -0.285 | -0.282 |          |        |  | <i>UBQLN3</i>    | 3'UTR   |
| cg00978051 | 16 | 59,786,279  | 3.9E-05  | -0.285 | -0.223 |          |        |  |                  |         |
| cg20085588 | 10 | 81,316,188  | 4.53E-10 | -0.285 | -0.252 |          |        |  | <i>SFTPA2</i>    | 3'UTR   |
| cg27321942 | 19 | 49,993,217  | 5.9E-27  | -0.285 | -0.270 |          |        |  | <i>RPL13AP5</i>  | Body    |
| cg03098981 | 21 | 37,021,315  | 6.29E-05 | -0.285 | -0.317 |          |        |  |                  |         |
| cg12051956 | 12 | 6,807,082   | 2.22E-05 | -0.285 | -0.187 |          |        |  | <i>C12orf53</i>  | Body    |
| cg03693842 | X  | 151,620,975 | 0.004034 | -0.285 | -0.184 |          |        |  | <i>GABRA3</i>    | TSS1500 |
| cg18480127 | 14 | 99,181,995  | 0.000314 | -0.285 | -0.215 |          |        |  | <i>C14orf177</i> | 5'UTR   |
| cg25668093 | 15 | 95,399,279  | 0.002013 | -0.285 | -0.214 |          |        |  |                  |         |
| cg07588006 | 4  | 175,752,696 | 0.002504 | -0.285 | -0.230 |          |        |  |                  |         |
| cg11404502 | 10 | 133,376,790 | 0.031965 | -0.285 | -0.148 |          |        |  |                  |         |
| cg18524788 | 7  | 25,890,808  | 0.007325 | -0.285 | -0.374 |          |        |  |                  |         |
| cg25345746 | 4  | 172,032,402 | 1.92E-11 | -0.285 | -0.278 |          |        |  |                  |         |
| cg17522727 | 11 | 794,867     | 1.04E-06 | -0.285 | -0.264 |          |        |  | <i>SLC25A22</i>  | Body    |
| cg05475091 | 4  | 48,644,525  | 8.69E-10 | -0.285 | -0.237 |          |        |  | <i>FRYL</i>      | 5'UTR   |
| cg25611369 | 11 | 69,460,638  | 3.56E-09 | -0.285 | -0.260 |          |        |  | <i>CCND1</i>     | Body    |
| cg13715798 | 20 | 37,228,520  | 1.6E-15  | -0.285 | -0.303 |          |        |  |                  |         |
| cg08902243 | 19 | 1,440,293   | 2.8E-09  | -0.286 | -0.289 |          |        |  | <i>RPS15</i>     | Body    |
| cg01074318 | 3  | 191,823,430 | 1.14E-06 | -0.286 | -0.230 |          |        |  |                  |         |
| cg07424785 | 1  | 3,204,078   | 8.68E-07 | -0.286 | -0.218 |          |        |  | <i>PRDM16</i>    | Body    |
| cg01093088 | 1  | 153,322,488 | 3.61E-07 | -0.286 | -0.248 |          |        |  | <i>PGLYRP4</i>   | TSS1500 |
| cg08514311 | 16 | 51,416,829  | 0.006053 | -0.286 | -0.301 |          |        |  |                  |         |
| cg15602735 | X  | 141,293,333 | 0.001083 | -0.286 | -0.184 | 7.04E-11 | -0.161 |  | <i>MAGEC2</i>    | TSS1500 |

|            |    |             |          |        |        |         |        |     |                  |         |
|------------|----|-------------|----------|--------|--------|---------|--------|-----|------------------|---------|
| cg16324934 | 14 | 86,088,580  | 0.001214 | -0.286 | -0.219 |         |        |     | <i>FLRT2</i>     | Body    |
| cg24338745 | 10 | 9,639,590   | 1.47E-07 | -0.286 | -0.252 |         |        |     |                  |         |
| cg11518938 | 1  | 159,138,217 | 8.85E-08 | -0.286 | -0.291 |         |        |     |                  |         |
| cg14187877 | 4  | 16,679,554  | 0.001296 | -0.286 | -0.308 |         |        |     | <i>LDB2</i>      | Body    |
| cg17793354 | 2  | 237,487,801 | 4.5E-06  | -0.286 | -0.231 |         |        |     | <i>CXCR7</i>     | 5'UTR   |
| cg01767053 | 16 | 85,678,884  | 5.35E-07 | -0.286 | -0.275 |         |        |     | <i>KIAA0182</i>  | 5'UTR   |
| cg07773582 | 16 | 4,845,285   | 0.002693 | -0.286 | -0.252 |         |        |     | <i>LOC440335</i> | TSS200  |
| cg14084826 | 1  | 205,632,101 | 6.23E-14 | -0.286 | -0.263 |         |        |     | <i>SLC45A3</i>   | Body    |
| cg06675705 | 3  | 100,560,402 | 0.001563 | -0.286 | -0.242 |         |        |     | <i>ABI3BP</i>    | Body    |
| cg24074153 | 14 | 47,572,921  | 3.95E-05 | -0.286 | -0.267 |         |        |     | <i>MDGA2</i>     | Body    |
| cg23950788 | 7  | 31,728,475  | 0.003942 | -0.286 | -0.230 |         |        |     | <i>C7orf16</i>   | 5'UTR   |
| cg05365469 | 1  | 193,024,276 | 1.11E-12 | -0.286 | -0.284 |         |        |     | <i>UCHL5</i>     | Body    |
| cg07720646 | 15 | 42,447,840  | 1.97E-05 | -0.286 | -0.220 |         |        |     | <i>PLA2G4F</i>   | Body    |
| cg14608581 | 2  | 70,122,240  | 5.03E-06 | -0.286 | -0.312 |         |        |     | <i>SNRNP27</i>   | Body    |
| cg22943388 | 12 | 132,076,630 | 0.001623 | -0.286 | -0.180 |         |        |     |                  |         |
| cg19897017 | 7  | 2,163,380   | 0.007731 | -0.286 | -0.361 |         |        |     | <i>MAD1L1</i>    | Body    |
| cg17827477 | 22 | 49,487,343  | 0.000364 | -0.286 | -0.186 |         |        |     |                  |         |
| cg02830467 | 6  | 153,018,721 | 1.9E-06  | -0.286 | -0.222 | 2.3E-10 | -0.226 |     | <i>MYCT1</i>     | TSS1500 |
| cg12219434 | 3  | 80,820,415  | 4.25E-11 | -0.286 | -0.281 |         |        |     |                  |         |
| cg25742394 | 3  | 169,754,870 | 2.08E-09 | -0.286 | -0.293 |         |        | Yes | <i>GPR160</i>    | TSS1500 |
| cg00564061 | 6  | 117,001,170 | 3.55E-12 | -0.286 | -0.278 |         |        |     | <i>KPNA5</i>     | TSS1500 |
| cg10271112 | 10 | 57,394,513  | 4.25E-06 | -0.286 | -0.263 |         |        |     |                  |         |
| cg22682646 | 12 | 114,216,448 | 8.71E-05 | -0.286 | -0.241 |         |        |     |                  |         |
| cg17134153 | 1  | 157,670,328 | 0.000703 | -0.286 | -0.325 |         |        |     | <i>FCRL3</i>     | 5'UTR   |
| cg07494300 | 13 | 102,051,019 | 1.86E-05 | -0.286 | -0.267 |         |        |     | <i>NALCN</i>     | Body    |
| cg14309307 | 6  | 105,750,523 | 3.63E-14 | -0.286 | -0.295 |         |        |     | <i>PREP</i>      | Body    |
| cg17296650 | 11 | 123,909,325 | 2.04E-05 | -0.286 | -0.255 |         |        |     | <i>OR10G7</i>    | 1stExon |
| cg15658344 | 12 | 50,720,139  | 2.45E-10 | -0.286 | -0.254 |         |        |     |                  |         |
| cg09091657 | 8  | 41,004,167  | 0.000917 | -0.286 | -0.148 |         |        | Yes |                  |         |
| cg20810046 | 2  | 242,065,812 | 5.19E-10 | -0.286 | -0.272 |         |        |     | <i>PASK</i>      | Body    |
| cg00026141 | 3  | 191,579,258 | 0.004701 | -0.287 | -0.254 |         |        |     |                  |         |
| cg04809380 | 16 | 1,244,525   | 4.54E-05 | -0.287 | -0.304 |         |        |     | <i>CACNA1H</i>   | Body    |
| cg14851701 | 12 | 131,831,956 | 0.000563 | -0.287 | -0.220 |         |        |     |                  |         |
| cg09168797 | 5  | 125,800,797 | 5.97E-08 | -0.287 | -0.296 |         |        | Yes | <i>GRAMD3</i>    | Body    |

|            |    |             |          |        |        |          |        |     |                |         |
|------------|----|-------------|----------|--------|--------|----------|--------|-----|----------------|---------|
| cg08170637 | 17 | 79,988,088  | 0.000122 | -0.287 | -0.205 |          |        |     | <i>RAC3</i>    | TSS1500 |
| cg18858676 | 11 | 123,899,655 | 1.41E-06 | -0.287 | -0.278 |          |        |     | <i>OR10G8</i>  | TSS1500 |
| cg03517837 | 3  | 193,106,359 | 0.003842 | -0.287 | -0.203 |          |        |     |                |         |
| cg25463742 | 1  | 10,839,574  | 0.000142 | -0.287 | -0.285 |          |        |     | <i>CASZ1</i>   | 5'UTR   |
| cg09832443 | 7  | 28,612,680  | 6.85E-14 | -0.287 | -0.282 |          |        |     | <i>CREB5</i>   | Body    |
| cg21078966 | 18 | 68,699,782  | 0.00078  | -0.287 | -0.182 |          |        |     |                |         |
| cg13320436 | 8  | 55,138,014  | 5.15E-05 | -0.287 | -0.318 |          |        |     |                |         |
| cg06118609 | 11 | 7,982,706   | 3.89E-06 | -0.287 | -0.259 |          |        |     | <i>NLRP10</i>  | Body    |
| cg04176452 | 14 | 71,131,956  | 4.3E-05  | -0.287 | -0.273 |          |        |     | <i>TTC9</i>    | Body    |
| cg01564772 | 16 | 8,995,896   | 0.002331 | -0.287 | -0.268 |          |        |     | <i>USP7</i>    | Body    |
| cg01847754 | X  | 144,909,347 | 1.98E-05 | -0.287 | -0.274 |          |        |     | <i>CXorf1</i>  | 1stExon |
| cg21570843 | 1  | 2,789,896   | 4.15E-05 | -0.287 | -0.252 |          |        |     |                |         |
| cg19787000 | 12 | 127,220,652 | 0.000616 | -0.287 | -0.252 |          |        |     |                |         |
| cg21336434 | 7  | 54,271,282  | 1.16E-08 | -0.287 | -0.274 |          |        |     | <i>HPVC1</i>   | TSS1500 |
| cg18119407 | 2  | 201,980,504 | 1.85E-18 | -0.287 | -0.286 | 3.55E-30 | -0.206 |     | <i>CFLAR</i>   | TSS1500 |
| cg21613549 | 13 | 111,936,071 | 0.004267 | -0.287 | -0.288 |          |        |     | <i>ARHGEF7</i> | Body    |
| cg14997413 | 7  | 51,384,937  | 6.84E-12 | -0.287 | -0.269 |          |        |     | <i>COBL</i>    | TSS1500 |
| cg20734219 | 5  | 146,453,021 | 7.77E-09 | -0.287 | -0.240 |          |        |     | <i>PPP2R2B</i> | 5'UTR   |
| cg23875854 | 10 | 6,531,368   | 0.001163 | -0.287 | -0.228 |          |        |     | <i>PRKCQ</i>   | Body    |
| cg27053493 | 1  | 29,823,421  | 7.88E-05 | -0.287 | -0.220 |          |        |     |                |         |
| cg19938167 | 1  | 199,052,402 | 0.000104 | -0.287 | -0.257 |          |        |     |                |         |
| cg24385652 | 10 | 50,329,828  | 1.42E-06 | -0.287 | -0.238 |          |        |     |                |         |
| cg25708982 | 13 | 112,895,431 | 0.001286 | -0.287 | -0.175 |          |        |     |                |         |
| cg05863862 | 6  | 29,649,807  | 9.09E-05 | -0.287 | -0.231 |          |        |     |                |         |
| cg16678467 | 16 | 24,265,847  | 0.004328 | -0.287 | -0.311 |          |        |     | <i>CACNG3</i>  | TSS1500 |
| cg12543219 | 10 | 135,016,451 | 0.010289 | -0.287 | -0.141 |          |        |     | <i>KNDC1</i>   | Body    |
| cg08339159 | 4  | 155,507,878 | 0.003984 | -0.287 | -0.159 |          |        |     | <i>FGA</i>     | Body    |
| cg07956247 | 1  | 3,148,005   | 0.017967 | -0.287 | -0.070 |          |        |     | <i>PRDM16</i>  | Body    |
| cg11724511 | 11 | 1,455,468   | 5.23E-11 | -0.287 | -0.267 |          |        |     | <i>BRSK2</i>   | Body    |
| cg03004417 | 11 | 61,357,547  | 2.61E-09 | -0.287 | -0.268 |          |        |     |                |         |
| cg19920029 | 14 | 47,411,755  | 2.49E-05 | -0.287 | -0.307 |          |        |     | <i>MDGA2</i>   | Body    |
| cg14797580 | 17 | 80,053,635  | 1.02E-14 | -0.287 | -0.284 |          |        | Yes | <i>FASN</i>    | Body    |
| cg08519008 | 11 | 123,815,202 | 2.47E-05 | -0.287 | -0.289 |          |        |     | <i>OR6T1</i>   | TSS1500 |
| cg02320356 | 8  | 127,237,106 | 0.003687 | -0.287 | -0.272 |          |        |     |                |         |

|            |    |             |          |        |        |          |        |     |                     |         |
|------------|----|-------------|----------|--------|--------|----------|--------|-----|---------------------|---------|
| cg18309674 | 14 | 105,495,862 | 4.19E-05 | -0.287 | -0.317 |          |        |     |                     |         |
| cg18790787 | 2  | 118,170,690 | 0.000125 | -0.287 | -0.272 |          |        |     |                     |         |
| cg14569380 | 9  | 137,036,533 | 8.37E-05 | -0.287 | -0.257 |          |        |     |                     |         |
| cg10846614 | X  | 150,902,317 | 6.18E-09 | -0.287 | -0.295 |          |        |     | <i>CNGA2</i>        | TSS1500 |
| cg11124142 | 10 | 38,463,685  | 0.000108 | -0.287 | -0.274 |          |        |     | <i>LOC100129055</i> | TSS1500 |
| cg15244965 | 8  | 3,429,480   | 0.015769 | -0.287 | -0.271 |          |        |     | <i>CSMD1</i>        | Body    |
| cg19852204 | 5  | 3,932,233   | 0.000111 | -0.287 | -0.265 |          |        | Yes |                     |         |
| cg05272165 | 6  | 156,103,037 | 0.021449 | -0.288 | -0.217 |          |        |     |                     |         |
| cg10054857 | 18 | 61,816,543  | 0.003689 | -0.288 | -0.234 | 5.88E-09 | -0.210 |     | <i>C18orf20</i>     | TSS1500 |
| cg01346596 | 10 | 11,868,146  | 0.018479 | -0.288 | -0.186 |          |        |     | <i>C10orf47</i>     | 5'UTR   |
| cg07947016 | 19 | 51,375,893  | 2.35E-06 | -0.288 | -0.225 |          |        | Yes | <i>KLK2</i>         | TSS1500 |
| cg10888111 | 2  | 1,637,068   | 0.006425 | -0.288 | -0.115 |          |        |     | <i>PXDN</i>         | 3'UTR   |
| cg27179710 | 4  | 189,700,628 | 5.02E-11 | -0.288 | -0.287 |          |        |     |                     |         |
| cg18013056 | 8  | 47,174,057  | 0.001691 | -0.288 | -0.257 |          |        |     |                     |         |
| cg23994025 | 11 | 103,608,623 | 3.76E-14 | -0.288 | -0.285 |          |        |     |                     |         |
| cg19718662 | 7  | 53,811,402  | 1.22E-06 | -0.288 | -0.287 |          |        |     |                     |         |
| cg07991139 | 11 | 122,191,244 | 3.3E-09  | -0.288 | -0.247 |          |        |     |                     |         |
| cg09081266 | 6  | 29,365,287  | 0.006052 | -0.288 | -0.263 |          |        |     | <i>OR12D2</i>       | 1stExon |
| cg14948825 | 4  | 178,138,573 | 1.03E-09 | -0.288 | -0.301 |          |        |     |                     |         |
| cg01421943 | 4  | 107,843,676 | 7.38E-05 | -0.288 | -0.242 |          |        |     | <i>DKK2</i>         | 3'UTR   |
| cg14740771 | 1  | 207,262,428 | 4.56E-09 | -0.288 | -0.250 |          |        |     | <i>C4BPB</i>        | 5'UTR   |
| cg26636590 | 4  | 46,911,374  | 0.00133  | -0.288 | -0.183 |          |        |     | <i>COX7B2</i>       | TSS200  |
| cg26733975 | 7  | 56,551,640  | 0.000807 | -0.288 | -0.245 |          |        |     |                     |         |
| cg24537237 | 11 | 1,254,204   | 3.51E-15 | -0.288 | -0.274 |          |        |     | <i>MUC5B</i>        | Body    |
| cg11155992 | 13 | 19,142,361  | 0.000198 | -0.288 | -0.236 |          |        |     |                     |         |
| cg18146221 | 2  | 182,361,913 | 6.11E-12 | -0.288 | -0.251 |          |        |     | <i>ITGA4</i>        | Body    |
| cg20094831 | 10 | 44,699,412  | 0.000164 | -0.288 | -0.261 |          |        |     |                     |         |
| cg27417294 | 10 | 81,904,244  | 4.09E-11 | -0.288 | -0.218 |          |        |     | <i>PLAC9</i>        | Body    |
| cg20926939 | 4  | 17,030,288  | 1.92E-08 | -0.288 | -0.291 |          |        |     |                     |         |
| cg27265630 | 10 | 85,958,429  | 1.07E-14 | -0.288 | -0.264 |          |        |     | <i>PCDH21</i>       | Body    |
| cg06878426 | 6  | 166,666,287 | 8.78E-05 | -0.288 | -0.221 |          |        |     |                     |         |
| cg08832234 | 8  | 138,493,933 | 0.000116 | -0.288 | -0.251 |          |        | Yes |                     |         |
| cg22451632 | 1  | 157,075,626 | 1.47E-07 | -0.288 | -0.260 |          |        |     |                     |         |
| cg11820931 | 10 | 70,717,302  | 8.87E-06 | -0.288 | -0.303 |          |        |     | <i>DDX21</i>        | Body    |

|            |    |             |          |        |        |  |  |     |           |         |
|------------|----|-------------|----------|--------|--------|--|--|-----|-----------|---------|
| cg26196124 | 11 | 49,877,977  | 0.000675 | -0.288 | -0.252 |  |  |     |           |         |
| cg21425607 | 8  | 106,611,264 | 0.00846  | -0.288 | -0.290 |  |  |     | ZFPM2     | Body    |
| cg23413289 | 4  | 187,619,438 | 0.000184 | -0.288 | -0.329 |  |  |     | FAT1      | Body    |
| cg10910862 | 4  | 170,414,111 | 1.12E-07 | -0.288 | -0.228 |  |  |     | NEK1      | Body    |
| cg24119500 | 6  | 69,420,780  | 0.00014  | -0.288 | -0.320 |  |  |     | BAI3      | Body    |
| cg08450807 | 13 | 103,702,677 | 0.004655 | -0.288 | -0.309 |  |  |     | SLC10A2   | Body    |
| cg11791144 | 8  | 32,129,319  | 8.09E-06 | -0.288 | -0.282 |  |  |     | NRG1      | Body    |
| cg26939227 | 17 | 1,372,403   | 5.06E-07 | -0.288 | -0.230 |  |  |     | MYO1C     | Body    |
| cg04891688 | 3  | 99,113,136  | 0.002296 | -0.288 | -0.213 |  |  |     |           |         |
| cg05933997 | 16 | 86,735,122  | 7.37E-09 | -0.288 | -0.237 |  |  |     |           |         |
| cg11074070 | 2  | 80,557,293  | 0.000694 | -0.288 | -0.257 |  |  |     | CTNNA2    | Body    |
| cg23121887 | 13 | 112,901,907 | 0.005471 | -0.288 | -0.166 |  |  |     |           |         |
| cg12664951 | 10 | 117,817,567 | 0.026501 | -0.288 | -0.190 |  |  |     | GFRA1     | 3'UTR   |
| cg04350066 | 20 | 31,594,060  | 6.73E-07 | -0.288 | -0.318 |  |  |     | BPIL1     | TSS1500 |
| cg05261028 | 8  | 128,494,655 | 0.00038  | -0.288 | -0.161 |  |  |     | LOC727677 | TSS1500 |
| cg25363564 | 10 | 111,540,348 | 0.000436 | -0.288 | -0.296 |  |  |     |           |         |
| cg07018580 | 11 | 59,480,501  | 0.003723 | -0.288 | -0.259 |  |  |     | OR10V1    | 1stExon |
| cg04173852 | 17 | 66,292,375  | 0.000213 | -0.289 | -0.225 |  |  | Yes | ARSG      | 5'UTR   |
| cg22600832 | 15 | 89,746,837  | 0.001018 | -0.289 | -0.211 |  |  |     |           |         |
| cg10572188 | 3  | 113,213,220 | 3.18E-18 | -0.289 | -0.275 |  |  |     | CCDC52    | Body    |
| cg07275552 | 5  | 83,874,980  | 0.000704 | -0.289 | -0.230 |  |  |     |           |         |
| cg02347113 | 2  | 101,752,032 | 1.2E-07  | -0.289 | -0.253 |  |  |     | TBC1D8    | Body    |
| cg00084798 | 8  | 142,841,965 | 0.008912 | -0.289 | -0.169 |  |  |     |           |         |
| cg20818262 | 8  | 73,480,145  | 0.001957 | -0.289 | -0.187 |  |  |     | KCNB2     | Body    |
| cg26900781 | 4  | 47,038,032  | 0.00065  | -0.289 | -0.282 |  |  |     | GABRB1    | Body    |
| cg19207486 | 19 | 22,323,107  | 0.001011 | -0.289 | -0.244 |  |  |     |           |         |
| cg23255020 | 1  | 246,939,407 | 1.91E-09 | -0.289 | -0.285 |  |  |     |           |         |
| cg03706175 | 2  | 47,597,331  | 4.58E-13 | -0.289 | -0.297 |  |  |     | EPCAM     | Body    |
| cg10096929 | 1  | 156,261,403 | 1.2E-13  | -0.289 | -0.269 |  |  |     | TMEM79    | Body    |
| cg20480740 | 11 | 123,899,875 | 6.99E-05 | -0.289 | -0.224 |  |  |     | OR10G8    | TSS1500 |
| cg11501364 | 13 | 99,851,660  | 2.2E-12  | -0.289 | -0.285 |  |  |     | UBAC2     | TSS1500 |
| cg22369037 | 6  | 31,516,024  | 0.042509 | -0.289 | -0.353 |  |  |     | ATP6V1G2  | TSS1500 |
| cg02537612 | X  | 144,712,518 | 0.005125 | -0.289 | -0.206 |  |  |     |           |         |
| cg11585670 | 1  | 177,136,968 | 0.000117 | -0.289 | -0.281 |  |  |     |           |         |

|            |    |             |          |        |        |  |  |     |                  |         |
|------------|----|-------------|----------|--------|--------|--|--|-----|------------------|---------|
| cg23385248 | 15 | 93,579,332  | 3.77E-10 | -0.289 | -0.280 |  |  |     |                  |         |
| cg23542590 | 3  | 56,717,769  | 1.47E-05 | -0.289 | -0.301 |  |  |     | <i>C3orf63</i>   | TSS1500 |
| cg07096218 | 1  | 95,581,952  | 1.34E-11 | -0.289 | -0.258 |  |  |     | <i>TMEM56</i>    | TSS1500 |
| cg24023916 | 7  | 114,349,996 | 0.007688 | -0.289 | -0.268 |  |  |     |                  |         |
| cg01325552 | 4  | 187,025,420 | 0.000109 | -0.289 | -0.182 |  |  |     |                  |         |
| cg08613794 | 16 | 16,974,291  | 0.00593  | -0.289 | -0.158 |  |  |     |                  |         |
| cg22679813 | 7  | 154,068,736 | 0.046218 | -0.289 | -0.206 |  |  |     | <i>DPP6</i>      | Body    |
| cg20559403 | 10 | 134,940,595 | 0.015578 | -0.289 | -0.141 |  |  |     | <i>GPR123</i>    | Body    |
| cg16560627 | 11 | 7,985,226   | 0.001512 | -0.289 | -0.234 |  |  |     | <i>NLRP10</i>    | TSS200  |
| cg07570113 | 16 | 59,790,180  | 9.71E-07 | -0.289 | -0.274 |  |  |     | <i>LOC644649</i> | TSS1500 |
| cg10326726 | 10 | 51,549,505  | 3.67E-06 | -0.289 | -0.264 |  |  |     | <i>MSMB</i>      | TSS200  |
| cg21451653 | 12 | 34,551,994  | 0.0003   | -0.289 | -0.239 |  |  |     |                  |         |
| cg14075424 | 19 | 13,988,235  | 0.000442 | -0.289 | -0.280 |  |  |     | <i>NANOS3</i>    | 1stExon |
| cg17004353 | 11 | 3,073,441   | 0.00122  | -0.289 | -0.397 |  |  |     | <i>CARS</i>      | Body    |
| cg18585560 | 14 | 70,236,546  | 0.025288 | -0.289 | -0.262 |  |  |     | <i>SFRS5</i>     | Body    |
| cg02736228 | 1  | 204,346,643 | 0.000144 | -0.289 | -0.231 |  |  |     |                  |         |
| cg25092670 | 3  | 108,837,620 | 7.72E-09 | -0.289 | -0.235 |  |  |     | <i>MORC1</i>     | TSS1500 |
| cg02281970 | 19 | 1,271,307   | 1.01E-12 | -0.289 | -0.277 |  |  |     | <i>C19orf23</i>  | TSS1500 |
| cg25132662 | 1  | 218,537,543 | 5.24E-24 | -0.289 | -0.272 |  |  |     | <i>TGFB2</i>     | Body    |
| cg05905309 | 19 | 46,364,326  | 1.12E-08 | -0.290 | -0.254 |  |  |     | <i>SYMPK</i>     | 5'UTR   |
| cg00298919 | 16 | 86,421,796  | 0.00017  | -0.290 | -0.236 |  |  |     |                  |         |
| cg13156856 | 8  | 32,732,320  | 8.85E-05 | -0.290 | -0.254 |  |  |     |                  |         |
| cg10687219 | 11 | 68,174,286  | 2.25E-07 | -0.290 | -0.285 |  |  |     | <i>LRP5</i>      | Body    |
| cg20441894 | 3  | 108,476,163 | 0.002764 | -0.290 | -0.246 |  |  |     | <i>RETNLB</i>    | TSS200  |
| cg00887508 | 13 | 22,425,573  | 0.000146 | -0.290 | -0.269 |  |  |     |                  |         |
| cg08963360 | 5  | 4,644,421   | 0.006614 | -0.290 | -0.197 |  |  |     |                  |         |
| cg23919924 | 11 | 123,900,690 | 6.69E-14 | -0.290 | -0.267 |  |  |     | <i>OR10G8</i>    | 1stExon |
| cg04720283 | 11 | 103,914,796 | 6.3E-05  | -0.290 | -0.220 |  |  |     | <i>PDGFD</i>     | Body    |
| cg10336108 | 15 | 101,419,262 | 0.000775 | -0.290 | -0.213 |  |  |     | <i>ALDH1A3</i>   | TSS1500 |
| cg16264520 | 8  | 132,499,419 | 3.89E-05 | -0.290 | -0.212 |  |  |     |                  |         |
| cg04919982 | 12 | 18,243,179  | 8.75E-05 | -0.290 | -0.330 |  |  |     | <i>RERGL</i>     | TSS200  |
| cg04986935 | 10 | 110,673,613 | 0.000153 | -0.290 | -0.251 |  |  | Yes |                  |         |
| cg14091631 | 1  | 225,117,076 | 1.75E-17 | -0.290 | -0.304 |  |  |     | <i>DNAH14</i>    | TSS1500 |
| cg12303623 | 10 | 75,335,352  | 2.15E-09 | -0.290 | -0.248 |  |  |     | <i>USP54</i>     | 1stExon |

|            |    |             |          |        |        |  |  |  |                  |         |
|------------|----|-------------|----------|--------|--------|--|--|--|------------------|---------|
| cg19200333 | 10 | 108,918,391 | 5.14E-05 | -0.290 | -0.282 |  |  |  | <i>SORCS1</i>    | Body    |
| cg20335735 | 6  | 150,068,006 | 3.86E-10 | -0.290 | -0.281 |  |  |  | <i>NUP43</i>     | TSS1500 |
| cg22304522 | 8  | 131,914,037 | 8.1E-09  | -0.290 | -0.292 |  |  |  | <i>ADCY8</i>     | Body    |
| cg20290367 | 17 | 20,060,457  | 1.36E-08 | -0.290 | -0.300 |  |  |  | <i>CYTSB</i>     | Body    |
| cg06240409 | 16 | 10,206,565  | 0.00031  | -0.290 | -0.282 |  |  |  | <i>GRIN2A</i>    | Body    |
| cg07675656 | 16 | 2,105,015   | 3.35E-13 | -0.290 | -0.306 |  |  |  | <i>TSC2</i>      | Body    |
| cg23027179 | 5  | 32,811,515  | 7.02E-07 | -0.290 | -0.183 |  |  |  |                  |         |
| cg19304797 | 12 | 34,445,021  | 0.001712 | -0.290 | -0.212 |  |  |  |                  |         |
| cg07103517 | 7  | 50,348,485  | 0.009882 | -0.290 | -0.284 |  |  |  | <i>IKZF1</i>     | 5'UTR   |
| cg14520280 | 1  | 242,767,727 | 0.015418 | -0.290 | -0.193 |  |  |  |                  |         |
| cg26480289 | 2  | 92,035,167  | 3.63E-05 | -0.290 | -0.235 |  |  |  |                  |         |
| cg05851493 | 12 | 132,142,067 | 0.003468 | -0.290 | -0.206 |  |  |  |                  |         |
| cg01526498 | 14 | 101,416,558 | 3.54E-10 | -0.290 | -0.254 |  |  |  |                  |         |
| cg25972591 | 19 | 58,627,987  | 0.002093 | -0.290 | -0.229 |  |  |  | <i>ZSCAN18</i>   | Body    |
| cg08123100 | 4  | 187,148,430 | 1.17E-11 | -0.290 | -0.258 |  |  |  | <i>KLKB1</i>     | TSS1500 |
| cg15634928 | 5  | 87,894,586  | 2.51E-05 | -0.290 | -0.271 |  |  |  | <i>LOC645323</i> | Body    |
| cg01732875 | 13 | 20,068,905  | 7.45E-05 | -0.290 | -0.254 |  |  |  | <i>TPTE2</i>     | Body    |
| cg21170007 | 9  | 138,465,739 | 0.01363  | -0.290 | -0.202 |  |  |  |                  |         |
| cg27026045 | 8  | 2,242,024   | 5.75E-08 | -0.290 | -0.262 |  |  |  |                  |         |
| cg02060465 | 1  | 152,941,727 | 0.001608 | -0.290 | -0.244 |  |  |  | <i>SPRR4</i>     | TSS1500 |
| cg13845105 | 12 | 112,846,051 | 1.6E-07  | -0.290 | -0.290 |  |  |  | <i>RPL6</i>      | Body    |
| cg00277927 | 19 | 29,456,219  | 1.82E-05 | -0.290 | -0.263 |  |  |  | <i>LOC148145</i> | Body    |
| cg00973309 | 15 | 75,111,129  | 2.12E-06 | -0.290 | -0.242 |  |  |  | <i>LMAN1L</i>    | Body    |
| cg19521610 | 22 | 49,717,457  | 9.33E-08 | -0.290 | -0.291 |  |  |  |                  |         |
| cg20666186 | 19 | 4,038,956   | 6.61E-21 | -0.290 | -0.295 |  |  |  |                  |         |
| cg13130398 | 1  | 174,844,397 | 4.32E-09 | -0.290 | -0.266 |  |  |  | <i>RABGAP1L</i>  | TSS1500 |
| cg05041871 | 2  | 1,732,234   | 0.00158  | -0.291 | -0.302 |  |  |  | <i>PXDN</i>      | Body    |
| cg07459478 | 7  | 55,589,803  | 2E-08    | -0.291 | -0.315 |  |  |  | <i>VOPP1</i>     | Body    |
| cg02605996 | 3  | 148,664,754 | 4.78E-05 | -0.291 | -0.322 |  |  |  |                  |         |
| cg12060838 | 1  | 158,028,936 | 0.005155 | -0.291 | -0.156 |  |  |  | <i>KIRREL</i>    | Body    |
| cg23104248 | 8  | 118,616,037 | 0.000464 | -0.291 | -0.224 |  |  |  |                  |         |
| cg27530186 | 12 | 121,688,459 | 0.000863 | -0.291 | -0.183 |  |  |  | <i>CAMKK2</i>    | Body    |
| cg25021530 | 5  | 44,333,003  | 9.37E-12 | -0.291 | -0.265 |  |  |  | <i>FGF10</i>     | Body    |
| cg17000343 | 8  | 7,834,142   | 0.000441 | -0.291 | -0.209 |  |  |  | <i>FAM66E</i>    | Body    |

|            |    |             |          |        |        |          |        |     |                 |         |
|------------|----|-------------|----------|--------|--------|----------|--------|-----|-----------------|---------|
| cg19661030 | 4  | 8,429,229   | 0.00372  | -0.291 | -0.375 |          |        |     | <i>ACOX3</i>    | 5'UTR   |
| cg13393809 | 2  | 239,974,467 | 2.8E-07  | -0.291 | -0.269 |          |        |     | <i>HDAC4</i>    | 3'UTR   |
| cg11395414 | 19 | 39,443,284  | 0.000189 | -0.291 | -0.210 |          |        | Yes | <i>FBXO17</i>   | 5'UTR   |
| cg24667326 | 1  | 152,973,720 | 0.007856 | -0.291 | -0.230 |          |        |     | <i>SPRR3</i>    | TSS1500 |
| cg09032137 | 11 | 19,362,896  | 0.000317 | -0.291 | -0.218 |          |        |     |                 |         |
| cg00579805 | 1  | 185,822,829 | 2.25E-10 | -0.291 | -0.216 |          |        |     | <i>HMCN1</i>    | Body    |
| cg19716950 | 1  | 170,655,402 | 0.006137 | -0.291 | -0.220 |          |        |     | <i>PRRX1</i>    | Body    |
| cg27223882 | 2  | 154,245,346 | 8.8E-05  | -0.291 | -0.281 |          |        |     |                 |         |
| cg13391455 | 2  | 84,521,105  | 1.31E-07 | -0.291 | -0.244 |          |        |     |                 |         |
| cg14325436 | 19 | 17,404,977  | 0.013704 | -0.291 | -0.285 |          |        |     | <i>ABHD8</i>    | Body    |
| cg16674248 | 22 | 46,664,402  | 2.85E-05 | -0.291 | -0.232 |          |        |     | <i>TTC38</i>    | Body    |
| cg18888137 | 6  | 32,945,759  | 6.48E-08 | -0.291 | -0.318 |          |        |     | <i>BRD2</i>     | Body    |
| cg11950860 | 1  | 152,730,231 | 0.002808 | -0.291 | -0.277 |          |        |     | <i>KPRP</i>     | TSS1500 |
| cg18627442 | 12 | 128,899,917 | 0.032386 | -0.291 | -0.165 |          |        |     | <i>TMEM132C</i> | Body    |
| cg02499308 | 2  | 135,594,780 | 5.54E-06 | -0.291 | -0.270 |          |        |     | <i>ACMSD</i>    | TSS1500 |
| cg03084838 | 16 | 751,603     | 2.86E-10 | -0.291 | -0.294 |          |        |     | <i>FBXL16</i>   | 5'UTR   |
| cg01260308 | 14 | 50,233,662  | 2.45E-09 | -0.291 | -0.303 |          |        |     | <i>KLHDC2</i>   | TSS1500 |
| cg24424217 | 10 | 135,123,421 | 9.46E-19 | -0.291 | -0.286 |          |        |     | <i>ZNF511</i>   | Body    |
| cg04014889 | 15 | 23,890,593  | 0.000214 | -0.291 | -0.216 | 1.61E-17 | -0.178 |     | <i>MAGEL2</i>   | 1stExon |
| cg15384668 | 22 | 47,609,606  | 1.11E-05 | -0.291 | -0.283 |          |        |     |                 |         |
| cg18781372 | 3  | 38,937,304  | 0.011417 | -0.291 | -0.228 |          |        |     | <i>SCN11A</i>   | Body    |
| cg01001049 | 16 | 8,995,730   | 0.000124 | -0.291 | -0.269 |          |        |     | <i>USP7</i>     | Body    |
| cg01259871 | 22 | 41,939,256  | 0.000316 | -0.291 | -0.193 |          |        |     | <i>POLR3H</i>   | Body    |
| cg05624199 | 19 | 41,168,318  | 0.012283 | -0.291 | -0.156 |          |        |     |                 |         |
| cg13741304 | 9  | 140,501,305 | 3.36E-12 | -0.291 | -0.292 |          |        |     | <i>ARRDC1</i>   | Body    |
| cg18647449 | 10 | 134,730,222 | 0.000117 | -0.291 | -0.247 |          |        |     |                 |         |
| cg01803258 | 1  | 159,160,407 | 6.88E-05 | -0.291 | -0.275 |          |        |     | <i>CADM3</i>    | Body    |
| cg12332524 | 11 | 45,733,155  | 1.59E-07 | -0.291 | -0.282 |          |        |     |                 |         |
| cg06533233 | 1  | 186,162,050 | 0.001439 | -0.291 | -0.229 |          |        |     | <i>MIR548F1</i> | Body    |
| cg01142066 | 2  | 96,010,652  | 1.23E-05 | -0.291 | -0.228 |          |        |     | <i>KCNIP3</i>   | Body    |
| cg02581614 | 6  | 131,455,450 | 3.46E-09 | -0.291 | -0.251 |          |        |     |                 |         |
| cg04389917 | X  | 3,238,486   | 0.003417 | -0.291 | -0.256 |          |        |     | <i>MXRA5</i>    | Body    |
| cg03862987 | 4  | 76,596,784  | 1.16E-12 | -0.291 | -0.273 |          |        |     | <i>G3BP2</i>    | 5'UTR   |
| cg19254118 | 19 | 1,907,972   | 1.17E-06 | -0.291 | -0.297 |          |        |     | <i>ADAT3</i>    | 5'UTR   |



|            |    |             |          |        |        |  |  |  |                  |         |
|------------|----|-------------|----------|--------|--------|--|--|--|------------------|---------|
| cg01558785 | 6  | 29,638,162  | 4.34E-05 | -0.292 | -0.217 |  |  |  | <i>MOG</i>       | 3'UTR   |
| cg00175153 | 16 | 2,012,763   | 1.19E-14 | -0.292 | -0.307 |  |  |  | <i>SNORA10</i>   | TSS1500 |
| cg09763095 | 4  | 102,177,107 | 1.26E-07 | -0.292 | -0.194 |  |  |  | <i>PPP3CA</i>    | Body    |
| cg22759261 | 15 | 32,206,583  | 0.002879 | -0.292 | -0.218 |  |  |  |                  |         |
| cg12295053 | 19 | 51,302,741  | 6.15E-21 | -0.292 | -0.258 |  |  |  | <i>C19orf48</i>  | 5'UTR   |
| cg23819286 | 1  | 185,984,412 | 2.07E-06 | -0.292 | -0.308 |  |  |  | <i>HMCN1</i>     | Body    |
| cg16353833 | 2  | 200,488,208 | 3.86E-05 | -0.292 | -0.262 |  |  |  |                  |         |
| cg08644897 | 13 | 112,607,846 | 0.012097 | -0.292 | -0.102 |  |  |  |                  |         |
| cg07260541 | 16 | 51,117,848  | 9.23E-05 | -0.292 | -0.260 |  |  |  |                  |         |
| cg01297500 | 3  | 46,245,390  | 4.33E-24 | -0.292 | -0.253 |  |  |  | <i>CCR1</i>      | Body    |
| cg05363081 | 10 | 133,508,442 | 0.007053 | -0.292 | -0.201 |  |  |  |                  |         |
| cg08697116 | 19 | 51,410,274  | 2.1E-10  | -0.292 | -0.282 |  |  |  | <i>KLK4</i>      | Body    |
| cg04475868 | 16 | 86,380,594  | 0.000483 | -0.292 | -0.211 |  |  |  | <i>LOC732275</i> | TSS1500 |
| cg11375831 | 3  | 167,193,257 | 2.52E-05 | -0.292 | -0.252 |  |  |  | <i>SERPINI2</i>  | TSS1500 |
| cg04972930 | 1  | 158,736,112 | 0.003028 | -0.292 | -0.210 |  |  |  | <i>OR6N1</i>     | 1stExon |
| cg05570079 | X  | 21,856,948  | 2.53E-16 | -0.292 | -0.289 |  |  |  | <i>MBTPS2</i>    | TSS1500 |
| cg08648317 | 11 | 59,807,830  | 1.46E-06 | -0.292 | -0.327 |  |  |  | <i>PLAC1L</i>    | 1stExon |
| cg03196720 | 12 | 6,473,299   | 4.64E-08 | -0.292 | -0.279 |  |  |  | <i>SCNN1A</i>    | Body    |
| cg15021031 | 5  | 146,333,034 | 2.07E-10 | -0.292 | -0.288 |  |  |  | <i>PPP2R2B</i>   | 5'UTR   |
| cg22937354 | 11 | 55,606,216  | 0.000606 | -0.292 | -0.276 |  |  |  | <i>OR5D16</i>    | TSS200  |
| cg03530393 | 7  | 31,850,782  | 2.23E-05 | -0.292 | -0.277 |  |  |  | <i>PDE1C</i>     | Body    |
| cg04157272 | 2  | 68,017,838  | 0.000661 | -0.292 | -0.280 |  |  |  |                  |         |
| cg15726025 | 1  | 32,681,995  | 2.56E-09 | -0.292 | -0.321 |  |  |  | <i>C1orf91</i>   | 3'UTR   |
| cg08214060 | 11 | 132,107,534 | 0.002072 | -0.292 | -0.232 |  |  |  | <i>NTM</i>       | Body    |
| cg01975957 | 1  | 152,798,912 | 0.000565 | -0.292 | -0.233 |  |  |  | <i>LCE1A</i>     | TSS1500 |
| cg12921481 | 1  | 158,747,277 | 0.000435 | -0.292 | -0.304 |  |  |  | <i>OR6N2</i>     | 1stExon |
| cg22540233 | 21 | 31,587,610  | 8.56E-08 | -0.292 | -0.317 |  |  |  | <i>CLDN8</i>     | 1stExon |
| cg00519537 | 16 | 7,796,774   | 7.09E-19 | -0.292 | -0.309 |  |  |  |                  |         |
| cg27238887 | 11 | 824,970     | 5.17E-06 | -0.292 | -0.299 |  |  |  | <i>PNPLA2</i>    | 3'UTR   |
| cg25831281 | X  | 52,841,109  | 0.000851 | -0.293 | -0.228 |  |  |  | <i>XAGE5</i>     | TSS200  |
| cg12908916 | 11 | 124,387,060 | 0.000129 | -0.293 | -0.246 |  |  |  |                  |         |
| cg20582941 | 3  | 35,721,166  | 0.008745 | -0.293 | -0.267 |  |  |  | <i>ARPP-21</i>   | 5'UTR   |
| cg00736201 | 12 | 108,643,267 | 2.36E-07 | -0.293 | -0.321 |  |  |  | <i>WSCD2</i>     | 3'UTR   |
| cg01390061 | 2  | 127,642,574 | 0.000706 | -0.293 | -0.218 |  |  |  |                  |         |

|            |    |             |          |        |        |  |  |     |                     |         |
|------------|----|-------------|----------|--------|--------|--|--|-----|---------------------|---------|
| cg07128660 | 16 | 82,474,489  | 0.000134 | -0.293 | -0.284 |  |  |     |                     |         |
| cg21889448 | 4  | 62,637,815  | 0.001353 | -0.293 | -0.234 |  |  |     | <i>LPHN3</i>        | Body    |
| cg02083707 | 11 | 104,654,124 | 0.016731 | -0.293 | -0.151 |  |  |     |                     |         |
| cg27002325 | 11 | 68,174,209  | 1.92E-09 | -0.293 | -0.292 |  |  |     | <i>LRP5</i>         | Body    |
| cg01027858 | 3  | 112,407,713 | 1.97E-12 | -0.293 | -0.289 |  |  |     |                     |         |
| cg19707128 | 2  | 127,635,279 | 0.045597 | -0.293 | -0.170 |  |  |     |                     |         |
| cg12026858 | 11 | 114,067,446 | 1.6E-09  | -0.293 | -0.268 |  |  |     | <i>ZBTB16</i>       | Body    |
| cg03435384 | 15 | 53,681,873  | 0.001428 | -0.293 | -0.289 |  |  |     |                     |         |
| cg14632902 | 9  | 139,017,648 | 0.000195 | -0.293 | -0.307 |  |  | Yes |                     |         |
| cg11417496 | 6  | 134,142,331 | 3.15E-06 | -0.293 | -0.267 |  |  |     | <i>MGC34034</i>     | Body    |
| cg13391471 | 11 | 88,137,627  | 1.99E-07 | -0.293 | -0.257 |  |  |     |                     |         |
| cg04943241 | 4  | 5,898,879   | 1.55E-05 | -0.293 | -0.194 |  |  |     |                     |         |
| cg12570419 | 9  | 138,636,968 | 9.94E-07 | -0.293 | -0.304 |  |  |     | <i>KCNT1</i>        | Body    |
| cg14921326 | 8  | 119,358,052 | 7.09E-06 | -0.293 | -0.188 |  |  |     | <i>SAMD12</i>       | Body    |
| cg00939432 | 22 | 29,977,677  | 0.001092 | -0.293 | -0.297 |  |  |     | <i>NIPSNAP1</i>     | TSS1500 |
| cg00130530 | 6  | 35,657,202  | 1.94E-12 | -0.293 | -0.269 |  |  |     | <i>FKBP5</i>        | 5'UTR   |
| cg14250336 | 9  | 90,195,885  | 7.46E-10 | -0.293 | -0.282 |  |  |     | <i>DAPK1</i>        | Body    |
| cg12619747 | 8  | 55,180,538  | 8.98E-05 | -0.293 | -0.326 |  |  |     |                     |         |
| cg14271023 | 2  | 238,410,067 | 2.88E-10 | -0.293 | -0.265 |  |  |     | <i>MLPH</i>         | Body    |
| cg03802272 | 3  | 158,361,750 | 0.000122 | -0.293 | -0.215 |  |  |     | <i>GFM1</i>         | TSS1500 |
| cg19856263 | 11 | 127,012,786 | 0.000315 | -0.293 | -0.244 |  |  |     |                     |         |
| cg13745653 | 4  | 159,494,509 | 0.002153 | -0.293 | -0.218 |  |  |     | <i>RXFP1</i>        | Body    |
| cg13211559 | 1  | 20,308,066  | 0.000117 | -0.293 | -0.347 |  |  |     | <i>PLA2G2A</i>      | TSS1500 |
| cg02927058 | 1  | 10,116,780  | 1.14E-09 | -0.293 | -0.281 |  |  |     | <i>UBE4B</i>        | Body    |
| cg12896170 | 6  | 28,890,069  | 1.03E-05 | -0.293 | -0.205 |  |  |     | <i>TRIM27</i>       | Body    |
| cg26460366 | 4  | 17,068,050  | 9.05E-12 | -0.293 | -0.285 |  |  |     |                     |         |
| cg26147514 | 7  | 47,182,756  | 7.34E-05 | -0.293 | -0.216 |  |  |     |                     |         |
| cg11084443 | 15 | 66,963,753  | 1.19E-16 | -0.293 | -0.281 |  |  |     |                     |         |
| cg08101739 | 1  | 152,815,158 | 0.002574 | -0.293 | -0.226 |  |  |     | <i>LCE6A</i>        | TSS200  |
| cg12937141 | X  | 103,267,926 | 0.000274 | -0.293 | -0.187 |  |  |     | <i>MIR1256</i>      | Body    |
| cg27168737 | 1  | 238,049,504 | 0.001895 | -0.293 | -0.272 |  |  |     | <i>LOC100130331</i> | Body    |
| cg16112248 | 7  | 54,164,018  | 0.000754 | -0.294 | -0.190 |  |  |     |                     |         |
| cg02583589 | 3  | 19,791,456  | 0.000175 | -0.294 | -0.271 |  |  |     |                     |         |
| cg03274391 | 3  | 22,413,232  | 9.8E-09  | -0.294 | -0.285 |  |  |     |                     |         |

|            |    |             |          |        |        |  |  |  |                 |         |
|------------|----|-------------|----------|--------|--------|--|--|--|-----------------|---------|
| cg18268488 | 1  | 157,545,234 | 0.011002 | -0.294 | -0.217 |  |  |  | <i>FCRL4</i>    | 3'UTR   |
| cg09220563 | 14 | 54,261,853  | 8.64E-05 | -0.294 | -0.371 |  |  |  |                 |         |
| cg00225902 | 3  | 66,444,122  | 2.16E-20 | -0.294 | -0.275 |  |  |  | <i>LRIG1</i>    | Body    |
| cg02952451 | 15 | 101,938,761 | 6.71E-09 | -0.294 | -0.308 |  |  |  | <i>PCSK6</i>    | Body    |
| cg27170427 | 12 | 130,958,711 | 0.038063 | -0.294 | -0.167 |  |  |  | <i>RIMBP2</i>   | Body    |
| cg27212428 | 4  | 22,031,559  | 9.54E-10 | -0.294 | -0.274 |  |  |  |                 |         |
| cg06307943 | 17 | 79,059,375  | 0.010118 | -0.294 | -0.098 |  |  |  | <i>BAIAP2</i>   | Body    |
| cg07546062 | 14 | 72,925,007  | 0.001585 | -0.294 | -0.309 |  |  |  | <i>RGS6</i>     | Body    |
| cg17504641 | 10 | 44,458,167  | 0.004339 | -0.294 | -0.286 |  |  |  |                 |         |
| cg04674428 | 16 | 58,956,301  | 0.000274 | -0.294 | -0.258 |  |  |  |                 |         |
| cg10761351 | 8  | 6,637,965   | 6.76E-10 | -0.294 | -0.272 |  |  |  |                 |         |
| cg26531371 | 1  | 152,815,068 | 0.007811 | -0.294 | -0.248 |  |  |  | <i>LCE6A</i>    | TSS1500 |
| cg05775492 | 16 | 86,258,717  | 0.000148 | -0.294 | -0.235 |  |  |  |                 |         |
| cg22686718 | 12 | 127,209,925 | 1.96E-05 | -0.294 | -0.275 |  |  |  |                 |         |
| cg24582743 | 13 | 112,885,802 | 0.000454 | -0.294 | -0.216 |  |  |  |                 |         |
| cg08780218 | 5  | 172,194,729 | 4.6E-07  | -0.294 | -0.308 |  |  |  |                 |         |
| cg25843833 | 11 | 20,177,078  | 0.003484 | -0.294 | -0.302 |  |  |  |                 |         |
| cg02147240 | 14 | 73,011,054  | 0.000239 | -0.294 | -0.326 |  |  |  | <i>RGS6</i>     | Body    |
| cg11327391 | X  | 20,161,079  | 3.19E-09 | -0.294 | -0.279 |  |  |  | <i>EIF1AX</i>   | TSS1500 |
| cg01147665 | 3  | 32,146,075  | 1.91E-07 | -0.294 | -0.283 |  |  |  |                 |         |
| cg03187668 | 11 | 55,431,152  | 0.001045 | -0.294 | -0.221 |  |  |  | <i>OR4C6</i>    | TSS1500 |
| cg03655692 | 8  | 118,636,496 | 8.38E-06 | -0.294 | -0.269 |  |  |  |                 |         |
| cg09684588 | 5  | 4,207,758   | 0.000325 | -0.294 | -0.240 |  |  |  |                 |         |
| cg20951266 | 1  | 152,856,288 | 0.004357 | -0.294 | -0.269 |  |  |  | <i>SMCP</i>     | 5'UTR   |
| cg14283299 | 9  | 129,675,096 | 3.84E-09 | -0.294 | -0.287 |  |  |  |                 |         |
| cg08331163 | 11 | 59,271,519  | 3.01E-05 | -0.294 | -0.285 |  |  |  | <i>OR4D11</i>   | 1stExon |
| cg13473274 | 11 | 109,460,118 | 3.79E-08 | -0.294 | -0.292 |  |  |  |                 |         |
| cg17031631 | 1  | 207,192,387 | 6.65E-11 | -0.294 | -0.289 |  |  |  | <i>C1orf116</i> | 3'UTR   |
| cg22932313 | 11 | 34,535,189  | 0.019415 | -0.294 | -0.307 |  |  |  | <i>ELF5</i>     | 5'UTR   |
| cg11036656 | 3  | 81,887,543  | 0.004896 | -0.294 | -0.309 |  |  |  |                 |         |
| cg18956562 | 7  | 144,149,304 | 2.72E-13 | -0.294 | -0.291 |  |  |  | <i>TPK1</i>     | 3'UTR   |
| cg05532980 | 16 | 23,721,859  | 0.000514 | -0.294 | -0.219 |  |  |  | <i>ERN2</i>     | Body    |
| cg20396393 | 7  | 23,720,838  | 1.19E-11 | -0.294 | -0.292 |  |  |  | <i>C7orf46</i>  | Body    |
| cg11684450 | 19 | 1,272,853   | 6.51E-06 | -0.294 | -0.290 |  |  |  | <i>CIRBP</i>    | Body    |

|            |    |             |          |        |        |          |        |     |                 |         |
|------------|----|-------------|----------|--------|--------|----------|--------|-----|-----------------|---------|
| cg04228039 | 11 | 104,035,557 | 0.000447 | -0.294 | -0.264 |          |        |     | <i>PDGFD</i>    | TSS1500 |
| cg11158236 | X  | 25,021,934  | 3.03E-09 | -0.294 | -0.299 |          |        |     | <i>ARX</i>      | 3'UTR   |
| cg20801711 | 8  | 55,278,980  | 1.59E-05 | -0.295 | -0.315 |          |        |     |                 |         |
| cg25382573 | 12 | 93,096,844  | 3.2E-08  | -0.295 | -0.281 |          |        |     | <i>C12orf74</i> | 5'UTR   |
| cg01917716 | 11 | 59,824,541  | 6.81E-07 | -0.295 | -0.258 |          |        |     | <i>MS4A3</i>    | 5'UTR   |
| cg14163691 | 14 | 105,268,590 | 0.001593 | -0.295 | -0.151 |          |        |     | <i>ZBTB42</i>   | Body    |
| cg11323650 | 11 | 55,905,246  | 5.95E-05 | -0.295 | -0.259 |          |        |     | <i>OR8J3</i>    | TSS200  |
| cg04720596 | 19 | 4,304,173   | 1.79E-11 | -0.295 | -0.273 |          |        |     | <i>FSD1</i>     | TSS1500 |
| cg01882930 | 22 | 39,713,008  | 2.08E-19 | -0.295 | -0.281 |          |        |     | <i>RPL3</i>     | Body    |
| cg05638439 | 16 | 711,235     | 1.03E-12 | -0.295 | -0.264 |          |        |     | <i>WDR90</i>    | Body    |
| cg17054691 | 17 | 79,813,439  | 5.33E-16 | -0.295 | -0.259 |          |        |     | <i>P4HB</i>     | Body    |
| cg00187686 | 11 | 59,634,218  | 3.43E-07 | -0.295 | -0.224 | 2.43E-08 | -0.195 |     | <i>TCN1</i>     | TSS200  |
| cg27060294 | 4  | 16,839,404  | 6.97E-05 | -0.295 | -0.263 |          |        |     | <i>LDB2</i>     | Body    |
| cg22836359 | 12 | 6,933,548   | 0.001692 | -0.295 | -0.170 |          |        |     | <i>GPR162</i>   | Body    |
| cg02877575 | 11 | 131,411,235 | 0.000126 | -0.295 | -0.318 |          |        |     | <i>NTM</i>      | Body    |
| cg05369766 | 8  | 50,629,982  | 0.008288 | -0.295 | -0.198 |          |        |     |                 |         |
| cg21877907 | 11 | 131,506,338 | 1.91E-05 | -0.295 | -0.273 |          |        |     | <i>NTM</i>      | Body    |
| cg12687463 | 1  | 196,787,850 | 0.000243 | -0.295 | -0.274 |          |        |     | <i>CFHR1</i>    | TSS1500 |
| cg00130710 | 6  | 40,565,925  | 2.25E-09 | -0.295 | -0.294 |          |        |     |                 |         |
| cg04567009 | 1  | 161,600,769 | 3.04E-05 | -0.295 | -0.289 | 1.83E-13 | -0.162 |     | <i>FCGR3B</i>   | Body    |
| cg23010585 | 11 | 67,210,192  | 1.72E-39 | -0.295 | -0.285 |          |        |     | <i>CORO1B</i>   | 5'UTR   |
| cg05042938 | 1  | 170,705,977 | 0.001461 | -0.295 | -0.315 |          |        |     | <i>PRRX1</i>    | 3'UTR   |
| cg15766492 | X  | 103,268,280 | 0.028666 | -0.295 | -0.162 |          |        |     | <i>H2BFWT</i>   | TSS200  |
| cg19582822 | 19 | 51,375,975  | 2.19E-06 | -0.295 | -0.226 |          |        |     | <i>KLK2</i>     | TSS1500 |
| cg22907892 | 14 | 97,673,726  | 0.000462 | -0.295 | -0.313 |          |        |     |                 |         |
| cg18236584 | 5  | 151,476,553 | 0.001001 | -0.295 | -0.299 |          |        | Yes |                 |         |
| cg03197792 | 2  | 242,190,985 | 1.89E-05 | -0.295 | -0.236 |          |        |     | <i>HDLBP</i>    | Body    |
| cg04906886 | 3  | 100,755,611 | 2.87E-08 | -0.295 | -0.270 |          |        |     |                 |         |
| cg13498800 | 1  | 182,031,601 | 5.4E-07  | -0.295 | -0.299 |          |        |     | <i>ZNF648</i>   | TSS1500 |
| cg15489196 | 2  | 1,732,347   | 1.21E-08 | -0.295 | -0.299 |          |        |     | <i>PXDN</i>     | Body    |
| cg23399286 | 8  | 133,072,873 | 0.000249 | -0.295 | -0.293 |          |        |     | <i>OC90</i>     | TSS1500 |
| cg12031375 | 2  | 88,408,688  | 0.000188 | -0.296 | -0.165 |          |        |     | <i>SMYD1</i>    | Body    |
| cg13070632 | 7  | 57,714,756  | 0.000672 | -0.296 | -0.228 |          |        |     |                 |         |
| cg16020016 | 12 | 56,038,795  | 6.2E-06  | -0.296 | -0.283 |          |        |     |                 |         |

|            |    |             |          |        |        |          |        |  |                 |         |
|------------|----|-------------|----------|--------|--------|----------|--------|--|-----------------|---------|
| cg10919344 | 11 | 59,210,634  | 6.76E-05 | -0.296 | -0.302 |          |        |  | <i>OR5A1</i>    | TSS200  |
| cg08157459 | 13 | 112,176,430 | 0.003808 | -0.296 | -0.180 |          |        |  |                 |         |
| cg03447366 | 1  | 2,827,410   | 1.33E-05 | -0.296 | -0.275 |          |        |  |                 |         |
| cg07222900 | 2  | 240,279,976 | 1.47E-05 | -0.296 | -0.263 |          |        |  | <i>HDAC4</i>    | 5'UTR   |
| cg05314639 | 13 | 114,109,729 | 0.038271 | -0.296 | -0.390 |          |        |  |                 |         |
| cg15451642 | 8  | 13,424,928  | 1.6E-06  | -0.296 | -0.284 |          |        |  | <i>C8orf48</i>  | 1stExon |
| cg27124218 | 16 | 48,191,328  | 0.001514 | -0.296 | -0.217 |          |        |  |                 |         |
| cg01637734 | 1  | 157,811,303 | 7.57E-05 | -0.296 | -0.250 | 6.54E-12 | -0.180 |  | <i>CD5L</i>     | Body    |
| cg02735829 | 5  | 180,167,566 | 0.000245 | -0.296 | -0.289 |          |        |  | <i>OR2Y1</i>    | TSS1500 |
| cg21696975 | 1  | 153,391,644 | 0.000278 | -0.296 | -0.239 |          |        |  | <i>S100A7A</i>  | Body    |
| cg23212751 | 1  | 44,401,433  | 1.1E-06  | -0.296 | -0.315 |          |        |  | <i>ARTN</i>     | TSS1500 |
| cg21665774 | 19 | 34,790,692  | 9.78E-10 | -0.296 | -0.286 | 1.01E-07 | -0.092 |  | <i>KIAA0355</i> | 5'UTR   |
| cg12271759 | 2  | 40,468,548  | 0.000109 | -0.296 | -0.219 |          |        |  | <i>SLC8A1</i>   | Body    |
| cg19246018 | 2  | 240,031,588 | 2.33E-10 | -0.296 | -0.276 |          |        |  | <i>HDAC4</i>    | Body    |
| cg10859449 | 14 | 57,628,483  | 1.64E-09 | -0.296 | -0.285 |          |        |  |                 |         |
| cg00685853 | 2  | 88,648,947  | 0.000139 | -0.296 | -0.288 |          |        |  |                 |         |
| cg12248672 | 7  | 63,152,783  | 3.02E-07 | -0.296 | -0.268 |          |        |  |                 |         |
| cg18479711 | 2  | 240,031,454 | 2.54E-09 | -0.296 | -0.275 |          |        |  | <i>HDAC4</i>    | Body    |
| cg21148923 | 5  | 45,553,518  | 0.000732 | -0.296 | -0.262 |          |        |  | <i>HCN1</i>     | Body    |
| cg04735773 | 8  | 47,156,401  | 0.000361 | -0.296 | -0.252 |          |        |  |                 |         |
| cg10305299 | 20 | 29,844,549  | 0.003387 | -0.296 | -0.231 |          |        |  | <i>DEFB115</i>  | TSS1500 |
| cg08023276 | 2  | 201,388,625 | 6.31E-10 | -0.296 | -0.294 |          |        |  |                 |         |
| cg00882611 | 14 | 21,689,119  | 2.23E-08 | -0.296 | -0.231 |          |        |  | <i>HNRNPC</i>   | Body    |
| cg18450930 | 11 | 5,444,223   | 0.004847 | -0.296 | -0.288 |          |        |  | <i>OR51Q1</i>   | 1stExon |
| cg02959725 | 3  | 148,664,701 | 0.000163 | -0.296 | -0.366 |          |        |  |                 |         |
| cg13020760 | 3  | 193,096,486 | 5.74E-08 | -0.297 | -0.290 |          |        |  | <i>ATP13A5</i>  | 1stExon |
| cg10327756 | 4  | 175,841,091 | 8E-07    | -0.297 | -0.286 |          |        |  | <i>ADAM29</i>   | 5'UTR   |
| cg03031988 | 6  | 31,510,729  | 7.25E-21 | -0.297 | -0.302 |          |        |  | <i>BAT1</i>     | TSS1500 |
| cg23118188 | 11 | 133,853,531 | 0.035997 | -0.297 | -0.184 |          |        |  |                 |         |
| cg21665905 | 12 | 82,121,138  | 1.06E-09 | -0.297 | -0.258 |          |        |  | <i>PPFIA2</i>   | Body    |
| cg24574793 | 6  | 29,414,802  | 5.87E-06 | -0.297 | -0.265 |          |        |  |                 |         |
| cg19939130 | 1  | 158,978,468 | 7.47E-06 | -0.297 | -0.284 |          |        |  | <i>IFI16</i>    | TSS1500 |
| cg12439157 | 1  | 170,628,856 | 2.36E-06 | -0.297 | -0.302 |          |        |  |                 |         |
| cg14023451 | 6  | 24,489,887  | 5.67E-11 | -0.297 | -0.285 | 4.38E-10 | -0.136 |  | <i>GPLD1</i>    | TSS200  |

|            |    |             |          |        |        |  |     |  |                 |         |
|------------|----|-------------|----------|--------|--------|--|-----|--|-----------------|---------|
| cg15138339 | 17 | 40,715,222  | 2.98E-41 | -0.297 | -0.286 |  |     |  | <i>COASY</i>    | 1stExon |
| cg12157444 | 8  | 133,091,848 | 0.001423 | -0.297 | -0.282 |  |     |  | <i>HHLA1</i>    | Body    |
| cg02814558 | X  | 150,867,810 | 0.001296 | -0.297 | -0.237 |  |     |  | <i>PRRG3</i>    | Body    |
| cg26904169 | 7  | 89,839,865  | 1.78E-18 | -0.297 | -0.287 |  |     |  | <i>STEAP2</i>   | TSS1500 |
| cg19815813 | 13 | 101,186,116 | 4.83E-10 | -0.297 | -0.266 |  |     |  | <i>A2LD1</i>    | TSS200  |
| cg03168749 | 11 | 124,413,574 | 0.000322 | -0.297 | -0.283 |  |     |  | <i>OR8B12</i>   | TSS200  |
| cg21974506 | 6  | 33,141,291  | 0.005148 | -0.297 | -0.138 |  |     |  | <i>COL11A2</i>  | Body    |
| cg27021722 | 4  | 22,999,077  | 0.000123 | -0.297 | -0.237 |  |     |  |                 |         |
| cg24488391 | 1  | 170,113,838 | 0.000731 | -0.297 | -0.209 |  |     |  | <i>METTL11B</i> | TSS1500 |
| cg02613223 | 1  | 158,724,794 | 2.04E-08 | -0.297 | -0.270 |  | Yes |  | <i>OR6K6</i>    | 1stExon |
| cg10825847 | 11 | 104,894,216 | 2.8E-05  | -0.297 | -0.277 |  |     |  | <i>CASP5</i>    | TSS1500 |
| cg23692193 | 1  | 102,700,639 | 0.019463 | -0.297 | -0.220 |  |     |  |                 |         |
| cg15216899 | 3  | 171,437,465 | 1.08E-10 | -0.297 | -0.293 |  |     |  | <i>PLD1</i>     | Body    |
| cg21463605 | 22 | 18,268,249  | 1.55E-12 | -0.297 | -0.301 |  |     |  |                 |         |
| cg20321270 | 4  | 23,155,692  | 7.09E-05 | -0.297 | -0.258 |  |     |  |                 |         |
| cg26685404 | 16 | 23,957,272  | 2.93E-06 | -0.297 | -0.268 |  |     |  | <i>PRKCB</i>    | Body    |
| cg02799298 | 20 | 59,173,680  | 0.001841 | -0.297 | -0.235 |  |     |  |                 |         |
| cg27057524 | 1  | 101,830,939 | 1.02E-08 | -0.297 | -0.312 |  |     |  |                 |         |
| cg05399607 | 7  | 34,874,533  | 0.000181 | -0.297 | -0.275 |  |     |  | <i>AAA1</i>     | TSS1500 |
| cg24202916 | 20 | 41,984,270  | 0.003122 | -0.297 | -0.158 |  |     |  |                 |         |
| cg05679403 | 4  | 37,650,328  | 3.22E-10 | -0.297 | -0.281 |  |     |  | <i>RELL1</i>    | Body    |
| cg18044044 | 19 | 9,325,552   | 0.000631 | -0.297 | -0.210 |  |     |  | <i>OR7D4</i>    | TSS200  |
| cg20934839 | 4  | 159,234,917 | 7.67E-08 | -0.297 | -0.298 |  |     |  |                 |         |
| cg01890568 | 17 | 31,437,649  | 0.034714 | -0.298 | -0.132 |  |     |  | <i>ACCN1</i>    | Body    |
| cg15905666 | 11 | 50,003,963  | 0.001693 | -0.298 | -0.258 |  |     |  | <i>OR4C12</i>   | 1stExon |
| cg19235071 | 6  | 114,891,274 | 7.89E-07 | -0.298 | -0.307 |  |     |  |                 |         |
| cg22211507 | 3  | 108,564,871 | 6.75E-17 | -0.298 | -0.295 |  |     |  | <i>TRAT1</i>    | Body    |
| cg13637269 | 19 | 22,697,330  | 0.012956 | -0.298 | -0.200 |  |     |  |                 |         |
| cg14427243 | 2  | 88,428,522  | 0.003439 | -0.298 | -0.263 |  |     |  | <i>FABP1</i>    | TSS1500 |
| cg24874998 | 3  | 163,021,378 | 1.16E-07 | -0.298 | -0.298 |  |     |  |                 |         |
| cg07830472 | 7  | 97,983,916  | 1.31E-12 | -0.298 | -0.286 |  |     |  | <i>BAIAP2L1</i> | Body    |
| cg04730443 | X  | 26,210,529  | 0.022863 | -0.298 | -0.301 |  |     |  | <i>MAGEB6</i>   | TSS200  |
| cg05815404 | 17 | 78,825,501  | 4.4E-08  | -0.298 | -0.310 |  |     |  | <i>RPTOR</i>    | Body    |
| cg05897122 | 4  | 53,112,707  | 1.83E-13 | -0.298 | -0.327 |  |     |  |                 |         |

|            |    |             |          |        |        |  |  |  |                 |         |
|------------|----|-------------|----------|--------|--------|--|--|--|-----------------|---------|
| cg16572957 | 1  | 2,799,354   | 1.94E-06 | -0.298 | -0.233 |  |  |  |                 |         |
| cg00219321 | 5  | 153,318,647 | 0.000315 | -0.298 | -0.238 |  |  |  |                 |         |
| cg11620135 | 17 | 79,011,140  | 1.34E-09 | -0.298 | -0.286 |  |  |  | <i>BAIAP2</i>   | Body    |
| cg01388054 | 7  | 48,068,321  | 3.35E-10 | -0.298 | -0.276 |  |  |  | <i>SUNC1</i>    | Body    |
| cg23188582 | 10 | 42,970,625  | 0.002857 | -0.298 | -0.180 |  |  |  | <i>LOC84856</i> | TSS1500 |
| cg21571160 | 1  | 207,262,553 | 2.02E-11 | -0.298 | -0.261 |  |  |  | <i>C4BPB</i>    | 5'UTR   |
| cg23935006 | 15 | 32,215,789  | 0.021746 | -0.298 | -0.260 |  |  |  |                 |         |
| cg12421282 | 1  | 41,158,986  | 6.76E-11 | -0.298 | -0.313 |  |  |  | <i>NFYC</i>     | 5'UTR   |
| cg03437887 | 2  | 22,605,688  | 0.001212 | -0.298 | -0.228 |  |  |  |                 |         |
| cg00242098 | 1  | 152,730,718 | 0.004308 | -0.298 | -0.202 |  |  |  | <i>KPRP</i>     | 5'UTR   |
| cg19094872 | 2  | 242,065,898 | 4.75E-11 | -0.298 | -0.274 |  |  |  | <i>PASK</i>     | Body    |
| cg10902514 | 2  | 188,211,981 | 3.58E-09 | -0.298 | -0.297 |  |  |  | <i>CALCRL</i>   | Body    |
| cg07039362 | 16 | 55,908,870  | 0.000254 | -0.298 | -0.229 |  |  |  | <i>CES7</i>     | Body    |
| cg00540540 | 5  | 167,219,531 | 0.000198 | -0.298 | -0.302 |  |  |  | <i>ODZ2</i>     | Body    |
| cg02668655 | 1  | 241,523,165 | 0.000907 | -0.298 | -0.204 |  |  |  |                 |         |
| cg02886578 | 1  | 153,176,083 | 1.39E-05 | -0.298 | -0.255 |  |  |  | <i>LELP1</i>    | 5'UTR   |
| cg26953403 | X  | 151,900,081 | 0.000696 | -0.298 | -0.230 |  |  |  | <i>MAGEA12</i>  | Body    |
| cg16903174 | 2  | 9,468,351   | 0.002093 | -0.298 | -0.125 |  |  |  | <i>ASAP2</i>    | Body    |
| cg24512097 | 4  | 156,298,332 | 0.001565 | -0.298 | -0.321 |  |  |  | <i>MAP9</i>     | TSS1500 |
| cg02776628 | 6  | 37,465,322  | 0.000454 | -0.298 | -0.250 |  |  |  | <i>C6orf129</i> | Body    |
| cg16932304 | 20 | 44,168,796  | 4.61E-08 | -0.298 | -0.331 |  |  |  | <i>WFDC6</i>    | TSS1500 |
| cg26231761 | 1  | 4,744,796   | 0.002593 | -0.298 | -0.196 |  |  |  | <i>AJAP1</i>    | Body    |
| cg26688762 | 5  | 1,763,902   | 1.78E-11 | -0.298 | -0.284 |  |  |  |                 |         |
| cg24955680 | 11 | 103,907,715 | 0.001508 | -0.298 | -0.274 |  |  |  | <i>PDGFD</i>    | Body    |
| cg25097705 | 4  | 175,887,842 | 5.86E-06 | -0.298 | -0.303 |  |  |  | <i>ADAM29</i>   | 5'UTR   |
| cg16993015 | 11 | 8,006,143   | 1.75E-13 | -0.298 | -0.278 |  |  |  |                 |         |
| cg03979510 | 16 | 5,641,033   | 0.00031  | -0.298 | -0.209 |  |  |  |                 |         |
| cg06463670 | 8  | 2,112,369   | 0.007144 | -0.298 | -0.189 |  |  |  |                 |         |
| cg21074959 | 2  | 203,044,287 | 1.66E-09 | -0.298 | -0.276 |  |  |  |                 |         |
| cg19503462 | 14 | 47,872,288  | 0.000852 | -0.299 | -0.268 |  |  |  | <i>MDGA2</i>    | Body    |
| cg13823188 | 17 | 80,039,244  | 0.006889 | -0.299 | -0.150 |  |  |  | <i>FASN</i>     | Body    |
| cg07238710 | 12 | 52,509,845  | 1.15E-06 | -0.299 | -0.303 |  |  |  |                 |         |
| cg01281718 | 6  | 71,376,634  | 0.000144 | -0.299 | -0.233 |  |  |  | <i>SMAP1</i>    | TSS1500 |
| cg04317765 | 14 | 72,219,158  | 2.32E-05 | -0.299 | -0.200 |  |  |  |                 |         |

|            |    |             |          |        |        |  |  |     |                 |         |
|------------|----|-------------|----------|--------|--------|--|--|-----|-----------------|---------|
| cg23244463 | 8  | 73,848,937  | 0.004458 | -0.299 | -0.253 |  |  |     | <i>KCNB2</i>    | Body    |
| cg09798801 | 4  | 137,277,541 | 1.01E-06 | -0.299 | -0.211 |  |  |     |                 |         |
| cg00341885 | 19 | 4,323,034   | 0.005247 | -0.299 | -0.399 |  |  |     | <i>FSD1</i>     | Body    |
| cg13842222 | 4  | 185,972,881 | 1.28E-06 | -0.299 | -0.245 |  |  |     |                 |         |
| cg00420742 | 19 | 54,313,004  | 1.51E-13 | -0.299 | -0.282 |  |  |     | <i>NLRP12</i>   | Body    |
| cg07694404 | 10 | 133,572,173 | 8.88E-06 | -0.299 | -0.251 |  |  |     |                 |         |
| cg23056713 | 11 | 131,609,432 | 0.020356 | -0.299 | -0.193 |  |  |     | <i>NTM</i>      | Body    |
| cg14492337 | 17 | 79,813,507  | 2.52E-05 | -0.299 | -0.218 |  |  |     | <i>P4HB</i>     | Body    |
| cg22963629 | 7  | 31,147,341  | 0.005684 | -0.299 | -0.247 |  |  |     |                 |         |
| cg02998017 | 1  | 196,578,917 | 0.000441 | -0.299 | -0.278 |  |  |     | <i>KCNT2</i>    | TSS1500 |
| cg03458344 | 1  | 170,964,477 | 1.64E-05 | -0.299 | -0.315 |  |  |     | <i>C1orf129</i> | Body    |
| cg01986717 | 19 | 35,535,021  | 2.59E-05 | -0.299 | -0.176 |  |  |     | <i>HPN</i>      | Body    |
| cg10926851 | 5  | 146,253,830 | 0.000365 | -0.299 | -0.286 |  |  |     | <i>PPP2R2B</i>  | Body    |
| cg09298971 | 6  | 31,846,249  | 8.4E-40  | -0.299 | -0.315 |  |  |     | <i>SLC44A4</i>  | Body    |
| cg17584490 | 17 | 41,144,822  | 2.29E-16 | -0.299 | -0.319 |  |  |     | <i>RUNDC1</i>   | 3'UTR   |
| cg05212892 | 7  | 158,533,877 | 0.001766 | -0.299 | -0.272 |  |  |     | <i>ESYT2</i>    | Body    |
| cg09355820 | 1  | 10,092,237  | 5.77E-09 | -0.299 | -0.300 |  |  |     | <i>UBE4B</i>    | TSS1500 |
| cg00311883 | 1  | 235,099,120 | 1.23E-11 | -0.299 | -0.308 |  |  |     |                 |         |
| cg23212642 | 8  | 73,007,331  | 0.00292  | -0.299 | -0.214 |  |  |     |                 |         |
| cg23860325 | 7  | 54,271,152  | 1.33E-07 | -0.299 | -0.285 |  |  |     | <i>HPVC1</i>    | TSS1500 |
| cg00202568 | 8  | 55,528,166  | 0.000466 | -0.299 | -0.242 |  |  |     | <i>RP1</i>      | TSS1500 |
| cg19704683 | 10 | 94,609,401  | 1.24E-10 | -0.299 | -0.283 |  |  | Yes | <i>EXOC6</i>    | Body    |
| cg00093688 | 9  | 140,113,369 | 2.69E-14 | -0.299 | -0.297 |  |  |     | <i>NDOR1</i>    | 3'UTR   |
| cg05402891 | 14 | 96,152,661  | 9.91E-22 | -0.299 | -0.290 |  |  |     | <i>TCL1B</i>    | TSS200  |
| cg00927939 | 7  | 48,962,376  | 0.003068 | -0.299 | -0.226 |  |  |     |                 |         |
| cg11352847 | 7  | 97,841,440  | 0.001214 | -0.299 | -0.178 |  |  |     | <i>BHLHA15</i>  | TSS200  |
| cg27235829 | 1  | 158,390,759 | 0.001157 | -0.299 | -0.219 |  |  |     | <i>OR10K2</i>   | TSS200  |
| cg27513213 | 19 | 3,978,143   | 0.010417 | -0.300 | -0.313 |  |  |     | <i>EEF2</i>     | Body    |
| cg26105115 | 10 | 10,099,469  | 0.001568 | -0.300 | -0.239 |  |  |     |                 |         |
| cg08897422 | 7  | 8,666,902   | 1.9E-12  | -0.300 | -0.294 |  |  |     | <i>NXPH1</i>    | Body    |
| cg13449257 | 9  | 137,355,128 | 0.001929 | -0.300 | -0.180 |  |  |     |                 |         |
| cg24104433 | 11 | 79,154,353  | 1.19E-05 | -0.300 | -0.210 |  |  |     |                 |         |
| cg05116002 | 3  | 58,151,255  | 2.39E-11 | -0.300 | -0.252 |  |  |     | <i>FLNB</i>     | Body    |
| cg05580560 | 3  | 108,607,138 | 0.007966 | -0.300 | -0.203 |  |  |     |                 |         |



|            |    |             |          |        |        |  |  |  |                  |         |
|------------|----|-------------|----------|--------|--------|--|--|--|------------------|---------|
| cg10010103 | 2  | 115,567,258 | 8.35E-06 | -0.300 | -0.276 |  |  |  | <i>DPP10</i>     | Body    |
| cg19777644 | 1  | 167,902,728 | 2.36E-08 | -0.300 | -0.239 |  |  |  | <i>BRP44</i>     | Body    |
| cg27160524 | 2  | 1,691,184   | 4.23E-20 | -0.300 | -0.300 |  |  |  | <i>PXDN</i>      | Body    |
| cg18630756 | 10 | 107,460,450 | 5.39E-05 | -0.300 | -0.287 |  |  |  |                  |         |
| cg18995042 | 3  | 191,797,208 | 0.010089 | -0.300 | -0.194 |  |  |  |                  |         |
| cg14569837 | 11 | 55,798,206  | 0.000105 | -0.300 | -0.228 |  |  |  | <i>OR5AS1</i>    | 1stExon |
| cg21866125 | 19 | 56,274,428  | 6.27E-08 | -0.300 | -0.300 |  |  |  | <i>RFPL4A</i>    | Body    |
| cg08754268 | 2  | 173,809,244 | 3.74E-15 | -0.300 | -0.263 |  |  |  | <i>RAPGEF4</i>   | Body    |
| cg14332049 | 6  | 153,241,931 | 4.05E-07 | -0.300 | -0.303 |  |  |  |                  |         |
| cg26127166 | 9  | 116,812,388 | 5.31E-11 | -0.300 | -0.263 |  |  |  | <i>ZNF618</i>    | Body    |
| cg06655097 | 4  | 177,455,600 | 7.82E-12 | -0.300 | -0.313 |  |  |  |                  |         |
| cg03228065 | 16 | 2,276,770   | 7.94E-05 | -0.300 | -0.240 |  |  |  | <i>E4F1</i>      | Body    |
| cg01153946 | 20 | 37,062,621  | 6.38E-07 | -0.300 | -0.253 |  |  |  | <i>LOC388796</i> | Body    |
| cg27149471 | 11 | 56,043,514  | 9.38E-05 | -0.300 | -0.262 |  |  |  | <i>OR5T1</i>     | 1stExon |
| cg27294813 | 2  | 109,791,599 | 3E-13    | -0.300 | -0.292 |  |  |  | <i>SH3RF3</i>    | Body    |
| cg24296761 | 19 | 42,408,458  | 3.73E-07 | -0.300 | -0.298 |  |  |  | <i>ARHGEF1</i>   | Body    |
| cg16354520 | 1  | 152,671,707 | 4.84E-05 | -0.300 | -0.265 |  |  |  | <i>LCE2A</i>     | 3'UTR   |
| cg20307184 | 7  | 48,351,895  | 5.56E-09 | -0.300 | -0.269 |  |  |  | <i>ABCA13</i>    | Body    |
| cg17240725 | 7  | 73,149,356  | 2.11E-07 | -0.300 | -0.247 |  |  |  | <i>WBSCR26</i>   | TSS200  |
| cg27450010 | 4  | 16,639,181  | 7.49E-14 | -0.300 | -0.303 |  |  |  | <i>LDB2</i>      | Body    |
| cg04911050 | 16 | 677,664     | 0.00049  | -0.300 | -0.219 |  |  |  | <i>RAB40C</i>    | 3'UTR   |
| cg24384051 | 11 | 124,267,100 | 6.36E-05 | -0.300 | -0.314 |  |  |  | <i>OR8B3</i>     | 1stExon |
| cg08243401 | 13 | 22,231,844  | 3.58E-05 | -0.301 | -0.280 |  |  |  |                  |         |
| cg06534427 | 22 | 39,713,022  | 3.74E-08 | -0.301 | -0.253 |  |  |  | <i>RPL3</i>      | Body    |
| cg05417596 | 12 | 34,443,436  | 4.99E-11 | -0.301 | -0.267 |  |  |  |                  |         |
| cg14331720 | 8  | 55,624,766  | 6.17E-05 | -0.301 | -0.266 |  |  |  |                  |         |
| cg21643095 | 11 | 105,009,375 | 2.32E-07 | -0.301 | -0.296 |  |  |  | <i>CARD18</i>    | 3'UTR   |
| cg21964391 | 1  | 218,253,368 | 4.24E-10 | -0.301 | -0.330 |  |  |  |                  |         |
| cg22399703 | 2  | 19,456,333  | 9.87E-28 | -0.301 | -0.305 |  |  |  |                  |         |
| cg05132150 | 4  | 108,069,982 | 4.83E-07 | -0.301 | -0.300 |  |  |  |                  |         |
| cg10194573 | 1  | 152,730,426 | 0.002167 | -0.301 | -0.206 |  |  |  | <i>KPRP</i>      | TSS200  |
| cg20431748 | 1  | 179,555,999 | 2.84E-18 | -0.301 | -0.278 |  |  |  |                  |         |
| cg11080915 | 1  | 157,509,149 | 7.58E-09 | -0.301 | -0.258 |  |  |  | <i>FCRL5</i>     | Body    |
| cg07649045 | 11 | 7,260,764   | 0.000107 | -0.301 | -0.280 |  |  |  |                  |         |

|            |    |             |          |        |        |          |        |     |                     |         |
|------------|----|-------------|----------|--------|--------|----------|--------|-----|---------------------|---------|
| cg18274315 | 11 | 103,858,893 | 1.36E-11 | -0.301 | -0.291 |          |        |     | <i>PDGFD</i>        | Body    |
| cg05011784 | 15 | 24,726,256  | 0.000133 | -0.301 | -0.255 |          |        |     |                     |         |
| cg05126581 | 1  | 216,144,819 | 0.000346 | -0.301 | -0.324 |          |        |     | <i>USH2A</i>        | Body    |
| cg05184519 | 11 | 132,080,258 | 4.14E-05 | -0.301 | -0.334 |          |        |     | <i>NTM</i>          | Body    |
| cg09483847 | X  | 21,960,827  | 0.009234 | -0.301 | -0.145 |          |        |     | <i>SMS</i>          | Body    |
| cg21859290 | 11 | 67,274,402  | 7.82E-17 | -0.301 | -0.287 |          |        |     | <i>CDK2AP2</i>      | 3'UTR   |
| cg12681771 | 5  | 25,910,913  | 0.000284 | -0.301 | -0.238 |          |        |     |                     |         |
| cg00314343 | 15 | 92,428,182  | 0.002416 | -0.301 | -0.227 |          |        |     | <i>SLCO3A1</i>      | Body    |
| cg07630816 | 4  | 23,549,992  | 1.92E-06 | -0.301 | -0.255 |          |        |     |                     |         |
| cg13088755 | X  | 78,200,041  | 4.55E-05 | -0.301 | -0.239 | 2.93E-12 | -0.158 |     | <i>P2RY10</i>       | TSS1500 |
| cg03793368 | X  | 141,293,344 | 1E-05    | -0.301 | -0.260 |          |        |     | <i>MAGEC2</i>       | TSS1500 |
| cg27121309 | 11 | 76,731,589  | 6.51E-10 | -0.301 | -0.318 |          |        |     | <i>ACER3</i>        | 3'UTR   |
| cg03300549 | 9  | 32,781,469  | 2.77E-08 | -0.301 | -0.259 |          |        |     |                     |         |
| cg14411804 | 2  | 56,420,171  | 0.006065 | -0.301 | -0.309 |          |        |     | <i>CCDC85A</i>      | Body    |
| cg07364729 | 13 | 112,786,612 | 0.012446 | -0.301 | -0.118 |          |        |     |                     |         |
| cg17514199 | 1  | 238,051,451 | 9.93E-06 | -0.301 | -0.269 |          |        |     | <i>LOC100130331</i> | Body    |
| cg27189967 | X  | 151,821,766 | 0.000854 | -0.301 | -0.245 |          |        |     | <i>GABRQ</i>        | 3'UTR   |
| cg12445309 | 11 | 131,615,437 | 0.000295 | -0.301 | -0.265 |          |        |     | <i>NTM</i>          | Body    |
| cg25135457 | 17 | 40,715,244  | 2.4E-14  | -0.301 | -0.284 |          |        |     | <i>COASY</i>        | 1stExon |
| cg13917433 | 3  | 52,722,445  | 2.3E-08  | -0.301 | -0.290 |          |        |     | <i>GNL3</i>         | Body    |
| cg25313468 | 4  | 57,773,308  | 5.42E-10 | -0.301 | -0.296 |          |        |     | <i>REST</i>         | TSS1500 |
| cg16373000 | 7  | 1,086,220   | 1.88E-05 | -0.302 | -0.209 |          |        |     | <i>C7orf50</i>      | Body    |
| cg03545548 | 3  | 167,320,581 | 3.88E-05 | -0.302 | -0.302 |          |        |     | <i>WDR49</i>        | Body    |
| cg06790053 | 1  | 246,939,453 | 9.46E-08 | -0.302 | -0.310 |          |        |     |                     |         |
| cg14757492 | 19 | 19,029,194  | 5.77E-08 | -0.302 | -0.322 |          |        |     | <i>COPE</i>         | Body    |
| cg13720048 | 18 | 55,466,071  | 1.55E-05 | -0.302 | -0.267 |          |        |     |                     |         |
| cg01593385 | 4  | 155,534,149 | 4.83E-09 | -0.302 | -0.265 | 3.16E-15 | -0.229 |     | <i>FGG</i>          | TSS1500 |
| cg07468956 | 17 | 80,289,701  | 1.24E-06 | -0.302 | -0.287 |          |        |     | <i>SECTM1</i>       | 5'UTR   |
| cg23397909 | 7  | 921,092     | 3.32E-06 | -0.302 | -0.333 |          |        |     | <i>C7orf20</i>      | Body    |
| cg06943912 | 19 | 10,715,612  | 0.001024 | -0.302 | -0.199 |          |        |     | <i>SLC44A2</i>      | Body    |
| cg03522247 | 12 | 33,205,429  | 0.01264  | -0.302 | -0.215 |          |        |     |                     |         |
| cg01015899 | 12 | 120,663,812 | 2.1E-09  | -0.302 | -0.293 |          |        | Yes | <i>PXN</i>          | 5'UTR   |
| cg01687040 | 12 | 55,043,559  | 0.000313 | -0.302 | -0.225 |          |        |     | <i>DCD</i>          | TSS1500 |
| cg16639172 | 16 | 31,833,471  | 0.000992 | -0.302 | -0.254 |          |        |     |                     |         |

|            |    |             |          |        |        |          |        |     |                  |         |
|------------|----|-------------|----------|--------|--------|----------|--------|-----|------------------|---------|
| cg22936884 | 5  | 663,787     | 0.001033 | -0.302 | -0.189 |          |        |     | <i>TPPP</i>      | 3'UTR   |
| cg04741516 | 14 | 99,786,208  | 0.018102 | -0.302 | -0.194 |          |        |     |                  |         |
| cg07277892 | 4  | 178,158,833 | 0.000253 | -0.302 | -0.302 |          |        |     |                  |         |
| cg16411279 | 5  | 54,826,768  | 1.35E-18 | -0.302 | -0.282 |          |        |     | <i>PPAP2A</i>    | Body    |
| cg24417779 | 7  | 78,588,037  | 0.000339 | -0.302 | -0.232 |          |        | Yes | <i>MAGI2</i>     | Body    |
| cg27070951 | 15 | 92,532,867  | 2.6E-05  | -0.302 | -0.229 |          |        |     | <i>SLCO3A1</i>   | Body    |
| cg02954324 | 3  | 67,045,043  | 6.32E-09 | -0.302 | -0.294 |          |        |     |                  |         |
| cg09411231 | 1  | 186,159,350 | 1.58E-11 | -0.303 | -0.303 |          |        |     | <i>MIR548F1</i>  | Body    |
| cg03308240 | 16 | 34,403,971  | 0.000988 | -0.303 | -0.207 |          |        |     | <i>UBE2MP1</i>   | Body    |
| cg18741908 | 3  | 169,756,818 | 1.99E-13 | -0.303 | -0.323 | 3.21E-29 | -0.197 |     | <i>GPR160</i>    | 5'UTR   |
| cg12942878 | 3  | 192,960,632 | 0.00022  | -0.303 | -0.236 |          |        |     | <i>MGC2889</i>   | Body    |
| cg17861424 | 4  | 17,318,093  | 0.000313 | -0.303 | -0.261 |          |        |     |                  |         |
| cg00478884 | 14 | 20,978,888  | 1.89E-09 | -0.303 | -0.318 |          |        |     | <i>RNASE10</i>   | 1stExon |
| cg09305491 | 16 | 24,151,191  | 7.23E-05 | -0.303 | -0.249 |          |        |     | <i>PRKCB</i>     | Body    |
| cg14355941 | 14 | 101,526,485 | 0.005722 | -0.303 | -0.270 |          |        |     | <i>MIR496</i>    | TSS1500 |
| cg14959260 | 4  | 9,917,839   | 5.22E-08 | -0.303 | -0.273 |          |        |     | <i>SLC2A9</i>    | Body    |
| cg21029504 | 22 | 50,028,390  | 0.001189 | -0.303 | -0.216 |          |        |     | <i>C22orf34</i>  | Body    |
| cg27628839 | 1  | 155,534,509 | 4.3E-16  | -0.303 | -0.304 |          |        |     |                  |         |
| cg06907356 | 21 | 45,664,138  | 1.61E-13 | -0.303 | -0.322 |          |        |     |                  |         |
| cg03577250 | 20 | 31,261,994  | 1.6E-08  | -0.303 | -0.222 |          |        |     | <i>LOC284805</i> | TSS1500 |
| cg24822127 | X  | 150,884,331 | 1.98E-06 | -0.303 | -0.295 |          |        |     | <i>FATE1</i>     | TSS200  |
| cg04914574 | 14 | 99,183,876  | 4.19E-05 | -0.303 | -0.276 |          |        |     | <i>C14orf177</i> | 3'UTR   |
| cg12762600 | 15 | 90,191,154  | 5.4E-10  | -0.303 | -0.237 |          |        |     | <i>KIF7</i>      | Body    |
| cg03369828 | X  | 49,460,408  | 0.002857 | -0.303 | -0.212 |          |        |     | <i>PAGE1</i>     | 5'UTR   |
| cg19895579 | 8  | 89,437,704  | 5.2E-06  | -0.303 | -0.226 |          |        |     |                  |         |
| cg06577876 | 7  | 32,336,173  | 3.07E-05 | -0.303 | -0.256 |          |        |     |                  |         |
| cg09450200 | 7  | 148,903,195 | 1.02E-06 | -0.303 | -0.306 |          |        |     | <i>ZNF282</i>    | Body    |
| cg22187125 | 19 | 58,565,865  | 2.03E-06 | -0.303 | -0.235 |          |        |     | <i>ZSCAN1</i>    | 3'UTR   |
| cg09361469 | 10 | 5,688,620   | 2.86E-10 | -0.303 | -0.313 |          |        |     | <i>ASB13</i>     | Body    |
| cg06870560 | X  | 115,009,194 | 9.95E-05 | -0.303 | -0.269 |          |        |     |                  |         |
| cg03825810 | 3  | 38,888,170  | 0.000198 | -0.303 | -0.281 |          |        |     | <i>SCN11A</i>    | 3'UTR   |
| cg27373387 | 2  | 10,592,414  | 1.02E-09 | -0.303 | -0.299 |          |        |     |                  |         |
| cg14269525 | 14 | 98,214,031  | 1.22E-07 | -0.303 | -0.304 |          |        |     |                  |         |
| cg07024656 | 10 | 42,970,618  | 0.008123 | -0.303 | -0.184 |          |        |     | <i>LOC84856</i>  | TSS1500 |

|            |    |             |          |        |        |  |  |     |         |         |
|------------|----|-------------|----------|--------|--------|--|--|-----|---------|---------|
| cg07138024 | 7  | 25,608,323  | 1.45E-05 | -0.303 | -0.260 |  |  |     |         |         |
| cg15628586 | 4  | 176,068,206 | 0.024386 | -0.303 | -0.168 |  |  |     |         |         |
| cg16774755 | 16 | 86,421,946  | 0.000262 | -0.303 | -0.262 |  |  |     |         |         |
| cg06554192 | 18 | 75,691,425  | 8.46E-05 | -0.303 | -0.223 |  |  |     |         |         |
| cg21205031 | 2  | 32,502,699  | 2.57E-09 | -0.303 | -0.340 |  |  |     | YIPF4   | TSS1500 |
| cg09108394 | 16 | 23,850,106  | 0.000128 | -0.303 | -0.307 |  |  |     | PRKCB   | Body    |
| cg15675123 | 5  | 12,623,177  | 0.001655 | -0.303 | -0.217 |  |  |     |         |         |
| cg10668195 | 7  | 54,768,889  | 3.84E-05 | -0.303 | -0.257 |  |  |     |         |         |
| cg15816712 | 8  | 72,630,628  | 0.000115 | -0.303 | -0.327 |  |  |     |         |         |
| cg18186771 | 17 | 76,993,506  | 7.48E-10 | -0.303 | -0.296 |  |  |     | CANT1   | Body    |
| cg02830744 | X  | 27,481,149  | 0.001089 | -0.303 | -0.220 |  |  |     | SMEK3P  | Body    |
| cg15175266 | 5  | 22,854,704  | 3.34E-11 | -0.303 | -0.295 |  |  |     | CDH12   | TSS1500 |
| cg13692105 | 9  | 138,592,489 | 1.85E-06 | -0.304 | -0.295 |  |  |     | SOHLH1  | TSS1500 |
| cg07737175 | 13 | 112,770,897 | 0.000362 | -0.304 | -0.196 |  |  |     |         |         |
| cg12448265 | 2  | 119,197,657 | 6.58E-06 | -0.304 | -0.325 |  |  | Yes |         |         |
| cg08187057 | 11 | 119,180,122 | 3.15E-05 | -0.304 | -0.299 |  |  |     | MCAM    | 3'UTR   |
| cg14136086 | 21 | 46,863,924  | 2.52E-06 | -0.304 | -0.237 |  |  |     | COL18A1 | Body    |
| cg17851868 | 2  | 58,748,306  | 4.5E-10  | -0.304 | -0.322 |  |  |     |         |         |
| cg03993839 | 16 | 55,851,398  | 0.000141 | -0.304 | -0.240 |  |  |     | CES1    | Body    |
| cg20910424 | 11 | 87,284,530  | 4.08E-08 | -0.304 | -0.307 |  |  |     |         |         |
| cg23325413 | 5  | 4,773,407   | 3.1E-05  | -0.304 | -0.265 |  |  |     |         |         |
| cg06427571 | 4  | 189,863,116 | 1.45E-05 | -0.304 | -0.271 |  |  |     |         |         |
| cg00981443 | 1  | 152,681,163 | 0.001929 | -0.304 | -0.277 |  |  |     | LCE4A   | TSS1500 |
| cg05944004 | 20 | 59,546,092  | 1.65E-05 | -0.304 | -0.292 |  |  |     |         |         |
| cg11090458 | 7  | 73,672,935  | 2.82E-11 | -0.304 | -0.312 |  |  |     |         |         |
| cg13583523 | 5  | 24,764,190  | 1.42E-07 | -0.304 | -0.275 |  |  |     |         |         |
| cg19035908 | 19 | 33,765,633  | 4.18E-10 | -0.304 | -0.289 |  |  |     |         |         |
| cg07280182 | 22 | 49,810,275  | 0.004418 | -0.304 | -0.213 |  |  |     |         |         |
| cg25232510 | 8  | 134,306,223 | 2.22E-11 | -0.304 | -0.317 |  |  |     | NDRG1   | 5'UTR   |
| cg17219660 | 1  | 202,091,880 | 1.5E-08  | -0.304 | -0.230 |  |  |     | GPR37L1 | TSS200  |
| cg09478103 | 10 | 44,101,496  | 6.54E-16 | -0.304 | -0.273 |  |  |     | ZNF485  | TSS1500 |
| cg08446824 | 4  | 1,720,184   | 3.82E-12 | -0.304 | -0.296 |  |  |     | TMEM129 | Body    |
| cg05111081 | 15 | 92,425,496  | 0.000937 | -0.304 | -0.210 |  |  |     | SLCO3A1 | Body    |
| cg13173045 | 11 | 55,872,882  | 0.000632 | -0.304 | -0.245 |  |  |     | OR8H2   | 1stExon |

|            |    |             |          |        |        |          |        |     |                  |         |
|------------|----|-------------|----------|--------|--------|----------|--------|-----|------------------|---------|
| cg10440696 | 11 | 5,809,911   | 0.00026  | -0.304 | -0.281 |          |        |     | <i>OR52N1</i>    | 1stExon |
| cg19378892 | 1  | 159,283,536 | 0.001028 | -0.304 | -0.295 |          |        |     | <i>OR10J3</i>    | 1stExon |
| cg26550835 | X  | 107,017,362 | 0.017801 | -0.304 | -0.269 |          |        |     | <i>TSC22D3</i>   | Body    |
| cg19946742 | 10 | 134,997,074 | 9.72E-06 | -0.304 | -0.238 |          |        |     | <i>KNDC1</i>     | Body    |
| cg08154066 | 16 | 86,327,669  | 0.005161 | -0.304 | -0.181 |          |        |     |                  |         |
| cg03557916 | 13 | 114,109,949 | 0.022142 | -0.304 | -0.400 |          |        |     |                  |         |
| cg07457375 | 6  | 33,151,008  | 2.64E-20 | -0.304 | -0.285 |          |        |     | <i>COL11A2</i>   | Body    |
| cg18462653 | 20 | 29,978,176  | 1.33E-08 | -0.304 | -0.306 | 1.95E-20 | -0.220 |     | <i>DEFB119</i>   | Body    |
| cg06334737 | 11 | 61,976,195  | 2.26E-14 | -0.304 | -0.281 |          |        |     | <i>SCGB2A1</i>   | 1stExon |
| cg06842116 | 22 | 17,182,794  | 0.001152 | -0.304 | -0.303 |          |        |     |                  |         |
| cg01454538 | 2  | 1,691,165   | 1.69E-14 | -0.304 | -0.299 |          |        |     | <i>PXDN</i>      | Body    |
| cg20470223 | 4  | 189,860,886 | 0.000155 | -0.305 | -0.230 |          |        |     |                  |         |
| cg05922384 | 1  | 196,702,931 | 0.002067 | -0.305 | -0.276 |          |        |     | <i>CFH</i>       | Body    |
| cg04398282 | 4  | 68,424,256  | 5.98E-10 | -0.305 | -0.283 | 4.99E-17 | -0.193 |     | <i>STAP1</i>     | TSS200  |
| cg07830134 | 16 | 1,249,204   | 3.72E-07 | -0.305 | -0.297 |          |        |     | <i>CACNA1H</i>   | Body    |
| cg11388802 | 1  | 181,577,847 | 0.000192 | -0.305 | -0.343 |          |        |     | <i>CACNA1E</i>   | Body    |
| cg17057086 | 8  | 133,456,013 | 0.006577 | -0.305 | -0.287 |          |        |     | <i>KCNQ3</i>     | Body    |
| cg00512484 | 18 | 5,199,989   | 3.03E-08 | -0.305 | -0.288 |          |        |     |                  |         |
| cg07769622 | X  | 27,481,498  | 0.003648 | -0.305 | -0.229 |          |        |     | <i>SMEK3P</i>    | TSS200  |
| cg06444207 | 1  | 155,233,025 | 4.88E-19 | -0.305 | -0.275 |          |        |     | <i>SCAMP3</i>    | TSS1500 |
| cg20876987 | 6  | 28,553,998  | 2.24E-07 | -0.305 | -0.261 |          |        |     | <i>SCAND3</i>    | Body    |
| cg04739648 | 5  | 25,907,524  | 3.73E-08 | -0.305 | -0.292 |          |        |     |                  |         |
| cg05292289 | 22 | 49,695,797  | 0.012103 | -0.305 | -0.168 |          |        |     |                  |         |
| cg14842771 | 7  | 142,558,879 | 1.24E-09 | -0.305 | -0.268 |          |        |     | <i>EPHB6</i>     | 5'UTR   |
| cg04553632 | 10 | 134,929,181 | 0.004951 | -0.305 | -0.184 |          |        |     | <i>GPR123</i>    | Body    |
| cg18450582 | 7  | 95,546,539  | 1.16E-08 | -0.305 | -0.317 |          |        |     | <i>DYNC1I1</i>   | Body    |
| cg07208057 | 2  | 84,516,404  | 0.000555 | -0.305 | -0.281 |          |        |     | <i>LOC388965</i> | TSS1500 |
| cg04923174 | 1  | 158,549,277 | 2.98E-11 | -0.305 | -0.288 |          |        |     | <i>OR10X1</i>    | 1stExon |
| cg02409722 | 4  | 140,429,978 | 2.26E-07 | -0.305 | -0.278 |          |        |     | <i>SETD7</i>     | 3'UTR   |
| cg03496520 | 14 | 28,732,636  | 7.91E-08 | -0.305 | -0.290 |          |        |     |                  |         |
| cg18991165 | 5  | 143,847,362 | 4.67E-09 | -0.305 | -0.315 |          |        |     | <i>KCTD16</i>    | Body    |
| cg19101566 | 6  | 46,623,767  | 1.15E-10 | -0.305 | -0.288 |          |        | Yes | <i>SLC25A27</i>  | Body    |
| cg23724738 | 1  | 152,538,380 | 0.000249 | -0.305 | -0.284 |          |        |     | <i>LCE3E</i>     | 3'UTR   |
| cg23470538 | 5  | 4,295,348   | 0.00117  | -0.305 | -0.209 |          |        |     |                  |         |

|            |    |             |          |        |        |          |        |  |                  |         |
|------------|----|-------------|----------|--------|--------|----------|--------|--|------------------|---------|
| cg11278291 | 13 | 97,638,697  | 1.48E-05 | -0.305 | -0.302 |          |        |  | <i>OXGR1</i>     | 3'UTR   |
| cg26829418 | 2  | 103,238,066 | 1.38E-13 | -0.306 | -0.276 |          |        |  | <i>SLC9A2</i>    | Body    |
| cg06038358 | 2  | 128,176,007 | 1.47E-05 | -0.306 | -0.210 |          |        |  | <i>PROC</i>      | 5'UTR   |
| cg14826797 | 5  | 33,444,867  | 5.13E-13 | -0.306 | -0.284 |          |        |  | <i>TARS</i>      | Body    |
| cg22866565 | 4  | 86,718,190  | 2.14E-13 | -0.306 | -0.283 |          |        |  | <i>ARHGAP24</i>  | Body    |
| cg10152447 | 4  | 16,324,929  | 1.57E-06 | -0.306 | -0.293 |          |        |  |                  |         |
| cg20543478 | 3  | 77,147,279  | 0.000233 | -0.306 | -0.270 |          |        |  | <i>ROBO2</i>     | 1stExon |
| cg05887869 | 5  | 9,738,648   | 0.00582  | -0.306 | -0.246 |          |        |  | <i>LOC285692</i> | Body    |
| cg09966455 | 20 | 61,930,265  | 0.017423 | -0.306 | -0.198 |          |        |  | <i>COL20A1</i>   | Body    |
| cg19787070 | X  | 4,381,263   | 9.75E-05 | -0.306 | -0.323 |          |        |  |                  |         |
| cg00971508 | 15 | 98,291,886  | 0.000802 | -0.306 | -0.329 |          |        |  | <i>LOC91948</i>  | Body    |
| cg00593243 | 5  | 172,196,153 | 2.34E-05 | -0.306 | -0.268 |          |        |  | <i>DUSP1</i>     | Body    |
| cg03789606 | X  | 98,999,604  | 2.78E-06 | -0.306 | -0.308 |          |        |  | <i>LOC442459</i> | Body    |
| cg13475704 | 17 | 77,810,269  | 1.01E-13 | -0.306 | -0.299 |          |        |  | <i>CBX4</i>      | Body    |
| cg21715599 | 15 | 92,463,554  | 0.000558 | -0.306 | -0.237 |          |        |  | <i>SLCO3A1</i>   | Body    |
| cg24603439 | 7  | 15,436,238  | 0.000608 | -0.306 | -0.182 |          |        |  | <i>TMEM195</i>   | Body    |
| cg09705798 | 5  | 160,048,394 | 1.07E-05 | -0.306 | -0.345 |          |        |  | <i>ATP10B</i>    | Body    |
| cg22396979 | 8  | 143,915,919 | 1.32E-11 | -0.306 | -0.234 |          |        |  | <i>GML</i>       | TSS1500 |
| cg17940113 | 15 | 27,790,720  | 3.83E-15 | -0.306 | -0.306 |          |        |  |                  |         |
| cg22067676 | 6  | 126,281,331 | 8.15E-07 | -0.306 | -0.226 |          |        |  | <i>HINT3</i>     | Body    |
| cg17915922 | 7  | 6,911,211   | 6.62E-09 | -0.306 | -0.289 |          |        |  |                  |         |
| cg22155281 | 4  | 118,007,206 | 1.17E-12 | -0.306 | -0.314 |          |        |  | <i>TRAM1L1</i>   | TSS1500 |
| cg09358975 | 16 | 24,372,426  | 6.09E-06 | -0.306 | -0.226 |          |        |  | <i>CACNG3</i>    | Body    |
| cg25748764 | 20 | 31,261,814  | 2.24E-08 | -0.306 | -0.239 |          |        |  | <i>LOC284805</i> | TSS200  |
| cg01942751 | 2  | 240,031,635 | 2.64E-11 | -0.306 | -0.293 |          |        |  | <i>HDAC4</i>     | Body    |
| cg25230917 | 3  | 66,527,285  | 1E-08    | -0.306 | -0.315 |          |        |  | <i>LRIG1</i>     | Body    |
| cg09781994 | 4  | 111,548,118 | 0.013378 | -0.306 | -0.222 |          |        |  | <i>PITX2</i>     | Body    |
| cg10207553 | 15 | 65,277,977  | 4.99E-34 | -0.306 | -0.290 |          |        |  | <i>SPG21</i>     | 5'UTR   |
| cg26980111 | 8  | 132,321,917 | 2.27E-07 | -0.306 | -0.298 |          |        |  |                  |         |
| cg10133610 | 6  | 3,226,289   | 7.94E-10 | -0.306 | -0.284 |          |        |  | <i>TUBB2B</i>    | Body    |
| cg10819004 | 8  | 63,403,502  | 0.000264 | -0.306 | -0.323 |          |        |  | <i>NKAIN3</i>    | Body    |
| cg12447911 | 15 | 95,515,060  | 4.98E-05 | -0.306 | -0.276 |          |        |  |                  |         |
| cg22712983 | 2  | 219,187,374 | 0.000222 | -0.306 | -0.278 |          |        |  | <i>PNKD</i>      | TSS1500 |
| cg12547930 | 20 | 44,168,753  | 3.38E-09 | -0.307 | -0.325 | 1.57E-25 | -0.187 |  | <i>WFDC6</i>     | TSS1500 |

|            |    |             |          |        |        |  |  |  |                  |         |
|------------|----|-------------|----------|--------|--------|--|--|--|------------------|---------|
| cg14329275 | 17 | 77,809,912  | 1.42E-14 | -0.307 | -0.292 |  |  |  | <i>CBX4</i>      | Body    |
| cg15977685 | 6  | 168,743,593 | 6.26E-05 | -0.307 | -0.297 |  |  |  |                  |         |
| cg08871573 | X  | 3,227,443   | 0.000705 | -0.307 | -0.221 |  |  |  | <i>MXRA5</i>     | 3'UTR   |
| cg11166197 | X  | 151,561,584 | 3.93E-09 | -0.307 | -0.247 |  |  |  | <i>GABRA3</i>    | 5'UTR   |
| cg04841371 | 1  | 152,958,102 | 0.00023  | -0.307 | -0.236 |  |  |  | <i>SPRR1A</i>    | 3'UTR   |
| cg10789601 | 5  | 176,088,586 | 2.34E-08 | -0.307 | -0.318 |  |  |  |                  |         |
| cg12282588 | 1  | 157,737,828 | 5.17E-05 | -0.307 | -0.299 |  |  |  | <i>FCRL2</i>     | Body    |
| cg27026371 | 11 | 123,886,141 | 4.82E-05 | -0.307 | -0.262 |  |  |  | <i>OR10G4</i>    | TSS200  |
| cg04642105 | 4  | 1,239,119   | 6.35E-11 | -0.307 | -0.276 |  |  |  | <i>CTBP1</i>     | Body    |
| cg15907819 | 5  | 27,119,093  | 0.000319 | -0.307 | -0.234 |  |  |  |                  |         |
| cg19449594 | 11 | 122,292,868 | 7.19E-05 | -0.307 | -0.334 |  |  |  |                  |         |
| cg20985269 | 1  | 158,576,809 | 3.48E-12 | -0.307 | -0.306 |  |  |  | <i>OR10Z1</i>    | 1stExon |
| cg18280126 | 11 | 57,235,389  | 0.000269 | -0.307 | -0.325 |  |  |  | <i>RTN4RL2</i>   | Body    |
| cg06704573 | 8  | 55,527,950  | 0.000794 | -0.307 | -0.250 |  |  |  | <i>RP1</i>       | TSS1500 |
| cg26150582 | 12 | 131,605,488 | 0.008097 | -0.307 | -0.169 |  |  |  | <i>GPR133</i>    | Body    |
| cg05736424 | 2  | 127,646,592 | 0.000508 | -0.307 | -0.288 |  |  |  |                  |         |
| cg14338073 | 10 | 44,359,161  | 0.008874 | -0.307 | -0.316 |  |  |  |                  |         |
| cg14166701 | 14 | 104,574,715 | 1.85E-09 | -0.307 | -0.276 |  |  |  | <i>ASPG</i>      | Body    |
| cg26377880 | 5  | 7,851,487   | 2.17E-10 | -0.307 | -0.316 |  |  |  | <i>C5orf49</i>   | TSS1500 |
| cg05505763 | 13 | 103,020,269 | 0.014457 | -0.307 | -0.234 |  |  |  | <i>FGF14</i>     | Body    |
| cg22340475 | 8  | 55,529,845  | 0.000297 | -0.308 | -0.248 |  |  |  | <i>RP1</i>       | 5'UTR   |
| cg15088574 | 1  | 4,848,991   | 4.43E-05 | -0.308 | -0.249 |  |  |  |                  |         |
| cg26974035 | 8  | 128,494,679 | 5.1E-05  | -0.308 | -0.187 |  |  |  | <i>LOC727677</i> | TSS1500 |
| cg16292586 | 3  | 16,969,867  | 0.000384 | -0.308 | -0.250 |  |  |  | <i>PLCL2</i>     | Body    |
| cg18142906 | 3  | 167,293,814 | 1.4E-13  | -0.308 | -0.281 |  |  |  | <i>WDR49</i>     | Body    |
| cg22318821 | 12 | 34,480,428  | 3.74E-05 | -0.308 | -0.246 |  |  |  |                  |         |
| cg21919556 | 3  | 169,755,036 | 1.69E-08 | -0.308 | -0.330 |  |  |  | <i>GPR160</i>    | TSS1500 |
| cg16408865 | 12 | 69,753,119  | 1.16E-10 | -0.308 | -0.303 |  |  |  | <i>YEATS4</i>    | TSS1500 |
| cg10018216 | 16 | 1,487,596   | 1.13E-29 | -0.308 | -0.295 |  |  |  | <i>CCDC154</i>   | Body    |
| cg13054007 | 13 | 81,018,323  | 4.4E-05  | -0.308 | -0.334 |  |  |  |                  |         |
| cg19639967 | 1  | 198,907,662 | 0.001817 | -0.308 | -0.249 |  |  |  |                  |         |
| cg21132536 | 20 | 33,465,180  | 0.000593 | -0.308 | -0.239 |  |  |  | <i>ACSS2</i>     | Body    |
| cg04560741 | 20 | 37,056,075  | 6.34E-12 | -0.308 | -0.255 |  |  |  | <i>LOC388796</i> | Body    |
| cg03052794 | 19 | 908,894     | 1.86E-16 | -0.308 | -0.271 |  |  |  | <i>C19orf22</i>  | Body    |

|            |    |             |          |        |        |           |        |     |                 |         |
|------------|----|-------------|----------|--------|--------|-----------|--------|-----|-----------------|---------|
| cg09770410 | 6  | 155,803,118 | 1.32E-05 | -0.308 | -0.270 |           |        | Yes |                 |         |
| cg11862144 | 18 | 61,143,961  | 0.000429 | -0.308 | -0.241 |           |        |     | <i>SERPINB5</i> | TSS200  |
| cg00150025 | 15 | 42,448,079  | 1.01E-06 | -0.308 | -0.282 |           |        |     | <i>PLA2G4F</i>  | Body    |
| cg10063845 | 2  | 80,363,347  | 0.000404 | -0.308 | -0.262 |           |        |     | <i>CTNNA2</i>   | Body    |
| cg17475172 | 8  | 87,878,728  | 0.000468 | -0.308 | -0.222 |           |        |     | <i>CNBD1</i>    | 1stExon |
| cg23305899 | 14 | 101,539,489 | 8.78E-08 | -0.308 | -0.320 |           |        |     |                 |         |
| cg22487322 | 6  | 137,366,322 | 2.24E-09 | -0.308 | -0.273 | 0.0000122 | -0.130 |     | <i>IL20RA</i>   | TSS200  |
| cg24639690 | 6  | 50,166,008  | 0.001301 | -0.309 | -0.157 |           |        |     |                 |         |
| cg15985157 | 6  | 132,468,790 | 0.000689 | -0.309 | -0.307 |           |        |     |                 |         |
| cg07041488 | 16 | 24,266,347  | 0.000179 | -0.309 | -0.235 |           |        |     | <i>CACNG3</i>   | TSS1500 |
| cg20672708 | 20 | 30,696,827  | 4.26E-15 | -0.309 | -0.305 |           |        |     | <i>TM9SF4</i>   | TSS1500 |
| cg22548714 | 4  | 100,573,330 | 4.98E-05 | -0.309 | -0.283 |           |        |     |                 |         |
| cg02626307 | 1  | 156,305,725 | 1.01E-17 | -0.309 | -0.302 |           |        |     | <i>CCT3</i>     | Body    |
| cg15952487 | 1  | 158,300,733 | 2.61E-06 | -0.309 | -0.319 | 1.28E-15  | -0.147 |     | <i>CD1B</i>     | Body    |
| cg01035170 | 5  | 7,851,681   | 2.94E-15 | -0.309 | -0.299 |           |        |     | <i>C5orf49</i>  | TSS1500 |
| cg17689601 | 10 | 83,651,137  | 0.003702 | -0.309 | -0.198 |           |        |     | <i>NRG3</i>     | Body    |
| cg18184218 | 10 | 24,755,438  | 1.4E-18  | -0.309 | -0.325 |           |        |     | <i>KIAA1217</i> | Body    |
| cg00830435 | 1  | 2,918,526   | 0.003605 | -0.309 | -0.169 |           |        |     |                 |         |
| cg01821906 | X  | 103,268,245 | 0.001547 | -0.309 | -0.226 |           |        |     | <i>H2BFWT</i>   | 5'UTR   |
| cg15617853 | 13 | 47,669,359  | 0.000317 | -0.309 | -0.324 |           |        |     |                 |         |
| cg07090653 | 1  | 152,784,914 | 0.000996 | -0.309 | -0.304 |           |        |     | <i>LCE1B</i>    | 1stExon |
| cg25339449 | X  | 146,342,079 | 8.68E-05 | -0.309 | -0.282 |           |        |     | <i>MIR509-3</i> | Body    |
| cg27499850 | 16 | 73,127,462  | 0.00716  | -0.309 | -0.148 |           |        |     | <i>HTA</i>      | Body    |
| cg07725829 | 12 | 88,186,400  | 2.15E-05 | -0.309 | -0.341 |           |        |     |                 |         |
| cg08333835 | 8  | 113,656,015 | 1E-08    | -0.309 | -0.295 |           |        |     | <i>CSMD3</i>    | Body    |
| cg14067657 | 20 | 56,248,127  | 7.51E-05 | -0.309 | -0.327 |           |        |     | <i>PMEPA1</i>   | 5'UTR   |
| cg06611109 | 3  | 147,680,482 | 3.11E-05 | -0.309 | -0.276 |           |        |     |                 |         |
| cg19718360 | 1  | 160,550,647 | 2.79E-13 | -0.309 | -0.291 |           |        |     | <i>CD84</i>     | TSS1500 |
| cg00820961 | 9  | 138,624,832 | 1.11E-05 | -0.309 | -0.246 |           |        |     | <i>KCNT1</i>    | Body    |
| cg20948923 | 14 | 28,081,449  | 2.86E-05 | -0.309 | -0.257 |           |        |     |                 |         |
| cg04115702 | 17 | 77,386,380  | 4.78E-05 | -0.309 | -0.247 |           |        |     | <i>HRNBP3</i>   | 5'UTR   |
| cg12400519 | 12 | 127,209,583 | 7.2E-05  | -0.309 | -0.304 |           |        |     |                 |         |
| cg20608990 | 2  | 202,097,607 | 3.07E-06 | -0.309 | -0.353 |           |        |     | <i>CASP8</i>    | TSS1500 |
| cg11139864 | 16 | 33,730,558  | 3.2E-06  | -0.309 | -0.260 |           |        |     |                 |         |



|            |    |             |          |        |        |          |        |     |                 |         |
|------------|----|-------------|----------|--------|--------|----------|--------|-----|-----------------|---------|
| cg03469655 | 6  | 123,385,000 | 8.63E-09 | -0.309 | -0.291 |          |        |     | <i>CLVS2</i>    | 3'UTR   |
| cg23820589 | 1  | 2,014,244   | 5.91E-13 | -0.309 | -0.314 |          |        |     | <i>PRKCZ</i>    | Body    |
| cg16322276 | 11 | 104,035,761 | 3.19E-05 | -0.309 | -0.306 |          |        |     | <i>PDGFD</i>    | TSS1500 |
| cg11413443 | 4  | 155,505,887 | 0.000259 | -0.309 | -0.252 |          |        |     | <i>FGA</i>      | Body    |
| cg12059258 | 10 | 107,899,066 | 0.000413 | -0.310 | -0.290 |          |        |     |                 |         |
| cg10154971 | 16 | 59,270,585  | 0.000421 | -0.310 | -0.279 |          |        |     |                 |         |
| cg17482224 | 1  | 225,116,995 | 5.17E-08 | -0.310 | -0.345 |          |        | Yes | <i>DNAH14</i>   | TSS1500 |
| cg02495250 | 16 | 82,735,595  | 0.000101 | -0.310 | -0.320 |          |        |     | <i>CDH13</i>    | Body    |
| cg27168858 | 1  | 55,351,659  | 1.82E-12 | -0.310 | -0.291 |          |        |     | <i>DHCR24</i>   | Body    |
| cg05281206 | 17 | 32,682,770  | 0.00012  | -0.310 | -0.279 |          |        |     | <i>CCL13</i>    | TSS1500 |
| cg06873024 | 1  | 215,130,954 | 0.002637 | -0.310 | -0.346 |          |        |     |                 |         |
| cg26151206 | 1  | 158,390,649 | 0.000133 | -0.310 | -0.266 |          |        |     | <i>OR10K2</i>   | 1stExon |
| cg17661135 | 8  | 32,441,430  | 3.09E-07 | -0.310 | -0.280 |          |        | Yes | <i>NRG1</i>     | Body    |
| cg08564874 | 7  | 34,696,723  | 2.91E-06 | -0.310 | -0.325 |          |        |     | <i>NPSR1</i>    | TSS1500 |
| cg15580304 | 20 | 62,550,734  | 0.046283 | -0.310 | -0.205 |          |        |     | <i>MIR941-3</i> | TSS1500 |
| cg10812889 | 1  | 153,014,310 | 0.000554 | -0.310 | -0.275 |          |        |     | <i>SPRR2D</i>   | TSS1500 |
| cg01899600 | 11 | 5,758,164   | 0.000102 | -0.310 | -0.309 |          |        |     | <i>OR56B1</i>   | 1stExon |
| cg00335802 | 18 | 10,791,505  | 9.75E-05 | -0.310 | -0.345 |          |        |     | <i>FAM38B</i>   | Body    |
| cg10176692 | 11 | 48,238,296  | 6.53E-08 | -0.310 | -0.325 |          |        |     | <i>OR4B1</i>    | TSS200  |
| cg26330275 | 12 | 4,549,503   | 0.005542 | -0.310 | -0.187 |          |        |     | <i>FGF6</i>     | Body    |
| cg26070874 | 7  | 29,648,885  | 0.000165 | -0.310 | -0.240 |          |        |     |                 |         |
| cg27626424 | 1  | 153,232,348 | 0.001591 | -0.310 | -0.253 | 2.45E-14 | -0.166 |     | <i>LOR</i>      | 5'UTR   |
| cg03294961 | 20 | 31,594,014  | 0.000185 | -0.310 | -0.391 |          |        |     | <i>BPIL1</i>    | TSS1500 |
| cg00509996 | 4  | 7,595,397   | 0.000121 | -0.310 | -0.230 |          |        |     | <i>SORCS2</i>   | Body    |
| cg17969902 | 19 | 1,274,584   | 1.22E-07 | -0.310 | -0.301 |          |        |     | <i>CIRBP</i>    | Body    |
| cg05200373 | 6  | 33,170,101  | 2.21E-08 | -0.310 | -0.308 |          |        |     | <i>SLC39A7</i>  | Body    |
| cg21748244 | 5  | 169,713,179 | 5.75E-06 | -0.310 | -0.274 |          |        |     | <i>LCP2</i>     | Body    |
| cg08357627 | 11 | 132,949,126 | 2.73E-16 | -0.310 | -0.285 |          |        |     | <i>OPCML</i>    | Body    |
| cg18162908 | 4  | 186,435,443 | 0.000272 | -0.310 | -0.375 |          |        | Yes | <i>PDLIM3</i>   | Body    |
| cg02695726 | 1  | 155,714,748 | 7.95E-16 | -0.310 | -0.326 |          |        |     | <i>MSTO2P</i>   | TSS1500 |
| cg24828648 | 6  | 63,947,428  | 8.21E-05 | -0.310 | -0.313 |          |        |     |                 |         |
| cg25977938 | 1  | 99,432,192  | 2.46E-06 | -0.310 | -0.288 |          |        |     | <i>LPPR5</i>    | Body    |
| cg07109490 | 1  | 3,342,578   | 4.56E-05 | -0.311 | -0.245 |          |        |     | <i>PRDM16</i>   | Body    |
| cg13979884 | 9  | 74,061,171  | 8.88E-05 | -0.311 | -0.303 |          |        |     |                 |         |

|            |    |             |          |        |        |          |        |     |                  |         |
|------------|----|-------------|----------|--------|--------|----------|--------|-----|------------------|---------|
| cg23634417 | 1  | 156,255,479 | 4.2E-06  | -0.311 | -0.273 |          |        |     | <i>TMEM79</i>    | Body    |
| cg21936464 | 1  | 153,177,032 | 0.000151 | -0.311 | -0.258 |          |        |     | <i>LELP1</i>     | 5'UTR   |
| cg02161039 | 17 | 78,041,529  | 4.57E-05 | -0.311 | -0.352 |          |        |     | <i>CCDC40</i>    | Body    |
| cg06503456 | 16 | 16,124,697  | 1.88E-06 | -0.311 | -0.274 |          |        |     | <i>ABCC1</i>     | Body    |
| cg16562486 | 1  | 2,925,740   | 0.002044 | -0.311 | -0.200 |          |        |     |                  |         |
| cg03881934 | 1  | 152,784,305 | 2.89E-05 | -0.311 | -0.206 |          |        | Yes | <i>LCE1B</i>     | TSS200  |
| cg20410409 | 1  | 158,724,057 | 0.00142  | -0.311 | -0.225 |          |        |     | <i>OR6K6</i>     | TSS1500 |
| cg26810908 | 1  | 238,054,569 | 0.000125 | -0.311 | -0.304 |          |        |     | <i>ZP4</i>       | TSS1500 |
| cg25189608 | 11 | 96,117,844  | 2.61E-10 | -0.311 | -0.302 |          |        |     | <i>CCDC82</i>    | Body    |
| cg00742098 | 16 | 17,911,664  | 8.9E-05  | -0.311 | -0.264 |          |        |     |                  |         |
| cg27093964 | 3  | 8,498,414   | 5.58E-08 | -0.311 | -0.251 |          |        |     |                  |         |
| cg23182836 | 20 | 62,956,898  | 1.31E-05 | -0.311 | -0.237 |          |        |     |                  |         |
| cg13758186 | 2  | 101,959,136 | 2.13E-08 | -0.311 | -0.252 |          |        |     |                  |         |
| cg02722637 | 12 | 4,922,070   | 0.002245 | -0.311 | -0.234 |          |        |     | <i>KCNA6</i>     | 3'UTR   |
| cg14788768 | 5  | 24,170,286  | 0.010316 | -0.311 | -0.221 |          |        |     |                  |         |
| cg15298545 | 16 | 20,816,476  | 2.86E-07 | -0.311 | -0.298 |          |        |     | <i>ERI2</i>      | Body    |
| cg07833342 | 20 | 5,450,926   | 1.73E-05 | -0.311 | -0.238 |          |        |     | <i>LOC643406</i> | TSS1500 |
| cg04975519 | 7  | 156,436,023 | 1.02E-09 | -0.311 | -0.315 |          |        |     | <i>RNF32</i>     | 5'UTR   |
| cg15761405 | 1  | 157,746,405 | 1.76E-09 | -0.311 | -0.305 | 8.83E-09 | -0.199 |     | <i>FCRL2</i>     | Body    |
| cg04721098 | 16 | 24,265,703  | 1.27E-08 | -0.312 | -0.320 |          |        |     | <i>CACNG3</i>    | TSS1500 |
| cg04490211 | 10 | 110,946,662 | 1.59E-07 | -0.312 | -0.277 |          |        |     |                  |         |
| cg07913124 | 12 | 14,217,094  | 1.48E-06 | -0.312 | -0.316 |          |        |     |                  |         |
| cg20366458 | 12 | 56,756,561  | 9.69E-11 | -0.312 | -0.306 |          |        |     | <i>APOF</i>      | 1stExon |
| cg02495306 | X  | 3,227,459   | 0.000179 | -0.312 | -0.254 |          |        |     | <i>MXRA5</i>     | 3'UTR   |
| cg15952370 | 11 | 124,190,997 | 1.18E-12 | -0.312 | -0.295 |          |        |     | <i>OR8D2</i>     | TSS1500 |
| cg01260603 | 6  | 156,203,054 | 0.000127 | -0.312 | -0.204 |          |        |     |                  |         |
| cg27648556 | 8  | 130,641,349 | 8.05E-06 | -0.312 | -0.318 |          |        |     |                  |         |
| cg19335742 | 15 | 40,566,880  | 6.72E-05 | -0.312 | -0.252 |          |        |     | <i>PAK6</i>      | Body    |
| cg14032033 | 1  | 241,371,615 | 0.004211 | -0.312 | -0.232 |          |        |     | <i>RGS7</i>      | Body    |
| cg11810135 | 1  | 157,771,971 | 1.13E-15 | -0.312 | -0.312 |          |        |     | <i>FCRL1</i>     | Body    |
| cg02045745 | 16 | 8,995,607   | 3.4E-06  | -0.312 | -0.293 |          |        |     | <i>USP7</i>      | Body    |
| cg26204448 | 7  | 1,962,212   | 2.5E-14  | -0.312 | -0.312 |          |        |     | <i>MAD1L1</i>    | Body    |
| cg26026598 | 1  | 181,142,292 | 9.62E-05 | -0.312 | -0.299 |          |        |     |                  |         |
| cg26926768 | 12 | 34,528,122  | 1.76E-05 | -0.312 | -0.301 |          |        |     |                  |         |

|            |    |             |          |        |        |  |  |     |                |         |
|------------|----|-------------|----------|--------|--------|--|--|-----|----------------|---------|
| cg15023513 | 15 | 87,667,171  | 3.42E-06 | -0.312 | -0.278 |  |  |     |                |         |
| cg10017293 | 12 | 51,640,305  | 0.005176 | -0.312 | -0.267 |  |  |     | <i>SMAGP</i>   | Body    |
| cg22483095 | 19 | 1,112,679   | 0.000364 | -0.312 | -0.240 |  |  |     | <i>SBNO2</i>   | Body    |
| cg25015813 | 12 | 127,226,110 | 2.1E-05  | -0.312 | -0.271 |  |  |     |                |         |
| cg22588275 | 3  | 167,990,777 | 0.001838 | -0.312 | -0.206 |  |  |     | <i>C3orf50</i> | Body    |
| cg01175394 | 2  | 113,915,885 | 6.13E-17 | -0.312 | -0.329 |  |  |     |                |         |
| cg02725001 | 16 | 86,711,219  | 0.000416 | -0.312 | -0.205 |  |  | Yes |                |         |
| cg03692782 | 19 | 3,982,770   | 0.000336 | -0.312 | -0.254 |  |  |     | <i>EEF2</i>    | Body    |
| cg01088952 | 14 | 47,670,060  | 0.003183 | -0.312 | -0.236 |  |  |     | <i>MDGA2</i>   | Body    |
| cg25384000 | 11 | 55,605,161  | 1.43E-10 | -0.312 | -0.309 |  |  |     | <i>OR5D16</i>  | TSS1500 |
| cg13994408 | X  | 151,307,730 | 7.39E-07 | -0.312 | -0.287 |  |  |     | <i>MAGEA10</i> | TSS1500 |
| cg04527202 | 7  | 48,963,443  | 1.58E-06 | -0.313 | -0.291 |  |  |     | <i>CDC14C</i>  | TSS1500 |
| cg10673265 | 6  | 33,169,975  | 1.75E-16 | -0.313 | -0.314 |  |  |     | <i>SLC39A7</i> | Body    |
| cg24347611 | 8  | 92,611,305  | 0.000379 | -0.313 | -0.289 |  |  |     |                |         |
| cg01837362 | 12 | 34,492,938  | 0.041304 | -0.313 | -0.101 |  |  |     |                |         |
| cg20344040 | 4  | 189,553,390 | 7.5E-10  | -0.313 | -0.315 |  |  |     |                |         |
| cg16755214 | 14 | 54,720,346  | 4.63E-08 | -0.313 | -0.356 |  |  |     |                |         |
| cg22993585 | 5  | 178,220,238 | 1.01E-11 | -0.313 | -0.281 |  |  |     |                |         |
| cg20342458 | 2  | 52,695,221  | 1.06E-06 | -0.313 | -0.334 |  |  |     |                |         |
| cg16916745 | X  | 52,841,366  | 0.001258 | -0.313 | -0.227 |  |  |     | <i>XAGE5</i>   | 5'UTR   |
| cg12917790 | 14 | 93,604,305  | 2.51E-05 | -0.313 | -0.243 |  |  |     |                |         |
| cg21554895 | 13 | 20,703,415  | 0.003784 | -0.313 | -0.283 |  |  |     |                |         |
| cg24877616 | 13 | 112,692,119 | 2.61E-07 | -0.313 | -0.271 |  |  |     |                |         |
| cg13507224 | 1  | 159,284,298 | 4.55E-10 | -0.313 | -0.282 |  |  |     | <i>OR10J3</i>  | 1stExon |
| cg01455178 | 1  | 205,648,187 | 1.34E-17 | -0.313 | -0.309 |  |  |     | <i>SLC45A3</i> | 5'UTR   |
| cg06875616 | 17 | 80,046,055  | 2.27E-06 | -0.313 | -0.242 |  |  |     | <i>FASN</i>    | Body    |
| cg00358516 | 7  | 97,882,212  | 3.77E-07 | -0.313 | -0.272 |  |  |     | <i>TECPR1</i>  | TSS1500 |
| cg11542394 | 15 | 101,419,011 | 0.000866 | -0.313 | -0.218 |  |  |     | <i>ALDH1A3</i> | TSS1500 |
| cg26722429 | 16 | 1,487,615   | 2.84E-09 | -0.313 | -0.286 |  |  |     | <i>CCDC154</i> | Body    |
| cg22644321 | 8  | 126,446,923 | 4.13E-16 | -0.313 | -0.306 |  |  |     | <i>TRIB1</i>   | Body    |
| cg25344322 | 13 | 112,575,014 | 5.07E-05 | -0.313 | -0.192 |  |  |     |                |         |
| cg10966440 | 11 | 132,745,701 | 0.00025  | -0.313 | -0.341 |  |  |     | <i>OPCML</i>   | Body    |
| cg26739149 | 17 | 78,997,350  | 1.33E-08 | -0.313 | -0.273 |  |  |     |                |         |
| cg10021411 | 1  | 159,833,715 | 7.94E-10 | -0.313 | -0.274 |  |  |     | <i>VSIG8</i>   | TSS1500 |

|            |    |             |          |        |        |          |        |     |                   |         |
|------------|----|-------------|----------|--------|--------|----------|--------|-----|-------------------|---------|
| cg05392844 | 2  | 199,639,143 | 0.000299 | -0.313 | -0.274 |          |        |     |                   |         |
| cg10578996 | 19 | 29,455,873  | 1.48E-07 | -0.313 | -0.332 |          |        |     | <i>LOC148145</i>  | TSS200  |
| cg17165055 | 3  | 192,584,827 | 0.001112 | -0.313 | -0.238 |          |        |     | <i>C3orf59</i>    | Body    |
| cg09502207 | 8  | 133,774,222 | 1.13E-05 | -0.313 | -0.260 |          |        |     | <i>TMEM71</i>     | TSS1500 |
| cg07048608 | 1  | 158,581,040 | 2.26E-06 | -0.314 | -0.322 |          |        |     | <i>SPTA1</i>      | 3'UTR   |
| cg12836958 | 4  | 186,132,412 | 9.38E-15 | -0.314 | -0.289 |          |        |     | <i>SNX25</i>      | 5'UTR   |
| cg00317585 | 4  | 188,156,703 | 0.001116 | -0.314 | -0.233 |          |        |     |                   |         |
| cg09327253 | 7  | 31,147,318  | 0.000132 | -0.314 | -0.278 |          |        | Yes |                   |         |
| cg25569880 | 5  | 2,864,005   | 0.01003  | -0.314 | -0.135 |          |        |     |                   |         |
| cg03269363 | 22 | 50,007,725  | 2.55E-06 | -0.314 | -0.323 |          |        |     |                   |         |
| cg21846488 | 1  | 152,680,843 | 0.000358 | -0.314 | -0.293 | 2.03E-13 | -0.205 |     | <i>LCE4A</i>      | TSS1500 |
| cg04303500 | 20 | 59,602,012  | 0.000325 | -0.314 | -0.248 |          |        |     |                   |         |
| cg13672747 | 3  | 13,905,567  | 1.49E-08 | -0.314 | -0.307 |          |        |     | <i>WNT7A</i>      | Body    |
| cg04384208 | 1  | 161,519,396 | 8.42E-09 | -0.314 | -0.288 | 6.73E-20 | -0.215 |     | <i>FCGR3A</i>     | Body    |
| cg05323709 | 19 | 45,753,380  | 6.92E-06 | -0.314 | -0.332 |          |        |     | <i>MARK4</i>      | TSS1500 |
| cg05361290 | 17 | 13,435,461  | 6.84E-06 | -0.314 | -0.276 |          |        |     | <i>HS3ST3A1</i>   | Body    |
| cg05740582 | 8  | 133,573,933 | 0.004722 | -0.314 | -0.232 |          |        |     | <i>HPYR1</i>      | TSS1500 |
| cg11476306 | 8  | 122,273,909 | 8.07E-09 | -0.314 | -0.286 |          |        |     |                   |         |
| cg07320941 | 18 | 76,639,319  | 8.79E-11 | -0.314 | -0.326 |          |        |     |                   |         |
| cg15106030 | 4  | 74,528,435  | 9.56E-12 | -0.314 | -0.301 |          |        |     |                   |         |
| cg01348055 | 16 | 10,272,788  | 3.4E-14  | -0.314 | -0.326 |          |        |     | <i>GRIN2A</i>     | Body    |
| cg22228748 | 1  | 99,385,800  | 0.00153  | -0.314 | -0.347 |          |        |     | <i>LPPR5</i>      | Body    |
| cg24020826 | 8  | 140,630,180 | 0.001078 | -0.314 | -0.223 |          |        |     | <i>KCNK9</i>      | 3'UTR   |
| cg13647892 | 9  | 97,317,179  | 9.66E-10 | -0.314 | -0.281 |          |        |     |                   |         |
| cg02533058 | 6  | 154,363,173 | 9.97E-06 | -0.314 | -0.303 |          |        |     | <i>OPRM1</i>      | Body    |
| cg04444027 | 16 | 8,986,092   | 1.02E-08 | -0.314 | -0.324 |          |        |     | <i>USP7</i>       | 3'UTR   |
| cg26353877 | 1  | 159,557,886 | 6.92E-05 | -0.314 | -0.273 | 9.58E-13 | -0.155 |     | <i>APCS</i>       | Body    |
| cg19341901 | 7  | 149,580,879 | 8.77E-21 | -0.314 | -0.306 |          |        |     |                   |         |
| cg02711020 | 18 | 9,887,994   | 2.13E-15 | -0.314 | -0.295 |          |        |     | <i>TXNDC2</i>     | Body    |
| cg13477812 | 4  | 186,435,506 | 7.31E-05 | -0.314 | -0.384 |          |        |     | <i>PDLIM3</i>     | Body    |
| cg05147143 | 6  | 156,217,095 | 2.85E-07 | -0.315 | -0.301 |          |        |     |                   |         |
| cg01001101 | 7  | 31,726,494  | 0.000309 | -0.315 | -0.284 |          |        |     | <i>C7orf16</i>    | TSS1500 |
| cg14081251 | 9  | 130,675,438 | 6.87E-15 | -0.315 | -0.307 |          |        |     | <i>ST6GALNAC4</i> | 5'UTR   |
| cg19795722 | 11 | 132,080,630 | 0.000386 | -0.315 | -0.321 |          |        |     | <i>NTM</i>        | Body    |

|            |    |             |          |        |        |  |  |     |                  |         |
|------------|----|-------------|----------|--------|--------|--|--|-----|------------------|---------|
| cg00625443 | 15 | 80,997,087  | 1.16E-07 | -0.315 | -0.309 |  |  |     | <i>FAM108C1</i>  | Body    |
| cg08660395 | 6  | 33,169,731  | 2.51E-17 | -0.315 | -0.317 |  |  |     | <i>SLC39A7</i>   | Body    |
| cg04066453 | 17 | 39,943,545  | 3.52E-18 | -0.315 | -0.311 |  |  |     | <i>JUP</i>       | TSS1500 |
| cg01443488 | 1  | 159,557,514 | 1.73E-05 | -0.315 | -0.300 |  |  |     | <i>APCS</i>      | TSS200  |
| cg24788034 | 19 | 2,588,241   | 0.000245 | -0.315 | -0.328 |  |  |     | <i>GNG7</i>      | 5'UTR   |
| cg00796302 | 4  | 106,477,599 | 1.58E-20 | -0.315 | -0.317 |  |  |     | <i>FLJ20184</i>  | Body    |
| cg09235788 | 1  | 111,220,207 | 4.22E-14 | -0.315 | -0.301 |  |  |     |                  |         |
| cg07947745 | 4  | 176,068,376 | 0.000245 | -0.315 | -0.260 |  |  | Yes |                  |         |
| cg21271015 | 1  | 4,542,704   | 2.44E-05 | -0.315 | -0.230 |  |  |     |                  |         |
| cg09829094 | 14 | 48,613,475  | 0.002169 | -0.315 | -0.223 |  |  |     |                  |         |
| cg08778148 | 2  | 188,406,934 | 2.37E-13 | -0.315 | -0.285 |  |  |     | <i>TFPI</i>      | 5'UTR   |
| cg01879506 | 16 | 24,394,920  | 0.000753 | -0.315 | -0.350 |  |  |     |                  |         |
| cg01400541 | 10 | 50,386,612  | 2.66E-09 | -0.316 | -0.231 |  |  |     | <i>C10orf128</i> | Body    |
| cg11397476 | 10 | 19,149,495  | 0.000152 | -0.316 | -0.317 |  |  |     |                  |         |
| cg22924958 | 10 | 125,617,328 | 9.47E-06 | -0.316 | -0.269 |  |  |     | <i>CPXM2</i>     | Body    |
| cg03564727 | 19 | 49,577,206  | 5.94E-07 | -0.316 | -0.294 |  |  |     | <i>KCNA7</i>     | TSS1500 |
| cg08822602 | 6  | 168,743,643 | 4.15E-07 | -0.316 | -0.312 |  |  |     |                  |         |
| cg08123067 | 17 | 81,047,183  | 1.21E-11 | -0.316 | -0.302 |  |  |     | <i>METRNL</i>    | Body    |
| cg14753458 | 3  | 48,751,128  | 1.46E-21 | -0.316 | -0.300 |  |  |     | <i>IP6K2</i>     | 5'UTR   |
| cg09433131 | 8  | 73,480,179  | 0.025437 | -0.316 | -0.206 |  |  |     | <i>KCNB2</i>     | Body    |
| cg04960602 | 13 | 112,352,250 | 0.000582 | -0.316 | -0.231 |  |  |     |                  |         |
| cg04722643 | 17 | 80,289,500  | 1.4E-09  | -0.316 | -0.268 |  |  |     | <i>SECTM1</i>    | 5'UTR   |
| cg04861230 | 1  | 159,682,497 | 1.01E-13 | -0.316 | -0.325 |  |  |     | <i>CRP</i>       | 3'UTR   |
| cg18241469 | 3  | 168,136,028 | 6.45E-06 | -0.316 | -0.263 |  |  |     | <i>C3orf50</i>   | Body    |
| cg01722493 | 6  | 166,570,199 | 3.11E-08 | -0.316 | -0.224 |  |  |     |                  |         |
| cg13434489 | 1  | 3,189,088   | 0.010942 | -0.316 | -0.089 |  |  |     | <i>PRDM16</i>    | Body    |
| cg03252770 | 4  | 154,354,354 | 6.89E-13 | -0.316 | -0.292 |  |  |     |                  |         |
| cg12686407 | 11 | 104,035,942 | 4E-05    | -0.316 | -0.330 |  |  |     | <i>PDGFD</i>     | TSS1500 |
| cg04583904 | 16 | 33,627,536  | 0.000138 | -0.316 | -0.258 |  |  |     |                  |         |
| cg06118116 | 2  | 228,336,171 | 2.95E-16 | -0.316 | -0.311 |  |  |     | <i>AGFG1</i>     | TSS1500 |
| cg23532985 | 11 | 4,626,526   | 8.57E-10 | -0.316 | -0.304 |  |  |     | <i>TRIM68</i>    | Body    |
| cg21960265 | 6  | 32,015,635  | 1.69E-06 | -0.317 | -0.220 |  |  |     | <i>TNXB</i>      | Body    |
| cg14269191 | 11 | 5,346,249   | 0.002559 | -0.317 | -0.287 |  |  |     | <i>OR51B2</i>    | TSS1500 |
| cg20422212 | 6  | 133,576,214 | 1.03E-07 | -0.317 | -0.304 |  |  |     | <i>EYA4</i>      | 5'UTR   |

|            |    |             |          |        |        |          |        |     |                     |         |
|------------|----|-------------|----------|--------|--------|----------|--------|-----|---------------------|---------|
| cg06437799 | 1  | 155,659,719 | 7.09E-11 | -0.317 | -0.319 |          |        |     | <i>DAP3</i>         | 5'UTR   |
| cg20312687 | 20 | 29,956,585  | 2.59E-06 | -0.317 | -0.274 | 2.56E-10 | -0.221 |     | <i>DEFB118</i>      | Body    |
| cg15099397 | 13 | 110,761,577 | 1.05E-06 | -0.317 | -0.296 |          |        |     |                     |         |
| cg13720705 | 10 | 37,990,370  | 0.000212 | -0.317 | -0.282 |          |        |     |                     |         |
| cg00327544 | 7  | 32,307,671  | 0.000597 | -0.317 | -0.261 |          |        |     |                     |         |
| cg21580421 | 3  | 112,361,234 | 0.000383 | -0.317 | -0.331 |          |        |     | <i>CCDC80</i>       | TSS1500 |
| cg13918472 | 7  | 63,153,149  | 1.29E-06 | -0.317 | -0.286 |          |        |     |                     |         |
| cg23384428 | 6  | 154,406,841 | 0.000994 | -0.317 | -0.286 |          |        |     | <i>OPRM1</i>        | Body    |
| cg14907066 | 8  | 1,048,112   | 1.94E-07 | -0.317 | -0.354 |          |        |     |                     |         |
| cg14118839 | 10 | 36,711,931  | 0.002841 | -0.317 | -0.312 |          |        |     |                     |         |
| cg02482478 | 12 | 131,624,445 | 0.018741 | -0.317 | -0.163 |          |        |     | <i>GPR133</i>       | 3'UTR   |
| cg00923934 | 8  | 55,795,838  | 4.25E-09 | -0.318 | -0.329 |          |        |     |                     |         |
| cg07957035 | 16 | 49,623,763  | 0.001946 | -0.318 | -0.199 |          |        |     | <i>ZNF423</i>       | Body    |
| cg13563390 | 9  | 99,253,610  | 2.66E-07 | -0.318 | -0.327 |          |        | Yes | <i>HABP4</i>        | 3'UTR   |
| cg05846851 | 16 | 10,172,054  | 3.33E-05 | -0.318 | -0.341 |          |        | Yes | <i>GRIN2A</i>       | Body    |
| cg05027713 | 8  | 32,637,753  | 3.69E-09 | -0.318 | -0.319 |          |        |     |                     |         |
| cg08061524 | 22 | 46,472,568  | 2.22E-12 | -0.318 | -0.271 |          |        |     |                     |         |
| cg14454796 | 2  | 242,031,694 | 0.010416 | -0.318 | -0.194 |          |        |     | <i>MTERFD2</i>      | Body    |
| cg09006039 | 4  | 65,778,481  | 2.41E-06 | -0.318 | -0.282 |          |        |     |                     |         |
| cg09134205 | 7  | 154,003,215 | 0.020787 | -0.318 | -0.263 |          |        |     | <i>DPP6</i>         | Body    |
| cg09362969 | 1  | 3,827,065   | 4E-19    | -0.318 | -0.298 |          |        |     | <i>LOC100133612</i> | Body    |
| cg02877152 | 4  | 186,558,596 | 4.1E-11  | -0.318 | -0.326 |          |        |     | <i>SORBS2</i>       | Body    |
| cg26165993 | 18 | 76,639,446  | 1.74E-10 | -0.318 | -0.332 |          |        |     |                     |         |
| cg22601108 | 1  | 158,723,939 | 0.00011  | -0.318 | -0.238 |          |        |     | <i>OR6K6</i>        | TSS1500 |
| cg02571204 | 10 | 114,591,733 | 2.03E-07 | -0.318 | -0.346 |          |        |     |                     |         |
| cg21036593 | X  | 150,349,034 | 0.009185 | -0.318 | -0.241 |          |        |     | <i>GPR50</i>        | Body    |
| cg12514868 | 4  | 2,491,659   | 3.77E-06 | -0.318 | -0.221 |          |        |     | <i>RNF4</i>         | 5'UTR   |
| cg03222483 | 1  | 153,283,628 | 9.91E-05 | -0.318 | -0.294 |          |        |     | <i>PGLYRP3</i>      | TSS1500 |
| cg00962147 | 16 | 6,949,843   | 1.07E-08 | -0.318 | -0.320 |          |        |     | <i>A2BP1</i>        | 5'UTR   |
| cg00121045 | 16 | 1,416,053   | 0.002633 | -0.318 | -0.340 |          |        |     | <i>UNKL</i>         | 3'UTR   |
| cg09238049 | 16 | 1,205,018   | 1.26E-22 | -0.318 | -0.326 |          |        |     | <i>CACNA1H</i>      | Body    |
| cg21734996 | 4  | 16,760,829  | 3.69E-08 | -0.318 | -0.315 |          |        |     | <i>LDB2</i>         | Body    |
| cg04281261 | 20 | 5,451,900   | 4.9E-06  | -0.318 | -0.296 |          |        |     | <i>LOC643406</i>    | Body    |
| cg00378950 | X  | 89,177,498  | 0.030656 | -0.319 | -0.129 |          |        |     | <i>TGIF2LX</i>      | Body    |

|            |    |             |          |        |        |  |  |     |           |         |
|------------|----|-------------|----------|--------|--------|--|--|-----|-----------|---------|
| cg11022093 | 2  | 58,597,564  | 4.32E-12 | -0.319 | -0.312 |  |  |     |           |         |
| cg20284039 | X  | 150,339,834 | 5.73E-07 | -0.319 | -0.248 |  |  |     |           |         |
| cg22947965 | 11 | 123,775,188 | 8.37E-07 | -0.319 | -0.327 |  |  |     |           |         |
| cg12897978 | 4  | 23,424,592  | 0.001661 | -0.319 | -0.290 |  |  |     |           |         |
| cg21045828 | 8  | 89,310,065  | 1.12E-09 | -0.319 | -0.295 |  |  |     | MMP16     | Body    |
| cg12924510 | 18 | 514,363     | 4.5E-06  | -0.319 | -0.330 |  |  |     |           |         |
| cg14210862 | 9  | 91,193,195  | 2.54E-14 | -0.319 | -0.330 |  |  |     |           |         |
| cg23874373 | 17 | 77,952,488  | 0.014006 | -0.319 | -0.299 |  |  |     | TBC1D16   | Body    |
| cg01300105 | 8  | 72,599,552  | 0.007055 | -0.319 | -0.282 |  |  |     |           |         |
| cg12178904 | 1  | 205,632,052 | 6.49E-21 | -0.319 | -0.289 |  |  |     | SLC45A3   | Body    |
| cg09417355 | 1  | 152,814,273 | 0.001507 | -0.319 | -0.240 |  |  |     | LCE6A     | TSS1500 |
| cg14829090 | 4  | 174,434,004 | 9.52E-11 | -0.319 | -0.293 |  |  |     |           |         |
| cg09758273 | 4  | 1,237,995   | 4.62E-06 | -0.319 | -0.228 |  |  |     | CTBP1     | Body    |
| cg13714540 | 6  | 137,366,432 | 6.12E-11 | -0.319 | -0.299 |  |  |     | IL20RA    | TSS200  |
| cg24137322 | 4  | 77,484,566  | 2.19E-11 | -0.320 | -0.262 |  |  |     | SHROOM3   | Body    |
| cg11344217 | 1  | 186,096,558 | 0.000763 | -0.320 | -0.249 |  |  |     | HMCN1     | Body    |
| cg18200038 | 7  | 55,712,946  | 4.37E-05 | -0.320 | -0.353 |  |  |     | LOC442308 | TSS1500 |
| cg17069590 | 3  | 112,647,810 | 5.24E-16 | -0.320 | -0.315 |  |  |     | CD200R1   | 3'UTR   |
| cg12303981 | 6  | 2,244,766   | 1.25E-05 | -0.320 | -0.208 |  |  |     | GMDS      | Body    |
| cg22978940 | 21 | 46,898,610  | 9.07E-10 | -0.320 | -0.258 |  |  |     | COL18A1   | Body    |
| cg17036641 | 3  | 52,723,544  | 6.67E-13 | -0.320 | -0.329 |  |  |     | GNL3      | Body    |
| cg01113073 | 6  | 155,686,868 | 4.46E-06 | -0.320 | -0.269 |  |  |     |           |         |
| cg27545630 | 16 | 2,013,058   | 9.68E-16 | -0.320 | -0.327 |  |  |     | SNORA64   | Body    |
| cg11367259 | 8  | 89,969,235  | 0.043632 | -0.320 | -0.241 |  |  | Yes |           |         |
| cg16662846 | 1  | 238,648,845 | 0.001145 | -0.320 | -0.271 |  |  |     | LOC339535 | Body    |
| cg24611351 | 2  | 71,228,551  | 8.51E-15 | -0.320 | -0.288 |  |  |     |           |         |
| cg04240491 | 2  | 30,827,623  | 2.19E-17 | -0.320 | -0.310 |  |  |     | LCLAT1    | Body    |
| cg15609462 | 15 | 98,646,401  | 0.002398 | -0.320 | -0.257 |  |  |     |           |         |
| cg20944283 | 1  | 159,172,620 | 1.39E-12 | -0.320 | -0.300 |  |  |     | CADM3     | 3'UTR   |
| cg00444390 | 11 | 7,950,225   | 0.001272 | -0.320 | -0.240 |  |  |     | OR10A6    | TSS200  |
| cg10385251 | 1  | 247,679,636 | 2.83E-11 | -0.320 | -0.289 |  |  |     |           |         |
| cg15788279 | X  | 152,874,850 | 5.67E-09 | -0.321 | -0.282 |  |  |     |           |         |
| cg06951647 | 13 | 111,057,782 | 0.004813 | -0.321 | -0.173 |  |  |     | COL4A2    | Body    |
| cg24341059 | 8  | 121,604,940 | 0.00079  | -0.321 | -0.264 |  |  |     | SNTB1     | Body    |

|            |    |             |          |        |        |          |        |  |                 |         |
|------------|----|-------------|----------|--------|--------|----------|--------|--|-----------------|---------|
| cg26081584 | 12 | 40,938,571  | 1.78E-12 | -0.321 | -0.324 |          |        |  |                 |         |
| cg05416337 | 18 | 49,865,270  | 0.016327 | -0.321 | -0.143 |          |        |  | <i>DCC</i>      | TSS1500 |
| cg08351085 | 13 | 113,980,035 | 1.4E-09  | -0.321 | -0.249 |          |        |  | <i>GRTP1</i>    | Body    |
| cg11719576 | 1  | 158,153,771 | 0.006154 | -0.321 | -0.279 |          |        |  | <i>CD1D</i>     | Body    |
| cg07661564 | 17 | 44,919,658  | 1.9E-07  | -0.321 | -0.240 |          |        |  |                 |         |
| cg13453244 | 8  | 119,686,648 | 2.35E-11 | -0.321 | -0.326 |          |        |  |                 |         |
| cg08051977 | 17 | 80,045,039  | 0.000397 | -0.321 | -0.211 |          |        |  | <i>FASN</i>     | Body    |
| cg21584518 | 7  | 142,033,426 | 0.000131 | -0.321 | -0.335 |          |        |  |                 |         |
| cg18528593 | 19 | 3,381,526   | 3.99E-14 | -0.321 | -0.322 |          |        |  | <i>NFIC</i>     | Body    |
| cg14874337 | 19 | 38,864,187  | 2.52E-08 | -0.321 | -0.321 |          |        |  | <i>PSMD8</i>    | TSS1500 |
| cg24082368 | 14 | 28,732,361  | 0.000525 | -0.321 | -0.271 |          |        |  |                 |         |
| cg27200257 | 17 | 79,816,678  | 9.9E-17  | -0.321 | -0.323 |          |        |  | <i>P4HB</i>     | Body    |
| cg13177195 | 12 | 41,289,297  | 2.63E-12 | -0.321 | -0.289 |          |        |  | <i>CNTN1</i>    | 5'UTR   |
| cg05784088 | 1  | 157,738,458 | 7.96E-07 | -0.321 | -0.280 |          |        |  | <i>FCRL2</i>    | Body    |
| cg22040303 | X  | 150,912,076 | 9.8E-14  | -0.321 | -0.297 |          |        |  | <i>CNGA2</i>    | Body    |
| cg15593510 | 1  | 158,369,112 | 1.77E-08 | -0.322 | -0.333 |          |        |  | <i>OR10T2</i>   | 1stExon |
| cg03227775 | 7  | 2,972,073   | 0.000221 | -0.322 | -0.297 |          |        |  | <i>CARD11</i>   | Body    |
| cg08174890 | 4  | 9,558,077   | 5.7E-15  | -0.322 | -0.341 |          |        |  | <i>MIR548I2</i> | TSS200  |
| cg21289437 | 13 | 112,692,270 | 0.001244 | -0.322 | -0.279 |          |        |  |                 |         |
| cg14570051 | 18 | 10,955,104  | 2.4E-06  | -0.322 | -0.305 |          |        |  | <i>FAM38B</i>   | Body    |
| cg18699226 | 7  | 31,980,400  | 6.3E-05  | -0.322 | -0.294 |          |        |  | <i>PDE1C</i>    | Body    |
| cg15992935 | 6  | 137,366,346 | 7.97E-09 | -0.322 | -0.264 |          |        |  | <i>IL20RA</i>   | TSS200  |
| cg16236270 | 7  | 99,697,319  | 1.26E-08 | -0.322 | -0.312 |          |        |  | <i>MCM7</i>     | Body    |
| cg12646067 | 22 | 50,481,514  | 1.69E-05 | -0.322 | -0.328 |          |        |  | <i>TLL8</i>     | Body    |
| cg13778078 | 4  | 785,160     | 2.01E-10 | -0.322 | -0.347 |          |        |  | <i>CPLX1</i>    | Body    |
| cg19145001 | 7  | 50,470,118  | 0.000582 | -0.322 | -0.278 |          |        |  | <i>IKZF1</i>    | 3'UTR   |
| cg24405700 | 12 | 655,829     | 2.98E-12 | -0.322 | -0.315 |          |        |  | <i>B4GALNT3</i> | Body    |
| cg03503785 | 16 | 23,962,572  | 2.57E-05 | -0.322 | -0.347 |          |        |  | <i>PRKCB</i>    | Body    |
| cg08918576 | 1  | 158,688,775 | 1.42E-10 | -0.322 | -0.292 |          |        |  | <i>OR6K3</i>    | TSS1500 |
| cg03561071 | 11 | 91,844,355  | 0.003088 | -0.322 | -0.333 |          |        |  |                 |         |
| cg14107638 | X  | 151,286,380 | 0.000264 | -0.322 | -0.254 | 1.01E-08 | -0.128 |  | <i>MAGEA5</i>   | 5'UTR   |
| cg13121732 | 14 | 105,260,250 | 1.01E-08 | -0.322 | -0.288 |          |        |  | <i>AKT1</i>     | TSS1500 |
| cg10894063 | 2  | 58,722,314  | 1.84E-05 | -0.322 | -0.278 |          |        |  |                 |         |
| cg07872947 | 2  | 1,732,172   | 0.000421 | -0.322 | -0.325 |          |        |  | <i>PXDN</i>     | Body    |



|            |    |             |          |        |        |  |  |  |                  |         |
|------------|----|-------------|----------|--------|--------|--|--|--|------------------|---------|
| cg26140836 | X  | 108,870,738 | 0.012962 | -0.322 | -0.254 |  |  |  |                  |         |
| cg12857407 | X  | 151,903,194 | 0.046706 | -0.322 | -0.146 |  |  |  | <i>MAGEA12</i>   | TSS200  |
| cg20316883 | 8  | 138,493,473 | 0.000315 | -0.323 | -0.251 |  |  |  |                  |         |
| cg16359985 | 7  | 100,276,087 | 4.1E-10  | -0.323 | -0.274 |  |  |  | <i>GNB2</i>      | Body    |
| cg21490751 | 3  | 168,268,421 | 2.34E-08 | -0.323 | -0.252 |  |  |  | <i>MIR551B</i>   | TSS1500 |
| cg04641165 | 6  | 16,139,117  | 3.31E-10 | -0.323 | -0.320 |  |  |  | <i>MYLIP</i>     | Body    |
| cg22110888 | 17 | 80,059,540  | 7.54E-09 | -0.323 | -0.285 |  |  |  | <i>CCDC57</i>    | 3'UTR   |
| cg06338958 | 16 | 1,489,061   | 2.6E-08  | -0.323 | -0.325 |  |  |  | <i>CCDC154</i>   | Body    |
| cg21148025 | 21 | 19,639,479  | 3.12E-09 | -0.323 | -0.291 |  |  |  | <i>CHODL</i>     | 3'UTR   |
| cg19757261 | 10 | 44,222,463  | 2.07E-08 | -0.323 | -0.296 |  |  |  |                  |         |
| cg13821176 | 8  | 126,448,338 | 9.71E-05 | -0.323 | -0.341 |  |  |  | <i>TRIB1</i>     | Body    |
| cg00814328 | 19 | 22,992,509  | 5.98E-06 | -0.323 | -0.281 |  |  |  |                  |         |
| cg27369641 | 7  | 100,274,361 | 1.42E-15 | -0.323 | -0.308 |  |  |  | <i>GNB2</i>      | Body    |
| cg09857273 | 8  | 95,230,984  | 3.87E-09 | -0.323 | -0.323 |  |  |  | <i>CDH17</i>     | TSS1500 |
| cg18323376 | 20 | 30,028,241  | 0.009198 | -0.323 | -0.210 |  |  |  | <i>DEFB123</i>   | TSS200  |
| cg08146256 | 14 | 21,734,410  | 3.99E-14 | -0.323 | -0.276 |  |  |  | <i>HNRNPC</i>    | 5'UTR   |
| cg27226927 | 17 | 79,993,863  | 1.92E-14 | -0.323 | -0.285 |  |  |  | <i>DCXR</i>      | Body    |
| cg00887902 | 8  | 56,436,393  | 2.98E-07 | -0.323 | -0.348 |  |  |  | <i>XKR4</i>      | Body    |
| cg04876124 | 1  | 3,160,911   | 3.62E-09 | -0.323 | -0.313 |  |  |  | <i>PRDM16</i>    | Body    |
| cg08596532 | 5  | 5,033,993   | 6.42E-09 | -0.323 | -0.313 |  |  |  | <i>LOC340094</i> | TSS1500 |
| cg14151372 | 10 | 108,045,557 | 7.14E-09 | -0.323 | -0.298 |  |  |  |                  |         |
| cg25921502 | 10 | 50,363,896  | 2.57E-05 | -0.324 | -0.267 |  |  |  | <i>C10orf128</i> | 3'UTR   |
| cg01520122 | 17 | 32,595,801  | 3.87E-07 | -0.324 | -0.296 |  |  |  | <i>CCL7</i>      | TSS1500 |
| cg02378063 | 4  | 22,913,868  | 5.44E-12 | -0.324 | -0.314 |  |  |  |                  |         |
| cg08330011 | 4  | 4,232,220   | 6.16E-11 | -0.324 | -0.329 |  |  |  |                  |         |
| cg07196505 | 16 | 7,565,837   | 1.28E-09 | -0.324 | -0.318 |  |  |  | <i>A2BP1</i>     | Body    |
| cg08281123 | 3  | 19,791,304  | 0.036257 | -0.324 | -0.193 |  |  |  |                  |         |
| cg21551253 | 12 | 131,418,217 | 0.000359 | -0.324 | -0.235 |  |  |  |                  |         |
| cg04441847 | 2  | 38,976,288  | 1.29E-09 | -0.324 | -0.350 |  |  |  | <i>SFRS7</i>     | Body    |
| cg26106316 | 2  | 56,701,451  | 9.4E-08  | -0.324 | -0.332 |  |  |  |                  |         |
| cg00985817 | 4  | 23,584,720  | 1.67E-09 | -0.324 | -0.334 |  |  |  |                  |         |
| cg23678565 | 20 | 52,688,442  | 1.98E-11 | -0.324 | -0.338 |  |  |  | <i>BCAS1</i>     | TSS1500 |
| cg25731211 | 17 | 79,694,636  | 1.32E-07 | -0.324 | -0.311 |  |  |  |                  |         |
| cg00068779 | 4  | 189,956,957 | 0.003822 | -0.324 | -0.203 |  |  |  |                  |         |

|            |    |             |          |        |        |          |        |  |                 |         |
|------------|----|-------------|----------|--------|--------|----------|--------|--|-----------------|---------|
| cg14526874 | 4  | 17,348,908  | 1.99E-06 | -0.324 | -0.295 |          |        |  |                 |         |
| cg04866380 | 7  | 31,725,973  | 0.000685 | -0.324 | -0.235 |          |        |  | <i>C7orf16</i>  | TSS1500 |
| cg19597545 | 8  | 89,099,606  | 0.000351 | -0.324 | -0.283 |          |        |  | <i>MMP16</i>    | Body    |
| cg10908188 | 3  | 56,717,798  | 3.7E-09  | -0.324 | -0.313 |          |        |  | <i>C3orf63</i>  | TSS1500 |
| cg00023726 | 1  | 2,839,935   | 5.9E-07  | -0.324 | -0.275 |          |        |  |                 |         |
| cg04349219 | 14 | 105,688,129 | 3.03E-06 | -0.325 | -0.274 |          |        |  | <i>BRF1</i>     | Body    |
| cg01824172 | 7  | 139,475,138 | 5.57E-18 | -0.325 | -0.301 |          |        |  | <i>HIPK2</i>    | Body    |
| cg19039481 | 2  | 394,115     | 6.63E-08 | -0.325 | -0.335 |          |        |  |                 |         |
| cg25448687 | 2  | 49,143,534  | 0.000135 | -0.325 | -0.288 |          |        |  |                 |         |
| cg13012086 | 12 | 43,968,909  | 2.31E-06 | -0.325 | -0.268 |          |        |  |                 |         |
| cg24819967 | 10 | 135,190,860 | 8.67E-18 | -0.325 | -0.295 |          |        |  |                 |         |
| cg13354679 | 6  | 133,713,169 | 0.000994 | -0.325 | -0.315 |          |        |  | <i>EYA4</i>     | Body    |
| cg21578543 | 4  | 155,312,795 | 0.002844 | -0.325 | -0.174 |          |        |  | <i>DCHS2</i>    | TSS1500 |
| cg23174148 | 3  | 141,174,337 | 2.48E-09 | -0.325 | -0.352 |          |        |  |                 |         |
| cg14207921 | 14 | 20,898,785  | 7.78E-14 | -0.325 | -0.312 |          |        |  | <i>KLHL33</i>   | Body    |
| cg10917952 | 11 | 5,989,222   | 1.03E-05 | -0.325 | -0.311 |          |        |  | <i>OR56A5</i>   | 1stExon |
| cg08786003 | 1  | 157,670,710 | 0.000425 | -0.325 | -0.360 | 7.5E-13  | -0.269 |  | <i>FCRL3</i>    | TSS200  |
| cg26276249 | 1  | 185,925,432 | 2E-10    | -0.325 | -0.303 |          |        |  | <i>HMCN1</i>    | Body    |
| cg00082912 | 17 | 52,194,268  | 7.76E-11 | -0.325 | -0.338 |          |        |  |                 |         |
| cg02869444 | 10 | 110,998,760 | 0.002368 | -0.325 | -0.229 |          |        |  |                 |         |
| cg03725652 | 18 | 76,073,399  | 0.001278 | -0.325 | -0.199 |          |        |  |                 |         |
| cg19793904 | 12 | 128,943,277 | 2.34E-06 | -0.325 | -0.300 |          |        |  | <i>TMEM132C</i> | Body    |
| cg03467047 | 3  | 118,864,763 | 3.29E-08 | -0.325 | -0.273 |          |        |  | <i>IGSF11</i>   | 1stExon |
| cg16278077 | 1  | 205,635,579 | 2.54E-05 | -0.325 | -0.208 |          |        |  | <i>SLC45A3</i>  | 5'UTR   |
| cg12406124 | 3  | 156,876,145 | 3.31E-18 | -0.325 | -0.333 |          |        |  | <i>CCNL1</i>    | Body    |
| cg25326491 | 6  | 152,960,531 | 0.001258 | -0.326 | -0.285 |          |        |  |                 |         |
| cg00298977 | 1  | 153,175,842 | 1.65E-08 | -0.326 | -0.304 |          |        |  | <i>LELP1</i>    | TSS200  |
| cg23992209 | 1  | 157,811,905 | 3.47E-05 | -0.326 | -0.325 |          |        |  | <i>CD5L</i>     | TSS1500 |
| cg17352276 | 15 | 66,795,208  | 4.08E-13 | -0.326 | -0.304 |          |        |  | <i>SNORD16</i>  | Body    |
| cg26765743 | 20 | 59,047,488  | 0.000203 | -0.326 | -0.261 |          |        |  |                 |         |
| cg27476859 | 7  | 2,772,710   | 2.26E-14 | -0.326 | -0.334 |          |        |  | <i>GNA12</i>    | Body    |
| cg11489090 | 8  | 10,405,250  | 1.11E-14 | -0.326 | -0.297 |          |        |  |                 |         |
| cg20018806 | 11 | 59,633,874  | 4.57E-08 | -0.326 | -0.265 | 5.34E-14 | -0.163 |  | <i>TCN1</i>     | 1stExon |
| cg24360034 | 11 | 124,414,205 | 5.73E-06 | -0.326 | -0.365 |          |        |  | <i>OR8B12</i>   | TSS1500 |

|            |    |             |          |        |        |          |        |     |                  |         |
|------------|----|-------------|----------|--------|--------|----------|--------|-----|------------------|---------|
| cg02709924 | 8  | 32,579,011  | 3.66E-07 | -0.326 | -0.295 |          |        |     | <i>NRG1</i>      | Body    |
| cg05673079 | 10 | 110,084,660 | 1.27E-05 | -0.326 | -0.248 |          |        |     |                  |         |
| cg03724628 | 19 | 1,440,260   | 2.68E-06 | -0.326 | -0.267 |          |        |     | <i>RPS15</i>     | Body    |
| cg18827893 | X  | 27,765,005  | 2.37E-07 | -0.326 | -0.262 |          |        |     | <i>DCAF8L2</i>   | 5'UTR   |
| cg07269374 | 12 | 66,176,707  | 2.92E-07 | -0.327 | -0.304 |          |        |     | <i>RPSAP52</i>   | Body    |
| cg01132056 | 4  | 178,170,788 | 3.29E-11 | -0.327 | -0.317 |          |        |     |                  |         |
| cg24763840 | 5  | 5,034,397   | 0.042379 | -0.327 | -0.205 |          |        |     | <i>LOC340094</i> | TSS200  |
| cg16264595 | 1  | 4,619,207   | 0.000346 | -0.327 | -0.284 |          |        |     |                  |         |
| cg26188543 | 3  | 148,664,839 | 7.38E-06 | -0.327 | -0.369 |          |        |     |                  |         |
| cg22598458 | 7  | 64,862,915  | 1.5E-14  | -0.327 | -0.329 |          |        |     | <i>ZNF92</i>     | Body    |
| cg23191950 | 15 | 101,419,074 | 0.000105 | -0.327 | -0.253 | 1.21E-20 | -0.203 |     | <i>ALDH1A3</i>   | TSS1500 |
| cg07379779 | 3  | 23,641,714  | 3.15E-08 | -0.327 | -0.254 |          |        |     |                  |         |
| cg05205314 | 5  | 23,411,506  | 5.78E-05 | -0.327 | -0.263 |          |        |     |                  |         |
| cg02811368 | 12 | 131,402,564 | 8.14E-08 | -0.327 | -0.239 |          |        |     |                  |         |
| cg23962746 | 1  | 209,105,888 | 0.000129 | -0.327 | -0.366 |          |        |     |                  |         |
| cg04436634 | 1  | 158,575,773 | 8.26E-07 | -0.327 | -0.314 |          |        |     | <i>OR10Z1</i>    | TSS1500 |
| cg25316305 | 12 | 4,361,135   | 0.000283 | -0.328 | -0.256 |          |        |     |                  |         |
| cg26915336 | 7  | 35,407,225  | 0.002564 | -0.328 | -0.348 |          |        |     |                  |         |
| cg25188238 | 8  | 56,436,589  | 5.83E-05 | -0.328 | -0.278 |          |        |     | <i>XKR4</i>      | Body    |
| cg00079598 | 11 | 123,676,903 | 3.63E-06 | -0.328 | -0.314 |          |        |     | <i>OR6M1</i>     | 1stExon |
| cg26789038 | 7  | 50,468,722  | 0.022422 | -0.328 | -0.201 |          |        |     | <i>IKZF1</i>     | 3'UTR   |
| cg08782022 | 16 | 4,730,136   | 5.45E-21 | -0.328 | -0.317 |          |        | Yes | <i>MGRN1</i>     | Body    |
| cg19310458 | 2  | 80,361,612  | 4.68E-08 | -0.328 | -0.340 |          |        |     | <i>CTNNA2</i>    | Body    |
| cg02947498 | 14 | 90,139,566  | 1.95E-09 | -0.328 | -0.339 |          |        |     |                  |         |
| cg03152913 | 2  | 178,975,712 | 6.22E-13 | -0.328 | -0.306 |          |        |     | <i>RBM45</i>     | TSS1500 |
| cg02106866 | 11 | 104,758,259 | 1.68E-06 | -0.328 | -0.246 |          |        |     | <i>CASP12</i>    | Body    |
| cg08421550 | X  | 150,883,777 | 4.38E-08 | -0.328 | -0.347 |          |        |     | <i>FATE1</i>     | TSS1500 |
| cg00554631 | 4  | 155,340,841 | 2.38E-05 | -0.328 | -0.272 |          |        |     | <i>DCHS2</i>     | Body    |
| cg20841191 | 17 | 79,035,225  | 1.45E-15 | -0.328 | -0.317 |          |        |     | <i>BAIAP2</i>    | Body    |
| cg20823091 | 1  | 152,680,639 | 0.000625 | -0.328 | -0.257 |          |        |     | <i>LCE4A</i>     | TSS1500 |
| cg08435683 | 20 | 4,836,338   | 1.1E-08  | -0.328 | -0.306 |          |        |     | <i>SLC23A2</i>   | 3'UTR   |
| cg19547192 | 7  | 158,059,976 | 1.16E-05 | -0.329 | -0.334 |          |        |     | <i>PTPRN2</i>    | Body    |
| cg03082523 | 1  | 3,155,965   | 2.35E-08 | -0.329 | -0.250 |          |        |     | <i>PRDM16</i>    | Body    |
| cg11783356 | 20 | 44,313,418  | 1.08E-12 | -0.329 | -0.323 |          |        |     | <i>WFDC10B</i>   | 3'UTR   |

|            |    |             |          |        |        |          |        |  |                 |         |
|------------|----|-------------|----------|--------|--------|----------|--------|--|-----------------|---------|
| cg13804838 | 17 | 80,053,022  | 6.74E-25 | -0.329 | -0.329 |          |        |  | <i>FASN</i>     | Body    |
| cg15763984 | 4  | 1,342,303   | 1.65E-08 | -0.329 | -0.355 |          |        |  | <i>KIAA1530</i> | Body    |
| cg24581650 | 5  | 172,263,112 | 1.76E-12 | -0.329 | -0.325 |          |        |  | <i>ERGIC1</i>   | Body    |
| cg21732056 | 11 | 7,819,812   | 0.000142 | -0.329 | -0.322 |          |        |  | <i>OR5P2</i>    | TSS1500 |
| cg05990988 | 5  | 4,223,068   | 2.34E-05 | -0.329 | -0.272 |          |        |  |                 |         |
| cg08727352 | 6  | 33,264,844  | 6.76E-06 | -0.329 | -0.237 |          |        |  | <i>RGL2</i>     | Body    |
| cg13036702 | 11 | 94,799,727  | 1.57E-15 | -0.329 | -0.319 |          |        |  | <i>SFRS2B</i>   | TSS1500 |
| cg13486759 | 9  | 86,751,815  | 1.47E-19 | -0.329 | -0.310 |          |        |  |                 |         |
| cg00874589 | 3  | 112,405,614 | 8.73E-09 | -0.329 | -0.337 |          |        |  |                 |         |
| cg06193520 | 16 | 1,373,703   | 1.51E-08 | -0.329 | -0.308 |          |        |  | <i>UBE2I</i>    | Body    |
| cg02489492 | 12 | 16,662,646  | 3.14E-08 | -0.329 | -0.305 |          |        |  |                 |         |
| cg15707869 | 8  | 88,884,985  | 8.3E-14  | -0.329 | -0.316 |          |        |  | <i>DCAF4L2</i>  | 3'UTR   |
| cg12844277 | 14 | 47,544,244  | 1.08E-07 | -0.329 | -0.338 |          |        |  | <i>MDGA2</i>    | Body    |
| cg21312148 | 1  | 152,636,074 | 0.00067  | -0.329 | -0.292 | 4.92E-10 | -0.201 |  | <i>LCE2D</i>    | 5'UTR   |
| cg02258139 | 7  | 97,841,513  | 0.008699 | -0.329 | -0.151 |          |        |  | <i>BHLHA15</i>  | TSS200  |
| cg09814034 | 20 | 44,876,346  | 7.1E-06  | -0.329 | -0.410 |          |        |  | <i>CDH22</i>    | Body    |
| cg18126060 | 12 | 4,923,430   | 0.000601 | -0.329 | -0.258 |          |        |  | <i>KCNA6</i>    | 3'UTR   |
| cg18276125 | 10 | 102,749,041 | 0.000689 | -0.330 | -0.278 |          |        |  | <i>C10orf2</i>  | 1stExon |
| cg03157509 | 19 | 1,313,407   | 1.95E-16 | -0.330 | -0.327 |          |        |  |                 |         |
| cg03424345 | 12 | 130,411,272 | 2.74E-05 | -0.330 | -0.280 |          |        |  |                 |         |
| cg11211197 | 12 | 127,980,652 | 0.002974 | -0.330 | -0.265 |          |        |  |                 |         |
| cg19022006 | 18 | 61,143,945  | 5.84E-05 | -0.330 | -0.313 |          |        |  | <i>SERPINB5</i> | TSS200  |
| cg05024715 | 11 | 123,849,197 | 3.15E-06 | -0.330 | -0.276 |          |        |  | <i>OR10S1</i>   | TSS1500 |
| cg25069807 | 17 | 76,171,191  | 2.64E-13 | -0.330 | -0.312 |          |        |  | <i>TK1</i>      | Body    |
| cg23586792 | 2  | 200,423,026 | 0.0005   | -0.330 | -0.247 |          |        |  |                 |         |
| cg11570011 | 4  | 16,362,340  | 7.43E-08 | -0.330 | -0.332 |          |        |  |                 |         |
| cg00335591 | 7  | 1,596,260   | 3.7E-08  | -0.330 | -0.320 |          |        |  | <i>TMEM184A</i> | TSS200  |
| cg23124613 | 15 | 89,731,485  | 0.000393 | -0.330 | -0.289 |          |        |  | <i>ABHD2</i>    | Body    |
| cg01439568 | 3  | 51,429,919  | 3.69E-08 | -0.330 | -0.281 |          |        |  | <i>RBM15B</i>   | 1stExon |
| cg02687786 | 4  | 16,971,135  | 5.26E-07 | -0.330 | -0.307 |          |        |  |                 |         |
| cg19515081 | 14 | 105,268,492 | 0.000126 | -0.330 | -0.235 |          |        |  | <i>ZBTB42</i>   | Body    |
| cg03962359 | 6  | 154,166,263 | 1.43E-12 | -0.330 | -0.335 |          |        |  |                 |         |
| cg12523109 | X  | 52,825,220  | 5.02E-16 | -0.331 | -0.321 |          |        |  | <i>SPANXN5</i>  | 3'UTR   |
| cg16581308 | 4  | 16,862,080  | 8.42E-09 | -0.331 | -0.345 |          |        |  | <i>LDB2</i>     | Body    |

|            |    |             |          |        |        |          |        |  |                 |         |
|------------|----|-------------|----------|--------|--------|----------|--------|--|-----------------|---------|
| cg06155229 | 7  | 102,937,535 | 2.08E-15 | -0.331 | -0.295 |          |        |  | <i>PMPCB</i>    | TSS1500 |
| cg06450373 | 5  | 19,766,434  | 1.73E-07 | -0.331 | -0.315 |          |        |  | <i>CDH18</i>    | Body    |
| cg16852483 | 13 | 102,103,930 | 4.12E-07 | -0.331 | -0.311 |          |        |  | <i>ITGBL1</i>   | TSS1500 |
| cg12032027 | 20 | 52,198,225  | 7.4E-05  | -0.331 | -0.390 |          |        |  | <i>ZNF217</i>   | 1stExon |
| cg00602115 | 18 | 32,398,987  | 3.48E-07 | -0.331 | -0.237 |          |        |  | <i>DTNA</i>     | 5'UTR   |
| cg20172563 | 6  | 47,487,173  | 4.78E-15 | -0.331 | -0.271 |          |        |  | <i>CD2AP</i>    | Body    |
| cg26929573 | 12 | 34,548,136  | 2.51E-05 | -0.331 | -0.318 |          |        |  |                 |         |
| cg14533401 | 11 | 108,991,744 | 5.27E-07 | -0.331 | -0.337 |          |        |  |                 |         |
| cg14555736 | 12 | 128,852,982 | 3.87E-05 | -0.331 | -0.319 |          |        |  | <i>TMEM132C</i> | Body    |
| cg00215902 | 11 | 122,198,071 | 3.11E-06 | -0.331 | -0.315 |          |        |  |                 |         |
| cg06988547 | 1  | 2,839,763   | 0.001169 | -0.331 | -0.197 |          |        |  |                 |         |
| cg01421252 | 16 | 5,590,677   | 1.8E-09  | -0.331 | -0.348 |          |        |  |                 |         |
| cg17679470 | 4  | 189,602,161 | 8.98E-08 | -0.331 | -0.346 |          |        |  |                 |         |
| cg07837852 | 1  | 198,907,517 | 1.48E-05 | -0.331 | -0.317 |          |        |  |                 |         |
| cg04833731 | 16 | 30,124,803  | 3.51E-17 | -0.331 | -0.314 |          |        |  | <i>GDPD3</i>    | 1stExon |
| cg08948808 | 1  | 152,942,003 | 0.000318 | -0.331 | -0.273 |          |        |  | <i>SPRR4</i>    | TSS1500 |
| cg22124859 | 1  | 152,813,850 | 0.007612 | -0.331 | -0.247 |          |        |  | <i>LCE6A</i>    | TSS1500 |
| cg04227631 | X  | 151,562,205 | 6.96E-09 | -0.331 | -0.300 |          |        |  | <i>GABRA3</i>   | 5'UTR   |
| cg03742642 | 12 | 133,354,143 | 1.1E-09  | -0.332 | -0.304 |          |        |  | <i>GOLGA3</i>   | Body    |
| cg15700197 | 1  | 159,409,207 | 7.35E-08 | -0.332 | -0.317 | 2.39E-17 | -0.256 |  | <i>OR10J1</i>   | TSS1500 |
| cg04249559 | 12 | 655,964     | 6.33E-08 | -0.332 | -0.297 |          |        |  | <i>B4GALNT3</i> | Body    |
| cg08981041 | 4  | 117,624,191 | 8.45E-12 | -0.332 | -0.279 |          |        |  |                 |         |
| cg26677406 | 15 | 92,580,100  | 6.1E-05  | -0.332 | -0.279 |          |        |  | <i>SLCO3A1</i>  | Body    |
| cg13663644 | 9  | 990,692     | 2.19E-05 | -0.332 | -0.237 |          |        |  | <i>DMRT3</i>    | Body    |
| cg14560435 | 9  | 27,949,504  | 5.38E-05 | -0.332 | -0.241 |          |        |  | <i>LINGO2</i>   | Body    |
| cg21498785 | 4  | 686,870     | 3.59E-21 | -0.332 | -0.335 |          |        |  |                 |         |
| cg09069150 | 10 | 108,773,772 | 1.05E-13 | -0.332 | -0.350 |          |        |  | <i>SORCS1</i>   | Body    |
| cg21243589 | 2  | 88,428,542  | 9.25E-07 | -0.332 | -0.313 |          |        |  | <i>FABP1</i>    | TSS1500 |
| cg14993912 | 5  | 83,683,585  | 1.99E-06 | -0.332 | -0.300 |          |        |  |                 |         |
| cg14211837 | 18 | 53,695,649  | 1.36E-06 | -0.333 | -0.280 |          |        |  |                 |         |
| cg21491163 | 5  | 31,323,216  | 0.024756 | -0.333 | -0.260 |          |        |  | <i>CDH6</i>     | Body    |
| cg03276000 | 7  | 154,087,975 | 3.53E-05 | -0.333 | -0.310 |          |        |  | <i>DPP6</i>     | Body    |
| cg18183671 | 3  | 35,720,994  | 0.000448 | -0.333 | -0.314 |          |        |  | <i>ARPP-21</i>  | 5'UTR   |
| cg12980795 | 5  | 85,056,547  | 4.5E-12  | -0.333 | -0.258 |          |        |  |                 |         |

|            |    |             |          |        |        |  |  |  |                  |         |
|------------|----|-------------|----------|--------|--------|--|--|--|------------------|---------|
| cg19171161 | 17 | 77,803,660  | 1.96E-10 | -0.333 | -0.320 |  |  |  |                  |         |
| cg04910834 | 8  | 72,761,320  | 9.76E-05 | -0.333 | -0.329 |  |  |  |                  |         |
| cg06457633 | 10 | 26,726,877  | 0.018922 | -0.333 | -0.251 |  |  |  | <i>APBB1IP</i>   | TSS1500 |
| cg06218079 | 17 | 80,834,228  | 5.7E-16  | -0.333 | -0.321 |  |  |  | <i>TBCD</i>      | Body    |
| cg21836699 | 4  | 9,557,805   | 6.64E-05 | -0.333 | -0.299 |  |  |  | <i>MIR548I2</i>  | Body    |
| cg22935609 | 6  | 55,989,097  | 4.51E-05 | -0.333 | -0.302 |  |  |  | <i>COL21A1</i>   | Body    |
| cg18244845 | 19 | 6,111,541   | 1.93E-13 | -0.333 | -0.344 |  |  |  | <i>RFX2</i>      | TSS1500 |
| cg09329079 | 7  | 1,582,834   | 1.77E-14 | -0.333 | -0.284 |  |  |  | <i>TMEM184A</i>  | 3'UTR   |
| cg02526439 | 8  | 89,053,427  | 5.87E-08 | -0.333 | -0.345 |  |  |  | <i>MMP16</i>     | 3'UTR   |
| cg10435838 | 5  | 5,034,303   | 1.85E-05 | -0.333 | -0.325 |  |  |  | <i>LOC340094</i> | TSS200  |
| cg15057670 | 19 | 51,359,872  | 2.48E-13 | -0.334 | -0.321 |  |  |  | <i>KLK3</i>      | Body    |
| cg05411679 | 16 | 1,090,585   | 1.33E-05 | -0.334 | -0.273 |  |  |  |                  |         |
| cg16493071 | 16 | 1,225,126   | 0.047761 | -0.334 | -0.280 |  |  |  | <i>CACNA1H</i>   | Body    |
| cg12134682 | 7  | 1,574,226   | 9.48E-33 | -0.334 | -0.321 |  |  |  | <i>MAFK</i>      | 5'UTR   |
| cg06903917 | 1  | 242,767,942 | 0.000617 | -0.334 | -0.292 |  |  |  |                  |         |
| cg00187981 | 8  | 142,984,613 | 9.76E-05 | -0.334 | -0.345 |  |  |  |                  |         |
| cg05563813 | 7  | 48,963,408  | 5.72E-07 | -0.334 | -0.340 |  |  |  | <i>CDC14C</i>    | TSS1500 |
| cg22514756 | 1  | 156,426,017 | 1.08E-22 | -0.334 | -0.342 |  |  |  |                  |         |
| cg00257800 | 2  | 57,938,135  | 3.7E-15  | -0.334 | -0.327 |  |  |  |                  |         |
| cg06951383 | 19 | 3,982,749   | 0.001249 | -0.334 | -0.287 |  |  |  | <i>SNORD37</i>   | TSS200  |
| cg06456717 | 18 | 12,092,942  | 1.3E-19  | -0.334 | -0.322 |  |  |  |                  |         |
| cg09906066 | 12 | 40,959,011  | 1.74E-05 | -0.334 | -0.328 |  |  |  |                  |         |
| cg15142042 | 5  | 3,963,277   | 0.000667 | -0.335 | -0.275 |  |  |  |                  |         |
| cg13590456 | 3  | 76,712,364  | 1.52E-05 | -0.335 | -0.313 |  |  |  |                  |         |
| cg10961733 | 10 | 6,807,134   | 0.001092 | -0.335 | -0.280 |  |  |  |                  |         |
| cg12636543 | 8  | 137,878,016 | 2.83E-05 | -0.335 | -0.323 |  |  |  |                  |         |
| cg03693434 | 17 | 80,050,880  | 1.76E-05 | -0.335 | -0.264 |  |  |  | <i>FASN</i>      | Body    |
| cg05208895 | 7  | 100,276,062 | 0.005148 | -0.335 | -0.221 |  |  |  | <i>GNB2</i>      | Body    |
| cg13608414 | 6  | 133,932,895 | 8.62E-07 | -0.335 | -0.298 |  |  |  |                  |         |
| cg19402335 | 1  | 159,410,002 | 4.58E-06 | -0.335 | -0.316 |  |  |  | <i>OR10J1</i>    | 1stExon |
| cg05571619 | 6  | 1,180,377   | 1.19E-12 | -0.335 | -0.290 |  |  |  |                  |         |
| cg09763347 | 8  | 133,574,010 | 0.005514 | -0.335 | -0.245 |  |  |  | <i>HPYR1</i>     | TSS1500 |
| cg07936456 | 16 | 7,708,060   | 0.000536 | -0.335 | -0.240 |  |  |  | <i>A2BP1</i>     | Body    |
| cg27057036 | 8  | 130,997,672 | 0.001426 | -0.335 | -0.383 |  |  |  |                  |         |

|            |    |             |          |        |        |          |        |  |                 |         |
|------------|----|-------------|----------|--------|--------|----------|--------|--|-----------------|---------|
| cg01830271 | 6  | 31,275,148  | 5.77E-06 | -0.336 | -0.356 |          |        |  |                 |         |
| cg25280720 | 1  | 158,532,613 | 6.55E-07 | -0.336 | -0.279 |          |        |  | <i>OR6P1</i>    | 1stExon |
| cg25220990 | 5  | 4,206,669   | 4.16E-09 | -0.336 | -0.308 |          |        |  |                 |         |
| cg13380622 | 1  | 157,557,578 | 3.08E-07 | -0.336 | -0.288 |          |        |  | <i>FCRL4</i>    | Body    |
| cg04744713 | 8  | 142,517,440 | 1.2E-05  | -0.336 | -0.174 |          |        |  | <i>FLJ43860</i> | TSS200  |
| cg16444062 | 16 | 2,770,298   | 6.1E-15  | -0.336 | -0.356 |          |        |  | <i>PRSS27</i>   | 1stExon |
| cg20668321 | 5  | 153,192,843 | 5.05E-07 | -0.336 | -0.304 |          |        |  | <i>GRIA1</i>    | 3'UTR   |
| cg09980403 | 19 | 12,975,529  | 6.78E-20 | -0.336 | -0.326 |          |        |  | <i>MAST1</i>    | Body    |
| cg26819590 | 16 | 2,105,207   | 2.09E-05 | -0.336 | -0.322 |          |        |  | <i>TSC2</i>     | Body    |
| cg21331791 | 13 | 113,653,004 | 0.006617 | -0.336 | -0.240 |          |        |  | <i>MCF2L</i>    | Body    |
| cg20890325 | 4  | 1,239,370   | 3.37E-07 | -0.336 | -0.287 |          |        |  | <i>CTBP1</i>    | Body    |
| cg08907926 | 5  | 3,965,271   | 5.45E-05 | -0.336 | -0.272 |          |        |  |                 |         |
| cg25259754 | 1  | 157,670,220 | 4.9E-07  | -0.336 | -0.337 | 3.79E-21 | -0.276 |  | <i>FCRL3</i>    | Body    |
| cg24465935 | 6  | 153,938,192 | 6.62E-10 | -0.336 | -0.288 |          |        |  |                 |         |
| cg10636760 | 1  | 2,904,595   | 0.008296 | -0.336 | -0.195 |          |        |  |                 |         |
| cg05632088 | 7  | 63,667,446  | 0.00419  | -0.337 | -0.260 |          |        |  | <i>ZNF735</i>   | TSS200  |
| cg01770948 | 16 | 649,132     | 0.033817 | -0.337 | -0.130 |          |        |  | <i>RAB40C</i>   | Body    |
| cg07600623 | 7  | 158,533,890 | 0.001379 | -0.337 | -0.335 |          |        |  | <i>ESYT2</i>    | Body    |
| cg13950362 | 20 | 30,028,062  | 1.86E-07 | -0.337 | -0.335 |          |        |  | <i>DEFB123</i>  | TSS1500 |
| cg09559196 | 5  | 149,375,082 | 3.65E-08 | -0.337 | -0.312 |          |        |  | <i>TIGD6</i>    | Body    |
| cg14537183 | 9  | 140,093,576 | 3.09E-68 | -0.337 | -0.338 |          |        |  | <i>C9orf75</i>  | 1stExon |
| cg17475269 | 7  | 149,324,335 | 3.51E-11 | -0.337 | -0.338 |          |        |  |                 |         |
| cg16111259 | 7  | 78,982,418  | 0.000478 | -0.338 | -0.309 |          |        |  | <i>MAGI2</i>    | Body    |
| cg27656754 | 6  | 137,366,492 | 3.58E-12 | -0.338 | -0.323 |          |        |  | <i>IL20RA</i>   | TSS200  |
| cg22946219 | 17 | 17,714,414  | 0.045614 | -0.338 | -0.105 |          |        |  | <i>RAI1</i>     | 3'UTR   |
| cg15996947 | 14 | 50,780,115  | 1.43E-14 | -0.338 | -0.333 |          |        |  | <i>ATP5S</i>    | Body    |
| cg00276214 | 11 | 67,432,882  | 3.38E-05 | -0.338 | -0.264 |          |        |  | <i>ALDH3B2</i>  | Body    |
| cg01780490 | 2  | 88,620,342  | 6.25E-07 | -0.338 | -0.345 |          |        |  |                 |         |
| cg00064296 | 8  | 88,712,003  | 1.92E-08 | -0.338 | -0.342 |          |        |  |                 |         |
| cg13956907 | 15 | 28,051,262  | 9.22E-10 | -0.338 | -0.307 |          |        |  | <i>OCA2</i>     | Body    |
| cg04645050 | 16 | 86,603,761  | 9.8E-08  | -0.338 | -0.280 |          |        |  |                 |         |
| cg24694665 | 15 | 37,782,428  | 3.06E-10 | -0.338 | -0.348 |          |        |  |                 |         |
| cg00348598 | 7  | 34,117,970  | 1.51E-18 | -0.338 | -0.317 |          |        |  | <i>BMPER</i>    | Body    |
| cg12961607 | 2  | 38,976,250  | 6.2E-19  | -0.338 | -0.345 |          |        |  | <i>SFRS7</i>    | Body    |

|            |    |             |          |        |        |          |        |     |                  |         |
|------------|----|-------------|----------|--------|--------|----------|--------|-----|------------------|---------|
| cg16933813 | 6  | 32,945,317  | 4.76E-10 | -0.338 | -0.369 |          |        |     | <i>BRD2</i>      | Body    |
| cg24052851 | 9  | 90,795,355  | 8.83E-14 | -0.338 | -0.332 |          |        |     |                  |         |
| cg09364980 | 19 | 29,455,913  | 9.5E-07  | -0.338 | -0.367 |          |        |     | <i>LOC148145</i> | TSS200  |
| cg18300008 | 6  | 156,342,156 | 0.000427 | -0.339 | -0.307 |          |        |     |                  |         |
| cg07122986 | 16 | 5,452,280   | 8.11E-06 | -0.339 | -0.317 |          |        |     |                  |         |
| cg13012115 | 11 | 124,254,360 | 7.95E-06 | -0.339 | -0.331 |          |        |     | <i>OR8B2</i>     | TSS1500 |
| cg20908131 | 14 | 98,419,775  | 2.64E-05 | -0.339 | -0.338 |          |        |     | <i>C14orf64</i>  | Body    |
| cg22862656 | 11 | 62,037,659  | 7.3E-16  | -0.339 | -0.313 | 2.86E-36 | -0.257 |     | <i>SCGB2A2</i>   | 1stExon |
| cg19637083 | 4  | 189,860,869 | 0.000283 | -0.340 | -0.284 |          |        |     |                  |         |
| cg14674802 | 2  | 88,585,844  | 1.5E-05  | -0.340 | -0.328 |          |        |     |                  |         |
| cg08906442 | 1  | 246,939,499 | 3.41E-10 | -0.340 | -0.337 |          |        |     |                  |         |
| cg05973555 | 2  | 84,114,418  | 4.97E-07 | -0.340 | -0.343 |          |        |     |                  |         |
| cg27605701 | 16 | 87,030,604  | 5.09E-12 | -0.340 | -0.274 |          |        |     |                  |         |
| cg08108655 | 16 | 1,488,807   | 6.31E-11 | -0.340 | -0.329 |          |        |     | <i>CCDC154</i>   | Body    |
| cg24489370 | 15 | 42,562,638  | 3.56E-13 | -0.340 | -0.315 |          |        |     | <i>TMEM87A</i>   | Body    |
| cg16739580 | 3  | 191,179,074 | 0.000285 | -0.340 | -0.226 | 1.73E-09 | -0.210 |     | <i>PYDC2</i>     | 1stExon |
| cg05687660 | 8  | 106,877,721 | 1.83E-07 | -0.340 | -0.371 |          |        |     |                  |         |
| cg04450606 | 1  | 153,283,317 | 9.7E-07  | -0.340 | -0.318 |          |        | Yes | <i>PGLYRP3</i>   | TSS200  |
| cg12194594 | 13 | 113,426,250 | 4.17E-07 | -0.341 | -0.308 |          |        |     | <i>ATP11A</i>    | Body    |
| cg10830021 | 11 | 3,815,589   | 3.23E-11 | -0.341 | -0.331 |          |        |     | <i>NUP98</i>     | 5'UTR   |
| cg05512111 | 3  | 118,734,756 | 8.59E-08 | -0.341 | -0.315 |          |        |     | <i>IGSF11</i>    | Body    |
| cg19925887 | X  | 151,146,909 | 1.85E-07 | -0.341 | -0.335 |          |        |     |                  |         |
| cg03015368 | 16 | 10,065,222  | 8.56E-10 | -0.341 | -0.333 |          |        |     | <i>GRIN2A</i>    | Body    |
| cg03890505 | 12 | 127,221,782 | 0.000343 | -0.341 | -0.297 |          |        |     |                  |         |
| cg10861033 | X  | 3,229,472   | 0.006128 | -0.341 | -0.227 |          |        |     | <i>MXRA5</i>     | Body    |
| cg13301731 | 12 | 128,796,190 | 0.000135 | -0.341 | -0.293 |          |        |     | <i>TMEM132C</i>  | Body    |
| cg04115006 | 14 | 105,055,171 | 1.17E-07 | -0.341 | -0.260 |          |        |     | <i>C14orf180</i> | 3'UTR   |
| cg13760060 | 14 | 73,212,577  | 3.2E-05  | -0.341 | -0.362 |          |        |     | <i>DPF3</i>      | Body    |
| cg04425614 | 14 | 105,055,026 | 1.39E-13 | -0.341 | -0.322 |          |        |     | <i>C14orf180</i> | Body    |
| cg05187154 | 16 | 9,828,141   | 4.35E-06 | -0.341 | -0.333 |          |        |     |                  |         |
| cg19487455 | X  | 146,340,510 | 0.000647 | -0.342 | -0.309 |          |        |     | <i>MIR509-1</i>  | TSS200  |
| cg16351441 | 11 | 63,057,592  | 0.000007 | -0.342 | -0.329 |          |        |     | <i>SLC22A10</i>  | 5'UTR   |
| cg00394221 | 1  | 157,772,525 | 0.000155 | -0.342 | -0.237 |          |        |     | <i>FCRL1</i>     | Body    |
| cg10510935 | 1  | 4,059,661   | 1.28E-10 | -0.342 | -0.273 |          |        |     |                  |         |



|            |    |             |          |        |        |  |  |  |                  |         |
|------------|----|-------------|----------|--------|--------|--|--|--|------------------|---------|
| cg04888174 | 12 | 33,139,435  | 1.68E-06 | -0.342 | -0.311 |  |  |  |                  |         |
| cg13690590 | 19 | 16,013,361  | 1.52E-14 | -0.342 | -0.333 |  |  |  |                  |         |
| cg06835509 | 16 | 23,939,098  | 2.34E-06 | -0.342 | -0.388 |  |  |  | <i>PRKCB</i>     | Body    |
| cg17551002 | 1  | 158,517,849 | 6.16E-09 | -0.342 | -0.334 |  |  |  | <i>OR6Y1</i>     | 1stExon |
| cg16151261 | 18 | 75,691,297  | 4.43E-08 | -0.342 | -0.276 |  |  |  |                  |         |
| cg05692746 | 2  | 100,937,584 | 6.61E-19 | -0.342 | -0.332 |  |  |  | <i>LONRF2</i>    | Body    |
| cg06098276 | 17 | 76,171,208  | 3.85E-15 | -0.342 | -0.325 |  |  |  | <i>TK1</i>       | Body    |
| cg10982861 | X  | 107,018,095 | 1.35E-07 | -0.342 | -0.302 |  |  |  | <i>TSC22D3</i>   | Body    |
| cg00491523 | 16 | 6,913,336   | 2.71E-09 | -0.342 | -0.359 |  |  |  | <i>A2BP1</i>     | 5'UTR   |
| cg25258002 | 11 | 57,245,109  | 2.74E-13 | -0.342 | -0.279 |  |  |  |                  |         |
| cg08244156 | 1  | 153,283,712 | 0.000383 | -0.343 | -0.224 |  |  |  | <i>PGLYRP3</i>   | TSS1500 |
| cg27546431 | 17 | 1,372,751   | 0.032191 | -0.343 | -0.258 |  |  |  | <i>MYO1C</i>     | Body    |
| cg25349643 | 1  | 198,828,157 | 2.3E-05  | -0.343 | -0.272 |  |  |  | <i>MIR181B1</i>  | TSS200  |
| cg20950033 | 14 | 20,898,781  | 2.4E-11  | -0.343 | -0.324 |  |  |  | <i>KLHL33</i>    | Body    |
| cg21620606 | 4  | 1,342,894   | 3.7E-10  | -0.343 | -0.363 |  |  |  | <i>KIAA1530</i>  | Body    |
| cg06463097 | 17 | 80,038,921  | 0.005841 | -0.343 | -0.176 |  |  |  | <i>FASN</i>      | Body    |
| cg24365896 | 11 | 69,974,745  | 4.87E-08 | -0.343 | -0.285 |  |  |  | <i>ANO1</i>      | Body    |
| cg12555816 | 11 | 124,253,092 | 1.11E-05 | -0.343 | -0.353 |  |  |  | <i>OR8B2</i>     | 1stExon |
| cg21428001 | 2  | 119,066,603 | 1.35E-08 | -0.343 | -0.376 |  |  |  |                  |         |
| cg06958184 | 12 | 132,963,993 | 8.63E-14 | -0.343 | -0.321 |  |  |  |                  |         |
| cg11197206 | 14 | 100,504,766 | 4.38E-11 | -0.343 | -0.369 |  |  |  |                  |         |
| cg15300436 | 2  | 2,321,788   | 6.65E-06 | -0.344 | -0.336 |  |  |  | <i>LOC730811</i> | TSS1500 |
| cg18498622 | X  | 151,810,246 | 7.02E-05 | -0.344 | -0.359 |  |  |  | <i>GABRQ</i>     | Body    |
| cg06516947 | 22 | 45,148,223  | 2.98E-11 | -0.344 | -0.340 |  |  |  | <i>ARHGAP8</i>   | TSS1500 |
| cg25361447 | 6  | 33,264,834  | 8.54E-08 | -0.344 | -0.261 |  |  |  | <i>RGL2</i>      | Body    |
| cg05852625 | 12 | 128,748,582 | 0.000135 | -0.344 | -0.250 |  |  |  |                  |         |
| cg00104707 | 15 | 89,175,107  | 1.14E-19 | -0.344 | -0.314 |  |  |  | <i>AEN</i>       | 3'UTR   |
| cg22115892 | 4  | 177,198,411 | 0.002994 | -0.344 | -0.409 |  |  |  |                  |         |
| cg09115960 | 16 | 1,481,278   | 2.81E-21 | -0.344 | -0.353 |  |  |  |                  |         |
| cg06992846 | 8  | 126,448,837 | 1.37E-13 | -0.345 | -0.359 |  |  |  | <i>TRIB1</i>     | 3'UTR   |
| cg01395254 | 2  | 2,336,428   | 2.36E-05 | -0.345 | -0.326 |  |  |  | <i>MYT1L</i>     | TSS1500 |
| cg11157172 | 1  | 3,210,417   | 0.008295 | -0.345 | -0.155 |  |  |  | <i>PRDM16</i>    | Body    |
| cg20776543 | 7  | 921,156     | 6.31E-09 | -0.345 | -0.358 |  |  |  | <i>C7orf20</i>   | Body    |
| cg25602651 | X  | 27,999,728  | 8.26E-09 | -0.345 | -0.274 |  |  |  | <i>DCAF8L1</i>   | TSS200  |

|            |    |             |          |        |        |            |        |     |           |         |
|------------|----|-------------|----------|--------|--------|------------|--------|-----|-----------|---------|
| cg25941151 | 11 | 88,910,913  | 3.96E-07 | -0.345 | -0.345 |            |        |     | TYR       | TSS200  |
| cg25308354 | 8  | 1,048,765   | 0.00108  | -0.345 | -0.387 |            |        |     |           |         |
| cg25068915 | 17 | 80,052,907  | 4.71E-13 | -0.345 | -0.310 |            |        |     | FASN      | Body    |
| cg07236958 | 8  | 140,624,727 | 8.78E-14 | -0.345 | -0.319 |            |        |     |           |         |
| cg04557423 | 8  | 128,494,728 | 2.51E-05 | -0.345 | -0.230 |            |        |     | LOC727677 | TSS1500 |
| cg21106505 | 11 | 562,547     | 7.7E-12  | -0.345 | -0.359 |            |        |     | RASSF7    | Body    |
| cg04992191 | 1  | 238,341,559 | 0.000332 | -0.345 | -0.244 |            |        |     |           |         |
| cg03366891 | 16 | 24,372,874  | 6.1E-06  | -0.346 | -0.333 |            |        |     | CACNG3    | Body    |
| cg24009065 | 20 | 44,351,095  | 0.000487 | -0.346 | -0.256 |            |        | Yes | SPINT4    | 1stExon |
| cg25244356 | 7  | 90,042,240  | 7.08E-22 | -0.346 | -0.304 |            |        |     | CLDN12    | Body    |
| cg25993152 | X  | 52,840,736  | 0.00062  | -0.346 | -0.264 | 0.00000618 | -0.139 |     | XAGE5     | TSS1500 |
| cg06717750 | 16 | 667,157     | 0.01075  | -0.346 | -0.404 |            |        |     | RAB40C    | Body    |
| cg03190578 | 3  | 13,517,897  | 3.62E-19 | -0.346 | -0.331 |            |        |     |           |         |
| cg25338036 | 8  | 3,047,536   | 0.002287 | -0.346 | -0.263 |            |        |     | CSMD1     | Body    |
| cg09664215 | 1  | 158,325,254 | 4.54E-06 | -0.346 | -0.330 |            |        |     | CD1E      | Body    |
| cg25503540 | 17 | 80,051,901  | 5.64E-12 | -0.346 | -0.320 |            |        |     | FASN      | Body    |
| cg05006092 | 17 | 76,166,303  | 2.56E-13 | -0.346 | -0.343 |            |        |     | SYNGR2    | Body    |
| cg24513381 | 1  | 170,653,323 | 1.04E-05 | -0.347 | -0.346 |            |        |     | PRRX1     | Body    |
| cg13923497 | 2  | 153,258,890 | 1.5E-09  | -0.347 | -0.332 |            |        |     | FMNL2     | Body    |
| cg03766872 | 11 | 67,209,552  | 5.79E-07 | -0.347 | -0.254 |            |        |     | CORO1B    | Body    |
| cg23045972 | 3  | 118,230,228 | 1.23E-11 | -0.347 | -0.370 |            |        |     |           |         |
| cg11486694 | 10 | 53,367,157  | 0.000604 | -0.347 | -0.252 |            |        |     | PRKG1     | Body    |
| cg10330955 | 15 | 85,150,097  | 6.74E-13 | -0.347 | -0.357 |            |        |     | ZSCAN2    | Body    |
| cg09255505 | 14 | 105,268,669 | 7.4E-08  | -0.347 | -0.270 |            |        |     | ZBTB42    | Body    |
| cg12647861 | X  | 103,268,125 | 2.37E-10 | -0.347 | -0.329 |            |        |     | MIR1256   | Body    |
| cg08266311 | 4  | 37,990,443  | 1.44E-09 | -0.347 | -0.301 |            |        |     | TBC1D1    | Body    |
| cg07782620 | 4  | 155,105,000 | 6.12E-05 | -0.347 | -0.279 |            |        |     |           |         |
| cg27056742 | 1  | 4,231,293   | 3.81E-06 | -0.347 | -0.323 |            |        |     |           |         |
| cg06821641 | 1  | 2,016,915   | 1.24E-14 | -0.348 | -0.304 |            |        |     | PRKCZ     | Body    |
| cg14531576 | 1  | 186,095,757 | 2.3E-10  | -0.348 | -0.309 |            |        |     | HMCN1     | Body    |
| cg08155625 | 21 | 44,851,244  | 4.73E-05 | -0.348 | -0.227 |            |        |     |           |         |
| cg25654695 | 19 | 2,273,216   | 8.07E-33 | -0.348 | -0.340 |            |        |     | OAZ1      | 3'UTR   |
| cg24670000 | 17 | 72,370,729  | 3.71E-10 | -0.348 | -0.279 |            |        |     |           |         |
| cg20543651 | 8  | 55,918,395  | 1.81E-05 | -0.348 | -0.362 |            |        |     |           |         |

|            |    |             |          |        |        |  |  |     |                 |         |
|------------|----|-------------|----------|--------|--------|--|--|-----|-----------------|---------|
| cg17862447 | 2  | 23,633,680  | 0.000484 | -0.348 | -0.365 |  |  |     | <i>KLHL29</i>   | 5'UTR   |
| cg02303068 | 12 | 131,831,940 | 0.00256  | -0.348 | -0.241 |  |  |     |                 |         |
| cg09795081 | 6  | 34,392,105  | 1.24E-09 | -0.349 | -0.289 |  |  |     | <i>RPS10</i>    | Body    |
| cg10292430 | 10 | 121,297,031 | 1.05E-27 | -0.349 | -0.369 |  |  |     | <i>RGS10</i>    | TSS1500 |
| cg12808290 | 12 | 127,206,290 | 0.000427 | -0.349 | -0.276 |  |  |     |                 |         |
| cg04683330 | 17 | 80,041,239  | 0.001012 | -0.349 | -0.216 |  |  |     | <i>FASN</i>     | Body    |
| cg24306397 | 7  | 93,718,680  | 4.9E-26  | -0.349 | -0.355 |  |  |     |                 |         |
| cg19006211 | 2  | 116,183,919 | 4.27E-08 | -0.349 | -0.319 |  |  |     | <i>DPP10</i>    | Body    |
| cg16600934 | 14 | 105,258,761 | 8.36E-13 | -0.349 | -0.345 |  |  | Yes | <i>AKT1</i>     | Body    |
| cg20268857 | 1  | 158,687,431 | 4.3E-06  | -0.349 | -0.354 |  |  |     | <i>OR6K3</i>    | 1stExon |
| cg23026228 | 6  | 159,739,091 | 4.6E-06  | -0.349 | -0.373 |  |  |     |                 |         |
| cg13006360 | 4  | 175,752,781 | 0.000211 | -0.349 | -0.316 |  |  |     |                 |         |
| cg06275635 | 1  | 153,283,994 | 0.000213 | -0.349 | -0.300 |  |  |     | <i>PGLYRP3</i>  | TSS1500 |
| cg16968020 | X  | 151,374,946 | 5.44E-13 | -0.349 | -0.334 |  |  |     | <i>GABRA3</i>   | Body    |
| cg19014368 | 12 | 131,197,049 | 2.19E-08 | -0.349 | -0.336 |  |  | Yes |                 |         |
| cg20091405 | 11 | 124,370,625 | 2.97E-06 | -0.350 | -0.319 |  |  |     |                 |         |
| cg21616051 | 4  | 987,303     | 3.23E-10 | -0.350 | -0.307 |  |  |     | <i>IDUA</i>     | Body    |
| cg11143092 | 2  | 88,647,633  | 9.75E-08 | -0.350 | -0.363 |  |  |     |                 |         |
| cg04075546 | 7  | 54,143,022  | 1.29E-06 | -0.350 | -0.347 |  |  |     |                 |         |
| cg02175321 | 11 | 103,930,844 | 5.15E-06 | -0.350 | -0.348 |  |  |     | <i>PDGFD</i>    | Body    |
| cg19538335 | X  | 52,898,126  | 8.32E-10 | -0.350 | -0.340 |  |  |     | <i>XAGE3</i>    | TSS1500 |
| cg00049102 | 13 | 72,420,299  | 2.51E-11 | -0.350 | -0.363 |  |  |     | <i>DACH1</i>    | Body    |
| cg04547809 | 19 | 51,304,161  | 1.23E-15 | -0.350 | -0.305 |  |  |     | <i>SNORD88A</i> | TSS1500 |
| cg13609694 | 9  | 131,058,235 | 1.74E-09 | -0.351 | -0.289 |  |  |     |                 |         |
| cg02349468 | 5  | 1,093,661   | 8.74E-09 | -0.351 | -0.321 |  |  |     | <i>SLC12A7</i>  | Body    |
| cg20420873 | 13 | 97,639,223  | 4.04E-05 | -0.351 | -0.395 |  |  |     | <i>OXGR1</i>    | Body    |
| cg21894356 | 6  | 5,425,832   | 0.000656 | -0.351 | -0.274 |  |  |     | <i>FARS2</i>    | Body    |
| cg25690922 | 2  | 25,038,389  | 1.94E-15 | -0.351 | -0.350 |  |  |     | <i>CENPO</i>    | Body    |
| cg15126733 | 11 | 562,188     | 6.3E-07  | -0.351 | -0.359 |  |  |     | <i>RASSF7</i>   | Body    |
| cg15693572 | 3  | 22,412,385  | 1.11E-13 | -0.351 | -0.306 |  |  |     |                 |         |
| cg12305265 | 6  | 162,065,571 | 0.000132 | -0.351 | -0.300 |  |  |     | <i>PARK2</i>    | Body    |
| cg25730098 | 19 | 56,346,628  | 9.54E-08 | -0.352 | -0.341 |  |  |     | <i>NLRP11</i>   | 5'UTR   |
| cg09448880 | 1  | 153,283,841 | 1.65E-05 | -0.352 | -0.263 |  |  |     | <i>PGLYRP3</i>  | TSS1500 |
| cg11429271 | 15 | 45,722,346  | 1.05E-09 | -0.352 | -0.296 |  |  |     | <i>C15orf48</i> | TSS1500 |

|            |    |             |          |        |        |  |  |  |                     |         |
|------------|----|-------------|----------|--------|--------|--|--|--|---------------------|---------|
| cg13995599 | 13 | 113,426,270 | 2.37E-07 | -0.352 | -0.325 |  |  |  | <i>ATP11A</i>       | Body    |
| cg07133174 | 21 | 38,360,850  | 3.27E-10 | -0.352 | -0.317 |  |  |  | <i>HLCS</i>         | 5'UTR   |
| cg04055238 | 20 | 56,251,166  | 0.000584 | -0.352 | -0.341 |  |  |  | <i>PMEPA1</i>       | 5'UTR   |
| cg06353069 | 2  | 238,500,081 | 3.09E-17 | -0.352 | -0.308 |  |  |  | <i>RAB17</i>        | TSS1500 |
| cg11155489 | 17 | 32,613,298  | 8.16E-14 | -0.352 | -0.358 |  |  |  | <i>CCL11</i>        | Body    |
| cg26378179 | 14 | 87,477,349  | 5.72E-09 | -0.352 | -0.331 |  |  |  |                     |         |
| cg04613080 | X  | 150,903,211 | 5.38E-08 | -0.352 | -0.334 |  |  |  | <i>CNGA2</i>        | TSS200  |
| cg07176168 | 1  | 59,085,716  | 3.54E-15 | -0.352 | -0.339 |  |  |  |                     |         |
| cg04509266 | 1  | 207,991,597 | 4.32E-07 | -0.352 | -0.270 |  |  |  | <i>LOC148696</i>    | TSS200  |
| cg15810386 | 5  | 31,362,491  | 1.06E-16 | -0.353 | -0.349 |  |  |  |                     |         |
| cg20646846 | 11 | 1,673,604   | 0.005299 | -0.353 | -0.258 |  |  |  | <i>HCCA2</i>        | Body    |
| cg03393350 | 8  | 72,780,617  | 0.000117 | -0.353 | -0.348 |  |  |  |                     |         |
| cg15685941 | 3  | 52,723,104  | 1.06E-12 | -0.353 | -0.350 |  |  |  | <i>GNL3</i>         | Body    |
| cg25704253 | X  | 70,434,651  | 1.64E-23 | -0.353 | -0.320 |  |  |  | <i>BCYRN1</i>       | Body    |
| cg19596804 | 1  | 238,540,640 | 1.07E-05 | -0.353 | -0.329 |  |  |  |                     |         |
| cg25628461 | 4  | 687,023     | 1.08E-25 | -0.353 | -0.347 |  |  |  |                     |         |
| cg22228988 | 12 | 126,940,557 | 5.15E-06 | -0.354 | -0.368 |  |  |  | <i>LOC100128554</i> | Body    |
| cg00042156 | 10 | 42,970,842  | 3.03E-09 | -0.354 | -0.327 |  |  |  | <i>LOC84856</i>     | TSS200  |
| cg06550539 | 10 | 134,698,937 | 0.003098 | -0.354 | -0.164 |  |  |  |                     |         |
| cg06340161 | 16 | 46,962,962  | 1.95E-07 | -0.354 | -0.335 |  |  |  | <i>GPT2</i>         | 3'UTR   |
| cg18739944 | 3  | 168,004,541 | 2.88E-06 | -0.354 | -0.346 |  |  |  | <i>C3orf50</i>      | Body    |
| cg14515517 | 10 | 26,226,964  | 7.32E-06 | -0.354 | -0.355 |  |  |  | <i>MYO3A</i>        | 5'UTR   |
| cg04311653 | 10 | 133,204,241 | 0.022152 | -0.354 | -0.128 |  |  |  |                     |         |
| cg25423135 | 17 | 80,054,237  | 1.9E-35  | -0.355 | -0.345 |  |  |  | <i>FASN</i>         | Body    |
| cg21018156 | 6  | 134,061,814 | 6.68E-05 | -0.355 | -0.330 |  |  |  |                     |         |
| cg07587771 | 11 | 130,933,979 | 1.91E-06 | -0.355 | -0.267 |  |  |  |                     |         |
| cg13570284 | 15 | 87,807,847  | 1.19E-05 | -0.355 | -0.329 |  |  |  |                     |         |
| cg15965094 | 17 | 2,898,796   | 2.37E-15 | -0.355 | -0.329 |  |  |  | <i>RAP1GAP2</i>     | Body    |
| cg22277102 | 19 | 2,591,194   | 1.05E-16 | -0.355 | -0.341 |  |  |  | <i>GNG7</i>         | 5'UTR   |
| cg02272968 | 6  | 32,015,773  | 5.43E-09 | -0.355 | -0.270 |  |  |  | <i>TNXB</i>         | Body    |
| cg17129554 | 17 | 76,993,272  | 6.28E-15 | -0.355 | -0.339 |  |  |  | <i>CANT1</i>        | Body    |
| cg12715285 | 1  | 3,504,125   | 0.003864 | -0.356 | -0.444 |  |  |  | <i>MEGF6</i>        | Body    |
| cg00524676 | 12 | 34,537,250  | 5.66E-06 | -0.356 | -0.352 |  |  |  |                     |         |
| cg01733284 | 1  | 158,391,119 | 3.87E-09 | -0.356 | -0.326 |  |  |  | <i>OR10K2</i>       | TSS1500 |

|            |    |             |          |        |        |  |  |  |     |                           |         |
|------------|----|-------------|----------|--------|--------|--|--|--|-----|---------------------------|---------|
| cg03331715 | 12 | 104,689,087 | 1.6E-18  | -0.356 | -0.370 |  |  |  |     | <i>TXNRD1</i>             | 5'UTR   |
| cg08852641 | 19 | 41,510,098  | 3.88E-10 | -0.356 | -0.293 |  |  |  |     | <i>CYP2B6</i>             | Body    |
| cg25066972 | 14 | 82,002,568  | 2.77E-15 | -0.356 | -0.334 |  |  |  |     |                           |         |
| cg22969666 | 14 | 97,688,014  | 1.25E-08 | -0.356 | -0.343 |  |  |  |     |                           |         |
| cg17032587 | X  | 150,903,247 | 2.54E-06 | -0.356 | -0.323 |  |  |  |     | <i>CNGA2</i>              | 1stExon |
| cg13224161 | 6  | 33,141,279  | 5.23E-07 | -0.357 | -0.230 |  |  |  |     | <i>COL11A2</i>            | Body    |
| cg06898823 | 11 | 121,665,583 | 0.004459 | -0.357 | -0.309 |  |  |  |     |                           |         |
| cg05570237 | 21 | 27,934,499  | 2.07E-11 | -0.357 | -0.341 |  |  |  |     | <i>CYYR1</i>              | Body    |
| cg10842557 | 8  | 72,824,512  | 2.53E-09 | -0.358 | -0.375 |  |  |  |     |                           |         |
| cg05586863 | 16 | 5,911,262   | 6.89E-07 | -0.358 | -0.357 |  |  |  |     |                           |         |
| cg05919685 | 1  | 159,556,997 | 7.46E-14 | -0.358 | -0.366 |  |  |  |     | <i>APCS</i>               | TSS1500 |
| cg17590135 | 2  | 48,647,546  | 2.28E-05 | -0.358 | -0.295 |  |  |  |     |                           |         |
| cg24560729 | 4  | 1,342,394   | 3.01E-06 | -0.358 | -0.410 |  |  |  |     | <i>KIAA1530</i>           | Body    |
| cg27460534 | 17 | 80,046,302  | 0.002252 | -0.358 | -0.206 |  |  |  |     | <i>FASN</i>               | Body    |
| cg14705695 | 11 | 88,911,467  | 1.01E-05 | -0.358 | -0.289 |  |  |  |     | <i>TYR</i>                | 1stExon |
| cg26337841 | 1  | 37,329,331  | 1.85E-06 | -0.358 | -0.282 |  |  |  |     | <i>GRIK3</i>              | Body    |
| cg23303246 | 11 | 131,640,135 | 2.64E-05 | -0.358 | -0.336 |  |  |  |     | <i>NTM</i>                | Body    |
| cg11884711 | 17 | 76,997,364  | 1.01E-10 | -0.358 | -0.342 |  |  |  |     | <i>CANT1</i>              | 5'UTR   |
| cg11054774 | 11 | 824,777     | 4.98E-16 | -0.358 | -0.361 |  |  |  | Yes | <i>PNPLA2</i>             | Body    |
| cg10647025 | X  | 145,079,517 | 2.59E-09 | -0.358 | -0.349 |  |  |  |     | <i>MIR892A</i>            | TSS1500 |
| cg16773115 | 8  | 80,992,750  | 2.48E-10 | -0.358 | -0.331 |  |  |  |     | <i>TPD52</i>              | Body    |
| cg14162629 | 7  | 2,720,394   | 1.17E-11 | -0.359 | -0.258 |  |  |  |     | <i>AMZ1</i>               | 5'UTR   |
| cg25007511 | 11 | 108,994,504 | 1.53E-05 | -0.359 | -0.349 |  |  |  |     |                           |         |
| cg08544192 | 3  | 147,656,523 | 1.23E-13 | -0.359 | -0.389 |  |  |  |     |                           |         |
| cg05944877 | 16 | 24,197,863  | 0.000111 | -0.359 | -0.373 |  |  |  |     | <i>PRKCB</i>              | Body    |
| cg06394109 | 16 | 1,152,511   | 0.009561 | -0.359 | -0.271 |  |  |  |     |                           |         |
| cg25026904 | 4  | 168,829,894 | 2.79E-16 | -0.359 | -0.355 |  |  |  |     |                           |         |
| cg09225287 | 7  | 80,549,171  | 1.65E-10 | -0.359 | -0.345 |  |  |  |     | <i>SEMA3C</i>             | TSS1500 |
| cg11666040 | 10 | 135,012,454 | 0.001001 | -0.360 | -0.125 |  |  |  |     | <i>KNDC1</i>              | Body    |
| cg23348723 | 7  | 31,725,748  | 0.00028  | -0.360 | -0.281 |  |  |  |     | <i>C7orf16</i>            | TSS1500 |
| cg11479380 | 7  | 115,609,683 | 0.002512 | -0.360 | -0.307 |  |  |  |     | <i>TFEC</i>               | Body    |
| cg16210461 | 19 | 22,994,561  | 7.68E-07 | -0.360 | -0.331 |  |  |  |     |                           |         |
| cg01577083 | 16 | 5,486,268   | 6.47E-07 | -0.360 | -0.349 |  |  |  |     |                           |         |
| cg16721321 | 4  | 1,202,696   | 2.31E-09 | -0.360 | -0.308 |  |  |  |     | <i>LOC100130872-SPON2</i> | TSS200  |

|            |    |             |          |        |        |          |        |     |                  |         |
|------------|----|-------------|----------|--------|--------|----------|--------|-----|------------------|---------|
| cg24874602 | 4  | 16,960,938  | 5.81E-09 | -0.360 | -0.339 |          |        |     |                  |         |
| cg26509022 | 15 | 101,419,296 | 0.001506 | -0.361 | -0.277 | 5.28E-15 | -0.162 |     | <i>ALDH1A3</i>   | TSS1500 |
| cg26308909 | 7  | 2,233,090   | 1.23E-13 | -0.361 | -0.329 |          |        |     | <i>MAD1L1</i>    | Body    |
| cg05248742 | 16 | 24,142,386  | 0.000606 | -0.361 | -0.369 |          |        |     | <i>PRKCB</i>     | Body    |
| cg15323840 | 6  | 158,404,061 | 3.42E-15 | -0.361 | -0.360 |          |        |     | <i>SYNJ2</i>     | Body    |
| cg10310168 | 1  | 4,376,380   | 1.77E-07 | -0.361 | -0.310 |          |        |     |                  |         |
| cg13312576 | 3  | 112,392,531 | 5.15E-08 | -0.361 | -0.341 |          |        | Yes |                  |         |
| cg00713286 | 17 | 2,868,887   | 2.85E-18 | -0.361 | -0.353 |          |        |     | <i>RAP1GAP2</i>  | Body    |
| cg21291134 | 1  | 159,558,512 | 1.01E-12 | -0.361 | -0.352 |          |        |     | <i>APCS</i>      | 3'UTR   |
| cg22158723 | 17 | 80,051,063  | 0.000225 | -0.362 | -0.281 |          |        |     | <i>FASN</i>      | Body    |
| cg20674248 | 1  | 157,738,450 | 1.99E-08 | -0.362 | -0.324 |          |        |     | <i>FCRL2</i>     | Body    |
| cg02988312 | 4  | 1,342,161   | 0.003817 | -0.362 | -0.376 |          |        |     | <i>KIAA1530</i>  | Body    |
| cg05235610 | 2  | 52,860,117  | 1.24E-05 | -0.362 | -0.333 |          |        |     |                  |         |
| cg09051513 | 11 | 824,257     | 1.63E-16 | -0.362 | -0.375 |          |        |     | <i>PNPLA2</i>    | Body    |
| cg04625975 | 10 | 44,285,864  | 0.00021  | -0.362 | -0.356 |          |        |     | <i>HNRNPA3P1</i> | Body    |
| cg02616769 | 3  | 22,348,099  | 1.78E-05 | -0.363 | -0.368 |          |        |     |                  |         |
| cg26286839 | 5  | 79,378,955  | 5.06E-12 | -0.363 | -0.365 |          |        |     | <i>THBS4</i>     | Body    |
| cg13735018 | 6  | 158,404,121 | 1.54E-10 | -0.363 | -0.375 |          |        |     | <i>SYNJ2</i>     | Body    |
| cg21915828 | 19 | 1,992,866   | 2.55E-06 | -0.363 | -0.348 |          |        |     | <i>BTBD2</i>     | Body    |
| cg17609887 | 7  | 157,053,014 | 1.05E-14 | -0.363 | -0.332 |          |        |     | <i>UBE3C</i>     | Body    |
| cg03344433 | 5  | 84,126,213  | 0.000262 | -0.364 | -0.346 |          |        |     |                  |         |
| cg16255697 | X  | 113,997,530 | 8.25E-15 | -0.364 | -0.390 |          |        |     | <i>HTR2C</i>     | Body    |
| cg23960736 | 1  | 4,171,594   | 4.25E-05 | -0.364 | -0.303 |          |        |     |                  |         |
| cg13915719 | 2  | 4,976,851   | 5.64E-14 | -0.364 | -0.308 |          |        |     |                  |         |
| cg01993552 | 19 | 46,584,209  | 6.75E-11 | -0.364 | -0.360 |          |        |     |                  |         |
| cg07457820 | 3  | 77,267,467  | 5.58E-06 | -0.364 | -0.376 |          |        |     | <i>ROBO2</i>     | Body    |
| cg19533416 | 21 | 42,860,217  | 5.75E-14 | -0.364 | -0.340 |          |        |     | <i>TMPRSS2</i>   | Body    |
| cg07272677 | 4  | 186,741,447 | 5.85E-07 | -0.364 | -0.321 |          |        |     | <i>SORBS2</i>    | 5'UTR   |
| cg21873275 | 1  | 149,069,813 | 0.006728 | -0.364 | -0.236 |          |        |     |                  |         |
| cg08390979 | 16 | 6,094,220   | 5.85E-06 | -0.364 | -0.376 |          |        |     | <i>A2BP1</i>     | 5'UTR   |
| cg06176750 | 11 | 7,112,356   | 9.56E-07 | -0.365 | -0.390 |          |        |     | <i>RBMXL2</i>    | 3'UTR   |
| cg15597136 | 2  | 242,128,753 | 0.001241 | -0.365 | -0.244 |          |        |     | <i>ANO7</i>      | Body    |
| cg20482334 | 17 | 80,048,531  | 0.000874 | -0.365 | -0.233 |          |        |     | <i>FASN</i>      | Body    |
| cg07230486 | 7  | 11,012,873  | 1.03E-07 | -0.365 | -0.390 |          |        |     | <i>PHF14</i>     | TSS1500 |

|            |    |             |          |        |        |  |  |  |                   |         |
|------------|----|-------------|----------|--------|--------|--|--|--|-------------------|---------|
| cg06834698 | 11 | 7,961,985   | 2.88E-08 | -0.365 | -0.329 |  |  |  | <i>OR10A3</i>     | TSS1500 |
| cg08297393 | 2  | 100,937,505 | 1.86E-18 | -0.365 | -0.356 |  |  |  | <i>LONRF2</i>     | Body    |
| cg03761113 | 1  | 157,811,724 | 6.85E-07 | -0.366 | -0.354 |  |  |  | <i>CD5L</i>       | TSS200  |
| cg13208054 | 17 | 25,936,354  | 0.004328 | -0.366 | -0.164 |  |  |  | <i>KSR1</i>       | Body    |
| cg24626659 | 10 | 134,754,286 | 0.003755 | -0.366 | -0.338 |  |  |  | <i>C10orf93</i>   | Body    |
| cg15456742 | 1  | 207,991,729 | 0.002493 | -0.366 | -0.227 |  |  |  | <i>LOC148696</i>  | Body    |
| cg22242614 | 6  | 158,404,082 | 3.88E-15 | -0.366 | -0.379 |  |  |  | <i>SYNJ2</i>      | Body    |
| cg22622425 | 17 | 80,037,106  | 0.00081  | -0.366 | -0.212 |  |  |  | <i>FASN</i>       | Body    |
| cg02210934 | 14 | 105,511,982 | 2.14E-08 | -0.367 | -0.393 |  |  |  |                   |         |
| cg24381587 | 1  | 158,736,312 | 3.71E-11 | -0.367 | -0.375 |  |  |  | <i>OR6N1</i>      | 1stExon |
| cg26479667 | 5  | 3,339,581   | 0.023743 | -0.367 | -0.180 |  |  |  |                   |         |
| cg01270241 | 14 | 97,673,030  | 2.38E-10 | -0.367 | -0.336 |  |  |  |                   |         |
| cg00241002 | 10 | 26,931,912  | 2.3E-11  | -0.367 | -0.355 |  |  |  | <i>LOC731789</i>  | TSS200  |
| cg17543218 | 4  | 77,508,108  | 2.3E-15  | -0.367 | -0.358 |  |  |  | <i>SHROOM3</i>    | Body    |
| cg03151258 | 19 | 15,694,846  | 0.002911 | -0.368 | -0.242 |  |  |  |                   |         |
| cg23044391 | 19 | 7,685,239   | 4.26E-47 | -0.368 | -0.372 |  |  |  | <i>XAB2</i>       | Body    |
| cg23717441 | 3  | 117,999,270 | 4.41E-10 | -0.368 | -0.368 |  |  |  |                   |         |
| cg19791043 | 16 | 1,116,361   | 2.21E-05 | -0.368 | -0.296 |  |  |  | <i>LOC146336</i>  | Body    |
| cg16337457 | 17 | 76,989,680  | 2.7E-06  | -0.368 | -0.351 |  |  |  | <i>CANT1</i>      | Body    |
| cg06128142 | 16 | 46,963,005  | 7.84E-07 | -0.368 | -0.367 |  |  |  | <i>GPT2</i>       | 3'UTR   |
| cg14202783 | 9  | 130,662,561 | 0.000367 | -0.369 | -0.341 |  |  |  | <i>ST6GALNAC6</i> | TSS1500 |
| cg15068800 | 10 | 135,190,706 | 5.11E-29 | -0.369 | -0.358 |  |  |  |                   |         |
| cg22123915 | 1  | 86,047,807  | 6.49E-08 | -0.369 | -0.350 |  |  |  | <i>CYR61</i>      | Body    |
| cg08003353 | 13 | 31,407,120  | 3.9E-27  | -0.369 | -0.361 |  |  |  |                   |         |
| cg01692482 | 20 | 52,198,378  | 2.11E-06 | -0.369 | -0.423 |  |  |  | <i>ZNF217</i>     | 1stExon |
| cg15852352 | 1  | 158,368,889 | 8.54E-06 | -0.369 | -0.346 |  |  |  | <i>OR10T2</i>     | 1stExon |
| cg03441279 | 1  | 147,083,949 | 1.63E-19 | -0.369 | -0.367 |  |  |  | <i>BCL9</i>       | Body    |
| cg27368068 | 3  | 13,515,754  | 3.6E-07  | -0.370 | -0.374 |  |  |  |                   |         |
| cg11109027 | 1  | 207,991,720 | 0.000266 | -0.370 | -0.237 |  |  |  | <i>LOC148696</i>  | TSS200  |
| cg04094178 | 1  | 4,195,569   | 1.74E-10 | -0.370 | -0.343 |  |  |  |                   |         |
| cg12129480 | 1  | 158,549,410 | 1.52E-11 | -0.370 | -0.372 |  |  |  | <i>OR10X1</i>     | 1stExon |
| cg07297322 | 16 | 74,661,825  | 9.55E-15 | -0.370 | -0.333 |  |  |  | <i>RFWD3</i>      | Body    |
| cg08419657 | 11 | 123,894,395 | 2.53E-05 | -0.370 | -0.309 |  |  |  | <i>OR10G9</i>     | 1stExon |
| cg22427208 | 12 | 128,073,115 | 0.000117 | -0.370 | -0.364 |  |  |  |                   |         |

|            |    |             |          |        |        |  |  |  |                  |         |
|------------|----|-------------|----------|--------|--------|--|--|--|------------------|---------|
| cg19029445 | 17 | 907,732     | 3.51E-15 | -0.370 | -0.390 |  |  |  | <i>ABR</i>       | 3'UTR   |
| cg00079302 | 19 | 1,439,985   | 1.01E-17 | -0.371 | -0.380 |  |  |  | <i>RPS15</i>     | Body    |
| cg11611448 | 2  | 127,453,782 | 1.48E-11 | -0.371 | -0.366 |  |  |  | <i>GYPC</i>      | 3'UTR   |
| cg13850654 | 9  | 88,651,476  | 5.01E-29 | -0.371 | -0.359 |  |  |  | <i>GOLM1</i>     | Body    |
| cg26110281 | 11 | 123,885,695 | 1.69E-08 | -0.371 | -0.351 |  |  |  | <i>OR10G4</i>    | TSS1500 |
| cg11969813 | 17 | 79,816,559  | 1.76E-30 | -0.371 | -0.361 |  |  |  | <i>P4HB</i>      | Body    |
| cg03863756 | 21 | 46,859,983  | 1.57E-05 | -0.371 | -0.313 |  |  |  | <i>COL18A1</i>   | Body    |
| cg00440032 | 12 | 127,257,679 | 0.000995 | -0.372 | -0.320 |  |  |  |                  |         |
| cg05345448 | 14 | 105,688,412 | 0.000719 | -0.372 | -0.287 |  |  |  | <i>BRF1</i>      | Body    |
| cg19928493 | 15 | 87,667,390  | 5.19E-05 | -0.372 | -0.319 |  |  |  |                  |         |
| cg15791108 | 17 | 2,653,571   | 1.37E-15 | -0.372 | -0.354 |  |  |  |                  |         |
| cg01612095 | 16 | 88,713,113  | 4.89E-07 | -0.373 | -0.316 |  |  |  | <i>CYBA</i>      | Body    |
| cg19864468 | 2  | 113,346,566 | 1.14E-23 | -0.373 | -0.371 |  |  |  | <i>CHCHD5</i>    | 3'UTR   |
| cg02245566 | 1  | 158,670,617 | 4.27E-07 | -0.374 | -0.348 |  |  |  | <i>OR6K2</i>     | TSS200  |
| cg12072262 | 10 | 129,379,353 | 0.003296 | -0.374 | -0.204 |  |  |  |                  |         |
| cg00459509 | 12 | 128,642,467 | 0.000171 | -0.374 | -0.216 |  |  |  |                  |         |
| cg16354452 | 12 | 131,766,931 | 0.000292 | -0.374 | -0.282 |  |  |  |                  |         |
| cg22482278 | 17 | 80,289,631  | 2.1E-08  | -0.374 | -0.327 |  |  |  | <i>SECTM1</i>    | 5'UTR   |
| cg04923532 | 16 | 4,478,627   | 4.45E-06 | -0.375 | -0.258 |  |  |  | <i>DNAJA3</i>    | Body    |
| cg24643381 | 12 | 43,941,378  | 3.47E-08 | -0.375 | -0.374 |  |  |  | <i>ADAMTS20</i>  | Body    |
| cg05906144 | 10 | 125,521,535 | 0.013453 | -0.375 | -0.261 |  |  |  | <i>CPXM2</i>     | Body    |
| cg27429313 | 10 | 131,514,331 | 1.13E-12 | -0.375 | -0.394 |  |  |  | <i>MGMT</i>      | Body    |
| cg14640525 | 3  | 38,876,856  | 2.63E-10 | -0.375 | -0.376 |  |  |  |                  |         |
| cg05157970 | 17 | 80,048,868  | 4.58E-06 | -0.376 | -0.301 |  |  |  | <i>FASN</i>      | Body    |
| cg25078649 | 6  | 43,478,829  | 0.000844 | -0.376 | -0.284 |  |  |  | <i>C6orf154</i>  | TSS1500 |
| cg22740796 | 10 | 132,461,281 | 0.041013 | -0.376 | -0.176 |  |  |  |                  |         |
| cg24134504 | 18 | 76,639,479  | 8.38E-17 | -0.376 | -0.374 |  |  |  |                  |         |
| cg13453847 | 5  | 5,034,274   | 4.86E-06 | -0.376 | -0.369 |  |  |  | <i>LOC340094</i> | TSS200  |
| cg01983548 | 2  | 234,764,133 | 1.82E-07 | -0.376 | -0.277 |  |  |  | <i>HJURP</i>     | TSS1500 |
| cg03606098 | 1  | 1,690,840   | 1.34E-22 | -0.377 | -0.349 |  |  |  | <i>NADK</i>      | Body    |
| cg09170112 | 12 | 132,102,188 | 0.019275 | -0.377 | -0.156 |  |  |  |                  |         |
| cg14514991 | 1  | 158,737,820 | 6.98E-16 | -0.377 | -0.376 |  |  |  | <i>OR6N1</i>     | TSS1500 |
| cg11538176 | 7  | 157,053,075 | 2.92E-09 | -0.377 | -0.328 |  |  |  | <i>UBE3C</i>     | Body    |
| cg11068289 | 17 | 78,955,884  | 7.46E-08 | -0.378 | -0.320 |  |  |  |                  |         |



|            |    |             |          |        |        |  |  |  |                           |         |
|------------|----|-------------|----------|--------|--------|--|--|--|---------------------------|---------|
| cg23668057 | 17 | 76,164,111  | 7.03E-07 | -0.378 | -0.273 |  |  |  | <i>SYNGR2</i>             | TSS1500 |
| cg01857186 | 11 | 123,811,110 | 0.000462 | -0.378 | -0.304 |  |  |  | <i>OR4D5</i>              | 1stExon |
| cg11751344 | 8  | 92,622,592  | 7.59E-09 | -0.378 | -0.393 |  |  |  |                           |         |
| cg20149780 | 1  | 15,751,063  | 0.000135 | -0.378 | -0.234 |  |  |  | <i>EFHD2</i>              | Body    |
| cg22612448 | 1  | 217,203,173 | 3.83E-15 | -0.378 | -0.378 |  |  |  | <i>ESRRG</i>              | 5'UTR   |
| cg20978923 | 1  | 12,184,574  | 3.75E-08 | -0.379 | -0.346 |  |  |  | <i>TNFRSF8</i>            | Body    |
| cg09790780 | 16 | 7,482,013   | 2.68E-09 | -0.379 | -0.330 |  |  |  | <i>A2BP1</i>              | Body    |
| cg08608780 | 8  | 89,434,982  | 4.61E-07 | -0.379 | -0.344 |  |  |  |                           |         |
| cg22660420 | 10 | 135,190,372 | 4.99E-06 | -0.379 | -0.273 |  |  |  |                           |         |
| cg18391955 | 19 | 51,303,514  | 7.2E-17  | -0.379 | -0.285 |  |  |  | <i>SNORD88A</i>           | TSS1500 |
| cg06719334 | 16 | 7,501,308   | 0.000323 | -0.380 | -0.341 |  |  |  | <i>A2BP1</i>              | Body    |
| cg26457700 | 17 | 80,289,541  | 2.81E-12 | -0.380 | -0.335 |  |  |  | <i>SECTM1</i>             | 5'UTR   |
| cg12280242 | 4  | 4,112,056   | 0.000422 | -0.380 | -0.195 |  |  |  |                           |         |
| cg12620035 | 7  | 73,247,613  | 1E-05    | -0.380 | -0.447 |  |  |  |                           |         |
| cg08758185 | 5  | 150,849,936 | 6.07E-18 | -0.380 | -0.357 |  |  |  | <i>SLC36A1</i>            | Body    |
| cg10537708 | 10 | 134,843,768 | 1.74E-10 | -0.380 | -0.320 |  |  |  |                           |         |
| cg15457037 | 20 | 62,562,848  | 0.002522 | -0.381 | -0.461 |  |  |  | <i>DNAJC5</i>             | Body    |
| cg17124387 | 17 | 77,810,090  | 4.35E-13 | -0.381 | -0.358 |  |  |  | <i>CBX4</i>               | Body    |
| cg03973705 | 16 | 24,174,850  | 6.09E-12 | -0.382 | -0.365 |  |  |  | <i>PRKCB</i>              | Body    |
| cg23317499 | 12 | 130,591,397 | 0.000759 | -0.383 | -0.456 |  |  |  |                           |         |
| cg08595616 | 8  | 142,283,416 | 6.08E-11 | -0.383 | -0.394 |  |  |  |                           |         |
| cg22538757 | 12 | 34,755,126  | 2.99E-14 | -0.383 | -0.360 |  |  |  |                           |         |
| cg24640577 | 1  | 246,939,216 | 4.22E-14 | -0.383 | -0.351 |  |  |  |                           |         |
| cg04139007 | 8  | 124,776,493 | 3.52E-13 | -0.384 | -0.320 |  |  |  |                           |         |
| cg02603518 | 20 | 61,717,939  | 2.23E-07 | -0.384 | -0.305 |  |  |  |                           |         |
| cg23225637 | 17 | 76,989,965  | 3.71E-05 | -0.384 | -0.343 |  |  |  | <i>CANT1</i>              | Body    |
| cg10201735 | 14 | 97,502,302  | 3.73E-10 | -0.384 | -0.400 |  |  |  |                           |         |
| cg16998656 | 7  | 32,114,197  | 0.000221 | -0.385 | -0.357 |  |  |  |                           |         |
| cg17227257 | 4  | 1,202,694   | 2.05E-14 | -0.385 | -0.353 |  |  |  | <i>LOC100130872-SPON2</i> | TSS200  |
| cg09580592 | 17 | 907,643     | 2.85E-25 | -0.386 | -0.399 |  |  |  | <i>ABR</i>                | 3'UTR   |
| cg12268236 | 1  | 3,329,292   | 0.000502 | -0.386 | -0.282 |  |  |  | <i>PRDM16</i>             | Body    |
| cg20662737 | 5  | 4,941,328   | 0.001987 | -0.386 | -0.252 |  |  |  |                           |         |
| cg15604615 | X  | 150,866,552 | 1E-09    | -0.386 | -0.389 |  |  |  | <i>PRRG3</i>              | TSS1500 |
| cg10400174 | 14 | 101,495,758 | 6.51E-07 | -0.387 | -0.411 |  |  |  | <i>MIR494</i>             | TSS1500 |

|            |    |             |          |        |        |          |        |  |                 |         |
|------------|----|-------------|----------|--------|--------|----------|--------|--|-----------------|---------|
| cg04813876 | 11 | 103,964,219 | 1.71E-06 | -0.387 | -0.338 |          |        |  | <i>PDGFD</i>    | Body    |
| cg15112475 | 7  | 1,198,522   | 3.34E-25 | -0.387 | -0.335 |          |        |  | <i>ZFAND2A</i>  | 5'UTR   |
| cg27616109 | 17 | 34,093,677  | 2.24E-07 | -0.388 | -0.359 |          |        |  | <i>MMP28</i>    | Body    |
| cg02560310 | 20 | 60,578,131  | 1.46E-21 | -0.389 | -0.403 |          |        |  | <i>TAF4</i>     | Body    |
| cg26014409 | 1  | 158,324,471 | 1.74E-17 | -0.389 | -0.380 |          |        |  | <i>CD1E</i>     | Body    |
| cg27338089 | 16 | 29,820,515  | 3.47E-21 | -0.389 | -0.391 |          |        |  | <i>MAZ</i>      | Body    |
| cg10201191 | 1  | 3,163,472   | 1.8E-09  | -0.389 | -0.344 |          |        |  | <i>PRDM16</i>   | Body    |
| cg02124524 | 16 | 85,655,007  | 5.95E-22 | -0.390 | -0.396 |          |        |  | <i>KIAA0182</i> | 5'UTR   |
| cg02361803 | 1  | 2,014,371   | 2.13E-59 | -0.390 | -0.366 |          |        |  | <i>PRKCZ</i>    | Body    |
| cg27456185 | 15 | 93,196,011  | 4.8E-10  | -0.391 | -0.404 |          |        |  | <i>FAM174B</i>  | Body    |
| cg11950105 | 17 | 80,050,646  | 9.31E-05 | -0.391 | -0.313 |          |        |  | <i>FASN</i>     | Body    |
| cg17838182 | 17 | 76,991,208  | 9.6E-05  | -0.391 | -0.342 |          |        |  | <i>CANT1</i>    | Body    |
| cg22597771 | X  | 151,336,548 | 1.83E-10 | -0.391 | -0.368 |          |        |  | <i>GABRA3</i>   | 3'UTR   |
| cg10216717 | 12 | 128,899,290 | 1.07E-07 | -0.391 | -0.381 |          |        |  | <i>TMEM132C</i> | Body    |
| cg21478921 | 2  | 242,617,935 | 3.06E-07 | -0.391 | -0.388 |          |        |  | <i>DTYMK</i>    | Body    |
| cg05880897 | X  | 151,129,555 | 1.8E-20  | -0.391 | -0.383 |          |        |  | <i>GABRE</i>    | Body    |
| cg14686949 | X  | 151,129,081 | 2.14E-11 | -0.391 | -0.386 |          |        |  | <i>GABRE</i>    | Body    |
| cg12815916 | 2  | 131,114,432 | 4.1E-15  | -0.392 | -0.412 | 1.07E-25 | -0.217 |  | <i>PTPN18</i>   | Body    |
| cg14143580 | 20 | 29,960,982  | 1.17E-05 | -0.392 | -0.358 |          |        |  | <i>DEFB118</i>  | 3'UTR   |
| cg03207391 | 19 | 18,497,201  | 3.14E-56 | -0.392 | -0.373 |          |        |  | <i>GDF15</i>    | 1stExon |
| cg10948698 | 12 | 127,226,034 | 3.49E-09 | -0.392 | -0.352 |          |        |  |                 |         |
| cg08691323 | 5  | 54,826,683  | 4.45E-27 | -0.392 | -0.375 |          |        |  | <i>PPAP2A</i>   | Body    |
| cg27137084 | 12 | 129,035,348 | 1.37E-08 | -0.392 | -0.388 |          |        |  | <i>TMEM132C</i> | Body    |
| cg12438155 | 1  | 4,223,893   | 9.61E-05 | -0.393 | -0.238 |          |        |  |                 |         |
| cg25889581 | 4  | 16,708,336  | 1.13E-08 | -0.393 | -0.385 |          |        |  | <i>LDB2</i>     | Body    |
| cg07073096 | 7  | 2,870,441   | 1.44E-25 | -0.393 | -0.374 |          |        |  | <i>GNA12</i>    | Body    |
| cg04540442 | 12 | 34,445,809  | 9.25E-09 | -0.395 | -0.334 |          |        |  |                 |         |
| cg17372657 | 7  | 1,216,933   | 1.76E-15 | -0.395 | -0.346 |          |        |  |                 |         |
| cg14530143 | 11 | 122,179,528 | 5.16E-06 | -0.395 | -0.376 |          |        |  |                 |         |
| cg10222925 | 8  | 88,885,186  | 2.6E-05  | -0.395 | -0.310 |          |        |  | <i>DCAF4L2</i>  | 1stExon |
| cg06259406 | 17 | 80,051,518  | 1.42E-06 | -0.396 | -0.331 |          |        |  | <i>FASN</i>     | Body    |
| cg10161194 | 19 | 3,983,180   | 8.24E-51 | -0.396 | -0.373 |          |        |  | <i>EEF2</i>     | Body    |
| cg22775138 | 10 | 135,008,819 | 0.002899 | -0.397 | -0.249 |          |        |  | <i>KNDC1</i>    | Body    |
| cg06355422 | 22 | 50,013,649  | 0.000136 | -0.397 | -0.260 |          |        |  | <i>C22orf34</i> | Body    |

|            |    |             |          |        |        |  |  |     |                  |         |
|------------|----|-------------|----------|--------|--------|--|--|-----|------------------|---------|
| cg04033390 | 12 | 128,887,209 | 1.41E-06 | -0.398 | -0.365 |  |  |     | <i>TMEM132C</i>  | Body    |
| cg05396584 | 17 | 80,049,347  | 0.001163 | -0.398 | -0.269 |  |  |     | <i>FASN</i>      | Body    |
| cg02753511 | 11 | 69,468,378  | 3.59E-15 | -0.398 | -0.385 |  |  |     | <i>CCND1</i>     | 3'UTR   |
| cg08846245 | 6  | 33,169,606  | 2.35E-19 | -0.398 | -0.411 |  |  |     | <i>SLC39A7</i>   | Body    |
| cg05162456 | 16 | 85,671,457  | 6.56E-41 | -0.398 | -0.389 |  |  |     | <i>KIAA0182</i>  | 5'UTR   |
| cg03936135 | 16 | 86,371,248  | 2.23E-07 | -0.399 | -0.380 |  |  |     | <i>LOC732275</i> | Body    |
| cg23910430 | 12 | 133,353,847 | 2.86E-13 | -0.399 | -0.355 |  |  |     | <i>GOLGA3</i>    | Body    |
| cg09614389 | 20 | 25,450,839  | 0.001964 | -0.399 | -0.165 |  |  |     | <i>NINL</i>      | Body    |
| cg13971140 | 19 | 8,276,488   | 5.55E-16 | -0.399 | -0.390 |  |  |     | <i>LASS4</i>     | 5'UTR   |
| cg20308663 | 13 | 100,523,121 | 6.33E-07 | -0.400 | -0.360 |  |  | Yes | <i>CLYBL</i>     | Body    |
| cg01252526 | 16 | 711,033     | 1.84E-10 | -0.400 | -0.392 |  |  |     | <i>WDR90</i>     | Body    |
| cg05120716 | 16 | 23,881,993  | 8.89E-08 | -0.401 | -0.415 |  |  |     | <i>PRKCB</i>     | Body    |
| cg13316148 | 2  | 191,916,269 | 1.48E-11 | -0.401 | -0.358 |  |  |     | <i>STAT4</i>     | Body    |
| cg06467636 | X  | 150,905,602 | 1.77E-05 | -0.402 | -0.374 |  |  |     | <i>CNGA2</i>     | 5'UTR   |
| cg07196514 | 1  | 158,984,321 | 2.64E-14 | -0.402 | -0.405 |  |  |     | <i>IFI16</i>     | 5'UTR   |
| cg05910415 | 19 | 46,733,041  | 3.84E-21 | -0.402 | -0.374 |  |  |     | <i>IGFL1</i>     | 1stExon |
| cg16486327 | 16 | 85,671,191  | 8.41E-32 | -0.402 | -0.382 |  |  |     | <i>KIAA0182</i>  | 5'UTR   |
| cg23960088 | 5  | 34,006,894  | 0.00259  | -0.403 | -0.316 |  |  |     | <i>AMACR</i>     | Body    |
| cg21641834 | 6  | 5,068,684   | 8.48E-23 | -0.404 | -0.377 |  |  |     |                  |         |
| cg07070466 | X  | 89,176,658  | 0.000106 | -0.404 | -0.353 |  |  |     | <i>TGIF2LX</i>   | TSS1500 |
| cg05699035 | 1  | 215,259,771 | 0.019108 | -0.404 | -0.262 |  |  |     | <i>KCNK2</i>     | Body    |
| cg05758978 | 7  | 44,614,305  | 3.39E-20 | -0.404 | -0.410 |  |  |     | <i>DDX56</i>     | TSS200  |
| cg16205389 | 2  | 239,079,215 | 3.45E-11 | -0.405 | -0.368 |  |  |     | <i>ILKAP</i>     | Body    |
| cg24361265 | 15 | 44,068,668  | 0.001152 | -0.406 | -0.430 |  |  |     | <i>ELL3</i>      | Body    |
| cg00014152 | X  | 48,457,128  | 0.007627 | -0.406 | -0.244 |  |  |     | <i>WDR13</i>     | Body    |
| cg23821359 | 13 | 112,903,015 | 1.92E-11 | -0.407 | -0.353 |  |  |     |                  |         |
| cg03380809 | 16 | 5,845,458   | 0.006702 | -0.408 | -0.330 |  |  |     |                  |         |
| cg16678111 | 1  | 2,918,724   | 0.001701 | -0.409 | -0.250 |  |  |     |                  |         |
| cg01267270 | 5  | 125,935,359 | 1.69E-24 | -0.409 | -0.389 |  |  |     | <i>PHAX</i>      | TSS1500 |
| cg01915283 | 22 | 39,711,362  | 5.25E-06 | -0.409 | -0.307 |  |  |     | <i>SNORD83A</i>  | TSS200  |
| cg05492975 | 20 | 60,119,508  | 1.76E-10 | -0.410 | -0.410 |  |  |     | <i>CDH4</i>      | Body    |
| cg18032812 | 7  | 56,951,337  | 1.13E-09 | -0.410 | -0.394 |  |  |     |                  |         |
| cg21881184 | 19 | 1,993,022   | 1.09E-10 | -0.410 | -0.403 |  |  |     | <i>BTBD2</i>     | Body    |
| cg23265009 | 7  | 97,844,947  | 2.41E-17 | -0.410 | -0.363 |  |  |     |                  |         |

|            |    |             |          |        |        |          |        |     |                 |         |
|------------|----|-------------|----------|--------|--------|----------|--------|-----|-----------------|---------|
| cg21885251 | 8  | 64,314,339  | 0.000117 | -0.410 | -0.322 |          |        |     |                 |         |
| cg26023960 | 14 | 105,242,373 | 0.000008 | -0.413 | -0.328 |          |        |     | <i>AKT1</i>     | Body    |
| cg14179575 | 18 | 13,826,399  | 8.98E-27 | -0.414 | -0.386 |          |        |     | <i>MC5R</i>     | 1stExon |
| cg06906087 | 17 | 80,053,205  | 8.6E-39  | -0.414 | -0.412 |          |        |     | <i>FASN</i>     | Body    |
| cg22687077 | 17 | 76,993,374  | 6.17E-19 | -0.414 | -0.404 |          |        |     | <i>CANT1</i>    | Body    |
| cg05116443 | 20 | 62,562,680  | 5.03E-07 | -0.415 | -0.449 |          |        |     | <i>DNAJC5</i>   | Body    |
| cg14696870 | 1  | 159,258,877 | 9.45E-12 | -0.416 | -0.428 | 5.49E-12 | -0.230 |     | <i>FCER1A</i>   | TSS1500 |
| cg26603632 | 17 | 80,201,887  | 0.000195 | -0.416 | -0.373 |          |        |     |                 |         |
| cg24441810 | 2  | 120,436,039 | 8.73E-05 | -0.417 | -0.515 |          |        |     | <i>TMEM177</i>  | TSS1500 |
| cg26024424 | 12 | 34,552,411  | 3.35E-10 | -0.418 | -0.425 |          |        | Yes |                 |         |
| cg25644015 | 6  | 31,848,099  | 1.83E-20 | -0.419 | -0.411 |          |        |     | <i>EHMT2</i>    | Body    |
| cg12107530 | 10 | 133,806,858 | 2.81E-05 | -0.420 | -0.525 |          |        |     |                 |         |
| cg09267458 | 8  | 47,015,425  | 0.002978 | -0.420 | -0.291 |          |        | Yes |                 |         |
| cg06119201 | 2  | 116,152,853 | 0.000198 | -0.421 | -0.306 |          |        |     | <i>DPP10</i>    | Body    |
| cg04004158 | 16 | 1,152,474   | 7.9E-13  | -0.422 | -0.424 |          |        |     |                 |         |
| cg27224069 | 17 | 32,612,799  | 0.00013  | -0.422 | -0.321 |          |        |     | <i>CCL11</i>    | 1stExon |
| cg20623506 | 17 | 79,813,410  | 2.82E-07 | -0.423 | -0.328 |          |        |     | <i>P4HB</i>     | Body    |
| cg05152432 | 1  | 1,689,887   | 5.85E-15 | -0.425 | -0.354 |          |        |     | <i>NADK</i>     | Body    |
| cg20592144 | 17 | 80,049,216  | 0.000458 | -0.425 | -0.309 |          |        |     | <i>FASN</i>     | Body    |
| cg26824516 | 15 | 101,419,293 | 0.000679 | -0.425 | -0.337 |          |        |     | <i>ALDH1A3</i>  | TSS1500 |
| cg09480190 | 16 | 85,671,771  | 1.39E-27 | -0.426 | -0.414 |          |        |     | <i>KIAA0182</i> | 5'UTR   |
| cg04052038 | 21 | 31,588,123  | 1.36E-23 | -0.426 | -0.429 | 1.93E-18 | -0.291 |     | <i>CLDN8</i>    | 1stExon |
| cg20724168 | 12 | 130,591,337 | 4.86E-14 | -0.426 | -0.374 |          |        |     |                 |         |
| cg13215579 | 14 | 25,900,545  | 5.76E-05 | -0.426 | -0.258 |          |        |     |                 |         |
| cg05294497 | 4  | 1,342,808   | 8.54E-06 | -0.427 | -0.476 |          |        |     | <i>KIAA1530</i> | Body    |
| cg13747275 | 19 | 1,992,952   | 9.25E-08 | -0.428 | -0.396 |          |        |     | <i>BTBD2</i>    | Body    |
| cg08482501 | 20 | 5,282,952   | 1.62E-11 | -0.431 | -0.379 |          |        |     | <i>PROKR2</i>   | Body    |
| cg25052374 | 17 | 76,991,253  | 1.47E-05 | -0.432 | -0.425 |          |        |     | <i>CANT1</i>    | Body    |
| cg04086239 | 16 | 24,067,174  | 7.16E-10 | -0.432 | -0.436 |          |        |     | <i>PRKCB</i>    | Body    |
| cg08424446 | 12 | 133,381,374 | 1.69E-07 | -0.434 | -0.388 |          |        |     | <i>GOLGA3</i>   | Body    |
| cg03935060 | 16 | 10,272,021  | 1.12E-14 | -0.434 | -0.399 |          |        |     | <i>GRIN2A</i>   | Body    |
| cg17362483 | 4  | 177,420,127 | 9.18E-11 | -0.436 | -0.461 |          |        |     |                 |         |
| cg18812904 | 18 | 77,609,087  | 1.04E-09 | -0.437 | -0.396 |          |        |     |                 |         |
| cg03475293 | 6  | 7,051,303   | 0.003782 | -0.439 | -0.342 |          |        |     |                 |         |

|            |    |             |          |        |        |  |     |  |                           |         |
|------------|----|-------------|----------|--------|--------|--|-----|--|---------------------------|---------|
| cg20134541 | 11 | 67,210,130  | 6.77E-54 | -0.439 | -0.425 |  |     |  | <i>CORO1B</i>             | 5'UTR   |
| cg26626251 | 11 | 132,948,177 | 8.97E-07 | -0.440 | -0.367 |  |     |  | <i>OPCML</i>              | Body    |
| cg11600186 | 6  | 32,945,273  | 3.74E-15 | -0.440 | -0.485 |  |     |  | <i>BRD2</i>               | Body    |
| cg02080909 | 17 | 79,058,333  | 5.24E-13 | -0.440 | -0.329 |  |     |  | <i>BAIAP2</i>             | Body    |
| cg13934015 | 9  | 116,812,263 | 4.38E-17 | -0.442 | -0.405 |  |     |  | <i>ZNF618</i>             | Body    |
| cg00178984 | 12 | 60,091,171  | 0.021612 | -0.443 | -0.218 |  |     |  | <i>SLC16A7</i>            | 5'UTR   |
| cg16086130 | 15 | 101,419,275 | 0.000635 | -0.445 | -0.342 |  |     |  | <i>ALDH1A3</i>            | TSS1500 |
| cg06865363 | 12 | 130,591,369 | 3.31E-09 | -0.446 | -0.418 |  |     |  |                           |         |
| cg01077058 | 2  | 241,083,864 | 1.31E-10 | -0.446 | -0.411 |  |     |  |                           |         |
| cg07471018 | 4  | 46,911,550  | 0.002864 | -0.452 | -0.318 |  |     |  | <i>COX7B2</i>             | TSS1500 |
| cg03779973 | 4  | 151,001,971 | 0.000136 | -0.454 | -0.446 |  |     |  | <i>DCLK2</i>              | Body    |
| cg14211055 | 21 | 47,704,251  | 1.75E-20 | -0.456 | -0.426 |  |     |  | <i>MCM3AP</i>             | 1stExon |
| cg12008047 | 19 | 18,497,143  | 1.66E-27 | -0.457 | -0.433 |  |     |  | <i>GDF15</i>              | 1stExon |
| cg26876834 | 16 | 2,013,573   | 6.94E-25 | -0.457 | -0.460 |  |     |  | <i>SNHG9</i>              | TSS1500 |
| cg04904276 | 16 | 11,835,562  | 8.9E-25  | -0.458 | -0.460 |  |     |  | <i>TXNDC11</i>            | Body    |
| cg06741896 | 11 | 69,468,337  | 1.23E-10 | -0.458 | -0.428 |  |     |  | <i>CCND1</i>              | 3'UTR   |
| cg17854981 | 7  | 100,274,472 | 1.44E-11 | -0.461 | -0.396 |  |     |  | <i>GNB2</i>               | Body    |
| cg20446334 | 17 | 79,010,458  | 7.25E-14 | -0.462 | -0.433 |  |     |  | <i>BAIAP2</i>             | Body    |
| cg14646111 | 20 | 18,489,660  | 0.000103 | -0.463 | -0.332 |  |     |  | <i>SEC23B</i>             | 5'UTR   |
| cg09591519 | 6  | 33,241,770  | 3.53E-43 | -0.463 | -0.449 |  |     |  | <i>RPS18</i>              | Body    |
| cg16515500 | 18 | 13,826,508  | 6.23E-18 | -0.464 | -0.443 |  |     |  | <i>MC5R</i>               | 1stExon |
| cg09424006 | 16 | 5,657,230   | 0.002705 | -0.468 | -0.335 |  |     |  |                           |         |
| cg15721142 | 12 | 133,354,410 | 3.67E-12 | -0.469 | -0.423 |  |     |  | <i>GOLGA3</i>             | Body    |
| cg25590114 | 11 | 1,661,201   | 6.35E-08 | -0.472 | -0.372 |  |     |  | <i>HCCA2</i>              | Body    |
| cg21464492 | 2  | 1,691,062   | 2.39E-34 | -0.478 | -0.471 |  |     |  | <i>PXDN</i>               | Body    |
| cg16709294 | 14 | 70,235,567  | 0.001149 | -0.481 | -0.516 |  |     |  | <i>SFRS5</i>              | Body    |
| cg14671764 | 2  | 1,690,592   | 1.43E-30 | -0.486 | -0.476 |  |     |  | <i>PXDN</i>               | Body    |
| cg26522368 | 19 | 49,703,932  | 3.02E-95 | -0.488 | -0.472 |  |     |  | <i>TRPM4</i>              | Body    |
| cg17435901 | 6  | 33,169,600  | 5.15E-22 | -0.495 | -0.484 |  |     |  | <i>SLC39A7</i>            | Body    |
| cg14527262 | 4  | 1,202,653   | 7.25E-08 | -0.496 | -0.395 |  |     |  | <i>LOC100130872-SPON2</i> | TSS200  |
| cg04228083 | 4  | 1,202,657   | 3.15E-12 | -0.499 | -0.422 |  | Yes |  | <i>LOC100130872-SPON2</i> | TSS200  |
| cg08465307 | 1  | 3,827,081   | 1.83E-23 | -0.500 | -0.504 |  |     |  | <i>LOC100133612</i>       | Body    |
| cg23911097 | 17 | 76,991,378  | 3.26E-07 | -0.503 | -0.500 |  |     |  | <i>CANT1</i>              | Body    |
| cg00177787 | 10 | 3,330,480   | 5.08E-14 | -0.506 | -0.441 |  |     |  |                           |         |

|            |    |             |          |        |        |  |  |  |                  |        |
|------------|----|-------------|----------|--------|--------|--|--|--|------------------|--------|
| cg27020349 | 6  | 144,643,175 | 6.25E-16 | -0.529 | -0.511 |  |  |  | <i>UTRN</i>      | Body   |
| cg00186815 | 8  | 1,048,135   | 8.03E-12 | -0.531 | -0.572 |  |  |  |                  |        |
| cg00902147 | 17 | 76,993,394  | 2.26E-20 | -0.536 | -0.526 |  |  |  | <i>CANT1</i>     | Body   |
| cg26864905 | 6  | 137,366,369 | 2.12E-15 | -0.536 | -0.484 |  |  |  | <i>IL20RA</i>    | TSS200 |
| cg24090529 | 7  | 97,844,910  | 8.52E-18 | -0.546 | -0.473 |  |  |  |                  |        |
| cg22714290 | 1  | 207,992,548 | 2.68E-18 | -0.576 | -0.542 |  |  |  | <i>LOC148696</i> | Body   |
| cg04194055 | 17 | 77,953,088  | 4.56E-19 | -0.680 | -0.673 |  |  |  | <i>TBC1D16</i>   | Body   |
| cg14193007 | 17 | 77,953,016  | 5.35E-19 | -0.694 | -0.696 |  |  |  | <i>TBC1D16</i>   | Body   |

\*Methylation difference between PCa and normal (Tumor - Normal).

#HM27 [18]
