# Supplementary material for: Identification of New Differentially Methylated Genes That Have Potential Functional Consequences in Prostate Cancer
Source: PubMed Central journal article supplement (PMC3485209; doi:10.1371/journal.pone.0048455), 2012-10-31
Supplement: pone.0048455.s011.pdf [file pone.0048455.s011.pdf]

Table S4. Comparison of differentially methylated genes between genome-wide profiles and 67 known methylated genes in PCa.

|                           | HM450 | N-NGS <sup>1</sup> | HM27 |
|---------------------------|-------|--------------------|------|
| No. of indentified genes* | 2874  | 2318               | 363  |
| No. of common genes       | 32    | 20                 | 15   |

\* The number of promoter hypermethylated genes in each data set.

<sup>1</sup> Cancer-specific methylation only (Group 1 and 2 only)
