# Supplementary material for: Identification of New Differentially Methylated Genes That Have Potential Functional Consequences in Prostate Cancer
Source: PubMed Central journal article supplement (PMC3485209; doi:10.1371/journal.pone.0048455), 2012-10-31
Supplement: pone.0048455.s012.pdf [file pone.0048455.s012.pdf]

Table S5. Differentially methylated genes by combination of DNA methylation and gene expression data.

| Gene Symbol     | Gene expression <sup>1</sup> |                                     | HM450                   |                 | HM27 <sup>1</sup> |                 | M-NGS <sup>1</sup> | Known methylated gene |
|-----------------|------------------------------|-------------------------------------|-------------------------|-----------------|-------------------|-----------------|--------------------|-----------------------|
|                 | FDR <i>P</i>                 | $\Delta$ Log Intensity <sup>2</sup> | No. of DMC <sup>3</sup> | $\Delta\beta^2$ | FDR <i>P</i>      | $\Delta\beta^2$ |                    |                       |
| <i>AOX1</i>     | 1.5E-08                      | -1.07                               | 11                      | 0.52            | 2.8E-23           | 0.33            | cDMR               |                       |
| <i>GSTP1</i>    | 1.1E-09                      | -1.05                               | 3                       | 0.48            | 3.6E-28           | 0.31            |                    | Yes                   |
| <i>CAV1</i>     | 4.0E-09                      | -1.04                               | 8                       | 0.43            | 9.5E-26           | 0.24            |                    | Yes                   |
| <i>FABP3</i>    | 1.5E-08                      | -0.76                               | 5                       | 0.41            |                   |                 |                    |                       |
| <i>TIMP2</i>    | 5.0E-06                      | -0.73                               | 3                       | 0.57            |                   |                 | cDMR               |                       |
| <i>GSTM2</i>    | 2.4E-06                      | -0.69                               | 6                       | 0.44            | 1.8E-19           | 0.23            | cDMR               |                       |
| <i>ANXA2</i>    | 5.2E-07                      | -0.69                               | 7                       | 0.50            |                   |                 | cDMR               |                       |
| <i>EFEMP1</i>   | 7.6E-07                      | -0.68                               | 5                       | 0.47            | 1.2E-27           | 0.28            | cDMR               |                       |
| <i>ANXA6</i>    | 3.2E-07                      | -0.66                               | 5                       | 0.52            | 1.3E-30           | 0.29            | cDMR               |                       |
| <i>ACSF2</i>    | 7.8E-10                      | -0.64                               | 3                       | 0.49            | 4.0E-33           | 0.29            | cDMR               |                       |
| <i>ACSS3</i>    | 2.8E-07                      | -0.60                               | 13                      | 0.40            | 3.7E-24           | 0.21            |                    |                       |
| <i>TMLHE</i>    | 1.4E-08                      | -0.60                               | 8                       | 0.42            | 2.6E-27           | 0.24            | cDMR               |                       |
| <i>C5orf4</i>   | 7.7E-10                      | -0.60                               | 5                       | 0.48            | 7.1E-26           | 0.24            |                    |                       |
| <i>WFDC2</i>    | 3.7E-08                      | -0.60                               | 7                       | 0.48            | 1.0E-27           | 0.22            | cDMR               |                       |
| <i>CRABP2</i>   | 6.0E-07                      | -0.59                               | 3                       | 0.40            |                   |                 | cDMR               |                       |
| <i>HLF</i>      | 1.4E-06                      | -0.57                               | 4                       | 0.40            |                   |                 | cDMR               |                       |
| <i>GPRC5B</i>   | 1.2E-07                      | -0.56                               | 2                       | 0.53            |                   |                 | cDMR               |                       |
| <i>GLI3</i>     | 1.2E-07                      | -0.56                               | 4                       | 0.53            |                   |                 |                    |                       |
| <i>EYA4</i>     | 6.5E-07                      | -0.55                               | 16                      | 0.43            | 9.5E-16           | 0.17            | cDMR               |                       |
| <i>PRICKLE2</i> | 3.2E-08                      | -0.55                               | 3                       | 0.41            | 1.0E-07           | 0.10            |                    |                       |
| <i>FIBIN</i>    | 2.4E-03                      | -0.52                               | 6                       | 0.44            | 3.5E-33           | 0.31            |                    |                       |
| <i>COL4A6</i>   | 1.1E-09                      | -0.50                               | 2                       | 0.57            |                   |                 |                    |                       |
| <i>ITIH5</i>    | 7.6E-08                      | -0.48                               | 4                       | 0.42            |                   |                 | cDMR               |                       |
| <i>ZNF154</i>   | 2.5E-08                      | -0.48                               | 9                       | 0.40            | 2.9E-21           | 0.33            | cDMR               |                       |
| <i>PRKCB</i>    | 5.9E-05                      | -0.47                               | 4                       | 0.49            | 5.9E-15           | 0.22            |                    |                       |
| <i>LAYN</i>     | 3.1E-07                      | -0.47                               | 9                       | 0.44            |                   |                 | cDMR               |                       |
| <i>NUAK1</i>    | 5.9E-07                      | -0.46                               | 8                       | 0.59            | 8.4E-31           | 0.28            | cDMR               |                       |
| <i>RARB</i>     | 1.4E-06                      | -0.45                               | 18                      | 0.60            | 1.6E-27           | 0.33            |                    | Yes                   |
| <i>RAPGEFL1</i> | 3.2E-07                      | -0.45                               | 7                       | 0.42            |                   |                 |                    |                       |
| <i>MARVELD1</i> | 1.5E-08                      | -0.45                               | 4                       | 0.48            |                   |                 |                    |                       |
| <i>GPRASP1</i>  | 2.7E-09                      | -0.44                               | 10                      | 0.43            | 8.5E-29           | 0.20            |                    |                       |
| <i>NNT</i>      | 6.0E-07                      | -0.44                               | 4                       | 0.53            |                   |                 | cDMR               |                       |
| <i>PFKP</i>     | 1.0E-05                      | -0.44                               | 4                       | 0.50            |                   |                 |                    |                       |
| <i>CD200</i>    | 3.0E-04                      | -0.43                               | 4                       | 0.40            | 6.7E-12           | 0.15            |                    |                       |
| <i>COL4A5</i>   | 9.1E-10                      | -0.43                               | 2                       | 0.43            |                   |                 |                    |                       |
| <i>FBXO30</i>   | 1.5E-06                      | -0.43                               | 4                       | 0.50            |                   |                 |                    |                       |
| <i>IFITM1</i>   | 2.3E-04                      | -0.42                               | 3                       | 0.41            |                   |                 |                    |                       |
| <i>CLIP4</i>    | 4.1E-05                      | -0.41                               | 9                       | 0.57            | 1.2E-32           | 0.28            |                    |                       |
| <i>STK33</i>    | 2.3E-06                      | -0.41                               | 4                       | 0.41            |                   |                 |                    |                       |
| <i>MMP2</i>     | 4.5E-03                      | -0.41                               | 4                       | 0.42            | 3.5E-24           | 0.20            | cDMR               |                       |
| <i>RNF152</i>   | 5.9E-07                      | -0.40                               | 8                       | 0.49            | 9.3E-25           | 0.28            | cDMR               |                       |
| <i>FHL2</i>     | 5.6E-06                      | -0.39                               | 7                       | 0.40            | 2.3E-25           | 0.22            | cDMR               |                       |

|                  |         |       |    |      |         |      |      |     |
|------------------|---------|-------|----|------|---------|------|------|-----|
| <i>APOBEC3G</i>  | 1.5E-08 | -0.38 | 2  | 0.42 |         |      |      |     |
| <i>SPARC</i>     | 2.0E-02 | -0.38 | 6  | 0.47 | 6.1E-22 | 0.22 | cDMR |     |
| <i>SLC16A5</i>   | 2.2E-07 | -0.37 | 9  | 0.44 | 7.4E-37 | 0.27 |      |     |
| <i>FGFR1</i>     | 1.0E-05 | -0.37 | 3  | 0.49 |         |      |      |     |
| <i>MFAP4</i>     | 2.3E-02 | -0.36 | 7  | 0.42 | 7.7E-16 | 0.12 |      |     |
| <i>FBLN5</i>     | 2.8E-02 | -0.36 | 3  | 0.50 | 2.5E-22 | 0.14 |      |     |
| <i>ADD3</i>      | 1.7E-02 | -0.35 | 3  | 0.48 |         |      | cDMR |     |
| <i>BMP7</i>      | 2.3E-04 | -0.35 | 6  | 0.42 |         |      |      |     |
| <i>RAI14</i>     | 1.9E-03 | -0.33 | 2  | 0.45 |         |      |      |     |
| <i>CYP27A1</i>   | 6.3E-03 | -0.33 | 4  | 0.58 |         |      | cDMR |     |
| <i>SERPINB1</i>  | 1.7E-03 | -0.33 | 9  | 0.47 | 4.6E-21 | 0.26 | cDMR |     |
| <i>ZNF660</i>    | 2.8E-07 | -0.32 | 7  | 0.42 | 2.9E-11 | 0.21 | cDMR |     |
| <i>BCAR3</i>     | 2.0E-08 | -0.32 | 2  | 0.41 | 4.6E-27 | 0.21 |      |     |
| <i>EFS</i>       | 1.5E-07 | -0.32 | 11 | 0.50 | 8.1E-33 | 0.23 |      |     |
| <i>PODN</i>      | 1.1E-02 | -0.32 | 4  | 0.43 | 7.2E-23 | 0.26 | cDMR |     |
| <i>LDB1</i>      | 1.4E-05 | -0.32 | 5  | 0.52 |         |      |      |     |
| <i>C2orf43</i>   | 2.0E-03 | -0.32 | 8  | 0.43 | 7.7E-22 | 0.19 |      |     |
| <i>FBXO17</i>    | 2.5E-08 | -0.32 | 6  | 0.44 |         |      |      |     |
| <i>TRIP6</i>     | 4.5E-06 | -0.30 | 3  | 0.56 |         |      |      |     |
| <i>SPRY4</i>     | 3.6E-02 | -0.30 | 5  | 0.50 |         |      | cDMR |     |
| <i>VIM</i>       | 2.3E-02 | -0.30 | 11 | 0.42 |         |      | cDMR |     |
| <i>PRKY</i>      | 6.1E-06 | -0.29 | 3  | 0.57 |         |      | cDMR |     |
| <i>PLEKHH2</i>   | 4.2E-05 | -0.28 | 3  | 0.43 |         |      |      |     |
| <i>KLF8</i>      | 5.2E-07 | -0.28 | 12 | 0.52 | 8.2E-24 | 0.28 |      |     |
| <i>PDGFRA</i>    | 2.3E-02 | -0.27 | 5  | 0.42 |         |      | cDMR |     |
| <i>DDX26B</i>    | 1.5E-06 | -0.27 | 3  | 0.43 |         |      |      |     |
| <i>PRIMA1</i>    | 5.6E-04 | -0.25 | 3  | 0.45 | 9.1E-21 | 0.28 |      | Yes |
| <i>HOPX</i>      | 6.6E-04 | -0.25 | 7  | 0.50 |         |      | cDMR |     |
| <i>C16orf5</i>   | 5.2E-04 | -0.24 | 4  | 0.41 |         |      | cDMR |     |
| <i>HAAO</i>      | 6.2E-05 | -0.24 | 10 | 0.45 | 5.8E-19 | 0.31 | cDMR |     |
| <i>IQCA1</i>     | 2.8E-06 | -0.24 | 2  | 0.41 |         |      | cDMR |     |
| <i>C2orf88</i>   | 2.6E-04 | -0.23 | 10 | 0.52 |         |      |      |     |
| <i>PROM1</i>     | 4.6E-02 | -0.23 | 9  | 0.46 |         |      |      |     |
| <i>MACF1</i>     | 3.3E-03 | -0.23 | 7  | 0.50 | 2.3E-23 | 0.17 |      |     |
| <i>EVC2</i>      | 2.2E-06 | -0.22 | 7  | 0.46 |         |      | cDMR |     |
| <i>AKR1B1</i>    | 8.6E-07 | -0.22 | 10 | 0.40 | 1.8E-15 | 0.26 | cDMR |     |
| <i>LOC644538</i> | 6.6E-04 | -0.21 | 5  | 0.46 |         |      |      |     |
| <i>ZNF655</i>    | 4.6E-03 | -0.21 | 14 | 0.46 | 8.5E-19 | 0.13 | cDMR |     |
| <i>TMEM106A</i>  | 1.3E-05 | -0.21 | 8  | 0.54 | 6.4E-25 | 0.17 | cDMR |     |
| <i>N4BP2L1</i>   | 8.5E-05 | -0.19 | 2  | 0.42 |         |      | cDMR |     |
| <i>SCGB3A1</i>   | 2.7E-03 | -0.19 | 7  | 0.54 | 1.3E-25 | 0.20 |      | Yes |
| <i>DSE</i>       | 9.2E-03 | -0.19 | 4  | 0.43 | 2.8E-23 | 0.24 |      |     |
| <i>PLD3</i>      | 1.2E-03 | -0.19 | 3  | 0.49 |         |      |      |     |
| <i>APC</i>       | 1.9E-02 | -0.19 | 15 | 0.43 | 5.3E-10 | 0.26 | cDMR | Yes |
| <i>CHST3</i>     | 4.7E-03 | -0.19 | 4  | 0.60 |         |      |      |     |
| <i>HOXA7</i>     | 5.1E-04 | -0.18 | 9  | 0.54 | 5.5E-16 | 0.18 |      |     |
| <i>ELF4</i>      | 9.0E-05 | -0.18 | 6  | 0.52 | 1.6E-31 | 0.34 |      |     |

|                     |         |       |    |       |         |       |      |     |
|---------------------|---------|-------|----|-------|---------|-------|------|-----|
| <i>CBX5</i>         | 2.5E-02 | -0.18 | 5  | 0.43  |         |       | cDMR |     |
| <i>NFATC3</i>       | 2.6E-03 | -0.18 | 3  | 0.48  | 3.8E-41 | 0.24  | cDMR |     |
| <i>ALDH1L1</i>      | 1.2E-02 | -0.17 | 10 | 0.52  |         |       |      |     |
| <i>FAIM2</i>        | 2.6E-02 | -0.17 | 6  | 0.44  | 1.3E-21 | 0.25  | cDMR |     |
| <i>LRRC17</i>       | 4.9E-03 | -0.17 | 6  | 0.43  | 1.8E-23 | 0.27  |      |     |
| <i>CYBA</i>         | 4.3E-02 | -0.17 | 13 | 0.56  | 2.8E-33 | 0.36  |      |     |
| <i>DHRS4L2</i>      | 5.8E-05 | -0.16 | 8  | 0.52  | 9.6E-25 | 0.14  | cDMR |     |
| <i>MMGT1</i>        | 1.3E-02 | -0.16 | 2  | 0.42  | 8.9E-31 | 0.21  |      |     |
| <i>RAI1</i>         | 1.1E-04 | -0.16 | 7  | 0.46  |         |       |      |     |
| <i>ATXN7L1</i>      | 2.6E-05 | -0.16 | 2  | 0.42  |         |       | cDMR |     |
| <i>FLOT1</i>        | 2.0E-03 | -0.16 | 7  | 0.47  |         |       | cDMR |     |
| <i>CUL1</i>         | 1.9E-02 | -0.16 | 6  | 0.40  | 1.0E-07 | 0.08  |      |     |
| <i>TSPAN5</i>       | 2.7E-02 | -0.15 | 2  | 0.45  |         |       |      |     |
| <i>DGKZ</i>         | 7.2E-04 | -0.15 | 2  | 0.43  |         |       | cDMR |     |
| <i>SOSTDC1</i>      | 1.9E-02 | -0.14 | 6  | 0.44  | 3.0E-10 | 0.17  |      |     |
| <i>PYCARD</i>       | 2.1E-02 | -0.14 | 9  | 0.41  | 1.3E-23 | 0.20  | cDMR | Yes |
| <i>PPT2</i>         | 3.6E-03 | -0.14 | 25 | 0.47  | 1.2E-28 | 0.30  |      |     |
| <i>KCNH2</i>        | 3.9E-02 | -0.13 | 5  | 0.57  |         |       |      |     |
| <i>RND2</i>         | 2.4E-02 | -0.13 | 2  | 0.56  | 4.7E-28 | 0.38  | cDMR |     |
| <i>USP44</i>        | 3.3E-03 | -0.12 | 4  | 0.46  | 5.4E-09 | 0.07  | cDMR |     |
| <i>SHROOM4</i>      | 2.6E-03 | -0.12 | 7  | 0.45  |         |       | cDMR |     |
| <i>CORIN</i>        | 2.7E-02 | -0.12 | 5  | 0.40  | 2.0E-12 | 0.17  | cDMR |     |
| <i>MAN1C1</i>       | 8.3E-03 | -0.12 | 4  | 0.47  | 4.7E-24 | 0.21  |      |     |
| <i>PLEKHA6</i>      | 2.2E-02 | -0.11 | 9  | 0.42  | 5.7E-38 | 0.24  |      |     |
| <i>MCF2</i>         | 1.5E-02 | -0.10 | 6  | 0.43  | 3.8E-20 | 0.22  |      |     |
| <i>C1orf114</i>     | 4.7E-02 | -0.09 | 9  | 0.52  | 3.9E-24 | 0.25  | cDMR |     |
| <i>MC5R</i>         | 3.9E-02 | 0.11  | 3  | -0.46 |         |       |      |     |
| <i>KIAA0182</i>     | 1.2E-02 | 0.14  | 10 | -0.43 |         |       |      |     |
| <i>LOC100130872</i> | 4.1E-03 | 0.35  | 5  | -0.50 |         |       |      |     |
| <i>ALDH1A3</i>      | 6.0E-07 | 0.61  | 8  | -0.45 | 1.2E-20 | -0.20 |      |     |
| <i>CLDN8</i>        | 2.4E-07 | 0.81  | 4  | -0.43 | 1.9E-18 | -0.29 |      |     |
| <i>SPON2</i>        | 3.1E-04 | 0.93  | 5  | -0.50 |         |       |      |     |
| <i>GDF15</i>        | 6.0E-07 | 1.06  | 2  | -0.46 |         |       | cDMR |     |

1. HM27 [18], M-NGS [16], Expression [29], Known methylated gene [10]

2. Difference between PCa and normal (Tumor - Normal).  $\Delta\beta$  (methylation difference) indicated the biggest difference one among multiple DMCs.

3. Only located in the proximal promoter.
