# Supplementary material for: Identification of New Differentially Methylated Genes That Have Potential Functional Consequences in Prostate Cancer
Source: PubMed Central journal article supplement (PMC3485209; doi:10.1371/journal.pone.0048455), 2012-10-31
Supplement: pone.0048455.s014.pdf [file pone.0048455.s014.pdf]

|        |        |     |    |    |      |      |      |      |      |      |      |      |      |      |      |      |      |      |      |      |      |      |      |      |      |      |      |      |      |      |      |      |
|--------|--------|-----|----|----|------|------|------|------|------|------|------|------|------|------|------|------|------|------|------|------|------|------|------|------|------|------|------|------|------|------|------|------|
| G9-013 | Tumor  | Yes | 12 | EA | 0.83 | 0.83 | 0.50 | 0.75 | 0.75 | 0.83 | 0.83 | 0.75 | 0.75 | 0.75 | 0.92 | 0.75 | 0.80 | 0.92 | 0.92 | 0.92 | 0.92 | 0.92 | 1.00 | 0.75 | 0.83 | 0.92 | 0.92 | 0.83 | 0.92 | 0.58 | 0.50 |      |
| G9-013 | Normal | Yes | 10 | EA | 0.30 | 0.00 | 0.30 | 0.30 | 0.20 | 0.20 | 0.40 | 0.33 | 0.40 | 0.30 | 0.30 | 0.40 | 0.40 | 0.50 | 0.50 | 0.56 | 0.10 | 0.50 | 0.50 | 0.40 | 0.50 | 0.40 | 0.50 | 0.50 | 0.50 | 0.60 | 0.50 |      |
| G9-015 | Tumor  | Yes | 10 | EA | 0.40 | 0.60 | 0.00 | 0.20 | 0.40 | 0.40 | 0.70 | 0.70 | 0.50 | 0.40 | 0.60 | 0.40 | 0.20 | 0.00 | 0.30 | 0.20 | 0.10 | 0.22 | 0.20 | 0.10 | 0.10 | 0.10 | 0.22 | 0.10 | 0.00 | 0.00 | 0.00 |      |
| G9-015 | Normal | Yes | 11 | EA | 0.27 | 0.09 | 0.18 | 0.36 | 0.46 | 0.64 | 0.46 | 0.55 | 0.55 | 0.36 | 0.64 | 0.46 | 0.55 | 0.55 | 0.55 | 0.91 | 0.80 | 0.73 | 0.91 | 0.91 | 0.64 | 0.64 | 0.82 | 0.55 | 0.73 | 0.55 | 0.55 |      |
| GN-001 | Tumor  | Yes | 12 | EA | 0.58 | 0.58 | 0.42 | 0.50 | 0.50 | 0.58 | 0.58 | 0.58 | 0.58 | 0.58 | 0.58 | 0.58 | 0.50 | 0.50 | 0.58 | 0.58 | 0.58 | 0.58 | 0.58 | 0.58 | 0.64 | 0.50 | 0.50 | 0.58 | 0.58 | 0.58 | 0.50 |      |
| GN-001 | Normal | Yes | 11 | EA | 0.09 | 0.00 | 0.00 | 0.64 | 0.64 | 0.64 | 1.00 | 0.73 | 0.09 | 0.64 | 0.73 | 0.64 | 1.00 | 1.00 | 1.00 | 0.73 | 1.00 | 1.00 | 1.00 | 1.00 | 1.00 | 1.00 | 1.00 | 0.73 | 0.36 | 0.36 | 0.00 | 1.00 |

\*EA: European American, AA: African American.
