# Supplementary material for: Identification of New Differentially Methylated Genes That Have Potential Functional Consequences in Prostate Cancer
Source: PubMed Central journal article supplement (PMC3485209; doi:10.1371/journal.pone.0048455), 2012-10-31
Supplement: pone.0048455.s015.pdf [file pone.0048455.s015.pdf]

Table S8. List of Gleason score-associated DMCs in PCa.

| Taeget_ID  | chr | locus       | FDR P   | $\Delta\beta^*$ | Gene Symbol        | Genomic region |
|------------|-----|-------------|---------|-----------------|--------------------|----------------|
| cg14117320 | 11  | 17,032,483  | 9.5E-30 | 0.38            | <i>PLEKHA7</i>     | Body           |
| cg09491897 | 17  | 78,935,269  | 1.1E-18 | -0.31           | <i>RPTOR</i>       | Body           |
| cg07964113 | 17  | 78,935,289  | 1.4E-08 | -0.24           | <i>RPTOR</i>       | Body           |
| cg07217350 | 5   | 162,934,022 | 2.7E-07 | 0.21            | <i>MAT2B</i>       | Body           |
| cg13690280 | 9   | 112,562,314 | 9.4E-05 | 0.22            | <i>PALM2-AKAP2</i> | Body           |
| cg05315334 | 13  | 113,656,212 | 3.0E-04 | -0.27           | <i>MCF2L</i>       | Body           |
| cg22329423 | 20  | 21,490,572  | 3.0E-04 | 0.25            |                    |                |
| cg06233593 | 16  | 337,645     | 5.7E-04 | -0.22           | <i>AXIN1</i>       | 3'UTR          |
| cg03362815 | 16  | 50,407,774  | 8.6E-04 | 0.22            |                    |                |
| cg06868132 | 5   | 178,987,429 | 1.9E-03 | -0.21           | <i>RUFY1</i>       | Body           |
| cg14794741 | 1   | 7,408,911   | 1.9E-03 | 0.20            | <i>CAMTA1</i>      | Body           |
| cg10772532 | 14  | 81,405,846  | 2.1E-03 | -0.36           | <i>C14orf145</i>   | 1stExon        |
| cg01135780 | 5   | 158,527,707 | 2.4E-03 | -0.26           | <i>EBF1</i>        | TSS1500        |
| cg03177600 | 3   | 164,911,744 | 3.2E-03 | 0.21            | <i>SLITRK3</i>     | 5'UTR          |
| cg20497212 | 7   | 36,672,687  | 5.2E-03 | 0.24            | <i>AOAH</i>        | Body           |
| cg13619408 | 1   | 109,756,118 | 5.3E-03 | -0.21           | <i>SARS</i>        | TSS1500        |
| cg20980653 | 6   | 33,143,760  | 6.2E-03 | 0.21            | <i>COL11A2</i>     | Body           |
| cg03871124 | 7   | 1,643,681   | 6.5E-03 | 0.23            |                    |                |
| cg22264898 | 18  | 3,297,176   | 6.7E-03 | -0.33           |                    |                |
| cg04929022 | X   | 135,617,792 | 6.9E-03 | 0.20            | <i>VGLL1</i>       | 5'UTR          |
| cg07639198 | 10  | 5,004,250   | 7.2E-03 | 0.23            | <i>AKR1C1</i>      | TSS1500        |
| cg00292312 | 1   | 7,318,138   | 1.0E-02 | 0.21            | <i>CAMTA1</i>      | Body           |
| cg05922453 | 16  | 50,425,414  | 1.0E-02 | 0.22            |                    |                |
| cg21094405 | 13  | 113,656,117 | 1.6E-02 | -0.25           | <i>MCF2L</i>       | Body           |
| cg07259110 | 17  | 62,098,222  | 1.8E-02 | 0.20            | <i>ICAM2</i>       | TSS1500        |
| cg12691631 | 4   | 23,891,835  | 1.9E-02 | 0.25            | <i>PPARGC1A</i>    | TSS200         |
| cg10649525 | 7   | 87,974,756  | 2.7E-02 | 0.20            |                    |                |
| cg05534186 | 5   | 54,530,279  | 2.8E-02 | -0.20           | <i>CCNO</i>        | TSS1500        |
| cg22541755 | 2   | 10,183,094  | 2.9E-02 | -0.22           | <i>KLF11</i>       | TSS1500        |
| cg26920627 | 1   | 7,319,248   | 2.9E-02 | 0.20            | <i>CAMTA1</i>      | Body           |
| cg14964336 | 4   | 1,523,275   | 3.0E-02 | -0.25           |                    |                |
| cg24729983 | 5   | 54,530,114  | 3.0E-02 | -0.21           | <i>CCNO</i>        | TSS1500        |
| cg06346388 | 4   | 13,539,513  | 4.1E-02 | 0.22            |                    |                |
| cg27027827 | 8   | 55,383,182  | 4.1E-02 | 0.26            |                    |                |
| cg11668844 | 13  | 113,655,622 | 4.2E-02 | -0.23           | <i>MCF2L</i>       | Body           |
| cg19975916 | 12  | 123,215,308 | 4.2E-02 | -0.22           | <i>GPR81</i>       | TSS200         |
| cg03673737 | 7   | 87,974,733  | 4.3E-02 | 0.22            |                    |                |
| cg04300684 | 4   | 1,523,326   | 4.6E-02 | -0.23           |                    |                |
| cg03075487 | 10  | 125,257,350 | 4.7E-02 | 0.21            |                    |                |
| cg22366088 | 4   | 154,713,789 | 4.7E-02 | 0.23            |                    |                |

\*Methylation difference between higher Gleason and lower Gleason PCa (higher - lower).
