# Supplementary material for: Identification of New Differentially Methylated Genes That Have Potential Functional Consequences in Prostate Cancer
Source: PLoS One. 2012 Oct 31;7(10):e48455. doi: 10.1371/journal.pone.0048455 (PMC3485209; doi:10.1371/journal.pone.0048455)
Supplement: Table S6 — Results of bisulfite sequencing in the AOX1 promoter region. (PDF) [file pone.0048455.s013.pdf]

Table S6. Results of bisulfite sequencing in the *AOX1* promoter region.

| Sample  | Phenot<br>ype | Pair | No. of<br>tested<br>clones | Race* | CpG_1 | CpG_3 | CpG_4 | CpG_5 | CpG_6 | CpG_7 | CpG_8 | CpG_9 | CpG_10 | CpG_11 | CpG_12 | CpG_13 | CpG_14 | CpG_15 | CpG_16 | CpG_17 | CpG_18 | CpG_19 | CpG_20 | CpG_21 | CpG_22 | CpG_23 | CpG_24 | CpG_25 | CpG_26 | CpG_27 | CpG_28 | CpG_29 | CpG_30 | CpG_31 | CpG_32 | CpG_33 | CpG_35 | CpG_36 |      |      |
|---------|---------------|------|----------------------------|-------|-------|-------|-------|-------|-------|-------|-------|-------|--------|--------|--------|--------|--------|--------|--------|--------|--------|--------|--------|--------|--------|--------|--------|--------|--------|--------|--------|--------|--------|--------|--------|--------|--------|--------|------|------|
| G10-001 | Tumor         | Yes  | 10                         | EA    | 1.00  | 1.00  | 1.00  | 1.00  | 0.80  | 0.80  | 1.00  | 1.00  | 1.00   | 1.00   | 1.00   | 1.00   | 1.00   | 1.00   | 1.00   | 0.90   | 1.00   | 1.00   | 1.00   | 1.00   | 0.89   | 1.00   | 1.00   | 1.00   | 1.00   | 1.00   | 1.00   | 1.00   | 0.80   | 0.80   | 1.00   | 1.00   | 1.00   | 1.00   | 1.00 |      |
| G10-001 | Normal        | Yes  | 12                         | EA    | 0.00  | 0.00  | 0.00  | 0.00  | 0.00  | 0.00  | 0.00  | 0.00  | 0.00   | 0.00   | 0.00   | 0.00   | 0.00   | 0.08   | 0.00   | 0.00   | 0.00   | 0.00   | 0.00   | 0.00   | 0.00   | 0.00   | 0.00   | 0.00   | 0.00   | 0.00   | 0.00   | 0.00   | 0.00   | 0.00   | 0.00   | 0.00   | 0.00   | 0.00   |      |      |
| G10-002 | Tumor         | Yes  | 10                         | .     | 0.60  | 0.70  | 0.70  | 0.70  | 0.70  | 0.70  | 0.70  | 0.70  | 0.70   | 0.90   | 0.70   | 0.70   | 0.70   | 0.70   | 0.70   | 0.70   | 0.70   | 0.70   | 0.70   | 0.70   | 0.70   | 0.70   | 0.70   | 0.70   | 0.60   | 0.70   | 0.70   | 0.70   | 0.70   | 0.70   | 0.70   | 0.70   | 0.70   | 0.70   | 1.00 |      |
| G10-002 | Normal        | Yes  | 12                         | .     | 0.00  | 0.00  | 0.00  | 0.00  | 0.00  | 0.00  | 0.00  | 0.00  | 0.00   | 0.00   | 0.00   | 0.00   | 0.00   | 0.00   | 0.08   | 0.00   | 0.00   | 0.00   | 0.00   | 0.00   | 0.00   | 0.00   | 0.00   | 0.00   | 0.00   | 0.00   | 0.08   | 0.17   | 0.17   | 0.00   | 0.00   | 0.00   | 0.08   | 0.17   |      |      |
| G6-002  | Tumor         | Yes  | 11                         | EA    | 0.55  | 0.55  | 0.46  | 0.64  | 0.18  | 0.27  | 0.64  | 0.27  | 0.55   | 0.64   | 0.64   | 0.64   | 0.64   | 0.36   | 0.64   | 0.64   | 0.64   | 0.64   | 0.64   | 0.64   | 0.73   | 0.73   | 0.73   | 0.73   | 0.73   | 0.73   | 0.73   | 0.73   | 0.73   | 0.73   | 0.73   | 0.73   | 0.73   | 0.73   | 0.73 | 0.73 |
| G6-002  | Normal        | Yes  | 15                         | EA    | 0.00  | 0.00  | 0.00  | 0.00  | 0.00  | 0.00  | 0.00  | 0.07  | 0.07   | 0.00   | 0.00   | 0.00   | 0.00   | 0.00   | 0.07   | 0.00   | 0.00   | 0.00   | 0.00   | 0.00   | 0.00   | 0.00   | 0.00   | 0.13   | 0.00   | 0.07   | 0.07   | 0.00   | 0.00   | 0.00   | 0.00   | 0.00   | 0.00   | 0.07   | 0.07 |      |
| G6-003  | Tumor         | Yes  | 10                         | EA    | 0.40  | 0.30  | 0.50  | 0.50  | 0.50  | 0.50  | 0.50  | 0.50  | 0.56   | 0.60   | 0.50   | 0.50   | 0.50   | 0.50   | 0.40   | 0.50   | 0.50   | 0.50   | 0.50   | 0.50   | 0.60   | 0.60   | 0.60   | 0.50   | 0.50   | 0.50   | 0.50   | 0.50   | 0.56   | 0.50   | 0.40   | 0.60   | 0.50   | 0.70   |      |      |
| G6-003  | Normal        | Yes  | 10                         | EA    | 0.00  | 0.00  | 0.00  | 0.00  | 0.00  | 0.00  | 0.10  | 0.00  | 0.00   | 0.20   | 0.10   | 0.00   | 0.00   | 0.00   | 0.00   | 0.00   | 0.00   | 0.00   | 0.00   | 0.20   | 0.00   | 0.00   | 0.00   | 0.00   | 0.00   | 0.00   | 0.20   | 0.00   | 0.00   | 0.11   | 0.10   | 0.00   | 0.10   | 0.10   |      |      |
| G6-013  | Tumor         | Yes  | 12                         | EA    | 1.00  | 0.25  | 1.00  | 1.00  | 1.00  | 1.00  | 0.92  | 1.00  | 1.00   | 1.00   | 1.00   | 1.00   | 1.00   | 1.00   | 1.00   | 1.00   | 1.00   | 0.92   | 1.00   | 1.00   | 0.92   | 1.00   | 1.00   | 1.00   | 1.00   | 1.00   | 1.00   | 1.00   | 1.00   | 1.00   | 0.25   | 1.00   | 1.00   | 1.00   | 1.00 |      |
| G6-013  | Normal        | Yes  | 12                         | EA    | 0.00  | 0.00  | 0.00  | 0.00  | 0.58  | 0.00  | 0.00  | 0.00  | 0.00   | 0.00   | 0.00   | 0.00   | 0.00   | 0.00   | 0.00   | 0.00   | 0.00   | 0.00   | 0.00   | 0.00   | 0.00   | 0.00   | 0.00   | 0.00   | 0.00   | 0.00   | 0.00   | 0.00   | 0.00   | 0.00   | 0.00   | 0.00   | 0.00   | 0.00   |      |      |
| G6-015  | Tumor         | Yes  | 14                         | EA    | 0.50  | 0.50  | 0.50  | 0.50  | 0.57  | 0.50  | 0.50  | 0.57  | 0.50   | 0.50   | 0.57   | 0.50   | 0.50   | 0.50   | 0.57   | 0.50   | 0.50   | 0.50   | 0.50   | 0.50   | 0.50   | 0.50   | 0.50   | 0.50   | 0.50   | 0.50   | 0.43   | 0.43   | 0.46   | 0.43   | 0.50   | 0.43   | 0.43   | 0.57   |      |      |
| G6-015  | Normal        | Yes  | 13                         | EA    | 0.00  | 0.00  | 0.00  | 0.00  | 0.00  | 0.00  | 0.00  | 0.00  | 0.00   | 0.00   | 0.00   | 0.00   | 0.00   | 0.00   | 0.00   | 0.00   | 0.00   | 0.00   | 0.00   | 0.00   | 0.00   | 0.00   | 0.00   | 0.00   | 0.00   | 0.00   | 0.00   | 0.00   | 0.00   | 0.00   | 0.00   | 0.00   | 0.00   | 0.00   |      |      |
| G6-016  | Tumor         | Yes  | 11                         | EA    | 1.00  | 0.18  | 0.18  | 0.18  | 0.18  | 0.18  | 0.18  | 0.18  | 0.18   | 0.18   | 0.18   | 0.18   | 0.18   | 0.18   | 0.18   | 0.18   | 0.18   | 0.18   | 0.18   | 0.27   | 0.18   | 0.18   | 0.18   | 0.18   | 0.18   | 0.18   | 0.18   | 0.18   | 0.18   | 0.18   | 0.18   | 0.18   | 0.18   | 0.18   | 0.18 |      |
| G6-016  | Normal        | Yes  | 13                         | EA    | 0.00  | 0.00  | 0.15  | 0.00  | 0.00  | 0.00  | 0.00  | 0.00  | 0.00   | 0.00   | 0.00   | 0.00   | 0.08   | 0.00   | 0.00   | 0.00   | 0.15   | 0.00   | 0.00   | 0.00   | 0.00   | 0.00   | 0.00   | 0.00   | 0.23   | 0.39   | 0.00   | 0.00   | 0.00   | 0.00   | 0.46   | 0.00   | 0.00   |        |      |      |
| G6-017  | Tumor         | Yes  | 11                         | AA    | 0.73  | 0.64  | 0.64  | 0.64  | 0.64  | 0.64  | 0.64  | 0.64  | 0.64   | 0.64   | 0.64   | 0.64   | 0.64   | 0.64   | 0.64   | 0.64   | 0.64   | 0.64   | 0.64   | 0.64   | 0.64   | 0.64   | 0.64   | 0.64   | 0.64   | 0.64   | 0.64   | 0.64   | 0.64   | 0.64   | 0.64   | 0.64   | 0.64   | 0.64   |      |      |
| G6-017  | Normal        | Yes  | 12                         | AA    | 0.00  | 0.08  | 0.00  | 0.08  | 0.00  | 0.00  | 0.00  | 0.00  | 0.00   | 0.00   | 0.00   | 0.00   | 0.00   | 0.00   | 0.00   | 0.00   | 0.00   | 0.00   | 0.00   | 0.00   | 0.08   | 0.00   | 0.08   | 0.00   | 0.00   | 0.00   | 0.00   | 0.00   | 0.00   | 0.00   | 0.00   | 0.17   | 0.00   | 0.00   |      |      |
| G6-018  | Tumor         | Yes  | 12                         | EA    | 0.50  | 0.67  | 0.67  | 0.67  | 0.67  | 0.67  | 0.67  | 0.67  | 0.67   | 0.67   | 0.67   | 0.67   | 0.67   | 0.50   | 0.67   | 0.58   | 0.67   | 0.67   | 0.67   | 0.67   | 0.67   | 0.67   | 0.67   | 0.67   | 0.67   | 0.75   | 0.83   | 0.67   | 0.75   | 0.75   | 0.83   | 0.75   | 0.75   | 0.75   |      |      |
| G6-018  | Normal        | Yes  | 10                         | EA    | 0.00  | 0.00  | 0.00  | 0.00  | 0.00  | 0.00  | 0.10  | 0.00  | 0.00   | 0.00   | 0.00   | 0.00   | 0.00   | 0.00   | 0.00   | 0.00   | 0.00   | 0.00   | 0.00   | 0.00   | 0.00   | 0.00   | 0.00   | 0.00   | 0.00   | 0.00   | 0.00   | 0.00   | 0.00   | 0.00   | 0.00   | 0.00   | 0.00   | 0.00   |      |      |
| G6-019  | Tumor         | Yes  | 10                         | EA    | 0.00  | 0.00  | 0.80  | 0.80  | 0.80  | 0.80  | 0.80  | 0.80  | 0.80   | 0.80   | 0.80   | 0.80   | 0.80   | 0.80   | 0.80   | 0.80   | 0.80   | 0.80   | 0.80   | 0.80   | 0.80   | 0.80   | 0.80   | 0.80   | 0.80   | 0.80   | 0.80   | 0.80   | 0.80   | 0.80   | 0.80   | 0.80   | 0.80   | 0.80   | 1.00 |      |
| G6-019  | Normal        | Yes  | 11                         | EA    | 0.00  | 0.00  | 0.00  | 0.00  | 0.55  | 0.00  | 0.00  | 0.00  | 0.00   | 0.00   | 0.27   | 0.27   | 0.00   | 0.00   | 0.00   | 0.00   | 0.00   | 0.00   | 0.09   | 0.00   | 0.00   | 0.00   | 0.00   | 0.27   | 0.00   | 0.00   | 0.00   | 0.00   | 0.00   | 0.00   | 0.00   | 0.18   | 0.00   | 0.00   |      |      |
| G6-020  | Tumor         | Yes  | 12                         | EA    | 0.00  | 0.00  | 0.00  | 0.00  | 0.00  | 0.00  | 0.00  | 0.00  | 0.00   | 0.00   | 0.00   | 0.17   | 0.25   | 0.00   | 0.00   | 0.00   | 0.00   | 0.00   | 0.00   | 0.00   | 0.00   | 0.00   | 0.25   | 0.00   | 0.00   | 0.00   | 0.00   | 0.08   | 0.00   | 0.00   | 0.42   | 0.00   | 0.00   |        |      |      |
| G6-020  | Normal        | Yes  | 11                         | EA    | 0.00  | 0.00  | 0.00  | 0.00  | 0.00  | 0.00  | 0.00  | 0.27  | 0.00   | 0.00   | 0.00   | 0.00   | 0.00   | 0.00   | 0.00   | 0.00   | 0.18   | 0.00   | 0.00   | 0.09   | 0.00   | 0.00   | 0.27   | 0.00   | 0.00   | 0.00   | 0.09   | 0.00   | 0.00   | 0.00   | 0.00   | 0.00   | 0.00   | 0.00   |      |      |
| G7-002  | Tumor         | No   | 15                         | EA    | 1.00  | 0.27  | 1.00  | 1.00  | 1.00  | 1.00  | 1.00  | 1.00  | 1.00   | 1.00   | 1.00   | 1.00   | 1.00   | 1.00   | 1.00   | 1.00   | 1.00   | 1.00   | 1.00   | 1.00   | 1.00   | 1.00   | 0.93   | 1.00   | 1.00   | 1.00   | 1.00   | 1.00   | 1.00   | 1.00   | 1.00   | 1.00   | 1.00   | 1.00   |      |      |
| G7-013  | Tumor         | Yes  | 11                         | EA    | 1.00  | 1.00  | 1.00  | 1.00  | 1.00  | 1.00  | 1.00  | 1.00  | 1.00   | 1.00   | 1.00   | 1.00   | 1.00   | 1.00   | 1.00   | 1.00   | 1.00   | 1.00   | 1.00   | 1.00   | 1.00   | 1.00   | 1.00   | 1.00   | 1.00   | 1.00   | 1.00   | 1.00   | 1.00   | 1.00   | 1.00   | 1.00   | 1.00   | 1.00   |      |      |
| G7-013  | Normal        | Yes  | 10                         | EA    | 0.00  | 0.00  | 1.00  | 0.00  | 1.00  | 0.00  | 1.00  | 0.00  | 1.00   | 0.00   | 1.00   | 0.00   | 1.00   | 0.00   | 1.00   | 0.00   | 1.00   | 0.00   | 1.00   | 0.00   | 1.00   | 0.00   | 1.00   | 0.00   | 1.00   | 0.00   | 1.00   | 1.00   | 1.00   | 1.00   | 1.00   | 1.00   | 1.00   | 1.00   | 1.00 |      |
| G7-015  | Tumor         | Yes  | 15                         | EA    | 0.40  | 0.40  | 0.40  | 0.40  | 0.40  | 0.40  | 0.40  | 0.33  | 0.47   | 0.47   | 0.47   | 0.93   | 0.47   | 0.53   | 0.47   | 0.47   | 0.53   | 0.87   | 0.87   | 0.47   | 0.87   | 0.87   | 0.87   | 0.87   | 0.87   | 0.87   | 0.87   | 0.93   | 0.87   | 0.87   | 0.87   | 0.87   | 0.87   | 0.60   | 0.93 |      |
| G7-015  | Normal        | Yes  | 11                         | EA    | 0.00  | 0.09  | 0.00  | 0.00  | 0.00  | 0.00  | 0.00  | 0.00  | 0.00   | 0.00   | 0.00   | 0.00   | 0.00   | 0.00   | 0.00   | 0.00   | 0.00   | 0.00   | 0.00   | 0.00   | 0.00   | 0.00   | 0.00   | 0.00   | 0.00   | 1.00   | 0.00   | 0.00   | 0.00   | 1.00   | 0.00   | 1.00   | 1.00   |        |      |      |
| G7-016  | Tumor         | Yes  | 13                         | EA    | 0.85  | 0.85  | 0.85  | 0.85  | 0.85  | 0.85  | 0.85  | 0.85  | 0.85   | 0.85   | 0.85   | 0.85   | 0.85   | 0.54   | 0.85   | 0.85   | 0.85   | 0.85   | 0.85   | 0.85   | 0.85   | 0.85   | 0.85   | 0.85   | 0.85   | 0.85   | 0.85   | 0.85   | 0.85   | 0.85   | 0.85   | 0.85   | 0.85   | 0.85   |      |      |
| G7-016  | Normal        | Yes  | 10                         | EA    | 0.00  | 0.00  | 0.00  | 0.00  | 0.00  | 0.00  | 0.20  | 0.20  | 0.00   | 0.00   | 0.00   | 0.00   | 0.00   | 0.00   | 0.00   | 0.00   | 0.00   | 0.00   | 0.00   | 0.00   | 0.00   | 0.20   | 0.00   | 0.00   | 0.00   | 0.20   | 0.00   | 0.00   | 0.00   | 0.00   | 0.00   | 0.00   | 0.00   |        |      |      |
| G7-017  | Tumor         | Yes  | 15                         | EA    | 0.93  | 0.93  | 0.93  | 0.93  | 0.93  | 0.93  | 0.93  | 0.93  | 0.93   | 0.93   | 0.93   | 0.93   | 0.93   | 0.93   | 0.93   | 0.93   | 0.93   | 0.93   | 0.93   | 0.93   | 0.93   | 0.93   | 0.93   | 0.93   | 0.93   | 0.93   | 0.93   | 0.93   | 0.93   | 0.93   | 0.93   | 0.93   | 0.93   | 1.00   |      |      |
| G7-017  | Normal        | Yes  | 11                         | EA    | 0.00  | 0.00  | 0.64  | 0.64  | 0.64  | 0.64  | 0.64  | 0.64  | 0.64   | 0.64   | 0.64   | 0.64   | 0.64   | 0.64   | 0.64   | 0.64   | 0.64   | 0.64   | 0.64   | 0.64   | 0.64   | 0.64   | 0.64   | 0.64   | 0.64   | 0.64   | 0.64   | 0.64   | 0.64   | 0.64   | 0.64   | 0.64   | 0.64   | 0.64   |      |      |
| G7-018  | Tumor         | Yes  | 10                         | EA    | 0.80  | 0.80  | 0.80  | 0.80  | 0.80  | 0.80  | 0.80  | 0.80  | 0.80   | 0.80   | 0.80   | 0.80   | 0.80   | 0.90   | 0.80   | 0.80   | 0.80   | 0.80   | 0.80   | 0.80   | 0.80   | 0.80   | 0.80   | 0.80   | 0.80   | 0.80   | 0.80   | 0.80   | 0.80   | 0.80   | 0.80   | 0.80   | 0.80   | 0.80   |      |      |
| G7-018  | Normal        | Yes  | 15                         | EA    | 0.00  | 0.00  | 0.00  | 0.00  | 0.00  | 0.00  | 0.00  | 0.00  | 0.00   | 0.00   | 0.00   | 0.00   | 0.00   | 0.00   | 0.00   | 0.00   | 0.07   | 0.00   | 0.00   | 0.00   | 0.00   | 0.00   | 0.00   | 0.00   | 0.00   | 0.00   | 0.00   | 0.00   | 0.00   | 0.00   | 0.00   | 0.00   | 1.00   | 0.00   |      |      |
| G7-020  | Tumor         | No   | 13                         | EA    | 0.00  | 0.00  | 0.00  | 0.00  | 0.00  | 0.00  | 0.00  | 0.15  | 0.00   | 0.00   | 0.00   | 0.15   | 0.15   | 0.00   | 0.00   | 0.15   | 0.00   | 0.00   | 0.15   | 0.00   | 0.00   | 0.00   | 0.00   | 0.00   | 0.00   | 0.00   | 0.00   | 0.00   | 0.00   | 0.00   | 0.00   | 0.00   | 0.23   | 0.00   |      |      |
| G7-021  | Tumor         | Yes  | 12                         | EA    | 0.00  | 0.50  | 0.25  | 0.00  | 0.00  | 0.42  | 1.00  | 0.08  | 0.42   | 1.00   | 1.00   | 0.67</ |        |        |        |        |        |        |        |        |        |        |        |        |        |        |        |        |        |        |        |        |        |        |      |      |

\*EA: European American, AA: African American.
